# Supplementary material
Source: PubMed Central journal article supplement (PMC2975945)
Supplement: NIHMS240452-supplement-Supplemental_1.pdf [file NIHMS240452-supplement-Supplemental_1.pdf]

| Protein Description                                                   | Molecular Weight<br>(Da) | IPI Number    | Total Sequence<br>Coverage (%) | Total Unique<br>Peptides |
|-----------------------------------------------------------------------|--------------------------|---------------|--------------------------------|--------------------------|
| 101 KDA PROTEIN.                                                      | 101324                   | IPI00154749.7 | 2.099                          | 1                        |
| 11 KDA PROTEIN.                                                       | 10799                    | IPI00413487.2 | 16.346                         | 1                        |
| 139 KDA PROTEIN.                                                      | 138623                   | IPI00412740.3 | 1.562                          | 1                        |
| 16 KDA PROTEIN.                                                       | 15751                    | IPI00005589.1 | 9.63                           | 1                        |
| 17 KDA PROTEIN.                                                       | 16806                    | IPI00063123.2 | 9.396                          | 1                        |
| 1-ACYL-SN-GLYCEROL-3-PHOSPHATE ACYLTRANSFERASE EPSILON.               | 42072                    | IPI00028491.4 | 6.319                          | 1                        |
| 1-PHOSPHATIDYLINOSITOL-4,5-BISPHOSPHATE PHOSPHODIESTERASE BETA<br>3.  | 138799                   | IPI00010400.1 | 0.81                           | 1                        |
| 1-PHOSPHATIDYLINOSITOL-4,5-BISPHOSPHATE PHOSPHODIESTERASE DELTA<br>1. | 85763                    | IPI00016461.3 | 3.836                          | 1                        |
| 1-PHOSPHATIDYLINOSITOL-4,5-BISPHOSPHATE PHOSPHODIESTERASE<br>GAMMA 2. | 147937                   | IPI00329185.3 | 1.502                          | 1                        |
| 22 KDA PROTEIN.                                                       | 21543                    | IPI00156774.2 | 5.729                          | 1                        |
| 2-5A-DEPENDENT RIBONUCLEASE.                                          | 83533                    | IPI00015864.1 | 1.484                          | 1                        |
| 26 KDA PROTEIN.                                                       | 26210                    | IPI00411735.1 | 3.463                          | 1                        |
| 26 PROTEASOME COMPLEX SUBUNIT DSS1.                                   | 8278                     | IPI00013266.1 | 18.571                         | 1                        |
| 28 KDA PROTEIN.                                                       | 28137                    | IPI00414629.2 | 13.546                         | 1                        |
| 28S RIBOSOMAL PROTEIN S12, MITOCHONDRIAL PRECURSOR.                   | 15173                    | IPI00005692.1 | 8.696                          | 1                        |
| 28S RIBOSOMAL PROTEIN S16, MITOCHONDRIAL PRECURSOR.                   | 15345                    | IPI00032872.3 | 5.109                          | 1                        |
| 29 KDA PROTEIN.                                                       | 29189                    | IPI00258810.2 | 10.465                         | 1                        |
| 3'-5' EXORIBONUCLEASE CSL4 HOMOLOG.                                   | 21452                    | IPI00032823.1 | 5.641                          | 1                        |
| 35 KDA PROTEIN.                                                       | 34787                    | IPI00183661.3 | 4.688                          | 1                        |
| 351 KDA PROTEIN.                                                      | 351224                   | IPI00251344.2 | 1.066                          | 1                        |
| 39 KDA PROTEIN.                                                       | 38647                    | IPI00328338.3 | 3.581                          | 1                        |
| 39S RIBOSOMAL PROTEIN L18, MITOCHONDRIAL PRECURSOR.                   | 20577                    | IPI00160421.3 | 8.333                          | 1                        |
| 39S RIBOSOMAL PROTEIN L32, MITOCHONDRIAL PRECURSOR.                   | 21405                    | IPI00011077.3 | 4.787                          | 1                        |
| 39S RIBOSOMAL PROTEIN L34, MITOCHONDRIAL PRECURSOR.                   | 10165                    | IPI00028390.1 | 14.13                          | 1                        |
| 39S RIBOSOMAL PROTEIN L44, MITOCHONDRIAL PRECURSOR.                   | 37535                    | IPI00009680.3 | 6.024                          | 1                        |
| 39S RIBOSOMAL PROTEIN L9, MITOCHONDRIAL PRECURSOR.                    | 30185                    | IPI00307409.5 | 10.112                         | 1                        |
| 41 KDA PROTEIN.                                                       | 40503                    | IPI00333470.1 | 2.997                          | 1                        |
| 43 KDA PROTEIN.                                                       | 42826                    | IPI00396468.2 | 5.013                          | 1                        |
| 44 KDA PROTEIN.                                                       | 43896                    | IPI00385664.1 | 3.646                          | 1                        |
| 44 KDA PROTEIN.                                                       | 44198                    | IPI00412760.1 | 6.965                          | 1                        |
| 47 KDA PROTEIN.                                                       | 47056                    | IPI00249567.4 | 4.524                          | 1                        |
| 48 KDA PROTEIN.                                                       | 47581                    | IPI00054022.4 | 3.488                          | 1                        |

| Protein Description                                        | Molecular Weight<br>(Da) | IPI Number    | Total Sequence<br>Coverage (%) | Total Unique<br>Peptides |
|------------------------------------------------------------|--------------------------|---------------|--------------------------------|--------------------------|
| 48 KDA PROTEIN.                                            | 48426                    | IPI00332128.1 | 5.057                          | 1                        |
| 49 KDA PROTEIN.                                            | 48913                    | IPI00058961.4 | 7.534                          | 1                        |
| 50 KDA PROTEIN.                                            | 50171                    | IPI00396485.2 | 2.412                          | 1                        |
| 5'-AMP-ACTIVATED PROTEIN KINASE, BETA-1 SUBUNIT.           | 30251                    | IPI00220409.2 | 5.948                          | 1                        |
| 5T4 ONCOFOETAL ANTIGEN PRECURSOR.                          | 46032                    | IPI00009111.1 | 3.333                          | 1                        |
| 60 KDA PROTEIN.                                            | 60390                    | IPI00053288.3 | 3.27                           | 1                        |
| 60 KDA PROTEIN.                                            | 60309                    | IPI00220480.6 | 3.559                          | 1                        |
| 60 KDA PROTEIN.                                            | 59779                    | IPI00479797.1 | 4.938                          | 1                        |
| 60S RIBOSOMAL PROTEIN L26-LIKE 1.                          | 17256                    | IPI00007144.1 | 6.897                          | 1                        |
| 72 KDA TYPE IV COLLAGENASE PRECURSOR.                      | 73882                    | IPI00027780.1 | 2.879                          | 1                        |
| 75 KDA PROTEIN.                                            | 75354                    | IPI00477967.1 | 1.534                          | 1                        |
| 7-DEHYDROCHOLESTEROL REDUCTASE.                            | 54489                    | IPI00294501.1 | 1.684                          | 1                        |
| 83 KDA PROTEIN.                                            | 82586                    | IPI00374161.2 | 1.374                          | 1                        |
| 84 KDA PROTEIN.                                            | 83982                    | IPI00006140.2 | 1.091                          | 1                        |
| AAVG5835.                                                  | 18903                    | IPI00419626.1 | 10.366                         | 1                        |
| ACBD6 PROTEIN.                                             | 31151                    | IPI00031680.3 | 12.057                         | 1                        |
| ACHALASIA VARIANT.                                         | 55814                    | IPI00024143.3 | 3.704                          | 1                        |
| ACID SPHINGOMYELINASE-LIKE PHOSPHODIESTERASE 3A PRECURSOR. | 51260                    | IPI00178767.1 | 6.402                          | 1                        |
| ACPP PROTEIN.                                              | 48308                    | IPI00289983.1 | 3.828                          | 1                        |
| ACTIN BINDING PROTEIN ANILLIN.                             | 124278                   | IPI00032958.1 | 1.511                          | 1                        |
| AD-018 PROTEIN.                                            | 27373                    | IPI00006419.4 | 7.819                          | 1                        |
| AD039.                                                     | 24178                    | IPI00015351.1 | 10.9                           | 1                        |
| AD24.                                                      | 92548                    | IPI00102815.1 | 1.375                          | 1                        |
| ADAMTSL2 PROTEIN.                                          | 104621                   | IPI00413269.4 | 1.893                          | 1                        |
| ADAPTER-RELATED PROTEIN COMPLEX 3 BETA 2 SUBUNIT.          | 119059                   | IPI00005793.2 | 1.571                          | 1                        |
| ADAPTOR PROTEIN KANADAPTIN.                                | 88814                    | IPI00306749.4 | 1.508                          | 1                        |
| ADP-RIBOSYLATION FACTOR 6.                                 | 19951                    | IPI00215920.5 | 8.621                          | 1                        |
| ADRENODOXIN, MITOCHONDRIAL PRECURSOR.                      | 19393                    | IPI00019326.1 | 9.239                          | 1                        |
| AF5Q31 PROTEIN.                                            | 127459                   | IPI00004344.1 | 1.29                           | 1                        |
| ALDEHYDE OXIDASE.                                          | 147931                   | IPI00029715.3 | 1.345                          | 1                        |
| ALPHA-1,3.                                                 | 15668                    | IPI00061448.4 | 8.571                          | 1                        |
| ALPHA-1-ACID GLYCOPROTEIN 1 PRECURSOR.                     | 23512                    | IPI00022429.3 | 7.463                          | 1                        |
| ALPHA-1B-GLYCOPROTEIN PRECURSOR.                           | 54273                    | IPI00022895.5 | 5.657                          | 1                        |
| ALPHA-2-HS-GLYCOPROTEIN PRECURSOR.                         | 39325                    | IPI00022431.1 | 2.725                          | 1                        |
| ALPHA-ACTININ 3.                                           | 103294                   | IPI00032137.1 | 1.665                          | 1                        |

| Protein Description                                               | Molecular Weight<br>(Da) | IPI Number    | Total Sequence<br>Coverage (%) | Total Unique<br>Peptides |
|-------------------------------------------------------------------|--------------------------|---------------|--------------------------------|--------------------------|
| ALPHA-AMINOADIPIC SEMIALDEHYDE SYNTHASE, MITOCHONDRIAL PRECURSOR. | 102132                   | IPI00033217.1 | 0.972                          | 1                        |
| ALPHA-GALACTOSIDASE A PRECURSOR.                                  | 48767                    | IPI00025869.1 | 1.632                          | 1                        |
| ALPHA-MANNOSIDASE 2C1.                                            | 115903                   | IPI00220817.7 | 2.305                          | 1                        |
| ALPHA-METHYLACYL-COA RACEMASE.                                    | 42360                    | IPI00005918.1 | 5.236                          | 1                        |
| ALPHA-SOLUBLE NSF ATTACHMENT PROTEIN.                             | 33221                    | IPI00420053.2 | 6.441                          | 1                        |
| AMID PROTEIN.                                                     | 40527                    | IPI00013909.1 | 4.558                          | 1                        |
| AMYLOID-LIKE PROTEIN 1 PRECURSOR.                                 | 72176                    | IPI00020012.2 | 3.385                          | 1                        |
| ANCHOR ATTACHMENT PROTEIN 1 .                                     | 67657                    | IPI00021594.2 | 2.087                          | 1                        |
| ANGIOGENIN PRECURSOR.                                             | 16550                    | IPI00008554.1 | 10.884                         | 1                        |
| ANGIOTENSIN II RECEPTOR-ASSOCIATED PROTEIN.                       | 17419                    | IPI00102501.3 | 13.836                         | 1                        |
| ANKYRIN REPEAT AND MYND DOMAIN CONTAINING 2.                      | 49299                    | IPI00216856.1 | 6.803                          | 1                        |
| ANKYRIN REPEAT AND SAM DOMAIN-CONTAINING PROTEIN 1.               | 122977                   | IPI00395663.4 | 1.942                          | 1                        |
| ANTIGEN MLAA-39.                                                  | 15102                    | IPI00447173.1 | 10.156                         | 1                        |
| APG12 AUTOPHAGY 12-LIKE .                                         | 20632                    | IPI00005881.2 | 20.321                         | 1                        |
| APOLIPOPROTEIN A-II PRECURSOR.                                    | 11175                    | IPI00021854.1 | 11                             | 1                        |
| APOLIPOPROTEIN C-III PRECURSOR.                                   | 10852                    | IPI00021857.1 | 16.162                         | 1                        |
| AQUARIUS .                                                        | 171295                   | IPI00297572.4 | 0.875                          | 1                        |
| ARGININE-GLUTAMIC ACID DIPEPTIDE (RE) REPEATS.                    | 172424                   | IPI00185027.4 | 1.724                          | 1                        |
| ARIADNE-1 PROTEIN HOMOLOG.                                        | 64118                    | IPI00294943.1 | 2.154                          | 1                        |
| ARL6IP2.                                                          | 66199                    | IPI00169267.1 | 2.058                          | 1                        |
| AROMATIC-L-AMINO-ACID DECARBOXYLASE.                              | 53894                    | IPI00025394.1 | 2.708                          | 1                        |
| ARRESTIN-C.                                                       | 42752                    | IPI00003917.9 | 3.866                          | 1                        |
| ART-4 PROTEIN.                                                    | 46675                    | IPI00022373.1 | 7.524                          | 1                        |
| ARYLSULFATASE B PRECURSOR.                                        | 59687                    | IPI00306576.1 | 2.439                          | 1                        |
| ASPARAGINASE-LIKE PROTEIN.                                        | 32085                    | IPI00169322.6 | 3.247                          | 1                        |
| AT RICH INTERACTIVE DOMAIN 2 (ARID, RFX-LIKE) .                   | 197391                   | IPI00470537.2 | 1.253                          | 1                        |
| AT RICH INTERACTIVE DOMAIN 4B.                                    | 137607                   | IPI00302917.4 | 2.202                          | 1                        |
| ATLASTIN.                                                         | 63544                    | IPI00103530.1 | 1.792                          | 1                        |
| ATP SYNTHASE EPSILON CHAIN, MITOCHONDRIAL.                        | 5649                     | IPI00215878.5 | 26                             | 1                        |
| ATP SYNTHASE F0 SUBUNIT 8.                                        | 8002                     | IPI00008528.3 | 16.176                         | 1                        |
| ATP SYNTHASE LIPID-BINDING PROTEIN, MITOCHONDRIAL PRECURSOR.      | 14693                    | IPI00008727.1 | 4.93                           | 1                        |
| ATP-BINDING CASSETTE SUB-FAMILY A MEMBER 2.                       | 269958                   | IPI00307592.3 | 0.575                          | 1                        |
| ATP-BINDING CASSETTE, SUB-FAMILY C (CFTRV/MRP), MEMBER 10.        | 161629                   | IPI00168635.2 | 1.072                          | 1                        |
| ATP-BINDING CASSETTE, SUB-FAMILY C, MEMBER 8 .                    | 176998                   | IPI00219696.2 | 0.696                          | 1                        |

| Protein Description                                                                              | Molecular Weight<br>(Da) | IPI Number    | Total Sequence<br>Coverage (%) | Total Unique<br>Peptides |
|--------------------------------------------------------------------------------------------------|--------------------------|---------------|--------------------------------|--------------------------|
| ATP-BINDING CASSETTE, SUB-FAMILY D, MEMBER 1.                                                    | 82909                    | IPI00291373.1 | 1.879                          | 1                        |
| ATROPHIN-1.                                                                                      | 125542                   | IPI00005502.3 | 2.267                          | 1                        |
| AXIN-1.                                                                                          | 95635                    | IPI00005188.2 | 2.088                          | 1                        |
| B7-H3 PROTEIN.                                                                                   | 57235                    | IPI00410488.2 | 1.873                          | 1                        |
| BACULOVIRAL IAP REPEAT-CONTAINING PROTEIN 1.                                                     | 159614                   | IPI00011547.1 | 1.14                           | 1                        |
| BACULOVIRAL IAP REPEAT-CONTAINING PROTEIN 4.                                                     | 56685                    | IPI00303890.1 | 3.622                          | 1                        |
| BAP2-BETA PROTEIN.                                                                               | 57445                    | IPI00180292.5 | 1.923                          | 1                        |
| BARDET-BIEDL SYNDROME 4 PROTEIN.                                                                 | 58270                    | IPI00290189.1 | 6.744                          | 1                        |
| BASIC HELIX-LOOP-HELIX PROTEIN MIST1.                                                            | 20818                    | IPI00219822.1 | 14.286                         | 1                        |
| BASSOON PROTEIN.                                                                                 | 416368                   | IPI00020153.2 | 0.28                           | 1                        |
| BCCIP PROTEIN.                                                                                   | 36052                    | IPI00002203.4 | 9.873                          | 1                        |
| B-CELL RECEPTOR-ASSOCIATED PROTEIN 29.                                                           | 28320                    | IPI00221233.4 | 8.714                          | 1                        |
| BCL2/ADENOVIRUS E1B 19-KDA PROTEIN-INTERACTING PROTEIN 3.                                        | 21541                    | IPI00290409.3 | 5.67                           | 1                        |
| BCL2-ANTAGONIST OF CELL DEATH.                                                                   | 18392                    | IPI00024291.2 | 18.452                         | 1                        |
| BCNT PROTEIN.                                                                                    | 33593                    | IPI00007306.1 | 6.02                           | 1                        |
| BET1 HOMOLOG.                                                                                    | 13289                    | IPI00025163.1 | 12.712                         | 1                        |
| BETA-1,3-GALACTOSYL-O-GLYCOSYL-GLYCOPROTEIN BETA-1,6-N-<br>ACETYLGLUCOSAMINYLTRANSFERASE.        | 49785                    | IPI00295368.1 | 3.037                          | 1                        |
| BETA-1,4 N-ACETYLGLACTOSAMINYLTRANSFERASE.                                                       | 58882                    | IPI00025473.1 | 2.251                          | 1                        |
| BETA-1,4-GALACTOSYLTRANSFERASE 3.                                                                | 43986                    | IPI00021551.2 | 3.053                          | 1                        |
| BETA-1,4-MANNOSYLTRANSFERASE.                                                                    | 52564                    | IPI00297147.3 | 1.94                           | 1                        |
| BETA-2-GLYCOPROTEIN I PRECURSOR.                                                                 | 38298                    | IPI00298828.1 | 2.609                          | 1                        |
| BETA-ADRENERGIC RECEPTOR KINASE 1.                                                               | 79668                    | IPI00012497.1 | 1.742                          | 1                        |
| BETA-SOLUBLE NSF ATTACHMENT PROTEIN.                                                             | 33557                    | IPI00021835.1 | 4.027                          | 1                        |
| BIFUNCTIONAL METHYLENETETRAHYDROFOLATE<br>DEHYDROGENASE/CYCLOHYDROLASE, MITOCHONDRIAL PRECURSOR. | 37320                    | IPI00011307.1 | 6.395                          | 1                        |
| BIFUNCTIONAL UDP-N-ACETYLGLUCOSAMINE 2-EPIMERASE/N-<br>ACETYLMANNOSAMINE KINASE.                 | 79275                    | IPI00023162.1 | 1.939                          | 1                        |
| BIOGENESIS OF LYSOSOME-RELATED ORGANELLES COMPLEX-1, SUBUNIT 1.                                  | 14311                    | IPI00020319.1 | 21.6                           | 1                        |
| BISPHOSPHOGLYCERATE MUTASE.                                                                      | 29874                    | IPI00215979.2 | 3.876                          | 1                        |
| BLOC1S2 PROTEIN.                                                                                 | 11489                    | IPI00163483.3 | 29.293                         | 1                        |
| BRAIN PROTEIN 16.                                                                                | 42129                    | IPI00009335.1 | 6.41                           | 1                        |
| BRAIN-SPECIFIC ANGIOGENESIS INHIBITOR 1 PRECURSOR.                                               | 173533                   | IPI00022333.1 | 1.389                          | 1                        |
| BRANCHED-CHAIN-AMINO-ACID AMINOTRANSFERASE, CYTOSOLIC.                                           | 42952                    | IPI00382412.3 | 3.368                          | 1                        |

| Protein Description                                                     | Molecular Weight<br>(Da) | IPI Number    | Total Sequence<br>Coverage (%) | Total Unique<br>Peptides |
|-------------------------------------------------------------------------|--------------------------|---------------|--------------------------------|--------------------------|
| BRCA1-ASSOCIATED PROTEIN.                                               | 67291                    | IPI00396089.1 | 1.689                          | 1                        |
| BRD9 PROTEIN.                                                           | 53249                    | IPI00374268.4 | 3.534                          | 1                        |
| BROMODOMAIN PROTEIN CELTIX1.                                            | 74084                    | IPI00001707.3 | 1.84                           | 1                        |
| BROMODOMAIN-CONTAINING PROTEIN 2.                                       | 88061                    | IPI00014414.1 | 2.247                          | 1                        |
| BUTYRATE RESPONSE FACTOR 1.                                             | 36314                    | IPI00016635.1 | 6.213                          | 1                        |
| BYSL PROTEIN.                                                           | 49601                    | IPI00328987.1 | 4.577                          | 1                        |
| C13ORF10 PROTEIN.                                                       | 110666                   | IPI00329545.4 | 1.429                          | 1                        |
| C14ORF160 PROTEIN.                                                      | 48548                    | IPI00029239.1 | 2.721                          | 1                        |
| C2ORF32 PROTEIN.                                                        | 18648                    | IPI00073958.1 | 14.024                         | 1                        |
| C316G12.3.                                                              | 33974                    | IPI00000137.1 | 12.787                         | 1                        |
| C5ORF19 PROTEIN.                                                        | 28261                    | IPI00009905.6 | 9.524                          | 1                        |
| C6ORF79 PROTEIN.                                                        | 39694                    | IPI00152975.3 | 2.786                          | 1                        |
| C9ORF89 PROTEIN.                                                        | 20626                    | IPI00177808.9 | 6.011                          | 1                        |
| CALCIUM-SIGNAL MODULATING CYCLOPHILIN LIGAND.                           | 32953                    | IPI00025729.1 | 3.041                          | 1                        |
| CALGRANULIN B.                                                          | 13242                    | IPI00027462.1 | 13.158                         | 1                        |
| CALMODULIN REGULATED SPECTRIN-ASSOCIATED PROTEIN 1.                     | 146253                   | IPI00395444.5 | 0.979                          | 1                        |
| CALPAIN 7.                                                              | 92652                    | IPI00003765.1 | 1.722                          | 1                        |
| CAMP-DEPENDENT PROTEIN KINASE INHIBITOR, GAMMA FORM.                    | 7910                     | IPI00032010.1 | 21.053                         | 1                        |
| CAMP-DEPENDENT PROTEIN KINASE TYPE I-BETA REGULATORY CHAIN.             | 43057                    | IPI00375453.3 | 4.462                          | 1                        |
| CANDIDATE TUMOR SUPPRESSOR PROTEIN DICE1.                               | 100390                   | IPI00015922.1 | 1.691                          | 1                        |
| CANT1 PROTEIN.                                                          | 44840                    | IPI00103175.1 | 8.479                          | 1                        |
| CAP-GLY DOMAIN CONTAINING PROTEIN.                                      | 57775                    | IPI00021612.4 | 2.344                          | 1                        |
| CARBONIC ANHYDRASE IX PRECURSOR.                                        | 49730                    | IPI00003966.1 | 3.268                          | 1                        |
| CARBONIC ANHYDRASE-RELATED PROTEIN.                                     | 32842                    | IPI00219669.4 | 8.651                          | 1                        |
| CARCINOEMBRYONIC ANTIGEN-RELATED CELL ADHESION MOLECULE 5<br>PRECURSOR. | 76796                    | IPI00027486.1 | 3.704                          | 1                        |
| CARTILAGE INTERMEDIATE LAYER PROTEIN-LIKE PROTEIN CLIP-2.               | 126277                   | IPI00216780.1 | 1.903                          | 1                        |
| CASEIN KINASE I, EPSILON ISOFORM.                                       | 47315                    | IPI00027729.1 | 2.163                          | 1                        |
| CASP10 PROTEIN.                                                         | 58994                    | IPI00292650.3 | 2.682                          | 1                        |
| CASPASE-3 PRECURSOR.                                                    | 31594                    | IPI00292140.3 | 3.61                           | 1                        |
| CASPASE-4 PRECURSOR.                                                    | 43262                    | IPI00027725.1 | 2.918                          | 1                        |
| CATECHOL-O-METHYLTRANSFERASE DOMAIN CONTAINING 1.                       | 28809                    | IPI00328988.3 | 6.489                          | 1                        |
| CATHEPSIN G PRECURSOR.                                                  | 28837                    | IPI00028064.1 | 3.922                          | 1                        |
| CCR4-NOT TRANSCRIPTION COMPLEX SUBUNIT 7.                               | 32745                    | IPI00006552.2 | 7.018                          | 1                        |
| CD19.                                                                   | 61088                    | IPI00305031.3 | 1.619                          | 1                        |

| Protein Description                                                     | Molecular Weight<br>(Da) | IPI Number    | Total Sequence<br>Coverage (%) | Total Unique<br>Peptides |
|-------------------------------------------------------------------------|--------------------------|---------------|--------------------------------|--------------------------|
| CDC42 EFFECTOR PROTEIN 4.                                               | 37980                    | IPI00015894.1 | 8.427                          | 1                        |
| CDC42 EFFECTOR PROTEIN 5.                                               | 15207                    | IPI00290570.2 | 6.757                          | 1                        |
| CELL CYCLE RELATED KINASE.                                              | 49711                    | IPI00015892.1 | 3.54                           | 1                        |
| CELL DIVISION CYCLE 2-LIKE 5.                                           | 164923                   | IPI00456970.1 | 1.521                          | 1                        |
| CELL DIVISION CYCLE 2-RELATED PROTEIN KINASE 7.                         | 164155                   | IPI00021175.1 | 1.812                          | 1                        |
| CELL DIVISION PROTEIN KINASE 2.                                         | 33930                    | IPI00031681.1 | 6.711                          | 1                        |
| CELL DIVISION PROTEIN KINASE 4.                                         | 33730                    | IPI00007811.1 | 3.96                           | 1                        |
| CELL DIVISION PROTEIN KINASE 9.                                         | 42792                    | IPI00301923.3 | 6.183                          | 1                        |
| CENTAURIN BETA 2.                                                       | 88029                    | IPI00014264.5 | 3.985                          | 1                        |
| CENTAURIN GAMMA 1.                                                      | 90537                    | IPI00015401.1 | 3.947                          | 1                        |
| CENTROSOMAL COLON CANCER AUTOANTIGEN PROTEIN.                           | 82682                    | IPI00186006.3 | 2.384                          | 1                        |
| CERAMIDE KINASE.                                                        | 59977                    | IPI00152433.3 | 1.862                          | 1                        |
| CEROID-LIPOFUSCINOSIS NEURONAL PROTEIN 6.                               | 35919                    | IPI00016597.3 | 3.537                          | 1                        |
| CG9886-LIKE.                                                            | 55253                    | IPI00217117.1 | 4.971                          | 1                        |
| CGI-43 PROTEIN.                                                         | 56197                    | IPI00098660.1 | 2.899                          | 1                        |
| CGI-77 PROTEIN.                                                         | 33813                    | IPI00182180.1 | 4.778                          | 1                        |
| CGI-83 PROTEIN.                                                         | 32806                    | IPI00006952.1 | 6.944                          | 1                        |
| CGI-84 PROTEIN.                                                         | 23907                    | IPI00550181.2 | 6.103                          | 1                        |
| CHARGED MULTIVESICULAR BODY PROTEIN 1/CHROMATIN MODIFYING<br>PROTEIN 1. | 21703                    | IPI00382452.1 | 5.102                          | 1                        |
| CHLORIDE CHANNEL PROTEIN 3.                                             | 90966                    | IPI00298889.3 | 1.345                          | 1                        |
| CHONDROITIN SULFATE SYNTHASE 2.                                         | 85495                    | IPI00465319.3 | 1.419                          | 1                        |
| CHROMATIN ASSEMBLY FACTOR 1, SUBUNIT A.                                 | 106910                   | IPI00023177.2 | 1.36                           | 1                        |
| CHROMOBOX PROTEIN HOMOLOG 8.                                            | 43438                    | IPI00307659.1 | 2.571                          | 1                        |
| CHROMODOMAIN HELICASE DNA BINDING PROTEIN 7 .                           | 335927                   | IPI00472901.2 | 0.267                          | 1                        |
| CHROMODOMAIN Y-LIKE PROTEIN 2.                                          | 56500                    | IPI00178475.9 | 7.905                          | 1                        |
| CHROMODOMAIN Y-LIKE PROTEIN.                                            | 66420                    | IPI00293963.3 | 2.174                          | 1                        |
| CHROMOSOME 1 OPEN READING FRAME 22.                                     | 104664                   | IPI00009410.2 | 1.717                          | 1                        |
| CHROMOSOME 1 OPEN READING FRAME 27.                                     | 51103                    | IPI00386043.2 | 2.203                          | 1                        |
| CHROMOSOME 1 OPEN READING FRAME 34.                                     | 46394                    | IPI00023920.2 | 2.857                          | 1                        |
| CHROMOSOME 10 OPEN READING FRAME 74.                                    | 29264                    | IPI00164434.5 | 3.922                          | 1                        |
| CHROMOSOME 12 OPEN READING FRAME 11.                                    | 80225                    | IPI00305901.1 | 3.116                          | 1                        |
| CHROMOSOME 14 OPEN READING FRAME 35 .                                   | 39243                    | IPI00219068.2 | 5.249                          | 1                        |
| CHROMOSOME 18 OPEN READING FRAME 25.                                    | 43395                    | IPI00059687.1 | 2.723                          | 1                        |
| CHROMOSOME 19 OPEN READING FRAME 21.                                    | 75357                    | IPI00217121.1 | 3.976                          | 1                        |

| Protein Description                                                     | Molecular Weight<br>(Da) | IPI Number    | Total Sequence<br>Coverage (%) | Total Unique<br>Peptides |
|-------------------------------------------------------------------------|--------------------------|---------------|--------------------------------|--------------------------|
| CHROMOSOME 19 OPEN READING FRAME 32.                                    | 20733                    | IPI00063220.3 | 7.065                          | 1                        |
| CHROMOSOME 2 OPEN READING FRAME 3.                                      | 89359                    | IPI00418340.1 | 2.305                          | 1                        |
| CHROMOSOME 5 OPEN READING FRAME 14.                                     | 39885                    | IPI00151990.2 | 3.889                          | 1                        |
| CHROMOSOME 9 OPEN READING FRAME 114.                                    | 42064                    | IPI00099055.3 | 5.319                          | 1                        |
| CHROMOSOME 9 OPEN READING FRAME 115.                                    | 22937                    | IPI00048572.2 | 15.888                         | 1                        |
| CHROMOSOME 9 OPEN READING FRAME 42.                                     | 30529                    | IPI00061087.3 | 3.833                          | 1                        |
| CHROMOSOME 9 OPEN READING FRAME 55.                                     | 180883                   | IPI00100453.5 | 1.667                          | 1                        |
| CHRONIC MYELOGENOUS LEUKEMIA TUMOR ANTIGEN 66.                          | 66776                    | IPI00306398.5 | 3.602                          | 1                        |
| CMP-N-ACETYLNEURAMINATE-BETA-GALACTOSAMIDE-ALPHA-2,3-SIALYLTRANSFERASE. | 39075                    | IPI00009629.1 | 3.529                          | 1                        |
| C-MYC PROMOTER-BINDING PROTEIN IRLB.                                    | 209569                   | IPI00396063.3 | 0.804                          | 1                        |
| COAGULATION FACTOR XIII A CHAIN PRECURSOR.                              | 83136                    | IPI00297550.7 | 2.326                          | 1                        |
| COHESIN SUBUNIT SA-1.                                                   | 144445                   | IPI00025158.1 | 0.874                          | 1                        |
| COILED-COIL DOMAIN CONTAINING PROTEIN 8.                                | 59402                    | IPI00290526.6 | 2.045                          | 1                        |
| COL6A2 PROTEIN.                                                         | 25036                    | IPI00453217.1 | 12.335                         | 1                        |
| COLORECTAL MUTANT CANCER PROTEIN.                                       | 93055                    | IPI00011957.1 | 1.206                          | 1                        |
| COMM DOMAIN CONTAINING PROTEIN 3.                                       | 22151                    | IPI00015773.3 | 6.154                          | 1                        |
| COMM DOMAIN CONTAINING PROTEIN 5.                                       | 24670                    | IPI00101106.3 | 4.911                          | 1                        |
| COMM DOMAIN CONTAINING PROTEIN 8.                                       | 21090                    | IPI00016447.3 | 8.197                          | 1                        |
| COMPLEMENT C1Q TUMOR NECROSIS FACTOR-RELATED PROTEIN 5 PRECURSOR.       | 25298                    | IPI00024105.1 | 6.996                          | 1                        |
| COMPLEMENT C1S SUBCOMPONENT PRECURSOR.                                  | 76684                    | IPI00017696.1 | 1.599                          | 1                        |
| COMPLEXIN 1.                                                            | 15030                    | IPI00396023.1 | 17.91                          | 1                        |
| CONSERVED HYPOTHETICAL PROTEIN.                                         | 38724                    | IPI00032939.7 | 3.209                          | 1                        |
| CONSERVED HYPOTHETICAL PROTEIN.                                         | 39066                    | IPI00178611.3 | 4.167                          | 1                        |
| CONSERVED HYPOTHETICAL PROTEIN.                                         | 54777                    | IPI00180781.3 | 1.477                          | 1                        |
| CONSERVED OLIGOMERIC GOLGI COMPLEX COMPONENT 3.                         | 94080                    | IPI00414858.1 | 2.295                          | 1                        |
| CONSERVED OLIGOMERIC GOLGI COMPLEX COMPONENT 8.                         | 68452                    | IPI00140201.3 | 3.595                          | 1                        |
| CORE 2/CORE 4 BETA-1,6-N-ACETYLGLUCOSAMINYLTRANSFERASE.                 | 50864                    | IPI00006248.1 | 5.479                          | 1                        |
| CORE BINDING FACTOR BETA ISOFORM PEBP2B.                                | 21991                    | IPI00024871.1 | 4.813                          | 1                        |
| CORNEODESMOSIN.                                                         | 51479                    | IPI00386809.1 | 5.482                          | 1                        |
| CORONIN-2B.                                                             | 54393                    | IPI00298912.4 | 2.316                          | 1                        |
| CTL2 GENE.                                                              | 80136                    | IPI00549521.2 | 2.408                          | 1                        |
| CUGBP2 PROTEIN.                                                         | 55754                    | IPI00410277.1 | 2.687                          | 1                        |
| CULLIN 2.                                                               | 82359                    | IPI00014311.3 | 2.266                          | 1                        |

| Protein Description                                                     | Molecular Weight<br>(Da) | IPI Number    | Total Sequence<br>Coverage (%) | Total Unique<br>Peptides |
|-------------------------------------------------------------------------|--------------------------|---------------|--------------------------------|--------------------------|
| CWF19-LIKE 1, CELL CYCLE CONTROL.                                       | 60647                    | IPI00101600.3 | 2.602                          | 1                        |
| CYCLIN FOLD PROTEIN 1 VARIANT A.                                        | 36404                    | IPI00334743.3 | 4.747                          | 1                        |
| CYCLIN L GAMMA.                                                         | 18322                    | IPI00186287.2 | 6.977                          | 1                        |
| CYCLIN-DEPENDENT KINASE 6 INHIBITOR.                                    | 18127                    | IPI00001564.1 | 6.548                          | 1                        |
| CYP51A1 PROTEIN.                                                        | 57264                    | IPI00295772.4 | 1.768                          | 1                        |
| CYTOCHROME B-245 HEAVY CHAIN.                                           | 65205                    | IPI00218646.2 | 1.933                          | 1                        |
| CYTOCHROME B-245 LIGHT CHAIN.                                           | 20827                    | IPI00218433.4 | 15.979                         | 1                        |
| CYTOCHROME B561.                                                        | 27559                    | IPI00027144.4 | 4.382                          | 1                        |
| CYTOCHROME C OXIDASE POLYPEPTIDE VIA-LIVER, MITOCHONDRIAL<br>PRECURSOR. | 12155                    | IPI00021793.1 | 26.606                         | 1                        |
| CYTOCHROME C OXIDASE SUBUNIT 3.                                         | 29951                    | IPI00017533.1 | 5.364                          | 1                        |
| CYTOCHROME C-TYPE HEME LYASE.                                           | 30602                    | IPI00023406.1 | 3.358                          | 1                        |
| CYTOCHROME P450 2J2.                                                    | 57611                    | IPI00019411.2 | 1.992                          | 1                        |
| CYTOCHROME P450 3A5.                                                    | 57109                    | IPI00025831.1 | 3.386                          | 1                        |
| CYTOGLOBIN.                                                             | 21405                    | IPI00103373.1 | 14.211                         | 1                        |
| CYTOPLASMIC DYNEIN LIGHT CHAIN.                                         | 12452                    | IPI00019495.1 | 15.929                         | 1                        |
| CYTOSKELETON ASSOCIATED PROTEIN 2.                                      | 76987                    | IPI00071824.2 | 3.075                          | 1                        |
| CYTOSOLIC IRON-SULFUR CLUSTER SCAFFOLD PROTEIN NFU.                     | 25924                    | IPI00160021.2 | 10.87                          | 1                        |
| CYTOSOLIC PHOSPHOLIPASE A2.                                             | 85211                    | IPI00026108.1 | 1.202                          | 1                        |
| DAB2 INTERACTING PROTEIN.                                               | 128384                   | IPI00045600.2 | 2.328                          | 1                        |
| DC2.                                                                    | 16829                    | IPI00183603.3 | 8.054                          | 1                        |
| DEAD-BOX PROTEIN 47.                                                    | 50647                    | IPI00023972.3 | 2.418                          | 1                        |
| DEAD-BOX PROTEIN 54.                                                    | 98666                    | IPI00152510.1 | 1.361                          | 1                        |
| DEAH (ASP-GLU-ALA-ASP/HIS) BOX POLYPEPTIDE 57 ISOFORM 1 .               | 155604                   | IPI00395595.1 | 1.01                           | 1                        |
| DEATH-ASSOCIATED PROTEIN KINASE 1.                                      | 160221                   | IPI00021250.2 | 0.559                          | 1                        |
| DEATH-ASSOCIATED PROTEIN KINASE 3.                                      | 52536                    | IPI00015213.1 | 4.846                          | 1                        |
| DEDICATOR OF CYTOKINESIS PROTEIN 1.                                     | 215376                   | IPI00015286.1 | 0.697                          | 1                        |
| DEFENDER AGAINST CELL DEATH 1.                                          | 12366                    | IPI00009407.4 | 10.714                         | 1                        |
| DELTA 4 PROGESTERONE RECEPTOR.                                          | 87747                    | IPI00152591.1 | 1.444                          | 1                        |
| DENDRITIC CELL-DERIVED UBIQUITIN-LIKE PROTEIN.                          | 21548                    | IPI00157729.3 | 7.368                          | 1                        |
| DEOXYRIBONUCLEASE II ALPHA PRECURSOR.                                   | 39581                    | IPI00010348.1 | 3.333                          | 1                        |
| DERLIN-2.                                                               | 27567                    | IPI00304264.3 | 12.552                         | 1                        |
| DESMOPLAKIN ISOFORM II .                                                | 260119                   | IPI00217182.2 | 0.836                          | 1                        |
| DIACYLGLYCEROL KINASE, ALPHA.                                           | 82672                    | IPI00333143.3 | 2.449                          | 1                        |
| DIAPHANOUS HOMOLOG 3 (FRAGMENT).                                        | 82585                    | IPI00178670.3 | 4.011                          | 1                        |



| Protein Description                                                          | Molecular Weight<br>(Da) | IPI Number    | Total Sequence<br>Coverage (%) | Total Unique<br>Peptides |
|------------------------------------------------------------------------------|--------------------------|---------------|--------------------------------|--------------------------|
| DIMERIZATION COFACTOR OF HEPATOCYTE NUCLEAR FACTOR 1 (HNF1)<br>FROM MUSCLE . | 14365                    | IPI00329646.4 | 10                             | 1                        |
| DIPEPTIDYL-PEPTIDASE I PRECURSOR.                                            | 51842                    | IPI00022810.1 | 2.592                          | 1                        |
| DIPHOSPHOINOSITOL POLYPHOSPHATE PHOSPHOHYDROLASE TYPE 2 BETA.                | 20434                    | IPI00021408.1 | 13.26                          | 1                        |
| DIPHOSPHOINOSITOL POLYPHOSPHATE PHOSPHOHYDROLASE.                            | 19471                    | IPI00009148.1 | 9.884                          | 1                        |
| DIPHTHAMIDE BIOSYNTHESIS-LIKE PROTEIN 2, ISOFORM A.                          | 52083                    | IPI00106549.1 | 3.885                          | 1                        |
| DKFZP434B168 PROTEIN.                                                        | 106853                   | IPI00384267.1 | 1.663                          | 1                        |
| DKFZP434K1421 PROTEIN.                                                       | 66318                    | IPI00030274.3 | 2.509                          | 1                        |
| DKFZP564C186 PROTEIN (FRAGMENT).                                             | 17438                    | IPI00382662.1 | 7.927                          | 1                        |
| DKFZP564D172 PROTEIN.                                                        | 47972                    | IPI00102909.1 | 4.087                          | 1                        |
| DNA METHYLTRANSFERASE 1-ASSOCIATED PROTEIN 1.                                | 53462                    | IPI00219919.1 | 2.548                          | 1                        |
| DNA MISMATCH REPAIR PROTEIN MSH2.                                            | 104743                   | IPI00017303.1 | 1.499                          | 1                        |
| DNA POLYMERASE DELTA CATALYTIC SUBUNIT.                                      | 123631                   | IPI00002894.2 | 2.71                           | 1                        |
| DNA-DIRECTED RNA POLYMERASE I LARGEST SUBUNIT.                               | 194191                   | IPI00031960.1 | 0.582                          | 1                        |
| DNAJ HOMOLOG SUBFAMILY B MEMBER 9.                                           | 25518                    | IPI00017608.1 | 8.52                           | 1                        |
| DNAJ HOMOLOG SUBFAMILY C MEMBER 13.                                          | 185178                   | IPI00307259.7 | 0.554                          | 1                        |
| DNA-REPAIR PROTEIN COMPLEMENTING XP-G CELLS.                                 | 133329                   | IPI00477535.2 | 1.012                          | 1                        |
| DOUBLE-STRANDED RNA-BINDING ZINC FINGER PROTEIN JAZ.                         | 32933                    | IPI00017514.1 | 5.102                          | 1                        |
| DR1-ASSOCIATED PROTEIN 1 .                                                   | 22350                    | IPI00003084.1 | 5.366                          | 1                        |
| DUAL SPECIFICITY PROTEIN PHOSPHATASE 11.                                     | 38939                    | IPI00020683.3 | 3.939                          | 1                        |
| DYNACTIN 4.                                                                  | 52341                    | IPI00290465.1 | 2.391                          | 1                        |
| DYNAMIN 3 .                                                                  | 97095                    | IPI00221332.5 | 1.275                          | 1                        |
| DYSTROPHIN DP140BC ISOFORM .                                                 | 130765                   | IPI00184337.4 | 1.412                          | 1                        |
| E.                                                                           | 11529                    | IPI00024620.5 | 16.832                         | 1                        |
| E2IG2.                                                                       | 11309                    | IPI00009817.3 | 17.708                         | 1                        |
| E3 LIGASE FOR INHIBIN RECEPTOR.                                              | 289611                   | IPI00328911.1 | 0.459                          | 1                        |
| ECTONUCLEOSIDE TRIPHOSPHATE DIPHOSPHOHYDROLASE 3.                            | 59133                    | IPI00025297.1 | 2.079                          | 1                        |
| EEF1D PROTEIN.                                                               | 63452                    | IPI00064086.3 | 3.652                          | 1                        |
| EF-HAND CALCIUM BINDING PROTEIN 2.                                           | 43194                    | IPI00328122.1 | 4.404                          | 1                        |
| EGDC3042.                                                                    | 27724                    | IPI00045742.2 | 2.823                          | 1                        |
| EIF4EL3 PROTEIN.                                                             | 29402                    | IPI00006779.2 | 6.641                          | 1                        |
| ELG PROTEIN.                                                                 | 38920                    | IPI00032056.1 | 2.941                          | 1                        |
| ELONGATION OF VERY LONG CHAIN FATTY ACIDS PROTEIN 1.                         | 32663                    | IPI00010187.1 | 4.301                          | 1                        |
| ELONGATION PROTEIN 3 HOMOLOG.                                                | 62259                    | IPI00165477.5 | 3.473                          | 1                        |

| Protein Description                                   | Molecular Weight<br>(Da) | IPI Number    | Total Sequence<br>Coverage (%) | Total Unique<br>Peptides |
|-------------------------------------------------------|--------------------------|---------------|--------------------------------|--------------------------|
| ENDONUCLEASE G, MITOCHONDRIAL PRECURSOR.              | 32646                    | IPI00290614.5 | 3.367                          | 1                        |
| ENDOTHELIAL CELL ADHESION MOLECULE.                   | 41176                    | IPI00303161.3 | 7.436                          | 1                        |
| ENGULFMENT AND CELL MOTILITY PROTEIN 3.               | 68941                    | IPI00003033.3 | 4.942                          | 1                        |
| ENVOPLAKIN.                                           | 231618                   | IPI00023711.1 | 1.082                          | 1                        |
| EPHRIN TYPE-A RECEPTOR 4 PRECURSOR.                   | 109860                   | IPI00008318.1 | 3.144                          | 1                        |
| EPILEPSY HOLOPROSENCEPHALY CANDIDATE-1 PROTEIN.       | 142189                   | IPI00298870.1 | 2.065                          | 1                        |
| ESOPHAGEAL CANCER ASSOCIATED PROTEIN.                 | 93040                    | IPI00107728.3 | 1.23                           | 1                        |
| ESTRADIOL 17-BETA-DEHYDROGENASE 2.                    | 42785                    | IPI00019872.1 | 3.876                          | 1                        |
| ETOPOSIDE-INDUCED PROTEIN 2.4.                        | 40979                    | IPI00023185.1 | 2.228                          | 1                        |
| EUKARYOTIC PROTEIN KINASE FAMILY PROTEIN.             | 93725                    | IPI00062810.4 | 1.928                          | 1                        |
| EXOCYST COMPLEX COMPONENT SEC15A.                     | 93635                    | IPI00163337.6 | 1.493                          | 1                        |
| EXOPHILIN 5 .                                         | 222547                   | IPI00168769.6 | 0.754                          | 1                        |
| EXOSOME COMPLEX EXONUCLEASE RRP40.                    | 29572                    | IPI00015956.1 | 5.818                          | 1                        |
| EXOSOME COMPLEX EXONUCLEASE RRP41.                    | 26252                    | IPI00218310.3 | 4.918                          | 1                        |
| EXPORTIN 7.                                           | 123907                   | IPI00302458.8 | 1.012                          | 1                        |
| EXPRESSED IN HEMATOPOIETIC CELLS, HEART, LIVER.       | 92513                    | IPI00396010.3 | 1.227                          | 1                        |
| EXTRACELLULAR SUPEROXIDE DISMUTASE [CU-ZN] PRECURSOR. | 25881                    | IPI00027827.1 | 6.667                          | 1                        |
| FADD PROTEIN.                                         | 23279                    | IPI00011919.1 | 8.173                          | 1                        |
| FAM19A5 PROTEIN.                                      | 14301                    | IPI00001328.2 | 17.424                         | 1                        |
| FAMILY WITH SEQUENCE SIMILARITY 36, MEMBER A.         | 14669                    | IPI00103057.2 | 10                             | 1                        |
| FAMILY WITH SEQUENCE SIMILARITY 44, MEMBER B.         | 19196                    | IPI00063667.3 | 5.946                          | 1                        |
| FARNESYL-DIPHOSPHATE FARNESYLTRANSFERASE.             | 48115                    | IPI00020944.1 | 4.317                          | 1                        |
| FASCIN.                                               | 54399                    | IPI00163187.9 | 2.033                          | 1                        |
| FATTY-ACID AMIDE HYDROLASE.                           | 63066                    | IPI00012107.2 | 3.8                            | 1                        |
| F-BOX ONLY PROTEIN 2.                                 | 33328                    | IPI00007087.4 | 4.73                           | 1                        |
| F-BOX ONLY PROTEIN 7.                                 | 58503                    | IPI00294567.3 | 3.257                          | 1                        |
| FCHO2 PROTEIN.                                        | 43190                    | IPI00060416.3 | 6.383                          | 1                        |
| FH1/FH2 DOMAINS-CONTAINING PROTEIN.                   | 126497                   | IPI00001730.1 | 0.945                          | 1                        |
| FIBRILLIN 2 PRECURSOR.                                | 314347                   | IPI00019439.1 | 0.275                          | 1                        |
| FKBP12-RAPAMYCIN COMPLEX-ASSOCIATED PROTEIN.          | 288892                   | IPI00031410.1 | 0.432                          | 1                        |
| FKSG44 PROTEIN.                                       | 51217                    | IPI00011090.2 | 6.681                          | 1                        |
| FLJ00336 PROTEIN (FRAGMENT).                          | 37101                    | IPI00442344.1 | 6.006                          | 1                        |
| FLJ00343 PROTEIN (FRAGMENT).                          | 281430                   | IPI00302592.1 | 0.453                          | 1                        |
| FLJ00380 PROTEIN (FRAGMENT).                          | 86926                    | IPI00376971.1 | 1.264                          | 1                        |
| FLJ10154 PROTEIN.                                     | 32885                    | IPI00419938.1 | 4.029                          | 1                        |

| Protein Description                                                      | Molecular Weight<br>(Da) | IPI Number    | Total Sequence<br>Coverage (%) | Total Unique<br>Peptides |
|--------------------------------------------------------------------------|--------------------------|---------------|--------------------------------|--------------------------|
| FLJ10379 PROTEIN.                                                        | 69714                    | IPI00171087.4 | 2.419                          | 1                        |
| FLJ10979 PROTEIN.                                                        | 76352                    | IPI00181824.1 | 1.493                          | 1                        |
| FLJ11151 PROTEIN.                                                        | 35620                    | IPI00305010.1 | 2.866                          | 1                        |
| FLJ11184 PROTEIN.                                                        | 23821                    | IPI00019962.2 | 9.852                          | 1                        |
| FLJ11286 PROTEIN.                                                        | 29006                    | IPI00383563.1 | 3.922                          | 1                        |
| FLJ11588 PROTEIN.                                                        | 48182                    | IPI00302742.6 | 2.613                          | 1                        |
| FLJ12270 PROTEIN.                                                        | 64848                    | IPI00012257.6 | 1.751                          | 1                        |
| FLJ12716 PROTEIN.                                                        | 91811                    | IPI00396048.3 | 1.718                          | 1                        |
| FLJ13105 PROTEIN.                                                        | 11684                    | IPI00217665.2 | 18.868                         | 1                        |
| FLJ20297 PROTEIN.                                                        | 83071                    | IPI00007929.2 | 2.585                          | 1                        |
| FLJ20699 PROTEIN.                                                        | 52753                    | IPI00291274.2 | 1.919                          | 1                        |
| FLJ21128 PROTEIN.                                                        | 56078                    | IPI00018009.2 | 1.969                          | 1                        |
| FLJ22757 PROTEIN.                                                        | 87065                    | IPI00216878.3 | 1.623                          | 1                        |
| FLJ31795 PROTEIN.                                                        | 25564                    | IPI00329147.1 | 7.048                          | 1                        |
| FLJ32440 PROTEIN.                                                        | 27932                    | IPI00166784.1 | 8.502                          | 1                        |
| FLJ35382 PROTEIN.                                                        | 49742                    | IPI00167998.2 | 2.882                          | 1                        |
| FLJ38482 PROTEIN.                                                        | 30922                    | IPI00470578.2 | 7.749                          | 1                        |
| FLJ40342 PROTEIN.                                                        | 110097                   | IPI00217691.1 | 1.644                          | 1                        |
| FLN29 GENE PRODUCT.                                                      | 64841                    | IPI00009146.3 | 2.062                          | 1                        |
| FTSJ3 PROTEIN.                                                           | 96576                    | IPI00217686.3 | 2.007                          | 1                        |
| FUT11 PROTEIN.                                                           | 55800                    | IPI00217759.1 | 5.488                          | 1                        |
| FYVE-FINGER-CONTAINING RAB5 EFFECTOR PROTEIN RABENOSYN-5.                | 88802                    | IPI00007057.3 | 2.551                          | 1                        |
| G PATCH DOMAIN AND KOW MOTIFS.                                           | 52229                    | IPI00061107.3 | 4.202                          | 1                        |
| G PROTEIN-COUPLED RECEPTOR ASSOCIATED SORTING PROTEIN 1.                 | 156865                   | IPI00060549.6 | 0.645                          | 1                        |
| G10 PROTEIN HOMOLOG.                                                     | 17000                    | IPI00013180.2 | 7.639                          | 1                        |
| G4.                                                                      | 31809                    | IPI00428484.1 | 8.503                          | 1                        |
| GALACTOSIDE 3.                                                           | 42117                    | IPI00007671.1 | 3.047                          | 1                        |
| GALACTOSYLGALACTOSYLXYLOSYLPROTEIN 3-BETA-<br>GLUCURONOSYLTRANSFERASE 1. | 38355                    | IPI00002585.1 | 8.383                          | 1                        |
| GAMMA-AMINOBUTYRIC-ACID RECEPTOR PI SUBUNIT PRECURSOR.                   | 50640                    | IPI00012181.1 | 6.136                          | 1                        |
| GAMMA-GLUTAMYL HYDROLASE PRECURSOR.                                      | 35964                    | IPI00023728.1 | 4.088                          | 1                        |
| GAMMA-INTERFERON INDUCIBLE LYSOSOMAL THIOL REDUCTASE<br>PRECURSOR.       | 29149                    | IPI00007853.1 | 4.215                          | 1                        |
| GAMMA-TAXILIN.                                                           | 60606                    | IPI00019994.3 | 4.924                          | 1                        |
| GANGLIOSIDE EXPRESSION FACTOR 2.                                         | 13715                    | IPI00026358.2 | 6.838                          | 1                        |

| Protein Description                                    | Molecular Weight<br>(Da) | IPI Number    | Total Sequence<br>Coverage (%) | Total Unique<br>Peptides |
|--------------------------------------------------------|--------------------------|---------------|--------------------------------|--------------------------|
| GAP JUNCTION ALPHA-9 PROTEIN.                          | 36093                    | IPI0007618.1  | 5.607                          | 1                        |
| GERANYLGERANYL PYROPHOSPHATE SYNTHETASE.               | 34871                    | IPI00032892.1 | 5                              | 1                        |
| GGA1 PROTEIN.                                          | 72277                    | IPI00007270.2 | 4.573                          | 1                        |
| GK004.                                                 | 14311                    | IPI00329615.3 | 11.538                         | 1                        |
| GL014.                                                 | 61962                    | IPI00178972.2 | 1.825                          | 1                        |
| GLUTAMATE-RICH WD-REPEAT PROTEIN 1.                    | 49419                    | IPI00027831.1 | 4.933                          | 1                        |
| GLUTAMYL AMINOPEPTIDASE.                               | 109244                   | IPI00014375.1 | 1.254                          | 1                        |
| GLUTATHIONE PEROXIDASE 7 PRECURSOR.                    | 20996                    | IPI00045798.3 | 16.578                         | 1                        |
| GLUTATHIONE S-TRANSFERASE A4-4.                        | 25704                    | IPI00005659.1 | 6.757                          | 1                        |
| GLYCOPROTEIN ENDO-ALPHA-1,2-MANNOSIDASE (FRAGMENT).    | 53644                    | IPI00465249.2 | 3.03                           | 1                        |
| GLYCOSYLTRANSFERASE.                                   | 62011                    | IPI00396231.2 | 2.657                          | 1                        |
| GLYCYLPEPTIDE N-TETRADECANOYLTRANSFERASE 2.            | 56980                    | IPI00030223.3 | 1.807                          | 1                        |
| GLYPICAN-1 PRECURSOR.                                  | 61650                    | IPI00015688.1 | 4.301                          | 1                        |
| GMP REDUCTASE 1.                                       | 37419                    | IPI00304803.3 | 6.377                          | 1                        |
| GOLGI MEMBRANE PROTEIN SB140.                          | 28072                    | IPI00334657.2 | 4.669                          | 1                        |
| GOLGI-ASSOCIATED PLANT PATHOGENESIS-RELATED PROTEIN 1. | 17087                    | IPI00007067.4 | 10.458                         | 1                        |
| GPI INOSITOL-DEACYLASE PGAP1.                          | 105383                   | IPI00178415.2 | 1.844                          | 1                        |
| GRIP AND COILED-COIL DOMAIN-CONTAINING PROTEIN 1.      | 87811                    | IPI00165138.1 | 1.677                          | 1                        |
| GROUP XIIA SECRETORY PHOSPHOLIPASE A2 PRECURSOR.       | 21067                    | IPI00017095.1 | 18.519                         | 1                        |
| GS2 PROTEIN.                                           | 27980                    | IPI00013218.1 | 5.929                          | 1                        |
| GTP CYCLOHYDROLASE I FEEDBACK REGULATORY PROTEIN.      | 9567                     | IPI00217253.2 | 30.12                          | 1                        |
| GTP-BINDING PROTEIN RHEB.                              | 20497                    | IPI00016669.1 | 8.696                          | 1                        |
| GUANIDINOACETATE N-METHYLTRANSFERASE.                  | 26318                    | IPI00030182.1 | 6.356                          | 1                        |
| GUANINE NUCLEOTIDE-BINDING PROTEIN G.                  | 7719                     | IPI00470619.3 | 42.857                         | 1                        |
| GWLF839.                                               | 57133                    | IPI00402293.3 | 2.667                          | 1                        |
| GWSC6486.                                              | 19623                    | IPI00009404.2 | 9.302                          | 1                        |
| H3L-LIKE HISTONE (FRAGMENT).                           | 12104                    | IPI00425000.1 | 29.907                         | 1                        |
| HAMARTIN.                                              | 129767                   | IPI00022043.1 | 0.773                          | 1                        |
| HEAT SHOCK 70 KDA PROTEIN 1.                           | 70052                    | IPI00304925.1 | 1.56                           | 1                        |
| HEAT SHOCK 70 KDA PROTEIN 7 (FRAGMENT).                | 26907                    | IPI00011134.1 | 9.717                          | 1                        |
| HECT AND RCC1 CONTAINING PROTEIN 4 ISOFORM 1.          | 118563                   | IPI00333067.2 | 1.608                          | 1                        |
| HEMATOPOIETIC LINEAGE CELL SPECIFIC PROTEIN.           | 53998                    | IPI00026156.1 | 2.058                          | 1                        |
| HEMOPEXIN PRECURSOR.                                   | 51676                    | IPI00022488.1 | 2.814                          | 1                        |
| HEPATOMA-DERIVED GROWTH FACTOR.                        | 26788                    | IPI00020956.1 | 7.5                            | 1                        |
| HEPATOPOIETIN PROTEIN.                                 | 23478                    | IPI00385799.1 | 6.829                          | 1                        |

| Protein Description                                                      | Molecular Weight<br>(Da) | IPI Number    | Total Sequence<br>Coverage (%) | Total Unique<br>Peptides |
|--------------------------------------------------------------------------|--------------------------|---------------|--------------------------------|--------------------------|
| HEXIM1 PROTEIN.                                                          | 40623                    | IPI00007941.1 | 3.9                            | 1                        |
| HGF ACTIVATOR LIKE PROTEIN.                                              | 62672                    | IPI00041065.3 | 3.393                          | 1                        |
| HIN1-LIKE CYSTEINE PROTEASE.                                             | 49737                    | IPI00394941.1 | 2.709                          | 1                        |
| HISTAMINE N-METHYLTRANSFERASE.                                           | 33295                    | IPI00030023.3 | 6.164                          | 1                        |
| HISTIDINE ACID PHOSPHATASE FAMILY PROTEIN.                               | 140407                   | IPI00021701.5 | 1.368                          | 1                        |
| HISTIDYL-TRNA SYNTHETASE HOMOLOG.                                        | 56888                    | IPI00027445.1 | 2.174                          | 1                        |
| HISTONE ACETYLTRANSFERASE TYPE B CATALYTIC SUBUNIT.                      | 49513                    | IPI00024719.1 | 4.296                          | 1                        |
| HISTONE DEACETYLASE 4.                                                   | 119070                   | IPI00010088.1 | 0.923                          | 1                        |
| HISTONE RNA HAIRPIN-BINDING PROTEIN.                                     | 31286                    | IPI00031015.1 | 5.185                          | 1                        |
| HISTONE-LYSINE N-METHYLTRANSFERASE, H3 LYSINE-4 SPECIFIC.                | 40721                    | IPI00028366.2 | 4.918                          | 1                        |
| HLA CLASS II HISTOCOMPATIBILITY ANTIGEN, DQ.                             | 29748                    | IPI00005187.1 | 3.448                          | 1                        |
| HLA CLASS II HISTOCOMPATIBILITY ANTIGEN, DRB1-8 BETA CHAIN<br>PRECURSOR. | 30004                    | IPI00005180.2 | 8.647                          | 1                        |
| HOMEBOX PROTEIN NKX-6.1.                                                 | 37849                    | IPI00019774.1 | 4.36                           | 1                        |
| HOMO SAPIENS PROTEIN INVOLVED IN SEXUAL DEVELOPMENT, COMPLETE<br>CDS.    | 33631                    | IPI00023101.1 | 3.679                          | 1                        |
| HOMOLOG OF POLYHOMEOTIC 3.                                               | 106162                   | IPI00302149.1 | 2.34                           | 1                        |
| HOMOLOGUE OF DROSPHILA RETINAL DEGENERATION B GENE.                      | 135137                   | IPI00307758.4 | 1.043                          | 1                        |
| HORMONE-SENSITIVE LIPASE.                                                | 116614                   | IPI00419542.1 | 1.487                          | 1                        |
| HSP70 BINDING PROTEIN HSPBP2.                                            | 39474                    | IPI00100748.3 | 2.762                          | 1                        |
| HSPC009.                                                                 | 11731                    | IPI00022277.3 | 8.491                          | 1                        |
| HSPC043 PROTEIN.                                                         | 11425                    | IPI00000330.4 | 29.808                         | 1                        |
| HSPC142 PROTEIN.                                                         | 36568                    | IPI00101987.5 | 6.991                          | 1                        |
| HSPC158.                                                                 | 26192                    | IPI00023094.3 | 6.14                           | 1                        |
| HSPC159 PROTEIN.                                                         | 18986                    | IPI00023549.3 | 8.14                           | 1                        |
| HYPOTHETICAL PROTEIN (FRAGMENT).                                         | 23711                    | IPI00030959.1 | 5.53                           | 1                        |
| HYPOTHETICAL PROTEIN (FRAGMENT).                                         | 24291                    | IPI00161975.1 | 13.679                         | 1                        |
| HYPOTHETICAL PROTEIN 384D8_7.                                            | 65937                    | IPI00384821.1 | 3.972                          | 1                        |
| HYPOTHETICAL PROTEIN C20ORF6.                                            | 98796                    | IPI00024167.1 | 1.058                          | 1                        |
| HYPOTHETICAL PROTEIN DKFZP313F092.                                       | 38822                    | IPI00552849.1 | 3.54                           | 1                        |
| HYPOTHETICAL PROTEIN DKFZP434A112.                                       | 110324                   | IPI00186028.4 | 1.145                          | 1                        |
| HYPOTHETICAL PROTEIN DKFZP434A171.                                       | 93969                    | IPI00020265.2 | 2.552                          | 1                        |
| HYPOTHETICAL PROTEIN DKFZP434D1319.                                      | 49166                    | IPI00013651.1 | 3.189                          | 1                        |
| HYPOTHETICAL PROTEIN DKFZP434E248.                                       | 75226                    | IPI00300094.5 | 1.824                          | 1                        |
| HYPOTHETICAL PROTEIN DKFZP434F1919.                                      | 29506                    | IPI00304316.2 | 7.087                          | 1                        |

| Protein Description                             | Molecular Weight<br>(Da) | IPI Number    | Total Sequence<br>Coverage (%) | Total Unique<br>Peptides |
|-------------------------------------------------|--------------------------|---------------|--------------------------------|--------------------------|
| HYPOTHETICAL PROTEIN DKFZP434K1316 (FRAGMENT).  | 72676                    | IPI00385715.1 | 1.52                           | 1                        |
| HYPOTHETICAL PROTEIN DKFZP434K1815.             | 70861                    | IPI00069309.4 | 4.173                          | 1                        |
| HYPOTHETICAL PROTEIN DKFZP547P055.              | 7969                     | IPI00465410.3 | 16.901                         | 1                        |
| HYPOTHETICAL PROTEIN DKFZP564J0123.             | 13866                    | IPI00000447.2 | 7.874                          | 1                        |
| HYPOTHETICAL PROTEIN DKFZP564M0163.             | 31971                    | IPI00071826.1 | 3.425                          | 1                        |
| HYPOTHETICAL PROTEIN DKFZP566L083.              | 19080                    | IPI00295585.1 | 16.667                         | 1                        |
| HYPOTHETICAL PROTEIN DKFZP572F2170.             | 81501                    | IPI00166583.1 | 2.56                           | 1                        |
| HYPOTHETICAL PROTEIN DKFZP586O0222.             | 60372                    | IPI00100106.1 | 1.862                          | 1                        |
| HYPOTHETICAL PROTEIN DKFZP666D0510 (FRAGMENT).  | 26326                    | IPI00470401.1 | 9.091                          | 1                        |
| HYPOTHETICAL PROTEIN DKFZP686A0176.             | 38022                    | IPI00375685.1 | 3.207                          | 1                        |
| HYPOTHETICAL PROTEIN DKFZP686E01209 (FRAGMENT). | 35045                    | IPI00470468.1 | 4.531                          | 1                        |
| HYPOTHETICAL PROTEIN DKFZP686E04229.            | 74171                    | IPI00426062.1 | 3.269                          | 1                        |
| HYPOTHETICAL PROTEIN DKFZP686F0546.             | 190302                   | IPI00465246.1 | 0.641                          | 1                        |
| HYPOTHETICAL PROTEIN DKFZP686J01204.            | 94470                    | IPI00383396.6 | 1.549                          | 1                        |
| HYPOTHETICAL PROTEIN DKFZP686J05113.            | 139944                   | IPI00168459.4 | 1.213                          | 1                        |
| HYPOTHETICAL PROTEIN DKFZP686K03100.            | 317817                   | IPI00184931.3 | 0.491                          | 1                        |
| HYPOTHETICAL PROTEIN DKFZP686L05272.            | 22755                    | IPI00009373.2 | 6.965                          | 1                        |
| HYPOTHETICAL PROTEIN DKFZP686L07201.            | 7025                     | IPI00470555.1 | 39.706                         | 1                        |
| HYPOTHETICAL PROTEIN DKFZP686M0519.             | 22772                    | IPI00470480.1 | 5.854                          | 1                        |
| HYPOTHETICAL PROTEIN DKFZP686O0631.             | 152965                   | IPI00465022.3 | 1.538                          | 1                        |
| HYPOTHETICAL PROTEIN DKFZP686O22167.            | 104078                   | IPI00470924.1 | 1.858                          | 1                        |
| HYPOTHETICAL PROTEIN DKFZP686P17176.            | 26727                    | IPI00470576.3 | 5.439                          | 1                        |
| HYPOTHETICAL PROTEIN DKFZP727A071 (FRAGMENT).   | 45659                    | IPI00003202.4 | 3.178                          | 1                        |
| HYPOTHETICAL PROTEIN DKFZP761A132.              | 49710                    | IPI00031098.3 | 6.364                          | 1                        |
| HYPOTHETICAL PROTEIN DKFZP761C062 (FRAGMENT).   | 88542                    | IPI00166528.1 | 0.874                          | 1                        |
| HYPOTHETICAL PROTEIN DKFZP761G0123.             | 91955                    | IPI00296432.1 | 1.587                          | 1                        |
| HYPOTHETICAL PROTEIN DKFZP761P18121.            | 81602                    | IPI00181047.2 | 2.083                          | 1                        |
| HYPOTHETICAL PROTEIN DKFZP779F1070.             | 63725                    | IPI00006906.2 | 3.08                           | 1                        |
| HYPOTHETICAL PROTEIN DKFZP781D2023.             | 224307                   | IPI00470912.1 | 0.756                          | 1                        |
| HYPOTHETICAL PROTEIN DKFZP781E2122.             | 69744                    | IPI00007126.5 | 2.64                           | 1                        |
| HYPOTHETICAL PROTEIN DKFZP781L10106.            | 94120                    | IPI00008085.4 | 3.249                          | 1                        |
| HYPOTHETICAL PROTEIN DKFZP781O20198.            | 41877                    | IPI00020470.2 | 4.313                          | 1                        |
| HYPOTHETICAL PROTEIN FLJ10375.                  | 68309                    | IPI00220039.4 | 2.886                          | 1                        |
| HYPOTHETICAL PROTEIN FLJ10511.                  | 31281                    | IPI00018260.1 | 7.447                          | 1                        |
| HYPOTHETICAL PROTEIN FLJ10634.                  | 34687                    | IPI00018798.3 | 6.908                          | 1                        |

| Protein Description            | Molecular Weight<br>(Da) | IPI Number    | Total Sequence<br>Coverage (%) | Total Unique<br>Peptides |
|--------------------------------|--------------------------|---------------|--------------------------------|--------------------------|
| HYPOTHETICAL PROTEIN FLJ10672. | 29426                    | IPI00014903.1 | 8.3                            | 1                        |
| HYPOTHETICAL PROTEIN FLJ10770. | 17759                    | IPI00397768.4 | 21.084                         | 1                        |
| HYPOTHETICAL PROTEIN FLJ10871. | 73814                    | IPI00290514.1 | 1.672                          | 1                        |
| HYPOTHETICAL PROTEIN FLJ11063. | 51492                    | IPI00107745.2 | 2.546                          | 1                        |
| HYPOTHETICAL PROTEIN FLJ11282. | 59551                    | IPI00020050.3 | 6.481                          | 1                        |
| HYPOTHETICAL PROTEIN FLJ11386. | 42680                    | IPI00293011.5 | 2.406                          | 1                        |
| HYPOTHETICAL PROTEIN FLJ11749. | 23485                    | IPI00305423.3 | 5.97                           | 1                        |
| HYPOTHETICAL PROTEIN FLJ11773. | 25003                    | IPI00305296.1 | 11.009                         | 1                        |
| HYPOTHETICAL PROTEIN FLJ12165. | 23817                    | IPI00007182.3 | 8.295                          | 1                        |
| HYPOTHETICAL PROTEIN FLJ12448. | 28258                    | IPI00100930.1 | 7.605                          | 1                        |
| HYPOTHETICAL PROTEIN FLJ12519. | 94499                    | IPI00217240.1 | 2.289                          | 1                        |
| HYPOTHETICAL PROTEIN FLJ12528. | 66372                    | IPI00018632.1 | 1.871                          | 1                        |
| HYPOTHETICAL PROTEIN FLJ12750. | 31307                    | IPI00002926.3 | 5.965                          | 1                        |
| HYPOTHETICAL PROTEIN FLJ12806. | 35023                    | IPI00303602.1 | 8.497                          | 1                        |
| HYPOTHETICAL PROTEIN FLJ12895. | 54876                    | IPI00154608.3 | 3.529                          | 1                        |
| HYPOTHETICAL PROTEIN FLJ13110. | 22255                    | IPI00009673.1 | 4.975                          | 1                        |
| HYPOTHETICAL PROTEIN FLJ13144. | 80927                    | IPI00335437.6 | 3.444                          | 1                        |
| HYPOTHETICAL PROTEIN FLJ13391. | 17470                    | IPI00303867.1 | 9.868                          | 1                        |
| HYPOTHETICAL PROTEIN FLJ13479. | 67976                    | IPI00171118.1 | 2.1                            | 1                        |
| HYPOTHETICAL PROTEIN FLJ13611. | 39687                    | IPI00017179.2 | 2.528                          | 1                        |
| HYPOTHETICAL PROTEIN FLJ13853. | 58847                    | IPI00179845.7 | 4.174                          | 1                        |
| HYPOTHETICAL PROTEIN FLJ13910. | 43993                    | IPI00009707.3 | 3.581                          | 1                        |
| HYPOTHETICAL PROTEIN FLJ13933. | 60719                    | IPI00009662.1 | 3.462                          | 1                        |
| HYPOTHETICAL PROTEIN FLJ14008. | 65664                    | IPI00303387.1 | 1.877                          | 1                        |
| HYPOTHETICAL PROTEIN FLJ14400. | 62229                    | IPI00151358.1 | 2.974                          | 1                        |
| HYPOTHETICAL PROTEIN FLJ14464. | 109884                   | IPI00064457.1 | 1.561                          | 1                        |
| HYPOTHETICAL PROTEIN FLJ14601. | 50546                    | IPI00045917.3 | 6.335                          | 1                        |
| HYPOTHETICAL PROTEIN FLJ14668. | 15641                    | IPI00303722.3 | 7.246                          | 1                        |
| HYPOTHETICAL PROTEIN FLJ14740. | 107512                   | IPI00074799.5 | 1.044                          | 1                        |
| HYPOTHETICAL PROTEIN FLJ14994. | 24479                    | IPI00396174.4 | 6.25                           | 1                        |
| HYPOTHETICAL PROTEIN FLJ16544. | 58832                    | IPI00300213.2 | 3.691                          | 1                        |
| HYPOTHETICAL PROTEIN FLJ20014. | 23574                    | IPI00329748.5 | 6.726                          | 1                        |
| HYPOTHETICAL PROTEIN FLJ20142. | 56225                    | IPI00014952.1 | 1.811                          | 1                        |
| HYPOTHETICAL PROTEIN FLJ20166. | 36457                    | IPI00298964.2 | 5.449                          | 1                        |
| HYPOTHETICAL PROTEIN FLJ20245. | 46942                    | IPI00015101.1 | 5.437                          | 1                        |

| Protein Description                       | Molecular Weight<br>(Da) | IPI Number    | Total Sequence<br>Coverage (%) | Total Unique<br>Peptides |
|-------------------------------------------|--------------------------|---------------|--------------------------------|--------------------------|
| HYPOTHETICAL PROTEIN FLJ20280.            | 24193                    | IPI00015609.1 | 6.481                          | 1                        |
| HYPOTHETICAL PROTEIN FLJ20467.            | 15253                    | IPI00016411.1 | 18.841                         | 1                        |
| HYPOTHETICAL PROTEIN FLJ20479.            | 17201                    | IPI00041325.1 | 12.418                         | 1                        |
| HYPOTHETICAL PROTEIN FLJ20487.            | 19599                    | IPI00016443.1 | 8.434                          | 1                        |
| HYPOTHETICAL PROTEIN FLJ20542.            | 67663                    | IPI00063404.4 | 3.167                          | 1                        |
| HYPOTHETICAL PROTEIN FLJ20555.            | 40213                    | IPI00549994.1 | 3.235                          | 1                        |
| HYPOTHETICAL PROTEIN FLJ20604.            | 48843                    | IPI00016637.3 | 3.486                          | 1                        |
| HYPOTHETICAL PROTEIN FLJ20628.            | 52977                    | IPI00057035.2 | 4.193                          | 1                        |
| HYPOTHETICAL PROTEIN FLJ20989.            | 24993                    | IPI00011997.3 | 6.987                          | 1                        |
| HYPOTHETICAL PROTEIN FLJ21190.            | 18681                    | IPI00012197.1 | 10.588                         | 1                        |
| HYPOTHETICAL PROTEIN FLJ21267.            | 39317                    | IPI00465357.3 | 3.371                          | 1                        |
| HYPOTHETICAL PROTEIN FLJ21610.            | 97099                    | IPI00171499.3 | 1.714                          | 1                        |
| HYPOTHETICAL PROTEIN FLJ21702.            | 42123                    | IPI00302990.3 | 6.005                          | 1                        |
| HYPOTHETICAL PROTEIN FLJ21802.            | 71086                    | IPI00002879.3 | 2.184                          | 1                        |
| HYPOTHETICAL PROTEIN FLJ21817.            | 73773                    | IPI00007865.1 | 2.765                          | 1                        |
| HYPOTHETICAL PROTEIN FLJ21820.            | 37319                    | IPI00030257.3 | 8                              | 1                        |
| HYPOTHETICAL PROTEIN FLJ21963.            | 74778                    | IPI00002245.3 | 1.603                          | 1                        |
| HYPOTHETICAL PROTEIN FLJ21988.            | 53020                    | IPI00008348.3 | 2.941                          | 1                        |
| HYPOTHETICAL PROTEIN FLJ22222.            | 35646                    | IPI00002884.3 | 4.389                          | 1                        |
| HYPOTHETICAL PROTEIN FLJ22277.            | 29395                    | IPI00100674.1 | 2.724                          | 1                        |
| HYPOTHETICAL PROTEIN FLJ22471.            | 36961                    | IPI00018605.3 | 4.23                           | 1                        |
| HYPOTHETICAL PROTEIN FLJ22555.            | 32545                    | IPI00291751.5 | 3.093                          | 1                        |
| HYPOTHETICAL PROTEIN FLJ22662.            | 63130                    | IPI00016255.2 | 2.174                          | 1                        |
| HYPOTHETICAL PROTEIN FLJ22833.            | 14677                    | IPI00010228.1 | 5.97                           | 1                        |
| HYPOTHETICAL PROTEIN FLJ22955.            | 14927                    | IPI00015737.1 | 8.333                          | 1                        |
| HYPOTHETICAL PROTEIN FLJ23441.            | 54077                    | IPI00101664.2 | 2.516                          | 1                        |
| HYPOTHETICAL PROTEIN FLJ23636.            | 23909                    | IPI00291695.1 | 5.742                          | 1                        |
| HYPOTHETICAL PROTEIN FLJ25361.            | 29052                    | IPI00065088.2 | 11.069                         | 1                        |
| HYPOTHETICAL PROTEIN FLJ25477 ISOFORM 1 . | 69507                    | IPI00384608.2 | 2.534                          | 1                        |
| HYPOTHETICAL PROTEIN FLJ30131.            | 19761                    | IPI00152002.1 | 5                              | 1                        |
| HYPOTHETICAL PROTEIN FLJ30671.            | 52813                    | IPI00043731.1 | 4.228                          | 1                        |
| HYPOTHETICAL PROTEIN FLJ31409.            | 61311                    | IPI00150963.2 | 4.037                          | 1                        |
| HYPOTHETICAL PROTEIN FLJ32115.            | 30480                    | IPI00061005.3 | 7.692                          | 1                        |
| HYPOTHETICAL PROTEIN FLJ32756.            | 19601                    | IPI00307515.1 | 5.65                           | 1                        |
| HYPOTHETICAL PROTEIN FLJ32841.            | 69990                    | IPI00065276.1 | 1.7                            | 1                        |



| Protein Description              | Molecular Weight<br>(Da) | IPI Number    | Total Sequence<br>Coverage (%) | Total Unique<br>Peptides |
|----------------------------------|--------------------------|---------------|--------------------------------|--------------------------|
| HYPOTHETICAL PROTEIN FLJ33207.   | 63885                    | IPI00260270.3 | 2.139                          | 1                        |
| HYPOTHETICAL PROTEIN FLJ34411.   | 50511                    | IPI00300763.3 | 5.275                          | 1                        |
| HYPOTHETICAL PROTEIN FLJ34700.   | 89758                    | IPI00170537.2 | 3.522                          | 1                        |
| HYPOTHETICAL PROTEIN FLJ34719.   | 37477                    | IPI00171390.1 | 3.846                          | 1                        |
| HYPOTHETICAL PROTEIN FLJ35453.   | 60479                    | IPI00167985.3 | 3.025                          | 1                        |
| HYPOTHETICAL PROTEIN FLJ35820.   | 61311                    | IPI00167911.1 | 2.637                          | 1                        |
| HYPOTHETICAL PROTEIN FLJ36560.   | 82609                    | IPI00186139.3 | 1.983                          | 1                        |
| HYPOTHETICAL PROTEIN FLJ36839.   | 59404                    | IPI00167773.1 | 2.018                          | 1                        |
| HYPOTHETICAL PROTEIN FLJ37947.   | 20024                    | IPI00383909.1 | 7.104                          | 1                        |
| HYPOTHETICAL PROTEIN FLJ38183.   | 21108                    | IPI00167658.3 | 12.183                         | 1                        |
| HYPOTHETICAL PROTEIN FLJ38620.   | 42124                    | IPI00167009.2 | 4.509                          | 1                        |
| HYPOTHETICAL PROTEIN FLJ39023.   | 67920                    | IPI00384789.1 | 2.027                          | 1                        |
| HYPOTHETICAL PROTEIN FLJ39085.   | 67730                    | IPI00167516.1 | 1.495                          | 1                        |
| HYPOTHETICAL PROTEIN FLJ41947.   | 30847                    | IPI00247167.2 | 4                              | 1                        |
| HYPOTHETICAL PROTEIN FLJ42455.   | 58664                    | IPI00217911.2 | 2.783                          | 1                        |
| HYPOTHETICAL PROTEIN FLJ42783.   | 87928                    | IPI00376788.1 | 4.281                          | 1                        |
| HYPOTHETICAL PROTEIN FLJ42833.   | 18621                    | IPI00446100.1 | 5.348                          | 1                        |
| HYPOTHETICAL PROTEIN FLJ42845.   | 68092                    | IPI00446036.1 | 1.656                          | 1                        |
| HYPOTHETICAL PROTEIN FLJ43647.   | 90397                    | IPI00419050.1 | 1.366                          | 1                        |
| HYPOTHETICAL PROTEIN FLJ44731.   | 62277                    | IPI00445029.1 | 2.65                           | 1                        |
| HYPOTHETICAL PROTEIN FLJ44759.   | 30107                    | IPI00445004.1 | 5.357                          | 1                        |
| HYPOTHETICAL PROTEIN FLJ45119.   | 48310                    | IPI00060314.2 | 2.336                          | 1                        |
| HYPOTHETICAL PROTEIN FLJ45252.   | 23110                    | IPI00397883.3 | 8.333                          | 1                        |
| HYPOTHETICAL PROTEIN FLJ46347.   | 53616                    | IPI00397927.1 | 3.101                          | 1                        |
| HYPOTHETICAL PROTEIN FLJ90068.   | 21691                    | IPI00166444.1 | 4.651                          | 1                        |
| HYPOTHETICAL PROTEIN FLJ90213.   | 49708                    | IPI00385992.3 | 5.656                          | 1                        |
| HYPOTHETICAL PROTEIN FLJ90386.   | 55401                    | IPI00174442.2 | 2.312                          | 1                        |
| HYPOTHETICAL PROTEIN FLJ90455.   | 81648                    | IPI00334914.1 | 3.001                          | 1                        |
| HYPOTHETICAL PROTEIN FLJ90459.   | 83527                    | IPI00336156.3 | 3.581                          | 1                        |
| HYPOTHETICAL PROTEIN HAKAI.      | 54519                    | IPI00290429.7 | 1.833                          | 1                        |
| HYPOTHETICAL PROTEIN KIAA0082.   | 95321                    | IPI00166153.3 | 3.114                          | 1                        |
| HYPOTHETICAL PROTEIN KIAA0853.   | 196635                   | IPI00016472.2 | 1.559                          | 1                        |
| HYPOTHETICAL PROTEIN LOC155435 . | 11678                    | IPI00401205.3 | 12.264                         | 1                        |
| HYPOTHETICAL PROTEIN LOC168850 . | 75236                    | IPI00396098.1 | 1.355                          | 1                        |
| HYPOTHETICAL PROTEIN LOC340061.  | 42193                    | IPI00257059.1 | 5.541                          | 1                        |

| Protein Description                           | Molecular Weight<br>(Da) | IPI Number    | Total Sequence<br>Coverage (%) | Total Unique<br>Peptides |
|-----------------------------------------------|--------------------------|---------------|--------------------------------|--------------------------|
| HYPOTHETICAL PROTEIN MGC10198.                | 21251                    | IPI00103252.2 | 7.447                          | 1                        |
| HYPOTHETICAL PROTEIN MGC11061.                | 27083                    | IPI00031127.1 | 7.377                          | 1                        |
| HYPOTHETICAL PROTEIN MGC14156.                | 12655                    | IPI00063244.1 | 20.175                         | 1                        |
| HYPOTHETICAL PROTEIN MGC20419.                | 38616                    | IPI00061528.3 | 5.085                          | 1                        |
| HYPOTHETICAL PROTEIN MGC20781.                | 33528                    | IPI00056505.3 | 6.164                          | 1                        |
| HYPOTHETICAL PROTEIN MGC2744.                 | 58753                    | IPI00019335.1 | 4.19                           | 1                        |
| HYPOTHETICAL PROTEIN MGC33637.                | 58335                    | IPI00169284.7 | 1.946                          | 1                        |
| HYPOTHETICAL PROTEIN MGC35274.                | 23463                    | IPI00216874.1 | 8.837                          | 1                        |
| HYPOTHETICAL PROTEIN MGC4655.                 | 41892                    | IPI00061520.3 | 2.918                          | 1                        |
| HYPOTHETICAL PROTEIN MGC4825.                 | 22285                    | IPI00042580.3 | 5.556                          | 1                        |
| HYPOTHETICAL PROTEIN MGC5509.                 | 25858                    | IPI00031698.3 | 7.328                          | 1                        |
| HYPOTHETICAL PROTEIN MGC5987.                 | 20109                    | IPI00337556.1 | 10.227                         | 1                        |
| HYPOTHETICAL PROTEIN MGC61571.                | 12490                    | IPI00376478.3 | 9.434                          | 1                        |
| HYPOTHETICAL PROTEIN MGC61716.                | 44011                    | IPI00376346.3 | 4.199                          | 1                        |
| HYPOTHETICAL PROTEIN PSEC0029.                | 32952                    | IPI00329598.1 | 3.333                          | 1                        |
| HYPOTHETICAL PROTEIN PSEC0045.                | 42543                    | IPI00329596.1 | 3.226                          | 1                        |
| HYPOTHETICAL PROTEIN PSEC0136.                | 46189                    | IPI00301163.1 | 2.296                          | 1                        |
| HYPOTHETICAL PROTEIN PSEC0149.                | 47443                    | IPI00290584.5 | 2.315                          | 1                        |
| HYPOTHETICAL PROTEIN WUGSC:H_DJ0728D04.2.     | 78963                    | IPI00010345.2 | 1.644                          | 1                        |
| HYPOTHETICAL PROTEIN.                         | 61009                    | IPI00003455.3 | 2.583                          | 1                        |
| HYPOTHETICAL PROTEIN.                         | 17779                    | IPI00029002.1 | 6.25                           | 1                        |
| HYPOTHETICAL PROTEIN.                         | 34793                    | IPI00032575.1 | 2.236                          | 1                        |
| HYPOTHETICAL PROTEIN.                         | 58353                    | IPI00103891.1 | 6.334                          | 1                        |
| HYPOTHETICAL PROTEIN.                         | 58489                    | IPI00143921.8 | 2.959                          | 1                        |
| HYPOTHETICAL PROTEIN.                         | 15645                    | IPI00168427.5 | 7.857                          | 1                        |
| HYPOTHETICAL PROTEIN.                         | 15608                    | IPI00168462.1 | 7.246                          | 1                        |
| HYPOTHETICAL PROTEIN.                         | 55115                    | IPI00168816.1 | 2.191                          | 1                        |
| HYPOTHETICAL PROTEIN.                         | 118966                   | IPI00181396.3 | 2.726                          | 1                        |
| HYPOTHETICAL PROTEIN.                         | 27506                    | IPI00187143.1 | 10.484                         | 1                        |
| HYPOTHETICAL PROTEIN.                         | 60741                    | IPI00217795.2 | 1.808                          | 1                        |
| HYPOTHETICAL PROTEIN.                         | 65266                    | IPI00220299.1 | 5.963                          | 1                        |
| HYPOTHETICAL PROTEIN.                         | 39756                    | IPI00301711.3 | 2.981                          | 1                        |
| HYPOTHETICAL PROTEIN.                         | 21744                    | IPI00413170.4 | 12.376                         | 1                        |
| HYPOTHETICAL PSEUDOURIDINE SYNTHASE KIAA1897. | 75035                    | IPI00044761.4 | 1.815                          | 1                        |
| HYPOTHETICAL UPF0195 PROTEIN CGI-128.         | 17663                    | IPI00007024.1 | 13.497                         | 1                        |

| Protein Description                                          | Molecular Weight<br>(Da) | IPI Number    | Total Sequence<br>Coverage (%) | Total Unique<br>Peptides |
|--------------------------------------------------------------|--------------------------|---------------|--------------------------------|--------------------------|
| HYPOTHETICAL UPF0195 PROTEIN FLJ22875.                       | 18355                    | IPI00030985.1 | 5.625                          | 1                        |
| ICB-1GAMMA.                                                  | 39620                    | IPI00307376.3 | 7.163                          | 1                        |
| IFIT2 PROTEIN.                                               | 56213                    | IPI00018298.3 | 4.752                          | 1                        |
| IG LAMBDA CHAIN C REGIONS.                                   | 64770                    | IPI00551005.1 | 1.667                          | 1                        |
| IMMEDIATE EARLY RESPONSE 3.                                  | 14555                    | IPI00554802.1 | 11.594                         | 1                        |
| IMMUNODEFICIENCY VIRUS TYPE I ENHANCER BINDING PROTEIN 3.    | 259465                   | IPI00328089.2 | 0.665                          | 1                        |
| IMPORTIN ALPHA-1 SUBUNIT.                                    | 60249                    | IPI00303292.1 | 2.045                          | 1                        |
| IMPORTIN ALPHA-2 SUBUNIT.                                    | 57862                    | IPI00002214.1 | 2.836                          | 1                        |
| IMPORTIN ALPHA-3 SUBUNIT.                                    | 57811                    | IPI00299033.1 | 5.566                          | 1                        |
| IMPORTIN ALPHA-4 SUBUNIT.                                    | 57887                    | IPI00012578.1 | 3.263                          | 1                        |
| IMPORTIN ALPHA-7 SUBUNIT.                                    | 60030                    | IPI00155940.1 | 3.545                          | 1                        |
| INFLAMMATION-RELATED G PROTEIN-COUPLED RECEPTOR EX33.        | 43705                    | IPI00006903.1 | 1.768                          | 1                        |
| INHIBITOR-1.                                                 | 18909                    | IPI00299014.7 | 11.696                         | 1                        |
| INOSITOL POLYPHOSPHATE 4-PHOSPHATASE TYPE II-ALPHA.          | 104732                   | IPI00022020.1 | 2.165                          | 1                        |
| INSULIN PROMOTER FACTOR-1.                                   | 30771                    | IPI00006036.1 | 4.947                          | 1                        |
| INSULIN RECEPTOR SUBSTRATE 2 INSERTION MUTANT (FRAGMENT).    | 137433                   | IPI00464978.1 | 1.867                          | 1                        |
| INSULIN-LIKE GROWTH FACTOR I RECEPTOR PRECURSOR.             | 154793                   | IPI00027232.3 | 0.732                          | 1                        |
| INTEGRIN ALPHA-5 PRECURSOR.                                  | 114536                   | IPI00306604.5 | 2.574                          | 1                        |
| INTEGRIN, ALPHA 1 PRECURSOR .                                | 130848                   | IPI00472202.1 | 0.848                          | 1                        |
| INTERFERON-INDUCED PROTEIN WITH TETRATRICOPEPTIDE REPEATS 5. | 55847                    | IPI00012756.1 | 2.282                          | 1                        |
| INTERLEUKIN-18 PRECURSOR.                                    | 22615                    | IPI00290198.2 | 6.154                          | 1                        |
| INTERLEUKIN-4 INDUCED PROTEIN 1 PRECURSOR.                   | 62881                    | IPI00045464.4 | 2.998                          | 1                        |
| IRF2BP1 PROTEIN.                                             | 61617                    | IPI00465340.1 | 2.226                          | 1                        |
| IRON-SULFUR CLUSTER ASSEMBLY ENZYME, ISOFORM ISCU2.          | 17999                    | IPI00022240.2 | 5.389                          | 1                        |
| ISLET AMYLOID POLYPEPTIDE PRECURSOR.                         | 9806                     | IPI00023679.1 | 29.213                         | 1                        |
| JAGN1 PROTEIN.                                               | 21125                    | IPI00329025.1 | 6.557                          | 1                        |
| JUNCTOPHILIN 1.                                              | 71686                    | IPI00173461.1 | 1.664                          | 1                        |
| KAI1 PROTEIN (FRAGMENT).                                     | 29644                    | IPI00020446.4 | 5.243                          | 1                        |
| KALLISTATIN PRECURSOR.                                       | 48556                    | IPI00328609.2 | 4.45                           | 1                        |
| KB07 PROTEIN (FRAGMENT).                                     | 26589                    | IPI00071054.1 | 5.761                          | 1                        |
| KERATIN 5C.                                                  | 59370                    | IPI00329306.2 | 2.578                          | 1                        |
| KERATIN, TYPE II CUTICULAR HB4.                              | 64895                    | IPI00300052.1 | 1.5                            | 1                        |
| KERATIN, TYPE II CYTOSKELETAL 3.                             | 64511                    | IPI00290857.1 | 1.908                          | 1                        |
| KIAA0068 PROTEIN (FRAGMENT).                                 | 147136                   | IPI00030960.1 | 1.023                          | 1                        |
| KIAA0155 PROTEIN (FRAGMENT).                                 | 135680                   | IPI00005625.2 | 2.51                           | 1                        |

| Protein Description                            | Molecular Weight<br>(Da) | IPI Number    | Total Sequence<br>Coverage (%) | Total Unique<br>Peptides |
|------------------------------------------------|--------------------------|---------------|--------------------------------|--------------------------|
| KIAA0266 PROTEIN.                              | 55651                    | IPI00472528.4 | 3.455                          | 1                        |
| KIAA0377 PROTEIN.                              | 92061                    | IPI00005663.3 | 2.815                          | 1                        |
| KIAA0467 PROTEIN.                              | 231117                   | IPI00002221.4 | 0.523                          | 1                        |
| KIAA0553 PROTEIN .                             | 164197                   | IPI00457284.1 | 2.064                          | 1                        |
| KIAA0638 PROTEIN (FRAGMENT).                   | 152048                   | IPI00165619.2 | 0.939                          | 1                        |
| KIAA0663 PROTEIN (FRAGMENT).                   | 68731                    | IPI00328306.6 | 2.291                          | 1                        |
| KIAA0679 PROTEIN (FRAGMENT).                   | 103071                   | IPI00465449.1 | 2.399                          | 1                        |
| KIAA0692 PROTEIN (FRAGMENT).                   | 105198                   | IPI00329245.3 | 0.842                          | 1                        |
| KIAA0864 PROTEIN (FRAGMENT).                   | 158412                   | IPI00295457.3 | 2.068                          | 1                        |
| KIAA1068 PROTEIN.                              | 40779                    | IPI00238209.1 | 4.709                          | 1                        |
| KIAA1115 .                                     | 97792                    | IPI00402008.3 | 2.02                           | 1                        |
| KIAA1279 PROTEIN (FRAGMENT).                   | 72986                    | IPI00297203.1 | 3.323                          | 1                        |
| KIAA1390 PROTEIN (FRAGMENT).                   | 55877                    | IPI00292905.3 | 5.743                          | 1                        |
| KIAA1414 PROTEIN .                             | 224302                   | IPI00479069.1 | 1.642                          | 1                        |
| KIAA1458 PROTEIN.                              | 62543                    | IPI00020601.4 | 2.926                          | 1                        |
| KIAA1609 PROTEIN.                              | 51033                    | IPI00412243.2 | 4.386                          | 1                        |
| KIAA1698 PROTEIN.                              | 107995                   | IPI00304676.5 | 1.865                          | 1                        |
| KIAA1840 PROTEIN (FRAGMENT).                   | 278808                   | IPI00101923.4 | 0.409                          | 1                        |
| KIAA1853 PROTEIN .                             | 68559                    | IPI00186554.4 | 4.255                          | 1                        |
| KIAA1914 PROTEIN (FRAGMENT).                   | 50308                    | IPI00382615.1 | 2.609                          | 1                        |
| KIAA1970 PROTEIN.                              | 59959                    | IPI00384707.1 | 1.873                          | 1                        |
| KIAA2014 PROTEIN.                              | 103866                   | IPI00385874.4 | 2.186                          | 1                        |
| KPI-2 PROTEIN.                                 | 164927                   | IPI00217391.3 | 0.732                          | 1                        |
| L-3-PHOSPHOSERINE PHOSPHATASE.                 | 25022                    | IPI00019178.1 | 9.333                          | 1                        |
| LAG1 LONGEVITY ASSURANCE HOMOLOG 4.            | 46399                    | IPI00002225.2 | 2.792                          | 1                        |
| LAG1 LONGEVITY ASSURANCE HOMOLOG 6.            | 44890                    | IPI00409608.1 | 3.125                          | 1                        |
| LAMININ ALPHA-4 CHAIN PRECURSOR.               | 202524                   | IPI00329482.2 | 0.878                          | 1                        |
| LANC-LIKE PROTEIN 2.                           | 50854                    | IPI00032995.1 | 4                              | 1                        |
| LBP-1B TRANSCRIPTION FACTOR PROTEIN.           | 60583                    | IPI00005018.2 | 3.327                          | 1                        |
| LDL RECEPTOR ADAPTOR PROTEIN.                  | 33885                    | IPI00004758.3 | 4.545                          | 1                        |
| LEGUMAIN PRECURSOR.                            | 49411                    | IPI00293303.1 | 3.926                          | 1                        |
| LEPTIN PRECURSOR.                              | 18641                    | IPI00012760.1 | 7.784                          | 1                        |
| LEUCINE CARBOXYL METHYLTRANSFERASE 1.          | 38379                    | IPI00296370.1 | 6.587                          | 1                        |
| LEUCINE ZIPPER & ICAT HOMOLOGOUS PROTEIN LZIC. | 21495                    | IPI00152900.1 | 11.579                         | 1                        |
| LEUCINE ZIPPER PROTEIN 1 .                     | 120304                   | IPI00395737.2 | 1.115                          | 1                        |

| Protein Description                                                                                      | Molecular Weight<br>(Da) | IPI Number    | Total Sequence<br>Coverage (%) | Total Unique<br>Peptides |
|----------------------------------------------------------------------------------------------------------|--------------------------|---------------|--------------------------------|--------------------------|
| LEUCINE ZIPPER PUTATIVE TUMOR SUPPRESSOR 2.                                                              | 72759                    | IPI00101927.2 | 2.392                          | 1                        |
| LEUCINE-RICH REPEAT TRANSMEMBRANE PROTEIN FLRT2 PRECURSOR.                                               | 74049                    | IPI00001633.1 | 2.121                          | 1                        |
| LEUCINE-RICH REPEATS AND IMMUNOGLOBULIN-LIKE DOMAINS PROTEIN 2<br>PRECURSOR.                             | 118965                   | IPI00478892.2 | 1.878                          | 1                        |
| LEUCINE-ZIPPER-LIKE PROTEIN 1.                                                                           | 21678                    | IPI00103059.2 | 4.369                          | 1                        |
| LIM HOMEBOX PROTEIN COFACTOR.                                                                            | 42806                    | IPI00099111.3 | 6.4                            | 1                        |
| LINE-1 REVERSE TRANSCRIPTASE HOMOLOG.                                                                    | 147113                   | IPI00029222.3 | 1.906                          | 1                        |
| LIPIN 1.                                                                                                 | 98664                    | IPI00032388.4 | 1.798                          | 1                        |
| LIPRIN-BETA 2.                                                                                           | 98445                    | IPI00301689.7 | 1.256                          | 1                        |
| LKB1 INTERACTING PROTEIN.                                                                                | 121343                   | IPI00170934.1 | 1.365                          | 1                        |
| LOC113444 PROTEIN.                                                                                       | 10799                    | IPI00386616.3 | 27.174                         | 1                        |
| LOC285148 PROTEIN.                                                                                       | 27599                    | IPI00419194.2 | 6.048                          | 1                        |
| LOC348180 PROTEIN (FRAGMENT).                                                                            | 64066                    | IPI00418412.1 | 1.868                          | 1                        |
| LOC375196 PROTEIN (FRAGMENT).                                                                            | 25861                    | IPI00296332.4 | 8.75                           | 1                        |
| LOH12CR1.                                                                                                | 22222                    | IPI00056386.1 | 11.224                         | 1                        |
| LOW-AFFINITY CATIONIC AMINO ACID TRANSPORTER-2.                                                          | 71679                    | IPI00003819.3 | 1.672                          | 1                        |
| LOW-DENSITY LIPOPROTEIN RECEPTOR-RELATED PROTEIN 11 PRECURSOR.                                           | 53351                    | IPI00045841.2 | 2.2                            | 1                        |
| LUTHERAN BLOOD GROUP GLYCOPROTEIN PRECURSOR.                                                             | 67375                    | IPI00002406.1 | 2.07                           | 1                        |
| LYAR PROTEIN.                                                                                            | 43653                    | IPI00015838.2 | 2.375                          | 1                        |
| LYMPHOBLASTIC LEUKEMIA DERIVED SEQUENCE 1 .                                                              | 29938                    | IPI00218258.4 | 6.429                          | 1                        |
| MAC30 PROTEIN (FRAGMENT).                                                                                | 22443                    | IPI00020004.1 | 5.291                          | 1                        |
| MAGMAS-LIKE PROTEIN.                                                                                     | 15942                    | IPI00218463.2 | 15.862                         | 1                        |
| MAGUK P55 SUBFAMILY MEMBER 5.                                                                            | 77251                    | IPI00174976.3 | 1.778                          | 1                        |
| MAJOR CENTROMERE AUTOANTIGEN B.                                                                          | 65171                    | IPI00010388.1 | 2.838                          | 1                        |
| MAMMALIAN EPENDYMIN RELATED PROTEIN 1.                                                                   | 38141                    | IPI00259102.1 | 2.907                          | 1                        |
| MANNOSYL (ALPHA-1,3-)-GLYCOPROTEIN BETA-1,4-N-<br>ACETYLGLUCOSAMINYLTRANSFERASE, ISOENZYME B, ISOFORM 1. | 63232                    | IPI00329510.6 | 3.285                          | 1                        |
| MARINER TRANSPOSASE.                                                                                     | 40410                    | IPI00385004.1 | 8.547                          | 1                        |
| MARK2 PROTEIN.                                                                                           | 81209                    | IPI00290158.5 | 3.039                          | 1                        |
| MDC-3.13 ISOFORM 2.                                                                                      | 23003                    | IPI00027627.1 | 10.101                         | 1                        |
| MEGSIN.                                                                                                  | 42905                    | IPI00021555.1 | 6.053                          | 1                        |
| MEMBRANE INTERACTING PROTEIN OF RGS16.                                                                   | 37718                    | IPI00010279.3 | 4.532                          | 1                        |
| METHIONINE SYNTHASE.                                                                                     | 140527                   | IPI00293769.3 | 0.87                           | 1                        |
| METHIONINE-R-SULFOXIDE REDUCTASE B.                                                                      | 21468                    | IPI00032871.1 | 4.975                          | 1                        |

| Protein Description                                              | Molecular Weight<br>(Da) | IPI Number    | Total Sequence<br>Coverage (%) | Total Unique<br>Peptides |
|------------------------------------------------------------------|--------------------------|---------------|--------------------------------|--------------------------|
| METHYLOSOME SUBUNIT PICLN.                                       | 26215                    | IPI00004795.1 | 13.08                          | 1                        |
| MGC11256 PROTEIN.                                                | 34958                    | IPI00386754.3 | 4.984                          | 1                        |
| MGC15407 PROTEIN.                                                | 39423                    | IPI00171833.1 | 6.14                           | 1                        |
| MGC17943 PROTEIN.                                                | 11748                    | IPI00184546.3 | 12.931                         | 1                        |
| MGC19604 PROTEIN.                                                | 19521                    | IPI00440693.3 | 6.557                          | 1                        |
| MGC2477 PROTEIN.                                                 | 18396                    | IPI00012200.1 | 8.176                          | 1                        |
| MGC3207 PROTEIN.                                                 | 39150                    | IPI00005948.1 | 3.523                          | 1                        |
| MGC4293 PROTEIN.                                                 | 32904                    | IPI00171856.1 | 8.278                          | 1                        |
| MGC8721 PROTEIN.                                                 | 36975                    | IPI00303839.3 | 3.835                          | 1                        |
| MGRN1 PROTEIN.                                                   | 63190                    | IPI00297251.2 | 2.257                          | 1                        |
| MICAL-LIKE 2 ISOFORM 2 .                                         | 75768                    | IPI00003057.1 | 2.131                          | 1                        |
| MICROSOMAL STRESS 70 PROTEIN ATPASE CORE PRECURSOR.              | 51927                    | IPI00299299.3 | 2.76                           | 1                        |
| MICROTUBULE-ASSOCIATED PROTEINS 1A/1B LIGHT CHAIN 3A.            | 14493                    | IPI00015423.1 | 10.4                           | 1                        |
| MIFR-2.                                                          | 41639                    | IPI00413642.2 | 4.145                          | 1                        |
| MIND BOMB.                                                       | 110136                   | IPI00183054.1 | 1.889                          | 1                        |
| MINOR HISTOCOMPATIBILITY ANTIGEN HA-1.                           | 124551                   | IPI00022471.4 | 1.937                          | 1                        |
| MITOCHONDRIAL 28S RIBOSOMAL PROTEIN S24.                         | 18877                    | IPI00000181.1 | 12.048                         | 1                        |
| MITOCHONDRIAL 28S RIBOSOMAL PROTEIN S27.                         | 47669                    | IPI00022002.5 | 2.657                          | 1                        |
| MITOCHONDRIAL 28S RIBOSOMAL PROTEIN S30.                         | 50349                    | IPI00010278.5 | 4.556                          | 1                        |
| MITOCHONDRIAL 28S RIBOSOMAL PROTEIN S33.                         | 12629                    | IPI00007059.1 | 16.981                         | 1                        |
| MITOCHONDRIAL 39S RIBOSOMAL PROTEIN L51.                         | 15095                    | IPI00009437.2 | 9.375                          | 1                        |
| MITOCHONDRIAL IMPORT INNER MEMBRANE TRANSLOCASE SUBUNIT TIM13 B. | 10500                    | IPI00001589.1 | 14.737                         | 1                        |
| MITOCHONDRIAL IMPORT INNER MEMBRANE TRANSLOCASE SUBUNIT TIM8 A.  | 10998                    | IPI00028376.1 | 11.34                          | 1                        |
| MITOCHONDRIAL IMPORT INNER MEMBRANE TRANSLOCASE SUBUNIT TIM9 B.  | 11586                    | IPI00001538.3 | 10.68                          | 1                        |
| MITOCHONDRIAL IMPORT RECEPTOR SUBUNIT TOM20 HOMOLOG.             | 16298                    | IPI00016676.1 | 8.966                          | 1                        |
| MITOCHONDRIAL METHIONYL-TRNA SYNTHETASE.                         | 66627                    | IPI00062839.3 | 2.698                          | 1                        |
| MITOCHONDRIAL RIBOSOMAL PROTEIN L20.                             | 17443                    | IPI00013706.3 | 14.094                         | 1                        |
| MITOCHONDRIAL RIBOSOMAL PROTEIN L24.                             | 24915                    | IPI00100667.1 | 6.019                          | 1                        |
| MITOCHONDRIAL RIBOSOMAL PROTEIN L37.                             | 48117                    | IPI00162330.1 | 2.6                            | 1                        |
| MITOCHONDRIAL RIBOSOMAL PROTEIN L38.                             | 40757                    | IPI00061231.3 | 3.179                          | 1                        |
| MITOFUSIN 2.                                                     | 86688                    | IPI00294978.4 | 1.053                          | 1                        |
| MITOGEN ACTIVATED PROTEIN KINASE ACTIVATED PROTEIN KINASE-3.     | 42987                    | IPI00005777.1 | 7.068                          | 1                        |

| Protein Description                                                        | Molecular Weight<br>(Da) | IPI Number    | Total Sequence<br>Coverage (%) | Total Unique<br>Peptides |
|----------------------------------------------------------------------------|--------------------------|---------------|--------------------------------|--------------------------|
| MITOGEN-ACTIVATED PROTEIN KINASE KINASE KINASE 9 .                         | 123373                   | IPI00179189.5 | 1.163                          | 1                        |
| MITOGEN-ACTIVATED PROTEIN KINASE KINASE KINASE 5.                          | 95040                    | IPI00294842.3 | 4.019                          | 1                        |
| MKI67 (FHA DOMAIN) INTERACTING NUCLEOLAR PHOSPHOPROTEIN.                   | 34253                    | IPI00154590.5 | 4.778                          | 1                        |
| MLEL1 PROTEIN.                                                             | 114776                   | IPI00027415.1 | 1.488                          | 1                        |
| MMS19-LIKE.                                                                | 113290                   | IPI00154451.2 | 2.233                          | 1                        |
| MOLYBDENUM COFACTOR SYNTHESIS PROTEIN 3.                                   | 49669                    | IPI00004489.1 | 2.826                          | 1                        |
| MONOCARBOXYLATE TRANSPORTER 4.                                             | 49469                    | IPI00006666.1 | 5.161                          | 1                        |
| MONOCYTE DIFFERENTIATION ANTIGEN CD14 PRECURSOR.                           | 40076                    | IPI00029260.2 | 5.067                          | 1                        |
| MOTHERS AGAINST DECAPENTAPLEGIC HOMOLOG 1.                                 | 52260                    | IPI00019549.1 | 3.226                          | 1                        |
| MOTHERS AGAINST DECAPENTAPLEGIC HOMOLOG 5.                                 | 52258                    | IPI00017730.1 | 3.226                          | 1                        |
| M-PHASE PHOSPHOPROTEIN 8.                                                  | 97182                    | IPI00030408.2 | 1.977                          | 1                        |
| MRNA DECAPPING ENZYME 1B.                                                  | 67851                    | IPI00328309.1 | 3.56                           | 1                        |
| MSIN3A ASSOCIATED POLYPEPTIDE P30.                                         | 23306                    | IPI00022019.1 | 10.909                         | 1                        |
| MULTIMERIN 1 PRECURSOR.                                                    | 138072                   | IPI00012269.1 | 1.059                          | 1                        |
| MULTIPLE COAGULATION FACTOR DEFICIENCY PROTEIN 2 PRECURSOR.                | 16390                    | IPI00328680.2 | 23.973                         | 1                        |
| MULTIPLE EGF-LIKE-DOMAIN PROTEIN 4.                                        | 254573                   | IPI00027310.4 | 1.132                          | 1                        |
| MULTIPLE MYELOMA TRANSFORMING GENE 2.                                      | 29409                    | IPI00293746.1 | 3.802                          | 1                        |
| MUSCLE, SKELETAL, RECEPTOR TYROSINE KINASE.                                | 12641                    | IPI00514895.1 | 6.034                          | 1                        |
| MYBBP1A PROTEIN.                                                           | 148874                   | IPI00005024.2 | 1.431                          | 1                        |
| MYELOID LEUKEMIA FACTOR 2.                                                 | 28147                    | IPI00023095.1 | 4.032                          | 1                        |
| MYELOID-ASSOCIATED DIFFERENTIATION MARKER.                                 | 35274                    | IPI00102685.1 | 7.143                          | 1                        |
| MYL9 PROTEIN.                                                              | 13866                    | IPI00030929.4 | 8.475                          | 1                        |
| MYOGLOBIN.                                                                 | 17053                    | IPI00217493.4 | 11.765                         | 1                        |
| MYOSIN HEAVY CHAIN, SKELETAL MUSCLE, EXTRAOCULAR.                          | 223680                   | IPI00007858.1 | 0.826                          | 1                        |
| MYOSIN HEAVY CHAIN, SKELETAL MUSCLE, FETAL.                                | 223013                   | IPI00001753.1 | 0.98                           | 1                        |
| MYOSIN LIGHT CHAIN KINASE 2, SKELETAL/CARDIAC MUSCLE.                      | 64554                    | IPI00221127.2 | 1.345                          | 1                        |
| MYOSIN-IXA.                                                                | 292707                   | IPI00160131.1 | 0.51                           | 1                        |
| MYOTUBULARIN-RELATED PROTEIN 6.                                            | 71954                    | IPI00329385.4 | 2.254                          | 1                        |
| NADH DEHYDROGENASE (UBIQUINONE) 1 BETA SUBCOMPLEX, 1, 7KDA .               | 11912                    | IPI00025725.2 | 10.476                         | 1                        |
| NADH-UBIQUINONE OXIDOREDUCTASE 20 KDA SUBUNIT, MITOCHONDRIAL<br>PRECURSOR. | 23580                    | IPI00307749.1 | 6.573                          | 1                        |
| NADH-UBIQUINONE OXIDOREDUCTASE MWFE SUBUNIT.                               | 8072                     | IPI00005695.1 | 18.571                         | 1                        |
| NATURAL KILLER CELL-SPECIFIC ANTIGEN KLIP1.                                | 38213                    | IPI00329688.1 | 7.714                          | 1                        |
| NCAG1.                                                                     | 140273                   | IPI00218081.1 | 2.291                          | 1                        |
| NEBULIN.                                                                   | 773214                   | IPI00303335.1 | 0.27                           | 1                        |

| Protein Description                                          | Molecular Weight<br>(Da) | IPI Number    | Total Sequence<br>Coverage (%) | Total Unique<br>Peptides |
|--------------------------------------------------------------|--------------------------|---------------|--------------------------------|--------------------------|
| NECTIN 3.                                                    | 61002                    | IPI00022959.1 | 4.554                          | 1                        |
| NEDD4 BINDING PROTEIN 1 .                                    | 100379                   | IPI00005667.3 | 1.004                          | 1                        |
| NEURAL STEM CELL-DERIVED DENDRITE REGULATOR.                 | 114952                   | IPI00000706.3 | 2.303                          | 1                        |
| NEUROFILAMENT TRIPLET H PROTEIN.                             | 112479                   | IPI00021751.2 | 2.534                          | 1                        |
| NEUROGENIC LOCUS NOTCH HOMOLOG PROTEIN 2 PRECURSOR.          | 265404                   | IPI00297655.3 | 0.809                          | 1                        |
| NEURON SPECIFIC CALCIUM-BINDING PROTEIN HIPPOCALCIN.         | 22296                    | IPI00219103.3 | 4.167                          | 1                        |
| NEURONAL GROWTH REGULATOR 1 PRECURSOR.                       | 38473                    | IPI00176221.6 | 6.25                           | 1                        |
| NEURONAL KINESIN HEAVY CHAIN.                                | 117392                   | IPI00029722.1 | 3.198                          | 1                        |
| NEURONAL VOLTAGE-DEPENDENT CALCIUM CHANNEL ALPHA 2D SUBUNIT. | 11305                    | IPI00383730.1 | 11.34                          | 1                        |
| NEUTRAL AMINO ACID TRANSPORTER A.                            | 55723                    | IPI00015476.1 | 5.263                          | 1                        |
| NFS1 PROTEIN.                                                | 20607                    | IPI00103063.3 | 18.519                         | 1                        |
| NIBRIN.                                                      | 84959                    | IPI00299463.1 | 2.122                          | 1                        |
| NIDOGEN PRECURSOR.                                           | 136489                   | IPI00026944.1 | 2.326                          | 1                        |
| NIDOGEN-2 PRECURSOR.                                         | 151395                   | IPI00028908.3 | 0.873                          | 1                        |
| NIEMANN-PICK C1 PROTEIN PRECURSOR.                           | 142149                   | IPI00005107.1 | 1.487                          | 1                        |
| NIF3-LIKE PROTEIN 1.                                         | 39005                    | IPI00221202.3 | 5.128                          | 1                        |
| NINJURIN 1.                                                  | 16389                    | IPI00295172.4 | 7.895                          | 1                        |
| N-MYC-INTERACTOR.                                            | 35117                    | IPI00012450.3 | 8.469                          | 1                        |
| NOD9.                                                        | 107664                   | IPI00465264.1 | 2.051                          | 1                        |
| NOGO-INTERACTING MITOCHONDRIAL PROTEIN SHORT ISOFORM.        | 24993                    | IPI00383312.1 | 6.195                          | 1                        |
| NOGO-INTERACTING MITOCHONDRIAL PROTEIN.                      | 43609                    | IPI00291972.1 | 4.798                          | 1                        |
| NONINTEGRIN PLATELET RECEPTOR FOR TYPE I COLLAGEN.           | 60971                    | IPI00385115.1 | 1.128                          | 1                        |
| NON-KINASE CDC42 EFFECTOR PROTEIN SPEC2.                     | 9223                     | IPI00024973.1 | 44.048                         | 1                        |
| NON-NEURONAL SPLICE VARIANT NPTB3.                           | 58084                    | IPI00254162.1 | 1.49                           | 1                        |
| NOP132.                                                      | 132317                   | IPI00161085.4 | 1.108                          | 1                        |
| NOVEL 7 TRANSMEMBRANE RECEPTOR (RHODOPSIN FAMILY) PROTEIN.   | 34890                    | IPI00376314.3 | 6.962                          | 1                        |
| NOVEL PROTEIN (FRAGMENT).                                    | 18522                    | IPI00552281.1 | 10.625                         | 1                        |
| NOVEL PROTEIN.                                               | 78710                    | IPI00002197.2 | 1.306                          | 1                        |
| NOVEL PROTEIN.                                               | 72236                    | IPI00159358.5 | 1.351                          | 1                        |
| NOVEL PROTEIN.                                               | 29757                    | IPI00164170.3 | 5.837                          | 1                        |
| NOVEL PROTEIN.                                               | 28743                    | IPI00301202.5 | 4                              | 1                        |
| NOVEL PROTEIN.                                               | 94224                    | IPI00306483.4 | 3.497                          | 1                        |
| NOVEL PROTEIN.                                               | 26874                    | IPI00382748.2 | 9.717                          | 1                        |
| NOVEL PROTEIN.                                               | 97113                    | IPI00456642.2 | 1.626                          | 1                        |



| Protein Description                          | Molecular Weight<br>(Da) | IPI Number    | Total Sequence<br>Coverage (%) | Total Unique<br>Peptides |
|----------------------------------------------|--------------------------|---------------|--------------------------------|--------------------------|
| NOVEL PROTEIN.                               | 17725                    | IPI00514645.1 | 14.724                         | 1                        |
| NPD001.                                      | 15607                    | IPI00022318.1 | 10.949                         | 1                        |
| NRM PROTEIN.                                 | 29379                    | IPI00217557.1 | 5.344                          | 1                        |
| NUCLEAR FACTOR 1.                            | 58539                    | IPI00029745.2 | 5.827                          | 1                        |
| NUCLEAR PORE MEMBRANE GLYCOPROTEIN 210-LIKE. | 210605                   | IPI00410401.2 | 1.377                          | 1                        |
| NUCLEAR RNA EXPORT FACTOR 1.                 | 70182                    | IPI00033153.1 | 3.393                          | 1                        |
| NUCLEAR TRANSPORT FACTOR 2.                  | 14478                    | IPI00009901.1 | 21.26                          | 1                        |
| NUCLEAR ZINC FINGER PROTEIN NP95.            | 89814                    | IPI00066641.1 | 1.135                          | 1                        |
| NUCLEOLYSIN TIAR.                            | 41591                    | IPI00005615.1 | 6.133                          | 1                        |
| NUCLEOPLASMIN 3.                             | 19344                    | IPI00026496.1 | 8.427                          | 1                        |
| NUCLEOPORIN 43KDA.                           | 48485                    | IPI00171664.2 | 3.401                          | 1                        |
| NUCLEOSIDE DIPHOSPHATE KINASE TYPE 6 .       | 22003                    | IPI00218214.1 | 7.216                          | 1                        |
| OACT2 PROTEIN.                               | 40319                    | IPI00478309.1 | 3.714                          | 1                        |
| OCIAD2 PROTEIN.                              | 11030                    | IPI00181546.4 | 14.141                         | 1                        |
| OEF1.                                        | 184281                   | IPI00217018.2 | 1.133                          | 1                        |
| OLFACTORY RECEPTOR 4B1.                      | 34456                    | IPI00303394.1 | 6.796                          | 1                        |
| OMA1 HOMOLOG, ZINC METALLOPEPTIDASE.         | 60120                    | IPI00061229.1 | 3.053                          | 1                        |
| ORF1A.                                       | 41024                    | IPI00184190.3 | 6.371                          | 1                        |
| OSTEOCLAST STIMULATING FACTOR 1.             | 23799                    | IPI00333434.1 | 5.607                          | 1                        |
| OTTHUMP00000016640 (FRAGMENT).               | 17352                    | IPI00477761.1 | 17.901                         | 1                        |
| OTTHUMP00000016645.                          | 114799                   | IPI00304527.4 | 1.385                          | 1                        |
| OTTHUMP00000016748.                          | 161689                   | IPI00152540.2 | 1.176                          | 1                        |
| OTTHUMP00000016853.                          | 45588                    | IPI00009737.1 | 3.5                            | 1                        |
| OTTHUMP00000017175.                          | 103199                   | IPI00455191.1 | 1.267                          | 1                        |
| OTTHUMP00000021001.                          | 38835                    | IPI00302028.1 | 5.341                          | 1                        |
| OTTHUMP00000021509.                          | 33870                    | IPI00103056.2 | 8.725                          | 1                        |
| OTTHUMP00000021978.                          | 96586                    | IPI00292748.6 | 2.205                          | 1                        |
| OTTHUMP00000022249.                          | 56123                    | IPI00289851.4 | 2.595                          | 1                        |
| OTTHUMP00000022267.                          | 67592                    | IPI00295595.2 | 2.521                          | 1                        |
| OTTHUMP00000022298.                          | 46554                    | IPI00100914.2 | 6                              | 1                        |
| OTTHUMP00000028771.                          | 39515                    | IPI00011618.2 | 2.452                          | 1                        |
| OTTHUMP00000030303.                          | 38918                    | IPI00106573.5 | 6.667                          | 1                        |
| OTTHUMP00000030925.                          | 60589                    | IPI00328867.4 | 2.952                          | 1                        |
| OTTHUMP00000039397.                          | 44339                    | IPI00009913.3 | 2.806                          | 1                        |
| OTTHUMP00000039401.                          | 151557                   | IPI00014843.3 | 1.896                          | 1                        |

| Protein Description                                             | Molecular Weight<br>(Da) | IPI Number    | Total Sequence<br>Coverage (%) | Total Unique<br>Peptides |
|-----------------------------------------------------------------|--------------------------|---------------|--------------------------------|--------------------------|
| OTTHUMP00000039683.                                             | 71930                    | IPI00398117.3 | 1.687                          | 1                        |
| OTTHUMP00000039816.                                             | 283850                   | IPI00293200.2 | 1.024                          | 1                        |
| OTTHUMP00000039822.                                             | 61821                    | IPI00010544.3 | 5.566                          | 1                        |
| OTTHUMP00000040305.                                             | 74977                    | IPI00296353.4 | 3.167                          | 1                        |
| OTTHUMP00000040309.                                             | 19550                    | IPI00386751.2 | 7.647                          | 1                        |
| OTTHUMP00000040501.                                             | 44129                    | IPI00384708.2 | 3.008                          | 1                        |
| OTTHUMP00000042413.                                             | 40773                    | IPI00304809.4 | 6.322                          | 1                        |
| OTTHUMP00000044540.                                             | 58632                    | IPI00021157.2 | 3.509                          | 1                        |
| OTTHUMP00000046384.                                             | 49685                    | IPI00385580.2 | 3.501                          | 1                        |
| OTTHUMP00000063930.                                             | 49677                    | IPI00401281.3 | 4.348                          | 1                        |
| OVARIAN ZINC FINGER PROTEIN.                                    | 27114                    | IPI00216334.3 | 4.237                          | 1                        |
| OXIDORED-NITRO DOMAIN-CONTAINING PROTEIN.                       | 47705                    | IPI00154774.1 | 2.375                          | 1                        |
| OXYSTEROL BINDING PROTEIN-RELATED PROTEIN 10.                   | 83970                    | IPI00032971.2 | 1.44                           | 1                        |
| OXYSTEROL-BINDING PROTEIN.                                      | 12881                    | IPI00001098.2 | 28.947                         | 1                        |
| P532.                                                           | 532186                   | IPI00022479.3 | 0.617                          | 1                        |
| P82.                                                            | 82079                    | IPI00162743.1 | 1.674                          | 1                        |
| PAIRED BOX GENE 2.                                              | 42177                    | IPI00179609.3 | 6.091                          | 1                        |
| PANCREATIC LIPASE RELATED PROTEIN 1 PRECURSOR.                  | 51848                    | IPI00005923.3 | 4.069                          | 1                        |
| PANNEXIN 3.                                                     | 44683                    | IPI00045156.1 | 2.041                          | 1                        |
| PARANEOPLASTIC ANTIGEN.                                         | 52368                    | IPI00395950.1 | 2.832                          | 1                        |
| PARTITIONING DEFECTIVE-6 HOMOLOG BETA.                          | 41182                    | IPI00019025.2 | 4.301                          | 1                        |
| PARX PROTEIN.                                                   | 193422                   | IPI00292471.1 | 1.174                          | 1                        |
| PDZ-LIM PROTEIN.                                                | 39181                    | IPI00007983.2 | 8.743                          | 1                        |
| PEPTIDYL-PROLYL CIS-TRANS ISOMERASE H.                          | 19208                    | IPI00007346.1 | 7.91                           | 1                        |
| PEPTIDYL-PROLYL CIS-TRANS ISOMERASE LIKE 1.                     | 18237                    | IPI00007019.1 | 10.241                         | 1                        |
| PERICENTRIN 1.                                                  | 75019                    | IPI00171542.2 | 2.287                          | 1                        |
| PEROXISOMAL MEMBRANE PROTEIN PEX16.                             | 38643                    | IPI00006722.1 | 3.274                          | 1                        |
| PEROXISOMAL TARGETING SIGNAL 1 RECEPTOR.                        | 66830                    | IPI00032931.1 | 3.654                          | 1                        |
| PEROXISOME ASSEMBLY PROTEIN 26.                                 | 33898                    | IPI00385031.4 | 3.934                          | 1                        |
| PHD FINGER-LIKE DOMAIN PROTEIN 5A.                              | 12405                    | IPI00005511.1 | 13.636                         | 1                        |
| PHOSDUCIN-LIKE PROTEIN.                                         | 34282                    | IPI00298409.3 | 6.645                          | 1                        |
| PHOSPHATIDYLINOSITOL 3-KINASE REGULATORY ALPHA SUBUNIT.         | 83597                    | IPI00021448.1 | 1.657                          | 1                        |
| PHOSPHATIDYLINOSITOL 3-KINASE REGULATORY BETA SUBUNIT.          | 81624                    | IPI00011736.3 | 1.099                          | 1                        |
| PHOSPHATIDYLINOSITOL-3 PHOSPHATE 3-PHOSPHATASE ADAPTOR SUBUNIT. | 86166                    | IPI00061280.2 | 1.606                          | 1                        |

| Protein Description                                                                              | Molecular Weight<br>(Da) | IPI Number    | Total Sequence<br>Coverage (%) | Total Unique<br>Peptides |
|--------------------------------------------------------------------------------------------------|--------------------------|---------------|--------------------------------|--------------------------|
| PHOSPHATIDYLSERINE SYNTHASE 2.                                                                   | 56253                    | IPI00006538.1 | 4.517                          | 1                        |
| PHOSPHOFURIN ACIDIC CLUSTER SORTING PROTEIN 2 .                                                  | 97777                    | IPI00029041.2 | 2.7                            | 1                        |
| PHOSPHOGLYCERATE MUTASE 2.                                                                       | 28635                    | IPI00218570.5 | 8.73                           | 1                        |
| PHOSPHOLIPASE A2 PRECURSOR.                                                                      | 16360                    | IPI00021792.1 | 16.892                         | 1                        |
| PHOSPHORYLASE B KINASE ALPHA REGULATORY CHAIN, LIVER ISOFORM.                                    | 138408                   | IPI00004237.1 | 1.7                            | 1                        |
| PHYHIPL PROTEIN.                                                                                 | 42486                    | IPI00289396.2 | 2.926                          | 1                        |
| PINCH-2 PROTEIN.                                                                                 | 13251                    | IPI00028395.2 | 17.094                         | 1                        |
| PITUITARY TUMOR-TRANSFORMING GENE 1 PROTEIN-INTERACTING PROTEIN<br>PRECURSOR.                    | 20324                    | IPI00023974.1 | 6.667                          | 1                        |
| PKE PROTEIN KINASE.                                                                              | 54994                    | IPI00328835.1 | 3.909                          | 1                        |
| PLASMA GLUTATHIONE PEROXIDASE PRECURSOR.                                                         | 25505                    | IPI00026199.1 | 7.522                          | 1                        |
| PLATELET-ACTIVATING FACTOR ACETYLHYDROLASE 2, CYTOPLASMIC.                                       | 44036                    | IPI00015388.1 | 3.061                          | 1                        |
| PLECKSTRIN HOMOLOGY DOMAIN CONTAINING, FAMILY A<br>(PHOSPHOINOSITIDE BINDING SPECIFIC) MEMBER 1. | 43672                    | IPI00306354.2 | 5.222                          | 1                        |
| PLECKSTRIN HOMOLOGY DOMAIN CONTAINING, FAMILY G, MEMBER 3 .                                      | 128247                   | IPI00291711.4 | 1.118                          | 1                        |
| PLEKHA7 PROTEIN.                                                                                 | 127119                   | IPI00419933.1 | 1.606                          | 1                        |
| PNAS-120.                                                                                        | 22615                    | IPI00023556.2 | 8.763                          | 1                        |
| PODXL2 PROTEIN.                                                                                  | 56635                    | IPI00291300.3 | 1.701                          | 1                        |
| POLY.                                                                                            | 73451                    | IPI00294744.5 | 3.599                          | 1                        |
| POLYADENYLATE-BINDING PROTEIN-INTERACTING PROTEIN 2.                                             | 14984                    | IPI00304483.1 | 23.622                         | 1                        |
| POLYCOMB PROTEIN SUZ12.                                                                          | 83054                    | IPI00299526.6 | 1.894                          | 1                        |
| POSSIBLE INTEGRAL MEMBRANE.                                                                      | 64873                    | IPI00304223.4 | 2.822                          | 1                        |
| POTASSIUM CHANNEL SUBFAMILY K MEMBER 9.                                                          | 42264                    | IPI00014792.1 | 6.417                          | 1                        |
| PQBP-1 PROTEIN.                                                                                  | 30472                    | IPI00024698.1 | 4.528                          | 1                        |
| PRDM8 PROTEIN.                                                                                   | 71709                    | IPI00024952.2 | 2.758                          | 1                        |
| PRE-B-CELL LEUKEMIA TRANSCRIPTION FACTOR-2.                                                      | 45881                    | IPI00028416.1 | 6.047                          | 1                        |
| PREDICTED: G PROTEIN-COUPLED RECEPTOR 108 .                                                      | 60633                    | IPI00299425.2 | 2.578                          | 1                        |
| PREDICTED: HYPOTHETICAL PROTEIN XP_292820 .                                                      | 68357                    | IPI00247674.4 | 3.704                          | 1                        |
| PREDICTED: HYPOTHETICAL PROTEIN XP_373666 .                                                      | 46705                    | IPI00374585.2 | 2.283                          | 1                        |
| PREDICTED: HYPOTHETICAL PROTEIN XP_375430 .                                                      | 31013                    | IPI00401940.2 | 3.636                          | 1                        |
| PREDICTED: HYPOTHETICAL PROTEIN XP_378620 .                                                      | 22112                    | IPI00401509.1 | 6.373                          | 1                        |
| PREDICTED: HYPOTHETICAL PROTEIN XP_379096 .                                                      | 16741                    | IPI00402347.2 | 13.194                         | 1                        |
| PREDICTED: HYPOTHETICAL PROTEIN XP_496251 .                                                      | 16739                    | IPI00455351.1 | 16.774                         | 1                        |
| PREDICTED: HYPOTHETICAL PROTEIN XP_499520 .                                                      | 25883                    | IPI00455097.1 | 12.451                         | 1                        |

| Protein Description                                                                                                                                                                               | Molecular Weight<br>(Da) | IPI Number    | Total Sequence<br>Coverage (%) | Total Unique<br>Peptides |
|---------------------------------------------------------------------------------------------------------------------------------------------------------------------------------------------------|--------------------------|---------------|--------------------------------|--------------------------|
| PREDICTED: JUMONJI DOMAIN CONTAINING 3 .                                                                                                                                                          | 176632                   | IPI00550090.2 | 1.217                          | 1                        |
| PREDICTED: KIAA0493 PROTEIN .                                                                                                                                                                     | 96747                    | IPI00027960.3 | 1.375                          | 1                        |
| PREDICTED: KIAA1731 PROTEIN .                                                                                                                                                                     | 301378                   | IPI00400986.2 | 1.243                          | 1                        |
| PREDICTED: LEUCINE RICH REPEAT AND FIBRONECTIN TYPE III DOMAIN<br>CONTAINING 1 .                                                                                                                  | 82318                    | IPI00022107.2 | 3.372                          | 1                        |
| PREDICTED: MELANOMA ASSOCIATED GENE .                                                                                                                                                             | 175128                   | IPI00016112.3 | 1.216                          | 1                        |
| PREDICTED: RUN AND TBC1 DOMAIN CONTAINING 2 .                                                                                                                                                     | 114200                   | IPI00152865.2 | 1.291                          | 1                        |
| PREDICTED: SEC15-LIKE 2 .                                                                                                                                                                         | 102055                   | IPI00294133.5 | 1.914                          | 1                        |
| PREDICTED: SIMILAR TO 3-PHOSPHOINOSITIDE DEPENDENT PROTEIN KINASE-<br>1 (HPDK1) .                                                                                                                 | 47360                    | IPI00455277.1 | 5.882                          | 1                        |
| PREDICTED: SIMILAR TO 40S RIBOSOMAL PROTEIN SA (P40) (34/67 KDA<br>LAMININ RECEPTOR) (COLON CARCINOMA LAMININ-BINDING PROTEIN)<br>(NEM/1CHD4) (MULTIDRUG RESISTANCE-ASSOCIATED PROTEIN MGR1-AG) . | 32601                    | IPI00397774.1 | 7.823                          | 1                        |
| PREDICTED: SIMILAR TO 60S RIBOSOMAL PROTEIN L10 (QM PROTEIN) (TUMOR<br>SUPPRESSOR QM) (LAMININ RECEPTOR HOMOLOG) .                                                                                | 16298                    | IPI00376188.2 | 8.667                          | 1                        |
| PREDICTED: SIMILAR TO 60S RIBOSOMAL PROTEIN L21 .                                                                                                                                                 | 11456                    | IPI00144142.1 | 8                              | 1                        |
| PREDICTED: SIMILAR TO 60S RIBOSOMAL PROTEIN L23A .                                                                                                                                                | 13784                    | IPI00396949.1 | 9.091                          | 1                        |
| PREDICTED: SIMILAR TO 60S RIBOSOMAL PROTEIN L32 .                                                                                                                                                 | 52304                    | IPI00455900.1 | 1.67                           | 1                        |
| PREDICTED: SIMILAR TO 60S RIBOSOMAL PROTEIN L7A (SURFEIT LOCUS<br>PROTEIN 3) (PLA-X POLYPEPTIDE) .                                                                                                | 28937                    | IPI00457189.1 | 7.031                          | 1                        |
| PREDICTED: SIMILAR TO BA110H4.2 (SIMILAR TO MEMBRANE PROTEIN) .                                                                                                                                   | 37782                    | IPI00401122.2 | 4.928                          | 1                        |
| PREDICTED: SIMILAR TO BCL-2-INTERACTING PROTEIN BECLIN .                                                                                                                                          | 63181                    | IPI00457355.1 | 4.594                          | 1                        |
| PREDICTED: SIMILAR TO BETA-GLUCURONIDASE PRECURSOR (BETA-G1) .                                                                                                                                    | 46772                    | IPI00455856.1 | 6.938                          | 1                        |
| PREDICTED: SIMILAR TO CELL DIVISION PROTEIN KINASE 5 (TAU PROTEIN<br>KINASE II CATALYTIC SUBUNIT) (TPKII CATALYTIC SUBUNIT)<br>(SERINE/THREONINE-PROTEIN KINASE PSSALRE) .                        | 35141                    | IPI00455899.1 | 6.472                          | 1                        |
| PREDICTED: SIMILAR TO DYNEIN, CYTOPLASMIC, LIGHT PEPTIDE.                                                                                                                                         | 42796                    | IPI00455054.1 | 2.302                          | 1                        |
| PREDICTED: SIMILAR TO GLYCERALDEHYDE 3-PHOSPHATE<br>DEHYDROGENASE, LIVER (GAPDH) .                                                                                                                | 29995                    | IPI00457331.1 | 8.55                           | 1                        |
| PREDICTED: SIMILAR TO HEAT SHOCK PROTEIN HSP 90-BETA (HSP 84)<br>(TUMOR SPECIFIC TRANSPLANTATION 84 KDA ANTIGEN) (TSTA) .                                                                         | 30683                    | IPI00397272.2 | 5.575                          | 1                        |
| PREDICTED: SIMILAR TO HETEROGENEOUS NUCLEAR RIBONUCLEOPROTEIN<br>A1 (HELIX-DESTABILIZING PROTEIN) (SINGLE-STRAND BINDING PROTEIN)<br>(HNRNP CORE PROTEIN A1) (HDP) .                              | 24292                    | IPI00456930.1 | 8.772                          | 1                        |

| Protein Description                                                                                                                                                                                   | Molecular Weight<br>(Da) | IPI Number    | Total Sequence<br>Coverage (%) | Total Unique<br>Peptides |
|-------------------------------------------------------------------------------------------------------------------------------------------------------------------------------------------------------|--------------------------|---------------|--------------------------------|--------------------------|
| PREDICTED: SIMILAR TO HETEROGENEOUS NUCLEAR RIBONUCLEOPROTEIN A1 (HELIX-DESTABILIZING PROTEIN) (SINGLE-STRAND BINDING PROTEIN) (HNRNP CORE PROTEIN A1) (HDP-1) (TOPOISOMERASE-INHIBITOR SUPPRESSED) . | 33911                    | IPI00176692.6 | 5.047                          | 1                        |
| PREDICTED: SIMILAR TO HIGH-MOBILITY GROUP NUCLEOSOME BINDING DOMAIN 1 .                                                                                                                               | 10884                    | IPI00094286.2 | 14                             | 1                        |
| PREDICTED: SIMILAR TO HISTIDINE-RICH GLYCOPROTEIN PRECURSOR (HISTIDINE-PROLINE RICH GLYCOPROTEIN) (HPRG) .                                                                                            | 52678                    | IPI00454879.1 | 5.117                          | 1                        |
| PREDICTED: SIMILAR TO HISTONE H3 .                                                                                                                                                                    | 39435                    | IPI00455457.3 | 4.046                          | 1                        |
| PREDICTED: SIMILAR TO HOMEODOMAIN PROTEIN .                                                                                                                                                           | 75898                    | IPI00259834.4 | 2.244                          | 1                        |
| PREDICTED: SIMILAR TO HYPOTHETICAL PROTEIN DKFZP727G131 .                                                                                                                                             | 76034                    | IPI00175182.1 | 1.979                          | 1                        |
| PREDICTED: SIMILAR TO HYPOTHETICAL PROTEIN MGC42415 .                                                                                                                                                 | 117982                   | IPI00455861.1 | 1.687                          | 1                        |
| PREDICTED: SIMILAR TO INTERFERON-INDUCED GUANYLATE-BINDING PROTEIN 1 (GTP-BINDING PROTEIN 1) (GUANINE NUCLEOTIDE-BINDING PROTEIN 1) (HUGBP- 1) .                                                      | 32943                    | IPI00402041.1 | 3.559                          | 1                        |
| PREDICTED: SIMILAR TO KIAA0033 .                                                                                                                                                                      | 70600                    | IPI00552227.1 | 2.955                          | 1                        |
| PREDICTED: SIMILAR TO KIAA1786 PROTEIN .                                                                                                                                                              | 65272                    | IPI00457088.1 | 2.801                          | 1                        |
| PREDICTED: SIMILAR TO KRT8 PROTEIN .                                                                                                                                                                  | 53448                    | IPI00155425.5 | 4.583                          | 1                        |
| PREDICTED: SIMILAR TO LPIN3 .                                                                                                                                                                         | 115638                   | IPI00028551.3 | 1.323                          | 1                        |
| PREDICTED: SIMILAR TO MELANOMA ANTIGEN, FAMILY B, 6 PROTEIN .                                                                                                                                         | 44251                    | IPI00398268.1 | 4.423                          | 1                        |
| PREDICTED: SIMILAR TO NUCLEAR RECEPTOR BINDING FACTOR 2 .                                                                                                                                             | 31742                    | IPI00157913.4 | 10.601                         | 1                        |
| PREDICTED: SIMILAR TO OPA3 PROTEIN.                                                                                                                                                                   | 31110                    | IPI00418368.3 | 12.143                         | 1                        |
| PREDICTED: SIMILAR TO OXIDOREDUCTASE UCPA .                                                                                                                                                           | 26916                    | IPI00398129.3 | 4.878                          | 1                        |
| PREDICTED: SIMILAR TO PATERNALLY EXPRESSED GENE 10 ORF1 .                                                                                                                                             | 63432                    | IPI00455009.1 | 2.289                          | 1                        |
| PREDICTED: SIMILAR TO PLASMA MEMBRANE CALCIUM-TRANSPORTING ATPASE 3 (PMCA3) (PLASMA MEMBRANE CALCIUM PUMP ISOFORM 3) (PLASMA MEMBRANE CALCIUM ATPASE ISOFORM 3) .                                     | 82834                    | IPI00455888.1 | 1.799                          | 1                        |
| PREDICTED: SIMILAR TO PPIA PROTEIN .                                                                                                                                                                  | 19718                    | IPI00376170.2 | 14.917                         | 1                        |
| PREDICTED: SIMILAR TO PROTEIN OF FUNGAL METAZOAN ORIGIN LIKE (11.1 KD) (2C514) .                                                                                                                      | 21355                    | IPI00062298.2 | 5.699                          | 1                        |
| PREDICTED: SIMILAR TO RAB12 PROTEIN .                                                                                                                                                                 | 36315                    | IPI00419932.2 | 2.647                          | 1                        |
| PREDICTED: SIMILAR TO RIBOSOMAL PROTEIN L22 .                                                                                                                                                         | 47531                    | IPI00456782.1 | 6.467                          | 1                        |
| PREDICTED: SIMILAR TO RIBOSOMAL PROTEIN L27A.                                                                                                                                                         | 29189                    | IPI00457343.1 | 3.529                          | 1                        |
| PREDICTED: SIMILAR TO RIKEN CDNA B230396O12 .                                                                                                                                                         | 84263                    | IPI00376181.2 | 2.668                          | 1                        |
| PREDICTED: SIMILAR TO RPL7L1 PROTEIN .                                                                                                                                                                | 24534                    | IPI00402359.1 | 5.069                          | 1                        |

| Protein Description                                                                            | Molecular Weight<br>(Da) | IPI Number    | Total Sequence<br>Coverage (%) | Total Unique<br>Peptides |
|------------------------------------------------------------------------------------------------|--------------------------|---------------|--------------------------------|--------------------------|
| PREDICTED: SIMILAR TO SLC25A5 PROTEIN .                                                        | 37835                    | IPI00454975.2 | 2.874                          | 1                        |
| PREDICTED: SIMILAR TO SUPERVILLIN ISOFORM 2.                                                   | 151134                   | IPI00398883.3 | 1.034                          | 1                        |
| PREDICTED: SIMILAR TO TRANSCRIPTION FACTOR BTF3 (RNA POLYMERASE B<br>TRANSCRIPTION FACTOR 3) . | 18800                    | IPI00101465.5 | 16.374                         | 1                        |
| PREDICTED: SIMILAR TO UBIQUITIN A-52 RESIDUE RIBOSOMAL PROTEIN<br>FUSION PRODUCT 1 .           | 61420                    | IPI00402678.2 | 2.234                          | 1                        |
| PREDICTED: UBIQUITIN SPECIFIC PROTEASE 22 .                                                    | 82918                    | IPI00010365.2 | 1.606                          | 1                        |
| PREDICTED: UBIQUITIN SPECIFIC PROTEASE 24 .                                                    | 285835                   | IPI00398505.4 | 0.867                          | 1                        |
| PREDICTED: ZINC FINGER CCCH TYPE DOMAIN CONTAINING 5 .                                         | 108459                   | IPI00028276.3 | 2.9                            | 1                        |
| PREDICTED: ZUOTIN RELATED FACTOR 1 .                                                           | 59466                    | IPI00293309.3 | 2.692                          | 1                        |
| PRENYLATED RAB ACCEPTOR PROTEIN 1.                                                             | 20648                    | IPI00007909.6 | 7.568                          | 1                        |
| PRESYNAPTIC PROTEIN SAP102.                                                                    | 90344                    | IPI00023343.1 | 2.203                          | 1                        |
| PRO1472.                                                                                       | 17153                    | IPI00383360.1 | 13.548                         | 1                        |
| PROBABLE ATP-DEPENDENT 61 KDA NUCLEOLAR RNA HELICASE.                                          | 61590                    | IPI00302281.1 | 4.936                          | 1                        |
| PROBABLE C->U EDITING ENZYME APOBEC-2.                                                         | 25703                    | IPI00009550.1 | 12.946                         | 1                        |
| PROBABLE ERGOSTEROL BIOSYNTHETIC PROTEIN 28.                                                   | 15864                    | IPI00007730.1 | 10.714                         | 1                        |
| PROBABLE G-PROTEIN COUPLED RECEPTOR 150.                                                       | 46353                    | IPI00303663.1 | 7.143                          | 1                        |
| PROBABLE G-PROTEIN COUPLED RECEPTOR 22.                                                        | 49319                    | IPI00017060.1 | 6.467                          | 1                        |
| PROBABLE INNER MEMBRANE PROTEIN OXA1L2, MITOCHONDRIAL<br>PRECURSOR.                            | 37063                    | IPI00167538.1 | 2.703                          | 1                        |
| PROBABLE MITOCHONDRIAL IMPORT RECEPTOR SUBUNIT TOM7 HOMOLOG.                                   | 6248                     | IPI00000980.1 | 30.909                         | 1                        |
| PROBABLE NUCLEOLAR COMPLEX PROTEIN 14.                                                         | 97668                    | IPI00022613.4 | 1.867                          | 1                        |
| PROBABLE U3 SMALL NUCLEOLAR RNA-ASSOCIATED PROTEIN 11.                                         | 30447                    | IPI00180454.4 | 5.138                          | 1                        |
| PROLARGIN PRECURSOR.                                                                           | 43810                    | IPI00020987.1 | 3.403                          | 1                        |
| PROMININ 1 PRECURSOR.                                                                          | 97202                    | IPI00012540.1 | 1.965                          | 1                        |
| PROSTASIN PRECURSOR.                                                                           | 36764                    | IPI00329538.2 | 4.058                          | 1                        |
| PROTEIN C14ORF21.                                                                              | 69438                    | IPI00216999.2 | 5.346                          | 1                        |
| PROTEIN C6ORF55.                                                                               | 33879                    | IPI00017160.3 | 6.515                          | 1                        |
| PROTEIN FAM18B.                                                                                | 23648                    | IPI00386220.1 | 6.341                          | 1                        |
| PROTEIN FAM20B PRECURSOR.                                                                      | 46432                    | IPI00006657.1 | 2.934                          | 1                        |
| PROTEIN KIAA0406.                                                                              | 122069                   | IPI00011702.4 | 1.745                          | 1                        |
| PROTEIN KIAA0711.                                                                              | 65720                    | IPI00015568.1 | 2.247                          | 1                        |
| PROTEIN KIAA0759.                                                                              | 75276                    | IPI00298147.3 | 2.388                          | 1                        |
| PROTEIN KIAA1173.                                                                              | 56703                    | IPI00289147.3 | 4.762                          | 1                        |

| Protein Description                                                | Molecular Weight<br>(Da) | IPI Number    | Total Sequence<br>Coverage (%) | Total Unique<br>Peptides |
|--------------------------------------------------------------------|--------------------------|---------------|--------------------------------|--------------------------|
| PROTEIN KIAA1434.                                                  | 76035                    | IPI00099820.4 | 1.19                           | 1                        |
| PROTEIN KIAA1472.                                                  | 64598                    | IPI00216464.8 | 3.866                          | 1                        |
| PROTEIN KINASE C AND CASEIN KINASE SUBSTRATE IN NEURONS PROTEIN 1. | 50966                    | IPI00011515.1 | 3.378                          | 1                        |
| PROTEIN KINASE C, D2 TYPE.                                         | 96722                    | IPI00009334.4 | 1.139                          | 1                        |
| PROTEIN KINASE C, DELTA TYPE.                                      | 77477                    | IPI00329236.2 | 1.923                          | 1                        |
| PROTEIN LRP16.                                                     | 35505                    | IPI00155601.1 | 3.077                          | 1                        |
| PROTEIN P65.                                                       | 68620                    | IPI00014168.1 | 1.954                          | 1                        |
| PROTEIN PM1.                                                       | 21541                    | IPI00012855.1 | 8.333                          | 1                        |
| PROTEIN TRANSPORT PROTEIN SEC61 BETA SUBUNIT.                      | 9843                     | IPI00220835.2 | 15.789                         | 1                        |
| PROTEIN TYROSINE PHOSPHATASE PTPCAAX2.                             | 19127                    | IPI00020191.1 | 12.575                         | 1                        |
| PROTEIN TYROSINE PHOSPHATASE, NON-RECEPTOR TYPE 2.                 | 40990                    | IPI00106928.1 | 2.55                           | 1                        |
| PROTEIN Z-DEPENDENT PROTEASE INHIBITOR PRECURSOR.                  | 50707                    | IPI00007199.3 | 4.505                          | 1                        |
| PROTEIN ZERO RELATED PROTEIN.                                      | 29082                    | IPI00022558.1 | 4.089                          | 1                        |
| PROTEIN-TYROSINE SULFOTRANSFERASE 2.                               | 41912                    | IPI00031421.3 | 2.653                          | 1                        |
| PROTEOLIPID PROTEIN 2.                                             | 16691                    | IPI00030362.1 | 8.553                          | 1                        |
| PROTON MYO-INOSITOL COTRANSPORTER.                                 | 68206                    | IPI00044823.1 | 1.908                          | 1                        |
| PRP39 PRE-MRNA PROCESSING FACTOR 39 HOMOLOG .                      | 64285                    | IPI00383823.1 | 2.007                          | 1                        |
| PTDSR PROTEIN (FRAGMENT).                                          | 50510                    | IPI00375496.1 | 2.948                          | 1                        |
| PUTATIVE MAPK ACTIVATING PROTEIN.                                  | 16997                    | IPI00470594.1 | 16.447                         | 1                        |
| PUTATIVE PRE-MRNA SPLICING FACTOR RNA HELICASE.                    | 119392                   | IPI00297178.5 | 0.864                          | 1                        |
| PUTATIVE SPLICEOSOME ASSOCIATED PROTEIN.                           | 26131                    | IPI00025178.1 | 5.778                          | 1                        |
| PV1 PROTEIN.                                                       | 50594                    | IPI00171516.2 | 2.262                          | 1                        |
| PYRROLINE-5-CARBOXYLATE REDUCTASE 1.                               | 33361                    | IPI00550882.2 | 5.643                          | 1                        |
| PYRROLINE-5-CARBOXYLATE REDUCTASE 2.                               | 33637                    | IPI00470610.2 | 5.312                          | 1                        |
| R29893_1 (FRAGMENT).                                               | 24501                    | IPI00328873.2 | 7.87                           | 1                        |
| RAB11-FAMILY INTERACTING PROTEIN 4.                                | 71928                    | IPI00174771.1 | 1.727                          | 1                        |
| RAB31, MEMBER RAS ONCOGENE FAMILY .                                | 21700                    | IPI00014376.3 | 7.179                          | 1                        |
| RAB3A INTERACTING PROTEIN (RABIN3)-LIKE 1.                         | 42637                    | IPI00328884.7 | 5.759                          | 1                        |
| RABPHILIN-3A.                                                      | 76872                    | IPI00032227.1 | 1.585                          | 1                        |
| RAC-ALPHA SERINE/THREONINE-PROTEIN KINASE.                         | 55686                    | IPI00012866.2 | 3.125                          | 1                        |
| RAGB.                                                              | 43218                    | IPI00010317.3 | 2.674                          | 1                        |
| RAN-BINDING PROTEIN 10.                                            | 67257                    | IPI00039864.5 | 1.613                          | 1                        |
| RAP GUANINE NUCLEOTIDE EXCHANGE FACTOR 2.                          | 167417                   | IPI00163931.1 | 1.067                          | 1                        |
| RAPH1 PROTEIN.                                                     | 135242                   | IPI00418201.1 | 0.88                           | 1                        |

| Protein Description                                                    | Molecular Weight<br>(Da) | IPI Number    | Total Sequence<br>Coverage (%) | Total Unique<br>Peptides |
|------------------------------------------------------------------------|--------------------------|---------------|--------------------------------|--------------------------|
| RAS-GRF2 (FRAGMENT).                                                   | 140849                   | IPI00024184.1 | 1.536                          | 1                        |
| RAS-RELATED PROTEIN RAB-17.                                            | 23491                    | IPI00007866.1 | 8.962                          | 1                        |
| RAS-RELATED PROTEIN RAB-22A.                                           | 21855                    | IPI00007756.1 | 5.155                          | 1                        |
| RAS-RELATED PROTEIN RAB-2B.                                            | 24214                    | IPI00102896.1 | 7.87                           | 1                        |
| RAS-RELATED PROTEIN RAB-32.                                            | 24997                    | IPI00014377.1 | 9.333                          | 1                        |
| RAS-RELATED PROTEIN RAB-39A.                                           | 25007                    | IPI00001618.2 | 5.991                          | 1                        |
| RAS-RELATED PROTEIN RAB-39B.                                           | 24622                    | IPI00060801.1 | 7.512                          | 1                        |
| RAS-RELATED PROTEIN RAB-3D.                                            | 24267                    | IPI00032808.1 | 6.849                          | 1                        |
| RAS-RELATED PROTEIN RAB-6B.                                            | 23462                    | IPI00016891.1 | 10.577                         | 1                        |
| RAS-RELATED PROTEIN RAP-1A.                                            | 20987                    | IPI00019345.1 | 14.13                          | 1                        |
| RAVER1.                                                                | 63877                    | IPI00217670.1 | 2.145                          | 1                        |
| RBBP-35.                                                               | 38254                    | IPI00103892.1 | 10.086                         | 1                        |
| RECEPTOR INTERACTING PROTEIN KINASE 5, ISOFORM 2.                      | 100021                   | IPI00396963.2 | 1.471                          | 1                        |
| RECEPTOR-BINDING CANCER ANTIGEN EXPRESSED ON SISO CELLS<br>(FRAGMENT). | 24377                    | IPI00299076.1 | 8.92                           | 1                        |
| RECEPTOR-TYPE TYROSINE-PROTEIN PHOSPHATASE KAPPA PRECURSOR.            | 162088                   | IPI00015756.1 | 0.834                          | 1                        |
| REGULATOR OF G-PROTEIN SIGNALING 3.                                    | 67282                    | IPI00385923.2 | 3.987                          | 1                        |
| RETINAL DEGENERATION B BETA.                                           | 38300                    | IPI00018284.3 | 6.325                          | 1                        |
| RETINOBLASTOMA-ASSOCIATED PROTEIN.                                     | 106159                   | IPI00302829.3 | 2.586                          | 1                        |
| RGS19-INTERACTING PROTEIN 1.                                           | 36049                    | IPI00024705.1 | 4.505                          | 1                        |
| RHO GDP-DISSOCIATION INHIBITOR 1.                                      | 23207                    | IPI00003815.1 | 9.314                          | 1                        |
| RHO GDP-DISSOCIATION INHIBITOR 2.                                      | 22988                    | IPI00003817.1 | 8.458                          | 1                        |
| RHO GUANINE EXCHANGE FACTOR (GEF) 16.                                  | 80105                    | IPI00550506.2 | 1.551                          | 1                        |
| RHO-RELATED GTP-BINDING PROTEIN RHOG.                                  | 21309                    | IPI00017342.1 | 9.948                          | 1                        |
| RIBOFLAVIN KINASE.                                                     | 18410                    | IPI00099995.3 | 6.79                           | 1                        |
| RIBONUCLEASE UK114.                                                    | 14494                    | IPI00005038.1 | 11.679                         | 1                        |
| RIBONUCLEASES P/MRP PROTEIN SUBUNIT POP1.                              | 114709                   | IPI00293331.3 | 1.66                           | 1                        |
| RIBOSOMAL PROTEIN L33-LIKE PROTEIN.                                    | 7619                     | IPI00006864.3 | 10.769                         | 1                        |
| RIBOSOME BIOGENESIS PROTEIN BMS1 HOMOLOG.                              | 145807                   | IPI00006099.1 | 1.014                          | 1                        |
| RING FINGER PROTEIN 12.                                                | 68528                    | IPI00060628.2 | 2.724                          | 1                        |
| RING FINGER PROTEIN 14.                                                | 53837                    | IPI00003606.3 | 2.321                          | 1                        |
| RNA POLYMERASE II ELONGATION FACTOR ELL.                               | 68265                    | IPI00023467.1 | 1.771                          | 1                        |
| RNA POLYMERASE II TERMINATION FACTOR.                                  | 129607                   | IPI00290812.1 | 1.119                          | 1                        |
| RNA-BINDING PROTEIN 28.                                                | 85606                    | IPI00304187.3 | 1.451                          | 1                        |



| Protein Description                                                                     | Molecular Weight<br>(Da) | IPI Number    | Total Sequence<br>Coverage (%) | Total Unique<br>Peptides |
|-----------------------------------------------------------------------------------------|--------------------------|---------------|--------------------------------|--------------------------|
| RNA-BINDING PROTEIN 5.                                                                  | 92154                    | IPI00005036.1 | 1.104                          | 1                        |
| RNA-BINDING PROTEIN MUSASHI HOMOLOG 1.                                                  | 39125                    | IPI00001007.1 | 9.392                          | 1                        |
| RNF170 PROTEIN.                                                                         | 22154                    | IPI00166853.3 | 8.5                            | 1                        |
| RPEL REPEAT CONTAINING PROTEIN.                                                         | 79129                    | IPI00217851.2 | 1.966                          | 1                        |
| RUN AND TBC1 DOMAIN CONTAINING 1.                                                       | 118203                   | IPI00293361.3 | 2.474                          | 1                        |
| S100 CALCIUM-BINDING PROTEIN A14.                                                       | 11662                    | IPI00010214.1 | 14.423                         | 1                        |
| SAC3/GANP FAMILY PROTEIN.                                                               | 86129                    | IPI00177888.2 | 3.723                          | 1                        |
| SAMD11 PROTEIN.                                                                         | 50455                    | IPI00166122.3 | 3.542                          | 1                        |
| S-ARRESTIN.                                                                             | 45092                    | IPI00021353.1 | 4.691                          | 1                        |
| SAYY8238.                                                                               | 108061                   | IPI00432771.1 | 2.532                          | 1                        |
| SEC13-LIKE 1 ISOFORM A .                                                                | 35857                    | IPI00375370.1 | 3.385                          | 1                        |
| SECRETED CEMENT GLAND PROTEIN XAG-2 HOMOLOG.                                            | 19979                    | IPI00007427.1 | 16                             | 1                        |
| SECRETED FRIZZLED-RELATED PROTEIN 1 PRECURSOR.                                          | 35386                    | IPI00384783.2 | 3.822                          | 1                        |
| SEGMENT POLARITY PROTEIN DISHEVELLED HOMOLOG DVL-2.                                     | 78948                    | IPI00023103.1 | 1.63                           | 1                        |
| SELENOPROTEIN O.                                                                        | 73442                    | IPI00031666.3 | 2.99                           | 1                        |
| SELENOPROTEIN T PRECURSOR.                                                              | 22277                    | IPI00008351.2 | 6.154                          | 1                        |
| SEMAPHORIN 3E PRECURSOR.                                                                | 89228                    | IPI00004494.1 | 2.065                          | 1                        |
| SEMAPHORIN 6D ISOFORM 2.                                                                | 111730                   | IPI00170551.1 | 1.002                          | 1                        |
| SENTRIN-SPECIFIC PROTEASE 3.                                                            | 64857                    | IPI00171525.1 | 2.439                          | 1                        |
| SERINE PALMITOYLTRANSFERASE 2.                                                          | 62924                    | IPI00005751.1 | 3.381                          | 1                        |
| SERINE RACEMASE.                                                                        | 36566                    | IPI00030328.1 | 5.588                          | 1                        |
| SERINE/THREONINE KINASE TAO1.                                                           | 116070                   | IPI00002232.2 | 1.499                          | 1                        |
| SERINE/THREONINE PROTEIN KINASE.                                                        | 92688                    | IPI00000977.1 | 1.653                          | 1                        |
| SERINE/THREONINE PROTEIN PHOSPHATASE 2A, 56 KDA REGULATORY<br>SUBUNIT, EPSILON ISOFORM. | 54699                    | IPI00002853.1 | 2.998                          | 1                        |
| SERINE/THREONINE-PROTEIN KINASE 10.                                                     | 112748                   | IPI00304742.4 | 2.977                          | 1                        |
| SERINE/THREONINE-PROTEIN KINASE 11.                                                     | 48636                    | IPI00219072.5 | 3.695                          | 1                        |
| SERINE/THREONINE-PROTEIN KINASE 38-LIKE.                                                | 54003                    | IPI00237011.5 | 5.172                          | 1                        |
| SERINE/THREONINE-PROTEIN KINASE CHK2.                                                   | 60915                    | IPI00014072.1 | 2.947                          | 1                        |
| SERINE/THREONINE-PROTEIN KINASE SGK3.                                                   | 57108                    | IPI00172585.1 | 5.444                          | 1                        |
| SERINE/THREONINE-PROTEIN KINASE VRK1.                                                   | 45476                    | IPI00019640.1 | 5.556                          | 1                        |
| SERINE-PROTEIN KINASE ATM.                                                              | 350644                   | IPI00298306.3 | 0.36                           | 1                        |
| SEROTRANSFERRIN PRECURSOR.                                                              | 77050                    | IPI00022463.1 | 1.862                          | 1                        |
| SERUM PARAOXONASE/LACTONASE 3.                                                          | 39607                    | IPI00299778.2 | 4.52                           | 1                        |
| SET AND MYND DOMAIN CONTAINING 3.                                                       | 49097                    | IPI00165073.6 | 2.336                          | 1                        |

| Protein Description                                                  | Molecular Weight<br>(Da) | IPI Number    | Total Sequence<br>Coverage (%) | Total Unique<br>Peptides |
|----------------------------------------------------------------------|--------------------------|---------------|--------------------------------|--------------------------|
| SET-BINDING PROTEIN.                                                 | 169633                   | IPI00159049.1 | 1.297                          | 1                        |
| SEVEN TRANSMEMBRANE HELIX RECEPTOR.                                  | 165835                   | IPI00169239.1 | 0.987                          | 1                        |
| SH2D4A PROTEIN.                                                      | 52754                    | IPI00100731.2 | 5.066                          | 1                        |
| SH3 DOMAIN AND TETRATRICOPEPTIDE REPEATS CONTAINING PROTEIN 1.       | 146929                   | IPI00152665.3 | 0.749                          | 1                        |
| SH3 DOMAIN-BINDING GLUTAMIC ACID-RICH-LIKE PROTEIN 2.                | 12326                    | IPI00412272.2 | 13.084                         | 1                        |
| SH3KBP1 BINDING PROTEIN 1.                                           | 76329                    | IPI00163403.5 | 3.96                           | 1                        |
| SHC TRANSFORMING PROTEIN.                                            | 62953                    | IPI00021326.3 | 4.452                          | 1                        |
| SHROOM-RELATED PROTEIN.                                              | 216661                   | IPI00152881.3 | 1.353                          | 1                        |
| SIGNAL TRANSDUCING ADAPTOR MOLECULE 2A.                              | 58164                    | IPI00290542.1 | 4.381                          | 1                        |
| SIMILAR TO 17-BETA-HYDROXYSTEROID DEHYDROGENASE TYPE VII.            | 38843                    | IPI00011970.2 | 3.746                          | 1                        |
| SIMILAR TO CALSYNTENIN-3 PRECURSOR.                                  | 107033                   | IPI00396423.2 | 1.446                          | 1                        |
| SIMILAR TO DIHYDROOROTATE DEHYDROGENASE, MITOCHONDRIAL<br>PRECURSOR. | 43039                    | IPI00024462.2 | 3.526                          | 1                        |
| SIMILAR TO GTP-BINDING PROTEIN REM2.                                 | 37139                    | IPI00167551.1 | 4.706                          | 1                        |
| SIMILAR TO HEPARAN SULFATE 2-SULFOTRANSFERASE.                       | 41871                    | IPI00016849.3 | 5.056                          | 1                        |
| SIMILAR TO KENDRIN.                                                  | 365182                   | IPI00412869.2 | 0.528                          | 1                        |
| SIMILAR TO METALLO-BETA-LACTAMASE SUPERFAMILY PROTEIN.               | 31341                    | IPI00293336.3 | 7.527                          | 1                        |
| SIMILAR TO MOUSE C030006K11RIK PROTEIN.                              | 23875                    | IPI00166638.2 | 9.259                          | 1                        |
| SIMILAR TO MOUSE D10ERTD802E PROTEIN.                                | 103709                   | IPI00396218.2 | 1.076                          | 1                        |
| SIMILAR TO PROTEIN INHIBITOR OF ACTIVATED STAT PROTEIN 1.            | 72203                    | IPI00220424.5 | 3.063                          | 1                        |
| SIMILAR TO RIKEN CDNA 3000004N20.                                    | 89028                    | IPI00217626.2 | 1.802                          | 1                        |
| SIMILAR TO ZINC FINGER PROTEIN 43.                                   | 64266                    | IPI00411667.1 | 4.874                          | 1                        |
| SIN3B LONG ISOFORM.                                                  | 133066                   | IPI00464980.3 | 1.377                          | 1                        |
| SINGLE-STRAND SELECTIVE MONOFUNCTIONAL URACIL DNA GLYCOSYLASE.       | 29862                    | IPI00003780.1 | 4.444                          | 1                        |
| SITPEC PROTEIN.                                                      | 33214                    | IPI00063188.1 | 5.068                          | 1                        |
| SJOGREN'S SYNDROME/SCLERODERMA AUTOANTIGEN 1.                        | 21474                    | IPI00028412.1 | 15.578                         | 1                        |
| SLAP-2 HOMOLOG.                                                      | 52028                    | IPI00026691.2 | 4.444                          | 1                        |
| SMALL INDUCIBLE CYTOKINE A16 PRECURSOR.                              | 13600                    | IPI00006717.1 | 13.333                         | 1                        |
| SMALL INDUCIBLE CYTOKINE A19 PRECURSOR.                              | 10993                    | IPI00017761.1 | 22.449                         | 1                        |
| SMALL INDUCIBLE CYTOKINE B6 PRECURSOR.                               | 11897                    | IPI00008079.1 | 7.895                          | 1                        |
| SMALL NUCLEAR RIBONUCLEOPROTEIN F.                                   | 9725                     | IPI00220528.6 | 15.116                         | 1                        |
| SMAP-4.                                                              | 51732                    | IPI00152959.1 | 2.361                          | 1                        |
| SMARCA4 ISOFORM 2.                                                   | 188149                   | IPI00029822.1 | 1.31                           | 1                        |

| Protein Description                                                        | Molecular Weight<br>(Da) | IPI Number    | Total Sequence<br>Coverage (%) | Total Unique<br>Peptides |
|----------------------------------------------------------------------------|--------------------------|---------------|--------------------------------|--------------------------|
| SMYD FAMILY MEMBER 5.                                                      | 46980                    | IPI00013789.4 | 2.657                          | 1                        |
| SNF7 HOMOLOGUE ASSOCIATED WITH ALIX 2 .                                    | 29804                    | IPI00023068.3 | 5.283                          | 1                        |
| SODIUM BICARBONATE COTRANSPORTER2.                                         | 114205                   | IPI00021058.1 | 1.67                           | 1                        |
| SODIUM/CALCIUM EXCHANGER 2 PRECURSOR.                                      | 100368                   | IPI00010343.3 | 2.714                          | 1                        |
| SODIUM/HYDROGEN EXCHANGER 1.                                               | 90763                    | IPI00020060.1 | 1.472                          | 1                        |
| SODIUM/POTASSIUM-TRANSPORTING ATPASE BETA-3 CHAIN.                         | 31513                    | IPI00008167.1 | 3.943                          | 1                        |
| SOLUTE CARRIER FAMILY 2, FACILITATED GLUCOSE TRANSPORTER, MEMBER 3.        | 53924                    | IPI00003909.1 | 2.218                          | 1                        |
| SOLUTE CARRIER FAMILY 4 SODIUM BICARBONATE COTRANSPORTER-LIKE MEMBER 10.   | 125946                   | IPI00004944.2 | 2.504                          | 1                        |
| SOLUTE CARRIER FAMILY 9 ISOFORM 3 REGULATOR 2 .                            | 49340                    | IPI00385034.4 | 3.111                          | 1                        |
| SORTING NEXIN 17.                                                          | 52901                    | IPI00014219.1 | 3.404                          | 1                        |
| SORTING NEXIN 18.                                                          | 68880                    | IPI00045219.1 | 2.707                          | 1                        |
| SPERM PROTEIN ASSOCIATED WITH THE NUCLEUS ON THE X CHROMOSOME C.           | 11002                    | IPI00006961.1 | 13.402                         | 1                        |
| SPERMATID PERINUCLEAR RNA-BINDING PROTEIN.                                 | 73765                    | IPI00169430.1 | 1.783                          | 1                        |
| SPERMATOGENESIS ASSOCIATED 5-LIKE 1.                                       | 80682                    | IPI00031608.1 | 2.523                          | 1                        |
| SPINDLE ASSEMBLY ASSOCIATED SFI1 HOMOLOG ISOFORM A .                       | 147664                   | IPI00001348.5 | 1.61                           | 1                        |
| SPINDLIN FAMILY, MEMBER 3.                                                 | 29207                    | IPI00174535.6 | 6.589                          | 1                        |
| SPINL PROTEIN.                                                             | 56656                    | IPI00012486.2 | 4.545                          | 1                        |
| SPLICE ISOFORM 1 OF 6-PHOSPHOFRUCTO-2-KINASE/FRUCTOSE-2,6-BIPHOSPHATASE 2. | 58477                    | IPI00305589.3 | 3.168                          | 1                        |
| SPLICE ISOFORM 1 OF ACTIVATING SIGNAL COINTEGRATOR 1 COMPLEX SUBUNIT 3.    | 251490                   | IPI00430472.1 | 0.681                          | 1                        |
| SPLICE ISOFORM 1 OF ADAM 9 PRECURSOR.                                      | 90556                    | IPI00440932.1 | 0.977                          | 1                        |
| SPLICE ISOFORM 1 OF ADAPTER-RELATED PROTEIN COMPLEX 1 SIGMA 1A SUBUNIT.    | 18733                    | IPI00152898.1 | 10.127                         | 1                        |
| SPLICE ISOFORM 1 OF ADAPTIN EAR-BINDING COAT-ASSOCIATED PROTEIN 1.         | 29737                    | IPI00170916.1 | 9.818                          | 1                        |
| SPLICE ISOFORM 1 OF ADSEVERIN.                                             | 80489                    | IPI00002606.5 | 2.098                          | 1                        |
| SPLICE ISOFORM 1 OF ALPHA-.                                                | 66516                    | IPI00004668.1 | 2.435                          | 1                        |
| SPLICE ISOFORM 1 OF ALPHA-ENDOSULFINE.                                     | 13389                    | IPI00383552.4 | 14.876                         | 1                        |
| SPLICE ISOFORM 1 OF ALSIN.                                                 | 183666                   | IPI00295004.3 | 0.845                          | 1                        |
| SPLICE ISOFORM 1 OF AMINOPEPTIDASE O.                                      | 93572                    | IPI00163493.4 | 1.221                          | 1                        |
| SPLICE ISOFORM 1 OF ANKYRIN 2.                                             | 430344                   | IPI00007834.1 | 0.331                          | 1                        |

| Protein Description                                                                  | Molecular Weight<br>(Da) | IPI Number    | Total Sequence<br>Coverage (%) | Total Unique<br>Peptides |
|--------------------------------------------------------------------------------------|--------------------------|---------------|--------------------------------|--------------------------|
| SPLICE ISOFORM 1 OF ANKYRIN REPEAT DOMAIN PROTEIN 12.                                | 235666                   | IPI00448465.1 | 0.582                          | 1                        |
| SPLICE ISOFORM 1 OF AP1 GAMMA SUBUNIT-BINDING PROTEIN 1.                             | 140653                   | IPI00297931.3 | 1.065                          | 1                        |
| SPLICE ISOFORM 1 OF ATP-DEPENDENT METALLOPROTEASE YME1L1.                            | 86455                    | IPI00045946.4 | 2.587                          | 1                        |
| SPLICE ISOFORM 1 OF ATROPHIN-1 INTERACTING PROTEIN 1.                                | 158753                   | IPI00248069.5 | 0.893                          | 1                        |
| SPLICE ISOFORM 1 OF BARDET-BIEDL SYNDROME 7 PROTEIN.                                 | 80338                    | IPI00293235.3 | 1.958                          | 1                        |
| SPLICE ISOFORM 1 OF BETA-CATENIN-LIKE PROTEIN 1.                                     | 65173                    | IPI00411636.1 | 1.421                          | 1                        |
| SPLICE ISOFORM 1 OF BROMODOMAIN-CONTAINING PROTEIN 3.                                | 79542                    | IPI00014266.1 | 3.719                          | 1                        |
| SPLICE ISOFORM 1 OF BROMODOMAIN-CONTAINING PROTEIN 4.                                | 152219                   | IPI00440727.1 | 1.101                          | 1                        |
| SPLICE ISOFORM 1 OF CALCIUM/CALMODULIN-DEPENDENT PROTEIN KINASE KINASE 1.            | 55735                    | IPI00017083.4 | 6.139                          | 1                        |
| SPLICE ISOFORM 1 OF CARBAMOYL-PHOSPHATE SYNTHASE [AMMONIA], MITOCHONDRIAL PRECURSOR. | 164939                   | IPI00011062.1 | 1.2                            | 1                        |
| SPLICE ISOFORM 1 OF CENTAURIN GAMMA 2.                                               | 94484                    | IPI00456242.1 | 1.284                          | 1                        |
| SPLICE ISOFORM 1 OF CHONDROITIN BETA-1,4-N-ACETYL GALACTOSAMINYLTRANSFERASE 1.       | 61351                    | IPI00216738.4 | 5.263                          | 1                        |
| SPLICE ISOFORM 1 OF CIRHIN.                                                          | 76890                    | IPI00239815.7 | 1.312                          | 1                        |
| SPLICE ISOFORM 1 OF COFACTOR REQUIRED FOR SP1 TRANSCRIPTIONAL ACTIVATION SUBUNIT 3.  | 156474                   | IPI00413271.3 | 0.804                          | 1                        |
| SPLICE ISOFORM 1 OF CONTACTIN 1 PRECURSOR.                                           | 113320                   | IPI00029751.1 | 1.375                          | 1                        |
| SPLICE ISOFORM 1 OF COP9 SIGNALOSOME COMPLEX SUBUNIT 7B.                             | 29622                    | IPI00009301.1 | 3.788                          | 1                        |
| SPLICE ISOFORM 1 OF C-REACTIVE PROTEIN PRECURSOR.                                    | 25039                    | IPI00022389.1 | 3.125                          | 1                        |
| SPLICE ISOFORM 1 OF CYSTATHIONINE GAMMA-LYASE.                                       | 44508                    | IPI00031557.2 | 7.407                          | 1                        |
| SPLICE ISOFORM 1 OF CYTOHESIN 2.                                                     | 46546                    | IPI00015228.1 | 4.75                           | 1                        |
| SPLICE ISOFORM 1 OF DAZ-ASSOCIATED PROTEIN 1.                                        | 43383                    | IPI00165230.1 | 3.686                          | 1                        |
| SPLICE ISOFORM 1 OF DISKS LARGE-ASSOCIATED PROTEIN 2 (FRAGMENT).                     | 113782                   | IPI00033086.3 | 3.14                           | 1                        |
| SPLICE ISOFORM 1 OF DISKS LARGE-ASSOCIATED PROTEIN 4.                                | 107579                   | IPI00007138.1 | 1.112                          | 1                        |
| SPLICE ISOFORM 1 OF DNA-DIRECTED RNA POLYMERASE I 40 KDA POLYPEPTIDE.                | 39250                    | IPI00005179.1 | 6.069                          | 1                        |
| SPLICE ISOFORM 1 OF DNA-REPAIR PROTEIN XRCC4.                                        | 38287                    | IPI00007672.1 | 2.976                          | 1                        |
| SPLICE ISOFORM 1 OF DOCKING PROTEIN 1.                                               | 52392                    | IPI00015287.1 | 2.911                          | 1                        |
| SPLICE ISOFORM 1 OF DOPAMINE- AND CAMP-REGULATED NEURONAL PHOSPHOPROTEIN.            | 22963                    | IPI00003363.2 | 7.843                          | 1                        |
| SPLICE ISOFORM 1 OF ENDOMUCIN PRECURSOR.                                             | 27452                    | IPI00452565.1 | 5.364                          | 1                        |
| SPLICE ISOFORM 1 OF ENGULFMENT AND CELL MOTILITY PROTEIN 2.                          | 82615                    | IPI00260090.2 | 2.083                          | 1                        |

| Protein Description                                                              | Molecular Weight<br>(Da) | IPI Number    | Total Sequence<br>Coverage (%) | Total Unique<br>Peptides |
|----------------------------------------------------------------------------------|--------------------------|---------------|--------------------------------|--------------------------|
| SPLICE ISOFORM 1 OF EPITHELIAL DISCOIDIN DOMAIN RECEPTOR 1 PRECURSOR.            | 101128                   | IPI00001477.1 | 1.314                          | 1                        |
| SPLICE ISOFORM 1 OF EPSIN 2.                                                     | 68554                    | IPI00397379.1 | 4.517                          | 1                        |
| SPLICE ISOFORM 1 OF EPSIN 4.                                                     | 68259                    | IPI00291930.5 | 2.24                           | 1                        |
| SPLICE ISOFORM 1 OF ESTROGEN RECEPTOR BETA.                                      | 59216                    | IPI00023212.1 | 4.151                          | 1                        |
| SPLICE ISOFORM 1 OF EXOSOME COMPONENT 10.                                        | 100831                   | IPI00009464.1 | 1.243                          | 1                        |
| SPLICE ISOFORM 1 OF F-BOX ONLY PROTEIN 38.                                       | 133954                   | IPI00456676.1 | 1.094                          | 1                        |
| SPLICE ISOFORM 1 OF GALACTOCEREBROSIDASE PRECURSOR.                              | 75147                    | IPI00008790.1 | 4.036                          | 1                        |
| SPLICE ISOFORM 1 OF GENERAL TRANSCRIPTION FACTOR 3C POLYPEPTIDE 2.               | 100680                   | IPI00016861.3 | 2.854                          | 1                        |
| SPLICE ISOFORM 1 OF GGA-BINDING PARTNER.                                         | 50033                    | IPI00333908.1 | 4.082                          | 1                        |
| SPLICE ISOFORM 1 OF GPI TRANSAMIDASE COMPONENT PIG-T PRECURSOR.                  | 65700                    | IPI00100030.1 | 2.941                          | 1                        |
| SPLICE ISOFORM 1 OF HISTONE DEACETYLASE 3.                                       | 48848                    | IPI00006187.1 | 2.804                          | 1                        |
| SPLICE ISOFORM 1 OF HIV-1 REV BINDING PROTEIN-LIKE PROTEIN.                      | 48963                    | IPI00418238.1 | 2.703                          | 1                        |
| SPLICE ISOFORM 1 OF HYPOXIA-INDUCIBLE FACTOR 1 ALPHA.                            | 92670                    | IPI00003442.1 | 2.058                          | 1                        |
| SPLICE ISOFORM 1 OF INDUCED MYELOID LEUKEMIA CELL DIFFERENTIATION PROTEIN MCL-1. | 37323                    | IPI00030356.3 | 3.143                          | 1                        |
| SPLICE ISOFORM 1 OF INTERFERON-INDUCED 35 KDA PROTEIN.                           | 31383                    | IPI00008613.2 | 5.614                          | 1                        |
| SPLICE ISOFORM 1 OF ITCHY HOMOLOG E3 UBIQUITIN PROTEIN LIGASE.                   | 102803                   | IPI00061780.1 | 1.107                          | 1                        |
| SPLICE ISOFORM 1 OF KRUEPPEL-LIKE FACTOR 12.                                     | 44256                    | IPI00027024.3 | 6.965                          | 1                        |
| SPLICE ISOFORM 1 OF LAP2 PROTEIN.                                                | 158238                   | IPI00438286.1 | 0.708                          | 1                        |
| SPLICE ISOFORM 1 OF LIGATIN.                                                     | 64733                    | IPI00013160.1 | 3.253                          | 1                        |
| SPLICE ISOFORM 1 OF LIPID PHOSPHATE PHOSPHOHYDROLASE 1.                          | 32156                    | IPI00297037.3 | 8.803                          | 1                        |
| SPLICE ISOFORM 1 OF MAX PROTEIN.                                                 | 18275                    | IPI00018214.1 | 6.875                          | 1                        |
| SPLICE ISOFORM 1 OF MEMBRANE TARGETING TANDEM C2 DOMAIN CONTAINING PROTEIN 1.    | 55257                    | IPI00167811.1 | 2.449                          | 1                        |
| SPLICE ISOFORM 1 OF METHYL-CPG-BINDING DOMAIN PROTEIN 2.                         | 43255                    | IPI00434623.1 | 3.406                          | 1                        |
| SPLICE ISOFORM 1 OF MIDLINE 1 PROTEIN.                                           | 75251                    | IPI00029324.1 | 2.849                          | 1                        |
| SPLICE ISOFORM 1 OF MITOTIC SPINDLE ASSEMBLY CHECKPOINT PROTEIN MAD1.            | 91771                    | IPI00470518.3 | 1.245                          | 1                        |
| SPLICE ISOFORM 1 OF MPS ONE BINDER KINASE ACTIVATOR-LIKE 2.                      | 26927                    | IPI00418248.1 | 4.219                          | 1                        |
| SPLICE ISOFORM 1 OF MPS ONE BINDER KINASE ACTIVATOR-LIKE 3.                      | 26032                    | IPI00386122.4 | 4.444                          | 1                        |
| SPLICE ISOFORM 1 OF MUCIN 1 PRECURSOR.                                           | 122072                   | IPI00013955.1 | 1.355                          | 1                        |
| SPLICE ISOFORM 1 OF MUCOLIPIN-1.                                                 | 65022                    | IPI00452161.3 | 4.828                          | 1                        |

| Protein Description                                                                   | Molecular Weight<br>(Da) | IPI Number    | Total Sequence<br>Coverage (%) | Total Unique<br>Peptides |
|---------------------------------------------------------------------------------------|--------------------------|---------------|--------------------------------|--------------------------|
| SPLICE ISOFORM 1 OF MUF1 PROTEIN.                                                     | 92288                    | IPI00397575.1 | 1.779                          | 1                        |
| SPLICE ISOFORM 1 OF MYELIN BASIC PROTEIN.                                             | 33117                    | IPI00021907.2 | 4.605                          | 1                        |
| SPLICE ISOFORM 1 OF MYELOID/LYMPHOID OR MIXED-LINEAGE LEUKEMIA PROTEIN 4.             | 293515                   | IPI00218823.2 | 0.368                          | 1                        |
| SPLICE ISOFORM 1 OF MYOCARDIN-RELATED TRANSCRIPTION FACTOR B.                         | 118451                   | IPI00335641.2 | 0.733                          | 1                        |
| SPLICE ISOFORM 1 OF MYOSIN VIIA.                                                      | 254406                   | IPI00013193.3 | 0.406                          | 1                        |
| SPLICE ISOFORM 1 OF N-ACETYLMURAMOYL-L-ALANINE AMIDASE PRECURSOR.                     | 62217                    | IPI00163207.1 | 2.431                          | 1                        |
| SPLICE ISOFORM 1 OF N-ACYLSPHINGOSINE AMIDOHYDROLASE-LIKE PRECURSOR.                  | 40032                    | IPI00024083.2 | 2.228                          | 1                        |
| SPLICE ISOFORM 1 OF NDRG2 PROTEIN.                                                    | 40798                    | IPI00008994.2 | 4.043                          | 1                        |
| SPLICE ISOFORM 1 OF NEDD9 INTERACTING PROTEIN WITH CALPONIN HOMOLOGY AND LIM DOMAINS. | 117875                   | IPI00157757.4 | 0.937                          | 1                        |
| SPLICE ISOFORM 1 OF NEOGENIN PRECURSOR.                                               | 159959                   | IPI00023814.1 | 0.958                          | 1                        |
| SPLICE ISOFORM 1 OF NEURABIN-I.                                                       | 123342                   | IPI00008144.2 | 1.093                          | 1                        |
| SPLICE ISOFORM 1 OF NEUROMEDIN B-32 PRECURSOR.                                        | 13256                    | IPI00031753.2 | 12.397                         | 1                        |
| SPLICE ISOFORM 1 OF NEURONAL CELL ADHESION MOLECULE PRECURSOR.                        | 143894                   | IPI00333776.3 | 0.997                          | 1                        |
| SPLICE ISOFORM 1 OF NUCLEOPORIN P58/P45.                                              | 60897                    | IPI00107122.1 | 4.007                          | 1                        |
| SPLICE ISOFORM 1 OF NUMB PROTEIN HOMOLOG.                                             | 70804                    | IPI00028059.1 | 3.533                          | 1                        |
| SPLICE ISOFORM 1 OF PAIRED BOX PROTEIN PAX-6.                                         | 46683                    | IPI00218800.6 | 2.844                          | 1                        |
| SPLICE ISOFORM 1 OF PALLIDIN.                                                         | 19744                    | IPI00018229.3 | 11.047                         | 1                        |
| SPLICE ISOFORM 1 OF PAPPALYSIN-2 PRECURSOR.                                           | 198511                   | IPI00013569.2 | 1.117                          | 1                        |
| SPLICE ISOFORM 1 OF PERIOSTIN PRECURSOR.                                              | 93332                    | IPI00007960.3 | 2.512                          | 1                        |
| SPLICE ISOFORM 1 OF PEROXISOMAL BIOGENESIS FACTOR 19.                                 | 32807                    | IPI00441867.1 | 12.04                          | 1                        |
| SPLICE ISOFORM 1 OF PLECKSTRIN HOMOLOGY DOMAIN-CONTAINING PROTEIN FAMILY A MEMBER 5.  | 127464                   | IPI00029515.3 | 0.986                          | 1                        |
| SPLICE ISOFORM 1 OF POLY.                                                             | 41482                    | IPI00027973.3 | 3.474                          | 1                        |
| SPLICE ISOFORM 1 OF POLYADENYLATE-BINDING PROTEIN-INTERACTING PROTEIN 1.              | 53525                    | IPI00021466.1 | 1.67                           | 1                        |
| SPLICE ISOFORM 1 OF POLYPEPTIDE N-ACETYLGALACTOSAMINYLTRANSFERASE 1.                  | 64219                    | IPI00025818.1 | 1.61                           | 1                        |
| SPLICE ISOFORM 1 OF POLYPEPTIDE N-ACETYLGALACTOSAMINYLTRANSFERASE 3.                  | 72638                    | IPI00004670.1 | 2.844                          | 1                        |

| Protein Description                                                          | Molecular Weight (Da) | IPI Number    | Total Sequence Coverage (%) | Total Unique Peptides |
|------------------------------------------------------------------------------|-----------------------|---------------|-----------------------------|-----------------------|
| SPLICE ISOFORM 1 OF POSITIVE COFACTOR 2 GLUTAMINE/Q-RICH-ASSOCIATED PROTEIN. | 86753                 | IPI00107693.4 | 2.284                       | 1                     |
| SPLICE ISOFORM 1 OF POTASSIUM VOLTAGE-GATED CHANNEL SUBFAMILY KQT MEMBER 1.  | 74699                 | IPI00020502.3 | 1.775                       | 1                     |
| SPLICE ISOFORM 1 OF PRESENILIN 1.                                            | 52668                 | IPI00028077.1 | 2.998                       | 1                     |
| SPLICE ISOFORM 1 OF PROBABLE G-PROTEIN COUPLED RECEPTOR 115.                 | 83830                 | IPI00217998.1 | 4.388                       | 1                     |
| SPLICE ISOFORM 1 OF PROLACTIN RECEPTOR PRECURSOR.                            | 69506                 | IPI00028640.1 | 3.055                       | 1                     |
| SPLICE ISOFORM 1 OF PROLYL 4-HYDROXYLASE ALPHA-1 SUBUNIT PRECURSOR.          | 61049                 | IPI00009923.1 | 3.371                       | 1                     |
| SPLICE ISOFORM 1 OF PROTEIN C11ORF13.                                        | 39945                 | IPI00020179.1 | 2.681                       | 1                     |
| SPLICE ISOFORM 1 OF PROTEIN C14ORF120.                                       | 35894                 | IPI00000162.5 | 11.429                      | 1                     |
| SPLICE ISOFORM 1 OF PROTEIN KIAA1404.                                        | 220227                | IPI00165981.1 | 1.408                       | 1                     |
| SPLICE ISOFORM 1 OF PROTEIN MICAL-3.                                         | 109911                | IPI00177937.5 | 2.254                       | 1                     |
| SPLICE ISOFORM 1 OF PROTEIN O-MANNOSYL-TRANSFERASE 1.                        | 84909                 | IPI00298235.3 | 1.74                        | 1                     |
| SPLICE ISOFORM 1 OF PROTEIN TYROSINE KINASE 2 BETA.                          | 115875                | IPI00029702.1 | 1.388                       | 1                     |
| SPLICE ISOFORM 1 OF PUTATIVE NF-KAPPA-B ACTIVATING PROTEIN KIAA1271.         | 56528                 | IPI00020719.2 | 5.741                       | 1                     |
| SPLICE ISOFORM 1 OF PUTATIVE RNA-BINDING PROTEIN LUC7-LIKE 1.                | 43728                 | IPI00071318.1 | 4.043                       | 1                     |
| SPLICE ISOFORM 1 OF RETINOIC ACID INDUCED PROTEIN 1.                         | 203352                | IPI00449923.1 | 0.787                       | 1                     |
| SPLICE ISOFORM 1 OF RIBULOSE-PHOSPHATE 3-EPIMERASE.                          | 24928                 | IPI00335280.3 | 8.333                       | 1                     |
| SPLICE ISOFORM 1 OF RNA-BINDING PROTEIN NOVA-1.                              | 52056                 | IPI00019244.1 | 2.745                       | 1                     |
| SPLICE ISOFORM 1 OF ROTAVIRUS 'X' ASSOCIATED NON-STRUCTURAL PROTEIN.         | 111578                | IPI00099131.1 | 3.927                       | 1                     |
| SPLICE ISOFORM 1 OF SEC1 FAMILY DOMAIN CONTAINING PROTEIN 2.                 | 75127                 | IPI00419891.3 | 4.24                        | 1                     |
| SPLICE ISOFORM 1 OF SERINE/THREONINE-PROTEIN KINASE RIO3.                    | 59117                 | IPI00298199.1 | 1.927                       | 1                     |
| SPLICE ISOFORM 1 OF SEROLOGICALLY DEFINED BREAST CANCER ANTIGEN NY-BR- 84.   | 43222                 | IPI00006438.1 | 2.872                       | 1                     |
| SPLICE ISOFORM 1 OF SEROLOGICALLY DEFINED COLON CANCER ANTIGEN 1.            | 122970                | IPI00301618.4 | 1.301                       | 1                     |
| SPLICE ISOFORM 1 OF SIALIN.                                                  | 54640                 | IPI00395808.1 | 2.828                       | 1                     |
| SPLICE ISOFORM 1 OF SLIT AND NTRK-LIKE PROTEIN 6 PRECURSOR.                  | 95110                 | IPI00176398.2 | 0.951                       | 1                     |
| SPLICE ISOFORM 1 OF SODIUM/POTASSIUM-TRANSPORTING ATPASE GAMMA CHAIN.        | 7283                  | IPI00008178.2 | 21.212                      | 1                     |
| SPLICE ISOFORM 1 OF SOLUTE CARRIER FAMILY 35 MEMBER E1.                      | 30218                 | IPI00101952.3 | 4.511                       | 1                     |
| SPLICE ISOFORM 1 OF SPECTRIN BETA CHAIN, BRAIN 3.                            | 288985                | IPI00018829.2 | 0.936                       | 1                     |

| Protein Description                                                                   | Molecular Weight<br>(Da) | IPI Number    | Total Sequence<br>Coverage (%) | Total Unique<br>Peptides |
|---------------------------------------------------------------------------------------|--------------------------|---------------|--------------------------------|--------------------------|
| SPLICE ISOFORM 1 OF SPLICING FACTOR, ARGININE/SERINE-RICH 15.                         | 125869                   | IPI00181702.3 | 1.133                          | 1                        |
| SPLICE ISOFORM 1 OF SPLICING FACTOR, ARGININE/SERINE-RICH 16.                         | 75215                    | IPI00013107.1 | 2.124                          | 1                        |
| SPLICE ISOFORM 1 OF SSXT PROTEIN.                                                     | 45929                    | IPI00018069.2 | 2.871                          | 1                        |
| SPLICE ISOFORM 1 OF TELOMERASE PROTEIN COMPONENT 1.                                   | 290415                   | IPI00294519.1 | 0.647                          | 1                        |
| SPLICE ISOFORM 1 OF TNF RECEPTOR ASSOCIATED FACTOR 2.                                 | 55859                    | IPI00030278.4 | 5.988                          | 1                        |
| SPLICE ISOFORM 1 OF TRANSCRIPTION FACTOR 20.                                          | 211799                   | IPI00159322.3 | 1.888                          | 1                        |
| SPLICE ISOFORM 1 OF TRANSCRIPTIONAL ADAPTER 3-LIKE.                                   | 48902                    | IPI00220486.1 | 2.778                          | 1                        |
| SPLICE ISOFORM 1 OF TRANSCRIPTIONAL REPRESSOR P66 ALPHA.                              | 68063                    | IPI00410330.3 | 1.896                          | 1                        |
| SPLICE ISOFORM 1 OF TRANSFORMATION/TRANSCRIPTION DOMAIN-ASSOCIATED PROTEIN.           | 437586                   | IPI00069084.1 | 0.492                          | 1                        |
| SPLICE ISOFORM 1 OF TRANSFORMING ACIDIC COILED-COIL-CONTAINING PROTEIN 2.             | 112111                   | IPI00030033.1 | 2.534                          | 1                        |
| SPLICE ISOFORM 1 OF TRANSMEMBRANE GTPASE MFN1.                                        | 84160                    | IPI00293073.3 | 2.024                          | 1                        |
| SPLICE ISOFORM 1 OF TRANSMEMBRANE PROTEIN 25 PRECURSOR.                               | 39285                    | IPI00162329.2 | 5.191                          | 1                        |
| SPLICE ISOFORM 1 OF TUBERIN.                                                          | 200749                   | IPI00028493.3 | 0.885                          | 1                        |
| SPLICE ISOFORM 1 OF TUMOR PROTEIN D54.                                                | 22238                    | IPI00306825.3 | 6.311                          | 1                        |
| SPLICE ISOFORM 1 OF TUMOR SUPPRESSOR CANDIDATE 3.                                     | 39676                    | IPI00013328.1 | 2.586                          | 1                        |
| SPLICE ISOFORM 1 OF U4/U6 SMALL NUCLEAR RIBONUCLEOPROTEIN PRP3.                       | 77529                    | IPI00005861.1 | 2.635                          | 1                        |
| SPLICE ISOFORM 1 OF UBIQUITIN CONJUGATING ENZYME 7 INTERACTING PROTEIN 3.             | 56381                    | IPI00010266.1 | 2.2                            | 1                        |
| SPLICE ISOFORM 1 OF UBX DOMAIN-CONTAINING PROTEIN 1.                                  | 49754                    | IPI00019276.1 | 6.349                          | 1                        |
| SPLICE ISOFORM 1 OF URIDINE PHOSPHORYLASE 1.                                          | 33934                    | IPI00004406.1 | 3.548                          | 1                        |
| SPLICE ISOFORM 1 OF WILMS' TUMOR 1-ASSOCIATING PROTEIN.                               | 44244                    | IPI00220302.1 | 5.051                          | 1                        |
| SPLICE ISOFORM 1 OF YTH DOMAIN PROTEIN 1.                                             | 60874                    | IPI00221345.1 | 2.326                          | 1                        |
| SPLICE ISOFORM 1 OF ZINC FINGER AND BTB DOMAIN CONTAINING PROTEIN 10.                 | 92444                    | IPI00383132.4 | 0.708                          | 1                        |
| SPLICE ISOFORM 1 OF ZINC FINGER CCCH-TYPE WITH G PATCH DOMAIN PROTEIN.                | 57428                    | IPI00306594.2 | 2.072                          | 1                        |
| SPLICE ISOFORM 1 OF ZINC FINGER PROTEIN 278.                                          | 74060                    | IPI00003801.1 | 3.348                          | 1                        |
| SPLICE ISOFORM 2 OF 1-PHOSPHATIDYLINOSITOL-4,5-BISPHOSPHATE PHOSPHODIESTERASE BETA 4. | 134464                   | IPI00014897.4 | 0.851                          | 1                        |
| SPLICE ISOFORM 2 OF ARF GTPASE-ACTIVATING PROTEIN GIT2.                               | 52577                    | IPI00186690.6 | 3.822                          | 1                        |
| SPLICE ISOFORM 2 OF BAI1-ASSOCIATED PROTEIN 1.                                        | 161610                   | IPI00165946.1 | 0.958                          | 1                        |



| Protein Description                                                                                                | Molecular Weight<br>(Da) | IPI Number    | Total Sequence<br>Coverage (%) | Total Unique<br>Peptides |
|--------------------------------------------------------------------------------------------------------------------|--------------------------|---------------|--------------------------------|--------------------------|
| SPLICE ISOFORM 2 OF BROMODOMAIN ADJACENT TO ZINC FINGER DOMAIN PROTEIN 1A.                                         | 175357                   | IPI00383565.3 | 0.853                          | 1                        |
| SPLICE ISOFORM 2 OF BROMODOMAIN-CONTAINING PROTEIN 8.                                                              | 102839                   | IPI00148057.2 | 2.839                          | 1                        |
| SPLICE ISOFORM 2 OF CATENIN DELTA-2.                                                                               | 126538                   | IPI00220032.1 | 0.857                          | 1                        |
| SPLICE ISOFORM 2 OF CD97 ANTIGEN PRECURSOR.                                                                        | 81715                    | IPI00299412.6 | 2.156                          | 1                        |
| SPLICE ISOFORM 2 OF CYSTEINE PROTEASE APG4B.                                                                       | 54301                    | IPI00180984.2 | 3.742                          | 1                        |
| SPLICE ISOFORM 2 OF DNA TOPOISOMERASE III BETA-1.                                                                  | 82123                    | IPI00216815.1 | 2.055                          | 1                        |
| SPLICE ISOFORM 2 OF ENA/VASODILATOR STIMULATED PHOSPHOPROTEIN-LIKE PROTEIN.                                        | 44620                    | IPI00170979.1 | 2.404                          | 1                        |
| SPLICE ISOFORM 2 OF FAR UPSTREAM ELEMENT BINDING PROTEIN 1.                                                        | 68605                    | IPI00163782.2 | 3.216                          | 1                        |
| SPLICE ISOFORM 2 OF HETEROGENEOUS NUCLEAR RIBONUCLEOPROTEIN D0.                                                    | 36272                    | IPI00220683.1 | 3.571                          | 1                        |
| SPLICE ISOFORM 2 OF LEUCYL-CYSTINYL AMINOPEPTIDASE.                                                                | 115606                   | IPI00221240.2 | 0.989                          | 1                        |
| SPLICE ISOFORM 2 OF NEUROENDOCRINE PROTEIN 7B2 PRECURSOR.                                                          | 23659                    | IPI00470716.1 | 8.057                          | 1                        |
| SPLICE ISOFORM 2 OF NEUROFASCIN PRECURSOR.                                                                         | 88110                    | IPI00394653.1 | 1.269                          | 1                        |
| SPLICE ISOFORM 2 OF NICOTINAMIDE RIBOSIDE KINASE 1.                                                                | 20153                    | IPI00166615.1 | 10.857                         | 1                        |
| SPLICE ISOFORM 2 OF NIPPED-B-LIKE PROTEIN.                                                                         | 304344                   | IPI00026466.3 | 0.482                          | 1                        |
| SPLICE ISOFORM 2 OF PHOSPHATIDYLINOSITOL 4-KINASE ALPHA.                                                           | 96984                    | IPI00031424.1 | 1.522                          | 1                        |
| SPLICE ISOFORM 2 OF PICCOLO PROTEIN.                                                                               | 530966                   | IPI00218524.6 | 0.226                          | 1                        |
| SPLICE ISOFORM 2 OF POTENTIAL PHOSPHOLIPID-TRANSPORTING ATPASE IK.                                                 | 146752                   | IPI00216974.1 | 0.615                          | 1                        |
| SPLICE ISOFORM 2 OF PROBABLE CATION-TRANSPORTING ATPASE 13A3.                                                      | 75447                    | IPI00177661.3 | 2.047                          | 1                        |
| SPLICE ISOFORM 2 OF PROTEIN KIAA1093.                                                                              | 109345                   | IPI00152296.1 | 3.013                          | 1                        |
| SPLICE ISOFORM 2 OF RALBP1 ASSOCIATED EPS DOMAIN CONTAINING PROTEIN 2.                                             | 57902                    | IPI00332687.1 | 3.071                          | 1                        |
| SPLICE ISOFORM 2 OF RHO-GTPASE-ACTIVATING PROTEIN 12.                                                              | 93114                    | IPI00217418.1 | 0.98                           | 1                        |
| SPLICE ISOFORM 2 OF SERINE/THREONINE-PROTEIN KINASE WNK4.                                                          | 73370                    | IPI00398442.1 | 2.564                          | 1                        |
| SPLICE ISOFORM 2 OF SPHINGOMYELIN PHOSPHODIESTERASE PRECURSOR.                                                     | 64989                    | IPI00218784.1 | 3.59                           | 1                        |
| SPLICE ISOFORM 2 OF SWI/SNF-RELATED MATRIX-ASSOCIATED ACTIN-DEPENDENT REGULATOR OF CHROMATIN SUBFAMILY D MEMBER 3. | 53687                    | IPI00106988.1 | 4.894                          | 1                        |
| SPLICE ISOFORM 2 OF SYNAPTIC GLYCOPROTEIN SC2.                                                                     | 18249                    | IPI00301279.3 | 7.643                          | 1                        |
| SPLICE ISOFORM 2 OF SYNAPTOTAGMIN-LIKE PROTEIN 1.                                                                  | 60635                    | IPI00154565.1 | 2                              | 1                        |
| SPLICE ISOFORM 2 OF SYNTENIN 2.                                                                                    | 30742                    | IPI00220217.1 | 3.901                          | 1                        |
| SPLICE ISOFORM 2 OF TRANSCRIPTION FACTOR RFX3.                                                                     | 79357                    | IPI00009298.1 | 1.839                          | 1                        |

| Protein Description                                                              | Molecular Weight<br>(Da) | IPI Number    | Total Sequence<br>Coverage (%) | Total Unique<br>Peptides |
|----------------------------------------------------------------------------------|--------------------------|---------------|--------------------------------|--------------------------|
| SPLICE ISOFORM 2 OF TRANSMEMBRANE GLYCOPROTEIN NMB PRECURSOR.                    | 62643                    | IPI0001592.1  | 3.214                          | 1                        |
| SPLICE ISOFORM 2 OF TRIPARTITE MOTIF 40 PROTEIN.                                 | 26073                    | IPI00152496.2 | 6.987                          | 1                        |
| SPLICE ISOFORM 2 OF TRIPARTITE MOTIF PROTEIN 22.                                 | 56429                    | IPI00477398.1 | 7.287                          | 1                        |
| SPLICE ISOFORM 2 OF VESICLE-ASSOCIATED MEMBRANE PROTEIN 4.                       | 16241                    | IPI00219648.1 | 8.571                          | 1                        |
| SPLICE ISOFORM 3 OF BMP-2 INDUCIBLE PROTEIN KINASE.                              | 75812                    | IPI00033606.5 | 2.216                          | 1                        |
| SPLICE ISOFORM 3 OF CALDESMON.                                                   | 64256                    | IPI00218695.1 | 2.151                          | 1                        |
| SPLICE ISOFORM 3 OF DNA TOPOISOMERASE II, ALPHA ISOZYME.                         | 178712                   | IPI00218753.1 | 0.893                          | 1                        |
| SPLICE ISOFORM 3 OF DNA-DIRECTED RNA POLYMERASES III 80 KDA<br>POLYPEPTIDE.      | 73139                    | IPI00018245.5 | 2.294                          | 1                        |
| SPLICE ISOFORM 3 OF DREBRIN-LIKE PROTEIN.                                        | 49042                    | IPI00101968.3 | 2.961                          | 1                        |
| SPLICE ISOFORM 3 OF FILAMIN-BINDING LIM PROTEIN-1.                               | 30831                    | IPI00290638.3 | 3.261                          | 1                        |
| SPLICE ISOFORM 3 OF NUCLEAR TRANSCRIPTION FACTOR Y SUBUNIT<br>GAMMA.             | 50302                    | IPI00071697.1 | 2.62                           | 1                        |
| SPLICE ISOFORM 3 OF PELLINO PROTEIN HOMOLOG 3.                                   | 43970                    | IPI00167786.1 | 6.897                          | 1                        |
| SPLICE ISOFORM 3 OF PEPTIDYL-GLYCINE ALPHA-AMIDATING<br>MONOOXYGENASE PRECURSOR. | 100818                   | IPI00219042.1 | 2.32                           | 1                        |
| SPLICE ISOFORM 3 OF SERINE/THREONINE-PROTEIN KINASE TOUSLED-LIKE 1.              | 63994                    | IPI00242740.2 | 3.097                          | 1                        |
| SPLICE ISOFORM 4 OF GA BINDING PROTEIN BETA CHAIN.                               | 36950                    | IPI00010301.1 | 2.874                          | 1                        |
| SPLICE ISOFORM 4 OF NESPRIN 1.                                                   | 1005195                  | IPI00247295.3 | 0.149                          | 1                        |
| SPLICE ISOFORM 4 OF PHOSPHORYLASE B KINASE BETA REGULATORY<br>CHAIN.             | 123824                   | IPI00181893.1 | 1.565                          | 1                        |
| SPLICE ISOFORM 4 OF SEIZURE 6-LIKE PROTEIN PRECURSOR.                            | 111782                   | IPI00157417.1 | 0.781                          | 1                        |
| SPLICE ISOFORM 5 OF CALCIUM/CALMODULIN-DEPENDENT PROTEIN KINASE<br>KINASE 2.     | 54813                    | IPI00172426.2 | 3.213                          | 1                        |
| SPLICE ISOFORM 5 OF PROTEIN KINASE C BINDING PROTEIN 1.                          | 130926                   | IPI00216542.1 | 2.034                          | 1                        |
| SPLICE ISOFORM 6 OF UBIQUITIN-CONJUGATING ENZYME E2 VARIANT 1.                   | 11842                    | IPI00007847.1 | 15.534                         | 1                        |
| SPLICE ISOFORM A OF DNAJ HOMOLOG SUBFAMILY B MEMBER 6.                           | 36087                    | IPI00024523.2 | 2.761                          | 1                        |
| SPLICE ISOFORM A OF GC-RICH SEQUENCE DNA-BINDING FACTOR<br>HOMOLOG.              | 104804                   | IPI00001364.2 | 3.272                          | 1                        |
| SPLICE ISOFORM A OF HEPATOCYTE NUCLEAR FACTOR 1-BETA.                            | 61324                    | IPI00020078.1 | 1.257                          | 1                        |
| SPLICE ISOFORM A OF MYOTUBULARIN-RELATED PROTEIN 3.                              | 130561                   | IPI00171273.3 | 1.966                          | 1                        |
| SPLICE ISOFORM A OF RNA-BINDING PROTEIN WITH MULTIPLE SPLICING.                  | 21802                    | IPI00004045.1 | 7.143                          | 1                        |
| SPLICE ISOFORM A OF SOMATOSTATIN RECEPTOR TYPE 2.                                | 41333                    | IPI00027807.1 | 2.439                          | 1                        |

| Protein Description                                                                          | Molecular Weight<br>(Da) | IPI Number    | Total Sequence<br>Coverage (%) | Total Unique<br>Peptides |
|----------------------------------------------------------------------------------------------|--------------------------|---------------|--------------------------------|--------------------------|
| SPLICE ISOFORM ALPHA OF CASPASE-6 PRECURSOR.                                                 | 33310                    | IPI00023876.4 | 3.413                          | 1                        |
| SPLICE ISOFORM ALPHA OF GTP-BINDING PROTEIN ARD-1.                                           | 64067                    | IPI00003328.1 | 1.742                          | 1                        |
| SPLICE ISOFORM ALPHA OF TRANSCRIPTION INTERMEDIARY FACTOR 1-GAMMA.                           | 122521                   | IPI00010252.3 | 1.154                          | 1                        |
| SPLICE ISOFORM ALPHA OF ZINC FINGER PROTEIN GLI2.                                            | 133310                   | IPI00018888.1 | 1.59                           | 1                        |
| SPLICE ISOFORM ALPHA-2 OF N-CHIMAERIN.                                                       | 53876                    | IPI00013488.3 | 3.011                          | 1                        |
| SPLICE ISOFORM ALPHA-6X1X2B OF INTEGRIN ALPHA-6 PRECURSOR.                                   | 126619                   | IPI00010697.1 | 1.15                           | 1                        |
| SPLICE ISOFORM ALPHA-E OF FIBRINOGEN ALPHA/ALPHA-E CHAIN PRECURSOR.                          | 94973                    | IPI00021885.1 | 1.963                          | 1                        |
| SPLICE ISOFORM ATE1-1 OF ARGINYL-TRNA--PROTEIN TRANSFERASE 1.                                | 59090                    | IPI00029472.2 | 2.124                          | 1                        |
| SPLICE ISOFORM B OF CYCLIN T2.                                                               | 81045                    | IPI00030313.1 | 2.055                          | 1                        |
| SPLICE ISOFORM B OF ENDOTHELIN-CONVERTING ENZYME 1.                                          | 87164                    | IPI00002478.1 | 1.818                          | 1                        |
| SPLICE ISOFORM B OF MEMBRANE COFACTOR PROTEIN PRECURSOR.                                     | 44238                    | IPI00219852.2 | 3.258                          | 1                        |
| SPLICE ISOFORM B OF PROTEIN C21ORF58.                                                        | 21412                    | IPI00291921.1 | 9.794                          | 1                        |
| SPLICE ISOFORM BETA OF DNA LIGASE III.                                                       | 95802                    | IPI00000156.1 | 1.624                          | 1                        |
| SPLICE ISOFORM BETA-3B OF INTEGRIN BETA-3 PRECURSOR.                                         | 86269                    | IPI00220350.1 | 3.205                          | 1                        |
| SPLICE ISOFORM BETA-4C OF INTEGRIN BETA-4 PRECURSOR.                                         | 202151                   | IPI00027422.1 | 0.604                          | 1                        |
| SPLICE ISOFORM BI-1-GGCAG OF VOLTAGE-DEPENDENT P/Q-TYPE CALCIUM CHANNEL ALPHA-1A SUBUNIT.    | 282365                   | IPI00012136.1 | 1.038                          | 1                        |
| SPLICE ISOFORM BMP1-3 OF BONE MORPHOGENETIC PROTEIN 1 PRECURSOR.                             | 111249                   | IPI00009054.1 | 1.217                          | 1                        |
| SPLICE ISOFORM C OF POTASSIUM CHANNEL SUBFAMILY K MEMBER 7.                                  | 26822                    | IPI00217050.1 | 13.619                         | 1                        |
| SPLICE ISOFORM GAMMA OF TRANSCRIPTION FACTOR-LIKE PROTEIN 4.                                 | 33300                    | IPI00005661.1 | 4.027                          | 1                        |
| SPLICE ISOFORM GAMMA-1 OF SERINE/THREONINE PROTEIN PHOSPHATASE PP1- GAMMA CATALYTIC SUBUNIT. | 36984                    | IPI00005705.1 | 3.096                          | 1                        |
| SPLICE ISOFORM GAMMA-B OF FIBRINOGEN GAMMA CHAIN PRECURSOR.                                  | 51512                    | IPI00021891.5 | 3.311                          | 1                        |
| SPLICE ISOFORM HMW OF KININOGEN PRECURSOR.                                                   | 71945                    | IPI00032328.1 | 1.398                          | 1                        |
| SPLICE ISOFORM IB OF TYROSINE-PROTEIN KINASE ABL2.                                           | 128343                   | IPI00329488.4 | 0.846                          | 1                        |
| SPLICE ISOFORM IIA OF MYC BOX DEPENDENT INTERACTING PROTEIN 1.                               | 64699                    | IPI00186966.3 | 1.686                          | 1                        |
| SPLICE ISOFORM JM-A OF RECEPTOR TYROSINE-PROTEIN KINASE ERBB-4 PRECURSOR.                    | 146808                   | IPI00016371.1 | 0.917                          | 1                        |
| SPLICE ISOFORM LIMK2A OF LIM DOMAIN KINASE 2.                                                | 72232                    | IPI00022872.1 | 4.702                          | 1                        |
| SPLICE ISOFORM LONG OF 52 KDA REPRESSOR OF THE INHIBITOR OF THE PROTEIN KINASE.              | 87704                    | IPI00012438.1 | 3.154                          | 1                        |

| Protein Description                                                                      | Molecular Weight (Da) | IPI Number    | Total Sequence Coverage (%) | Total Unique Peptides |
|------------------------------------------------------------------------------------------|-----------------------|---------------|-----------------------------|-----------------------|
| SPLICE ISOFORM LONG OF ANCIENT UBIQUITOUS PROTEIN 1 PRECURSOR.                           | 53028                 | IPI0001891.1  | 3.151                       | 1                     |
| SPLICE ISOFORM LONG OF AUTOPHAGY PROTEIN 5-LIKE.                                         | 32447                 | IPI00006800.1 | 6.909                       | 1                     |
| SPLICE ISOFORM LONG OF B-LYMPHOCYTE ANTIGEN PRECURSOR.                                   | 80709                 | IPI00024024.3 | 1.151                       | 1                     |
| SPLICE ISOFORM LONG OF DIACYLGLYCEROL KINASE, ZETA.                                      | 124122                | IPI00013835.3 | 1.074                       | 1                     |
| SPLICE ISOFORM LONG OF DUAL-SPECIFICITY TYROSINE-PHOSPHORYLATION REGULATED KINASE 1A.    | 85584                 | IPI00014344.1 | 2.097                       | 1                     |
| SPLICE ISOFORM LONG OF ENDOTHELIN-3 PRECURSOR.                                           | 25454                 | IPI00025365.1 | 8.824                       | 1                     |
| SPLICE ISOFORM LONG OF HEAT SHOCK FACTOR PROTEIN 1.                                      | 57260                 | IPI00024071.1 | 5.104                       | 1                     |
| SPLICE ISOFORM LONG OF HIRA PROTEIN.                                                     | 111836                | IPI00217560.2 | 2.065                       | 1                     |
| SPLICE ISOFORM LONG OF KELCH REPEAT AND BTB DOMAIN CONTAINING PROTEIN 10.                | 68037                 | IPI00030986.1 | 2.145                       | 1                     |
| SPLICE ISOFORM LONG OF MOTHERS AGAINST DECAPENTAPLEGIC HOMOLOG 2.                        | 52306                 | IPI00019548.1 | 2.355                       | 1                     |
| SPLICE ISOFORM LONG OF PROTEIN C21ORF2.                                                  | 28340                 | IPI00014472.1 | 4.297                       | 1                     |
| SPLICE ISOFORM LONG OF RAS-RELATED PROTEIN RAB-27A.                                      | 24860                 | IPI00016381.1 | 5.882                       | 1                     |
| SPLICE ISOFORM LONG OF SIGNAL TRANSDUCTION PROTEIN CBL-B.                                | 109480                | IPI00292856.3 | 2.138                       | 1                     |
| SPLICE ISOFORM LONG OF THYMIDINE KINASE 2, MITOCHONDRIAL PRECURSOR.                      | 31142                 | IPI00010392.2 | 5.263                       | 1                     |
| SPLICE ISOFORM LONG OF TRANSCRIPTION FACTOR COE3.                                        | 64864                 | IPI00024242.3 | 3.859                       | 1                     |
| SPLICE ISOFORM LONG OF VACUOLAR ASSEMBLY PROTEIN VPS41 HOMOLOG.                          | 98536                 | IPI00028051.1 | 1.405                       | 1                     |
| SPLICE ISOFORM LONG OF VACUOLAR PROTON TRANSLOCATING ATPASE 116 KDA SUBUNIT A ISOFORM 3. | 92998                 | IPI00299719.1 | 1.687                       | 1                     |
| SPLICE ISOFORM LONG OF VERY LOW-DENSITY LIPOPROTEIN RECEPTOR PRECURSOR.                  | 96098                 | IPI00024273.1 | 2.176                       | 1                     |
| SPLICE ISOFORM OS-9-2 OF PROTEIN OS-9 PRECURSOR.                                         | 69318                 | IPI00186581.6 | 3.268                       | 1                     |
| SPLICE ISOFORM PBX1A OF PRE-B-CELL LEUKEMIA TRANSCRIPTION FACTOR-1.                      | 46626                 | IPI00028415.1 | 5.814                       | 1                     |
| SPLICE ISOFORM RIN1 OF RAS AND RAB INTERACTOR 1.                                         | 84118                 | IPI00014454.1 | 2.043                       | 1                     |
| SPLICE ISOFORM SHORT OF CCAAT-BINDING TRANSCRIPTION FACTOR SUBUNIT B.                    | 33939                 | IPI00218470.1 | 5.975                       | 1                     |
| SPLICE ISOFORM SHORT OF EARLY GROWTH RESPONSE PROTEIN 2.                                 | 44970                 | IPI00220753.2 | 7.277                       | 1                     |
| SPLICE ISOFORM SHORT OF IDURONATE 2-SULFATASE PRECURSOR.                                 | 38310                 | IPI00006121.1 | 5.831                       | 1                     |
| SPLICE ISOFORM SHORT OF NGFI-A BINDING PROTEIN 1.                                        | 51091                 | IPI00220133.1 | 4.814                       | 1                     |

| Protein Description                                                                                   | Molecular Weight<br>(Da) | IPI Number    | Total Sequence<br>Coverage (%) | Total Unique<br>Peptides |
|-------------------------------------------------------------------------------------------------------|--------------------------|---------------|--------------------------------|--------------------------|
| SPLICE ISOFORM SHORT OF SULFOTRANSFERASE 1C1.                                                         | 34880                    | IPI00011290.1 | 4.054                          | 1                        |
| SPLICE ISOFORM SHORT OF UBIQUITIN CARBOXYL-TERMINAL HYDROLASE 25.                                     | 122218                   | IPI00219886.1 | 1.137                          | 1                        |
| SPLICE ISOFORM UGT2 OF UDP-GALACTOSE TRANSLOCATOR.                                                    | 41307                    | IPI00019254.1 | 5.303                          | 1                        |
| SPLICE ISOFORM USF2A OF UPSTREAM STIMULATORY FACTOR 2.                                                | 36955                    | IPI00020037.1 | 2.601                          | 1                        |
| SPLICE ISOFORM V0 OF VERSICAN CORE PROTEIN PRECURSOR.                                                 | 372820                   | IPI00009802.1 | 0.589                          | 1                        |
| SPLICE ISOFORM ZIS-1 OF ZINC FINGER PROTEIN 265.                                                      | 38223                    | IPI00029400.1 | 3.858                          | 1                        |
| SPLICING FACTOR 45.                                                                                   | 44962                    | IPI00176706.1 | 3.242                          | 1                        |
| SR-A1 PROTEIN.                                                                                        | 139266                   | IPI00303343.4 | 1.296                          | 1                        |
| SRF-DEPENDENT TRANSCRIPTION REGULATION ASSOCIATED PROTEIN.                                            | 48634                    | IPI00304493.5 | 3.263                          | 1                        |
| SRP25 NUCLEAR PROTEIN ISOFORM 2 .                                                                     | 36612                    | IPI00010276.2 | 4.692                          | 1                        |
| SRRP129 PROTEIN.                                                                                      | 128875                   | IPI00181359.3 | 1.22                           | 1                        |
| STAU2 PROTEIN.                                                                                        | 59002                    | IPI00164481.2 | 2.788                          | 1                        |
| STE20-LIKE KINASE (FRAGMENT).                                                                         | 105501                   | IPI00410485.1 | 1.336                          | 1                        |
| STOMATIN-LIKE PROTEIN 3.                                                                              | 32135                    | IPI00152125.1 | 2.405                          | 1                        |
| STROMAL CELL-DERIVED RECEPTOR-1 ALPHA.                                                                | 31291                    | IPI00011578.1 | 4.255                          | 1                        |
| STROMAL INTERACTION MOLECULE 2 .                                                                      | 93025                    | IPI00001727.2 | 1.08                           | 1                        |
| STRUCTURE PROTEIN NSP5B3B.                                                                            | 118396                   | IPI00291032.5 | 1.124                          | 1                        |
| SUCCINATE-COA LIGASE, ADP-FORMING, BETA SUBUNIT .                                                     | 50317                    | IPI00464979.2 | 8.855                          | 1                        |
| SUPPRESSOR OF TUMORIGENICITY 14.                                                                      | 94770                    | IPI00001922.1 | 1.754                          | 1                        |
| SWI/SNF-RELATED MATRIX-ASSOCIATED ACTIN-DEPENDENT REGULATOR OF<br>CHROMATIN SUBFAMILY A MEMBER 3.     | 113929                   | IPI00339381.3 | 2.18                           | 1                        |
| SWIVSNF RELATED, MATRIX ASSOCIATED, ACTIN DEPENDENT REGULATOR<br>OF CHROMATIN, SUBFAMILY A, MEMBER 1. | 122605                   | IPI00216046.1 | 1.044                          | 1                        |
| SYNAPTOGYRIN-2.                                                                                       | 24810                    | IPI00013946.1 | 3.571                          | 1                        |
| SYNAPTOPHYSIN.                                                                                        | 33845                    | IPI00027770.1 | 3.834                          | 1                        |
| SYNAPTOPODIN 2 .                                                                                      | 136315                   | IPI00173549.3 | 1.269                          | 1                        |
| SYNDECAN-4 PRECURSOR.                                                                                 | 21642                    | IPI00011564.1 | 6.061                          | 1                        |
| SYNTAXIN-8.                                                                                           | 26907                    | IPI00009225.1 | 7.627                          | 1                        |
| TAK1-BINDING PROTEIN 2.                                                                               | 76494                    | IPI00419504.2 | 3.896                          | 1                        |
| TARTRATE-RESISTANT ACID PHOSPHATASE TYPE 5 PRECURSOR.                                                 | 36599                    | IPI00419240.2 | 3.692                          | 1                        |
| TAX INTERACTION PROTEIN 1.                                                                            | 13735                    | IPI00005585.3 | 13.71                          | 1                        |
| TBC1 DOMAIN FAMILY MEMBER 5.                                                                          | 89004                    | IPI00022450.1 | 2.264                          | 1                        |
| T-CELL SURFACE GLYCOPROTEIN CD3 GAMMA CHAIN PRECURSOR.                                                | 20469                    | IPI00016020.1 | 8.791                          | 1                        |
| TESCALCIN.                                                                                            | 24750                    | IPI00149680.1 | 8.879                          | 1                        |

| Protein Description                                    | Molecular Weight<br>(Da) | IPI Number    | Total Sequence<br>Coverage (%) | Total Unique<br>Peptides |
|--------------------------------------------------------|--------------------------|---------------|--------------------------------|--------------------------|
| TESTIS-SPECIFIC BRDT PROTEIN.                          | 109540                   | IPI00410355.1 | 2.917                          | 1                        |
| TESTIS-SPECIFIC Y-ENCODED-LIKE PROTEIN 1.              | 49292                    | IPI00164215.4 | 5.936                          | 1                        |
| TETRATRICOPEPTIDE REPEAT DOMAIN 5.                     | 48956                    | IPI00166123.3 | 4.318                          | 1                        |
| TETRATRICOPEPTIDE REPEAT PROTEIN 1.                    | 33526                    | IPI00016912.1 | 4.452                          | 1                        |
| TETRATRICOPEPTIDE REPEAT PROTEIN 15.                   | 79361                    | IPI00152685.9 | 1.497                          | 1                        |
| TETRATRICOPEPTIDE REPEAT PROTEIN KIAA0103.             | 34834                    | IPI00014149.3 | 4.04                           | 1                        |
| TGF BETA RECEPTOR ASSOCIATED PROTEIN-1.                | 97177                    | IPI00550891.2 | 2.442                          | 1                        |
| TGF BETA-INDUCIBLE NUCLEAR PROTEIN 1.                  | 30065                    | IPI00007089.1 | 3.462                          | 1                        |
| THIOREDOXIN DOMAIN CONTAINING PROTEIN 9.               | 26534                    | IPI00022386.2 | 4.867                          | 1                        |
| THO COMPLEX SUBUNIT 1.                                 | 75666                    | IPI00305374.5 | 2.131                          | 1                        |
| THROMBOMODULIN PRECURSOR.                              | 60329                    | IPI00010737.1 | 3.478                          | 1                        |
| THROMBOSPONDIN-1 PRECURSOR.                            | 129413                   | IPI00296099.3 | 1.197                          | 1                        |
| THUMPD3 PROTEIN.                                       | 57003                    | IPI00306127.1 | 2.17                           | 1                        |
| THY-1 MEMBRANE GLYCOPROTEIN PRECURSOR.                 | 17935                    | IPI00022892.2 | 9.317                          | 1                        |
| THYMOSIN BETA-4, Y-CHROMOSOMAL.                        | 4881                     | IPI00219803.5 | 27.907                         | 1                        |
| THYMUS HIGH MOBILITY GROUP BOX PROTEIN TOX.            | 57515                    | IPI00006065.3 | 3.612                          | 1                        |
| THYROID RECEPTOR INTERACTING PROTEIN 12.               | 220434                   | IPI00032342.3 | 0.853                          | 1                        |
| THYROID RECEPTOR INTERACTING PROTEIN 6.                | 50288                    | IPI00301561.1 | 3.782                          | 1                        |
| T-LYMPHOMA INVASION AND METASTASIS INDUCING PROTEIN 1. | 177638                   | IPI00011400.1 | 0.943                          | 1                        |
| TMEM22 PROTEIN.                                        | 46451                    | IPI00160418.3 | 2.67                           | 1                        |
| TMEM45B PROTEIN.                                       | 31826                    | IPI00059683.3 | 5.091                          | 1                        |
| TNF RECEPTOR ASSOCIATED FACTOR 6.                      | 59573                    | IPI00184511.4 | 2.107                          | 1                        |
| TNFSF10 PROTEIN.                                       | 34857                    | IPI00000049.2 | 3                              | 1                        |
| TOLL-LIKE RECEPTOR 3 PRECURSOR.                        | 103829                   | IPI00019007.1 | 1.327                          | 1                        |
| TOM1-LIKE 1 PROTEIN.                                   | 53003                    | IPI00023186.4 | 3.361                          | 1                        |
| TORSIN A PRECURSOR.                                    | 37809                    | IPI00413293.3 | 3.313                          | 1                        |
| TRAFFICKING PROTEIN PARTICLE COMPLEX SUBUNIT 3.        | 20274                    | IPI00004324.1 | 4.444                          | 1                        |
| TRANSCRIPTION ELONGATION FACTOR A (SII)-LIKE 1.        | 18641                    | IPI00477802.1 | 7.547                          | 1                        |
| TRANSCRIPTION FACTOR MAFB.                             | 35792                    | IPI00023145.4 | 7.121                          | 1                        |
| TRANSCRIPTION FACTOR MAFG.                             | 17850                    | IPI00007311.1 | 6.79                           | 1                        |
| TRANSCRIPTION FACTOR RELB.                             | 61990                    | IPI00221034.8 | 4.663                          | 1                        |
| TRANSCRIPTION FACTOR SP1.                              | 80693                    | IPI00465152.2 | 1.911                          | 1                        |
| TRANSCRIPTION INITIATION FACTOR IIB.                   | 34833                    | IPI00022820.1 | 6.646                          | 1                        |
| TRANSCRIPTION INITIATION FACTOR IIE, BETA SUBUNIT.     | 33044                    | IPI00019981.1 | 6.529                          | 1                        |
| TRANSCRIPTIONAL COACTIVATOR.                           | 44101                    | IPI00180266.2 | 7                              | 1                        |

| Protein Description                                                       | Molecular Weight<br>(Da) | IPI Number    | Total Sequence<br>Coverage (%) | Total Unique<br>Peptides |
|---------------------------------------------------------------------------|--------------------------|---------------|--------------------------------|--------------------------|
| TRANSFORMING PROTEIN N-RAS.                                               | 21229                    | IPI00000005.1 | 6.349                          | 1                        |
| TRANSGELIN.                                                               | 22480                    | IPI00216138.5 | 4.5                            | 1                        |
| TRANSLATION INITIATION FACTOR EIF-2B ALPHA SUBUNIT.                       | 33712                    | IPI00221300.2 | 4.59                           | 1                        |
| TRANSLATION INITIATION FACTOR EIF-2B EPSILON SUBUNIT.                     | 80366                    | IPI00011898.2 | 1.942                          | 1                        |
| TRANSLOCATION ASSOCIATED MEMBRANE PROTEIN 1.                              | 42940                    | IPI00219111.6 | 3.485                          | 1                        |
| TRANSMEMBRANE 4 SUPERFAMILY MEMBER 2.                                     | 27574                    | IPI00016600.4 | 3.614                          | 1                        |
| TRANSMEMBRANE 4 SUPERFAMILY MEMBER 3.                                     | 26044                    | IPI00015872.1 | 10.127                         | 1                        |
| TRANSMEMBRANE CHANNEL-LIKE PROTEIN 4.                                     | 79188                    | IPI00465243.3 | 2.528                          | 1                        |
| TRANSMEMBRANE EMP24 DOMAIN CONTAINING PROTEIN 7 PRECURSOR.                | 25172                    | IPI00032825.2 | 4.464                          | 1                        |
| TRANSMEMBRANE PHOSPHOINOSITIDE 3-PHOSPHATASE AND TENSIN<br>HOMOLOG 2.     | 39050                    | IPI00103364.2 | 4.451                          | 1                        |
| TRANSMEMBRANE PROTEIN 5.                                                  | 51146                    | IPI00003392.1 | 5.192                          | 1                        |
| TRANSMEMBRANE PROTEIN UO-44D.                                             | 68153                    | IPI00249672.1 | 2.636                          | 1                        |
| TRANSMEMBRANE RECEPTOR PTK7-4.                                            | 112261                   | IPI00168812.1 | 1.874                          | 1                        |
| TRIM56 PROTEIN (FRAGMENT).                                                | 41593                    | IPI00150364.3 | 5.805                          | 1                        |
| TRIP7 VARIANT PROTEIN.                                                    | 8378                     | IPI00171277.3 | 20.779                         | 1                        |
| TRIPARTITE MOTIF PROTEIN 2.                                               | 81530                    | IPI00153011.1 | 1.747                          | 1                        |
| TRNA SPLICING 2' PHOSPHOTRANSFERASE 1.                                    | 27761                    | IPI00328580.1 | 5.929                          | 1                        |
| TRNA-(N1G37) METHYLTRANSFERASE .                                          | 58256                    | IPI00455268.1 | 1.965                          | 1                        |
| TROPOMODULIN-2.                                                           | 39595                    | IPI00005089.1 | 5.698                          | 1                        |
| TRUB PSEUDOURIDINE SYNTHASE-LIKE PROTEIN 1.                               | 37253                    | IPI00103341.1 | 3.152                          | 1                        |
| TSC22 DOMAIN FAMILY PROTEIN 4.                                            | 41026                    | IPI00000171.1 | 4.557                          | 1                        |
| TUBULIN-SPECIFIC CHAPERONE COFACTOR E-LIKE PROTEIN.                       | 48205                    | IPI00166956.4 | 5.896                          | 1                        |
| TUDOR DOMAIN CONTAINING PROTEIN 3.                                        | 73185                    | IPI00006571.1 | 1.997                          | 1                        |
| TUMOR AMPLIFIED AND OVEREXPRESSED SEQUENCE 2.                             | 114078                   | IPI00395839.4 | 3.347                          | 1                        |
| TUMOR DIFFERENTIALLY EXPRESSED PROTEIN 2.                                 | 50495                    | IPI00413817.3 | 2.87                           | 1                        |
| TUMOR NECROSIS FACTOR LIGAND SUPERFAMILY MEMBER 13B.                      | 31223                    | IPI00031802.1 | 9.474                          | 1                        |
| TUMOR NECROSIS FACTOR RECEPTOR TYPE 1 ASSOCIATED DEATH DOMAIN<br>PROTEIN. | 34247                    | IPI00018744.1 | 5.769                          | 1                        |
| TUMOR PROTEIN D53.                                                        | 22449                    | IPI00383670.3 | 5.392                          | 1                        |
| TUMOR SUPPRESSING STF CDNA 1.                                             | 43603                    | IPI00019550.1 | 4.393                          | 1                        |
| TUMOR SUPPRESSOR CANDIDATE 2 .                                            | 12074                    | IPI00027248.2 | 10.909                         | 1                        |
| TYROSINE-PROTEIN KINASE CSK.                                              | 50704                    | IPI00013212.1 | 2.889                          | 1                        |
| TYROSINE-PROTEIN KINASE FRK.                                              | 58254                    | IPI00000885.1 | 2.178                          | 1                        |
| TYROSINE-PROTEIN KINASE HCK.                                              | 59469                    | IPI00029769.5 | 1.905                          | 1                        |

| Protein Description                                                    | Molecular Weight<br>(Da) | IPI Number    | Total Sequence<br>Coverage (%) | Total Unique<br>Peptides |
|------------------------------------------------------------------------|--------------------------|---------------|--------------------------------|--------------------------|
| U3 SMALL NUCLEOLAR RIBONUCLEOPROTEIN PROTEIN IMP3 HOMOLOG.             | 21850                    | IPI00019488.1 | 8.152                          | 1                        |
| U6 SNRNA-ASSOCIATED SM-LIKE PROTEIN LSM1.                              | 15179                    | IPI00004436.1 | 12.03                          | 1                        |
| U6 SNRNA-ASSOCIATED SM-LIKE PROTEIN LSM2.                              | 10835                    | IPI00032460.3 | 20                             | 1                        |
| UBE3C PROTEIN.                                                         | 74796                    | IPI00472810.3 | 1.849                          | 1                        |
| UBINUCLEIN.                                                            | 121541                   | IPI00099834.3 | 0.882                          | 1                        |
| UBIQUINOL-CYTOCHROME C REDUCTASE COMPLEX 6.4 KDA PROTEIN.              | 6570                     | IPI00024757.1 | 21.429                         | 1                        |
| UBIQUITIN CARBOXYL-TERMINAL HYDROLASE 16.                              | 93570                    | IPI00001780.1 | 2.916                          | 1                        |
| UBIQUITIN CARBOXYL-TERMINAL HYDROLASE 30.                              | 58503                    | IPI00455146.3 | 3.675                          | 1                        |
| UBIQUITIN CARBOXYL-TERMINAL HYDROLASE 32.                              | 181656                   | IPI00185661.5 | 0.81                           | 1                        |
| UBIQUITIN CARBOXYL-TERMINAL HYDROLASE 8.                               | 127523                   | IPI00030915.1 | 1.521                          | 1                        |
| UBIQUITIN CROSS-REACTIVE PROTEIN PRECURSOR.                            | 17756                    | IPI00375631.5 | 5.488                          | 1                        |
| UBIQUITIN DOMAIN CONTAINING PROTEIN.                                   | 45137                    | IPI00305922.4 | 3.095                          | 1                        |
| UBIQUITIN-ACTIVATING ENZYME E1 HOMOLOG.                                | 111720                   | IPI00013183.5 | 2.275                          | 1                        |
| UBIQUITIN-CONJUGATING ENZYME E2 G2.                                    | 18566                    | IPI00010142.1 | 14.545                         | 1                        |
| UBIQUITIN-CONJUGATING ENZYME E2 H.                                     | 20655                    | IPI00020965.1 | 6.557                          | 1                        |
| UBIQUITIN-CONJUGATING ENZYME E2Q.                                      | 46127                    | IPI00333410.1 | 2.607                          | 1                        |
| UBIQUITIN-CONJUGATING ENZYME.                                          | 17769                    | IPI00329563.8 | 6.536                          | 1                        |
| UNC-13 HOMOLOG B.                                                      | 184347                   | IPI00298258.4 | 0.617                          | 1                        |
| UNCHARACTERIZED HEMATOPOIETIC STEM/PROGENITOR CELLS PROTEIN<br>MDS028. | 21788                    | IPI00160898.1 | 10.553                         | 1                        |
| UPF0238 PROTEIN C20ORF139.                                             | 14259                    | IPI00168554.1 | 17.518                         | 1                        |
| UPF0287 PROTEIN DC13.                                                  | 9460                     | IPI00024619.3 | 11.392                         | 1                        |
| UPREGULATED DURING SKELETAL MUSCLE GROWTH 5.                           | 6458                     | IPI00063903.3 | 27.586                         | 1                        |
| URIDINE DIPHOSPHATE GLUCOSE PYROPHOSPHATASE.                           | 24118                    | IPI00412878.1 | 15.766                         | 1                        |
| UTP14, U3 SMALL NUCLEOLAR RIBONUCLEOPROTEIN, HOMOLOG A.                | 87978                    | IPI00107113.3 | 1.686                          | 1                        |
| UV EXCISION REPAIR PROTEIN RAD23 HOMOLOG A.                            | 39609                    | IPI00008219.1 | 8.264                          | 1                        |
| VACUOLAR PROTEIN SORTING 54, ISOFORM 2.                                | 109362                   | IPI00163718.4 | 2.591                          | 1                        |
| VASORIN.                                                               | 71713                    | IPI00395488.2 | 2.377                          | 1                        |
| VESICLE TRANSPORT THROUGH INTERACTION WITH T-SNARES HOMOLOG<br>1A.     | 23435                    | IPI00059472.1 | 5.911                          | 1                        |
| VMP1 PROTEIN.                                                          | 46238                    | IPI00062469.1 | 7.389                          | 1                        |
| WBSCR16 PROTEIN.                                                       | 48662                    | IPI00170876.1 | 2.863                          | 1                        |
| WD REPEAT AND FYVE DOMAIN CONTAINING PROTEIN 1.                        | 46324                    | IPI00024283.2 | 3.171                          | 1                        |
| WD REPEAT DOMAIN 47.                                                   | 102036                   | IPI00217629.2 | 1.522                          | 1                        |
| WD-REPEAT CONTAINING PROTEIN CIAO 1.                                   | 37840                    | IPI00008791.1 | 2.065                          | 1                        |



| Protein Description                                      | Molecular Weight<br>(Da) | IPI Number    | Total Sequence<br>Coverage (%) | Total Unique<br>Peptides |
|----------------------------------------------------------|--------------------------|---------------|--------------------------------|--------------------------|
| WD-REPEAT PROTEIN 26.                                    | 58604                    | IPI00414197.2 | 2.724                          | 1                        |
| WD-REPEAT PROTEIN 36.                                    | 105322                   | IPI00169325.1 | 3.049                          | 1                        |
| WD-REPEAT PROTEIN 43.                                    | 79119                    | IPI00055954.2 | 1.528                          | 1                        |
| WD-REPEAT PROTEIN 6.                                     | 121725                   | IPI00013953.1 | 1.07                           | 1                        |
| WNT-4 PROTEIN PRECURSOR.                                 | 39052                    | IPI00011028.2 | 2.849                          | 1                        |
| WUGSC:H_DJ1139I01.1 PROTEIN.                             | 45567                    | IPI00002036.3 | 2.158                          | 1                        |
| XANTHINE DEHYDROGENASE/OXIDASE.                          | 146293                   | IPI00244391.2 | 1.652                          | 1                        |
| X-RAY RADIATION RESISTANCE ASSOCIATED 1.                 | 14836                    | IPI00385047.1 | 13.178                         | 1                        |
| XRP2 PROTEIN.                                            | 39641                    | IPI00026627.2 | 3.143                          | 1                        |
| YEATS DOMAIN-CONTAINING PROTEIN 4.                       | 26499                    | IPI00008536.3 | 4.846                          | 1                        |
| YTH DOMAIN CONTAINING 2 .                                | 160261                   | IPI00010200.2 | 1.259                          | 1                        |
| ZFYVE19 PROTEIN.                                         | 36387                    | IPI00102875.3 | 5.183                          | 1                        |
| ZINC BINDING ALCOHOL DEHYDROGENASE, DOMAIN CONTAINING 2. | 40140                    | IPI00166738.1 | 4.244                          | 1                        |
| ZINC FINGER CCCH TYPE DOMAIN CONTAINING PROTEIN 6.       | 131671                   | IPI00410656.1 | 2.019                          | 1                        |
| ZINC FINGER HIT DOMAIN CONTAINING PROTEIN 2.             | 42884                    | IPI00003318.1 | 5.211                          | 1                        |
| ZINC FINGER MATRIN TYPE 2.                               | 23612                    | IPI00069734.2 | 5.528                          | 1                        |
| ZINC FINGER PROTEIN 10.                                  | 66455                    | IPI00009267.2 | 1.745                          | 1                        |
| ZINC FINGER PROTEIN 198.                                 | 154911                   | IPI00294603.4 | 1.525                          | 1                        |
| ZINC FINGER PROTEIN 219.                                 | 76877                    | IPI00002612.2 | 3.878                          | 1                        |
| ZINC FINGER PROTEIN 24.                                  | 42128                    | IPI00306446.1 | 3.533                          | 1                        |
| ZINC FINGER PROTEIN 281.                                 | 96915                    | IPI00032563.3 | 3.799                          | 1                        |
| ZINC FINGER PROTEIN 294.                                 | 205177                   | IPI00015593.3 | 0.773                          | 1                        |
| ZINC FINGER PROTEIN 358.                                 | 59287                    | IPI00478037.1 | 2.113                          | 1                        |
| ZINC FINGER PROTEIN 483.                                 | 85097                    | IPI00235842.2 | 1.747                          | 1                        |
| ZINC FINGER PROTEIN 516.                                 | 124289                   | IPI00022470.1 | 1.032                          | 1                        |
| ZINC FINGER PROTEIN 592.                                 | 137555                   | IPI00022460.1 | 2.605                          | 1                        |
| ZINC FINGER, MATRIN TYPE 1.                              | 74755                    | IPI00306523.3 | 1.724                          | 1                        |
| ZINC TRANSPORTER 1.                                      | 55328                    | IPI00002483.4 | 5.128                          | 1                        |
| ZINC TRANSPORTER 8.                                      | 53929                    | IPI00000012.4 | 4.435                          | 1                        |
| ZINC-FINGER PROTEIN.                                     | 110538                   | IPI00217355.1 | 2.781                          | 1                        |
| ZNF262 PROTEIN.                                          | 136330                   | IPI00179453.3 | 0.98                           | 1                        |
