# Supplementary material
Source: PubMed Central journal article supplement (PMC2975945)
Supplement: NIHMS240452-supplement-Supplemental_2.pdf [file NIHMS240452-supplement-Supplemental_2.pdf]

| Peptide Sequence                             | Peptide mass (m/z) | Charge State | Xcorr  | DelCn2 |
|----------------------------------------------|--------------------|--------------|--------|--------|
| AAAAAAAAAAAAAAAAAGAGAGAK                     | 1597.8             | 2            | 4.4626 | 0.1607 |
| AAAAAAAAAPAAAATAATTAATTAATAAQ                | 2343.5             | 3            | 6.4211 | 0.6104 |
| AAAAAAAAAVPSAGPAGPAPTSAAGR                   | 2033.2             | 3            | 3.9727 | 0.2052 |
| AAAAAALQAK                                   | 957.1              | 2            | 4.5182 | 0.1574 |
| AAAAASAGSSASSGNQPPQELGLGELLEFSR              | 3175.4             | 3            | 4.2192 | 0.361  |
| AAAAMAPIKVGDAIPAVEVFEGEPGNKVNLAELFK          | 3569.1             | 3            | 4.5655 | 0.2735 |
| AAAARLVGAAASRGPTAAR                          | 1739.0             | 2            | 2.4034 | 0.161  |
| AAAASAAEAGIATTGTEDSDDALLK                    | 2321.4             | 2            | 4.9462 | 0.4043 |
| AAAAVVAAAAAR                                 | 942.1              | 2            | 3.2658 | 0.2436 |
| AAADFATHGK                                   | 989.1              | 2            | 2.6591 | 0.2291 |
| AAADLMAYCEAHAKEDPLLTPVASENPFR                | 3229.6             | 3            | 3.9506 | 0.3231 |
| AAAEDVNVTFEDQKQK                             | 1665.7             | 2            | 3.4392 | 0.3163 |
| AAEEGHIIIPR                                  | 1164.3             | 2            | 2.6917 | 0.2919 |
| AAAEVNQDYGLDPK                               | 1491.6             | 2            | 4.5187 | 0.3826 |
| AAAFEEQENETVVVK                              | 1664.8             | 2            | 2.7826 | 0.2462 |
| AAAFEQLQK                                    | 1006.1             | 2            | 2.708  | 0.2175 |
| AAAFVTSPPLSPDPTTDFLNSLLSCGDLQVTGSAHCTFNATAQK | 4523.0             | 3            | 4.1208 | 0.3308 |
| AAAGLGGGDSGDGTAR                             | 1333.3             | 2            | 4.0286 | 0.4745 |
| AAAGLLPGGK                                   | 855.0              | 2            | 2.6562 | 0.1021 |
| AAAHIHSSPGR                                  | 1104.2             | 2            | 3.1979 | 0.3498 |
| AAALAHLDR                                    | 938.1              | 2            | 2.9462 | 0.3167 |
| AAALEAMKDYTK                                 | 1312.5             | 2            | 3.4032 | 0.3004 |
| AAALEFLNRFEEAKR                              | 1766.0             | 3            | 3.7671 | 0.3074 |
| AAANEQLTR                                    | 974.1              | 2            | 3.0768 | 0.2306 |
| AAAPQAWAGPMEEPPQAQAPPR                       | 2272.5             | 2            | 3.4175 | 0.2612 |
| AAAQLLQSQAQQSGAQQTK                          | 1958.1             | 3            | 4.0766 | 0.1488 |
| AAASTDYK                                     | 1146.2             | 2            | 2.4162 | 0.2259 |
| AAATAEEDPK                                   | 1100.2             | 2            | 3.0728 | 0.2412 |
| AAATKKPAPEK                                  | 1112.3             | 2            | 2.7523 | 0.176  |
| AAATPESQEPQAK                                | 1328.4             | 2            | 3.2025 | 0.1008 |
| AAATQPDADTPDEPWAFPAR                         | 2256.4             | 3            | 3.6119 | 0.1413 |
| AAATQPDADTPDEPWAFPAAREFLR                    | 2802.1             | 3            | 4.5161 | 0.2604 |
| AAAVLAAESMVVTLAK                             | 1545.9             | 2            | 4.1261 | 0.381  |
| AAAVLPVLDLAQR                                | 1337.6             | 2            | 3.5689 | 0.3874 |
| AAAVPVEFQEHHLSEVQNMASEEKLEQVLSSMK            | 3698.1             | 3            | 5.0332 | 0.36   |
| AAAVPVEFQEHHLSEVQNMASEEKLEQVLSSMKENK         | 4069.5             | 3            | 6.2007 | 0.4203 |

| Peptide Sequence                         | Peptide mass (m/z) | Charge State | Xcorr  | DelCn2 |
|------------------------------------------|--------------------|--------------|--------|--------|
| AAVSEAEADFYEQNSR                         | 1858.9             | 2            | 2.9136 | 0.2662 |
| AAAYSAQVQPVDGATR                         | 1605.7             | 2            | 4.1852 | 0.3411 |
| AADALEEQQR                               | 1131.2             | 2            | 2.9883 | 0.1632 |
| AADAVEDLRWFR                             | 1449.6             | 2            | 2.4542 | 0.1516 |
| AADDTWEPFASGK                            | 1395.5             | 2            | 4.7341 | 0.4758 |
| AADEVAEGK                                | 889.9              | 2            | 2.8842 | 0.3146 |
| AADEVAEGKLNDFPLVWQTGSGTQTNMNVNEVISNR     | 4143.5             | 3            | 7.0249 | 0.4894 |
| AADEVLAEAKKPR                            | 1398.6             | 2            | 2.7889 | 0.1917 |
| AADFQLHTHVNDGTEFGGSYQK                   | 2536.7             | 3            | 5.0949 | 0.4309 |
| AADGNYYNAR                               | 1115.1             | 2            | 2.6809 | 0.2129 |
| AADIDQEVKER                              | 1274.4             | 2            | 3.0473 | 0.2503 |
| AADISLDNLVEGKR                           | 1501.7             | 2            | 3.6619 | 0.268  |
| AADKGVYIIGSSGFDSIPADLGVYTR               | 2787.1             | 3            | 4.9586 | 0.2437 |
| AADKLIQNLDANHDGR                         | 1751.9             | 3            | 4.0237 | 0.332  |
| AADLNGDLTATR                             | 1218.3             | 2            | 3.6695 | 0.2994 |
| AADLQLEMTQKPHKKPGPEPLVFGK                | 2818.3             | 3            | 6.5341 | 0.4212 |
| AADMGNPVGQSGLGMAVLYGR                    | 2129.4             | 2            | 5.8488 | 0.6132 |
| AADPGPGAELDPAAPPPAR                      | 1770.9             | 2            | 3.3488 | 0.4416 |
| AADPLVGVFLWGVVAHSINELSQVPPVMLLPDDFK      | 3774.4             | 3            | 3.8761 | 0.1642 |
| AADPPAENSSAPEAEQGGAE                     | 1898.9             | 2            | 4.4129 | 0.3779 |
| AADPTAPGSDSAVTLRGTSVER                   | 2159.3             | 2            | 2.6602 | 0.1894 |
| AADPVSPLLHELTFQAMAYDLLDIEQDTYRYETTGLSEAR | 4546.0             | 3            | 3.2786 | 0.1184 |
| AADRLPNLSSPSAEGPPGPPSGPAPR               | 2496.7             | 3            | 5.288  | 0.3626 |
| AADVLVYLADDTVVPLAVENLPSLSAHELHR          | 3329.7             | 3            | 4.595  | 0.3282 |
| AAEAAINILK                               | 1014.2             | 2            | 3.347  | 0.2321 |
| AAEAPPTQEAQGETEPTAQAPDALEQAADTSR         | 3382.5             | 3            | 5.0162 | 0.4124 |
| AAEAPPTQEAQGETEPTAQAPDALEQAADTSRR        | 3538.6             | 3            | 4.6774 | 0.4522 |
| AAEAGGAEQYGFLLTPTK                       | 1942.1             | 2            | 3.3333 | 0.2946 |
| AAEAHVDAHYEQNEQPTGTCAACITGDNR            | 3237.4             | 3            | 6.4609 | 0.2388 |
| AAEALHGEADSSGVLAAVDATVNK                 | 2297.5             | 3            | 5.0434 | 0.3649 |
| AAEAVAAAVGTGATTAAVMAAAGIAAIGPAK          | 2626.0             | 3            | 5.0909 | 0.475  |
| AAEDDEDDVDTKKQK                          | 1822.8             | 2            | 5.1059 | 0.2429 |
| AAEDDEDDVDTKKQKTDEDD                     | 2398.3             | 3            | 4.9538 | 0.2649 |
| AAEEAFVNDIDESSPGTEWER                    | 2353.4             | 2            | 5.4415 | 0.4331 |
| AAEEEDEADPKR                             | 1360.4             | 2            | 3.7358 | 0.3007 |
| AAEPPSKVEEK                              | 1217.3             | 2            | 2.8178 | 0.1592 |

| Peptide Sequence                           | Peptide mass (m/z) | Charge State | Xcorr  | DelCn2 |
|--------------------------------------------|--------------------|--------------|--------|--------|
| AAEEVEAK                                   | 846.9              | 2            | 2.4123 | 0.1444 |
| AAEFGPTSEQTGTAAGK                          | 1752.8             | 2            | 3.9223 | 0.3105 |
| AAEKEAALVQEEEEKAEQR                        | 2158.3             | 3            | 4.6505 | 0.3168 |
| AAEKLYLADPMKAR                             | 1577.9             | 2            | 3.7139 | 0.2523 |
| AAEKRPAEDYVPR                              | 1502.7             | 3            | 3.523  | 0.382  |
| AAEKRPAEDYVPRK                             | 1630.8             | 3            | 3.3862 | 0.2357 |
| AAEKVSEAR                                  | 961.1              | 1            | 2.354  | 0.1516 |
| AAELEMELNEHSLVIDTLKEVDETR                  | 2886.2             | 3            | 3.6077 | 0.2141 |
| AAELEMELNEHSLVIDTLKEVDETRK                 | 3014.4             | 3            | 5.4961 | 0.368  |
| AAELFHQLSQALEVLTDAAAR                      | 2255.5             | 3            | 3.6655 | 0.2594 |
| AAELIANSLATAGDGLIELR                       | 1999.3             | 2            | 6.0425 | 0.4578 |
| AAEMMASLLKDLAEIGIAVGNNDVKQPEGTGMIDEEFTVAR  | 4336.9             | 3            | 5.6732 | 0.4809 |
| AAESETPGKSPEK                              | 1331.4             | 2            | 2.7274 | 0.1225 |
| AAESETPGKSPEKKPK                           | 1684.9             | 2            | 3.8267 | 0.2452 |
| AAESLADPTEYENLFPGLK                        | 2066.3             | 2            | 5.0896 | 0.379  |
| AAETDPGMVHLALGSDLTTLGLNLNSPENLYPK          | 3453.9             | 3            | 5.3907 | 0.4003 |
| AAETHFGFETVSEEEKGGK                        | 2054.2             | 3            | 4.0192 | 0.3535 |
| AAFALGGLGSGFASNREELSALVAPAFHAHTSQVLVVK     | 3704.1             | 3            | 3.9016 | 0.1955 |
| AAFDDAIAELDTLSEESYK                        | 2089.2             | 2            | 5.9763 | 0.5203 |
| AAFDDAIAELDTLSEESYKDSTLIMQLLR              | 3260.6             | 3            | 6.1606 | 0.5514 |
| AAFERESDVPLKTEEFVTK                        | 2326.5             | 2            | 5.1461 | 0.4399 |
| AAFGEVDAVDTGISR                            | 1637.7             | 2            | 3.252  | 0.2978 |
| AAFGLSEAGFNTACVTK                          | 1687.9             | 2            | 3.4878 | 0.227  |
| AAFQQGSGPIMLDEVQCTGTEASLADCK               | 2801.1             | 3            | 3.9809 | 0.1486 |
| AAFIKAEKENPGLTQDIIMK                       | 2218.6             | 3            | 4.0982 | 0.3695 |
| AAFKELQSTFK                                | 1270.5             | 2            | 2.4205 | 0.2351 |
| AAFNSGK                                    | 694.8              | 1            | 1.822  | 0.185  |
| AAFNSGKVDIVAINDPFIDLNYMVYMFQYDSTHGK        | 3986.5             | 3            | 6.1484 | 0.4791 |
| AAFNSGKVDIVAINDPFIDLNYMVYMFQYDSTHGKFBHGTVK | 4656.3             | 3            | 5.8955 | 0.4419 |
| AAFQLGSPWR                                 | 1133.3             | 2            | 3.5662 | 0.2741 |
| AAFQPEANPSHLTLNLTALVESEDL                  | 2568.8             | 2            | 4.0096 | 0.2448 |
| AAFSKDESKEPIVEVR                           | 1806.0             | 2            | 4.4406 | 0.3905 |
| AAFTAFEEAQLPR                              | 1451.6             | 2            | 2.8828 | 0.1713 |
| AAGEVLEPANLLAEKDEDLLFE                     | 2516.7             | 2            | 3.1643 | 0.2165 |
| AAGGDGDDSLYPIAVLIDELR                      | 2161.4             | 3            | 5.116  | 0.3488 |
| AAGGGAGSSEDDAQRS                           | 1436.4             | 2            | 3.6851 | 0.3492 |

| Peptide Sequence                            | Peptide mass (m/z) | Charge State | Xcorr  | DelCn2 |
|---------------------------------------------|--------------------|--------------|--------|--------|
| AAGGGSYKGHVDILAPTVQELAALEK                  | 2596.9             | 3            | 5.3815 | 0.2912 |
| AAGGGSYKGHVDILAPTVQELAALEKEAQTSLHLGYLPNQLFR | 4713.3             | 3            | 6.5398 | 0.5327 |
| AAGHLLKPR                                   | 963.2              | 2            | 3.2177 | 0.2038 |
| AAGHPGDPEQQR                                | 1350.4             | 2            | 2.8924 | 0.2304 |
| AAGIDEQENWHEGKENIR                          | 2097.2             | 2            | 4.6415 | 0.3691 |
| AAGKGPLATGGIKK                              | 1269.5             | 2            | 3.477  | 0.3323 |
| AAGKLKAEGSEIR                               | 1330.5             | 2            | 3.0599 | 0.2065 |
| AAGPSLSHTSGGTQSK                            | 1486.6             | 2            | 4.1125 | 0.4649 |
| AAGSGELGVTMK                                | 1121.3             | 2            | 3.291  | 0.4317 |
| AAGSGELGVTMKGPK                             | 1403.6             | 2            | 3.4845 | 0.3842 |
| AAGTDGSDFQHR                                | 1262.3             | 2            | 2.5558 | 0.139  |
| AAGVNVEPFWPGLFAK                            | 1704.0             | 2            | 4.3197 | 0.4713 |
| AAGVVLEMIR                                  | 1059.3             | 2            | 3.3014 | 0.2573 |
| AAHFGNPEAAHPAPLYSPTRPVSR                    | 2544.8             | 3            | 4.1413 | 0.3716 |
| AAHGVLLQALDEMR                              | 1524.8             | 2            | 4.4919 | 0.3647 |
| AAHIFNEALVCHQIR                             | 1723.0             | 2            | 4.4623 | 0.3383 |
| AAHSEGNTTAGLDMR                             | 1531.6             | 2            | 4.1549 | 0.5143 |
| AAHVAPAAPDAGAPTAPAASATR                     | 2043.2             | 2            | 4.7651 | 0.4646 |
| AAHVLMPHVESTVEHTHVDINEMESPLATR              | 3253.6             | 3            | 4.8683 | 0.4363 |
| AAIAQLNGKEVK                                | 1242.5             | 2            | 3.0342 | 0.1978 |
| AAIDWFDGKEFHGNIK                            | 1962.2             | 3            | 4.8125 | 0.4488 |
| AAIDWFDGKEFSGNPIK                           | 1896.1             | 3            | 4.5176 | 0.3835 |
| AAIISAEGDSK                                 | 1062.2             | 1            | 2.8662 | 0.3828 |
| AAIISAEGDSKAAELIANSLATAGDGLIELR             | 3042.4             | 3            | 6.2618 | 0.4397 |
| AAILETAPK                                   | 914.1              | 2            | 2.7485 | 0.1236 |
| AAILETAPKEVPMVVVPPVGAK                      | 2217.7             | 3            | 4.6042 | 0.3794 |
| AAILQTEVDALR                                | 1300.5             | 2            | 3.3219 | 0.3288 |
| AAIVHNVDSDDLISMGSDNIEVLK                    | 2556.8             | 2            | 5.7551 | 0.4875 |
| AAIYDKYKEFAIPEEEAEWVGLTLEEAIK               | 3486.9             | 3            | 3.5134 | 0.1824 |
| AAIYDKYKEFAIPEEEAEWVGLTLEEAIKQR             | 3771.2             | 3            | 3.8814 | 0.1275 |
| AAKADEEPTPADGR                              | 1428.5             | 2            | 3.269  | 0.1859 |
| AAKLEILQQQLQVANEAR                          | 2024.3             | 2            | 5.4595 | 0.3548 |
| AAKPLPFKDPNFVHSGHGGAVAGK                    | 2403.7             | 3            | 3.4715 | 0.2272 |
| AAKQPHVGDYR                                 | 1242.4             | 2            | 2.533  | 0.2799 |
| AAKVLEQLTGQTPVFSK                           | 1818.1             | 2            | 5.2664 | 0.4284 |
| AALAGGTTMIIDHVVPEPGTSLLAAFDQWR              | 3139.6             | 3            | 3.9033 | 0.1935 |

| Peptide Sequence                       | Peptide mass (m/z) | Charge State | Xcorr  | DelCn2 |
|----------------------------------------|--------------------|--------------|--------|--------|
| AALAHPPFFQDVTKPVPHLRL                  | 2258.7             | 3            | 3.8923 | 0.2158 |
| AALAHSEEVTAASQVAATK                    | 1784.9             | 2            | 5.7291 | 0.5776 |
| AALAPAKESPR                            | 1111.3             | 2            | 2.6646 | 0.2721 |
| AALDGTPGMIGYGMAK                       | 1553.8             | 2            | 4.3352 | 0.4196 |
| AALDIVHPVRVDAGGSFLSYELWPRALRKR         | 3394.9             | 3            | 3.4516 | 0.1135 |
| AALDKATVLLSMSK                         | 1448.8             | 2            | 4.1121 | 0.355  |
| AALEDTLAETEAR                          | 1390.5             | 2            | 4.7816 | 0.4341 |
| AALEYLEDIDLK                           | 1393.6             | 2            | 2.8707 | 0.2459 |
| AALEYLEDIDLKTLEKEPR                    | 2247.5             | 3            | 4.2629 | 0.3643 |
| AALGESGEQADGPK                         | 1330.4             | 2            | 2.9407 | 0.279  |
| AALHLYSNTLNFQISEVEPK                   | 2275.5             | 3            | 4.1951 | 0.1083 |
| AALHPPALAVLSHTPDGATQTIAWVGK            | 2724.1             | 3            | 4.2372 | 0.2856 |
| AALLDQALSNAK                           | 1243.4             | 2            | 3.0838 | 0.2627 |
| AALLHGETR                              | 968.1              | 2            | 2.6925 | 0.3023 |
| AALLNQHYQVNFK                          | 1546.8             | 2            | 4.0594 | 0.16   |
| AALLWALAAALER                          | 1369.6             | 2            | 3.1852 | 0.3263 |
| AALMESQGQQQEER                         | 1605.7             | 2            | 4.7375 | 0.2931 |
| AALNTVHEANGTEDERAVSK                   | 2113.2             | 3            | 3.2534 | 0.2151 |
| AALPSHVVTMLDNFPTNLHPMSQLSAAVTALNSESNAK | 4154.7             | 3            | 7.087  | 0.5765 |
| AALQELLSK                              | 973.1              | 2            | 3.2952 | 0.1964 |
| AALQELLSKGLIK                          | 1384.7             | 2            | 4.0148 | 0.211  |
| AALQELLSKGLIKLVSK                      | 1812.2             | 3            | 4.1485 | 0.3604 |
| AALQHAHAHSSGYFITQDSAFGNLILPVLPR        | 3333.7             | 3            | 3.4452 | 0.1932 |
| AALQLVVDPGDPR                          | 1351.5             | 2            | 2.5448 | 0.2482 |
| AALRDYETVVK                            | 1265.4             | 2            | 3.0392 | 0.1526 |
| AALSAGKVSPETVDSVIMGNVLQSSSDAIYLAR      | 3351.8             | 3            | 4.8302 | 0.2707 |
| AALSASEGEEVPQDKAPSHVPFLLIGGGTAAFAAAR   | 3537.9             | 3            | 5.6177 | 0.4828 |
| AALSEEELEKK                            | 1247.4             | 2            | 3.1104 | 0.1679 |
| AALSSQQQQQLALLLQQFQTLK                 | 2486.9             | 3            | 4.3333 | 0.3033 |
| AALTGLLHR                              | 952.1              | 2            | 3.105  | 0.3445 |
| AALTVHQAR                              | 967.1              | 2            | 2.7278 | 0.293  |
| AALVAQNYINYQQGTPHR                     | 2045.2             | 2            | 4.6681 | 0.43   |
| AALVDLEPGTMDSVR                        | 1574.8             | 2            | 4.0368 | 0.2911 |
| AAMAAAQSGTPGPVVELPVDVLYPYFMVQK         | 3298.9             | 3            | 4.4377 | 0.2869 |
| AAMALEK                                | 733.9              | 1            | 1.7569 | 0.1239 |
| AAMDNSEIAGEK                           | 1236.3             | 2            | 2.8013 | 0.1893 |

| Peptide Sequence                       | Peptide mass (m/z) | Charge State | Xcorr  | DelCn2 |
|----------------------------------------|--------------------|--------------|--------|--------|
| AAMDNSEIAGEKK                          | 1364.5             | 2            | 3.4219 | 0.2393 |
| AAMDNSEIAGEKKSQAQWRTVEGALKERR          | 3133.5             | 3            | 3.6049 | 0.1239 |
| AAMEALVVEVTKQPAIISQLDPVNER             | 2823.3             | 3            | 5.6825 | 0.4278 |
| AAMFPETLDEGMQIPSTQFDAAHPTNVQR          | 3204.5             | 3            | 4.7544 | 0.4336 |
| AAMQRGSLPANVPTPRGLLGDAPNDPR            | 2773.1             | 3            | 3.2943 | 0.1906 |
| AANDAGYFNDEMAPIEVK                     | 1956.1             | 2            | 5.5418 | 0.4588 |
| AANEVSSADVK                            | 1091.2             | 2            | 3.6605 | 0.2477 |
| AANEVSSADVKKQVK                        | 1446.6             | 2            | 3.6935 | 0.2683 |
| AANGVVLATEKK                           | 1201.4             | 2            | 2.9704 | 0.2321 |
| AANMLQQSGSK                            | 1135.3             | 2            | 3.2196 | 0.3538 |
| AANNGALPPDLSYIVR                       | 1671.9             | 2            | 3.1832 | 0.3056 |
| AANQLDKDHAK                            | 1211.3             | 2            | 2.5838 | 0.1779 |
| AANSLEAFIFETQDK                        | 1684.8             | 2            | 4.8969 | 0.4104 |
| AANVLLSEHGKVK                          | 1367.5             | 2            | 3.4448 | 0.2507 |
| AAPASSAGASDAR                          | 1132.2             | 2            | 3.5503 | 0.4199 |
| AAPAVQTK                               | 785.9              | 1            | 1.7551 | 0.2073 |
| AAPFNNWMESAMEDLQDMFIVHTIEEIEGLISAHDQFK | 4409.9             | 3            | 5.044  | 0.4423 |
| AAPFSLEYR                              | 1054.2             | 1            | 2.537  | 0.1533 |
| AAPGAEFAPNKR                           | 1229.4             | 2            | 2.5385 | 0.3785 |
| AAPLAGFGYGLPISR                        | 1490.7             | 2            | 4.945  | 0.5398 |
| AAPLIVEVFNKVLHSSNPVPLYAPNLSPPADSR      | 3515.0             | 3            | 3.307  | 0.1737 |
| AAPLQGMLPGLLAPLR                       | 1619.0             | 2            | 4.2206 | 0.3976 |
| AAPPPGQSQAQSQQQPVTAPAR                 | 2242.4             | 3            | 4.1478 | 0.2512 |
| AAPRPAPVAQPPAAAPPSAVGSSAAAPR           | 2534.9             | 3            | 5.5501 | 0.4757 |
| AAPSTAPAEATPPKPGAEAEAPPKHGVLK          | 2818.2             | 3            | 3.6028 | 0.2728 |
| AAPTAASDQPDSAATTEK                     | 1732.8             | 2            | 5.7203 | 0.5149 |
| AAPTASGKAEPLAVGKEDPVSK                 | 2124.4             | 3            | 3.4511 | 0.3443 |
| AAQASDLEK                              | 933.0              | 2            | 2.9636 | 0.2949 |
| AAQASDLEKIHLEK                         | 1668.8             | 3            | 3.4147 | 0.3746 |
| AAQASDLEKIHLEKSFRR                     | 2059.3             | 3            | 4.945  | 0.4405 |
| AAQEEYVK                               | 938.0              | 2            | 2.4841 | 0.2292 |
| AAQEEYVKR                              | 1094.2             | 2            | 3.1026 | 0.1871 |
| AAQELQEGQR                             | 1130.2             | 2            | 3.6059 | 0.2101 |
| AAQIFITELTLR                           | 1376.6             | 2            | 2.8579 | 0.1503 |
| AAQKADVLTGAGNPVGDKLNIVTVGPR            | 2764.1             | 3            | 6.8956 | 0.4647 |
| AAQLQHSEK                              | 1012.1             | 2            | 2.6632 | 0.2948 |

| Peptide Sequence                                  | Peptide mass (m/z) | Charge State | Xcorr  | DelCn2 |
|---------------------------------------------------|--------------------|--------------|--------|--------|
| AAQLVDKDKSTFLSTLEHHLR                             | 2369.6             | 3            | 7.0794 | 0.5263 |
| AAQMHSQYQR                                        | 1149.3             | 2            | 2.8545 | 0.2769 |
| AAQNISK                                           | 731.8              | 1            | 1.6001 | 0.1624 |
| AAQQQEEQEEKEEEDDEQTLHR                            | 2700.7             | 3            | 5.2651 | 0.2537 |
| AAQSTAMNR                                         | 950.1              | 2            | 3.005  | 0.2257 |
| AASAAGAAGSAGGSSGAAGAAGGGAGAGTRPGDGGTASAGAAGPGAATK | 3671.8             | 3            | 7.5985 | 0.5051 |
| AASAATAAPTATPAAQESGTIPK                           | 2084.3             | 3            | 4.5814 | 0.278  |
| AASADSTTEGTPADGFTVLSTK                            | 2128.2             | 2            | 5.9902 | 0.5258 |
| AASAGQEPLHNEELAGAGR                               | 1879.0             | 2            | 5.4733 | 0.3624 |
| AASAGVPYHGEVPVSLAR                                | 1782.0             | 2            | 3.2107 | 0.3141 |
| AASAHAIGTVK                                       | 1026.2             | 2            | 2.7997 | 0.3291 |
| AASDIAMTELPPTHPIR                                 | 1821.1             | 2            | 4.7114 | 0.4312 |
| AASGEAKPK                                         | 859.0              | 2            | 2.6009 | 0.2117 |
| AASGEAKPKVK                                       | 1086.3             | 2            | 2.7404 | 0.2044 |
| AASGFNAMEDAQTLR                                   | 1582.7             | 2            | 4.9455 | 0.4624 |
| AASGFNAMEDAQTLRK                                  | 1710.9             | 2            | 5.1237 | 0.4558 |
| AASGYPVKVPLEVQEADKALQQTAEELR                      | 3171.5             | 3            | 7.7458 | 0.4728 |
| AASIFGGAKPVDTAAR                                  | 1532.7             | 2            | 3.6244 | 0.3745 |
| AASNIIFSNGNLDPWAGGGIR                             | 2131.3             | 2            | 4.1139 | 0.2802 |
| AASQGYTVAR                                        | 1024.1             | 2            | 2.5546 | 0.2971 |
| AASQPGELKDWVGR                                    | 1661.8             | 2            | 4.4308 | 0.4932 |
| AASQPTSLAPEKLREE                                  | 1727.9             | 2            | 2.9742 | 0.2622 |
| AASQQEIEQSIETLNMLMLDLEPASAAAPLHK                  | 3451.9             | 3            | 3.446  | 0.2512 |
| AASSAAQGAFFQGN                                    | 1180.2             | 2            | 3.1456 | 0.3946 |
| AASSPGGSAPR                                       | 958.0              | 2            | 2.5539 | 0.1514 |
| AATALKDVVK                                        | 1016.2             | 1            | 3.4365 | 0.2166 |
| AATAPLLEAVDNLSAFASNPEFSSIPAQISPEGR                | 3472.8             | 3            | 4.1946 | 0.321  |
| AATFGLLDDVSLTHLTFGK                               | 2120.4             | 2            | 5.3533 | 0.4436 |
| AATFGLLDDVSLTHLTFGKEFTEAVEAK                      | 3125.5             | 3            | 4.0782 | 0.2556 |
| AATHGLMLGALQGDGPLPAELEELR                         | 2560.9             | 3            | 5.9384 | 0.401  |
| AATHGLMLGALQGDGPLPAELEELRNR                       | 2831.2             | 3            | 4.8217 | 0.3679 |
| AATLAQELEKFNR                                     | 1491.7             | 2            | 2.4614 | 0.1753 |
| AATSDLEHYDKTR                                     | 1507.6             | 2            | 4.2557 | 0.3568 |
| AATSEGVQVK                                        | 990.1              | 2            | 3.0441 | 0.2558 |
| AATSPALFNR                                        | 1048.2             | 2            | 2.6851 | 0.2052 |
| AATSVKDLAQR                                       | 1160.3             | 2            | 2.7289 | 0.1426 |

| Peptide Sequence                  | Peptide mass (m/z) | Charge State | Xcorr  | DelCn2 |
|-----------------------------------|--------------------|--------------|--------|--------|
| AAVAGEDGR                         | 845.9              | 2            | 2.4563 | 0.1347 |
| AAVAGEDGRMIAGQVLDINLAAEPK         | 2510.9             | 3            | 6.2204 | 0.2144 |
| AAVAGKKPVVGK                      | 1125.4             | 2            | 2.9772 | 0.1543 |
| AAVAGKKPVVGKK                     | 1253.6             | 2            | 3.3176 | 0.3092 |
| AAVAIQSQFR                        | 1091.2             | 2            | 3.6139 | 0.2719 |
| AAVATFLQSVQVPEFTPK                | 1934.2             | 2            | 5.2914 | 0.4484 |
| AAVAWEAGKPLSIEEIEVAPPK            | 2306.6             | 2            | 3.6028 | 0.3206 |
| AAVAWEAGKPLSIEEIEVAPPKAHEVR       | 2899.3             | 3            | 5.8336 | 0.4358 |
| AAVDAGFVPNDMQVGQTGK               | 1906.1             | 2            | 5.0358 | 0.4762 |
| AAVEALQSQUALHATSQQPLRK            | 2248.5             | 3            | 4.3657 | 0.3102 |
| AAVEDPRVLLLDL                     | 1424.7             | 2            | 3.8933 | 0.2644 |
| AAVENHVR                          | 896.0              | 2            | 2.5567 | 0.2003 |
| AAVENLPTFLVELSR                   | 1659.9             | 2            | 5.1725 | 0.3863 |
| AAVEWFDGKDFQGSK                   | 1685.8             | 2            | 4.0216 | 0.4255 |
| AAVFDLDGVLALPAVFGVLGR             | 2101.5             | 3            | 4.0911 | 0.3284 |
| AAVFHEK                           | 801.9              | 2            | 2.4727 | 0.1538 |
| AAVFHEKDYDSLAPGFFDR               | 2314.5             | 3            | 4.6265 | 0.4295 |
| AAVFHEKDYDSLAPGFFDRFIR            | 2731.0             | 3            | 3.2728 | 0.2224 |
| AAVGQESPGGLEAGNAK                 | 1556.7             | 2            | 3.1851 | 0.2919 |
| AAVGRPLDKHEGALETLLR               | 2047.3             | 2            | 3.9585 | 0.3358 |
| AAVGVKKQKPLVGKAAATKKPAPEKKPAEKK   | 3455.2             | 3            | 3.2004 | 0.117  |
| AAVHYDR                           | 831.9              | 2            | 2.4106 | 0.2749 |
| AAVKGYLGPEQLPDCLKGCDVVIPAGVPR     | 3066.6             | 3            | 5.9043 | 0.3896 |
| AAVLEYLTAEILELAGNAAR              | 2089.4             | 3            | 5.0919 | 0.3269 |
| AAVMVHQLSK                        | 1084.3             | 2            | 2.9044 | 0.3135 |
| AAVPDAVGK                         | 827.9              | 1            | 1.9278 | 0.1785 |
| AAVPIVNLKDELLFPSWEALFSGSEGPLKPGAR | 3511.0             | 3            | 4.4995 | 0.4081 |
| AAVPPGTVVPTEAAAPTEVTEGPGVAAPTK    | 2787.1             | 3            | 3.3711 | 0.3493 |
| AAVPSGASTGIYEALRLR                | 1806.0             | 2            | 5.3262 | 0.4268 |
| AAVQVLDDIEK                       | 1201.4             | 2            | 2.7839 | 0.1276 |
| AAVSHWQQQSYLDSGIHSGATTTAPSLSGK    | 3087.3             | 3            | 5.7504 | 0.4468 |
| AAVTALASLYGTK                     | 1266.5             | 2            | 2.89   | 0.3109 |
| AAVVESHK                          | 840.9              | 2            | 2.4151 | 0.145  |
| AAVVESHKLGGTGVNVGCVPK             | 2069.4             | 3            | 3.6502 | 0.1943 |
| AAVVHHFESFPAGSTLIFYK              | 2222.5             | 3            | 4.6706 | 0.3801 |
| AAVVTSPPTTAPHKER                  | 1760.0             | 2            | 2.9232 | 0.3326 |



| Peptide Sequence                   | Peptide mass (m/z) | Charge State | Xcorr  | DelCn2 |
|------------------------------------|--------------------|--------------|--------|--------|
| AAVYHHFISDGVR                      | 1472.6             | 2            | 3.6519 | 0.3831 |
| AAWEAGKFGNEVIPVTVTK                | 2117.4             | 3            | 4.6123 | 0.2183 |
| AAWIPHVENR                         | 1193.3             | 1            | 2.9404 | 0.2592 |
| AAYEAEELGDAR                       | 1166.2             | 2            | 4.0189 | 0.3832 |
| AAYEAEELGDARK                      | 1294.4             | 2            | 3.4529 | 0.2563 |
| AAYEAEELGDARKTLDSVAKER             | 2294.5             | 3            | 3.7957 | 0.3744 |
| AAYFGIYDTAK                        | 1220.4             | 2            | 2.8262 | 0.3506 |
| AAKEYISNK                          | 1187.3             | 2            | 2.6984 | 0.2825 |
| AYLQETGKPLDETLKK                   | 1906.2             | 2            | 4.6151 | 0.4507 |
| AAYPDLENPPLLVTSPQAK                | 2153.4             | 3            | 5.5948 | 0.3751 |
| AAYSFYNVHTQTPLLDLMSDALVLAK         | 2883.3             | 3            | 5.4851 | 0.4152 |
| ACALSIEESCRPGDKVPIKPNAGEESVMNLDK   | 3500.0             | 3            | 5.2215 | 0.2519 |
| ACALSIEESCRPGDKVPIKPNAGEESVMNLDKLR | 3769.3             | 3            | 4.8567 | 0.2382 |
| ACANPAAGSVILLENLR                  | 1713.0             | 2            | 4.4497 | 0.4463 |
| ACEFAGFQCQIQFGPHNEQK               | 2283.5             | 3            | 3.988  | 0.1258 |
| ACHILECPEGLAQDVISTIGQAFELR         | 2815.2             | 3            | 3.9739 | 0.2937 |
| ACKTEADGRVVEGNHMYR                 | 2136.4             | 2            | 2.4237 | 0.3552 |
| ADAAPDEKVLDSGFREIENK               | 2205.4             | 2            | 5.2951 | 0.3725 |
| ADAASSLTVDVTPPTAK                  | 1644.8             | 2            | 3.9342 | 0.3968 |
| ADAEAAAATR                         | 1063.1             | 2            | 3.6499 | 0.2487 |
| ADAEGESDLENSR                      | 1393.4             | 2            | 3.4408 | 0.3726 |
| ADAEKAQEQQQMAELHSK                 | 2171.3             | 3            | 6.6752 | 0.3831 |
| ADAETLRK                           | 904.0              | 2            | 2.5337 | 0.1213 |
| ADAGKEGNNPAENGDAK                  | 1658.7             | 2            | 3.813  | 0.3596 |
| ADAGKEGNNPAENGDAKTDQAQK            | 2330.4             | 3            | 4.907  | 0.3113 |
| ADAGKEGNNPAENGDAKTDQAQKAEGAGDA     | 2901.9             | 3            | 4.7737 | 0.399  |
| ADAGKEGNNPAENGDAKTDQAQKAEGAGDAK    | 3030.1             | 3            | 4.8995 | 0.3563 |
| ADAGPSGQGDSVSIK                    | 1446.5             | 2            | 3.3602 | 0.2673 |
| ADALQAGASQFETSAK                   | 1666.8             | 2            | 4.8902 | 0.4263 |
| ADASEAHSSSRGEAGAPGEEDIQGPTK        | 2784.8             | 3            | 5.0773 | 0.2026 |
| ADAVQDSEMVELVEIR                   | 2047.3             | 2            | 3.1068 | 0.1858 |
| ADAVWNKIQEENVIPR                   | 1883.1             | 3            | 3.6852 | 0.28   |
| ADDKETCFAEEGKK                     | 1571.7             | 3            | 5.0126 | 0.3079 |
| ADDLGKGGNEESTK                     | 1421.4             | 2            | 3.7185 | 0.3755 |
| ADDLGKGGNEESTKKTGNAGSR             | 2065.1             | 3            | 5.2062 | 0.5441 |
| ADDNATIR                           | 875.9              | 2            | 2.5813 | 0.1252 |

| Peptide Sequence              | Peptide mass (m/z) | Charge State | Xcorr  | DelCn2 |
|-------------------------------|--------------------|--------------|--------|--------|
| ADDPSSYMEVVQAANTSGNWEELVK     | 2741.9             | 3            | 5.8265 | 0.502  |
| ADDTSAATIEK                   | 1122.2             | 2            | 2.6321 | 0.1242 |
| ADDTSAATIEKK                  | 1250.3             | 2            | 3.0748 | 0.235  |
| ADDYEQVKNVADYYPEYK            | 2211.3             | 2            | 4.3406 | 0.4265 |
| ADEARPNTIDFGKDDQHFTVTGLHK     | 2814.0             | 3            | 4.488  | 0.2454 |
| ADEGISFR                      | 895.0              | 2            | 2.6669 | 0.2686 |
| ADELQKQKEELQR                 | 1615.8             | 3            | 4.0989 | 0.2899 |
| ADEPQWSLYPSDSQVSEEVK          | 2295.4             | 2            | 4.1841 | 0.3629 |
| ADEPQWSLYPSDSQVSEEVKTR        | 2552.7             | 3            | 3.8694 | 0.3557 |
| ADEVAPAKK                     | 929.1              | 2            | 2.7168 | 0.151  |
| ADFDNTVAIHPTSSEELVTLR         | 2316.5             | 3            | 4.6565 | 0.423  |
| ADFPVDEELGLDLGDLR             | 1962.1             | 2            | 4.1415 | 0.2483 |
| ADFREPNAEVPRPIPHIGPDYIPTEEER  | 3246.5             | 3            | 3.8    | 0.3954 |
| ADFGMSQTDLSLSK                | 1587.7             | 2            | 4.575  | 0.3509 |
| ADGGAEYATYQTK                 | 1375.4             | 2            | 2.4882 | 0.1504 |
| ADGGTQVIDTK                   | 1105.2             | 2            | 3.5302 | 0.3409 |
| ADGKISEQSDAK                  | 1249.3             | 2            | 3.3356 | 0.314  |
| ADGKISEQSDAKLKEIVTNFLAGFEA    | 2783.1             | 3            | 5.5074 | 0.3989 |
| ADGLGAGDVAAVLGPLGLQEVA SFVTKR | 2713.1             | 3            | 3.3124 | 0.2955 |
| ADGTATAPPPR                   | 1054.1             | 2            | 2.5696 | 0.1192 |
| ADGYEPPVQESV                  | 1291.3             | 2            | 2.8611 | 0.2903 |
| ADGYNQPDSK                    | 1095.1             | 2            | 2.5879 | 0.2376 |
| ADGYVDNLAEAVDLLLQHADK         | 2271.5             | 2            | 5.3785 | 0.4556 |
| ADGYVLEGK                     | 952.0              | 2            | 3.0613 | 0.3223 |
| ADGYVLEGKELEFYLR              | 1903.1             | 3            | 5.145  | 0.4033 |
| ADGYVLEGKELEFYLRK             | 2031.3             | 3            | 5.1374 | 0.4313 |
| ADHDFVVQEDFMK                 | 1581.7             | 2            | 4.1825 | 0.3963 |
| ADHGPIGR                      | 952.0              | 2            | 2.5087 | 0.2389 |
| ADHPPAEVTSHAASGAK             | 1646.7             | 3            | 3.8827 | 0.3939 |
| ADHQLPLTEASYVNLPTIALCNTDSPLR  | 2941.3             | 3            | 5.2176 | 0.2995 |
| ADIGVAMGIAGSDVSK              | 1491.7             | 2            | 3.1865 | 0.2858 |
| ADIHLVELLYYVEELDSSLISSFPLLK   | 3108.6             | 2            | 5.2073 | 0.5221 |
| ADILEDKDGK                    | 1104.2             | 2            | 2.9804 | 0.2539 |
| ADIWSLGITAIELAR               | 1629.9             | 2            | 3.2662 | 0.2762 |
| ADKDYHFK                      | 1024.1             | 2            | 2.4525 | 0.1682 |
| ADKDYHFKVDNDENEHQLSLR         | 2574.7             | 3            | 6.4756 | 0.5011 |

| Peptide Sequence                      | Peptide mass (m/z) | Charge State | Xcorr  | DelCn2 |
|---------------------------------------|--------------------|--------------|--------|--------|
| ADKEGDYYVLNGSK                        | 1559.7             | 2            | 3.0465 | 0.3165 |
| ADKLAEHSS                             | 1087.1             | 2            | 2.9716 | 0.3473 |
| ADKNEVAAEVAK                          | 1245.4             | 2            | 3.4488 | 0.159  |
| ADKQEAUFENLDKPGETQVISYEMLHVTPPMSPDVLK | 4255.8             | 3            | 3.234  | 0.1383 |
| ADLAAQYTTVGR                          | 1266.4             | 2            | 4.0235 | 0.3615 |
| ADLDELVAECVYCGELMIR                   | 2214.6             | 2            | 2.5362 | 0.1285 |
| ADLEAQRDVTYEEAKQFAEENGLLFLEASAK       | 3487.8             | 3            | 4.9334 | 0.3439 |
| ADLIAYLK                              | 907.1              | 2            | 2.8006 | 0.2367 |
| ADLIAYLKK                             | 1035.3             | 2            | 2.9131 | 0.2023 |
| ADLINNLGTIAK                          | 1243.4             | 2            | 4.144  | 0.3422 |
| ADLKQLMVHAFIK                         | 1514.9             | 2            | 2.5945 | 0.1018 |
| ADLLGIVSELQLK                         | 1399.7             | 2            | 3.4689 | 0.1639 |
| ADLLLSTQPGREEGSPLELER                 | 2311.5             | 3            | 5.2341 | 0.4499 |
| ADLNQGIGEPQSPSR                       | 1569.7             | 2            | 4.1441 | 0.2898 |
| ADLQKLKDELASTK                        | 1560.8             | 2            | 3.4965 | 0.384  |
| ADLQNHLDTAQNALQDKQQELNK               | 2636.8             | 3            | 3.495  | 0.2003 |
| ADLSGITGAR                            | 961.1              | 2            | 3.5406 | 0.3268 |
| ADLSGMSGAR                            | 965.1              | 2            | 3.4689 | 0.343  |
| ADLSGMSGARDIFISK                      | 1668.9             | 2            | 3.6398 | 0.1569 |
| ADLTALFLPR                            | 1117.3             | 2            | 2.606  | 0.2117 |
| ADLTEYLSTHYK                          | 1441.6             | 2            | 3.4017 | 0.3541 |
| ADLTEYLSTHYKAPR                       | 1765.9             | 3            | 4.149  | 0.4793 |
| ADMEDLMSSKDDVGKNVHELEK                | 2491.7             | 3            | 4.5089 | 0.3716 |
| ADMVIEAVFEDLSLK                       | 1680.9             | 2            | 5.2822 | 0.4226 |
| ADNFEYSDPVDGSISR                      | 1772.8             | 2            | 4.635  | 0.4689 |
| ADNKQKGDVVLQSDHVIETLTK                | 2439.7             | 3            | 3.9641 | 0.3079 |
| ADPSLLGFSVNASSER                      | 1650.8             | 2            | 4.0516 | 0.513  |
| ADPSQFELLK                            | 1148.3             | 2            | 2.797  | 0.216  |
| ADQEEQIHPR                            | 1223.3             | 2            | 3.5188 | 0.1577 |
| ADQPIDADVTVIGSGPGGYVAAIK              | 2315.6             | 2            | 6.6622 | 0.5667 |
| ADQTVLTEDEKK                          | 1377.5             | 2            | 3.2635 | 0.1902 |
| ADQTVLTEDEKKELENLAAMDLELQK            | 2976.3             | 3            | 6.4298 | 0.4042 |
| ADQTVLTEDEKKELENLAAMDLELQKIAEK        | 3417.8             | 3            | 4.9868 | 0.3357 |
| ADRDESSPYAAMLAAQDVAQR                 | 2266.4             | 3            | 5.4323 | 0.3408 |
| ADSERQNQEYQR                          | 1524.5             | 3            | 3.6552 | 0.2049 |
| ADSLKAAVEQEKR                         | 1445.6             | 3            | 3.3639 | 0.3142 |

| Peptide Sequence                      | Peptide mass (m/z) | Charge State | Xcorr  | DelCn2 |
|---------------------------------------|--------------------|--------------|--------|--------|
| ADSQAQLLLSTVVGFTAPGLHLK               | 2466.9             | 3            | 3.2528 | 0.21   |
| ADSVANQGTKVEGITNQGK                   | 1918.1             | 3            | 4.8693 | 0.3192 |
| ADTGLKLPDFQDSIFEYFNTAPLAHDLTFR        | 3444.8             | 3            | 5.4691 | 0.3742 |
| ADTIAKNELHK                           | 1240.4             | 2            | 2.9822 | 0.2137 |
| ADTVSKTELQK                           | 1220.4             | 2            | 3.2097 | 0.2672 |
| ADVAFHFNPR                            | 1174.3             | 2            | 2.738  | 0.1961 |
| ADV FHAYLSLLK                         | 1377.6             | 2            | 2.8769 | 0.279  |
| ADV KGGTLTQYEGK                       | 1467.6             | 2            | 2.6391 | 0.1952 |
| ADV LTTGAGNPVGDKLNIVITVGPR            | 2365.7             | 3            | 5.1904 | 0.3746 |
| ADYLKNYEFPHLQNFIK                     | 2141.4             | 2            | 4.3043 | 0.323  |
| AEAAAAPAAASGPNQMSFTFASPTQVFFNGANVR    | 3400.7             | 3            | 7.0864 | 0.5564 |
| AEAAASALADADADLEERLK                  | 2031.2             | 3            | 3.9623 | 0.2015 |
| AEAAEKLQR                             | 1016.1             | 2            | 2.4027 | 0.1341 |
| AEAARIEGEGSVLQAK                      | 1629.8             | 3            | 4.1195 | 0.288  |
| Aeadkndkavk                           | 1189.3             | 2            | 3.2987 | 0.2611 |
| AeadkndkavkdlvllfetalLSSGFSLEDpQTHSNR | 4160.6             | 3            | 6.0181 | 0.5159 |
| Aeadkndksvk                           | 1205.3             | 2            | 2.449  | 0.2187 |
| AEAEAQAEELSFPR                        | 1548.6             | 2            | 3.2721 | 0.2685 |
| AEAEAWYQTKFETLQAQAGK                  | 2271.5             | 3            | 4.6237 | 0.319  |
| AEAEQEKDQLR                           | 1317.4             | 2            | 3.2239 | 0.1009 |
| AEAERLGHELQQAGLK                      | 1750.9             | 3            | 3.8448 | 0.2549 |
| AEAERPEEQAEASGLKK                     | 1844.0             | 3            | 5.5587 | 0.3591 |
| AEAESMYQIK                            | 1170.3             | 2            | 3.429  | 0.2411 |
| AEAESMYQIKYEELQSLAGK                  | 2289.5             | 3            | 5.9635 | 0.4422 |
| AEAESMYQIKYEELQSLAGKHGDDLRR           | 2983.3             | 3            | 4.4969 | 0.3448 |
| AEAESMYQIKYEELQSLAGKHGDDLRR           | 3139.4             | 3            | 4.2933 | 0.2547 |
| AEAESRAEAARIEGEGSVLQAK                | 2273.4             | 3            | 3.6306 | 0.1259 |
| AEAETLPSLSITK                         | 1360.5             | 2            | 3.7813 | 0.3069 |
| AEAETLPSLSITKLDLQWVQVLSEGWATPLKGFMR   | 3917.5             | 3            | 4.4651 | 0.4106 |
| AEAGAGSATEFQFR                        | 1442.5             | 2            | 3.5258 | 0.2739 |
| AEAGDNLGALVR                          | 1186.3             | 2            | 4.4401 | 0.2912 |
| AEAGEQPGTAER                          | 1216.2             | 2            | 3.4271 | 0.1728 |
| AEAGPEGVAPAPEGEK                      | 1509.6             | 2            | 4.5944 | 0.4443 |
| AEAGPEGVAPAPEGEKK                     | 1637.8             | 2            | 4.5198 | 0.4307 |
| AEAGVPAEFSIWTR                        | 1534.7             | 2            | 4.1398 | 0.3935 |
| AEAQEAEDQQAR                          | 1346.3             | 2            | 4.4614 | 0.3418 |

| Peptide Sequence                  | Peptide mass (m/z) | Charge State | Xcorr  | DelCn2 |
|-----------------------------------|--------------------|--------------|--------|--------|
| AEAQGKQEVESLREK                   | 1702.8             | 3            | 4.0759 | 0.1196 |
| AEASQLGHK                         | 941.0              | 2            | 2.8036 | 0.3653 |
| AEASQLGHKVSQMAQYFEPLTAAVGAASK     | 3105.5             | 3            | 4.9074 | 0.3779 |
| AEASSGDHPTDTEMKEEQK               | 2091.2             | 3            | 4.2669 | 0.4256 |
| AEASSGDHPTDTEMKEEQKSNTAGSQSQVETEA | 3481.5             | 3            | 5.682  | 0.333  |
| AEAYLIEEMYDEAIQDYETAQEHNENDQQIR   | 3760.9             | 3            | 5.1437 | 0.3937 |
| AEDAPLSSGEDPNSR                   | 1545.5             | 2            | 3.4154 | 0.3165 |
| AEDGATPSPSNETPK                   | 1501.5             | 2            | 4.1743 | 0.3448 |
| AEDGATPSPSNETPKK                  | 1629.7             | 2            | 2.9988 | 0.2934 |
| AEDGENYDIKK                       | 1282.3             | 2            | 3.2656 | 0.1531 |
| AEDGHAVAK                         | 898.0              | 2            | 3.1486 | 0.2636 |
| AEDGHAVAKK                        | 1026.1             | 2            | 3.2379 | 0.291  |
| AEDGSSSKEGTSV                     | 1254.2             | 2            | 2.7115 | 0.219  |
| AEDGSVIDYELIDQDAR                 | 1910.0             | 2            | 5.4622 | 0.4028 |
| AEDGSVIDYELIDQDARDLYDAGVK         | 2771.9             | 3            | 4.269  | 0.3189 |
| AEDGSVIDYELIDQDARDLYDAGVKR        | 2928.1             | 3            | 4.7694 | 0.4064 |
| AEDGSVIDYELIDQDARDLYDAGVKRK       | 3056.3             | 3            | 4.6976 | 0.3996 |
| AEDKEWMPVTK                       | 1334.5             | 2            | 2.986  | 0.1964 |
| AEDYPIDLYYLMDLSSYSMKDDLENVK       | 3145.5             | 3            | 3.9931 | 0.29   |
| AEAAQKTESVDNEGE                   | 1636.6             | 2            | 3.3707 | 0.373  |
| AEDEILNR                          | 1089.1             | 2            | 3.0517 | 0.2328 |
| AEEEQAGSAPGAGGTATKTLDK            | 2090.2             | 2            | 2.6184 | 0.1943 |
| AEELGLPILGVLR                     | 1380.7             | 2            | 2.4258 | 0.1528 |
| AEERAELSEGQVR                     | 1474.6             | 2            | 3.3077 | 0.2735 |
| AEEREAWSGGYPGGVLAQLWCCALALQGR     | 3093.5             | 3            | 3.2613 | 0.1877 |
| AEETEQMIEK                        | 1208.3             | 2            | 2.6578 | 0.1872 |
| AEYEFLLTPVEEAPK                   | 1752.9             | 2            | 4.0627 | 0.3614 |
| AEYEFLLTPVEEAPKGMLAR              | 2281.6             | 2            | 4.3834 | 0.4628 |
| AEFAEVSK                          | 881.0              | 1            | 2.5695 | 0.2509 |
| AEFAEVSKLVTDLTK                   | 1651.9             | 2            | 4.7829 | 0.4681 |
| AEFGPPGPGAGSR                     | 1200.3             | 2            | 2.5648 | 0.2223 |
| AEGDVAALNR                        | 1016.1             | 2            | 3.365  | 0.1763 |
| AEGFVDALHR                        | 1115.2             | 2            | 3.3736 | 0.3357 |
| AEGGGATTSTQVMVIK                  | 1550.8             | 2            | 4.1042 | 0.4767 |
| AEQQSAAAHSAHTVKQEDIAVTGK          | 2464.6             | 3            | 5.2118 | 0.4394 |
| AEGNDHIER                         | 1041.1             | 2            | 2.6265 | 0.241  |

| Peptide Sequence                   | Peptide mass (m/z) | Charge State | Xcorr  | DelCn2 |
|------------------------------------|--------------------|--------------|--------|--------|
| AEGNNQAPGEEEEEEATNTHPPASLPSQK      | 3321.3             | 2            | 3.4572 | 0.3982 |
| AEGPEVDVNLPK                       | 1268.4             | 2            | 3.1684 | 0.2778 |
| AEGQLQASPPGAAEGHLEKPVPEPQRK        | 2823.1             | 3            | 4.7613 | 0.3855 |
| AEGQRQAQEYEALLNIK                  | 1962.2             | 3            | 5.5505 | 0.3365 |
| AEGSDVANAVLDGADCIMLSGETAK          | 2438.7             | 2            | 5.6965 | 0.5241 |
| AEGSDVANAVLDGADCIMLSGETAKGDYPLEAVR | 3439.8             | 3            | 5.7556 | 0.4727 |
| AEGSSTASSGSQLAEGK                  | 1567.6             | 2            | 4.1856 | 0.395  |
| AEGTFPGKI                          | 920.0              | 2            | 2.6191 | 0.1802 |
| AEGTFTSDVSSYLEGQAAK                | 1962.1             | 2            | 5.2058 | 0.484  |
| AEGYEVAHGGR                        | 1146.2             | 2            | 2.8996 | 0.2458 |
| AEHDSILAEK                         | 1113.2             | 2            | 3.2838 | 0.2452 |
| AEHDSILAEKAEKDSKPIKVTLPDGK         | 2821.2             | 3            | 5.686  | 0.488  |
| AEIDMLDIR                          | 1076.2             | 2            | 3.4262 | 0.2921 |
| AEIHDLQEEHIKER                     | 1747.9             | 3            | 3.4469 | 0.2866 |
| AEIADKQSGK                         | 1160.3             | 2            | 2.8551 | 0.2571 |
| AEIIHHLADLLTDQRDEILLANK            | 2643.0             | 3            | 3.5885 | 0.3141 |
| AEIIHHLADLLTDQRDEILLANKK           | 2771.2             | 3            | 5.6166 | 0.4633 |
| AEIIHHLADLLTDQRDEILLANKKDLEEAEGR   | 3671.1             | 3            | 5.5673 | 0.4719 |
| AEISELPSIVQDLANGNITWADVEAR         | 2813.1             | 3            | 5.3471 | 0.486  |
| AEISNAIDQYVTGTIGEDEDLIK            | 2495.7             | 2            | 5.0221 | 0.3523 |
| AEISNAIDQYVTGTIGEDEDLIKWK          | 2810.1             | 3            | 4.106  | 0.3278 |
| AEITLVATKPEK                       | 1300.5             | 2            | 3.5121 | 0.2221 |
| AEKDSKPIKVTLPDGK                   | 1727.0             | 2            | 3.6446 | 0.2866 |
| AEKESLESALMGTHQELEMFGSQPAYPEK      | 3239.6             | 3            | 3.7621 | 0.1776 |
| AEKEVAEVKS                         | 1090.2             | 2            | 2.7548 | 0.1191 |
| AEKKGDEYIINGQK                     | 1593.8             | 2            | 4.0752 | 0.3264 |
| AEKNGVKITLPVDFVTADKFDENAK          | 2751.1             | 3            | 6.6744 | 0.4887 |
| AEKPLFSSNPEDNLMIQAIQVLR            | 2728.2             | 3            | 5.5071 | 0.3322 |
| AEKTEVLSDLLQIER                    | 1874.1             | 2            | 3.3989 | 0.2209 |
| AELATEEFLPVTPILEGFVILR             | 2458.9             | 3            | 5.2087 | 0.4242 |
| AELDEVNNSAK                        | 1204.3             | 2            | 3.0058 | 0.1705 |
| AELEEKGHSATGK                      | 1357.5             | 2            | 3.1296 | 0.2828 |
| AELEIQKDALEPGQR                    | 1697.9             | 2            | 3.7016 | 0.2374 |
| AELEKHGYKMETS                      | 1523.7             | 2            | 2.949  | 0.2077 |
| AELGIPLEEVPEEINYLTR                | 2283.6             | 2            | 2.9563 | 0.1671 |
| AELINIHHLMVELKK                    | 1789.2             | 3            | 3.3083 | 0.3188 |

| Peptide Sequence                  | Peptide mass (m/z) | Charge State | Xcorr  | DelCn2 |
|-----------------------------------|--------------------|--------------|--------|--------|
| AELIVQPELKYGDGIQLTR               | 2144.5             | 3            | 4.207  | 0.34   |
| AELNDKVVHK                        | 1054.2             | 2            | 2.4649 | 0.1269 |
| AELNEFLTR                         | 1093.2             | 2            | 2.8545 | 0.1467 |
| AELQTALAHTQHAAR                   | 1618.8             | 2            | 3.2199 | 0.3561 |
| AELRAPPDKIAIIGAGIGGTSAAYYLR       | 2746.2             | 3            | 4.7349 | 0.4145 |
| AELRDDPIISTHLAK                   | 1679.9             | 2            | 3.3524 | 0.293  |
| AELRDLELEEARLVQELEDVDRNNAR        | 3097.3             | 3            | 3.3229 | 0.1012 |
| AELSEGQVR                         | 989.1              | 2            | 3.0655 | 0.1197 |
| AEMDQILHGLDK                      | 1370.6             | 2            | 2.5545 | 0.1106 |
| AEMDQILHGLDKVAEEWAQGTFK           | 2617.9             | 3            | 4.2943 | 0.2596 |
| AEMPASEKYSEKEDKYEEEEIKLLSDK       | 3091.4             | 3            | 3.717  | 0.2295 |
| AENFFILR                          | 1010.2             | 2            | 3.2918 | 0.1688 |
| AENFKQVEYLLIHGTADDNVHFQQSAQISK    | 3432.7             | 3            | 5.1954 | 0.3525 |
| AENGLKLVINGNPITIFQER              | 2114.4             | 3            | 5.0494 | 0.4256 |
| AENGLKLVINGNPITIFQERDPSK          | 2541.8             | 3            | 5.1732 | 0.4397 |
| AENLQLLTENELHR                    | 1680.8             | 2            | 2.7247 | 0.1937 |
| AENNSEVGASGYGVPGPWTWR             | 2164.2             | 2            | 5.1746 | 0.4651 |
| AENQVLAMR                         | 1032.2             | 2            | 3.2738 | 0.2761 |
| AENSQLTER                         | 1048.1             | 2            | 3.2057 | 0.2262 |
| AENSSLNLIGK                       | 1146.3             | 2            | 2.4694 | 0.1524 |
| AENYDIPSADR                       | 1251.3             | 2            | 3.5257 | 0.3499 |
| AENYDIPSADRHK                     | 1516.6             | 2            | 3.4935 | 0.338  |
| AEPAKIEAFR                        | 1132.3             | 2            | 2.8236 | 0.2325 |
| AEPAKIEAFRASLSK                   | 1618.9             | 2            | 3.7775 | 0.2261 |
| AEPDVKKLEDQLQGGQLEEVILQAEHELNLAR  | 3615.0             | 3            | 6.4156 | 0.4226 |
| AEPDVKKLEDQLQGGQLEEVILQAEHELNLARK | 3743.2             | 3            | 4.5711 | 0.2625 |
| AEPEDHYFLLTEPPLNTPENR             | 2483.7             | 3            | 3.5176 | 0.1925 |
| AEPLETFFPDQSK                     | 1509.6             | 2            | 2.7967 | 0.1282 |
| AEPKAPKPEQEQAAPGPAAGGEAPK         | 2299.5             | 3            | 4.7027 | 0.3953 |
| AEQDITTLEQSISRLEGQVLR             | 2387.6             | 3            | 4.3073 | 0.3288 |
| AEQEEEFISNTLFKK                   | 1814.0             | 2            | 3.2922 | 0.285  |
| AEQINQAAGEASAVLAK                 | 1671.8             | 2            | 2.825  | 0.2645 |
| AEQLAQQAHNSNR                     | 1353.4             | 2            | 3.8014 | 0.3871 |
| AEQLAQQAHNSNRK                    | 1481.6             | 2            | 3.8223 | 0.2259 |
| AEQLGAEGNVDESQK                   | 1575.6             | 2            | 2.7885 | 0.1965 |
| AEQMASVQNAQR                      | 1333.5             | 2            | 2.8921 | 0.1593 |

| Peptide Sequence                    | Peptide mass (m/z) | Charge State | Xcorr  | DelCn2 |
|-------------------------------------|--------------------|--------------|--------|--------|
| AEQSKAEEAQR                         | 1247.3             | 2            | 2.6963 | 0.1084 |
| AEQSLHDLQER                         | 1326.4             | 2            | 2.5971 | 0.1217 |
| AERDSALETLQGQLEEKAEQELGHSQSALASAQR  | 3553.8             | 3            | 8.5488 | 0.5163 |
| AERLDVLEQQR                         | 1357.5             | 2            | 2.566  | 0.2027 |
| AERQHQLYVGVLGSK                     | 1685.9             | 2            | 2.9998 | 0.2896 |
| AERVHELNEEIGKLLAK                   | 1950.2             | 3            | 4.587  | 0.1502 |
| AESAPLPVSADDTPEVLNR                 | 1982.1             | 2            | 4.3828 | 0.4787 |
| AESEEMETSQAGSK                      | 1484.5             | 2            | 4.3601 | 0.3998 |
| AESMLQQADK                          | 1121.2             | 2            | 2.7689 | 0.1882 |
| AETAAKHGAEAVK                       | 1340.5             | 2            | 3.6767 | 0.2225 |
| AETGDKVYVHLK                        | 1360.5             | 2            | 2.6036 | 0.1237 |
| AETSEGSAPSAPVPEASAPK                | 1931.0             | 2            | 4.6363 | 0.4057 |
| AEVDLVVQDLK                         | 1229.4             | 2            | 2.8641 | 0.2952 |
| AEVEGKDLPEHAVLK                     | 1635.8             | 2            | 4.5579 | 0.3392 |
| AEVGEKTEER                          | 1148.2             | 2            | 2.8769 | 0.2766 |
| AEVLGHKTPEPAPR                      | 1502.7             | 2            | 3.2704 | 0.3379 |
| AEVQKLQALANEQAAAAHELEK              | 2363.6             | 3            | 5.4775 | 0.3485 |
| AEVQNLGGELVVSQVDSAMSLIQAQK          | 2587.9             | 3            | 4.0673 | 0.2538 |
| AFAAQEDLEKTKEELK                    | 1851.0             | 3            | 3.2    | 0.2501 |
| AFADALEVIPMALSENSGMNPIQTMTEVR       | 3137.6             | 2            | 5.3835 | 0.483  |
| AFADAMEVIPSTLAENAGLNPISTVTELR       | 3032.4             | 2            | 4.9689 | 0.44   |
| AFAEKNNLSFIETSALDSTNVEEAFKNILTEIYR  | 3880.3             | 3            | 5.7611 | 0.4358 |
| AFAETHIK                            | 917.0              | 2            | 2.4407 | 0.1222 |
| AFAETHIKGFTLNDAANSR                 | 2064.2             | 3            | 3.3802 | 0.235  |
| AFAGDIANQLATDAVQILGGNGFNTEYPVEK     | 3225.5             | 3            | 6.1088 | 0.5034 |
| AFAGDIANQLATDAVQILGGNGFNTEYPVEKLMR  | 3626.1             | 3            | 5.8866 | 0.4874 |
| AFAHITGGGLENIPR                     | 1666.9             | 2            | 4.019  | 0.3375 |
| AFAKELFLGK                          | 1124.4             | 2            | 3.2257 | 0.3184 |
| AFAMIIDKLEEDINSSMTNSTAASRPPVTLR     | 3380.8             | 3            | 5.6678 | 0.4266 |
| AFAMIIDKLEEDISSMTNSTAASRPPVTLR      | 3353.8             | 3            | 4.6155 | 0.3811 |
| FAVVASALGIPSLLPFLK                  | 1915.4             | 2            | 3.5641 | 0.1241 |
| AFDLFNPVK                           | 1213.4             | 2            | 2.8476 | 0.1563 |
| AFDLIVDRPVTLVR                      | 1614.9             | 3            | 3.7872 | 0.3961 |
| AFDLVPPEAVPEQKDPDPEFPTVK            | 2667.0             | 2            | 2.596  | 0.1002 |
| AFDRNTESLFEELSSAGSGLIGDVDEGADLLGMGR | 3630.9             | 3            | 5.1681 | 0.3656 |
| AFDSGIIPMEFVNK                      | 1568.8             | 2            | 4.6322 | 0.4358 |



| Peptide Sequence                      | Peptide mass (m/z) | Charge State | Xcorr  | DelCn2 |
|---------------------------------------|--------------------|--------------|--------|--------|
| AFEALLSNIVKPVASDIQAR                  | 2143.5             | 2            | 2.9075 | 0.1933 |
| AFEAVDKAYK                            | 1142.3             | 2            | 2.8261 | 0.3365 |
| AFEEAEKNAPAIIFIDELDAIAPK              | 2616.9             | 2            | 4.962  | 0.4053 |
| AFEEAEKNAPAIIFIDELDAIAPKR             | 2773.1             | 3            | 5.9709 | 0.5001 |
| AFEEDQVAGR                            | 1122.2             | 2            | 2.6167 | 0.1908 |
| AFEGQAHGADR                           | 1159.2             | 2            | 2.78   | 0.1874 |
| AFEKNIFNK                             | 1111.3             | 2            | 2.6355 | 0.1864 |
| AFEVMDEFDGR                           | 1316.4             | 2            | 3.248  | 0.3622 |
| AFFESHAPSAER                          | 1446.5             | 2            | 3.0756 | 0.3232 |
| AFFSEVER                              | 985.1              | 2            | 2.5956 | 0.1255 |
| AFGEGASARPR                           | 1119.2             | 2            | 2.4305 | 0.1341 |
| AFGFNVLFYDPYLSDGVER                   | 2210.4             | 2            | 4.7128 | 0.3857 |
| AFGFHLEALLDDSK                        | 1650.8             | 2            | 5.0621 | 0.4479 |
| AFGFHLEALLDDSKELQR                    | 2177.4             | 3            | 5.6204 | 0.4711 |
| AFGHHAVSLLDGGLR                       | 1550.7             | 2            | 4.111  | 0.4397 |
| AFGPGLQGGSAGSPAR                      | 1430.6             | 2            | 4.4431 | 0.3513 |
| AFGPSETNESPVVLEPPVVSMEVSEPHILETLKPATK | 4032.6             | 3            | 5.3709 | 0.4423 |
| AFGYYGPLR                             | 1044.2             | 2            | 2.7979 | 0.3343 |
| AFHEDKKPSK                            | 1187.3             | 2            | 2.6429 | 0.1078 |
| AFHNEAQVNPER                          | 1412.5             | 2            | 3.8227 | 0.3397 |
| AFHNEAQVNPERK                         | 1540.7             | 3            | 4.1906 | 0.3355 |
| AFHPFIAGPYNR                          | 1390.6             | 2            | 3.3565 | 0.3434 |
| AFIDQGKLIPDDVMTR                      | 1820.1             | 2            | 3.3098 | 0.1929 |
| AFIPAIDSFGFETDLR                      | 1800.0             | 2            | 4.157  | 0.3255 |
| AFIPLPSAVVQAVFGR                      | 1673.0             | 3            | 3.9062 | 0.4326 |
| AFITNIPFDVK                           | 1265.5             | 2            | 3.9558 | 0.2622 |
| AFITNIPFDVKWQSLKDLVK                  | 2363.8             | 3            | 4.1575 | 0.2085 |
| AFKAWAVAR                             | 1020.2             | 2            | 2.8104 | 0.2293 |
| AFKDIDIEDLEELDPDFIMAK                 | 2468.8             | 2            | 5.9049 | 0.451  |
| AFKDKVDVASVIVTK                       | 1620.9             | 2            | 3.4781 | 0.2679 |
| AFKEVGIEFMDLYSHLVPVYDVEPLEK           | 3169.6             | 3            | 4.2374 | 0.2991 |
| AFLADPSAFVAAAPVAAATTAAPAAAAAPAK       | 2754.1             | 2            | 5.7907 | 0.4382 |
| AFLADPSAFVAAAPVAAATTAAPAAAAAPAKVEAK   | 3181.6             | 3            | 5.2561 | 0.4037 |
| AFLAQIHAR                             | 1027.2             | 2            | 2.8769 | 0.2141 |
| AFLASPEYVNLPIGNGK                     | 1905.1             | 2            | 5.58   | 0.4309 |
| AFLASPEYVNLPIGNGKQ                    | 2033.3             | 3            | 5.3448 | 0.3863 |

| Peptide Sequence                | Peptide mass (m/z) | Charge State | Xcorr  | DelCn2 |
|---------------------------------|--------------------|--------------|--------|--------|
| AFLDALQNQAEASSK                 | 1593.7             | 2            | 5.1483 | 0.3947 |
| AFLDFHALPYQVVEVNPVR             | 2215.5             | 2            | 4.6735 | 0.3437 |
| AFLDFHALPYQVVEVNPVRR            | 2371.7             | 3            | 3.3717 | 0.2242 |
| AFLEENLDYIIR                    | 1610.8             | 2            | 4.0282 | 0.3018 |
| AFLIEEQKIVVK                    | 1417.7             | 2            | 3.689  | 0.2027 |
| AFLMQHAPANDYLVTSHIHLHVPEGATPK   | 3196.6             | 3            | 4.3126 | 0.4082 |
| AFLQGGQEATDIALLLR               | 1817.1             | 2            | 3.2136 | 0.2273 |
| AFLSPPTLLEGPLR                  | 1511.8             | 2            | 2.8391 | 0.2006 |
| AFLSTHPNTETVFEAFLK              | 2053.3             | 2            | 4.0747 | 0.125  |
| AFLTAEIDILR                     | 1262.5             | 2            | 4.6119 | 0.357  |
| AFLTAEIDILRK                    | 1390.7             | 2            | 3.5554 | 0.2918 |
| AFMTADLPNELIELLEK               | 1948.3             | 2            | 5.2457 | 0.4237 |
| AFNLVKDSATGLSK                  | 1451.6             | 2            | 3.1123 | 0.268  |
| AFPALTSLDLSDNPGLGER             | 1974.2             | 2            | 5.2152 | 0.5083 |
| AFQNVFAPR                       | 1050.2             | 2            | 2.8816 | 0.3094 |
| AFQYVETHGEVCPANWTPDSPTIKPSPAASK | 3330.7             | 3            | 6.0426 | 0.4229 |
| AFREEAIKFSEEQR                  | 1740.9             | 3            | 4.2376 | 0.3579 |
| AFSDPFVEAEKSNLAYDIVQLPTGLTGIK   | 3125.5             | 3            | 4.5995 | 0.4118 |
| AFSGYLGTDQSK                    | 1274.4             | 2            | 2.8989 | 0.283  |
| AFSQFGKLER                      | 1183.3             | 2            | 2.8103 | 0.1808 |
| AFSVFLFNTENK                    | 1417.6             | 2            | 3.9701 | 0.3686 |
| AFSVNIFK                        | 926.1              | 2            | 2.4473 | 0.2488 |
| AFSYYGPLR                       | 1074.2             | 2            | 2.9624 | 0.2728 |
| AFTELQAK                        | 908.0              | 2            | 2.4138 | 0.1514 |
| AFTGFIVEADTPGIQIGR              | 1893.1             | 2            | 4.5544 | 0.4845 |
| AFTGFIVEADTPGIQIGRK             | 2021.3             | 2            | 4.3758 | 0.3952 |
| AFTGREFDELNPSAQR                | 1839.0             | 2            | 4.2602 | 0.2879 |
| AFTHTAQYDEAISDYFR               | 2036.1             | 2            | 4.9203 | 0.4606 |
| AFTHTAQYDEAISDYFRK              | 2164.3             | 3            | 5.447  | 0.3496 |
| AFVAIGDYNGHVGLGVK               | 1717.9             | 2            | 3.082  | 0.1219 |
| AFVDFLSDEIKEER                  | 1698.9             | 2            | 3.6198 | 0.3048 |
| AFVEQVANVVLYSSDYVVK             | 2195.5             | 3            | 3.5909 | 0.1626 |
| AFVGEVGAR                       | 906.0              | 2            | 2.4107 | 0.1841 |
| AFVHWYVGEGMEEGEFSEAR            | 2331.5             | 3            | 3.8362 | 0.1612 |
| AFVHWYVGEGMEEGEFSEAREDMAALEK    | 3219.5             | 3            | 4.1963 | 0.2216 |
| AFVRPSGTEDVVR                   | 1433.6             | 2            | 3.4752 | 0.2174 |

| Peptide Sequence                              | Peptide mass (m/z) | Charge State | Xcorr  | DelCn2 |
|-----------------------------------------------|--------------------|--------------|--------|--------|
| AFYAELYHIISSNLEK                              | 1899.1             | 2            | 5.4815 | 0.4944 |
| AFYAPVHADDLREGAQYLMQAAGLGR                    | 2822.2             | 3            | 3.5372 | 0.1648 |
| AFYGDTLVTGFAR                                 | 1418.6             | 2            | 4.2412 | 0.4582 |
| AFYNNVLGEYEEYITK                              | 1954.1             | 2            | 4.4115 | 0.372  |
| AFYPEEISSMVLTK                                | 1615.9             | 3            | 4.4046 | 0.4599 |
| AFYVNVLNEEQR                                  | 1482.6             | 2            | 4.2658 | 0.3689 |
| AGAAGGPEEEEAEKPVK                             | 1540.7             | 2            | 4.4116 | 0.3495 |
| AGAAPYVQAFDSLLAGPVAEYLK                       | 2352.7             | 2            | 6.1747 | 0.5239 |
| AGADEERAETAR                                  | 1276.3             | 2            | 2.7845 | 0.1769 |
| AGAEVVKQVEHPLLSGLLYPGLQALDEEYLK               | 3381.9             | 3            | 4.7546 | 0.2998 |
| AGAGSATLSMAYAGAR                              | 1455.6             | 2            | 4.7242 | 0.4531 |
| AGAIAPCEVTVPAQNTGLGPEK                        | 2124.4             | 2            | 4.8152 | 0.3867 |
| AGALNSNDAFVLK                                 | 1320.5             | 2            | 3.7406 | 0.3536 |
| AGALNSNDAFVLKTPSAAYLWVGTGASEAEKTGAQELLR       | 4009.4             | 3            | 6.4519 | 0.4692 |
| AGATLDLLVENMGR                                | 1460.7             | 2            | 4.4263 | 0.395  |
| AGATSEGVLANFFNSLLSK                           | 1927.1             | 2            | 5.5968 | 0.4716 |
| AGATSEGVLANFFNSLLSKK                          | 2055.3             | 2            | 4.8864 | 0.408  |
| AGAVEKGVPLYR                                  | 1260.5             | 2            | 3.3062 | 0.2642 |
| AGAVGAHLPASGLDIFGDLK                          | 1910.2             | 2            | 2.7366 | 0.1843 |
| AGAVGAHLPASGLDIFGDLKK                         | 2038.3             | 3            | 5.8038 | 0.4564 |
| AGAVNPTVK                                     | 857.0              | 2            | 2.8001 | 0.1721 |
| AGAYDFPSPEWDTVTPEAK                           | 2082.2             | 2            | 4.4979 | 0.4624 |
| AGDEFVEK                                      | 894.9              | 2            | 2.9371 | 0.1738 |
| AGDEFVEKTLSTIATSTDAASVVHSTDLVVEAIVENLK        | 3962.4             | 3            | 8.0411 | 0.5463 |
| AGDEFVEKTLSTIATSTDAASVVHSTDLVVEAIVENLKVKNELFK | 4821.4             | 3            | 4.7564 | 0.3803 |
| AGDGDGWVSLAELR                                | 1446.5             | 2            | 3.0976 | 0.2526 |
| AGDKPHMQTYEVDLNK                              | 1847.0             | 3            | 4.1623 | 0.2452 |
| AGDLRDTGIFLDLMHLK                             | 1916.2             | 3            | 4.4079 | 0.1509 |
| AGDMENAENILTVMR                               | 1664.9             | 2            | 4.3211 | 0.3643 |
| AGDPLDLVALAEQVQKADEFIR                        | 2399.7             | 3            | 4.6439 | 0.324  |
| AGEAGKLEEVMQELR                               | 1660.9             | 2            | 4.8652 | 0.3968 |
| AGEARPGPTAESASGPSSEDPVSNFLK                   | 2572.7             | 3            | 5.7466 | 0.4142 |
| AGEERAPAHAQSFLAQQR                            | 1968.1             | 3            | 4.8901 | 0.3273 |
| AGEGNEEISNMIHSYIKEIEDLRAK                     | 2848.1             | 3            | 4.298  | 0.342  |
| AGEIKGFTGIDSDYEKPEPPER                        | 2440.6             | 2            | 5.7918 | 0.478  |
| AGEKELILTVLSVPPHEADNLDPSDDSLGQSFYDYTEK        | 4195.5             | 3            | 4.5317 | 0.27   |

| Peptide Sequence              | Peptide mass (m/z) | Charge State | Xcorr  | DelCn2 |
|-------------------------------|--------------------|--------------|--------|--------|
| AGELTEDEVER                   | 1248.3             | 2            | 3.3129 | 0.2954 |
| AGELTEDEVERVITIMQNPR          | 2301.6             | 3            | 3.2644 | 0.1153 |
| AGEQLAPFLPQLVPR               | 1636.9             | 2            | 3.1057 | 0.2877 |
| AGEVERDLKADSMIR               | 1806.0             | 3            | 3.5473 | 0.2447 |
| AGEVFIHK                      | 901.0              | 2            | 3.0315 | 0.1677 |
| AGEVFIHKDK                    | 1144.3             | 2            | 2.8537 | 0.2018 |
| AGEVFIHKDKGFGFIR              | 1822.1             | 2            | 2.7912 | 0.1032 |
| AGEVINQPMMAAR                 | 1519.8             | 2            | 3.4532 | 0.1705 |
| AGFAALQLEYFFTAGPDEV           | 2203.4             | 2            | 3.3518 | 0.2907 |
| AGFAGDDAPR                    | 977.0              | 2            | 3.6218 | 0.3928 |
| AGFAGDQIPK                    | 1004.1             | 2            | 3.0526 | 0.1008 |
| AGFALDEGIANPTDAFTVFYSER       | 2492.7             | 2            | 5.1226 | 0.4056 |
| AGFIQDTSLILYEEVKPNLTER        | 2537.8             | 3            | 3.2756 | 0.1712 |
| AGFLAFTQLPK                   | 1193.4             | 2            | 2.8281 | 0.1124 |
| AGFLDLKDFLPK                  | 1364.6             | 2            | 3.3314 | 0.1278 |
| AGFLDLKDFLPKEYVK              | 1884.2             | 3            | 4.0697 | 0.2254 |
| AGFLHHVK                      | 909.1              | 2            | 2.8087 | 0.234  |
| AGGAAQLALDKSDSHPSDALTR        | 2182.3             | 3            | 5.4788 | 0.4255 |
| AGGAAVVITEPEHTKER             | 1765.9             | 2            | 3.7972 | 0.2226 |
| AGGADAVQTVTGLR                | 1373.5             | 2            | 4.0587 | 0.2667 |
| AGGAGVPAFYTPGTGTLVQEGGSPK     | 2596.9             | 2            | 4.8324 | 0.3126 |
| AGGANFDAQTE                   | 1097.1             | 1            | 2.2367 | 0.1715 |
| AGGDTHLGK                     | 855.9              | 2            | 2.5593 | 0.1404 |
| AGGEELDEGVAKDNAK              | 1603.7             | 2            | 4.4421 | 0.352  |
| AGGEELDEGVAKDNAKIDGATQSSPAEPK | 2886.0             | 3            | 4.64   | 0.214  |
| AGGGAGDPGLGAAAAPAPETR         | 1764.9             | 2            | 4.3831 | 0.4049 |
| AGGGDRK GK                    | 845.9              | 2            | 2.7649 | 0.1084 |
| AGGGRPSSPSVSEKEKEELER         | 2513.7             | 3            | 6.6898 | 0.4645 |
| AGGIETIANEFSDR                | 1480.6             | 2            | 3.9371 | 0.4212 |
| AGGIETIANEYSDR                | 1496.6             | 2            | 3.8373 | 0.4177 |
| AGGITQVQYILPTLPQQLQVAPAPAPGTK | 3127.6             | 3            | 3.538  | 0.2772 |
| AGGKEFLETVK                   | 1179.3             | 2            | 3.4253 | 0.2155 |
| AGGKEFLETVKELR                | 1577.8             | 3            | 5.0798 | 0.3595 |
| AGGKEFLETVKELRK               | 1706.0             | 2            | 3.9204 | 0.2478 |
| AGGKILTFDQLALDSPK             | 1775.0             | 2            | 4.9265 | 0.3997 |
| AGGMATTGKEAVLDVIPTDIHQR       | 2381.7             | 3            | 5.2692 | 0.2685 |

| Peptide Sequence                  | Peptide mass (m/z) | Charge State | Xcorr  | DelCn2 |
|-----------------------------------|--------------------|--------------|--------|--------|
| AGGPATPLSPTR                      | 1125.3             | 2            | 2.6658 | 0.2445 |
| AGGPGLERGEAGVPAEFSIWTR            | 2258.5             | 2            | 5.1621 | 0.3803 |
| AGGPLGLSIVGGSDHSSHPFGVQEPGVFISK   | 3035.4             | 3            | 4.311  | 0.2656 |
| AGGPSTPLSPTR                      | 1155.3             | 2            | 3.2986 | 0.2408 |
| AGGQPPGQSAGGK                     | 1112.2             | 2            | 2.6588 | 0.1549 |
| AGGSAALSPSK                       | 946.0              | 2            | 3.3412 | 0.2703 |
| AGGSASAMLQPLLDNQVGFK              | 2005.3             | 3            | 5.8271 | 0.4806 |
| AGGSASAMLQPLLDNQVGFKNMQNVFVPLSLDR | 3639.1             | 3            | 4.3719 | 0.3297 |
| AGGSFDLR                          | 822.9              | 2            | 2.4577 | 0.1266 |
| AGGTEIGKTLAEK                     | 1275.4             | 2            | 3.3237 | 0.3225 |
| AGGTPKPKPVGAAGK                   | 1310.6             | 2            | 2.5399 | 0.17   |
| AGGVFTPGAFAFSK                    | 1210.4             | 2            | 2.8335 | 0.2441 |
| AGGVLAYELLPALDEVLASDSR            | 2260.5             | 2            | 3.1966 | 0.2033 |
| AGHFDKEIVPVLVSTR                  | 1769.0             | 2            | 4.5814 | 0.4124 |
| AGHGAGKPTAK                       | 995.1              | 2            | 2.6431 | 0.2076 |
| AGHKATLEEAR                       | 1183.3             | 2            | 3.8547 | 0.3557 |
| AGHYAASIIIR                       | 1172.4             | 2            | 3.0317 | 0.2239 |
| AGIAHLYGIAGSTNVTGDQVK             | 2073.3             | 3            | 3.9011 | 0.3367 |
| AGIDPNAITYGYYNK                   | 1660.8             | 2            | 2.6961 | 0.1692 |
| AGIEVQEIKDSEHKLETSSGR             | 2314.5             | 3            | 4.7874 | 0.4256 |
| AGIFQSVK                          | 850.0              | 2            | 2.8847 | 0.1304 |
| AGIIASAR                          | 758.9              | 1            | 1.6581 | 0.146  |
| AGIIQDTWHK                        | 1169.3             | 2            | 2.8829 | 0.2265 |
| AGIKVTVAGLAGKDPVQCSR              | 1971.3             | 3            | 4.2161 | 0.2192 |
| AGIPKEEVKEAYMGNVLQGGEGQAPTR       | 2831.2             | 3            | 5.908  | 0.4807 |
| AGITSAMATR                        | 979.1              | 2            | 2.7902 | 0.1067 |
| AGIVQEDVQPPGLK                    | 1451.6             | 2            | 3.9076 | 0.3681 |
| AGKDLVSSLTSGLLTIGDR               | 1904.2             | 2            | 6.2529 | 0.5548 |
| AGKDLVSSLTSGLLTIGDRFVGGALDAAAK    | 2806.2             | 3            | 5.5362 | 0.5045 |
| AGKEPGLQIWR                       | 1255.5             | 3            | 4.1311 | 0.3038 |
| AGKEVLLEVK                        | 1086.3             | 2            | 2.5519 | 0.1667 |
| AGKFPSLLTHNENMVAK                 | 1858.2             | 3            | 3.9499 | 0.3186 |
| AGKITDEEATK                       | 1163.3             | 2            | 2.5602 | 0.1785 |
| AGKLDPHLVLDQLR                    | 1575.8             | 2            | 4.6393 | 0.4303 |
| AGKLIENVDPKAVQLYQQTANVFENEER      | 3334.6             | 3            | 5.1637 | 0.3392 |
| AGKLIENVDPKAVQLYQQTANVFENEERLR    | 3604.0             | 3            | 4.2667 | 0.2468 |

| Peptide Sequence                | Peptide mass (m/z) | Charge State | Xcorr  | DelCn2 |
|---------------------------------|--------------------|--------------|--------|--------|
| AGKPVICATQMLESNIK               | 1821.3             | 3            | 4.5305 | 0.4575 |
| AGLAASLAGPHSIVGR                | 1477.7             | 2            | 3.3319 | 0.279  |
| AGLEPFFDFIVSINGSR               | 1870.1             | 2            | 4.6626 | 0.4141 |
| AGLGSGLSLSGLVHPELSR             | 1851.1             | 2            | 4.8589 | 0.4554 |
| AGLGSPERPPK                     | 1109.3             | 2            | 2.7588 | 0.2383 |
| AGLIDWNMFVK                     | 1294.5             | 2            | 2.5997 | 0.1126 |
| AGLLAGDRLVEVNGENVEKETHQQVVSR    | 3049.3             | 3            | 8.5007 | 0.4357 |
| AGLLEPEVFHLNPAK                 | 1635.9             | 2            | 4.2928 | 0.2868 |
| AGLLGQPR                        | 812.0              | 2            | 2.5237 | 0.1535 |
| AGLLHNILPSQSTDHLHHSVGETELLSLVYK | 3144.6             | 3            | 5.6004 | 0.3773 |
| AGLLPSGPRPGYAAIQALLSSR          | 2196.5             | 3            | 3.3023 | 0.2023 |
| AGLLRPDYALLGHR                  | 1552.8             | 2            | 2.5766 | 0.1288 |
| AGLLTEQAPGDTLTAVESK             | 1902.1             | 2            | 3.0274 | 0.1801 |
| AGLQDASGNLVPLEDVHIK             | 1977.2             | 2            | 2.4478 | 0.1652 |
| AGLQFPVGR                       | 945.1              | 2            | 3.419  | 0.2015 |
| AGLQSLEASGR                     | 1089.2             | 2            | 2.6682 | 0.1571 |
| AGLQSLEASGRLEDEFDMFALTR         | 2557.8             | 3            | 5.0211 | 0.3553 |
| AGLQVYK                         | 893.0              | 1            | 3.5259 | 0.1924 |
| AGLSLKDMDLVEVNEAFAPQYLAVR       | 2880.3             | 3            | 6.6396 | 0.4381 |
| AGLSQSLFER                      | 1108.2             | 2            | 2.6163 | 0.2843 |
| AGLTDQVSHHAR                    | 1292.4             | 2            | 3.0133 | 0.3059 |
| AGLTHLITMDLHQK                  | 1578.9             | 3            | 4.2908 | 0.4179 |
| AGLTMNDIDAFEFHEAFSGQILANFK      | 2888.2             | 3            | 4.6276 | 0.332  |
| AGLVDDFEKK                      | 1122.3             | 1            | 2.9306 | 0.2524 |
| AGLVGPEFHEK                     | 1184.3             | 2            | 2.6321 | 0.1335 |
| AGMGAHFR                        | 847.0              | 2            | 2.6387 | 0.1464 |
| AGMSAEQAQGLLEK                  | 1433.6             | 2            | 4.3874 | 0.3044 |
| AGMSYYNSPGLHVQHMGTSHGITRPSR     | 3040.4             | 3            | 3.2772 | 0.2686 |
| AGNAIHAILLYR                    | 1312.5             | 2            | 3.1019 | 0.2846 |
| AGNASKDEIDSAVK                  | 1405.5             | 2            | 3.2896 | 0.2998 |
| AGNFIGWLHIDGANLSVLLVEHALSK      | 2776.2             | 3            | 4.1338 | 0.311  |
| AGNFYVPAEPK                     | 1193.3             | 2            | 2.5888 | 0.1321 |
| AGNILLNTEGHAK                   | 1338.5             | 2            | 3.0666 | 0.2089 |
| AGNKEATDEELEK                   | 1434.5             | 2            | 2.9793 | 0.2112 |
| AGNKEATDEELER                   | 1462.5             | 2            | 2.4779 | 0.1661 |
| AGNLGGGVVTIER                   | 1243.4             | 2            | 2.7517 | 0.1654 |

| Peptide Sequence                    | Peptide mass (m/z) | Charge State | Xcorr  | DelCn2 |
|-------------------------------------|--------------------|--------------|--------|--------|
| AGNNMLLVGVHGPR                      | 1435.7             | 2            | 3.9925 | 0.3955 |
| AGNYEEALQLYQHAVQYFLHVVK             | 2722.0             | 3            | 3.8015 | 0.1932 |
| AGNYLRPYPVGEQEIHHTGR                | 2295.5             | 3            | 5.2446 | 0.3291 |
| AGPAHAGHTAPMRPSYSAQEGLAGYQR         | 2783.0             | 3            | 3.6675 | 0.2635 |
| AGPESDAQYQFTGIKK                    | 1740.9             | 2            | 4.4966 | 0.3816 |
| AGPGTLSVTIEGPSK                     | 1414.6             | 2            | 3.8929 | 0.3728 |
| AGPGVVR                             | 655.8              | 1            | 1.6508 | 0.243  |
| AGPHKEIYPYVIQELRPTLNELGISTPEELGLDK  | 3822.3             | 3            | 4.9019 | 0.2762 |
| AGPHKEIYPYVIQELRPTLNELGISTPEELGLDKV | 3921.4             | 3            | 6.5937 | 0.547  |
| AGPIWDLR                            | 928.1              | 2            | 2.8229 | 0.1946 |
| AGPKADGEEDEVK                       | 1345.4             | 2            | 3.1067 | 0.2669 |
| AGPPPIQDGEFTFLLPAGR                 | 1984.2             | 2            | 4.9809 | 0.473  |
| AGPPSEILPLVQAVPK                    | 1616.9             | 2            | 2.8539 | 0.1535 |
| AGQAVDDFIEK                         | 1193.3             | 2            | 2.8452 | 0.2208 |
| AGQAVDDFIEKLVPLLDTGDIIDGGNSEYR      | 3335.7             | 3            | 4.4054 | 0.3464 |
| AGQAVDDFIEKLVPLLDTGDIIDGGNSEYRDTR   | 3809.1             | 3            | 3.6827 | 0.2406 |
| AGQAVDDFIEKLVPLLDTGDIIDGGNSEYRDTRR  | 3965.3             | 3            | 3.4829 | 0.2332 |
| AGQEHLR                             | 924.0              | 2            | 2.927  | 0.1363 |
| AGQLLSELFTRK                        | 1477.7             | 2            | 3.669  | 0.2819 |
| AGQPLQLLDASWYLPK                    | 1801.1             | 2            | 3.3164 | 0.2188 |
| AGQSAAGAAPGGGVDTTR                  | 1443.5             | 2            | 4.6853 | 0.5098 |
| AGQSSLGGGHVSR                       | 1342.4             | 2            | 3.635  | 0.4761 |
| AGQSVIGLQMGTNK                      | 1404.6             | 2            | 4.8755 | 0.4018 |
| AGQTQPNPGILPIQPALTPR                | 2070.4             | 2            | 2.9929 | 0.2804 |
| AGQTTYSGVIDCFR                      | 1518.7             | 2            | 3.3174 | 0.2528 |
| AGQVFLEELGNHK                       | 1442.6             | 2            | 4.0127 | 0.2707 |
| AGRDIFAQR                           | 1034.2             | 2            | 2.6527 | 0.1167 |
| AGREQTGLEAYALGLDTK                  | 1894.1             | 3            | 3.8408 | 0.1659 |
| AGRPHHDLPVILVGNK                    | 1724.0             | 2            | 4.1367 | 0.3402 |
| AGRSEAVVEYVFSGSR                    | 1714.9             | 2            | 4.5206 | 0.4161 |
| AGRVLDLVDESGYVSGYK                  | 1816.0             | 2            | 3.3821 | 0.2274 |
| AGSGSQVPTEPK                        | 1158.2             | 2            | 3.2828 | 0.267  |
| AGSMKDPLLDHGDGDFIR                  | 1888.1             | 3            | 4.4686 | 0.3667 |
| AGSRYEDFSNLGTTHLLR                  | 2038.2             | 3            | 5.6364 | 0.4483 |
| AGSSTPGDAPPAVAEVQGR                 | 1767.9             | 2            | 4.0089 | 0.4671 |
| AGTEALPDGLSVEDILNLLGMESAAANQK       | 2858.2             | 2            | 5.7803 | 0.4587 |

| Peptide Sequence               | Peptide mass (m/z) | Charge State | Xcorr  | DelCn2 |
|--------------------------------|--------------------|--------------|--------|--------|
| AGTEEAIVYSDIDLKK               | 1752.9             | 2            | 5.0699 | 0.3792 |
| AGTFQAFEQFGQQLLAHGHYASPEIK     | 2877.2             | 3            | 5.1919 | 0.4658 |
| AGTGVDNVDLEAATR                | 1489.6             | 2            | 4.5547 | 0.4564 |
| AGTGVDNVDLEAATR                | 1617.7             | 2            | 4.0525 | 0.3946 |
| AGTLSITEFADMLSGNAGGFR          | 2116.3             | 2            | 5.6894 | 0.4994 |
| AGTLTVEELGATLTSLLAQAQAQAR      | 2514.8             | 3            | 5.7839 | 0.4159 |
| AGTQIENIEEDFRDGLK              | 1936.1             | 2            | 4.2627 | 0.3788 |
| AGTQIENIEEDFRDGLKMLLLEVISGER   | 3290.7             | 3            | 4.1983 | 0.1304 |
| AGVAPLQVK                      | 883.1              | 2            | 2.5345 | 0.1091 |
| AGVDPLVPLR                     | 1037.2             | 2            | 3.1425 | 0.2926 |
| AGVDTSPDTQK                    | 1119.2             | 2            | 3.1568 | 0.2457 |
| AGVDTSPDTQKILVDSR              | 1803.0             | 3            | 3.4307 | 0.252  |
| AGVEAMSK                       | 792.9              | 1            | 2.1162 | 0.1492 |
| AGVENGKPTHFTVYTK               | 1749.9             | 2            | 4.1252 | 0.3643 |
| AGVHIKPLLSK                    | 1276.6             | 3            | 4.4369 | 0.258  |
| AGVIFPVGR                      | 916.1              | 1            | 2.6058 | 0.1894 |
| AGVIGLTQTAAR                   | 1158.3             | 2            | 4.0972 | 0.3831 |
| AGVKDTENR                      | 990.1              | 2            | 2.5412 | 0.1592 |
| AGVLADDHLIEVNGENVEDASHEEVVEK   | 3019.2             | 3            | 6.4866 | 0.3148 |
| AGVLAGHDNR                     | 1010.1             | 2            | 2.9509 | 0.2305 |
| AGVLAHLEEER                    | 1224.3             | 2            | 3.6404 | 0.4287 |
| AGVLAHLEEERDLK                 | 1580.8             | 2            | 3.8274 | 0.3112 |
| AGVMALANLLQIQR                 | 1498.8             | 2            | 3.8298 | 0.1618 |
| AGVNTVTTLVENK                  | 1346.5             | 2            | 3.1301 | 0.2221 |
| AGVPMEVMGLMLGEFVDDYTVR         | 2430.8             | 2            | 4.8746 | 0.4729 |
| AGVSISVVHGNLSEEA               | 1768.9             | 2            | 3.8332 | 0.4028 |
| AGVSSQPVSLADR                  | 1287.4             | 2            | 3.2503 | 0.2845 |
| AGVVGPELHEQLLSAEK              | 1778.0             | 2            | 4.8162 | 0.455  |
| AGVVTPGITEDQLWR                | 1642.8             | 2            | 3.5539 | 0.3589 |
| AGYIPLQGPGLTTTESR              | 1875.1             | 2            | 4.5143 | 0.3974 |
| AGYQDMPEYENFKHLLQAPLDDAQEILQAR | 3505.9             | 3            | 4.1302 | 0.2847 |
| AGYTDKVVIGMDVAASEFFR           | 2177.5             | 2            | 6.1072 | 0.5689 |
| AGYVDFENGQWATDDIPDDLNSIR       | 2712.8             | 3            | 5.3242 | 0.4132 |
| AHAAIRENPVYEK                  | 1498.7             | 2            | 3.2358 | 0.3474 |
| AHAHLDTGR                      | 978.0              | 2            | 2.6204 | 0.222  |
| AHATGAGPAGR                    | 966.0              | 2            | 2.736  | 0.2709 |



| Peptide Sequence                     | Peptide mass (m/z) | Charge State | Xcorr  | DelCn2 |
|--------------------------------------|--------------------|--------------|--------|--------|
| AHATTSNTVSK                          | 1117.2             | 2            | 2.9412 | 0.4913 |
| AHAVEGQVEDVVG NLR                    | 1693.8             | 2            | 3.9436 | 0.4509 |
| AHDERSEASGPQLLPVR                    | 1863.0             | 3            | 3.3371 | 0.2687 |
| AHDGGIYAIWSPDSTHLLSASGDK             | 2586.8             | 3            | 5.078  | 0.4183 |
| AHDGGIYAIWSPDSTHLLSASGDKTSK          | 2903.1             | 3            | 5.4476 | 0.4783 |
| AHDILHLVELAAQYR                      | 1750.0             | 2            | 4.8091 | 0.43   |
| AHEAQDAGYR                           | 1118.1             | 2            | 2.9807 | 0.2502 |
| AHEEQLKEAQAVPATLPELEATKASLKK         | 3032.4             | 3            | 5.2212 | 0.4069 |
| AHEKEFGSVNGDNKPIWMHAEER              | 2682.9             | 3            | 3.2128 | 0.1156 |
| AHELKEHNGHITGIDWAPK                  | 2154.4             | 3            | 3.3603 | 0.2096 |
| AHEQALAE LTKR                        | 1367.5             | 2            | 3.6886 | 0.3121 |
| AHESVVK                              | 769.9              | 1            | 1.8241 | 0.1237 |
| AHESVVKSEDFSLPAYMDR                  | 2182.4             | 2            | 5.5097 | 0.5072 |
| AHESVVKSEDFSLPAYMDRR                 | 2338.6             | 3            | 4.1411 | 0.3663 |
| AHFGLPSVEAEDKEGKPPISVK               | 2336.6             | 3            | 3.9509 | 0.2524 |
| AHFKELVNAVATVR                       | 1555.8             | 2            | 2.4385 | 0.303  |
| AHFLDADPGFVHSDGTISHHDMYDYLHLSR       | 3455.7             | 3            | 4.5299 | 0.2981 |
| AHFMHHYENF                           | 1333.5             | 2            | 2.9748 | 0.1901 |
| AHFNLDSEGVLSLDRVESVFETLVEDSAEEESTLTK | 3998.3             | 3            | 6.1165 | 0.4829 |
| AHFPLDVQWNDLDYMSDR                   | 2223.4             | 2            | 5.2569 | 0.4588 |
| AHFQNFNGVTDFIK                       | 1735.9             | 2            | 2.5046 | 0.1822 |
| AHFSISNSAEDPFIAIHAESKL               | 2385.6             | 3            | 3.7257 | 0.3657 |
| AHFSPSNIILDFPAAGSAAR                 | 2043.3             | 3            | 3.3694 | 0.1455 |
| AHGELHEQFK                           | 1196.3             | 2            | 3.0606 | 0.3061 |
| AHGFTFTR                             | 937.0              | 1            | 1.7464 | 0.2385 |
| AHGGYSVFAGVGER                       | 1407.5             | 2            | 4.4921 | 0.5541 |
| AHGLEVEPSALEQQFR                     | 1740.9             | 3            | 5.2424 | 0.394  |
| AHGLLAEENR                           | 1110.2             | 2            | 3.1728 | 0.337  |
| AHGLLAEENRGLGER                      | 1622.8             | 2            | 3.1036 | 0.3467 |
| AHGNVQDR                             | 896.9              | 1            | 1.6185 | 0.1094 |
| AHGPGLEGGLVGKPAEFTIDTK               | 2195.5             | 2            | 6.1936 | 0.5293 |
| AHGSLKP                              | 709.8              | 1            | 1.6543 | 0.1179 |
| AHGTHPAISTLAR                        | 1332.5             | 2            | 2.9552 | 0.4346 |
| AHGVDK                               | 626.7              | 1            | 1.6955 | 0.1917 |
| AHIKFPIDYPYSPPTFR                    | 2050.3             | 3            | 4.3455 | 0.3857 |
| AHIVDFHFQAADGIQEQQR                  | 2211.4             | 3            | 3.9511 | 0.2488 |

| Peptide Sequence                      | Peptide mass (m/z) | Charge State | Xcorr  | DelCn2 |
|---------------------------------------|--------------------|--------------|--------|--------|
| AHIVDFHQAADGIQEQQRQEAGK               | 2853.1             | 3            | 4.0397 | 0.2863 |
| AHKETVEQLQAK                          | 1382.5             | 2            | 3.5447 | 0.3558 |
| AHLEKESIAQR                           | 1282.4             | 2            | 2.5312 | 0.1606 |
| AHLEKLEVDLNK                          | 1409.6             | 2            | 2.8733 | 0.3001 |
| AHLESLVASRSPQPLAETPIPSLPEFPR          | 3138.6             | 3            | 7.0038 | 0.5503 |
| AHLGTALK                              | 811.0              | 1            | 1.9303 | 0.186  |
| AHLLAAALGPAGER                        | 1347.5             | 2            | 2.5347 | 0.2009 |
| AHLLADMAHISGLVAAK                     | 1719.0             | 2            | 5.3638 | 0.4942 |
| AHLLDNTERLER                          | 1467.6             | 2            | 2.4869 | 0.1542 |
| AHLMEIQVNGGTVAEK                      | 1697.9             | 2            | 5.8565 | 0.5018 |
| AHLVAVFNEYQR                          | 1447.6             | 2            | 3.9273 | 0.4389 |
| AHLVEVQGLQVR                          | 1349.6             | 2            | 2.8915 | 0.2266 |
| AHMGMFTELAILYSK                       | 1713.1             | 2            | 3.3561 | 0.1208 |
| AHPQGLVLVTDALPALGLGNR                 | 2170.5             | 3            | 4.2881 | 0.3229 |
| AHQAHAVVAEEVAALTGELER                 | 2202.4             | 2            | 3.7257 | 0.3603 |
| AHQANQLYPPFAISLIESVR                  | 2158.4             | 2            | 4.6986 | 0.4981 |
| AHQEKPNFIK                            | 1325.5             | 2            | 2.939  | 0.2455 |
| AHQITDESLESTRR                        | 1643.7             | 2            | 3.425  | 0.2691 |
| AHQVVEDGYEFFAK                        | 1640.8             | 2            | 4.3362 | 0.4354 |
| AHQVVEDGYEFFAKR                       | 1797.0             | 2            | 4.8975 | 0.4433 |
| AHSDGGDGVVSQVK                        | 1356.4             | 2            | 3.6507 | 0.389  |
| AHSGAQGLLAAQK                         | 1252.4             | 2            | 4.0521 | 0.4517 |
| AHSGSHSGGGLAK                         | 1295.3             | 2            | 3.9178 | 0.5336 |
| AHSIKDMENLQLVR                        | 1756.0             | 2            | 3.2818 | 0.3097 |
| AHSIQIMKVEEIAASK                      | 1756.1             | 2            | 4.8224 | 0.4457 |
| AHSQTDRENLR                           | 1327.4             | 2            | 3.2023 | 0.1569 |
| AHSSAGQQVAR                           | 1112.2             | 2            | 3.3914 | 0.2488 |
| AHSSMAEVNLPQKAGGFLMK                  | 2117.5             | 2            | 3.0335 | 0.1138 |
| AHSSMVGVNLPQK                         | 1368.6             | 2            | 4.3813 | 0.4228 |
| AHSSPASLQLGAVSPGTLTPTGVVSGPAATPTAQHLR | 3536.9             | 3            | 7.5156 | 0.4814 |
| AHSTGEQPPQLSLATR                      | 1693.8             | 2            | 4.2713 | 0.4929 |
| AHSTMTGSGVDAR                         | 1290.4             | 2            | 3.1478 | 0.3499 |
| AHTDFFEAFK                            | 1213.3             | 2            | 2.86   | 0.3696 |
| AHTKDEAEQLAGK                         | 1398.5             | 2            | 3.0594 | 0.3533 |
| AHTSSTQLQEELEK                        | 1601.7             | 2            | 3.1013 | 0.2919 |
| AHTSSTQLQEELEKVANQIKKEEEEKQVVEAEK     | 3684.0             | 3            | 5.3843 | 0.49   |

| Peptide Sequence                    | Peptide mass (m/z) | Charge State | Xcorr  | DelCn2 |
|-------------------------------------|--------------------|--------------|--------|--------|
| AHVDEFKSVSK                         | 1247.4             | 2            | 3.5224 | 0.4064 |
| AHVIVMAATNRPNSIDPALR                | 2147.5             | 3            | 3.6285 | 0.3824 |
| AHVIVMAATNRPNSIDPALRR               | 2303.7             | 3            | 3.9397 | 0.3282 |
| AHVLAASVEQATENFLEK                  | 1958.2             | 2            | 5.1386 | 0.2895 |
| AHVLAASVEQATENFLEKGDK               | 2258.5             | 3            | 3.5633 | 0.3952 |
| AHVLAASVEQATENFLEKGDKIAK            | 2570.9             | 3            | 4.6499 | 0.4491 |
| AHVLHFGK                            | 909.1              | 2            | 2.6257 | 0.2107 |
| AHVQEV AQHNLK                       | 1374.5             | 3            | 4.2434 | 0.393  |
| AHVTHPELK                           | 1032.2             | 2            | 2.8105 | 0.2984 |
| AIAALISEKLETLR                      | 1528.8             | 2            | 4.3481 | 0.3637 |
| AIADTGANVVVTGGK                     | 1373.5             | 2            | 4.3833 | 0.466  |
| AIAELGIYPAVDPLDSTSR                 | 1989.2             | 3            | 5.0714 | 0.5026 |
| AIAELGIYPAVDPLDSTSRIMDPNIVGSEHYDVAR | 3787.2             | 3            | 3.7526 | 0.1096 |
| AIAGDEHKR                           | 997.1              | 2            | 2.6382 | 0.2469 |
| AIAGGDEKGAQAQVAVLAQHR               | 2034.3             | 3            | 4.4093 | 0.3352 |
| AIAGVINQPYNYEAGPDAVLGR              | 2452.7             | 3            | 6.0265 | 0.5387 |
| AIAHYEQSADYKGEESNSSANK              | 2563.6             | 3            | 5.4932 | 0.428  |
| AIAIPVDLDSQVNNLFLK                  | 1971.3             | 2            | 3.291  | 0.3795 |
| AIANECQANFISIK                      | 1522.8             | 2            | 3.441  | 0.3202 |
| AIAQSQSVQESLESLLQSIGVEQNLEGK        | 3116.4             | 3            | 5.5021 | 0.3218 |
| AIALMSDEVFHDIAIK                    | 1925.2             | 2            | 4.8111 | 0.4829 |
| AIDALREFNEEGALSVLQQFK               | 2379.7             | 2            | 3.3212 | 0.2093 |
| AIDGLDRNLHYFNDSFASHPNYPYSDEY        | 3409.5             | 3            | 4.7425 | 0.3922 |
| AIDIYEQVGTAMDSPLLK                  | 2079.4             | 2            | 3.6841 | 0.3443 |
| AIDLFTDAIK                          | 1107.3             | 2            | 3.1422 | 0.1944 |
| AIDLFTDAIKLNPR                      | 1587.8             | 2            | 4.7031 | 0.4428 |
| AIDTIYQTTDFSGIR                     | 1701.9             | 2            | 3.3036 | 0.4392 |
| AIDTTQLFSLPK                        | 1334.5             | 2            | 3.8556 | 0.343  |
| AIDTTQLFSLPKDFWEQEV R               | 2424.7             | 3            | 5.0383 | 0.4825 |
| AIEALHGHEL RPGR                     | 1556.8             | 3            | 3.2522 | 0.3028 |
| AIEALKEFNEDGALAVLQQFK               | 2335.6             | 2            | 5.8626 | 0.5183 |
| AIEALKEFNEDGALAVLQQFKDSDL SHVQNK    | 3459.8             | 3            | 7.5059 | 0.4307 |
| AIEAVHNTAMR                         | 1213.4             | 2            | 3.213  | 0.3051 |
| AIEEFESSLKEAK                       | 1481.6             | 2            | 3.0598 | 0.2803 |
| AIEENNNFSK                          | 1166.2             | 2            | 2.9344 | 0.2454 |
| AIEGFNQSSHQK                        | 1346.4             | 2            | 3.1955 | 0.1377 |

| Peptide Sequence                   | Peptide mass (m/z) | Charge State | Xcorr  | DelCn2 |
|------------------------------------|--------------------|--------------|--------|--------|
| AIEINPDSAQPYPK                     | 1446.6             | 2            | 3.2523 | 0.2856 |
| AIEKLAVEALSSLDGDLAGR               | 2029.3             | 2            | 5.8742 | 0.5014 |
| AIELFSVGQGPAAK                     | 1317.5             | 2            | 4.0189 | 0.2859 |
| AIEMLGCELGSK                       | 1205.4             | 2            | 3.9142 | 0.3767 |
| AIEMLGCELGSKIPVHPNDHVNK            | 2456.8             | 3            | 5.6374 | 0.4353 |
| AIENELLAR                          | 1029.2             | 2            | 3.2795 | 0.1937 |
| AIENIDTLTNLESLFLGK                 | 1992.3             | 2            | 6.2222 | 0.5458 |
| AIEPNDYTGKVSEEIEDIIKKGETQTL        | 3022.3             | 3            | 3.3463 | 0.1341 |
| AIEPPLDAVIEAEHTLRELDALDANDELTPPLGR | 3696.1             | 3            | 3.439  | 0.1982 |
| AIEPQKEEADENYNSVNTR                | 2208.3             | 3            | 3.7825 | 0.2272 |
| AIEQADLLQEEDESPR                   | 1843.9             | 2            | 5.2442 | 0.3708 |
| AIEQFQTENGVLLPSLQSLPFLDLHGTPR      | 3293.7             | 3            | 3.3458 | 0.2546 |
| AIETTDIISR                         | 1119.3             | 2            | 3.1222 | 0.2532 |
| AIFDTPDEDPNYPNPLPEERPGGFAWGEGQR    | 3376.5             | 3            | 5.0274 | 0.4242 |
| AIFLADGKVFTTGFSR                   | 1731.0             | 2            | 4.4531 | 0.3559 |
| AIFLADGNVFTTGFSR                   | 1716.9             | 2            | 4.3346 | 0.4309 |
| AIFTGHSAVVEDVAWHLLHESLFGSVADDQK    | 3380.7             | 3            | 3.8346 | 0.37   |
| AIGAVPLIQGEYMIPCEK                 | 1933.3             | 2            | 4.2049 | 0.3833 |
| AIGDHFYKR                          | 1107.2             | 2            | 2.8892 | 0.2869 |
| AIGGEFSDTNAAVEGTPLPK               | 1975.1             | 2            | 4.7998 | 0.3035 |
| AIGHVIEEGVK                        | 1209.4             | 2            | 2.4033 | 0.1704 |
| AIGIEPSLATYHHIR                    | 1792.1             | 2            | 3.0763 | 0.2822 |
| AIGISNFNHLQVEMILNKPGLK             | 2437.9             | 3            | 4.1895 | 0.2723 |
| AIGKDNFTAIPEGTNGVEER               | 2119.3             | 2            | 5.8988 | 0.4542 |
| AIGLLDQDVYGPSVPK                   | 1643.9             | 2            | 3.8267 | 0.3667 |
| AIGPHDVLATLLNNLK                   | 1690.0             | 2            | 5.0576 | 0.3803 |
| AIGPSQHTIR                         | 1181.3             | 2            | 3.3161 | 0.3376 |
| AIGSASEGAQSSLQEVYHK                | 1963.1             | 2            | 5.4327 | 0.4598 |
| AIGSTSKPQESPK                      | 1330.5             | 2            | 2.9582 | 0.2375 |
| AIGTDEDLAHSSIR                     | 1485.6             | 2            | 4.0891 | 0.3431 |
| AIGTEPDTDVLSEIMNSFAK               | 2139.4             | 2            | 3.3364 | 0.3162 |
| AIHDKDYVK                          | 1089.2             | 2            | 2.4114 | 0.1946 |
| AIHDVKATDLGLGK                     | 1438.7             | 2            | 3.6319 | 0.3243 |
| AIHEFLAAQKK                        | 1256.5             | 2            | 2.419  | 0.1571 |
| AIHKETGQIVAIK                      | 1408.7             | 2            | 2.5885 | 0.2483 |
| AIHKIDIPSFWDWPIAPFPR               | 2221.6             | 3            | 5.2445 | 0.4259 |

| Peptide Sequence                      | Peptide mass (m/z) | Charge State | Xcorr  | DelCn2 |
|---------------------------------------|--------------------|--------------|--------|--------|
| AIHNKVNIVPIAK                         | 1516.9             | 2            | 3.1825 | 0.1095 |
| AIIEEYLHLNDMK                         | 1589.8             | 2            | 2.7573 | 0.1245 |
| AIIESDQEQGR                           | 1246.3             | 2            | 3.3713 | 0.2731 |
| AIIESDQEQGRK                          | 1374.5             | 2            | 3.4213 | 0.2398 |
| AIIFVVPVQLK                           | 1338.7             | 2            | 3.6776 | 0.3688 |
| AIKPQYVDQIPK                          | 1513.8             | 2            | 3.1825 | 0.2722 |
| AILNTPHNPLGK                          | 1388.6             | 2            | 3.4716 | 0.3318 |
| AIIPSHLAYGKR                          | 1326.6             | 2            | 2.841  | 0.3149 |
| AISNKDILATNGVIHYIDELLIPDSAK           | 3038.5             | 3            | 4.0351 | 0.2465 |
| AIKEGDLSTK                            | 1062.2             | 2            | 2.5739 | 0.2032 |
| AIKEGDLSTKYDAPFVFAEVNADVVDWIQQDDGSVHK | 4109.5             | 3            | 6.0183 | 0.3668 |
| AIKEKEYEIER                           | 1408.6             | 2            | 2.7563 | 0.2109 |
| AIKELEEWYAR                           | 1408.6             | 3            | 3.8026 | 0.2758 |
| AIKELEEWYARQDEQLQK                    | 2278.5             | 2            | 4.267  | 0.3149 |
| AIKELGDHVTNLR                         | 1466.7             | 2            | 4.0897 | 0.3982 |
| AIKELGDHVTNLRK                        | 1594.8             | 2            | 4.4965 | 0.388  |
| AIKLTVNDFVR                           | 1276.5             | 2            | 2.5671 | 0.2189 |
| AIKQVYEEEYGSSLEDDVVGDTSGYYQR          | 3202.3             | 3            | 7.0046 | 0.6147 |
| AIKVEQATKPSFER                        | 1604.8             | 2            | 3.9523 | 0.3674 |
| AIKVEQATKPSFESGR                      | 1749.0             | 3            | 5.1626 | 0.4867 |
| AIKVEQATKPSFESGRR                     | 1905.1             | 2            | 2.9605 | 0.2191 |
| AILIFNNHGKPR                          | 1380.6             | 2            | 3.2608 | 0.2702 |
| AILILDNDGDRLFAK                       | 1674.9             | 2            | 4.1995 | 0.3853 |
| AILNYIASK                             | 993.2              | 2            | 3.2146 | 0.3352 |
| AILNYIASKYNLYGK                       | 1732.0             | 2            | 4.1022 | 0.4071 |
| AILQEVLDADLSNEAFPSTHK                 | 2446.7             | 2            | 5.1422 | 0.4532 |
| AILTESENKLRDLQQAETYSR                 | 2508.7             | 3            | 3.3518 | 0.2131 |
| AILVDLEPGTMDSVR                       | 1616.9             | 2            | 4.9038 | 0.4887 |
| AIMAQLPQEQK                           | 1257.5             | 2            | 3.4392 | 0.1211 |
| AIMEKLEMSKFQPTLLTLPR                  | 2347.9             | 3            | 3.2857 | 0.1805 |
| AIMKDPDDHTVCHLLFANQTEK                | 2527.9             | 3            | 4.2319 | 0.3098 |
| AIMTYVSSFYHAFSGAQK                    | 2009.3             | 2            | 5.4628 | 0.5314 |
| AIMTYVSSFYHAFSGAQKAETAANR             | 2723.0             | 3            | 3.7582 | 0.3309 |
| AINEAYKEDYHK                          | 1481.6             | 2            | 3.5703 | 0.3055 |
| AINEAYKEDYHKSLEDALSSDTSGHFR           | 3085.2             | 3            | 7.0799 | 0.4966 |
| AINEAYKEDYHKSLEDALSSDTSGHFRR          | 3241.4             | 3            | 4.4737 | 0.2854 |

| Peptide Sequence                        | Peptide mass (m/z) | Charge State | Xcorr  | DelCn2 |
|-----------------------------------------|--------------------|--------------|--------|--------|
| AINFNFGYAK                              | 1145.3             | 2            | 3.1087 | 0.3094 |
| AINGPTSASGDDISK                         | 1433.5             | 2            | 2.7238 | 0.2074 |
| AINIADLPR                               | 1112.3             | 2            | 3.3077 | 0.2733 |
| AINLQMFHK                               | 1102.3             | 2            | 2.9532 | 0.1664 |
| AINQGGLTSVAVR                           | 1286.5             | 2            | 3.6809 | 0.3782 |
| AINQQTGAFVEISR                          | 1534.7             | 2            | 4.1692 | 0.4086 |
| AINTLNGLR                               | 972.1              | 2            | 2.6716 | 0.2442 |
| AINTQEAPVKEK                            | 1328.5             | 2            | 2.9228 | 0.2272 |
| AINTQEVAVKEK                            | 1330.5             | 2            | 2.7698 | 0.2858 |
| AINVQEEKIAALQAFADQLIAAGHYAK             | 2885.3             | 3            | 3.9373 | 0.2934 |
| AIPDLTAPVAAVQAASNLVR                    | 2077.4             | 2            | 5.7322 | 0.6354 |
| AIPELTKLLNDEDQVVVNK                     | 2139.4             | 2            | 3.6627 | 0.2151 |
| AIPFLGNSLKPDSLR                         | 1628.9             | 2            | 3.816  | 0.3819 |
| AIPQLQGYLR                              | 1159.4             | 2            | 2.6245 | 0.2707 |
| AIPTVNHSGTFSPQAPVPTTVPVVDVR             | 2788.2             | 3            | 4.8032 | 0.3397 |
| AIPVAQDLNAPSDWDSR                       | 1856.0             | 2            | 5.0865 | 0.5049 |
| AIQAYGMKPHDIFEANDLFENGNMTQVQTTLVALAGLAK | 4222.8             | 3            | 5.347  | 0.4191 |
| AIQDGTIVLMGTYYDDGATK                    | 1970.2             | 2            | 3.8468 | 0.1546 |
| AIQDGTIVLMGTYYDDGATKLNDEARR             | 2825.1             | 3            | 4.2714 | 0.3715 |
| AIQDHLLLEVEQSKDQMEK                     | 2142.4             | 3            | 3.416  | 0.2209 |
| AIQDMFPNMDQEVIR                         | 1808.1             | 2            | 3.1126 | 0.199  |
| AIQGGTSHHLGQNFSK                        | 1682.8             | 2            | 4.3057 | 0.4415 |
| AIQIMYQNLQQDGLEK                        | 1893.2             | 2            | 5.7643 | 0.4442 |
| AIQINPAFADAHSNLAHKSIGNIPEAIASYSR        | 3493.8             | 3            | 5.1024 | 0.3849 |
| AIQTLGYFPVGDGDFPHQK                     | 2091.3             | 2            | 4.0363 | 0.4116 |
| AIRDEAIYHFR                             | 1391.6             | 2            | 2.8649 | 0.2703 |
| AIRDGVIEASINHEK                         | 1652.8             | 2            | 4.4378 | 0.3261 |
| AIRDGVIEASINHEKGYVQSK                   | 2315.6             | 2            | 5.5174 | 0.4859 |
| AIRDYQGPKLKEHEVTIFVR                    | 2272.6             | 2            | 5.0068 | 0.3781 |
| AIRLELQGPR                              | 1153.4             | 2            | 2.9936 | 0.143  |
| AISAHFDDSSASSLK                         | 1536.6             | 2            | 3.3881 | 0.3171 |
| AISEAKLEEYTGMMK                         | 1803.1             | 2            | 4.8259 | 0.3797 |
| AISEQTGK                                | 833.9              | 2            | 2.6457 | 0.1988 |
| AISEQTGKELLYK                           | 1480.7             | 2            | 3.7028 | 0.3273 |
| AISESGVALTSVLVK                         | 1474.7             | 2            | 5.1173 | 0.4247 |
| AISGVHTVR                               | 940.1              | 2            | 2.832  | 0.2952 |

| Peptide Sequence                  | Peptide mass (m/z) | Charge State | Xcorr  | DelCn2 |
|-----------------------------------|--------------------|--------------|--------|--------|
| AISHEHSPSDLEAHFVPLVK              | 2214.5             | 3            | 5.7661 | 0.4721 |
| AISHEHSPSDLEAHFVPLVKR             | 2370.7             | 3            | 6.8471 | 0.5125 |
| AISKDHLYGTLDPNTR                  | 1802.0             | 2            | 4.5463 | 0.4481 |
| AISPDKDNFYFDVKDDDFDFTMGHVIR       | 3151.5             | 3            | 4.2441 | 0.3291 |
| AISQGHQAFLLEGDSSSR                | 1904.0             | 2            | 5.7015 | 0.4815 |
| AISQSGVALSPWVIQK                  | 1685.0             | 2            | 4.548  | 0.3082 |
| AISYHLVQKPFSLTK                   | 1733.0             | 2            | 3.1938 | 0.1601 |
| AITDGQAGFGNDTLSKVPGISSIEQGMTGLK   | 3094.4             | 3            | 3.7134 | 0.2692 |
| AITEKEKIEK                        | 1189.4             | 2            | 3.0586 | 0.148  |
| AITEKEKIEKER                      | 1474.7             | 2            | 3.3593 | 0.2231 |
| AITGASLADIMAK                     | 1262.5             | 2            | 4.4213 | 0.4379 |
| AITGASLADIMAKR                    | 1418.7             | 2            | 2.9439 | 0.2356 |
| AITGFDDPFSGK                      | 1255.4             | 2            | 3.53   | 0.3312 |
| AITHLNNFMFGQK                     | 1635.9             | 2            | 4.7132 | 0.3894 |
| AITIAGIPQSIIECVK                  | 1657.0             | 2            | 3.0226 | 0.1105 |
| AITIAGVPQSVTECVK                  | 1616.9             | 2            | 3.481  | 0.3045 |
| AITIAGVPQSVTECVKQICLVMLETLSQSPQGR | 3502.1             | 3            | 5.4929 | 0.4508 |
| AITISSALQAGTVWVNCYGVVSAQCPCFGGFK  | 3176.7             | 3            | 3.9935 | 0.3192 |
| AITQEQCEAR                        | 1149.3             | 2            | 3.0773 | 0.3309 |
| AITSAYYR                          | 945.1              | 1            | 1.9831 | 0.1024 |
| AITVFSPDGHLFQVEYAQEAVK            | 2450.7             | 3            | 5.0642 | 0.3984 |
| AITVFSPDGHLFQVEYAQEAVKK           | 2578.9             | 2            | 4.6692 | 0.4609 |
| AIVAIENPADVSVISSR                 | 1742.0             | 2            | 5.4808 | 0.5064 |
| AIVEDHSLVAEEK                     | 1440.6             | 2            | 3.6468 | 0.3791 |
| AIVHDNKDGTAVTYIPDKTGR             | 2435.7             | 3            | 5.1028 | 0.4071 |
| AIWNVINWENVTER                    | 1744.9             | 2            | 4.9511 | 0.4933 |
| AIYDIERPDLITYEPFYTSYDDKQER        | 3299.5             | 3            | 5.6594 | 0.4419 |
| AIYFDGDFGQIVR                     | 1501.7             | 2            | 4.1685 | 0.4912 |
| AIYHDLEQSIR                       | 1345.5             | 3            | 3.7626 | 0.2523 |
| AIYKGGSEAGP                       | 1147.3             | 2            | 3.0187 | 0.3041 |
| AKADA EYAAHK                      | 1338.5             | 2            | 3.1514 | 0.322  |
| AKADSAYHPSCTCK                    | 1482.7             | 2            | 2.5837 | 0.1041 |
| AKALDQSDNDMSAVYR                  | 1784.9             | 2            | 3.8455 | 0.4173 |
| AKAQALVQYLEEPLTQVAAS              | 2131.4             | 2            | 3.387  | 0.267  |
| AKAQELIQATNQILSHR                 | 1922.2             | 3            | 4.2649 | 0.2339 |
| AKAVSEKEVDSGNDIYGNPIKR            | 2391.6             | 3            | 4.5076 | 0.2545 |

| Peptide Sequence                 | Peptide mass (m/z) | Charge State | Xcorr  | DelCn2 |
|----------------------------------|--------------------|--------------|--------|--------|
| AKDAELAWIDGVLDMR                 | 1804.1             | 2            | 3.8025 | 0.4209 |
| AKDANNGNLQLR                     | 1314.4             | 2            | 3.3852 | 0.2511 |
| AKDDQTPLHISAR                    | 1452.6             | 2            | 3.383  | 0.1829 |
| AKDEQSAVSMLKK                    | 1435.7             | 3            | 4.1152 | 0.2692 |
| AKDFVFSLLGLVHR                   | 1602.9             | 2            | 3.8091 | 0.3877 |
| AKDGLVVFVGK                      | 1034.2             | 2            | 2.6064 | 0.2233 |
| AKDHGLEVLGLVR                    | 1407.6             | 2            | 3.1757 | 0.312  |
| AKDINQEVYNFLATAGAK               | 1954.2             | 2            | 5.8463 | 0.5162 |
| AKDIPIPNLPLDFPSPPELPLMELSEDILK   | 3343.9             | 3            | 3.4672 | 0.2177 |
| AKDLEEEELER                      | 1232.3             | 2            | 3.1711 | 0.2561 |
| AKDLIVTPATILK                    | 1383.7             | 2            | 3.4725 | 0.1959 |
| AKDLVELDPEVEGKPSATEMIWAVLAAFNK   | 3374.8             | 3            | 3.9539 | 0.2251 |
| AKDLVELDPEVEGKPSATEMIWAVLAAFNKKS | 3461.9             | 3            | 4.9792 | 0.3625 |
| AKDLYSALIK                       | 1122.3             | 2            | 2.718  | 0.1281 |
| AKDMHLVK                         | 942.2              | 2            | 2.7301 | 0.2123 |
| AKDPFAHLPK                       | 1124.3             | 2            | 2.6956 | 0.1546 |
| AKDQDILDLVGVLDHPETLLR            | 2361.7             | 3            | 5.1566 | 0.3772 |
| AKDREIATLQEQLMTSEATVHSLQATVHQR   | 3393.8             | 3            | 5.1178 | 0.3326 |
| AKDYPAHTEEDKQIQTEAAQLLTSFSEK     | 3180.4             | 3            | 6.137  | 0.4325 |
| AKDYPAHTEEDKQIQTEAAQLLTSFSEKN    | 3294.5             | 3            | 6.5398 | 0.4703 |
| AKEAAALGSR                       | 974.1              | 2            | 2.9173 | 0.1667 |
| AKEAAEQDVEK                      | 1218.3             | 2            | 3.9069 | 0.3261 |
| AKEAAEQDVEKK                     | 1346.5             | 2            | 4.1569 | 0.3158 |
| AKEAAEQDVEKKK                    | 1474.6             | 2            | 4.3749 | 0.3107 |
| AKEAEGGAATAGPSR                  | 1373.5             | 2            | 2.8539 | 0.3139 |
| AKEALELTDGLLSGSEER               | 2020.2             | 2            | 6.6377 | 0.5415 |
| AKEAQDDLK                        | 1117.2             | 2            | 3.4845 | 0.2067 |
| AKEDVLQKEVR                      | 1315.5             | 2            | 2.8601 | 0.2131 |
| AKEELERQAVDQIK                   | 1657.9             | 2            | 4.0133 | 0.2393 |
| AKEELERQAVDQIKSQEQLAAELAEYTAK    | 3291.6             | 3            | 6.1608 | 0.4495 |
| AKEEMSLSDLNSQDRVDHEEWEMVPR       | 3132.4             | 3            | 4.4289 | 0.2897 |
| AKEEQQDDTVYMGK                   | 1642.8             | 2            | 4.1708 | 0.3877 |
| AKEFTNVYIK                       | 1213.4             | 2            | 4.1135 | 0.2796 |
| AKEFTNVYIKNFGEEVDDESLKELFSQFGK   | 3513.9             | 3            | 5.5091 | 0.3236 |
| AKEIGADLVLQISKESPQEIAR           | 2396.7             | 3            | 5.8459 | 0.404  |
| AKEILQEEEDLAEIVQLVGK             | 2255.6             | 2            | 6.9172 | 0.4097 |



| Peptide Sequence                 | Peptide mass (m/z) | Charge State | Xcorr  | DelCn2 |
|----------------------------------|--------------------|--------------|--------|--------|
| AKEILTKESNVQEVK                  | 1745.0             | 2            | 4.172  | 0.3367 |
| AKEILTNEESR                      | 1290.4             | 2            | 3.1077 | 0.194  |
| AKEISNLNQLIEEFKK                 | 1905.2             | 2            | 5.3191 | 0.3159 |
| AKELLGQGLLLR                     | 1311.6             | 2            | 4.0358 | 0.2484 |
| AKEQIESLEHDLQASVDELQDVKEER       | 3040.2             | 3            | 4.9644 | 0.3316 |
| AKESLKELSLAGNELGDEGAR            | 2188.4             | 2            | 5.6117 | 0.4612 |
| AKETADAITK                       | 1048.2             | 2            | 2.9586 | 0.2006 |
| AKETADAITKEAK                    | 1376.5             | 2            | 4.4019 | 0.3462 |
| AKFDAELLEIKK                     | 1405.7             | 3            | 4.1899 | 0.3283 |
| AKFEELNMDLFR                     | 1513.7             | 3            | 4.7695 | 0.4521 |
| AKFYPEDVAEELIQDITQK              | 2238.5             | 2            | 5.9112 | 0.504  |
| AKFYPEDVAEELIQDITQKLFLLQVK       | 3114.6             | 3            | 5.1158 | 0.458  |
| AKFYPEDVSEELIQDITQR              | 2282.5             | 2            | 4.822  | 0.5087 |
| AKGDAKGDKAK                      | 1089.2             | 2            | 3.2054 | 0.1962 |
| AKGGEEPLPEGLFWLLVTGHIPTTEQVSWLSK | 3550.0             | 3            | 4.5311 | 0.1667 |
| AKGHSLSDGLLEEVQK                 | 1598.7             | 3            | 4.17   | 0.3449 |
| AKGHSLSDGLLEEVQKAEMK             | 2058.3             | 3            | 3.3976 | 0.2951 |
| AKGPVTIPYPLFQSHVEDLYVEGLPEGIPFR  | 3471.0             | 3            | 3.9988 | 0.3701 |
| AKGSETPGATPGSK                   | 1288.4             | 2            | 4.0566 | 0.3178 |
| AKHDELTYP                        | 1124.2             | 2            | 2.7899 | 0.2609 |
| AKHHAISAK                        | 963.1              | 2            | 2.6448 | 0.2211 |
| AKHLAEEYGER                      | 1303.4             | 2            | 2.8461 | 0.3019 |
| AKHSGDYFTLLR                     | 1408.6             | 3            | 3.5531 | 0.2178 |
| AKHVYSEAAR                       | 1132.3             | 2            | 2.7708 | 0.2802 |
| AKIAEQVASFQEEK                   | 1578.7             | 2            | 4.6635 | 0.3301 |
| AKIDDPTDSKPEDWDKPEHIPDPDAK       | 2961.1             | 3            | 5.6708 | 0.3499 |
| AKIEDEKKDEEKEDPK                 | 1932.1             | 2            | 4.5349 | 0.2741 |
| AKIEETITQAR                      | 1260.4             | 2            | 2.4769 | 0.1955 |
| AKIELLGSYDPQK                    | 1462.7             | 2            | 3.4097 | 0.163  |
| AKIIAEGANGPTTPEADKIFLER          | 2442.8             | 3            | 5.2848 | 0.3927 |
| AKKDDTDDEIAK                     | 1349.4             | 2            | 4.7476 | 0.2166 |
| AKKDDTDDEIAKYDGK                 | 1812.9             | 2            | 5.3283 | 0.5173 |
| AKKDDTDDEIAKYDGKWEVEEMKESK       | 3089.3             | 3            | 5.8735 | 0.3668 |
| AKKDLEEWNR                       | 1417.6             | 2            | 2.9192 | 0.1498 |
| AKKDNVAGVTLPVFEHYHEGTDSYELTGLAR  | 3419.7             | 3            | 7.2257 | 0.568  |
| AKKGEEALFTTR                     | 1351.5             | 2            | 3.4538 | 0.3549 |

| Peptide Sequence                    | Peptide mass (m/z) | Charge State | Xcorr  | DelCn2 |
|-------------------------------------|--------------------|--------------|--------|--------|
| AKKPAAATVTK                         | 1086.3             | 2            | 2.4351 | 0.2859 |
| AKKVEDMMK                           | 1080.3             | 2            | 2.6975 | 0.2419 |
| AKKYILGNPLTPGVTTQGPQIDKEQYDK        | 3003.4             | 3            | 4.6517 | 0.3185 |
| AKLAEQAERYDDMAAAMK                  | 2013.3             | 2            | 4.1899 | 0.4701 |
| AKLAEVLEAVMPHLDQTPNPLVSSVFHR        | 3100.6             | 3            | 4.9192 | 0.3177 |
| AKLDNNKELAFFANALEEVSITIEAGFMTK      | 3445.9             | 3            | 3.2998 | 0.1893 |
| AKLDSLQDIGMDHQALLK                  | 1997.3             | 2            | 5.1175 | 0.446  |
| AKLEAAIAEAEER                       | 1401.5             | 2            | 3.4855 | 0.3846 |
| AKLEAAIAEAEERGERLAK                 | 2013.3             | 2            | 6.1757 | 0.4521 |
| AKLEAAIAEAEERGERLAKDAR              | 2355.6             | 3            | 5.5255 | 0.41   |
| AKLEEAAILGSIGAR                     | 1428.7             | 2            | 3.5015 | 0.3182 |
| AKLEEHFK                            | 1002.1             | 2            | 2.7584 | 0.1731 |
| AKLEEHFKNQELR                       | 1642.8             | 2            | 4.1935 | 0.2219 |
| AKLEQLFQDEVAK                       | 1519.7             | 2            | 4.0818 | 0.3691 |
| AKLEQLFQDEVAKAQQLREEQQR             | 2787.1             | 3            | 3.4856 | 0.2051 |
| AKLGDSHDLQR                         | 1240.4             | 2            | 2.577  | 0.2051 |
| AKLHIDEMDSVPTVR                     | 1712.0             | 2            | 3.0117 | 0.3285 |
| AKLNWLSVDFNNWK                      | 1736.0             | 2            | 4.3747 | 0.3842 |
| AKLPLGLLLHPFR                       | 1475.8             | 3            | 3.4571 | 0.4143 |
| AKLQIELGK                           | 1000.2             | 2            | 2.5754 | 0.1185 |
| AKLSSDVLTLIK                        | 1401.7             | 2            | 3.0846 | 0.188  |
| AKLTISPDYAYGATGHPGIIPPHATLVFDVELLKE | 3849.4             | 3            | 5.0828 | 0.3526 |
| AKMDAEQDPNVQVDHLNLLK                | 2279.6             | 3            | 3.5114 | 0.1684 |
| AKNEILDEVISLSQVTPK                  | 1985.3             | 2            | 5.4881 | 0.4864 |
| AKNGHLAVVAPR                        | 1233.4             | 2            | 3.5335 | 0.4119 |
| AKNNTVTPGGKPNK                      | 1426.6             | 2            | 3.4624 | 0.2511 |
| AKPAEAPAAAAPK                       | 1193.4             | 2            | 3.0703 | 0.2357 |
| AKPAMPQDSVPSPR                      | 1481.7             | 2            | 3.4582 | 0.3839 |
| AKPDFKELTVSNNDINEAGVR               | 2318.5             | 2            | 5.6748 | 0.3407 |
| AKPDHDPNTR                          | 1151.2             | 2            | 2.4908 | 0.1555 |
| AKPKEADESLNFEEQILEAAK               | 2361.6             | 3            | 5.0532 | 0.3684 |
| AKPLLLQLPIGEAK                      | 1491.8             | 2            | 2.869  | 0.2321 |
| AKPVNSKPD SAYR                      | 1433.6             | 2            | 2.8182 | 0.2793 |
| AKPYEGSILEADCDILIPAASEK             | 2434.7             | 2            | 4.1933 | 0.2859 |
| AKQDFLKTSDSDLQLYKEQGEGQGDR          | 3073.2             | 2            | 2.5425 | 0.1182 |
| AKQDMAR                             | 820.0              | 1            | 2.0287 | 0.1743 |

| Peptide Sequence             | Peptide mass (m/z) | Charge State | Xcorr  | DelCn2 |
|------------------------------|--------------------|--------------|--------|--------|
| AKQEALVKER                   | 1172.4             | 2            | 2.9488 | 0.2407 |
| AKQEELEAALQR                 | 1386.5             | 2            | 4.3659 | 0.3068 |
| AKQIVWNGPVGVFWEAFAR          | 2305.6             | 3            | 5.3048 | 0.4283 |
| AKQNDQVSFASLVEELKK           | 2035.3             | 3            | 5.4107 | 0.4149 |
| AKQQGDHSLKEHELLEQQK          | 2247.5             | 3            | 4.1028 | 0.2997 |
| AKQTLENERGELANEVK            | 1930.1             | 2            | 5.6287 | 0.3782 |
| AKQTLENERGELANEVKVLLQGK      | 2568.9             | 3            | 4.0593 | 0.125  |
| AKRLEEIPLIK                  | 1310.6             | 2            | 2.9295 | 0.1017 |
| AKRPEVPFPEITR                | 1540.8             | 2            | 3.212  | 0.2553 |
| AKRPLMVLGSQALLTPTSADK        | 2198.6             | 3            | 4.5327 | 0.3852 |
| AKRPLMVLGSQALLTPTSADKLR      | 2468.0             | 3            | 5.0419 | 0.3105 |
| AKSEENTKEEKPSDK              | 1720.8             | 2            | 3.6826 | 0.2547 |
| AKSELNRLQQEETQLEQSIQAGR      | 2657.9             | 3            | 3.3184 | 0.2355 |
| AKSHLEVPLEENVNRR             | 1892.1             | 2            | 2.9848 | 0.2546 |
| AKTALEEQLSR                  | 1246.4             | 2            | 2.9588 | 0.1741 |
| AKTDAGGEDAILQTR              | 1546.7             | 2            | 4.3888 | 0.377  |
| AKTELLLSAEAAK                | 1345.6             | 2            | 3.3961 | 0.2993 |
| AKTGTDKTLVK                  | 1162.4             | 2            | 2.9117 | 0.1807 |
| AKTGTDKTLVKEVVQNFAK          | 2078.4             | 3            | 4.0704 | 0.2925 |
| AKTNADTDGMVK                 | 1251.4             | 2            | 3.578  | 0.363  |
| AKVAAVEMLK                   | 1060.3             | 2            | 2.8216 | 0.1984 |
| AKVAVLGASGGIGQPLSLLLK        | 1993.4             | 2            | 6.6125 | 0.4981 |
| AKVDEFPLCGHMSDEYEQLSSEALEAAR | 3226.5             | 3            | 4.6719 | 0.4083 |
| AKVETDDVKK                   | 1133.3             | 2            | 2.6573 | 0.2548 |
| AKVGAAEEELQK                 | 1273.4             | 2            | 4.0534 | 0.3442 |
| AKVIAAEGEMNASR               | 1447.6             | 2            | 3.4709 | 0.3683 |
| AKVKDEPQR                    | 1071.2             | 2            | 2.4577 | 0.2112 |
| AKVNDFLAEIFKK                | 1523.8             | 2            | 3.7993 | 0.363  |
| AKWDAWNALGSLPK               | 1557.8             | 2            | 3.6715 | 0.2361 |
| AKWEMPFDPQDTHQSR             | 1974.1             | 3            | 4.3233 | 0.4073 |
| AKYHGNVMLLR                  | 1302.6             | 2            | 2.587  | 0.2783 |
| AKYIYDSAFHPDTGEK             | 1843.0             | 2            | 5.1988 | 0.4196 |
| AKYPDYEVTWANDGY              | 1792.9             | 2            | 4.4225 | 0.3998 |
| AKYPSLGQKPGGSDFLMK           | 1925.2             | 2            | 2.9232 | 0.2597 |
| AKYVYDSAFHPDTGEK/VLIGR       | 2466.8             | 3            | 4.2034 | 0.2981 |
| ALAAAGYDVEK                  | 1108.2             | 2            | 3.664  | 0.441  |

| Peptide Sequence                           | Peptide mass (m/z) | Charge State | Xcorr  | DelCn2 |
|--------------------------------------------|--------------------|--------------|--------|--------|
| ALAAAGYDVEKNNSR                            | 1579.7             | 2            | 4.6796 | 0.433  |
| ALAAFLKK                                   | 862.1              | 2            | 2.6319 | 0.1806 |
| ALAAGGVGSIVR                               | 1071.3             | 2            | 4.1265 | 0.4121 |
| ALAAGGYDVEKNNSR                            | 1565.7             | 2            | 4.7712 | 0.4865 |
| ALAAPAAEEKEEAR                             | 1456.6             | 2            | 3.9814 | 0.4397 |
| ALAAPAAEEKEEAREK                           | 1713.9             | 2            | 4.5013 | 0.4093 |
| ALAAVLLQALDRPASPPAPSGSQQGPEEEAAEALLTETV    | 3900.3             | 3            | 5.158  | 0.3194 |
| ALAAVLLQALDRPASPPAPSGSQQGPEEEAAEALLTETVR   | 4056.5             | 3            | 6.0272 | 0.5175 |
| ALADHSMAQTPR                               | 1298.5             | 2            | 3.4185 | 0.3725 |
| ALADILSESLHSLATSLPR                        | 1995.3             | 2            | 3.1706 | 0.2827 |
| ALADVATVLGR                                | 1086.3             | 2            | 3.5997 | 0.2507 |
| ALAEGVLLR                                  | 942.1              | 2            | 2.9195 | 0.1863 |
| ALAEIAKAELDDTPMR                           | 1745.0             | 2            | 5.2636 | 0.4477 |
| ALAEIAKAELDDTPMRGR                         | 1958.2             | 3            | 3.7767 | 0.3566 |
| ALAEKRPGLHQRVLLHHDNAPAHSSHQTR              | 3406.8             | 3            | 3.2607 | 0.1715 |
| ALAENSGVK                                  | 889.0              | 2            | 2.49   | 0.1391 |
| ALAENSGVKANEVISK                           | 1630.8             | 2            | 4.6511 | 0.3436 |
| ALAFHPIEPVLITASEDHTLK                      | 2303.6             | 3            | 5.2976 | 0.373  |
| ALAFHPVEPVLVTASEDHTLK                      | 2275.6             | 3            | 5.6376 | 0.4008 |
| ALAGCDFLTISPK                              | 1336.6             | 2            | 2.7112 | 0.2535 |
| ALAGWLRPEDGGQAEGAEDELEVR                   | 2569.7             | 3            | 3.5333 | 0.3312 |
| ALAHLLAER                                  | 1123.3             | 2            | 3.3722 | 0.3665 |
| ALAHLLAERQER                               | 1536.7             | 2            | 3.5293 | 0.4829 |
| ALAIYEGQLGPDNPVAVR                         | 1899.1             | 3            | 4.778  | 0.4002 |
| ALALDEAVSQSTQITEFHDKIEPMLLETLENLSSR        | 3818.2             | 3            | 3.2004 | 0.1728 |
| ALAMGYKPK                                  | 979.2              | 2            | 2.635  | 0.2498 |
| ALANMHESLEWLASR                            | 1729.0             | 2            | 3.2667 | 0.2706 |
| ALANSLACQGK                                | 1076.3             | 2            | 3.7597 | 0.3805 |
| ALANVNIGSLICNVGAGGPAPAAGAAPAGGPAPSTAAAPAEK | 3754.2             | 3            | 7.1572 | 0.617  |
| ALAPEYAK                                   | 863.0              | 1            | 1.7383 | 0.1348 |
| ALAQALKEGR                                 | 1057.2             | 2            | 2.6961 | 0.1077 |
| ALAQEDQGAGEVER                             | 1473.5             | 2            | 4.9811 | 0.2705 |
| ALAQEILPQAPIAVR                            | 1590.9             | 2            | 2.8207 | 0.3094 |
| ALASEKSPTADAKPAPK                          | 1682.9             | 3            | 3.6438 | 0.2823 |
| ALASGGSALDAVESGCAMCER                      | 1999.2             | 2            | 4.082  | 0.277  |
| ALASILLQDHIR                               | 1350.6             | 2            | 3.5476 | 0.2984 |

| Peptide Sequence                    | Peptide mass (m/z) | Charge State | Xcorr  | DelCn2 |
|-------------------------------------|--------------------|--------------|--------|--------|
| ALASLMTYK                           | 998.2              | 2            | 3.2145 | 0.1838 |
| ALASPEQLAQLPSSGVPR                  | 1822.1             | 2            | 3.8338 | 0.3325 |
| ALASQLQDSLK                         | 1174.3             | 2            | 2.7129 | 0.2097 |
| ALAVELLDKVNPNPDNHAHYTEADDDDFEPHAIIR | 3860.1             | 3            | 4.6381 | 0.4013 |
| ALAVGGLGSIIR                        | 1127.4             | 2            | 3.5602 | 0.3458 |
| ALAVVYGPHEIR                        | 1325.5             | 2            | 3.1221 | 0.1738 |
| ALAYDKLEK                           | 1051.2             | 2            | 2.4795 | 0.1774 |
| ALDDFVLGSAR                         | 1164.3             | 2            | 3.9339 | 0.4122 |
| ALDDISESIKELQFYR                    | 1928.1             | 2            | 4.8025 | 0.4457 |
| ALDDMISTLKK                         | 1235.5             | 2            | 2.786  | 0.1896 |
| ALDEATKYALER                        | 1380.5             | 2            | 3.6423 | 0.3705 |
| ALDEATKYALERK                       | 1508.7             | 2            | 3.7621 | 0.3941 |
| ALDEGDIALLK                         | 1158.3             | 2            | 4.242  | 0.2831 |
| ALDELKQSYLTLESGAVPLLEDTASRIDELFQK   | 3695.1             | 3            | 3.3337 | 0.1089 |
| ALDELKQSYLTLESGAVPLLEDTASRIDELFQKR  | 3851.3             | 3            | 3.2934 | 0.2948 |
| ALDEMEKQQR                          | 1248.4             | 2            | 2.9381 | 0.2004 |
| ALDENAKLTQQLEEERIQQHQQK             | 2650.9             | 3            | 4.5367 | 0.2682 |
| ALDEPAKTESVSKDNTLEPPVETPTTLPR       | 3137.4             | 3            | 4.9733 | 0.3075 |
| ALDEYYDKHFTEFVPLR                   | 2144.4             | 2            | 4.9985 | 0.4776 |
| ALDEYYDKHFTEFVPLR TK                | 2373.6             | 3            | 5.081  | 0.3312 |
| ALDFAVGEYNK                         | 1227.3             | 2            | 3.508  | 0.3535 |
| ALDFAVGEYNKASNDMYHSR                | 2289.5             | 3            | 3.2257 | 0.2153 |
| ALDFIASK                            | 865.0              | 2            | 2.8899 | 0.2214 |
| ALDFIASKGVK                         | 1149.4             | 2            | 2.9529 | 0.2439 |
| ALDIDLKPLADSEKLPQK                  | 2223.6             | 3            | 4.4438 | 0.299  |
| ALDIDVEKLTQAELEKLLLD DSFETK         | 2978.3             | 3            | 4.3326 | 0.1438 |
| ALDKLDGTEINGR                       | 1402.5             | 2            | 3.8845 | 0.3231 |
| ALDKSDSHPSDALTR                     | 1613.7             | 2            | 4.676  | 0.2967 |
| ALDLFSDNAPPPELLEIINEDIAK            | 2639.0             | 3            | 4.894  | 0.404  |
| ALDLFSDNAPPPELLEIINEDIAKR           | 2795.1             | 3            | 5.9105 | 0.477  |
| ALDLNLKHQILPK                       | 1503.8             | 2            | 3.9504 | 0.2988 |
| ALDLPSSGEGLAFFTFPNIASATK            | 2455.7             | 3            | 5.7237 | 0.5315 |
| ALDMSYDHKPEDEVELAR                  | 2119.3             | 2            | 4.6541 | 0.3973 |
| ALDQFVNFSEQKEK                      | 1683.8             | 2            | 3.7052 | 0.2917 |
| ALDSNSLEND DLSAPGREPGHFN PESR       | 2926.0             | 3            | 4.1331 | 0.2216 |
| ALDTMNF DVIK                        | 1267.5             | 2            | 3.716  | 0.3657 |

| Peptide Sequence                        | Peptide mass (m/z) | Charge State | Xcorr  | DelCn2 |
|-----------------------------------------|--------------------|--------------|--------|--------|
| ALDVGSGSGILTACFAR                       | 1638.9             | 2            | 4.3351 | 0.4141 |
| ALDVIQAGKEYVEHTVK                       | 1901.2             | 2            | 3.1342 | 0.2469 |
| ALDVIQAGKEYVEHTVKER                     | 2186.5             | 3            | 5.0043 | 0.3889 |
| ALDVNVALR                               | 971.1              | 2            | 3.2373 | 0.3357 |
| ALDVSASDDEIAR                           | 1362.4             | 2            | 3.7706 | 0.3768 |
| ALDYMYLR                                | 1045.2             | 2            | 2.5478 | 0.1147 |
| ALEAAALAH                               | 867.0              | 2            | 2.9818 | 0.1886 |
| ALEAANGELEVK                            | 1244.4             | 2            | 4.417  | 0.3584 |
| ALEAANGELEVKIRDWYQK                     | 2234.5             | 3            | 3.2588 | 0.1472 |
| ALEAFDLDPAQWGVNVQPYSGSPANLAVYTALLQPHDR  | 4126.5             | 3            | 6.1028 | 0.5776 |
| ALEAGTAVELLDVFLGLETDGEELAGAIAGNPGAPLRER | 4008.4             | 3            | 5.2893 | 0.4359 |
| ALEATKLAIEAGFR                          | 1490.7             | 2            | 3.6872 | 0.3193 |
| ALEATTEHIR                              | 1141.3             | 2            | 2.6772 | 0.1226 |
| ALEATTEHIRQELAVFCSPEPPAK                | 2639.0             | 3            | 3.7026 | 0.2971 |
| ALEAVFGK                                | 835.0              | 1            | 2.4109 | 0.1755 |
| ALECHPDKHPENPK                          | 1615.8             | 2            | 3.2813 | 0.2001 |
| ALEDAFLAIDAK                            | 1277.4             | 2            | 4.0747 | 0.2924 |
| ALEDDIINHNLHQAQVAVSIGQSLK               | 2682.0             | 3            | 4.7517 | 0.1988 |
| ALEDIDEKISNEVLK                         | 1716.9             | 2            | 3.5411 | 0.2008 |
| ALEDMFDALEGK                            | 1339.5             | 2            | 3.7763 | 0.2664 |
| ALEEALAEAKEEFER                         | 1664.8             | 2            | 3.2866 | 0.2516 |
| ALEEALAEAKEEFERQNK                      | 2035.2             | 2            | 4.3314 | 0.216  |
| ALEEAMEQK                               | 1049.2             | 2            | 3.1733 | 0.1453 |
| ALEEAMEQKAELER                          | 1647.8             | 2            | 4.8963 | 0.4203 |
| ALEEAMEQKAELERLNK                       | 2003.3             | 2            | 5.3163 | 0.2986 |
| ALEEAMEQKAELERLNKQFR                    | 2434.8             | 3            | 3.8997 | 0.1857 |
| ALEEANMKLESR                            | 1391.6             | 2            | 3.3679 | 0.3157 |
| ALEEEQEAAREELER                         | 1731.8             | 2            | 3.3837 | 0.2202 |
| ALEEETKNHEAQIQDMR                       | 2043.2             | 2            | 5.3322 | 0.3596 |
| ALEELATKR                               | 1031.2             | 2            | 2.8346 | 0.1379 |
| ALEENNNFSK                              | 1166.2             | 2            | 2.7608 | 0.1389 |
| ALEEPAVDMLHTVTDMVR                      | 2028.3             | 2            | 2.791  | 0.2386 |
| ALEFVQTESQKDLEITKENLAQAVEHR             | 3128.4             | 3            | 6.7474 | 0.345  |
| ALEGLSELAAETDLPVVFVK                    | 2203.5             | 2            | 4.3744 | 0.4253 |
| ALEHAFQLEHIMDLTR                        | 1925.2             | 3            | 5.1814 | 0.4307 |
| ALEHFTDLYDIK                            | 1465.6             | 2            | 3.3786 | 0.3448 |

| Peptide Sequence                        | Peptide mass (m/z) | Charge State | Xcorr  | DelCn2 |
|-----------------------------------------|--------------------|--------------|--------|--------|
| ALEHFTDLYDIKR                           | 1621.8             | 3            | 4.6091 | 0.3791 |
| ALEIADFSGNPLSR                          | 1490.6             | 2            | 3.4893 | 0.2998 |
| ALEILLHPSEPHQPHLMLEGGSLSSAEYEAR         | 3413.8             | 3            | 3.6304 | 0.2245 |
| ALEKAEENAQR                             | 1259.4             | 2            | 2.9503 | 0.1825 |
| ALEKEAASEKQQLVETHLAR                    | 2252.5             | 3            | 3.3745 | 0.1279 |
| ALEKGIILTDMSRPVELSDRETLINSATTSLNSK      | 3834.3             | 3            | 5.2482 | 0.3717 |
| ALEKLDGTEVNGR                           | 1402.5             | 2            | 3.1747 | 0.2677 |
| ALEKNESSFASHK                           | 1448.6             | 2            | 3.2469 | 0.2943 |
| ALELDSNLYR                              | 1194.3             | 2            | 3.3159 | 0.2664 |
| ALELDSNNEK                              | 1133.2             | 2            | 3.0936 | 0.2161 |
| ALELDSNNEKGLFR                          | 1606.8             | 2            | 3.4842 | 0.2585 |
| ALELENDRLLLK                            | 1427.7             | 2            | 3.8594 | 0.1467 |
| ALELFLESLLK                             | 1276.5             | 2            | 4.4526 | 0.2711 |
| ALELTGLKVFGNEIKLEKPK                    | 2228.7             | 3            | 4.4558 | 0.3365 |
| ALENPDTASLLGR                           | 1357.5             | 2            | 3.1426 | 0.2751 |
| ALENVLSGKA                              | 1002.1             | 1            | 1.8896 | 0.1168 |
| ALEPALSDISVDWFVPDTVEALLTPR              | 2856.2             | 3            | 4.1058 | 0.2193 |
| ALEQALEKTK                              | 1131.3             | 2            | 3.1517 | 0.2191 |
| ALEQFATVVEAK                            | 1306.5             | 2            | 3.8125 | 0.3097 |
| ALEQQVEEMK                              | 1205.4             | 2            | 3.6828 | 0.2691 |
| ALEQQVEEMKTQLEEELEDELQATEDAK            | 3149.4             | 3            | 5.0338 | 0.4463 |
| ALEQQVEEMKTQLEEELEDELQATEDAKLR          | 3418.7             | 3            | 5.7826 | 0.4106 |
| ALEQQVEEMKTQLEEELEDELQATEDAKLRLEVNLQAMK | 4446.0             | 3            | 5.8432 | 0.4431 |
| ALEQQVEEMR                              | 1233.4             | 2            | 2.6968 | 0.1333 |
| ALEQQVEEMRTQLEEELEDELQATEDAKLR          | 3446.7             | 3            | 5.911  | 0.3057 |
| ALESALKEAKENASR                         | 1617.8             | 3            | 3.2624 | 0.2795 |
| ALESDFMAPVLIMATNR                       | 1733.0             | 2            | 4.729  | 0.3919 |
| ALESELQQLR                              | 1187.3             | 2            | 3.1824 | 0.1685 |
| ALESPERPFLAILGGAK                       | 1770.1             | 3            | 4.9435 | 0.1958 |
| ALESSIAPIVIFASNR                        | 1688.9             | 2            | 4.6519 | 0.4556 |
| ALETNTHVK                               | 1013.1             | 2            | 2.5521 | 0.2828 |
| ALEVAEYLTPVLK                           | 1446.7             | 2            | 3.2914 | 0.216  |
| ALEVAEYLTPVLKESK                        | 1791.1             | 2            | 2.5973 | 0.2098 |
| ALEVIKPAHILQEKEEQHQLAVTAYLK             | 3101.6             | 3            | 6.7302 | 0.5118 |
| ALEVTKLAIEAGFR                          | 1518.8             | 2            | 2.8774 | 0.368  |
| ALEVYDLIR                               | 1092.3             | 2            | 3.2071 | 0.379  |

| Peptide Sequence                      | Peptide mass (m/z) | Charge State | Xcorr  | DelCn2 |
|---------------------------------------|--------------------|--------------|--------|--------|
| ALEYIENLR                             | 1121.3             | 2            | 3.3503 | 0.223  |
| ALFDYDKTKDSGLPSQGLNFK                 | 2345.6             | 3            | 3.4231 | 0.2869 |
| ALFEEVPELLTEAEKK                      | 1847.1             | 2            | 3.6888 | 0.299  |
| ALFLETEQLK                            | 1192.4             | 2            | 3.5739 | 0.1497 |
| ALFLETEQLKK                           | 1320.6             | 2            | 2.7621 | 0.1361 |
| ALFQDIK                               | 835.0              | 2            | 2.5799 | 0.1326 |
| ALFQDIKPAEDEWGKTPDAMK                 | 2519.9             | 3            | 4.7349 | 0.4521 |
| ALFQDIKPAEDEWGKTPDAMKAAMALEK          | 3234.7             | 3            | 5.5365 | 0.2215 |
| ALFVSEEEKK                            | 1180.3             | 2            | 2.7018 | 0.1215 |
| ALGALVDSCAPGLCPDWDSWDASKPVTNAR        | 3117.5             | 3            | 4.8689 | 0.3155 |
| ALGDPATPTEGPR                         | 1282.4             | 2            | 3.1181 | 0.2869 |
| ALGGHMTTLSGEEISYTGSDGIEGGLLASIR       | 3094.4             | 3            | 3.4472 | 0.1567 |
| ALGHQLGR                              | 852.0              | 2            | 2.4576 | 0.2502 |
| ALGHRPIPNQPPTAAHTANFLLNASGSTSTPAPSR   | 3551.9             | 3            | 7.7913 | 0.5339 |
| ALGISPFHEHAEEVFTANDSGPR               | 2452.7             | 3            | 5.8299 | 0.5446 |
| ALGISPFHEHAEEVFTANDSGPRR              | 2608.9             | 3            | 3.3515 | 0.3077 |
| ALGKHPVSCK                            | 1040.3             | 2            | 2.6422 | 0.3095 |
| ALGKHPVSCKDTPGFIVNR                   | 2040.4             | 3            | 5.0352 | 0.4953 |
| ALGLGVEQLPVVFEDEVVLHQATILPK           | 2787.3             | 3            | 4.4596 | 0.4179 |
| ALGLKDIFDESKADLSGIASGGR               | 2321.6             | 3            | 4.8171 | 0.2946 |
| ALGLQFHRSR                            | 1029.2             | 2            | 2.9475 | 0.1237 |
| ALGMKLPETNLFETEETRK                   | 2208.5             | 3            | 4.4231 | 0.1009 |
| ALGPGLGTPTPR                          | 1137.3             | 2            | 3.3333 | 0.3088 |
| ALGQAASDNSGPEDAKR                     | 1687.8             | 2            | 4.3353 | 0.3145 |
| ALGQEHDTLQVVK                         | 1471.7             | 2            | 2.4581 | 0.1128 |
| ALGQNPTNAEVLK                         | 1355.5             | 2            | 3.8786 | 0.2776 |
| ALGQNPTNAEVLKVLGNPKSDEMNVK            | 2768.1             | 3            | 4.477  | 0.2892 |
| ALGSAAADAQR                           | 1031.1             | 2            | 2.8101 | 0.1643 |
| ALGSAIEYTIENVFESAPNPR                 | 2279.5             | 2            | 3.9776 | 0.3787 |
| ALGSEVQDASK                           | 1105.2             | 2            | 2.7614 | 0.2186 |
| ALGSQYQNR                             | 1037.1             | 2            | 2.8056 | 0.1849 |
| ALGSVGPVDLLVNNAAVALLQPFLEVTK          | 2850.3             | 3            | 3.6297 | 0.1656 |
| ALGVEQDLALPAIAVIGDQSSGKSSVLEALSGVALPR | 3634.1             | 3            | 4.4595 | 0.3059 |
| ALGVSNFHFQIEK                         | 1577.8             | 2            | 3.55   | 0.2595 |
| ALGYFAVVTGK                           | 1126.3             | 2            | 3.3756 | 0.4122 |
| ALHAELVQHFR                           | 1321.5             | 2            | 3.2812 | 0.2851 |



| Peptide Sequence                      | Peptide mass (m/z) | Charge State | Xcorr  | DelCn2 |
|---------------------------------------|--------------------|--------------|--------|--------|
| ALHDTGKFTDGQLVSQK                     | 1846.0             | 3            | 3.4798 | 0.1526 |
| ALHEKVNIVPLIAK                        | 1545.9             | 2            | 3.9048 | 0.4371 |
| ALHESGSQNKK                           | 1199.3             | 2            | 2.5619 | 0.1854 |
| ALHFVFK                               | 862.1              | 2            | 2.4294 | 0.1541 |
| ALHHGIDLEK                            | 1133.3             | 2            | 2.714  | 0.1964 |
| ALHLGNNVLQSLPSR                       | 1619.9             | 2            | 2.8323 | 0.2048 |
| ALHLLLEEYR                            | 1144.3             | 2            | 3.1882 | 0.1911 |
| ALHPREPLPPIQQHIWNMLNPPAEVTTK          | 3229.7             | 3            | 3.7282 | 0.1878 |
| ALHSDRPPSASQPR                        | 1519.6             | 2            | 3.194  | 0.2569 |
| ALHSLLLR                              | 923.1              | 2            | 2.4171 | 0.1761 |
| ALHSVLRQAVPLNELR                      | 1660.9             | 2            | 4.3463 | 0.4479 |
| ALIAAQLDNAIEKELLER                    | 2011.3             | 2            | 4.516  | 0.4769 |
| ALIAAQYSGAQVR                         | 1348.5             | 2            | 4.7279 | 0.3953 |
| ALIAGGGAPEIELALR                      | 1551.8             | 2            | 4.2289 | 0.3859 |
| ALIDPSSGLPNRLPPGAVPPGAR               | 2253.6             | 3            | 4.0136 | 0.2183 |
| ALIEILATR                             | 1000.2             | 2            | 3.4325 | 0.2861 |
| ALIEMEKQQQDQVDR                       | 1832.0             | 3            | 4.9501 | 0.3862 |
| ALIEMEKQQQDQVDRNIKEAR                 | 2543.8             | 3            | 3.3351 | 0.113  |
| ALIEVLQPLIAEHQAR                      | 1802.1             | 2            | 4.6386 | 0.3994 |
| ALIGATNPADAPPGTIR                     | 1635.8             | 2            | 4.9895 | 0.3612 |
| ALILVGGYGTR                           | 1120.3             | 2            | 3.1325 | 0.3015 |
| ALILVGLER                             | 984.2              | 2            | 3.264  | 0.2191 |
| ALINADELASDVAGAEALLDR                 | 2128.3             | 2            | 5.6886 | 0.4233 |
| ALINADELASDVAGAEALLDRHQEHKGEIDAHEDSFK | 4017.3             | 3            | 3.9115 | 0.211  |
| ALINSPEGAVGR                          | 1184.3             | 2            | 3.1364 | 0.2864 |
| ALIPLALEGTDVGQTK                      | 1626.9             | 2            | 4.805  | 0.5041 |
| ALIPSLEGRFEDEELQQILDDIQTKR            | 3058.4             | 3            | 4.8116 | 0.2487 |
| ALIVEPSRELAEQTLNNIK                   | 2139.4             | 2            | 4.5507 | 0.2903 |
| ALIVEPSRELAEQTLNNIKQFKK               | 2671.1             | 3            | 4.3948 | 0.3067 |
| ALIVLAHSER                            | 1109.3             | 2            | 2.8796 | 0.123  |
| ALIVVPYAEGVIPDEAK                     | 1785.1             | 2            | 5.0279 | 0.4686 |
| ALKANGEVIIIEPTR                       | 1624.9             | 2            | 2.8746 | 0.2411 |
| ALKASAPAPGHH                          | 1157.3             | 2            | 3.1628 | 0.2656 |
| ALKDEEKMELQEIQLK                      | 1946.3             | 2            | 5.9146 | 0.3634 |
| ALKDEEKMELQEIQLKEAK                   | 2274.6             | 2            | 6.5073 | 0.3576 |
| ALKDEEKMELQELQLK                      | 1946.3             | 3            | 5.9386 | 0.3583 |

| Peptide Sequence                  | Peptide mass (m/z) | Charge State | Xcorr  | DelCn2 |
|-----------------------------------|--------------------|--------------|--------|--------|
| ALKDEEKMELQELQLKEAK               | 2274.6             | 2            | 6.6791 | 0.3407 |
| ALKDEIDVLR                        | 1172.4             | 2            | 3.0089 | 0.2501 |
| ALKDKIEKAVVSQR                    | 1585.9             | 2            | 3.2102 | 0.3108 |
| ALKDQINQLELLLLKER                 | 1925.3             | 2            | 3.1733 | 0.2614 |
| ALKEASMVITESPAALQLR               | 2029.4             | 3            | 6.5305 | 0.5302 |
| ALKEAVKEIQTSAK                    | 1516.8             | 2            | 4.2149 | 0.3346 |
| ALKEDDPKAALSSFQK                  | 1749.0             | 2            | 4.9027 | 0.3868 |
| ALKEEIGNVQLEK                     | 1471.7             | 2            | 3.8362 | 0.1301 |
| ALKENKDQLESVLEVLHR                | 2122.4             | 3            | 4.3827 | 0.3287 |
| ALKGIGTDEFTLNR                    | 1535.7             | 3            | 3.5714 | 0.1951 |
| ALKHELAFK                         | 1057.3             | 2            | 2.6337 | 0.247  |
| ALKLPSTGEGTQFYLFENVDNAQQFK        | 2947.2             | 3            | 5.2439 | 0.3649 |
| ALKNHQLEVTPK                      | 1378.6             | 2            | 2.4019 | 0.1079 |
| ALKNNSNDIVNAIMELTM                | 1992.3             | 2            | 3.9725 | 0.3479 |
| ALKPEVDKLNIMAAS                   | 1642.0             | 2            | 3.901  | 0.3269 |
| ALKPMHSLIPLGK                     | 1405.8             | 2            | 2.655  | 0.1919 |
| ALKPPPIKLYR                       | 1296.6             | 3            | 3.2899 | 0.2035 |
| ALKSEFLVR                         | 1063.3             | 2            | 2.6585 | 0.2327 |
| ALKSEVQKLQTLVSEQPNKDVEQMEK        | 3100.5             | 3            | 3.8391 | 0.2325 |
| ALKSVLVSAGNVKR                    | 1442.7             | 2            | 2.5686 | 0.16   |
| ALKVLDNYLTSPLPEEVDETSAEDEGVSQRK   | 3434.7             | 3            | 5.1075 | 0.3695 |
| ALLADAQLMLDHLK                    | 1552.9             | 2            | 4.492  | 0.3848 |
| ALLANQDSGEVQQDPK                  | 1713.8             | 3            | 4.9098 | 0.4213 |
| ALLAPLVAPEAGEAEPGSQER             | 2106.3             | 2            | 4.8847 | 0.5002 |
| ALLDASETSTRK                      | 1393.5             | 2            | 2.5858 | 0.2218 |
| ALLDFEDKDGDKVAVAGDEWLFEGPGTYIPR   | 3354.7             | 3            | 6.2515 | 0.4434 |
| ALLDSLQLGPDSTLVHLIHEVTK           | 2500.9             | 2            | 4.0653 | 0.3991 |
| ALLDYGVTADAR                      | 1265.4             | 2            | 3.2915 | 0.3729 |
| ALLEEAFDNLKDEMFR                  | 1942.2             | 2            | 2.9739 | 0.3677 |
| ALLELQEYFGSLAA                    | 1525.7             | 2            | 2.7546 | 0.2831 |
| ALLELQLEPEELYQTFQR                | 2221.5             | 2            | 5.3383 | 0.3989 |
| ALLENMEGLFLAVDEIVDGGVILESDPQQVVHR | 3608.1             | 3            | 6.823  | 0.5329 |
| ALLEVVQSGGK                       | 1101.3             | 2            | 3.8661 | 0.2662 |
| ALLKDQQPGTFLLR                    | 1600.9             | 2            | 2.6806 | 0.14   |
| ALLKFPDIYGPRPAVTAPEVINYADYSLR     | 3251.7             | 3            | 4.7539 | 0.4181 |
| ALLLPDYLLVTVMLSGIK                | 2010.5             | 2            | 4.403  | 0.3032 |

| Peptide Sequence               | Peptide mass (m/z) | Charge State | Xcorr  | DelCn2 |
|--------------------------------|--------------------|--------------|--------|--------|
| ALLLSHQFK                      | 1057.3             | 2            | 2.7796 | 0.13   |
| ALLNVVDNAR                     | 1085.2             | 2            | 2.6746 | 0.2299 |
| ALLQEMPLTALLR                  | 1469.8             | 2            | 3.8596 | 0.3274 |
| ALLQMVQQFAVDFEK                | 1768.1             | 2            | 3.6391 | 0.3345 |
| ALLQMVQQFGVDFEK                | 1754.0             | 2            | 2.4456 | 0.1569 |
| ALLQMVQQFGVDFEKR               | 1910.2             | 2            | 3.0661 | 0.3223 |
| ALLQQPEDDSKR                   | 1528.6             | 2            | 3.4077 | 0.2827 |
| ALLQSGAPAVPQLLHMPDFEGLYPVHLAVR | 3241.8             | 3            | 4.2567 | 0.4329 |
| ALLQSSASR                      | 933.0              | 2            | 2.6467 | 0.2982 |
| ALLSAPWYLNAR                   | 1304.5             | 2            | 3.1014 | 0.2939 |
| ALLSHDSGSDHLAFVR               | 1725.9             | 2            | 4.3652 | 0.4312 |
| ALLSSDDPPAEVDIFELLK            | 2160.4             | 2            | 5.3276 | 0.5123 |
| ALLSVHDTVAQK                   | 1282.5             | 2            | 2.6161 | 0.2709 |
| ALLTPVAIAAGR                   | 1153.4             | 2            | 3.8699 | 0.3215 |
| ALLVEPVINSYLLAER               | 1801.1             | 2            | 5.481  | 0.5018 |
| ALLVEPVINSYLLAERDLYLENPEIK     | 3016.5             | 2            | 3.3128 | 0.2276 |
| ALMAAEDKYSQKEDRYEEEEIK         | 2547.8             | 3            | 4.3918 | 0.2832 |
| ALMAAEDKYSQKEDRYEEEEIKVLSDK    | 3090.4             | 3            | 5.1066 | 0.2544 |
| ALMAAEDKYSQKEDRYEEEEIKVLSDKLK  | 3331.7             | 3            | 4.6101 | 0.2751 |
| ALMDEVVK                       | 905.1              | 1            | 1.8437 | 0.1617 |
| ALMDEVVKATSR                   | 1320.5             | 2            | 2.8413 | 0.3589 |
| ALMGSPQLVAAVVR                 | 1412.7             | 2            | 3.3026 | 0.3126 |
| ALMLQGVDLLADAVAVTMGPK          | 2114.6             | 3            | 6.4054 | 0.5277 |
| ALMLQGVDLLADAVAVTMGPKGR        | 2327.8             | 2            | 3.1495 | 0.3327 |
| ALMTVGKEPFPTIYVDSQKENER        | 2654.0             | 3            | 5.1818 | 0.4013 |
| ALMTVGKEPFPTIYVDSQKENERWNVISK  | 3381.8             | 3            | 4.8763 | 0.3066 |
| ALNAGYILNGLTVSIPGLER           | 2072.4             | 2            | 4.7348 | 0.4053 |
| ALNALCDGLIDELNQALK             | 1915.2             | 2            | 5.7843 | 0.4346 |
| ALNDHHVYLEGTLLKPNMVTAGHACTK    | 2935.4             | 3            | 3.7102 | 0.1902 |
| ALNEALKLFLK                    | 1147.4             | 2            | 3.1754 | 0.2596 |
| ALNEGGFQSIPK                   | 1261.4             | 2            | 3.3563 | 0.3507 |
| ALNEVFIGESLSSR                 | 1522.7             | 2            | 3.3112 | 0.2349 |
| ALNFLVNEFLLK                   | 1421.7             | 2            | 3.3803 | 0.2503 |
| ALNLGYALDYAQR                  | 1468.6             | 2            | 2.7853 | 0.3723 |
| ALNRPPTYPTK                    | 1258.5             | 2            | 2.5806 | 0.141  |
| ALNVEPDGTGLTCSLAPNIISQL        | 2327.6             | 2            | 3.2012 | 0.215  |

| Peptide Sequence                    | Peptide mass (m/z) | Charge State | Xcorr  | DelCn2 |
|-------------------------------------|--------------------|--------------|--------|--------|
| ALPAMMQWVR                          | 1203.5             | 2            | 3.6451 | 0.3864 |
| ALPDFKGIQTSDPNAVVMGLAPEHFHYQILNQAFR | 3927.4             | 3            | 4.8494 | 0.3677 |
| ALPDMEVVGLNFSSATTPELLLK             | 2446.8             | 2            | 5.704  | 0.5536 |
| ALPESLGQHALR                        | 1292.5             | 2            | 3.1047 | 0.3333 |
| ALPEVHYHLGQK                        | 1392.6             | 2            | 2.7704 | 0.2746 |
| ALPFWNEEIVPQIK                      | 1685.0             | 2            | 4.4199 | 0.3546 |
| ALPFWNEEIVPQIKEGK                   | 1999.3             | 2            | 3.6682 | 0.236  |
| ALPFWNEEIVPQIKEGKR                  | 2155.5             | 2            | 3.6533 | 0.2295 |
| ALPGQLKPFETLLSQNQGGK                | 2127.4             | 2            | 4.8509 | 0.4277 |
| ALPLALVLHELGAGR                     | 1530.8             | 2            | 5.4572 | 0.5366 |
| ALPLEAEVAPVKDMAQLPETEIAPAKDVAPSTVK  | 3531.1             | 3            | 5.4576 | 0.4281 |
| ALPLIVGAQLIHADK                     | 1559.9             | 2            | 3.4776 | 0.3742 |
| ALPLIVGAQLIHADKLGEK                 | 1987.4             | 2            | 5.2914 | 0.5301 |
| ALPLIVGAQLIHADKLGEKVEDSTMPIRR       | 3172.7             | 3            | 4.7007 | 0.3013 |
| ALQALEELRLQAEER                     | 1970.2             | 3            | 4.6097 | 0.2545 |
| ALQALQQEHKAEIITVSDGR                | 2208.5             | 3            | 4.7464 | 0.4326 |
| ALQASALAAWGGK                       | 1244.4             | 2            | 4.4754 | 0.396  |
| ALQASALK                            | 802.0              | 1            | 1.8958 | 0.125  |
| ALQASALNAWR                         | 1201.4             | 2            | 3.9466 | 0.378  |
| ALQATVGNYSYK                        | 1152.3             | 2            | 3.939  | 0.2572 |
| ALQDEWDAVMLHSFTLR                   | 2033.3             | 2            | 5.0357 | 0.5264 |
| ALQDFKEGNAIFTFPNTPVK                | 2238.5             | 3            | 4.5906 | 0.1446 |
| ALQDLENAASGDAAVHQR                  | 1867.0             | 2            | 5.1832 | 0.4498 |
| ALQDLENAASGDATVR                    | 1631.7             | 2            | 4.9411 | 0.4342 |
| ALQDLQLDQGNQKDFIK                   | 1975.2             | 2            | 3.5922 | 0.3463 |
| ALQDPNVAAFMVEPIQGEAGVVVPPDGYLMGVR   | 3442.0             | 3            | 3.3383 | 0.1192 |
| ALQEALVLSDR                         | 1215.4             | 2            | 3.7915 | 0.2267 |
| ALQEELSQAK                          | 1117.2             | 2            | 2.6085 | 0.1495 |
| ALQEGDLASSR                         | 1147.2             | 2            | 3.3487 | 0.2997 |
| ALQFLEEVK                           | 1077.3             | 2            | 3.0278 | 0.2275 |
| ALQFLEEVKVSR                        | 1419.7             | 2            | 3.1777 | 0.2616 |
| ALQGDYDQSR                          | 1153.2             | 2            | 2.9648 | 0.2803 |
| ALQKYEKEKFEEMIQQIK                  | 2284.7             | 2            | 3.2749 | 0.2296 |
| ALQLLDEVLHTMPIADPQPLD               | 2330.7             | 2            | 3.2691 | 0.2793 |
| ALQNAVTTTFVNR                       | 1334.5             | 2            | 3.8087 | 0.3661 |
| ALQPIVSEEEWAHTK                     | 1738.9             | 2            | 2.8156 | 0.1392 |

| Peptide Sequence                    | Peptide mass (m/z) | Charge State | Xcorr  | DelCn2 |
|-------------------------------------|--------------------|--------------|--------|--------|
| ALQPLEEGEDEEKVSHQAGDHWLIR           | 2888.1             | 3            | 4.191  | 0.3737 |
| ALQPLEEGEDEEKVSHQAGDHWLIRGPLEYVPSAK | 3930.3             | 3            | 4.8646 | 0.4153 |
| ALQQNGAPGIAK                        | 1168.3             | 2            | 3.9423 | 0.2849 |
| ALQQYTLEPSEKPFDLK                   | 2008.3             | 3            | 4.7468 | 0.3246 |
| ALQRPSAAAPQAENGPAAPAVAAPAATEAPK     | 2967.3             | 3            | 6.4399 | 0.4543 |
| ALQSVGQIVGEVLK                      | 1441.7             | 2            | 4.3022 | 0.3579 |
| ALQSVGQIVGEVLKQLTEEK                | 2170.5             | 2            | 4.0677 | 0.3893 |
| ALRAELEALLSSKDDVGK                  | 1916.2             | 2            | 3.7588 | 0.2594 |
| ALRAELEALLSSKDDVGKSVHELER           | 2767.1             | 3            | 7.887  | 0.5247 |
| ALRDAKLDKAQIHDLVLVGGSTR             | 2477.8             | 3            | 4.9853 | 0.3133 |
| ALRDAKLDKSQIHDLVLVGGSTR             | 2493.8             | 3            | 4.0078 | 0.2902 |
| ALRETLPAEQDLTTK                     | 1686.9             | 3            | 4.0022 | 0.3459 |
| ALRETLPAEQDLTTKNVSIIVGK             | 2554.9             | 3            | 3.3697 | 0.1447 |
| ALRPDLADKVASVYEAPGFFLDLEPIPGALDAVR  | 3628.1             | 3            | 5.9407 | 0.4313 |
| ALRPPHGPPRPGALTPTPSLSSQALPSPR       | 2957.4             | 3            | 3.5261 | 0.4258 |
| ALRQENAGLLGR                        | 1298.5             | 2            | 3.0313 | 0.2625 |
| ALRTDYNASVSPDSSGPER                 | 2122.2             | 2            | 5.5603 | 0.5085 |
| ALRYPMAVGLNK                        | 1333.6             | 2            | 3.3113 | 0.2001 |
| ALSAIADLLTNEHER                     | 1653.8             | 2            | 5.0661 | 0.4822 |
| ALSDHHIYLEGTLKPNMVTTPGHACTQK        | 3076.5             | 3            | 6.6948 | 0.5006 |
| ALSEIAGMTLPYDTLDQVR                 | 2094.4             | 2            | 5.8887 | 0.4847 |
| ALSEPRAKAYS DPSTGEPATY GELQQR       | 3110.3             | 3            | 3.202  | 0.2247 |
| ALSFLGFSAPTPIQALTLPAIR              | 2356.8             | 2            | 3.58   | 0.3933 |
| ALSKDLPK                            | 872.0              | 2            | 2.9174 | 0.1064 |
| ALSLDGEQLIGNKHYAVDSIRPK             | 2525.8             | 3            | 5.1684 | 0.2882 |
| ALSNLESIPGGYNALR                    | 1675.9             | 2            | 3.8587 | 0.3419 |
| ALSPSDSLEIFTKLEEIQQQILQQK           | 2888.3             | 3            | 5.0323 | 0.299  |
| ALSRQEMQEVQSSR                      | 1649.8             | 2            | 4.4953 | 0.2481 |
| ALSSEGKPYVTKEELYQNLTR               | 2427.7             | 3            | 5.8433 | 0.5122 |
| ALSSSEFERLPVFNK                     | 1724.9             | 2            | 3.2628 | 0.1393 |
| ALSSGGSITSPPLSPALPK                 | 1781.0             | 2            | 3.5226 | 0.3559 |
| ALSSQHQR                            | 998.1              | 2            | 3.2565 | 0.3062 |
| ALSTDPAAPNLK                        | 1198.4             | 2            | 3.1835 | 0.2899 |
| ALSTGEKGFYK                         | 1258.4             | 2            | 2.8817 | 0.3505 |
| ALSTQVEELKDELVTQR                   | 1960.2             | 3            | 3.8505 | 0.2416 |
| ALSVGNIDDALQCYSEAIK                 | 2011.2             | 2            | 4.7084 | 0.1698 |

| Peptide Sequence                        | Peptide mass (m/z) | Charge State | Xcorr  | DelCn2 |
|-----------------------------------------|--------------------|--------------|--------|--------|
| ALSVGNIDDALQCYSEAIKLDPHNHVLYSNR         | 3457.8             | 3            | 4.5573 | 0.3294 |
| ALTAHLYSLLQTQHALGDAFADLSQK              | 2814.1             | 3            | 6.2077 | 0.4834 |
| ALTDKVTDLLGGLFSK                        | 1679.0             | 2            | 3.5621 | 0.3897 |
| ALTDYRAELRDDPIISTHLAK                   | 2399.7             | 2            | 3.183  | 0.2849 |
| ALTEKNKELEIAQDRNIAIQSQFTR               | 2918.3             | 3            | 3.2334 | 0.2081 |
| ALTFWNEEIVPQIK                          | 1688.9             | 2            | 3.3612 | 0.3225 |
| ALTFWNEEIVPQIKEGKR                      | 2159.5             | 2            | 3.4225 | 0.2327 |
| ALTGGIAHLFK                             | 1128.3             | 2            | 3.6318 | 0.4023 |
| ALTGHLEEVVLALLK                         | 1606.9             | 2            | 4.6198 | 0.4118 |
| ALTGHLEEVVLALLKTPAQFDADELK              | 2851.2             | 3            | 5.3328 | 0.2846 |
| ALTHIDHSLSR                             | 1250.4             | 2            | 2.6553 | 0.2858 |
| ALTLDQWLEQHKGDFNLL                      | 2142.4             | 2            | 2.5976 | 0.1175 |
| ALTLGALTLPLAR                           | 1310.6             | 2            | 4.1915 | 0.3163 |
| ALTLHYDRYTTTSR                          | 1597.8             | 2            | 2.5468 | 0.1558 |
| ALTQTGGPHVK                             | 1109.3             | 2            | 3.433  | 0.3239 |
| ALTQVLSQANTGGVQSTLLLLNNEGSLLAYSGYGDTDAR | 3900.2             | 3            | 4.3149 | 0.1498 |
| ALTSEIALLQSR                            | 1302.5             | 3            | 4.0403 | 0.24   |
| ALTSELANAR                              | 1046.2             | 2            | 3.3475 | 0.316  |
| ALTSELANARDESK                          | 1505.6             | 2            | 3.5368 | 0.254  |
| ALTSELANARDESKK                         | 1633.8             | 2            | 4.5548 | 0.3092 |
| ALTSELANARDESKKTANDMIHAENMR             | 3018.3             | 3            | 4.4587 | 0.2907 |
| ALTSFERDSIFSNLTGQLDYQGFEK               | 2868.1             | 3            | 6.0182 | 0.3888 |
| ALTSQLTDEELAQGR                         | 1632.8             | 2            | 4.2997 | 0.4193 |
| ALTTMGFR                                | 897.1              | 2            | 2.4098 | 0.1578 |
| ALTVGGFIEEEKEDLLQHFSTANQGPK             | 2960.2             | 3            | 4.2002 | 0.2156 |
| ALTVPELTQQMFDK                          | 1693.0             | 3            | 4.7055 | 0.4322 |
| ALTVPELTQQMFDAR                         | 1721.0             | 2            | 3.4242 | 0.4246 |
| ALTVPELTQQMFDSK                         | 1709.0             | 2            | 3.9141 | 0.4461 |
| ALTVPELTQQVFDAK                         | 1660.9             | 3            | 4.7168 | 0.4525 |
| ALVADSHPESEK                            | 1311.4             | 2            | 3.7247 | 0.4329 |
| ALVAIGHDLDTLSGPFITYAK                   | 2292.6             | 2            | 5.8005 | 0.5188 |
| ALVATPGKK                               | 885.1              | 1            | 2.1666 | 0.228  |
| ALVDELEWEIAQVDPK                        | 1856.1             | 2            | 4.0973 | 0.1336 |
| ALVDELEWEIAQVDPKK                       | 1984.2             | 2            | 4.9806 | 0.2449 |
| ALVDGPCTQVR                             | 1159.3             | 2            | 2.8468 | 0.1833 |
| ALVDHENVISCPHLGASTK                     | 1992.2             | 3            | 3.9391 | 0.3923 |

| Peptide Sequence                        | Peptide mass (m/z) | Charge State | Xcorr  | DelCn2 |
|-----------------------------------------|--------------------|--------------|--------|--------|
| ALVDHHDAAEVKEK                          | 1491.6             | 2            | 3.6828 | 0.3233 |
| ALVDLADPR                               | 970.1              | 2            | 3.2048 | 0.2422 |
| ALVDNEQLR                               | 1058.2             | 2            | 2.402  | 0.1148 |
| ALVDNEQLRHELAQLR                        | 1906.1             | 2            | 2.9917 | 0.1085 |
| ALVEDTKLLVSGAASTPDKLAQAAQSSAATITQLAEVVK | 3898.4             | 3            | 4.562  | 0.3711 |
| ALVERGGVVTSNPLGF                        | 1616.8             | 2            | 2.4396 | 0.1147 |
| ALVEVLGPYEPILLSR                        | 1656.9             | 2            | 4.1004 | 0.3047 |
| ALVFQPVAEKLDQTD FEHRIPK                 | 2582.9             | 3            | 3.2207 | 0.287  |
| ALVHERDEAAYGELR                         | 1729.9             | 2            | 4.6638 | 0.3454 |
| ALVLAPEFLESLEPDLPALR                    | 2194.6             | 3            | 3.2385 | 0.1389 |
| ALVLELCCNDESGEDVEVPYVR                  | 2453.7             | 3            | 4.1867 | 0.3122 |
| ALVNLAADPGLHETLLAADPGLPAR               | 2496.8             | 3            | 4.1032 | 0.2442 |
| ALVNQLHER                               | 1080.2             | 2            | 2.979  | 0.2656 |
| ALVNQLHERVEHIK                          | 1686.9             | 2            | 2.4338 | 0.1141 |
| ALVQNDTLLQVK                            | 1342.6             | 2            | 3.8441 | 0.2734 |
| ALVSAQWVAEALR                           | 1414.6             | 2            | 4.1044 | 0.2683 |
| ALVSAQWVAEALRAPR                        | 1739.0             | 2            | 3.1482 | 0.1563 |
| ALVSEEGEGKNPVDYIQGLLDLK                 | 2488.8             | 3            | 4.8284 | 0.3007 |
| ALVSGKPAESSAVAATEK                      | 1716.9             | 2            | 5.5734 | 0.4732 |
| ALVSGKPAESSAVAATEKK                     | 1845.1             | 2            | 5.6326 | 0.452  |
| ALVSHNGSLINVGSLLR                       | 1879.2             | 3            | 4.0217 | 0.2714 |
| ALVSTLVPLGLVLAVGAVAVGVAR                | 2246.8             | 2            | 3.0775 | 0.3685 |
| ALVYGHGDPK                              | 1265.4             | 2            | 3.0223 | 0.3316 |
| ALVYGHGDPKVVVELK                        | 1834.1             | 2            | 2.8726 | 0.2792 |
| ALXEVQLPLIAEHQAR                        | 1802.1             | 2            | 2.5306 | 0.179  |
| ALYAIPLGDYVSHEDILPYTSTDQVPIQHELPER      | 3932.3             | 3            | 4.9761 | 0.3237 |
| ALYALQDIVSR                             | 1249.4             | 2            | 3.2415 | 0.2532 |
| ALYDTFSAFGNILSCK                        | 1751.0             | 2            | 4.3557 | 0.4236 |
| ALYEQSLHIK                              | 1202.4             | 2            | 2.4252 | 0.1628 |
| ALYESELADAR                             | 1238.3             | 2            | 2.7686 | 0.2235 |
| ALYETELADAR                             | 1252.4             | 2            | 2.8961 | 0.2103 |
| ALYLIATNGTPELQNPEKLSPIFRDFLNR           | 3332.8             | 3            | 4.8524 | 0.4031 |
| ALYLSDNDFEILPPDIGKLT                    | 2363.7             | 3            | 3.2209 | 0.1979 |
| ALYPSSVGQPFQAYLEINKNPK                  | 2522.8             | 2            | 4.1663 | 0.3412 |
| ALYTLSGETEELSR                          | 1569.7             | 2            | 2.8476 | 0.1677 |
| AMAAEAEASR                              | 1007.1             | 2            | 3.1505 | 0.2651 |

| Peptide Sequence                | Peptide mass (m/z) | Charge State | Xcorr  | DelCn2 |
|---------------------------------|--------------------|--------------|--------|--------|
| AMADALLER                       | 990.2              | 2            | 3.5677 | 0.2625 |
| AMADPEVQQIMSDPAMR               | 1891.2             | 2            | 3.4044 | 0.3194 |
| AMAGDTSLSENYAFAGMYHVFDQHVDEAVPR | 3430.7             | 3            | 4.5561 | 0.4076 |
| AMDDGVKELLTVGQEHWK              | 2057.3             | 3            | 4.6521 | 0.3204 |
| AMDDKRFDEATQLR                  | 1696.9             | 3            | 3.5286 | 0.1295 |
| AMDFYDPAK                       | 1086.2             | 2            | 2.9783 | 0.298  |
| AMDLQDVLK                       | 2176.4             | 3            | 4.665  | 0.4446 |
| AMDQKITVNPQFVQK                 | 1749.0             | 2            | 4.5915 | 0.3348 |
| AMDSDFWFAENYMR                  | 1693.8             | 2            | 3.6445 | 0.385  |
| AMDVYQK                         | 855.0              | 1            | 1.7267 | 0.1323 |
| AMEAEAAGLREQLLEEEAAR            | 2146.3             | 3            | 5.9064 | 0.331  |
| AMEEMNGKDLEGENIEIVFAKPPDQK      | 2934.3             | 3            | 4.367  | 0.295  |
| AMEGAGTDEK                      | 1009.1             | 2            | 3.0552 | 0.3346 |
| AMEGAGTDEKALIEILATR             | 1990.3             | 2            | 5.5621 | 0.376  |
| AMEGIFIKPSVEPSAGHDEL            | 2128.4             | 2            | 4.2977 | 0.4767 |
| AMELSFALVNGNNIR                 | 1649.9             | 3            | 3.3208 | 0.1823 |
| AMESHKDEFTIIPVLVGALSESKEQEFQK   | 3221.6             | 3            | 5.0783 | 0.4051 |
| AMEWITAK                        | 950.1              | 2            | 2.4712 | 0.105  |
| AMGAAQVVVTDLSATR                | 1590.8             | 2            | 2.8762 | 0.2146 |
| AMGDAAIKDGERLPLAVK              | 1914.2             | 2            | 4.5914 | 0.325  |
| AMGEQAVALAR                     | 1117.3             | 2            | 3.7057 | 0.2421 |
| AMGIMNSFVNDIFER                 | 1745.0             | 2            | 5.2488 | 0.5294 |
| AMGIMNSFVNDIFERIAGEASR          | 2429.8             | 3            | 4.0976 | 0.3118 |
| AMGNLQIDFADPSR                  | 1535.7             | 2            | 2.7454 | 0.1787 |
| AMGPLVLTEVLFNEK                 | 1662.0             | 2            | 4.5736 | 0.4031 |
| AMIAWYWTNFAK                    | 1316.6             | 2            | 3.8983 | 0.398  |
| AMINLHIQK                       | 1068.3             | 2            | 2.7345 | 0.1817 |
| AMINLHIQKDNPK                   | 1522.8             | 2            | 4.0505 | 0.2847 |
| AMKDEEKMEIQEMQLK                | 1982.3             | 2            | 6.0703 | 0.2682 |
| AMKDEEKMEIQEMQLK                | 1982.3             | 2            | 6.0641 | 0.2811 |
| AMKEYEEEEER                     | 1314.4             | 2            | 2.6869 | 0.2216 |
| AMKGFQGTDEQAIVDVVANR            | 2022.3             | 2            | 5.59   | 0.5336 |
| AMKGLGTDEDAIISVLAYR             | 2024.3             | 2            | 5.3269 | 0.5581 |
| AMKGLGTDEDTIIDITHR              | 2100.4             | 2            | 5.4972 | 0.5309 |
| AMKGLGTDEESILTLTISR             | 2036.3             | 2            | 5.1016 | 0.323  |
| AMLDAAHPEVR                     | 1139.3             | 2            | 3.2608 | 0.1776 |



| Peptide Sequence                     | Peptide mass (m/z) | Charge State | Xcorr  | DelCn2 |
|--------------------------------------|--------------------|--------------|--------|--------|
| AMLDQLMGTSR                          | 1223.4             | 2            | 3.2173 | 0.2719 |
| AMLLQGTESLNR                         | 1333.5             | 2            | 2.977  | 0.1166 |
| AMLSGPGQFAENETNEVNFR                 | 2212.4             | 2            | 5.6087 | 0.4883 |
| AMNGESLDGR                           | 1050.1             | 2            | 2.6824 | 0.2695 |
| AMNLHVGCLR                           | 1125.3             | 2            | 3.1099 | 0.309  |
| AMPLPEEVQILEENSDLIR                  | 2298.6             | 2            | 2.698  | 0.1709 |
| AMQAAGQIPATALLPTMTPDGLAVTPTVPVVGSMTR | 3791.5             | 3            | 5.4451 | 0.3699 |
| AMQDAEVSK                            | 979.1              | 1            | 2.2385 | 0.1697 |
| AMQDAEVSKSDIGEVILVGGMTR              | 2407.8             | 2            | 5.427  | 0.4397 |
| AMQGAGTQER                           | 1049.1             | 2            | 3.4163 | 0.2903 |
| AMQHAEVYYK                           | 1240.4             | 2            | 2.7952 | 0.3521 |
| AMQRPETAATLKR                        | 1473.7             | 3            | 3.3638 | 0.1461 |
| AMREENGLKYIEEAIEK                    | 2024.3             | 2            | 4.2003 | 0.2662 |
| AMSLVSNEGEGEQNEIR                    | 1864.0             | 2            | 4.7142 | 0.2997 |
| AMSRPILYSNWLSK                       | 1667.0             | 2            | 3.4648 | 0.3227 |
| AMSTTSISSPQPGK                       | 1392.6             | 2            | 3.1285 | 0.2643 |
| AMSVEQLTDVLMNEILHGADGTSIK            | 2674.0             | 3            | 3.7746 | 0.4034 |
| AMTILLEEAK                           | 1119.4             | 2            | 3.083  | 0.2134 |
| AMTKDNLLGK                           | 1205.4             | 2            | 3.0955 | 0.2503 |
| AMTKDNLLGR                           | 1233.4             | 2            | 3.2461 | 0.288  |
| AMTLQEAFAFVGAER                      | 1623.8             | 2            | 4.3035 | 0.3568 |
| AMTTGAIAAMLSTILYSR                   | 1872.2             | 2            | 3.2107 | 0.3709 |
| AMVASGSELGKK                         | 1178.4             | 2            | 3.1671 | 0.2965 |
| AMVDPAQTVQR                          | 1345.5             | 2            | 2.6969 | 0.1599 |
| AMVEAVQLIADGKAPR                     | 1670.0             | 2            | 2.9394 | 0.238  |
| AMVEEMQGHLKR                         | 1429.7             | 2            | 2.9881 | 0.2338 |
| AMVEYEIDLQKMPLGK                     | 1866.2             | 2            | 3.5697 | 0.2649 |
| AMVKNDDIQK                           | 1162.3             | 2            | 3.1503 | 0.1712 |
| AMVSNAQLDNEKTNFMYQVDTLKDMLELEEQLAESR | 4319.8             | 3            | 5.8863 | 0.4151 |
| AMYLPTLSPADQLK                       | 1663.9             | 2            | 3.3948 | 0.2412 |
| AMYTQAVQNIR                          | 1295.5             | 2            | 2.9228 | 0.2075 |
| ANAEMYSPSGKVPFIHVGNGVVSSELGPIVQFVK   | 3544.1             | 3            | 4.403  | 0.2538 |
| ANAGKPKDPTFIPAPIQAK                  | 1965.3             | 3            | 3.7629 | 0.192  |
| ANDHQHIR                             | 991.0              | 2            | 2.4273 | 0.1997 |
| ANDIEKAVQSLDKNGVDLLMK                | 2302.6             | 3            | 5.2725 | 0.364  |
| ANDTQEFNLSAYFER                      | 1805.9             | 2            | 4.4753 | 0.3715 |

| Peptide Sequence                   | Peptide mass (m/z) | Charge State | Xcorr  | DelCn2 |
|------------------------------------|--------------------|--------------|--------|--------|
| ANDTTFGLAAGVFTR                    | 1541.7             | 2            | 4.5812 | 0.4289 |
| ANEAMAIDTLLISDELFR                 | 2023.3             | 2            | 3.3131 | 0.1818 |
| ANEDELKRLDEELEDAAEKNLGESEIRDAMMAK  | 3694.0             | 3            | 4.1716 | 0.2402 |
| ANEFEFVLSQFKDFGVR                  | 2034.3             | 2            | 2.6594 | 0.1703 |
| ANEFLEVGK                          | 1007.1             | 2            | 2.5208 | 0.2233 |
| ANEFLEVGKK                         | 1135.3             | 2            | 2.4856 | 0.1215 |
| ANEFLEVGKKQPALDVLYDVMK             | 2508.9             | 3            | 4.7485 | 0.3663 |
| ANEQLTDELAQK                       | 1360.5             | 2            | 2.7598 | 0.2329 |
| ANEVEQMIRDLEASIR                   | 1946.2             | 3            | 4.4799 | 0.3009 |
| ANFDKESER                          | 1096.1             | 2            | 2.5093 | 0.1271 |
| ANFLNSNDVFLK                       | 1481.7             | 2            | 3.523  | 0.2591 |
| ANGEVIEIPTR                        | 1312.5             | 2            | 3.4832 | 0.1865 |
| ANGHLLLNSEK                        | 1196.3             | 2            | 3.7597 | 0.2433 |
| ANGQENGHVK                         | 1054.1             | 2            | 2.8271 | 0.2443 |
| ANGTTVHVGIHPSK                     | 1418.6             | 2            | 3.7943 | 0.415  |
| ANHEEVLAAGK                        | 1139.2             | 2            | 2.581  | 0.1978 |
| ANHFFTVDPR                         | 1305.4             | 2            | 2.9444 | 0.3938 |
| ANHFLILFR                          | 1131.4             | 2            | 2.9994 | 0.1264 |
| ANHGPGMAMNWPQFEESADLNR             | 2659.9             | 3            | 5.1919 | 0.3058 |
| ANHPHNVSQVVEAFIR                   | 1947.1             | 2            | 4.5088 | 0.4618 |
| ANHPMDAEVTK                        | 1213.3             | 2            | 3.2559 | 0.2738 |
| ANHS AFLFGFDGGGGPTQTMLDR           | 2454.7             | 3            | 6.1192 | 0.4559 |
| ANINIEKAFLTLAEDILR                 | 2045.4             | 2            | 4.4468 | 0.4259 |
| ANINVENAFFTLAR                     | 1580.8             | 2            | 5.2539 | 0.4653 |
| ANIPIMDTGENPEVPFPR                 | 1998.2             | 2            | 4.5928 | 0.4749 |
| ANIVAYHDSIMNPDYNVEFFR              | 2516.8             | 3            | 4.8826 | 0.3849 |
| ANKEFGDLSLEILQIIK                  | 2019.3             | 2            | 4.4694 | 0.4615 |
| ANKEFGDLSLEILQIIKESQQQHGLR         | 3083.4             | 3            | 6.042  | 0.5046 |
| ANKHQIRQAVK                        | 1293.5             | 2            | 2.5577 | 0.3194 |
| ANKITITNDKGR                       | 1331.5             | 2            | 3.5553 | 0.2605 |
| ANKLDHVVTIIK                       | 1351.6             | 2            | 3.2242 | 0.2421 |
| ANLEAFTVDKDITLTNDKPATAIGVIGNFTDAER | 3623.0             | 3            | 5.7805 | 0.4593 |
| ANLEKAQAELVGTADEATRAEIQIR          | 2699.0             | 3            | 4.1177 | 0.2838 |
| ANLPQSFQVDTSK                      | 1435.6             | 2            | 3.3081 | 0.3576 |
| ANLPQSFQVDTSKAGVAPLQVK             | 2299.6             | 2            | 5.1993 | 0.2985 |
| ANLQIDQINTDLNLER                   | 1871.0             | 2            | 5.9246 | 0.4697 |

| Peptide Sequence                   | Peptide mass (m/z) | Charge State | Xcorr  | DelCn2 |
|------------------------------------|--------------------|--------------|--------|--------|
| ANLQIDQINTDLNLERSHAQKNENAR         | 3007.2             | 3            | 4.4979 | 0.267  |
| ANLVFKEIEK                         | 1191.4             | 2            | 3.4541 | 0.2547 |
| ANLVFKEIEKKLEEEEGEQFVK             | 2508.9             | 3            | 5.1916 | 0.379  |
| ANLVFKEIEKKLEEEEGEQFVKK            | 2637.0             | 3            | 3.7532 | 0.3271 |
| ANMGVSREDVTFEDHPLNPNPDSR           | 2698.9             | 3            | 4.022  | 0.2672 |
| ANNHQQQQGLQDSSSK                   | 1770.8             | 2            | 4.3821 | 0.4043 |
| ANNLSSLSK                          | 934.0              | 2            | 3.1211 | 0.1639 |
| ANNSQEPSQLASSVASTR                 | 1945.0             | 2            | 3.9094 | 0.4468 |
| ANNSTYGLAAAVFTK                    | 1528.7             | 2            | 5.0152 | 0.5297 |
| ANNTFYGLSAGVFTK                    | 1590.8             | 2            | 5.305  | 0.5131 |
| ANPDLPIR                           | 1122.3             | 2            | 2.5106 | 0.245  |
| ANPDPNCCLGVFGLSLYTTER              | 2271.6             | 2            | 2.7926 | 0.1227 |
| ANPDPNTCLGVFGLSLYTTER              | 2269.5             | 2            | 4.8638 | 0.3739 |
| ANPFGGASHAK                        | 1057.1             | 1            | 2.5447 | 0.3168 |
| ANPQVGVAFPHIK                      | 1378.6             | 2            | 3.631  | 0.3109 |
| ANPVFDYQLYFQEPGVAEAELEQNLSR        | 3129.4             | 3            | 5.178  | 0.4266 |
| ANQAIQMACQSLGEPGCTQAQVLSAATIVAK    | 3104.6             | 3            | 3.8064 | 0.1833 |
| ANQHKEQQLGLK                       | 1394.6             | 2            | 2.7778 | 0.1416 |
| ANQHKEQQLGLKQQIESEVANLKK           | 2763.1             | 3            | 3.9273 | 0.2582 |
| ANQTKEGLPVALDKHILGFDTGDAVLNEAAQILR | 3620.1             | 3            | 6.5933 | 0.4467 |
| ANQTLKDEYDALQITFTALEGK             | 2470.7             | 3            | 3.7529 | 0.2405 |
| ANQVPGRPR                          | 995.1              | 2            | 2.6815 | 0.1928 |
| ANQYKENHNR                         | 1274.3             | 2            | 2.6436 | 0.2129 |
| ANSALTPPKPESGLTLQESNTPGLR          | 2579.8             | 3            | 4.6229 | 0.3368 |
| ANSEEFIPFANNPR                     | 1719.9             | 2            | 4.2318 | 0.3688 |
| ANSFTVSSVAAPSWLHR                  | 1831.0             | 3            | 4.4016 | 0.5032 |
| ANSNLVLQADR                        | 1201.3             | 2            | 3.7835 | 0.2937 |
| ANSSATETINK                        | 1136.2             | 2            | 3.5794 | 0.2195 |
| ANSSATETINKLK                      | 1377.5             | 2            | 2.9874 | 0.2383 |
| ANSTDYGLTAAVFTK                    | 1559.7             | 2            | 4.1181 | 0.3982 |
| ANSTEYGLASGVFTR                    | 1573.7             | 2            | 4.2612 | 0.3891 |
| ANSVFEDLSVTLR                      | 1451.6             | 2            | 3.8835 | 0.4325 |
| ANSVKQEFQDELKR                     | 1950.1             | 2            | 4.4909 | 0.3027 |
| ANTAYHLHQR                         | 1211.3             | 2            | 3.1973 | 0.1772 |
| ANTFVAELK                          | 993.1              | 2            | 2.7329 | 0.2898 |
| ANTFVAELKGLDPAR                    | 1602.8             | 2            | 4.0191 | 0.3909 |

| Peptide Sequence                     | Peptide mass (m/z) | Charge State | Xcorr  | DelCn2 |
|--------------------------------------|--------------------|--------------|--------|--------|
| ANTFVAELKGLDPARVNVVPVIGGHAGK         | 2732.1             | 3            | 5.1809 | 0.4781 |
| ANTNEVLWAVVAAFTK                     | 1735.0             | 3            | 3.4498 | 0.3542 |
| ANTTAFLTPLEIK                        | 1419.6             | 2            | 4.1977 | 0.2619 |
| ANTYEKYWPFYQK                        | 1738.9             | 3            | 3.6051 | 0.3191 |
| ANVAKAEAEK                           | 1031.1             | 2            | 2.9154 | 0.1737 |
| ANVAKAEAEKIKAALEAVGGTVVLE            | 2482.9             | 2            | 2.4322 | 0.2142 |
| ANVDKVFDDLMR                         | 1455.7             | 3            | 3.9259 | 0.3857 |
| ANVELDHATLVR                         | 1338.5             | 2            | 2.7386 | 0.3126 |
| ANVGAGKKPKE                          | 1099.3             | 2            | 2.7033 | 0.1501 |
| ANVLNKVEYAQQR                        | 1533.7             | 2            | 2.8011 | 0.1898 |
| ANVMSSQLHSLTHFSDISALTGGTVHLDEDQNPIKK | 3893.3             | 3            | 3.694  | 0.124  |
| ANWYFLLAR                            | 1154.3             | 2            | 2.896  | 0.3152 |
| ANYEQSKKDPHQTLPLDTPR                 | 2339.5             | 3            | 3.264  | 0.1145 |
| ANYLASPPLVIAYAIAGTIR                 | 2075.4             | 2            | 5.1329 | 0.4984 |
| APAAHPEGQLK                          | 1119.3             | 2            | 2.8194 | 0.2989 |
| APAEILNGKEISAQIR                     | 1711.0             | 2            | 4.7896 | 0.3647 |
| APAHHPAAISTAK                        | 1272.4             | 2            | 2.5087 | 0.2399 |
| APALGGSFAGLEPMGLLWALEPEKPLVR         | 2921.4             | 3            | 5.0115 | 0.2968 |
| APAPEAEDEEVAR                        | 1384.4             | 2            | 2.9043 | 0.3687 |
| APAQKAPAPK                           | 979.2              | 2            | 2.7533 | 0.1403 |
| APASVLPAAATPR                        | 1151.3             | 2            | 3.7759 | 0.4458 |
| APAVQGADNQR                          | 1127.2             | 2            | 3.1495 | 0.2319 |
| APDELHYTYLDTFGRPVIVAYK               | 2569.9             | 3            | 4.0766 | 0.2432 |
| APDELHYTYLDTFGRPVIVAYKK              | 2698.1             | 3            | 4.9098 | 0.461  |
| APDFVIFYAPR                          | 1183.3             | 2            | 3.988  | 0.4007 |
| APDGAALATAR                          | 1014.1             | 2            | 3.1205 | 0.3044 |
| APDGYIVK                             | 863.0              | 2            | 2.6554 | 0.2544 |
| APDLFPTDFKFDTPVDKLPQL                | 2405.7             | 3            | 4.6136 | 0.3762 |
| APDPGFQER                            | 1017.1             | 2            | 2.4129 | 0.2346 |
| APDVTTLPR                            | 970.1              | 2            | 2.7475 | 0.1829 |
| APEAWDYGQGFVNEEMIR                   | 2113.3             | 2            | 5.7212 | 0.474  |
| APEDAGPQPGSYEIR                      | 1587.7             | 2            | 3.8784 | 0.2764 |
| APEEHPVLLTEAPLNPK                    | 1856.1             | 2            | 4.5224 | 0.1309 |
| APEIMLNSK                            | 1003.2             | 2            | 2.7067 | 0.1948 |
| APEKKPLVK                            | 1010.3             | 2            | 2.7833 | 0.1186 |
| APELLFRPDLIGEESSEGIHEVLVFAIQK        | 3151.6             | 3            | 4.1359 | 0.3745 |

| Peptide Sequence                 | Peptide mass (m/z) | Charge State | Xcorr  | DelCn2 |
|----------------------------------|--------------------|--------------|--------|--------|
| APEPGPAGDGGPGAPAR                | 1474.6             | 2            | 3.4328 | 0.4623 |
| APEVSQYIQVYDSILKN                | 2131.4             | 2            | 6.2093 | 0.5219 |
| APFDLFENR                        | 1109.2             | 2            | 3.054  | 0.2059 |
| APFFPLYALQVDPSTGLLIAAGGGGAAK     | 2556.9             | 2            | 4.8112 | 0.4278 |
| APGAIGPYSQAVLVDR                 | 1614.8             | 2            | 3.9548 | 0.4122 |
| APGALLAAAGLADAATEIVER            | 1981.2             | 2            | 3.9014 | 0.4314 |
| APGFAHLAQLDK                     | 1197.4             | 2            | 2.6387 | 0.1152 |
| APGFAQMLK                        | 963.2              | 2            | 2.9842 | 0.2831 |
| APGFGDNR                         | 833.9              | 2            | 2.5588 | 0.351  |
| APGPASGGSGEVDLFDVK               | 1832.9             | 2            | 5.0342 | 0.4995 |
| APGPGLAQGLPQLHSLVLR              | 1925.3             | 3            | 4.1145 | 0.4154 |
| APGPQAGPGPGVR                    | 1161.3             | 2            | 3.2186 | 0.3842 |
| APGQLALFSVSDKTGLVEFAR            | 2207.5             | 2            | 5.606  | 0.5357 |
| APGTPHSHTK                       | 1033.1             | 2            | 2.8439 | 0.1379 |
| APGTPHSHTKPYVR                   | 1548.7             | 3            | 3.2444 | 0.3451 |
| APHLVGPLHGLETGNGGGVINLNAFDPTLPK  | 3107.5             | 3            | 6.0956 | 0.4937 |
| APHWTSAPLTEASAHSHPEIK            | 2365.6             | 2            | 4.8268 | 0.4289 |
| APHWTSAPLTEASAHSHPEIKDQGGAGEGLVR | 3405.7             | 3            | 4.0891 | 0.3368 |
| APHYPGIGPVDESGIPTAIR             | 2048.3             | 3            | 3.5251 | 0.2747 |
| APIIAVTR                         | 841.0              | 1            | 2.0476 | 0.2079 |
| APIKVGDAIPAVEVFEGEPGNKVNLAELFK   | 3153.6             | 3            | 6.1947 | 0.5071 |
| APIKVGDAIPAVEVFEGEPGNKVNLAELFKGK | 3338.8             | 3            | 5.155  | 0.3005 |
| APILIATDVASR                     | 1227.4             | 2            | 3.8054 | 0.3523 |
| APIRPDIVNFVHTNLR                 | 1863.2             | 3            | 5.2227 | 0.3175 |
| APIRPDIVNFVHTNLRK                | 1991.3             | 3            | 4.7614 | 0.3242 |
| APKDQVDIAVQELLQLK                | 1909.2             | 2            | 4.9275 | 0.4743 |
| APKPEDIDEEDDDVPDLVENFDEASKNEAN   | 3361.4             | 3            | 5.1836 | 0.2656 |
| APLATGEDDDDEVDPDLVENFDEASKNEAN   | 3121.1             | 3            | 3.7173 | 0.171  |
| APLDIPVPDPVKEK                   | 1518.8             | 2            | 3.5361 | 0.4011 |
| APLDIPVPDPVKEKEKEER              | 2190.5             | 3            | 3.2577 | 0.1089 |
| APLEPVYPGDNATPEQMAQYAADLR        | 2719.0             | 3            | 5.3521 | 0.415  |
| APLEVAQEH                        | 994.1              | 2            | 2.5371 | 0.1284 |
| APLNVQFNSPLPGDAVK                | 1768.0             | 2            | 4.1523 | 0.452  |
| APLPLGHIK                        | 946.2              | 2            | 2.7751 | 0.1871 |
| APLVCLPVFVSR                     | 1301.6             | 2            | 2.8884 | 0.2894 |
| APLVKVEEATVEER                   | 1570.8             | 2            | 4.5215 | 0.4933 |

| Peptide Sequence                                | Peptide mass (m/z) | Charge State | Xcorr  | DelCn2 |
|-------------------------------------------------|--------------------|--------------|--------|--------|
| APMVNPTLGVHEADLLK                               | 1806.1             | 2            | 3.2291 | 0.1102 |
| APNDFKLQDFNVGDYIEAVLDR                          | 2540.8             | 3            | 4.6079 | 0.5123 |
| APNDFKLQDFNVGDYIEAVLDRNLAENISR                  | 3438.7             | 3            | 4.3305 | 0.3604 |
| APPAPGPASGGSGEVDELFDVK                          | 2098.3             | 2            | 5.1366 | 0.4976 |
| APPGAPGPGPGSGAPGSQEEEEEPGLVEGDPGDGAIEDPELEAIKAR | 4535.8             | 3            | 4.197  | 0.3413 |
| APPGRPEAQPPPLSSEHKEPVAGDAVPGPK                  | 3014.3             | 3            | 5.9879 | 0.4514 |
| APPGRPEAQPPPLSSEHKEPVAGDAVPGPKDGSAPPEVR         | 3826.2             | 3            | 6.6885 | 0.4512 |
| APPHELTEEEKQQLHSEEFLSFFDHSTR                    | 3483.7             | 3            | 5.5108 | 0.4218 |
| APPQTHLPSGASSGTGSASATHGGGSPPGTR                 | 2786.9             | 3            | 5.0849 | 0.5687 |
| APPSVFAEVPQAQPVLVFK                             | 2025.4             | 2            | 5.895  | 0.5212 |
| APQAPLHSVVQQLHGK                                | 1711.0             | 2            | 3.2379 | 0.3751 |
| APQETYADIGGLDNQIQEIK                            | 2204.4             | 2            | 6.0854 | 0.407  |
| APQLLIAPFKEEDEWDSPHIVR                          | 2591.9             | 3            | 5.0499 | 0.3905 |
| APQLVGQFIAR                                     | 1200.4             | 2            | 2.843  | 0.196  |
| APQQQPPPQQPPPPQPPPPQPPPPPSYSPAR                 | 3330.7             | 3            | 3.9331 | 0.2606 |
| APQVLVLAPTR                                     | 1165.4             | 2            | 2.5048 | 0.199  |
| APREPAIHSEGQWVTLPAPLDTINVHLR                    | 3119.5             | 3            | 5.2962 | 0.3223 |
| APRPAPGGAEQR                                    | 1207.3             | 2            | 2.4304 | 0.2348 |
| APRPPKQPNVQDFQFFPPR                             | 2267.6             | 3            | 3.3933 | 0.2418 |
| APSEAEPAADLIDMGPDAATGNLSSQLAGMNLGSSSVR          | 3800.1             | 3            | 5.5328 | 0.5113 |
| APSHSESALNNSDK                                  | 1457.5             | 2            | 4.1913 | 0.3392 |
| APSIHGGSGGR                                     | 996.1              | 2            | 2.6066 | 0.2872 |
| APSIIFIDELDAIGTK                                | 1704.0             | 2            | 4.2381 | 0.468  |
| APSPLYSVEFSEEPFGVIVR                            | 2224.5             | 2            | 2.4858 | 0.249  |
| APSRQDVYGPQPQVR                                 | 1698.9             | 3            | 3.4086 | 0.2371 |
| APTEEGKCELLFLSNANPSLLER                         | 2557.9             | 3            | 4.4645 | 0.2894 |
| APTTDEDKKAEEK                                   | 1404.5             | 2            | 3.2021 | 0.3521 |
| APTTVEDR                                        | 888.9              | 1            | 1.8166 | 0.1514 |
| APTTVEDRVGDSTPVSEKPVSAAVDANASESP                | 3185.4             | 3            | 5.8259 | 0.4429 |
| APTVHGGAGGAR                                    | 1051.1             | 2            | 2.4345 | 0.2178 |
| APVAGTCYQAEWDDYVPK                              | 2014.2             | 2            | 6.0998 | 0.5179 |
| APVDFGYVVGIDSILEQMR                             | 2011.3             | 2            | 4.1564 | 0.4924 |
| APVIIIQSSVSPNAVIADLGLIR                         | 2444.9             | 3            | 4.0225 | 0.336  |
| APVILGSPDDVLEFLK                                | 1714.0             | 2            | 4.8131 | 0.4157 |
| APVILGSPDDVLEFLKVYEK                            | 2233.6             | 2            | 3.0522 | 0.2171 |
| APVIRPGGTLGLSEAADSDAHLFQDSTEPR                  | 3109.4             | 3            | 5.038  | 0.44   |

| Peptide Sequence                      | Peptide mass (m/z) | Charge State | Xcorr  | DelCn2 |
|---------------------------------------|--------------------|--------------|--------|--------|
| APVPASELLASGVLSR                      | 1567.8             | 3            | 3.2653 | 0.2546 |
| APVPGTPDSLSSGSSR                      | 1515.6             | 2            | 2.7374 | 0.3736 |
| APVPTGEVYFADSFDR                      | 1771.9             | 2            | 4.4782 | 0.4328 |
| APWIEQEGPEYWDGETR                     | 2064.2             | 2            | 5.6231 | 0.5025 |
| APWIEQEGPEYWDR                        | 1776.9             | 2            | 4.4486 | 0.3936 |
| APYFSGSSTFSPTILSSDKETIEIDLAK          | 3119.5             | 3            | 4.5462 | 0.3534 |
| APYYNYKDPAGHFHQVWYDNPQSISLK           | 3240.5             | 3            | 5.7399 | 0.4897 |
| AQAAAPASVPAQAPK                       | 1378.6             | 2            | 4.4363 | 0.3895 |
| AQAALAVNISAAR                         | 1256.4             | 2            | 3.4418 | 0.3501 |
| AQAALQAVSAVQSGSLALSGGPSNEGTVLPGQSPVLR | 3519.9             | 3            | 4.9961 | 0.438  |
| AQAELENVSGALNEAESK                    | 1861.0             | 2            | 5.4083 | 0.5211 |
| AQAELNALKR                            | 1114.3             | 2            | 2.6667 | 0.1263 |
| AQAELVGTADEATR                        | 1432.5             | 2            | 4.4421 | 0.4412 |
| AQAELVGTADEATRAEIQR                   | 2143.3             | 3            | 3.6012 | 0.192  |
| AQAGEGVRPSPMQLELR                     | 1840.1             | 3            | 3.3096 | 0.228  |
| AQALDRDGNLVEDFVFDAGVGDIGNR            | 2764.9             | 3            | 5.3002 | 0.3189 |
| AQALNEHLSTR                           | 1240.4             | 2            | 3.0351 | 0.3219 |
| AQALRDNSTMGYMAAK                      | 1729.0             | 2            | 3.3736 | 0.3412 |
| AQALRDNSTMGYMAAK                      | 1789.1             | 2            | 3.7648 | 0.4357 |
| AQAQTDRESLR                           | 1275.4             | 2            | 2.83   | 0.1347 |
| AQASEILLEELQQGLSQAK                   | 2057.3             | 2            | 2.6597 | 0.2112 |
| AQASEILLEELQQGLSQAKR                  | 2213.5             | 3            | 3.391  | 0.3354 |
| AQASSIPVGSR                           | 1073.2             | 2            | 2.6168 | 0.1623 |
| AQAVHPGYGFLSENKEFAR                   | 2122.3             | 2            | 4.8982 | 0.5246 |
| AQAVLEEDHYGMEDVKKR                    | 2119.3             | 3            | 4.6042 | 0.4187 |
| AQAVSEDAGGNEGR                        | 1361.4             | 2            | 4.6303 | 0.444  |
| AQAYQTGK                              | 866.9              | 1            | 1.9657 | 0.1838 |
| AQAYQTGKDISTNYYASQK                   | 2138.3             | 2            | 5.2831 | 0.4945 |
| AQAYQTGKDISTNYYASQKK                  | 2266.5             | 3            | 4.8598 | 0.4283 |
| AQDEIPALSVSRPQTGLSFLGPEPEDLEDLYSR     | 3631.9             | 3            | 8.2087 | 0.4799 |
| AQDFVQWLMNTK                          | 1481.7             | 2            | 4.4472 | 0.4118 |
| AQDFVQWLMNTKR                         | 1637.9             | 2            | 3.8356 | 0.302  |
| AQDGSHPLSLQDLIEK                      | 1751.9             | 2            | 3.6801 | 0.2528 |
| AQDGSHPLSLQDLIEKVILR                  | 2332.7             | 3            | 5.1467 | 0.3689 |
| AQDIEAGDGTTSVVIIAGSLLDSCTK            | 2565.8             | 2            | 5.037  | 0.3956 |
| AQDLSNLENTVAALKSEFQK                  | 2207.4             | 3            | 3.4105 | 0.1945 |

| Peptide Sequence                   | Peptide mass (m/z) | Charge State | Xcorr  | DelCn2 |
|------------------------------------|--------------------|--------------|--------|--------|
| AQDPSEVLTMLTNETGFEISSSDATVK        | 2872.1             | 3            | 4.6726 | 0.393  |
| AQDQTQDTQLITVDEKLDITTLTGVPEEHIK    | 3481.8             | 3            | 6.1419 | 0.4937 |
| AQEALDAVSTLEEGHAQYLTLADASALVAALTR  | 3487.8             | 3            | 5.1071 | 0.3877 |
| AQEALSHTEQSK                       | 1329.4             | 2            | 4.4433 | 0.3859 |
| AQEALSHTEQSKSELSSR                 | 1989.1             | 3            | 5.2417 | 0.476  |
| AQEALSHTEQSKSELSSRLDTLSAEKDALSGAVR | 3616.9             | 3            | 5.986  | 0.4864 |
| AQEAPGQAEPAAAAEVQGAGNENEPR         | 2589.7             | 3            | 5.8001 | 0.4601 |
| AQEEAEAEER                         | 1162.1             | 2            | 3.6212 | 0.2234 |
| AQEEAEAEERR                        | 1318.3             | 2            | 2.7986 | 0.1206 |
| AQEEAEAEERRLQEQEELENYIEHVLLR       | 3455.7             | 3            | 4.2793 | 0.3332 |
| AQEEAEAEERRLQEQEELENYIEHVLLRRP     | 3709.0             | 3            | 3.363  | 0.1557 |
| AQEEAERLEADRMAALR                  | 1960.2             | 2            | 2.9671 | 0.2249 |
| AQEIAMQNR                          | 1061.2             | 2            | 2.7871 | 0.2429 |
| AQEIDRSNEFK                        | 1337.4             | 2            | 3.2064 | 0.2088 |
| AQEIQDESAVLWLDEIQGGIWQSNKDTQEAQK   | 3659.9             | 3            | 3.3346 | 0.213  |
| AQEKVHEMEK                         | 1229.4             | 2            | 3.5005 | 0.2483 |
| AQELDALDNSHPIEVSVGHPSEVDEIFDAISYSK | 3714.0             | 3            | 7.3919 | 0.4917 |
| AQELEGKLNFLTK                      | 1491.7             | 2            | 4.0974 | 0.1568 |
| AQELGHSQSALASAQR                   | 1654.8             | 2            | 4.7798 | 0.4658 |
| AQELQKVQELQQQSAR                   | 1885.1             | 3            | 4.4453 | 0.3616 |
| AQENLNPLVVLNLFK                    | 1713.0             | 2            | 3.268  | 0.3941 |
| AQEQQQQMAELHSK                     | 1656.8             | 2            | 4.6452 | 0.3009 |
| AQFAEATQR                          | 1022.1             | 2            | 2.6206 | 0.251  |
| AQFAQPEILIGTIPGAGGTQR              | 2126.4             | 2            | 5.1903 | 0.3878 |
| AQFEGIVTDLIR                       | 1362.6             | 2            | 4.3241 | 0.3676 |
| AQGEKPLAGAK                        | 1070.2             | 2            | 2.9016 | 0.2414 |
| AQGEPVAGHESPKIPYEK                 | 1938.1             | 2            | 4.5539 | 0.4694 |
| AQGEPVAGHESPKIPYEKQQLPK            | 2532.8             | 3            | 4.1027 | 0.2606 |
| AQGGSSDSSLALHER                    | 1515.6             | 2            | 3.6227 | 0.3419 |
| AQGHEL GASR                        | 1026.1             | 2            | 3.1282 | 0.313  |
| AQGLLSAGHPEGEQIIR                  | 1777.0             | 2            | 3.6352 | 0.433  |
| AQGPAASAEKPKVEAPAANSQDTVTVKE       | 2894.1             | 3            | 6.0207 | 0.4589 |
| AQGPDGGLTASTYSYLGGFDSSTNVLGQLR     | 3091.3             | 3            | 3.3144 | 0.3129 |
| AQGWAPLKPLPPSAKDPAQAPQA            | 2340.7             | 3            | 3.3902 | 0.1488 |
| AQHEDQVEQYKK                       | 1503.6             | 2            | 4.4892 | 0.4218 |
| AQHEDQVEQYKKELEK                   | 2003.2             | 2            | 5.3803 | 0.4311 |



| Peptide Sequence                | Peptide mass (m/z) | Charge State | Xcorr  | DelCn2 |
|---------------------------------|--------------------|--------------|--------|--------|
| AQHEDQVEQYKKELEKTYSAK           | 2553.8             | 3            | 3.8663 | 0.3469 |
| AQHEENIKK                       | 1097.2             | 2            | 2.6162 | 0.1041 |
| AQHLSPAPGLAQPAAPAQASAAIPAAGK    | 2563.9             | 3            | 7.0054 | 0.5329 |
| AQHVFQHAVPQEGKPITNQK            | 2258.5             | 3            | 5.9106 | 0.4993 |
| AQIAGYLYGVSPDPNPQVK             | 2018.3             | 2            | 2.821  | 0.146  |
| AQIFANTVDNAR                    | 1320.4             | 2            | 4.3646 | 0.3821 |
| AQIHEQNPSVEVVYYNK               | 2019.2             | 3            | 4.9703 | 0.3691 |
| AQILAGGR                        | 785.9              | 1            | 2.0149 | 0.1604 |
| AQIQQFHSQIAAQTSAVLAEELHK        | 2737.0             | 3            | 4.0628 | 0.3148 |
| AQISDDTTHPISYYKPEFYTPDDGG       | 2818.9             | 3            | 5.2979 | 0.4261 |
| AQIWDTAGQER                     | 1275.4             | 2            | 3.4625 | 0.2248 |
| AQKDEEKMEIQEIQLK                | 1961.2             | 2            | 5.8356 | 0.2926 |
| AQKDEEKMEIQEIQLKEAK             | 2289.6             | 3            | 3.5946 | 0.1038 |
| AQKLADDLSTLQEK                  | 1560.7             | 2            | 2.8365 | 0.3278 |
| AQLADSFHLQQFFR                  | 1708.9             | 2            | 4.6553 | 0.4465 |
| AQLAKAEDGHAVAK                  | 1409.6             | 2            | 4.2925 | 0.2963 |
| AQLDAAVTFGPSQVAR                | 1631.8             | 2            | 4.9592 | 0.4695 |
| AQLDPAFIKTYEDIKENLESR           | 2481.7             | 3            | 4.3705 | 0.3895 |
| AQLDYVDLYLIHSPMSLKPGEELSPTDENGK | 3461.8             | 3            | 4.0818 | 0.2826 |
| AQLELEVSK                       | 1017.2             | 2            | 2.7853 | 0.1432 |
| AQLELEVSKAQQLAEVEVKK            | 2241.6             | 3            | 4.2744 | 0.2085 |
| AQLELEVSKAQQLAEVEVKKFK          | 2516.9             | 3            | 3.5199 | 0.1098 |
| AQLEPVASPAKKPK                  | 1464.7             | 2            | 2.9498 | 0.2074 |
| AQLEVQASQHR                     | 1267.4             | 2            | 3.4784 | 0.2503 |
| AQLFALTGVQPAR                   | 1372.6             | 2            | 3.9909 | 0.3445 |
| AQLGGPEAAK                      | 942.1              | 1            | 2.7651 | 0.2543 |
| AQLGGPEAAKSDETAAK               | 1644.8             | 2            | 5.0348 | 0.5059 |
| AQLGPDESKQK                     | 1201.3             | 2            | 3.0088 | 0.1565 |
| AQLGRKEEELQAALAR                | 1784.0             | 3            | 4.4826 | 0.3045 |
| AQLGVQAFADALLIIPK               | 1769.1             | 2            | 4.8723 | 0.3789 |
| AQLHDTNMELTDLK                  | 1629.8             | 2            | 3.1013 | 0.1508 |
| AQLHDTNMELTDLKLQLEK             | 2241.6             | 3            | 4.8082 | 0.3232 |
| AQLHQLQLHAAVLR                  | 1598.9             | 2            | 4.7815 | 0.4865 |
| AQLHVQGLLHEAGSTDDRIVVPQR        | 2640.9             | 3            | 4.1259 | 0.3972 |
| AQLLELEKEFLFNK                  | 1723.0             | 2            | 3.5603 | 0.3138 |
| AQLLQPTLEINPR                   | 1493.7             | 2            | 3.5196 | 0.3315 |

| Peptide Sequence               | Peptide mass (m/z) | Charge State | Xcorr  | DelCn2 |
|--------------------------------|--------------------|--------------|--------|--------|
| AQLMAEQEK                      | 1048.2             | 2            | 2.5841 | 0.1311 |
| AQLNIGNVLPVGTMPGIVCCLEEKPGDR   | 3155.7             | 3            | 4.1265 | 0.2649 |
| AQLNIGNVLPVGTMPGIVCCLEEKPGDRGK | 3340.9             | 3            | 3.7473 | 0.1749 |
| AQMALWTVLAAPLLMSTDLR           | 2202.7             | 2            | 2.566  | 0.1078 |
| AQMKNPILER                     | 1200.4             | 2            | 2.8238 | 0.1796 |
| AQMSEDNHLSNTVR                 | 1602.7             | 2            | 4.6117 | 0.4457 |
| AQMVQEDLEK                     | 1191.3             | 2            | 3.0892 | 0.1806 |
| AQMVQEDLEKTR                   | 1448.6             | 2            | 2.5514 | 0.2015 |
| AQMVQEDLEKTRAEK                | 1890.2             | 3            | 3.4548 | 0.2226 |
| AQNLIWNIKDELK                  | 1829.1             | 2            | 4.4117 | 0.2859 |
| AQNKPFYVVAESFK                 | 1628.9             | 2            | 2.8152 | 0.1131 |
| AQNVTLAILQNATSDNPVQLSAVQAAR    | 3023.3             | 3            | 5.5454 | 0.4194 |
| AQPAQPADEPAEKADPEMEH           | 2162.3             | 2            | 4.4326 | 0.2173 |
| AQPFVAAANIDDKR                 | 1516.7             | 2            | 3.4592 | 0.3231 |
| AQPLSLEELLAK                   | 1312.5             | 2            | 2.6072 | 0.1649 |
| AQPPEAGPQGLHDLGR               | 1643.8             | 2            | 3.2163 | 0.3886 |
| AQPSASLGVGYR                   | 1206.3             | 2            | 3.4022 | 0.3279 |
| AQPSVSLGAAAYR                  | 1220.4             | 2            | 2.9753 | 0.418  |
| AQPVQVAEGSEPDGFWEALGGK         | 2273.4             | 2            | 6.8918 | 0.5339 |
| AQQATPGGAAPTIFSR               | 1573.7             | 2            | 4.5756 | 0.5336 |
| AQQEAEAAQR                     | 1102.1             | 2            | 3.3351 | 0.2426 |
| AQQEFAAGVFSNPAVR               | 1692.9             | 2            | 4.5662 | 0.4865 |
| AQQEFATGVMSNK                  | 1411.6             | 2            | 4.1403 | 0.3319 |
| AQQEHQSLEK                     | 1311.4             | 2            | 2.7109 | 0.2362 |
| AQQEQELAADAFK                  | 1449.5             | 2            | 3.8581 | 0.4044 |
| AQQEVLQALEPQVDYLR              | 2001.2             | 2            | 4.4458 | 0.4597 |
| AQQGIVFLDEVKIGSVPGIHQLR        | 2621.0             | 3            | 4.6535 | 0.4357 |
| AQQLAEVEVK                     | 1115.3             | 2            | 2.9348 | 0.2082 |
| AQQLAEVEVKK                    | 1243.4             | 2            | 3.6952 | 0.2688 |
| AQQLREEQQR                     | 1286.4             | 2            | 2.5815 | 0.1235 |
| AQQNNVEHK                      | 1068.1             | 2            | 2.6191 | 0.1609 |
| AQQNNVEHKVETFSGVYK             | 2079.3             | 2            | 5.5832 | 0.4569 |
| AQQNNVEHKVETFSGVYKK            | 2207.4             | 2            | 5.1977 | 0.4541 |
| AQQSLELIQSK                    | 1245.4             | 2            | 2.7098 | 0.1607 |
| AQQVAVQEIEARR                  | 1626.8             | 2            | 2.843  | 0.1946 |
| AQSALHEQK                      | 1012.1             | 2            | 2.7895 | 0.2743 |

| Peptide Sequence              | Peptide mass (m/z) | Charge State | Xcorr  | DelCn2 |
|-------------------------------|--------------------|--------------|--------|--------|
| AQSEAEKLAK                    | 1075.2             | 2            | 2.6482 | 0.197  |
| AQSEAEKLAKERQEAEAKEALLQASR    | 3015.3             | 3            | 6.927  | 0.5162 |
| AQSELAAHQK                    | 1083.2             | 2            | 3.0077 | 0.2112 |
| AQSELAAHQKK                   | 1211.4             | 2            | 2.7618 | 0.2608 |
| AQSHSFPNYGLSHGLTSR            | 1960.1             | 3            | 5.1589 | 0.539  |
| AQSLLSTDREASIDILHSIVK         | 2297.6             | 3            | 5.7467 | 0.4454 |
| AQSLLSTDREASIDILHSIVKR        | 2453.8             | 3            | 5.8181 | 0.3886 |
| AQSSQDAVSSMNLFDLGGQYLR        | 2388.6             | 2            | 5.0908 | 0.4114 |
| AQSVSQINHKLEAQLVDLKSELTETQAEK | 3239.6             | 3            | 4.0704 | 0.1673 |
| AQTEGINISEEALNHLGEIGTK        | 2325.5             | 2            | 4.6064 | 0.4062 |
| AQTGSGGADPTTDSVSGQS           | 1636.6             | 2            | 2.5212 | 0.2115 |
| AQTKAPPKPAR                   | 1165.4             | 2            | 2.7289 | 0.2192 |
| AQTLPTSVVTITSESSPGKR          | 2060.3             | 2            | 4.2167 | 0.5204 |
| AQTMSNSGIK                    | 1037.2             | 2            | 2.4734 | 0.2334 |
| AQTTNSNSSSSSDVSTHS            | 1797.7             | 2            | 2.9088 | 0.3189 |
| AQVARPGGDTIFGK                | 1417.6             | 2            | 3.4155 | 0.3184 |
| AQVEQELTTLR                   | 1288.4             | 2            | 2.5117 | 0.1826 |
| AQVLAGGR                      | 771.9              | 1            | 1.9163 | 0.1736 |
| AQVPFEQILSLPELK               | 1713.0             | 2            | 3.8027 | 0.2815 |
| AQVSGQSAR                     | 904.0              | 2            | 2.4444 | 0.1403 |
| AQVTELEDELTAEDA               | 1833.9             | 2            | 4.5022 | 0.3603 |
| AQVTSLLGELQESQSR              | 1746.9             | 2            | 3.1171 | 0.2024 |
| AQVVDLLQQELTAAEQR             | 1913.1             | 3            | 5.5001 | 0.3707 |
| AQYEDIANR                     | 1080.1             | 2            | 3.128  | 0.282  |
| AQYEEIAQR                     | 1108.2             | 2            | 3.2202 | 0.1035 |
| AQYQDKLAR                     | 1093.2             | 2            | 2.428  | 0.1733 |
| AQYYLPDGSSTIEIGPSR            | 1868.0             | 2            | 5.3796 | 0.4488 |
| ARAEAEQMAK                    | 1105.3             | 2            | 2.9851 | 0.232  |
| ARAEAQEAEDQQAR                | 1573.6             | 2            | 5.1169 | 0.3531 |
| ARAEAEAQKR                    | 1259.4             | 3            | 3.3261 | 0.2033 |
| ARAETEELIR                    | 1188.3             | 2            | 2.9387 | 0.1021 |
| ARAHGLEVEPSALEQGFR            | 1968.2             | 3            | 4.7751 | 0.4099 |
| ARDAILDALENLTAELKK            | 2114.4             | 3            | 5.04   | 0.3248 |
| ARDDLITDLLNEAK                | 1587.8             | 2            | 4.5299 | 0.3536 |
| ARDDLITDLLNEAKQR              | 1872.1             | 3            | 5.4565 | 0.3473 |
| ARDDTKEWLIEVPGNADPLEDQFAKR    | 3015.3             | 3            | 3.9027 | 0.1861 |

| Peptide Sequence                  | Peptide mass (m/z) | Charge State | Xcorr  | DelCn2 |
|-----------------------------------|--------------------|--------------|--------|--------|
| ARDHGLLIYHIPQVEPR                 | 2015.3             | 3            | 3.767  | 0.3549 |
| ARDINAVLIDMER                     | 1516.7             | 2            | 3.2755 | 0.2317 |
| ARDIVPGDIVEVAVGDKVPADIR           | 2405.7             | 3            | 6.4751 | 0.3586 |
| ARDSLIQSLATQLELDGFER              | 2263.5             | 3            | 5.2911 | 0.4255 |
| ARDYDAMGSQTK                      | 1343.4             | 2            | 3.3952 | 0.3587 |
| AREEAEAEVASLNR                    | 1545.6             | 2            | 5.3944 | 0.352  |
| AREEESESSTSDDKR                   | 1855.8             | 3            | 4.7403 | 0.4256 |
| AREETDKEEPASK                     | 1490.6             | 2            | 3.6067 | 0.3852 |
| AREQAEAEVASLNRR                   | 1700.8             | 3            | 3.7285 | 0.2044 |
| AREQEELLAPADGTVELVR               | 2097.3             | 2            | 4.6213 | 0.322  |
| ARETYGLPNTLPTAWHNLVYR             | 2473.8             | 3            | 3.8385 | 0.204  |
| ARFEELCSDLFR                      | 1486.7             | 2            | 3.6513 | 0.2898 |
| ARFEELNADLFR                      | 1481.6             | 2            | 4.1355 | 0.3066 |
| ARFEELNADLFRGTLDPVEK              | 2321.6             | 2            | 2.7599 | 0.1818 |
| ARFEEVLSK                         | 1079.2             | 2            | 2.4588 | 0.1024 |
| ARGDLGAFSR                        | 1050.2             | 2            | 2.5481 | 0.2084 |
| ARGDSEALDEES                      | 1279.3             | 2            | 2.8859 | 0.1781 |
| ARHEVLLISAEQDKR                   | 1766.0             | 3            | 5.2081 | 0.366  |
| ARIVAEFLK                         | 1176.4             | 2            | 2.415  | 0.1186 |
| ARKEALLVEKERSAKITSLPPPPPTLFENIEVK | 3703.3             | 3            | 3.2381 | 0.1271 |
| ARKYTLVSYGTGELER                  | 1844.1             | 2            | 2.7261 | 0.1212 |
| ARLEIEPEWAYGK                     | 1562.8             | 2            | 3.7576 | 0.3208 |
| ARLEIEPEWAYGKK                    | 1690.9             | 2            | 4.1934 | 0.3494 |
| ARNDEYENLFNMIVEIPR                | 2224.5             | 3            | 3.9536 | 0.357  |
| ARPAEVGGMQLR                      | 1285.5             | 2            | 2.7477 | 0.1841 |
| ARPATVLGAMEMGR                    | 1460.8             | 2            | 3.132  | 0.3365 |
| ARPEDVISEGR                       | 1229.3             | 2            | 2.8327 | 0.1171 |
| ARPEYMLPVHIFYGR                   | 1737.0             | 3            | 4.2273 | 0.3579 |
| ARPPFDGLAEDIDKGEVSAR              | 2144.3             | 3            | 6.8115 | 0.4969 |
| ARPPFDGLAEDIDKGEVSARQELK          | 2642.9             | 3            | 4.8525 | 0.2862 |
| ARNIPVYR                          | 1086.3             | 2            | 2.4723 | 0.1878 |
| ARPTDYPTQEQLHFIR                  | 2101.3             | 3            | 5.0376 | 0.3932 |
| ARPTLSSGLPEEPDQNLSSPEEVFHSR       | 3375.6             | 3            | 5.6312 | 0.4127 |
| ARPVQIAVYHMLYK                    | 1690.0             | 3            | 3.3524 | 0.1783 |
| ARPVSSAASVYAGAGGSGSR              | 1808.9             | 2            | 5.7687 | 0.5191 |
| ARQEELYSELQAR                     | 1593.7             | 2            | 4.2877 | 0.2533 |

| Peptide Sequence                     | Peptide mass (m/z) | Charge State | Xcorr  | DelCn2 |
|--------------------------------------|--------------------|--------------|--------|--------|
| ARQEQQLQLINNQLREEDDKWQDDLAR          | 3226.5             | 3            | 3.4442 | 0.1219 |
| ARQLLDQVEQIQKEQDYQR                  | 2389.6             | 3            | 4.9425 | 0.2964 |
| ARQNALLFAEEEDGEAGAED                 | 2136.2             | 2            | 6.0389 | 0.5788 |
| ARQNLSQVPEADSVSFLQELLALR             | 2686.0             | 3            | 3.9995 | 0.31   |
| ARQYTSPEEIDAQLQAEKQK                 | 2334.5             | 3            | 6.0314 | 0.306  |
| ARRDHFSIERAQQEAPAVRKLSSKGSFADLGLLEPR | 3925.4             | 3            | 3.4767 | 0.1662 |
| ARRPESALLGGSEAGER                    | 1756.9             | 3            | 4.6152 | 0.3951 |
| ARSDEGQLSPATR                        | 1388.5             | 2            | 3.4547 | 0.2641 |
| ARVADLVAGRRQHGQR                     | 1791.0             | 2            | 2.7029 | 0.2309 |
| ARVDHGAEIITQSPGR                     | 1707.9             | 3            | 3.8918 | 0.3324 |
| ARVEENFLK                            | 1106.3             | 2            | 2.7339 | 0.1318 |
| ARVEKVESPAK                          | 1214.4             | 2            | 3.1702 | 0.2061 |
| ARVITEEEKNFK                         | 1464.6             | 2            | 3.6151 | 0.2021 |
| ARVVFGPELVSLGPPEEQFTVLSLSAGRPK       | 3085.5             | 3            | 4.0514 | 0.241  |
| ASAAAAAAAAAAAAAAK                    | 1229.4             | 2            | 4.9925 | 0.3628 |
| ASAAFSSVGSVITK                       | 1325.5             | 2            | 4.7545 | 0.4822 |
| ASAAPKPEPVPVQK                       | 1419.7             | 2            | 3.1651 | 0.2823 |
| ASAELALGENSEVLK                      | 1531.7             | 2            | 4.5335 | 0.2285 |
| ASAELALGENSEVLKSGR                   | 1832.0             | 2            | 3.7069 | 0.385  |
| ASAELEEEVAKLLK                       | 1643.9             | 2            | 4.3874 | 0.2548 |
| ASAFALQEQPVVNAVIDDTTK                | 2218.4             | 2            | 3.5963 | 0.1406 |
| ASAGHAVSIAQDDAGADDWETDPDFVNDVSEK     | 3334.4             | 3            | 6.5397 | 0.4562 |
| ASAGHAVSIAQDDAGADDWETDPDFVNDVSEKEQR  | 3747.8             | 3            | 7.5945 | 0.5597 |
| ASALIDRPAPYFER                       | 1606.8             | 2            | 3.2108 | 0.2279 |
| ASALRHEEQPAPGYDTHGR                  | 2093.2             | 3            | 4.5498 | 0.4439 |
| ASANMDLMR                            | 1009.2             | 2            | 2.6023 | 0.3189 |
| ASAPAPGHH                            | 844.9              | 1            | 1.8529 | 0.2722 |
| ASASGSGAQVGGPISSGSSASSVTVTR          | 2366.5             | 3            | 5.8866 | 0.5526 |
| ASASSTNLKDILADLIPK                   | 1858.1             | 3            | 5.2978 | 0.338  |
| ASASSTNLKDILADLIPKEQAR               | 2342.6             | 3            | 6.4245 | 0.3859 |
| ASDEVPLAPR                           | 1055.2             | 2            | 2.626  | 0.199  |
| ASDGSFSLPLKPVISQPIHDSKSPGASNLK       | 3079.5             | 3            | 3.8029 | 0.243  |
| ASDPASPHIGR                          | 1108.2             | 2            | 2.9651 | 0.3141 |
| ASDPDEAKLAEDILNTMFDTSYSK             | 2662.9             | 2            | 5.0829 | 0.4774 |
| ASDSPIDLFYGDFFGDISEAVIQK             | 2635.9             | 3            | 5.6173 | 0.5159 |
| ASDVHEVR                             | 913.0              | 2            | 2.4102 | 0.129  |

| Peptide Sequence                      | Peptide mass (m/z) | Charge State | Xcorr  | DelCn2 |
|---------------------------------------|--------------------|--------------|--------|--------|
| ASDVHEVRK                             | 1041.1             | 2            | 2.4528 | 0.1025 |
| ASDVHEVRKVLGEK                        | 1567.8             | 2            | 2.9604 | 0.2508 |
| ASDVVLGFAELEGYLQK                     | 1840.1             | 2            | 2.7927 | 0.2226 |
| ASDVVLGFAELEGYLQKQPYFGAVIGR           | 2929.3             | 3            | 6.3039 | 0.4312 |
| ASDYGMKLPILR                          | 1364.6             | 2            | 3.1841 | 0.3469 |
| ASEAASPLPDSPGDKLVIVK                  | 1995.3             | 2            | 2.8628 | 0.2242 |
| ASEAKEGEEAGPGDPLLEAVPK                | 2195.4             | 3            | 4.0133 | 0.2511 |
| ASEAKEGEEAGPGDPLLEAVPKTGDEKDVS        | 3126.3             | 3            | 5.1376 | 0.3778 |
| ASEDTTSGSPPKK                         | 1305.4             | 2            | 2.7035 | 0.1738 |
| ASEEAFVKESKEETPGTEWEK                 | 2412.5             | 3            | 5.2391 | 0.2986 |
| ASEEDHTNAACFACILLSHGEENVIYK           | 3023.3             | 3            | 4.102  | 0.2748 |
| ASEEHLKQHYIDLK                        | 1711.9             | 2            | 3.8872 | 0.2975 |
| ASEEHLKQHYIDLKDRPFFPGLVK              | 2869.3             | 3            | 5.1721 | 0.4049 |
| ASEGPAFFPGR                           | 1136.2             | 2            | 2.7548 | 0.2494 |
| ASEHKDQLSR                            | 1171.2             | 2            | 2.4431 | 0.1445 |
| ASEIKEAEAK                            | 1076.2             | 2            | 2.4294 | 0.1088 |
| ASEKLDYITYLSIFDQLFDIPKER              | 2906.3             | 3            | 3.4169 | 0.1742 |
| ASELHLLLETPLVVKK                      | 1678.0             | 3            | 3.7163 | 0.376  |
| ASELPVSEVASILQADLQNLN                 | 2397.7             | 3            | 4.1786 | 0.2725 |
| ASEPGLAQLLVLDQIYENAMIAAGLVDDPR        | 3071.5             | 3            | 4.5132 | 0.2153 |
| ASEPGLAQLLVLDQIYENAMIAAGLVDDPRAMVGR   | 3586.1             | 3            | 3.8596 | 0.3692 |
| ASESSKPWPDATYGTGSASR                  | 2056.1             | 3            | 4.5803 | 0.3442 |
| ASEWVQQVSGLMDGK                       | 1635.8             | 2            | 4.4719 | 0.5304 |
| ASFANEDGQVSPGSLLLAGAIAGMPAASLVTPADVIK | 3541.0             | 3            | 4.6927 | 0.4201 |
| ASFEEASNQLINHIEQFLDTNETPYFMK          | 3318.6             | 3            | 3.739  | 0.3093 |
| ASFNHFDKDHGGALGPEEFK                  | 2204.3             | 3            | 5.295  | 0.4113 |
| ASFNHFDKDRHSGTLGPEEFK                 | 2292.4             | 3            | 4.2994 | 0.3286 |
| ASGANFEYIIAEK                         | 1413.6             | 2            | 4.3142 | 0.4237 |
| ASGANYSFHK                            | 1082.2             | 2            | 2.9832 | 0.2361 |
| ASGATILSTLANLEGEETFEAAMLGQAEEVVQER    | 3566.9             | 3            | 3.8192 | 0.1273 |
| ASGDENDNIEIDTNEEIPGFFVGGGDEL          | 3036.1             | 3            | 5.1378 | 0.1566 |
| ASGDFQTTK                             | 955.0              | 2            | 2.6855 | 0.2692 |
| ASGDFQTTKLNQFEVVFAR                   | 1989.2             | 3            | 3.3593 | 0.109  |
| ASGDGESLDEDEFTLASDFEIGHFFR            | 2980.1             | 3            | 3.5436 | 0.1494 |
| ASGDSARPVLLQVAESAYR                   | 1991.2             | 3            | 3.2989 | 0.1728 |
| ASGGGVPTDEEQATGLER                    | 1774.8             | 2            | 4.8854 | 0.4909 |

| Peptide Sequence                  | Peptide mass (m/z) | Charge State | Xcorr  | DelCn2 |
|-----------------------------------|--------------------|--------------|--------|--------|
| ASGGTSEFITGKDR                    | 1426.5             | 2            | 3.4428 | 0.3659 |
| ASGNLETK                          | 819.9              | 2            | 2.9027 | 0.1865 |
| ASGNYATVISHNPETK                  | 1689.8             | 2            | 5.0325 | 0.4554 |
| ASGNYATVISHNPETKK                 | 1818.0             | 2            | 4.3339 | 0.3833 |
| ASGPGLNTTGVPASLPVEFTIDAK          | 2343.6             | 2            | 5.0995 | 0.4826 |
| ASGPPVSELITK                      | 1199.4             | 1            | 3.252  | 0.402  |
| ASGTNDKPGGPHYILR                  | 1683.8             | 2            | 3.1087 | 0.1779 |
| ASGVDIEEETKLNLEKVQTIIEHLQEK       | 3111.4             | 3            | 3.6078 | 0.1062 |
| ASGYQSSQK                         | 956.0              | 2            | 2.8885 | 0.3386 |
| ASGYQSSQKK                        | 1084.2             | 2            | 2.6614 | 0.1671 |
| ASHEEVEGLVEK                      | 1327.4             | 2            | 4.1341 | 0.4182 |
| ASHEEVEGLVEKIR                    | 1596.8             | 3            | 4.4546 | 0.4036 |
| ASHPEDPASVVEAR                    | 1465.6             | 2            | 3.2609 | 0.2896 |
| ASHSTSQLSQK                       | 1174.2             | 2            | 2.842  | 0.3169 |
| ASHTAPQVLFSHR                     | 1451.6             | 3            | 4.1658 | 0.4511 |
| ASHTAPQVLFSHREPPLELK              | 2258.6             | 2            | 3.4439 | 0.1131 |
| ASHTLLPSHR                        | 1119.3             | 2            | 2.6616 | 0.3117 |
| ASIHEAWTDGKEAMLK                  | 1788.0             | 2            | 4.1368 | 0.4073 |
| ASIKKGEDFVK                       | 1222.4             | 2            | 2.4026 | 0.2402 |
| ASIPFSVVGSNQLIEAK                 | 1761.0             | 2            | 4.3065 | 0.3678 |
| ASITALEAK                         | 904.0              | 2            | 3.1064 | 0.2148 |
| ASITALEAKIAQLEEQLDNETKER          | 2702.0             | 3            | 6.5584 | 0.4747 |
| ASITPGTILILTGR                    | 1526.8             | 2            | 4.4007 | 0.3713 |
| ASKELVER                          | 932.1              | 1            | 2.1021 | 0.169  |
| ASKLQNELDNVSTLLEEAEK              | 2232.4             | 2            | 3.38   | 0.3294 |
| ASKLQNELDNVSTLLEEAEKK             | 2360.6             | 3            | 5.4907 | 0.5104 |
| ASKLQNELDNVSTLLEEAEKKGIK          | 2659.0             | 3            | 5.6888 | 0.4874 |
| ASKPLPPAPAPDEYLVSPITGEKIPASK      | 2875.3             | 3            | 4.8757 | 0.3835 |
| ASKSEVLSESSELLQQELEEELRK          | 2633.9             | 3            | 4.8791 | 0.2478 |
| ASLAETDKITLIVAK                   | 1589.8             | 2            | 4.475  | 0.4267 |
| ASLASLPPLHVAK                     | 1304.6             | 2            | 3.1561 | 0.3008 |
| ASLDRPFTNLESAFYISIVGLSSLGAQVPDAK  | 3255.6             | 3            | 4.1536 | 0.4345 |
| ASLDRPFTNLESAFYISIVGLSSLGAQVPDAKK | 3383.8             | 3            | 6.3614 | 0.4931 |
| ASLDSAGGSGSSPILLPTPVVGGPR         | 2293.6             | 2            | 5.365  | 0.4718 |
| ASLEAAIADAEQR                     | 1345.4             | 2            | 4.9064 | 0.3193 |
| ASLEAAIADAEQRGELAIK               | 1957.2             | 2            | 5.5076 | 0.343  |

| Peptide Sequence                    | Peptide mass (m/z) | Charge State | Xcorr  | DelCn2 |
|-------------------------------------|--------------------|--------------|--------|--------|
| ASLEAAIADAEQRGELAIKDANAK            | 2456.7             | 3            | 5.9338 | 0.4299 |
| ASLEAAIADAEQRGELAIKDANAKLSELEAALQR  | 3567.9             | 3            | 7.9901 | 0.4373 |
| ASLEDAPVDDLTR                       | 1402.5             | 2            | 3.1574 | 0.1778 |
| ASLEDAPVDDLTRK                      | 1530.7             | 2            | 2.9759 | 0.1435 |
| ASLEDLGWADWVLSPR                    | 1816.0             | 2            | 3.6849 | 0.203  |
| ASLEPPDGPSAGQATGPGEGR               | 2081.1             | 2            | 3.932  | 0.3928 |
| ASLENSLR                            | 890.0              | 1            | 2.8671 | 0.2114 |
| ASLENSLREVEAR                       | 1474.6             | 2            | 3.0649 | 0.1489 |
| ASLHALVGSPIIWGGEPK                  | 1861.1             | 2            | 4.0243 | 0.3572 |
| ASLHGGEPTTIIRQDLGSPEGIAVDHLGR       | 2998.3             | 3            | 4.7075 | 0.3874 |
| ASLIDDAFALAR                        | 1263.4             | 2            | 2.5246 | 0.25   |
| ASLISAVSDKLR                        | 1260.5             | 2            | 3.1064 | 0.3104 |
| ASLLGDMHFR                          | 1147.3             | 2            | 2.8958 | 0.2289 |
| ASLLHSMPTHSSPR                      | 1521.7             | 2            | 3.0101 | 0.4107 |
| ASLLQNESTNEQLQIHYK                  | 2117.3             | 3            | 3.6014 | 0.3016 |
| ASLLTDEEDVDMALDQR                   | 1922.1             | 2            | 2.6831 | 0.1516 |
| ASLLTGLPQHQNGLYGLHGDVHHFNSFDK       | 3293.6             | 3            | 4.9838 | 0.353  |
| ASLLTGLPQHQNGLYGLHGDVHHFNSFDKVR     | 3548.9             | 3            | 3.9248 | 0.1862 |
| ASLPTGEGSISHEEQK                    | 1670.8             | 2            | 4.3676 | 0.3768 |
| ASLSKLGDVYVNDAFGTAHR                | 2122.3             | 3            | 5.7696 | 0.5221 |
| ASLTLGGGPSALAFDLSK                  | 1736.0             | 2            | 3.3684 | 0.205  |
| ASLVALPEQTASEEETPPPLLTK             | 2422.7             | 3            | 4.0147 | 0.3518 |
| ASLVHVGSRPYTEFPFGQHSSGEEAAQDAVR     | 3202.4             | 3            | 7.1503 | 0.4888 |
| ASMHPVTAMLVGK                       | 1342.7             | 3            | 4.0041 | 0.3872 |
| ASMHPVTAMLVGKDLKVD                  | 1913.3             | 3            | 3.6287 | 0.3277 |
| ASMMYLENGTPDTAAMALER                | 2173.5             | 2            | 4.6992 | 0.4218 |
| ASMQQQQQLASAR                       | 1447.6             | 2            | 4.3409 | 0.3905 |
| ASNAMMNNNDLVR                       | 1450.6             | 2            | 3.7385 | 0.3504 |
| ASNDMYHSR                           | 1081.1             | 2            | 3.1309 | 0.3245 |
| ASNEDGDIKR                          | 1105.1             | 2            | 3.3376 | 0.3015 |
| ASNGDAWVEAHGK                       | 1342.4             | 2            | 4.0579 | 0.4829 |
| ASNGDAWVEAHGKLYSPSQIGAFVLMK         | 2878.3             | 3            | 5.9743 | 0.4233 |
| ASNKVQDSAPVETPR                     | 1599.7             | 2            | 4.276  | 0.3382 |
| ASNLENSTYDLYTIPK                    | 1830.0             | 2            | 5.0591 | 0.4127 |
| ASNLENSTYDLYTIPKDADSQNPDAPEGKR      | 3311.5             | 3            | 4.3415 | 0.2196 |
| ASNPFLPGGGPATGPSVTNPFQPAPPATLTLNQLR | 3487.9             | 3            | 5.7559 | 0.3982 |



| Peptide Sequence                        | Peptide mass (m/z) | Charge State | Xcorr  | DelCn2 |
|-----------------------------------------|--------------------|--------------|--------|--------|
| ASNTADTLFQEVLGR                         | 1622.8             | 2            | 3.2821 | 0.2647 |
| ASNTAEVFFDGVR                           | 1413.5             | 2            | 3.8934 | 0.3507 |
| ASNTAEVFFDGVRVPSENVLGEVGSQFK            | 2914.2             | 3            | 6.1778 | 0.5043 |
| ASNTAEVFFDGVRVPSENVLGEVGSQFKVAMHILNNGR  | 4020.5             | 3            | 4.6383 | 0.3149 |
| ASPALVAKDPGTVANKKEEEDLAK                | 2482.8             | 3            | 5.3137 | 0.5023 |
| ASPALVAKDPGTVANKKEEEDLAKAIELSLKEQR      | 3651.1             | 3            | 4.8944 | 0.3905 |
| ASPAPGSGHPEGPGAHLDMNSLDRAQAAK           | 2841.1             | 3            | 3.5204 | 0.3133 |
| ASPATQPPPLPPSATGPDATVGGPAPTPLLPPSATASVK | 3729.2             | 3            | 3.379  | 0.2171 |
| ASPDDPSGLPGRSPDT                        | 1569.6             | 2            | 2.5691 | 0.1378 |
| ASPDQNASTHTPQSSVK                       | 1755.8             | 2            | 3.753  | 0.3505 |
| ASPESQEPLIQLVQAFVR                      | 2013.3             | 2            | 5.0845 | 0.4745 |
| ASPGHSPHYFAASSPTSPNALPPAR               | 2518.7             | 3            | 3.9299 | 0.1084 |
| ASPGHSPHYFAASSPTSPNALPPARK              | 2646.9             | 3            | 3.4717 | 0.2264 |
| ASPHATPSTLHFPTSPIIQPGPYFSHPAIR          | 3354.8             | 3            | 4.823  | 0.3808 |
| ASPNVEAPQPHR                            | 1303.4             | 2            | 3.3197 | 0.4167 |
| ASPSPQPSSQPLQIHR                        | 1730.9             | 2            | 4.3819 | 0.4373 |
| ASPSTAGETPSGVK                          | 1289.4             | 2            | 2.5997 | 0.2455 |
| ASPTSDFASPTYDLIK                        | 1713.9             | 2            | 3.3963 | 0.2235 |
| ASQGPVYK                                | 850.0              | 2            | 2.5285 | 0.156  |
| ASQKDFENSMNQVK                          | 1626.8             | 2            | 4.2548 | 0.3789 |
| ASQKPQPNFSPPEYMIFDHEFTK                 | 2740.0             | 3            | 5.5646 | 0.475  |
| ASQSTQAHENSR                            | 1316.3             | 2            | 3.4974 | 0.3717 |
| ASRDEIFAQSK                             | 1252.4             | 2            | 3.1826 | 0.2022 |
| ASREEILAQAKENEK                         | 1716.9             | 2            | 4.9054 | 0.3022 |
| ASREEILAQAKENEKK                        | 1845.0             | 2            | 4.6335 | 0.2324 |
| ASSDASKVTSK                             | 1081.2             | 2            | 3.2417 | 0.3888 |
| ASSEGGTAAGAGLDSLHK                      | 1629.7             | 2            | 4.5855 | 0.4862 |
| ASSEGGTAAGAGLDSLHKNSVSIQSVLSGGK         | 2887.1             | 3            | 5.8913 | 0.5295 |
| ASSHSSQTQGGGSVTK                        | 1519.6             | 2            | 4.8744 | 0.4201 |
| ASSHSSQTQGGGSVTKK                       | 1647.7             | 2            | 3.8417 | 0.3928 |
| ASSIIDELFQDR                            | 1394.5             | 2            | 4.1188 | 0.3894 |
| ASSQKEKEDKPAETK                         | 1676.8             | 2            | 3.7237 | 0.3063 |
| ASSQKEKEDKPAETKK                        | 1804.9             | 3            | 3.7343 | 0.3707 |
| ASSRLENLGIPEEELLRQQQELFAK               | 2900.2             | 3            | 5.0691 | 0.4015 |
| ASSSGSASKSDKDLETQVIQLNEQVHSLK           | 3088.3             | 3            | 7.0365 | 0.3599 |
| ASSTSPVEISEWLDQK                        | 1777.9             | 2            | 4.7214 | 0.3775 |

| Peptide Sequence            | Peptide mass (m/z) | Charge State | Xcorr  | DelCn2 |
|-----------------------------|--------------------|--------------|--------|--------|
| ASSTSPVEISEWLDQKLTk         | 2120.3             | 2            | 3.2147 | 0.3345 |
| ASSVSLHAER                  | 1057.1             | 2            | 2.4037 | 0.107  |
| ASTALSNEQQAR                | 1276.3             | 2            | 3.443  | 0.3086 |
| ASTEGVAIQGQQGTR             | 1503.6             | 2            | 3.6598 | 0.3249 |
| ASTKVEVDMKAESLQVTR          | 2122.4             | 3            | 3.5233 | 0.2574 |
| ASTLLRDEELEEEIKKETGFSHSQITR | 3019.3             | 3            | 6.9156 | 0.4341 |
| ASTNAMLISAGLPPLK            | 1584.9             | 2            | 2.8252 | 0.2028 |
| ASTNSETNRGESEK              | 1510.5             | 2            | 3.0512 | 0.2349 |
| ASTPAILFLDEIDSILGAR         | 2003.3             | 2            | 3.7417 | 0.3325 |
| ASTYGVAVR                   | 924.0              | 2            | 2.6306 | 0.3514 |
| ASVDSGSSEEQGGSSR            | 1540.5             | 2            | 4.781  | 0.5405 |
| ASVDTKEAEGAPQVEAGK          | 1787.9             | 2            | 5.4621 | 0.375  |
| ASVDTKEAEGAPQVEAGKR         | 1944.1             | 2            | 5.5983 | 0.3872 |
| ASVDTKEAEGAPQVEAGKRLEELR    | 2584.8             | 3            | 4.9129 | 0.3389 |
| ASVEDADTQSK                 | 1151.2             | 2            | 2.7824 | 0.3524 |
| ASVEDADTQSKVHQLYETIQR       | 2419.6             | 3            | 4.703  | 0.3874 |
| ASVITQVFHVPLEER             | 1726.0             | 2            | 3.6735 | 0.2595 |
| ASVITQVFHVPLEERK            | 1854.1             | 3            | 4.2587 | 0.408  |
| ASVLFDTMQHHLALNR            | 1854.1             | 2            | 4.835  | 0.3521 |
| ASVSPMDEPVPDSESPIEK         | 2015.2             | 2            | 3.4071 | 0.2388 |
| ASVSQVEADLK                 | 1147.3             | 2            | 2.9807 | 0.2384 |
| ASVTNDSGPR                  | 1004.0             | 2            | 2.7269 | 0.1776 |
| ASVVTLPVYLNFR               | 1580.9             | 2            | 2.9842 | 0.1511 |
| ASWGEFQAR                   | 1052.1             | 2            | 3.161  | 0.2154 |
| ASWSSLSMDEK                 | 1241.4             | 2            | 3.0559 | 0.3452 |
| ASWSSLSMDEKVELYR            | 1902.1             | 3            | 3.2845 | 0.3787 |
| ASYGHSMVVDPWGTVVAR          | 1933.2             | 2            | 4.2179 | 0.3508 |
| ASYGVEDPEYAVTQLAQTTMR       | 2331.5             | 2            | 5.3277 | 0.4742 |
| ASYHFSPEELDENTSPLLGDAR      | 2449.6             | 3            | 4.5247 | 0.3374 |
| ASYISSAR                    | 854.9              | 1            | 2.7067 | 0.1861 |
| ASYISSARLEQPDGAVAAAAAILR    | 2428.7             | 3            | 4.0362 | 0.3308 |
| ASYLEIYQEEIRDLLSKDQTK       | 2543.8             | 3            | 3.6824 | 0.1702 |
| ASYVAPLTAQPATYR             | 1609.8             | 2            | 3.5472 | 0.2868 |
| ATAAELLKHPFLAK              | 1510.8             | 2            | 4.1944 | 0.3348 |
| ATAAFILANEHNVALFK           | 1831.1             | 2            | 2.4198 | 0.1822 |
| ATAAGVKQTESTSFLEK           | 1768.9             | 3            | 3.3997 | 0.3098 |

| Peptide Sequence                      | Peptide mass (m/z) | Charge State | Xcorr  | DelCn2 |
|---------------------------------------|--------------------|--------------|--------|--------|
| ATAAPAGAPPQPQDLEFTKLPNGLVIASLENYSPVSR | 3822.3             | 3            | 5.1191 | 0.5076 |
| ATAEQISSQTGNK                         | 1335.4             | 2            | 4.8134 | 0.3007 |
| ATAGAYIASQTVK                         | 1281.4             | 2            | 4.068  | 0.3126 |
| ATAGDTHLGGEDFDNR                      | 1676.7             | 2            | 4.8522 | 0.4795 |
| ATAGDTHLGGEDFDNRLVNHFVEEFK            | 2920.1             | 3            | 4.5091 | 0.4074 |
| ATAGDTHLGGEDFDNRLVNHFVEEFKR           | 3076.3             | 3            | 4.9964 | 0.4476 |
| ATAGDTHLGGEDFDNRLVNHFVEEFKRK          | 3204.5             | 3            | 3.9585 | 0.3153 |
| ATAPQTQHVSPMR                         | 1424.6             | 2            | 3.4162 | 0.3953 |
| ATAVMPDGQFK                           | 1165.3             | 2            | 2.8724 | 0.3445 |
| ATAVVDGAFK                            | 979.1              | 1            | 2.7772 | 0.2938 |
| ATAVVDGAFKEVK                         | 1335.5             | 2            | 3.4959 | 0.3146 |
| ATCAPQHGAPGPGPADASK                   | 1733.9             | 2            | 4.5967 | 0.4579 |
| ATDAEADVASLNR                         | 1333.4             | 2            | 3.7928 | 0.2897 |
| ATDAMAHVAGFTVAHDVSAR                  | 2028.2             | 3            | 3.8559 | 0.3269 |
| ATDFVADR                              | 895.0              | 2            | 2.9551 | 0.2707 |
| ATDFVADRAGTFK                         | 1399.5             | 2            | 3.0344 | 0.3238 |
| ATDFVVPGPGK                           | 1088.2             | 2            | 2.9715 | 0.3109 |
| ATDFVVPGPGKVEITYTPSDGTQK              | 2508.8             | 3            | 4.977  | 0.335  |
| ATDKDITGTLNPEVFNYGVETHEAYK            | 3001.2             | 3            | 4.6432 | 0.2735 |
| ATDKSFVEK                             | 1025.1             | 2            | 2.6779 | 0.2853 |
| ATDKTFVEKLVQEQQSHSK                   | 2133.3             | 2            | 4.6872 | 0.3367 |
| ATDLGGTSQAGTSQR                       | 1450.5             | 2            | 4.5227 | 0.4099 |
| ATDLRPIYISVQPPSLHVLEQR                | 2533.9             | 3            | 4.5897 | 0.4019 |
| ATDSSDPLKPYQDFIIDSREPDATTR            | 2940.1             | 3            | 3.7777 | 0.1603 |
| ATDVMIAGK                             | 906.1              | 2            | 2.7295 | 0.2363 |
| ATEKDKVEIYK                           | 1324.5             | 2            | 2.9846 | 0.2275 |
| ATEKFQLAVEALEQEKGQLQSQIAQVLEGR        | 3343.7             | 3            | 5.7248 | 0.4069 |
| ATEKQHITLALEK                         | 1482.7             | 2            | 4.1054 | 0.2662 |
| ATENDIANFFSPLNPIR                     | 1920.1             | 2            | 5.2064 | 0.4914 |
| ATENDIYNFFSPLNPMR                     | 2030.2             | 2            | 5.3737 | 0.4675 |
| ATENDIYNFFSPLNPVR                     | 1998.2             | 3            | 5.2217 | 0.4295 |
| ATENPEQVASEGLPEPVLR                   | 2037.2             | 3            | 4.7285 | 0.4058 |
| ATEPVIAFYEK                           | 1268.4             | 2            | 2.4858 | 0.2638 |
| ATEQEKAAMDSAR                         | 1408.5             | 2            | 3.9299 | 0.4397 |
| ATESGAQSAPLPMEGVDISPK                 | 2086.3             | 3            | 3.3357 | 0.1236 |
| ATEVSKTPEAR                           | 1189.3             | 2            | 2.7731 | 0.1737 |

| Peptide Sequence                        | Peptide mass (m/z) | Charge State | Xcorr  | DelCn2 |
|-----------------------------------------|--------------------|--------------|--------|--------|
| ATFDAISK                                | 853.0              | 2            | 2.4306 | 0.1923 |
| ATFDAISKTYSLTPDLWK                      | 2221.5             | 2            | 4.6003 | 0.4169 |
| ATFDAISKTYSLTPDLWKETVFTK                | 2927.3             | 3            | 4.4772 | 0.2104 |
| ATFDISLVVPK                             | 1190.4             | 2            | 2.8591 | 0.1821 |
| ATFDPDTGLLMEIMNMNQQLLPVR                | 2862.4             | 2            | 4.1994 | 0.4096 |
| ATFIKVPQNGK                             | 1445.6             | 2            | 4.0097 | 0.1914 |
| ATFLDAWEAMEELVDEGLVK                    | 2267.5             | 3            | 5.3116 | 0.4438 |
| ATFSDSLLIQPTSAGSTDRLPYSK                | 2556.8             | 3            | 3.333  | 0.2159 |
| ATFYGEQVDYYK                            | 1484.6             | 2            | 3.8527 | 0.4162 |
| ATFYLLIGNANAAPDLDKVISLK                 | 2577.0             | 3            | 4.1602 | 0.3549 |
| ATFYLVLEQK                              | 1326.5             | 2            | 3.5723 | 0.1862 |
| ATGASKKLLKATGASKKSVKTPKKAKKPAATRKSSKNPK | 4038.8             | 3            | 3.6457 | 0.2013 |
| ATGATQQDANASSLLDIYSFWLK                 | 2501.7             | 2            | 2.9547 | 0.1198 |
| ATGDETGAVER                             | 1234.3             | 2            | 3.3825 | 0.3726 |
| ATGDETVKVER                             | 1262.4             | 2            | 2.6342 | 0.1544 |
| ATGEADVEFVTHEDAVAAMSK                   | 2179.4             | 2            | 3.1853 | 0.128  |
| ATGGGLSSVGGGSSTIK                       | 1436.6             | 2            | 3.7203 | 0.4143 |
| ATGQSHKVPPTQVQK                         | 1703.9             | 2            | 4.2384 | 0.3337 |
| ATGYLELSNWPEVAPDPSVR                    | 2202.4             | 2            | 2.8043 | 0.3189 |
| ATHAVVR                                 | 753.9              | 1            | 1.7523 | 0.1586 |
| ATHDGAPELGAGGTR                         | 1410.5             | 2            | 3.8058 | 0.456  |
| ATHGGRIDYIAGLDSR                        | 1702.9             | 3            | 3.6621 | 0.2712 |
| ATHVVQSEVDKYVDDIMKEK                    | 2335.6             | 3            | 3.9578 | 0.2578 |
| ATIAGGGVIPHIHK                          | 1371.6             | 2            | 4.4952 | 0.4689 |
| ATIERDGYAQILR                           | 1506.7             | 3            | 4.3103 | 0.3123 |
| ATIRPWSTFVDQQR                          | 1705.9             | 2            | 3.4677 | 0.1854 |
| ATKEQLKAVMDDFAAFVEK                     | 2142.5             | 2            | 5.5389 | 0.4459 |
| ATKKEPAVLELEGK                          | 1513.8             | 3            | 4.0692 | 0.3447 |
| ATKKEPAVLELEGKK                         | 1641.9             | 3            | 3.7138 | 0.284  |
| ATKQELLQLR                              | 1200.4             | 2            | 3.1169 | 0.1721 |
| ATKSPEEGAETPVYLALLPPDAEGPHGQFVSEK       | 3466.8             | 3            | 5.4825 | 0.4246 |
| ATKSPEEGAETPVYLALLPPDAEGPHGQFVSEKR      | 3623.0             | 3            | 4.0844 | 0.2211 |
| ATKVPLVAEKPLKEPK                        | 1749.1             | 2            | 4.5012 | 0.3008 |
| ATLENITNLRPVGEDFR                       | 1946.2             | 2            | 3.1243 | 0.1914 |
| ATLEQDSAKKEQQLQER                       | 2003.2             | 3            | 5.3137 | 0.3536 |
| ATLGPTPTTPPQPPDPSQPPPGPMQH              | 2644.9             | 3            | 3.4658 | 0.359  |

| Peptide Sequence                              | Peptide mass (m/z) | Charge State | Xcorr  | DelCn2 |
|-----------------------------------------------|--------------------|--------------|--------|--------|
| ATLPDADKER                                    | 1116.2             | 2            | 2.5126 | 0.2305 |
| ATLPSPDKLPGFK                                 | 1371.6             | 2            | 2.7342 | 0.2355 |
| ATLSEDKKHILNGSK                               | 1805.0             | 2            | 4.559  | 0.3119 |
| ATLSQMLSDLTLQLR                               | 1691.0             | 2            | 4.3301 | 0.2099 |
| ATMDAGKLVSEMVVELIEK                           | 2179.5             | 2            | 2.9108 | 0.185  |
| ATMEAYSR                                      | 929.0              | 2            | 2.4496 | 0.3284 |
| ATMQNLNDR                                     | 1063.2             | 2            | 2.5881 | 0.1561 |
| ATNDSVVADK                                    | 1020.1             | 2            | 2.7462 | 0.3171 |
| ATNIEVLSNTFQFTNEAR                            | 2056.2             | 2            | 3.6013 | 0.3855 |
| ATNMTVSAIR                                    | 1064.2             | 2            | 3.3526 | 0.1882 |
| ATNVTYQAAHVSR                                 | 1484.6             | 2            | 3.8473 | 0.4192 |
| ATNVVMNYSEIESK                                | 1585.8             | 2            | 3.0119 | 0.1863 |
| ATNYNAGDR                                     | 982.0              | 2            | 2.6479 | 0.1199 |
| ATNYNAGDRSTDYGIFQINSR                         | 2364.5             | 3            | 4.3264 | 0.382  |
| ATPEEKLEDFAR                                  | 1795.0             | 2            | 3.6728 | 0.3464 |
| ATPENYLFQGR                                   | 1296.4             | 2            | 2.8947 | 0.305  |
| ATPEQYQILKENYGQK                              | 1911.1             | 2            | 4.3626 | 0.3547 |
| ATPEQYQILKENYGQKEAEKVAR                       | 2695.0             | 3            | 3.8067 | 0.4493 |
| ATPMPSRPSTTPFDKKPTSAPKPSSTTPR                 | 3086.5             | 3            | 5.4558 | 0.2278 |
| ATPPQIVNGDQYCGDYELFVEAVEQNTLQEFK              | 3761.1             | 3            | 4.8512 | 0.2902 |
| ATPSENLPSSAR                                  | 1329.4             | 2            | 3.5427 | 0.4214 |
| ATQASQEY                                      | 897.9              | 2            | 2.5504 | 0.1021 |
| ATQSDTVKLEVDQELSNQFK                          | 2325.5             | 3            | 3.9481 | 0.3221 |
| ATQELIPIEDFITPLK                              | 1829.1             | 2            | 3.4607 | 0.3257 |
| ATQLLKEAEEEFWYR                               | 1914.1             | 3            | 4.7704 | 0.3383 |
| ATQPETTEEVDLKR                                | 1718.8             | 2            | 3.4949 | 0.2641 |
| ATQQPFDVSAFNASYSDSGLFGIYTISQATAAGDVIK         | 3843.2             | 3            | 5.3822 | 0.3716 |
| ATQQPFDVSAFNASYSDSGLFGIYTISQATAAGDVIKAAAYNQVK | 4618.0             | 3            | 4.3329 | 0.3546 |
| ATQQQHDFTLTQTADGR                             | 1919.0             | 2            | 5.0809 | 0.4321 |
| ATRPDDPLSLLDPLWTLNKT                          | 2354.6             | 3            | 4.3749 | 0.2279 |
| ATSEIFHSQSFLATGSNLRK                          | 2195.4             | 3            | 4.3634 | 0.2942 |
| ATSETLAADPTPAATIVHFK                          | 2042.3             | 2            | 3.2228 | 0.3113 |
| ATSFATVVKDIEGFMEENQTK                         | 2346.6             | 3            | 4.9439 | 0.2534 |
| ATSFLLALEPELEAR                               | 1660.9             | 2            | 5.0348 | 0.3894 |
| ATSGDKLNNK                                    | 1162.2             | 2            | 2.8814 | 0.2542 |
| ATSHVGEIEQELALAR                              | 1724.9             | 2            | 2.7197 | 0.2678 |

| Peptide Sequence                        | Peptide mass (m/z) | Charge State | Xcorr  | DelCn2 |
|-----------------------------------------|--------------------|--------------|--------|--------|
| ATSLGRPEEEDELAHR                        | 1940.0             | 3            | 3.4346 | 0.1354 |
| ATSLTLEGGRLKR                           | 1402.6             | 2            | 2.4436 | 0.1195 |
| ATSNVFMFDQSQIQEFKEAFNMIDQNR             | 3311.7             | 3            | 3.5418 | 0.141  |
| ATSPADALQYLLQFAR                        | 1766.0             | 2            | 4.0365 | 0.3773 |
| ATSQGGDLMSDLFNK                         | 1584.7             | 2            | 2.786  | 0.1825 |
| ATSSSSGSLSATGR                          | 1269.3             | 2            | 3.9232 | 0.4569 |
| ATSTATSGFAGAIGQK                        | 1468.6             | 2            | 4.3796 | 0.3685 |
| ATTAALLLEAQAATGFLVDPVR                  | 2229.6             | 2            | 3.0398 | 0.3724 |
| ATTADGSSILDR                            | 1207.3             | 2            | 2.8063 | 0.1769 |
| ATTLNAVSSLASTGLSLTK                     | 1923.2             | 2            | 4.4465 | 0.4595 |
| ATTPVIMVGPVGTGVAPFIGFIQER               | 2459.9             | 3            | 3.928  | 0.2557 |
| ATVAFAASEGHSHPR                         | 1609.7             | 2            | 3.9882 | 0.5055 |
| ATVASSTQK                               | 893.0              | 2            | 2.5949 | 0.1665 |
| ATVDNKDKLEETSGLK                        | 1748.9             | 2            | 4.9976 | 0.3528 |
| ATVEDEKLQGK                             | 1218.3             | 2            | 2.6693 | 0.1331 |
| ATVHDPETGKLTTAQYR                       | 1889.1             | 2            | 4.0255 | 0.377  |
| ATVKELASLHGTK                           | 1355.6             | 2            | 3.5371 | 0.389  |
| ATVLESEGTRESAINVAEGK                    | 2062.2             | 2            | 4.6103 | 0.2829 |
| ATVLESEGTRESAINVAEGKK                   | 2190.4             | 3            | 5.5484 | 0.4184 |
| ATVLQKTSFTPVGDFELNFMNVK                 | 2687.1             | 3            | 3.3185 | 0.1239 |
| ATVNLLGEEKK                             | 1202.4             | 2            | 2.6701 | 0.2481 |
| ATVNQDTR                                | 904.9              | 2            | 2.4474 | 0.1965 |
| ATVQSVLLDSAGK                           | 1289.5             | 2            | 3.4373 | 0.3069 |
| ATVSKTENQK                              | 1106.2             | 2            | 2.6662 | 0.19   |
| ATVTPSPVK                               | 900.1              | 1            | 1.7552 | 0.1441 |
| ATVVESSEK                               | 950.0              | 2            | 2.4084 | 0.1262 |
| ATVVYQGER                               | 1023.1             | 2            | 2.9252 | 0.1777 |
| ATWLHQALR                               | 1096.3             | 2            | 2.4736 | 0.1283 |
| AVAAAAAAVTPAAIAAATTTLAQEEPVAAPEPK       | 3116.5             | 3            | 3.4287 | 0.1553 |
| AVAALLTIPEAEKSPMLSEFQSQISSNPELAAIFESIQK | 4190.8             | 3            | 5.2782 | 0.4785 |
| AVAASKER                                | 831.9              | 2            | 2.7238 | 0.1772 |
| AVAATSTKGQEQAQK                         | 1605.7             | 2            | 3.0438 | 0.3093 |
| AVADTRDQADGSR                           | 1362.4             | 2            | 2.6908 | 0.1587 |
| AVAEGKADQFLVGTSR                        | 1649.8             | 2            | 4.825  | 0.4549 |
| AVAEIEEMCNILK                           | 1463.7             | 2            | 3.1759 | 0.1375 |
| AVAEQIPLLQGVV                           | 1493.8             | 2            | 3.9174 | 0.3468 |

| Peptide Sequence                          | Peptide mass (m/z) | Charge State | Xcorr  | DelCn2 |
|-------------------------------------------|--------------------|--------------|--------|--------|
| AVAEQVLHSQSR                              | 1325.5             | 2            | 3.4228 | 0.3217 |
| AVAFQNPQTHVIENLHAAAYR                     | 2351.6             | 3            | 6.1557 | 0.4497 |
| AVAFSPVTELKKDTEFEHR                       | 2191.4             | 3            | 3.5222 | 0.202  |
| AVAGDASESALLK                             | 1232.4             | 2            | 3.8098 | 0.3686 |
| AVAGEYSDPVTLETK                           | 1580.7             | 2            | 3.0849 | 0.2103 |
| AVAGNISDPGLQK                             | 1270.4             | 2            | 2.9349 | 0.2827 |
| AVAGQGELTR                                | 1002.1             | 2            | 2.4808 | 0.1259 |
| AVAHHTDCTFIR                              | 1371.6             | 2            | 2.6349 | 0.2592 |
| AVAHHTTAAFIR                              | 1295.5             | 2            | 3.5207 | 0.3803 |
| AVAILDPLGLGHSK                            | 1278.5             | 2            | 3.7185 | 0.2745 |
| AVALDEAISQSTQFHDKIDQILESLESLER            | 3058.3             | 3            | 5.0909 | 0.4617 |
| AVANETGAFFFLINGPEIMSK                     | 2257.6             | 2            | 6.077  | 0.5306 |
| AVANQTSATFLR                              | 1279.4             | 2            | 3.1808 | 0.3914 |
| AVANSRPAK                                 | 914.0              | 2            | 2.8693 | 0.2195 |
| AVANYDSVEEGEKVVK                          | 1737.9             | 2            | 4.5193 | 0.4489 |
| AVAPSIIFDELDAVER                          | 2077.4             | 2            | 4.0217 | 0.3911 |
| AVAQALEVIPR                               | 1167.4             | 2            | 3.5327 | 0.2892 |
| AVAREESGKPGAHVTVK                         | 1737.0             | 2            | 3.8169 | 0.3038 |
| AVASAAAALVLK                              | 1085.3             | 2            | 2.7443 | 0.1652 |
| AVASLNTPFIPANPNMSPLESIK                   | 2412.8             | 2            | 2.9924 | 0.1996 |
| AVASLSVKLEQAMKEIQR                        | 2002.4             | 2            | 2.7963 | 0.2254 |
| AVASPEATVSQTDENKAR                        | 1875.0             | 2            | 3.969  | 0.4186 |
| AVASQPDSVDAAER                            | 1416.5             | 2            | 3.6916 | 0.2542 |
| AVATGKMDENQFVAVTSTNAAK                    | 2254.5             | 3            | 5.2929 | 0.3586 |
| AVAVVVDPIQSVK                             | 1325.6             | 2            | 3.3674 | 0.331  |
| AVAVVVDPIQSVK GK                          | 1510.8             | 2            | 3.4583 | 0.1793 |
| AVCVLKGDPVQGIINFEQK                       | 2116.5             | 2            | 5.2958 | 0.4502 |
| AVCVLKGDPVQGIINFEQKESNGPVK                | 2828.2             | 3            | 4.2509 | 0.2012 |
| AVCVLKGDPVQGIINFEQKESNGPVKVVWGSIK         | 3499.0             | 3            | 3.725  | 0.1832 |
| AVDDGVNTFK                                | 1066.1             | 2            | 3.4324 | 0.3238 |
| AVDEAVILLQEIGVLDQR                        | 1982.3             | 2            | 2.831  | 0.1131 |
| AVDEMNGRIVGSKPLHVTLGQARRR                 | 2762.2             | 3            | 3.598  | 0.1836 |
| AVDHATNR                                  | 883.9              | 1            | 1.7688 | 0.1489 |
| AVDHINSTIAPALISSGLSVVEQEKLNDNLMELDGTENK   | 4166.7             | 3            | 6.1926 | 0.5443 |
| AVDHINSTIAPALISSGLSVVEQEKLNDNLMELDGTENKSK | 4381.9             | 3            | 6.7172 | 0.5986 |
| AVDIPHMDIEALK                             | 1452.7             | 2            | 3.3756 | 0.3138 |

| Peptide Sequence                          | Peptide mass (m/z) | Charge State | Xcorr  | DelCn2 |
|-------------------------------------------|--------------------|--------------|--------|--------|
| AVDIPHMDIEALKK                            | 1580.9             | 2            | 3.4388 | 0.4023 |
| AVDLGPPKPSDQETGEQVSSPSSHPALHTTTEDSAGVQTEF | 4236.4             | 3            | 4.5438 | 0.3102 |
| AVDNQVYVATASPAR                           | 1562.7             | 2            | 4.1545 | 0.4916 |
| AVDQSIEKK                                 | 1018.1             | 2            | 2.4721 | 0.1773 |
| AVDSEYPKNIK                               | 1264.4             | 2            | 2.4863 | 0.1628 |
| AVDSLVPIGR                                | 1027.2             | 2            | 3.3456 | 0.2871 |
| AVDSQILPK                                 | 971.1              | 2            | 2.9623 | 0.1436 |
| AVDWIFSHIDDLDAEAAMDISEGR                  | 2677.9             | 2            | 2.7592 | 0.2957 |
| AVEAAQLAEDLKVQLEHVQTR                     | 2349.6             | 3            | 5.2894 | 0.4262 |
| AVEDEATKGTR                               | 1177.2             | 2            | 2.7863 | 0.3471 |
| AVEEEDKMTPEQLAIK                          | 1832.1             | 2            | 5.1726 | 0.3828 |
| AVEEKIEWLESHQDADIEDFK                     | 2532.7             | 3            | 4.8035 | 0.421  |
| AVEEKIEWLESHQDADIEDFKAK                   | 2732.0             | 3            | 5.6585 | 0.396  |
| AVEFLASNESR                               | 1223.3             | 2            | 3.9562 | 0.3727 |
| AVEHINKTIAPALVSK                          | 1692.0             | 2            | 4.3119 | 0.4596 |
| AVEILADIQNSTLGEAEIERER                    | 2570.8             | 3            | 3.9214 | 0.3073 |
| AVEIVTSTSAK                               | 1177.3             | 2            | 2.4823 | 0.1308 |
| AVEKVEKQVNDVAVSK                          | 1644.9             | 2            | 3.7665 | 0.3094 |
| AVELAANTK                                 | 917.0              | 2            | 2.8379 | 0.2544 |
| AVELLPDGTANLAK                            | 1412.6             | 2            | 3.2096 | 0.3157 |
| AVENPTATEIQDVCSAVGLNVFLEK                 | 2649.0             | 3            | 3.4194 | 0.2462 |
| AVENSSTAIGIR                              | 1218.3             | 2            | 3.4889 | 0.3307 |
| AVEQHNGKTIFAYFTGSK                        | 1999.2             | 3            | 3.3904 | 0.2367 |
| AVEQLAEGLLSHYLPDLQR                       | 2153.4             | 2            | 2.7571 | 0.1716 |
| AVERGQLEQITGK                             | 1429.6             | 3            | 3.8589 | 0.1636 |
| AVETTAQSDNK                               | 1164.2             | 2            | 4.022  | 0.2757 |
| AVEVAWETLQEEFSR                           | 1794.9             | 2            | 3.5834 | 0.2881 |
| AVEVDPSLLLHMLE                            | 1566.8             | 2            | 3.7747 | 0.4332 |
| AVEYDTLFR                                 | 1114.2             | 2            | 2.6544 | 0.2216 |
| AVEYLTSSVASTDVLATVLEEMPPFPERESSILAK       | 3895.4             | 3            | 3.3075 | 0.1736 |
| AVFDETYDPVVR                              | 1409.5             | 2            | 3.7123 | 0.4328 |
| AVFDVDDK                                  | 922.1              | 2            | 2.5911 | 0.2044 |
| AVFHEEEQR                                 | 1145.2             | 2            | 2.829  | 0.1736 |
| AVFPSIVGRPR                               | 1199.4             | 2            | 2.9668 | 0.3056 |
| AVFQANQENLPILK                            | 1585.8             | 2            | 3.9095 | 0.2929 |
| AVFQANQENLPILKR                           | 1742.0             | 2            | 4.4149 | 0.3973 |



| Peptide Sequence                  | Peptide mass (m/z) | Charge State | Xcorr  | DelCn2 |
|-----------------------------------|--------------------|--------------|--------|--------|
| AVFVDLEPTVIDEIR                   | 1717.0             | 3            | 4.3449 | 0.2593 |
| AVFVDLEPTVIDEIRNGPYR              | 2304.6             | 2            | 2.84   | 0.1732 |
| AVFVDLEPTVIDEVR                   | 1702.9             | 2            | 5.5503 | 0.4847 |
| AVFVDLEPTVIDEVRTGTYR              | 2281.6             | 3            | 3.2362 | 0.3295 |
| AVGDKLPECEADDGCPKPPEIAHGYVEHSVR   | 3320.7             | 3            | 4.7104 | 0.4154 |
| AVGFGGDFDGVPRVPEGLEDVSKYPDLIAELLR | 3532.9             | 3            | 6.1078 | 0.5116 |
| AVGFSSGTENPHGVK                   | 1487.6             | 2            | 3.3003 | 0.38   |
| AVGKDNFTLIPEGTNGTEER              | 2149.3             | 2            | 5.8691 | 0.4155 |
| AVGKDNFTLIPEGVNGIEER              | 2159.4             | 2            | 6.4126 | 0.4111 |
| AVGKEELGK                         | 931.1              | 2            | 2.596  | 0.1805 |
| AVGKEELGKNINADEAAAMGAVYQAAALSK    | 2992.4             | 3            | 4.5677 | 0.3437 |
| AVGKVIPELDGK                      | 1226.4             | 2            | 3.6619 | 0.2017 |
| AVGKVIPELDGKLTGMAFR               | 2003.4             | 3            | 4.2444 | 0.2491 |
| AVGLISHVLEQNQEGDAAYR              | 2171.4             | 3            | 4.896  | 0.3239 |
| AVGLISHVLEQNQEGDAAYRK             | 2299.5             | 3            | 6.1526 | 0.4303 |
| AVGMHSFLVVGPPQALDPVVR             | 2093.5             | 3            | 3.7301 | 0.1982 |
| AVGPSGGGGETPR                     | 1142.2             | 2            | 3.0222 | 0.4566 |
| AVGPSSTQLYMVR                     | 1409.6             | 2            | 2.6365 | 0.2502 |
| AVGPTAEADKSAAEK                   | 1445.6             | 2            | 4.0304 | 0.3797 |
| AVGRLEAVSHTSDMHR                  | 1767.0             | 3            | 4.1432 | 0.402  |
| AVGTQTLSGAGLLK                    | 1316.5             | 2            | 3.8951 | 0.3524 |
| AVGVAVATGLHTELGK                  | 1523.8             | 2            | 4.2331 | 0.3806 |
| AVGVAVATGLHTELGKIR                | 1793.1             | 2            | 2.6896 | 0.1803 |
| AVHAHVNLGYTK                      | 1310.5             | 2            | 3.4986 | 0.4057 |
| AVHANPPTLLLVAHMLEVDPDDLAFLR       | 3123.6             | 3            | 5.9283 | 0.512  |
| AVHANPPTLLLVAHMLEVDPDDLAFLRK      | 3251.8             | 3            | 4.4606 | 0.4367 |
| AVHEQLAALSQGPISKPK                | 1875.2             | 3            | 3.2614 | 0.2222 |
| AVHHAAFGDEGAVIEVLHR               | 2029.2             | 2            | 5.8503 | 0.5351 |
| AVHISNPK                          | 866.0              | 1            | 2.2376 | 0.1225 |
| AVHLQGHEGPVYAVHAVYQR              | 2232.5             | 3            | 4.6757 | 0.2729 |
| AVIDLNNRWFNGQPIHAELSPVTDNR        | 3011.3             | 3            | 4.3015 | 0.2274 |
| AVIEAEKIAQVAK                     | 1370.6             | 2            | 4.0096 | 0.3313 |
| AVIEHNLLSASK                      | 1282.5             | 2            | 2.925  | 0.2742 |
| AVIFCLSADKK                       | 1195.5             | 2            | 2.6619 | 0.2863 |
| AVIFDRFR                          | 1024.2             | 2            | 2.4294 | 0.1702 |
| AVIHWIMDIPFVLSANLHGGDLVANYPYDETR  | 3629.1             | 3            | 5.9064 | 0.4913 |

| Peptide Sequence                    | Peptide mass (m/z) | Charge State | Xcorr  | DelCn2 |
|-------------------------------------|--------------------|--------------|--------|--------|
| AVILFKPMVSEPIHIHR                   | 1988.4             | 3            | 4.649  | 0.4011 |
| AVILIGGPQK                          | 996.2              | 2            | 2.4043 | 0.1533 |
| AVIQGLETLRGEHR                      | 1579.8             | 2            | 2.6984 | 0.1648 |
| AVIQVSQIVAR                         | 1184.4             | 2            | 3.1167 | 0.2566 |
| AVITSLLDQIPEMFADTR                  | 2021.3             | 2            | 3.5055 | 0.241  |
| AVITSLLDQIPEMFADTRETETVFPVIQAGMEALK | 3965.6             | 3            | 3.6015 | 0.2152 |
| AVIYNPATQADWTAK                     | 1649.8             | 2            | 3.0679 | 0.2203 |
| AVKDELLGEKPEVK                      | 1555.8             | 2            | 4.172  | 0.2406 |
| AVKDLVLLFETALLSSGFSLEDPQTHSNR       | 3288.7             | 3            | 4.39   | 0.308  |
| AVKESTITLQQAIEYFLSFVR               | 2460.8             | 3            | 3.5521 | 0.3773 |
| AVKNFTEVHPDYGSHIQALLDK              | 2483.8             | 3            | 4.502  | 0.3031 |
| AVKNFTEVHPDYGSHIQALLDKYNAEKPK       | 3314.7             | 3            | 3.7981 | 0.2655 |
| AVKQGESEVSR                         | 1190.3             | 2            | 3.1573 | 0.3565 |
| AVLAELPQQVVQYFK                     | 1734.0             | 2            | 3.3884 | 0.2449 |
| AVLAESYER                           | 1038.1             | 2            | 2.4296 | 0.1388 |
| AVLASMDNENMHTPDIGGQGTSEAIQDVIR      | 3272.6             | 3            | 7.8836 | 0.4971 |
| AVLAVHPDKAAGQPYEQAHA                | 2131.4             | 3            | 4.3245 | 0.2696 |
| AVLDALLEGK                          | 1029.2             | 2            | 3.3755 | 0.2353 |
| AVLDVFEEGTEASAATAVK                 | 1909.1             | 2            | 5.8234 | 0.5055 |
| AVLEEKEKDLANTGK                     | 1645.8             | 2            | 4.9144 | 0.4337 |
| AVLENNLGAAVLR                       | 1340.6             | 2            | 3.0097 | 0.1801 |
| AVLEPIQSTSLIGTLTR                   | 1800.1             | 2            | 4.3708 | 0.4061 |
| AVLEQEETAASR                        | 1375.5             | 2            | 4.3103 | 0.32   |
| AVLFCLSEDKK                         | 1253.5             | 2            | 3.1775 | 0.3673 |
| AVLGEVVLVYSGARPLSHQPGPEAPALPK       | 2855.3             | 3            | 4.7088 | 0.2776 |
| AVLGMAAAAEELLGQHLVQGVISVPK          | 2603.1             | 3            | 4.0683 | 0.3296 |
| AVLHVHGGGGPR                        | 1157.3             | 2            | 2.699  | 0.3979 |
| AVLIAGQPGTGK                        | 1112.3             | 2            | 3.617  | 0.3445 |
| AVLIDKDQSPK                         | 1214.4             | 2            | 3.0985 | 0.3075 |
| AVLIPIREVLTPESDISIAHVLAAR           | 2685.2             | 3            | 5.7472 | 0.4817 |
| AVLKELSEKLELAEK                     | 1701.0             | 2            | 4.7685 | 0.4019 |
| AVLLDLEPR                           | 1026.2             | 2            | 2.6873 | 0.2139 |
| AVLLGPPGAGK                         | 980.2              | 2            | 2.7502 | 0.1896 |
| AVLNPLCQVDYR                        | 1391.6             | 2            | 2.5543 | 0.2032 |
| AVLPVAESFGFADEIR                    | 1721.9             | 2            | 4.2469 | 0.4666 |
| AVLSAEQLRDEEVHAGLGELLR              | 2406.7             | 3            | 6.0685 | 0.5039 |

| Peptide Sequence                    | Peptide mass (m/z) | Charge State | Xcorr  | DelCn2 |
|-------------------------------------|--------------------|--------------|--------|--------|
| AVLTPNHVEFSR                        | 1370.5             | 2            | 2.4378 | 0.3384 |
| AVLTVVKDDDHGILDQFSR                 | 2129.4             | 3            | 4.6016 | 0.3798 |
| AVLVALKER                           | 999.2              | 2            | 2.7209 | 0.1391 |
| AVLVDLEPGTMDSVR                     | 1602.8             | 2            | 4.4848 | 0.3971 |
| AVMDDFAAFVEK                        | 1343.5             | 2            | 3.8422 | 0.4157 |
| AVMHFLVNHVK                         | 1295.6             | 2            | 2.6454 | 0.2974 |
| AVMLLHTHTITSR                       | 1480.8             | 2            | 3.4606 | 0.3646 |
| AVNSATGVPTV                         | 1016.1             | 2            | 2.72   | 0.3247 |
| AVNSLRDFVDDDDDDDLER                 | 2225.2             | 2            | 3.3272 | 0.2663 |
| AVNTAPVPGQTPHDESDRRTEPR             | 2531.7             | 3            | 3.4506 | 0.1995 |
| AVNTQALSGAGILR                      | 1371.6             | 2            | 2.7926 | 0.2667 |
| AVPEGFVIPR                          | 1085.3             | 2            | 2.732  | 0.2383 |
| AVPKEDIYSGGGGGGSR                   | 1607.7             | 3            | 3.4624 | 0.4432 |
| AVPLALALISVSNPR                     | 1521.8             | 2            | 2.5009 | 0.1092 |
| AVPLIHQEGNR                         | 1234.4             | 2            | 2.9286 | 0.255  |
| AVPLNASKQDGPMPKPHSVSLNDTETR         | 2891.2             | 3            | 4.0281 | 0.3204 |
| AVPLNASKQDGPMPKPHSVSLNDTETRK        | 3019.4             | 3            | 3.5526 | 0.2503 |
| AVPMAPAPASPGSSNDSSAR                | 1871.0             | 2            | 3.2843 | 0.2085 |
| AVPREELFVTSK                        | 1376.6             | 2            | 2.8793 | 0.1452 |
| AVPYQKFEAHPNDLYVEGLPENIPFR          | 3045.4             | 3            | 3.7317 | 0.2033 |
| AVQADGQVK                           | 916.0              | 2            | 2.4887 | 0.105  |
| AVQALCAVYEHVWVPR                    | 1743.0             | 2            | 3.9035 | 0.379  |
| AVQAQGGESQQEAQR                     | 1587.6             | 2            | 4.9131 | 0.4426 |
| AVQELVHPVVDR                        | 1362.6             | 2            | 2.9537 | 0.1654 |
| AVQFTEEKFGQAekteLDAHFENLLAR         | 3123.4             | 3            | 6.1791 | 0.4158 |
| AVQFTEEKLGQAekteLDAHLENLLSK         | 3043.4             | 3            | 5.9208 | 0.4752 |
| AVQGFFTSNNATR                       | 1413.5             | 2            | 3.8906 | 0.3209 |
| AVQGFFTSNNATRDFLLPFLEEPMDTEADLQFRPR | 4075.5             | 3            | 3.2461 | 0.1095 |
| AVQGGGATPVVGAVQGPVPGMPPMTQAPR       | 2729.2             | 3            | 3.5066 | 0.1159 |
| AVQGPEETVTQDCLQLIADSETPTIQK         | 2916.2             | 3            | 4.0534 | 0.1864 |
| AVQLKPRPPQGLVR                      | 1559.9             | 2            | 2.802  | 0.2516 |
| AVQLYQQTANVFENEER                   | 2040.2             | 2            | 3.689  | 0.3346 |
| AVQQPDGLAVLGIFLK                    | 1670.0             | 2            | 5.1305 | 0.54   |
| AVQSLDKNGVDLLMK                     | 1631.9             | 2            | 4.1116 | 0.3373 |
| AVQSTINHVKEERPEKIPDLK               | 2432.8             | 3            | 3.2023 | 0.1427 |
| AVQTDVVPYSPAISELIQSVLQK             | 2486.8             | 2            | 2.6453 | 0.1442 |

| Peptide Sequence                 | Peptide mass (m/z) | Charge State | Xcorr  | DelCn2 |
|----------------------------------|--------------------|--------------|--------|--------|
| AVQTLQMEIQQIMK                   | 1662.0             | 3            | 4.9108 | 0.3559 |
| AVQVHQDTLR                       | 1167.3             | 2            | 2.8462 | 0.3385 |
| AVRVFEFGGPEVLK                   | 1548.8             | 2            | 3.8502 | 0.2408 |
| AVSDASAGDYGSAIETLVTAISLIK        | 2453.7             | 2            | 5.8884 | 0.5552 |
| AVSDWIDEQEK                      | 1320.4             | 2            | 2.6987 | 0.1374 |
| AVSDWLIASVEGR                    | 1403.6             | 2            | 3.812  | 0.3161 |
| AVSEEQQPALK                      | 1200.3             | 2            | 3.2152 | 0.2086 |
| AVSEEQQPALKGK                    | 1385.5             | 2            | 3.3484 | 0.2128 |
| AVSEKEVDSGNDIYGNPIKR             | 2192.4             | 2            | 5.1408 | 0.4465 |
| AVSGASAGDYSDAIETLLTAIAVIK        | 2437.7             | 2            | 4.555  | 0.3823 |
| AVSILPLLGHGVPR                   | 1429.7             | 2            | 3.3979 | 0.338  |
| AVSIMGNEVFR                      | 1223.4             | 2            | 2.5426 | 0.1959 |
| AVSLFSLNDPALSPDIPPAHSPVHSHLSLER  | 3305.7             | 3            | 3.4098 | 0.1058 |
| AVSPTEPTR                        | 1055.2             | 2            | 2.5072 | 0.1589 |
| AVSREDSVKPGAHLTVK                | 1795.0             | 2            | 3.7553 | 0.2273 |
| AVSREDSVKPGAHLTVKK               | 1923.2             | 2            | 3.5286 | 0.2047 |
| AVSSAIAQLLGEVAQGNENYAGIAAR       | 2574.8             | 2            | 5.9194 | 0.3904 |
| AVTDKFLSAIVSSVDKIPYGMK           | 2398.8             | 3            | 5.9858 | 0.5235 |
| AVTELGRPAAEYWNSQKDILEEK          | 2805.1             | 3            | 4.6923 | 0.3483 |
| AVTELGRPDAEYWNSQK                | 1965.1             | 3            | 4.0146 | 0.1645 |
| AVTELGRPDAEYWNSQKDFLEDR          | 2740.9             | 3            | 4.1945 | 0.3578 |
| AVTELGRPDAEYWNSQKDFLEDRR         | 2897.1             | 3            | 3.3658 | 0.2525 |
| AVTELGRPDAEYWNSQKDILEQAR         | 2791.0             | 3            | 6.1752 | 0.4119 |
| AVTELGRPSAEYWNSQKDFLEDR          | 2712.9             | 3            | 4.9387 | 0.4004 |
| AVTELNEPLSNEDR                   | 1587.7             | 2            | 5.3077 | 0.4222 |
| AVTELNEPLSNEDRNLLSVAYK           | 2476.7             | 2            | 3.8499 | 0.3631 |
| AVTELNEPLSNEDRNLLSVAYKNVVGAR     | 3073.4             | 3            | 4.4215 | 0.4109 |
| AVTEQGAELSNEER                   | 1533.6             | 2            | 5.056  | 0.3973 |
| AVTEQGAELSNEERNLLSVAYK           | 2422.6             | 3            | 4.6751 | 0.531  |
| AVTEQGAELSNEERNLLSVAYKNVVGGR     | 3005.3             | 3            | 5.1951 | 0.4317 |
| AVTEQGHELSNEER                   | 1599.6             | 2            | 4.874  | 0.4724 |
| AVTEQGHELSNEERNLLSVAYK           | 2488.7             | 2            | 4.8306 | 0.4104 |
| AVTEQGHELSNEERNLLSVAYKNVVGAR     | 3085.4             | 3            | 7.613  | 0.526  |
| AVTGHTLALAAK                     | 1254.5             | 2            | 3.2788 | 0.252  |
| AVTGYNDPETGNIISLFQAMNK           | 2384.7             | 3            | 3.6659 | 0.1198 |
| AVTGYNDPETGNIISLFQAMNKELIEKGHGIR | 3518.0             | 3            | 3.4996 | 0.1481 |

| Peptide Sequence                   | Peptide mass (m/z) | Charge State | Xcorr  | DelCn2 |
|------------------------------------|--------------------|--------------|--------|--------|
| AVTGYRDPYTGQSVSLFQALKK             | 2430.7             | 3            | 5.8531 | 0.5144 |
| AVTHAIPALQPIVHDLFVLR               | 2211.6             | 3            | 3.9896 | 0.326  |
| AVTIHDTEK                          | 1014.1             | 2            | 2.4321 | 0.2787 |
| AVTKDEDEWKELEQK                    | 1849.0             | 3            | 3.5441 | 0.1911 |
| AVTKDEDEWKELEQKEVDYSGLR            | 2769.0             | 3            | 4.9847 | 0.4374 |
| AVTKYTSSK                          | 985.1              | 2            | 2.5131 | 0.2964 |
| AVTLHDQGTAQWADLSSQFYLR             | 2508.7             | 3            | 3.4412 | 0.1501 |
| AVTLHDQGTAQWADLSSQFYLRREEDIGKNR    | 3450.7             | 3            | 3.3358 | 0.1763 |
| AVTPVPTKTEEVSNLK                   | 1714.0             | 2            | 2.9193 | 0.3509 |
| AVTTVTQSTPVPGPSVPPPEELQVSPGPR      | 2926.3             | 3            | 4.6417 | 0.4446 |
| AVVDAGITTK                         | 975.1              | 2            | 2.6518 | 0.2872 |
| AVVEVDESGTR                        | 1162.2             | 2            | 3.5494 | 0.4417 |
| AVVGEEALTSDDLLEYLFLQK              | 2354.6             | 2            | 5.8001 | 0.399  |
| AVVGEEALTSDDLLEYLFLQKFER           | 2787.1             | 3            | 5.5735 | 0.4386 |
| AVVGVVAGGGR                        | 942.1              | 2            | 3.5799 | 0.3208 |
| AVVHGILMGVPVPPPIPEPDGCKSGINCPIQK   | 3315.0             | 3            | 5.8875 | 0.4079 |
| AVVHGILMGVPVPPPIPEPDGCKSGINCPIQKDK | 3558.2             | 3            | 4.2069 | 0.2832 |
| AVVISGAGK                          | 802.0              | 1            | 2.1803 | 0.1959 |
| AVVIVDDR                           | 887.0              | 2            | 2.6296 | 0.1914 |
| AVVIVDDRGR                         | 1100.3             | 2            | 3.0391 | 0.195  |
| AVVLAANHFGR                        | 1155.3             | 2            | 3.3331 | 0.3357 |
| AVVLAGFGGLNK                       | 1146.4             | 2            | 3.8464 | 0.3777 |
| AVVMTPVPLFSK                       | 1289.6             | 2            | 2.58   | 0.3166 |
| AVVNDATIFKLELPLKQK                 | 2028.4             | 3            | 3.3692 | 0.1684 |
| AVVPAKYLDEDTIYHLQPSGR              | 2373.6             | 3            | 3.9381 | 0.2447 |
| AVVPGVKPQDWISAAR                   | 1695.0             | 2            | 2.8606 | 0.417  |
| AVVQVFEGTSGIDAK                    | 1521.7             | 2            | 5.2258 | 0.5248 |
| AVVTHSSGNHGQALTYAAK                | 1913.1             | 2            | 4.9755 | 0.4805 |
| AVVVVDDRGR                         | 1086.2             | 2            | 2.5699 | 0.2316 |
| AVVYSNTIQSIMAIVK                   | 1738.1             | 2            | 5.1047 | 0.4473 |
| AVWPTMVDINSPELSTEAYK               | 2252.5             | 2            | 4.7259 | 0.411  |
| AVYSDADIFLLDDPLSAVDSHVAK           | 2562.8             | 2            | 3.5206 | 0.3277 |
| AWDDFFPGSDR                        | 1313.4             | 2            | 3.2259 | 0.2992 |
| AWDQEAEGAGPELGLR                   | 1699.8             | 2            | 5.9374 | 0.3431 |
| AWEEYYKK                           | 1117.2             | 2            | 2.8515 | 0.1389 |
| AWGNNQDGVVASQPAR                   | 1670.8             | 2            | 3.4275 | 0.1916 |

| Peptide Sequence                       | Peptide mass (m/z) | Charge State | Xcorr  | DelCn2 |
|----------------------------------------|--------------------|--------------|--------|--------|
| AWGPGLEGGVVGK                          | 1227.4             | 2            | 3.6168 | 0.2886 |
| AWGPGLHGGIVGR                          | 1277.5             | 2            | 3.5145 | 0.4014 |
| AWLFQHLTHPYPSEEQKK                     | 2240.5             | 3            | 4.641  | 0.2276 |
| AWQTATTTLNASNLIYPIFVTDVPDDIQPITSLPGVAR | 4101.6             | 3            | 3.9008 | 0.435  |
| AWRDPDEPVLLEEPVVLALAEK                 | 2490.8             | 3            | 5.9565 | 0.3718 |
| AWRDPDEPVLLEEPVVLALAEKYGR              | 2867.2             | 3            | 6.0271 | 0.4135 |
| AYAALAALEK                             | 1021.2             | 2            | 3.6212 | 0.285  |
| AYAALAALEKLFDPDTPLALDANKK              | 2546.0             | 3            | 5.7651 | 0.4296 |
| AYAALAALEKLFDPDTPLALDANKKK             | 2674.1             | 3            | 4.9508 | 0.4431 |
| AYAANSHQGQMLAQYIESFTQGSIEAHKR          | 3238.5             | 3            | 7.1793 | 0.4667 |
| AYADFYR                                | 906.0              | 1            | 1.7403 | 0.1387 |
| AYAEALKENSYVK                          | 1486.7             | 2            | 3.507  | 0.2848 |
| AYAEALKENSYVVK                         | 1614.8             | 2            | 4.2195 | 0.3985 |
| AYAGDKAEIIGR                           | 1280.4             | 2            | 3.131  | 0.3217 |
| AYALAFAR                               | 1012.1             | 2            | 3.3887 | 0.2435 |
| AYAQGISR                               | 866.0              | 2            | 2.4762 | 0.1612 |
| AYAQQLTEWAR                            | 1337.5             | 2            | 3.2447 | 0.2821 |
| AYASPAKLESIDGAR                        | 1549.7             | 2            | 2.872  | 0.33   |
| AYDATHLVK                              | 1018.1             | 1            | 3.038  | 0.2631 |
| AYDTDAGPVFVK                           | 1283.4             | 2            | 3.2076 | 0.3011 |
| AYEDQTKPVLEYYQK                        | 1876.1             | 3            | 4.1478 | 0.3887 |
| AYEDQTKPVLEYYQKK                       | 2004.2             | 3            | 3.691  | 0.2956 |
| AYFHLLNQIAPK                           | 1415.7             | 3            | 4.4089 | 0.3144 |
| AYGELPEHAK                             | 1115.2             | 2            | 2.5824 | 0.1135 |
| AYGENIGYSEK                            | 1231.3             | 2            | 3.2182 | 0.2888 |
| AYGENIGYSEKDR                          | 1502.6             | 2            | 3.7583 | 0.4105 |
| AYGPGIEPTGNMVK                         | 1434.6             | 2            | 3.6591 | 0.2197 |
| AYGSHCYALFLSPK                         | 1557.8             | 2            | 2.7399 | 0.2309 |
| AYGVESHVLSAETK                         | 1588.7             | 2            | 4.3063 | 0.3429 |
| AYHEQLSVAEITNACFEPANQMVK               | 2695.0             | 3            | 4.8279 | 0.4502 |
| AYHLQDDGTQTVR                          | 1504.6             | 2            | 3.3698 | 0.1941 |
| AYINKVEELK                             | 1207.4             | 2            | 2.9893 | 0.2417 |
| AYINKVEELKK                            | 1335.6             | 2            | 3.1671 | 0.2141 |
| AYINKVEELKKK                           | 1463.7             | 2            | 3.4311 | 0.1528 |
| AYIQENLELVEKGFSNLKK                    | 2224.5             | 3            | 4.0727 | 0.3061 |
| AYLDQTVVPILLQGLAVLAK                   | 2126.6             | 3            | 5.2624 | 0.4347 |

| Peptide Sequence                             | Peptide mass (m/z) | Charge State | Xcorr  | DelCn2 |
|----------------------------------------------|--------------------|--------------|--------|--------|
| AYLLGKEDAAR                                  | 1207.4             | 2            | 3.2741 | 0.2688 |
| AYLPVNESFGFTADLR                             | 1801.0             | 2            | 5.1648 | 0.5234 |
| AYLRDFMYVSQDPKDLLLGPTYATPK                   | 3132.6             | 3            | 4.2932 | 0.3338 |
| AYLTEENGQIAVFDATNTTR                         | 2215.4             | 2            | 5.6095 | 0.5034 |
| AYNYVAQEVDDYHAFQTLTHIYNK                     | 2905.1             | 3            | 4.1098 | 0.339  |
| AYPDVAALSDGYWVVSNR                           | 1984.2             | 3            | 3.3665 | 0.2597 |
| AYPDVAALSDGYWVVSNRVIPWVSGTSASTPVFGGILSLINEHR | 4801.4             | 3            | 5.3157 | 0.4508 |
| AYPLADAHGTK                                  | 1200.4             | 2            | 2.8029 | 0.3089 |
| AYPLADAHGTKK                                 | 1328.5             | 2            | 3.5508 | 0.4212 |
| AYQDRYQDLGAYSSAR                             | 1865.0             | 2            | 3.5682 | 0.2699 |
| AYQGVAAPFPK                                  | 1149.3             | 2            | 4.121  | 0.3414 |
| AYQHGGVTGLSQY                                | 1381.5             | 2            | 2.4843 | 0.1972 |
| AYQIDTVINLNVPFEVIK                           | 2077.4             | 2            | 4.794  | 0.3352 |
| AYQIDTVINLNVPFEVIKQR                         | 2361.7             | 3            | 4.391  | 0.2322 |
| AYQKQPTIFQNK                                 | 1466.7             | 2            | 4.0025 | 0.1918 |
| AYQKQPTIFQNKK                                | 1594.8             | 2            | 3.3197 | 0.1524 |
| AYQQALSR                                     | 937.0              | 2            | 2.416  | 0.1229 |
| AYSDPSTGEPATYGELQQR                          | 2071.1             | 2            | 5.6428 | 0.4766 |
| AYSDQAIVNLLK                                 | 1335.5             | 2            | 4.202  | 0.3112 |
| AYSEAHEISK                                   | 1135.2             | 2            | 3.354  | 0.2308 |
| AYSEAHEISKEHMQPHTPIR                         | 2362.6             | 2            | 5.2274 | 0.3941 |
| AYSPELIVHPVLDSPNAVHEVEK                      | 2544.8             | 3            | 4.8045 | 0.4075 |
| AYSPELIVHPVLDSPNAVHEVEKWLPR                  | 3097.5             | 3            | 3.607  | 0.2847 |
| AYTALHYLSHLSPGK                              | 1658.9             | 3            | 3.7739 | 0.3623 |
| AYTASLGETAVAFDFGPLAAVPK                      | 2297.6             | 2            | 4.8143 | 0.4525 |
| AYTGREFDDLSPEQQR                             | 1913.0             | 2            | 4.8218 | 0.4244 |
| AYTNFDAER                                    | 1087.1             | 1            | 2.7089 | 0.3427 |
| AYTNFDAERDALNIETAIK                          | 2156.3             | 2            | 4.5974 | 0.3726 |
| AYTNFDAERDALNIETAIKTK                        | 2385.6             | 3            | 5.3355 | 0.4274 |
| AYVAVDGIPQGVLER                              | 1587.8             | 3            | 3.6265 | 0.3431 |
| AYVDDTPAEQMK                                 | 1368.5             | 2            | 3.7529 | 0.3149 |
| AYVDDTPAEQMKAER                              | 1724.9             | 2            | 3.9662 | 0.2054 |
| AYVFERDQSVGDPK                               | 1611.7             | 3            | 3.6625 | 0.384  |
| AYVFERDQSVGDPKIDLIR                          | 2222.5             | 3            | 4.7856 | 0.3327 |
| AYVRDPYALDLIDKLLVLDPAQR                      | 2659.1             | 3            | 4.1288 | 0.2295 |
| AYVTKSPVDAGK                                 | 1236.4             | 2            | 3.4063 | 0.3861 |

| Peptide Sequence                    | Peptide mass (m/z) | Charge State | Xcorr  | DelCn2 |
|-------------------------------------|--------------------|--------------|--------|--------|
| AYVVLGQFLVLK                        | 1350.7             | 2            | 3.7232 | 0.3401 |
| AYYEFREEAYHSR                       | 1721.8             | 2            | 3.4308 | 0.2337 |
| AYYHLLEQVAPKGDDEGVPAVVIDMSGRLR      | 3158.6             | 3            | 5.167  | 0.4404 |
| CAGEVSAAANNNICGVGVAYNSK             | 2213.4             | 2            | 3.6904 | 0.2406 |
| CCTESLVNR                           | 1025.2             | 2            | 2.6839 | 0.1021 |
| CDQDAQNPLSAGLQGACLMETVELLQAK        | 2948.3             | 3            | 3.2857 | 0.1525 |
| CDVDIRKDLYANTVLSGGTTMYPGIADR        | 3046.4             | 3            | 4.0736 | 0.2606 |
| CELAFLLHTSHCLASGEVMISLGDVK          | 2749.2             | 3            | 3.8228 | 0.2294 |
| CESAPGCGVWQRPVIDNPNYK               | 2334.6             | 3            | 3.9214 | 0.2362 |
| CESAPGCGVWQRPVIDNPNYK GK            | 2519.8             | 3            | 4.5466 | 0.2279 |
| CEYLMELMTPAACPEPPPPEAPTEDDHDEL      | 3245.6             | 3            | 4.586  | 0.2951 |
| CGILTPGDDFLCLEGKEFNR                | 2228.5             | 2            | 3.0363 | 0.1106 |
| CHDFQCALLANLFASEGQPGK               | 2250.5             | 2            | 3.9421 | 0.2953 |
| CHDFQCALLANLFASEGQPGK VIEVK         | 2819.3             | 3            | 5.1334 | 0.2362 |
| CLAALTECAASGDGNILALAVDASR           | 2406.7             | 2            | 4.6912 | 0.2015 |
| CNPGGNSLKTNSEVIVAK                  | 1832.1             | 2            | 3.6868 | 0.1169 |
| CPEALFQPSFLGMESCGIHETTFNSIMK        | 3119.6             | 2            | 2.684  | 0.1723 |
| CPPGVVPACHNSKDTVTISGPQAPVFEFVEQLRK  | 3653.2             | 3            | 5.404  | 0.2534 |
| CPTDELSLTNCAVVNEKDFQSGQHIVR         | 3104.5             | 3            | 4.9956 | 0.2641 |
| CPVTVCGDVHGQFHDLMELFR               | 2404.8             | 3            | 4.3495 | 0.3482 |
| CQFGLAQECLHHAQDYGGLLLLATASGNANMVNK  | 3590.1             | 3            | 6.1717 | 0.473  |
| CSRHKVCIAQDSQTAVCISHR               | 2343.7             | 2            | 2.7056 | 0.1047 |
| CTYLVLDEADRMLDMGFEPQIR              | 2617.0             | 3            | 3.2377 | 0.1693 |
| CVHCVPLEPFDEEDYLNHLEPPVK            | 2695.1             | 3            | 4.3232 | 0.2695 |
| DAAAPAEPQAQHTR                      | 1463.5             | 2            | 3.6115 | 0.28   |
| DAAAVGNHVAK                         | 1053.2             | 2            | 3.0307 | 0.2792 |
| DAAGIAMEAIAFAR                      | 1407.6             | 2            | 2.8519 | 0.1446 |
| DAAGLECKPRPLHK                      | 1535.8             | 2            | 3.279  | 0.2499 |
| DAAGSGDKPGADTGR                     | 1375.4             | 2            | 2.9325 | 0.2192 |
| DAALATALGDKK                        | 1174.3             | 2            | 3.7454 | 0.3066 |
| DAALATALGDKKSLEGDLEDLKDQIAQLEASLAAK | 3685.1             | 3            | 3.2603 | 0.1083 |
| DAALKQLEALEKEK                      | 1586.8             | 3            | 3.7458 | 0.1952 |
| DAASLESQIQDTQELLQEETR               | 2405.5             | 2            | 5.9463 | 0.4168 |
| DAASLESQIQDTQELLQEETRQK             | 2661.8             | 3            | 4.0363 | 0.239  |
| DAASVDKVLELK                        | 1288.5             | 2            | 2.8294 | 0.1208 |
| DAASVDKVLELKEHK                     | 1682.9             | 2            | 4.1189 | 0.2794 |



| Peptide Sequence             | Peptide mass (m/z) | Charge State | Xcorr  | DelCn2 |
|------------------------------|--------------------|--------------|--------|--------|
| DAASVDK/VLELKEHKLDGK         | 2096.4             | 2            | 4.7859 | 0.3514 |
| DAASVEK                      | 719.8              | 1            | 1.7741 | 0.1123 |
| DAASVEK/VLDQKEHR             | 1725.9             | 2            | 3.7849 | 0.2844 |
| DAATIMQPYFTSNGLVTK           | 1958.2             | 2            | 3.8612 | 0.3533 |
| DADEAKRVESQLK                | 1489.6             | 2            | 3.0053 | 0.113  |
| DADPILISLR                   | 1113.3             | 2            | 3.0814 | 0.1365 |
| DADSITLFDVQQK                | 1480.6             | 2            | 3.399  | 0.2164 |
| DADSITLFDVQQKR               | 1636.8             | 2            | 2.6815 | 0.1547 |
| DADSQNPDAPEGK                | 1344.3             | 2            | 4.0625 | 0.233  |
| DADSQNPDAPEGKR               | 1500.5             | 2            | 2.8773 | 0.3019 |
| DADSSISVLEIHSQK              | 1629.8             | 2            | 2.4295 | 0.2056 |
| DADVQNFVFSISK                | 1470.6             | 2            | 4.8796 | 0.4179 |
| DADVQNFVFSISKDSIQK           | 2042.2             | 2            | 3.4462 | 0.1155 |
| DAEASNVLVGEVDFLDTPPIAFVR     | 2625.9             | 2            | 2.5145 | 0.1678 |
| DAEAWFTSR                    | 1083.1             | 2            | 3.5051 | 0.3015 |
| DAEAWFTSRTEELNR              | 1825.9             | 3            | 4.6051 | 0.2296 |
| DAEAWFTSRTEELNREVAGHTEQLQMSR | 3293.5             | 3            | 3.7381 | 0.2527 |
| DAEDAMDAMDGAVLDGR            | 1752.9             | 2            | 5.4749 | 0.4742 |
| DAEEAISQTIDTIVDMIK           | 1993.2             | 2            | 5.9365 | 0.4545 |
| DAEERASLAGNRNSMVIHIPEEPR     | 2693.0             | 2            | 2.7947 | 0.1294 |
| DAEFYEHR                     | 1067.1             | 2            | 2.6607 | 0.257  |
| DAEGIAEWLR                   | 1160.3             | 2            | 4.085  | 0.2621 |
| DAELAGSPELLEFLGTR            | 1819.0             | 2            | 4.7789 | 0.4838 |
| DAEMPATEKDLAEDAPWKK          | 2146.4             | 3            | 3.7391 | 0.1806 |
| DAENHEAQLK                   | 1155.2             | 2            | 2.6729 | 0.1024 |
| DAESIHQYLLQR                 | 1473.6             | 2            | 4.0098 | 0.3585 |
| DAFADAVQR                    | 993.1              | 2            | 3.3156 | 0.1995 |
| DAFENGWGR                    | 1181.2             | 2            | 2.5288 | 0.1134 |
| DAFVAIVQSVK                  | 1177.4             | 2            | 4.1596 | 0.3047 |
| DAGAPTYMYEFQYRPSFSSDMKPK     | 2818.1             | 3            | 3.2975 | 0.1916 |
| DAGDKDKEQELSEEDKQLQDELEMLVER | 3321.5             | 3            | 6.5287 | 0.4115 |
| DAGEGGLSLAIEGPSK             | 1501.6             | 2            | 4.3325 | 0.2874 |
| DAGEGLLAVQITDPEGKPK          | 1939.2             | 2            | 4.7595 | 0.3045 |
| DAGEGLLAVQITDQEGKPK          | 1970.2             | 2            | 4.5283 | 0.3488 |
| DAGHPLYPFNDPY                | 1506.6             | 2            | 3.1478 | 0.2137 |
| DAGIEPGPDTYLALLNAYA EK       | 2222.4             | 3            | 3.9145 | 0.2759 |

| Peptide Sequence                    | Peptide mass (m/z) | Charge State | Xcorr  | DelCn2 |
|-------------------------------------|--------------------|--------------|--------|--------|
| DAGMQLQGYR                          | 1139.3             | 2            | 3.8678 | 0.3787 |
| DAGNGPQALR                          | 999.1              | 2            | 2.9968 | 0.1868 |
| DAGQISGLNVLR                        | 1243.4             | 2            | 3.9936 | 0.3738 |
| DAGTIAGLNVLR                        | 1200.4             | 2            | 4.3692 | 0.2921 |
| DAGTIAGLNVMR                        | 1218.4             | 2            | 4.1521 | 0.4055 |
| DAGTITGLNVLR                        | 1230.4             | 2            | 3.3404 | 0.289  |
| DAGVIAGLNVLR                        | 1198.4             | 2            | 4.9982 | 0.3454 |
| DAGYEFDICFTSVQK                     | 1723.9             | 2            | 3.5515 | 0.3281 |
| DAGYGGISLAVEGPSK                    | 1521.7             | 2            | 3.5325 | 0.242  |
| DAHKSEVAHR                          | 1150.2             | 2            | 3.1241 | 0.3694 |
| DAHLLVESK                           | 1012.1             | 2            | 2.6715 | 0.2133 |
| DAHNALLDIQSSGR                      | 1497.6             | 2            | 4.5199 | 0.4236 |
| DAHQSLLATR                          | 1112.2             | 2            | 2.5188 | 0.2466 |
| DAHSVLLSHIFHGR                      | 1589.8             | 2            | 4.3965 | 0.4681 |
| DAIAQAVR                            | 844.0              | 2            | 2.7388 | 0.1965 |
| DAIFKQFHFKDFNR                      | 1814.0             | 3            | 3.4485 | 0.2529 |
| DAILDALENLTAEELKK                   | 1887.1             | 2            | 3.9947 | 0.3449 |
| DAINQGMDEELERDEK                    | 1893.0             | 2            | 3.0795 | 0.2634 |
| DAINQGMDEELERDEKVFLLGEEVAQYDGAYK    | 3677.0             | 3            | 5.766  | 0.4999 |
| DAINQGMDEELERDEKVFLLGEEVAQYDGAYKVSR | 4019.4             | 3            | 5.1799 | 0.3459 |
| DAKDKLESEMEDAYHEHQANLLR             | 2743.9             | 3            | 5.4288 | 0.389  |
| DAKIYQIYEGTSQIQR                    | 1914.1             | 2            | 5.0744 | 0.4792 |
| DAKLDKAQIHDLVLVGGSTR                | 2137.4             | 2            | 6.3303 | 0.5007 |
| DAKLDKSQIHDLVLVGGSTR                | 2153.4             | 2            | 6.5271 | 0.4342 |
| DAKMDKAKIHDLVLVGGSTR                | 2155.5             | 3            | 4.3657 | 0.3449 |
| DALGAQNASGER                        | 1189.2             | 2            | 3.9165 | 0.3535 |
| DALKSSVDAVK                         | 1133.3             | 2            | 2.5551 | 0.1563 |
| DALKTEFKANA EK                      | 1465.6             | 2            | 4.1292 | 0.3825 |
| DALLLIFANK                          | 1118.4             | 2            | 3.8218 | 0.1779 |
| DALNIETAIK                          | 1088.2             | 2            | 3.5932 | 0.1845 |
| DALNIETAIKTK                        | 1317.5             | 2            | 2.8231 | 0.1428 |
| DALNQATSQVESK                       | 1391.5             | 2            | 4.4308 | 0.4837 |
| DALSDLALHFLNK                       | 1457.7             | 2            | 3.9123 | 0.2595 |
| DALSSVQESQVAQQAR                    | 1717.8             | 3            | 3.5385 | 0.2007 |
| DAMPSDANLNSINK                      | 1490.6             | 2            | 2.9609 | 0.1671 |
| DANGNSFATR                          | 1053.1             | 2            | 3.2546 | 0.3809 |

| Peptide Sequence                      | Peptide mass (m/z) | Charge State | Xcorr  | DelCn2 |
|---------------------------------------|--------------------|--------------|--------|--------|
| DANLYISGLPR                           | 1219.4             | 2            | 3.0963 | 0.3083 |
| DANNGNLQLR                            | 1115.2             | 2            | 2.9146 | 0.12   |
| DAPEEEDHVLVLRK                        | 1650.8             | 2            | 4.5234 | 0.3585 |
| DAPQDFHPDR                            | 1198.2             | 2            | 2.9001 | 0.2619 |
| DAPQDFHPDRVK                          | 1425.5             | 2            | 3.0028 | 0.163  |
| DAPWTASSEKAPDMSSSEEFPSFGAQVAPK        | 3243.5             | 3            | 6.139  | 0.475  |
| DAQDVQASQAEADQQQTR                    | 1990.0             | 2            | 6.8239 | 0.5485 |
| DAQELYAAGENR                          | 1337.4             | 2            | 4.3778 | 0.4368 |
| DAQGLVLFDTVGGQVR                      | 1618.8             | 2            | 4.7237 | 0.4337 |
| DAQGQPGLER                            | 1071.1             | 2            | 2.7089 | 0.2505 |
| DAQISEGASR                            | 1034.1             | 2            | 2.5148 | 0.1857 |
| DAQLIKELGLR                           | 1256.5             | 2            | 3.3011 | 0.138  |
| DAQSNAARDFVNYLVR                      | 1840.0             | 3            | 4.7186 | 0.2877 |
| DAQVVQVVDGLSNILK                      | 1812.1             | 2            | 2.4581 | 0.1417 |
| DAQYAPGYDKVKDISEVVTPR                 | 2352.6             | 3            | 3.8464 | 0.2214 |
| DASDQNFDMFK                           | 1481.6             | 2            | 3.8234 | 0.1974 |
| DASIVGFFDDSFSEAHSEFLK                 | 2349.5             | 2            | 5.0785 | 0.5276 |
| DASLMVTNDGATILK                       | 1549.8             | 2            | 4.3429 | 0.3631 |
| DASTLQSQK                             | 978.0              | 1            | 1.8094 | 0.2694 |
| DASTLQSQKAEGTGDAK                     | 1707.8             | 2            | 4.1131 | 0.3868 |
| DASVAEAWLLGQEPYLSSR                   | 2093.3             | 2            | 5.616  | 0.3387 |
| DASVPLIDVTNLPTPR                      | 1708.9             | 2            | 3.1121 | 0.2747 |
| DATLTALDRGQQQVFK                      | 1792.0             | 2            | 3.7882 | 0.3538 |
| DATNDQVTKDAAEAIAIK                    | 1819.0             | 2            | 4.5188 | 0.1944 |
| DATNDQVTKDAAEAIAIKKHNVGVK             | 2453.7             | 3            | 5.5118 | 0.363  |
| DATNVAAAFEEAVR                        | 1464.6             | 2            | 2.6308 | 0.2655 |
| DATNVGDEGGFAPNILENK                   | 1962.1             | 2            | 5.9826 | 0.4275 |
| DATNVGDEGGFAPNILENKEGLELLK            | 2745.0             | 3            | 4.4299 | 0.1273 |
| DATNVGDEGGFAPNILENKEGLELLKTAIGK       | 3215.6             | 3            | 5.0876 | 0.3808 |
| DATNVGDEGGFAPNILENSEALELVK            | 2703.9             | 2            | 5.4001 | 0.5047 |
| DATNVGDEGGFAPNILENSEALELVKEAIDK       | 3260.5             | 3            | 4.6606 | 0.3275 |
| DATNVGDEGGFAPNILENSEALELVKEAIDKAGYTEK | 3910.2             | 3            | 5.3955 | 0.3274 |
| DATSKDQLISELK                         | 1448.6             | 2            | 2.9699 | 0.1397 |
| DATSKVALVYGMNEPPGAR                   | 2105.4             | 3            | 3.7646 | 0.222  |
| DAVGQPPRETDFMAFHQEHEVR                | 2597.8             | 3            | 4.8219 | 0.3729 |
| DAVLLVFANK                            | 1090.3             | 2            | 3.8804 | 0.2641 |

| Peptide Sequence                     | Peptide mass (m/z) | Charge State | Xcorr  | DelCn2 |
|--------------------------------------|--------------------|--------------|--------|--------|
| DAVSNTTNQLESK                        | 1407.5             | 2            | 4.0713 | 0.2788 |
| DAVTTTVTGAK                          | 1064.2             | 2            | 2.5587 | 0.1971 |
| DAVTYTEHAK                           | 1135.2             | 2            | 3.3453 | 0.3497 |
| DAVTYTEHAKR                          | 1291.4             | 2            | 2.8718 | 0.1931 |
| DAVVYPILVEFTR                        | 1522.8             | 3            | 4.702  | 0.3837 |
| DAVVYPILVEFTREVEEEPGIHSLK            | 2871.2             | 3            | 3.8076 | 0.3186 |
| DAYSGGAVNLYHVR                       | 1522.6             | 2            | 3.8871 | 0.4    |
| DAYTHPQFVTDVMKPLQIENIIDQEVQTLSGGELQR | 4115.6             | 3            | 3.9918 | 0.188  |
| DAYVSRNIAIQNNLTK                     | 1984.2             | 3            | 3.5792 | 0.1339 |
| DCGEDGLCISDLVLDVR                    | 1823.0             | 2            | 3.0615 | 0.1319 |
| DCIGGCSDLVSLQQSGELLTR                | 2195.5             | 2            | 4.4997 | 0.195  |
| DCIKDCTSALALVPFSIKPLLR               | 2404.9             | 3            | 4.0872 | 0.2306 |
| DCYVGDEAQSK                          | 1215.3             | 2            | 2.5234 | 0.1323 |
| DDEAAVALSSLIHALLDLDLDMVAIVR          | 2725.1             | 3            | 4.8008 | 0.3631 |
| DDEFTHLYTLIVRPDNTYEVK                | 2569.8             | 3            | 3.7296 | 0.1922 |
| DDETDEPKPK                           | 1174.2             | 2            | 2.9515 | 0.2328 |
| DDEVDVDGTVEEDLGK                     | 1735.7             | 2            | 5.8845 | 0.4836 |
| DDEVDVDGTVEEDLGKSR                   | 1979.0             | 2            | 4.6292 | 0.4209 |
| DDEVQVVR                             | 960.0              | 2            | 2.9037 | 0.2028 |
| DDFKRELD SITPEVLPGWK                 | 2246.5             | 3            | 5.0992 | 0.3429 |
| DDFSSGTSSR                           | 1059.0             | 2            | 2.9314 | 0.2757 |
| DDGLFSGDPNWF PK                      | 1595.7             | 2            | 4.71   | 0.4355 |
| DDGLFSGDPNWF PKK                     | 1723.9             | 2            | 4.1914 | 0.42   |
| DDGLSAAAR                            | 875.9              | 2            | 2.635  | 0.1837 |
| DDGSWEVIEGYR                         | 1426.5             | 2            | 4.1948 | 0.3939 |
| DDGTGQLLLPLSDAR                      | 1571.7             | 2            | 3.6374 | 0.3319 |
| DDGVFVQEVTQNSPAAR                    | 1833.9             | 2            | 4.6644 | 0.2822 |
| DDIENMVK                             | 964.1              | 2            | 2.4842 | 0.1194 |
| DDILNGSHPVSF DK                      | 1544.6             | 2            | 4.0708 | 0.3515 |
| DDILNGSHPVSF DKACEFAGFQCQIQFGPHNEQK  | 3809.2             | 3            | 3.7613 | 0.2267 |
| DDKASYVAWGHSTV VNPWGEVLAK            | 2630.9             | 3            | 3.3698 | 0.1743 |
| DDKHGSYEDAVHSGALND                   | 1930.9             | 2            | 4.1228 | 0.4417 |
| DDLVTVKTPAFAESVTEGDVRWEK             | 2693.9             | 3            | 4.6988 | 0.4416 |
| DDNGKPYVLP SVR                       | 1460.6             | 2            | 2.5704 | 0.1031 |
| DDNMFQIGK                            | 1068.2             | 2            | 2.4651 | 0.1884 |
| DDNSNPGGKTDEPK                       | 1474.5             | 2            | 2.9521 | 0.1744 |

| Peptide Sequence                    | Peptide mass (m/z) | Charge State | Xcorr  | DelCn2 |
|-------------------------------------|--------------------|--------------|--------|--------|
| DDPLTNLNTAFDVAEK                    | 1763.9             | 2            | 4.7319 | 0.3498 |
| DDPVTNLNNAFEVAEK                    | 1776.9             | 2            | 3.7797 | 0.3207 |
| DDRLLQALVDILNEEN                    | 1871.0             | 2            | 3.2427 | 0.1789 |
| DDSIRPFKVETSDEEIHDLHQR              | 2667.8             | 3            | 5.5648 | 0.3502 |
| DDSNESDVVESLDEIYHTGTFAQIHEMQDLGDKLR | 4009.2             | 3            | 4.114  | 0.2494 |
| DDSTKPKPEEEVKPVKEPDIKPQK            | 2763.1             | 3            | 5.0259 | 0.2383 |
| DDTIYEDEDVKEAIR                     | 1811.9             | 2            | 3.7575 | 0.3684 |
| DDVGKNVHELEK                        | 1383.5             | 2            | 3.6074 | 0.2742 |
| DDVGKSVHELEK                        | 1356.5             | 2            | 3.5211 | 0.2746 |
| DDYELIDVLVNNAK                      | 1621.8             | 2            | 2.8407 | 0.1531 |
| DEAAYGELR                           | 1024.1             | 2            | 3.2501 | 0.1351 |
| DEDKDKVGNVEYFGLGNSPGFPLQYYPYYGK     | 3561.9             | 3            | 5.0533 | 0.3344 |
| DEFEGLFKQPAENVNQLTDPK               | 2583.8             | 3            | 6.1245 | 0.351  |
| DEGNYLDDALVR                        | 1380.4             | 2            | 3.8991 | 0.4025 |
| DEHEHTYQDKKEEVLWMNTVGPYHNR          | 3228.5             | 3            | 6.4024 | 0.3206 |
| DEILPTTPISEQK                       | 1471.6             | 2            | 3.1257 | 0.1191 |
| DELADEIANSSGK                       | 1349.4             | 2            | 4.5925 | 0.3485 |
| DELEEGAPSQAMLR                      | 1546.7             | 2            | 3.3329 | 0.2477 |
| DENSVELTMAEGPYK                     | 1683.8             | 2            | 4.3633 | 0.3488 |
| DEPSVAAMVYPFTGDHK                   | 1865.1             | 2            | 4.0485 | 0.3136 |
| DEQGFGGAFPAR                        | 1252.3             | 2            | 3.3878 | 0.2325 |
| DEQQISAAVEK                         | 1218.3             | 2            | 2.6358 | 0.2144 |
| DESLKVDEHLAK                        | 1384.5             | 2            | 3.381  | 0.2207 |
| DESLKVDEHLAKQDAQILYK                | 2344.6             | 3            | 5.2235 | 0.3366 |
| DETKKTQNDVLHAENVK                   | 1970.1             | 2            | 4.8504 | 0.3344 |
| DETNYGIPQR                          | 1193.2             | 2            | 3.7228 | 0.3387 |
| DFAEKELFPIAAQVDKEHLFPAAQVK          | 2943.3             | 3            | 4.8675 | 0.4292 |
| DFAEKELFPIAAQVDKEHLFPAAQVKK         | 3071.5             | 3            | 3.6269 | 0.1126 |
| DFAVLEDHTLAHSLQEQEIEHHLASNVQR       | 3368.6             | 3            | 6.6315 | 0.4928 |
| DFDPAVTEYIQR                        | 1454.6             | 2            | 3.5838 | 0.2881 |
| DFEGAVDLLDKLNHYLEDKPSPPPVKELR       | 3336.7             | 3            | 3.926  | 0.248  |
| DFEQPLAISR                          | 1176.3             | 2            | 3.1808 | 0.2469 |
| DFFLANASR                           | 1041.1             | 1            | 2.6148 | 0.2154 |
| DFFNYLPLSSQDPAPVR                   | 1967.2             | 2            | 4.1421 | 0.3164 |
| DFFQSYGNVVELR                       | 1574.7             | 2            | 3.5902 | 0.2613 |
| DFGDLSFTVPKDDLYNNLIVNPR             | 2751.0             | 3            | 3.7326 | 0.2949 |

| Peptide Sequence                        | Peptide mass (m/z) | Charge State | Xcorr  | DelCn2 |
|-----------------------------------------|--------------------|--------------|--------|--------|
| DFGDSLAR                                | 880.9              | 1            | 2.2702 | 0.2913 |
| DFGGAVQDYFK                             | 1247.3             | 2            | 2.4482 | 0.1276 |
| DFGGVTNGKPEDK                           | 1364.4             | 2            | 2.8294 | 0.1531 |
| DFGNLYLNFASAATK                         | 1666.8             | 2            | 5.0832 | 0.3862 |
| DFGSFDK                                 | 815.9              | 1            | 2.5199 | 0.1158 |
| DFGSFDKFK                               | 1091.2             | 2            | 3.0994 | 0.307  |
| DFGSFDKFKK                              | 1348.5             | 1            | 3.7745 | 0.2757 |
| DFHINLFQVLPWLK                          | 1771.1             | 2            | 3.4631 | 0.1396 |
| DFIATLEAEAFDDVVGETVGK                   | 2227.4             | 2            | 5.3681 | 0.4773 |
| DFIATLEAEAFDDVVGETVGKTDYIPLLDVDEK       | 3630.0             | 3            | 4.1648 | 0.3192 |
| DFIATLEAEAFDDVVGETVGKTDYIPLLDVDEKTNSESK | 4333.7             | 3            | 4.5223 | 0.335  |
| DFIETHYLNEQVK                           | 1636.8             | 2            | 4.3485 | 0.222  |
| DFIGVDSTGKR                             | 1195.3             | 2            | 2.5586 | 0.1598 |
| DFINWLIQTK                              | 1278.5             | 2            | 3.9403 | 0.2396 |
| DFKPGDLIFAK                             | 1251.5             | 2            | 2.8526 | 0.3361 |
| DFLAGGIAAAISK                           | 1234.4             | 2            | 5.6618 | 0.3656 |
| DFLAGGVAAAISK                           | 1220.4             | 2            | 4.9623 | 0.3762 |
| DFLAGGVAAAVSK                           | 1206.4             | 2            | 4.4723 | 0.3005 |
| DFLASHAHGPSAGGAPSLLLLLPCALLHR           | 2936.4             | 3            | 3.3032 | 0.1671 |
| DFLDEYIFLAVGR                           | 1558.8             | 2            | 2.4159 | 0.1587 |
| DFLGKSDPFLEFFR                          | 1718.9             | 2            | 3.621  | 0.2844 |
| DFLLKPELLR                              | 1244.5             | 2            | 2.7719 | 0.1697 |
| DFLLPFLEEPMDEADLQFRPR                   | 2681.0             | 2            | 3.4842 | 0.208  |
| DFLLQQTMLR                              | 1265.5             | 2            | 3.2612 | 0.2067 |
| DFLMLAQTHSK                             | 1291.5             | 2            | 3.1541 | 0.3367 |
| DFLTPPLLSVR                             | 1258.5             | 2            | 2.5032 | 0.1385 |
| DFMYVSQDPK                              | 1230.4             | 2            | 3.8344 | 0.2472 |
| DFMYVSQDPKDQQLLLGPTYATPK                | 2629.0             | 2            | 5.1048 | 0.4271 |
| DFNHINVELSLLGK                          | 1599.8             | 3            | 4.6943 | 0.4355 |
| DFNHINVELSLLGKK                         | 1728.0             | 3            | 4.4046 | 0.2637 |
| DFPEEVAIVEELGR                          | 1603.8             | 2            | 5.1611 | 0.364  |
| DFPEEVAIVEELGRR                         | 1759.9             | 1            | 3.8954 | 0.3982 |
| DFPLSGYVELR                             | 1296.5             | 2            | 3.5453 | 0.3729 |
| DFPVESVKLTEVPVEPVLTVHPESK               | 2777.2             | 3            | 3.3668 | 0.2463 |
| DFQQYLPLVIEPLIK                         | 1817.2             | 2            | 2.7778 | 0.2468 |
| DFQSGQHVIVR                             | 1286.4             | 2            | 3.0503 | 0.2856 |

| Peptide Sequence              | Peptide mass (m/z) | Charge State | Xcorr  | DelCn2 |
|-------------------------------|--------------------|--------------|--------|--------|
| DFQYNEEEMKADKEEMNR            | 2307.5             | 3            | 3.5739 | 0.2551 |
| DFSALESQLQDTQELLQEENR         | 2494.6             | 2            | 6.9208 | 0.4648 |
| DFSALESQLQDTQELLQEENRQK       | 2750.9             | 3            | 4.9505 | 0.392  |
| DFSALESQLQDTQELLQEENRQKLSLSTK | 3380.7             | 3            | 5.3535 | 0.3806 |
| DFSAPLTISR                    | 1107.2             | 2            | 2.9076 | 0.2936 |
| DFSEDQGYPDPPNCPVVGK           | 2063.2             | 2            | 4.4638 | 0.4659 |
| DFSLEQLR                      | 1008.1             | 2            | 2.9828 | 0.2001 |
| DFSPSGIFGAFQR                 | 1429.6             | 2            | 4.2109 | 0.5013 |
| DFSPSSAK                      | 838.9              | 1            | 1.7823 | 0.2134 |
| DFSRYNYSLSLSAK                | 1679.8             | 2            | 2.8787 | 0.1832 |
| DFSSVFQFLR                    | 1246.4             | 2            | 3.6043 | 0.3295 |
| DFSSVFQFLREEETF               | 1882.0             | 2            | 3.6538 | 0.3267 |
| DFTATDLSEFAAK                 | 1416.5             | 2            | 4.5927 | 0.4635 |
| DFTATFGPLDSLNR                | 1655.8             | 2            | 2.9799 | 0.2539 |
| DFTFDLYR                      | 1077.2             | 2            | 2.6297 | 0.2296 |
| DFTFNKDGFRDFPAMVQELHQGGR      | 2814.1             | 3            | 4.8182 | 0.4341 |
| DFTPVCTTELGR                  | 1339.5             | 2            | 2.5144 | 0.2336 |
| DFTSLENTVEER                  | 1440.5             | 2            | 3.6019 | 0.2932 |
| DFTSLENTVEERLTELTK            | 2126.3             | 2            | 3.1803 | 0.2392 |
| DFTVSALHGDMQK                 | 1564.7             | 2            | 3.3472 | 0.2991 |
| DFTVSALHGDMQKER               | 1850.0             | 2            | 3.8746 | 0.44   |
| DFTVSAMHGDMQK                 | 1582.7             | 2            | 2.7176 | 0.1355 |
| DFTVSAMHGDMQKER               | 1868.0             | 2            | 4.4825 | 0.4302 |
| DFVAEPMGEKPVGSLAGIGEVLGK      | 2401.8             | 2            | 4.5923 | 0.4379 |
| DFVAEPMGEKPVGSLAGIGEVLGKK     | 2529.9             | 3            | 4.6564 | 0.3795 |
| DFVDHIDLVPVDGVVLVDPEYLKER     | 2998.3             | 3            | 4.9979 | 0.3838 |
| DFVNYLVR                      | 1026.2             | 2            | 3.2122 | 0.2773 |
| DFVSEQLTSLLVNGVQLPALGENKK     | 2701.1             | 3            | 4.57   | 0.3111 |
| DFYMTDSISR                    | 1235.3             | 2            | 2.4034 | 0.1154 |
| DFYVVEPLAFEGTPEQK             | 1970.2             | 2            | 3.2956 | 0.2516 |
| DGADFAK                       | 723.8              | 1            | 2.1939 | 0.1434 |
| DGADFAKWR                     | 1066.2             | 2            | 2.7407 | 0.2335 |
| DGADIHSDLFISIAQALLGGTAR       | 2342.6             | 2            | 5.2968 | 0.5186 |
| DGAESLAAQR                    | 1018.1             | 2            | 3.3931 | 0.262  |
| DGAGFLINLIDSPGHVDFSSEVTAALR   | 2803.1             | 3            | 3.4837 | 0.225  |
| DGALTLLLDEFENMSVTR            | 2025.3             | 2            | 3.8129 | 0.2749 |

| Peptide Sequence                  | Peptide mass (m/z) | Charge State | Xcorr  | DelCn2 |
|-----------------------------------|--------------------|--------------|--------|--------|
| DGALTQLNVAFSR                     | 1392.5             | 2            | 3.3242 | 0.272  |
| DGANIVIAAK                        | 972.1              | 2            | 3.8039 | 0.3271 |
| DGDFENPVPYTGAVK                   | 1609.7             | 2            | 4.388  | 0.3733 |
| DGDILGKYVD                        | 1095.2             | 2            | 2.9036 | 0.2177 |
| DGEDQTQDTELVEVTR                  | 1736.7             | 2            | 4.2425 | 0.248  |
| DGEDQTQDTELVEVTRPAGDGTFFQK        | 2638.7             | 2            | 4.3135 | 0.4125 |
| DGEDQTQDTELVEVTRPAGDR             | 2233.2             | 3            | 3.4502 | 0.1109 |
| DGEDQTQDTELVEVTRPAGDRTFQK         | 2737.8             | 3            | 4.5286 | 0.2952 |
| DGEEAGAYDGPR                      | 1237.2             | 2            | 3.9368 | 0.3773 |
| DGEIVGLSGR                        | 1003.1             | 2            | 3.2717 | 0.2275 |
| DGELPVEDDIDLSDVELDDLKDEL          | 2759.9             | 2            | 5.824  | 0.4943 |
| DGENYVLLDSTLPR                    | 1691.9             | 2            | 3.5754 | 0.3019 |
| DGEQIEQEEDDEKYIFSDSSQLTIK         | 3063.1             | 3            | 4.1725 | 0.2893 |
| DGETPDPEDPSR                      | 1315.3             | 2            | 2.5366 | 0.1527 |
| DGFGGLAAAR                        | 935.0              | 2            | 3.3408 | 0.1913 |
| DGFRDFPAMVQELHQGGR                | 2061.3             | 3            | 5.6804 | 0.2852 |
| DGFLASQLKSEELNLPEGK               | 2163.4             | 3            | 5.953  | 0.4563 |
| DGGAWGTEQR                        | 1077.1             | 2            | 3.0448 | 0.1183 |
| DGGDKKEPTQAVVEEQVLDKKEEPLPEEQR    | 3294.5             | 3            | 4.581  | 0.3181 |
| DGGEALVSPDGTVTEAPR                | 1771.9             | 2            | 3.1354 | 0.2686 |
| DGGLQNMELHGMIMLR                  | 1816.2             | 2            | 4.9486 | 0.4043 |
| DGGNPFAEPSELDNPFQDPAVIQHRPSR      | 3092.3             | 3            | 4.2518 | 0.3008 |
| DGGNQEVEIAR                       | 1188.2             | 2            | 3.8002 | 0.2349 |
| DGGQEYVVK                         | 995.1              | 2            | 3.2003 | 0.2909 |
| DGGQTESNEEGKENR                   | 1650.6             | 2            | 4.1065 | 0.351  |
| DGGSGNSTIIVSR                     | 1263.3             | 2            | 3.5087 | 0.3427 |
| DGHNLISSLLEVLSGDSLPR              | 2036.3             | 2            | 5.5212 | 0.4842 |
| DGHPVVVNILIGR                     | 1389.6             | 2            | 3.8008 | 0.3748 |
| DGIEPGHIPGTVNIPFTDFLSQEGLEKSPEEIR | 3624.0             | 3            | 5.2839 | 0.4526 |
| DGIFSESTFNSPQGVAIMNNIIYVADTENHLIR | 3668.0             | 3            | 5.252  | 0.4277 |
| DGKALER                           | 788.9              | 1            | 2.0387 | 0.209  |
| DGKDQGVNVR                        | 1088.2             | 2            | 2.5622 | 0.1456 |
| DGKLVSSESDVLPK                    | 1474.6             | 2            | 4.2712 | 0.3356 |
| DGKNNVAFMSYFLQ GK                 | 1820.1             | 2            | 3.138  | 0.2186 |
| DGKTLNDELEIIIEGMK                 | 1806.0             | 2            | 4.6023 | 0.435  |
| DGKTLNDELEIIIEGMKFDR              | 2224.5             | 3            | 5.2957 | 0.2985 |



| Peptide Sequence                     | Peptide mass (m/z) | Charge State | Xcorr  | DelCn2 |
|--------------------------------------|--------------------|--------------|--------|--------|
| DGKYDLDFK                            | 1101.2             | 2            | 2.5838 | 0.1324 |
| DGKYDLDFKSPTDPSR                     | 1842.0             | 3            | 3.4844 | 0.2451 |
| DGKYSQVLANGLDNKLRDLER                | 2534.8             | 3            | 3.4209 | 0.314  |
| DGLAFNALIHR                          | 1227.4             | 2            | 2.7987 | 0.2807 |
| DGLALGPGPFVTALEYATDTK                | 2137.4             | 2            | 4.1039 | 0.4259 |
| DGLGGLPDIVR                          | 1112.3             | 2            | 3.3862 | 0.2987 |
| DGLILTSR                             | 875.0              | 2            | 2.4724 | 0.135  |
| DGLLPENTFIVGYAR                      | 1665.9             | 2            | 3.0332 | 0.3316 |
| DGLQGGQRLHVLLGRAELRR                 | 2342.7             | 3            | 3.5932 | 0.117  |
| DGLQNEK                              | 803.8              | 1            | 2.0092 | 0.1385 |
| DGLQNEKNIVSTPVK                      | 1642.8             | 2            | 4.512  | 0.3534 |
| DGLSEAAAQSR                          | 1105.1             | 2            | 3.8491 | 0.2925 |
| DGLTDVYNK                            | 1025.1             | 2            | 3.279  | 0.3232 |
| DGLVVFVK                             | 835.0              | 2            | 2.8969 | 0.2108 |
| DGMAFNALIIK                          | 1217.4             | 2            | 2.4639 | 0.1654 |
| DGMDNQGGYGSVGR                       | 1413.5             | 2            | 4.3265 | 0.3975 |
| DGMVSFHDNPEKYNNPAMLHNIDQEMLK         | 3289.7             | 3            | 5.632  | 0.361  |
| DGNASGTTLLEALDCILPPTRPTDKPLR         | 2966.4             | 3            | 4.751  | 0.3985 |
| DGNASGTTLLEALDCILPPTRPTDKPLRLPLQDVYK | 3923.5             | 3            | 5.382  | 0.4589 |
| DGNDLHMTYK                           | 1194.3             | 2            | 3.2371 | 0.3367 |
| DGNVLLHEMQIQHPTASLIAK                | 2316.7             | 3            | 5.6949 | 0.5011 |
| DGPAAGDSGPR                          | 1000.0             | 2            | 2.81   | 0.1236 |
| DGPGETDAFGNSEGK                      | 1481.5             | 2            | 4.0152 | 0.4389 |
| DGPGETDAFGNSEGKELVASGENK             | 2409.5             | 3            | 5.8794 | 0.456  |
| DGPGETDAFGNSEGKELVASGENKIK           | 2650.8             | 3            | 3.798  | 0.2628 |
| DGPGFYTTR                            | 1014.1             | 2            | 2.4864 | 0.1904 |
| DGPVRPQNAEEEEKR                      | 1625.7             | 3            | 3.4122 | 0.3143 |
| DGQAMLWDLNEGK                        | 1477.6             | 2            | 4.3035 | 0.2768 |
| DGQEGITAFLLQK                        | 1307.4             | 2            | 2.8452 | 0.3124 |
| DGQVINETSQHHDDLE                     | 1837.8             | 2            | 4.0638 | 0.3936 |
| DGQYLLTGGDR                          | 1195.3             | 2            | 3.2221 | 0.313  |
| DGRGALQNIIPASTGAAK                   | 1740.9             | 2            | 5.1029 | 0.388  |
| DGRISVAGVTSSNVGYLAHAIHQVTK           | 2682.0             | 3            | 6.512  | 0.4649 |
| DGSAFEDGLRHPFIVNHPK                  | 2137.3             | 2            | 3.8178 | 0.3233 |
| DGSATLSGIQLATR                       | 1390.5             | 2            | 3.5854 | 0.2852 |
| DGSAVEIVGLSK                         | 1175.3             | 2            | 2.9286 | 0.2575 |

| Peptide Sequence                        | Peptide mass (m/z) | Charge State | Xcorr  | DelCn2 |
|-----------------------------------------|--------------------|--------------|--------|--------|
| DGSDVIYPAR                              | 1093.2             | 2            | 3.1993 | 0.2068 |
| DGSFSDEMNTILDNLAAR                      | 1970.1             | 2            | 5.1504 | 0.4661 |
| DGSLASNPYSGDLTK                         | 1525.6             | 2            | 3.8968 | 0.3535 |
| DGSTTAGNSSQVSDGAAAILLAR                 | 2163.3             | 2            | 6.0264 | 0.477  |
| DGSVAIASKPR                             | 1101.2             | 2            | 3.0973 | 0.1159 |
| DGTFPLPIGESVTVTR                        | 1689.9             | 2            | 2.99   | 0.3564 |
| DGTGVVEFVR                              | 1079.2             | 2            | 2.4356 | 0.1729 |
| DGTIDFTPGSELLTK                         | 1707.9             | 2            | 4.0704 | 0.2711 |
| DGTVLCELINALYPEGQAPVKK                  | 2359.7             | 2            | 3.4626 | 0.3223 |
| DGTVTAGNASGVADGAGAVIIASEDAVK            | 2517.7             | 2            | 6.9096 | 0.5228 |
| DGTVTAGNASGVADGAGAVIIASEDAVKKHNFTPLAR   | 3582.9             | 3            | 4.7511 | 0.3581 |
| DGTAVTYIPDK                             | 1343.5             | 2            | 2.9084 | 0.2223 |
| DGVGGLPTFLENSFIGSAR                     | 1938.1             | 2            | 4.44   | 0.4642 |
| DGVIEASINHEK                            | 1312.4             | 2            | 2.6054 | 0.1919 |
| DGVLTLANNVTPAKDVPPLSETEATPVPIKDMEIAQTQK | 4133.7             | 3            | 5.6167 | 0.4437 |
| DGVREVFEMATR                            | 1410.6             | 2            | 2.798  | 0.2779 |
| DGVVEITGK                               | 918.0              | 1            | 2.5012 | 0.3368 |
| DGVVEITGKHEER                           | 1469.6             | 2            | 4.0251 | 0.3858 |
| DGVVEITGKHEERQDEHGYISR                  | 2555.7             | 3            | 4.4865 | 0.3139 |
| DGVYVLDLAAK                             | 1164.3             | 2            | 3.2688 | 0.3222 |
| DGYADIVDLNSPLEGPDQK                     | 2146.3             | 2            | 4.947  | 0.5081 |
| DGYAQILR                                | 936.0              | 2            | 2.9278 | 0.2258 |
| DGYDYDGYR                               | 1124.1             | 2            | 2.4625 | 0.2147 |
| DGYNITLSK                               | 1061.1             | 2            | 2.7668 | 0.2723 |
| DHAISLSEPR                              | 1125.2             | 2            | 2.6176 | 0.2241 |
| DHANEELDELKR                            | 1469.5             | 3            | 4.3597 | 0.4359 |
| DHASIQMNVAEVDKVTGR                      | 1971.2             | 3            | 6.2023 | 0.5558 |
| DHATLNGALQFATK                          | 1487.6             | 2            | 2.8354 | 0.1872 |
| DHAVVVGVYRPLPK                          | 1550.8             | 3            | 3.3819 | 0.286  |
| DHAVVVGVYRPPPK                          | 1534.8             | 2            | 4.2064 | 0.4507 |
| DHDTFLAVR                               | 1074.2             | 2            | 2.4739 | 0.1792 |
| DHEKDAFEHIVTQFSSVPVSVVSDSYDIYNACEK      | 3861.2             | 3            | 5.1541 | 0.2327 |
| DHFALDRPSETHADYLLR                      | 2157.3             | 3            | 3.7102 | 0.4461 |
| DHFEEAMR                                | 1035.1             | 2            | 2.4712 | 0.1552 |
| DHFQLGTLSHLTLNIK                        | 1724.9             | 2            | 4.8003 | 0.3343 |
| DHGLLIYHIPQVEPR                         | 1788.0             | 2            | 4.4626 | 0.415  |

| Peptide Sequence                       | Peptide mass (m/z) | Charge State | Xcorr  | DelCn2 |
|----------------------------------------|--------------------|--------------|--------|--------|
| DHIKDSFHSLR                            | 1355.5             | 3            | 3.2239 | 0.337  |
| DHINLPGFSGQNPLRGPNDER                  | 2334.5             | 3            | 3.2821 | 0.2379 |
| DHLPPPEEEPLVLMCGPPPMIQYACLPNLDHVGHPTEP | 4244.9             | 3            | 3.3266 | 0.2248 |
| DHPESYHSFMWNNFFK                       | 2087.3             | 2            | 4.6307 | 0.4113 |
| DHPHTAAYLQELGR                         | 1608.7             | 2            | 2.9245 | 0.3189 |
| DHPLPEVAHVK                            | 1242.4             | 3            | 3.5669 | 0.3238 |
| DHQEVETEGPESADTGDKSESPDEANVGKHPK       | 3421.5             | 3            | 5.3455 | 0.4227 |
| DHSAIPVINR                             | 1122.3             | 2            | 2.4332 | 0.3492 |
| DHSPDLYSLELAGLDEIGKR                   | 2229.4             | 3            | 4.1012 | 0.4294 |
| DHSSLLQGTLAEHFGVLPGPR                  | 2232.5             | 3            | 3.3811 | 0.2432 |
| DHTDQTSETAPDASVPPSVKPK                 | 2308.4             | 3            | 4.1451 | 0.1976 |
| DHYEATAMHR                             | 1231.3             | 2            | 2.8919 | 0.3044 |
| DIAANEENRK                             | 1160.2             | 2            | 2.8645 | 0.1982 |
| DIAQQLQATCTSLGSSIQGLPTNVKDQVQQAR       | 3400.8             | 3            | 5.7839 | 0.4781 |
| DIASPHELYR                             | 1302.4             | 2            | 2.7029 | 0.2018 |
| DICNDVLSLLEK                           | 1362.6             | 2            | 4.6357 | 0.3208 |
| DIDEVSSLLR                             | 1147.3             | 2            | 3.6026 | 0.2663 |
| DIDIHEVR                               | 997.1              | 2            | 2.9325 | 0.2214 |
| DIDKAITISSALQAGTVWVNCYGVVSAQCPFGGFK    | 3648.2             | 3            | 6.7192 | 0.482  |
| DIDNLVQR                               | 973.1              | 2            | 2.8678 | 0.1793 |
| DIDPQNDLTFLR                           | 1447.6             | 2            | 3.9141 | 0.4171 |
| DIDSFVPSK                              | 1008.1             | 2            | 2.5818 | 0.2363 |
| DIDTAAK                                | 733.8              | 1            | 2.4081 | 0.2495 |
| DIDTHTHR                               | 995.0              | 2            | 2.6017 | 0.2565 |
| DIEDVFYK                               | 1029.1             | 2            | 2.6669 | 0.1617 |
| DIEEIIDELK                             | 1217.3             | 2            | 3.1271 | 0.1013 |
| DIELVMSQANVSR                          | 1462.7             | 2            | 2.7636 | 0.1016 |
| DIEQSIKSETSGSFEDALLAIVK                | 2481.7             | 3            | 4.2017 | 0.4    |
| DIETFYNTSIEEMPLNVADLI                  | 2428.7             | 2            | 4.177  | 0.3978 |
| DIETFYNTTVEEMPMNVADLI                  | 2446.7             | 2            | 3.5774 | 0.2699 |
| DIFNKGFGFGLVK                          | 1442.7             | 2            | 3.8366 | 0.1689 |
| DIFNKGFGFGLVKLDVK                      | 1898.2             | 3            | 3.4944 | 0.291  |
| DIGAIAQVHAENGDIIEEQQR                  | 2378.5             | 3            | 4.0111 | 0.206  |
| DIGEGNLSTAAAAALAAAVK                   | 1886.1             | 2            | 4.7443 | 0.3934 |
| DIGFIKLD                               | 921.1              | 2            | 3.1938 | 0.2694 |

| Peptide Sequence                  | Peptide mass (m/z) | Charge State | Xcorr  | DelCn2 |
|-----------------------------------|--------------------|--------------|--------|--------|
| DIGIWYNILRGIGKLAVIINAFVISFTSDFIPR | 3724.4             | 3            | 3.4552 | 0.165  |
| DIHELFPENKLDHVR                   | 1962.2             | 3            | 3.5353 | 0.2746 |
| DIHTLAQLISAYSLVDPEK               | 2114.4             | 2            | 2.9797 | 0.2946 |
| DIHTLAQLISAYSLVDPEKAK             | 2313.6             | 2            | 6.2757 | 0.4734 |
| DIALNPLYR                         | 1188.4             | 2            | 3.1451 | 0.2458 |
| DIHDPGRGAPLAK                     | 1460.7             | 2            | 2.5664 | 0.1789 |
| DIILQSNPLLEAFGNAK                 | 1844.1             | 2            | 2.6459 | 0.2742 |
| DIISDTSGDFRK                      | 1354.4             | 2            | 3.0881 | 0.1967 |
| DIISIAEDEDLR                      | 1389.5             | 2            | 3.8209 | 0.3742 |
| DIISIAEDEDLRVHFEESKLEDLLR         | 3073.4             | 3            | 5.5009 | 0.4219 |
| DIKDTTVGTLR                       | 1434.6             | 2            | 4.1884 | 0.371  |
| DIKPAATHHYLVVVK                   | 1690.0             | 3            | 3.4355 | 0.2037 |
| DIKPDNVLLDVNGHIR                  | 1819.1             | 3            | 3.6422 | 0.2029 |
| DIKPQLELIEDEEKLKETEPVEAYVIQK      | 3328.8             | 3            | 4.8221 | 0.358  |
| DILAQVKPLGPQLADPEVFLPQGELLDSP     | 3101.5             | 3            | 3.7963 | 0.2549 |
| DILIQYDR                          | 1036.2             | 2            | 2.6801 | 0.124  |
| DILIVVGNIEEAPMAWR                 | 2040.4             | 3            | 5.1599 | 0.3236 |
| DILVATDVAGR                       | 1130.3             | 2            | 2.7377 | 0.2259 |
| DIMEDTIEDKLDTK                    | 1666.8             | 2            | 2.6867 | 0.1088 |
| DIMEIEGEPAPDHR                    | 1609.7             | 2            | 2.9484 | 0.2594 |
| DINAVLIDMER                       | 1289.5             | 2            | 3.0465 | 0.2764 |
| DINAYNCEEPTEK                     | 1526.6             | 2            | 3.488  | 0.3007 |
| DINAYNCEEPTEKLPFPIIDDR            | 2593.9             | 3            | 3.7635 | 0.1372 |
| DINEIDINMNDPLFTK                  | 1893.1             | 2            | 5.0892 | 0.4078 |
| DINLASFIEQVAVSMT                  | 1739.0             | 2            | 4.2243 | 0.4625 |
| DINLQDEDWNEFNDINK                 | 2123.2             | 2            | 4.724  | 0.3837 |
| DINQEVYNFLATAGAK                  | 1754.9             | 2            | 5.4737 | 0.4845 |
| DIPGLTDTTVPR                      | 1285.4             | 2            | 2.7067 | 0.3105 |
| DIPNMFMSAGSVSK                    | 1599.8             | 2            | 4.8599 | 0.5934 |
| DIPVLVATDVAAR                     | 1340.6             | 2            | 3.8865 | 0.4068 |
| DIPVTAQPSKDVHVVK                  | 1734.0             | 2            | 2.8885 | 0.2959 |
| DIPVVHQLLTR                       | 1291.5             | 2            | 2.9083 | 0.2796 |
| DIQDLKFGVEQDVMVFASFIRK            | 2702.1             | 3            | 3.537  | 0.3059 |
| DIQENDEEAVQVK                     | 1517.6             | 2            | 4.0257 | 0.2829 |
| DIQENDEEAVQVKEQSILELGSLLAK        | 2900.2             | 3            | 5.1708 | 0.2896 |
| DIQNTQCLLNVEHLSAGCPHVTLQFADSK     | 3183.6             | 3            | 3.9475 | 0.2306 |

| Peptide Sequence                        | Peptide mass (m/z) | Charge State | Xcorr  | DelCn2 |
|-----------------------------------------|--------------------|--------------|--------|--------|
| DIQNTQCLLNVEHLSAGCPHVTLQFADSKGDVGLGLVK  | 4022.6             | 3            | 5.4659 | 0.4481 |
| DIQTLLSR                                | 946.1              | 2            | 2.5504 | 0.1784 |
| DIRGETLNHHVNAR                          | 1632.8             | 2            | 2.7944 | 0.1395 |
| DIRPGAAFEPTYIYR                         | 1770.0             | 2            | 2.6591 | 0.1595 |
| DISEASVFDAYVLPK                         | 1654.8             | 2            | 4.2943 | 0.3373 |
| DISEVVTPR                               | 1016.1             | 2            | 2.5097 | 0.1564 |
| DISILQCHGDCDPLVPLMFGSLTVEK              | 2832.3             | 3            | 3.5688 | 0.1063 |
| DISPVLKDPASFR                           | 1445.6             | 2            | 3.2102 | 0.3193 |
| DISQAYYTVYKK                            | 1479.7             | 2            | 3.3062 | 0.3106 |
| DISTLNSGKK                              | 1063.2             | 1            | 2.6372 | 0.2049 |
| DISTNYYSQK                              | 1290.4             | 2            | 3.6161 | 0.338  |
| DISTNYYSQKK                             | 1418.5             | 2            | 3.7442 | 0.3273 |
| DISTTLNADEAVAR                          | 1476.6             | 2            | 3.9076 | 0.3746 |
| DITDTLVAVTISEGAHHLDLR                   | 2277.5             | 3            | 3.7498 | 0.1277 |
| DITPLQVVLPNTALHLK                       | 1873.2             | 2            | 3.971  | 0.307  |
| DITYFIQQLLR                             | 1410.6             | 2            | 4.1477 | 0.3416 |
| DITYFIQQLLRDREVGIPPEQSLETAK             | 3161.6             | 3            | 3.9892 | 0.2238 |
| DIVHSGLAYTMER                           | 1492.7             | 2            | 2.946  | 0.3666 |
| DIVIAETLEDLDR                           | 1502.6             | 2            | 4.7493 | 0.406  |
| DIVLVAYSALGSQR                          | 1492.7             | 2            | 3.6352 | 0.3066 |
| DIVPGDIVEIAVGDKVPADIR                   | 2192.5             | 2            | 4.5219 | 0.4139 |
| DIVPGDIVEVAVGDKVPADIR                   | 2178.5             | 2            | 4.9008 | 0.4709 |
| DIVQFVPFR                               | 1121.3             | 2            | 2.8779 | 0.2448 |
| DIVQFVPYR                               | 1137.3             | 2            | 2.6908 | 0.2312 |
| DIVVLGVEKK                              | 1100.3             | 2            | 2.7416 | 0.1191 |
| DIWFGTPEGEFVSMGVISDGNSYGV PDDLLYSFPVVIK | 4152.6             | 3            | 4.0012 | 0.1024 |
| DKAGPHKEIYPYVIQELRPTLNELGISTPEELGLDKV   | 4164.7             | 3            | 5.7165 | 0.388  |
| DKAILDIERPDLMIYEPHFTYSLLEHVELPR         | 3755.3             | 3            | 5.6636 | 0.3409 |
| DKAKETADAITK                            | 1291.4             | 2            | 3.4418 | 0.2766 |
| DKANMQHR                                | 1000.1             | 2            | 2.5351 | 0.1892 |
| DKAPGQLECEAIAALNSCLRDLDQASLAAVSQQLAPR   | 3969.5             | 3            | 4.3128 | 0.3379 |
| DKAPVQPQQSPAAAPGGTDEKPSGK               | 2462.7             | 3            | 4.3699 | 0.2836 |
| DKASDASDKQR                             | 1221.3             | 2            | 2.5068 | 0.1853 |
| DKASQEGGDVVGAR                          | 1403.5             | 2            | 2.9144 | 0.1254 |
| DKDAIYGHPLFPLLALVFEK                    | 2287.7             | 3            | 4.543  | 0.2034 |
| DKDAYSSFGSR                             | 1233.3             | 2            | 2.5506 | 0.2444 |

| Peptide Sequence                   | Peptide mass (m/z) | Charge State | Xcorr  | DelCn2 |
|------------------------------------|--------------------|--------------|--------|--------|
| DKDDQEWESPPKPTVFISGVIAR            | 2800.1             | 3            | 3.8981 | 0.2536 |
| DKDFAIDIIK                         | 1178.4             | 2            | 3.1642 | 0.1931 |
| DKDPVNK                            | 815.9              | 1            | 2.453  | 0.1315 |
| DKDSDKFK                           | 997.1              | 1            | 2.1257 | 0.2901 |
| DKEEKSSR                           | 1108.1             | 2            | 2.853  | 0.1164 |
| DKENALMPNWLHLPVGYHGR               | 2348.7             | 3            | 4.0663 | 0.3376 |
| DKETTENENTK                        | 1309.3             | 2            | 3.3441 | 0.3088 |
| DKETTENENTKFEVR                    | 1840.9             | 2            | 4.9256 | 0.4028 |
| DKEVGNLYDMFHTR                     | 1725.9             | 2            | 3.7301 | 0.2976 |
| DKEVNSQVYSR                        | 1325.4             | 2            | 2.9858 | 0.2029 |
| DKEVQQLQENLDSTVTQLAAFTK            | 2607.9             | 3            | 4.1686 | 0.2258 |
| DKFSFDLGKGEVIK                     | 1583.8             | 2            | 3.954  | 0.3493 |
| DKGEYTLVVK                         | 1152.3             | 2            | 2.4331 | 0.1143 |
| DKGIVVGIVDKGVVPLAGTDGETTTQGLDGLSER | 3526.9             | 3            | 4.8771 | 0.3395 |
| DKGLQTSQDAR                        | 1219.3             | 2            | 2.506  | 0.2239 |
| DKGLVEKLTAYAMTIPFVR                | 2153.6             | 3            | 3.8686 | 0.3048 |
| DKGNEVNAER                         | 1132.2             | 2            | 2.7337 | 0.2524 |
| DKGTGREQQIVIQSSGGLSKDDIENMVK       | 3034.3             | 3            | 5.7926 | 0.3778 |
| DKIIFLHGK                          | 1071.3             | 2            | 2.4934 | 0.1618 |
| DKIIVNDR                           | 973.1              | 1            | 2.5266 | 0.1864 |
| DKILGATIENSR                       | 1317.5             | 2            | 3.6165 | 0.1985 |
| DKLDGNELDLSLSDLNEVPVKELAALPK       | 3037.4             | 3            | 6.4506 | 0.47   |
| DKLESEMEDAYHEHQANLLR               | 2429.6             | 3            | 6.1345 | 0.4455 |
| DKLEYFEERPFAAASIGQVHLAR            | 2649.0             | 3            | 5.7356 | 0.4429 |
| DKLKSELVANNVTLPAGEQR               | 2183.5             | 3            | 5.1375 | 0.248  |
| DKLLAAVKEDAAATK                    | 1544.8             | 2            | 4.0246 | 0.3204 |
| DKLNNLVLFDK                        | 1319.5             | 2            | 3.5559 | 0.3217 |
| DKLNNLVLFDKATYDKLCK                | 2242.6             | 3            | 3.3204 | 0.3431 |
| DKLPQPVQPDVSHCK                    | 1789.0             | 2            | 3.2527 | 0.2875 |
| DKLTELQLR                          | 1116.3             | 2            | 2.7354 | 0.1276 |
| DKLVGAIVYYDGQHNDAR                 | 2035.2             | 2            | 5.9008 | 0.4371 |
| DKLVVYHTNGPK                       | 1371.6             | 2            | 2.7563 | 0.2002 |
| DKMMNGGHYTYSENK                    | 1804.0             | 2            | 4.984  | 0.4417 |
| DKMMNGGHYTYSENKFEK                 | 2160.4             | 2            | 4.0425 | 0.261  |
| DKMMNGGHYTYSENKFEKDKGLILTSR        | 3016.4             | 3            | 3.357  | 0.1313 |
| DKNALQNIILYHLTPGVFIGK              | 2355.8             | 3            | 3.3608 | 0.2394 |

| Peptide Sequence                           | Peptide mass (m/z) | Charge State | Xcorr  | DelCn2 |
|--------------------------------------------|--------------------|--------------|--------|--------|
| DKNEATVSTGK                                | 1150.2             | 2            | 3.0216 | 0.2629 |
| DKPELQFPFLQDEDTVATLLECK                    | 2681.0             | 3            | 3.8576 | 0.359  |
| DKPHVNVGTIGHVDHGK                          | 1811.0             | 2            | 3.9864 | 0.4018 |
| DKPHVNVGTIGHVDHGKTTLTAAITK                 | 2712.1             | 3            | 4.3676 | 0.3658 |
| DKPLKDVIADCGK                              | 1515.8             | 2            | 4.6227 | 0.3922 |
| DKPNPQLIYDDEIPSLKIEDTVFHVFDK               | 3317.7             | 3            | 4.7242 | 0.36   |
| DKPSGDTAAVFEEGGDVDDLLDM                    | 2397.5             | 2            | 5.2044 | 0.5087 |
| DKPSGDTAAVFEEGGDVDDLLDMI                   | 2510.7             | 2            | 4.5747 | 0.3836 |
| DKPTAAETTLAVR                              | 1373.5             | 2            | 3.5715 | 0.3788 |
| DKPVKTETKPSVTEK                            | 1687.9             | 2            | 3.532  | 0.3392 |
| DKPVYDELPHYTLSPINGK                        | 2100.4             | 2            | 2.8315 | 0.2432 |
| DKRPEGYNLKEEDGR                            | 1806.9             | 3            | 3.2178 | 0.2365 |
| DKRPLSGPDVGTQPAGLASGAK                     | 2220.5             | 3            | 3.559  | 0.3028 |
| DKSFLAMVVDIVQELK                           | 1836.2             | 2            | 4.2273 | 0.4317 |
| DKSFLAMVVDIVQELKQQNPR                      | 2459.9             | 3            | 3.2692 | 0.1182 |
| DKSYQDAVLEDIFKK                            | 1800.0             | 3            | 4.1959 | 0.2821 |
| DKTSPFELYQFFVR                             | 1778.0             | 2            | 3.1593 | 0.2445 |
| DKTYSYLNKLPVK                              | 1569.8             | 3            | 4.3568 | 0.3112 |
| DKTYSYLNKLPVKSEYPSIK                       | 2374.7             | 3            | 4.0488 | 0.3341 |
| DKVAGHSLGYGFVNYVTAK                        | 2027.3             | 2            | 5.4403 | 0.3946 |
| DKVFQGNFDNDTHRK                            | 1821.9             | 2            | 3.5838 | 0.3253 |
| DKVLTDGSLDSTIPGIENTITVTTEQLTTASFPVGSKK     | 4053.5             | 3            | 6.1274 | 0.4137 |
| DKVMSEFNNFR                                | 1501.6             | 2            | 3.5178 | 0.2546 |
| DKVVALAEGR                                 | 1058.2             | 2            | 2.7739 | 0.2108 |
| DKYEPAAVSEQGDKK                            | 1665.8             | 2            | 4.4847 | 0.3868 |
| DKYGKDATNVGDEGGFAPNILENSEALELVK            | 3295.6             | 3            | 5.2382 | 0.1892 |
| DKYGKDATNVGDEGGFAPNILENSEALELVKEAIDKAGYTEK | 4501.9             | 3            | 3.5733 | 0.1002 |
| DKYPNLQVIGGNVVTAAQAK                       | 2087.4             | 3            | 5.0339 | 0.369  |
| DLAAFDKSHDQAVR                             | 1573.7             | 2            | 2.6897 | 0.1053 |
| DLAALEDKVK                                 | 1102.3             | 2            | 2.6456 | 0.1889 |
| DLAALGDKVNSLGETAER                         | 1860.0             | 2            | 5.1295 | 0.5035 |
| DLADELALVDVIEDKCLKGEMMDLQHGSLFLR           | 3516.0             | 3            | 5.4327 | 0.4859 |
| DLAEDLYDGQVLQK                             | 1607.7             | 2            | 3.5468 | 0.2003 |
| DLAEITTLDR                                 | 1147.3             | 2            | 3.6847 | 0.2445 |
| DLAEVGEGGGHSQAR                            | 1483.5             | 2            | 3.5757 | 0.3455 |
| DLAGIIAIQR                                 | 1070.3             | 2            | 3.2885 | 0.1869 |

| Peptide Sequence            | Peptide mass (m/z) | Charge State | Xcorr  | DelCn2 |
|-----------------------------|--------------------|--------------|--------|--------|
| DLAGSIIGK                   | 874.0              | 1            | 1.9731 | 0.2502 |
| DLAGSIIGKGGQR               | 1272.4             | 2            | 2.9145 | 0.2381 |
| DLAKDITSDTSGDFR             | 1641.7             | 2            | 4.2302 | 0.4096 |
| DLANIAEVEVSIPAKLHNSLIGTK    | 2533.9             | 3            | 3.5357 | 0.1196 |
| DLANQVTGWLDGSAIYGSSHSWSDALR | 2908.1             | 3            | 3.2753 | 0.2718 |
| DLAQALINR                   | 1014.2             | 2            | 3.2931 | 0.1723 |
| DLAQYDAAHHEEFKR             | 1830.9             | 2            | 4.9108 | 0.4799 |
| DLASVQALLR                  | 1086.3             | 2            | 2.6404 | 0.1428 |
| DLATDLSLIEVK                | 1317.5             | 2            | 4.2401 | 0.259  |
| DLAVAGPEMQVK                | 1258.5             | 2            | 3.376  | 0.2871 |
| DLDEDEILGALTEEELR           | 1961.1             | 2            | 4.6971 | 0.2184 |
| DLDELSRYPEDKITPENLPQILLQLK  | 3082.5             | 3            | 5.9259 | 0.3357 |
| DLDELSRYPEDKITPENLPQILLQLKR | 3238.7             | 3            | 6.0108 | 0.4031 |
| DLDIIDNYDYSHTVK             | 1811.9             | 2            | 4.7043 | 0.354  |
| DLDKADSMIR                  | 1164.3             | 2            | 2.4236 | 0.1781 |
| DLDLKKPIYQR                 | 1389.6             | 2            | 2.8812 | 0.2409 |
| DLDNAGELGR                  | 1060.1             | 2            | 3.0776 | 0.1492 |
| DLDQASLAAVSQQLAPR           | 1784.0             | 2            | 4.3936 | 0.3183 |
| DLDRIAGQVAAANK              | 1442.6             | 2            | 4.0232 | 0.1992 |
| DLDRIAGQVAAANKKH            | 1707.9             | 2            | 4.041  | 0.2768 |
| DLEADIIGDTSGHFQK            | 1746.9             | 2            | 5.3816 | 0.4111 |
| DLEAEHVEVEDTTLNR            | 1871.0             | 2            | 5.2863 | 0.548  |
| DLEAHIDSANK                 | 1213.3             | 2            | 3.9359 | 0.3649 |
| DLEAHIDSANKNR               | 1483.6             | 2            | 4.0161 | 0.3259 |
| DLEAHIDSANKNRDEAIK          | 2040.2             | 2            | 4.1649 | 0.3703 |
| DLEASIR                     | 875.0              | 2            | 2.8353 | 0.1093 |
| DLEDKEGEIQAGAK              | 1503.6             | 2            | 4.0076 | 0.3243 |
| DLEDSLAR                    | 919.0              | 2            | 2.5863 | 0.1869 |
| DLEEAEGR                    | 918.9              | 1            | 2.1271 | 0.1206 |
| DLEEEELDMKDR                | 1393.5             | 2            | 2.5205 | 0.1856 |
| DLEEFFSTVGK                 | 1272.4             | 2            | 3.6569 | 0.2502 |
| DLEFTIYDDDDVSPFLEGLEERPQR   | 3000.2             | 3            | 3.7142 | 0.2839 |
| DLEFTIYDDDDVSPFLEGLEERPQRK  | 3128.3             | 3            | 3.8121 | 0.2703 |
| DLEGLHRAEQLHDLQER           | 2147.3             | 3            | 4.2326 | 0.3124 |
| DLEGLSQRHEEKVAAAYDKLEK      | 2459.7             | 3            | 5.126  | 0.3043 |
| DLEGSIDTR                   | 1121.1             | 2            | 3.3955 | 0.2083 |



| Peptide Sequence               | Peptide mass (m/z) | Charge State | Xcorr  | DelCn2 |
|--------------------------------|--------------------|--------------|--------|--------|
| DLEIQALHAR                     | 1166.3             | 2            | 3.3697 | 0.2385 |
| DLEKPFLLPVEAVYSVPGR            | 2130.5             | 2            | 5.0578 | 0.4028 |
| DLELLIQTATR                    | 1273.5             | 2            | 4.0558 | 0.3746 |
| DLEPLKRTEEEPLEEPLDEALVR        | 2722.0             | 3            | 4.871  | 0.2372 |
| DLEQAISQR                      | 1060.1             | 2            | 2.8365 | 0.1677 |
| DLEQPTYR                       | 1022.1             | 2            | 2.5248 | 0.2468 |
| DLESLREYVESQLQR                | 1866.0             | 2            | 4.3551 | 0.2566 |
| DLFAEGLLEFLRPAVQQLDSHVHAVR     | 2962.4             | 3            | 5.3593 | 0.4787 |
| DLFDPIIEDR                     | 1233.4             | 2            | 2.4014 | 0.2667 |
| DLFEDELVPLFEK                  | 1594.8             | 2            | 4.556  | 0.3678 |
| DLFHGATFVPR                    | 1260.4             | 2            | 2.4372 | 0.2066 |
| DLFLHHKK                       | 1038.2             | 2            | 2.5736 | 0.1407 |
| DLFQVAFNR                      | 1110.2             | 2            | 3.6151 | 0.3868 |
| DLFQVIYNVK                     | 1239.4             | 2            | 2.597  | 0.1416 |
| DLFSTFTITR                     | 1201.4             | 2            | 3.5104 | 0.4167 |
| DLGAQDAPAIAFGGSYGGMLSAYLR      | 2502.8             | 3            | 4.2948 | 0.3701 |
| DLGDVGPPIPSPGFSSFPGVDSSTSSSSSR | 3058.2             | 3            | 4.986  | 0.4166 |
| DLGEEALNEYLK                   | 1394.5             | 2            | 3.246  | 0.1417 |
| DLGEELEALKTELEDTL DSTAAQQELR   | 3019.2             | 2            | 5.389  | 0.542  |
| DLGEELEALRGELEDTL DSTNAQQELR   | 3046.2             | 3            | 6.3477 | 0.4776 |
| DLGHAQMVVDELFSSHSDLSDSSELDLDR  | 3019.2             | 3            | 3.5469 | 0.2434 |
| DLGKFQVATDALK                  | 1406.6             | 2            | 4.0303 | 0.283  |
| DLGLAADLPGGAEGAAAQPQAVLRQPELR  | 2886.2             | 3            | 4.3438 | 0.3912 |
| DLGLAQDSATSTK                  | 1307.4             | 2            | 4.2347 | 0.2865 |
| DLGLAQDSATSTKSPILLGSLAHQIYR    | 2857.2             | 3            | 7.0245 | 0.5331 |
| DLGLSESGEDVNAAILDESGK          | 2120.2             | 2            | 3.6881 | 0.3177 |
| DLGLSESGEDVNAAILDESGKK         | 2248.4             | 2            | 5.0902 | 0.4733 |
| DLGMVTILVQDQDTALKELEK          | 2333.7             | 2            | 4.5429 | 0.2812 |
| DLGPHAEGQLAPR                  | 1361.5             | 2            | 2.4054 | 0.2139 |
| DLGTESQIFISR                   | 1366.5             | 2            | 4.0766 | 0.4064 |
| DLHDQFQHQLR                    | 1437.5             | 2            | 3.3181 | 0.2042 |
| DLHIQSHISENRDEVEAVK            | 2220.4             | 2            | 5.5888 | 0.4453 |
| DLHIQSHISENRDEVEAVKNLYPSYK     | 3086.4             | 3            | 5.9998 | 0.3385 |
| DLIADLKYELTGK                  | 1479.7             | 2            | 4.2922 | 0.3877 |
| DLIADLKYELTGKFER               | 1912.2             | 3            | 3.8135 | 0.2472 |
| DLIGHIVEFSQDQHGSR              | 1939.1             | 3            | 3.6532 | 0.1887 |

| Peptide Sequence                 | Peptide mass (m/z) | Charge State | Xcorr  | DelCn2 |
|----------------------------------|--------------------|--------------|--------|--------|
| DLIHDQDEDEEEEEGQR                | 2087.0             | 2            | 3.0376 | 0.204  |
| DLIHGAPVKGKPAANR                 | 1516.7             | 2            | 2.6899 | 0.2804 |
| DLIQDQNMDEK                      | 1349.5             | 2            | 2.7624 | 0.2421 |
| DLISHDEMFSDIYK                   | 1713.9             | 2            | 4.3999 | 0.418  |
| DLISHDEMFSDIYKIR                 | 1983.2             | 3            | 4.8771 | 0.4224 |
| DLISNSPR                         | 902.0              | 2            | 2.6741 | 0.1569 |
| DLKPENILLDEEGHIK                 | 1864.1             | 3            | 5.2732 | 0.2093 |
| DLKPENLLLASK                     | 1341.6             | 2            | 3.1348 | 0.2613 |
| DLKPENVLLDAHMANAK                | 1809.1             | 3            | 4.3526 | 0.2687 |
| DLKPSNIFLVDTK                    | 1490.7             | 2            | 2.676  | 0.2002 |
| DLKPSNILYVDESGNPESIR             | 2247.4             | 2            | 3.0523 | 0.154  |
| DLKVENLLLSNQGTIK                 | 1786.1             | 2            | 3.8251 | 0.2394 |
| DLLDDLKSELTGK                    | 1447.6             | 2            | 3.9446 | 0.3516 |
| DLLDDLKSELTGKFEK                 | 1852.1             | 2            | 4.6585 | 0.4111 |
| DLLDLLVEAK                       | 1129.3             | 2            | 2.8124 | 0.1319 |
| DLLDTVLPPLYNETK                  | 1772.0             | 2            | 4.5667 | 0.3647 |
| DLLEVADVLEK                      | 1244.4             | 2            | 3.854  | 0.2871 |
| DLLFQALGR                        | 1033.2             | 2            | 3.7462 | 0.3062 |
| DLLGETLAQLIR                     | 1342.6             | 2            | 4.3245 | 0.1385 |
| DLLGTVWGGPANLEAIAK               | 1826.1             | 2            | 2.4847 | 0.1765 |
| DLLHPSLEEEK                      | 1310.4             | 2            | 2.7408 | 0.1938 |
| DLLHPSLEEEKKK                    | 1566.8             | 3            | 3.4896 | 0.2878 |
| DLLHPSPEEEK                      | 1294.4             | 2            | 3.0836 | 0.1428 |
| DLLHPSPEEEKR                     | 1450.6             | 2            | 2.7783 | 0.1957 |
| DLLHPSPEEEKRK                    | 1578.8             | 2            | 3.2282 | 0.2602 |
| DLLIAYYVDYK                      | 1620.8             | 2            | 5.0128 | 0.4434 |
| DLLLNTMSQEEK                     | 1421.6             | 2            | 3.1078 | 0.2132 |
| DLLNGVKPQDIDFATTATPTQMKEMFQSAGIR | 3526.0             | 3            | 4.4491 | 0.2249 |
| DLLPSDMAVALLEAQAGTGHIIDPATSAR    | 2935.3             | 3            | 4.5567 | 0.4076 |
| DLLQIIFSFSK                      | 1311.6             | 2            | 3.3798 | 0.2745 |
| DLMLSHLQDNIQHADPPVQILYNR         | 2963.4             | 3            | 4.0948 | 0.1126 |
| DLMTDLKSEISGDLAR                 | 1765.0             | 3            | 5.0189 | 0.3926 |
| DLMVGDEASELR                     | 1335.5             | 2            | 3.2062 | 0.2438 |
| DLNFEVR                          | 893.0              | 2            | 2.5111 | 0.1467 |
| DLNKDGLDKDEIR                    | 1659.8             | 2            | 4.4724 | 0.3766 |
| DLNPDVNVFQR                      | 1317.4             | 2            | 3.4582 | 0.3071 |

| Peptide Sequence               | Peptide mass (m/z) | Charge State | Xcorr  | DelCn2 |
|--------------------------------|--------------------|--------------|--------|--------|
| DLNPEDFWEIIGELGDGAFGK          | 2323.5             | 2            | 5.4135 | 0.4417 |
| DLNQLFQQDSSSR                  | 1538.6             | 2            | 3.4654 | 0.3133 |
| DLNSDMDSILASLK                 | 1522.7             | 1            | 4.4458 | 0.4328 |
| DLNSDMDSILASLKLPPKSEVSSDEDIQFR | 3351.7             | 3            | 5.4222 | 0.3221 |
| DLPEEYLSAIYNEIAGK              | 1926.1             | 2            | 2.975  | 0.2099 |
| DLPEHAVLK                      | 1022.2             | 1            | 1.9711 | 0.2165 |
| DLPELALDTPRAPQLVGQFIAR         | 2421.8             | 3            | 4.1755 | 0.421  |
| DLPETLNELHLDHMK                | 1788.9             | 2            | 3.1311 | 0.1675 |
| DLPETLNELHLDHMKIQAIIELEDLLR    | 3083.4             | 3            | 5.2763 | 0.3927 |
| DLPGALDEKELIEK                 | 1570.8             | 2            | 3.4047 | 0.1348 |
| DLPLAQGIKFQ                    | 1230.4             | 2            | 3.2471 | 0.2754 |
| DLPLLLFR                       | 987.2              | 2            | 2.7834 | 0.1557 |
| DLPQDPVELAMFGLR                | 1702.0             | 2            | 2.8571 | 0.2397 |
| DLPQTMQIQDQFNDLVISDGSSLEDLVVK  | 3364.7             | 3            | 5.1053 | 0.2546 |
| DLPSAGEEILEVESEPR              | 1871.0             | 2            | 3.7278 | 0.2967 |
| DLPVTEAVFSALVTGHAR             | 1884.1             | 2            | 4.7669 | 0.4668 |
| DLQAHINHR                      | 1104.2             | 2            | 2.6419 | 0.1025 |
| DLQGRDEAGEER                   | 1375.4             | 2            | 2.5055 | 0.152  |
| DLQGRDEQSEEKKK                 | 1690.8             | 3            | 4.081  | 0.2159 |
| DLQHPNEFIR                     | 1269.4             | 2            | 2.5398 | 0.192  |
| DLQLVLPDYFPER                  | 1605.8             | 2            | 3.1325 | 0.2961 |
| DLQNVNLTLR                     | 1186.3             | 2            | 4.0442 | 0.2311 |
| DLQQYQSQAK                     | 1209.3             | 2            | 3.5428 | 0.2194 |
| DLQSNVEHLTEK                   | 1413.5             | 2            | 2.619  | 0.1217 |
| DLRNDEHTR                      | 1156.2             | 2            | 2.4633 | 0.2183 |
| DLRQDEHTR                      | 1170.2             | 2            | 2.4412 | 0.2168 |
| DLAAGIGLLAAATQSLSPASLGR        | 2372.7             | 2            | 4.799  | 0.44   |
| DLSDGIHVVK                     | 1083.2             | 2            | 2.4838 | 0.2489 |
| DLSDGIHVVKDAR                  | 1425.6             | 2            | 2.7726 | 0.2591 |
| DLSEELEALKTELEDTLDTTAAQQELR    | 3063.3             | 2            | 5.3174 | 0.4872 |
| DLSELGSR                       | 976.1              | 2            | 3.2045 | 0.126  |
| DLSENNDQRQQLQALSEPQPR          | 2467.6             | 3            | 4.2046 | 0.325  |
| DLSFKDTQLKEYEELLASVR           | 2385.7             | 3            | 4.9689 | 0.4667 |
| DLSKPIGVVNPV                   | 1267.5             | 2            | 2.5056 | 0.1116 |
| DLSLEEIQKKLEAAEER              | 2002.2             | 3            | 4.7188 | 0.3287 |
| DLSLLSHGGR                     | 1055.2             | 2            | 2.8638 | 0.2948 |

| Peptide Sequence               | Peptide mass (m/z) | Charge State | Xcorr  | DelCn2 |
|--------------------------------|--------------------|--------------|--------|--------|
| DLSLNKLGQTDKGGHIIVDEFQNTNVK    | 3156.5             | 3            | 6.5073 | 0.4936 |
| DLSQVRDHLAEAKEK                | 1739.9             | 3            | 3.365  | 0.1036 |
| DLSSHQLNEFLAQLQR               | 2001.2             | 2            | 2.7812 | 0.2004 |
| DLSSEKQEHVK                    | 1387.5             | 2            | 3.8251 | 0.3284 |
| DLSSEPVHAK                     | 1170.3             | 2            | 3.0435 | 0.2012 |
| DLSSVQTLTK                     | 1205.4             | 2            | 3.5213 | 0.2947 |
| DLSTVEALQNLK                   | 1331.5             | 2            | 3.7    | 0.268  |
| DLTALSNMLPK                    | 1203.4             | 2            | 3.192  | 0.2373 |
| DLTDYLMK                       | 999.2              | 1            | 2.9391 | 0.2685 |
| DLTEYLSR                       | 997.1              | 2            | 3.032  | 0.2131 |
| DLTGQVPTPVVK                   | 1254.5             | 2            | 4.2091 | 0.3783 |
| DLTQLPVITSNTIVR                | 1670.9             | 2            | 2.696  | 0.2407 |
| DLTQNTVVSINFKDPQFAEDYIFK       | 2834.1             | 3            | 4.2163 | 0.1641 |
| DLTQTASSTAR                    | 1151.2             | 2            | 3.1325 | 0.3173 |
| DLVDYITTHYK                    | 1368.5             | 2            | 2.4264 | 0.2225 |
| DLVEAVAHILGIR                  | 1406.7             | 2            | 3.4059 | 0.3598 |
| DLVGELGTALR                    | 1144.3             | 2            | 3.9822 | 0.3559 |
| DLVGMGHHFLPSEPTKWNVEDVYEFIR    | 3217.6             | 3            | 3.4416 | 0.2466 |
| DLVHSNKKEQEFR                  | 1630.8             | 2            | 3.4904 | 0.3447 |
| DLVPDLSNFYAQYK                 | 1673.8             | 2            | 3.9094 | 0.4594 |
| DLVSSLTSGLLTIGDR               | 1647.9             | 2            | 4.5135 | 0.423  |
| DLVSSLTSGLLTIGDRFGGALDAAAK     | 2549.9             | 3            | 4.6013 | 0.3513 |
| DLVVLLFETALLSSGFSLEDPQTHSNR    | 2990.3             | 3            | 3.27   | 0.2243 |
| DLWASKNENEEILERPAQLANAR        | 2668.9             | 3            | 3.3362 | 0.2885 |
| DLYANNVLSGGTTMYPGIADR          | 2229.5             | 2            | 3.7096 | 0.2556 |
| DLYANNVMSGGTTMYPGIADR          | 2247.5             | 3            | 3.9735 | 0.2421 |
| DLYANTVLSGGTTMYPGIADR          | 2216.5             | 2            | 5.9896 | 0.5538 |
| DLYDDKDGLRKEELNAISGPNEFAEFYNR  | 3420.6             | 3            | 4.8791 | 0.4189 |
| DLYEDELVPLFEK                  | 1610.8             | 2            | 4.1552 | 0.3234 |
| DLYIDRPLPYLIGSK                | 1764.1             | 2            | 2.7412 | 0.1831 |
| DLYLENPEIK                     | 1234.4             | 2            | 3.5006 | 0.1802 |
| DLYLENPEIKIR                   | 1503.7             | 2            | 3.1686 | 0.2692 |
| DMAEAHKEAMSR                   | 1376.5             | 2            | 3.6075 | 0.3071 |
| DMAGAQAVALNEEFLR               | 1878.1             | 2            | 4.4329 | 0.4011 |
| DMAIATGGAVFGEEGLTLNLEDVQPHDLGK | 3099.4             | 3            | 5.6363 | 0.4103 |
| DMALATKTEVALAK                 | 1462.7             | 2            | 3.522  | 0.2288 |

| Peptide Sequence                   | Peptide mass (m/z) | Charge State | Xcorr  | DelCn2 |
|------------------------------------|--------------------|--------------|--------|--------|
| DMALSDVTEESEIISLVQTVSLGGNYLLNIGPTK | 3738.2             | 3            | 3.5652 | 0.1435 |
| DMANPTALLLSAVMMLR                  | 1848.3             | 2            | 3.9489 | 0.3478 |
| DMDDAYDRLTR                        | 1371.5             | 2            | 2.5398 | 0.1341 |
| DMDLTEVITGTLWNLSSHDSIK             | 2476.7             | 2            | 5.3854 | 0.4497 |
| DMDLVEVNEAFAPQYLAVR                | 2310.6             | 2            | 6.1888 | 0.4725 |
| DMDSIIAEVKAQYEDIANR                | 2182.4             | 2            | 4.4488 | 0.4309 |
| DMEALLPLMNMVIYSIDK                 | 2097.5             | 2            | 2.8163 | 0.2688 |
| DMESPTKLDVTLAK                     | 1548.8             | 2            | 3.7616 | 0.3542 |
| DMGGYSTTTDFIK                      | 1436.6             | 2            | 2.8699 | 0.3185 |
| DMIDLEANFEKIENELKEINTNQEALKR       | 3349.7             | 3            | 6.8683 | 0.3798 |
| DMIILPEMVGSMVGVYNGK                | 2054.5             | 2            | 5.5373 | 0.485  |
| DMILNFAEQNSFK                      | 1557.8             | 2            | 3.2813 | 0.147  |
| DMLGGNGISDEYHVIR                   | 1777.0             | 2            | 4.6329 | 0.3324 |
| DMLLANKVPAAAR                      | 1370.6             | 2            | 3.4931 | 0.1922 |
| DMLLANPHELSELLK                    | 1594.9             | 2            | 3.0073 | 0.1828 |
| DMMELVQPSISGVDLDFKFR               | 2181.5             | 2            | 3.3858 | 0.2304 |
| DMNQVLDAENKKPFYLYTGR               | 2566.9             | 3            | 4.914  | 0.2788 |
| DMQGLSLDAASQPSKGGLLER              | 2174.4             | 3            | 3.3721 | 0.249  |
| DMQGTEEEKAPLALFGHTLVASLEDMK        | 2962.3             | 3            | 4.2714 | 0.2457 |
| DMQHLLTVLTSK                       | 1273.5             | 2            | 3.0911 | 0.3258 |
| DMQHLLTVLTSKR                      | 1429.7             | 3            | 3.8945 | 0.3807 |
| DMQHLLVVWTSEYDPLANNPGWK            | 2601.9             | 3            | 4.5591 | 0.2926 |
| DMQHLLVVWTSEYDPLANNPGWKK           | 2730.1             | 3            | 4.2725 | 0.2396 |
| DMQPSMESDMALVKDMELPTEKEVALVK       | 3166.7             | 3            | 3.9481 | 0.1035 |
| DMRQTVAVGVK                        | 1317.6             | 2            | 2.8351 | 0.1562 |
| DMSGHYQNALYLGDVSR                  | 2056.2             | 2            | 5.4016 | 0.4353 |
| DMSISNTTMDEFQRHLQATGVSLGGVDLTVR    | 3380.8             | 3            | 4.2461 | 0.2895 |
| DMSLYASLTSEKVSLEGEKLSPK            | 2642.0             | 3            | 3.2443 | 0.1386 |
| DMTLPPETNVILTK                     | 1572.8             | 2            | 2.8797 | 0.1776 |
| DMTMFVTASKDNTAK                    | 1660.9             | 2            | 4.1031 | 0.3622 |
| DMTSEQLDDILK                       | 1408.6             | 2            | 2.4248 | 0.147  |
| DMTSEQLDDILKYHTEIVFAR              | 2525.8             | 3            | 3.6053 | 0.1418 |
| DMVGIAQTGSGK                       | 1164.3             | 2            | 3.6272 | 0.3582 |
| DMVGQVAITR                         | 1090.3             | 2            | 3.528  | 0.2936 |
| DNAGAATEEFIK                       | 1266.3             | 2            | 3.71   | 0.2792 |
| DNAGAATEEFIKR                      | 1422.5             | 2            | 3.0304 | 0.3361 |

| Peptide Sequence                 | Peptide mass (m/z) | Charge State | Xcorr  | DelCn2 |
|----------------------------------|--------------------|--------------|--------|--------|
| DNALELSQLENR                     | 1402.5             | 2            | 2.8874 | 0.1811 |
| DNEETGFGSGTR                     | 1270.2             | 2            | 3.1393 | 0.3878 |
| DNERVVGFHVLGPNAGEVTQGFAAALK      | 2798.1             | 3            | 3.9407 | 0.2688 |
| DNFHGLAIFLDYTPNDEETTER           | 2469.6             | 3            | 4.135  | 0.1518 |
| DNFTLIPEGVNGIEER                 | 1804.0             | 2            | 2.9203 | 0.159  |
| DNGKHALIYDDLK                    | 1702.9             | 2            | 3.9382 | 0.4075 |
| DNGKHALIYDDLKQAVAYR              | 2391.7             | 3            | 6.3588 | 0.4279 |
| DNHLLGTFDLTGIPPAPR               | 1935.2             | 2            | 5.6476 | 0.4506 |
| DNHVVAAGGVEK                     | 1196.3             | 2            | 3.4425 | 0.288  |
| DNIISDYDQIIDYVER                 | 1972.1             | 2            | 2.4688 | 0.1329 |
| DNIQGITKPAIR                     | 1326.5             | 2            | 3.6872 | 0.2932 |
| DNLAEDIMR                        | 1077.2             | 2            | 2.9371 | 0.1819 |
| DNLAQQSFNMEQANYTIQSLKDTK         | 2789.0             | 3            | 4.0514 | 0.1782 |
| DNLEFFLAGIGR                     | 1352.5             | 2            | 4.2031 | 0.3495 |
| DNLT LWTS DMQGDGEEQNKEALQDVEDENQ | 3453.5             | 3            | 5.1019 | 0.4363 |
| DNLT LWTS DQQDDDDGGEGNN          | 2195.1             | 2            | 4.1233 | 0.4479 |
| DNLT LWTS DTQGDEAEAGEGGEN        | 2410.4             | 2            | 6.1575 | 0.3897 |
| DNLT LWTS ENQGDEGDAGEGEN         | 2352.3             | 2            | 5.4193 | 0.5381 |
| DNMNDNFLEGEENELTLNEK             | 2498.6             | 2            | 5.6957 | 0.436  |
| DNNGVIGLLEPMKK                   | 1528.8             | 2            | 2.6416 | 0.2851 |
| DNNQFASASLDR                     | 1338.4             | 2            | 3.1543 | 0.2457 |
| DNPGNFVKTEETLFEIQGIDPIASAIQNLK   | 3303.7             | 3            | 3.906  | 0.3505 |
| DNQLSEVANKFAK                    | 1464.6             | 2            | 3.5298 | 0.2324 |
| DNSNIILLGDSQGDLR                 | 1730.9             | 2            | 3.9729 | 0.372  |
| DNSTMGYMAAK                      | 1189.3             | 2            | 3.5779 | 0.3459 |
| DNSTMGYMAAKK                     | 1317.5             | 2            | 2.7017 | 0.235  |
| DNSTMGYMMAK                      | 1249.5             | 2            | 3.3222 | 0.2525 |
| DNTINLIHTFR                      | 1344.5             | 2            | 3.4336 | 0.3261 |
| DNTNEIYSGK                       | 1141.2             | 2            | 3.0025 | 0.2667 |
| DNTQLLINQLWQLPTERVEEAIVAR        | 2951.3             | 3            | 3.7032 | 0.2189 |
| DNTYLVELSSLLVR                   | 1622.8             | 2            | 3.9861 | 0.3236 |
| DNVTSPLPSLLVVIAAIFIGFFLGK        | 2633.2             | 3            | 3.8928 | 0.2126 |
| DNYPGFSYADFGPQFTAR               | 2151.3             | 2            | 4.9466 | 0.5139 |
| DNYVPEVSALDQEIIIVDPDTK           | 2490.7             | 2            | 5.276  | 0.4445 |
| DNYVPEVSALDQEIIIVDPDTKEMLK       | 2992.3             | 2            | 3.5473 | 0.1855 |
| DPADASEAHSSSR                    | 1459.4             | 2            | 4.3523 | 0.4603 |

| Peptide Sequence            | Peptide mass (m/z) | Charge State | Xcorr  | DelCn2 |
|-----------------------------|--------------------|--------------|--------|--------|
| DPAGMPHPETK                 | 1180.3             | 2            | 2.6036 | 0.1974 |
| DPDAGIDEAQVEQDAQALFQAGELK   | 2659.8             | 2            | 5.9682 | 0.4917 |
| DPDAQPGGELMLGGTDSK          | 1788.9             | 2            | 5.5433 | 0.5203 |
| DPDAQPGGELMLGGTDSKYYK       | 2243.4             | 2            | 4.413  | 0.4219 |
| DPDQTDGLGLSYLSSHIANVER      | 2388.5             | 3            | 4.4546 | 0.372  |
| DPEAPIFQVADYGIVADLFK        | 2209.5             | 3            | 3.4518 | 0.3615 |
| DPENFPFVVLGNK               | 1476.7             | 2            | 4.2264 | 0.3057 |
| DPENFPFVVLGNKIDLENR         | 2217.5             | 3            | 3.9078 | 0.2856 |
| DPFAHLPK                    | 925.1              | 2            | 2.4227 | 0.222  |
| DPGENYNLLGGVAGATPEVLQALK    | 2427.7             | 2            | 3.7952 | 0.2898 |
| DPGTVANKKEEEDLAK            | 1744.9             | 2            | 3.1991 | 0.2979 |
| DPGVITYDLPTPPGEK            | 1699.9             | 2            | 4.1696 | 0.4461 |
| DPLVIELGQK                  | 1112.3             | 2            | 3.8    | 0.2484 |
| DPNGLPPEAQK                 | 1166.3             | 2            | 3.3268 | 0.2474 |
| DPNIVIAK                    | 870.0              | 1            | 2.4863 | 0.1271 |
| DPNLPLLPTRNLSVVK            | 1779.1             | 2            | 2.7302 | 0.1017 |
| DPNSPLYSVK                  | 1120.2             | 2            | 2.8387 | 0.1576 |
| DPSQELEFIADILNQDAK          | 2047.2             | 2            | 4.7183 | 0.3958 |
| DPSQQELPR                   | 1070.1             | 2            | 2.8602 | 0.2208 |
| DPVASSLSPYFGTK              | 1469.6             | 2            | 2.8884 | 0.2246 |
| DPVQEAWAEDVDLR              | 1643.7             | 2            | 3.3029 | 0.3771 |
| DPVRDFPFELIPEPPEGGLPGPWALHR | 3040.4             | 3            | 4.1241 | 0.1348 |
| DQALTEEHAR                  | 1170.2             | 2            | 2.5597 | 0.1718 |
| DQAVENILVSPVVVASSLGLVSLGGK  | 2552.9             | 3            | 5.5129 | 0.5048 |
| DQAVFPQNGLVVSSVDVQSVEPVDQR  | 2814.1             | 3            | 4.7627 | 0.333  |
| DQEGQDVLLFIDNIFR            | 1923.1             | 2            | 5.877  | 0.4854 |
| DQETLHSHGVR                 | 1279.3             | 2            | 3.1508 | 0.3067 |
| DQGELERQLLQANPILEAFGNAK     | 2555.8             | 3            | 4.1134 | 0.1626 |
| DQGGAGEGLVR                 | 1059.1             | 2            | 2.4859 | 0.1466 |
| DQGTIEDYVEGLR               | 1545.6             | 2            | 3.7765 | 0.454  |
| DQHDTFFLRDPAEALQLPMDYVQR    | 2907.2             | 3            | 5.6807 | 0.3858 |
| DQHPSKIPVIER                | 1532.8             | 3            | 3.4342 | 0.3767 |
| DQITAGNAAR                  | 1017.1             | 2            | 3.2476 | 0.2025 |
| DQKKTQEQLALEMAELTAR         | 2204.5             | 3            | 5.5958 | 0.4774 |
| DQLLLGPTYATPK               | 1417.6             | 2            | 3.8071 | 0.2896 |
| DQLNDQYLELLEK               | 1621.8             | 2            | 3.2588 | 0.1583 |

| Peptide Sequence                    | Peptide mass (m/z) | Charge State | Xcorr  | DelCn2 |
|-------------------------------------|--------------------|--------------|--------|--------|
| DQLQTFSEEHPVLLTEAPLNPR              | 2535.8             | 3            | 5.6264 | 0.3526 |
| DQLQTFSEEHPVLLTEAPLNPSK             | 2594.9             | 3            | 4.9977 | 0.3056 |
| DQLSDDVSKVIAYLK                     | 1694.9             | 2            | 2.9579 | 0.1911 |
| DQLSDDVSKVIAYLKR                    | 1851.1             | 3            | 4.9262 | 0.363  |
| DQLSVLENGVDIVVGTPGR                 | 1969.2             | 2            | 4.6123 | 0.2911 |
| DQLSVLENGVDIVVGTPGRLLDLVSTGK        | 2898.2             | 3            | 4.4976 | 0.3334 |
| DQLSVLENGVDIVVGTPGRLLDLVSTGKLNLSQVR | 3709.2             | 3            | 5.8539 | 0.4012 |
| DQNGNHVVQK                          | 1139.2             | 2            | 2.6579 | 0.111  |
| DQNILLGTTYR                         | 1294.4             | 2            | 3.5067 | 0.1554 |
| DQNTVETLQR                          | 1204.3             | 2            | 3.3862 | 0.3045 |
| DQNVFVAQK                           | 1049.2             | 2            | 2.8426 | 0.2707 |
| DQPLDSSHASIR                        | 1439.6             | 2            | 2.6383 | 0.2975 |
| DQQEALVDMVNDGVEDLR                  | 2118.3             | 2            | 6.6827 | 0.5739 |
| DQQQKPLYHHFTTAINTENIR               | 2555.8             | 3            | 4.1598 | 0.3519 |
| DQQVEAAQR                           | 1045.1             | 2            | 3.175  | 0.1934 |
| DQTASAPATPLVNK                      | 1413.6             | 2            | 2.761  | 0.212  |
| DQTDDQVTIDSALATQK                   | 1849.9             | 2            | 5.6133 | 0.4581 |
| DQTVSDNELQEMSNQGSK                  | 2011.1             | 2            | 5.7902 | 0.4916 |
| DQVANSAFVER                         | 1236.3             | 2            | 3.932  | 0.3574 |
| DQWEDRIQVWHAHR                      | 2006.1             | 3            | 3.7095 | 0.3034 |
| DRADQTVLTEDEKKELENLAAMDLELQK        | 3247.6             | 3            | 6.5015 | 0.396  |
| DRAEAEAR                            | 917.9              | 1            | 1.6565 | 0.1312 |
| DRANMQHR                            | 1028.1             | 2            | 2.8214 | 0.1762 |
| DRDHFQLGSLSHLLNAK                   | 1952.2             | 3            | 4.4697 | 0.2611 |
| DRDNDSDDVESNLLLPGIALR               | 2399.6             | 2            | 3.2231 | 0.1504 |
| DRDNQDREENDKDPER                    | 2032.0             | 2            | 3.4461 | 0.2159 |
| DRDVDVLSAALKEQLSHSR                 | 2140.3             | 3            | 3.4493 | 0.1819 |
| DRDVTFSPATIENELIK                   | 1949.2             | 2            | 4.4728 | 0.3475 |
| DRDYSDHPSGGSYR                      | 1612.6             | 2            | 3.6648 | 0.3071 |
| DREAAEGLGSHER                       | 1427.5             | 2            | 4.2461 | 0.2751 |
| DREDDQYSHLQGNQLR                    | 1975.0             | 2            | 3.0551 | 0.1655 |
| DREEALHQFR                          | 1301.4             | 2            | 3.5428 | 0.2633 |
| DREGFFTNGTLGAK                      | 1626.8             | 2            | 5.0741 | 0.4305 |
| DREVGIPPEQSLETAK                    | 1769.9             | 2            | 4.7032 | 0.4597 |
| DRFHEQFHSLR                         | 1472.6             | 2            | 3.0208 | 0.2682 |
| DRFSAEDEALSNIAREAEARLAAKRAAR        | 3089.4             | 3            | 4.3446 | 0.1289 |



| Peptide Sequence                    | Peptide mass (m/z) | Charge State | Xcorr  | DelCn2 |
|-------------------------------------|--------------------|--------------|--------|--------|
| DRGSGLLGSQPQPVIPASVIPEELISQAQVVLQGK | 3613.1             | 3            | 4.0003 | 0.3992 |
| DRHFAGDVLGYVTPWNSHGYDVTK            | 2736.0             | 3            | 5.0831 | 0.3394 |
| DRKESLDVYELDAK                      | 1681.8             | 2            | 4.1941 | 0.3401 |
| DRLLLATMESMNGGK                     | 1636.9             | 2            | 4.808  | 0.4018 |
| DRLPDAAAPESLPGQGR                   | 1750.9             | 2            | 2.6158 | 0.114  |
| DRLTSKEEELKDIQNMNFK                 | 2565.9             | 3            | 4.5304 | 0.1203 |
| DRLVPGPVFGSK                        | 1272.5             | 2            | 3.1759 | 0.1272 |
| DRPFFAGLVK                          | 1150.4             | 2            | 2.8226 | 0.2338 |
| DRPFFPGLVK                          | 1176.4             | 2            | 2.7296 | 0.2505 |
| DRPFKPYNFLAHGVLPSGHLHPLLK           | 2970.4             | 3            | 4.4679 | 0.3273 |
| DRPMEESSLLFEAMR                     | 1838.1             | 2            | 3.4194 | 0.1271 |
| DRTQIALSPNNHEVHIYKK                 | 2264.5             | 3            | 3.4225 | 0.1905 |
| DRVPTYQYNMNFVK                      | 1806.0             | 2            | 3.23   | 0.2039 |
| DRVTSAVEALLSADSASR                  | 1849.0             | 3            | 3.5918 | 0.2383 |
| DRYDSFIELQEK                        | 1543.7             | 2            | 3.5815 | 0.1016 |
| DRYFVEETVEVIR                       | 1655.8             | 2            | 2.8175 | 0.1669 |
| DSAAAVVVYDITNVNSFQQTTK              | 2372.6             | 3            | 4.0526 | 0.1712 |
| DSAIGFSR                            | 852.9              | 2            | 2.5697 | 0.1469 |
| DSALETLQGQLEEKAEELGHSQSALASAQR      | 3197.4             | 3            | 6.3856 | 0.4741 |
| DSALNLFNDPMWNQQWYLQDTR              | 2757.0             | 3            | 3.4076 | 0.1501 |
| DSAQESVITR                          | 1106.2             | 2            | 3.2225 | 0.1929 |
| DSAQTSVTQAQR                        | 1292.3             | 2            | 3.6926 | 0.2942 |
| DSASFNPELLTHILDGSPEK                | 2171.3             | 2            | 4.335  | 0.3025 |
| DSASFNPELLTHILDGSPEKTR              | 2428.6             | 3            | 3.2438 | 0.1161 |
| DSAVAISGADSR                        | 1149.2             | 2            | 3.7539 | 0.4848 |
| DSDEADLVLAK                         | 1176.3             | 2            | 2.4187 | 0.1726 |
| DSDLSHVQNK                          | 1143.2             | 2            | 3.2094 | 0.1896 |
| DSDSSVLTR                           | 980.0              | 2            | 2.4899 | 0.1109 |
| DSEMGQQSLLFQIDYPEIAEGIMPR           | 2869.2             | 2            | 3.1653 | 0.1936 |
| DSENKGPAFVNPLIPESPEEEELFR           | 2845.1             | 3            | 3.4708 | 0.1012 |
| DSEQVAELKQELATLK                    | 1803.0             | 2            | 4.2817 | 0.3759 |
| DSEQVAELKQELATLKSQNLNSQSVEITK       | 3118.4             | 3            | 6.874  | 0.5211 |
| DSESADAGGAQR                        | 1164.1             | 2            | 3.2152 | 0.3414 |
| DSETGENIR                           | 1021.0             | 2            | 2.5967 | 0.1639 |
| DSFDDRGPVSLNPVLDYDHGSR              | 2363.4             | 3            | 4.9778 | 0.2223 |
| DSFKAGGSASAMLQPLLDNQVGFK            | 2482.8             | 2            | 5.6443 | 0.4961 |

| Peptide Sequence                     | Peptide mass (m/z) | Charge State | Xcorr  | DelCn2 |
|--------------------------------------|--------------------|--------------|--------|--------|
| DSFLKDGQPFR                          | 1310.4             | 2            | 2.9452 | 0.246  |
| DSFQEVLR                             | 994.1              | 1            | 2.251  | 0.1184 |
| DSGEEAAEPSAPSR                       | 1403.4             | 2            | 2.6002 | 0.1187 |
| DSGKSEESSHYSTEKESEK                  | 2145.1             | 3            | 3.7295 | 0.2717 |
| DSGPLSDPITGKPYVPLLEAEEVR             | 2583.9             | 3            | 3.6268 | 0.1979 |
| DSGQAFSLEQLRPLLASSLPLAAR             | 2541.9             | 3            | 3.5664 | 0.2015 |
| DSGSDGHSVSSR                         | 1191.1             | 2            | 3.2125 | 0.3568 |
| DSGTLQSQEAK                          | 1164.2             | 2            | 3.7868 | 0.2359 |
| DSHGVAQVR                            | 969.0              | 1            | 2.5406 | 0.263  |
| DSHRDVQAGSHDYPGEGIYLLK               | 2458.6             | 3            | 4.0367 | 0.2443 |
| DSHTDShLHTR                          | 1306.3             | 2            | 2.8367 | 0.1795 |
| DSIFSNLTGQLDYQGFEEK                  | 2063.2             | 2            | 5.7076 | 0.5055 |
| DSIFSNLTGQLDYQGFEEKADMVIEAVFEDLSLK   | 3725.1             | 3            | 4.1505 | 0.3209 |
| DSIFSNLTGQLDYQGFEEKADMVIEAVFEDLSLKHR | 4018.5             | 3            | 4.6969 | 0.3498 |
| DSIKLDDDSER                          | 1293.3             | 2            | 2.8238 | 0.3173 |
| DSIVAELDREMSR                        | 1521.7             | 2            | 3.0072 | 0.1792 |
| DSIVHQAGMLKR                         | 1355.6             | 2            | 2.7041 | 0.1038 |
| DSLAEATR                             | 862.9              | 2            | 2.4568 | 0.1259 |
| DSLALARPK                            | 971.1              | 2            | 2.7574 | 0.1354 |
| DSLDPSTHAMQLLTAEIEK                  | 2247.5             | 2            | 5.902  | 0.4709 |
| DSL GAYASQDANEQQDLGKR                | 2224.3             | 3            | 3.4689 | 0.2549 |
| DSLIFLVDASK                          | 1208.4             | 2            | 4.3749 | 0.4349 |
| DSL IQSLATQLELDGFERGPFSEK            | 2709.9             | 3            | 3.5189 | 0.2932 |
| DSLLQDGEFSMDLR                       | 1626.8             | 2            | 4.8137 | 0.3822 |
| DSLSEEDWMR                           | 1268.3             | 2            | 3.5059 | 0.257  |
| DSL SVNEFKELVTQQLPHLLK               | 2439.8             | 3            | 4.2687 | 0.2997 |
| DSLYAQGR                             | 910.0              | 2            | 3.1071 | 0.3444 |
| DSNFAGDLVR                           | 1094.2             | 2            | 3.2534 | 0.1426 |
| DSNGAILVYDITDEDSFQK                  | 2131.2             | 2            | 4.6444 | 0.3896 |
| DSNTILLPSNPGDVTSMVAQAMGVYGALTK       | 3052.5             | 3            | 3.9538 | 0.3842 |
| DSNYHLLMSVQESLER                     | 1922.1             | 2            | 5.3471 | 0.336  |
| DSNYHLLMSVQESLERK                    | 2050.3             | 3            | 3.9082 | 0.1892 |
| DSPLDFIESCLR                         | 1542.7             | 2            | 3.3305 | 0.2676 |
| DSPLQGSGQQNSQAGQR                    | 1758.8             | 2            | 4.2357 | 0.4451 |
| DSPSVWAAVPGK                         | 1214.4             | 1            | 2.5055 | 0.2568 |
| DSPSYGSLSR                           | 1069.1             | 2            | 2.8205 | 0.3059 |

| Peptide Sequence                 | Peptide mass (m/z) | Charge State | Xcorr  | DelCn2 |
|----------------------------------|--------------------|--------------|--------|--------|
| DSQDAGGFGPEDR                    | 1351.3             | 2            | 3.6455 | 0.2428 |
| DSQDGSSYR                        | 1015.0             | 2            | 2.5621 | 0.1391 |
| DSQEDLQER                        | 1120.1             | 2            | 2.6519 | 0.1221 |
| DSQEEEEKTEALTSAK                 | 1666.7             | 2            | 4.3279 | 0.2485 |
| DSQGHGRDLAAGIGLLAAATQSLSMPASLGR  | 3110.5             | 3            | 3.7001 | 0.3227 |
| DSQLYAVDYETLTRPFSGR              | 2219.4             | 3            | 3.7196 | 0.3555 |
| DSQMQNPPYSR                      | 1226.3             | 2            | 3.1032 | 0.2187 |
| DSQNPLLMWAAPDPATGQNGPR           | 2337.6             | 3            | 4.5486 | 0.3384 |
| DSQSPNTATQR                      | 1205.2             | 2            | 2.7324 | 0.3142 |
| DSQTQAILTK                       | 1105.2             | 2            | 2.4186 | 0.2334 |
| DSREHEEPTTSEMAEETYSRK            | 2454.5             | 3            | 5.0483 | 0.3734 |
| DSRPSQAAGDNQGDDEVKEQTFSGGTSQDTK  | 3142.2             | 3            | 6.1158 | 0.4783 |
| DSSDQNFDFYMFK                    | 1497.6             | 2            | 2.7153 | 0.1534 |
| DSSGNKIMHPVSGK                   | 1457.6             | 2            | 3.2388 | 0.3052 |
| DSSGNLHGYVAEGGAK                 | 1562.6             | 2            | 3.2772 | 0.2903 |
| DSSGQHVDVSPTSQR                  | 1600.6             | 2            | 3.6631 | 0.4372 |
| DSSLEADHVISAIPASVLSSELLPAEAAPLAR | 3144.5             | 3            | 3.4576 | 0.1426 |
| DSSPHFQAEQR                      | 1302.3             | 2            | 2.7135 | 0.3166 |
| DSSQVHPLAVLLLTGDVHIR             | 2286.6             | 3            | 3.8861 | 0.2688 |
| DSSRLPSEGPRPAHVVVGDVLAADVDK      | 2916.2             | 3            | 3.6333 | 0.4094 |
| DSSSTNLESMDTS                    | 1374.4             | 2            | 3.5129 | 0.3093 |
| DSSTSPGDYVLSVSENSR               | 1900.9             | 2            | 2.5164 | 0.1219 |
| DSTIHVEENGQSSESR                 | 1775.8             | 3            | 3.8388 | 0.3189 |
| DSTLIMQLLR                       | 1190.4             | 2            | 3.6715 | 0.1671 |
| DSTVAVVVYDITNLNSFQQTSK           | 2430.7             | 3            | 3.9761 | 0.1459 |
| DSVAAGKPK                        | 873.0              | 2            | 3.0645 | 0.1073 |
| DSVADPHNLK                       | 1096.2             | 2            | 2.6579 | 0.2158 |
| DSVPKPSVFLHPDLGVGGAER            | 2291.6             | 3            | 3.3109 | 0.1463 |
| DSVVLNFPFMAFNPDPK                | 2053.3             | 3            | 4.006  | 0.2934 |
| DSVVLNFPFMAFNPDPKSEYNDQLTR       | 3160.5             | 3            | 3.8106 | 0.2464 |
| DSYESYGNSR                       | 1178.1             | 2            | 3.3994 | 0.3699 |
| DSYLILETLPTHEYDSR                | 1916.1             | 2            | 5.187  | 0.3569 |
| DSYVGDEAQSK                      | 1199.2             | 2            | 3.7627 | 0.4199 |
| DSYVGDEAQSKR                     | 1355.4             | 2            | 3.5406 | 0.4355 |
| DTANWLEINPDTGAISTR               | 1975.1             | 2            | 2.7624 | 0.1995 |
| DTAQQGVVNFYDDFIQCVMSV            | 2477.8             | 2            | 3.2249 | 0.1096 |

| Peptide Sequence                  | Peptide mass (m/z) | Charge State | Xcorr  | DelCn2 |
|-----------------------------------|--------------------|--------------|--------|--------|
| DTASLSTTPSESPR                    | 1449.5             | 2            | 3.5703 | 0.2934 |
| DTAVQGNIR                         | 974.1              | 2            | 2.5804 | 0.103  |
| DTDAAVGDNIGYITFVLFPR              | 2185.4             | 3            | 4.3993 | 0.3898 |
| DTDISIKPEGVREPKPAPVEGK            | 2478.7             | 3            | 3.7839 | 0.1966 |
| DTEEDDFHVDQVTTVK                  | 1893.0             | 2            | 5.072  | 0.3792 |
| DTEGHLVR                          | 927.0              | 2            | 2.4053 | 0.1555 |
| DTFNHLTTWLEDAR                    | 1719.8             | 2            | 3.6036 | 0.3916 |
| DTFYKEQLER                        | 1329.4             | 2            | 2.6053 | 0.2593 |
| DTFYKQPMFYHLGHFSK                 | 2147.4             | 2            | 3.3605 | 0.3017 |
| DTGAALLAESR                       | 1104.2             | 2            | 3.4064 | 0.2823 |
| DTGEGYQTPNIILDIQPGGNHVIEDSHKK     | 3177.4             | 3            | 4.0454 | 0.2977 |
| DTGEKLTVAENEAETKLQAILEDIQVTLFTR   | 3477.9             | 3            | 6.4134 | 0.4621 |
| DTGIFLDMHLK                       | 1403.7             | 2            | 4.312  | 0.3205 |
| DTGKTPVEPEVAIHR                   | 1649.8             | 3            | 4.8745 | 0.3952 |
| DTGNIGQER                         | 990.0              | 2            | 2.7276 | 0.1658 |
| DTGQLYAALHHR                      | 1382.5             | 2            | 3.0974 | 0.3069 |
| DTHEDHDTSTENTDESNHDPQFEPVSLPEQEIK | 3936.0             | 3            | 5.9088 | 0.375  |
| DTHLTITPTVLGER                    | 1553.7             | 2            | 3.1663 | 0.26   |
| DTIGKETFHFPVPEHHLIK               | 2246.6             | 2            | 3.0091 | 0.2    |
| DTINLLDQR                         | 1088.2             | 2            | 3.6555 | 0.1567 |
| DTLENTIGHR                        | 1156.2             | 2            | 2.8249 | 0.2085 |
| DTLNKDHGNDKESNVLHQ                | 2065.1             | 3            | 3.6333 | 0.1549 |
| DTLVQGLNEAGDDLEAVAK               | 1959.1             | 2            | 4.8515 | 0.2628 |
| DTLYEAVR                          | 967.1              | 2            | 2.6194 | 0.2331 |
| DTLYEAVREVLHGNQR                  | 1901.1             | 3            | 4.5237 | 0.3607 |
| DTNGENIAESLVAEGLATR               | 1961.1             | 2            | 5.3577 | 0.38   |
| DTNGSQFFITTVK                     | 1458.6             | 2            | 4.5725 | 0.4265 |
| DTPALFNFTTQELSSNPPLATILIPPHAR     | 3163.6             | 3            | 3.2169 | 0.1728 |
| DTPGFIVNR                         | 1019.1             | 1            | 2.717  | 0.2672 |
| DTPGLHIGKPENK                     | 1406.6             | 2            | 2.7291 | 0.1839 |
| DTPTSAGPNSFNK                     | 1336.4             | 2            | 3.3008 | 0.3829 |
| DTQSGSLLFIGR                      | 1294.4             | 2            | 3.9722 | 0.2887 |
| DTSASAVAVGLK                      | 1119.3             | 2            | 3.8534 | 0.3561 |
| DTSASAVAVGLKQGK                   | 1432.6             | 2            | 3.4388 | 0.3808 |
| DTSFLGSDDIGK                      | 1255.3             | 2            | 2.8096 | 0.1453 |
| DTSFLGSDDIGNIDVR                  | 1724.8             | 2            | 3.0057 | 0.1816 |

| Peptide Sequence                      | Peptide mass (m/z) | Charge State | Xcorr  | DelCn2 |
|---------------------------------------|--------------------|--------------|--------|--------|
| DTSFSGLSLEEYK                         | 1476.6             | 2            | 3.6112 | 0.448  |
| DTSNHFHVFGDLSPEITTEDIK                | 2602.8             | 3            | 4.6028 | 0.2741 |
| DTSPGSAYQEGGGLYALGLIHANHGDDIIDYLLNQLK | 3873.2             | 3            | 3.8663 | 0.3209 |
| DTSSSTVVSTQR                          | 1268.3             | 2            | 3.4795 | 0.2905 |
| DTSYLFITGPDVVK                        | 1555.8             | 2            | 3.7999 | 0.3043 |
| DTVATQLSEAVDATR                       | 1577.7             | 2            | 4.2122 | 0.4239 |
| DTYIENEK                              | 1012.1             | 2            | 2.6084 | 0.1263 |
| DTYIENEKLISGK                         | 1510.7             | 2            | 3.696  | 0.2259 |
| DVAFTVGEGEDHDIPIGIDK                  | 2128.3             | 2            | 3.6141 | 0.3117 |
| DVAHGILNEAYRK                         | 1486.7             | 2            | 3.5874 | 0.2921 |
| DVAPQAPVHFLVIPK                       | 1631.9             | 2            | 3.1028 | 0.2562 |
| DVAQLGDVVHGVESLVELLWTEEMRDLVQR        | 3494.9             | 3            | 3.6132 | 0.1192 |
| DVAVAEEVR                             | 988.1              | 2            | 2.8747 | 0.1648 |
| DVAYQYVK                              | 986.1              | 1            | 2.1883 | 0.1773 |
| DVDAAYMSK                             | 1000.1             | 1            | 2.5611 | 0.3238 |
| DVDAAYMSKVELEAKVDALNDEINFLR           | 3070.4             | 3            | 6.4964 | 0.4801 |
| DVDEAYMNK                             | 1085.2             | 1            | 3.2905 | 0.3555 |
| DVDEAYMNKVELESR                       | 1799.0             | 2            | 4.5597 | 0.4786 |
| DVDEAYMNKVELESRLLEGLTDEINFLR          | 3200.5             | 3            | 5.1706 | 0.4672 |
| DVDEIEAWISEKLQTASDESYKDPTNIQSK        | 3441.7             | 3            | 3.4171 | 0.1142 |
| DVDFEGTDEPIFGK                        | 1569.7             | 2            | 2.8836 | 0.1699 |
| DVDFELIKVEGK                          | 1392.6             | 2            | 3.7845 | 0.2575 |
| DVDIIDHHDNTYTVK                       | 1785.9             | 2            | 3.5634 | 0.395  |
| DVDLEFLAK                             | 1050.2             | 2            | 2.9052 | 0.1955 |
| DVDRIIGLDQVAGMSETALPGAFK              | 2504.8             | 3            | 3.5921 | 0.2901 |
| DVDRTDNQDMFTSSHIR                     | 2038.1             | 2            | 2.8812 | 0.1561 |
| DVEDFLSPLL GK                         | 1333.5             | 2            | 3.8539 | 0.3477 |
| DVEFLVQLK                             | 1091.3             | 2            | 2.9449 | 0.1453 |
| DVESDSAKQLQAEEAIDDIPFGITSNSDVFSK      | 3546.8             | 3            | 5.9891 | 0.4804 |
| DVFANYLTSNFQAPGVK                     | 1872.1             | 2            | 2.759  | 0.1877 |
| DVFISAAERDVYTG DALR                   | 1999.2             | 2            | 3.0187 | 0.211  |
| DVFLGMFLYEYAR                         | 1624.9             | 2            | 4.0653 | 0.4282 |
| DVFLPKPTWGNHTPIFR                     | 2026.3             | 3            | 3.5513 | 0.364  |
| DVFNKGYGFGMVK                         | 1462.7             | 2            | 3.5302 | 0.2868 |
| DVFQHSQSR                             | 1104.2             | 2            | 2.658  | 0.1457 |
| DVFTKGYGFGLIK                         | 1445.7             | 2            | 3.4374 | 0.3426 |

| Peptide Sequence                 | Peptide mass (m/z) | Charge State | Xcorr  | DelCn2 |
|----------------------------------|--------------------|--------------|--------|--------|
| DVGAQILLHSHK                     | 1318.5             | 2            | 2.7936 | 0.1398 |
| DVGAQILLHSHKK                    | 1446.7             | 2            | 4.0096 | 0.3548 |
| DVGAYSK                          | 739.8              | 1            | 2.3944 | 0.2201 |
| DVGGEGVQQGLLK                    | 1300.4             | 2            | 3.8776 | 0.2854 |
| DVGLEVLNALLALQGPTAAQVLQAGVADDLRK | 3375.8             | 3            | 3.678  | 0.2445 |
| DVGLKKEDIAMWEVNEAFSLVVLANIK      | 3033.5             | 3            | 4.6635 | 0.2579 |
| DVGPHRDLVGELGTALR                | 1806.0             | 3            | 4.7433 | 0.3049 |
| DVGPLSKKGFYLAQFDVGACIALVSVRVFYK  | 3393.0             | 3            | 3.2304 | 0.2505 |
| DVGRPQPGRENFQNWLK                | 2042.2             | 2            | 3.3575 | 0.2339 |
| DVHNIYGLYVHMATADGLR              | 2146.4             | 3            | 5.1552 | 0.4401 |
| DVIAQSQSGTGK                     | 1191.3             | 2            | 3.0588 | 0.2543 |
| DVIEEYFK                         | 1043.2             | 1            | 2.1575 | 0.2051 |
| DVILADLLPSLAVYLR                 | 1772.1             | 2            | 2.6463 | 0.2107 |
| DVISQTIPNPDLDWVKNAQK             | 2282.5             | 3            | 3.3498 | 0.1084 |
| DVKDGKYSQVLANGLDNKLREDLER        | 2877.2             | 3            | 3.5598 | 0.1794 |
| DVKDKETTENENTK                   | 1651.7             | 2            | 4.8215 | 0.2803 |
| DVKDKETTENENTKFEVR               | 2183.3             | 3            | 3.8282 | 0.2696 |
| DVKGESLFHSK                      | 1247.4             | 2            | 2.5148 | 0.1782 |
| DVKPSNILVNSR                     | 1342.5             | 2            | 2.7433 | 0.1007 |
| DVLFLKDCVGPEVEKACANPAAGSVILLENLR | 3385.9             | 3            | 4.8936 | 0.3677 |
| DVLNDTAPR                        | 1001.1             | 2            | 2.7081 | 0.2198 |
| DVLSVAFSSDNR                     | 1310.4             | 2            | 4.368  | 0.4853 |
| DVMQQQLAEYQELLDVK                | 2051.3             | 2            | 4.4567 | 0.307  |
| DVNAAIAAIK                       | 986.1              | 2            | 3.6509 | 0.2784 |
| DVNAAIATIK                       | 1016.2             | 2            | 3.6678 | 0.3269 |
| DVNAAIATIKTK                     | 1245.5             | 2            | 3.9268 | 0.219  |
| DVNFEFPEFQL                      | 1385.5             | 2            | 3.644  | 0.2471 |
| DVNGELIAVQR                      | 1214.4             | 2            | 2.6185 | 0.2408 |
| DVNQQEFVR                        | 1135.2             | 2            | 2.9467 | 0.1546 |
| DVPAVEITHTFWER                   | 1700.9             | 2            | 3.4413 | 0.3867 |
| DVPAYSQDTFKVHYENNSPFLTITSMTR     | 3263.6             | 3            | 4.7984 | 0.2396 |
| DVPDLTLIDLPGITR                  | 1638.9             | 2            | 3.5381 | 0.2907 |
| DVPFSVVYFPLFANLNQLGR             | 2297.6             | 2            | 3.0366 | 0.3297 |
| DVPLTIKDPAVGFLETISPGYSIHTYLWR    | 3290.8             | 3            | 3.9122 | 0.2711 |
| DVPRPILLGASAPLK                  | 1547.9             | 2            | 3.2778 | 0.1881 |
| DVPTGGIFQLR                      | 1203.4             | 2            | 3.321  | 0.3175 |

| Peptide Sequence                  | Peptide mass (m/z) | Charge State | Xcorr  | DelCn2 |
|-----------------------------------|--------------------|--------------|--------|--------|
| DVPVAEEVSALFAGELNPVAPK            | 2253.5             | 2            | 4.0122 | 0.3659 |
| DVPVYLFSR                         | 1096.3             | 2            | 2.626  | 0.2015 |
| DVPYPPPLSPAIEAIQK                 | 1836.1             | 2            | 2.7516 | 0.2333 |
| DVQAMK                            | 691.8              | 1            | 1.8455 | 0.1178 |
| DVQELLTQYTK                       | 1338.5             | 2            | 4.2519 | 0.3766 |
| DVQFEHGYR                         | 1151.2             | 2            | 2.6177 | 0.2257 |
| DVQGTDASLDEELDR                   | 1663.7             | 2            | 4.9924 | 0.4829 |
| DVQGTDASLDEELDRVK                 | 1891.0             | 2            | 3.2274 | 0.3423 |
| DVQMLQDAISK                       | 1248.4             | 2            | 3.8813 | 0.2542 |
| DVQNTFYDIVAELGAMEHAQAVDYIK        | 2942.2             | 3            | 4.1342 | 0.3138 |
| DVQNTFYDIVAELGAMEHAQAVDYIKK       | 3070.4             | 3            | 3.7454 | 0.2883 |
| DVRDTVLEPYADPYDYEIER              | 2622.8             | 3            | 3.597  | 0.1969 |
| DVRQQYESVAAK                      | 1394.5             | 2            | 3.0003 | 0.2338 |
| DVSELTGFPEMLGGR                   | 1608.8             | 2            | 4.4763 | 0.3106 |
| DVSKEDHSKR                        | 1201.3             | 2            | 2.8298 | 0.1295 |
| DVSLGTYGSR                        | 1055.1             | 2            | 3.1348 | 0.3399 |
| DVSSALDKLKEFGNTLEDKAR             | 2337.6             | 3            | 5.4919 | 0.403  |
| DVTADFEGQSPK                      | 1294.3             | 2            | 3.673  | 0.301  |
| DVTATVDSLPLITASILSK               | 1945.2             | 2            | 3.9927 | 0.3236 |
| DVTFSPATIENELIK                   | 1677.9             | 2            | 4.0236 | 0.3993 |
| DVTGAEALLER                       | 1174.3             | 2            | 2.9052 | 0.2206 |
| DVTGPDEESFLYFAYGSNLLTER           | 2624.8             | 2            | 4.3339 | 0.4405 |
| DVTLENR                           | 846.9              | 1            | 2.1221 | 0.1445 |
| DVTNFTVGGFAPMSPR                  | 1696.9             | 2            | 3.022  | 0.1221 |
| DVTNNVHYENYR                      | 1524.6             | 2            | 4.0833 | 0.2243 |
| DVTRGQAAVQQLQAEGLSPR              | 2125.3             | 2            | 5.4818 | 0.3183 |
| DVTYEEAK                          | 955.0              | 1            | 2.1102 | 0.2715 |
| DVTYEEAKQFAEENGLLFLEASAK          | 2703.9             | 3            | 4.7072 | 0.3383 |
| DVVFLIDGSQSAGPEFQYVR              | 2228.4             | 3            | 5.8327 | 0.5057 |
| DVVFNYLHATAFQGTPLAQAVEGPSENVRK    | 3260.6             | 3            | 5.4358 | 0.4681 |
| DVICPDASLEDAKK                    | 1603.8             | 2            | 2.7789 | 0.2799 |
| DVVMMENFHHIFATLSR                 | 2048.4             | 2            | 2.8531 | 0.1985 |
| DVYGGAHQTLGLSGNLIASSFGK           | 2293.5             | 3            | 4.6273 | 0.4416 |
| DVYKEHFQDDVFNEK                   | 1914.0             | 2            | 5.0179 | 0.3804 |
| DVYKEHFQDDVFNEKGWNYILEK           | 2918.2             | 3            | 5.1156 | 0.2781 |
| DVYKEHFQDDVFNEKGWNYILEKYDGHLPIEIK | 4084.5             | 3            | 3.8466 | 0.2003 |

| Peptide Sequence                     | Peptide mass (m/z) | Charge State | Xcorr  | DelCn2 |
|--------------------------------------|--------------------|--------------|--------|--------|
| DVYKFDLGDVIDFTGHALALYR               | 2786.1             | 3            | 4.3851 | 0.311  |
| DVYLSPR                              | 850.0              | 1            | 2.3218 | 0.1229 |
| DVYLSPRDDGYSTK                       | 1616.7             | 2            | 3.1154 | 0.2942 |
| DVYVQLYLQHLTAR                       | 1720.0             | 2            | 4.2539 | 0.4249 |
| DVYVVTDQIPVFVTFMFQK                  | 2130.5             | 2            | 5.6039 | 0.5279 |
| DWKLDPVLYR                           | 1305.5             | 2            | 2.5156 | 0.1758 |
| DWSHYFK                              | 983.1              | 2            | 2.467  | 0.1921 |
| DYDAMGSQTK                           | 1116.2             | 2            | 2.6695 | 0.3146 |
| DYDDMSPR                             | 999.0              | 2            | 2.591  | 0.3023 |
| DYDRDKDDKISWEEYK                     | 2106.2             | 3            | 4.0864 | 0.3245 |
| DYDSLAPGFFDR                         | 1531.6             | 2            | 4.2912 | 0.5119 |
| DYEGPAIAPK                           | 1061.2             | 2            | 2.5896 | 0.1503 |
| DYEPSPSPAPGAPPPPPQR                  | 2055.2             | 3            | 4.4231 | 0.4878 |
| DYETATLSDIK                          | 1256.3             | 2            | 3.2135 | 0.3124 |
| DYFEEYGKIDTIEITDR                    | 2221.4             | 2            | 4.8401 | 0.4181 |
| DYFGAHTYELLAQPGQFIHTNWTGHGGTVSSSSYNA | 3916.2             | 3            | 5.5192 | 0.337  |
| DYGHSSSRDDYPSR                       | 1642.6             | 2            | 2.7325 | 0.1027 |
| DYGKESQAKDVIEEYFK                    | 2050.2             | 2            | 4.8798 | 0.3262 |
| DYGN SPLHR                           | 1059.1             | 2            | 2.5048 | 0.2015 |
| DYGVLLLEG SGLALR                     | 1463.7             | 2            | 5.3374 | 0.4728 |
| DYGVYLED SGHTLR                      | 1625.7             | 2            | 4.2087 | 0.453  |
| DYHFKVDNDENEHQLSLR                   | 2260.4             | 3            | 3.4604 | 0.1863 |
| DYILEGEPGK                           | 1121.2             | 2            | 2.6383 | 0.1443 |
| DYILEGEPGKVSNLQYLHSYLYIK             | 2945.3             | 3            | 5.3475 | 0.3723 |
| DYIQKHPELNISEEGITK                   | 2115.3             | 3            | 3.8449 | 0.2981 |
| DYKGFSPSVDWETVDFDSAPSIQELPVQSAITEPR  | 3913.2             | 3            | 5.876  | 0.4042 |
| DYKVDQEIINIMQDR                      | 1881.1             | 2            | 4.4112 | 0.439  |
| DYLDLTASNFFVDDYAR                    | 2140.3             | 2            | 3.6412 | 0.4609 |
| DYLGDFIEHYAQLGPSQPPDLAQAQDEPR        | 3272.5             | 3            | 4.5401 | 0.2332 |
| DYLGDFIEHYAQLGPSQPPDLAQAQDEPRR       | 3428.7             | 3            | 4.84   | 0.3609 |
| DYLHLPPEIVPATLRR                     | 1891.2             | 3            | 3.2584 | 0.243  |
| DYLIDGSR                             | 939.0              | 2            | 2.4336 | 0.1353 |
| DYNKYEEGINIHLAK                      | 1808.0             | 3            | 3.561  | 0.3398 |
| DYNLNDILLQLGIEEAFTSK                 | 2297.5             | 2            | 6.7189 | 0.5701 |
| DYNVTANSK                            | 1012.1             | 2            | 3.2351 | 0.362  |
| DYPDFSPSVD AEAIQK                    | 1782.9             | 2            | 4.5597 | 0.4565 |



| Peptide Sequence          | Peptide mass (m/z) | Charge State | Xcorr  | DelCn2 |
|---------------------------|--------------------|--------------|--------|--------|
| DYPVVSIEDPFDQDDWAAWSK     | 2484.6             | 2            | 3.0168 | 0.1707 |
| DYPVVSIEDPFDQDDWGAWQK     | 2511.6             | 3            | 5.2529 | 0.3637 |
| DYQDNKADVILK              | 1422.6             | 2            | 3.7529 | 0.2989 |
| DYQDNKADVILKYNADK         | 2242.4             | 3            | 4.5639 | 0.3172 |
| DYQGPKLKEHEVTIFVR         | 1932.2             | 3            | 4.4233 | 0.5133 |
| DYSGQGIVK                 | 953.0              | 1            | 1.6433 | 0.1638 |
| DYSGQGIVKLDVQPK           | 1633.8             | 2            | 3.4364 | 0.2352 |
| DYSHYYTTIQDLR             | 1675.8             | 2            | 3.8867 | 0.4151 |
| DYSHYYTTIQDLRDK           | 1919.0             | 3            | 4.0154 | 0.2918 |
| DYSHYYTTIQDLRDKILGATIENSR | 2974.2             | 3            | 4.9244 | 0.5039 |
| DYSKPTPK                  | 1179.3             | 2            | 2.5036 | 0.1966 |
| DYSNFDQEFLEK              | 1649.7             | 2            | 3.608  | 0.2132 |
| DYTGALAVFTR               | 1214.4             | 2            | 3.2191 | 0.3689 |
| DYTGEDVTPQNFLAVLR         | 1939.1             | 2            | 3.9094 | 0.2906 |
| DYTMNELQR                 | 1298.4             | 2            | 3.0418 | 0.2708 |
| DYTSGLMTGELKK             | 1514.7             | 2            | 3.4711 | 0.294  |
| DYTYEELLNR                | 1316.4             | 2            | 2.883  | 0.3569 |
| DYVAPTANLDQK              | 1335.4             | 2            | 3.7628 | 0.3766 |
| DYVAPTANLDQKDKQFVAK       | 2152.4             | 2            | 5.1918 | 0.4392 |
| DYVQKATK                  | 1081.2             | 2            | 2.621  | 0.1992 |
| EAAAALVEEETR              | 1445.6             | 2            | 2.7593 | 0.2106 |
| EAAAATQKRQELEAELAK        | 1958.2             | 2            | 4.1763 | 0.3299 |
| EAAAATQKRQELEAELAKVR      | 2213.5             | 3            | 4.1858 | 0.2939 |
| EAAQQQAER                 | 1102.1             | 2            | 2.7517 | 0.2264 |
| EADKEPPSKK                | 1329.4             | 2            | 2.7439 | 0.2288 |
| EADPLASKLNK               | 1257.4             | 2            | 3.4555 | 0.3369 |
| EAAEMGK                   | 735.8              | 1            | 1.8535 | 0.1435 |
| EAAENSLVAYK               | 1195.3             | 2            | 3.0572 | 0.2659 |
| EAAEQDVEK                 | 1019.0             | 2            | 2.5564 | 0.2312 |
| EAAEQDVEKK                | 1147.2             | 2            | 3.3169 | 0.1993 |
| EAAEQDVEKKK               | 1275.4             | 2            | 3.0417 | 0.1321 |
| EALGAGFSDK                | 1066.1             | 2            | 2.8358 | 0.2858 |
| EALKAQSER                 | 1103.2             | 2            | 2.9945 | 0.1636 |
| EALSTALSEK                | 1120.2             | 2            | 3.3417 | 0.2814 |
| EALSTALSEKR               | 1276.4             | 2            | 2.8955 | 0.3134 |
| EALSTSEEVGADLEQVEVLQK     | 2259.5             | 2            | 6.5644 | 0.4064 |

| Peptide Sequence                          | Peptide mass (m/z) | Charge State | Xcorr  | DelCn2 |
|-------------------------------------------|--------------------|--------------|--------|--------|
| EAANAMKLER                                | 1133.3             | 2            | 2.4043 | 0.1182 |
| EAAPDAGAEPITADSDPAYSSK                    | 2164.2             | 2            | 4.7084 | 0.4259 |
| EAATAVEQEKEILLEMIHSIQNSQDMR               | 3115.5             | 3            | 4.8129 | 0.3558 |
| EAATQAQQTGSGTIDKATGILLYGLASR              | 2879.2             | 3            | 5.5289 | 0.4099 |
| EAAVSHAGSMHR                              | 1253.4             | 2            | 3.0963 | 0.349  |
| EAAWDQALHR                                | 1197.3             | 2            | 2.8516 | 0.2409 |
| EAAYHPEVAPDVR                             | 1454.6             | 2            | 3.0777 | 0.2641 |
| EADDIVNWLK                                | 1203.3             | 2            | 2.7701 | 0.2724 |
| EADDIVNWLKK                               | 1331.5             | 2            | 3.3614 | 0.2626 |
| EADDIVNWLKKRTGPAATTLPGAAAESLVESSEVAVIGFFK | 4405.9             | 3            | 3.6657 | 0.1925 |
| EADESLNFEEQILEAAK                         | 1937.1             | 2            | 5.6774 | 0.4007 |
| EADESLNFEEQILEAAKSIAAATSALVK              | 2950.2             | 3            | 3.4473 | 0.3265 |
| EADGILKPLPK                               | 1181.4             | 2            | 2.6293 | 0.2275 |
| EADGSETPEPFAAEAK                          | 1649.7             | 2            | 4.7326 | 0.4285 |
| EADLAAQEEAAKK                             | 1374.5             | 2            | 3.3983 | 0.2363 |
| EADLPMTAASHSSAFTPVTAASPVS LPR             | 2884.2             | 3            | 4.3439 | 0.2345 |
| EADPALNVETEIEILK                          | 1785.0             | 2            | 3.3225 | 0.2053 |
| EADYVAQATR                                | 1124.2             | 2            | 2.7186 | 0.2517 |
| EAEAAIYHLQLFEELR                          | 1933.2             | 2            | 4.6236 | 0.403  |
| EAEAAIYHLQLFEELRR                         | 2089.3             | 2            | 3.7724 | 0.3468 |
| EAEAAMFHR                                 | 1062.2             | 2            | 2.7852 | 0.2695 |
| EAEAAMFHRK                                | 1190.4             | 2            | 2.8975 | 0.3113 |
| EAEALLQSMGLTPESPIVPPPMSPSSK               | 2795.2             | 3            | 4.3785 | 0.1539 |
| EAEDLQVGQVELGGGP                          | 1598.7             | 2            | 4.9618 | 0.3791 |
| EAEDLQVGQVELGGGPGAGS                      | 1871.0             | 2            | 5.3242 | 0.3783 |
| EAEDLQVGQVELGGGPGAGSLQ                    | 2112.2             | 2            | 5.2721 | 0.3012 |
| EAEDLQVGQVELGGGPGAGSLQP                   | 2209.4             | 2            | 6.2005 | 0.459  |
| EAEDLQVGQVELGGGPGAGSLQPL                  | 2322.5             | 2            | 7.4185 | 0.5039 |
| EAEDLQVGQVELGGGPGAGSLQPLA                 | 2393.6             | 2            | 6.476  | 0.5143 |
| EAEDLQVGQVELGGGPGAGSLQPLAL                | 2506.8             | 2            | 6.364  | 0.5125 |
| EAEDLQVGQVELGGGPGAGSLQPLALEGS             | 2780.0             | 2            | 6.4973 | 0.5441 |
| EAEDLQVGQVELGGGPGAGSLQPLALEGSL            | 2893.2             | 3            | 7.3754 | 0.5305 |
| EAEDLQVGQVELGGGPGAGSLQPLALEGSLQ           | 3021.3             | 3            | 7.8163 | 0.5414 |
| EAEDLQVGQVELGGGPGAGSLQPLALEGSLQK          | 3149.5             | 2            | 8.7087 | 0.5822 |
| EAEDLQVGQVELGGGPGAGSLQPLALEGSLQKR         | 3305.6             | 3            | 7.2682 | 0.5519 |
| EAEFTKSIKFFDHSGLVMDAYEPEISR               | 3320.7             | 3            | 3.422  | 0.269  |

| Peptide Sequence                            | Peptide mass (m/z) | Charge State | Xcorr  | DelCn2 |
|---------------------------------------------|--------------------|--------------|--------|--------|
| EAEGAPQVEAGK                                | 1186.3             | 2            | 2.5902 | 0.1567 |
| EAEGSSAEYKK                                 | 1199.2             | 2            | 2.7769 | 0.3221 |
| EAEGSSAEYKKEIEELKELLPEIR                    | 2792.1             | 3            | 3.2792 | 0.1884 |
| EAEGTEEGGEEEDDEEMDPQTIDSLIELSTK             | 3427.5             | 2            | 6.1347 | 0.3947 |
| EAELYHTLESSYQK                              | 1836.0             | 2            | 3.8265 | 0.2914 |
| EAEKLESEHPDQAQAILS                          | 2152.3             | 3            | 6.1716 | 0.4172 |
| EAELDVNEELDKK                               | 1532.6             | 2            | 3.8809 | 0.2681 |
| EAEKLESEHPDQAQAILS                          | 2152.3             | 3            | 6.1716 | 0.4172 |
| EAELKEAEKELHEK                              | 1683.8             | 2            | 3.5378 | 0.2256 |
| EAELKEAEKELHEKFDLLKR                        | 2456.8             | 3            | 3.417  | 0.1811 |
| EAENPEGEEKEAATLEVERPLPMEVEK                 | 3055.3             | 3            | 6.1693 | 0.4487 |
| EAESCDCLQGFQLTHSLGGGTGSGMGTLLISK            | 3199.6             | 3            | 4.7356 | 0.3547 |
| EAESCDCLQGFQLTHSLGGGTGSGMGTLLLSK            | 3199.6             | 3            | 5.018  | 0.4152 |
| EAESLIKK                                    | 989.1              | 2            | 2.8533 | 0.1529 |
| EAESSPFVER                                  | 1151.2             | 2            | 3.2055 | 0.2372 |
| EAETEPHEGKR                                 | 1283.3             | 2            | 2.5062 | 0.2958 |
| EAETLREQLSSANHSLQLASQIQK                    | 2682.9             | 3            | 4.8101 | 0.2932 |
| EAEVLLLQQR                                  | 1199.4             | 2            | 3.7218 | 0.2051 |
| EAEYFELPELVR                                | 1495.7             | 2            | 3.8067 | 0.4261 |
| EAFDEVMAHR                                  | 1320.4             | 2            | 2.6311 | 0.2983 |
| EAFLNTEKGDSDLDSVEALIK                       | 2295.5             | 2            | 5.5545 | 0.4302 |
| EAFQLFDR                                    | 1026.1             | 2            | 2.7709 | 0.156  |
| EAFRVFDKDGNGYISAAELR                        | 2259.5             | 2            | 4.2081 | 0.294  |
| EAFSLFDKDGDTITTK                            | 1846.0             | 2            | 4.0037 | 0.3928 |
| EAFTNKPVFTVVTR                              | 1724.0             | 2            | 3.5706 | 0.2589 |
| EAGAGGLAIAVEGPSK                            | 1427.6             | 2            | 4.3051 | 0.27   |
| EAGAGGLAIAVEGPSKAEISFEDR                    | 2375.6             | 3            | 3.3803 | 0.2744 |
| EAGAGGLAIAVEGPSKAEISFEDRK                   | 2503.8             | 3            | 4.87   | 0.4154 |
| EAGAGGLSIAVEGPSK                            | 1443.6             | 2            | 2.8746 | 0.1533 |
| EAGAGGLSIAVEGPSKAEITFDDHK                   | 2500.7             | 3            | 3.2122 | 0.1777 |
| EAGEGGEAEAPAAEGGK                           | 1530.5             | 2            | 5.324  | 0.3098 |
| EAGELKPEEEITVGPVQK                          | 1954.2             | 2            | 4.3746 | 0.3116 |
| EAGEQGDIENR                                 | 1201.2             | 2            | 3.2894 | 0.2191 |
| EAGFKRPVVLFGPIADIAMEK                       | 2289.7             | 3            | 5.064  | 0.4061 |
| EAGFLRPVTIFGPIADVAR                         | 2030.4             | 3            | 5.0374 | 0.2798 |
| EAGFPPGVVNIYPGYGPTAGAAISSHMDIDK             | 3069.4             | 3            | 3.5898 | 0.1976 |
| EAGFPPGVVNIYPGYGPTAGAAISSHMDIDKVAFTGSTVEVGK | 4146.6             | 3            | 4.5394 | 0.362  |

| Peptide Sequence                                | Peptide mass (m/z) | Charge State | Xcorr  | DelCn2 |
|-------------------------------------------------|--------------------|--------------|--------|--------|
| EAGFPPGVVNIWPGYPTAGAAISSHMDIDKVAFTGSTEVGKLIK    | 4501.1             | 3            | 4.2657 | 0.3035 |
| EAGGAFGK                                        | 736.8              | 1            | 1.6588 | 0.2262 |
| EAGGGGVGGPGAK                                   | 1014.1             | 2            | 3.5201 | 0.2126 |
| EAGHGTQKEEIPPEELAEDVEEIDHAER                    | 3191.3             | 3            | 5.2886 | 0.4189 |
| EAGHGTTKEEITK                                   | 1401.5             | 2            | 2.4406 | 0.114  |
| EAGIPEFYDYDVALIK                                | 1844.1             | 2            | 3.9119 | 0.4357 |
| EAGISDYLTIEELVK                                 | 1680.9             | 2            | 3.0207 | 0.2067 |
| EAGITEK                                         | 747.8              | 1            | 2.151  | 0.1239 |
| EAGITEKVVFEQTK                                  | 1579.8             | 2            | 3.6361 | 0.3558 |
| EAGKEPAEGGGGDGSHR                               | 1611.6             | 2            | 3.9931 | 0.3194 |
| EAGLVAQHPPAR                                    | 1246.4             | 2            | 2.8064 | 0.1677 |
| EAGTKEEPVTADVINPMALR                            | 2142.4             | 2            | 3.2092 | 0.193  |
| EAGVEKFIHVSHLNANIK                              | 2007.3             | 2            | 3.4663 | 0.2683 |
| EAGVEMGDEDDLSTPNEK                              | 1937.0             | 2            | 5.2529 | 0.3787 |
| EAHEPLAVADAK                                    | 1251.4             | 2            | 2.7898 | 0.2795 |
| EAHFVR                                          | 758.8              | 1            | 1.6096 | 0.1083 |
| EAIARELEREKEKLQQAQK                             | 2143.4             | 3            | 4.5227 | 0.2022 |
| EAIKAGYTEK                                      | 1225.3             | 2            | 2.5132 | 0.3069 |
| EAIKSYKADDPSSYMEVVQAANTSGNWEELVK                | 3661.9             | 3            | 5.9009 | 0.4235 |
| EAIKTYIDKK                                      | 1267.4             | 1            | 2.7462 | 0.1929 |
| EAIENATTNAEVLK                                  | 1531.7             | 2            | 3.5401 | 0.2456 |
| EAIHSQLEK                                       | 1168.3             | 2            | 2.4084 | 0.1428 |
| EAILAIHKEAQR                                    | 1379.6             | 2            | 3.2856 | 0.1766 |
| EAILEYILHQAQK                                   | 1357.6             | 2            | 2.6772 | 0.2105 |
| EAILNDEIYCPPETAVLLASYAVQAQK                     | 2823.2             | 3            | 3.4581 | 0.2197 |
| EAINVEQAFQTIAR                                  | 1590.8             | 2            | 4.5645 | 0.4515 |
| EAIQHPADEKLQEK                                  | 1636.8             | 2            | 3.9539 | 0.2821 |
| EAKPDELMDSKLR                                   | 1532.7             | 2            | 2.6301 | 0.1682 |
| EAKQQEELKIEK                                    | 1360.5             | 2            | 2.705  | 0.1175 |
| EALAQTVLAEVPTQLVSYFR                            | 2236.6             | 3            | 6.1296 | 0.4979 |
| EALATLKPQAGLIVPQAVPSSQPSVVGAGEPMDLGELVGMTPEIIQK | 4769.5             | 3            | 4.6196 | 0.4406 |
| EALDHMVEYVAQNTPTVTLVGPFPAGITEK                  | 3314.8             | 3            | 4.0119 | 0.3373 |
| EALDVLDAVLK                                     | 1186.4             | 2            | 2.6291 | 0.2172 |
| EALDKTEKQLEAIDQLHLEYAK                          | 2600.9             | 3            | 3.6846 | 0.2559 |
| EALDKTEKQLEAIDQLHLEYAKR                         | 2757.1             | 3            | 4.5168 | 0.285  |
| EALNANTNTEVLK                                   | 1546.7             | 2            | 4.4234 | 0.2819 |

| Peptide Sequence                       | Peptide mass (m/z) | Charge State | Xcorr  | DelCn2 |
|----------------------------------------|--------------------|--------------|--------|--------|
| EALGGQALYPHVLVK                        | 1595.9             | 2            | 2.8483 | 0.2252 |
| EALGHWLGLLNADGWIGREQILGDEAR            | 2991.3             | 3            | 3.7599 | 0.2655 |
| EALKDEYDDLSDLTAAQQETLSDWESQFTFK        | 3625.8             | 3            | 6.9966 | 0.5383 |
| EALKEAVILPIKFPHLFTGK                   | 2252.7             | 3            | 4.6001 | 0.3093 |
| EALKQREEMLEK                           | 1504.7             | 2            | 3.5806 | 0.1317 |
| EALLSSAVDHGSDEVK                       | 1657.8             | 2            | 4.4495 | 0.3969 |
| EALLSSAVDHGSDEVKFR                     | 1961.1             | 3            | 3.5491 | 0.3828 |
| EALLSSAVDHGSDEVKFRQDLMNIAGTTLSSK       | 3421.8             | 3            | 6.4411 | 0.4832 |
| EALLVANGTPR                            | 1141.3             | 2            | 3.5204 | 0.3651 |
| EALNVFGNDYDTEDEGTGVRDYIHVVDLAK         | 3227.4             | 3            | 4.8709 | 0.4506 |
| EALNVINTHTK                            | 1240.4             | 2            | 2.7865 | 0.2817 |
| EALQEKEEQKTMK                          | 1592.8             | 2            | 4.3987 | 0.3514 |
| EALRGEVGHGLALEELQAQVQATSTQLALEELR      | 3675.1             | 3            | 5.5534 | 0.4103 |
| EALTYDGALLGDR                          | 1394.5             | 2            | 2.9163 | 0.1747 |
| EAMDPIAELLSQLSGVR                      | 1830.1             | 2            | 4.3006 | 0.3366 |
| EAMEDGEIDGNK                           | 1308.4             | 2            | 3.4474 | 0.312  |
| EAMEDGEIDGNKVTLDWAKPK                  | 2347.6             | 3            | 4.8221 | 0.3047 |
| EAMEHPYFYTVVKDQAR                      | 2085.3             | 3            | 4.2413 | 0.353  |
| EAMQQADDWLGIPQVITPEEIVDPNVDEHSMYLSQFPK | 4573.1             | 3            | 5.9229 | 0.3823 |
| EAMQQADDWLGVPQVITPEEIIHPDVDEHSMYLSQFPK | 4596.1             | 3            | 4.66   | 0.366  |
| EAMRIGAEVYHNLK                         | 1631.9             | 3            | 3.5847 | 0.2944 |
| EANAHLAAVHR                            | 1189.3             | 2            | 3.1179 | 0.3064 |
| EANELQQWINEK                           | 1502.6             | 2            | 3.6136 | 0.1881 |
| EANELQQWINEKEAALTSEEVGADLEQVEVLQK      | 3743.0             | 3            | 5.8167 | 0.3197 |
| EANHNVSAFYGR                           | 1315.4             | 2            | 2.4677 | 0.2822 |
| EANNFLWPFK                             | 1266.4             | 2            | 2.7297 | 0.1427 |
| EANNYEEDPNKPTSWTENQAGKIPEK             | 2991.1             | 3            | 3.9427 | 0.2455 |
| EANSKADPSLNPEQLK                       | 1741.9             | 2            | 4.2302 | 0.3297 |
| EANSKADPSLNPEQLKK                      | 1870.1             | 2            | 4.5351 | 0.3376 |
| EANVDAATKKGNTALHIASLAGQAEVVK           | 2808.1             | 3            | 5.769  | 0.4731 |
| EANYIGSDKYFHAR                         | 1671.8             | 2            | 3.6862 | 0.4012 |
| EAPAGPLEEDDLEPLTLAPAPAPRPPQDLIGLR      | 3460.9             | 3            | 4.3584 | 0.4203 |
| EAPAKLESQAGQQVSR                       | 1699.8             | 2            | 3.6632 | 0.3585 |
| EAPAPPKAEAK                            | 1109.3             | 2            | 2.4627 | 0.1029 |
| EAPKVVEEQESR                           | 1401.5             | 2            | 2.633  | 0.2096 |
| EAPPMEKPEVVK                           | 1354.6             | 2            | 2.9549 | 0.2708 |

| Peptide Sequence                               | Peptide mass (m/z) | Charge State | Xcorr  | DelCn2 |
|------------------------------------------------|--------------------|--------------|--------|--------|
| EAPPMKPEVVKTHLR                                | 1862.2             | 3            | 3.6452 | 0.153  |
| EAPPRELTEEEKQQILHSEEFLIFFDR                    | 3332.7             | 3            | 5.4898 | 0.3449 |
| EAPVDVLTQIGR                                   | 1298.5             | 2            | 3.6029 | 0.3815 |
| EAQAALAEAQEDLESER                              | 1860.9             | 2            | 5.1971 | 0.5353 |
| EAQ GKIDVLQAEVAALK                             | 1784.0             | 2            | 2.6014 | 0.1691 |
| EAQKELEALIQNLDNVVEDSMLVDPK                     | 2942.3             | 3            | 5.4872 | 0.3122 |
| EAQLEEQFYLQALKLPNQTHPDVPVGDESQAR               | 3653.0             | 3            | 5.0681 | 0.258  |
| EAQNQPIDKAR                                    | 1270.4             | 2            | 3.1242 | 0.2628 |
| EAQQALGSAAADATEAK                              | 1632.7             | 2            | 4.1291 | 0.4237 |
| EAQSDLNKTR                                     | 1162.2             | 2            | 2.9261 | 0.1128 |
| EAQTSFLHLGYPNQLFR                              | 2135.4             | 3            | 4.0943 | 0.4495 |
| EASDIILTDDNFTSIVK                              | 1882.1             | 2            | 3.8244 | 0.2443 |
| EASDPQPEEADGGLK                                | 1543.6             | 2            | 3.8067 | 0.2638 |
| EASEEAFSGSAQPRPPSVVHESR                        | 2455.6             | 3            | 4.0916 | 0.2959 |
| EASHVLEVK                                      | 1012.1             | 2            | 2.6345 | 0.189  |
| EASIDILHSIVK                                   | 1325.5             | 2            | 2.7298 | 0.31   |
| EASIYTGITLSEYFR                                | 1750.9             | 2            | 4.4984 | 0.4488 |
| EASRPPEEPSAPSPTLPAQFK                          | 2237.5             | 3            | 3.695  | 0.166  |
| EASSVSEELHKEVQEAFLLHK                          | 2512.8             | 3            | 4.4023 | 0.3427 |
| EATADDLIKVVEELTR                               | 1803.0             | 2            | 5.025  | 0.4142 |
| EATAHFQITLDEIQAQLEQHDHNAK                      | 3002.2             | 3            | 4.3337 | 0.3166 |
| EATDAIGHLDR                                    | 1198.3             | 2            | 3.2534 | 0.39   |
| EATNPPVIQEEKPK                                 | 1580.8             | 2            | 3.7141 | 0.3431 |
| EATNPPVIQEEKPKK                                | 1708.9             | 2            | 3.2852 | 0.3842 |
| EATNPPVIQEEKPKKK                               | 1837.1             | 2            | 3.2973 | 0.3687 |
| EATQEAFMKR                                     | 1211.4             | 2            | 2.4203 | 0.1125 |
| EATQILSVPKVDDEILGFISEATPLGGIQAASTESCNQQLDLALCR | 4847.4             | 3            | 3.6664 | 0.2392 |
| EATSDPSRTPEEEPLNLEGLVAHR                       | 2648.8             | 3            | 4.938  | 0.4117 |
| EATSVPHIYAIGDVVEGRPELTPIAIMAGR                 | 3164.6             | 3            | 3.7502 | 0.2506 |
| EATTDFTVDSRPLTQVGGDHIK                         | 2388.6             | 2            | 3.7111 | 0.3876 |
| EATTEFSVDAR                                    | 1226.3             | 2            | 2.6619 | 0.1231 |
| EATTLANGVLASLNLPAAIEDVSGDTPVQSILTK             | 3410.8             | 3            | 5.2906 | 0.4891 |
| EATVKPFAIDIFPVTNK                              | 1891.2             | 2            | 3.5073 | 0.2725 |
| EATVKPFAIDIFPVTNKDFR                           | 2309.6             | 3            | 4.2444 | 0.464  |
| EATWVVDVK                                      | 1047.2             | 1            | 1.8458 | 0.1565 |
| EAVAHENNR                                      | 1040.1             | 2            | 2.4417 | 0.3015 |

| Peptide Sequence              | Peptide mass (m/z) | Charge State | Xcorr  | DelCn2 |
|-------------------------------|--------------------|--------------|--------|--------|
| EAVANKGPVSVGVDAR              | 1569.7             | 2            | 4.0952 | 0.399  |
| EAVAPVQEESDLEK                | 1544.6             | 2            | 3.2048 | 0.3852 |
| EAVEEPSSK                     | 976.0              | 1            | 2.0919 | 0.1948 |
| EAVEKEFEPLLNWMK               | 1864.2             | 2            | 4.8983 | 0.3816 |
| EAVEKEFEPLLNWMKDK             | 2107.4             | 3            | 4.5924 | 0.3976 |
| EAVELPLTHFELYK                | 1689.9             | 2            | 3.6237 | 0.337  |
| EAVFFQSHSAR                   | 1279.4             | 2            | 2.5362 | 0.1547 |
| EAVIAQISSHVK                  | 1282.5             | 2            | 3.2437 | 0.2528 |
| EAVILPIKFPHLFTGK              | 1811.2             | 2            | 3.4485 | 0.38   |
| EAVKAASDELSK                  | 1248.4             | 2            | 2.5089 | 0.1699 |
| EAVKEESIKR                    | 1189.3             | 2            | 2.7345 | 0.2098 |
| EAVKEIQTSK                    | 1204.4             | 2            | 2.8687 | 0.1701 |
| EAVKHIGYDDSSKGFQYK            | 2060.2             | 2            | 4.4976 | 0.4661 |
| EAVLAALALR                    | 1027.2             | 2            | 2.8809 | 0.2283 |
| EAVLDVIPTDIHQK                | 1606.8             | 2            | 4.7391 | 0.2561 |
| EAVLIDPVLETAPK                | 1523.8             | 2            | 4.5517 | 0.3624 |
| EAVQLMAEAEKR                  | 1375.6             | 2            | 2.7972 | 0.2692 |
| EAVSSAFFSLLQLSTQFK            | 2105.4             | 2            | 3.2599 | 0.4631 |
| EAVTEILGIEPDREK               | 1699.9             | 2            | 4.0473 | 0.2594 |
| EAVTFLRK                      | 964.1              | 2            | 2.7216 | 0.2381 |
| EAWKIWADIPAPK                 | 1525.8             | 2            | 3.795  | 0.2917 |
| EAYGAVTQTVK                   | 1195.3             | 2            | 3.1311 | 0.2324 |
| EAYMGNVLQGGEGQAPTR            | 1879.0             | 2            | 4.9187 | 0.498  |
| EAYPDHTQFEK                   | 1365.4             | 2            | 2.6397 | 0.1959 |
| EAYPEEAYIADLDAK               | 1698.8             | 2            | 4.5533 | 0.4793 |
| EAYPGDVFYLSR                  | 1554.7             | 2            | 3.5593 | 0.412  |
| EAYVNAVQAR                    | 1136.2             | 2            | 2.5868 | 0.2212 |
| EDAQLEVELQEGK                 | 1375.4             | 2            | 2.7821 | 0.1445 |
| EDAQVAEILEIADTPSGDK           | 2073.2             | 2            | 3.787  | 0.2915 |
| EDAQVAEILEIADTPSGDKTSLETR     | 2760.9             | 3            | 4.6387 | 0.3669 |
| EDAVSKEVTR                    | 1134.2             | 2            | 2.5372 | 0.1868 |
| EDDFLNNAMSSLYSGWSSFTTGASR     | 2744.9             | 2            | 3.8254 | 0.4399 |
| EDDLNSFNATDLKDLSSHQLNEFLAQLQR | 3464.7             | 3            | 6.7579 | 0.521  |
| EDDSIRPFKVETSDEEIHDLHQK       | 2796.9             | 3            | 5.7552 | 0.4936 |
| EDEEEEEGENYQKGER              | 1970.9             | 2            | 3.2794 | 0.3969 |
| EDGNEEDKENQGDETQGQPPQR        | 2629.6             | 3            | 5.1553 | 0.4079 |

| Peptide Sequence              | Peptide mass (m/z) | Charge State | Xcorr  | DelCn2 |
|-------------------------------|--------------------|--------------|--------|--------|
| EDGNEEDKENQGDETQGGQPPQRR      | 2785.8             | 3            | 4.2595 | 0.4067 |
| EDGTFYEFGEDIPEAPER            | 2102.2             | 2            | 3.9924 | 0.3866 |
| EDHGRGYFEYIEENKYSR            | 2293.4             | 3            | 4.7043 | 0.3291 |
| EDHSLEHR                      | 1023.0             | 2            | 2.4421 | 0.206  |
| EDIDTAMK                      | 923.0              | 1            | 2.0039 | 0.2894 |
| EDILENQFMDSR                  | 1497.6             | 2            | 2.828  | 0.1678 |
| EDITHSAQHALR                  | 1378.5             | 2            | 2.9549 | 0.1837 |
| EDITQSAQHALR                  | 1369.5             | 2            | 3.3604 | 0.3637 |
| EDLHILFSNHGEIK                | 1652.8             | 2            | 4.121  | 0.3055 |
| EDLRLPEGDLGKEIEQK             | 1970.2             | 2            | 4.7353 | 0.2345 |
| EDLTEIRDMLLANKVPAAAR          | 2227.6             | 3            | 4.038  | 0.2751 |
| EDLVFIFWAPESAPLK              | 1863.1             | 2            | 2.6255 | 0.1911 |
| EDMAALEK                      | 907.0              | 1            | 2.5211 | 0.2007 |
| EDPNLVPSISNK                  | 1313.4             | 2            | 2.7831 | 0.2844 |
| EDQSILCTGESGAGK               | 1495.6             | 2            | 4.0168 | 0.3927 |
| EDQTEYLEER                    | 1312.3             | 2            | 3.357  | 0.3411 |
| EDSARPGAHAK                   | 1139.2             | 2            | 2.4166 | 0.203  |
| EDSERPGAHLTVK                 | 1439.6             | 2            | 3.4344 | 0.12   |
| EDSKEAEKSGEATDGARPQALPEPMQESK | 3117.3             | 3            | 4.5593 | 0.3632 |
| EDSQRPGAHLTVK                 | 1438.6             | 2            | 2.9531 | 0.1304 |
| EDSRADVKRNNVTR                | 1660.8             | 2            | 2.7311 | 0.1441 |
| EDSVKPGAHLTVK                 | 1381.6             | 2            | 3.4465 | 0.2555 |
| EDSVKPGAHLTVKK                | 1509.7             | 2            | 3.2217 | 0.1462 |
| EDTEEHHLRDYFEEYGKIDTIEITDR    | 3368.6             | 3            | 4.7694 | 0.2855 |
| EDTESLEIFQNEVAR               | 1780.9             | 2            | 4.157  | 0.3388 |
| EDTLAFSEWGSPHAAVPR            | 1971.1             | 2            | 3.1755 | 0.1871 |
| EDTNNLFSVQFR                  | 1470.6             | 2            | 3.5073 | 0.3332 |
| EDYKFHHTFSTEIAK               | 1854.0             | 2            | 3.6278 | 0.2122 |
| EEAAEHIPLLFFAFPSAK            | 2018.3             | 2            | 2.8011 | 0.1705 |
| EEAAVDAQQQK                   | 1217.3             | 2            | 3.1497 | 0.2038 |
| EEADEYIDIGALNGIFVLGR          | 2195.4             | 2            | 5.7482 | 0.4635 |
| EEAENTLQSFR                   | 1324.4             | 2            | 3.0881 | 0.3843 |
| EEAENTLQSFRQVDNASLAR          | 2394.5             | 3            | 3.974  | 0.3705 |
| EEAQAEIEQYR                   | 1366.4             | 2            | 3.9911 | 0.3962 |
| EEASDYLELDTIK                 | 1526.6             | 2            | 3.8906 | 0.2489 |
| EEASGSSVTAEAAK                | 1523.6             | 2            | 3.5272 | 0.2731 |



| Peptide Sequence                       | Peptide mass (m/z) | Charge State | Xcorr  | DelCn2 |
|----------------------------------------|--------------------|--------------|--------|--------|
| EECDKYALQSQR                           | 1598.7             | 2            | 2.4044 | 0.2667 |
| EECLLGR                                | 819.9              | 1            | 1.787  | 0.1042 |
| EEDDVVSEDLVQQDVQDLYEAGELK              | 2867.0             | 3            | 4.9026 | 0.3412 |
| EEDEVYPPGPYHPFPNYIRPR                  | 2573.8             | 3            | 3.2266 | 0.3264 |
| EEDSANLKPSELKK                         | 1588.7             | 2            | 3.7055 | 0.1622 |
| EEEAIQLDGLNASQIR                       | 1786.9             | 2            | 4.8732 | 0.4393 |
| EEEEEEEEAEAGEEAVPEEEGPTVVLNPHPSLGYK    | 3983.1             | 3            | 6.6559 | 0.5086 |
| EEEEEEEEAEAGEEAVPEEEGPTVVLNPHPSLGYKEI  | 4225.3             | 3            | 6.4536 | 0.4672 |
| EEEEEEEEAEAGEEAVPEEEGPTVVLNPHPSLGYKEIR | 4381.5             | 3            | 5.6377 | 0.5057 |
| EEEEKAEFER                             | 1424.5             | 2            | 2.9692 | 0.2831 |
| EEEEVLQGDYFYSLLSK                      | 2002.1             | 2            | 5.096  | 0.3758 |
| EEEGSANRRPEDQELESLSAIEAELEK            | 3060.2             | 3            | 3.4993 | 0.1352 |
| EEEGSANRRPEDQELESLSAIEAELEKVAHQQLALR   | 4077.4             | 3            | 4.0749 | 0.3623 |
| EEFASTCPDDEEIELAYEQVAK                 | 2517.7             | 2            | 4.5238 | 0.4703 |
| EEFTAFLHPEEFHMK                        | 2022.2             | 2            | 3.1821 | 0.2811 |
| EEGGENLDQAR                            | 1218.2             | 2            | 2.8213 | 0.2918 |
| EEGPYEVEVTYDGVVPGSPFPLEAVAPTQPSK       | 3487.9             | 3            | 5.3211 | 0.4276 |
| EEIFGPVQQIMK                           | 1419.7             | 2            | 3.4682 | 0.2833 |
| EEIKDDNPHLK                            | 1338.4             | 2            | 3.5922 | 0.2464 |
| EEILAQAKENEK                           | 1402.5             | 2            | 4.0588 | 0.2006 |
| EEITMEHLEPHLQAEIVETIDNGFGHSR           | 3233.5             | 3            | 4.228  | 0.2967 |
| EEIVQFFSGLIIVPNGITLPVDFQGR             | 2906.3             | 3            | 3.3569 | 0.2404 |
| EEKEESDDEAAVEEEEEKKPK                  | 2607.6             | 3            | 5.4725 | 0.3289 |
| EEKKEEEEKKEVMLQNGETPKDLNDEKQKK         | 3633.0             | 3            | 4.4047 | 0.1424 |
| EEKPGSKKVEEDLKADK                      | 1931.1             | 2            | 2.9055 | 0.1493 |
| EELAQQYEAILR                           | 1463.6             | 2            | 3.7108 | 0.3403 |
| EELDKYWSQQIEESTTVVTTQSAEVGAAETTLTELRR  | 4201.5             | 3            | 3.7704 | 0.2803 |
| EELDSLMTDETIANVPILILGNK                | 2529.9             | 2            | 2.513  | 0.1249 |
| EELEEEELDEAVER                         | 1590.6             | 2            | 4.8695 | 0.4408 |
| EELEEEQRTEE                            | 1421.4             | 2            | 3.8471 | 0.1941 |
| EELEEVKDI                              | 1217.3             | 2            | 2.8888 | 0.1278 |
| EELEQASQAHGAR                          | 1426.5             | 2            | 4.3975 | 0.3179 |
| EELSNVLAAMR                            | 1233.4             | 2            | 2.987  | 0.2643 |
| EELTAFLHPEEFPHMR                       | 1984.2             | 2            | 3.8563 | 0.3966 |
| EELVKNLGTIAK                           | 1315.5             | 2            | 3.6691 | 0.2718 |
| EENKGGEDKLLK                           | 1247.3             | 2            | 3.1175 | 0.1601 |

| Peptide Sequence                | Peptide mass (m/z) | Charge State | Xcorr  | DelCn2 |
|---------------------------------|--------------------|--------------|--------|--------|
| EENLSMHQMLDQTLLELNNM            | 2404.7             | 2            | 4.6734 | 0.3159 |
| EENVKADV FHAYLSLLK              | 1977.2             | 3            | 4.8638 | 0.3474 |
| EESGKPGAHVTVK                   | 1339.5             | 2            | 3.4673 | 0.359  |
| EESGKPGAHVTVKK                  | 1467.7             | 2            | 3.3539 | 0.1727 |
| EESLVEELSPASEK                  | 1547.6             | 2            | 3.3879 | 0.3247 |
| EESREPAPASPAPAGVEIR             | 1964.1             | 3            | 3.2518 | 0.2499 |
| EESTSSGNVSNR                    | 1267.2             | 2            | 2.9247 | 0.4436 |
| EETQPPVALKK                     | 1240.4             | 2            | 2.9566 | 0.1382 |
| EEVEVLKEQIK                     | 1344.5             | 2            | 3.1708 | 0.1154 |
| EEVKEAYMGNVLQGGEGQAPTR          | 2364.6             | 3            | 4.0489 | 0.1667 |
| EEYEGPNKKPR                     | 1347.5             | 2            | 3.0776 | 0.3848 |
| EEYPDRIMNTFSVVPSPK              | 2110.4             | 3            | 3.2728 | 0.2709 |
| EFADSLGIPFLETSAK                | 1725.9             | 2            | 4.7827 | 0.4297 |
| EFATLIIDILSEAK                  | 1563.8             | 2            | 2.923  | 0.2531 |
| EFDDLSPQQR                      | 1364.4             | 2            | 3.3273 | 0.2348 |
| EFDELNPSAQR                     | 1306.4             | 2            | 2.7897 | 0.2464 |
| EFDLTKEEDLAALRHEIELR            | 2428.7             | 3            | 3.4691 | 0.2554 |
| EFDYVINDLTAVPISTSPPEEDSTWEFLR   | 3275.5             | 2            | 2.7531 | 0.1834 |
| EFEETMDALQADIDQLEAEKAEK         | 2768.0             | 2            | 2.582  | 0.207  |
| EFELEESYNGR                     | 1373.4             | 2            | 2.505  | 0.1837 |
| EFEPKPHVAVK                     | 1507.8             | 2            | 3.2436 | 0.2621 |
| EFESVLVDAF SHVAR                | 1706.9             | 2            | 3.9116 | 0.4215 |
| EFFNGKEPSR                      | 1211.3             | 2            | 3.0871 | 0.302  |
| EFGEEALNSLQK                    | 1365.5             | 2            | 3.1741 | 0.2724 |
| EFGGGHIKDEVFGTVKEDVSLHGYKK      | 2878.2             | 3            | 4.6483 | 0.4056 |
| EFHHGPDPTDTAPGEQAQDVASSPPESSFQK | 3295.4             | 3            | 5.2087 | 0.2782 |
| EFHLESNDPSSK                    | 1447.5             | 2            | 3.7997 | 0.33   |
| EFHSHEFHSHEDMLVVDPK             | 2321.5             | 2            | 4.1174 | 0.4174 |
| EFIAWLVK                        | 1006.2             | 1            | 2.5713 | 0.2201 |
| EFIEKYDKSLHQAIEGDTSGDFLK        | 2772.0             | 3            | 5.3939 | 0.3508 |
| EFIGSFLEMFGPEGALK               | 1873.2             | 2            | 2.8533 | 0.2503 |
| EFLGKSEPEHQH                    | 1438.5             | 2            | 2.9993 | 0.3214 |
| EFLGTYNKLTETCFDLCVKDFTTR        | 2846.2             | 3            | 4.0429 | 0.345  |
| EFLHAQEEVKR                     | 1386.5             | 2            | 3.1407 | 0.4358 |
| EFNAETFTFHADICTLSEK             | 2204.4             | 2            | 4.0777 | 0.498  |
| EFNAEVHRK                       | 1130.2             | 2            | 3.0089 | 0.2593 |

| Peptide Sequence                         | Peptide mass (m/z) | Charge State | Xcorr  | DelCn2 |
|------------------------------------------|--------------------|--------------|--------|--------|
| EFNEEGALSVLQQFK                          | 1739.9             | 2            | 3.5311 | 0.1813 |
| EFNGQHFILEEAITGDFALVK                    | 2379.7             | 2            | 2.8918 | 0.2911 |
| EFNKYDTDGSK                              | 1304.3             | 2            | 2.9718 | 0.1937 |
| EFPGFLENQKDPLAVDK                        | 1948.2             | 2            | 4.2228 | 0.2992 |
| EFPVYLWQPFFR                             | 1629.9             | 2            | 3.3004 | 0.2639 |
| EFQASPLLLPVPTQVPQPVGR                    | 2274.6             | 3            | 4.6824 | 0.4849 |
| EFQDAGEQVVSSPADVAEK                      | 2007.1             | 2            | 5.1968 | 0.5011 |
| EFQLHQHLFDPEHDYPGLGK                     | 2408.6             | 3            | 5.5081 | 0.4289 |
| EFQLHQHLFDPEHDYPGLGKWNK                  | 2837.1             | 3            | 3.7013 | 0.2241 |
| EFQLHQHLFDPEHDYPGLGKWNKK                 | 2965.3             | 3            | 5.7995 | 0.3797 |
| EFRFEPSSQMIEVQEGQNLK                     | 2397.6             | 3            | 4.4752 | 0.2035 |
| EFRGQENGLDGTK                            | 1451.5             | 2            | 3.9985 | 0.29   |
| EFSHIAFLTIK                              | 1306.5             | 2            | 3.3357 | 0.3156 |
| EFSHLGKEDFTSLSLVLYSR                     | 2329.6             | 3            | 4.3693 | 0.368  |
| EFSIDVGYER                               | 1215.3             | 2            | 2.7084 | 0.3763 |
| EFSITDLVPYSITLR                          | 1755.0             | 2            | 4.1045 | 0.4935 |
| EFSITDVVPYPISLR                          | 1737.0             | 2            | 4.5138 | 0.491  |
| EFSPPFGTITSAK                            | 1285.4             | 2            | 2.8109 | 0.3316 |
| EFTEAVEAK                                | 1024.1             | 1            | 1.7502 | 0.1244 |
| EFTKLEEVLTNK                             | 1451.6             | 2            | 3.6711 | 0.3359 |
| EFTKLEEVLTNKK                            | 1579.8             | 2            | 4.444  | 0.3233 |
| EFTLEFSR                                 | 1029.1             | 2            | 2.5615 | 0.2936 |
| EFVEREVIDFAR                             | 1510.7             | 2            | 2.4221 | 0.2218 |
| EFVGQLVAPLPLGTGALR                       | 1839.2             | 2            | 2.7238 | 0.141  |
| EFVISDRKELEEDFIK                         | 1998.2             | 3            | 3.6196 | 0.3028 |
| EFVISDRKELEEDFIKSELKK                    | 2583.9             | 3            | 5.8189 | 0.329  |
| EGAAHAFAQYNLDQFTPVKIEGYEDQVLITEHGD LGNGK | 4277.6             | 3            | 5.3048 | 0.4109 |
| EGAAHAFAQYNMDQFTPVKIEGYEDQVLITEHGD LGNSR | 4353.7             | 3            | 5.8291 | 0.4123 |
| EGAIHREELVYELNPLDHR                      | 2291.5             | 3            | 5.0279 | 0.2315 |
| EGAPGAEGSPGR                             | 1085.1             | 2            | 3.3904 | 0.3963 |
| EGASEEEIRLSK                             | 1348.4             | 2            | 3.7815 | 0.1445 |
| EGASLPKPKP                               | 1024.2             | 2            | 2.4478 | 0.1332 |
| EGDIVKR                                  | 816.9              | 1            | 1.907  | 0.114  |
| EGDLIAAQR                                | 1044.1             | 2            | 3.1988 | 0.1785 |
| EGDLLFTVAKDPIVNVWYSVNGER                 | 2723.0             | 3            | 4.5978 | 0.3374 |
| EGDLSTKYDAPFVFAEVNADVVDWIQQDDG SVHK      | 3797.0             | 3            | 5.8065 | 0.2846 |

| Peptide Sequence            | Peptide mass (m/z) | Charge State | Xcorr  | DelCn2 |
|-----------------------------|--------------------|--------------|--------|--------|
| EGDNVNYDWIHWDP EHSYEFK      | 2681.8             | 3            | 3.6737 | 0.2035 |
| EGDQTSNNIPADIVFVLK          | 1961.2             | 2            | 3.8907 | 0.3784 |
| EGDTVIFASDDEQDR             | 1697.7             | 2            | 3.7181 | 0.2393 |
| EGDVLTLLESER                | 1361.5             | 2            | 3.9287 | 0.2944 |
| EGDVLTLLESEREAR             | 1717.9             | 2            | 3.1768 | 0.1494 |
| EGDYVLFHHEGGVDVGDVDAK       | 2259.4             | 2            | 5.0813 | 0.4412 |
| EGDYVLFHHEGGVDVGDVDAKAQK    | 2586.8             | 3            | 6.3486 | 0.4192 |
| EGEEAGPGDPLLEAVPK           | 1708.8             | 2            | 3.8273 | 0.3909 |
| EGEFVAQFK                   | 1055.2             | 2            | 2.5774 | 0.3244 |
| EGENPPDGFMAPK               | 1389.5             | 2            | 2.9577 | 0.1192 |
| EGEPGWVHPRGVEQRNKALDWLR     | 2731.0             | 3            | 3.3689 | 0.1533 |
| EGESVTVLR                   | 990.1              | 1            | 2.0153 | 0.1741 |
| EGFFTNGLTLGAK               | 1355.5             | 2            | 3.3109 | 0.3327 |
| EGFHFEETLTGFK               | 1542.7             | 2            | 2.8469 | 0.2808 |
| EGGDGEEQDVG DAGR            | 1491.4             | 2            | 3.6395 | 0.3824 |
| EGGFSPHISPFTAVNDLGHLLGR     | 2422.7             | 3            | 4.7427 | 0.3988 |
| EGGGAIEEEAKEK               | 1347.4             | 2            | 2.7115 | 0.2192 |
| EGGGEGGPHLAVLH SVLHR        | 1923.1             | 2            | 2.9781 | 0.2287 |
| EGGGNNLYGEEMVQALK           | 1810.0             | 2            | 3.769  | 0.2683 |
| EGGLGPLNIPLLADVTR           | 1736.0             | 2            | 4.8481 | 0.4891 |
| EGLLTLGAK                   | 1030.2             | 2            | 2.694  | 0.2461 |
| EGGPNNHLLK                  | 1079.2             | 1            | 1.8408 | 0.1003 |
| EGGQTAPASTR                 | 1075.1             | 2            | 3.5608 | 0.3807 |
| EGGSAGLIPSQFLEEK            | 1662.8             | 2            | 3.7199 | 0.1985 |
| EGGSIPVTLTFQEATGK           | 1735.9             | 2            | 3.7721 | 0.4225 |
| EGGTVVYGGK                  | 967.1              | 2            | 2.4344 | 0.2724 |
| EGGV LKVHPTSTR              | 1381.6             | 2            | 2.7764 | 0.1736 |
| EGHLPSVLAMIHVK              | 1531.8             | 2            | 3.6007 | 0.2911 |
| EGHPVTSEPSRPEPAVFK          | 1965.2             | 2            | 3.8579 | 0.3828 |
| EGHPVYPQLRPGYIPIV LHEGAENR  | 2940.3             | 3            | 5.2005 | 0.3748 |
| EGIDPTPYWYTDQRK             | 2033.2             | 2            | 2.8972 | 0.2553 |
| EGILNDDIYCP PETAVLLASYAVQSK | 2811.2             | 2            | 4.6247 | 0.3403 |
| EGILSDEIYCP PETAVLLGSYAVQAK | 2768.1             | 2            | 4.4369 | 0.4109 |
| EGINIFLDGYVPTENLR           | 1951.2             | 2            | 3.0259 | 0.1703 |
| EGIPALDNFLDKL               | 1445.6             | 2            | 3.9478 | 0.4385 |
| EGIREETVSLRKD               | 1532.7             | 3            | 3.5265 | 0.1636 |

| Peptide Sequence                            | Peptide mass (m/z) | Charge State | Xcorr  | DelCn2 |
|---------------------------------------------|--------------------|--------------|--------|--------|
| EGITVYSMQFGGYAK                             | 1651.9             | 2            | 2.9999 | 0.3068 |
| EGIVTATEQEVEKEDIAK                          | 1861.0             | 2            | 4.2105 | 0.4063 |
| EGKAAEAVAAAVGTGATTAAVMAAAGIAAIGPAKELEAER    | 3668.1             | 3            | 3.9768 | 0.3021 |
| EGKDVNSSSPVMLAFK                            | 1709.9             | 2            | 4.1001 | 0.2761 |
| EGKEHDLSVSSDSTHVTFYGLLR                     | 2578.8             | 3            | 3.4819 | 0.2954 |
| EGKHEPVQPSAHHSAEPAEAGK                      | 2294.4             | 2            | 4.5309 | 0.5031 |
| EGKHEPVQPSAHHSAEPAEAGKAETSEGSGSAPAVPEASASPK | 4206.4             | 3            | 3.752  | 0.3563 |
| EGKLIMGIGHR                                 | 1211.5             | 2            | 3.0246 | 0.2164 |
| EGKLQPHEFQGGTFTISNLGMFGIK                   | 2738.1             | 3            | 4.3818 | 0.382  |
| EGKNLDAVHDITVAYPHNIPQSEK                    | 2676.9             | 3            | 4.224  | 0.3189 |
| EGKPEIEGKPESEGEPEGSETR                      | 2243.3             | 3            | 3.9966 | 0.4023 |
| EGKQFSSADEAALKEPIIK                         | 2062.3             | 2            | 5.2203 | 0.4243 |
| EGKQFSSADEAALKEPIIKKFEIEGPNPYSSAR           | 3721.0             | 3            | 6.362  | 0.4981 |
| EGKVVDK                                     | 846.0              | 1            | 1.9596 | 0.2374 |
| EGLDKLVSDANEQYKLVSDTIGQRVDEIDAAIQR          | 3791.1             | 3            | 3.5619 | 0.2181 |
| EGLLEPEDEEEK                                | 1417.5             | 2            | 2.7265 | 0.2571 |
| EGLLEPEDEEEKK                               | 1545.6             | 2            | 3.11   | 0.1564 |
| EGLLEPEDEEEKKK                              | 1673.8             | 2            | 3.0929 | 0.2622 |
| EGLLEPEDEEEKKKMEESK                         | 2278.5             | 2            | 3.9752 | 0.267  |
| EGLLEPEDEEEKKKQEEK                          | 2188.3             | 2            | 4.1956 | 0.2489 |
| EGLLEPEDEEEKKKQEEKK                         | 2316.5             | 2            | 4.0332 | 0.2707 |
| EGLISQDGSSLEALLR                            | 1688.9             | 2            | 3.9308 | 0.2824 |
| EGLISQDGSSLEALLRTDPLEKR                     | 2528.8             | 3            | 3.7229 | 0.1602 |
| EGLLATHPRPGQERPGVAR                         | 2042.3             | 3            | 3.4224 | 0.2158 |
| EGLNSVIKPTQYKVPDEEPNSTDVEETLER              | 3515.8             | 3            | 4.9397 | 0.3542 |
| EGLPVALDKHILGFDTGDAVLNEAAQILR               | 3077.5             | 3            | 7.7616 | 0.6112 |
| EGLPVEQRNEILTAILASLTAR                      | 2395.7             | 3            | 3.5301 | 0.2315 |
| EGLTSIEEVTKNLQK                             | 1689.9             | 2            | 3.1515 | 0.2576 |
| EGLVMVEVRK                                  | 1160.4             | 2            | 2.9894 | 0.2289 |
| EGMAALQSDPWQQELYR                           | 2023.2             | 2            | 5.0452 | 0.3774 |
| EGMLQHWELGQALR                              | 1668.9             | 2            | 4.1814 | 0.3594 |
| EGMNIVEAMER                                 | 1279.5             | 2            | 3.0758 | 0.2949 |
| EGMTAFVEKR                                  | 1168.3             | 2            | 2.8055 | 0.2585 |
| EGNASGVSLLLEALDTILPPTRPTDKPLR               | 2962.3             | 3            | 4.432  | 0.3636 |
| EGNASGVSLLLEALDTILPPTRPTDKPLRLPLQDVYK       | 3919.5             | 3            | 5.0249 | 0.4647 |
| EGNDLYHEMIESGVINLK                          | 2062.3             | 2            | 5.4105 | 0.4214 |

| Peptide Sequence                       | Peptide mass (m/z) | Charge State | Xcorr  | DelCn2 |
|----------------------------------------|--------------------|--------------|--------|--------|
| EGNDLYHEMIESGVINLKDATSK                | 2564.8             | 2            | 5.6605 | 0.4675 |
| EGNDLYHEMIESGVINLKDATSKVALVYQGMNEPPGAR | 4148.6             | 3            | 6.1567 | 0.3596 |
| EGNGTVMGAEIR                           | 1234.4             | 2            | 3.2345 | 0.2992 |
| EGNLELLKIPNFLHLTPVAIKK                 | 2489.0             | 3            | 4.0456 | 0.2758 |
| EGNNPAENGDAK                           | 1216.2             | 2            | 3.0066 | 0.2822 |
| EGNNPAENGDAKTDQAQK                     | 1887.9             | 2            | 2.8606 | 0.1955 |
| EGNNPAENGDAKTDQAQKAEGAGDAK             | 2587.6             | 3            | 3.5985 | 0.285  |
| EGNSPSFFNPPEEAATVTSYLK                 | 2289.4             | 2            | 2.8382 | 0.2631 |
| EGPAHEPK                               | 864.9              | 1            | 2.0441 | 0.1816 |
| EGPAVVGQFIQDVK                         | 1487.7             | 2            | 2.8584 | 0.246  |
| EGPEGANLFIYHLPQEFGDQDLLQMFMPFGNVVSAK   | 4041.6             | 3            | 3.9361 | 0.2822 |
| EGPYDVVVLPGGNLGAQNLSESAAVK             | 2585.9             | 3            | 5.221  | 0.4682 |
| EGPYDVVVLPGGNLGAQNLSESAAVKEILKEQENR    | 3726.1             | 3            | 4.5917 | 0.3903 |
| EGPYDVVVLPGGNLGAQNLSESAAVKEILKEQENRK   | 3854.3             | 3            | 4.4494 | 0.3631 |
| EGPYSISVLYGDEEVPR                      | 1911.1             | 2            | 4.5657 | 0.3546 |
| EGPYSISVLYGDEEVPRSPFK                  | 2370.6             | 2            | 5.7001 | 0.5034 |
| EGQEDQGLTK                             | 1105.1             | 1            | 2.2229 | 0.2172 |
| EGQEDQGLTKDFSNSPLHR                    | 2159.3             | 3            | 4.464  | 0.2826 |
| EGQEDQGLTKDYGNSPLHR                    | 2145.2             | 2            | 4.4695 | 0.4561 |
| EGRGESENAGTNQETR                       | 1735.7             | 2            | 4.7647 | 0.396  |
| EGRPSGEAFVELESEDEVKLALKK               | 2661.9             | 3            | 3.5475 | 0.1106 |
| EGRPSGEAFVELESEEEVKLALKK               | 2676.0             | 3            | 5.1671 | 0.3155 |
| EGSALTEGAKEEGGEEVAKAVLEQEETAASR        | 3248.4             | 3            | 5.3998 | 0.4296 |
| EGSGGGGGMDDIFSHIFGGGLFGFMGNQSR         | 2993.2             | 3            | 4.1752 | 0.1916 |
| EGSGIGAIDSNLDSHNFNTNMLGYTDHQFTELTR     | 3829.1             | 3            | 5.5417 | 0.3909 |
| EGSGNPTPLINPLAGR                       | 1593.8             | 2            | 2.4474 | 0.3038 |
| EGSGSSGTGEQKEDQKEEK                    | 2011.0             | 2            | 3.4642 | 0.2517 |
| EGSGSSGTGEQKEDQKEEKQ                   | 2139.1             | 2            | 3.9429 | 0.2057 |
| EGSIEIDIPVK                            | 1297.5             | 2            | 3.0669 | 0.1049 |
| EGSLGDELLPLGYSEPEQQEGASAGAPSPTLELASR   | 3657.9             | 3            | 4.4245 | 0.3555 |
| EGSRTDDEVVQR                           | 1391.4             | 2            | 3.6185 | 0.2265 |
| EGSRTDDEVVQREEEAIQLDGLNASQIR           | 3159.3             | 3            | 4.9349 | 0.3169 |
| EGSRTDDEVVQREEEAIQLDGLNASQIRELR        | 3557.8             | 3            | 3.6718 | 0.1546 |
| EGSTHNWQHITDQIGMFCFTGLKPEQVER          | 3390.8             | 3            | 4.7714 | 0.3045 |
| EGTAPSENGETKAEAAQKTESVDNEGE            | 2837.8             | 3            | 3.7852 | 0.2258 |
| EGTEASASKGLEKK                         | 1435.6             | 2            | 3.1354 | 0.2049 |

| Peptide Sequence            | Peptide mass (m/z) | Charge State | Xcorr  | DelCn2 |
|-----------------------------|--------------------|--------------|--------|--------|
| EGTETFADHREGILK             | 1703.8             | 2            | 3.2199 | 0.2982 |
| EGTFTSDVSSYLEGQAAK          | 1891.0             | 2            | 5.2888 | 0.5597 |
| EGTGSTATSSSSTAGAAGK         | 1628.6             | 2            | 4.5206 | 0.4822 |
| EGTINVHDVETQFNQYK           | 2023.1             | 2            | 2.928  | 0.2081 |
| EGTKITFPKEGDQTSNNIPADIVFVLK | 2963.3             | 3            | 3.665  | 0.1633 |
| EGTLTQVPLAPPPPGAPPSPAPAR    | 2319.6             | 3            | 3.6531 | 0.3032 |
| EGVHGGGLNK                  | 968.0              | 1            | 2.6204 | 0.3081 |
| EGVHGGLINK                  | 1024.2             | 1            | 2.7257 | 0.2393 |
| EGVHGGLINKK                 | 1152.3             | 2            | 3.0175 | 0.1701 |
| EGVIGVTEEQVHHIVK            | 1775.0             | 2            | 3.6993 | 0.3659 |
| EGVKFDESEK                  | 1168.2             | 2            | 2.7142 | 0.2822 |
| EGVKFDESEKTK                | 1397.5             | 2            | 3.4207 | 0.2744 |
| EGVKVMPNAIVQSVGVSSGK        | 1987.3             | 3            | 3.9717 | 0.335  |
| EGVLPLTAASTAPISFGFTR        | 2036.3             | 2            | 3.0762 | 0.2716 |
| EGVREVFEMATR                | 1424.6             | 2            | 3.5239 | 0.3268 |
| EGVVGPELHHK                 | 1202.3             | 2            | 2.6686 | 0.2116 |
| EGYLQIGANTQAAQK             | 1592.7             | 2            | 4.7922 | 0.301  |
| EGYNNPPISGENLIGLSR          | 1931.1             | 2            | 3.3655 | 0.2561 |
| EGYSALPQLDIER               | 1491.6             | 2            | 3.4284 | 0.2657 |
| EHAALPR                     | 923.0              | 1            | 2.2278 | 0.2637 |
| EHALAQAELLK                 | 1223.4             | 2            | 2.612  | 0.2454 |
| EHALAQAELLKR                | 1379.6             | 2            | 3.3207 | 0.3859 |
| EHALLAYTLGVK                | 1315.5             | 2            | 4.2902 | 0.4236 |
| EHALTSGTIK                  | 1057.2             | 1            | 2.9673 | 0.333  |
| EHAMLAK                     | 800.0              | 1            | 1.7373 | 0.1556 |
| EHAPSIIFMDEIDSIGSSR         | 2105.3             | 3            | 4.1715 | 0.4766 |
| EHASGSGAQSEAAGR             | 1415.4             | 2            | 4.4427 | 0.5524 |
| EHDVPGQMVNNPK               | 1465.6             | 2            | 3.4494 | 0.4384 |
| EHDVKKEDGTFYEFGEDIPEAPER    | 2839.0             | 3            | 4.2781 | 0.3611 |
| EHEEPTTSEMAEETYSK           | 2096.2             | 2            | 4.7006 | 0.4411 |
| EHEKEVLQK                   | 1140.3             | 2            | 2.4988 | 0.1856 |
| EHFAQFGHVR                  | 1228.3             | 2            | 3.5161 | 0.4271 |
| EHFGTVK                     | 817.9              | 1            | 1.8095 | 0.1115 |
| EHFQHVAAPIYIAK              | 1511.7             | 2            | 3.9972 | 0.4923 |
| EHFQSYDLDHMEK               | 1679.8             | 2            | 4.4565 | 0.4043 |
| EHGAFDAVK                   | 974.1              | 2            | 2.4028 | 0.3066 |

| Peptide Sequence                      | Peptide mass (m/z) | Charge State | Xcorr  | DelCn2 |
|---------------------------------------|--------------------|--------------|--------|--------|
| EHGGPEGMPDGDGVIESNWNEIVDNFDDMNLK      | 3475.7             | 3            | 6.7768 | 0.5243 |
| EHGGPEGMPDGDGVIESNWNEIVDNFDDMNLKESLLR | 4074.4             | 3            | 5.9251 | 0.4244 |
| EHGIR                                 | 611.7              | 1            | 1.6042 | 0.2158 |
| EHGIRFFETSAK                          | 1422.6             | 2            | 3.2143 | 0.3355 |
| EHGLIFMETSAK                          | 1363.6             | 2            | 3.1534 | 0.3179 |
| EHHFEAIALVEK                          | 1423.6             | 2            | 4.0005 | 0.4417 |
| EHHFEGIALVEK                          | 1409.6             | 2            | 2.6329 | 0.1808 |
| EHHFGSSGMTLHER                        | 1625.8             | 2            | 3.4768 | 0.3681 |
| EHIHILER                              | 1047.2             | 2            | 2.4141 | 0.1909 |
| EHIMQMLQNPDWK                         | 1670.9             | 2            | 2.8082 | 0.2643 |
| EHLAMLLSSVLEAKPLLGDQSHAGSELLQR        | 3244.7             | 3            | 4.1604 | 0.3891 |
| EHLGHESDNLLFVQITGK                    | 2038.2             | 3            | 3.7717 | 0.1519 |
| EHLHIVK                               | 876.0              | 1            | 2.2933 | 0.1402 |
| EHLHIVKR                              | 1032.2             | 2            | 2.4437 | 0.2772 |
| EHLAQAWELEVFER                        | 1800.0             | 2            | 3.0519 | 0.1058 |
| EHLTNHLK                              | 1105.3             | 2            | 2.5897 | 0.1735 |
| EHLNEPGTR                             | 1053.1             | 2            | 2.4062 | 0.1485 |
| EHLNKVQTANEVK                         | 1510.7             | 2            | 3.9434 | 0.2991 |
| EHLNQGSSQETDK                         | 1473.5             | 2            | 3.4492 | 0.241  |
| EHMQPETHPIR                           | 1246.4             | 2            | 3.0309 | 0.3053 |
| EHMSSSSSLQSR                          | 1336.4             | 2            | 2.7413 | 0.2691 |
| EHPSLELLHLYFNELSSEGR                  | 2371.6             | 3            | 3.5154 | 0.1425 |
| EHPVLALPGAPAQFPVLEEHRPLQK             | 2775.2             | 3            | 3.544  | 0.1931 |
| EHQAHVENLEADIKR                       | 1789.9             | 3            | 3.982  | 0.3179 |
| EHQEALHQQR                            | 1276.3             | 2            | 3.2357 | 0.3891 |
| EHQHEEIQNVNR                          | 1419.5             | 2            | 3.5325 | 0.3808 |
| EHRSELNLR                             | 1154.3             | 2            | 2.9533 | 0.237  |
| EHSLIKPYQGVGSSSMPLWDFQGSTMLOTSQYVR    | 3732.2             | 3            | 5.0451 | 0.3325 |
| EHSSLGHADLDALQQNPQPLIFHMEMLK          | 3201.6             | 3            | 5.9939 | 0.2994 |
| EHTAYYIK                              | 1025.1             | 1            | 2.1968 | 0.1862 |
| EHTQLLQQSSSQKDEILQTVKEEQSR            | 3071.3             | 3            | 6.0479 | 0.3729 |
| EHTSHLEAELEK                          | 1423.5             | 2            | 3.7874 | 0.3656 |
| EHVKEVQQLQGK                          | 1423.6             | 2            | 4.0661 | 0.355  |
| EHVPSGQFPDTEAPATSETSNSR               | 2445.5             | 3            | 4.4534 | 0.2444 |
| EHVVAASK                              | 840.9              | 1            | 2.5739 | 0.2436 |
| EHYVDLKDRPFFAGLVK                     | 2035.3             | 2            | 2.5991 | 0.1508 |



| Peptide Sequence                   | Peptide mass (m/z) | Charge State | Xcorr  | DelCn2 |
|------------------------------------|--------------------|--------------|--------|--------|
| EIADLGEALATAVIPQWQKDELRETLK        | 3039.4             | 3            | 3.8446 | 0.2408 |
| EIAEEYGGVMVSFPR                    | 1684.9             | 2            | 3.1283 | 0.2538 |
| EIAITHHVK                          | 1048.2             | 2            | 2.4189 | 0.2376 |
| EIAQDFKTDLR                        | 1336.5             | 1            | 3.1963 | 0.2842 |
| EIATLKQHLSNMEVQVASQSSQR            | 2585.9             | 3            | 4.2261 | 0.2951 |
| EIDDYIVQAK                         | 1194.3             | 2            | 2.6622 | 0.1335 |
| EIDGGLETLR                         | 1103.2             | 2            | 2.6843 | 0.1948 |
| EIDIAATLEHVR                       | 1367.5             | 2            | 3.308  | 0.1725 |
| EIDTDSTSQGESK                      | 1397.4             | 2            | 3.4726 | 0.4426 |
| EIEDAAQFATADPEPPLEELGYHIYSSDPPFEVR | 3835.1             | 3            | 5.0568 | 0.3444 |
| EIEDPEDRKPEDWDERPK                 | 2284.4             | 3            | 3.4696 | 0.1304 |
| EIEELKELLPEIR                      | 1611.9             | 2            | 3.8206 | 0.2137 |
| EIEELKQELIQAEIQNGVK                | 2212.5             | 3            | 5.5009 | 0.2827 |
| EIEELQSQAQALSQEGK                  | 1889.0             | 2            | 3.1958 | 0.2936 |
| EIEIAEQDMSALISLR                   | 1819.1             | 2            | 2.4082 | 0.166  |
| EIEIAEQEMPALMALR                   | 1845.2             | 2            | 3.0151 | 0.2532 |
| EIEIDIEPTDKVER                     | 1686.8             | 2            | 3.5574 | 0.3234 |
| EIEKNPPAQGK                        | 1211.3             | 2            | 2.8991 | 0.2292 |
| EIEMASEERPPAQALEIMMGLK             | 2474.9             | 3            | 3.5906 | 0.1852 |
| EIENQKTDAASKPFAEVR                 | 2034.2             | 3            | 3.5488 | 0.2901 |
| EIEQEAAVELSQLRDPQHDLDR             | 2592.8             | 3            | 3.9282 | 0.1078 |
| EIFDSRGNPTVEVDLFTSK                | 2155.4             | 2            | 4.3752 | 0.3757 |
| EIFEQPESVVNTMR                     | 1679.9             | 2            | 4.8866 | 0.416  |
| EIFLRELISNASDALDKIR                | 2204.5             | 3            | 4.7653 | 0.2193 |
| EIFLSQPILLELEAPLK                  | 1954.3             | 2            | 5.5599 | 0.4899 |
| EIFVDFAPFLSR                       | 1441.7             | 2            | 4.2884 | 0.3963 |
| EIGELTQLKELHIQGNR                  | 1979.2             | 3            | 3.9009 | 0.3583 |
| EIGELTQLKELHIQGNRLTVLPPELGNLDTGQK  | 3769.3             | 3            | 3.7204 | 0.2457 |
| EIGGDVQKHAEMVHTGLKLER              | 2348.7             | 3            | 3.7082 | 0.2281 |
| EIGQSVDEVEKLIK                     | 1587.8             | 2            | 3.7271 | 0.2997 |
| EIGQSVDEVEKLIKR                    | 1744.0             | 2            | 3.631  | 0.2666 |
| EIGTHKPLPGITVGDIGPK                | 1930.2             | 2            | 3.4096 | 0.3775 |
| EIGWTDVGGWTGQGGGSILGTK             | 2120.3             | 2            | 2.9847 | 0.3109 |
| EIHQDWANR                          | 1169.2             | 2            | 2.6136 | 0.2006 |
| EIIDPVLDR                          | 1070.2             | 2            | 2.4548 | 0.2749 |
| EIIGVVSQEPVLFATTIAENIR             | 2400.8             | 3            | 3.3193 | 0.2147 |

| Peptide Sequence                     | Peptide mass (m/z) | Charge State | Xcorr  | DelCn2 |
|--------------------------------------|--------------------|--------------|--------|--------|
| EIIHQLSIKPMAHSELVK                   | 2074.5             | 2            | 3.2913 | 0.314  |
| EIIQDVTLHDLVDVANARPQGGQDILSMMGQLMKPK | 3864.5             | 3            | 5.0712 | 0.3958 |
| EIISFGSGYGGNSLLGK                    | 1699.9             | 2            | 2.8059 | 0.1595 |
| EIKDAISGIGTDEK                       | 1476.6             | 2            | 3.7296 | 0.35   |
| EIKDAKEQVSPLETTLEKFQQEKEELINKK       | 3575.0             | 3            | 3.9653 | 0.2278 |
| EIKDILIQYDR                          | 1406.6             | 2            | 3.0773 | 0.2953 |
| EIKDSLAEVEEK                         | 1390.5             | 2            | 3.4246 | 0.3351 |
| EIKEVIELPVKHPELFEALGIAQPK            | 2829.3             | 3            | 5.5232 | 0.3577 |
| EIKNYIQGINLVQAK                      | 1732.0             | 2            | 3.5089 | 0.4013 |
| EIKTVESITDIR                         | 1404.6             | 2            | 2.6597 | 0.104  |
| EIKTVESITDIRADIDKK                   | 2075.3             | 2            | 3.9932 | 0.2876 |
| EILDKFTEEVVK                         | 1450.7             | 2            | 4.1879 | 0.3685 |
| EILDKFTEEVVKQTQR                     | 1964.2             | 3            | 3.6793 | 0.3321 |
| EILDSRGNPTVEVDLYTAK                  | 2121.3             | 2            | 4.5286 | 0.3463 |
| EILGTAQSVGCNVDGR                     | 1619.8             | 2            | 4.1818 | 0.4899 |
| EILGTAQSVGCNVDGRPHPHDIIDDINSGAVECPAS | 3591.9             | 3            | 4.7775 | 0.3233 |
| EILHHVNQAVR                          | 1316.5             | 2            | 3.1041 | 0.3804 |
| EILKEQENRK                           | 1287.4             | 2            | 3.0582 | 0.1523 |
| EILLKGPDWILGEIK                      | 1725.1             | 2            | 3.469  | 0.2396 |
| EILNLTSELLQK                         | 1401.6             | 2            | 3.454  | 0.1936 |
| EILQEEEDLAEIVQLVGK                   | 2056.3             | 2            | 5.484  | 0.4137 |
| EILSVDCSTNNPSQAK                     | 1706.9             | 2            | 4.5285 | 0.383  |
| EILVGDVGQTVDDPYATFVK                 | 2167.4             | 2            | 5.7927 | 0.5294 |
| EIMLAAK                              | 776.0              | 1            | 2.0091 | 0.1339 |
| EINTNQEALKR                          | 1316.4             | 2            | 3.1939 | 0.2192 |
| EIPAKIIFEDDR                         | 1446.6             | 2            | 3.1289 | 0.296  |
| EIQALKDTKPQVQTK                      | 1728.0             | 2            | 4.3933 | 0.3529 |
| EIQEKLDAFIEALHQEK                    | 2042.3             | 3            | 5.0867 | 0.318  |
| EIQELQSKPDR                          | 1343.5             | 2            | 2.9966 | 0.2629 |
| EIQKLETELQEATKEFQIKEDIPETK           | 3119.5             | 3            | 5.9431 | 0.4737 |
| EIQNASHR                             | 955.0              | 2            | 2.857  | 0.1764 |
| EIQNAVNGVK                           | 1072.2             | 2            | 2.5348 | 0.1558 |
| EIQTAVR                              | 816.9              | 1            | 1.8787 | 0.104  |
| EIQTAVRLLLLPGELAK                    | 1752.1             | 2            | 4.2694 | 0.3221 |
| EIQTAVRLLLLPGELAKHAVSEGTK            | 2562.0             | 3            | 5.69   | 0.3914 |
| EIQTTTGNQQVLVR                       | 1587.8             | 2            | 4.2741 | 0.37   |

| Peptide Sequence                        | Peptide mass (m/z) | Charge State | Xcorr  | DelCn2 |
|-----------------------------------------|--------------------|--------------|--------|--------|
| EIQVIPLQRDDED                           | 1570.7             | 2            | 2.5016 | 0.132  |
| EIQVQHAAK                               | 1121.3             | 2            | 2.9874 | 0.1601 |
| EIRPTYAGSK                              | 1122.3             | 2            | 3.0396 | 0.2879 |
| EISEVFPDQFIHLGGDEVEFK                   | 2436.7             | 2            | 3.8773 | 0.4095 |
| EISGHTSGIKK                             | 1157.3             | 2            | 2.9933 | 0.31   |
| EISGLWNELDLSDAVEHQK                     | 2340.5             | 3            | 3.3053 | 0.3024 |
| EISITHHVK                               | 1064.2             | 2            | 2.4492 | 0.2332 |
| EISLWFKPEELVDYK                         | 1897.2             | 2            | 3.4833 | 0.3776 |
| EISNLNQLIEEFKK                          | 1705.9             | 2            | 2.5597 | 0.1695 |
| EISQANKNEDTK                            | 1377.4             | 2            | 2.5281 | 0.1884 |
| EISYENTQISR                             | 1340.4             | 2            | 3.1707 | 0.3009 |
| EISYLESEMYQLSHLLTEQK                    | 2442.7             | 2            | 4.0213 | 0.3669 |
| EITALAPSTMK                             | 1162.4             | 2            | 2.9757 | 0.3097 |
| EITALAPSTMKIK                           | 1403.7             | 2            | 3.1032 | 0.1079 |
| EITFENGEELTEEGLPFLILFHMKEDTESLEIFQNEVAR | 4600.1             | 3            | 3.8935 | 0.2773 |
| EITSLDTENIDEILNNADVALVNFYADWCR          | 3458.8             | 3            | 5.8373 | 0.4397 |
| EIVDPLYGIAEVEIPNIQK                     | 2141.4             | 2            | 3.3599 | 0.2072 |
| EIVDSYLPVILDIK                          | 1731.1             | 2            | 4.895  | 0.5028 |
| EIVHIQAGQCQGNQIGAK                      | 1767.0             | 2            | 4.9935 | 0.3785 |
| EIVHLQAGQCQGNQIGAK                      | 1767.0             | 2            | 5.0534 | 0.3431 |
| EIVTNFLAGFEA                            | 1311.5             | 2            | 2.6057 | 0.2017 |
| EIYKDNR                                 | 938.0              | 2            | 2.5226 | 0.1655 |
| EIYPYVIQELRPTLNELGISTPEELGLDKV          | 3430.9             | 3            | 7.1622 | 0.5855 |
| EKAANSLEAFIFETQDK                       | 1942.1             | 2            | 4.6684 | 0.5054 |
| EKADIQLLVYTIDDLIDK                      | 2106.4             | 3            | 4.3049 | 0.3649 |
| EKADIQLLVYTIDDLIDKLSTIVN                | 2734.1             | 2            | 3.5244 | 0.4288 |
| EKAEGDVAALNR                            | 1273.4             | 2            | 3.396  | 0.3403 |
| EKAPSIIFIDELDAIGTK                      | 1961.2             | 2            | 4.687  | 0.4818 |
| EKAPSIIFIDELDAIGTKR                     | 2117.4             | 3            | 3.945  | 0.3129 |
| EKDFLLKEAVESQR                          | 1692.9             | 2            | 2.9162 | 0.1685 |
| EKDFSPEALKK                             | 1292.5             | 2            | 3.3133 | 0.1924 |
| EKDILVPLDLTDTGSHEAATK                   | 2367.6             | 3            | 5.2204 | 0.4198 |
| EKDIQEESTFSSR                           | 1556.6             | 2            | 4.0909 | 0.3908 |
| EKDKHIEEVR                              | 1283.4             | 2            | 2.806  | 0.2203 |
| EKDKHIEEVRK                             | 1411.6             | 2            | 2.8846 | 0.2345 |
| EKDLEDLFYK                              | 1300.4             | 2            | 3.0436 | 0.143  |

| Peptide Sequence             | Peptide mass (m/z) | Charge State | Xcorr  | DelCn2 |
|------------------------------|--------------------|--------------|--------|--------|
| EKDLTEVSTLKDIFGLASNEHDLISMAK | 2993.3             | 3            | 5.4729 | 0.2696 |
| EKDNIDITLQWLIQHSK            | 2082.3             | 3            | 4.4615 | 0.2974 |
| EKDPFEVDLSHVYLAYTEESLR       | 2641.9             | 3            | 3.9626 | 0.208  |
| EKDRDPEAQFEMPYVVR            | 2110.3             | 3            | 3.8484 | 0.2798 |
| EKDTAVQGNIR                  | 1231.3             | 2            | 2.8402 | 0.2464 |
| EKDVFDIPKWEKG                | 1706.9             | 2            | 3.1582 | 0.3483 |
| EKDVQFEHGYR                  | 1408.5             | 2            | 3.1879 | 0.3107 |
| EKEAAEQAER                   | 1161.2             | 2            | 2.7358 | 0.2208 |
| EKEAAYQER                    | 1124.2             | 2            | 2.5757 | 0.2156 |
| EKEDDVPQFTSAGENFDKLLAGK      | 2539.7             | 3            | 4.166  | 0.31   |
| EKEEFAVPENSSVQQFKKEISKR      | 2740.0             | 3            | 3.7911 | 0.3631 |
| EKEELELLKEDVQDYSEDLQEIKK     | 2952.2             | 3            | 5.3002 | 0.3144 |
| EKEELETGKK                   | 1191.3             | 2            | 2.626  | 0.1483 |
| EKEELMLR                     | 1048.2             | 2            | 2.4786 | 0.1112 |
| EKEFEETMDALQADIDQLEAEKAEKQR  | 3309.6             | 3            | 4.1134 | 0.1898 |
| EKEISGLWNELDSLKDAVEHQR       | 2597.8             | 3            | 4.3583 | 0.4107 |
| EKEKEEPPGEK                  | 1300.4             | 2            | 2.8348 | 0.1597 |
| EKEKEPEKLDKLENSAAPK          | 2184.4             | 2            | 4.6287 | 0.4401 |
| EKEKPSYDTETDPSEGLMNVLK       | 2511.7             | 3            | 3.3558 | 0.1388 |
| EKEPEKPAKPLTAEK              | 1695.9             | 2            | 3.7669 | 0.2228 |
| EKEPEYTLTER                  | 1508.7             | 2            | 3.1259 | 0.116  |
| EKEPIVGSTDYGKDEDSAEALLK      | 2495.7             | 3            | 3.6339 | 0.267  |
| EKEPVVETVEEKKEPILVCPPLR      | 2762.3             | 3            | 4.0176 | 0.2303 |
| EKEQNEAEER                   | 1262.3             | 2            | 2.4634 | 0.119  |
| EKETLAVNYEKEEEFLTNELSR       | 2672.9             | 3            | 4.1309 | 0.3727 |
| EKEVEAIQAQAK                 | 1344.5             | 2            | 3.089  | 0.1542 |
| EKFENLGIQPPK                 | 1400.6             | 2            | 2.5569 | 0.2394 |
| EKGKFEDMAK                   | 1183.4             | 2            | 2.7072 | 0.3123 |
| EKGPTLLKHPPAPAEPSSDLASK      | 2371.7             | 3            | 4.3054 | 0.4183 |
| EKGSETDSAQDQPVK              | 1619.7             | 2            | 3.7233 | 0.4493 |
| EKGTWVQLKR                   | 1245.5             | 2            | 2.7607 | 0.1121 |
| EKHAHSILQFQFAEVK             | 1913.2             | 2            | 3.9139 | 0.38   |
| EKHGEEFFPTSNSLLHGTHVPSTEEIDR | 3195.4             | 3            | 3.3295 | 0.201  |
| EKIDFADTVTK                  | 1267.4             | 2            | 2.6453 | 0.188  |
| EKIDLENTLEQEALVNR            | 2272.5             | 2            | 5.8904 | 0.4009 |
| EKIEDAKESQR                  | 1333.4             | 2            | 2.8707 | 0.2436 |

| Peptide Sequence               | Peptide mass (m/z) | Charge State | Xcorr  | DelCn2 |
|--------------------------------|--------------------|--------------|--------|--------|
| EKISALQSAGVVVSMSPAQLGTTIYKEFEK | 3213.7             | 3            | 6.1689 | 0.4651 |
| EKIVAPISDSPKPPPQR              | 1860.1             | 2            | 3.9035 | 0.4486 |
| EKKDELDSLITAITTNGAHPSK         | 2369.6             | 3            | 3.6156 | 0.2767 |
| EKKEESHSDQSPQIR                | 1913.0             | 2            | 4.504  | 0.3416 |
| EKLAPVPPFSLLQYE                | 1782.1             | 2            | 3.8049 | 0.3842 |
| EKLCFLDKVEPHATIAEIK            | 2185.6             | 2            | 4.6212 | 0.2989 |
| EKLCYVALDFEQEMATAASSSSLEK      | 2752.1             | 2            | 2.4383 | 0.1018 |
| EKLDQLKQEFEFWYPVDLR            | 2484.8             | 3            | 5.0875 | 0.4278 |
| EKLDSVIEFSIPDSLLIR             | 2075.4             | 2            | 5.0109 | 0.4308 |
| EKLDSVIEFSIPDSLLIRR            | 2231.6             | 3            | 3.2606 | 0.3004 |
| EKLEATINELV                    | 1259.4             | 2            | 3.6192 | 0.2883 |
| EKLEAYQHLYFYLLQTNPTYLAK        | 2685.1             | 3            | 5.5098 | 0.4507 |
| EKLEDFFKNMVK                   | 1528.8             | 2            | 2.9139 | 0.2215 |
| EKLEMEMEAAR                    | 1337.5             | 2            | 3.3379 | 0.1607 |
| EKLEMEMEAARHEHQVMLMR           | 2499.9             | 3            | 3.8104 | 0.2455 |
| EKLHIPWGDNSNQHGDK              | 2104.2             | 3            | 3.7168 | 0.1455 |
| EKLILPHVDIQLK                  | 1546.9             | 2            | 4.0913 | 0.2734 |
| EKLKEEENTVGR                   | 1432.6             | 2            | 2.9351 | 0.1583 |
| EKLKSLKSDSCSWAGPTPHTR          | 2242.5             | 2            | 3.119  | 0.1389 |
| EKLQEEMLQREEAENTLQSFR          | 2609.9             | 2            | 4.4442 | 0.3474 |
| EKLQEEMLQREEAENTLQSFRQVDNASLAR | 3680.0             | 3            | 3.3019 | 0.3229 |
| EKLVLTTLDFQK                   | 1435.7             | 2            | 2.994  | 0.1095 |
| EKMDLTAK                       | 936.1              | 1            | 2.0956 | 0.1778 |
| EKMDLTAKELTEEKESAFEFLSSA       | 2735.0             | 2            | 3.0995 | 0.1911 |
| EKNHLQEQK                      | 1154.3             | 2            | 2.6017 | 0.1853 |
| EKNLEEAKK                      | 1089.2             | 2            | 3.0157 | 0.169  |
| EKNQPKPSPK                     | 1153.3             | 2            | 2.5127 | 0.1786 |
| EKNVQGIIEILK                   | 1384.6             | 2            | 3.8554 | 0.2126 |
| EKPEEESLAAPTWLVLHLQQVER        | 2590.9             | 3            | 3.5594 | 0.2571 |
| EKPKSDKTEEIAEEEEETVFPK         | 2464.7             | 3            | 3.7594 | 0.1574 |
| EKPLALYVFSHNHK                 | 1683.9             | 2            | 4.8029 | 0.3927 |
| EKPLIQHPIDSQVAMSEFPAAQPLYDER   | 3211.6             | 3            | 3.3783 | 0.2182 |
| EKPQTLPSAVKGDEK                | 1627.8             | 2            | 3.8541 | 0.3468 |
| EKPSKPTKTEESK                  | 1618.8             | 2            | 3.1658 | 0.3161 |
| EKPYFPIPEEYTFIQNVPLEDR         | 2726.0             | 3            | 6.2709 | 0.409  |
| EKQAKGDTEF                     | 1153.2             | 2            | 2.7962 | 0.157  |

| Peptide Sequence               | Peptide mass (m/z) | Charge State | Xcorr  | DelCn2 |
|--------------------------------|--------------------|--------------|--------|--------|
| EKQAQLAQTLLQQEQASQGLR          | 2384.6             | 3            | 5.7192 | 0.487  |
| EKQDTFALASQQK                  | 1494.6             | 2            | 4.3703 | 0.264  |
| EKQEEIDNYKK                    | 1424.5             | 2            | 3.5022 | 0.1527 |
| EKQLAAENR                      | 1059.2             | 2            | 2.6877 | 0.2578 |
| EKQLSPEAQAR                    | 1257.4             | 2            | 2.9126 | 0.1073 |
| EKQPVAGSEGAQYR                 | 1520.6             | 2            | 3.8311 | 0.3524 |
| EKQPVGTGEGAFYR                 | 1583.7             | 2            | 3.2348 | 0.218  |
| EKQSDDEVYAPGLDISSLKQLAER       | 2822.0             | 3            | 3.3162 | 0.2176 |
| EKRDPGVITYDLPTPPGEKK           | 2241.5             | 3            | 3.7968 | 0.1311 |
| EKRPEAAQLLEDVQAALKPFSVK        | 2569.0             | 3            | 6.9232 | 0.5132 |
| EKSNLAHSLQVAQQQAEELRQER        | 2693.9             | 3            | 4.0575 | 0.2369 |
| EKSSQESGEEAGSQENHPQESK         | 2403.4             | 3            | 5.1089 | 0.4418 |
| EKTHVADFAPEVAWVTR              | 1957.2             | 2            | 4.4915 | 0.5132 |
| EKTLQKPHVDITDPEKPHQPK          | 2579.9             | 3            | 5.3364 | 0.27   |
| EKTPDEKKDEIEK                  | 1589.7             | 2            | 3.777  | 0.2496 |
| EKTPSPKEEDEEPESPPEKK           | 2311.4             | 3            | 4.0087 | 0.162  |
| EKTQQHAGETDPVTTMR              | 2029.2             | 3            | 3.7587 | 0.2433 |
| EKVDLVLLGK                     | 1114.4             | 2            | 2.7515 | 0.318  |
| EKVESELR                       | 990.1              | 1            | 2.2258 | 0.1447 |
| EKVFDVIIR                      | 1119.3             | 2            | 2.6721 | 0.3515 |
| EKVGEVTYVELFKDAEGK             | 2042.3             | 2            | 4.0638 | 0.4219 |
| EKVGEVTYVELLMDAEGK             | 2011.3             | 2            | 4.7931 | 0.5221 |
| EKVHEYNVLETLR                  | 1831.1             | 2            | 3.7657 | 0.4716 |
| EKVLATVTKPVGGDK                | 1542.8             | 2            | 4.6532 | 0.3879 |
| EKVLATVTKPVGGDKNGGTR           | 2028.3             | 3            | 3.4334 | 0.2977 |
| EKVLGADHPDVAK                  | 1379.5             | 2            | 3.503  | 0.255  |
| EKVLGTNHPDVAK                  | 1408.6             | 2            | 3.9972 | 0.3359 |
| EKVMYEKEAK                     | 1255.5             | 2            | 2.8583 | 0.2196 |
| EKVNVDIINFGEEEVNTEKLTAFVNTLNGK | 3366.7             | 3            | 3.4593 | 0.1918 |
| EKVSSIDLEIDSLSSLLDDMTKNPDK     | 3041.4             | 3            | 3.6852 | 0.2095 |
| EKVTEQHR                       | 1027.1             | 2            | 2.5679 | 0.2471 |
| EKVPLADIITPNQFEALLSGR          | 2540.9             | 3            | 6.0757 | 0.3937 |
| EKVVAHYEEQPVVEEVMPVLEEK        | 2700.0             | 3            | 4.8035 | 0.2872 |
| EKVVAHYEEQPVVEEVMPVLEEKER      | 2985.3             | 3            | 6.1106 | 0.4176 |
| EKYEKDIAAYR                    | 1386.5             | 2            | 3.7008 | 0.2827 |
| EKYGIVDYMIEQSGPPSKEILTLK       | 2740.2             | 3            | 4.2636 | 0.4123 |

| Peptide Sequence                     | Peptide mass (m/z) | Charge State | Xcorr  | DelCn2 |
|--------------------------------------|--------------------|--------------|--------|--------|
| EKYGKDATNVGDEGGFAPNILENK             | 2567.7             | 3            | 4.8069 | 0.3046 |
| EKYGKDATNVGDEGGFAPNILENKEGLELLK      | 3350.7             | 3            | 7.3608 | 0.5505 |
| EKYGKDATNVGDEGGFAPNILENKEGLELLKTAIGK | 3821.2             | 3            | 5.1303 | 0.3823 |
| EKYIDQEELNK                          | 1409.5             | 2            | 4.0687 | 0.2868 |
| EKYP SHSFIGEESVAAGEK                 | 2066.2             | 2            | 3.4224 | 0.1276 |
| EKYQEEFEHFQQELDKK                    | 2256.4             | 2            | 3.4793 | 0.208  |
| EKYQEEFEHFQQELDKKKEEFQK              | 3046.3             | 3            | 4.9233 | 0.249  |
| EKYSIGEPTVPSTLAE EFTYNPFMR           | 2908.2             | 3            | 4.4527 | 0.3409 |
| ELAEDDSILK                           | 1133.2             | 2            | 2.8277 | 0.2324 |
| ELAEDGYSGVEVR                        | 1424.5             | 2            | 4.1733 | 0.4251 |
| ELAE EFGVTEYPTLK                     | 1726.9             | 2            | 4.914  | 0.4546 |
| ELAE EKREGYER                        | 1509.6             | 2            | 2.7091 | 0.1568 |
| ELAEQKATEKQHITLALEK                  | 2181.5             | 3            | 4.0455 | 0.325  |
| ELAEQLGLSTGEKEKLPGELEPVQATQNK        | 3138.5             | 3            | 6.1737 | 0.342  |
| ELAESDFASTFR                         | 1373.4             | 2            | 3.4005 | 0.3431 |
| ELAILL GMLDPAEKDEK                   | 1886.2             | 2            | 3.8704 | 0.3169 |
| ELAKVEEEIQTLSQVLA AK                 | 2100.4             | 3            | 4.4479 | 0.23   |
| ELALPGELTQSR                         | 1314.5             | 2            | 2.9866 | 0.2211 |
| ELALQPKDDIVDRAK                      | 1711.9             | 3            | 3.7095 | 0.3047 |
| ELAPYDENW FYTR                       | 1704.8             | 2            | 2.7701 | 0.1898 |
| ELAQNASSDTPMDPVTFIQTLPSDLRR          | 3004.3             | 3            | 4.3099 | 0.3024 |
| ELAQVQVQVAAEYCR                      | 1736.9             | 2            | 3.9082 | 0.3601 |
| ELAQVQVQVADDY GK                     | 1692.8             | 2            | 5.0341 | 0.4258 |
| ELASALKSALSGHLETVILGLLK              | 2364.8             | 3            | 3.7156 | 0.3255 |
| ELASALKSALSGHLETVILGLLKTPAQYDASELK   | 3569.1             | 3            | 6.3694 | 0.4347 |
| ELASLHGTK                            | 956.1              | 1            | 2.6503 | 0.2516 |
| ELASQPDVDGFLVGGASLKPEFVDIINAK        | 3031.4             | 3            | 4.4575 | 0.4564 |
| ELASQPDVDGFLVGGASLKPEFVDIINAKQ       | 3159.5             | 3            | 4.5578 | 0.3654 |
| ELASTTQIDFWKPD SVTQIKPHSTVD FR       | 3248.6             | 3            | 4.9613 | 0.4135 |
| ELAVQIYEEARK                         | 1449.6             | 2            | 3.8153 | 0.2371 |
| ELCHTQSSHASLR                        | 1469.6             | 2            | 3.5261 | 0.3826 |
| ELCQGLGQPGSVLR                       | 1457.7             | 2            | 3.2528 | 0.1872 |
| ELDAFFLHMLMK                         | 1495.8             | 2            | 4.4313 | 0.3786 |
| ELDALDANDEL TPLGR                    | 1742.9             | 2            | 4.3539 | 0.3657 |
| ELDALGHELPVLAPQWEGYDELQTDG NR        | 3167.4             | 3            | 5.6352 | 0.3783 |
| ELDDATEANEGLSR                       | 1520.5             | 2            | 5.1186 | 0.4433 |

| Peptide Sequence                   | Peptide mass (m/z) | Charge State | Xcorr  | DelCn2 |
|------------------------------------|--------------------|--------------|--------|--------|
| ELDDTRASREEILAQAKENEK              | 2446.6             | 3            | 3.5969 | 0.1583 |
| ELDEEGSDPPLPGR                     | 1511.6             | 2            | 2.5092 | 0.2159 |
| ELDELMASLSDFK                      | 1498.7             | 2            | 3.1256 | 0.3992 |
| ELDESLQVAER                        | 1289.4             | 2            | 3.501  | 0.3397 |
| ELDESLQVAERLTR                     | 1659.8             | 2            | 2.7214 | 0.1714 |
| ELDFVSHHVR                         | 1239.4             | 2            | 3.1184 | 0.4095 |
| ELDIMEPKVPDDIYKTHLENNR             | 2671.0             | 3            | 5.0247 | 0.4258 |
| ELDLPVLDLDDISEADLDHPDLFQNR         | 2896.1             | 2            | 3.7707 | 0.2491 |
| ELDLVSHHVR                         | 1205.3             | 2            | 3.5519 | 0.4107 |
| ELDPTNMTYITNQAAVYFEK               | 2349.6             | 3            | 4.2956 | 0.3899 |
| ELDPTNMTYITNQAAVYFEKGDYNK          | 2927.2             | 3            | 3.2342 | 0.1317 |
| ELDRDVFALVNYIFFK                   | 2091.4             | 3            | 4.0123 | 0.3131 |
| ELDRNYLNYGEEGAPGK                  | 1926.0             | 2            | 4.5797 | 0.307  |
| ELDRNYLNYGEEGAPGKWQQQGLQDTK        | 3254.4             | 3            | 5.675  | 0.4634 |
| ELDRNYLNYGEEGAPGKWQQQGLQDTKENR     | 3653.8             | 3            | 4.7506 | 0.3006 |
| ELDRNYLNYGEEGAPGKWQQQGLQDTKENREEAR | 4139.3             | 3            | 4.3797 | 0.2617 |
| ELDSITPEVLPGWK                     | 1584.8             | 2            | 4.0647 | 0.3476 |
| ELDSLQTEAESLDNTVKELAEQLEFIK        | 3094.4             | 3            | 3.8245 | 0.2447 |
| ELDSNPFASLVFYWEPLNR                | 2298.5             | 2            | 4.1622 | 0.3099 |
| ELDTNTLKNAGDLLNR                   | 1788.0             | 2            | 3.0405 | 0.1174 |
| ELEAASAPEER                        | 1202.3             | 2            | 2.6327 | 0.1833 |
| ELEAENYHDIKR                       | 1517.6             | 2            | 3.9554 | 0.3423 |
| ELEALDEVFTK                        | 1294.4             | 2            | 3.6411 | 0.3392 |
| ELEDAQAGSGTIGR                     | 1404.5             | 2            | 4.1032 | 0.3737 |
| ELEDATETADAMNR                     | 1566.6             | 2            | 4.6852 | 0.4832 |
| ELEDATETADAMNREVSSLK               | 2210.4             | 2            | 4.469  | 0.3973 |
| ELEDATETADAMNREVSSLKNK             | 2452.6             | 2            | 4.654  | 0.3586 |
| ELEDFKLQHGSI LGFPK                 | 1959.2             | 3            | 4.8497 | 0.3975 |
| ELEDKVIELHK                        | 1353.5             | 2            | 3.5252 | 0.217  |
| ELEDLEHLQLDFWR                     | 1844.0             | 2            | 2.8522 | 0.2335 |
| ELEDVTESAESMNR                     | 1610.7             | 2            | 4.4872 | 0.4251 |
| ELEDYIDNLLVR                       | 1492.7             | 2            | 4.1986 | 0.3322 |
| ELEEAMAGER                         | 1135.2             | 2            | 2.7618 | 0.3105 |
| ELEEIVQPIISK                       | 1398.6             | 2            | 4.3341 | 0.2926 |
| ELEEQLENETLHKEIHNLK                | 2347.6             | 3            | 4.3423 | 0.3083 |
| ELEEVSPEPVPVVPATTQRTLAR            | 2424.7             | 3            | 3.3612 | 0.1098 |



| Peptide Sequence                  | Peptide mass (m/z) | Charge State | Xcorr  | DelCn2 |
|-----------------------------------|--------------------|--------------|--------|--------|
| ELEKTYSAKLDNAR                    | 1638.8             | 2            | 3.5419 | 0.4037 |
| ELELKVPLVVR                       | 1295.6             | 2            | 3.2497 | 0.2358 |
| ELELQKEQR                         | 1173.3             | 2            | 2.6358 | 0.1176 |
| ELELVYAR                          | 993.1              | 1            | 2.2513 | 0.2606 |
| ELENIIQETEKELDPDGLKK              | 2342.6             | 3            | 3.6495 | 0.2947 |
| ELENLAAMDLELQK                    | 1617.8             | 2            | 5.4247 | 0.3536 |
| ELEQVCNPIISGLYQGAGGPGGGFGAQQGPK   | 3000.3             | 3            | 5.6381 | 0.4902 |
| ELESAHHPFTAPHPSDIHLLYTEPK         | 2868.2             | 3            | 3.9437 | 0.1968 |
| ELESQISELQEDLESER                 | 2035.1             | 3            | 5.5953 | 0.5273 |
| ELESVCVVEAGPGTCTFDHRHLYTK         | 2793.1             | 3            | 3.2023 | 0.1729 |
| ELETVAAHQFPEVR                    | 1626.8             | 2            | 2.5937 | 0.126  |
| ELEVQHPAAK                        | 1122.3             | 2            | 3.2668 | 0.3138 |
| ELFPAAQVDKEHLFPAAQVK              | 2352.7             | 3            | 3.5476 | 0.1576 |
| ELFSNLQEFAGPSGK                   | 1624.8             | 2            | 4.4725 | 0.3851 |
| ELFSPLHALNFGIGGDGTQHVLWR          | 2666.0             | 3            | 4.8433 | 0.4131 |
| ELFSPLHALNFGIGGDTR                | 2046.3             | 2            | 5.4873 | 0.5193 |
| ELGDHVTNLR                        | 1154.3             | 2            | 2.6688 | 0.3023 |
| ELGEDGLKAYTEVK                    | 1552.7             | 2            | 3.1842 | 0.2007 |
| ELGENLTDEELQEMIDEADRDGDGEVSEQEFLR | 3812.9             | 3            | 5.2105 | 0.4174 |
| ELGEYGFHEYTEVK                    | 1701.8             | 2            | 3.9956 | 0.4461 |
| ELGEYGLQAYTEVK                    | 1600.8             | 2            | 4.0784 | 0.4596 |
| ELGIETYKVNVSER                    | 1637.8             | 2            | 3.6765 | 0.4106 |
| ELGITALHIK                        | 1095.3             | 2            | 3.1572 | 0.2451 |
| ELGIWEPLAVK                       | 1255.5             | 2            | 3.1647 | 0.2671 |
| ELGLEKDDKDAIEEK                   | 1732.9             | 2            | 4.6126 | 0.3365 |
| ELGLETYKVNEVER                    | 1679.9             | 2            | 3.7678 | 0.3281 |
| ELGLGRHENAIK                      | 1337.5             | 2            | 2.6784 | 0.1057 |
| ELGLPEELVSRHPFPGPLAIR             | 2385.7             | 3            | 4.5371 | 0.3843 |
| ELGQSLAQEVK                       | 1202.3             | 2            | 2.5744 | 0.1418 |
| ELGSSVALYSR                       | 1182.3             | 2            | 2.9637 | 0.3801 |
| ELGVGIALR                         | 928.1              | 2            | 2.7373 | 0.1849 |
| ELGVGIALRK                        | 1056.3             | 2            | 3.0248 | 0.3221 |
| ELHDLFNLPHDRPYFK                  | 2042.3             | 2            | 3.4127 | 0.2654 |
| ELHEQLVALDKQNK                    | 1665.9             | 2            | 5.1921 | 0.3342 |
| ELHINLIPNKQDR                     | 1590.8             | 2            | 4.0303 | 0.3485 |
| ELHLDNNKLAR                       | 1323.5             | 2            | 3.5887 | 0.2904 |

| Peptide Sequence                | Peptide mass (m/z) | Charge State | Xcorr  | DelCn2 |
|---------------------------------|--------------------|--------------|--------|--------|
| ELHLDNNKLTR                     | 1353.5             | 2            | 2.4153 | 0.1026 |
| ELHPPATSHEAPGTK                 | 1572.7             | 2            | 3.007  | 0.287  |
| ELHSEFSEVMNEIWASDQIR            | 2421.6             | 2            | 5.6275 | 0.4621 |
| ELIAEHKPHIDK                    | 1430.6             | 2            | 3.1478 | 0.2592 |
| ELIEIISGAAALD                   | 1315.5             | 2            | 3.666  | 0.3271 |
| ELIEKNSQLEQENLLK                | 2043.3             | 3            | 3.5015 | 0.1808 |
| ELIIGDRQTGK                     | 1230.4             | 2            | 3.2137 | 0.1981 |
| ELIKVLEEANQAINPK                | 1810.1             | 2            | 4.3898 | 0.3108 |
| ELIPTEEALRLLDATLGGIVDPR         | 2692.1             | 3            | 4.3178 | 0.3168 |
| ELIQKELTIGSK                    | 1359.6             | 2            | 3.8974 | 0.2595 |
| ELIQKELTIGSKLQDAEIAR            | 2256.6             | 3            | 3.4317 | 0.2387 |
| ELIQTSALNFLTPLR                 | 1717.0             | 2            | 2.9702 | 0.1349 |
| ELISNASDALDK                    | 1276.4             | 2            | 3.2986 | 0.2931 |
| ELISNASDALDKIR                  | 1545.7             | 2            | 4.0443 | 0.4132 |
| ELISNASDALDKIRYESLTDPSKLDGK     | 3067.4             | 3            | 4.653  | 0.2933 |
| ELISNASDALDKIRYESLTDPSKLDGKELK  | 3437.8             | 3            | 4.9714 | 0.339  |
| ELISNASDALEKLR                  | 1559.7             | 2            | 2.9371 | 0.2234 |
| ELISNSSDALDK                    | 1292.4             | 2            | 3.3039 | 0.301  |
| ELISNSSDALDKIR                  | 1561.7             | 2            | 4.0377 | 0.3199 |
| ELKDDLKGDLSGHFEHLMVALVTPPAVFDAK | 3394.9             | 3            | 4.4142 | 0.284  |
| ELKDLLTELQK                     | 1330.6             | 2            | 3.0281 | 0.2094 |
| ELKEALGIPAAASFK                 | 1545.8             | 2            | 4.0282 | 0.3542 |
| ELKELIQKELTIGSK                 | 1730.0             | 2            | 4.0904 | 0.3318 |
| ELKELIQKELTIGSKLQDAEIAR         | 2627.0             | 3            | 4.6157 | 0.3993 |
| ELKGYSIPFMGSDVSVVR              | 1985.3             | 2            | 3.4102 | 0.3271 |
| ELKIDIIPNPQER                   | 1565.8             | 2            | 3.2559 | 0.3055 |
| ELKKDPKPSVSR                    | 1384.6             | 2            | 2.8394 | 0.2323 |
| ELKLLESIFHR                     | 1385.6             | 2            | 3.0104 | 0.2649 |
| ELKQQMQDIQAEIDAHNDIFK           | 2515.8             | 3            | 4.6232 | 0.3042 |
| ELKREPAVGEPAEVTTTLVLR           | 2295.6             | 3            | 3.4352 | 0.196  |
| ELKTDNLPNQAR                    | 1399.5             | 2            | 3.2531 | 0.2647 |
| ELKTDSSPNQAR                    | 1346.4             | 2            | 2.7843 | 0.1812 |
| ELLAQYQDLTFLTK                  | 1684.9             | 2            | 2.4366 | 0.22   |
| ELLFHPALFEVPSLK                 | 1741.1             | 2            | 4.2481 | 0.3673 |
| ELLHSHVHPESPVLK                 | 1600.8             | 2            | 4.123  | 0.3823 |
| ELLIFLAQYLCNEYQK                | 1989.3             | 2            | 2.4511 | 0.1058 |

| Peptide Sequence                   | Peptide mass (m/z) | Charge State | Xcorr  | DelCn2 |
|------------------------------------|--------------------|--------------|--------|--------|
| ELLIIGGVAAR                        | 1112.3             | 2            | 2.9592 | 0.2256 |
| ELLDKVEVVRPLEK                     | 1668.0             | 2            | 3.3312 | 0.1385 |
| ELLKPNASVALHK                      | 1420.7             | 2            | 3.3773 | 0.1155 |
| ELLLDKLLETPSTLHDQKR                | 2250.6             | 3            | 3.6141 | 0.103  |
| ELLLQPVTISR                        | 1269.5             | 2            | 3.3641 | 0.1733 |
| ELLLTGPGLEER                       | 1327.5             | 2            | 3.5635 | 0.3175 |
| ELLMGIFEMGWKPSPIQEESEPIALSGR       | 3259.8             | 3            | 4.9688 | 0.4024 |
| ELLPLIYHHLLR                       | 1517.8             | 2            | 3.2839 | 0.3993 |
| ELLPVKKFESEILEAISQNSVVIIR          | 2856.3             | 3            | 3.3005 | 0.1204 |
| ELLQHPFLK                          | 1125.3             | 2            | 2.4495 | 0.201  |
| ELLQHQFLK                          | 1156.4             | 2            | 2.9341 | 0.1692 |
| ELLREETGAALKPR                     | 1583.8             | 3            | 4.8404 | 0.2803 |
| ELLTEFGYKGEETPVIVGSALCALEGRDPELGLK | 3636.1             | 3            | 3.7681 | 0.2767 |
| ELLTTMGDR                          | 1036.2             | 2            | 2.6783 | 0.292  |
| ELLTTMGDRFTDEEVDLYR                | 2433.6             | 3            | 5.3645 | 0.4521 |
| ELLTTMGDRFTDEEVDLYREAPIDKK         | 3215.5             | 3            | 3.3278 | 0.1617 |
| ELLVIELSDNPGVHEPGEPEFK             | 2449.7             | 3            | 4.5813 | 0.4309 |
| ELMLHAADVEALQAAK                   | 1711.0             | 2            | 3.4497 | 0.3277 |
| ELNARPLEVFMCSVLK                   | 1850.2             | 2            | 2.9056 | 0.1572 |
| ELNARPLEVFMCSVLKR                  | 2006.4             | 3            | 5.1576 | 0.3157 |
| ELNARPMVFMCSVLKR                   | 2024.5             | 3            | 3.7792 | 0.2013 |
| ELNEDKLEKLEELTMDGAK                | 2206.5             | 2            | 4.893  | 0.3403 |
| ELNELVSAIEEHFFQPQK                 | 2159.4             | 2            | 5.2174 | 0.4348 |
| ELNELVSAIEEHFFQPQKYNLQPK           | 2903.2             | 3            | 4.2147 | 0.2483 |
| ELNHMLSDTGNR                       | 1387.5             | 2            | 3.091  | 0.3669 |
| ELNHMLSDTGNRK                      | 1515.7             | 2            | 2.7241 | 0.244  |
| ELNITAAK                           | 860.0              | 1            | 1.9153 | 0.1442 |
| ELNITAAKEIEVGGGR                   | 1657.9             | 2            | 4.2159 | 0.4535 |
| ELNITAAKEIEVGGGRK                  | 1786.0             | 2            | 3.9691 | 0.3984 |
| ELNKEEAAQQK                        | 1288.4             | 2            | 3.3323 | 0.1778 |
| ELNKEMAAEK                         | 1163.3             | 2            | 2.5328 | 0.111  |
| ELNKEMAAEKAK                       | 1362.6             | 2            | 3.6521 | 0.285  |
| ELNKPVQGPLAHR                      | 1459.7             | 2            | 2.8981 | 0.301  |
| ELNWDDYKKQEQLTAR                   | 2167.3             | 3            | 3.8442 | 0.2299 |
| ELNYFAKALESPERPFLLAILGGAK          | 2636.0             | 2            | 3.095  | 0.1253 |
| ELPAAVAPAGPASLAR                   | 1491.7             | 2            | 3.9042 | 0.4461 |

| Peptide Sequence                       | Peptide mass (m/z) | Charge State | Xcorr  | DelCn2 |
|----------------------------------------|--------------------|--------------|--------|--------|
| ELPESGIQLGTPR                          | 1397.6             | 2            | 2.7601 | 0.1101 |
| ELPLSPAFFGEDGIFR                       | 1796.0             | 2            | 3.6112 | 0.3271 |
| ELPPGVEELLNKGQDPLADRGEKDTAK            | 2921.2             | 3            | 3.4685 | 0.2913 |
| ELPTAFDYVEFTR                          | 1588.7             | 2            | 3.8272 | 0.46   |
| ELPTEPPYTAYVGNLPFNTVQGDIDAIFK          | 3211.6             | 3            | 5.9471 | 0.4411 |
| ELPTEPPYTAYVGNLPFNTVQGDIDAIFKDLSIR     | 3796.2             | 3            | 4.2932 | 0.4424 |
| ELPVPGSAAEEPPSGGGR                     | 1765.9             | 2            | 2.9609 | 0.3475 |
| ELQAAGKSPEDLER                         | 1543.7             | 2            | 4.4546 | 0.3545 |
| ELQALGFQPGPITDTTR                      | 1845.0             | 2            | 4.0553 | 0.4063 |
| ELQAQIAELQEDFESEK                      | 2008.1             | 2            | 4.6178 | 0.318  |
| ELQDAQEHDAR                            | 1312.3             | 2            | 3.0415 | 0.3268 |
| ELQDLALQGAK                            | 1186.3             | 2            | 3.7752 | 0.29   |
| ELQDLALQGAKER                          | 1471.6             | 2            | 4.161  | 0.2534 |
| ELQEALPEAPAPLLPHITATSLLGTPREPDTEVITVEK | 3981.5             | 3            | 3.3974 | 0.1503 |
| ELQELQDSLNAEREK                        | 1802.9             | 2            | 3.5685 | 0.1449 |
| ELQELSSSIKDLVLK                        | 1703.0             | 2            | 4.7881 | 0.3125 |
| ELQELVQYPVEHPDK                        | 1825.0             | 2            | 3.8814 | 0.3208 |
| ELQELVQYPVEHPDKFLK                     | 2213.5             | 2            | 4.9788 | 0.4045 |
| ELQHAALGGTATR                          | 1325.5             | 2            | 3.5055 | 0.4476 |
| ELQKANQEYAEQK                          | 1636.7             | 2            | 3.8022 | 0.2751 |
| ELQKPDSFHSLTPTFAAVLVHIDNLR             | 2950.3             | 3            | 4.3698 | 0.3039 |
| ELQLEYLLGAFESLGK                       | 1811.1             | 2            | 2.9877 | 0.1932 |
| ELQNTVANLHVR                           | 1394.6             | 2            | 3.7501 | 0.3638 |
| ELQPQQQPR                              | 1124.2             | 2            | 2.4022 | 0.1459 |
| ELQPSEEVTK                             | 1346.5             | 2            | 2.5638 | 0.1385 |
| ELQSQISDTSVVLSMDNSR                    | 2110.3             | 2            | 6.7978 | 0.5947 |
| ELQTLHNLRK                             | 1252.4             | 2            | 2.703  | 0.3025 |
| ELQVGIPVADEAGQR                        | 1582.7             | 2            | 3.3418 | 0.3314 |
| ELRDHADSNIIVMLVGNK                     | 2025.3             | 2            | 3.0939 | 0.171  |
| ELRDLVLQGHHTR                          | 1574.8             | 3            | 4.2867 | 0.2675 |
| ELRENTQTTIK                            | 1333.5             | 2            | 3.359  | 0.236  |
| ELREQLKELTK                            | 1387.6             | 2            | 2.9135 | 0.1201 |
| ELREVIPLTNPELFQR                       | 2197.5             | 3            | 4.345  | 0.1891 |
| ELRFEIGEGENLDLPYGLER                   | 2350.6             | 3            | 5.4866 | 0.3376 |
| ELSAERPLNEQIAEAEED                     | 2044.1             | 2            | 5.152  | 0.3629 |
| ELSAERPLNEQIAEAEEDKI                   | 2285.5             | 2            | 4.994  | 0.3485 |

| Peptide Sequence                       | Peptide mass (m/z) | Charge State | Xcorr  | DelCn2 |
|----------------------------------------|--------------------|--------------|--------|--------|
| ELSAERPLNEQIAEAEEDKIKK                 | 2541.8             | 3            | 5.0699 | 0.3746 |
| ELSAQPEVHR                             | 1166.3             | 2            | 2.8128 | 0.2108 |
| ELSAVTFPDIIR                           | 1361.6             | 2            | 3.2451 | 0.214  |
| ELSDFISYLQR                            | 1371.5             | 2            | 4.1758 | 0.4113 |
| ELSDIAHR                               | 941.0              | 1            | 2.3092 | 0.2798 |
| ELSDPAGAIYTSR                          | 1493.6             | 2            | 2.7665 | 0.1958 |
| ELSEALGQIFDSQR                         | 1593.7             | 2            | 4.7341 | 0.4696 |
| ELSEIAQSIVANGK                         | 1459.6             | 2            | 4.1124 | 0.4293 |
| ELSEIAQSIVANGKGI LA ADES VGT MGNR      | 2932.3             | 3            | 4.2873 | 0.2194 |
| ELSGLSALKNPFGNAGLLLG EAGK              | 2414.7             | 3            | 5.5009 | 0.4077 |
| ELSGLPSGPSAGSGPPPPPPGPPPPVSTSSGSDESASR | 3592.8             | 3            | 5.9952 | 0.5451 |
| ELSHEDLEPPPEHIPPPRPPKR                 | 2666.0             | 3            | 4.2051 | 0.3242 |
| ELSHLQSENDAAKDEVKEVLQALEELAVNYDQK      | 3758.1             | 3            | 4.0986 | 0.2854 |
| ELSLAGNELGDEGAR                        | 1531.6             | 2            | 3.8254 | 0.3826 |
| ELSQLQELSNHQK                          | 1554.7             | 2            | 4.0009 | 0.3443 |
| ELSSTEAQLHDAQELLQEETRAK                | 2627.8             | 3            | 4.1899 | 0.2825 |
| ELSYMVVSRGQLVAVGK                      | 1837.2             | 2            | 2.8045 | 0.1144 |
| ELTALLHHYYPIDPHR                       | 2218.5             | 3            | 3.6903 | 0.2719 |
| ELTDEEAERLQLEIDQKKDAENHEAQLK           | 3324.6             | 3            | 5.7624 | 0.3454 |
| ELTEEKESAFEFLSSA                       | 1817.9             | 2            | 4.1187 | 0.4291 |
| ELTIGSK                                | 747.9              | 1            | 1.7257 | 0.2576 |
| ELTLQAMADGVNK                          | 1390.6             | 2            | 4.6443 | 0.4122 |
| ELTNQQEASVER                           | 1404.5             | 2            | 3.6847 | 0.327  |
| ELTPQVVSAAR                            | 1171.3             | 2            | 2.4611 | 0.229  |
| ELTQIKQKVDSLLENLEK                     | 2129.4             | 2            | 2.643  | 0.1769 |
| ELTSELKENFIR                           | 1479.7             | 2            | 3.7211 | 0.3053 |
| ELTVSNNDINEAGVR                        | 1631.7             | 2            | 4.4714 | 0.3784 |
| ELVAENLSVR                             | 1130.3             | 2            | 2.5338 | 0.2247 |
| ELVASGENKIK                            | 1188.4             | 2            | 3.0161 | 0.2429 |
| ELVDDSVNNVR                            | 1260.3             | 2            | 3.4086 | 0.3487 |
| ELVDDSVNNVRKDDPTLLSSGR                 | 2430.6             | 3            | 3.6392 | 0.2413 |
| ELVDYFLNVATAQGR                        | 1696.9             | 2            | 4.7006 | 0.5006 |
| ELVEKSEAVR                             | 1160.3             | 2            | 2.4691 | 0.2669 |
| ELVEPVSR                               | 929.1              | 1            | 1.9649 | 0.1004 |
| ELVFKEDGQEYAQVIK                       | 1897.1             | 2            | 5.0713 | 0.3712 |
| ELVLDNSR                               | 946.0              | 2            | 2.7189 | 0.1816 |

| Peptide Sequence                            | Peptide mass (m/z) | Charge State | Xcorr  | DelCn2 |
|---------------------------------------------|--------------------|--------------|--------|--------|
| ELVSCSNCTDYQAR                              | 1589.7             | 2            | 2.7687 | 0.1614 |
| ELVSDANQHVK                                 | 1240.3             | 2            | 2.6584 | 0.2067 |
| ELVSLKQEQQAFK                               | 1548.8             | 2            | 3.8383 | 0.3539 |
| ELVSLKQEQQAFKEAADTER                        | 2321.5             | 2            | 4.6954 | 0.4205 |
| ELVSLKQEQQAFKEAADTERLALQALTEK               | 3289.7             | 3            | 5.6701 | 0.4175 |
| ELVVTQLGYDTR                                | 1394.6             | 2            | 3.2662 | 0.3429 |
| ELVYPPDYNPEGK                               | 1521.7             | 2            | 2.9936 | 0.2034 |
| ELWFSDDPNVTK                                | 1451.6             | 2            | 3.5641 | 0.3594 |
| ELYERPPHLFAIADAAYK                          | 2105.4             | 3            | 4.5748 | 0.3594 |
| ELYLSHNGIEVIEGLENNKLTMLDIASNR               | 3401.8             | 3            | 4.1671 | 0.3193 |
| ELYSILQHK                                   | 1131.3             | 2            | 2.7831 | 0.1587 |
| ELYVPENKLHLAK                               | 1554.8             | 2            | 3.5499 | 0.2675 |
| EMAEKEKEKIER                                | 1520.7             | 2            | 2.8572 | 0.1335 |
| EMAGDNKLLGQFTLIGIPPAPR                      | 2339.7             | 2            | 2.9111 | 0.1915 |
| EMAPAWEALAKEYQDHEDIIIAELDATANELDAFAVHGFPTLK | 4786.3             | 3            | 4.7091 | 0.322  |
| EMDEATAEER                                  | 1252.3             | 2            | 2.6246 | 0.2834 |
| EMDEEDKAFK                                  | 1242.3             | 2            | 3.1856 | 0.2346 |
| EMDEEDKAFKQK                                | 1498.6             | 2            | 2.9521 | 0.1046 |
| EMDEQIR                                     | 921.0              | 1            | 1.9679 | 0.123  |
| EMDPVTQLYTMSTSTLEYK                         | 2151.4             | 2            | 2.5416 | 0.1936 |
| EMDQTMAANAQK                                | 1338.5             | 2            | 4.2673 | 0.3763 |
| EMDQTMAANAQKNK                              | 1580.8             | 2            | 3.2047 | 0.1472 |
| EMDRETLIDVAR                                | 1448.6             | 2            | 3.2806 | 0.1564 |
| EMDSDIETMQQTIEDLEVASDPLYVPDPDPTKFPVNR       | 4237.6             | 3            | 4.7601 | 0.351  |
| EMEALEDER                                   | 1251.3             | 2            | 2.9301 | 0.2727 |
| EMEALEDERK                                  | 1379.5             | 2            | 3.6815 | 0.3348 |
| EMEALEDERKQR                                | 1663.8             | 2            | 3.5059 | 0.1252 |
| EMEDTLNHLK                                  | 1230.4             | 2            | 2.7376 | 0.1954 |
| EMEENFAVEAANYQDTIGR                         | 2188.3             | 2            | 6.1736 | 0.5312 |
| EMEENFAVEAANYQDTIGRLQDEIQNMKEEMAR           | 3905.3             | 3            | 5.5917 | 0.4276 |
| EMFNPMYALFR                                 | 1419.7             | 2            | 3.1713 | 0.2824 |
| EMGSEVSEDSEEKDVVNVLQAVGESLAK                | 2980.2             | 3            | 4.5277 | 0.3572 |
| EMIDIYSTREPQLAFHQR                          | 2235.5             | 3            | 5.0647 | 0.3073 |
| EMIQLPGARPILDPVDFLGLQDKIK                   | 2808.3             | 3            | 3.9161 | 0.2225 |
| EMKPGFYHGHVSYLDFAK                          | 2127.4             | 2            | 3.664  | 0.1745 |
| EMLNLYIENEGK                                | 1453.6             | 2            | 3.2307 | 0.2714 |

| Peptide Sequence                         | Peptide mass (m/z) | Charge State | Xcorr  | DelCn2 |
|------------------------------------------|--------------------|--------------|--------|--------|
| EMLNSVMQELEDYSEGGPLYK                    | 2433.7             | 2            | 2.7441 | 0.1447 |
| EMNADAVFAFQLR                            | 1512.7             | 2            | 2.6199 | 0.2072 |
| EMNDAAMFYTNR                             | 1463.6             | 2            | 4.0661 | 0.398  |
| EMNLSETAFIR                              | 1311.5             | 2            | 3.1643 | 0.2343 |
| EMQENDASMR                               | 1211.3             | 2            | 2.674  | 0.2866 |
| EMQENDASMRDVVFNYLHATAFQGTPLAQAVEGPPSENVK | 4324.7             | 3            | 6.1708 | 0.4351 |
| EMQNLSQHGR                               | 1200.3             | 2            | 3.1626 | 0.2615 |
| EMQPTHPIR                                | 1109.3             | 1            | 2.4444 | 0.2805 |
| EMSGDLEEGMLAVVK                          | 1608.9             | 2            | 3.9361 | 0.2927 |
| EMSGDVRDAFVAIVQSVK                       | 1952.2             | 3            | 4.2996 | 0.2074 |
| EMSKEFIEAEMK                             | 1472.7             | 2            | 2.7323 | 0.1525 |
| EMTNEEKNIITNLSK                          | 1765.0             | 2            | 4.0665 | 0.3077 |
| EMVELPLRHPALFK                           | 1681.0             | 2            | 4.3383 | 0.4344 |
| EMYKTDLEKDIISDTSGDFR                     | 2364.6             | 2            | 4.5834 | 0.3561 |
| EMYKTDLEKDIISDTSGDFRK                    | 2492.7             | 3            | 4.5444 | 0.2887 |
| ENAEVDGDDDAEEMEAK                        | 1867.8             | 2            | 3.4433 | 0.3805 |
| ENAPAIIFIDEIDAIATK                       | 1945.2             | 2            | 4.437  | 0.3829 |
| ENAPAIIFIDEIDAIATKR                      | 2101.4             | 3            | 3.3331 | 0.2879 |
| ENDFDRLVLQYAPSA                          | 1738.9             | 2            | 3.1221 | 0.1884 |
| ENERHAFTCRVAGGPGTTPR                     | 2056.3             | 2            | 2.7055 | 0.1555 |
| ENESLTHSTDR                              | 1289.3             | 2            | 3.2745 | 0.3695 |
| ENFIPTIVNFSAEEISDAIR                     | 2266.5             | 2            | 4.9037 | 0.468  |
| ENGDESHLPER                              | 1283.3             | 2            | 2.5752 | 0.2531 |
| ENGHVITISESPEELGTPGPSLPDVPGIESR          | 3102.3             | 3            | 4.2164 | 0.2272 |
| ENGTVTAANASTLNDGAAALVLMTADAAK            | 2763.0             | 2            | 4.5417 | 0.4386 |
| ENGTVTAANASTLNDGAAALVLMTADAAKR           | 2919.2             | 3            | 4.8584 | 0.3689 |
| ENGVTHPIDYHTTDYVDEIKK                    | 2475.7             | 3            | 4.6365 | 0.4131 |
| ENISNAQALLEYHLSYLQEVEQLR                 | 2862.1             | 3            | 3.3345 | 0.174  |
| ENIVEAIIHSPILIR                          | 1734.0             | 2            | 3.1707 | 0.3399 |
| ENKEVVLQWFTENSK                          | 1852.0             | 3            | 3.6161 | 0.1481 |
| ENLATVEGNFASIDER                         | 1765.9             | 2            | 3.4673 | 0.1867 |
| ENLKAAQEEYVK                             | 1422.6             | 2            | 3.8147 | 0.3119 |
| ENLKAAQEEYVKR                            | 1578.8             | 2            | 3.7877 | 0.3746 |
| ENLLEEQGSIALRQEIQIDNQTR                  | 2585.8             | 3            | 3.417  | 0.2997 |
| ENLNKDLLTAAEKYPNVK                       | 2061.3             | 3            | 4.3362 | 0.2862 |
| ENLSDEDKLNNAK                            | 1490.6             | 2            | 4.0323 | 0.27   |

| Peptide Sequence                   | Peptide mass (m/z) | Charge State | Xcorr  | DelCn2 |
|------------------------------------|--------------------|--------------|--------|--------|
| ENNAVYAFLGLTAPPGSK                 | 1850.1             | 2            | 4.343  | 0.4395 |
| ENPHDAVVFHPK                       | 1390.5             | 2            | 2.7343 | 0.2036 |
| ENPLDSSVEFMQIWR                    | 1852.1             | 2            | 3.8118 | 0.2823 |
| ENPVYEKKPK                         | 1232.4             | 2            | 2.7169 | 0.1253 |
| ENPYYSR                            | 1044.1             | 2            | 2.6182 | 0.2618 |
| ENQWFDVGVK                         | 1335.5             | 2            | 3.0428 | 0.1932 |
| ENTEGEYSGIEHVVDGVVQSIK             | 2503.7             | 3            | 4.2225 | 0.3134 |
| ENTQQHITAR                         | 1198.3             | 2            | 2.8616 | 0.217  |
| ENVFQEHQTLK                        | 1373.5             | 2            | 3.4986 | 0.2746 |
| ENVFQEHQTLKEKELETGPK               | 2385.6             | 3            | 4.4152 | 0.3027 |
| ENVLIGDGAGFK                       | 1220.4             | 2            | 3.1046 | 0.1529 |
| ENYSHHTQDDR                        | 1402.4             | 2            | 2.8076 | 0.323  |
| EPAAEIEALLGMDLVR                   | 1728.0             | 2            | 4.3114 | 0.4337 |
| EPAHLMSLFGGKPMIIYK                 | 2033.5             | 2            | 4.0331 | 0.3434 |
| EPAIHSEGQWVTLPAPLDTINVHLR          | 2795.1             | 3            | 3.3198 | 0.2012 |
| EPAVYFKEQFLDGDGWTSR                | 2246.4             | 2            | 4.5505 | 0.4817 |
| EPEKEIRPALELLEPIEQK                | 2262.6             | 3            | 4.12   | 0.2308 |
| EPESILQVLSQMEK                     | 1631.9             | 2            | 2.8823 | 0.1241 |
| EPFTLEAYYSSPQDLPPYDPAIAQFSVQK      | 3303.6             | 3            | 5.1985 | 0.3671 |
| EPLPPIQQHIWNMLNPPAEVTTK            | 2655.1             | 3            | 3.9198 | 0.225  |
| EPLPSLEAVYLITPSEK                  | 1887.2             | 2            | 3.6102 | 0.3351 |
| EPPPEFEFIADPPSISAFDLDVVK           | 2661.0             | 3            | 3.457  | 0.2095 |
| EPQDTYHYLPFSLPHR                   | 2001.2             | 2            | 3.3447 | 0.3736 |
| EPQPIKEVTIMEEKER                   | 1957.2             | 3            | 3.3048 | 0.1391 |
| EPSLATWEATWSEGSK                   | 1779.9             | 2            | 2.4703 | 0.1739 |
| EPSLQPRREATLLPATVAETQQAPRDR        | 3032.4             | 3            | 3.6602 | 0.1357 |
| EPVGDDSEVPENVLSFDDLTADALANLK       | 2975.2             | 3            | 3.4724 | 0.1809 |
| EPVRAPAVAVAPTVPQPPHIVAPVATVPAMPQEK | 3443.1             | 3            | 4.6192 | 0.1797 |
| EPWDGRDGELPVEDDIDLSDELDDLGKDEL     | 3500.6             | 3            | 4.0523 | 0.1443 |
| EQADFAIEALAK                       | 1306.4             | 2            | 3.0259 | 0.3481 |
| EQAEAEVASLNR                       | 1317.4             | 1            | 2.807  | 0.1295 |
| EQAGGDATENFEDVGHSTDAR              | 2207.2             | 2            | 5.4041 | 0.4531 |
| EQDLQLEELR                         | 1273.4             | 2            | 2.4139 | 0.1551 |
| EQDLQLEELRQQVSTLK                  | 2058.3             | 2            | 4.3678 | 0.3971 |
| EQEELENYIEHVLLR                    | 1915.1             | 2            | 4.5155 | 0.3369 |
| EQEHMINWVEK                        | 1443.6             | 2            | 2.4005 | 0.1831 |



| Peptide Sequence                          | Peptide mass (m/z) | Charge State | Xcorr  | DelCn2 |
|-------------------------------------------|--------------------|--------------|--------|--------|
| EQEITAVQAR                                | 1145.2             | 2            | 3.0081 | 0.2868 |
| EQELQQTLLQQEQSVLDQLRGEAEAAR               | 2999.2             | 3            | 5.0075 | 0.377  |
| EQELQQTLLQQEQSVLDQLRGEAEAARR              | 3155.4             | 3            | 3.4858 | 0.2302 |
| EQEMTEMRDVMQQQLAEYQELLDVK                 | 3086.5             | 3            | 4.3723 | 0.2511 |
| EQESEKPSQELLEYNIQQK                       | 2321.5             | 3            | 4.1353 | 0.1848 |
| EQFDKTQAISISK                             | 1495.7             | 2            | 3.5602 | 0.3936 |
| EQFDTLTPEPPVDPNQEVPPGPPR                  | 2657.9             | 3            | 3.8079 | 0.2694 |
| EQFEFALTAVAEVNAILK                        | 2123.4             | 2            | 2.4274 | 0.2627 |
| EQFLDGDGWTSR                              | 1411.5             | 2            | 3.5713 | 0.4361 |
| EQGFLSFWR                                 | 1170.3             | 2            | 2.5146 | 0.3036 |
| EQGGSGLGSGLSSGGGGSTSGLGSYIGR              | 2387.4             | 3            | 5.5828 | 0.4672 |
| EQHLLDELSRAQAWSGPSR                       | 2181.4             | 2            | 2.4179 | 0.1487 |
| EQHLTKEER                                 | 1170.3             | 2            | 2.4919 | 0.1138 |
| EQHLYYQDQLLPVSR                           | 1890.1             | 2            | 4.4671 | 0.3977 |
| EQHQHSDLDSNQTHSSGTVTSSSSTANIDDLKK         | 3556.6             | 3            | 4.9198 | 0.3408 |
| EQIESLEHDLQASVDELQDVK                     | 2426.6             | 2            | 2.7806 | 0.1807 |
| EQIGKVDEIFGQLR                            | 1632.8             | 2            | 2.6412 | 0.2195 |
| EQISDIDDAVR                               | 1261.3             | 2            | 2.6659 | 0.2707 |
| EQIVPKPEEEVAQK                            | 1624.8             | 2            | 3.5397 | 0.338  |
| EQIVPKPEEEVAQKK                           | 1753.0             | 2            | 2.882  | 0.2045 |
| EQIVVDLSHPGVSEDDQVSR                      | 2210.3             | 2            | 5.9071 | 0.5299 |
| EQLAIAEFAR                                | 1148.3             | 2            | 2.9442 | 0.3177 |
| EQLDKIQSSHNFQLESVNK                       | 2245.4             | 3            | 3.2197 | 0.291  |
| EQLEEEEEAKHNLEK                           | 1855.9             | 2            | 4.8132 | 0.2968 |
| EQLEHIKTHELHL                             | 1627.8             | 2            | 3.0235 | 0.2965 |
| EQLIDMNAEGDETGVMDLLEALQSGAAFR             | 3212.5             | 3            | 4.26   | 0.3557 |
| EQLIDMNAEGDETGVMDLLEALQSGAAFRR            | 3368.7             | 3            | 3.697  | 0.3164 |
| EQLKAVMDDFAAFVEK                          | 1842.1             | 2            | 4.0012 | 0.4481 |
| EQLLLEELVSLVNQR                           | 1784.0             | 2            | 2.6141 | 0.1982 |
| EQLMREEAEQK                               | 1391.5             | 2            | 3.1332 | 0.1422 |
| EQLPPMSEDFLLDALSEDFSGPQNASSLK             | 3167.4             | 3            | 3.7113 | 0.2889 |
| EQLRQEQALLEEIER                           | 1885.1             | 2            | 3.4642 | 0.314  |
| EQLSLLDRFTEDAK                            | 1665.8             | 2            | 3.264  | 0.3348 |
| EQLSLLDRFTEDAKR                           | 1822.0             | 3            | 3.2609 | 0.2177 |
| EQLYEMFQNILGIK                            | 1727.0             | 2            | 4.5231 | 0.3588 |
| EQNGDSLVAHFVAESAVAGSAEANAFSVLQHVVLGAGPHVK | 4087.5             | 3            | 5.0343 | 0.3877 |

| Peptide Sequence                  | Peptide mass (m/z) | Charge State | Xcorr  | DelCn2 |
|-----------------------------------|--------------------|--------------|--------|--------|
| EQPLDEELKDAFQNAVLELGGGLGER        | 2836.1             | 3            | 4.583  | 0.4807 |
| EQPPRFAQPGSFEYAYAMR               | 2304.5             | 2            | 3.9424 | 0.3463 |
| EQPPRFAQPGTFEFYASR                | 2258.4             | 3            | 4.163  | 0.2209 |
| EQQAQVEKEDFSDMVAEHAAK             | 2391.6             | 3            | 5.5626 | 0.4397 |
| EQQEAIEHIDEVQNEIDRLNEQASEEILKVEQK | 3936.2             | 3            | 4.409  | 0.3027 |
| EQQIEEHR                          | 1069.1             | 2            | 2.449  | 0.1349 |
| EQQIVIQSSGGLSK                    | 1474.6             | 2            | 4.1092 | 0.3182 |
| EQQIVIQSSGGLSKDDIENMVK            | 2419.7             | 2            | 4.3793 | 0.4916 |
| EQQLAEIAR                         | 1187.3             | 2            | 2.7634 | 0.1619 |
| EQRDPTVHDDVLELEMDLNR              | 2554.7             | 3            | 4.4142 | 0.233  |
| EQSILELGSLLAK                     | 1401.6             | 2            | 3.1807 | 0.2332 |
| EQSQLTATQTR                       | 1263.3             | 2            | 3.3446 | 0.3523 |
| EQTADGVAVIPVLQR                   | 1596.8             | 2            | 4.3523 | 0.4247 |
| EQTKQVEELSK                       | 1319.4             | 2            | 3.2311 | 0.2233 |
| EQTLSPITISGLHNIAR                 | 1839.0             | 2            | 3.6457 | 0.3349 |
| EQTVSVSGAFQINTFDLR                | 2013.2             | 2            | 2.7998 | 0.1543 |
| EQVANSAFVER                       | 1250.3             | 2            | 2.8324 | 0.3291 |
| EQVLQPVSaelleLDIR                 | 1953.2             | 2            | 2.9964 | 0.2361 |
| EQWDTIEELIR                       | 1432.6             | 2            | 2.8516 | 0.2639 |
| EQWDTIEELIRK                      | 1560.7             | 2            | 3.1247 | 0.2268 |
| EQWTKYEEENFYLEPYLK                | 2410.6             | 2            | 4.33   | 0.45   |
| EQWTKYEEENFYLEPYLKEVIR            | 2908.2             | 3            | 3.9584 | 0.1867 |
| ERADEPQWSLYPSDSQVSEEVK            | 2580.7             | 3            | 4.0179 | 0.262  |
| ERDFTSLENTVEER                    | 1725.8             | 2            | 4.2936 | 0.3652 |
| ERDFTSLENTVEERLTELTK              | 2411.6             | 3            | 4.7769 | 0.3476 |
| ERDSASFNPELLTHILDGSPEK            | 2456.7             | 3            | 4.9196 | 0.2658 |
| ERDSASFNPELLTHILDGSPEKTR          | 2713.9             | 3            | 4.6951 | 0.3004 |
| EREEFLIPIYHQVAVQFADLHDTTPGR       | 3082.4             | 3            | 3.4864 | 0.2381 |
| EREEQETTSSK                       | 1324.3             | 2            | 3.0249 | 0.2943 |
| EREHLEMELEK                       | 1443.6             | 2            | 3.4383 | 0.1795 |
| EREHLEMELEKAEMER                  | 2060.3             | 3            | 4.2067 | 0.2125 |
| ERELQHAALGGTATR                   | 1610.8             | 2            | 4.1749 | 0.354  |
| ERELQNTVANLHVR                    | 1679.9             | 2            | 4.1763 | 0.3579 |
| EREMAEMR                          | 1052.2             | 2            | 2.518  | 0.1424 |
| EREMQNLSQHGR                      | 1485.6             | 2            | 4.4616 | 0.3319 |
| EREVLQLQEEVKNFITR                 | 2132.4             | 3            | 4.8724 | 0.2846 |

| Peptide Sequence                          | Peptide mass (m/z) | Charge State | Xcorr  | DelCn2 |
|-------------------------------------------|--------------------|--------------|--------|--------|
| ERGDYVLAVK                                | 1150.3             | 2            | 2.9675 | 0.1954 |
| ERGEVVPLGPGVPALVANGFLALDVAANR             | 2903.3             | 3            | 4.9139 | 0.4016 |
| ERHGNVASLVQR                              | 1366.5             | 2            | 3.0142 | 0.3753 |
| ERHPGSFDVVHVK                             | 1507.7             | 3            | 3.959  | 0.4052 |
| ERHPGSFDVVHVKDANGNSFATR                   | 2541.7             | 3            | 4.5005 | 0.3109 |
| ERIDNLIDPGSPFLELSQFAGYQLYDNEEVPGGGIITGIGR | 4452.9             | 3            | 4.968  | 0.3346 |
| ERIEAPAGPPSDFGLFLSDDDPKK                  | 2700.0             | 3            | 5.458  | 0.4552 |
| ERIEAPAGPPSDFGLFLSDDDPKKGIWLEAGK          | 3554.9             | 3            | 3.6665 | 0.1939 |
| ERISEQTYQLSR                              | 1510.6             | 2            | 3.9423 | 0.3154 |
| ERLAGLFNEQR                               | 1333.5             | 2            | 2.4745 | 0.145  |
| ERLEHPVLHVSWNDAR                          | 1959.2             | 2            | 3.5138 | 0.2743 |
| ERLEQDLQMQAK                              | 1617.8             | 2            | 4.235  | 0.3188 |
| ERLEQQVPVNQVFGQDEMIDVIGVTK                | 2973.4             | 3            | 5.6943 | 0.4667 |
| ERLQEELSQAESTIDELKEQVDAALGAEEMVEMLTDR     | 4208.6             | 3            | 6.4529 | 0.479  |
| ERMEPTYQLSR                               | 1410.6             | 2            | 2.5198 | 0.151  |
| ERNDLIVFLADQNAPYFKPK                      | 2379.7             | 3            | 6.8956 | 0.506  |
| ERNTDQASMPDNTAAQK                         | 1878.0             | 2            | 5.3347 | 0.4621 |
| ERPAYAVHGNMLHYVK                          | 1886.2             | 3            | 4.5992 | 0.3349 |
| ERPDLEAPAGSPFR                            | 1639.8             | 3            | 3.3393 | 0.2336 |
| ERPGEQSEVAQLIQQTLEQER                     | 2469.7             | 3            | 4.6185 | 0.2237 |
| ERPPEEVAAR                                | 1154.3             | 2            | 2.6533 | 0.2425 |
| ERPPEEVAARLAQQEKQEQVKIESLAK               | 3106.5             | 3            | 3.4635 | 0.1224 |
| ERPPNPIEFLASYLLK                          | 1888.2             | 2            | 4.9236 | 0.4745 |
| ERPSQPEGLR                                | 1169.3             | 2            | 2.5968 | 0.1799 |
| ERPTDEEGFLHPPGEK                          | 1839.0             | 2            | 2.8577 | 0.1078 |
| ERQEAEEAKEALLQASR                         | 1959.1             | 2            | 4.9996 | 0.42   |
| ERQEEQSAAIHISSETLEQKPHFESSTVK             | 3240.5             | 3            | 6.1264 | 0.4201 |
| ERQRMHKLNNAFQALREVIPHVRADKK               | 3286.8             | 3            | 3.3651 | 0.1091 |
| ERQTNPSAMEVEEDDPVPEIR                     | 2442.6             | 3            | 4.1083 | 0.3636 |
| ERQTNPSAMEVEEDDPVPEIRR                    | 2598.8             | 3            | 4.1524 | 0.2322 |
| ERSDTFINLR                                | 1251.4             | 2            | 3.1461 | 0.2027 |
| ERSGVSLAALKK                              | 1259.5             | 3            | 3.6897 | 0.135  |
| ERVEAVNMAEGIIHDTETK                       | 2143.4             | 2            | 4.1824 | 0.3504 |
| ERVWLGWVSHPVLLR                           | 1846.2             | 3            | 3.2494 | 0.1341 |
| ERWEQQADYMGADSFNRIKR                      | 2517.7             | 3            | 4.9193 | 0.3664 |
| ESADPLGAWLQDAR                            | 1529.6             | 2            | 3.1131 | 0.2862 |

| Peptide Sequence                       | Peptide mass (m/z) | Charge State | Xcorr  | DelCn2 |
|----------------------------------------|--------------------|--------------|--------|--------|
| ESAEALATKLNKENK                        | 1646.8             | 2            | 4.1511 | 0.2028 |
| ESAFEFLLSSA                            | 1088.1             | 2            | 2.8226 | 0.1572 |
| ESAINVAEGKK                            | 1146.3             | 2            | 2.8567 | 0.3402 |
| ESALFSTELSVLHNFFSPSPK                  | 2338.6             | 2            | 3.3678 | 0.2617 |
| ESAREEEEEAEQER                         | 1592.6             | 2            | 4.3831 | 0.2715 |
| ESAREEEEEAEQERR                        | 1748.7             | 2            | 4.2216 | 0.2889 |
| ESDDPMAYIHFTAEGEVTFK                   | 2288.5             | 2            | 2.9685 | 0.3094 |
| ESDITKER                               | 978.0              | 1            | 1.71   | 0.1265 |
| ESDLSHVQNK                             | 1157.2             | 2            | 3.1982 | 0.2341 |
| ESDLSSKTQLLQDVQDENKLFK                 | 2566.8             | 3            | 4.6579 | 0.3316 |
| ESDRLEEKGSLETEGALAHSGNPVSK             | 2612.8             | 3            | 4.6285 | 0.2947 |
| ESDVPLKTEEFVTK                         | 1751.9             | 2            | 3.6717 | 0.3211 |
| ESEAVEWQQK                             | 1234.3             | 2            | 2.5786 | 0.1147 |
| ESEIIDFFLGASLKDEVLK                    | 2154.4             | 2            | 3.1105 | 0.2621 |
| ESEKELALVKR                            | 1302.5             | 2            | 2.5203 | 0.1054 |
| ESESVDKVMQK                            | 1395.5             | 2            | 3.4775 | 0.2778 |
| ESESVDKVMQKEHK                         | 1789.9             | 2            | 4.0256 | 0.2446 |
| ESEVKREFK                              | 1152.3             | 1            | 2.3618 | 0.1028 |
| ESGLKYVAVMPPHIGDQPLTGAYTVTL DGR        | 3187.6             | 3            | 3.2099 | 0.1592 |
| ESGTDDFNWIGLHDPK                       | 1931.1             | 2            | 4.177  | 0.3542 |
| ESGTDDFNWIGLHDPKK                      | 2059.2             | 2            | 3.7729 | 0.3607 |
| ESGYMHIQCTKPDTVGSALNDSPVGLAAYILEK      | 3510.0             | 3            | 3.9419 | 0.1739 |
| ESHAKADSAVSQEQLR                       | 1756.9             | 3            | 4.1997 | 0.1301 |
| ESHATLVFHNLLGEIDQQYSR                  | 2458.7             | 3            | 4.5947 | 0.4646 |
| ESHPATVFI FSDLNPLVTLGGNKESFQQPEVR      | 3672.1             | 3            | 4.3579 | 0.3372 |
| ESHPHGVK                               | 891.0              | 1            | 2.185  | 0.1486 |
| ESHRLPVDIAYKR                          | 1584.8             | 3            | 4.3701 | 0.2545 |
| ESIAEHKPHIDK                           | 1404.6             | 2            | 3.2072 | 0.3103 |
| ESKDQLSDDVSK                           | 1351.4             | 2            | 3.4984 | 0.414  |
| ESKDQLSDDVSKVIAYLKR                    | 2195.5             | 3            | 3.2523 | 0.1463 |
| ESKEETPEVTK                            | 1277.4             | 2            | 2.7228 | 0.1034 |
| ESKEQLPPMSEDFLLDALSEDFSGPQNASSLK       | 3511.8             | 3            | 4.427  | 0.2275 |
| ESKEQLPPMSEDFLLDALSEDFSGPQNASSLK FEDAK | 4102.4             | 3            | 3.299  | 0.1822 |
| ESKFFEHFIEGGR                          | 1583.7             | 2            | 2.8999 | 0.2351 |
| ESKKEDLVFIFWAPESAPLK                   | 2335.7             | 3            | 5.7537 | 0.5232 |
| ESKKEDLVFIFWAPESAPLKSK                 | 2550.9             | 3            | 3.9816 | 0.3292 |

| Peptide Sequence                   | Peptide mass (m/z) | Charge State | Xcorr  | DelCn2 |
|------------------------------------|--------------------|--------------|--------|--------|
| ESKPLTAQQTTK                       | 1332.5             | 2            | 2.7624 | 0.2081 |
| ESLAPAAPADPGPASPR                  | 1604.7             | 2            | 2.7004 | 0.2918 |
| ESLDVYELDAK                        | 1282.4             | 2            | 3.5556 | 0.3075 |
| ESLHEVSKSDLGR                      | 1457.6             | 2            | 2.9697 | 0.271  |
| ESLKELSLAGNELGDEGAR                | 1989.1             | 2            | 5.3651 | 0.4313 |
| ESLKPAAKPLPSK                      | 1366.6             | 2            | 2.5963 | 0.2055 |
| ESLQQMAEVTR                        | 1292.4             | 2            | 3.2735 | 0.3241 |
| ESLREVQLEEEAARDLVSK                | 2315.6             | 3            | 4.1488 | 0.225  |
| ESLRQDGHVLAVEVAEEKEQK              | 2395.6             | 3            | 4.7066 | 0.2413 |
| ESLSEEEAQK                         | 1150.2             | 2            | 2.7985 | 0.1921 |
| ESLSTHTSPSQSPNSVHGSR               | 2096.2             | 3            | 3.5556 | 0.2157 |
| ESLTLIVEGKPQIK                     | 1555.8             | 2            | 3.8257 | 0.2416 |
| ESNGPVKVVWGSIK                     | 1401.6             | 2            | 3.4326 | 0.273  |
| ESNTVFSFLGLKPR                     | 1595.8             | 2            | 2.7394 | 0.3773 |
| ESPESEGPIYEGIL                     | 1633.8             | 2            | 3.9556 | 0.3657 |
| ESPEVLLTLDILK                      | 1470.7             | 2            | 3.3682 | 0.2887 |
| ESQAKDVIEEYFK                      | 1586.7             | 2            | 4.3213 | 0.3597 |
| ESQLAHIKDEPPPLSPAPLTPATPSSLDPPFFSR | 3545.0             | 3            | 6.3511 | 0.4443 |
| ESQPLLGTVIDGMLLLK                  | 1828.2             | 2            | 3.5605 | 0.3006 |
| ESQSPDTTIQR                        | 1262.3             | 2            | 2.5631 | 0.2057 |
| ESREAVEKEFEPLLNWMKDK               | 2479.8             | 3            | 4.3134 | 0.1737 |
| ESRKEELMFFLWAPLAPLK                | 2435.9             | 3            | 3.8934 | 0.1634 |
| ESRQEEMNSQQEEEEEMETDAR             | 2586.6             | 3            | 4.528  | 0.227  |
| ESSEKPPEKPAKPER                    | 1709.9             | 2            | 3.055  | 0.2178 |
| ESSETPDQFMTADETR                   | 1844.9             | 2            | 4.6223 | 0.4833 |
| ESSLILAVTPANMDLANSALK              | 2274.6             | 2            | 3.3475 | 0.2233 |
| ESSLPSKEALEPSGENVIQNKESTG          | 2631.8             | 3            | 4.4619 | 0.3137 |
| ESSPLYSPTFSDSTS AVKEK              | 2161.3             | 2            | 4.2211 | 0.3936 |
| ESSSSLVLKEILQEAPELITEQLAHR         | 2922.3             | 3            | 5.0216 | 0.4149 |
| ESSTDDSNVWIGLHDPK                  | 1901.0             | 2            | 4.5122 | 0.4055 |
| ESSTDDSNVWIGLHDPKK                 | 2029.2             | 2            | 4.2331 | 0.4418 |
| ESSTESSQSAKPVSGQDTSGNTEGSPAAEK     | 2955.0             | 3            | 4.6286 | 0.3512 |
| ESSTVFELKR                         | 1196.3             | 2            | 2.7896 | 0.1254 |
| ESTGAQVQVAGDMLPNSTER               | 2091.2             | 2            | 5.9093 | 0.4246 |
| ESTITLQQAIEYEFLSFVR                | 2162.4             | 2            | 4.3857 | 0.4941 |
| ESTLHLVLR                          | 1068.3             | 2            | 3.1321 | 0.3301 |

| Peptide Sequence                              | Peptide mass (m/z) | Charge State | Xcorr  | DelCn2 |
|-----------------------------------------------|--------------------|--------------|--------|--------|
| ESTYQGHHTPPVQK                                | 1609.7             | 2            | 2.8102 | 0.2061 |
| ESVDHLTIPSR                                   | 1254.4             | 2            | 2.5335 | 0.173  |
| ESVFTVEGGHR                                   | 1218.3             | 2            | 3.0268 | 0.3769 |
| ESVLQMMQAGQR                                  | 1378.6             | 2            | 3.1227 | 0.115  |
| ESVLTATSILNNPIVK                              | 1700.0             | 2            | 3.624  | 0.2452 |
| ESVNAAFEMTLTEGSKLEK                           | 2085.3             | 2            | 3.6371 | 0.3893 |
| ESVNYLVSQQNMILLIPTSFSPLK                      | 2610.0             | 2            | 5.0856 | 0.3715 |
| ESVPPSIIMSSQK                                 | 1403.6             | 2            | 2.4718 | 0.1207 |
| ESVQVPDDQDFR                                  | 1435.5             | 2            | 2.4146 | 0.1852 |
| ESWHGKPLPK                                    | 1179.4             | 2            | 2.7582 | 0.2172 |
| ESYDDVSSFR                                    | 1205.2             | 2            | 2.8356 | 0.2261 |
| ESYSIYVYKVLKQVHPDTGISSK                       | 2643.0             | 3            | 4.3799 | 0.3647 |
| ESYSVYVYK                                     | 1138.3             | 1            | 2.2673 | 0.2892 |
| ESYSVYVYKVLKQVHPDTGISSK                       | 2629.0             | 3            | 4.6069 | 0.4545 |
| ESYSVYVYKVLKQVHPDTGISSKAMGIMNSFVNDIFER        | 4355.0             | 3            | 3.2082 | 0.1121 |
| ESYVETELIFALAK                                | 1613.8             | 2            | 4.8987 | 0.4313 |
| ETAAVIFLHGLGDTGHSWADALSTIR                    | 2740.0             | 3            | 6.2944 | 0.5127 |
| ETADAITK                                      | 848.9              | 1            | 1.802  | 0.1299 |
| ETADAITKEAKK                                  | 1305.5             | 2            | 2.6354 | 0.2238 |
| ETAEADVASLNR                                  | 1276.3             | 2            | 3.8713 | 0.3761 |
| ETAENYLGHTAK                                  | 1334.4             | 2            | 2.6634 | 0.1889 |
| ETAGLGRAKAWKGGWNGFLVFSRVPSAGFFASAQVPQGGALRRSR | 4848.5             | 3            | 3.4274 | 0.2671 |
| ETAGNSGSTHEGR                                 | 1303.3             | 2            | 2.8785 | 0.2278 |
| ETAHWKPPPWNVDVPPKDTIVK                        | 2571.9             | 3            | 4.7019 | 0.1854 |
| ETAIELGYLTAEQFDEWVKPK                         | 2468.7             | 2            | 4.433  | 0.3523 |
| ETAKRPVGGFLLDGFQGNPTTLEAR                     | 2676.0             | 3            | 3.2629 | 0.238  |
| ETDLLLDDSLVSIFGNR                             | 1908.1             | 2            | 5.2602 | 0.4694 |
| ETDQKKEAVAPVQEEEDLEKK                         | 2402.6             | 3            | 3.7233 | 0.2404 |
| ETEAEELDAEVLEVFHPTHEWQALQPGQAVPAGSHVR         | 4238.5             | 3            | 4.4628 | 0.2818 |
| ETEFKDDSLPIKR                                 | 1578.7             | 2            | 3.5299 | 0.3176 |
| ETEGDVTSVKDAK                                 | 1379.5             | 2            | 3.6138 | 0.3816 |
| ETEYKDKIPLLQPK                                | 1831.1             | 2            | 3.7676 | 0.244  |
| ETFASTASQLHSNVVNYVQQIVAPK                     | 2733.0             | 3            | 3.6455 | 0.1897 |
| ETGDPGGQLVLAGDPR                              | 1582.7             | 2            | 2.5673 | 0.1226 |
| ETGEHLVHVK                                    | 1149.3             | 2            | 2.6996 | 0.3344 |
| ETGERPSNEEIMR                                 | 1548.7             | 2            | 2.6524 | 0.1532 |

| Peptide Sequence                | Peptide mass (m/z) | Charge State | Xcorr  | DelCn2 |
|---------------------------------|--------------------|--------------|--------|--------|
| ETGVDLTKDNMALQR                 | 1691.9             | 2            | 3.8133 | 0.3087 |
| ETGYVVERPSTTK                   | 1467.6             | 2            | 3.1189 | 0.2666 |
| ETHQQVVSR                       | 1084.2             | 2            | 2.7055 | 0.2466 |
| ETHSIGRD                        | 914.9              | 1            | 2.2395 | 0.2032 |
| ETIEDVEEMLNNLPGVTSVHSR          | 2470.7             | 3            | 4.2028 | 0.272  |
| ETIEQEKQAGES                    | 1349.4             | 2            | 3.7211 | 0.2376 |
| ETIEQERQAGES                    | 1377.4             | 2            | 2.75   | 0.1705 |
| ETIPLQETSLYTQDR                 | 1794.9             | 2            | 3.1548 | 0.1637 |
| ETKTFGGGGGGGAR                  | 1195.3             | 2            | 2.4614 | 0.2515 |
| ETLAQLQQEFQR                    | 1491.6             | 2            | 2.8046 | 0.2086 |
| ETLEKHYGNKPIGMGGTFIIQK          | 2462.9             | 3            | 4.4627 | 0.2611 |
| ETLKRKVSNGRCASPVTGPGSK          | 2273.6             | 2            | 2.4309 | 0.113  |
| ETLPAEQDLTTK                    | 1346.5             | 2            | 2.5677 | 0.2009 |
| ETLRPLAYSTLADLVHHVR             | 2192.5             | 3            | 4.0058 | 0.2605 |
| ETLVYLTHLDYVDTER                | 1968.2             | 2            | 3.382  | 0.4089 |
| ETMVTSTTEPSR                    | 1339.5             | 2            | 3.4199 | 0.4117 |
| ETNELLKELGSLPLPLSTSEQR          | 2455.7             | 3            | 3.6623 | 0.2084 |
| ETNEPVKTK                       | 1046.2             | 1            | 1.8534 | 0.1439 |
| ETNLDSLPLVDTHSK                 | 1669.8             | 2            | 4.3672 | 0.3851 |
| ETNLDSLPLVDTHSKR                | 1826.0             | 2            | 3.8207 | 0.3445 |
| ETPAATEAPSSTPK                  | 1387.5             | 2            | 2.4248 | 0.32   |
| ETPHSPGVEDAPIAK                 | 1548.7             | 2            | 3.4028 | 0.3337 |
| ETPLPIDPSMFPTWPAK               | 1928.2             | 2            | 2.5987 | 0.2386 |
| ETPSQENGPTAK                    | 1259.3             | 2            | 2.5019 | 0.1542 |
| ETRLVLEVAQHLGESTVR              | 2038.3             | 3            | 4.7185 | 0.4429 |
| ETSGNLEQLLLAVVK                 | 1614.9             | 2            | 4.1431 | 0.4215 |
| ETSGSIWQAR                      | 1135.2             | 2            | 2.4087 | 0.1382 |
| ETSKDTETVLK                     | 1251.4             | 2            | 2.7907 | 0.1586 |
| ETSMVHELNR                      | 1216.4             | 2            | 3.1304 | 0.3281 |
| ETSNLYKIQFHNVKPEYLDAYNSLTEAVLPK | 3627.1             | 3            | 4.2839 | 0.2617 |
| ETSSALTHAGAHLDLSAFSSWEELASLGLDR | 3273.5             | 3            | 4.669  | 0.2413 |
| ETSSDVALASHILTALR               | 1785.0             | 2            | 3.4527 | 0.3819 |
| ETSVTPSNLWGGQGLLGVSIR           | 2172.4             | 2            | 3.7018 | 0.2969 |
| ETTDTDADQVIASFK                 | 1742.8             | 2            | 4.4987 | 0.3783 |
| ETTEESIKETER                    | 1452.5             | 2            | 2.5881 | 0.2526 |
| ETVEEQASTTER                    | 1380.4             | 2            | 3.1879 | 0.1882 |

| Peptide Sequence                             | Peptide mass (m/z) | Charge State | Xcorr  | DelCn2 |
|----------------------------------------------|--------------------|--------------|--------|--------|
| ETVEREKEQMMR                                 | 1566.8             | 2            | 2.7505 | 0.1608 |
| ETVFTK                                       | 724.8              | 1            | 2.1416 | 0.137  |
| ETVFTKSPYQEFTDHLVK                           | 2170.4             | 3            | 4.8278 | 0.398  |
| ETVSEESNVLCLSK                               | 1538.7             | 2            | 4.1734 | 0.3361 |
| ETVSQRPGATVPTDFATFPSSAFLR                    | 2684.0             | 3            | 4.1313 | 0.2933 |
| ETVVEVPQVTWEDIGGLEDKR                        | 2499.8             | 2            | 4.1727 | 0.4525 |
| ETVVQQKETLGAQR                               | 1587.8             | 2            | 3.7076 | 0.2038 |
| ETYEVLISFIQAALGDQPR                          | 2151.4             | 2            | 3.5659 | 0.2194 |
| ETYLAILMDR                                   | 1225.4             | 2            | 2.6372 | 0.2104 |
| ETYQKLNQEK                                   | 1281.4             | 2            | 2.4997 | 0.1144 |
| EVAFAQFGSDLDAATQQLLSR                        | 2339.5             | 2            | 7.2861 | 0.5705 |
| EVAFAQFGSDLDAATQQLLSRGVR                     | 2651.9             | 3            | 3.6793 | 0.3276 |
| EVAQVK                                       | 744.9              | 1            | 2.1362 | 0.1003 |
| EVAEATGEDASSPPPK                             | 1656.7             | 2            | 4.3024 | 0.5126 |
| EVAEATGEDASSPPPKTEAASDPQHHPAASEGAAAAAASPPLLR | 4196.5             | 3            | 4.5165 | 0.4094 |
| EVAFFNNFLTDAK                                | 1516.7             | 2            | 3.1236 | 0.3775 |
| EVAGAKPHITAAEGK                              | 1479.7             | 2            | 3.9952 | 0.4231 |
| EVAGHTEQLQMSR                                | 1486.6             | 2            | 4.3784 | 0.4753 |
| EVAGLRQLLLESQSQLDAAKSEAQKQSDDELALVR          | 3726.1             | 3            | 4.7447 | 0.3664 |
| EVAKPSPGEGEVLLK                              | 1553.8             | 2            | 4.0109 | 0.3273 |
| EVALDLSQHK                                   | 1140.3             | 2            | 2.8349 | 0.2171 |
| EVAPDGPLQESSTR                               | 1486.6             | 2            | 3.4369 | 0.4725 |
| EVAQQAVDADVHAVGVSTLAAGHK                     | 2374.6             | 3            | 3.901  | 0.2788 |
| EVARLEAPLEELR                                | 1525.7             | 2            | 3.4099 | 0.3119 |
| EVATNSELVQSGK                                | 1362.5             | 2            | 3.9719 | 0.4606 |
| EVDDLEQWIAER                                 | 1503.6             | 2            | 3.2351 | 0.2675 |
| EVDDLGPVGDIK                                 | 1386.5             | 2            | 4.244  | 0.2571 |
| EVDDLGPVGDIKIIPLYSTLPPQQQR                   | 3150.5             | 3            | 4.5974 | 0.3736 |
| EVDEQMLAIQSK                                 | 1391.6             | 2            | 3.7355 | 0.2527 |
| EVDEQMLNVQNK                                 | 1447.6             | 2            | 4.4984 | 0.2447 |
| EVDIGIPDATGR                                 | 1243.3             | 2            | 3.1173 | 0.3427 |
| EVDIGIPDATGRLEILQIHTK                        | 2319.6             | 2            | 4.3068 | 0.3274 |
| EVDPLVYNMSHEDPGNVSYSEIGGLSEQIR               | 3336.6             | 3            | 6.0228 | 0.4606 |
| EVDVEKVSFAFENPYVDAIK                         | 2153.4             | 3            | 3.8146 | 0.1995 |
| EVDVGLAADVGTLEK                              | 1544.7             | 2            | 3.086  | 0.1099 |
| EVDVGLAADVGTLEK                              | 1543.7             | 2            | 4.2577 | 0.1787 |



| Peptide Sequence                  | Peptide mass (m/z) | Charge State | Xcorr  | DelCn2 |
|-----------------------------------|--------------------|--------------|--------|--------|
| EVDVNLPKADIDVSGPKVDVEVPDVSLEGPEGK | 3447.8             | 3            | 3.863  | 0.2191 |
| EVEEDEYK                          | 1041.0             | 1            | 2.7702 | 0.1997 |
| EVEEDEYKAFYK                      | 1550.6             | 2            | 3.8751 | 0.2933 |
| EVEEPEGIHSK                       | 1367.5             | 2            | 4.0215 | 0.3532 |
| EVEEQHEVNEQLQAR                   | 1838.9             | 2            | 4.2322 | 0.3089 |
| EVEERPEKDFTEK                     | 1636.7             | 2            | 3.9125 | 0.2341 |
| EVEHFLKAEPEKNGEVVHTPETS           | 2706.9             | 3            | 3.3847 | 0.2343 |
| EVEKVKLDQK                        | 1216.4             | 2            | 2.8447 | 0.1294 |
| EVEQFTQVAK                        | 1179.3             | 2            | 2.8156 | 0.214  |
| EVERVVVDALSGLKGDLAGR              | 2084.4             | 3            | 5.1437 | 0.369  |
| EVESMGAHLNAYSTR                   | 1665.8             | 2            | 3.9258 | 0.2571 |
| EVFEDAAEIR                        | 1179.3             | 2            | 2.5543 | 0.1197 |
| EVFEMATR                          | 983.1              | 1            | 2.3786 | 0.1943 |
| EVFLPSTPGLGMHVEVKDPDGK            | 2353.7             | 2            | 4.8821 | 0.3542 |
| EVFPFPEVSQDELNEINQFLGPVEK         | 2906.2             | 3            | 6.1503 | 0.3612 |
| EVGEHLVSIK                        | 1239.4             | 2            | 2.4696 | 0.1575 |
| EVGHNIYILALQLSR                   | 1727.0             | 2            | 3.1449 | 0.3212 |
| EVGKDVSDKLR                       | 1375.5             | 2            | 3.0641 | 0.202  |
| EVGLLKDMSPLETALGKDVTPPPETEVVLIK   | 3668.3             | 3            | 5.1601 | 0.2824 |
| EVGSHFDDFVTNLIK                   | 1851.0             | 2            | 3.6202 | 0.3716 |
| EVGVYEALKDDSWLK                   | 1752.9             | 2            | 4.4839 | 0.4193 |
| EVGVYEALKDDSWLKGEFVTTVQQR         | 2899.2             | 3            | 5.3057 | 0.4014 |
| EVHKQVVESEYEVK                    | 1759.0             | 2            | 3.9527 | 0.3183 |
| EVIDLLKPDQVEGIQK                  | 1825.1             | 2            | 4.7644 | 0.4143 |
| EVIPLPLNPELQFQR                   | 1799.1             | 2            | 4.8046 | 0.3953 |
| EVIPLPVKHPPELFEALGIAQPK           | 2458.9             | 2            | 3.4719 | 0.2766 |
| EVIKTNVSEHEDTDKYL                 | 2178.3             | 2            | 3.8802 | 0.3362 |
| EVIRNDGVLLLQALTR                  | 1811.1             | 2            | 4.0165 | 0.3517 |
| EVKEHVGTDQFGNK                    | 1588.7             | 2            | 4.2628 | 0.4217 |
| EVKEHVGTDQFGNKYYYIPQYK            | 2708.0             | 3            | 3.2242 | 0.2319 |
| EVKEMEQFVK                        | 1267.5             | 2            | 2.4413 | 0.1869 |
| EVKEMEQFVKK                       | 1395.6             | 2            | 3.3279 | 0.225  |
| EVKKEEGEAFAR                      | 1393.5             | 2            | 2.8802 | 0.2663 |
| EVKYEAPQATDGLAGALDAR              | 2076.3             | 2            | 5.0002 | 0.454  |
| EVLAELEALER                       | 1272.4             | 2            | 3.5054 | 0.1717 |
| EVLAGRPLFPHVLCHNCAVEFNFGQK        | 2927.4             | 3            | 6.9558 | 0.474  |

| Peptide Sequence                     | Peptide mass (m/z) | Charge State | Xcorr  | DelCn2 |
|--------------------------------------|--------------------|--------------|--------|--------|
| EVLDKNDMVELLGPRPFAEK                 | 2301.6             | 3            | 3.3063 | 0.2269 |
| EVLDYSTPTTNGTPEAALSEDINLIR           | 2821.0             | 3            | 4.5348 | 0.3823 |
| EVLHGNQR                             | 953.0              | 1            | 2.3976 | 0.188  |
| EVLFPAMKPEDKK                        | 1646.0             | 2            | 3.1843 | 0.2611 |
| EVLPEHVSVLQGVLDLSPDITR               | 2304.6             | 3            | 4.1607 | 0.2982 |
| EVLPLAFLGMHEIADEEK                   | 2042.3             | 2            | 2.9132 | 0.3083 |
| EVLGTGNDEVIGQVLSTLKSEDVPYTAALTAVRPS  | 3575.0             | 3            | 6.3055 | 0.4766 |
| EVLGTGNDEVIGQVLSTLKSEDVPYTAALTAVRPSR | 3731.2             | 3            | 4.8241 | 0.401  |
| EVMQEVAQLSQFDEELYK                   | 2187.4             | 2            | 4.3022 | 0.4816 |
| EVMQEVAQLSQFDEELYKVIGK               | 2584.9             | 2            | 4.3117 | 0.3202 |
| EVMSPLQAMSSYTVAGR                    | 1828.1             | 2            | 3.0796 | 0.2752 |
| EVMVDDRLVTMQIWDTAGQER                | 2493.8             | 3            | 5.1691 | 0.2862 |
| EVNGHEVGNNPK                         | 1294.4             | 2            | 3.5349 | 0.3528 |
| EVNKFQMAYSNLLR                       | 1714.0             | 3            | 3.9191 | 0.4376 |
| EVPEYLHHVNK                          | 1365.5             | 2            | 3.1046 | 0.191  |
| EVPEYLNHVSK                          | 1315.5             | 2            | 2.6057 | 0.1394 |
| EVPVVVPPVGAK                         | 1322.6             | 2            | 3.2043 | 0.2555 |
| EVPNYKLITPAVVSR                      | 1816.1             | 2            | 3.9226 | 0.2594 |
| EVQGFESATFLGYFK                      | 1723.9             | 2            | 4.6861 | 0.4612 |
| EVQGNESDLFMSYFPR                     | 1920.1             | 2            | 4.6107 | 0.4354 |
| EVQISTEKQK                           | 1318.5             | 2            | 2.8475 | 0.1818 |
| EVQKFTEDLVGSVVHVLSHR                 | 2280.6             | 3            | 3.792  | 0.3749 |
| EVQLAQIFEPLSR                        | 1530.8             | 2            | 2.8041 | 0.3436 |
| EVQQGEEFER                           | 1251.3             | 2            | 3.0015 | 0.1911 |
| EVQQKYNMGLPVDFDQYNELHLPVILK          | 3303.8             | 3            | 4.4833 | 0.2444 |
| EVQTNDLK                             | 947.0              | 1            | 2.3511 | 0.1088 |
| EVQTNDLKEVVNK                        | 1516.7             | 2            | 4.8825 | 0.2763 |
| EVQTNDLKEVVNKLIPDSIGKDIEK            | 2826.2             | 3            | 5.9069 | 0.305  |
| EVQTNELKAEK                          | 1289.4             | 2            | 3.7109 | 0.2504 |
| EVRDLEEQIETELGKK                     | 1917.1             | 3            | 4.7746 | 0.1851 |
| EVSDGIIAPGYEEEEALTILSK               | 2235.5             | 3            | 4.8595 | 0.2876 |
| EVSGIKAAYEAEALGDARK                  | 1908.1             | 2            | 4.1941 | 0.3284 |
| EVSMDDHK                             | 961.0              | 1            | 1.8955 | 0.1438 |
| EVSMDDHKLSLDELHR                     | 1925.1             | 2            | 3.6028 | 0.2268 |
| EVSMDDHKLSLDELHRK                    | 2053.3             | 3            | 3.5311 | 0.2609 |
| EVSMKAEDAQR                          | 1264.4             | 2            | 2.4651 | 0.1966 |

| Peptide Sequence                  | Peptide mass (m/z) | Charge State | Xcorr  | DelCn2 |
|-----------------------------------|--------------------|--------------|--------|--------|
| EVSPAPAVAGQSK                     | 1241.4             | 2            | 2.7404 | 0.1673 |
| EVSQPDWTPPEVTLVLTK                | 2137.4             | 2            | 3.4717 | 0.1731 |
| EVSSSFDHVIK                       | 1248.4             | 2            | 3.1711 | 0.271  |
| EVSSSFDHVIKETTR                   | 1735.9             | 2            | 4.4706 | 0.4714 |
| EVSTYIK                           | 840.0              | 1            | 1.8955 | 0.1319 |
| EVTAIETKLEQK                      | 1389.6             | 2            | 2.9123 | 0.1169 |
| EVTDEIVKEFMTPR                    | 1694.9             | 2            | 4.1623 | 0.4347 |
| EVTDKQEFAAR                       | 1423.5             | 2            | 3.3387 | 0.3888 |
| EVTHNIHYETYR                      | 1562.7             | 2            | 3.1815 | 0.3615 |
| EVTINQSLAPLR                      | 1454.7             | 2            | 3.726  | 0.2964 |
| EVTINQSLAPLRRLDADPSLQR            | 2450.8             | 3            | 3.6015 | 0.451  |
| EVTSHFQVTLNDIQLQMEQHNER           | 2798.0             | 3            | 4.2701 | 0.1648 |
| EVVAEVLKAPQVVAEAAK                | 1838.1             | 2            | 4.6008 | 0.3383 |
| EVVAGSHELGGDYEHVTMLQER            | 2528.7             | 3            | 5.3566 | 0.3986 |
| EVVDYIIFGTVIQEVK                  | 1853.1             | 2            | 4.6133 | 0.3101 |
| EVVEAHVDQK                        | 1154.3             | 2            | 3.0851 | 0.3103 |
| EVVEAHVDQKNK                      | 1396.5             | 2            | 3.5884 | 0.2486 |
| EVVEDINKLLK                       | 1300.5             | 2            | 3.4223 | 0.123  |
| EVVEEAENGR                        | 1132.2             | 2            | 2.9087 | 0.2635 |
| EVVETPLLHPER                      | 1419.6             | 2            | 2.9316 | 0.2216 |
| EVVIFGAASELFTK                    | 1511.7             | 2            | 4.6955 | 0.4593 |
| EVVILEDGPLALYPCPACEEKLALPTAALYGLR | 3627.3             | 3            | 4.1334 | 0.3727 |
| EVVIVSATR                         | 974.1              | 2            | 2.8888 | 0.2388 |
| EVVKPLLSTLGEK                     | 1512.8             | 2            | 3.8135 | 0.3567 |
| EVVKPVPITSPAVSK                   | 1551.9             | 2            | 3.5835 | 0.4022 |
| EVVLQWFTENSK                      | 1480.6             | 2            | 3.4228 | 0.3397 |
| EVVQEILQFQEDPQTKEEVASLR           | 2717.0             | 3            | 4.6587 | 0.4071 |
| EVWYFGLHYVDNK                     | 1670.8             | 2            | 3.1264 | 0.2235 |
| EVYQQQQYGGGR                      | 1500.6             | 2            | 4.3125 | 0.4755 |
| EWHHFLVVMNK                       | 1440.7             | 2            | 3.251  | 0.2139 |
| EWNRDVQYR                         | 1266.3             | 2            | 2.5008 | 0.1158 |
| EWGLLEELAR                        | 1303.4             | 2            | 3.3231 | 0.3037 |
| EWVTQASGVWFAK                     | 1509.7             | 2            | 4.3197 | 0.5096 |
| EWVTQATALWTANK                    | 1619.8             | 2            | 4.416  | 0.2114 |
| EYFGGFGEVESIELPMDNK               | 2162.4             | 2            | 5.338  | 0.4874 |
| EYFSWEGAFQHV GK                   | 1685.8             | 2            | 3.3394 | 0.2677 |

| Peptide Sequence                   | Peptide mass (m/z) | Charge State | Xcorr  | DelCn2 |
|------------------------------------|--------------------|--------------|--------|--------|
| EYGGLDVLVNNAGIAFK                  | 1781.0             | 2            | 5.4017 | 0.3731 |
| EYGGLNLVLNNAAVAFK                  | 1780.0             | 2            | 2.8433 | 0.2386 |
| EYGMIIYLGKDTNGENIAESLVAEGLATTR     | 3172.5             | 3            | 4.384  | 0.4246 |
| EYGSLKDSTKDDNSNPGGKTDEPK           | 2583.7             | 3            | 5.2543 | 0.314  |
| EYIEIITSSIKK                       | 1424.7             | 2            | 3.1234 | 0.1588 |
| EYIPGQPPLSQSSDSSPTR                | 2047.2             | 2            | 3.3605 | 0.5146 |
| EYKAGDLVFAK                        | 1241.4             | 2            | 2.8366 | 0.2815 |
| EYKYGAHNYHPLPVALER                 | 2158.4             | 2            | 3.4299 | 0.3436 |
| EYLDNVQLGHILER                     | 1699.9             | 2            | 3.0793 | 0.308  |
| EYLTAEILELAGNAAR                   | 1734.9             | 2            | 5.0177 | 0.3359 |
| EYQDLLNVK                          | 1122.3             | 1            | 2.6542 | 0.1563 |
| EYQELMNVK                          | 1154.3             | 2            | 2.5796 | 0.1966 |
| EYQLNDSAAAYLNDLER                  | 2078.2             | 2            | 5.3148 | 0.46   |
| EYSKEGWEYVK                        | 1418.5             | 2            | 3.2918 | 0.1485 |
| EYSSELNAPSQESDShPR                 | 2034.0             | 2            | 4.2795 | 0.3928 |
| EYTAGREADDIVNWLK                   | 1881.0             | 2            | 2.7129 | 0.1735 |
| EYTINIHKR                          | 1174.3             | 2            | 2.8565 | 0.116  |
| EYVESQLQR                          | 1152.2             | 2            | 2.7453 | 0.1443 |
| EYVNSTSEESHDEDEIRPVQQDLHR          | 3142.2             | 3            | 5.4801 | 0.4369 |
| EYYSEADASHCIQQILESvNHCHLNvGIVHR    | 3467.8             | 3            | 3.6575 | 0.2669 |
| FAAATGATPIAGR                      | 1204.4             | 2            | 4.279  | 0.3859 |
| FAADAVKLER                         | 1120.3             | 2            | 3.4972 | 0.3525 |
| FAAEFKVPAATSaiITNDGIGINPAQTAGNVFLK | 3578.0             | 3            | 6.5539 | 0.5089 |
| FAAEHTIFASNTSSLQITSIANATTR         | 2754.0             | 3            | 4.5184 | 0.3793 |
| FAAKGEGQLGPAER                     | 1431.6             | 2            | 4.316  | 0.3661 |
| FAALDNEEEDKEEEIiKEKEPPKQGK         | 3045.3             | 3            | 4.8221 | 0.2966 |
| FAANPNQNKNVALLSvQLYHSPAR           | 2554.8             | 3            | 4.4697 | 0.2804 |
| FAASGGFLHHMAGLSSSK                 | 1806.0             | 2            | 4.262  | 0.3792 |
| FAATTVEEILAK                       | 1293.5             | 2            | 3.4349 | 0.2188 |
| FAAYFQQGDMEsNGK                    | 1693.8             | 2            | 5.0137 | 0.4593 |
| FAAYFQQGDMEsNGKYITK                | 2199.4             | 2            | 4.5863 | 0.3456 |
| FACESIVEEYEDELIEFFSR               | 2456.7             | 2            | 4.3357 | 0.3406 |
| FADEFNKLAEDFLQ                     | 1687.8             | 2            | 3.7419 | 0.24   |
| FADEHVPGSPFTVK                     | 1531.7             | 2            | 3.6972 | 0.2216 |
| FADLSEAANR                         | 1094.2             | 2            | 4.1647 | 0.2314 |
| FADTEKER                           | 996.1              | 2            | 2.8382 | 0.2368 |

| Peptide Sequence                             | Peptide mass (m/z) | Charge State | Xcorr  | DelCn2 |
|----------------------------------------------|--------------------|--------------|--------|--------|
| FADTRPWDPLNDMIQFEKDGVIQTK                    | 2966.3             | 3            | 4.9752 | 0.3347 |
| FAEAFEAIR                                    | 1151.3             | 2            | 4.0072 | 0.383  |
| FAEEADVIVGAGPAGLSAAVR                        | 2100.4             | 3            | 4.5672 | 0.3542 |
| FAEEDKK                                      | 866.9              | 1            | 2.5143 | 0.1438 |
| FAEEDKKLKER                                  | 1393.6             | 2            | 3.6553 | 0.4014 |
| FAEFQYLQPGPPR                                | 1550.7             | 2            | 3.7498 | 0.3223 |
| FAEKYDSRTELGFTNYIR                           | 2326.5             | 3            | 3.841  | 0.1997 |
| FAELAQIYAQR                                  | 1310.5             | 2            | 3.3448 | 0.2347 |
| FAELRSPNEFK                                  | 1338.5             | 2            | 2.6228 | 0.2326 |
| FAENPKAGDEFVEK                               | 1581.7             | 1            | 4.1443 | 0.2519 |
| FAENPKAGDEFVEKTLSTIATSTDAASVVHSTDLVVEAIVENLK | 4649.1             | 3            | 4.5006 | 0.3577 |
| FAEQDAKEEANK                                 | 1380.4             | 2            | 3.2948 | 0.198  |
| FAEVEHVVNAILFLLSDR                           | 2073.4             | 2            | 2.8965 | 0.2616 |
| FAFDYATKK                                    | 1091.2             | 2            | 2.4618 | 0.1684 |
| FAFQAEVNR                                    | 1082.2             | 2            | 3.323  | 0.2572 |
| FAGDKGYLTK                                   | 1100.2             | 2            | 3.1797 | 0.3222 |
| FAGDKGYLTKEDLR                               | 1613.8             | 2            | 3.5723 | 0.308  |
| FAGGDYTTTIEAFISASGR                          | 1965.1             | 2            | 4.9161 | 0.4608 |
| FAGGLHFSGPK                                  | 1118.3             | 2            | 2.8782 | 0.2588 |
| FAGHNFRNPSVL                                 | 1359.5             | 2            | 2.4609 | 0.1474 |
| FAGHSEAGGGSGDR                               | 1305.3             | 2            | 3.4564 | 0.4177 |
| FAGLHFFNPVPMK                                | 1604.9             | 2            | 4.6124 | 0.4193 |
| FAGSGNEENRNNAYPHK                            | 1906.0             | 2            | 3.3011 | 0.2957 |
| FAGVFHVEKNGR                                 | 1361.5             | 2            | 2.7532 | 0.267  |
| FAHIDGDHLTLLNVYHAFK                          | 2212.5             | 2            | 4.948  | 0.5085 |
| FAHTNVESLVNEYDDNGEGIILFR                     | 2754.0             | 3            | 5.8373 | 0.4916 |
| FAHTNVESLVNEYDDNGEGIILFRPSHLTNK              | 3531.8             | 3            | 6.5851 | 0.5511 |
| FAHTNVESLVNEYDDNGEGIILFRPSHLTNKFEDK          | 4051.4             | 3            | 6.3494 | 0.4743 |
| FAHTNVESLVNEYDDNGEGIILFRPSHLTNKFEDKTVAYTEQK  | 4972.4             | 3            | 4.0566 | 0.3945 |
| FAIQDISVEETSAK                               | 1538.7             | 2            | 3.9871 | 0.3378 |
| FAKDAASLESQQLQDTQELLQEETR                    | 2751.9             | 3            | 5.5295 | 0.3922 |
| FAKDAASLESQQLQDTQELLQEETRQK                  | 3008.2             | 3            | 4.7603 | 0.2785 |
| FALGIFAINEAVESGDVGK                          | 1938.2             | 2            | 5.8047 | 0.4766 |
| FALGIFAINEAVESGDVGKTLALSALR                  | 2579.9             | 3            | 3.543  | 0.2304 |
| FALGLSGGSLVSMLAR                             | 1579.9             | 2            | 2.9925 | 0.2296 |
| FALKEEDISR                                   | 1208.3             | 2            | 3.0944 | 0.2875 |

| Peptide Sequence                   | Peptide mass (m/z) | Charge State | Xcorr  | DelCn2 |
|------------------------------------|--------------------|--------------|--------|--------|
| FALPSPQHILGLPVGQHIYLSAR            | 2515.9             | 3            | 6.1495 | 0.492  |
| FALPTAHHTLGLPVGK                   | 1660.0             | 2            | 4.0389 | 0.403  |
| FALQLGDPSTGLLIR                    | 1601.9             | 2            | 3.5914 | 0.1061 |
| FALVPKLVKEEVFWRNYFYRVSLIK          | 3146.8             | 3            | 3.3802 | 0.1962 |
| FAMEPEEFSDTLR                      | 1687.8             | 2            | 3.8891 | 0.3244 |
| FAMEPEEFSDTLREFVTAFK               | 2510.8             | 2            | 3.9678 | 0.4174 |
| FAMEPEEFSDTLREFVTAFKK              | 2638.9             | 3            | 3.3605 | 0.2168 |
| FAMVAPDVQIEDGKGITILISSEEGETEANNHKK | 3559.9             | 3            | 4.9326 | 0.4274 |
| FANLNEQAAR                         | 1134.2             | 2            | 3.1073 | 0.1714 |
| FANPFPAAVR                         | 1090.3             | 2            | 2.4249 | 0.1066 |
| FANSEVEVK                          | 1023.1             | 2            | 2.6739 | 0.2157 |
| FANSLPINDPLQTVYQLMSGR              | 2365.7             | 2            | 4.1014 | 0.4429 |
| FANSLVGVQQQLQAFNTYR                | 2185.4             | 3            | 4.8288 | 0.2908 |
| FANYIDKVR                          | 1126.3             | 2            | 3.2765 | 0.3306 |
| FAPAIMQALK                         | 1090.4             | 2            | 3.0713 | 0.1857 |
| FAPKGPEEDHKA                       | 1326.4             | 2            | 2.6885 | 0.1917 |
| FAPNHTKELEDKVIELHK                 | 2149.4             | 2            | 3.0984 | 0.3603 |
| FAPPLVIKEDELK                      | 1527.8             | 2            | 3.3997 | 0.3659 |
| FAPVVAPKPK                         | 1054.3             | 2            | 2.5074 | 0.1898 |
| FAQENELMFLETSALTGENVEEAFLK         | 2962.3             | 3            | 3.863  | 0.1387 |
| FAQEQIAPLVSTMDENSK                 | 2009.2             | 2            | 4.6182 | 0.2363 |
| FAQHGTFEYEYSQR                     | 1763.8             | 2            | 4.9415 | 0.4758 |
| FAQPGSFEYAYMR                      | 1696.9             | 2            | 4.7153 | 0.5064 |
| FAQPGTFEYAYSR                      | 1650.8             | 2            | 3.6992 | 0.3352 |
| FAQQHQR                            | 986.1              | 2            | 2.6275 | 0.1982 |
| FAQQITGMR                          | 1052.2             | 2            | 3.145  | 0.2551 |
| FAQVSDPTVGVDFFSR                   | 1772.9             | 2            | 3.8619 | 0.1904 |
| FAREEIIPVAAEYDKTGEYVPLIR           | 2878.3             | 3            | 6.1573 | 0.4597 |
| FASEIAGVDDLGTGR                    | 1609.7             | 2            | 5.2523 | 0.4472 |
| FASFEAQGALANIAVDK                  | 1752.9             | 2            | 3.9441 | 0.268  |
| FASFEAQGALANIAVDKANLEIMTK          | 2654.0             | 3            | 4.0112 | 0.2262 |
| FASFIDKVR                          | 1083.3             | 2            | 3.5113 | 0.1579 |
| FASFPDYLVIIK                       | 1541.8             | 2            | 3.2809 | 0.3752 |
| FASFPDYLVIIKK                      | 1670.0             | 2            | 3.0636 | 0.1473 |
| FASYLTFSPSEVK                      | 1476.7             | 2            | 4.4241 | 0.4412 |
| FATEAAITLR                         | 1206.4             | 2            | 3.4562 | 0.368  |

| Peptide Sequence               | Peptide mass (m/z) | Charge State | Xcorr  | DelCn2 |
|--------------------------------|--------------------|--------------|--------|--------|
| FATHAAALSVR                    | 1144.3             | 2            | 3.271  | 0.4692 |
| FATLQNELQSSSLDAQKESTGVTTLR     | 2739.0             | 3            | 4.3274 | 0.3608 |
| FATSLVDNSVPLLR                 | 1532.8             | 2            | 3.8695 | 0.417  |
| FATVEVTDKPVDEALR               | 1791.0             | 2            | 4.346  | 0.4184 |
| FAVEEIIQKQVK                   | 1432.7             | 2            | 3.1318 | 0.2346 |
| FAVGIVIGR                      | 932.1              | 2            | 2.5742 | 0.1131 |
| FAYGYIEDLK                     | 1219.4             | 2            | 3.2355 | 0.3137 |
| FCDVKDETYDLLYQQCDAQPGASGSGVYVR | 3329.6             | 3            | 3.8158 | 0.2627 |
| FDADEKGYIEEK                   | 1444.5             | 2            | 3.755  | 0.3573 |
| FDADEKGYIEEKELDAFFLHMLMK       | 2921.3             | 3            | 6.6574 | 0.5265 |
| FDAGELITQR                     | 1150.3             | 2            | 3.8001 | 0.2755 |
| FDAMPFTLR                      | 1098.3             | 2            | 3.1991 | 0.2172 |
| FDAQTGADR                      | 981.0              | 2            | 2.9298 | 0.2852 |
| FDASFFGVHPK                    | 1252.4             | 3            | 3.2737 | 0.3401 |
| FDATQAFVGEISQFNIVDR            | 2245.4             | 2            | 4.6772 | 0.4128 |
| FDCSSAPDICSNLYVFQPSLAVFK       | 2653.0             | 3            | 4.3068 | 0.2189 |
| FDDAVVQSDMK                    | 1255.4             | 2            | 3.931  | 0.3601 |
| FDDAVVQSDMKHWPFMVNDAGRPK       | 2891.3             | 3            | 4.924  | 0.3804 |
| FDDGAGGDNEVQR                  | 1380.4             | 2            | 4.2583 | 0.4277 |
| FDDPGLMLMGFKPLVLLKK            | 2163.7             | 3            | 3.5967 | 0.2732 |
| FDDPLLGPR                      | 1030.2             | 2            | 2.5519 | 0.3246 |
| FDEAALSIQKEK                   | 1379.5             | 2            | 3.2717 | 0.2281 |
| FDEATQLR                       | 980.1              | 2            | 2.7708 | 0.1707 |
| FDEGRADFPVDEELGLDLGDLR         | 2566.7             | 3            | 4.2223 | 0.2476 |
| FDEHQSKPEILNLVK                | 1798.0             | 2            | 3.565  | 0.2553 |
| FDEHQSKPEILNLVKR               | 1954.2             | 3            | 3.4284 | 0.2377 |
| FDEILEASDGIMVAR                | 1666.9             | 2            | 3.9654 | 0.2346 |
| FDESEKTKESR                    | 1356.4             | 2            | 3.1437 | 0.2563 |
| FDGALNVDLTFEQTNLVPYPR          | 2410.7             | 2            | 5.8172 | 0.4712 |
| FDGATEVEPR                     | 1121.2             | 2            | 3.0747 | 0.2099 |
| FDGGEEVLISGEFNDRK              | 2026.2             | 3            | 3.7991 | 0.2753 |
| FDGGVEAIATR                    | 1136.2             | 2            | 3.4599 | 0.3827 |
| FDGILGMAYPR                    | 1240.5             | 2            | 3.9973 | 0.5046 |
| FDGWKVVFNLTQGGK                | 1812.0             | 2            | 4.3453 | 0.3599 |
| FDHIFTGNTAVGK                  | 1570.7             | 2            | 3.446  | 0.3223 |
| FDHLVAIER                      | 1100.3             | 2            | 2.8854 | 0.2247 |

| Peptide Sequence              | Peptide mass (m/z) | Charge State | Xcorr  | DelCn2 |
|-------------------------------|--------------------|--------------|--------|--------|
| FDIEMSMRGDIFER                | 1747.0             | 2            | 3.1421 | 0.1291 |
| FDKDHDVMLFLK                  | 1508.8             | 3            | 4.6256 | 0.2406 |
| FDKKDEESGGGSNPFQHLEK          | 2250.4             | 3            | 5.4721 | 0.4093 |
| FDKKDEESGSGSNPFQHLEK          | 2280.4             | 3            | 4.2464 | 0.3296 |
| FDKKDEESGSGSNPFQHLEKSAVLQEAR  | 3135.3             | 3            | 3.8599 | 0.1356 |
| FDKLSHASSGAGH                 | 1314.4             | 2            | 3.1911 | 0.3252 |
| FDKRSEAEAAITSFNGHKPPGSSEPITVK | 3160.4             | 3            | 3.9389 | 0.327  |
| FDLEKYNQLKDAIAQAEMDLKR        | 2641.0             | 3            | 4.3753 | 0.25   |
| FDLGQDVIDFTGHALALYR           | 2152.4             | 2            | 6.0307 | 0.544  |
| FDLLASNFPLPGSSSR              | 1806.0             | 2            | 2.878  | 0.1023 |
| FDLPDMKETK                    | 1224.4             | 2            | 2.8392 | 0.2138 |
| FDNSYLLR                      | 1115.2             | 2            | 2.8425 | 0.316  |
| FDNTYSFIHAK                   | 1343.5             | 2            | 3.326  | 0.2894 |
| FDPTWESLDAR                   | 1337.4             | 2            | 2.8005 | 0.2571 |
| FDPVGPLPGNPILPGR              | 1744.0             | 2            | 3.0972 | 0.318  |
| FDPYEHEALFHTPVEGK             | 2017.2             | 3            | 3.6164 | 0.1925 |
| FDPYEHEALFHTPVEGKEPGTVALVSK   | 2999.3             | 3            | 5.6338 | 0.3923 |
| FDQGDTR                       | 939.9              | 2            | 2.4808 | 0.1553 |
| FDQKQELGR                     | 1121.2             | 2            | 2.9558 | 0.1431 |
| FDQLFDDESDPFEVLK              | 1945.1             | 2            | 5.5144 | 0.4585 |
| FDQLLAEEK                     | 1093.2             | 2            | 2.8346 | 0.1995 |
| FDQLLAEEKTISAK                | 1593.8             | 2            | 4.265  | 0.3437 |
| FDREVDIGIPDATGR               | 1661.8             | 2            | 3.18   | 0.2274 |
| FDRGYISPYFINTSK               | 1809.0             | 3            | 4.1754 | 0.3734 |
| FDSASSSYLDMHSLPHVINPVESR      | 2853.1             | 3            | 3.835  | 0.2942 |
| FSDAASPR                      | 966.0              | 2            | 3.2305 | 0.3595 |
| FSDAASQR                      | 997.0              | 2            | 3.1221 | 0.2149 |
| FSDVGEYR                      | 1088.1             | 2            | 2.8982 | 0.255  |
| FSDVGVYR                      | 1058.1             | 2            | 2.8356 | 0.3904 |
| FDSKDEILLTLEK                 | 1551.8             | 2            | 3.7622 | 0.3239 |
| FDSNNVVLIEDNGNPVGTR           | 2061.2             | 2            | 5.5817 | 0.4277 |
| FDTEEEFKKR                    | 1329.4             | 2            | 2.6757 | 0.1938 |
| FDTGNLCMVTGGANLGR             | 1727.0             | 2            | 2.526  | 0.1012 |
| FDTQYPYGEK                    | 1248.3             | 2            | 2.9993 | 0.1619 |
| FDTQYPYGEKQDEFKR              | 2052.2             | 2            | 3.8496 | 0.4484 |
| FDVNTSAVQVLIHIGNLDR           | 2241.5             | 2            | 3.0022 | 0.2343 |



| Peptide Sequence                      | Peptide mass (m/z) | Charge State | Xcorr  | DelCn2 |
|---------------------------------------|--------------------|--------------|--------|--------|
| FDVPGDENAEMDAR                        | 1566.6             | 2            | 3.2592 | 0.2933 |
| FDVQLKDLEK                            | 1235.4             | 2            | 3.2887 | 0.1923 |
| FDVQLKDLEKWQNNLLPSR                   | 2344.7             | 3            | 5.6876 | 0.3667 |
| FDVSGYPTIK                            | 1127.3             | 2            | 3.2452 | 0.35   |
| FDVSGYPTLK                            | 1127.3             | 2            | 2.8588 | 0.2561 |
| FDYSGVGSDDGNSEESTLGK                  | 2037.0             | 2            | 4.9286 | 0.4567 |
| FEAPEALFQPHLINVEGVGVAELLFNTIQAADIDTR  | 3940.4             | 3            | 6.7243 | 0.4633 |
| FEAPLFNAR                             | 1065.2             | 2            | 2.4199 | 0.206  |
| FEDENFILK                             | 1155.3             | 2            | 3.1727 | 0.1356 |
| FEDHEGLPTVVK                          | 1371.5             | 2            | 2.932  | 0.2313 |
| FEDKTVAYTEQK                          | 1459.6             | 2            | 4.4593 | 0.3089 |
| FEDPKFEVIEKPQA                        | 1677.9             | 2            | 4.3449 | 0.3764 |
| FEELNADLFR                            | 1254.4             | 2            | 3.3034 | 0.2612 |
| FEELNADLFRGTLDPVEK                    | 2094.3             | 2            | 3.062  | 0.1159 |
| FEELNMDLFR                            | 1314.5             | 2            | 3.5353 | 0.2768 |
| FEELTNLIR                             | 1135.3             | 2            | 2.5165 | 0.1433 |
| FEGGDRDLEHLSK                         | 1503.6             | 2            | 2.8638 | 0.1816 |
| FEGGDRDLEHLSKFIEEHATK                 | 2459.7             | 3            | 3.4201 | 0.1541 |
| FEGKPLLQR                             | 1088.3             | 2            | 2.525  | 0.133  |
| FEHCNFDVTTR                           | 1483.6             | 2            | 2.9354 | 0.2216 |
| FEIGEGENLDLPYGLER                     | 1952.1             | 2            | 4.9101 | 0.4195 |
| FEKEAAEMGK                            | 1140.3             | 2            | 2.9966 | 0.2034 |
| FEKNFYVEHPEVAR                        | 1765.9             | 2            | 4.3534 | 0.4058 |
| FELGKLMELHGEGSSSGK                    | 1907.1             | 2            | 3.921  | 0.3646 |
| FELGKLMELHGEGSSSGKATGDETGAKVER        | 3122.4             | 3            | 3.6573 | 0.3741 |
| FENAFLSHVVSQHQALLGTIR                 | 2368.7             | 3            | 6.1528 | 0.5412 |
| FENAFLSHVVSQHQALLGTIRADGK             | 2740.1             | 3            | 5.9466 | 0.42   |
| FENIHNTNPKPGLLGEPPAVVLQ TALGIGSVLPLKK | 3667.3             | 3            | 4.4156 | 0.3322 |
| FEQIYLSKPTHWER                        | 1835.1             | 2            | 2.5134 | 0.1393 |
| FEREQLLGVQQHLSNTLK                    | 2141.4             | 3            | 5.2232 | 0.3621 |
| FESDPATHNEPGVR                        | 1556.6             | 2            | 3.4136 | 0.3588 |
| FETEKNNGAGYFLEHLAFK                   | 2216.4             | 3            | 5.1337 | 0.4619 |
| FETEKNNGAGYFLEHLAFKGTK                | 2502.8             | 3            | 4.4547 | 0.3981 |
| FETFCLDPSLVTK                         | 1500.7             | 2            | 3.4021 | 0.2329 |
| FETLQAQAGK                            | 1093.2             | 2            | 3.273  | 0.3613 |
| FETLQAQAGKHGDDLRL                     | 1786.9             | 2            | 3.9482 | 0.3104 |

| Peptide Sequence         | Peptide mass (m/z) | Charge State | Xcorr  | DelCn2 |
|--------------------------|--------------------|--------------|--------|--------|
| FEWELPLDEAQR             | 1533.7             | 2            | 3.5803 | 0.3777 |
| FFALPYVDHFLR             | 1525.8             | 2            | 3.1457 | 0.244  |
| FFDANYDGKDYDPVAAR        | 1965.1             | 2            | 4.8432 | 0.4163 |
| FFDANYDGKDYNPLLAR        | 2020.2             | 2            | 4.1651 | 0.3435 |
| FFDDPMLLELAK             | 1439.7             | 2            | 2.8191 | 0.3266 |
| FFDEESYSLLR              | 1406.5             | 2            | 3.8672 | 0.4159 |
| FFDEESYSLLRK             | 1534.7             | 2            | 3.3859 | 0.2952 |
| FFDENESPVDPQHGSK         | 1833.9             | 2            | 4.1704 | 0.3833 |
| FFDHSGTLVMDAYEPEISR      | 2215.4             | 2            | 6.3225 | 0.537  |
| FFDKVIEKR                | 1182.4             | 2            | 2.7206 | 0.2673 |
| FFEDYGLFMR               | 1325.5             | 2            | 2.7063 | 0.2382 |
| FFEEPEDPSSR              | 1340.4             | 2            | 3.1097 | 0.2668 |
| FFEHFIEGGR               | 1239.4             | 2            | 3.162  | 0.3538 |
| FFESFGDLSTPDAVMGNPK      | 2060.3             | 2            | 5.0469 | 0.526  |
| FFEVLIDPFHK              | 1505.8             | 2            | 3.5335 | 0.3029 |
| FFFDVGSNK                | 1061.2             | 2            | 2.4235 | 0.2064 |
| FFFDVGSNKYGVFMR          | 1815.1             | 2            | 3.6309 | 0.4617 |
| FFGDSAASMAIK             | 1245.4             | 2            | 2.9626 | 0.2754 |
| FFGDSAASMAIKNPK          | 1584.8             | 2            | 4.143  | 0.4361 |
| FFGKDISTTLNADEAVAR       | 1956.1             | 2            | 5.3195 | 0.5377 |
| FFGKELSTTLNADEAVTR       | 2000.2             | 2            | 5.4655 | 0.4979 |
| FFGNSWAETYR              | 1378.5             | 2            | 2.775  | 0.3488 |
| FFGPNAEISQPPALSQLVNLYLGR | 2633.0             | 3            | 3.2389 | 0.1789 |
| FFGTFFPGNYVK             | 1277.5             | 2            | 3.1581 | 0.3383 |
| FFHETEAPRPK              | 1359.5             | 2            | 3.4012 | 0.3537 |
| FFHETEAPRPKDFLSK         | 1950.2             | 2            | 3.9756 | 0.3543 |
| FFHLAFEEEFGR             | 1529.7             | 2            | 2.8476 | 0.1568 |
| FFHPEEWADLFQAAGAK        | 1965.2             | 3            | 4.8577 | 0.3552 |
| FFLKDISTTLNADEAVAR       | 2012.3             | 2            | 2.4161 | 0.1327 |
| FFLQDPQSQELDVQVK         | 1922.1             | 3            | 4.6127 | 0.3437 |
| FFLQDPQSQELDVQVKDDSR     | 2395.6             | 3            | 3.9072 | 0.2539 |
| FFLQGIQLNTILPDAR         | 1847.2             | 2            | 3.2372 | 0.1358 |
| FFLQGIQLNTILPDARDPAFK    | 2405.8             | 3            | 4.8692 | 0.1947 |
| FFLSHPAYR                | 1138.3             | 2            | 2.6831 | 0.2763 |
| FFLSHPSYR                | 1154.3             | 2            | 2.4124 | 0.2667 |
| FFLSSGLIDKVDNFK          | 1731.0             | 2            | 4.2023 | 0.2865 |

| Peptide Sequence                     | Peptide mass (m/z) | Charge State | Xcorr  | DelCn2 |
|--------------------------------------|--------------------|--------------|--------|--------|
| FFNIPFLQLQR                          | 1423.7             | 2            | 3.6668 | 0.3291 |
| FFNLNKLEDSR                          | 1383.5             | 2            | 3.6629 | 0.2903 |
| FFPASADRTVIDYNGER                    | 1959.1             | 2            | 3.2413 | 0.1736 |
| FFPFGLVQLSSDLSK                      | 1685.9             | 2            | 4.9745 | 0.4903 |
| FFPFGLVQLSSDLSKK                     | 1814.1             | 2            | 2.6358 | 0.2812 |
| FFPLESWQIGK                          | 1352.6             | 2            | 3.1842 | 0.3643 |
| FFPYVYVNIIGGLDEEGK                   | 2125.4             | 2            | 2.8368 | 0.2499 |
| FFQKEQALSTLQLEHTSTQALVSELLPAK        | 3259.7             | 3            | 5.1218 | 0.4496 |
| FFQPTEMAAQDFFQR                      | 1864.1             | 2            | 3.6962 | 0.4116 |
| FFQPTEMASQDFFQR                      | 1880.1             | 2            | 2.9832 | 0.3532 |
| FFQSFSDALIDEDPQAAL EELTK             | 2615.8             | 2            | 5.5786 | 0.37   |
| FFREVLLEVQK                          | 1408.7             | 3            | 3.4402 | 0.1477 |
| FFRPHFLQAPGD LTVQEGK                 | 2188.5             | 3            | 5.5499 | 0.4128 |
| FFSDKETFHDIAQVASEFFPGAQHYVGGNAALIGQK | 3782.1             | 3            | 5.9764 | 0.4396 |
| FFTDDL FQYAGEK                       | 1581.7             | 2            | 3.4509 | 0.3698 |
| FFTEEVD SR                           | 1130.2             | 2            | 2.8391 | 0.3992 |
| FFTGQIT AAGK                         | 1141.3             | 2            | 2.4545 | 0.2254 |
| FFTNFESR                             | 1048.1             | 2            | 2.57   | 0.311  |
| FFTREPQDTYHYLPFSLPHR                 | 2552.8             | 3            | 4.8501 | 0.444  |
| FFTVKLPVALDPGAK                      | 1603.9             | 2            | 4.5217 | 0.4162 |
| FFTYGNFPLEQHLK                       | 1742.0             | 2            | 3.4993 | 0.295  |
| FFVADTANEALEAAK                      | 1597.8             | 2            | 5.1562 | 0.5058 |
| FFVADTANEALEAAKR                     | 1753.9             | 2            | 5.4581 | 0.5472 |
| FFVNFVVGQDPGSDVAFHFNPR               | 2497.8             | 3            | 4.1399 | 0.2749 |
| FFVSSSQGR                            | 1015.1             | 2            | 2.9353 | 0.3696 |
| FFVTTLPAFFHAK                        | 1526.8             | 2            | 3.9738 | 0.3588 |
| FFWGNAETLKHEPR                       | 1732.9             | 2            | 2.4847 | 0.222  |
| FFYSDQNVDSRDPVQLNLLYVQAR             | 2889.2             | 3            | 5.5793 | 0.3532 |
| FGAFHSPALEDADFDGKPMVLVAGQYSTGK       | 3157.5             | 3            | 5.373  | 0.3379 |
| FGALTAEK                             | 837.0              | 2            | 2.6192 | 0.1115 |
| FGANAILGVSLAVCK                      | 1463.8             | 2            | 3.8722 | 0.3918 |
| FGAPPHAGGGIGLER                      | 1436.6             | 2            | 3.6019 | 0.4068 |
| FGAQLAHIQALISGIEAQLGDVR              | 2408.7             | 2            | 6.7829 | 0.5386 |
| FGAQLAHIQALISGIEAQLGDVRADSER         | 2967.3             | 3            | 4.9608 | 0.4838 |
| FGAQLAHIQALISGIEAQLGDVRADSERQNQEYQR  | 3914.3             | 3            | 4.2804 | 0.2187 |
| FGAQNEEMLPSILVLLK                    | 1903.3             | 2            | 4.7896 | 0.2251 |

| Peptide Sequence             | Peptide mass (m/z) | Charge State | Xcorr  | DelCn2 |
|------------------------------|--------------------|--------------|--------|--------|
| FGAQNEEMLPSILVLLKR           | 2059.5             | 3            | 5.1077 | 0.349  |
| FGAQNESLLPSILVLLQR           | 1999.3             | 2            | 4.5431 | 0.3216 |
| FGDPVVQSDMK                  | 1223.4             | 2            | 3.0765 | 0.4084 |
| FGDPVVQSDMKHWPFQVINDGDKPK    | 2886.2             | 3            | 5.1235 | 0.2898 |
| FGDQLLQIDGR                  | 1262.4             | 2            | 3.9659 | 0.2693 |
| FGDRFPAMSDAYDR               | 1648.8             | 2            | 3.3105 | 0.3073 |
| FGDSNTVMR                    | 1027.1             | 2            | 2.5623 | 0.2137 |
| FGDYNKEVHK                   | 1237.3             | 2            | 2.9658 | 0.2292 |
| FGDYNKEVHKSGYLSSER           | 2117.3             | 2            | 4.1762 | 0.4497 |
| FGEGVSSPK                    | 908.0              | 2            | 3.4965 | 0.2933 |
| FGEGVSSPKTHLGEALAPLSK        | 2126.4             | 3            | 4.2899 | 0.3161 |
| FGELVMTK                     | 925.1              | 2            | 2.8306 | 0.1115 |
| FGELVMTKESK                  | 1269.5             | 2            | 2.4761 | 0.2174 |
| FGEMQLDFR                    | 1143.3             | 2            | 2.7218 | 0.2255 |
| FGESTTGFNFSFK                | 1469.6             | 2            | 3.3063 | 0.3497 |
| FGEVVDCTIK                   | 1111.3             | 2            | 2.6648 | 0.201  |
| FGEVVDCTLKLDIPITGR           | 1864.2             | 3            | 4.5279 | 0.3741 |
| FGFGLLNAK                    | 967.1              | 2            | 3.3684 | 0.2755 |
| FGFPEGSVELYAEK               | 1573.7             | 2            | 3.2207 | 0.4113 |
| FGGAAVFPNQEQR                | 1492.6             | 2            | 3.5726 | 0.1777 |
| FGGALDAAAK                   | 921.0              | 2            | 3.0969 | 0.2293 |
| FGGEHVPNSPFQVTALAGDQPSVQPPLR | 2947.3             | 3            | 4.5077 | 0.4024 |
| FGGGNPELLTQMVSK              | 1578.8             | 2            | 4.812  | 0.3948 |
| FGGGNPELLTQMVSKGFLGR         | 2109.4             | 2            | 3.6723 | 0.378  |
| FGGNPGGFGNQGGFGNSR           | 1727.8             | 2            | 4.425  | 0.4027 |
| FGGPVHHQAQR                  | 1234.4             | 2            | 3.178  | 0.2264 |
| FGSGSQVDSAR                  | 1168.2             | 2            | 3.8582 | 0.3664 |
| FGHEFLEFEFRPDGK              | 1856.0             | 2            | 4.2318 | 0.396  |
| FGHGSDYSR                    | 1026.0             | 2            | 2.7855 | 0.3016 |
| FGIDDQDYLVSLTR               | 1642.8             | 2            | 4.7036 | 0.4314 |
| FGIDDQDYQNSVTR               | 1658.7             | 2            | 4.3327 | 0.4587 |
| FGIEKEVR                     | 978.1              | 2            | 2.6993 | 0.1702 |
| FGISSVPTK                    | 936.1              | 2            | 2.4528 | 0.1041 |
| FGIVTSSAGTGTTEDTEAK          | 1873.0             | 2            | 5.4834 | 0.5038 |
| FGKHGGTIPIVPTAEFQDR          | 2071.3             | 2            | 4.4005 | 0.4197 |
| FGKPDPIVSVIFKDEK             | 1820.1             | 3            | 4.3212 | 0.3243 |

| Peptide Sequence                         | Peptide mass (m/z) | Charge State | Xcorr  | DelCn2 |
|------------------------------------------|--------------------|--------------|--------|--------|
| FGLALAVAGGVVNSALYNVDAGHR                 | 2372.7             | 2            | 5.4845 | 0.4491 |
| FGLGSVAGAVGATAVYPIDLVK                   | 2106.5             | 2            | 6.2662 | 0.5304 |
| FGLLEDEDGKKTFFR                          | 1673.9             | 2            | 2.5584 | 0.2258 |
| FGLNIDR                                  | 834.9              | 2            | 2.7079 | 0.15   |
| FGLNVSSISR                               | 1080.2             | 2            | 3.2539 | 0.3333 |
| FGLSVGHHLGK                              | 1152.3             | 2            | 3.321  | 0.2662 |
| FGLYLPLFKPSVSTSK                         | 1785.1             | 2            | 4.2291 | 0.3668 |
| FGMAAALAGTMR                             | 1197.5             | 2            | 3.5533 | 0.3753 |
| FGMDFKEIELIGSGGFGQVFK                    | 2307.7             | 2            | 2.9787 | 0.2027 |
| FGMFEFLSNHMR                             | 1516.8             | 3            | 3.3809 | 0.3963 |
| FGMLDATDGPGETEDAALR                      | 1838.0             | 2            | 3.0817 | 0.2584 |
| FGNAFLNR                                 | 939.1              | 2            | 2.6487 | 0.3006 |
| FGNEVIPVTVTVK                            | 1403.6             | 2            | 3.6501 | 0.2853 |
| FGNPLLVDVESYDPVLNPVLNR                   | 2599.9             | 2            | 6.1116 | 0.5366 |
| FGNQADHFLGSLAFK                          | 1723.9             | 3            | 4.1192 | 0.4054 |
| FGPGVAFR                                 | 851.0              | 2            | 2.576  | 0.3093 |
| FGPIPLGSLGWK                             | 1272.5             | 2            | 2.8413 | 0.2084 |
| FGPVVAPKPK                               | 1040.3             | 2            | 2.4681 | 0.1179 |
| FGPYESYDSR                               | 1221.3             | 2            | 2.5832 | 0.1988 |
| FGPYYTEPVIAGLDPK                         | 1768.0             | 2            | 3.7586 | 0.3103 |
| FGQAATMEGIGAIGGTPPAFNR                   | 2164.4             | 2            | 5.9985 | 0.5484 |
| FGQDFSTFLEAGVEMAGQAPSQEDR                | 2718.9             | 3            | 3.8432 | 0.1486 |
| FGQGDLPKPINSDFR                          | 1691.9             | 3            | 3.2869 | 0.3206 |
| FGQGGAGPVGGQGPR                          | 1342.4             | 2            | 4.3754 | 0.4397 |
| FGQHLLKPSVVFLK                           | 1614.0             | 2            | 2.7671 | 0.1338 |
| FGQMLGSNMTEFHQSISK                       | 2043.3             | 3            | 3.2876 | 0.2463 |
| FGQVPDQPAGLR                             | 1285.4             | 2            | 2.688  | 0.1155 |
| FGQVTPMEVDILFQLADLYEPR                   | 2583.0             | 3            | 3.3176 | 0.174  |
| FGRFDREVDIGIPDATGRLEILQIHTK              | 3098.5             | 3            | 4.0747 | 0.1712 |
| FGSAIAPLGDLDQDGFNDIAIAAPYGGEDKKGIVYIFNGR | 4187.6             | 3            | 4.2444 | 0.3992 |
| FGSDHTGVGR                               | 1033.1             | 2            | 2.4308 | 0.2516 |
| FGSGMNMGR                                | 957.1              | 2            | 2.7376 | 0.2593 |
| FGSLLPIHPVTSG                            | 1325.5             | 2            | 2.991  | 0.1933 |
| FGTVLTEHVAAAELGAR                        | 1743.0             | 2            | 4.9217 | 0.4368 |
| FGVAPDHPEVK                              | 1196.3             | 2            | 3.216  | 0.2674 |
| FGVAPDHPEVKNVINTFTQTAHSGR                | 2724.0             | 3            | 4.4364 | 0.4205 |

| Peptide Sequence               | Peptide mass (m/z) | Charge State | Xcorr  | DelCn2 |
|--------------------------------|--------------------|--------------|--------|--------|
| FGVEQDRMDK                     | 1225.4             | 2            | 2.8886 | 0.2826 |
| FGVEQDRMDKSAVGHEYQSK           | 2312.5             | 3            | 5.6015 | 0.3286 |
| FGVEQDVDMVFASFIR               | 1861.1             | 2            | 5.877  | 0.5649 |
| FGVEQDVDMVFASFIRK              | 1989.3             | 3            | 5.5108 | 0.4855 |
| FGVQMDRVDQSAVGFEYQGKTEK        | 2620.9             | 3            | 4.0658 | 0.2046 |
| FGVQTDRQDK                     | 1194.3             | 2            | 2.756  | 0.1897 |
| FGVVLDEIKPSSAPELQAVR           | 2156.5             | 2            | 4.9248 | 0.3154 |
| FGVVVVGVGR                     | 989.2              | 2            | 3.7906 | 0.3111 |
| FGYDEIDNGYLK                   | 1434.5             | 2            | 3.8375 | 0.3178 |
| FGYHFTQQGPR                    | 1338.5             | 2            | 3.2253 | 0.3581 |
| FGYRLPAEGLK                    | 1251.5             | 3            | 3.6513 | 0.3398 |
| FGYVDFESAEDLEK                 | 1649.7             | 2            | 3.9367 | 0.373  |
| FGYVDFESAEDLEKALELTGLK         | 2475.7             | 2            | 4.5734 | 0.4447 |
| FGYVDFESAEDLEKALELTGLKVFGEIK   | 3263.6             | 3            | 3.3845 | 0.1688 |
| FHALGPIYYR                     | 1237.4             | 2            | 2.6406 | 0.154  |
| FHCVGGSVQDPEKIPSTGK            | 1987.2             | 2            | 5.4399 | 0.308  |
| FHDFLGDSWGILFSHR               | 2032.2             | 3            | 5.4827 | 0.5147 |
| FHDIDDVKK                      | 1117.2             | 2            | 2.8603 | 0.147  |
| FHDIISDAEIEIVKDLAKPR           | 2310.6             | 2            | 3.7529 | 0.1896 |
| FHDKRDAEDAMDAMDGAVLDGR         | 2436.6             | 3            | 4.9339 | 0.4185 |
| FHDLLSQLDDQYSR                 | 1737.9             | 2            | 4.8314 | 0.3843 |
| FHDLRPDEVADLFQTTQR             | 2189.4             | 3            | 4.2596 | 0.2859 |
| FHDNFGFDDLVR                   | 1482.6             | 2            | 2.6904 | 0.2174 |
| FHDPDSAVVAQHLTNTVFVDR          | 2369.6             | 3            | 5.822  | 0.488  |
| FHEERKTKLSLLLDNERWKQADVPA      | 3025.4             | 2            | 4.508  | 0.1299 |
| FHEFHSPALEDADFDNKPMVLLVGQYSTGK | 3394.8             | 3            | 5.6068 | 0.4735 |
| FHEFHSPALEDADFENKPMILLVGQYSTGK | 3422.8             | 3            | 7.0336 | 0.4184 |
| FHEQFHSLR                      | 1201.3             | 2            | 3.0671 | 0.1813 |
| FHFASALKR                      | 1077.3             | 2            | 2.6053 | 0.1758 |
| FHFTHTIQQK                     | 1287.5             | 2            | 2.8929 | 0.1639 |
| FHFVDLAGSER                    | 1278.4             | 2            | 2.9524 | 0.2898 |
| FHGGNLFFLPGGAR                 | 1490.7             | 2            | 3.3235 | 0.3466 |
| FHHTFSTEIAK                    | 1318.5             | 2            | 2.9663 | 0.309  |
| FHLATAEWIAEPVR                 | 1640.9             | 2            | 3.7646 | 0.3125 |
| FHMDSETHPIDLQTK                | 1915.1             | 3            | 3.6216 | 0.3611 |
| FHMVDGNVSGEFTDLVPEK            | 2122.3             | 2            | 2.6427 | 0.2282 |

| Peptide Sequence                    | Peptide mass (m/z) | Charge State | Xcorr  | DelCn2 |
|-------------------------------------|--------------------|--------------|--------|--------|
| FHNELNAHIK                          | 1223.4             | 2            | 2.5475 | 0.1098 |
| FHNLEGFLEEFADIAKEDQIKK              | 2622.9             | 3            | 3.4919 | 0.1509 |
| FHPDTDDVPVPAPAGDQKEVDTSEK           | 2695.8             | 3            | 5.0665 | 0.4091 |
| FHPDTDDVPVPAPAGDQKEVDTSEKK          | 2824.0             | 3            | 4.6404 | 0.4039 |
| FHPEPYGLEDDQR                       | 1603.7             | 3            | 3.4912 | 0.3127 |
| FHPIKETVVEEPVDITPYLDQLDESLRDK       | 3427.8             | 3            | 5.3518 | 0.2938 |
| FHQLDIDDLQSIR                       | 1600.8             | 3            | 4.4427 | 0.3222 |
| FHQLLDESDFDILR                      | 1961.1             | 2            | 4.1802 | 0.3844 |
| FHQNQLLSSLKGEPAPALSSR               | 2281.6             | 3            | 3.9067 | 0.2438 |
| FHSEDYIDFLQR                        | 1570.7             | 2            | 2.7452 | 0.2309 |
| FHSFPNVYHELK                        | 1605.8             | 3            | 3.2756 | 0.2632 |
| FHSGWEPPVDVLQEAPWEVEGLASAPIEEVSPVSR | 3846.2             | 3            | 5.0029 | 0.4454 |
| FHSPQHPPPEEFGFGFSFSPGGGIR           | 2619.8             | 3            | 4.4768 | 0.2716 |
| FHTSRPESFAIYK                       | 1583.8             | 2            | 2.5071 | 0.1044 |
| FHTVSGSK                            | 863.0              | 1            | 2.301  | 0.2068 |
| FHVEEEGK                            | 975.0              | 1            | 2.8606 | 0.1487 |
| FHVEEEGKGDASGNK                     | 1732.8             | 2            | 5.631  | 0.4164 |
| FHVEEEGKGDASGNKVK                   | 1960.1             | 2            | 5.7718 | 0.4822 |
| FHYKTDQGIK                          | 1237.4             | 2            | 2.6464 | 0.1491 |
| FIADQLDHLNVTK                       | 1514.7             | 2            | 4.3461 | 0.3443 |
| FIADQLDHLNVTKK                      | 1642.9             | 2            | 2.8496 | 0.1347 |
| FIAEEAAASGAK                        | 1165.3             | 2            | 3.2299 | 0.1951 |
| FIAVGYYDDTQFVR                      | 1630.8             | 2            | 5.2177 | 0.464  |
| FIAVGYYDDTQFVRFSDAASPR              | 2577.8             | 3            | 4.3419 | 0.3173 |
| FIAVGYYDDTQFVRFSDAASQR              | 2608.8             | 3            | 3.5397 | 0.3361 |
| FICTTSAIQNR                         | 1254.4             | 2            | 3.3688 | 0.3586 |
| FIDFFK                              | 817.0              | 2            | 2.4237 | 0.1597 |
| FIDTTSK                             | 811.9              | 1            | 2.006  | 0.1341 |
| FIDTTSKFGHGR                        | 1366.5             | 2            | 3.8154 | 0.3762 |
| FIEAEQVPELEAVLHLVIASSDTR            | 2668.0             | 3            | 4.9666 | 0.3368 |
| FIEEHATK                            | 975.1              | 2            | 2.5649 | 0.1965 |
| FIEEHATKLSR                         | 1331.5             | 2            | 3.3665 | 0.2754 |
| FIEQEKAKLEQLFQDEVAK                 | 2294.6             | 3            | 6.0965 | 0.3339 |
| FIEQEKAKLEQLFQDEVAKAQQQLREEQQR      | 3561.9             | 3            | 3.427  | 0.1196 |
| FIGELGKLDLIHESILHK                  | 2063.4             | 2            | 5.1003 | 0.4076 |
| FIHDQTSPNPK                         | 1284.4             | 2            | 3.3441 | 0.1889 |

| Peptide Sequence                   | Peptide mass (m/z) | Charge State | Xcorr  | DelCn2 |
|------------------------------------|--------------------|--------------|--------|--------|
| FIHNSHDLTYFAYLIK                   | 1983.3             | 3            | 4.1183 | 0.2468 |
| FIHQQPQSSSPVYGSSAK                 | 1949.1             | 2            | 3.9751 | 0.3537 |
| FIHVSHLNANIK                       | 1393.6             | 2            | 3.2405 | 0.3377 |
| FIIHAPPGEFNEVFNDVR                 | 2102.3             | 3            | 4.6369 | 0.3985 |
| FIKPLSNAYHELAQVYSTNNPSELR          | 2893.2             | 3            | 6.549  | 0.5075 |
| FILNLPTFSVR                        | 1307.6             | 2            | 3.417  | 0.1334 |
| FIPHENGVTIDVK                      | 1606.8             | 2            | 4.115  | 0.4065 |
| FIPLSEPAPVPIIPNEQQLAR              | 2314.7             | 3            | 4.2485 | 0.3504 |
| FIQENIFGICPHMTEDNKDLIQGK           | 2792.2             | 3            | 4.4439 | 0.2944 |
| FIQFEPEEDIKRK                      | 1679.9             | 2            | 3.6719 | 0.1018 |
| FISDKDASIVGFFDDSFSEAHSEFLK         | 2940.2             | 2            | 7.3972 | 0.5519 |
| FISEQVSHHPPISAFHSEGLNHDFLFHGSIIYPK | 3777.2             | 3            | 3.9701 | 0.229  |
| FISGHTSELGDFR                      | 1466.6             | 2            | 3.1292 | 0.2157 |
| FISNPNSIILAVTAANTDMATSEALK         | 2694.1             | 3            | 4.5864 | 0.2671 |
| FISVGYVDDTQFVR                     | 1646.8             | 2            | 4.6363 | 0.5278 |
| FITHAPPGEFNEVFNDVR                 | 2090.3             | 3            | 4.5464 | 0.4195 |
| FIVDGWHEMDAENPLHQPSPLNK            | 2763.0             | 3            | 6.4259 | 0.4136 |
| FIVDGWHEMDAENPLHQPSPLNKLVAENK      | 3417.8             | 3            | 4.8846 | 0.3663 |
| FIVDGWHEMDAENPLHQPSPLNKLVAENKFGK   | 3750.2             | 3            | 4.6788 | 0.422  |
| FIVLSNNYLQIR                       | 1480.7             | 2            | 3.596  | 0.2618 |
| FIWYNNVINPTLPR                     | 1748.0             | 2            | 4.1595 | 0.2889 |
| FIYITPEELAAVANFIR                  | 1968.3             | 3            | 4.791  | 0.4181 |
| FKAADLNGDLTATR                     | 1493.6             | 2            | 2.867  | 0.2364 |
| FKARPELELLAK                       | 1544.8             | 2            | 3.827  | 0.2162 |
| FKATISALEAK                        | 1179.4             | 2            | 2.9228 | 0.2968 |
| FKAVSAK                            | 750.9              | 1            | 1.8211 | 0.1245 |
| FKDFLLSLK                          | 1111.4             | 2            | 3.1084 | 0.168  |
| FKDHVEGK                           | 960.1              | 2            | 2.8807 | 0.1952 |
| FKDIFQEIFDK                        | 1430.6             | 2            | 3.7202 | 0.286  |
| FKDIFQEIFDKHYK                     | 1859.1             | 2            | 4.7994 | 0.3559 |
| FKDIFQEIYDK                        | 1446.6             | 2            | 4.1622 | 0.2838 |
| FKDIFQEIYDKQYK                     | 1866.1             | 2            | 4.8951 | 0.4131 |
| FKDKSSEEAVR                        | 1296.4             | 2            | 3.3057 | 0.2482 |
| FKDLEDKKNQNPNTSDKK                 | 2263.5             | 3            | 4.2195 | 0.2347 |
| FKDLGEENFK                         | 1227.3             | 2            | 3.764  | 0.299  |
| FKDPGLVDQLVK                       | 1359.6             | 2            | 3.8623 | 0.2623 |



| Peptide Sequence       | Peptide mass (m/z) | Charge State | Xcorr  | DelCn2 |
|------------------------|--------------------|--------------|--------|--------|
| FKDPLKDGEAK            | 1248.4             | 2            | 2.8812 | 0.1004 |
| FKDPNAPK               | 917.0              | 1            | 1.7523 | 0.1275 |
| FKEANNFLWPFK           | 1541.8             | 2            | 4.1209 | 0.2645 |
| FKEDLLNNGQPR           | 1431.6             | 2            | 3.3648 | 0.2735 |
| FKEHVQNNLPR            | 1382.6             | 2            | 3.1046 | 0.2757 |
| FKEIAEAYDVLSDPR        | 1753.9             | 2            | 3.5805 | 0.329  |
| FKEMELPAK              | 1093.3             | 2            | 2.5555 | 0.1887 |
| FKEPAHALAFQQK          | 1515.7             | 2            | 4.0895 | 0.3336 |
| FKEQLTPSQIMSLEKEIMDK   | 2396.8             | 3            | 5.4382 | 0.3567 |
| FKEREENVK              | 1179.3             | 2            | 2.7676 | 0.1445 |
| FKESFAEMNR             | 1259.4             | 2            | 3.0705 | 0.2925 |
| FKEVIPISDPELK          | 1515.8             | 2            | 2.4231 | 0.1335 |
| FKEVIPISDPELKQK        | 1772.1             | 3            | 3.883  | 0.1048 |
| FKFLFNLPLNIER          | 1652.0             | 2            | 3.9676 | 0.2888 |
| FKFTIGDHSR             | 1208.4             | 2            | 3.138  | 0.3434 |
| FKFTVGDHSR             | 1194.3             | 2            | 3.0522 | 0.2833 |
| FKGDETVVIGQGKPYVFDR    | 2156.4             | 3            | 3.3755 | 0.3522 |
| FKGFDPNQLSVATLLFEGDREK | 2512.8             | 3            | 3.9432 | 0.2798 |
| FKGFPQPILSEDGSR        | 1678.9             | 2            | 3.5609 | 0.3822 |
| FKGPFTDVVTTNLK         | 1567.8             | 2            | 4.0885 | 0.3485 |
| FKIGDQEFDHLPALLEFYK    | 2311.6             | 2            | 4.726  | 0.4266 |
| FKILDVVAQEPLHR         | 1737.0             | 2            | 4.7217 | 0.4327 |
| FKIPGSPPEMGR           | 1403.6             | 2            | 2.8773 | 0.2465 |
| FKKDPPLAAVTTAVQELLR    | 2098.5             | 3            | 4.7307 | 0.353  |
| FKKEDEIPETVSLEMLDAAK   | 2294.6             | 3            | 4.7537 | 0.336  |
| FKKGDSVGLR             | 1107.3             | 2            | 2.4857 | 0.1012 |
| FKKYEEIDNAPEER         | 1768.9             | 2            | 5.086  | 0.3901 |
| FKLDLDFPNLPYLLDGK      | 2009.3             | 2            | 5.5516 | 0.3359 |
| FKLEESYDMESVLR         | 1747.0             | 2            | 4.5477 | 0.3149 |
| FKLEESYTLNSDLAR        | 1787.0             | 2            | 4.4406 | 0.426  |
| FKLGLDFPNLPYLIDGTHK    | 2189.5             | 3            | 5.7194 | 0.4511 |
| FKLITDVQGK             | 1278.5             | 2            | 3.3589 | 0.1532 |
| FKLPTKNEFIPTNFEILPLEK  | 2520.0             | 3            | 3.8706 | 0.1232 |
| FKLQDVADSFKK           | 1426.6             | 3            | 3.7586 | 0.2624 |
| FKLWYTLDR              | 1242.5             | 2            | 2.8472 | 0.2065 |
| FKNTEAIGNEVTR          | 1479.6             | 2            | 3.3734 | 0.2196 |

| Peptide Sequence                 | Peptide mass (m/z) | Charge State | Xcorr  | DelCn2 |
|----------------------------------|--------------------|--------------|--------|--------|
| FKNWDDVLTVDYTR                   | 1772.9             | 2            | 3.0053 | 0.2028 |
| FKPFTVEIVDSVEAYATMLR             | 2317.7             | 3            | 3.4188 | 0.2369 |
| FKPGVISEELQDALGVTDK              | 2047.3             | 2            | 2.5246 | 0.1453 |
| FKPLSDKIQQQR                     | 1488.7             | 2            | 3.6341 | 0.1647 |
| FKPLWIEEPTSPDDILGHATISK          | 2595.9             | 3            | 5.2815 | 0.2852 |
| FKPSLFQHVGTSSLAGK                | 1942.2             | 2            | 2.7019 | 0.1726 |
| FKQAETLYKEILTR                   | 1741.0             | 2            | 2.8188 | 0.1597 |
| FKQESTVATER                      | 1296.4             | 2            | 3.4318 | 0.2599 |
| FKQLQDER                         | 1064.2             | 2            | 2.6913 | 0.1085 |
| FKQLQDEREAVQK                    | 1619.8             | 2            | 4.5209 | 0.1533 |
| FKQMTEAIGPSTIR                   | 1579.8             | 2            | 3.8911 | 0.3386 |
| FKQMTEAIGPSTIRDLAVAGPEMQVK       | 2819.3             | 3            | 4.7201 | 0.3291 |
| FKSESDIHLAEHHK                   | 1678.8             | 2            | 4.1522 | 0.336  |
| FKSHTDQLVLIFAGK                  | 1705.0             | 2            | 4.0261 | 0.3395 |
| FKSLDDVIK                        | 1065.2             | 2            | 3.1147 | 0.125  |
| FKSLDDVIKR                       | 1221.4             | 3            | 3.5401 | 0.3168 |
| FKTEKEFMQHAR                     | 1552.8             | 2            | 3.5917 | 0.3066 |
| FKTEQENEAK                       | 1224.3             | 2            | 3.1551 | 0.2028 |
| FKTIEEVVGR                       | 1178.4             | 2            | 3.4259 | 0.2587 |
| FKTQLNLLLDKLR                    | 1602.9             | 2            | 2.4347 | 0.1217 |
| FKVDLTPYPTISSINKR                | 1980.3             | 2            | 4.2351 | 0.3181 |
| FKVLMTQQPRPVL                    | 1557.9             | 2            | 2.622  | 0.1143 |
| FKVSGGLPLMHVR                    | 1441.8             | 2            | 3.8485 | 0.3494 |
| FLAAGTHLGGTNLDFQMEQYIYE          | 2619.9             | 3            | 6.0944 | 0.1257 |
| FLAAGTHLGGTNLDFQMEQYIYER         | 2776.1             | 3            | 5.7666 | 0.1879 |
| FLAAGTHLGGTNLDFQMEQYIYK          | 2618.9             | 3            | 5.2517 | 0.2381 |
| FLADQQSEIDGLK                    | 1464.6             | 2            | 3.4258 | 0.2507 |
| FLAELLSEPNQTENDALEPEDLSQAAEQDEMR | 3634.8             | 3            | 5.2964 | 0.4457 |
| FLALLREEGASPLDFD                 | 1794.0             | 2            | 3.8925 | 0.3274 |
| FLASVLHNLGR                      | 1284.5             | 2            | 3.4974 | 0.3528 |
| FLATTPNSLLVSWQPPR                | 1928.2             | 3            | 4.1201 | 0.2604 |
| FLAVGLVDNTR                      | 1304.5             | 2            | 3.7925 | 0.2372 |
| FLCTGGVSPYADPNTCRGDSGGPLIVHKR    | 3019.4             | 3            | 4.1699 | 0.2846 |
| FLDAGHKLNFASR                    | 1646.9             | 2            | 4.8533 | 0.4524 |
| FLDGDELTLADCNLLPK                | 1878.1             | 2            | 3.5219 | 0.1464 |
| FLDGIYVSEK                       | 1171.3             | 2            | 3.6838 | 0.3117 |

| Peptide Sequence                          | Peptide mass (m/z) | Charge State | Xcorr  | DelCn2 |
|-------------------------------------------|--------------------|--------------|--------|--------|
| FLDPLPTSGITPGATVLTASGQTVGK                | 2529.9             | 3            | 4.7196 | 0.3571 |
| FLDRYFYNQEESVR                            | 1867.0             | 2            | 3.6471 | 0.3428 |
| FLDTAFNLQAFEGK                            | 1601.8             | 2            | 4.8362 | 0.4305 |
| FLEDTFGNDGRPR                             | 1524.6             | 2            | 2.7842 | 0.226  |
| FLEEHPPGGEEVLR                            | 1512.6             | 2            | 4.0954 | 0.3276 |
| FLEEHPPGGEEVLRREQAGGDATENFEDVGHSTDAR      | 3700.8             | 3            | 6.0555 | 0.5171 |
| FLEEYLSSTPQR                              | 1470.6             | 2            | 3.476  | 0.3272 |
| FLEFQYLTGGLVDPEVHGR                       | 2178.4             | 3            | 5.1575 | 0.4626 |
| FLEHKGPVFAPPYEPLPENVKFYDYGK               | 3183.6             | 3            | 6.5915 | 0.524  |
| FLEHLSGAGK                                | 1059.2             | 2            | 2.6861 | 0.1985 |
| FLEQQNKILLAELEQLKGQK                      | 2428.8             | 3            | 7.3596 | 0.2874 |
| FLEQQNKLLETKWTLLEQK                       | 2518.9             | 3            | 3.3151 | 0.1552 |
| FLEQQNKMLETK                              | 1509.8             | 2            | 3.1187 | 0.1812 |
| FLEQVHQLYDDSFPMER                         | 2268.5             | 2            | 3.8478 | 0.4139 |
| FLESGGQDGAGDDDDLEDLEEAEEPDMEEEDDDQK       | 3759.7             | 3            | 6.6457 | 0.4639 |
| FLESGGQDGAGDDDDLEDLEEAEEPDMEEEDDDQKAVKDEL | 4415.4             | 3            | 5.8556 | 0.4216 |
| FLESVEGNQNYPLLLTLLEK                      | 2434.8             | 2            | 4.5091 | 0.4068 |
| FLEVIKPFVILPEIQKPER                       | 2399.9             | 3            | 4.4249 | 0.3417 |
| FLEVQYLTGGLIEPDTGRVPLDEALQR               | 3128.5             | 3            | 5.5775 | 0.4002 |
| FLFENQTPAHVYYR                            | 1786.0             | 2            | 2.4489 | 0.1789 |
| FLFPFFDSAYQGFASGNLER                      | 2314.5             | 2            | 4.2688 | 0.4667 |
| FLGEGHHR                                  | 953.0              | 2            | 2.5105 | 0.2038 |
| FLGGDMEHHLVK                              | 1484.7             | 2            | 2.6995 | 0.2311 |
| FLGLTERDVELLYPVKEK                        | 2150.5             | 3            | 4.0134 | 0.177  |
| FLGLYRDEHQDFMDEQKR                        | 2328.5             | 3            | 4.2093 | 0.2765 |
| FLGPEIFFHPEFANPDFTQPISEVVDEVIQNCPIDVR     | 4261.8             | 3            | 3.9456 | 0.3127 |
| FLGRDPKQDAFLLSK                           | 1736.0             | 2            | 3.9455 | 0.2181 |
| FLGTEPEPDAVGLDSGHIR                       | 2011.2             | 3            | 4.9112 | 0.4893 |
| FLGTVEKEATFSNPK                           | 1668.9             | 2            | 3.1504 | 0.2697 |
| FLIDGFPR                                  | 965.1              | 2            | 2.7343 | 0.1376 |
| FLIPNASQAESK                              | 1305.5             | 2            | 2.521  | 0.2365 |
| FLIPNASQAESKVFYK                          | 1956.3             | 2            | 3.3755 | 0.2394 |
| FLITHNPTNATLNKFTEELKK                     | 2460.8             | 3            | 4.2339 | 0.2763 |
| FLIVAHDDGR                                | 1143.3             | 2            | 3.0221 | 0.2709 |
| FLKEEPHKLDSLLK                            | 1698.0             | 2            | 3.3332 | 0.2577 |
| FLKGDTTDLLK                               | 1251.5             | 2            | 2.6334 | 0.1547 |

| Peptide Sequence                    | Peptide mass (m/z) | Charge State | Xcorr  | DelCn2 |
|-------------------------------------|--------------------|--------------|--------|--------|
| FLKNEVER                            | 1035.2             | 2            | 2.4242 | 0.106  |
| FLLDHQGELEFPSPDPSGL                 | 1970.2             | 2            | 4.0583 | 0.2895 |
| FLLDNPYHTYYSYSCSGSAITCSSK           | 2747.0             | 3            | 5.378  | 0.3456 |
| FLLDTLKASPSEVVFLDDIGANLKPAR         | 2931.4             | 3            | 5.6908 | 0.3572 |
| FLLGYFPWDSTKEER                     | 1889.1             | 2            | 2.9115 | 0.1123 |
| FLLHQETLPEQLLAEK                    | 1910.2             | 2            | 3.4183 | 0.3894 |
| FLLSDQSLLLLPEYHQR                   | 2073.4             | 2            | 2.7824 | 0.2166 |
| FLLYTNENPNNFQEVAADSSSISGSNFK        | 3095.3             | 3            | 5.9321 | 0.5035 |
| FLLYTNENPNNFQLITGTEPDTIEASNFQLDRK   | 3845.2             | 3            | 4.163  | 0.1762 |
| FLNALTLNMIR                         | 1306.6             | 2            | 4.1054 | 0.3295 |
| FLNEHPGGEEVLLEQAGVDASESFEDVGHSSDAR  | 3629.8             | 3            | 6.3335 | 0.4936 |
| FLNRHDLDLICR                        | 1515.8             | 2            | 2.926  | 0.229  |
| FLNSFASMHR                          | 1210.4             | 2            | 2.9387 | 0.2182 |
| FLNVLSR                             | 946.1              | 2            | 2.4983 | 0.1494 |
| FLNYVQSQHQR                         | 1420.6             | 2            | 3.4849 | 0.3566 |
| FLPREEGPYEVEVTDGVPVPGSPFPLEAVPTKPSK | 4001.5             | 3            | 5.4263 | 0.4093 |
| FLPSYQAVEYMR                        | 1504.7             | 2            | 4.2841 | 0.4184 |
| FLQDPYSTTFSSFSR                     | 1783.9             | 2            | 4.6948 | 0.3885 |
| FLQDYFDGNLK                         | 1360.5             | 2            | 4.0346 | 0.3185 |
| FLQDYFDGNLKR                        | 1516.7             | 2            | 4.2956 | 0.3015 |
| FLQEHGSDSFLAEHK                     | 1745.9             | 2            | 4.7038 | 0.4214 |
| FLQEHGSDSFLAEHKLLGNIK               | 2384.7             | 3            | 4.9099 | 0.3179 |
| FLQEHGSDSFLAEHKLLGNIKNVAK           | 2797.2             | 3            | 3.2078 | 0.1552 |
| FLQEHLAPK                           | 1083.3             | 2            | 2.8784 | 0.2077 |
| FLQESNVLYQHNL                       | 1762.0             | 2            | 3.6052 | 0.1127 |
| FLQHGTLVGLLPVPHILIR                 | 2221.7             | 2            | 4.1132 | 0.3056 |
| FLQLESLQELMK                        | 1479.8             | 2            | 3.3626 | 0.1572 |
| FLQSSASVQNHEFLLVHHLQR               | 2491.8             | 3            | 3.2378 | 0.1177 |
| FLRDLPDGLFTR                        | 1450.7             | 2            | 2.5527 | 0.1591 |
| FLRENPYYDSR                         | 1460.6             | 2            | 3.4706 | 0.2814 |
| FLREWVESMGK                         | 1439.7             | 2            | 3.0051 | 0.2019 |
| FLREWVESMGKVPATQK                   | 2161.5             | 3            | 4.4368 | 0.4602 |
| FLSDPQVHTVLVER                      | 1640.9             | 2            | 4.6868 | 0.4407 |
| FLSGLELVK                           | 1006.2             | 2            | 2.4981 | 0.168  |
| FLSHLVDGVKR                         | 1271.5             | 2            | 2.6816 | 0.1062 |
| FLSHSLVELLNQISPTFKK                 | 2202.6             | 2            | 3.3224 | 0.1508 |

| Peptide Sequence                       | Peptide mass (m/z) | Charge State | Xcorr  | DelCn2 |
|----------------------------------------|--------------------|--------------|--------|--------|
| FLSLDLQGDPPRESQPLLGTVIDGMILLKTPEELQAER | 4124.7             | 3            | 4.6262 | 0.3547 |
| FLSNGHVTIPGQQDK                        | 1641.8             | 2            | 4.9982 | 0.293  |
| FLSNGHVTIPGQQDKDMFQETMEAMR             | 3012.4             | 3            | 5.6866 | 0.4634 |
| FLSPQDTFEALKR                          | 1552.8             | 2            | 2.9779 | 0.1185 |
| FLSPVVPNYDNVHPNYHK                     | 2141.4             | 2            | 3.928  | 0.424  |
| FLSPVVPNYDNVHPNYHKEPFLQQLK             | 3125.5             | 3            | 3.3302 | 0.2227 |
| FLSQPFQVAEVFTGHMGK                     | 2024.3             | 2            | 4.7138 | 0.4688 |
| FLSSAAAVSKEHPVVISK                     | 1871.2             | 3            | 3.5123 | 0.2479 |
| FLTAGRTDPAHDVR                         | 1556.7             | 2            | 3.3078 | 0.2982 |
| FLTALAQDGVINEEALSVTELDLDR              | 2505.8             | 3            | 4.4537 | 0.3816 |
| FLTALAQDGVINEEALSVTELDLDRVYGGGLTTK     | 3325.7             | 3            | 5.1759 | 0.3767 |
| FLTAVNLEHPEMLEK                        | 1772.1             | 2            | 4.8841 | 0.3542 |
| FLTGPLNLNDPDAK                         | 1515.7             | 2            | 3.7411 | 0.2897 |
| FLTKGDNNAVDDR                          | 1465.6             | 2            | 2.9622 | 0.1423 |
| FLTLPVHLHLQLMR                         | 1679.1             | 2            | 2.5832 | 0.2133 |
| FLTVLCSR                               | 939.2              | 2            | 2.4602 | 0.2089 |
| FLVVFANFDENDPK                         | 1655.8             | 2            | 4.589  | 0.3254 |
| FLVGFTNK                               | 926.1              | 2            | 2.7969 | 0.1579 |
| FLVGFTNKGTEDFIVESLDASFR                | 2593.9             | 3            | 3.4682 | 0.2762 |
| FLVGPYQNTIGAAFVAK                      | 1797.1             | 2            | 3.6526 | 0.3852 |
| FLVLDEADGLLSQGYSDFINR                  | 2373.6             | 3            | 6.0817 | 0.5679 |
| FLVTHSMR                               | 991.2              | 2            | 2.4628 | 0.1667 |
| FLYLGDDRNIIEVYVGGK                     | 2088.3             | 2            | 3.9663 | 0.3309 |
| FLYVGGALHALPTGLR                       | 1686.0             | 2            | 3.0904 | 0.313  |
| FMATNDLMTLQK                           | 1542.8             | 2            | 2.5276 | 0.1631 |
| FMATNDLMTLQKDSIKLDDDSER                | 2817.1             | 3            | 4.6186 | 0.3994 |
| FMDEFFEQVEEIR                          | 1719.9             | 2            | 4.2879 | 0.3799 |
| FMEDTAAEKLHK                           | 1420.6             | 2            | 2.8497 | 0.2145 |
| FMELLEPLNER                            | 1391.6             | 2            | 3.4901 | 0.1879 |
| FMETVAEK                               | 955.1              | 1            | 2.5781 | 0.2464 |
| FMETVAEKALQEYR                         | 1716.0             | 2            | 4.6895 | 0.4678 |
| FMHVLYPR                               | 1063.3             | 2            | 2.6999 | 0.1706 |
| FMLQDVIDLR                             | 1250.5             | 2            | 3.6763 | 0.2596 |
| FMNPFNMPNLYQK                          | 1644.9             | 2            | 3.723  | 0.3798 |
| FMQASEDLLKEHYVDLKDRPFFAGLVK            | 3198.7             | 3            | 4.6694 | 0.2696 |
| FMQDASDVMQLLLK                         | 1640.0             | 2            | 4.203  | 0.3485 |

| Peptide Sequence                   | Peptide mass (m/z) | Charge State | Xcorr  | DelCn2 |
|------------------------------------|--------------------|--------------|--------|--------|
| FMQDPMEIFVDDETKLTLLHGLQQYYVK       | 3290.8             | 3            | 3.8011 | 0.3475 |
| FMQTFVLAPEGSVANK                   | 1740.0             | 2            | 4.3428 | 0.4369 |
| FMQTFVLAPEGSVPNK                   | 1766.1             | 2            | 2.8695 | 0.2081 |
| FMRDNYPPGFSYADFGPQFTAR             | 2585.8             | 3            | 4.13   | 0.3559 |
| FMVQTIFAPPNTSDMEAVWKEAKPDELMDSKLR  | 3827.4             | 3            | 4.3515 | 0.3224 |
| FNADEFEDMVAEK                      | 1545.7             | 2            | 3.0122 | 0.2384 |
| FNADEFEDMVAEKR                     | 1701.8             | 3            | 3.9781 | 0.3103 |
| FNADEFEYVVAEK                      | 1561.7             | 2            | 3.38   | 0.3318 |
| FNAHEFATLVIDILSDAK                 | 2005.3             | 2            | 3.9558 | 0.3036 |
| FNAHGDANTIVCNSK                    | 1591.7             | 2            | 4.0575 | 0.4213 |
| FNALFAQGNYSEAAK                    | 1631.8             | 2            | 5.0368 | 0.44   |
| FNALKVPVPEDKYTAQVDAEEKEDVK         | 2964.3             | 3            | 5.8052 | 0.4241 |
| FNASQLITQR                         | 1178.3             | 2            | 3.9078 | 0.2195 |
| FNDEHIPESPYLVPVIAPSDDAR            | 2582.8             | 2            | 4.0291 | 0.2469 |
| FNDGKVDPAGR                        | 1176.3             | 2            | 3.1432 | 0.2674 |
| FNDGSDEKK                          | 1040.1             | 2            | 2.6248 | 0.1367 |
| FNDGSDEKKK                         | 1168.2             | 2            | 3.0343 | 0.2438 |
| FNEELRAVDSEYPKNIK                  | 2053.3             | 3            | 3.427  | 0.1904 |
| FNEKDGHVER                         | 1231.3             | 2            | 3.4687 | 0.2796 |
| FNFFALLPHQR                        | 1390.6             | 2            | 3.2844 | 0.2238 |
| FNFGAYHTLEEISQEMDNLVAEHPGLVSK      | 3277.6             | 3            | 6.229  | 0.4648 |
| FNFLAPELPAVSEFSTSETMGHSADR         | 2842.1             | 2            | 3.4115 | 0.4272 |
| FNGGGHINHSIFWTNLSPNGGGEPK          | 2638.8             | 3            | 5.4485 | 0.5137 |
| FNGGGHINHSIFWTNLSPNGGGEPKGELLEAIK  | 3492.8             | 3            | 5.9316 | 0.3246 |
| FNGGGHINHSIFWTNLSPNGGGEPKGELLEAIKR | 3649.0             | 3            | 5.8946 | 0.4104 |
| FNGGHSPTHSPEK                      | 1395.5             | 2            | 3.3532 | 0.2376 |
| FNGSHVVGSPFK                       | 1276.4             | 2            | 3.7984 | 0.2993 |
| FNGTHIPGSPFK                       | 1302.5             | 2            | 2.9317 | 0.152  |
| FNHNLLPSETAHKPDLSK                 | 2136.4             | 2            | 4.7579 | 0.4504 |
| FNILGTHTK                          | 1031.2             | 2            | 2.4435 | 0.1176 |
| FNISNGGPAPEAITDK                   | 1631.8             | 2            | 4.1977 | 0.266  |
| FNISNGGPAPEAITDKIFQISK             | 2348.6             | 3            | 3.7852 | 0.2561 |
| FNKLFLNEDDKPHNPMVNAGAIIVTSLIK      | 3226.7             | 3            | 5.353  | 0.3759 |
| FNKPFVFLMIEQNTK                    | 1857.2             | 2            | 5.8284 | 0.3124 |
| FNLLAHLADDLGHVVPNSR                | 2089.3             | 2            | 5.222  | 0.4276 |
| FNLTGLNEQVPHYR                     | 1688.9             | 2            | 2.5385 | 0.2321 |

| Peptide Sequence                  | Peptide mass (m/z) | Charge State | Xcorr  | DelCn2 |
|-----------------------------------|--------------------|--------------|--------|--------|
| FNLTYVSHDGDGDKKRPVIVHR            | 2497.8             | 3            | 4.2017 | 0.2557 |
| FNNWGGSLSLGHPFGATGCR              | 2079.3             | 2            | 2.5199 | 0.1071 |
| FNPETDYLTGTDGK                    | 1558.6             | 2            | 3.7653 | 0.3312 |
| FNPETDYLTGTDGKK                   | 1686.8             | 2            | 3.7465 | 0.3015 |
| FNPFVTSDR                         | 1083.2             | 2            | 2.6292 | 0.2363 |
| FNQLVEQYKQK                       | 1425.6             | 2            | 2.8822 | 0.1641 |
| FNRYPLIIDPSGQATEFIMNEYKDR         | 3019.4             | 3            | 5.3092 | 0.3165 |
| FNRYPLIIDPSGQATEFIMNEYKDRK        | 3147.6             | 3            | 4.6141 | 0.4643 |
| FNTANDDNVTQVR                     | 1494.5             | 2            | 3.953  | 0.3454 |
| FNVGEDCPVFDGLFEFCQLSTGGSVASAVK    | 3125.5             | 3            | 4.4642 | 0.285  |
| FNVGEDCPVFDGLFEFCQLSTGGSVASAVKLNK | 3480.9             | 3            | 3.7444 | 0.2688 |
| FNVIQPGPIK                        | 1113.3             | 2            | 2.8145 | 0.1761 |
| FNVLHWHIVDDQSFPYQSITFPELSNK       | 3263.6             | 3            | 4.683  | 0.2834 |
| FNVLQYVVPEVK                      | 1435.7             | 2            | 3.9034 | 0.233  |
| FNVTGTPEQYVPYSTTR                 | 1961.1             | 2            | 3.8772 | 0.4245 |
| FNVWDTAGQEK                       | 1295.4             | 2            | 2.4258 | 0.1639 |
| FNYGFEYLGVDK                      | 1580.7             | 2            | 4.0538 | 0.3174 |
| FNYGFEYLGVDKLVQTPLTDR             | 2604.9             | 3            | 3.5597 | 0.2334 |
| FNYSGSGGR                         | 945.0              | 2            | 2.6649 | 0.1747 |
| FPAEDEFPDLSAHNNHMAK               | 2171.3             | 3            | 4.966  | 0.4404 |
| FPEHELTFDPQR                      | 1516.6             | 2            | 3.2997 | 0.2663 |
| FPELESLVPNALDYIR                  | 1877.1             | 2            | 3.0095 | 0.2106 |
| FPFIPMLDYILPELLK                  | 2047.5             | 2            | 4.7939 | 0.4247 |
| FPFLGVHFTPR                       | 1318.6             | 2            | 3.4539 | 0.2018 |
| FPGINYPVLTPNLK                    | 1573.9             | 2            | 3.5891 | 0.252  |
| FPGLHSFAPDKPGGILMMDLKEEKPR        | 2912.4             | 3            | 4.7065 | 0.3893 |
| FPGQLNADLR                        | 1131.3             | 2            | 2.4563 | 0.1522 |
| FPGQLNADLRK                       | 1259.4             | 2            | 2.9287 | 0.1742 |
| FPGYDSESKEFNAEVHRK                | 2141.3             | 2            | 4.4534 | 0.4181 |
| FPLDYYSIPFPTPTTPTLGR              | 2284.6             | 2            | 3.2289 | 0.263  |
| FPNQNQTR                          | 1005.1             | 2            | 2.4948 | 0.1197 |
| FPPEASGYLHIGHAK                   | 1624.8             | 2            | 2.6947 | 0.2562 |
| FPSHFSSDLKDLLR                    | 1662.9             | 2            | 3.7733 | 0.3286 |
| FPVFNPAEEELCQVEEGDKEDVDK          | 2869.1             | 3            | 3.6736 | 0.2135 |
| FPVFNPAEEELCQVEEGDKEDVDKAVK       | 3167.4             | 3            | 4.9656 | 0.3362 |
| FPVGPPKNDDTPNR                    | 1554.7             | 2            | 3.7541 | 0.3947 |

| Peptide Sequence              | Peptide mass (m/z) | Charge State | Xcorr  | DelCn2 |
|-------------------------------|--------------------|--------------|--------|--------|
| FPVGPPKNDTTPNRQYWDEDLLMK      | 2877.2             | 3            | 3.4624 | 0.1444 |
| FQAHQQQGNK                    | 1186.3             | 2            | 2.8216 | 0.2165 |
| FQAKLEHEYIQNFK                | 1796.0             | 2            | 5.1698 | 0.3675 |
| FQAPISAPEYTVTPSPQQAR          | 2189.4             | 2            | 2.6531 | 0.134  |
| FQDDPDGLHQLDGTPLTAEDIVHK      | 2662.8             | 3            | 5.0281 | 0.4228 |
| FQDGDLTLYQSNTILR              | 1885.1             | 2            | 6.2014 | 0.4992 |
| FQDLGAAYEVLSDSEK              | 1772.9             | 2            | 4.6457 | 0.3621 |
| FQDLGAAYEVLSDSEKR             | 1929.1             | 2            | 2.4568 | 0.2353 |
| FQDNFEFVQWFK                  | 1635.8             | 2            | 3.6782 | 0.3834 |
| FQDNLDFIQWFK                  | 1601.8             | 2            | 3.0757 | 0.196  |
| FQDNLDFIQWFKK                 | 1730.0             | 2            | 3.9405 | 0.3458 |
| FQDTAEALAAFTALMEGK            | 1915.2             | 2            | 5.4467 | 0.48   |
| FQDTDGKHLLPK                  | 1399.6             | 2            | 3.2686 | 0.3107 |
| FQDVGPQAPVGSVYQK              | 1720.9             | 2            | 5.4442 | 0.4618 |
| FQEAKGDSPQEK                  | 1364.4             | 2            | 3.7387 | 0.2121 |
| FQEHIIQAPKPVEAIK              | 1849.2             | 2            | 5.1614 | 0.3355 |
| FQEHIIQAPKPVEAIKRPSDEPMTNLELK | 3458.0             | 3            | 4.8679 | 0.3952 |
| FQELDSR                       | 895.0              | 1            | 2.2626 | 0.1084 |
| FQELIFEDFAR                   | 1415.6             | 2            | 3.6779 | 0.2942 |
| FQELLQDLEKKER                 | 1676.9             | 2            | 4.2716 | 0.2195 |
| FQESEERPCLFEELGK              | 1967.2             | 2            | 4.0549 | 0.2864 |
| FQESEERPCLFEELGKQIQQYMK       | 2887.3             | 3            | 3.5012 | 0.1561 |
| FQETFEDVFSR                   | 1520.6             | 2            | 3.6273 | 0.3832 |
| FQEYHIQQNEALAAK               | 1791.0             | 2            | 5.4568 | 0.4184 |
| FQFPPSWLYIDNIEGEWGAFNDIMR     | 3047.4             | 3            | 4.1535 | 0.2362 |
| FQFPPSHVTDVSEEAKDLIQR         | 2347.6             | 3            | 4.6835 | 0.2459 |
| FQGEDTVVIASKPYAFDR            | 2044.3             | 2            | 5.333  | 0.4768 |
| FQHPSHELLK                    | 1236.4             | 2            | 2.5792 | 0.1765 |
| FQIGDYLDIAITPPNR              | 1834.1             | 2            | 3.1286 | 0.1637 |
| FQIPPNAELKYELHLK              | 1941.3             | 2            | 3.6281 | 0.3348 |
| FQKELKEIQYGIR                 | 1652.9             | 3            | 3.3678 | 0.1807 |
| FQKENPGFDFSGAEISGNYTK         | 2337.5             | 2            | 5.3742 | 0.4255 |
| FQKTLYVEEVVPPNIEPSFGLGR       | 2623.0             | 3            | 4.1947 | 0.286  |
| FQLAVEALEQEQQLQSQIAQVLEGR     | 2914.3             | 3            | 6.2083 | 0.4377 |
| FQLLEGPPEMGR                  | 1461.7             | 2            | 4.368  | 0.276  |
| FQLTSDEMSLLR                  | 1440.6             | 2            | 3.0924 | 0.2559 |



| Peptide Sequence                            | Peptide mass (m/z) | Charge State | Xcorr  | DelCn2 |
|---------------------------------------------|--------------------|--------------|--------|--------|
| FQMAYSNLLR                                  | 1243.5             | 2            | 3.0969 | 0.256  |
| FQMPDQGMTSADDFQGTK                          | 2152.4             | 2            | 5.536  | 0.4782 |
| FQMTQEVVCDECPNVK                            | 1871.1             | 2            | 4.4167 | 0.2475 |
| FQNALLVR                                    | 961.1              | 2            | 2.9797 | 0.2338 |
| FQNIDFAEEVYTR                               | 1632.8             | 2            | 3.3772 | 0.2658 |
| FQPGETLTEILETPATSEQEAEHQR                   | 2843.0             | 2            | 4.8307 | 0.4433 |
| FQQAVIDAVEEFLR                              | 1552.7             | 2            | 3.8626 | 0.3016 |
| FQQLANISMSGNNLAEILPPALQDIKELQHDVQK          | 3805.3             | 3            | 4.3335 | 0.1015 |
| FQQQLEQLNAMGFLNREANLQALIATGGDINAAIERLLGSQPS | 4643.2             | 3            | 5.3319 | 0.3206 |
| FQSAAGALQEASEAYLVGLFEDTNLCAIHAK             | 3382.8             | 3            | 6.0301 | 0.4951 |
| FQSAAGALQEASEAYLVNLFEDTNLCAIHAK             | 3439.8             | 3            | 4.5961 | 0.2545 |
| FQSKYEPR                                    | 1055.2             | 2            | 2.5786 | 0.2586 |
| FQSLGVAFYR                                  | 1188.4             | 2            | 3.6713 | 0.2506 |
| FQSSAVMALQEASEAYLVGLFEDTNLCAIHAK            | 3458.9             | 3            | 4.595  | 0.353  |
| FQSSHPTDITSLDQYVER                          | 2261.4             | 3            | 5.941  | 0.4888 |
| FQSVESGANNVVFIR                             | 1667.8             | 2            | 4.602  | 0.4819 |
| FQSVPAQPGQTSPLLQYFGILLDQGQLNK               | 3189.6             | 3            | 4.7288 | 0.3232 |
| FQTHAEAQAINTLHSSR                           | 1983.1             | 3            | 4.9579 | 0.325  |
| FQVDKVNFMFDVGGQR                            | 2025.3             | 2            | 3.1693 | 0.3906 |
| FQVDPSGEIVELAK                              | 1532.7             | 2            | 3.0155 | 0.1636 |
| FQVIVYNPLGR                                 | 1306.5             | 2            | 3.708  | 0.2695 |
| FQVWDYEEGEVEALLDR                           | 2099.2             | 2            | 2.8784 | 0.2498 |
| FQVWDYEEGEVEALLDRYFEADPPGQVAASPDPTT         | 3944.2             | 3            | 4.9225 | 0.4542 |
| FRAPDEPQQAQVPHVWGWEVAGAPALR                 | 3014.3             | 3            | 4.5263 | 0.2826 |
| FRAPPELLFQPDVLDGESEGLHEVVAFAIHK             | 3365.8             | 3            | 6.7764 | 0.587  |
| FRAPPELLFRPDLIGEESEGIHEVLVFAIQK             | 3455.0             | 3            | 4.3026 | 0.3667 |
| FRCPEALFQPSFLGMESCGIHETTFFNSIMK             | 3423.0             | 3            | 4.7739 | 0.3399 |
| FRDEELEHHDIGLDHDAELAPAYAVLK                 | 3105.4             | 3            | 4.8098 | 0.307  |
| FRDEFVIPHLHK                                | 1538.8             | 2            | 2.8922 | 0.2707 |
| FREALGDAQQSVR                               | 1477.6             | 2            | 4.0618 | 0.2386 |
| FREDHPDLIQNAK                               | 1583.7             | 2            | 4.5826 | 0.3578 |
| FREFVYQEAAGPHQTLAR                          | 2121.3             | 3            | 4.5698 | 0.2066 |
| FRELAEEAAR                                  | 1192.3             | 2            | 3.3347 | 0.2082 |
| FRELLLYGR                                   | 1167.4             | 2            | 3.4296 | 0.2141 |
| FREMIPFAVVGSDHEYQVNGK                       | 2424.7             | 3            | 5.8854 | 0.3885 |
| FRENVQDVLPALPNPDDYFLLR                      | 2633.0             | 3            | 4.2259 | 0.1484 |

| Peptide Sequence                             | Peptide mass (m/z) | Charge State | Xcorr  | DelCn2 |
|----------------------------------------------|--------------------|--------------|--------|--------|
| FRFDGQPINETDTPAQLEMEDEDTIDVFQQQTGG           | 3874.1             | 3            | 5.855  | 0.4446 |
| FRFNFLAPELPAVSEFSTSETMGHSADR                 | 3145.5             | 3            | 6.1123 | 0.4931 |
| FRFPHIDLVVQR                                 | 1527.8             | 2            | 3.2004 | 0.276  |
| FRGCLAGALLGDCVGSFYEAHDTVDLTSVLR              | 3287.7             | 3            | 4.259  | 0.2567 |
| FRGHGSEASVSK                                 | 1262.4             | 2            | 2.9294 | 0.1878 |
| FRGHLDNISNLLIGAINIENGK                       | 2523.8             | 3            | 5.4463 | 0.2731 |
| FRGHLDNISNLLIGAINIENGKANSVR                  | 3051.4             | 3            | 6.8341 | 0.4236 |
| FRGPFTDVVTTNLK                               | 1595.8             | 2            | 4.4673 | 0.2962 |
| FRHENIIGINDIIR                               | 1711.0             | 3            | 4.5032 | 0.2984 |
| FRHHLGDDVVLFTTDGAHK                          | 2166.4             | 3            | 4.3825 | 0.2451 |
| FRHNIAYFPQIVSVAAR                            | 1990.3             | 3            | 4.7067 | 0.4404 |
| FRIDELEPR                                    | 1175.3             | 2            | 3.0702 | 0.2371 |
| FRISHELDSASSEVN                              | 1691.8             | 2            | 3.9128 | 0.46   |
| FRLEAPDADELPGGEFDPGQDITYQHPPK                | 3199.4             | 3            | 3.9484 | 0.2026 |
| FRLEAPDADELPGGEFDPGQDITYQHPPKDSSGQHVDVSPTSQR | 4781.0             | 3            | 3.7949 | 0.4064 |
| FRENDLEELALYQIQLLK                           | 2349.7             | 2            | 5.1713 | 0.297  |
| FRENDLEELALYQIQLLKDLR                        | 2734.1             | 3            | 5.2115 | 0.3379 |
| FRLPPGEYVVVPSTFEPNKEGDFVLR                   | 2994.4             | 3            | 7.2497 | 0.5443 |
| FRNPPGGDNLEER                                | 1501.6             | 2            | 3.2884 | 0.2253 |
| FRPAGAAPRPPPKPM                              | 1590.9             | 2            | 3.4891 | 0.3274 |
| FRPFYLSQLEESVEEDVK                           | 2216.4             | 3            | 3.9695 | 0.1479 |
| FRPLNEAEILR                                  | 1358.6             | 2            | 3.0254 | 0.1475 |
| FRPSDEHHPEVK                                 | 1478.6             | 2            | 3.1359 | 0.2439 |
| FRPSEPHFTLDGNSFYK                            | 2043.2             | 3            | 3.6245 | 0.3002 |
| FRQDLMNIAGTTLSSK                             | 1783.0             | 3            | 4.5656 | 0.4413 |
| FRRPDIQYPDATDEEDITSHMESEELNGAYK              | 3529.7             | 3            | 5.9014 | 0.4098 |
| FRSETITEEELVGLMKN                            | 1997.3             | 2            | 5.6152 | 0.4365 |
| FRSETITEEELVGLMKNKFVEDTK                     | 2717.0             | 3            | 3.9814 | 0.2097 |
| FRSHEGETAYIR                                 | 1466.6             | 3            | 3.984  | 0.2632 |
| FRTEAAAAAPQR                                 | 1289.4             | 2            | 3.3723 | 0.3767 |
| FSALQQAVPTTESTDNRR                           | 1921.1             | 2            | 3.3184 | 0.125  |
| FSAQSQAR                                     | 895.0              | 2            | 2.5702 | 0.1777 |
| FSASLAPHFNLSLPR                              | 1544.7             | 2            | 3.1629 | 0.3508 |
| FSATEVTNKTAAEMQELR                           | 2140.4             | 2            | 4.1154 | 0.3517 |
| FSDEPPEVYGDFEPLVAK                           | 2040.2             | 2            | 4.4933 | 0.4284 |
| FSDFLGLHSK                                   | 1151.3             | 2            | 3.2093 | 0.1253 |

| Peptide Sequence                   | Peptide mass (m/z) | Charge State | Xcorr  | DelCn2 |
|------------------------------------|--------------------|--------------|--------|--------|
| FSDFLGLYEK                         | 1219.4             | 2            | 2.7481 | 0.2669 |
| FSDHVALLSVFQAWDDAR                 | 2078.3             | 2            | 3.1442 | 0.2502 |
| FSELTAEK                           | 925.0              | 2            | 2.5966 | 0.12   |
| FSELTAEKLGFAGLVQEISFGTTKDK         | 2818.2             | 3            | 4.8221 | 0.3327 |
| FSESTIVCNSLDGSNWGQEQREDHLCFSPGSEVK | 3788.0             | 3            | 3.2087 | 0.1101 |
| FSFSGNTLVSSSADPEGHFETPIWIER        | 3012.2             | 3            | 4.0758 | 0.3303 |
| FSGEELDKLWR                        | 1380.5             | 2            | 2.6445 | 0.2573 |
| FSGTWYAMAK                         | 1162.3             | 2            | 2.7602 | 0.135  |
| FSGWYDADLSPAGHEEAK                 | 1981.1             | 2            | 5.3051 | 0.4929 |
| FSGWYDADLSPAGHEEAKR                | 2137.3             | 3            | 5.1592 | 0.5205 |
| FSHEEIAMATVTALR                    | 1676.9             | 2            | 4.8551 | 0.49   |
| FSHEEIAMATVTALRR                   | 1833.1             | 2            | 3.8255 | 0.3626 |
| FSHLAADTIINGGATSHLAPTDPADR         | 2649.9             | 3            | 3.8155 | 0.2192 |
| FSIFGKDFLLNYPFSTSVK                | 2211.5             | 3            | 5.7579 | 0.4684 |
| FSILTVNNDITLLK                     | 1591.9             | 2            | 4.8049 | 0.3889 |
| FSKEFEEASSKLEEFVNGLDK              | 2434.6             | 3            | 4.0782 | 0.3274 |
| FSKGEILQIVNR                       | 1404.6             | 2            | 2.823  | 0.3852 |
| FSLDALITHVLPFEK                    | 1731.0             | 2            | 3.8752 | 0.2673 |
| FSLDALITNILPFEKINEGFDLLR           | 2780.2             | 3            | 3.9269 | 0.2741 |
| FSLENNFLLQHNIR                     | 1746.0             | 2            | 3.4918 | 0.3917 |
| FSLFAGGMLR                         | 1099.3             | 2            | 3.7607 | 0.3673 |
| FSLVPHNYGLVLYENK                   | 1894.2             | 3            | 4.6625 | 0.4031 |
| FSLYFLAYEDKNDIPKEKDEK              | 2593.9             | 3            | 4.4062 | 0.2897 |
| FSMPGFKAEGPEVDVNLPK                | 2063.4             | 2            | 3.5316 | 0.2397 |
| FSMPGFKGEGPEVDMNLPK                | 2081.4             | 2            | 2.5681 | 0.2061 |
| FSMVVQDGIVK                        | 1223.5             | 2            | 3.9195 | 0.361  |
| FSNAEPEPR                          | 1047.1             | 2            | 2.622  | 0.172  |
| FSPAGPVLSIR                        | 1144.3             | 2            | 2.511  | 0.1688 |
| FSPDGELYASGSEDGTLR                 | 1902.0             | 2            | 3.9854 | 0.3734 |
| FSPDGNRFATASADGQIYIDGK             | 2494.7             | 3            | 4.2896 | 0.4626 |
| FSPDLWGVSVCTVDGQR                  | 1867.1             | 2            | 2.4152 | 0.2386 |
| FSPGAPGGSGSQPNQK                   | 1516.6             | 2            | 2.6252 | 0.2778 |
| FSPLTTNLINLLAENGR                  | 1874.1             | 2            | 5.3105 | 0.3362 |
| FSPPILQLDEVDFYYDPK                 | 2187.4             | 2            | 3.0542 | 0.2501 |
| FSQLYPER                           | 1040.2             | 2            | 2.4831 | 0.1247 |
| FSQMLHPIFEEASDVIKEEFPNENQVVFAR     | 3553.0             | 3            | 6.5663 | 0.5049 |

| Peptide Sequence                             | Peptide mass (m/z) | Charge State | Xcorr  | DelCn2 |
|----------------------------------------------|--------------------|--------------|--------|--------|
| FSQQQSFVQILQEVNDFAGQR                        | 2470.7             | 3            | 4.5701 | 0.3338 |
| FSSAPLIPLPTPIIPVLPQQFVPPTNVR                 | 3137.7             | 3            | 4.2633 | 0.2462 |
| FSSASGASARINSSSVK                            | 1656.8             | 2            | 2.978  | 0.1424 |
| FSSQQAATK                                    | 968.0              | 2            | 2.538  | 0.1285 |
| FSSSTEQSSASR                                 | 1274.3             | 2            | 2.9829 | 0.249  |
| FSTEHRTELLTEALR                              | 1804.0             | 3            | 3.8061 | 0.2685 |
| FSTETTFVLVDKYEIL                             | 1807.0             | 2            | 2.4966 | 0.1604 |
| FSTEYELQQLEQFKK                              | 1919.1             | 2            | 2.8124 | 0.1551 |
| FSTEYELQQLEQFKKDNEETGFGSGTR                  | 3170.3             | 3            | 5.6168 | 0.4097 |
| FSTGGDKPAIWL DAGIHAR                         | 2013.2             | 2            | 3.622  | 0.1735 |
| FSTSGLSISGLNPLPNPSYLLPPR                     | 2528.9             | 3            | 3.9051 | 0.3684 |
| FSTYTSKD DENKLSEASGGR                        | 2193.3             | 3            | 4.3691 | 0.2953 |
| FSVCLVLDGQQHCDEAKAVDIPHMDIEALK               | 3213.7             | 3            | 5.5047 | 0.3676 |
| FSVCLVLDGQQHCDEAKAVDIPHMDIEALKK              | 3341.8             | 3            | 4.8643 | 0.1908 |
| FSVLLH GIR                                   | 1155.4             | 2            | 3.7371 | 0.3739 |
| FSVSGAKGEETGIDVTLPTGEVTVPGVSGDVSLPEIATGGLEGK | 4259.7             | 3            | 4.508  | 0.3414 |
| FSVSPVVR                                     | 891.0              | 1            | 1.7066 | 0.2464 |
| FTANVG IQIVGDDLTVTNPK                        | 2103.4             | 2            | 4.5824 | 0.3383 |
| FTASAGIQVVGDDLTVTNPK                         | 2034.3             | 2            | 5.7996 | 0.4823 |
| FTASAGIQVVGDDLTVTNPKR                        | 2190.4             | 3            | 5.1204 | 0.5395 |
| FTDDDKTDHLSWEWNLTIK                          | 2365.5             | 3            | 5.0535 | 0.4001 |
| FTDEEVDELYR                                  | 1416.5             | 2            | 4.4584 | 0.3851 |
| FTDEYQLFEELGK                                | 1619.8             | 2            | 4.3895 | 0.4294 |
| FTDEYQLFEELGKGAFSVVR                         | 2336.6             | 3            | 4.6102 | 0.2856 |
| FTDEYQLFEELGKGAFSVVRR                        | 2492.8             | 3            | 3.645  | 0.1077 |
| FTDFDEVRQEIEAETDRVTGTNK                      | 2701.8             | 3            | 3.6676 | 0.2816 |
| FTDLKHYSDELQSVISHLLR                         | 2402.7             | 3            | 3.7102 | 0.299  |
| FTEDAKR                                      | 866.9              | 1            | 1.9244 | 0.1366 |
| FTELKAQLSTILEEEKAQQEER                       | 2621.9             | 3            | 4.7392 | 0.4009 |
| FTEYETQVK                                    | 1145.2             | 2            | 3.0142 | 0.2556 |
| FTFGLDWVPK                                   | 1210.4             | 2            | 2.8048 | 0.3058 |
| FTFRPPNNEK                                   | 1250.4             | 2            | 2.6291 | 0.1959 |
| FTGLSKEELLK                                  | 1265.5             | 2            | 3.2289 | 0.2698 |
| FTHSEKFTFHLEPQAQATQVSDVPATSR                 | 3161.4             | 3            | 4.9438 | 0.3025 |
| FTHVLTAGGIGPTHDDVTFEAVAQAFGDELKPHPK          | 3705.1             | 3            | 4.5298 | 0.2202 |
| FTIDSDAVSASSPEK                              | 1554.6             | 2            | 2.5758 | 0.1196 |

| Peptide Sequence                    | Peptide mass (m/z) | Charge State | Xcorr  | DelCn2 |
|-------------------------------------|--------------------|--------------|--------|--------|
| FTIGDHSR                            | 933.0              | 2            | 2.4831 | 0.196  |
| FTITPSTTQVVGILK                     | 1605.9             | 2            | 3.1777 | 0.3898 |
| FTLGSVAGAVGATAVYPIDLVK              | 2150.5             | 2            | 5.7511 | 0.5472 |
| FTLTEKLEHR                          | 1274.5             | 2            | 2.9521 | 0.2885 |
| FTMELAKK                            | 968.2              | 2            | 2.488  | 0.1194 |
| FTMVQVWPVR                          | 1263.5             | 2            | 3.3742 | 0.2204 |
| FTNEDHLAVHK                         | 1311.4             | 2            | 3.3508 | 0.2817 |
| FTNLLTSILDSAETKN                    | 1768.0             | 2            | 5.2002 | 0.3452 |
| FTPGTFTNQIQAAGR                     | 1699.9             | 2            | 4.5116 | 0.4349 |
| FTPSLDSDFTFTLPAGQK                  | 1973.2             | 2            | 5.1169 | 0.4368 |
| FTQAGSEVSALLGR                      | 1436.6             | 2            | 5.0799 | 0.3519 |
| FTQAGSEVSALLGRIPSAVGYQPTLATDMGTMQER | 3685.1             | 3            | 8.0005 | 0.5918 |
| FTQDTQPHYIYSPR                      | 1753.9             | 2            | 4.422  | 0.4666 |
| FTQHQNNTVK                          | 1103.2             | 2            | 2.5546 | 0.2854 |
| FTQISPVWLQLK                        | 1460.7             | 2            | 3.2499 | 0.266  |
| FTQNMMMPHIIHYPNEVIVK                | 2306.8             | 3            | 3.6351 | 0.1166 |
| FTRNEFNLESK                         | 1385.5             | 2            | 3.2582 | 0.2115 |
| FTRPEHLGSSAK                        | 1330.5             | 2            | 2.9023 | 0.2967 |
| FTSGKYQDVYVELSHIK                   | 2015.3             | 3            | 3.7366 | 0.2015 |
| FTSLDKGENGTLSR                      | 1525.6             | 2            | 3.4795 | 0.3209 |
| FTTDLDSR                            | 1052.1             | 2            | 2.5363 | 0.2589 |
| FTVLLMPNGPMR                        | 1376.7             | 2            | 3.2777 | 0.1759 |
| FTVTFESDKFKVK                       | 1576.8             | 2            | 3.7741 | 0.3474 |
| FTYRSDSFENPVLQQHFR                  | 2272.5             | 3            | 5.1437 | 0.3518 |
| FVADGIFK                            | 897.1              | 2            | 2.4924 | 0.1677 |
| FVADGIFKAELNEFLTR                   | 1971.2             | 3            | 5.6807 | 0.4324 |
| FVAFSGEGQSLR                        | 1298.4             | 2            | 3.4006 | 0.2799 |
| FVAKENEVQSLHSK                      | 1616.8             | 2            | 4.3982 | 0.4568 |
| FVAKENEVQSLHSKLTDTLVSK              | 2474.8             | 3            | 3.4927 | 0.2334 |
| FVASKNEQESR                         | 1295.4             | 2            | 2.8084 | 0.3046 |
| FVATQAAVPPAEELAFDTSLITR             | 2448.8             | 3            | 3.4488 | 0.1098 |
| FVDGEWYR                            | 1072.2             | 2            | 2.9187 | 0.2157 |
| FVDGLMIHSGDPVNYVDTAVR               | 2469.8             | 2            | 2.7833 | 0.1714 |
| FVDHVFDEQVIDSLTVK                   | 1992.2             | 2            | 5.4351 | 0.4283 |
| FVDKLYTGLIQGQR                      | 1638.9             | 2            | 3.6776 | 0.3458 |
| FVDLYGAQK                           | 1041.2             | 2            | 3.0361 | 0.2472 |

| Peptide Sequence           | Peptide mass (m/z) | Charge State | Xcorr  | DelCn2 |
|----------------------------|--------------------|--------------|--------|--------|
| FVEDTKKGVHQQ               | 1416.6             | 2            | 3.66   | 0.3309 |
| FVEFFGPGVAQLSIADR          | 1854.1             | 2            | 5.2694 | 0.4767 |
| FVEGLPINDFSR               | 1394.6             | 2            | 3.5709 | 0.4345 |
| FVEKPQVFVSNK               | 1422.7             | 2            | 2.4005 | 0.1784 |
| FVEKYTELQKLGETDEEKLFVETGK  | 2962.3             | 3            | 4.9731 | 0.2951 |
| FVETSPSGLDPNASVYQPLK       | 2150.4             | 3            | 4.3559 | 0.3286 |
| FVFSLV DAMNGK              | 1328.6             | 2            | 4.2978 | 0.4116 |
| FVFWKILKTK                 | 1310.7             | 2            | 2.9065 | 0.1386 |
| FVGGAENTAHR                | 1256.4             | 2            | 3.1172 | 0.3582 |
| FVGGSGQVSR                 | 1123.2             | 2            | 2.6588 | 0.2589 |
| FVGIKDEDQLEAFLKK           | 1881.2             | 3            | 4.6758 | 0.3798 |
| FVHFIDAPSLALIMPIVQR        | 2168.6             | 3            | 5.2797 | 0.2216 |
| FVHSENQHLSPEALDFLDK        | 2326.5             | 3            | 5.5501 | 0.4664 |
| FVHSENQHLSPEALDFLDKLLR     | 2709.1             | 3            | 4.761  | 0.3505 |
| FVHTSVHGVGHSFVQSAFK        | 2072.3             | 2            | 5.258  | 0.6032 |
| FVIATSTK                   | 867.0              | 1            | 2.1155 | 0.1894 |
| FVIGGPQG DAGLTGR           | 1445.6             | 2            | 3.676  | 0.2072 |
| FVIGGPQG DAGLTGRK          | 1573.8             | 2            | 3.957  | 0.3096 |
| FVIHCNSPVWGADK             | 1573.8             | 2            | 2.5829 | 0.1178 |
| FVIHCNSPVWGADKCEELLEK      | 2418.8             | 3            | 3.4254 | 0.2165 |
| FVIKPIDKK                  | 1088.4             | 2            | 2.4407 | 0.2634 |
| FVIKPIDKKAPDFVFYAPR        | 2252.7             | 3            | 4.5664 | 0.2897 |
| FVIKRPELLTHSTTEVTQPR       | 2353.7             | 3            | 5.3731 | 0.4663 |
| FVINYDYPNSSEYVHR           | 2119.2             | 2            | 3.3092 | 0.4167 |
| FVIPDFMSFTSHIDELYESAK      | 2477.8             | 2            | 4.1522 | 0.4227 |
| FVIPDFMSFTSHIDELYESAKK     | 2605.9             | 2            | 3.267  | 0.3024 |
| FVKKPDDGKMK                | 1293.6             | 2            | 2.4069 | 0.144  |
| FVLCPECENPETDLHVNPK        | 2185.5             | 2            | 4.6524 | 0.3147 |
| FVLINWTGEGVNDVR            | 1719.9             | 2            | 4.3131 | 0.373  |
| FVLKNYGENPEAYNEELKKLELLR   | 2911.3             | 3            | 3.9039 | 0.2857 |
| FVLPAVLNPR                 | 1126.4             | 2            | 2.6269 | 0.2098 |
| FVLQDGAHHMVDSNEISFIR       | 2316.6             | 3            | 4.6253 | 0.459  |
| FVLSSGK                    | 737.9              | 1            | 1.8148 | 0.155  |
| FVLSSGK FYGDEEKDKGLQTSQDAR | 2807.0             | 3            | 5.9796 | 0.2733 |
| FVLVKFDTQYPYGEKQDEFKR      | 2639.0             | 3            | 3.9392 | 0.2938 |
| FVMQEEFSR                  | 1173.3             | 1            | 2.9563 | 0.291  |

| Peptide Sequence                        | Peptide mass (m/z) | Charge State | Xcorr  | DelCn2 |
|-----------------------------------------|--------------------|--------------|--------|--------|
| FVMQEEFSRDGK                            | 1473.6             | 2            | 2.7598 | 0.2622 |
| FVNLGIEPPKGVLLFGPPGTGK                  | 2238.7             | 2            | 5.0174 | 0.4387 |
| FVNQHLCGSHLVEALYLVCGER                  | 2488.9             | 3            | 5.6658 | 0.5011 |
| FVNQLKGESR                              | 1178.3             | 2            | 2.5185 | 0.1786 |
| FVNVVPTFGK                              | 1108.3             | 2            | 2.7335 | 0.1955 |
| FVPFAAVAAANCINIPLMR                     | 2019.5             | 3            | 3.6532 | 0.2424 |
| FVQIKEMVPEFVVPDLTGFK                    | 2324.8             | 2            | 3.6463 | 0.3538 |
| FVQLQHGEIDKR                            | 1470.7             | 2            | 3.817  | 0.2914 |
| FVRNPLGSTHPEATLK                        | 1768.0             | 2            | 3.6845 | 0.2766 |
| FVSAIEGMHPNQEDHETFDINPLTGIIK            | 3366.8             | 3            | 7.4649 | 0.461  |
| FVSEHYDENEDDLVSHVDGSVISR                | 2864.9             | 3            | 5.6766 | 0.3232 |
| FVSISDLLVPK                             | 1218.5             | 2            | 3.6879 | 0.3676 |
| FVSISDLLVPKDLGTESQIFISR                 | 2565.9             | 3            | 5.155  | 0.4308 |
| FVSKEMENMYIEELKSSVNULLMANLESMPVSK       | 3693.3             | 3            | 5.7609 | 0.4845 |
| FVSLEGFAQPVAIFLGIPFAKPPLGPLR            | 2983.6             | 3            | 4.1982 | 0.343  |
| FVSSSSSGAYGGGYGGVLTASDGLLAGNEK          | 2810.0             | 2            | 6.2216 | 0.5211 |
| FVSSSSSGAYGGGYGGVLTASDGLLAGNEKLTMQNLNDR | 3896.2             | 3            | 6.0048 | 0.4999 |
| FVSSSSSGGYGGGYGGVLTASDGLLAGNEK          | 2796.0             | 2            | 5.7431 | 0.4929 |
| FVSSSSSGGYGGGYGGVLTASDGLLAGNEKLTMQNLNDR | 3882.2             | 3            | 4.3535 | 0.3313 |
| FVTDIDELGKDLLLK                         | 1720.0             | 2            | 3.3311 | 0.2334 |
| FVTSNTQELGKDK                           | 1467.6             | 2            | 3.4643 | 0.3115 |
| FVTTEFEPCFDAADFIR                       | 2009.2             | 2            | 4.3807 | 0.4613 |
| FVTVQTISGTGALR                          | 1450.7             | 2            | 4.5179 | 0.3805 |
| FVVDLSDQVAPTDIEEGMR                     | 2122.3             | 2            | 5.6501 | 0.5072 |
| FVVEKAEQQK                              | 1206.4             | 2            | 2.4607 | 0.1253 |
| FVVEKAEQQKK                             | 1334.5             | 2            | 3.3296 | 0.1855 |
| FVVQNVSAQKDGEK                          | 1549.7             | 2            | 3.9074 | 0.386  |
| FVWNGHLLR                               | 1142.3             | 2            | 2.5928 | 0.2205 |
| FVYKEEHPFEK                             | 1453.6             | 2            | 3.767  | 0.2886 |
| FWAHEHWGLDDPADVMTFSK                    | 2390.6             | 3            | 5.274  | 0.4421 |
| FWANFAR                                 | 912.0              | 2            | 2.6114 | 0.234  |
| FWEGDFHRDMEALNVLPDVLTR                  | 2759.1             | 3            | 3.209  | 0.1654 |
| FWEVISDEHGIDPAGGYVGDSALQLER             | 2962.2             | 3            | 5.3937 | 0.3192 |
| FWEVISDEHGIDPSGNYVGSDQLQLER             | 3079.2             | 3            | 6.499  | 0.4819 |
| FWEVISDEHGIDPTGSYHGSDQLQLER             | 3104.2             | 3            | 5.2574 | 0.2166 |
| FWEVISDEHGIDPTGTYHGSDQLQLDR             | 3104.2             | 3            | 6.3383 | 0.407  |

| Peptide Sequence           | Peptide mass (m/z) | Charge State | Xcorr  | DelCn2 |
|----------------------------|--------------------|--------------|--------|--------|
| FWEVISDEHGIDPTGTYHGDSLQLER | 3118.3             | 3            | 5.7792 | 0.4704 |
| FWKEHHFEAIALVEK            | 1885.2             | 3            | 4.0298 | 0.3193 |
| FYALRPDRDIELTLR            | 1879.2             | 2            | 2.5735 | 0.1651 |
| FYALSASFEPFSNK             | 1608.8             | 2            | 5.2483 | 0.4661 |
| FYAYNPLAGGLLTGK            | 1585.8             | 2            | 4.3606 | 0.4619 |
| FYCDYCDTYLTHDSPSVR         | 2186.4             | 2            | 4.0236 | 0.29   |
| FYDANYDGKEYDPVEAR          | 2053.1             | 3            | 3.3992 | 0.2499 |
| FYDDAIVSQK                 | 1186.3             | 2            | 3.257  | 0.2135 |
| FYDLSSKYYQTIGNHASYYKDALR   | 2905.2             | 3            | 5.904  | 0.455  |
| FYDSKETVNNQK               | 1473.6             | 2            | 2.9715 | 0.2038 |
| FYEDNGQLDDAR               | 1443.5             | 2            | 3.4171 | 0.3931 |
| FYEEEEENGWVWEGFGDFSPTDVHR  | 2804.9             | 3            | 4.3525 | 0.3412 |
| FYEEVHDLER                 | 1337.4             | 2            | 2.4146 | 0.1504 |
| FYEEVHDLERK                | 1465.6             | 2            | 4.3337 | 0.3726 |
| FYEQFSK                    | 949.0              | 2            | 2.8214 | 0.1701 |
| FYEQMNGPVAGASR             | 1527.7             | 2            | 4.7065 | 0.4912 |
| FYFDPKQTDVLQQLSIQMANAK     | 2586.9             | 3            | 4.6179 | 0.2282 |
| FYFENLLAK                  | 1145.3             | 2            | 3.1041 | 0.2853 |
| FYFVGDEDLLEIIGNSK          | 1960.2             | 2            | 4.8524 | 0.4487 |
| FYGDEEKDK                  | 1131.2             | 2            | 2.5418 | 0.2508 |
| FYGDEEKDKGLQTSQDAR         | 2088.2             | 2            | 6.0946 | 0.4913 |
| FYGPAGPYGIFAGR             | 1473.7             | 2            | 4.7641 | 0.5402 |
| FYGPEGPYGVFAGR             | 1517.7             | 2            | 3.4495 | 0.5001 |
| FYHDWNDKEIEVLNK            | 1951.1             | 3            | 3.8031 | 0.2376 |
| FYIDPYKLLPLQR              | 1667.0             | 2            | 3.5229 | 0.3103 |
| FYKELQAHGADELLKR           | 1919.2             | 2            | 4.1446 | 0.3543 |
| FYKENLGQGWMTQK             | 1731.0             | 2            | 3.9665 | 0.3788 |
| FYNELTEILVR                | 1397.6             | 2            | 4.2132 | 0.3508 |
| FYPEDVAEELIQDITQK          | 2039.2             | 3            | 5.8666 | 0.4359 |
| FYPEDVSEELIQDITQR          | 2083.2             | 3            | 4.2876 | 0.3809 |
| FYQAEMEELDFISAVEK          | 2050.3             | 2            | 4.6781 | 0.2843 |
| FYQDLKDR                   | 1085.2             | 2            | 2.4599 | 0.2084 |
| FYQDLKDRDVTFSPATIENELIK    | 2744.0             | 3            | 5.1606 | 0.3712 |
| FYREASSGAAK                | 1187.3             | 2            | 3.039  | 0.1576 |
| FYSFLVLKK                  | 1145.4             | 2            | 2.6012 | 0.1235 |
| FYSVNVDSK                  | 1222.3             | 2            | 2.6374 | 0.21   |



| Peptide Sequence                 | Peptide mass (m/z) | Charge State | Xcorr  | DelCn2 |
|----------------------------------|--------------------|--------------|--------|--------|
| FYTDPSTYFFDLWK                   | 1729.9             | 2            | 2.928  | 0.2348 |
| FYTLIPHDFGMK                     | 1469.7             | 2            | 3.4833 | 0.2269 |
| FYVHNDIFR                        | 1211.4             | 2            | 2.7475 | 0.3182 |
| FYVHNDMFR                        | 1229.4             | 2            | 2.4314 | 0.2694 |
| FYVPPTQEDGVDPVEAFAQNVLSK         | 2651.9             | 3            | 5.6638 | 0.4583 |
| FYWGHKEILIPVK                    | 1778.1             | 3            | 3.2595 | 0.2272 |
| GAAAAHGSESSPGLETGAALGAGGATCVPLLR | 2851.1             | 3            | 3.3931 | 0.1    |
| GAAAEAAGILQDAVSKLDDPLHLR         | 2432.7             | 3            | 5.5568 | 0.4546 |
| GAAAHDPDSEEQQR                   | 1524.5             | 2            | 4.0904 | 0.3813 |
| GAAAQGQTQTVAAQAQALAAQAAAAAHAAQHR | 3083.3             | 3            | 5.7171 | 0.4366 |
| GAAASPEPAR                       | 927.0              | 2            | 2.5223 | 0.2155 |
| GAAATTTTTEHR                     | 1217.3             | 2            | 2.8838 | 0.3037 |
| GAADVEKVEEK                      | 1175.3             | 2            | 3.0607 | 0.1966 |
| GAAEPEAQLSNHLAEEGPAEGSGEARR      | 2649.7             | 3            | 5.3275 | 0.2279 |
| GAAGALLVYDITRR                   | 1476.7             | 2            | 2.4572 | 0.2682 |
| GAAGALMVYDITRR                   | 1494.7             | 2            | 2.9142 | 0.3176 |
| GAAGGAEQPGPGGR                   | 1182.2             | 2            | 3.8686 | 0.2584 |
| GAANHDLTDTR                      | 1272.3             | 2            | 2.8125 | 0.3999 |
| GAAPPKQEFLDIEDP                  | 1627.8             | 2            | 3.188  | 0.2    |
| GAAPYVQAFDSLLAGPVAEYLK           | 2281.6             | 2            | 5.2908 | 0.5059 |
| GAASGVVVELAR                     | 1087.2             | 2            | 2.9869 | 0.2013 |
| GAAVDGGKLDVGNAEVKLEENR           | 2371.5             | 3            | 6.1572 | 0.4916 |
| GAAVDGGKLDVGNAEVKLEENRSLKADLQK   | 3255.6             | 3            | 5.3127 | 0.3648 |
| GAAYAHAEESIKK                    | 1375.5             | 2            | 2.9178 | 0.2656 |
| GADCCVLVFDVTAPNTFK               | 1901.2             | 2            | 3.7624 | 0.3197 |
| GADFLVTEVENGGSLGSK               | 1780.9             | 2            | 6.582  | 0.4376 |
| GADFLVTEVENGGSLGSKK              | 1909.1             | 2            | 5.4218 | 0.4075 |
| GADINAPDKHHITPLLSAVYEGHVSCVK     | 2973.4             | 3            | 6.3401 | 0.4966 |
| GADKTVKGPDLTAFEATDNQAIK          | 2448.7             | 3            | 4.9752 | 0.3442 |
| GADKVNTFSALLLEPYKPPSAQ           | 2347.7             | 2            | 4.7997 | 0.2931 |
| GADMSVPDEKGNPPLWLALANNLEDIASTLVR | 3408.8             | 3            | 4.6584 | 0.2951 |
| GADPGMPEPTVLSLLWG                | 1741.0             | 2            | 2.501  | 0.2179 |
| GAEAAANVTGPDGVPVEGSR             | 1783.9             | 2            | 4.9031 | 0.4352 |
| GAEAAANVTGPGGVPVQGSK             | 1696.8             | 2            | 5.3283 | 0.2593 |
| GAEADQIIIEYLK                    | 1350.5             | 2            | 3.6291 | 0.2963 |
| GAEADQIIIEYLKQVSLLK              | 2147.5             | 2            | 5.6793 | 0.3683 |

| Peptide Sequence                     | Peptide mass (m/z) | Charge State | Xcorr  | DelCn2 |
|--------------------------------------|--------------------|--------------|--------|--------|
| GAEADQIIEYLKQQVSLLEK                 | 2404.7             | 3            | 4.1154 | 0.2582 |
| GAEEMETVIPVDVMR                      | 1676.9             | 2            | 4.7391 | 0.346  |
| GAEHITTYTFNTHK                       | 1620.7             | 2            | 3.7963 | 0.3825 |
| GAEIEYAMAYSK                         | 1333.5             | 2            | 3.5437 | 0.331  |
| GAEILADTFKDYAVSTVPVADGLHLK           | 2732.1             | 3            | 5.127  | 0.4656 |
| GAEILEVLHSLPAVR                      | 1604.9             | 2            | 3.9193 | 0.2795 |
| GAEIVADTFRDFAVSTVPVSGPSHLR           | 2730.0             | 3            | 4.9105 | 0.2894 |
| GAELEYESLKRQELESENK                  | 2381.6             | 3            | 3.2071 | 0.1314 |
| GAEVNQVKEQLLQSNPVLEAFGNAK            | 2685.0             | 3            | 6.6565 | 0.449  |
| GAFGEATLYR                           | 1085.2             | 2            | 2.6721 | 0.2115 |
| GAFGKPQGTVAR                         | 1189.3             | 2            | 2.9239 | 0.1528 |
| GAFHRPVLGGFR                         | 1314.5             | 2            | 2.4475 | 0.1589 |
| GAFPPVWNPIAYLDYNNLWR                 | 2407.7             | 2            | 4.5394 | 0.4465 |
| GAFSRLDPTGTFEKEMIGR                  | 2113.4             | 3            | 3.9983 | 0.1068 |
| GAFTFQGSMDMPLK                       | 1757.1             | 2            | 3.6647 | 0.3634 |
| GAGAESSHPVR                          | 1068.1             | 2            | 3.2017 | 0.2515 |
| GAGAFGYFEVTHDITK                     | 1713.9             | 2            | 3.573  | 0.3643 |
| GAGALLQHGLVNFTFNK                    | 1788.0             | 2            | 4.3237 | 0.4625 |
| GAGATGKDTMGDLPRDPGHVVEQLSR           | 2665.9             | 3            | 4.2802 | 0.339  |
| GAGATLEHQQEISK                       | 1469.6             | 2            | 4.0752 | 0.291  |
| GAGAVIHTHSK                          | 1078.2             | 2            | 3.7552 | 0.3767 |
| GAGGALFVHRDTPENNPDTPFDFTPENYKR       | 3364.6             | 3            | 5.5492 | 0.407  |
| GAGGEENKENERPSAGSK                   | 1817.9             | 2            | 3.9976 | 0.4148 |
| GAGGQKLDVTILSPSRK                    | 1785.0             | 3            | 4.2166 | 0.2603 |
| GAGHMPVTDKPLAAFTMFSR                 | 2135.5             | 3            | 4.7885 | 0.4276 |
| GAGIGGLGITVEGPSEK                    | 1629.8             | 2            | 4.7281 | 0.4875 |
| GAGKAPLNVQFNSPLPGDAVK                | 2081.4             | 3            | 3.6451 | 0.1686 |
| GAGKAPLNVQFNSPLPGDAVKDLDIIDNYDYSHTVK | 3874.3             | 3            | 5.0733 | 0.3253 |
| GAGTDDHTLIR                          | 1156.2             | 2            | 3.2862 | 0.1784 |
| GAGTDDSTLVR                          | 1092.1             | 2            | 3.1736 | 0.2975 |
| GAGTDEKTLTR                          | 1149.2             | 2            | 3.7675 | 0.3085 |
| GAGTGGLGLAVEGPSEAK                   | 1571.7             | 2            | 4.7624 | 0.3989 |
| GAGTNEDALIEILTTR                     | 1674.8             | 2            | 5.2391 | 0.3682 |
| GAGTNEKVLTEIIASR                     | 1659.9             | 2            | 3.7098 | 0.3062 |
| GAGYTFGQDISETFNHANGTLVSR             | 2656.8             | 2            | 4.7981 | 0.471  |
| GAHLTALEMLTAFASHIR                   | 1940.3             | 2            | 6.2764 | 0.5712 |

| Peptide Sequence                      | Peptide mass (m/z) | Charge State | Xcorr  | DelCn2 |
|---------------------------------------|--------------------|--------------|--------|--------|
| GAHNGQQLGNAFLSHISACDGIFHLTR           | 2795.1             | 3            | 5.0706 | 0.3837 |
| GAHPSGGADDVAK                         | 1182.2             | 2            | 3.1758 | 0.3092 |
| GAHSVGLMWWMLAR                        | 1616.0             | 2            | 4.528  | 0.4586 |
| GAIETYQEVASLPDVPADLLK                 | 2230.5             | 2            | 4.7898 | 0.4506 |
| GAILTGPPGTGK                          | 1069.2             | 2            | 2.5669 | 0.1769 |
| GAIQFVTHYQHSSTQR                      | 1861.0             | 2            | 4.4905 | 0.3921 |
| GAIREYQTQLIQR                         | 1576.8             | 2            | 3.646  | 0.3607 |
| GAIVHYTILNNHVYR                       | 1771.0             | 2            | 4.3322 | 0.4622 |
| GAKAEEILEK                            | 1088.2             | 1            | 2.4881 | 0.1118 |
| GAKEEHGGLIR                           | 1167.3             | 2            | 3.1469 | 0.2299 |
| GAKEGIILFK                            | 1076.3             | 2            | 2.7331 | 0.1848 |
| GAKEHGAVAVER                          | 1224.4             | 2            | 2.5204 | 0.2834 |
| GAKPHFITSSVEHDSIR                     | 1882.1             | 2            | 4.2974 | 0.4169 |
| GAKWTTAPKPTMADELYNQDYPIHSVEDR         | 3335.6             | 3            | 5.7511 | 0.4315 |
| GALALAQAVQR                           | 1098.3             | 2            | 2.583  | 0.167  |
| GALEAYVQSVR                           | 1193.3             | 2            | 2.6191 | 0.1368 |
| GALFGANANR                            | 991.1              | 2            | 2.8321 | 0.2628 |
| GALFQA HAR                            | 971.1              | 2            | 2.4224 | 0.2707 |
| GALINVPPPFLGLPR                       | 1561.9             | 2            | 3.1696 | 0.2842 |
| GALLSSIELEELKAENEKLSSQITLLEAQR        | 3542.0             | 3            | 5.4575 | 0.411  |
| GALLVFAEHR                            | 1113.3             | 2            | 3.306  | 0.3169 |
| GALPLDVTIFYK                          | 1325.5             | 2            | 3.7181 | 0.3926 |
| GALPLDVTIFYKVIPK                      | 1763.1             | 2            | 4.543  | 0.3291 |
| GALQNIIPASTGAAK                       | 1412.6             | 2            | 4.2115 | 0.319  |
| GALQQGEAFQR                           | 1205.3             | 2            | 2.6446 | 0.1663 |
| GALQYLVPILTQTLTK                      | 1760.1             | 2            | 5.3324 | 0.389  |
| GALVLGSSLK                            | 945.1              | 2            | 2.5013 | 0.146  |
| GALVVVNDLGGDFK                        | 1404.6             | 2            | 4.2588 | 0.3888 |
| GALVVVNDLGGDFKGVGK                    | 1746.0             | 2            | 5.5408 | 0.497  |
| GAMAATYSALNR                          | 1226.4             | 2            | 3.5088 | 0.1507 |
| GAMAATYSALNSSKPTPQLKPIESSILAQR        | 3132.6             | 3            | 4.7659 | 0.3923 |
| GAMPPAPVPAGTPAPPGPATMMPDGTGLGLTPPTTER | 3454.0             | 3            | 3.8817 | 0.3757 |
| GAMSHALNFIK                           | 1189.4             | 2            | 2.8634 | 0.1879 |
| GANFLTQILLRPGASDLTGSFR                | 2335.6             | 3            | 4.0316 | 0.2399 |
| GANIQLLDLPGIIEGAAQGK                  | 1979.3             | 2            | 5.492  | 0.4599 |
| GANPGFHEAIGDVLALS SVSTPEHLHK          | 2698.0             | 3            | 5.6165 | 0.4582 |

| Peptide Sequence                | Peptide mass (m/z) | Charge State | Xcorr  | DelCn2 |
|---------------------------------|--------------------|--------------|--------|--------|
| GANPVEIR                        | 856.0              | 1            | 1.9218 | 0.2035 |
| GANQHATDEEGKDPLSIAVEAANADIVTLLR | 3220.5             | 3            | 5.13   | 0.3652 |
| GANVIAGVWLEEAGQK                | 1642.8             | 2            | 3.6865 | 0.2599 |
| GAPAAATAPAPTAHK                 | 1332.5             | 2            | 4.2807 | 0.4182 |
| GAPGQPGTILR                     | 1067.2             | 2            | 2.4612 | 0.1184 |
| GAPLVKPLPVNPTDPAVTGPDIFAK       | 2515.9             | 3            | 3.8958 | 0.1553 |
| GAPPKIPGGATLVFEVELLK            | 2037.4             | 3            | 4.6663 | 0.3022 |
| GAPPSSNIEDFHGLLPK               | 1780.0             | 2            | 3.8406 | 0.4817 |
| GAPQHYPK                        | 898.0              | 2            | 2.5827 | 0.1667 |
| GAPVGGHILSYLLEK                 | 1554.8             | 2            | 4.5809 | 0.3883 |
| GAQAAIVVYDITNEESFAR             | 2055.2             | 2            | 2.5632 | 0.1514 |
| GAQAAIVVYDITNTDTFAR             | 2027.2             | 2            | 4.7037 | 0.4481 |
| GAQATLSSTTK                     | 1065.2             | 2            | 3.3471 | 0.3407 |
| GAQGVILVYDVTR                   | 1391.6             | 2            | 2.9478 | 0.214  |
| GAQVEEIWSLEPENFEK               | 2006.2             | 2            | 3.326  | 0.2116 |
| GASGAGGPGGAAR                   | 986.0              | 2            | 3.0097 | 0.1539 |
| GASGSFVVVQK                     | 1079.2             | 2            | 2.5463 | 0.1492 |
| GASGTREDPNLVPSISNK              | 1843.0             | 2            | 4.438  | 0.2785 |
| GASGTREDPNLVPSISNKR             | 1999.2             | 2            | 3.2881 | 0.2849 |
| GASIVEDK                        | 818.9              | 1            | 1.8696 | 0.1224 |
| GASIVEDKLVEDLR                  | 1544.7             | 2            | 3.7756 | 0.3646 |
| GASIVEDKLVEDLRTR                | 1802.0             | 3            | 3.7421 | 0.4032 |
| GASKEILSEVER                    | 1318.5             | 2            | 3.8024 | 0.2621 |
| GASNKYLVEFR                     | 1284.4             | 2            | 3.2172 | 0.2287 |
| GASQAGAPQGR                     | 1000.1             | 2            | 3.4419 | 0.24   |
| GASQAGMLAPGTR                   | 1217.4             | 2            | 3.1648 | 0.249  |
| GASQAGMTGYGMPR                  | 1384.6             | 2            | 4.1753 | 0.5039 |
| GASYILKLANRLYGEKTYNFLPEFLVSTQK  | 3466.0             | 3            | 4.6324 | 0.3255 |
| GATELTHEDYMEGILEVQAK            | 2235.5             | 3            | 4.2301 | 0.2032 |
| GATLKITLDNAYMEK                 | 1668.9             | 2            | 2.827  | 0.2002 |
| GATLSHYNIVNNSNILGER             | 2073.3             | 3            | 4.0877 | 0.2035 |
| GATPAPQAGEPSPGLGAR              | 1634.8             | 2            | 4.2639 | 0.4774 |
| GATQQILDEAER                    | 1331.4             | 2            | 4.0012 | 0.3219 |
| GATRPNGPNTGNK                   | 1284.4             | 2            | 2.7195 | 0.1742 |
| GATYGKPVHHGVNQLK                | 1706.9             | 3            | 3.2491 | 0.2517 |
| GAVAEDGDELRTPEAK                | 1787.9             | 2            | 4.1998 | 0.3571 |

| Peptide Sequence              | Peptide mass (m/z) | Charge State | Xcorr  | DelCn2 |
|-------------------------------|--------------------|--------------|--------|--------|
| GAVAEDGDELRTPEAKK             | 1916.0             | 3            | 3.2773 | 0.2744 |
| GAVASVTFDDFHK                 | 1394.5             | 2            | 3.618  | 0.2921 |
| GAVASVTFDDFHKNSAR             | 1823.0             | 2            | 4.5874 | 0.51   |
| GAVDAAVPTNIIAAK               | 1411.6             | 2            | 3.5064 | 0.2821 |
| GAVDALAAALAHISGASSFEPR        | 2112.3             | 3            | 5.3024 | 0.3948 |
| GAVDGGLSIPHSTK                | 1339.5             | 2            | 4.2895 | 0.3633 |
| GAVDGGLSIPHSTKR               | 1495.7             | 2            | 3.6635 | 0.3808 |
| GAVEALAAALAHISGATSVDQR        | 2109.3             | 3            | 4.9538 | 0.4768 |
| GAVGALLVYDIAK                 | 1290.5             | 2            | 4.7071 | 0.3608 |
| GAVHQLCQSLAGK                 | 1312.5             | 2            | 3.4348 | 0.2641 |
| GAVLHHLVNK                    | 1088.3             | 2            | 2.9818 | 0.1618 |
| GAVNMPFMDFLTEDGFEEKGPEELR     | 2731.1             | 2            | 4.3798 | 0.4343 |
| GAVPWYTINLDLPPYKR             | 2004.3             | 2            | 3.557  | 0.2113 |
| GAVQGAAGVK                    | 858.0              | 2            | 2.5284 | 0.1412 |
| GAVQSGVDKTK                   | 1090.2             | 2            | 2.8863 | 0.1842 |
| GAVSAEQVIAGFNR                | 1419.6             | 2            | 3.8632 | 0.3719 |
| GAVTGSVEKTK                   | 1077.2             | 2            | 2.7645 | 0.1936 |
| GAVWGATLNKDATK                | 1432.6             | 2            | 4.3333 | 0.3339 |
| GAVYSFDPVGSYQR                | 1546.7             | 2            | 3.1351 | 0.3474 |
| GAYGGGYGGYDDYGGYNDGYGFGSDR    | 2661.6             | 3            | 5.0395 | 0.2181 |
| GAYGGGYGGYDDYGGYNDGYGFGSDRFGR | 3022.0             | 3            | 4.8727 | 0.2666 |
| GAYGGGYGGYDDYNGYNDGYGFGSDRFGR | 3079.1             | 3            | 5.1382 | 0.3959 |
| GAYIYNALIEFIR                 | 1543.8             | 2            | 4.2445 | 0.3256 |
| GAYREHPYGR                    | 1206.3             | 2            | 2.553  | 0.182  |
| GAYTQVIFLAR                   | 1239.4             | 2            | 3.4242 | 0.2984 |
| GDAAVRDELMAAVR                | 1474.7             | 2            | 3.5956 | 0.3164 |
| GDADQASNILASFGLSAR            | 1793.9             | 2            | 5.51   | 0.5011 |
| GDAEKPEEELEEDDDEELDETLSEK     | 2922.9             | 3            | 3.5152 | 0.1866 |
| GDARPAEIDSLWEISK              | 1788.0             | 3            | 3.9444 | 0.2054 |
| GDASKEDIDTAMK                 | 1381.5             | 2            | 4.2815 | 0.3939 |
| GDATPEGEKATEK                 | 1333.4             | 2            | 2.6715 | 0.2058 |
| GDATPEGEKATEKENGDKSEAQKPSEK   | 2862.0             | 3            | 5.6845 | 0.3724 |
| GDATVSYEDPPTAK                | 1451.5             | 2            | 3.8027 | 0.3869 |
| GDDETLHKNNALK                 | 1455.6             | 2            | 3.5272 | 0.2071 |
| GDDLSTAILK                    | 1033.2             | 2            | 2.9219 | 0.1105 |
| GDDTPLHLAASHGHR               | 1584.7             | 2            | 4.4232 | 0.4857 |

| Peptide Sequence                       | Peptide mass (m/z) | Charge State | Xcorr  | DelCn2 |
|----------------------------------------|--------------------|--------------|--------|--------|
| GDEELDSLIIK                            | 1119.2             | 2            | 3.2885 | 0.2853 |
| GDEELDSLIIKATIAGGGVIPHIHK              | 2471.8             | 3            | 6.9827 | 0.4033 |
| GDELADSALEIFK                          | 1408.5             | 2            | 3.7789 | 0.2786 |
| GDFCIQVGR                              | 995.1              | 2            | 2.5679 | 0.2669 |
| GDDFFPPERPQQLPHGLGGIGMGLPGGGQPIDANHLNK | 3821.3             | 3            | 6.1589 | 0.4325 |
| GDFITIGSR                              | 966.1              | 2            | 2.4561 | 0.1111 |
| GDFLASLENDIKPAFGTNQEDYASYIMNGIIK       | 3536.9             | 3            | 5.9347 | 0.4447 |
| GDFNYLEEFK                             | 1262.3             | 2            | 2.9199 | 0.2637 |
| GDGPVQGIINFEQK                         | 1502.7             | 2            | 4.1451 | 0.3669 |
| GDGVVLVAPPLR                           | 1193.4             | 2            | 3.1438 | 0.3783 |
| GDGVVLVAPPLRVG                         | 1349.6             | 2            | 3.5482 | 0.1973 |
| GDHVWDGNSFDSK                          | 1464.5             | 2            | 3.7242 | 0.3896 |
| GDKAQIEKR                              | 1045.2             | 2            | 2.5572 | 0.1481 |
| GDKAQLEKR                              | 1045.2             | 2            | 2.6045 | 0.1181 |
| GDKEEVAYEER                            | 1325.4             | 2            | 2.8076 | 0.1684 |
| GDLEEYQDLLHTVFK                        | 1865.0             | 2            | 2.9232 | 0.1398 |
| GDLENAFLNLVQCIQNKPLYFADR               | 2783.2             | 3            | 4.3669 | 0.3748 |
| GDLGIEIPAEK                            | 1142.3             | 2            | 3.2694 | 0.3168 |
| GDLGIEIPAEKVFLAQK                      | 1829.1             | 2            | 4.677  | 0.4142 |
| GDLPFVVPR                              | 1000.2             | 2            | 3.0457 | 0.1945 |
| GDNITLLQSVSN                           | 1261.4             | 2            | 3.0117 | 0.1229 |
| GDNNEVDDR                              | 1034.0             | 2            | 2.7538 | 0.1338 |
| GDNPNKPMNPLITGVFGAIIAGAASVFGNTPLDVIK   | 3498.0             | 3            | 4.0251 | 0.2123 |
| GDNVAVIGEIDEETDSALDLGNIR               | 2516.7             | 2            | 4.4388 | 0.3315 |
| GDNVYEFHLEFLDLVKPEPVYK                 | 2653.0             | 3            | 3.737  | 0.2265 |
| GDDPAHAGLAELGHR                        | 1401.5             | 2            | 3.5293 | 0.3994 |
| GDPEEEEEEEEEELVDPLTTVR                 | 2445.5             | 2            | 5.4617 | 0.4327 |
| GDPEsprppalddafsilDLFLGR               | 2599.9             | 3            | 4.1212 | 0.2324 |
| GDPGDQTKAEGSSTASSGSQLAEGK              | 2366.4             | 3            | 3.3164 | 0.2966 |
| GDPSLLFVNAGMNQFKPIFLGTV DPR            | 2835.3             | 3            | 3.5335 | 0.2034 |
| GDRSEDFGVNEDLADSDAR                    | 2069.0             | 3            | 3.8247 | 0.2481 |
| GDSKKDDEENYLDLFSHK                     | 2141.2             | 3            | 4.8128 | 0.3225 |
| GDSPSPLPPPPPTSLQPGAPPAARAWPGER         | 3099.4             | 3            | 3.3258 | 0.2401 |
| GDSSIRYFEITDESPYVHYLNTFSSKEPQR         | 3567.8             | 3            | 4.799  | 0.3292 |
| GDSVIVVLRNPLIAGK                       | 1652.0             | 2            | 3.4782 | 0.1087 |
| GDTPGHATPGHGGATSSAR                    | 1734.8             | 3            | 3.3122 | 0.4255 |

| Peptide Sequence                         | Peptide mass (m/z) | Charge State | Xcorr  | DelCn2 |
|------------------------------------------|--------------------|--------------|--------|--------|
| GDTSGDYKK                                | 971.0              | 2            | 2.8537 | 0.2566 |
| GDTVDLAKK                                | 947.1              | 2            | 2.4783 | 0.1846 |
| GDTVLLK GK                               | 931.1              | 2            | 2.6389 | 0.1857 |
| GDVAEGDLIEHFSQFGTVEK                     | 2179.3             | 2            | 4.211  | 0.2776 |
| GDVCDLKVQVVMEEK                          | 1692.0             | 2            | 2.5013 | 0.1685 |
| GDVCQDCIQMVTDIQTAVR                      | 2096.4             | 2            | 5.6186 | 0.2538 |
| GDVDPFYDYETVR                            | 1739.8             | 2            | 4.1992 | 0.3513 |
| GDVFHVLDLHPGPGQSHAR                      | 2141.3             | 2            | 4.1011 | 0.37   |
| GDVGSADIQDLEK                            | 1347.4             | 2            | 4.2001 | 0.2752 |
| GDVQAQVGLGQLHLHGGR                       | 1843.0             | 2            | 3.9609 | 0.3562 |
| GDVSGVLIAGGENIILYDPSK                    | 2289.5             | 2            | 2.6745 | 0.1527 |
| GDVTAEEAAGASPAK                          | 1374.4             | 2            | 3.6009 | 0.2538 |
| GDVTAQIALQPALK                           | 1425.7             | 3            | 6.4123 | 0.3598 |
| GDVVNQDDLQALASGK                         | 1793.9             | 2            | 3.1625 | 0.2308 |
| GDVVPKDVNAIAIAIK                         | 1581.8             | 2            | 3.1012 | 0.333  |
| GDYPLEAVR                                | 1020.1             | 2            | 2.7697 | 0.2623 |
| GEAAAERPGEAAVASSPSK                      | 1785.9             | 2            | 4.6761 | 0.3885 |
| GEAAGAVQELAR                             | 1172.3             | 2            | 3.9665 | 0.3533 |
| GEAGAPGEEDIQGPTK                         | 1556.6             | 2            | 4.4434 | 0.4133 |
| GEAGAPGEEDIQGPTKADTEK                    | 2101.2             | 2            | 5.0693 | 0.4944 |
| GEAGVPAEFSIWTR                           | 1520.7             | 2            | 3.6531 | 0.2624 |
| GEALFKHKGGENYK                           | 1618.8             | 2            | 3.8935 | 0.3532 |
| GEALSALDSK                               | 991.1              | 2            | 3.3958 | 0.2227 |
| GEATVSFDDPPSAK                           | 1421.5             | 2            | 4.4421 | 0.4149 |
| GEDEEENLEVR                              | 1433.4             | 2            | 3.6877 | 0.3149 |
| GEDFPANNIVK                              | 1204.3             | 2            | 3.6336 | 0.2785 |
| GEDSSEKHLLEPGETQNAFLNER                  | 2746.8             | 3            | 4.0958 | 0.1734 |
| GEEAAGDRLIHEQDLEWLQQADVVAEVTQPSLGVGYELGR | 4536.9             | 3            | 4.777  | 0.3069 |
| GEEGHDPKEPEQLR                           | 1621.7             | 2            | 3.1199 | 0.2642 |
| GEEHCGHLIEAHK                            | 1460.6             | 2            | 3.3983 | 0.302  |
| GEEILSGAQR                               | 1060.1             | 2            | 3.7859 | 0.2539 |
| GEELGGQDPVQLLSGFPR                       | 1957.1             | 2            | 4.1607 | 0.3496 |
| GEESAVMLEPR                              | 1218.4             | 2            | 3.1756 | 0.1528 |
| GEFKDEEETVTTK                            | 1513.6             | 2            | 3.6081 | 0.3154 |
| GEFVTTVQQR                               | 1165.3             | 2            | 3.9654 | 0.283  |
| GEGERPAQNEK                              | 1215.3             | 2            | 3.168  | 0.2753 |

| Peptide Sequence                | Peptide mass (m/z) | Charge State | Xcorr  | DelCn2 |
|---------------------------------|--------------------|--------------|--------|--------|
| GEGGILINSQGER                   | 1330.4             | 2            | 3.696  | 0.2825 |
| GEGKDEEKYIDVVINK                | 1837.0             | 2            | 3.1248 | 0.2266 |
| GEGPEAGAGGAGGR                  | 1143.1             | 2            | 3.6142 | 0.3686 |
| GEGQLGPAER                      | 1014.1             | 2            | 3.2962 | 0.3059 |
| GEGYAKPNEGAIVEVALEGYKDK         | 2601.8             | 3            | 4.111  | 0.3075 |
| GEHPGLSIGDVAK                   | 1280.4             | 2            | 2.9479 | 0.3148 |
| GEHPGLSIGDVAKK                  | 1408.6             | 3            | 3.5173 | 0.4443 |
| GEHSIVYLKPSYAFGSVGK             | 2040.3             | 2            | 4.9551 | 0.4538 |
| GEHSIVYLKPSYAFGSVGKEK           | 2297.6             | 3            | 4.5308 | 0.2735 |
| GEHVHSLPEASVSSKPDEGRTEQSSQTR    | 3037.2             | 3            | 4.3576 | 0.3783 |
| GEKLDDLVS                       | 1104.2             | 2            | 3.4141 | 0.2199 |
| GEKSDEDKDKEGEALEVK              | 2007.1             | 3            | 5.8335 | 0.3025 |
| GELAIKDANAK                     | 1130.3             | 2            | 3.8967 | 0.3319 |
| GELAIKDANAKLSELEAALQR           | 2241.5             | 3            | 5.9385 | 0.4437 |
| GELFWDDGESLEVLER                | 1895.0             | 2            | 5.1138 | 0.4468 |
| GELLEAIKR                       | 1029.2             | 2            | 3      | 0.1384 |
| GELSGDFEK                       | 982.0              | 2            | 2.5855 | 0.2238 |
| GENHPHFEGGVK                    | 1308.4             | 2            | 2.7459 | 0.2092 |
| GENLEHLR                        | 968.0              | 2            | 2.5569 | 0.1558 |
| GEPAAAAPEAGASPVEK               | 1623.7             | 2            | 4.5522 | 0.4509 |
| GEPEKLGQALTEVYAK                | 1733.9             | 2            | 3.0997 | 0.1198 |
| GEQEHSQQKEEEEEMAVVPQGLFR        | 2816.0             | 3            | 5.6943 | 0.4811 |
| GERNFHVIFYQLLSGASELLNK          | 2552.8             | 3            | 3.2089 | 0.1257 |
| GESLGIKHEEAPGHRPTTNPASK         | 2528.7             | 3            | 3.6794 | 0.1789 |
| GESLSLPGSPPPDGTEQVIISR          | 2334.6             | 2            | 2.6687 | 0.3542 |
| GETGDDGRDGVGSEGR                | 1564.5             | 2            | 2.7759 | 0.203  |
| GETGPSGPVGPAGAVGPR              | 1563.7             | 2            | 3.4497 | 0.2995 |
| GETPRVEEVGPYTYR                 | 1753.9             | 2            | 4.203  | 0.3231 |
| GETSGRVDDNEETIKK                | 1778.9             | 2            | 3.7008 | 0.2444 |
| GEVLGDVQLQLETLKQEAATLAANNTQLQAR | 3196.6             | 3            | 3.5233 | 0.1351 |
| GEVQVSDKER                      | 1147.2             | 2            | 3.3045 | 0.1729 |
| GFAFISFHR                       | 1082.2             | 2            | 3.0148 | 0.2685 |
| GFAFVEFSHLQDATR                 | 1725.9             | 2            | 2.8979 | 0.3466 |
| GFAFVEYESHR                     | 1342.4             | 2            | 3.045  | 0.3041 |
| GFAFVQYVNER                     | 1330.5             | 2            | 4.6135 | 0.4024 |
| GFAFVTFDDHDSMDKIVIPK            | 2283.6             | 3            | 3.6505 | 0.3107 |



| Peptide Sequence                        | Peptide mass (m/z) | Charge State | Xcorr  | DelCn2 |
|-----------------------------------------|--------------------|--------------|--------|--------|
| GFAFVTFDDHDSVDK                         | 1700.8             | 2            | 4.7481 | 0.3637 |
| GFAFVTFDDHDSVDKIVIQK                    | 2282.5             | 2            | 4.715  | 0.4142 |
| GFAFVTFDDHDTVDKIVVQK                    | 2282.5             | 2            | 4.9363 | 0.3921 |
| GFAFVTFESPADAK                          | 1487.6             | 2            | 4.7501 | 0.3923 |
| GFAFVTFESPADAKDAAR                      | 1901.1             | 2            | 4.9163 | 0.4521 |
| GFAFVYFER                               | 1136.3             | 2            | 3.1521 | 0.3367 |
| GFALVGVGSEASSK                          | 1309.5             | 2            | 2.6181 | 0.1694 |
| GFALVGVGSEASSKK                         | 1437.6             | 2            | 3.3341 | 0.3011 |
| GFAYVQFEDVR                             | 1331.5             | 2            | 2.625  | 0.2639 |
| GFAYVQFEDVRDAEDALHNLDK                  | 2581.7             | 3            | 5.8034 | 0.4362 |
| GFAYVQFEDVRDAEDALHNLDK                  | 2709.9             | 3            | 5.0874 | 0.4346 |
| GFCFITFKEEEPVKK                         | 1803.1             | 2            | 4.4778 | 0.3975 |
| GFDEYMKELGVGIALRK                       | 1927.3             | 3            | 4.3184 | 0.3734 |
| GFDKAYVVLGQFLVLK                        | 1798.2             | 2            | 4.6703 | 0.4179 |
| GFDPLLNLVLDGTIEYMR                      | 2067.4             | 2            | 3.0262 | 0.1589 |
| GFDPLLNLVLDGTIEYMRDPDDQYK               | 2929.3             | 3            | 3.2133 | 0.2317 |
| GFDPLLNLVLDGTIEYMRDPDDQYKLTEDTR         | 3645.0             | 3            | 3.446  | 0.307  |
| GFDPSPPVHLETFQAMSYDLLPIENDVYKYETSGIGEAR | 4491.9             | 3            | 4.3753 | 0.3814 |
| GFEATLVQEAPIPAEPGALQER                  | 2324.6             | 3            | 3.4847 | 0.2038 |
| GFEDELSEVLENQSSQAELK                    | 2253.4             | 2            | 5.2265 | 0.4105 |
| GFELTFK                                 | 842.0              | 2            | 2.4376 | 0.119  |
| GFENVIHDKLPLQESEEEEEEREER               | 2814.0             | 3            | 4.0183 | 0.308  |
| GFESKVDAILNR                            | 1349.5             | 2            | 3.0911 | 0.2053 |
| GFESPSDNSSAMLLQWHEK                     | 2164.3             | 2            | 3.3959 | 0.282  |
| GFFDPNTEENLTYLQLK                       | 2030.2             | 2            | 4.9169 | 0.4102 |
| GFFDPNTHENLTYLQLLER                     | 2308.5             | 3            | 3.9478 | 0.2298 |
| GFFDPNTHENLTYR                          | 1711.8             | 2            | 3.0669 | 0.3323 |
| GFFEGTIASK                              | 1057.2             | 2            | 3.1618 | 0.3742 |
| GFFELFPSLSHNLLVD                        | 1836.1             | 2            | 2.8167 | 0.2863 |
| GFFIKPTVFGGVQDDMR                       | 1915.2             | 3            | 4.8119 | 0.4041 |
| GFFYTPK                                 | 860.0              | 1            | 2.2033 | 0.1972 |
| GFGDGYNGYGGGPGGGNFGGSPGYGGGR            | 2496.5             | 3            | 5.9411 | 0.4244 |
| GFGDHIHWR                               | 1125.2             | 2            | 3.2268 | 0.3306 |
| GFGDLKSPAGLQVLNDYLADK                   | 2222.5             | 2            | 5.0082 | 0.4959 |
| GFGFGLVKLDVK                            | 1280.5             | 2            | 2.4385 | 0.1726 |
| GFGFGQGAGALVHSE                         | 1434.5             | 2            | 4.0532 | 0.4846 |

| Peptide Sequence                        | Peptide mass (m/z) | Charge State | Xcorr  | DelCn2 |
|-----------------------------------------|--------------------|--------------|--------|--------|
| GFGFIKLESR                              | 1154.3             | 2            | 2.9312 | 0.188  |
| GFGFILFK                                | 929.1              | 2            | 3.2997 | 0.2227 |
| GFGFILFKDAASVEK                         | 1629.9             | 2            | 4.5001 | 0.4202 |
| GFGFITFTNPEHASVAMR                      | 1983.2             | 2            | 4.358  | 0.4359 |
| GFGFVDFNSEEDAK                          | 1562.6             | 2            | 4.4063 | 0.486  |
| GFGFVDFNSEEDAKAAK                       | 1832.9             | 2            | 4.1962 | 0.4366 |
| GFGFVLFK                                | 915.1              | 2            | 3.1014 | 0.2417 |
| GFGFVLFKDAASVDK                         | 1601.8             | 2            | 3.7551 | 0.4114 |
| GFGFVSEFER                              | 1046.2             | 2            | 3.1314 | 0.2533 |
| GFGFVSEFERHEDAQK                        | 1754.9             | 2            | 3.0603 | 0.2382 |
| GFGFVTFADPASVDK                         | 1558.7             | 2            | 2.9694 | 0.2044 |
| GFGFVTFADPASVDKVLGQPHHELDISK            | 2900.2             | 3            | 4.4781 | 0.3416 |
| GFGFVTFADPASVDKVLGQPHHELDISKTIDPK       | 3454.8             | 3            | 3.7406 | 0.3186 |
| GFGFVTFDDHDPVDK                         | 1696.8             | 2            | 4.1026 | 0.41   |
| GFGFVTFDDHDPVDKIVLQK                    | 2278.5             | 2            | 5.408  | 0.4715 |
| GFGFVTFENEDVVEK                         | 1717.9             | 2            | 4.075  | 0.3265 |
| GFGFVTFENIDDAKDAMMAMNGK                 | 2510.9             | 2            | 5.3186 | 0.5272 |
| GFGFVTFSSMAEVDAAAMAAR                   | 2066.3             | 2            | 3.7958 | 0.3585 |
| GFGFVTFSSMAEVDAAAMAARPHSIDGR            | 2829.2             | 3            | 3.5639 | 0.3383 |
| GFGFVTYATVEEVDAAMNAR                    | 2149.4             | 2            | 5.5884 | 0.2035 |
| GFGFVTYATVEEVDAAMNARPHK                 | 2511.8             | 2            | 4.6571 | 0.5264 |
| GFGFVTYATVEEVDAAMNTRPHKVDGR             | 2969.3             | 3            | 4.5387 | 0.418  |
| GFGFVTYSCVEEVDAAMCARPHK                 | 2518.9             | 3            | 3.366  | 0.1848 |
| GFGFVTYSCVEEVDAAMCARPHKVDGR             | 2946.3             | 3            | 3.2368 | 0.2336 |
| GFGFVYFQNHDAADK                         | 1716.8             | 2            | 3.9254 | 0.3667 |
| GFGFVYFQNHDAADKAAVVK                    | 2185.4             | 2            | 4.6558 | 0.4528 |
| GFGGAMTDAAALNILALSPAQNLLLK              | 2669.1             | 3            | 4.2008 | 0.2525 |
| GFGGIGGILR                              | 947.1              | 2            | 2.9487 | 0.1167 |
| GFGGITHGPPPEK                           | 1197.3             | 2            | 4.023  | 0.3944 |
| GFGGITHGPPPEKK                          | 1325.5             | 2            | 3.7419 | 0.3811 |
| GFGGLTGQIVAALSTAK                       | 1591.8             | 2            | 3.9617 | 0.3705 |
| GFGHGAGLLAHQR                           | 1321.5             | 2            | 3.55   | 0.2855 |
| GFGSDKEAILDIITSR                        | 1722.9             | 2            | 5.7721 | 0.418  |
| GFGSFRFPSGNQGGAGPSQSGGGTGGSVYTEDNDDDLYG | 3873.9             | 3            | 5.5304 | 0.4687 |
| GFGSLPALEVLDLTYNNLSENSLPGNFFYLTLR       | 3778.2             | 3            | 5.887  | 0.4385 |
| GFGTDEQAIVDVVANR                        | 1691.8             | 2            | 5.4012 | 0.4846 |

| Peptide Sequence                        | Peptide mass (m/z) | Charge State | Xcorr  | DelCn2 |
|-----------------------------------------|--------------------|--------------|--------|--------|
| GFGTDFKKLESFYIQK                        | 1909.2             | 3            | 3.7787 | 0.2282 |
| GFGVDHGQVAEQSAGVLHLR                    | 2078.3             | 3            | 4.889  | 0.302  |
| GFGYAEFEDLDSLLSALSNEESLGNRR             | 3104.3             | 3            | 3.8112 | 0.3465 |
| GFHQEVFLGK                              | 1162.3             | 2            | 2.8398 | 0.2046 |
| GFHQEVFLGKDLGGFDEDAEPR                  | 2464.6             | 3            | 5.6102 | 0.4145 |
| GFHQEVFLGKDLGGFDEDAEPRR                 | 2620.8             | 3            | 4.2033 | 0.2956 |
| GFHQVPFAPIVFIER                         | 1758.1             | 3            | 4.0049 | 0.2974 |
| GFIDKIAENVEEVKRR                        | 1876.1             | 3            | 3.3233 | 0.2227 |
| GFIGPGIDVPAPDMSTGER                     | 1917.1             | 2            | 5.227  | 0.4552 |
| GFIYPMLPGGPGGPGAEDVAVWTRAQR             | 2801.2             | 3            | 3.3146 | 0.1269 |
| GFKDQIYDIFQK                            | 1502.7             | 2            | 4.2863 | 0.3138 |
| GFKEQIYDVYR                             | 1418.6             | 2            | 2.8381 | 0.224  |
| GFKFDETEQALANER                         | 1755.9             | 2            | 4.1889 | 0.4939 |
| GFKGELIHVFNK                            | 1389.6             | 3            | 3.9034 | 0.3561 |
| GFKGELIHVFNKHDGALR                      | 2039.3             | 2            | 3.2504 | 0.2168 |
| GFKNSPTIFGEALAR                         | 1608.8             | 2            | 2.502  | 0.1504 |
| GFLEFVEDFIQVPR                          | 1696.9             | 2            | 3.6821 | 0.3315 |
| GFLFGPSLAQELGLGCVLIR                    | 2091.5             | 2            | 2.8558 | 0.1817 |
| GFLIDGYPR                               | 1038.2             | 2            | 3.2285 | 0.3291 |
| GFLNSSELSGLPAGPDREGSLKDQLALAIGK         | 3142.5             | 3            | 4.7121 | 0.2348 |
| GFLSGLLDNVKQELAK                        | 1733.0             | 2            | 4.6088 | 0.3257 |
| GFLSGPMGSGMR                            | 1197.4             | 2            | 2.936  | 0.2508 |
| GFLWDEGFHQLVVQR                         | 1832.1             | 2            | 5.1067 | 0.4301 |
| GFNEGLWEIENNPVVK                        | 1804.0             | 2            | 3.7797 | 0.3622 |
| GFPGYMYTDLATYER                         | 1898.1             | 2            | 5.6326 | 0.5528 |
| GFPLITIVR                               | 1117.4             | 2            | 3.2664 | 0.3264 |
| GFPTDATLDDIKEWLEDKQVLSLNIQMR            | 3134.5             | 3            | 5.3793 | 0.4399 |
| GFPTIYFSPANK                            | 1342.5             | 2            | 3.5041 | 0.2912 |
| GFPTIYFSPANKK                           | 1470.7             | 2            | 3.6127 | 0.281  |
| GFPTIYFSPANKKLNPK                       | 1923.2             | 2            | 4.0223 | 0.3553 |
| GFQALGDAADIR                            | 1234.3             | 2            | 2.9565 | 0.2451 |
| GFQHLLHTLNLPGHGLETR                     | 2141.4             | 3            | 3.2367 | 0.2574 |
| GFQQILAGEYDHLPEQAFYMGPIEEAVAK           | 3352.8             | 2            | 3.8057 | 0.3649 |
| GFQQILAGEYDHLPEQAFYMGPIEEAVAKADK        | 3667.1             | 3            | 5.8547 | 0.3413 |
| GFQQILAGEYDHLPEQAFYMGPIEEAVAKADKLAEEHSS | 4420.9             | 3            | 4.8252 | 0.342  |
| GFQRPVYLFHK                             | 1392.6             | 3            | 3.7041 | 0.3228 |

| Peptide Sequence                 | Peptide mass (m/z) | Charge State | Xcorr  | DelCn2 |
|----------------------------------|--------------------|--------------|--------|--------|
| GFQSSQALR                        | 994.1              | 2            | 2.6455 | 0.2869 |
| GFQVAPEHHNDHK                    | 1516.6             | 2            | 2.5899 | 0.2436 |
| GFSDKLDFLEGDQKPLAQR              | 2165.4             | 3            | 4.1252 | 0.2068 |
| GFSEGLWEIENNPTVK                 | 1821.0             | 2            | 3.8059 | 0.1946 |
| GFSLEELR                         | 951.1              | 2            | 2.4685 | 0.1582 |
| GFSLLATEDKEALKK                  | 1650.9             | 2            | 4.1205 | 0.2049 |
| GFSQEELETMINQAPGCPDYSILSFMGAFHGR | 3638.1             | 3            | 5.7643 | 0.4242 |
| GFSVADTPELQR                     | 1419.6             | 2            | 4.2885 | 0.4182 |
| GFTGIDSDYEKPEPPER                | 1942.0             | 2            | 4.8243 | 0.4503 |
| GFTIPEAFR                        | 1038.2             | 2            | 2.4808 | 0.1719 |
| GFVEFAAKPPAR                     | 1290.5             | 2            | 2.656  | 0.1663 |
| GFVFITFKEEEPVKK                  | 1799.1             | 2            | 4.4441 | 0.4443 |
| GFVLQDTVEQLR                     | 1405.6             | 2            | 3.3214 | 0.1302 |
| GFVPDTPVGVVAHFLLQR               | 1854.1             | 2            | 3.5134 | 0.1428 |
| GFVPSPTSQPGGHESLVDR              | 1968.1             | 2            | 3.9564 | 0.3801 |
| GFVQVDDGRK                       | 1121.2             | 2            | 2.9196 | 0.2525 |
| GFVTADMIR                        | 1010.2             | 2            | 2.4657 | 0.2759 |
| GFVVQGSNGEFPFLTSSER              | 2059.2             | 2            | 3.6709 | 0.3582 |
| GFYEALFDGHPPGKVR                 | 1791.0             | 3            | 3.6929 | 0.3179 |
| GFYIQEGVK                        | 1204.4             | 2            | 3.0736 | 0.309  |
| GGAARPNGPAAGNK                   | 1238.3             | 2            | 3.2381 | 0.2447 |
| GGAEQFMEETER                     | 1384.5             | 2            | 3.8877 | 0.3727 |
| GGAEVQIFAPDVPQMVIDHTK            | 2390.7             | 2            | 4.6178 | 0.3437 |
| GGAEVQIFAPDVPQMVIDHTKGQPSEGESR   | 3318.6             | 3            | 4.8883 | 0.3437 |
| GGAGVGSMTK                       | 865.0              | 2            | 3.1268 | 0.2907 |
| GGARVEPADASGTEK                  | 1445.5             | 2            | 4.2588 | 0.3808 |
| GGARVEPADASGTEKAFEPATGR          | 2275.4             | 2            | 4.7939 | 0.4638 |
| GGDAPAAGEDA                      | 930.9              | 1            | 2.4848 | 0.2726 |
| GGDKVLLHFVQK                     | 1341.6             | 2            | 3.3255 | 0.313  |
| GGDLMAYDR                        | 998.1              | 2            | 3.4642 | 0.2981 |
| GGDPSKEPERVVHYEI                 | 1813.0             | 2            | 2.5216 | 0.1572 |
| GGDSIGETPTPGASK                  | 1374.4             | 2            | 3.5134 | 0.2818 |
| GGEDGPAIAIDLGINETNDLKR           | 2356.5             | 3            | 5.0349 | 0.3612 |
| GGEERVGEEDDEAAEAEAEAEAEER        | 2692.6             | 2            | 5.8047 | 0.4681 |
| GGEERVGEEDDEAAEAEAEAEAEERAR      | 2919.9             | 3            | 6.2411 | 0.3929 |
| GGEIQPVSVK                       | 1014.2             | 2            | 3.5058 | 0.1778 |

| Peptide Sequence                                 | Peptide mass (m/z) | Charge State | Xcorr  | DelCn2 |
|--------------------------------------------------|--------------------|--------------|--------|--------|
| GGEIQVSVKVGDKVLLPEYGGTK                          | 2471.8             | 3            | 3.5133 | 0.1399 |
| GGELVYTDSEARDVFEK                                | 1916.0             | 2            | 3.976  | 0.3649 |
| GGENVKAINQQTGAFVEISR                             | 2119.3             | 3            | 4.1422 | 0.3688 |
| GGFCNFMHLKPISR                                   | 1607.9             | 2            | 3.3685 | 0.239  |
| GGFKDTPDELLSAVMTAVLK                             | 2194.5             | 3            | 3.8988 | 0.282  |
| GGFLPPEEIKER                                     | 1372.6             | 2            | 2.6646 | 0.1838 |
| GGFNMSSFK                                        | 975.1              | 1            | 3.0851 | 0.2691 |
| GGFSFGNVEPASLPSASVFLGR                           | 2296.6             | 2            | 4.9431 | 0.4396 |
| GGFVLLDGETFEVK                                   | 1511.7             | 2            | 4.1325 | 0.288  |
| GGGAFVQNSQPVAVR                                  | 1487.6             | 2            | 4.7284 | 0.3942 |
| GGGAMGHMLLPFR                                    | 1344.6             | 2            | 2.7093 | 0.1817 |
| GGGDLPNSQEALQK                                   | 1414.5             | 2            | 3.2465 | 0.2263 |
| GGGEELAQLAGVPFLGSVPLDPALMR                       | 2596.0             | 2            | 3.5307 | 0.2369 |
| GGGEQETQELASK                                    | 1334.4             | 2            | 4.048  | 0.338  |
| GGGFGAGPGPGGLQSGQTIALPAQGLIEFR                   | 2869.2             | 3            | 5.7495 | 0.3505 |
| GGGGFRGRGGGGGFQRYENRGPPGGNRGGFQNR                | 3338.5             | 3            | 3.6463 | 0.2006 |
| GGGGGGGGGGGLGGGLGNVLGGLISGAGGGGGGGGGGGGGGGGGTAMR | 3583.7             | 3            | 8.1271 | 0.5513 |
| GGGGGGGKKSLSARNAVER                              | 1830.0             | 2            | 2.6728 | 0.2046 |
| GGGGGGPGEGFDVAK                                  | 1262.3             | 2            | 3.0131 | 0.2993 |
| GGGGGQDNGLEGLGNSDR                               | 1660.6             | 2            | 4.6505 | 0.4235 |
| GGGGNFGPGPGSNFR                                  | 1378.4             | 2            | 3.2597 | 0.3901 |
| GGGGPGGGPGGGGSAGGPSQPPGGGGPGIRK                  | 2399.5             | 3            | 3.5654 | 0.3131 |
| GGGGYGGSDGYNGFGNDGGYGGGGPGYSSGSR                 | 2875.8             | 3            | 6.0976 | 0.5086 |
| GGGHVAQIYAIR                                     | 1242.4             | 2            | 3.1163 | 0.3393 |
| GGGKDVSAQATGK                                    | 1176.3             | 2            | 3.7349 | 0.3123 |
| GGGLTGLLVGTLDVVLDSSAR                            | 2001.3             | 2            | 3.423  | 0.3454 |
| GGGPQAQSHGEAR                                    | 1252.3             | 2            | 3.0564 | 0.3694 |
| GGGPTSSEQIMK                                     | 1192.3             | 2            | 2.8241 | 0.3232 |
| GGGQIIPTAR                                       | 970.1              | 2            | 2.6448 | 0.1229 |
| GGGVGGFLPAMK                                     | 1091.3             | 2            | 2.7928 | 0.2116 |
| GGHAAAYSSAVNILLGHGTR                             | 1882.1             | 2            | 2.712  | 0.3849 |
| GGHFAAFEPELLAQDIR                                | 2001.2             | 2            | 6.2729 | 0.477  |
| GGHFAAFEPELLAQDIRK                               | 2129.4             | 3            | 6.3984 | 0.4988 |
| GGHFYSAKPEILR                                    | 1475.7             | 2            | 3.7932 | 0.3755 |
| GGHGAASPSEK                                      | 998.0              | 2            | 2.9416 | 0.3385 |
| GGHMDDGGYSMNFNMSSSR                              | 2051.2             | 3            | 6.0413 | 0.5833 |

| Peptide Sequence                           | Peptide mass (m/z) | Charge State | Xcorr  | DelCn2 |
|--------------------------------------------|--------------------|--------------|--------|--------|
| GGHPPAIQSLINLLADNR                         | 1887.1             | 3            | 4.5123 | 0.4397 |
| GGHSGQLGPSSVAPSRPEDELEHLTK                 | 2834.1             | 3            | 4.8031 | 0.3367 |
| GGHSGQLGPSSVAPSRPEDELEHLTKK                | 2962.2             | 3            | 5.1327 | 0.4566 |
| GGHSSSLFGNIK                               | 1204.3             | 2            | 3.6461 | 0.4362 |
| GGHVDLTM LGAMQVSK                          | 1644.9             | 2            | 3.7106 | 0.1381 |
| GGIMLPEK                                   | 845.0              | 2            | 2.5674 | 0.1071 |
| GGIMLPEKSQ GK                              | 1245.5             | 2            | 3.557  | 0.224  |
| GGIREGSLDLGHAPLGPYAR                       | 2037.3             | 2            | 3.3342 | 0.109  |
| GGIVDEGALLR                                | 1100.3             | 2            | 3.104  | 0.2652 |
| GGIVGMTLPIAR                               | 1185.5             | 2            | 4.1552 | 0.3403 |
| GGKAVANYDSVEEGEKVVK                        | 1980.2             | 3            | 4.4022 | 0.3703 |
| GGKEFVEAVLELR                              | 1447.7             | 2            | 4.333  | 0.3831 |
| GGKEFVEAVLELRK                             | 1575.8             | 3            | 3.7731 | 0.2445 |
| GGKPEPPAMPQPVPPTA                          | 1574.8             | 2            | 3.6698 | 0.3821 |
| GGKSGELEQEEER                              | 1448.5             | 2            | 4.5264 | 0.3539 |
| GGKSGELEQEEERLSKEWEDS                      | 2423.5             | 2            | 4.9733 | 0.3835 |
| GGKSGELEQEEERLSKEWEDSKR                    | 2707.8             | 3            | 4.9894 | 0.257  |
| GGLDVTGQTGVESVYTTFR                        | 2125.3             | 3            | 3.4381 | 0.1828 |
| GGLGGGYGGASGMGGITAVTVNQSL                  | 2182.4             | 2            | 4.3762 | 0.4031 |
| GGLGGGYGGASGMGGITAVTVNQSLLSPLVLEVDPNIQAVR  | 3927.4             | 3            | 7.1545 | 0.5929 |
| GGLGLILKR                                  | 927.2              | 2            | 2.8545 | 0.1322 |
| GGLGLSGAK                                  | 759.9              | 1            | 1.6715 | 0.1307 |
| GGLKLNPNFLVDFGKEPLGPALAHCLR                | 2904.4             | 3            | 4.473  | 0.1966 |
| GGLPITQLFR                                 | 1102.3             | 2            | 2.5121 | 0.2679 |
| GGLPLEEVTVAEVLAAAR                         | 1725.0             | 2            | 5.6841 | 0.3706 |
| GGLRKPEASHSFENR                            | 1685.8             | 2            | 3.9705 | 0.3265 |
| GGLVDEKALAAALKEGR                          | 1756.0             | 3            | 4.9868 | 0.4138 |
| GGMGSGGLATGIAGGLAGMGGIQNEK                 | 2262.6             | 2            | 6.1943 | 0.4755 |
| GGMGSGGLATGIAGGLAGMGGIQNEKETMQSLNDR        | 3337.7             | 3            | 5.9813 | 0.4782 |
| GGMGSGGLATGIAGGLAGMGGIQNEKETMQSLNDRLASYLDR | 4156.6             | 3            | 4.2406 | 0.2838 |
| GGNEESTKTGNAGSR                            | 1465.5             | 2            | 4.0975 | 0.3926 |
| GGNFGFGDSR                                 | 1014.0             | 2            | 3.204  | 0.1838 |
| GGNIGDGGGAADR                              | 1117.1             | 2            | 3.9887 | 0.3179 |
| GGNIGDGGGAADRVINQILTEMDGMSTK               | 2779.1             | 2            | 4.8231 | 0.2469 |
| GGNIGDGGGAADRVINQILTEMDGMSTKK              | 2907.2             | 3            | 4.1444 | 0.1572 |
| GGNLRDKLDGNELDLSLSDLNEVPVKELAAALPK         | 3535.0             | 3            | 6.116  | 0.4963 |

| Peptide Sequence                       | Peptide mass (m/z) | Charge State | Xcorr  | DelCn2 |
|----------------------------------------|--------------------|--------------|--------|--------|
| GGNNSFTHEALTLK                         | 1489.6             | 2            | 3.777  | 0.3018 |
| GGNRFEPYANPTKR                         | 1607.8             | 3            | 4.0438 | 0.2498 |
| GGNVGINSFGFGGSNVHIILRPNTQPPPAPAPHATLPR | 3860.3             | 3            | 5.0643 | 0.3716 |
| GGNVPQLDAPISQFYADR                     | 1949.1             | 3            | 4.7165 | 0.4632 |
| GGPASVPSSSPGTSVK                       | 1415.5             | 2            | 3.1757 | 0.2303 |
| GGPDFSNLEK                             | 1064.1             | 2            | 2.6065 | 0.1217 |
| GGPEETITQQGR                           | 1273.3             | 2            | 3.7333 | 0.2488 |
| GGPEKHEVTGWVLVSPLSK                    | 2021.3             | 3            | 5.3184 | 0.4074 |
| GGPNIITLADIVKDPVSR                     | 1866.2             | 2            | 4.5951 | 0.4807 |
| GGPNYQEGLR                             | 1091.2             | 2            | 3.4886 | 0.1997 |
| GGPPFAFVEFEDPRDAEDAVYGR                | 2542.7             | 2            | 3.8081 | 0.3971 |
| GGPPFAFVEFEDPRDAEDAVYGRDGYDYDGYR       | 3647.8             | 3            | 3.3197 | 0.3193 |
| GGSPGDVEAIKNAIANASTLAEVERLK            | 2809.1             | 3            | 3.4585 | 0.4106 |
| GGPTPQEAIQR                            | 1154.3             | 2            | 3.076  | 0.2435 |
| GGPVQVLEDEELKSQPEPLVVK                 | 2391.7             | 3            | 5.3017 | 0.3397 |
| GGQIGLQAPGLSVSGPQGHLESGSGK             | 2419.6             | 3            | 3.3565 | 0.1431 |
| GGQLQEQLTQQLSQALSSAVAGR                | 2371.6             | 3            | 4.2666 | 0.3661 |
| GGQLQEQLTQQLSQALSSAVAGRLER             | 2770.1             | 3            | 5.9492 | 0.4572 |
| GGQTHLGLPVFNTVK                        | 1568.8             | 2            | 4.1809 | 0.4219 |
| GGQTHLGLPVFNTVKEAK                     | 1897.2             | 2            | 4.6506 | 0.3827 |
| GGQVIQIPVADITVGDIAQVK                  | 2122.5             | 3            | 3.2097 | 0.1958 |
| GGQVVNLMNQR                            | 1216.4             | 2            | 2.8952 | 0.1754 |
| GGQVYATNTR                             | 1067.1             | 2            | 3.3444 | 0.3123 |
| GGRGDVGSADIQDLEK                       | 1617.7             | 2            | 3.8333 | 0.255  |
| GGRGDVGSADIQDLEKWLAK                   | 2116.3             | 3            | 6.4521 | 0.2571 |
| GGRHPSAHDVILEGAGLR                     | 1843.0             | 2            | 3.9815 | 0.4359 |
| GGSAAATSNPHHDNVR                       | 1591.6             | 2            | 4.7111 | 0.4411 |
| GGSASVWSER                             | 1036.1             | 2            | 3.2017 | 0.2388 |
| GGSDGYGSGR                             | 912.9              | 2            | 3.5252 | 0.389  |
| GGSGSGPTIEEVD                          | 1205.2             | 2            | 3.3021 | 0.3498 |
| GGSGSHNWGTVKDELTEPK                    | 2087.2             | 3            | 5.075  | 0.4646 |
| GGSHDAPENTLAAIR                        | 1509.6             | 2            | 2.9662 | 0.2271 |
| GGSLPKVEAK                             | 986.1              | 2            | 2.6405 | 0.1046 |
| GGSLPSHHQTR                            | 1177.3             | 2            | 3.0608 | 0.3034 |
| GGSMHMYAK                              | 982.2              | 2            | 2.5521 | 0.2911 |
| GGSPFAIVITQQHQIHR                      | 1890.1             | 2            | 3.6763 | 0.2599 |

| Peptide Sequence                 | Peptide mass (m/z) | Charge State | Xcorr  | DelCn2 |
|----------------------------------|--------------------|--------------|--------|--------|
| GGSRGEEVGELSR                    | 1333.4             | 2            | 3.4611 | 0.1314 |
| GGSEIAFHTIPVIQR                  | 1712.9             | 2            | 3.7209 | 0.234  |
| GGTLKDDDWGNIK                    | 1419.5             | 2            | 3.5439 | 0.3334 |
| GGTQEPAPVPAEPFDNTTYK             | 2120.3             | 2            | 3.8512 | 0.2892 |
| GGTWFAGFGR                       | 1056.2             | 2            | 3.2529 | 0.4312 |
| GGVADALLYR                       | 1035.2             | 2            | 3.8862 | 0.2811 |
| GGVASGFKHVVPNEVVVQR              | 1980.3             | 2            | 4.427  | 0.4389 |
| GGVDHAAAFGR                      | 1058.1             | 2            | 3.0862 | 0.3792 |
| GGVDTAAAPAGGAPPAHAPGPGR          | 1953.1             | 3            | 3.8244 | 0.2365 |
| GGVHLTKDPNVVGQLAK                | 1734.0             | 2            | 4.5585 | 0.4342 |
| GGVVAGNVAHILDSNHGK               | 1745.9             | 2            | 2.7793 | 0.2565 |
| GGVVAGNVAHILDSNHGKK              | 1874.1             | 2            | 4.1397 | 0.3581 |
| GGVVGKVDK                        | 972.2              | 2            | 2.6733 | 0.198  |
| GGVVGKVDKGVVPLAGTNGETTTQGLDGLSER | 3226.6             | 2            | 7.3336 | 0.2803 |
| GGVVNAAKEEHETDEKR                | 1870.0             | 3            | 3.3921 | 0.2801 |
| GGVVTSNPLGF                      | 1048.2             | 2            | 2.8356 | 0.2337 |
| GGYFLVDFYAPTAAVESMVEHLSR         | 2661.0             | 3            | 3.8921 | 0.3038 |
| GGYIGSTYFER                      | 1250.3             | 2            | 2.9819 | 0.155  |
| GGYVLHIGTIYGDLK                  | 1606.8             | 2            | 4.2532 | 0.3325 |
| GHAFTSDPKPTIEVSGK                | 1843.0             | 2            | 5.6435 | 0.5223 |
| GHAFTSDPKPTIEVSGKK               | 1971.2             | 2            | 5.4167 | 0.443  |
| GHAAPILYAVWAEAGFLAEAE LLNLR      | 2797.2             | 3            | 3.6393 | 0.195  |
| GHAAPILYAVWAEAGFLAEAE LLNLRK     | 2925.4             | 3            | 4.0889 | 0.3817 |
| GHADSVTGLSLSSEGSYLLSNAMDNTVR     | 2883.1             | 3            | 4.5261 | 0.3408 |
| GHAGNPRDPTDEGIFISK               | 1912.1             | 2            | 3.4382 | 0.3369 |
| GHASAPYFGKEEPSVAPSSTGK           | 2205.4             | 3            | 4.2191 | 0.3104 |
| GHAVGDIPGVR                      | 1078.2             | 2            | 2.6129 | 0.2243 |
| GHAVNLLDVPVVAR                   | 1557.8             | 2            | 3.5702 | 0.4422 |
| GHDEREHPFLVK                     | 1464.6             | 2            | 3.2126 | 0.2032 |
| GHDFHEGVR                        | 1054.1             | 2            | 2.8819 | 0.2886 |
| GHDHVLQFLVSIPSYEPQETDSLSQMETK    | 3317.6             | 3            | 5.2334 | 0.4209 |
| GHDLMSNTPDSVPPEELKPYHIR          | 2633.9             | 3            | 4.3067 | 0.3667 |
| GHDQYAYDGKDYIALNEDLR             | 2357.5             | 3            | 4.3716 | 0.1959 |
| GHEAEESR                         | 914.9              | 2            | 2.6242 | 0.2589 |
| GHEFYNPQKK                       | 1248.4             | 2            | 3.1586 | 0.2486 |
| GHEKEALQLMATYLPK                 | 1830.1             | 2            | 3.5794 | 0.3037 |



| Peptide Sequence                                | Peptide mass (m/z) | Charge State | Xcorr  | DelCn2 |
|-------------------------------------------------|--------------------|--------------|--------|--------|
| GHETTGH TYER                                    | 1288.3             | 2            | 3.1489 | 0.2872 |
| GHFASVWQR                                       | 1088.2             | 2            | 2.5745 | 0.2568 |
| GHFDYQSLLMR                                     | 1367.6             | 2            | 3.5867 | 0.4008 |
| GHFEEKQQLSSLITDLQSSISNLSQAK                     | 3119.4             | 3            | 4.531  | 0.2798 |
| GHFEEKQQLSSLITDLQSSISNLSQAKEELEQASQAHGAR        | 4526.8             | 3            | 5.7879 | 0.4319 |
| GHFGPINSVAFHPDGK                                | 1680.8             | 3            | 4.3181 | 0.4393 |
| GHFNIQPNKK                                      | 1183.3             | 2            | 3.1195 | 0.2229 |
| GHFTSLELVPPSTLTTTHLKAEP LTK                     | 2820.2             | 3            | 4.1088 | 0.1864 |
| GHGAGGASILTFWDAR                                | 1616.8             | 2            | 3.6498 | 0.3761 |
| GHGFITPADGGPDIFLHISDVEGEYVPVEGDEV TYK           | 3862.2             | 3            | 5.6186 | 0.432  |
| GHGVLHTLIR                                      | 1103.3             | 2            | 2.6033 | 0.2276 |
| GHHLPSENLGKEPLDPDPSHSPSDK                       | 2691.9             | 3            | 3.7586 | 0.2068 |
| GHHLPSENLGKEPLDPDPSHSPSDKVGR                    | 3004.2             | 3            | 4.6542 | 0.2615 |
| GHHVAQLDPLGILDADLDSSVPADIISSTDK                 | 3201.5             | 3            | 7.4386 | 0.6006 |
| GHIASVLNAWPEDVIK                                | 1750.0             | 2            | 2.5053 | 0.1386 |
| GHIAVSAAVFPTGTK                                 | 1456.7             | 2            | 3.648  | 0.3256 |
| GHITAGSNK                                       | 885.0              | 1            | 2.7993 | 0.2374 |
| GHKEIINAIDGIGGLGIGEGAPEIVTGSR                   | 2832.2             | 3            | 5.6871 | 0.3449 |
| GHLAAAANHR                                      | 1018.1             | 2            | 2.6131 | 0.2273 |
| GHLDNISNLLIGAINIENGK                            | 2220.5             | 3            | 6.092  | 0.4285 |
| GHLDNISNLLIGAINIENGKANSVR                       | 2748.0             | 3            | 5.1045 | 0.4036 |
| GHLDPTWALQQLQQLR                                | 1905.1             | 3            | 4.3671 | 0.3208 |
| GHLENNPALEK                                     | 1222.3             | 2            | 3.6034 | 0.3861 |
| GHLENNPALEKLLPHIR                               | 1952.2             | 2            | 4.0606 | 0.3865 |
| GHLESSLLSHLVDPK                                 | 1632.8             | 2            | 4.2224 | 0.4199 |
| GHLESSLLSHLVDPKDLEPR                            | 2243.5             | 3            | 4.194  | 0.421  |
| GHHLLET SIDGILADV K                             | 1932.2             | 2            | 3.6283 | 0.3508 |
| GHLLYVALSPGQHR                                  | 1548.8             | 2            | 4.0615 | 0.4431 |
| GHLQIAACPNDPLQGTGLIPLLIGIDVWEHAYYLQYK           | 4238.8             | 3            | 6.5893 | 0.575  |
| GHLSRPEAQSLSPYTT SANR                           | 2173.3             | 2            | 4.613  | 0.3951 |
| GHMPPLTSAQQALTGTINSSMQAVQAAQATLDDFDL PPLGQDAASK | 4797.3             | 3            | 5.5515 | 0.3075 |
| GHNGWVTQIATTPQFPDMILSASR                        | 2628.9             | 3            | 4.5493 | 0.3296 |
| GHNPLGLMYHDASR                                  | 1568.7             | 2            | 3.3251 | 0.4315 |
| GHNSALLQIHLQAELEALR                             | 2242.5             | 3            | 5.5544 | 0.4011 |
| GHNTNVGAIVFHPK                                  | 1491.7             | 3            | 3.8025 | 0.4157 |
| GHNVGSLFHMADDLGR                                | 1726.9             | 2            | 2.4847 | 0.2634 |

| Peptide Sequence                    | Peptide mass (m/z) | Charge State | Xcorr  | DelCn2 |
|-------------------------------------|--------------------|--------------|--------|--------|
| GHPDLQGQPAEEIFESVGDR                | 2182.3             | 2            | 4.5577 | 0.4698 |
| GHPDRLSLQLALTELETLAEK               | 2335.6             | 3            | 3.7125 | 0.2119 |
| GHPSSPPVVDTVHGK                     | 1514.7             | 3            | 4.7796 | 0.3465 |
| GHQAALGLMER                         | 1183.4             | 2            | 3.5201 | 0.4433 |
| GHQAFDVGQPR                         | 1212.3             | 2            | 3.4263 | 0.3946 |
| GHQLLSADVDIKELAVETK                 | 2067.3             | 3            | 4.6562 | 0.3946 |
| GHQQLYWSHPR                         | 1409.5             | 2            | 4.0116 | 0.4794 |
| GHREEEQEDLTK                        | 1471.5             | 2            | 2.7657 | 0.1355 |
| GHRIEEVPELPLVVEDK                   | 1960.2             | 2            | 4.6854 | 0.3462 |
| GHRIEEVPELPLVVEDKVEGYK              | 2536.9             | 2            | 5.5459 | 0.4444 |
| GHRIEEVPELPLVVEDKVEGYKK             | 2665.0             | 3            | 7.4866 | 0.5187 |
| GHRIEEVPELPLVVEDKVEGYRK             | 2693.1             | 3            | 5.2437 | 0.3294 |
| GHSAAVHSFAFSNDSR                    | 1690.8             | 2            | 4.3819 | 0.4201 |
| GHSEKEVADAIR                        | 1312.4             | 2            | 3.5172 | 0.3667 |
| GHSGGSGGGSGSGPGIKK                  | 1541.6             | 2            | 3.2861 | 0.453  |
| GHSLSDGLEEVQK                       | 1399.5             | 2            | 3.2821 | 0.33   |
| GHSLSDGLEEVQKAEMK                   | 1859.1             | 3            | 3.941  | 0.3471 |
| GHTELLTVEQALADFAELLR                | 2227.5             | 2            | 6.236  | 0.5674 |
| GHTEVIVPHLTESYNSHRDPPEEEIPFCTLK     | 3576.9             | 3            | 3.3269 | 0.1365 |
| GHTFAEELQK                          | 1160.3             | 2            | 2.5935 | 0.336  |
| GHTPTQPGALNQR                       | 1377.5             | 2            | 3.1108 | 0.2489 |
| GHVAHLEDDEGDDDESKHSTLK              | 2435.5             | 3            | 4.9577 | 0.3819 |
| GHVDILAPTVQELAALEK                  | 1905.2             | 2            | 4.1899 | 0.3116 |
| GHVDILAPTVQELAALEKEAQTSLHLGYLPNQLFR | 4021.6             | 3            | 3.8343 | 0.2048 |
| GHVFEEESQVAGTPMFVVK                 | 1963.2             | 2            | 6.7829 | 0.5199 |
| GHVQDPNDRR                          | 1194.2             | 2            | 2.747  | 0.1335 |
| GHVSLAAELSK                         | 1112.3             | 2            | 3.0985 | 0.3092 |
| GHYNNVSCAVFHPR                      | 1601.8             | 3            | 4.4437 | 0.41   |
| GHYTEGAELVDAVLVVR                   | 1944.1             | 2            | 6.1031 | 0.4689 |
| GHYTEGAELVDAVLVVRK                  | 2072.3             | 3            | 6.078  | 0.4884 |
| GHYTEGAELVDSVLVVR                   | 1960.1             | 2            | 7.3734 | 0.555  |
| GHYTEGAELVDSVLVVRK                  | 2088.3             | 2            | 6.6113 | 0.4839 |
| GHYTIGK                             | 775.9              | 1            | 1.6304 | 0.1369 |
| GHYTIGKEIIDLVLDLDR                  | 1843.1             | 2            | 5.3489 | 0.4316 |
| GHYTIGKEIIDLVLDLDRIR                | 2112.5             | 3            | 3.26   | 0.185  |
| GHYTIGKEIIDPVLDLDR                  | 1827.1             | 3            | 5.1418 | 0.4099 |

| Peptide Sequence                         | Peptide mass (m/z) | Charge State | Xcorr  | DelCn2 |
|------------------------------------------|--------------------|--------------|--------|--------|
| GHYTIGKEIDPVLDRIR                        | 2096.4             | 3            | 3.6751 | 0.3043 |
| GHYTIGKEIVDLVLR                          | 1829.1             | 2            | 3.7747 | 0.2337 |
| GIAAPHAGANVKPR                           | 1359.6             | 2            | 3.2774 | 0.3845 |
| GIAEENKLVTSNPFVVTQALVALLADKGAK           | 3098.6             | 3            | 3.4324 | 0.1463 |
| GIAGEKFDIVKK                             | 1305.5             | 2            | 3.2915 | 0.2325 |
| GIAGRQDILDDSGYVSAYK                      | 2029.2             | 3            | 5.1951 | 0.4385 |
| GIAGRQDILDDSGYVSAYKNAGTYDAK              | 2850.0             | 3            | 4.1592 | 0.2368 |
| GIALIFNHER                               | 1170.3             | 2            | 3.4426 | 0.2803 |
| GIAPAPALSVSPQNNHSPDPGLSNLAASYLNPVK       | 3398.8             | 3            | 4.9215 | 0.3139 |
| GIATNDVGIQK                              | 1116.3             | 2            | 3.3557 | 0.3785 |
| GIATNDVGIQKDGAPK                         | 1584.8             | 2            | 3.2474 | 0.1836 |
| GIAYIEFKTEADA EKTFEEKQGTEIDGR            | 3177.4             | 3            | 4.998  | 0.4915 |
| GIAYVEFVDVSSVPLAIGLTGQR                  | 2392.7             | 3            | 4.4013 | 0.3231 |
| GIDEGPEGLKLISDIIR                        | 1826.1             | 2            | 3.8041 | 0.2799 |
| GIDEGPEGLKLISDIIREK                      | 2083.4             | 2            | 2.6591 | 0.1444 |
| GIDIHGVPPYVINVTLPDEKQNYVHR               | 2878.2             | 3            | 5.8694 | 0.4653 |
| GIDIIIEMLANVNLSKDLSLLSHGGR               | 2780.2             | 3            | 4.4281 | 0.295  |
| GIDLTQVK                                 | 874.0              | 2            | 2.641  | 0.1408 |
| GIDPFSLDALSK                             | 1263.4             | 2            | 3.1862 | 0.1893 |
| GIDPFSLDALSKEGIVALR                      | 2002.3             | 3            | 3.9326 | 0.2057 |
| GIDRYNPENLATLER                          | 1761.9             | 2            | 4.2955 | 0.2803 |
| GIDVQQVSLVINYLPTNR                       | 2145.4             | 3            | 5.4307 | 0.3124 |
| GIDVQQVSLVINYLPTNRENYIHR                 | 2958.3             | 3            | 3.8588 | 0.2889 |
| GIDYDKLIVR                               | 1192.4             | 2            | 2.9297 | 0.3333 |
| GIEAGSEDIDILPNGLAFFSVGLK                 | 2463.8             | 3            | 4.5171 | 0.3563 |
| GIEGVQVIPLIPGAGEIIIADNIIK                | 2544.0             | 3            | 3.5518 | 0.135  |
| GIEILTDMSRPVELSDRETLNLSATTSLNSK          | 3392.8             | 3            | 5.8729 | 0.5159 |
| GIEKNLGIGK                               | 1029.2             | 1            | 2.8198 | 0.1745 |
| GIEKNLGIGKVSSFEEK                        | 1836.1             | 3            | 4.1513 | 0.1978 |
| GIEKPPFELPDFIKR                          | 1787.1             | 3            | 4.3792 | 0.3179 |
| GIELAYLEQLHGQHEAWLIHK                    | 2486.8             | 3            | 4.7442 | 0.4654 |
| GIEMSEVRLNLDK                            | 1504.7             | 2            | 3.5578 | 0.1816 |
| GIEMSEVRLNLDKMMMEQK                      | 2152.5             | 2            | 3.4279 | 0.3377 |
| GIEQAVQSHAVAE EEAR                       | 1824.9             | 2            | 5.5934 | 0.5463 |
| GIFEALRPLETLPVEGLIR                      | 2124.5             | 3            | 4.3063 | 0.2911 |
| GIFGDHPGHSYGDLPGPSPAQLFQDSGLLYLAQELPAPSR | 4207.6             | 3            | 6.4627 | 0.4792 |

| Peptide Sequence             | Peptide mass (m/z) | Charge State | Xcorr  | DelCn2 |
|------------------------------|--------------------|--------------|--------|--------|
| GIFLHLSNQHEFGR               | 1655.8             | 2            | 3.6059 | 0.2925 |
| GIFNGFSVTLKEDGVR             | 1740.0             | 2            | 4.1034 | 0.4483 |
| GIFTKEDALK                   | 1122.3             | 2            | 2.7631 | 0.3211 |
| GIFTKEDALKLVQLK              | 1704.0             | 2            | 4.3364 | 0.3175 |
| GIFTSEIGTK                   | 1053.2             | 2            | 2.9943 | 0.3438 |
| GIGFLTSGWR                   | 1094.2             | 2            | 3.0891 | 0.2724 |
| GIGHVIKVPDNYGDEIAIELR        | 2309.6             | 3            | 5.148  | 0.4375 |
| GIGIENIHYLNDGLWHMK           | 2111.4             | 3            | 4.59   | 0.4398 |
| GIGIHHGGLLPILK               | 1425.7             | 2            | 3.9108 | 0.3136 |
| GIGMGNIGPAGMGMEGIGFGINK      | 2179.6             | 2            | 5.8487 | 0.5115 |
| GIGQVLPTHLMEER               | 1580.8             | 2            | 2.4863 | 0.1588 |
| GIGTDEFTLNR                  | 1223.3             | 2            | 2.914  | 0.3612 |
| GIGTDEKMLISILTER             | 1777.1             | 2            | 5.3281 | 0.3383 |
| GIHDAFVK                     | 887.0              | 2            | 2.4164 | 0.1023 |
| GIHFCHDLVSLCNFHNVDNLR        | 2518.8             | 3            | 3.9978 | 0.3384 |
| GIHNSIGDYR                   | 1132.2             | 2            | 2.8057 | 0.328  |
| GIHPTIISESFQK                | 1457.7             | 3            | 4.3659 | 0.3487 |
| GIHQSTIDLKNELK               | 1596.8             | 2            | 4.2319 | 0.397  |
| GIHSAIDASQTPDVVFASILAAFSK    | 2546.9             | 3            | 6.4186 | 0.5219 |
| GIHVEVPPAEAER                | 1404.6             | 2            | 2.8801 | 0.2134 |
| GIHVEVPPAEAERLGPLQVAR        | 2239.6             | 2            | 3.3428 | 0.2938 |
| GIIDPTKVVR                   | 1098.3             | 2            | 2.811  | 0.2671 |
| GIIDSTVGEHR                  | 1184.3             | 2            | 2.7194 | 0.3301 |
| GIIGYDV                      | 736.8              | 1            | 1.6491 | 0.1263 |
| GIIPNSFAHIFGHIK              | 1723.0             | 2            | 2.573  | 0.2665 |
| GIIRPGTAFELLEQAATGYVIDPIKGLK | 3043.5             | 3            | 5.9558 | 0.4267 |
| GIIVHTMAAVEALGAK             | 1581.9             | 2            | 2.9201 | 0.4659 |
| GIIWGEDTLMEYLENPKK           | 2137.4             | 2            | 4.9331 | 0.4379 |
| GIKGEEIVQQLIENSTTFR          | 2163.4             | 2            | 2.5422 | 0.2667 |
| GIKPVTLELGGK                 | 1212.5             | 3            | 4.0036 | 0.3655 |
| GIKTVFDEAIR                  | 1249.4             | 2            | 2.436  | 0.221  |
| GILAADESTGSIK                | 1333.5             | 2            | 4.8282 | 0.4686 |
| GILAADESTGSIKR               | 1489.7             | 2            | 4.5909 | 0.4831 |
| GILAADESVGSMK                | 1349.5             | 2            | 3.3448 | 0.343  |
| GILAADESVGTMGNR              | 1491.7             | 2            | 4.5467 | 0.4608 |
| GILDKEEAIAIKR                | 1472.7             | 3            | 4.5201 | 0.3868 |

| Peptide Sequence                         | Peptide mass (m/z) | Charge State | Xcorr  | DelCn2 |
|------------------------------------------|--------------------|--------------|--------|--------|
| GILEEPLPSTSSEEDPLAGISLPEGVDPSFLAALPDDIRR | 4334.7             | 3            | 3.5267 | 0.294  |
| GILEQQWQADSTTR                           | 1562.7             | 2            | 3.3132 | 0.2745 |
| GILEYLTVAEVVETMEDLVITYTK                 | 2618.0             | 2            | 4.3532 | 0.4739 |
| GILFVGSGVSGGEEGAR                        | 1592.7             | 2            | 5.8839 | 0.4458 |
| GILGYTEHQVVSSDFNSDTHSSTFDAGAGIALNDHFVK   | 4039.3             | 3            | 7.49   | 0.5886 |
| GILLFGPPGTGK                             | 1157.4             | 2            | 3.4544 | 0.2964 |
| GILLYGPPGTGK                             | 1173.4             | 2            | 3.4698 | 0.2052 |
| GILSGTSDLLLTDFDEAEVR                     | 2037.3             | 2            | 5.6106 | 0.4218 |
| GILSGTSDLLLTDFDEAEVRK                    | 2165.4             | 2            | 4.3275 | 0.292  |
| GILTLKYPIEHGIITNWDDMEK                   | 2588.0             | 2            | 4.2077 | 0.377  |
| GILTLKYPIEHGIITNWDDMEKIWHHTFYNELR        | 4085.6             | 3            | 5.9492 | 0.4937 |
| GILTLPKPVHFK                             | 1350.7             | 2            | 2.6634 | 0.1979 |
| GILTVDELLAIR                             | 1313.6             | 2            | 3.1144 | 0.2354 |
| GIMGEDTYPYQ GK                           | 1459.6             | 2            | 2.961  | 0.1887 |
| GINDSKDLPEEYLSAIYNEIAGK                  | 2540.8             | 3            | 3.5791 | 0.1617 |
| GINDSKDLPEEYLSAIYNEIAGKK                 | 2668.9             | 3            | 6.4505 | 0.427  |
| GINDSKDLPEEYLSSIYEEIEGKK                 | 2758.0             | 3            | 6.0918 | 0.4204 |
| GINTLVTYDMVPEPK                          | 1677.9             | 2            | 4.6675 | 0.4335 |
| GINVALANGK                               | 957.1              | 2            | 2.9003 | 0.2037 |
| GIPEFWFTIFR                              | 1413.6             | 2            | 2.9605 | 0.3742 |
| GIPEFWLTVFK                              | 1337.6             | 2            | 3.061  | 0.3259 |
| GIPHLVTHDAR                              | 1216.4             | 2            | 2.9341 | 0.3612 |
| GIPIEVIPMAYVPVSR                         | 1742.1             | 2            | 2.9209 | 0.2423 |
| GIPKQAPFRSPTAPSVFSPTGNRTPIPPSR           | 3162.6             | 3            | 3.9026 | 0.2078 |
| GIPLATGDTSPPELLPGAPLPPKKEVINGNIK         | 3333.8             | 3            | 5.2044 | 0.4832 |
| GIPVLVGLLDHPK                            | 1358.7             | 2            | 2.6748 | 0.2681 |
| GIPVLVGLLDHPKK                           | 1486.8             | 2            | 3.5105 | 0.3453 |
| GIPVLVGLLDHPKKEVHLGACGALK                | 2566.1             | 3            | 3.3566 | 0.3108 |
| GIQTSDPNAVVMGLAPEHFHYQILNQAFR            | 3255.7             | 3            | 3.5317 | 0.2602 |
| GIQVEIYSFPKDPEIHLSGPLEAGKPITVK           | 3264.8             | 3            | 5.2638 | 0.2345 |
| GIRHEVININLK                             | 1406.7             | 3            | 3.9069 | 0.2485 |
| GIRPAINVGLSVSR                           | 1439.7             | 2            | 3.38   | 0.3382 |
| GISCMNTTLESPFK                           | 1615.9             | 2            | 3.3972 | 0.215  |
| GISDLAQHYLMR                             | 1404.6             | 2            | 4.0673 | 0.385  |
| GISDLVLKEYLDNVQLGHILER                   | 2525.9             | 3            | 6.0755 | 0.5024 |
| GISEDSHLESLQDVGQSAAPTFMISPETITGTGK       | 3505.8             | 3            | 5.2706 | 0.3492 |

| Peptide Sequence                      | Peptide mass (m/z) | Charge State | Xcorr  | DelCn2 |
|---------------------------------------|--------------------|--------------|--------|--------|
| GISEDSHLESIQDVGQSAAPTFMISPETVTGTGK    | 3491.8             | 3            | 5.7991 | 0.2926 |
| GISEDSHLESIQDVGQSAAPTFMISPETVTGTGKK   | 3620.0             | 3            | 7.4458 | 0.5041 |
| GISEETTTGVHNLK                        | 1649.8             | 2            | 4.1763 | 0.4125 |
| GISEFIVMAADAEPLEIILHLLPLCEDKNVPYVFVR  | 4056.8             | 3            | 4.0598 | 0.1773 |
| GISHVIVDEIHER                         | 1504.7             | 2            | 4.2979 | 0.4571 |
| GISLNPEQWSQLK                         | 1500.7             | 2            | 4.1691 | 0.3063 |
| GISLNPEQWSQLKEQISDIDDAVR              | 2743.0             | 2            | 4.6058 | 0.418  |
| GISLNPEQWSQLKEQISDIDDAVRK             | 2871.2             | 3            | 3.974  | 0.2659 |
| GISLNPEQWSQLKEQISDIDDAVRKL            | 2984.3             | 3            | 3.2219 | 0.1817 |
| GISQEQMQEFR                           | 1353.5             | 2            | 3.6741 | 0.3699 |
| GISTKPVYIPEVELNHK                     | 1925.2             | 2            | 4.0372 | 0.3422 |
| GISTKPVYIPEVELNHKLIK                  | 2279.7             | 3            | 3.9282 | 0.2133 |
| GISVHISNAEPK                          | 1252.4             | 2            | 2.9477 | 0.2363 |
| GITEQQKEGLEIVK                        | 1572.8             | 2            | 3.5221 | 0.1627 |
| GITFDSGGISIK                          | 1195.3             | 2            | 3.0067 | 0.3783 |
| GITGVDLFGTTDAVVK                      | 1593.8             | 2            | 4.6811 | 0.4572 |
| GITGVDLFGTTDAVVVKHVLEGHDR             | 2537.8             | 3            | 4.7537 | 0.427  |
| GITGVEDKESWHGKPLPK                    | 1979.2             | 2            | 4.459  | 0.4163 |
| GITHIGYTDLPSR                         | 1430.6             | 2            | 4.4113 | 0.4673 |
| GITINAAHVEYSTAAR                      | 1674.8             | 2            | 5.4024 | 0.5102 |
| GITLHPELFSIDNGLLTPTMK                 | 2298.7             | 3            | 3.8237 | 0.2894 |
| GITSFLVDRDTPGLHIGKPENK                | 2395.7             | 3            | 4.9799 | 0.4133 |
| GITVTAYSPLGSPDRPWAKPEDPSLLEDPKIKEIAAK | 3992.5             | 3            | 3.8183 | 0.1428 |
| GIVAAQETQIQELAAANQESSHVQQALALEQQFLER  | 4079.4             | 3            | 5.524  | 0.4633 |
| GIVDLIEER                             | 1044.2             | 2            | 2.6588 | 0.1336 |
| GIVDQSQQAYQEAFEISK                    | 2042.2             | 2            | 6.155  | 0.5174 |
| GIVDQSQQAYQEAFEISKK                   | 2170.4             | 2            | 4.8303 | 0.4185 |
| GIVDSITGQR                            | 1046.2             | 2            | 2.598  | 0.2668 |
| GIVEESVTGVHR                          | 1283.4             | 2            | 3.097  | 0.4    |
| GIVEFASKPAAR                          | 1246.4             | 2            | 2.7832 | 0.3514 |
| GIVEFSGKPAAR                          | 1232.4             | 2            | 3.2251 | 0.4029 |
| GIVEQCCTSICSLYQLENYCN                 | 2384.7             | 2            | 4.1468 | 0.47   |
| GIVFEDVKVPK                           | 1231.5             | 2            | 2.8634 | 0.2854 |
| GIVFEDVKVPKENVLIGDGAGFK               | 2432.8             | 3            | 4.815  | 0.4413 |
| GIVKDIIHDPGR                          | 1320.5             | 2            | 3.7754 | 0.3395 |
| GIVKDIIHDPGRGAPLAK                    | 1858.2             | 2            | 4.0066 | 0.374  |

| Peptide Sequence                   | Peptide mass (m/z) | Charge State | Xcorr  | DelCn2 |
|------------------------------------|--------------------|--------------|--------|--------|
| GIVLLELLPK                         | 1224.5             | 2            | 3.7413 | 0.1923 |
| GIVNAVKDPDANGK                     | 1398.5             | 2            | 3.7882 | 0.3733 |
| GIVNEQFLLQR                        | 1317.5             | 2            | 3.0506 | 0.1492 |
| GIVNGAAPELVPVPTGGPAVGAR            | 2001.3             | 2            | 4.8022 | 0.4634 |
| GIVQNLHSMLPIQQQLQEWGVER            | 2577.0             | 3            | 3.2911 | 0.1269 |
| GIVVGIKLDQGGAPLAGTNKETTIQGLDGLSER  | 3309.7             | 3            | 6.549  | 0.531  |
| GIVVGIKVDKGVVPLAGTDGETTTQGLDGLSER  | 3283.7             | 3            | 3.2743 | 0.2603 |
| GIVVTAYSPLGSPDRPWAKPEDPSLLEDPR     | 3264.6             | 3            | 4.4634 | 0.4009 |
| GIVVYTGDR                          | 980.1              | 2            | 2.9532 | 0.2666 |
| GIVYDTGGLSIK                       | 1223.4             | 2            | 2.8212 | 0.2996 |
| GIYAYGF EKPSAIQQR                  | 1829.0             | 2            | 4.8728 | 0.4897 |
| GIYKDDIAQVDYVEPSQNTISLK            | 2597.9             | 3            | 4.8323 | 0.1766 |
| GIYTLNEHDKYNIR                     | 1736.9             | 2            | 2.6556 | 0.1885 |
| GKADAGKDGNNPAK                     | 1343.4             | 2            | 4.0877 | 0.3188 |
| GKADAGKEGNNPAENGD AK               | 1843.9             | 2            | 4.2866 | 0.436  |
| GKADAGKEGNNPAENGD AKTDQAQK         | 2515.6             | 3            | 3.9161 | 0.1493 |
| GKADAGKEGNNPAENGD AKTDQAQKAEGAGDAK | 3215.3             | 3            | 3.4129 | 0.1298 |
| GKAEEQAVR                          | 988.1              | 2            | 3.1034 | 0.1753 |
| GKAHAAVWNAQEAQADFAK                | 2014.2             | 3            | 4.4362 | 0.274  |
| GKATISNDGATILK                     | 1389.6             | 3            | 4.3134 | 0.406  |
| GKDAFPVAGQK                        | 1118.3             | 2            | 3.0608 | 0.2365 |
| GKDEAMAIGGHWSPLDGPDPPEKDPSVLIK     | 3148.5             | 3            | 4.3918 | 0.382  |
| GKDFLALALLDGR                      | 1389.6             | 2            | 2.7684 | 0.1703 |
| GKDGVGAVMDSMELER                   | 1694.9             | 2            | 2.8672 | 0.1689 |
| GKDHVV SDFSEHGSLK                  | 1742.9             | 2            | 5.1476 | 0.4859 |
| GKDIGKPIEK                         | 1085.3             | 2            | 2.4322 | 0.1292 |
| GKDILYIGDHIFGDILK                  | 1918.2             | 3            | 4.7182 | 0.3106 |
| GKDKEYAEIIRK                       | 1450.7             | 3            | 3.4313 | 0.1225 |
| GKDLIGVQNLLK                       | 1298.6             | 2            | 2.8023 | 0.1259 |
| GKDLIGVQNLLKK                      | 1426.7             | 2            | 3.8466 | 0.2883 |
| GKDMVVDIQR                         | 1161.4             | 2            | 3.0279 | 0.1669 |
| GKDSL YAQ GK                       | 1067.2             | 2            | 3.2526 | 0.204  |
| GKDSL YAQ GR                       | 1095.2             | 2            | 3.6975 | 0.3721 |
| GKDSYETS QLDDQSAETHSHK             | 2364.4             | 3            | 5.8437 | 0.508  |
| GKDSYETS QLDDQSAETHSHKQS           | 2579.6             | 3            | 5.0673 | 0.302  |
| GKDYYQTLGLAR                       | 1385.6             | 2            | 3.0776 | 0.2636 |

| Peptide Sequence                        | Peptide mass (m/z) | Charge State | Xcorr  | DelCn2 |
|-----------------------------------------|--------------------|--------------|--------|--------|
| GKEADKEINK                              | 1132.2             | 2            | 3.1672 | 0.223  |
| GKEALESEFR                              | 1166.3             | 2            | 3.1095 | 0.3175 |
| GKEDEGEEAASPMLQIQR                      | 1989.2             | 2            | 6.3499 | 0.3709 |
| GKEFEFSQLPLKVEFLECSAK                   | 2430.8             | 2            | 3.9284 | 0.2057 |
| GKEGQLGHGDVLPRL                         | 1463.6             | 2            | 3.29   | 0.3393 |
| GKEGSALSHVR                             | 1141.3             | 2            | 2.4731 | 0.2346 |
| GKEGSALTEGAKEEGGEEVAK                   | 2077.2             | 2            | 6.2706 | 0.4246 |
| GKEHDDIFDK                              | 1204.3             | 2            | 3.0313 | 0.2817 |
| GKEHDDIFDKLK                            | 1445.6             | 2            | 3.759  | 0.3146 |
| GKELDSNPFASLVFYWEPLNR                   | 2483.8             | 2            | 3.6899 | 0.3245 |
| GKELFIQQR                               | 1248.4             | 2            | 3.0522 | 0.1695 |
| GKELQPGSHIQSDKEIDAFVR                   | 2355.6             | 3            | 4.6048 | 0.3255 |
| GKELSGLSALKNPFGNAGLLLGEAGK              | 2600.0             | 3            | 6.919  | 0.3576 |
| GKESEKELALVKR                           | 1487.7             | 2            | 4.1111 | 0.4115 |
| GKEVDNFVDKLLK                           | 1392.6             | 2            | 3.4741 | 0.2359 |
| GKEVDNFVDKLLKSEGETIMSSSMGKR             | 2874.2             | 3            | 3.823  | 0.3058 |
| GKFEDMAK                                | 926.1              | 1            | 2.0544 | 0.11   |
| GKFGHEFLEFEFRPDGK                       | 2041.3             | 2            | 4.839  | 0.3991 |
| GKFIYITPEELAAVANFIR                     | 2153.5             | 2            | 5.1657 | 0.4299 |
| GKFLEMCNDLLAR                           | 1510.8             | 2            | 2.536  | 0.1524 |
| GKFNFYPYKIDDILSAPDLQK                   | 2310.6             | 3            | 5.2955 | 0.3842 |
| GKFPVQLENVDSFVELGQVALR                  | 2446.8             | 3            | 3.7823 | 0.2687 |
| GKFQDNFEFIQWFK                          | 1835.1             | 2            | 4.3144 | 0.4315 |
| GKFQDNFEFVQWFK                          | 1821.0             | 2            | 3.2604 | 0.1686 |
| GKFQDNFEFVQWFKK                         | 1949.2             | 3            | 3.7726 | 0.3437 |
| GKFSEGEATLR                             | 1195.3             | 2            | 3.0823 | 0.3149 |
| GKGASGSFVVVQK                           | 1264.5             | 2            | 4.144  | 0.4278 |
| GKGDKAQIEKR                             | 1230.4             | 2            | 3.5719 | 0.2588 |
| GKGDKAQLEKR                             | 1230.4             | 2            | 3.2006 | 0.2554 |
| GKGEGLDLSQLSK                           | 1219.3             | 2            | 2.5352 | 0.1642 |
| GKGEITPAAIQK                            | 1213.4             | 2            | 3.1793 | 0.2329 |
| GKGFSVVADTPELQR                         | 1604.8             | 2            | 4.6628 | 0.429  |
| GKGGEIQPVSVK                            | 1199.4             | 2            | 3.9903 | 0.3332 |
| GKGGTQVDTEIEEKDEETKAFFALLSNIVKPVASDIQAR | 4218.6             | 3            | 5.2901 | 0.3608 |
| GKGIYLWDVEGR                            | 1393.6             | 2            | 3.1505 | 0.367  |
| GKGLLNAIVIK                             | 1126.4             | 2            | 3.4452 | 0.2665 |



| Peptide Sequence              | Peptide mass (m/z) | Charge State | Xcorr  | DelCn2 |
|-------------------------------|--------------------|--------------|--------|--------|
| GKGPLKNTSDVISAAK              | 1586.8             | 2            | 3.8003 | 0.4446 |
| GKGPLKNTSDVISAAKK             | 1715.0             | 3            | 3.4075 | 0.1093 |
| GKGSLEVLNLKDVEEGDEKFE         | 2336.5             | 2            | 5.551  | 0.477  |
| GKGYDAYLKR                    | 1334.5             | 2            | 3.2034 | 0.3774 |
| GKHGFSDNQK                    | 1118.2             | 2            | 2.547  | 0.1949 |
| GKIEEAVNAFK                   | 1206.4             | 2            | 3.3472 | 0.2493 |
| GKIEEAVNAFKELVR               | 1704.0             | 2            | 3.2719 | 0.278  |
| GKIEEDSEVLMMIK                | 1622.9             | 2            | 4.5668 | 0.344  |
| GKIFHIDTNALHVPR               | 1719.0             | 2            | 3.5072 | 0.339  |
| GKITDLANLSAANHDAIIFPGGFGAAK   | 2628.9             | 3            | 5.7152 | 0.5192 |
| GKITFADFHR                    | 1192.4             | 2            | 3.1703 | 0.2969 |
| GKIYSLNEGYAKDFDPAVTEYIQR      | 2779.1             | 3            | 4.3491 | 0.3443 |
| GKKEEKQEAGK                   | 1232.4             | 2            | 2.7496 | 0.1763 |
| GKKEEKQEAGKEGTEN              | 1762.9             | 2            | 4.2112 | 0.2235 |
| GKKPIEDPANDTVDFPK             | 1872.1             | 3            | 3.9779 | 0.3112 |
| GKKPIEDPANDTVDFPKR            | 2028.3             | 3            | 4.6487 | 0.401  |
| GKLDGNQDLIR                   | 1229.4             | 2            | 3.38   | 0.248  |
| GKLDVQFSGGTK                  | 1293.5             | 2            | 2.8951 | 0.2101 |
| GKLEAITPPPAK                  | 1335.6             | 2            | 4.1086 | 0.3423 |
| GKLEAITPPPAKK                 | 1463.8             | 2            | 4.4356 | 0.3086 |
| GKLEQHLTGR                    | 1139.3             | 2            | 2.9682 | 0.1938 |
| GKLGELVDGLVVPALVTAILEAPVTEPR  | 2945.4             | 3            | 4.4535 | 0.3568 |
| GKLGLVGVNLTLDGVK              | 1583.9             | 3            | 4.819  | 0.4738 |
| GKLHVLLFK                     | 1055.3             | 2            | 2.8367 | 0.1927 |
| GKLHVLLFKEEGEVPASAFQK         | 2328.7             | 3            | 5.5893 | 0.3817 |
| GKLLATQTAAELSK                | 1431.7             | 2            | 3.5613 | 0.3954 |
| GKLLSNDEVTIK                  | 1317.5             | 2            | 3.496  | 0.2933 |
| GKLNHLGADFVK                  | 1402.6             | 2            | 3.5989 | 0.3198 |
| GKLPIVNEDELVAIAR              | 1966.3             | 2            | 4.0025 | 0.3553 |
| GKMSSYAFFVQTCR                | 1625.9             | 2            | 3.18   | 0.3305 |
| GKNASDMPETITSR                | 1507.7             | 2            | 3.8933 | 0.3399 |
| GKNASELFPVVK                  | 1360.6             | 2            | 3.3095 | 0.3396 |
| GKNENESEKR                    | 1191.2             | 2            | 2.4681 | 0.1602 |
| GKNLFFSTNIDDAIKEADLVFISVNTPTK | 3199.6             | 3            | 7.7154 | 0.5766 |
| GKNNTVGLIQLNRPK               | 1652.9             | 2            | 4.4451 | 0.394  |
| GKNPEDLIWHTPEGISIKPLYSK       | 2624.0             | 3            | 4.7194 | 0.3388 |

| Peptide Sequence            | Peptide mass (m/z) | Charge State | Xcorr  | DelCn2 |
|-----------------------------|--------------------|--------------|--------|--------|
| GKNVIHPFLSR                 | 1268.5             | 2            | 3.1856 | 0.2652 |
| GKNVLINKDIR                 | 1270.5             | 3            | 3.4333 | 0.2666 |
| GKNVVHQLSVTLEDLYNGATR       | 2315.6             | 3            | 3.9329 | 0.1464 |
| GKNVVHQLSVTLEDLYNGVTK       | 2315.6             | 3            | 3.5084 | 0.1477 |
| GKPASGAGAGAGAGK             | 1157.3             | 2            | 2.8679 | 0.3437 |
| GKPASGAGAGAGAGKR            | 1313.4             | 2            | 2.9763 | 0.4264 |
| GKPAVAALGDLTDLPTYEHIQTALSSK | 2798.1             | 3            | 5.1312 | 0.3997 |
| GKPIHHFLGTSTFSQYTVVDENAVAK  | 2848.2             | 3            | 5.1907 | 0.4017 |
| GKPSSDTPKPK                 | 1241.4             | 2            | 2.6133 | 0.2588 |
| GKPTASIEAR                  | 1159.3             | 2            | 2.5992 | 0.137  |
| GKQAEVANQETK                | 1303.4             | 2            | 4.0207 | 0.3022 |
| GKQAEVANQETKEDLPAENGETK     | 2487.6             | 3            | 3.7149 | 0.2042 |
| GKQDFLKEIVETFANK            | 1868.1             | 2            | 4.9881 | 0.4423 |
| GKQDIGDILQQIMTITDQSLDEAQAQK | 2861.2             | 3            | 3.9211 | 0.1576 |
| GKQEIENLKEEVESLNSLINDLQK    | 2772.1             | 3            | 5.6223 | 0.3508 |
| GKQFAQALR                   | 1019.2             | 2            | 2.5658 | 0.259  |
| GKQFAQALRK                  | 1147.4             | 2            | 2.6593 | 0.1949 |
| GKQLIVANAGDSR               | 1329.5             | 2            | 3.4657 | 0.2952 |
| GKQTMQVDEHARPQTTLLEQLQK     | 2567.9             | 3            | 4.3135 | 0.2763 |
| GKSETILSPPPEK               | 1383.6             | 2            | 3.7855 | 0.3782 |
| GKSETILSPPPEKR              | 1539.8             | 2            | 3.8768 | 0.3325 |
| GKSGPLFNFDVHDDVR            | 1804.0             | 2            | 2.9551 | 0.1799 |
| GKSLESLDTSLFAK              | 1496.7             | 2            | 3.4038 | 0.2692 |
| GKSPGIIFIPGYLSYMNGTK        | 2144.5             | 3            | 3.4006 | 0.2057 |
| GKSTEEARKELQAAGK            | 1703.9             | 2            | 4.1681 | 0.3326 |
| GKSTEEARKELQAAGKSPEDLER     | 2530.7             | 3            | 4.7546 | 0.3428 |
| GKTEAYLEAIR                 | 1251.4             | 2            | 3.1892 | 0.2727 |
| GKTEAYLEAIRK                | 1379.6             | 3            | 4.2363 | 0.2253 |
| GKTEQQTADQLLAR              | 1559.7             | 2            | 3.7112 | 0.298  |
| GKTHSQLLIIDR                | 1381.6             | 3            | 3.3923 | 0.3421 |
| GKTVGFGTNNSEHITYLEHNPYEK    | 2736.9             | 3            | 3.4819 | 0.1736 |
| GKTVPEELVKPEELSK            | 1784.0             | 2            | 4.7748 | 0.3592 |
| GKVLIDIR                    | 914.1              | 2            | 2.6121 | 0.1481 |
| GKVPITYLELLN                | 1360.6             | 2            | 3.5963 | 0.3249 |
| GKVQFQGKK                   | 1020.2             | 2            | 2.7248 | 0.1845 |
| GKVRDKLNNLVLFDK             | 1760.1             | 3            | 4.109  | 0.2579 |

| Peptide Sequence                       | Peptide mass (m/z) | Charge State | Xcorr  | DelCn2 |
|----------------------------------------|--------------------|--------------|--------|--------|
| GKWERPFEVKDTEEDFHVDQVTTVK              | 3150.4             | 3            | 6.7831 | 0.4175 |
| GKWKPPMIDNPSYQGIWKPR                   | 2399.8             | 3            | 3.2372 | 0.2031 |
| GKYKEELIEK                             | 1237.4             | 2            | 3.4343 | 0.2081 |
| GKYKEETIEK                             | 1225.4             | 3            | 3.5198 | 0.2532 |
| GKYLELLGYR                             | 1212.4             | 2            | 3.173  | 0.166  |
| GKYSEVFEAINITNNEK                      | 1957.1             | 2            | 3.2188 | 0.2507 |
| GKYYAVNYPLRDGIDDESIEAIFKPVMSK          | 3370.8             | 3            | 4.6513 | 0.2183 |
| GLAAALENKR                             | 1043.2             | 2            | 2.9087 | 0.1969 |
| GLAAGDAIAEIRR                          | 1313.5             | 2            | 2.487  | 0.2229 |
| GLAAHYFFPR                             | 1179.4             | 2            | 2.9691 | 0.4434 |
| GLAEPGSFLDYPSTEPQPGPELPPGDGALEPETPMLPR | 3961.4             | 3            | 3.6777 | 0.3156 |
| GLAFIQDPDGYWIEILNPNK                   | 2304.6             | 2            | 6.0973 | 0.4269 |
| GLAFTDVDVDSIK                          | 1380.5             | 2            | 3.9302 | 0.4175 |
| GLAGAVSELLR                            | 1086.3             | 2            | 3.7783 | 0.2454 |
| GLAGLGDVAEVR                           | 1157.3             | 2            | 3.0457 | 0.19   |
| GLAGLGDVAEVRK                          | 1285.5             | 2            | 3.3944 | 0.305  |
| GLAITFVSDENDAK                         | 1480.6             | 2            | 5.3202 | 0.4502 |
| GLAPDLPEDLYHLIK                        | 1695.0             | 2            | 4.0919 | 0.3863 |
| GLAPDLPEDLYHLIKK                       | 1823.1             | 2            | 3.707  | 0.2957 |
| GLAPEQPVTLR                            | 1181.4             | 2            | 2.7608 | 0.3302 |
| GLAPEVADRIGDYVQQHGGVSLVEQLLQDPK        | 3333.7             | 3            | 5.1957 | 0.35   |
| GLAPVQAYLHIPDIIK                       | 1749.1             | 2            | 3.5385 | 0.1941 |
| GLAVFISDIR                             | 1091.3             | 2            | 4.0128 | 0.3165 |
| GLCGAIHSSIAK                           | 1157.4             | 2            | 3.4271 | 0.302  |
| GLDAHLEQIFQEAHGMVAR                    | 2123.4             | 3            | 5.5408 | 0.3867 |
| GLDDSTGGTPLTPAAR                       | 1529.6             | 2            | 2.613  | 0.1538 |
| GLDGAVDMGAR                            | 1062.2             | 2            | 3.5018 | 0.3961 |
| GLDIKQEELGDLVDKEMAATSAAIETATAR         | 3148.5             | 3            | 4.7621 | 0.3485 |
| GLDISHISQR                             | 1126.2             | 2            | 3.3427 | 0.3045 |
| GLDISNVKHVINFDLPSDIEEYVHR              | 2911.2             | 3            | 6.0814 | 0.3613 |
| GLDKLEENLPILQQPTEK                     | 2066.3             | 2            | 5.2235 | 0.3549 |
| GLDLGGRGGVQVPAVDISSSLGGR               | 2268.5             | 3            | 5.3874 | 0.3022 |
| GLDPARVNVPIGGHAGK                      | 1758.0             | 3            | 4.542  | 0.3108 |
| GLDPYNVLAPK                            | 1187.4             | 2            | 3.2983 | 0.3163 |
| GLDQDHAR                               | 911.9              | 2            | 2.5236 | 0.2641 |
| GLDRIEERLPILNQPSTQIVANAK               | 2677.1             | 3            | 3.972  | 0.2104 |

| Peptide Sequence                       | Peptide mass (m/z) | Charge State | Xcorr  | DelCn2 |
|----------------------------------------|--------------------|--------------|--------|--------|
| GLDSNKNEVNHAIDR                        | 1682.8             | 2            | 2.6001 | 0.319  |
| GLD TVVALLADVVLQPR                     | 1780.1             | 2            | 3.6598 | 0.2391 |
| GLDVDSLVIHQVVK                         | 1780.0             | 2            | 4.8421 | 0.3862 |
| GLDVDSLVIHQVVKAPK                      | 2076.4             | 2            | 3.9806 | 0.2903 |
| GLDVEDVK                               | 875.0              | 1            | 2.0088 | 0.2083 |
| GLDVEDVKFVINVDYDYPNSSEDIHR             | 2989.2             | 3            | 5.9511 | 0.2776 |
| GLDVEDVKFVINVDYDYPNSSEDIYVHR           | 2975.2             | 3            | 4.8603 | 0.4614 |
| GLDVPQVSLIINYDLPNNR                    | 2141.4             | 2            | 5.1025 | 0.4333 |
| GLDVPQVSLIINYDLPNNRELYIHR              | 2953.3             | 3            | 3.3545 | 0.1312 |
| GLDYTGVIYEAVLLQTPAQAGEEPLGVGSVAAGGR    | 3624.0             | 3            | 4.2375 | 0.3316 |
| GLEAAQIKELEELRQTVK                     | 2056.3             | 3            | 3.4616 | 0.2385 |
| GLEDRVPSVESLLDELESSVSPVPAITVNDQEMSSPQR | 4151.6             | 3            | 3.7537 | 0.208  |
| GLEETVAKELQTLHNLR                      | 1952.2             | 2            | 4.447  | 0.41   |
| GLEETVAKELQTLHNLRK                     | 2080.4             | 2            | 2.6774 | 0.2053 |
| GLEFPMTDLMLSPIHTPQR                    | 2299.7             | 2            | 4.2819 | 0.3915 |
| GLEHVTVDLVAEITPK                       | 1837.1             | 2            | 4.7507 | 0.4379 |
| GLEISGTFTR                             | 1081.2             | 2            | 3.2485 | 0.3648 |
| GLELEPGAGLFVAQAGGADPDKFQGVIK           | 3099.5             | 3            | 3.4603 | 0.2576 |
| GLEMALLPHLHEHNLVK                      | 1952.3             | 2            | 3.786  | 0.2585 |
| GLEQLLVGGSHLK                          | 1351.6             | 2            | 3.8148 | 0.2592 |
| GLEQLLVGGSHLKENK                       | 1723.0             | 3            | 3.9206 | 0.3701 |
| GLESDVAELR                             | 1089.2             | 2            | 3.6052 | 0.2769 |
| GLESDVAELRAQLAKAEDGHAVAK               | 2479.7             | 3            | 3.9149 | 0.1248 |
| GLSLPPLRPQQNPVLPVAGER                  | 2368.7             | 2            | 2.6491 | 0.1352 |
| GLETTATYDPETQEFILNSPTVTSIK             | 2857.1             | 3            | 3.7167 | 0.1706 |
| GLEVTAYSPLGSSDR                        | 1552.7             | 2            | 4.6567 | 0.5023 |
| GLEVTDDSPK                             | 1061.1             | 2            | 2.6991 | 0.2382 |
| GLFDEEMNEILTDPSSDTK                    | 2170.3             | 2            | 3.9182 | 0.1987 |
| GLFDEYGSK                              | 1016.1             | 2            | 2.6532 | 0.3809 |
| GLFDEYGSKK                             | 1144.3             | 2            | 2.5347 | 0.1632 |
| GLFDEYGSKKSDYIK                        | 1750.9             | 2            | 3.5842 | 0.3481 |
| GLFGGGAQSLDREELFGESSGK                 | 2329.5             | 3            | 3.6403 | 0.2775 |
| GLFHHISK                               | 939.1              | 2            | 2.4745 | 0.2643 |
| GLFIIDDK                               | 921.1              | 2            | 2.9504 | 0.17   |
| GLFIIDDKGILR                           | 1360.6             | 2            | 3.821  | 0.3747 |
| GLFIIDDKGILRQITVNDLPVGR                | 2554.0             | 3            | 5.117  | 0.4807 |

| Peptide Sequence                       | Peptide mass (m/z) | Charge State | Xcorr  | DelCn2 |
|----------------------------------------|--------------------|--------------|--------|--------|
| GLFIIDGKGVLR                           | 1288.6             | 2            | 3.2296 | 0.2428 |
| GLFIIDPNGVIK                           | 1286.5             | 2            | 3.4134 | 0.1982 |
| GLFIIDPNGVIKHLVNDLPVGR                 | 2474.9             | 3            | 5.1308 | 0.4259 |
| GLFLPEDENLREK                          | 1560.7             | 2            | 3.448  | 0.1311 |
| GLFSAITRPTAVNSLISK                     | 1876.2             | 2            | 3.2103 | 0.2243 |
| GLFSSDSGIEMTPAESTEVENK                 | 2200.4             | 2            | 6.056  | 0.4527 |
| GLFSSDSGIEMTPAESTEVENKILADPLDQMKAEEAYK | 3888.3             | 3            | 3.7509 | 0.2689 |
| GLFTGLTPR                              | 962.1              | 2            | 2.8334 | 0.3046 |
| GLGAFVIDSDHLGHR                        | 1594.8             | 2            | 3.9885 | 0.4675 |
| GLGAGAGAGEESPATSLPR                    | 1698.8             | 2            | 4.679  | 0.3373 |
| GLGAVILVHAENGLIAQEQKR                  | 2332.6             | 3            | 4.1062 | 0.3768 |
| GLGDHDLKVHDSNIYIKPFLSSAPEVR            | 3009.4             | 3            | 5.1923 | 0.3571 |
| GLGDRPAPK                              | 911.0              | 2            | 2.4437 | 0.1183 |
| GLGDSGSEGHSSLSSHSNSEELAAAAK            | 2586.6             | 3            | 5.259  | 0.38   |
| GLGEFTPLYPMLFGGGQER                    | 2070.4             | 2            | 4.5398 | 0.4503 |
| GLGGEVPGSHQGPDPYR                      | 1723.8             | 2            | 4.0837 | 0.3635 |
| GLGGEVPGSHQGPDPYRQLR                   | 2121.3             | 2            | 3.2132 | 0.1562 |
| GLGGILLEDIEEALPNSQK                    | 1997.2             | 2            | 4.8183 | 0.3965 |
| GLGGLIVVSK                             | 943.2              | 2            | 2.4122 | 0.1479 |
| GLGHQVATDALVAMEK                       | 1640.9             | 2            | 5.0478 | 0.3521 |
| GLGILSLKQEMMAALTDAIQDKK                | 2604.1             | 3            | 4.8908 | 0.3582 |
| GLGLDDALEPR                            | 1156.3             | 2            | 3.3638 | 0.317  |
| GLGMTLSYLFR                            | 1258.5             | 2            | 2.9137 | 0.3481 |
| GLGSTVQEIDLTGVK                        | 1517.7             | 2            | 4.2257 | 0.4424 |
| GLGSTVQEIDLTGVKLVLPK                   | 2068.4             | 2            | 2.6543 | 0.1334 |
| GLGTDDNTLIR                            | 1175.3             | 2            | 3.5775 | 0.417  |
| GLGTDEDAIISVLAYR                       | 1693.9             | 2            | 5.7327 | 0.5116 |
| GLGTDEDSLIEIICSR                       | 1721.9             | 2            | 4.5466 | 0.4662 |
| GLGTDEDTIIDITHR                        | 1769.9             | 2            | 5.3229 | 0.4545 |
| GLGTDEDTLIEILASR                       | 1703.9             | 2            | 5.509  | 0.3713 |
| GLGTDEESILTLTISR                       | 1705.9             | 2            | 5.577  | 0.5026 |
| GLGVEIAK                               | 786.9              | 1            | 1.6071 | 0.14   |
| GLGVEIAKNILGGVK                        | 1581.9             | 2            | 4.3254 | 0.387  |
| GLGVHLSFVR                             | 1085.3             | 2            | 3.0106 | 0.3047 |
| GLGWVQFSSEEGLR                         | 1565.7             | 2            | 3.5468 | 0.3171 |
| GLGWVQFSSEEGLRNALQQENHIIDGVK           | 3126.4             | 3            | 5.0069 | 0.3016 |

| Peptide Sequence                  | Peptide mass (m/z) | Charge State | Xcorr  | DelCn2 |
|-----------------------------------|--------------------|--------------|--------|--------|
| GLHEAHQLYGR                       | 1281.4             | 2            | 2.8935 | 0.3062 |
| GLHGPLTLNSPLTPEKIR                | 1944.3             | 2            | 3.8831 | 0.5285 |
| GLHLQALKPTKPGLLPSLFK              | 2159.6             | 2            | 4.0804 | 0.2971 |
| GLHNVVYGIQR                       | 1256.4             | 2            | 2.7646 | 0.2524 |
| GLHPRPQAVLSEQQNGLAVGGGEK          | 2443.7             | 3            | 5.2264 | 0.3314 |
| GLHQSIEEFR                        | 1216.3             | 2            | 3.6419 | 0.3035 |
| GLHVVEVTYDDVPIPNPSPFK             | 2227.5             | 2            | 5.1048 | 0.4606 |
| GLIAAICAGPTALLAHEIGFGSK           | 2211.6             | 2            | 6.2656 | 0.5958 |
| GLIDGVVEADLVEALQEFGPISYVVVMPK     | 3089.6             | 3            | 7.0541 | 0.4952 |
| GLIENPALLR                        | 1096.3             | 2            | 3.3763 | 0.2006 |
| GLIEVKTDEFPR                      | 1404.6             | 2            | 3.0375 | 0.37   |
| GLIHPDDSVK                        | 1081.2             | 2            | 2.5897 | 0.3646 |
| GLILKDHGIR                        | 1122.3             | 2            | 3.0756 | 0.3308 |
| GLIPSSPQNEPTASVPPESDVYR           | 2441.6             | 2            | 3.5315 | 0.2483 |
| GLISKQPGTCDPYVKISLIPEDSR          | 2618.0             | 3            | 3.3259 | 0.1013 |
| GLIVYQLENQPSEFR                   | 1794.0             | 2            | 3.2996 | 0.2452 |
| GLIVYQLENQPSEFRR                  | 1950.2             | 3            | 4.1569 | 0.2485 |
| GLKAELMER                         | 1047.3             | 2            | 2.6731 | 0.2035 |
| GLKDNFADVQSVVDCPDLTKEPFTFPVKGICGK | 3669.2             | 3            | 4.0066 | 0.1892 |
| GLKEGIPALDNFLDK                   | 1630.9             | 2            | 2.6738 | 0.1961 |
| GLKEGIPALDNFLDKL                  | 1744.0             | 2            | 4.4583 | 0.3822 |
| GLKLTFDSSFSPNTGKK                 | 1828.1             | 2            | 4.5821 | 0.4571 |
| GLKNVFDEAILAALEPPEPK              | 2152.5             | 2            | 5.4044 | 0.5231 |
| GLKNVFDEAILAALEPPEPKK             | 2280.6             | 3            | 4.8478 | 0.4406 |
| GLKSGENFKLLYDLADQLHAAVGASR        | 2775.1             | 3            | 5.8576 | 0.4517 |
| GLKTLENLLASIR                     | 1428.7             | 2            | 3.5936 | 0.3058 |
| GLKYELISETGGSHDKR                 | 1891.1             | 2            | 4.9534 | 0.4568 |
| GLKYQEGGVESAFHK                   | 1650.8             | 3            | 4.608  | 0.3242 |
| GLLEFEHQQR                        | 1129.3             | 2            | 3.2645 | 0.156  |
| GLLENELKLMEEFVK                   | 1793.1             | 2            | 4.2672 | 0.3547 |
| GLLGDAPNDPRGGTLLSVTGEVEPR         | 2521.8             | 3            | 4.3251 | 0.2931 |
| GLLGELILLQQIQEHEEEARR             | 2603.9             | 3            | 3.2624 | 0.2501 |
| GLLHPQQLHLLSR                     | 1512.8             | 2            | 3.9248 | 0.3551 |
| GLLLFVDEADAFLR                    | 1579.8             | 2            | 5.3893 | 0.5031 |
| GLLLYGPPGTGK                      | 1173.4             | 2            | 3.3042 | 0.3146 |
| GLLNDAFQKGGPEGATTR                | 1833.0             | 3            | 3.2904 | 0.1657 |

| Peptide Sequence                      | Peptide mass (m/z) | Charge State | Xcorr  | DelCn2 |
|---------------------------------------|--------------------|--------------|--------|--------|
| GLLPEELTPLILATQK                      | 1737.1             | 2            | 4.3583 | 0.3851 |
| GLLPGLLPAPADKLTPK                     | 1702.1             | 2            | 4.0827 | 0.4082 |
| GLLQSGQIPGR                           | 1126.3             | 2            | 2.7249 | 0.1421 |
| GLLQTEPQNNQAK                         | 1441.6             | 2            | 3.1823 | 0.164  |
| GLLRPHVPPAAITTLAR                     | 1784.1             | 2            | 3.0826 | 0.1882 |
| GLLSDSMTDVPVDTGVAAR                   | 1905.1             | 2            | 5.3473 | 0.4024 |
| GLLSQGSPLSWEETKR                      | 1789.0             | 2            | 3.4885 | 0.26   |
| GLLSSLDHTSIR                          | 1299.5             | 2            | 3.0985 | 0.4049 |
| GLLTIRYPMEHGVVR                       | 1742.1             | 3            | 3.3841 | 0.3197 |
| GLLTYTSWEDALSR                        | 1612.8             | 2            | 4.2805 | 0.1744 |
| GLNISAVR                              | 830.0              | 2            | 2.6606 | 0.1708 |
| GLNSQSSDDHLNKR                        | 1571.6             | 2            | 2.612  | 0.1173 |
| GLNTIPLFVQLLYSPIENIQR                 | 2429.8             | 3            | 5.4433 | 0.5017 |
| GLNVDQLNMLGEK                         | 1431.6             | 2            | 3.1558 | 0.1869 |
| GLPDFASFSAKL                          | 1253.4             | 2            | 3.1006 | 0.369  |
| GLPDNISSVLNK                          | 1257.4             | 2            | 2.8479 | 0.2071 |
| GLPDNISSVLNKLVVVK                     | 1796.1             | 2            | 3.5191 | 0.283  |
| GLPEGFAHPK                            | 1053.2             | 2            | 2.5796 | 0.2432 |
| GLPFEAENKHVIDFFK                      | 1892.1             | 2            | 3.8594 | 0.3977 |
| GLPFQANAQDIINFFAPLKPVR                | 2457.9             | 2            | 4.4308 | 0.3575 |
| GLPFRATENDIANFFSPLNPIR                | 2490.8             | 3            | 4.7169 | 0.4073 |
| GLPLFPLVKPHINFMAAKL                   | 2107.6             | 2            | 2.7404 | 0.2277 |
| GLPLLVALLDHPR                         | 1414.7             | 2            | 3.7646 | 0.3342 |
| GLPLLVALLDHPRAEVR                     | 1870.2             | 2            | 2.6082 | 0.1616 |
| GLPLVDDGGWNTVPIISK                    | 1769.0             | 2            | 4.2221 | 0.3604 |
| GLPQLGTLGAGNHYAEIQVVDEIFNEYAAK        | 3219.5             | 3            | 4.8791 | 0.3327 |
| GLPSPYNMSSAPGSR                       | 1521.7             | 2            | 2.4938 | 0.2172 |
| GLPTGDSPLGPMTHR                       | 1536.7             | 2            | 3.6936 | 0.3476 |
| GLPVLVELLQSETDKVVR                    | 1996.3             | 2            | 3.9276 | 0.3494 |
| GLPWSCSVEDVQNFLSDCTIHDGAAGVHFIYTR     | 3640.0             | 3            | 4.4681 | 0.3601 |
| GLPYKATENDIYNFFSPLNPVR                | 2556.9             | 3            | 5.3013 | 0.4993 |
| GLPYRATENDIYNFFSPLNPMR                | 2616.9             | 3            | 4.9857 | 0.3678 |
| GLPYRATENDIYNFFSPLNPVR                | 2584.9             | 2            | 4.1559 | 0.4374 |
| GLQAQIASSGLTVEVDAPK                   | 1885.1             | 2            | 6.315  | 0.5015 |
| GLQATQLAR                             | 958.1              | 2            | 3.1054 | 0.2343 |
| GLQDLKQQVEGTAQEAVSAAGAAAQQVVDQATEAGQK | 3698.0             | 3            | 3.9666 | 0.1276 |

| Peptide Sequence                  | Peptide mass (m/z) | Charge State | Xcorr  | DelCn2 |
|-----------------------------------|--------------------|--------------|--------|--------|
| GLQEAAEER                         | 1003.0             | 2            | 2.6538 | 0.2072 |
| GLQEAAEERESAREEEEEAEQER           | 2576.6             | 3            | 4.6315 | 0.2839 |
| GLQEAAEERESAREEEEEAEQERR          | 2732.8             | 3            | 4.2542 | 0.2374 |
| GLQEAAEERESAREEEEEAEQERRGGEER     | 3261.3             | 3            | 4.8287 | 0.1952 |
| GLQHLYALVLVNNK                    | 1582.9             | 2            | 3.1342 | 0.2587 |
| GLQKEEVLLTHGDSVDKVDGFK            | 2585.9             | 3            | 3.9954 | 0.2102 |
| GLQQITGHGGLR                      | 1237.4             | 2            | 3.1956 | 0.3434 |
| GLQSIFQEQGMAESVHTWQDHGYLATYTNK    | 3441.7             | 3            | 4.0273 | 0.2284 |
| GLQTVHINENFAK                     | 1471.6             | 2            | 3.1794 | 0.373  |
| GLRKPEVGGVIR                      | 1281.5             | 3            | 3.6521 | 0.2031 |
| GLSAASPPLAETGAPR                  | 1495.7             | 2            | 3.4193 | 0.2442 |
| GLSAEPGWQAK                       | 1144.3             | 2            | 2.8293 | 0.1777 |
| GLSDIHR                           | 935.0              | 2            | 2.4353 | 0.1422 |
| GLSEDTTEETLKESFDGSVR              | 2201.3             | 2            | 4.8688 | 0.4784 |
| GLSGLELDGMAELMAGLMQGVHDHVAR       | 2729.2             | 3            | 4.1415 | 0.3732 |
| GLSGTAVLDLR                       | 1102.3             | 2            | 2.9031 | 0.2478 |
| GLSQSALPYR                        | 1092.2             | 2            | 2.5867 | 0.1934 |
| GLSSDNKPMVNLDK                    | 1518.7             | 2            | 3.9443 | 0.2496 |
| GLSSLLYGSIPK                      | 1235.5             | 2            | 3.8146 | 0.3168 |
| GLSVREILAEITGR                    | 1514.8             | 2            | 3.1945 | 0.2368 |
| GLSYETAENPRPVGQLADRPEVK           | 2527.8             | 3            | 4.4791 | 0.3989 |
| GLTAVSNNAGVDNFGGLLLR              | 2102.4             | 2            | 5.4841 | 0.5199 |
| GLTEFVEPIIQIK                     | 1487.8             | 2            | 3.7826 | 0.2015 |
| GLTEGLHGFHVHEFGDNTAGCTSAGPHFNPL   | 3221.5             | 3            | 4.9269 | 0.3437 |
| GLTEGLHGFHVHEFGDNTAGCTSAGPHFNPLSR | 3464.7             | 3            | 8.348  | 0.5331 |
| GLTGSPGSPGPDGK                    | 1227.3             | 2            | 2.5157 | 0.1194 |
| GLTLIELWEGLTVDDVQK                | 2030.3             | 2            | 3.6678 | 0.2973 |
| GLTMLDHEQVTPEDPGAQFLIR            | 2468.8             | 3            | 5.4032 | 0.4388 |
| GLTPSQIGVILR                      | 1254.5             | 2            | 3.0844 | 0.3161 |
| GLTQADPSLDPTSTPVDNLAAEILPAELRETLR | 3619.0             | 3            | 5.1117 | 0.3878 |
| GLTQKDLATK                        | 1075.2             | 2            | 3.0796 | 0.2481 |
| GLTSVINQK                         | 960.1              | 2            | 3.0321 | 0.2532 |
| GLVAVITGGASGLGLATAER              | 1814.1             | 2            | 6.1797 | 0.5838 |
| GLVDGGEAVEAR                      | 1173.3             | 2            | 3.9109 | 0.3376 |
| GLVDKFNQGMVDTAKK                  | 1752.0             | 2            | 3.7468 | 0.3209 |
| GLVDKFPLFMAVYK                    | 1629.0             | 2            | 4.211  | 0.4476 |



| Peptide Sequence                          | Peptide mass (m/z) | Charge State | Xcorr  | DelCn2 |
|-------------------------------------------|--------------------|--------------|--------|--------|
| GLVEKLTAYAMTIPFVR                         | 1910.3             | 2            | 2.8194 | 0.3294 |
| GLVEPVDVVDNADGTQTVNYVPSR                  | 2545.7             | 3            | 5.9826 | 0.5281 |
| GLVEPVNVVDNGDGTHTVYTPSQEGPYMVSVK          | 3491.8             | 3            | 6.3443 | 0.4872 |
| GLVGEIIKR                                 | 985.2              | 2            | 2.7314 | 0.1534 |
| GLVGPELHDR                                | 1093.2             | 2            | 2.6572 | 0.2217 |
| GLVLDHGAR                                 | 938.1              | 2            | 2.4538 | 0.1492 |
| GLVLGPIHK                                 | 934.2              | 2            | 2.9693 | 0.1798 |
| GLVLGPIHKNQKDDVAQTDLLQIDPNFGSKEDFDSLLQSAK | 4497.0             | 3            | 4.2787 | 0.3262 |
| GLVMVKPGSIKPHQK                           | 1620.0             | 2            | 3.6782 | 0.3245 |
| GLVNLQSGAPKPEENPSLNIQFK                   | 2481.8             | 3            | 4.6879 | 0.4057 |
| GLVQALGLSNFNSR                            | 1476.7             | 2            | 4.8546 | 0.4076 |
| GLVREDAVLYLLEIPKGEMVTILAQSR               | 3015.6             | 3            | 5.0517 | 0.3481 |
| GLVSSDELAKDVTGAEALLER                     | 2174.4             | 2            | 5.0105 | 0.4362 |
| GLVSTLQSATEQMAATVAGSVR                    | 2178.5             | 2            | 5.2644 | 0.4975 |
| GLVVDMDFEER                               | 1496.6             | 2            | 4.1552 | 0.2525 |
| GLVVDMDFEERK                              | 1624.8             | 2            | 4.0542 | 0.4142 |
| GLVVTDLKAESVLEHR                          | 1866.2             | 2            | 4.4211 | 0.4665 |
| GLVYETSVLDPDEGIR                          | 1763.9             | 2            | 4.5282 | 0.4723 |
| GLYDGPVCEVSVTPK                           | 1564.8             | 2            | 3.9035 | 0.4258 |
| GLYGIKDDVFLSVPCILGQNGISDLVK               | 2865.3             | 3            | 4.1513 | 0.2782 |
| GLYPAPLKIIDVVK                            | 1526.9             | 2            | 2.7632 | 0.3104 |
| GLYQLTINSVTTDDDAEYTVVAR                   | 2545.7             | 3            | 3.2401 | 0.1355 |
| GMAFLHTLEPLIPR                            | 1595.9             | 2            | 3.7813 | 0.3569 |
| GMAFTLQER                                 | 1053.2             | 2            | 2.813  | 0.1365 |
| GMDKILLSSGR                               | 1177.4             | 2            | 3.1965 | 0.2816 |
| GMDKILLSSGRDASLMVTNDGATILK                | 2708.1             | 3            | 3.6631 | 0.2136 |
| GMDKLIVDGR                                | 1104.3             | 2            | 2.5362 | 0.1125 |
| GMEDLIPLVNR                               | 1257.5             | 2            | 3.0335 | 0.2074 |
| GMELSVLDSLNR                              | 1405.6             | 2            | 3.9846 | 0.2203 |
| GMENSISDASR                               | 1167.2             | 2            | 3.4501 | 0.3162 |
| GMFTAEDLR                                 | 1040.2             | 2            | 2.4202 | 0.1995 |
| GMGEAVQEFVDKEEKDAIEELVK                   | 2594.9             | 3            | 5.3106 | 0.3249 |
| GMGEAVQEFVDKEEKDAIEELVKYQLEK              | 3256.6             | 3            | 4.2067 | 0.1296 |
| GMGGAFVLVLYDEIKK                          | 1741.1             | 2            | 4.3608 | 0.4001 |
| GMGGAFVLVLYDEIKKYT                        | 2005.4             | 2            | 4.4059 | 0.4387 |
| GMGGAFVLVLYDELKK                          | 1741.1             | 2            | 4.0383 | 0.3832 |

| Peptide Sequence                      | Peptide mass (m/z) | Charge State | Xcorr  | DelCn2 |
|---------------------------------------|--------------------|--------------|--------|--------|
| GMGGAMDLVSSAK                         | 1224.4             | 2            | 2.4708 | 0.141  |
| GMGGHGYGGAGDASSGFHGGHFVHMR            | 2544.7             | 3            | 5.2357 | 0.4572 |
| GMGGLFSVGETTAK                        | 1355.5             | 2            | 3.8271 | 0.3955 |
| GMGTVTFEQAIEAVQAISMFNGQFLFDRPMHVK     | 3702.3             | 3            | 3.5704 | 0.1675 |
| GMLHQDHITFAMLLAR                      | 1855.2             | 3            | 4.8796 | 0.3816 |
| GMLKDNAMLEYLK                         | 1526.8             | 2            | 4.0406 | 0.3949 |
| GMLREDAVLEYLK                         | 1537.8             | 3            | 3.3243 | 0.1047 |
| GMLSAITNVVQNTGK                       | 1533.8             | 2            | 4.253  | 0.443  |
| GMNFSVVVFDAPTGHRTL                    | 2050.3             | 2            | 2.5393 | 0.2843 |
| GMNMYLTK                              | 958.2              | 2            | 2.6036 | 0.1676 |
| GMQLMHANAQR                           | 1257.5             | 2            | 4.0675 | 0.3461 |
| GMSEEEVFTEVANLFR                      | 1859.0             | 2            | 3.2902 | 0.2816 |
| GMSLNLEPDNVGVVVFVFGNDK                | 2105.4             | 2            | 5.7305 | 0.5249 |
| GMSLNLEPDNVGVVVFVFGNDKLIK             | 2459.8             | 2            | 4.5942 | 0.391  |
| GMSLNLEPDNVGVVVFVFGNDKLIKEGDIVKR      | 3257.8             | 3            | 4.4    | 0.3494 |
| GMSVSDLADKLSTDDLNSLIAHAHR             | 2667.9             | 3            | 6.8015 | 0.5388 |
| GMSVSDLADKLSTDDLNSLIAHAHRR            | 2824.1             | 3            | 4.9154 | 0.3609 |
| GMSVYGLGR                             | 940.1              | 2            | 2.8199 | 0.212  |
| GMTLVTPQLQLLFASK                      | 1733.2             | 2            | 4.1394 | 0.4085 |
| GMTPGAEIHFLENAK                       | 1745.0             | 2            | 3.8425 | 0.2149 |
| GMTTVDDFFQGTK                         | 1447.6             | 2            | 3.2955 | 0.3442 |
| GMTVEGLKQFIAAQGSSR                    | 1881.1             | 3            | 3.9553 | 0.1972 |
| GMTYDALHVFDWIK                        | 1697.0             | 2            | 2.8087 | 0.2428 |
| GMVKEAIDSYIK                          | 1354.6             | 2            | 3.2155 | 0.2498 |
| GMVKEAIDSYIKADDPSSYMEVVQAANTSGNWEELVK | 4077.5             | 3            | 4.957  | 0.2989 |
| GMVDGPVFDLTTTPK                       | 1642.9             | 2            | 4.6349 | 0.5005 |
| GMVDGPVYEVPAATPK                      | 1624.8             | 2            | 4.7249 | 0.4502 |
| GNAGGIQPDLLISLTAPK                    | 1766.0             | 2            | 3.3023 | 0.2942 |
| GNAHLGYSLVTHIPAGAR                    | 1835.1             | 3            | 4.1099 | 0.3962 |
| GNAMVEEGHFAAEDVK                      | 1704.8             | 2            | 5.1258 | 0.4063 |
| GNDISSGTVLSDYVVGSGPPK                 | 1951.1             | 2            | 6.4476 | 0.5505 |
| GNDISSGTVLSDYVVGSGPPKGTGLHR           | 2572.8             | 3            | 5.7776 | 0.4854 |
| GNDVAFHFNPR                           | 1274.4             | 2            | 3.2054 | 0.3377 |
| GNEEAQIFRPLK                          | 1402.6             | 2            | 2.7843 | 0.184  |
| GNEEAQIFRPLKFNTTSVIK                  | 2293.6             | 3            | 3.4908 | 0.2818 |
| GNEFLFSHLWPLIEK                       | 1831.1             | 2            | 3.6189 | 0.2996 |

| Peptide Sequence                 | Peptide mass (m/z) | Charge State | Xcorr  | DelCn2 |
|----------------------------------|--------------------|--------------|--------|--------|
| GNEIVLSAGSTPR                    | 1301.4             | 2            | 3.463  | 0.3187 |
| GNEMSEVLRDFPELTMEVDGKVESIMKR     | 3241.7             | 3            | 3.3703 | 0.1394 |
| GNEQESMAR                        | 1022.1             | 2            | 2.8709 | 0.2657 |
| GNEQESMARLKKLMTIMDSMNDQELDSTDGAK | 3589.0             | 3            | 3.236  | 0.1188 |
| GNFGGSFAGSFGGAGGHAPGVAR          | 2036.2             | 2            | 6.1569 | 0.5965 |
| GNFNIEFTR                        | 1261.4             | 2            | 3.5874 | 0.4389 |
| GNFNIVEFTR                       | 1247.3             | 2            | 3.2848 | 0.2493 |
| GNFSSFMQKEIFEQPESVVNTMR          | 2707.0             | 3            | 5.0925 | 0.3278 |
| GNFYIFDVLDDQGNIVSPSEIQAHLK       | 2921.2             | 3            | 5.9889 | 0.4445 |
| GNGPLPLGGSGLMEEMSALLAR           | 2171.5             | 2            | 3.3577 | 0.3782 |
| GNHAAFQADVSEAR                   | 1473.5             | 2            | 3.7447 | 0.3178 |
| GNHDGAVQQYIR                     | 1358.4             | 2            | 2.7866 | 0.2116 |
| GNHVIRDEEVSSADISSSEVISQHLVSYR    | 3302.5             | 3            | 5.9965 | 0.401  |
| GNILIPGINEAVAAVTEEEHK            | 2205.5             | 2            | 2.432  | 0.1923 |
| GNIMLSQK                         | 891.1              | 2            | 2.409  | 0.1061 |
| GNKEDYDLSK                       | 1169.2             | 2            | 2.9151 | 0.3058 |
| GNKEPNPMVQLSIQDVTQESK            | 2343.6             | 3            | 4.4222 | 0.2749 |
| GNLANVIR                         | 857.0              | 2            | 2.848  | 0.234  |
| GNLEVLLFTIQSK                    | 1462.7             | 2            | 3.3943 | 0.2867 |
| GNLEVVHHR                        | 1061.2             | 2            | 2.727  | 0.1504 |
| GNLGAGNGNLQGPR                   | 1325.4             | 2            | 3.1087 | 0.4086 |
| GNLGVYQETR                       | 1137.2             | 2            | 3.229  | 0.3669 |
| GNLLHFPSSQGEEEEKEKLEGDHTIR       | 2852.1             | 3            | 3.6975 | 0.1198 |
| GNNFLYTNGK                       | 1128.2             | 2            | 3.7354 | 0.3923 |
| GNNIRYFILPDSLPLDTLLVDVEPK        | 2843.3             | 3            | 5.1809 | 0.3661 |
| GNNLSTISDTSPMKRSASVLGPKARR       | 2745.1             | 3            | 3.5159 | 0.1942 |
| GNPTVEVDLFTSK                    | 1407.6             | 2            | 3.9772 | 0.3004 |
| GNPTVEVDLYTAK                    | 1407.6             | 2            | 4.0877 | 0.2119 |
| GNQDKDAHFPSPSK                   | 1538.6             | 2            | 4.2122 | 0.3863 |
| GNQLQEFAAMLMPHQK                 | 1844.2             | 2            | 4.1938 | 0.342  |
| GNRPVILTYHDIGLNHK                | 1948.2             | 3            | 3.7379 | 0.2678 |
| GNRPVILTYHDIGMNHK                | 1966.3             | 3            | 4.1586 | 0.3913 |
| GNSGQSVYSASK                     | 1185.2             | 2            | 2.8926 | 0.1264 |
| GNSIIMLEALER                     | 1346.6             | 2            | 3.623  | 0.3672 |
| GNSIIMLEALERV                    | 1445.7             | 2            | 3.6193 | 0.261  |
| GNSLQEILER                       | 1159.3             | 2            | 3.3432 | 0.2351 |

| Peptide Sequence              | Peptide mass (m/z) | Charge State | Xcorr  | DelCn2 |
|-------------------------------|--------------------|--------------|--------|--------|
| GNSSSEIEAIREYEEFFQNSK         | 2594.7             | 3            | 4.1291 | 0.3067 |
| GNSTVYEWK                     | 1112.2             | 2            | 2.9429 | 0.3401 |
| GNTAAYLLYAFTR                 | 1461.6             | 2            | 2.9854 | 0.3511 |
| GNTESKTDGDDTETVPSEQSHASGK     | 2578.6             | 3            | 4.7099 | 0.348  |
| GNTPATGTTQGK                  | 1133.2             | 2            | 2.9891 | 0.453  |
| GNTSGSHIVNHLVR                | 1491.6             | 2            | 4.4116 | 0.4731 |
| GNVFSSPTAAGTPNKETAGLK         | 2048.2             | 2            | 4.3656 | 0.472  |
| GNVGFVFTK                     | 969.1              | 2            | 2.9922 | 0.3733 |
| GNVGFVFTKEDLTEIR              | 1826.0             | 3            | 4.7076 | 0.4633 |
| GNVGFVFTKEDLTEIRDMLLANK       | 2612.0             | 3            | 3.8178 | 0.3509 |
| GNVGFVFTKEDLTEIRDMLLANKVPAAAR | 3177.7             | 3            | 6.5344 | 0.4688 |
| GNVYIHPTAK                    | 1100.3             | 2            | 3.1551 | 0.3403 |
| GNWDEQFDKENTEER               | 1897.9             | 2            | 4.5616 | 0.4354 |
| GNWGHLDQVAALR                 | 1437.6             | 2            | 3.2967 | 0.3697 |
| GPAAAQGSAAAPAEPK              | 1394.5             | 2            | 4.6541 | 0.3097 |
| GPADSLSTAAGAAELSAEGAGK        | 1932.0             | 2            | 3.6512 | 0.313  |
| GPAGPQGPR                     | 836.9              | 2            | 2.4817 | 0.1855 |
| GPAGPSGPAGK                   | 896.0              | 2            | 3.1342 | 0.2408 |
| GPAHPGSPIDVR                  | 1203.3             | 2            | 4.0193 | 0.3604 |
| GPALTPIRDEEWGGHSPR            | 1976.1             | 3            | 3.4557 | 0.243  |
| GPAPVLEVDYYGAYGSR             | 1879.0             | 2            | 3.9675 | 0.4368 |
| GPAYGLSR                      | 820.9              | 2            | 2.7507 | 0.3338 |
| GPDALTLLEYTETR                | 1579.7             | 2            | 4.5337 | 0.4152 |
| GPDFTPAFADFGR                 | 1398.5             | 2            | 2.7241 | 0.1728 |
| GPDGLTAFEATDNQAIK             | 1748.9             | 2            | 5.731  | 0.5437 |
| GPDNSMGFGAER                  | 1238.3             | 2            | 3.2032 | 0.3914 |
| GPDWILGEIK                    | 1128.3             | 2            | 3.0072 | 0.1044 |
| GPEAGYVATPIAMVQAAMTLLSDASHLPK | 2941.4             | 3            | 3.8017 | 0.3828 |
| GPEEKKDCEVMMIGLPGAGK          | 2189.6             | 3            | 3.7429 | 0.2187 |
| GPEGHPLHEVLLEQAK              | 1755.0             | 3            | 3.4942 | 0.2759 |
| GPESESEDHR                    | 1143.1             | 2            | 2.799  | 0.2855 |
| GPFLLGK                       | 845.1              | 2            | 3.0224 | 0.1885 |
| GPFLVALGK                     | 902.1              | 2            | 3.2866 | 0.3034 |
| GPFPVWNPITYLDHNNFWR           | 2471.8             | 2            | 3.3597 | 0.2826 |
| GPFTDVVTTNLK                  | 1292.5             | 2            | 3.921  | 0.346  |
| GPGASGEQPEPGEAAAGGAAEEAR      | 2167.2             | 3            | 6.1596 | 0.5391 |

| Peptide Sequence                  | Peptide mass (m/z) | Charge State | Xcorr  | DelCn2 |
|-----------------------------------|--------------------|--------------|--------|--------|
| GPGASVHDR                         | 895.9              | 2            | 2.914  | 0.2484 |
| GPGGSSLLIEALSNSSHK                | 1754.9             | 2            | 3.0682 | 0.3015 |
| GPGLGSTQGQTIALPAQGLIEFR           | 2312.6             | 2            | 6.2938 | 0.5783 |
| GPGPLGPGAPPPLLLFLNK               | 1743.1             | 2            | 3.3188 | 0.2974 |
| GPGQVPTATSALSLELQEVEPLGLPQASPSR   | 3131.5             | 3            | 4.8912 | 0.376  |
| GPGTSFEFALAIVEALNGK               | 1922.2             | 2            | 6.524  | 0.5576 |
| GPGTSFEFALAIVEALNGKEVAAQVK        | 2648.0             | 3            | 6.3423 | 0.5365 |
| GPGTSFEFALAIVEALNGKEVAAQVKAPLVLKD | 3384.9             | 3            | 5.0436 | 0.3562 |
| GPHFNPSAIHNFYDNIGFVGPVPPKPK       | 2948.3             | 3            | 4.0766 | 0.2902 |
| GPHHLDNSSPGPGSEAR                 | 1715.8             | 2            | 4.1244 | 0.3338 |
| GPHLVQSDGTVPFWAHAGNAIPSSDQIR      | 2959.2             | 3            | 5.3815 | 0.4566 |
| GPIKFNVWDTAGQEK                   | 1690.9             | 3            | 3.9934 | 0.2828 |
| GPKPAFGQQHQQQPK                   | 1676.9             | 2            | 3.6948 | 0.3192 |
| GPLEHLYSLHIPNCDKHGLYNLK           | 2663.1             | 3            | 3.2382 | 0.2251 |
| GPLEYVPSAK                        | 1061.2             | 2            | 2.8888 | 0.3037 |
| GPLEYVPSAKVEVVEER                 | 1902.1             | 2            | 5.2515 | 0.3633 |
| GPLGLTDLELAQQLQEEYQQQAAQPVR       | 3281.6             | 3            | 5.4277 | 0.4466 |
| GPLKTPIAAGHPSMNLRLR               | 1987.4             | 3            | 4.6491 | 0.4985 |
| GPLLVQDVVFTDEMAHFDR               | 2190.5             | 3            | 3.3766 | 0.3187 |
| GPLMMYISK                         | 1040.3             | 2            | 3.189  | 0.3902 |
| GPLPAAPPVAPER                     | 1272.5             | 2            | 3.3623 | 0.3571 |
| GPLPLSSQHR                        | 1092.2             | 2            | 3.0769 | 0.3789 |
| GPLPLSSQHRGDADQASNILASFGLSAR      | 2867.1             | 3            | 6.0708 | 0.5468 |
| GPLQSVQVFGR                       | 1188.4             | 2            | 2.9452 | 0.3046 |
| GPLQTASVSPSPMPFSASLLGTLPGAR       | 2657.1             | 2            | 3.0345 | 0.2659 |
| GPMDSDDSHGSVLR                    | 1473.6             | 2            | 4.1173 | 0.3906 |
| GPNGESSVIHDR                      | 1268.3             | 2            | 2.8955 | 0.3006 |
| GPNGYGFHLHGEK                     | 1413.5             | 2            | 3.754  | 0.3881 |
| GPNKHTLTQIK                       | 1237.4             | 2            | 2.6979 | 0.1652 |
| GPPASSPAPAPK                      | 1077.2             | 2            | 2.7427 | 0.3427 |
| GPPLREGEELVMDEEAYVLYHR            | 2603.9             | 3            | 3.4322 | 0.1359 |
| GPPPAPRPTSR                       | 1133.3             | 2            | 2.4906 | 0.1834 |
| GPPQEEEEEEDEEEEEATKEDAEAPGIR      | 3044.0             | 3            | 5.541  | 0.4092 |
| GPPQEEEEEEDEEEEEATKEDAEAPGIRDHES  | 3512.4             | 3            | 5.898  | 0.362  |
| GPPQQHGHHNEFDDEFEDDDPLPAIGHCK     | 3283.4             | 3            | 5.0443 | 0.3727 |
| GPPRPRPAPAVGEAEDKENQQATSGPNQPSVR  | 3339.6             | 3            | 5.8945 | 0.3226 |

| Peptide Sequence              | Peptide mass (m/z) | Charge State | Xcorr  | DelCn2 |
|-------------------------------|--------------------|--------------|--------|--------|
| GPQAQIASSGLTVEVDAPK           | 1869.1             | 2            | 2.4763 | 0.1125 |
| GPQEVAVYVQELQK                | 1588.8             | 2            | 3.0992 | 0.1483 |
| GPQGVEDGDRPQPSSK              | 1654.7             | 2            | 4.1735 | 0.4188 |
| GPQLAAQNGLISLANLLLSK          | 2022.4             | 2            | 5.0938 | 0.542  |
| GPQVQQPPPSNR                  | 1305.4             | 2            | 2.5163 | 0.229  |
| GPRASVTNDSGPRLVSIAGTRPSVR     | 2551.8             | 2            | 2.4724 | 0.1875 |
| GPSAAGEQEPDKESGASVDEVAR       | 2287.3             | 2            | 2.6967 | 0.1791 |
| GPSFDVQVGLHELLGHGSGK          | 2035.2             | 3            | 3.8405 | 0.3322 |
| GPSGLGFNIVGGTDQQYVSNDSGIYVSR  | 2889.1             | 3            | 5.6675 | 0.4608 |
| GPSGLLTYTGK                   | 1094.2             | 2            | 3.1738 | 0.2262 |
| GPSGLLVYQGK                   | 1119.3             | 2            | 4.1003 | 0.2973 |
| GPSGYGFNLHSDK                 | 1379.5             | 2            | 3.3912 | 0.3123 |
| GPSHPLDLGTSSPNTSQIHWTPYR      | 2649.9             | 3            | 4.6829 | 0.4274 |
| GPSLNPVLDYDHGSR               | 1627.7             | 2            | 3.6892 | 0.4538 |
| GPSSEAMHVGHLIPFIFTK           | 2069.4             | 2            | 2.793  | 0.3104 |
| GPSSHEMR                      | 901.0              | 2            | 2.5144 | 0.3023 |
| GPSSVEDIK                     | 932.0              | 2            | 3.0232 | 0.2465 |
| GPSSVEDIKAK                   | 1131.3             | 2            | 3.7062 | 0.334  |
| GPSWDPFR                      | 962.0              | 2            | 2.6683 | 0.1861 |
| GPSWDPFRDWYPHSR               | 1904.0             | 3            | 4.4133 | 0.3393 |
| GPTEADELMKR                   | 1247.4             | 2            | 2.6922 | 0.2588 |
| GPTLLKHPPAPAEPSSDLASK         | 2114.4             | 3            | 5.0405 | 0.4327 |
| GPTPGQAPAGGAGAEGK             | 1423.5             | 2            | 3.2686 | 0.3021 |
| GPVDHGVQIR                    | 1078.2             | 2            | 3.0726 | 0.3223 |
| GPVEGYEENEFLR                 | 1668.7             | 2            | 4.0481 | 0.5025 |
| GPVGLEGLLTTK                  | 1185.4             | 2            | 3.2146 | 0.3414 |
| GPVGTVSEAQLAR                 | 1285.4             | 2            | 2.8269 | 0.2881 |
| GPVKPTGGPGGGGTQTQQQMNQLK      | 2367.6             | 3            | 4.8428 | 0.3147 |
| GPVRAPAEKPR                   | 1178.4             | 2            | 2.8482 | 0.2241 |
| GPVREGDVLTLLESER              | 1771.0             | 3            | 5.0422 | 0.3581 |
| GPVREGDVLTLLESEREAR           | 2127.3             | 3            | 4.9224 | 0.3326 |
| GPVSGTEPEPVYSMEAADYR          | 2156.3             | 2            | 4.5804 | 0.4913 |
| GPVYIGELPQDFLR                | 1604.8             | 2            | 4.5216 | 0.4077 |
| GQAAQPEPSTGFTATPPAPDSPQEPLVLR | 2961.2             | 3            | 4.2651 | 0.4126 |
| GQAAVQQLQAEGLSPR              | 1653.8             | 2            | 5.1627 | 0.4063 |
| GQAGGKLHIIIVGTPPTGNQPFPK      | 2444.8             | 3            | 4.3693 | 0.1635 |

| Peptide Sequence                 | Peptide mass (m/z) | Charge State | Xcorr  | DelCn2 |
|----------------------------------|--------------------|--------------|--------|--------|
| GQAVDYEGSR                       | 1082.1             | 2            | 2.6087 | 0.1813 |
| GQAVDYEGSRTQEEIVAK               | 1981.1             | 2            | 4.8627 | 0.3072 |
| GQDEASAGGIWGFVK                  | 1536.7             | 2            | 3.7675 | 0.4117 |
| GQDIRIPTVIHTK                    | 1575.8             | 3            | 3.3269 | 0.2716 |
| GQDIRIPTVIHTKH                   | 1713.0             | 3            | 4.5827 | 0.4602 |
| GQDMETEAHQNKLEEMINELAVAMTAVK     | 3132.5             | 3            | 5.1338 | 0.3972 |
| GQEEAGAGGR                       | 931.9              | 2            | 2.4505 | 0.1943 |
| GQESAGIVTSDGSSVPTFK              | 1868.0             | 2            | 3.6572 | 0.3975 |
| GQESFKKQEK                       | 1209.3             | 2            | 3.3666 | 0.1952 |
| GQETSTNPIASIFAWTR                | 1880.1             | 2            | 5.1437 | 0.4772 |
| GQFETYLRDCPDPCIGW                | 2001.2             | 3            | 3.2356 | 0.2221 |
| GQFSTDELVAEVEKR                  | 1708.9             | 2            | 4.4068 | 0.5102 |
| GQGPGEVDPK                       | 984.0              | 2            | 2.4914 | 0.122  |
| GQGSSPVAMQK                      | 1090.2             | 2            | 2.8866 | 0.2018 |
| GQGVYLGMPGCLPVYDALAGEFIR         | 2527.9             | 3            | 3.8571 | 0.2637 |
| GQHEPSKPPPAGETVTGGFGAK           | 2150.3             | 3            | 3.5921 | 0.224  |
| GQHLGELGFEEFFETSAK               | 2026.2             | 2            | 6.0687 | 0.5038 |
| GQHLSDAFAQVNPLK                  | 1625.8             | 2            | 4.9902 | 0.5084 |
| GQHVPGPSFPQFTVGPLGEGGAHK         | 2305.5             | 3            | 3.2405 | 0.2408 |
| GQHVTGPSFPQFTVGPLGEGGAHK         | 2309.5             | 3            | 5.6355 | 0.4888 |
| GQKAPAQKAPAPK                    | 1292.5             | 2            | 3.3919 | 0.2596 |
| GQKIPIFSAAGLPHNEIAAQICR          | 2435.8             | 3            | 5.0988 | 0.4264 |
| GQKLGDLER                        | 1145.2             | 2            | 2.9928 | 0.1839 |
| GQKVLDSGAPIKIPVGPETLGR           | 2233.6             | 3            | 4.9472 | 0.4054 |
| GQLEALQVDGGR                     | 1243.4             | 2            | 4.1982 | 0.3515 |
| GQLEANLLQVLEKVEEFR               | 2116.4             | 2            | 3.4938 | 0.3523 |
| GQLEQITGK                        | 974.1              | 2            | 2.9815 | 0.1663 |
| GQLGNWMSPADFQR                   | 1607.8             | 2            | 4.1975 | 0.4565 |
| GQLKQWLDLHLHQEIPTSLLILSR         | 2840.3             | 3            | 3.3827 | 0.2324 |
| GQLLAEQLGFDFFEASAK               | 1972.2             | 2            | 6.5321 | 0.4845 |
| GQLPDYTSPPVLPYSR                 | 1793.0             | 2            | 3.5378 | 0.3314 |
| GQLTTDQVFPYPSVLNEEQTQFLK         | 2784.1             | 3            | 5.9681 | 0.483  |
| GQLTTDQVFPYPSVLNEEQTQFLKELVEPVSR | 3694.1             | 3            | 5.3419 | 0.4094 |
| GQLVPLETVLDMLR                   | 1584.9             | 2            | 4.4077 | 0.4712 |
| GQLVPLETVLDMLRDAMVAK             | 2200.7             | 2            | 3.0299 | 0.2831 |
| GQMOKPFEDASFALR                  | 1726.0             | 2            | 4.0222 | 0.4042 |

| Peptide Sequence                      | Peptide mass (m/z) | Charge State | Xcorr  | DelCn2 |
|---------------------------------------|--------------------|--------------|--------|--------|
| GQNDLMGTAEDFADQFLR                    | 2029.2             | 2            | 5.7264 | 0.5876 |
| GQNLLLNLQTIQGILER                     | 2025.3             | 2            | 5.6632 | 0.5045 |
| GQNSLALHK                             | 968.1              | 2            | 2.8668 | 0.2043 |
| GQPDEELKPK                            | 1141.3             | 2            | 2.8884 | 0.1987 |
| GQPDLPEGSLPIATVEELTDTFYR              | 2813.1             | 3            | 3.338  | 0.1928 |
| GQPDVVVKEDEEYK                        | 1635.8             | 2            | 3.5544 | 0.2397 |
| GQPDVVVKEDEEYKR                       | 1791.9             | 2            | 4.8587 | 0.4219 |
| GQPDVVVKEDEEYKRVDFSKVPK               | 2693.0             | 3            | 4.5321 | 0.3495 |
| GQPFWLTLLHFEGR                        | 1588.8             | 2            | 3.8844 | 0.336  |
| GQPIYIQFSNHK                          | 1432.6             | 2            | 3.5881 | 0.326  |
| GQPIYIQFSNHKELK                       | 1803.1             | 2            | 3.8928 | 0.1994 |
| GQPLGPAGVQVSLR                        | 1379.6             | 2            | 3.5294 | 0.3618 |
| GQPLQAAVEKDSL                         | 1512.7             | 2            | 3.0858 | 0.2163 |
| GQQLVMMPNKHNVVLGILSDDVETDTVAPGENLK    | 3793.3             | 3            | 6.0149 | 0.4129 |
| GQQVFLKDIWPTRDEIQAVR                  | 2529.8             | 3            | 3.6699 | 0.2735 |
| GQREEVEQMK                            | 1234.4             | 2            | 2.5876 | 0.1481 |
| GQRGFSQEELETTCMINQAPGCPDYSILSFMGAFHGR | 3979.5             | 3            | 4.6841 | 0.3023 |
| GQRPETLHER                            | 1223.3             | 2            | 2.4127 | 0.173  |
| GQSEDPGSLLSLFR                        | 1506.6             | 2            | 4.4001 | 0.4576 |
| GQSEEIQK                              | 919.0              | 2            | 2.5126 | 0.1074 |
| GQSLAVKSFSR                           | 1180.3             | 2            | 2.43   | 0.1607 |
| GQTEGKIPPELLASGMVDNMTK                | 2220.6             | 3            | 4.7875 | 0.4117 |
| GQTEGKIPPELLASGMVDNMTKLVLVNAIYFK      | 3382.0             | 3            | 6.0254 | 0.4949 |
| GQHTLEDQFQR                           | 1332.4             | 3            | 3.8138 | 0.4349 |
| GQTLVVQFTVK                           | 1220.4             | 2            | 3.4759 | 0.3385 |
| GQTNVGGDGR                            | 1032.1             | 2            | 2.6355 | 0.204  |
| GQVAKLEAALGEAK                        | 1385.6             | 2            | 3.293  | 0.1605 |
| GQVFDVGP                              | 975.1              | 2            | 2.8025 | 0.2153 |
| GQVGGQVSVEVDSAPGTDLAK                 | 2015.2             | 2            | 5.6184 | 0.5068 |
| GQVLNSDELQELYEGLR                     | 1964.1             | 2            | 5.3783 | 0.528  |
| GQVLNSDELQELYEGLRLNMMNKYDYVLTGYTR     | 3911.3             | 3            | 4.4187 | 0.155  |
| GQVPENANVVITTLK                       | 1712.9             | 2            | 3.4244 | 0.2948 |
| GQVPPLVTTNFLVK                        | 1513.8             | 2            | 2.7758 | 0.4211 |
| GQVQEVGWHVAGWLGR                      | 1895.1             | 2            | 5.7468 | 0.5328 |
| GQVVGFIQEPVLFGTTIMENIR                | 2536.9             | 3            | 3.9022 | 0.2298 |
| GQVWINGFNLGR                          | 1361.5             | 2            | 2.5836 | 0.1092 |



| Peptide Sequence               | Peptide mass (m/z) | Charge State | Xcorr  | DelCn2 |
|--------------------------------|--------------------|--------------|--------|--------|
| GQYFGELALVTNKPR                | 1693.9             | 2            | 3.2325 | 0.34   |
| GQYISPFHDIPIYADKDVFMVVEVPR     | 3174.6             | 3            | 7.2813 | 0.5506 |
| GQYQGLSQDPNSLSNLDQDLPNMIHQVPIK | 3465.8             | 3            | 5.7983 | 0.4103 |
| GRAEGSEKEESR                   | 1335.4             | 2            | 3.1721 | 0.1874 |
| GRAEVLISVGPEDCVVPFLTRPK        | 2585.0             | 3            | 3.8069 | 0.3495 |
| GRAQADLALEK                    | 1172.3             | 2            | 3.0762 | 0.2221 |
| GRASSHSSQTQGGGSVTK             | 1732.8             | 2            | 5.0591 | 0.3254 |
| GRDEVSKNQALK                   | 1345.5             | 2            | 2.9157 | 0.1554 |
| GRDIVVLGVEK                    | 1185.4             | 2            | 3.0702 | 0.2944 |
| GRDKYEPAAVSEQGDKK              | 1879.0             | 2            | 4.7512 | 0.4111 |
| GRDPALPTLLNPK                  | 1392.6             | 2            | 2.8952 | 0.2143 |
| GRDWNVDLIPK                    | 1313.5             | 2            | 2.5278 | 0.1649 |
| GREEESDQIR                     | 1219.2             | 2            | 3.189  | 0.1494 |
| GREEYEGPNKKPR                  | 1560.7             | 2            | 4.2322 | 0.2989 |
| GREFGNLTR                      | 1050.2             | 2            | 3.1802 | 0.2066 |
| GREGPVQFEEDPFGLDKFLEEAK        | 2638.9             | 3            | 3.5839 | 0.1817 |
| GRELPTAFDYVEFTR                | 1802.0             | 2            | 5.0853 | 0.4506 |
| GREMFEVTGLHDVDQGWMR            | 2264.5             | 3            | 4.0173 | 0.2481 |
| GRENYSSYSSFSSPHMKPAPVGSR       | 2629.8             | 3            | 4.2111 | 0.2565 |
| GRFEELSAWTEK                   | 1453.6             | 2            | 3.0667 | 0.2297 |
| GRFQDNLDFIQWFK                 | 1815.0             | 2            | 3.4494 | 0.2954 |
| GRGDASGLKR                     | 1017.1             | 2            | 2.523  | 0.1762 |
| GRGELVTHFLTTDSDLSYLKK          | 2480.8             | 3            | 3.8509 | 0.3019 |
| GRGFGSEEGSR                    | 1139.2             | 2            | 2.6778 | 0.2777 |
| GRGLELYLNVHDEDRDDQTR           | 2565.7             | 3            | 3.934  | 0.2219 |
| GRHLVLLDTAQAAAAGHR             | 1858.1             | 3            | 5.1765 | 0.4378 |
| GRHVVLGAIENKVESK               | 1737.0             | 3            | 4.0682 | 0.2785 |
| GRKPGSVVAAAAAEAK               | 1483.7             | 2            | 4.3486 | 0.3739 |
| GRLDNGQVGLYPANYVEAIQ           | 2178.4             | 2            | 5.1334 | 0.4515 |
| GRLDYLSSLK                     | 1152.3             | 2            | 2.9987 | 0.296  |
| GRLGEEDAGAR                    | 1131.2             | 2            | 2.4939 | 0.1694 |
| GRLHPDLQSNLLQVDSEFTEEEIEFLEAR  | 3416.7             | 3            | 6.0805 | 0.3604 |
| GRLNVLANVIR                    | 1225.5             | 2            | 2.8849 | 0.2112 |
| GRLPLLLVANAGTAAVGHTDK          | 2075.4             | 3            | 4.9073 | 0.4402 |
| GRLPLLLVANAGTAAVGHTDKIGR       | 2401.8             | 3            | 4.3562 | 0.209  |
| GRLVQTQR                       | 958.1              | 2            | 2.468  | 0.132  |

| Peptide Sequence                    | Peptide mass (m/z) | Charge State | Xcorr  | DelCn2 |
|-------------------------------------|--------------------|--------------|--------|--------|
| GRLYPWGVVEVENPEHNDFLK               | 2499.8             | 3            | 6.0636 | 0.3154 |
| GRPAPGFHHGDGPGNAVQEIMIPASK          | 2641.9             | 3            | 4.931  | 0.3766 |
| GRPDSLLAYLEQAGASPHR                 | 2039.2             | 2            | 3.4981 | 0.2879 |
| GRPEPLDLHLMFLPTLLHQATAEQQER         | 3199.6             | 3            | 6.1973 | 0.4581 |
| GRPGAPGPAGAR                        | 1064.2             | 2            | 2.486  | 0.2295 |
| GRPGLPGAAGAR                        | 1080.2             | 2            | 2.8016 | 0.3661 |
| GRPGPIGVLLMK                        | 1238.6             | 2            | 2.7759 | 0.1982 |
| GRPGPVAGHHQMPR                      | 1497.7             | 3            | 3.9251 | 0.3765 |
| GRPLAESEQER                         | 1401.5             | 2            | 4.2797 | 0.4363 |
| GRPPKPLGGGTPK                       | 1262.5             | 2            | 2.8129 | 0.2731 |
| GRPTSTNPIASIFAWTR                   | 1876.1             | 3            | 4.6454 | 0.5184 |
| GRPVPMIPDELAPTYSLDTR                | 2360.7             | 3            | 4.1044 | 0.1483 |
| GRPYDYNGPR                          | 1195.3             | 2            | 2.6987 | 0.2795 |
| GRQLADHLGFEFFASAK                   | 2024.2             | 3            | 4.0261 | 0.3469 |
| GRQNISPDKIPWSALK                    | 1811.1             | 3            | 4.0165 | 0.2539 |
| GRQQNPVVNNHIGGK                     | 1618.8             | 2            | 3.582  | 0.2847 |
| GRRRAEDGSVIDYELIDQDAR               | 2279.4             | 3            | 3.8399 | 0.2223 |
| GRRRAEDGSVIDYELIDQDARDLYDAGVK       | 3141.4             | 3            | 4.8764 | 0.3385 |
| GRRDFPEEVAIVEELGR                   | 1973.2             | 3            | 5.2589 | 0.4474 |
| GRRDFPEEVAIVEELGRR                  | 2129.4             | 3            | 5.26   | 0.3329 |
| GRSEADSDKNATILELR                   | 1876.0             | 3            | 3.3821 | 0.1599 |
| GRSLHPVIYHLGQLALLGKSSHLTACGGRGKRSLD | 3700.3             | 3            | 3.8647 | 0.1204 |
| GRTAAEDNVR                          | 1089.1             | 2            | 2.5933 | 0.1821 |
| GRVEVLYR                            | 992.2              | 2            | 2.6473 | 0.2603 |
| GRVNFDDYTVNLGGLKDHK                 | 2262.5             | 3            | 4.925  | 0.3595 |
| GRVPEMADLHR                         | 1281.5             | 2            | 2.6752 | 0.2144 |
| GRVSIAELAQASNSLIAWGR                | 2100.4             | 2            | 2.703  | 0.3148 |
| GSAADSEESPAIEAIHLLR                 | 1967.1             | 2            | 4.5251 | 0.4812 |
| GSAADSEESPAIEAIHLLRK                | 2095.3             | 2            | 3.7501 | 0.4248 |
| GSAFSTSISKQETELSPEMISSGSWR          | 2804.0             | 3            | 4.4652 | 0.2525 |
| GSAITGPVAK                          | 901.0              | 2            | 3.0653 | 0.1432 |
| GSAKELLQHPFLK                       | 1468.7             | 2            | 3.9207 | 0.164  |
| GSAKELLQHQLK                        | 1499.7             | 3            | 3.2755 | 0.2048 |
| GSAPPGPVPEGSIR                      | 1321.5             | 2            | 2.5496 | 0.3467 |
| GSASMVQK                            | 807.9              | 2            | 2.8093 | 0.138  |
| GSATKDFSVFFQK                       | 1462.6             | 2            | 3.6118 | 0.3206 |

| Peptide Sequence                    | Peptide mass (m/z) | Charge State | Xcorr  | DelCn2 |
|-------------------------------------|--------------------|--------------|--------|--------|
| GSCSTEVEKETQEK                      | 1555.6             | 2            | 3.8925 | 0.3595 |
| GSDALSETSSVSHIEDLEKVER              | 2389.5             | 3            | 4.2963 | 0.2707 |
| GSDEPPVFLEIHVK                      | 1631.8             | 2            | 3.7994 | 0.4221 |
| GSDEPPVFLEIHVKGSPNANEPPLVFGK        | 3139.5             | 3            | 4.5609 | 0.2843 |
| GSDHSASLEPGELAEVLR                  | 1868.0             | 3            | 5.4076 | 0.4884 |
| GSDSPAADVEIEYVTEEPEIYEPNFIFFK       | 3337.6             | 3            | 3.9384 | 0.2335 |
| GSDSPAADVEIEYVTEEPEIYEPNFIFFKR      | 3493.8             | 3            | 4.5069 | 0.4461 |
| GSDVIIMLVGNKTDLADKR                 | 2046.4             | 3            | 4.1254 | 0.3334 |
| GSDWLGQDQDAIHYMTEQAPAAVVELENYGMPFSR | 3800.1             | 3            | 4.7006 | 0.3975 |
| GSEGKPSLTLPASAPGPEEALTTVTVAPAPR     | 3003.4             | 3            | 3.6858 | 0.1362 |
| GSEGLYMVNGPPHFTTESTVFPR             | 2423.7             | 3            | 3.4059 | 0.1185 |
| GSEIEDLVLLDEESRPVNLPPALKHPQELL      | 3352.8             | 3            | 3.4622 | 0.1033 |
| GSEIPKHMLADVFSVK                    | 1759.1             | 3            | 3.4075 | 0.3571 |
| GSEKSDDNSYDEK                       | 1474.4             | 2            | 3.6926 | 0.3548 |
| GSELEITLTR                          | 1119.3             | 2            | 3.0876 | 0.1743 |
| GSELSERIESFVETLKR                   | 1981.2             | 3            | 3.9232 | 0.2834 |
| GSELWLGVDALGLNIYEQNDR               | 2363.6             | 2            | 2.6044 | 0.2455 |
| GSEQESVKEFLAK                       | 1452.6             | 2            | 3.3666 | 0.1914 |
| GSETDSAQDQPVKMNSLPAER               | 2261.4             | 3            | 3.3875 | 0.2955 |
| GSFGAMDDPFKNK                       | 1414.6             | 2            | 2.8775 | 0.1881 |
| GSFLDKISPSVLR                       | 1419.7             | 2            | 2.7254 | 0.1132 |
| GSFMGSDEVFTYFYK                     | 1779.0             | 2            | 3.1715 | 0.2724 |
| GSFRYAWVLDK                         | 1342.5             | 3            | 4.5491 | 0.2997 |
| GSFSDEMNTILDNLAAR                   | 1855.0             | 2            | 4.8718 | 0.3869 |
| GSFSDTGLGDGK                        | 1141.2             | 2            | 3.3318 | 0.3794 |
| GSFSEQGINEFLR                       | 1484.6             | 2            | 4.4033 | 0.4036 |
| GSFSEQGINEFLRELSFGR                 | 2174.4             | 3            | 3.2619 | 0.3403 |
| GSFTSSSNFMSIR                       | 1421.6             | 2            | 2.4663 | 0.1709 |
| GSFVNGVFEVHKK                       | 1448.7             | 2            | 2.7333 | 0.3068 |
| GSGDGEMGKPR                         | 1091.2             | 2            | 2.7096 | 0.4054 |
| GSGDPSSSSSSGNPLVYLDVDANGKPLGR       | 2835.0             | 3            | 4.1887 | 0.4048 |
| GSGGGGGGGGQGSTNYGK                  | 1455.4             | 2            | 3.9085 | 0.3088 |
| GSGIFDESTPVQTR                      | 1494.6             | 2            | 3.562  | 0.3163 |
| GSGKGEEVEAGAAK                      | 1290.4             | 2            | 3.1978 | 0.1168 |
| GSGNLEAIHIK                         | 1252.4             | 2            | 3.0005 | 0.1707 |
| GSGNLEAIHIKK                        | 1380.6             | 2            | 3.2633 | 0.163  |

| Peptide Sequence                         | Peptide mass (m/z) | Charge State | Xcorr  | DelCn2 |
|------------------------------------------|--------------------|--------------|--------|--------|
| GSGSSFQSFNFNFDLDFK                       | 2174.3             | 2            | 2.9785 | 0.2811 |
| GSGTAEVELK                               | 991.1              | 2            | 3.4914 | 0.278  |
| GSGTAEVELKK                              | 1119.3             | 2            | 3.4012 | 0.2609 |
| GSGTAEVELKKGATLK                         | 1589.8             | 2            | 4.6512 | 0.309  |
| GSGVAQSPQQPPPPQQQQQQPPQPTPPK             | 2990.2             | 3            | 4.15   | 0.4385 |
| GSHFFPGNNVIYEK                           | 1609.8             | 2            | 4.0503 | 0.408  |
| GSHLVEALYLVCGER                          | 1646.9             | 2            | 5.1408 | 0.5302 |
| GSIDEVDKR                                | 1019.1             | 2            | 2.4056 | 0.216  |
| GSIFVVFDSIESAK                           | 1499.7             | 2            | 3.9198 | 0.3767 |
| GSIFVVFDSIESAKK                          | 1627.9             | 2            | 3.1305 | 0.3512 |
| GSIHDFPGFDPNQDAEALYTAMK                  | 2525.7             | 3            | 5.5836 | 0.5012 |
| GSIHDFPGFDPNQDAEALYTAMKGFSGDKEAILDITSR   | 4229.6             | 3            | 3.2994 | 0.2846 |
| GSILDAMRPQQLHATEITSSGFR                  | 2516.8             | 3            | 3.5254 | 0.156  |
| GSILDPSPEAAVVGGNVLTSSQR                  | 2168.4             | 2            | 2.8505 | 0.3521 |
| GSITISAEIKNR                             | 1533.7             | 2            | 3.5802 | 0.3363 |
| GSITSVQAIYVPADDLTDPAPATTFAHLDTTVLSR      | 3717.1             | 3            | 6.0402 | 0.5042 |
| GSIVWQEVFDDKAK                           | 1622.8             | 2            | 3.5302 | 0.3085 |
| GSKPESTKEPSTHIPPLDSK                     | 2136.3             | 3            | 3.9742 | 0.3723 |
| GSKGGHGAASPSEK                           | 1270.3             | 2            | 3.2005 | 0.301  |
| GSKPVRPPAPGHGFPLIK                       | 1856.2             | 2            | 2.563  | 0.1797 |
| GSKSPDLLMYQGPPDTAEIHK                    | 2261.6             | 2            | 5.2608 | 0.378  |
| GSLAADKVVEEIR                            | 1387.6             | 2            | 4.2137 | 0.3617 |
| GSLAADKVVEEIRR                           | 1543.8             | 2            | 3.9793 | 0.2783 |
| GSLAAVAHAQSLVEAQPNDKLVEDHLAVQSLIR        | 3581.0             | 3            | 8.9084 | 0.6005 |
| GSLAEAVGSPPPAATPTPTPTR                   | 2173.4             | 3            | 4.5371 | 0.3591 |
| GSLASLDSLR                               | 1019.1             | 2            | 2.8395 | 0.207  |
| GSLASLDSLRK                              | 1147.3             | 2            | 2.4895 | 0.1922 |
| GSLGATGEIKGPTVGGGLPGIGVQGLEGNLQMPGIK     | 3361.9             | 3            | 3.3901 | 0.1397 |
| GSLLEDVVPPIKPPKEIEDPNDKKPEEWDER          | 3601.0             | 3            | 4.057  | 0.2417 |
| GSLIDSSTIDPAVSKELAKEVEK                  | 2530.9             | 3            | 4.4354 | 0.4174 |
| GSLIDSSTIDPAVSKELAKEVEKMGAVFMDAPVSGGVAAR | 4205.8             | 3            | 4.8333 | 0.3314 |
| GSLLNQDGTLSLSQR                          | 1904.1             | 2            | 5.1975 | 0.4528 |
| GSLQILDQLLLPK                            | 1438.7             | 2            | 3.6455 | 0.1674 |
| GSLTFEPLTLVPIQTK                         | 1745.1             | 2            | 5.0963 | 0.3979 |
| GSLVKDSQYEMDSEFEGELADDLAGFYR             | 3173.4             | 3            | 4.8495 | 0.3455 |
| GSMAGSTGVHDTVVNQLLSK                     | 2002.2             | 2            | 3.1718 | 0.2873 |

| Peptide Sequence                  | Peptide mass (m/z) | Charge State | Xcorr  | DelCn2 |
|-----------------------------------|--------------------|--------------|--------|--------|
| GSMYMQQQPLLSTQDFNMAADIDPQNADVYHHR | 3952.3             | 3            | 5.333  | 0.3595 |
| GSEIKHTAEIAAACETFLK               | 2134.4             | 3            | 4.1522 | 0.2924 |
| GSENMDFREPTEEER                   | 1697.8             | 2            | 2.7699 | 0.1586 |
| GSENNVALGYDEGSIIVK                | 1736.9             | 2            | 3.6989 | 0.2495 |
| GSENPQLQTFTR                      | 1506.6             | 2            | 3.7108 | 0.3755 |
| GSENTTSHLHQAVAK                   | 1451.6             | 2            | 4.3623 | 0.4379 |
| GSENVLGPKSVAHIAKRKK               | 1891.3             | 2            | 2.4914 | 0.2099 |
| GSEPAINVAVHVFR                    | 1367.6             | 2            | 4.3701 | 0.4548 |
| GSEPAINVAVHVFRK                   | 1495.8             | 2            | 4.7222 | 0.4526 |
| GSEPAPAVLAEEAR                    | 1268.4             | 2            | 2.5691 | 0.1026 |
| GSEPFPEVAESVQCELESYR              | 2153.3             | 2            | 4.2392 | 0.4811 |
| GSEPFQVTRGDYAPILQK                | 1878.1             | 3            | 4.0232 | 0.3236 |
| GSEPLGEVVEQGTR                    | 1442.6             | 2            | 3.191  | 0.2212 |
| GSEPLNAAPYGIESMSQDTEVR            | 2223.4             | 2            | 3.2092 | 0.3264 |
| GSEPLVVISQK                       | 1085.3             | 2            | 3.7271 | 0.2629 |
| GSEPMESLPIALSK                    | 1443.7             | 2            | 3.8293 | 0.3769 |
| GSEPPQIDHAK                       | 1081.2             | 2            | 3.2782 | 0.3198 |
| GSEPRPQAPK                        | 938.1              | 2            | 2.6711 | 0.1501 |
| GSEQAQPDSPSAQLALIAASQSFLQPGGK     | 2756.0             | 3            | 5.9765 | 0.4922 |
| GSEQFTSKEER                       | 1169.2             | 2            | 2.8449 | 0.3282 |
| GSEQGPLPFHEK                      | 1197.3             | 2            | 2.5769 | 0.1503 |
| GSQLGPVPVTIR                      | 1224.4             | 2            | 2.9367 | 0.2604 |
| GSEQNERKKQTGLRLPEMQK              | 2229.6             | 2            | 2.441  | 0.1851 |
| GSSAGFDRHITIFSPEGR                | 1935.1             | 3            | 4.2683 | 0.3433 |
| GSSCFECTHYQSFLYR                  | 2058.2             | 2            | 4.1981 | 0.286  |
| GSSCFECTHYQSFLYREVVDGLEK          | 2928.2             | 3            | 3.3514 | 0.2346 |
| GSSGGSGAKPSDAASEARPATSTLNR        | 2504.6             | 3            | 3.6491 | 0.2173 |
| GSSGPTQINQVVSHPNQPLTITAHDDR       | 2871.1             | 3            | 3.712  | 0.2329 |
| GSSKQQSEEDLLLQDFSR                | 2068.2             | 2            | 5.5111 | 0.4307 |
| GSSLSGTDDGAQEVVKDILEDVVTSAIKEAAEK | 3363.6             | 3            | 3.9921 | 0.2331 |
| GSSNHNLLAAPR                      | 1237.4             | 2            | 3.327  | 0.3473 |
| GSSNSYAIK                         | 927.0              | 2            | 2.58   | 0.251  |
| GSSVDAPPRPCHTTPDSQFGTEHVLR        | 2793.0             | 3            | 4.8421 | 0.3089 |
| GSTAPVGGGAFPTIVER                 | 1616.8             | 2            | 4.7188 | 0.4721 |
| GSTDDKGPVAGWINALEAYQK             | 2221.4             | 3            | 5.073  | 0.5305 |
| GSTDNLMDIER                       | 1366.4             | 2            | 2.9708 | 0.2333 |

| Peptide Sequence                 | Peptide mass (m/z) | Charge State | Xcorr  | DelCn2 |
|----------------------------------|--------------------|--------------|--------|--------|
| GSTDNLMDIERAVDDGVNTFK            | 2413.6             | 2            | 4.5195 | 0.4013 |
| GSTHPQPGVSPPAAPAAPGPK            | 1922.1             | 3            | 5.36   | 0.4945 |
| GSTIETEQKEDKGEDSEPVTSK           | 2395.5             | 3            | 5.0769 | 0.345  |
| GSTPYGGVKLEDLIVK                 | 1676.9             | 2            | 4.0271 | 0.236  |
| GSTPYGGVKLEDLIVKDGLTDVYNK        | 2683.0             | 3            | 5.9345 | 0.5227 |
| GSVAGGAVYLVYDQELLGPSDK           | 2239.5             | 3            | 4.3451 | 0.2969 |
| GSVAGGAVYLVYDQELLGPSDKSQAALQK    | 2966.3             | 3            | 4.5698 | 0.3629 |
| GSVAYHADDGKIFHGSVGDVDFGPR        | 2544.7             | 3            | 3.5886 | 0.3165 |
| GSVSHDTVQPR                      | 1183.3             | 2            | 2.8174 | 0.3024 |
| GSYGDLGGPIITTQVTIPK              | 1918.2             | 2            | 5.5381 | 0.4895 |
| GSYGDLGGPIITTQVTIPKDLAGSIIGK     | 2773.2             | 3            | 4.7933 | 0.4967 |
| GSYGDLGGPIITTQVTIPKDLAGSIIGKGGQR | 3171.6             | 3            | 4.496  | 0.2054 |
| GSYNPVTHIYTAQDVKEVIEYAR          | 2654.9             | 3            | 4.9374 | 0.3563 |
| GSYNTLWTSGMQGDGEEQNKEALQDVEDENQ  | 3474.5             | 3            | 4.9515 | 0.1635 |
| GSYSLSHVYTPNDVR                  | 1695.8             | 2            | 4.4835 | 0.4528 |
| GSYTIGRDAQADAK                   | 1453.5             | 2            | 3.7743 | 0.3035 |
| GSYVSIHSSGFR                     | 1297.4             | 2            | 3.3375 | 0.3962 |
| GSYVSIHSSGFRDFLLKPELLR           | 2522.9             | 3            | 3.6432 | 0.2022 |
| GTADVTHDLQEMKEESR                | 1947.1             | 3            | 3.3888 | 0.2165 |
| GTAVVNGEFKDLSDLDDFK              | 1956.1             | 2            | 3.2213 | 0.3663 |
| GTAYTFFTPGNLK                    | 1417.6             | 2            | 4.0841 | 0.393  |
| GTAYVVYEDIFDAK                   | 1591.7             | 2            | 3.761  | 0.451  |
| GTAYVVYEDIFDAKNACDHLSGFNVCNR     | 3123.4             | 3            | 3.4188 | 0.1884 |
| GTDDSPKDSQEDLQER                 | 1820.8             | 3            | 4.5253 | 0.3452 |
| GTDLWLGVDALGLNIYEKDDKLTTPK       | 2776.1             | 3            | 3.6247 | 0.1559 |
| GTDVPKWISIMTER                   | 1633.9             | 3            | 4.2215 | 0.4587 |
| GTEAPAVVTEEDDDEETAPPVIAPRPDHTK   | 3317.5             | 3            | 5.1692 | 0.4061 |
| GTEDELDKYSEALKDAQEKLELAEK        | 2854.1             | 3            | 5.3887 | 0.299  |
| GTEDELDKYSEALKDAQEKLELAEEK       | 2982.2             | 3            | 5.0051 | 0.3904 |
| GTEDFIVESLDASFR                  | 1686.8             | 2            | 5.3817 | 0.436  |
| GTEDITSPHGIPLDLLDR               | 1950.1             | 2            | 3.3642 | 0.3357 |
| GTEDITSPHGIPLDLLDRVMIIR          | 2563.0             | 3            | 3.8315 | 0.3226 |
| GTEHSGSTVPSILNR                  | 1555.7             | 2            | 4.2242 | 0.4338 |
| GTEIGVLAK                        | 888.0              | 2            | 3.1361 | 0.2217 |
| GTEITHAVVIK                      | 1168.4             | 2            | 2.6857 | 0.2    |
| GTEITHAVVIKK                     | 1296.5             | 2            | 3.8707 | 0.3385 |

| Peptide Sequence                     | Peptide mass (m/z) | Charge State | Xcorr  | DelCn2 |
|--------------------------------------|--------------------|--------------|--------|--------|
| GTEVQVDDIKR                          | 1260.4             | 2            | 3.3316 | 0.2678 |
| GTEWVDPEDPTVIAENELLGAAAAIEAAAK       | 3053.3             | 3            | 5.7633 | 0.4703 |
| GTFADKEK                             | 896.0              | 1            | 2.1946 | 0.1418 |
| GTFDNAETKKEFGPVVIDYGK                | 2316.6             | 3            | 3.857  | 0.288  |
| GTFDNAETKKEFGPVVIDYGKVQSK            | 2759.1             | 3            | 4.6302 | 0.392  |
| GFESGLKGGVK                          | 1180.3             | 2            | 2.4081 | 0.2531 |
| GTGARPYTGK                           | 1008.1             | 2            | 2.5714 | 0.1944 |
| GTGASGSFK                            | 811.9              | 1            | 1.8145 | 0.2354 |
| GTGASGSFKLNK                         | 1167.3             | 2            | 3.1588 | 0.2238 |
| GTGASGSFKLNKK                        | 1295.5             | 2            | 4.0614 | 0.2791 |
| GTGGVDTAATGGVFDISNLDR                | 2024.1             | 2            | 5.8712 | 0.574  |
| GTGGVDTAATGGVFDISNLDRLGK             | 2322.5             | 3            | 3.3787 | 0.163  |
| GTGGVDTAAVGGVFDVSNADR                | 1966.1             | 2            | 5.6115 | 0.4991 |
| GTGGVDTAAVGGVFDVSNADRLGFSEVELVQMVDGK | 3797.2             | 3            | 4.9328 | 0.416  |
| GTGIVSAPVPK                          | 1026.2             | 2            | 2.985  | 0.3271 |
| GTGKWTASALEYGVPVTLIGEAVFAR           | 2808.2             | 3            | 4.556  | 0.288  |
| GTGLDEAMEWLVELK                      | 1793.0             | 2            | 4.581  | 0.4491 |
| GTGLQPGEELPDIAPPLVTPDEPK             | 2600.9             | 2            | 3.3371 | 0.4726 |
| GTGRIPDQLVILDMK                      | 1657.0             | 3            | 4.5659 | 0.2957 |
| GTGRIPDQLVILDMKHGVEAK                | 2278.7             | 3            | 4.9392 | 0.3179 |
| GTGYIKTELISVSEVHPSR                  | 2074.3             | 3            | 3.7405 | 0.2188 |
| GTHMENVYDFYKPNLASEYPIVDGK            | 2889.2             | 3            | 5.1157 | 0.4561 |
| GTHNFHNFTSQK                         | 1418.5             | 2            | 3.5532 | 0.3503 |
| GHTAVSSNDR                           | 1145.2             | 2            | 2.7946 | 0.3131 |
| GTIEILSDVQLIK                        | 1429.7             | 2            | 4.2658 | 0.2923 |
| GTINFLHADCDKFR                       | 1637.8             | 2            | 3.019  | 0.3508 |
| GTIQVITQGTSLK                        | 1346.6             | 2            | 3.6161 | 0.3359 |
| GTITDAPGFDPLRDAEVLK                  | 2172.4             | 3            | 3.9564 | 0.2661 |
| GTITIQDTGIGMTQEELVSNLGTIAR           | 2720.1             | 3            | 4.1179 | 0.2114 |
| GTITVHKTDSSNEPPKTFDFDTVFGPESK        | 3169.4             | 3            | 3.6515 | 0.2205 |
| GTITVSAQELKDNR                       | 1532.7             | 2            | 3.5866 | 0.266  |
| GTKALMDEVVK                          | 1191.4             | 2            | 3.0417 | 0.2689 |
| GTKNENKPYLFYFNIVK                    | 2076.4             | 3            | 3.5458 | 0.2997 |
| GTKVILHLKEDQTEYLEER                  | 2302.6             | 3            | 3.239  | 0.2309 |
| GTLDPVEKALR                          | 1199.4             | 2            | 2.5681 | 0.1425 |
| GTLGGLFSQILQGEDIVR                   | 1904.2             | 2            | 5.5909 | 0.4338 |

| Peptide Sequence                       | Peptide mass (m/z) | Charge State | Xcorr  | DelCn2 |
|----------------------------------------|--------------------|--------------|--------|--------|
| GTLGGMFGMLK                            | 1112.4             | 2            | 3.1519 | 0.4007 |
| GTLKGHNGWVTQIATTPQFPDMILSASR           | 3028.4             | 3            | 5.1185 | 0.1868 |
| GTLKPDSTHSNEFSDVDVGDLMQVK              | 2836.0             | 3            | 4.9975 | 0.3827 |
| GTLFAFAEAR                             | 1049.2             | 2            | 3.4804 | 0.1386 |
| GTLQSYLD                               | 897.0              | 1            | 1.9771 | 0.1371 |
| GTLSEHAGVISVLAQQAQK                    | 1996.2             | 3            | 4.3146 | 0.1213 |
| GTLGFWILSK                             | 1062.2             | 2            | 3.6269 | 0.2669 |
| GTLVQTK                                | 746.9              | 1            | 1.7997 | 0.1358 |
| GTMTTGHNVADLVVILK                      | 1770.1             | 2            | 3.8243 | 0.3551 |
| GTMVTIEGPR                             | 1061.2             | 2            | 2.8677 | 0.2913 |
| GTNDMKQQHVIETLIGK                      | 1913.2             | 3            | 3.4507 | 0.2547 |
| GTNVNQLNYR                             | 1179.3             | 2            | 2.7937 | 0.1612 |
| GTPGPPPAHGAALQPHPR                     | 1759.0             | 2            | 4.3463 | 0.4772 |
| GTPMKPNTQATPP                          | 1340.5             | 2            | 2.4945 | 0.1441 |
| GTPSQSPVVGR                            | 1085.2             | 2            | 2.5744 | 0.2821 |
| GTPSLLVSTAPHHR                         | 1560.7             | 2            | 3.5857 | 0.4338 |
| GTQGAEEVLR                             | 1060.1             | 2            | 3.0479 | 0.1407 |
| GTQGAEEVLRRAHEEQLKEAQAVPATLPELEATK     | 3545.9             | 3            | 5.0627 | 0.3051 |
| GTQGAEEVLRRAHEEQLKEAQAVPATLPELEATKASLK | 3945.4             | 3            | 4.1804 | 0.319  |
| GTQGATAGASSELDASK                      | 1551.6             | 2            | 5.0951 | 0.457  |
| GTQGVVTNFEIFR                          | 1468.6             | 2            | 3.8452 | 0.4071 |
| GTRPFVISR                              | 1033.2             | 2            | 2.6452 | 0.1723 |
| GTSAEQDNRFNSK                          | 1454.5             | 2            | 3.378  | 0.2667 |
| GTSFDAAATSGGSASSEK                     | 1631.6             | 2            | 4.1463 | 0.2934 |
| GTSFDAAATSGGSASSEKASSTSPVEISEWLDQK     | 3390.5             | 3            | 6.6923 | 0.4978 |
| GTSFDAAATSGGSASSEKASSTSPVEISEWLDQKLTQK | 3733.0             | 3            | 5.2623 | 0.379  |
| GTSKEDAMK                              | 967.1              | 2            | 2.4933 | 0.3076 |
| GTSQLHGMDLLVLLDLIGAPNPTFPNFFPNSAR      | 3555.1             | 3            | 4.7739 | 0.3435 |
| GTSYQSPHGIPIDLLDRLLIVSTTPYSEKDTK       | 3547.0             | 3            | 4.1203 | 0.2449 |
| GTTITLVLKEEASDYLELDTIK                 | 2453.8             | 2            | 4.407  | 0.395  |
| GTVAIVGATLAFATGK                       | 1456.7             | 2            | 3.4997 | 0.3252 |
| GTVEPQLER                              | 1100.2             | 2            | 2.9961 | 0.162  |
| GTVGFSGAELNVLNQAALK                    | 2019.2             | 2            | 3.1202 | 0.2025 |
| GTVIKVPLKVEQANNAR                      | 1838.1             | 3            | 3.4778 | 0.3336 |
| GTVLDQVPVNPSLYLIK                      | 1857.2             | 2            | 3.4744 | 0.1117 |
| GTVPDDAVEALADSLGKK                     | 1787.0             | 2            | 2.7651 | 0.3442 |



| Peptide Sequence                     | Peptide mass (m/z) | Charge State | Xcorr  | DelCn2 |
|--------------------------------------|--------------------|--------------|--------|--------|
| GTVQALHATGAR                         | 1182.3             | 2            | 3.3938 | 0.3447 |
| GTVRDYPDFSPSVDAEAIQK                 | 2196.4             | 2            | 5.7315 | 0.3769 |
| GTVRPANDFNPDADAK                     | 1688.8             | 2            | 3.846  | 0.3479 |
| GTVTDFPGFDER                         | 1341.4             | 2            | 4.0639 | 0.4878 |
| GTVTDFPGFDERADAETLR                  | 2098.2             | 2            | 3.0421 | 0.22   |
| GTVTDFPGFDERADAETLRK                 | 2226.4             | 2            | 2.8373 | 0.2424 |
| GTVVMKDGK                            | 935.1              | 2            | 2.4662 | 0.2645 |
| GTVVTGTLER                           | 1033.2             | 2            | 2.7315 | 0.2191 |
| GTWIHPEIDNPEYSPDPSIYAYDNFGVLGLDLWQVK | 4151.5             | 3            | 4.4003 | 0.3203 |
| GYLATFHQR                            | 1194.3             | 2            | 2.6956 | 0.2211 |
| GVAALTSDDPAVQAIVLDTASDVLDK           | 2470.8             | 2            | 6.4871 | 0.4917 |
| GVAALTSDDPAVQAIVLDTASDVLDKASSLIEEAK  | 3399.8             | 3            | 4.7374 | 0.3552 |
| GVAALTSDDPAVQAIVLDTASDVLDKASSLIEEAKK | 3528.0             | 3            | 4.4316 | 0.2733 |
| GVAASAGSSGENKK                       | 1263.3             | 2            | 3.385  | 0.3351 |
| GVAGAHGLLCLLSDHVDKR                  | 1962.3             | 2            | 4.6787 | 0.5526 |
| GVAGALRPLVQATVPATPEQPVLDLK           | 2642.1             | 3            | 4.1338 | 0.2416 |
| GVAGALRPLVQATVPATPEQPVLDLKRPFLSR     | 3399.0             | 3            | 3.7443 | 0.2582 |
| GVAGLRDGKEVTPVSSIPVETHR              | 2405.7             | 3            | 4.4919 | 0.3304 |
| GVAINFVKNDDIR                        | 1461.6             | 2            | 2.5612 | 0.1647 |
| GVAINFVTEEDKR                        | 1478.6             | 2            | 3.3477 | 0.366  |
| GVAINMVTEEDKR                        | 1462.7             | 2            | 3.5002 | 0.3485 |
| GVALLRPEPLHR                         | 1358.6             | 2            | 2.6899 | 0.3331 |
| GVAVDYLPER                           | 1119.3             | 2            | 2.7844 | 0.1133 |
| GVAVKVEEPR                           | 1084.3             | 2            | 3.0542 | 0.2326 |
| GVDDLDFFIGDEAIEKPTYATK               | 2445.7             | 2            | 5.1117 | 0.4575 |
| GVDEATIIDILTK                        | 1388.6             | 2            | 4.0144 | 0.2888 |
| GVDEGPNGLKLISEVIGER                  | 1983.2             | 2            | 4.7745 | 0.3885 |
| GVDEVTIVNILTNR                       | 1543.7             | 3            | 5.1986 | 0.4132 |
| GVDIVMDPLGGSDTAK                     | 1575.8             | 2            | 5.1497 | 0.5394 |
| GVDIVMDPLGGSDTAKGYNLLKPMGK           | 2678.1             | 2            | 4.5615 | 0.4896 |
| GVDLDQLLDMSYEQLMQLYSAR               | 2589.9             | 2            | 5.5963 | 0.4595 |
| GVDLFESFFPYQVTER                     | 1935.1             | 2            | 3.615  | 0.1822 |
| GVDLHEQSQQNK                         | 1383.4             | 2            | 2.9587 | 0.2092 |
| GVDLQENNPASR                         | 1300.4             | 2            | 2.7845 | 0.1633 |
| GVDLSGNDFKGGYFPENVK                  | 2044.2             | 2            | 4.0973 | 0.3121 |
| GVDNTFADELVELSTALEHQEYITFLEDLK       | 3441.7             | 3            | 4.722  | 0.3698 |

| Peptide Sequence                               | Peptide mass (m/z) | Charge State | Xcorr  | DelCn2 |
|------------------------------------------------|--------------------|--------------|--------|--------|
| GVDNTFADELVELSTALEHQEYITFLEDLKSFVK             | 3903.3             | 3            | 6.6586 | 0.5173 |
| GVEAGPDLLQ                                     | 999.1              | 2            | 2.9154 | 0.1517 |
| GVEEEEEEDGEMRE                                 | 1538.5             | 2            | 4.5295 | 0.3601 |
| GVEGLIDIENPNR                                  | 1426.6             | 2            | 3.5833 | 0.1209 |
| GVEHGPAAIR                                     | 1007.1             | 2            | 2.7155 | 0.2518 |
| GVEKPPHLAALILAR                                | 1585.9             | 3            | 5.2579 | 0.4569 |
| GVENVYTQHQPFLLHETLDHLIK                        | 2619.9             | 3            | 4.0627 | 0.3368 |
| GVEPSPSPIKPGDIKR                               | 1677.9             | 2            | 2.8449 | 0.3245 |
| GVETIANDVVSLATK                                | 1517.7             | 2            | 4.208  | 0.4003 |
| GVEVTVGHEQEEGGKWPYAGTAEAIK                     | 2744.0             | 2            | 5.5919 | 0.4278 |
| GVFHQTVSR                                      | 1031.2             | 2            | 2.6964 | 0.1959 |
| GVFVQSVLPYFVATK                                | 1656.0             | 2            | 3.7307 | 0.2525 |
| GVGAAATAVTQALNELLQHVK                          | 2092.4             | 3            | 6.0208 | 0.5264 |
| GVGASGSFR                                      | 837.9              | 2            | 2.8743 | 0.2052 |
| GVGDDQLGEESEERDDHLLPM                          | 2342.4             | 2            | 3.1419 | 0.3915 |
| GVGGSQPPDIDKTELVEPTEYLVVHLK                    | 2922.3             | 3            | 5.5024 | 0.3689 |
| GVGIISEGNETVEDIAAR                             | 1831.0             | 2            | 5.3818 | 0.4722 |
| GVGIISEGNETVEDIAARLNIPVSQVNPR                  | 3049.4             | 3            | 4.8585 | 0.4202 |
| GVGMVADPDNPLVLDILTGSSTSYFFDPKPITQYPHAVGK       | 4336.9             | 3            | 6.1413 | 0.4771 |
| GVGPVKENDEIEAGIHGLVSMTFK                       | 2528.9             | 3            | 5.373  | 0.4452 |
| GVGPVKENDEIEAGIHGLVSMTFKVEKPEY                 | 3274.7             | 3            | 4.215  | 0.261  |
| GVHFIFNKENF                                    | 1352.5             | 2            | 2.6676 | 0.3036 |
| GVHKEGSLGDELLPLGYSEPEQQEGASAGAPSPPTLELASR      | 4079.4             | 3            | 6.586  | 0.5065 |
| GVIDMGNSLIER                                   | 1304.5             | 2            | 3.1321 | 0.3258 |
| GVIFGQTSSTFTFADLAK                             | 1891.1             | 2            | 2.6938 | 0.2146 |
| GVIINTASVAAFEGQVGQAAYSASK                      | 2440.7             | 3            | 5.9681 | 0.5596 |
| GVIKDKYGKDATNVGDEGGFAPNILENSEALELVK            | 3693.1             | 3            | 5.1886 | 0.4092 |
| GVIKDKYGKDATNVGDEGGFAPNILENSEALELVKEAIDK       | 4249.7             | 3            | 5.3332 | 0.4589 |
| GVIKDKYGKDATNVGDEGGFAPNILENSEALELVKEAIDKAGYTEK | 4899.4             | 3            | 3.2928 | 0.239  |
| GVILREMQEVETNLQEVVFDYHLHATAYQNTALGR            | 3910.4             | 3            | 6.8689 | 0.5048 |
| GVINIIPGSGGIAGQR                               | 1509.7             | 2            | 3.8608 | 0.3796 |
| GVIPNSFDHIFTHISR                               | 1841.1             | 2            | 3.1512 | 0.3774 |
| GVIPSSLFLQDDEDDDELAKG                          | 2264.4             | 2            | 5.201  | 0.412  |
| GVIPSSLFLQDDEDDDELAKGSPEDLPLR                  | 3172.4             | 3            | 3.3107 | 0.3226 |
| GVITVKDGGK                                     | 917.1              | 2            | 2.5436 | 0.2386 |
| GVIVDKDFSHPQMPK                                | 1699.0             | 2            | 5.0504 | 0.3693 |

| Peptide Sequence                       | Peptide mass (m/z) | Charge State | Xcorr  | DelCn2 |
|----------------------------------------|--------------------|--------------|--------|--------|
| GVKEIDIAATLEHVR                        | 1651.9             | 3            | 5.0125 | 0.3692 |
| GVLETFSGTETNKIWPYVYAFLQTK              | 2894.3             | 3            | 4.7829 | 0.3264 |
| GVLFGVPGAFTPGCSK                       | 1233.4             | 2            | 2.8672 | 0.2258 |
| GVLFGVPGAFTPGCSK                       | 1537.8             | 2            | 3.3038 | 0.3025 |
| GVLHQVMVLDSEALR                        | 1668.0             | 2            | 3.5886 | 0.3568 |
| GVLKEWTLMLHGTQSAPYIDQVVR               | 2743.2             | 3            | 5.7509 | 0.472  |
| GVLKVFLENVIR                           | 1387.7             | 2            | 3.6475 | 0.3131 |
| GVLKVFLENVIRDAVITYTEHAK                | 2503.9             | 3            | 5.1325 | 0.4559 |
| GVLIDIDDLQTNQFK                        | 1719.9             | 2            | 4.9944 | 0.3921 |
| GVLVLYGPPGTGK                          | 1159.4             | 2            | 3.2441 | 0.3118 |
| GVLSTHQNIR                             | 1125.3             | 2            | 2.4522 | 0.133  |
| GVLTGPEYEALDALPDAER                    | 2017.2             | 2            | 4.0043 | 0.3176 |
| GVLTTTEKQNFLLFDMTTHPLTNNNIK            | 2991.4             | 3            | 5.0693 | 0.3565 |
| GVMGGQSAGPQHTAEAIQK                    | 2027.2             | 2            | 4.6067 | 0.4072 |
| GVMINKDVTHPR                           | 1367.6             | 2            | 3.6198 | 0.3881 |
| GVMLAVDAVIAELK                         | 1429.8             | 2            | 5.1631 | 0.3706 |
| GVMLAVDAVIAELKK                        | 1557.9             | 2            | 5.2283 | 0.4643 |
| GVNADKVGIEAAEMLLANLR                   | 2085.4             | 2            | 5.5057 | 0.4864 |
| GVNAIVYMIDAADREK                       | 1766.0             | 2            | 4.2778 | 0.3344 |
| GVNASAQK                               | 774.8              | 1            | 1.8826 | 0.1296 |
| GVNIGGAGSYIYEKPLAEGPQVTGPIEVPAAR       | 3212.6             | 3            | 8.1797 | 0.5829 |
| GVNIGGAGSYIYEKPLAEGPQVTGPIEVPAARAEER   | 3698.1             | 3            | 4.8383 | 0.365  |
| GVNLPGAAVDLPAVSEK                      | 1637.9             | 2            | 5.5587 | 0.468  |
| GVNLPGAAVDLPAVSEKDIQDLK                | 2350.7             | 2            | 5.1087 | 0.4937 |
| GVNLPGAAVDLPAVSEKDIQDLKFGVEQDVMVFAFIR  | 4192.7             | 3            | 5.3934 | 0.5545 |
| GVNLPGAAVDLPAVSEKDIQDLKFGVEQDVMVFAFIRK | 4320.9             | 3            | 6.139  | 0.556  |
| GVNLQEFNLNVTSVHLFK                     | 1946.2             | 2            | 3.2347 | 0.3405 |
| GVNTFSPEGR                             | 1064.1             | 2            | 2.4949 | 0.1663 |
| GVNTGAVGSYIYDRDPEGK                    | 1999.1             | 2            | 4.4727 | 0.4509 |
| GVNTGAVGSYIYDRDPEGKVQP                 | 2323.5             | 3            | 3.938  | 0.1897 |
| GVNVSALSR                              | 903.0              | 2            | 3.1849 | 0.2099 |
| GVNWAAFHPTMPLIVSGADDR                  | 2255.5             | 2            | 4.942  | 0.435  |
| GVPAGNSDTEGGQPGR                       | 1499.5             | 2            | 3.5637 | 0.4342 |
| GVPESLASGEGAGALPALDLAK                 | 2081.3             | 2            | 5.9354 | 0.4636 |
| GVPLVYEAFNWR                           | 1451.7             | 2            | 2.5002 | 0.3481 |
| GVPQIEVTFDIDANGIVHVSAC                 | 2310.6             | 2            | 3.5772 | 0.3925 |

| Peptide Sequence                         | Peptide mass (m/z) | Charge State | Xcorr  | DelCn2 |
|------------------------------------------|--------------------|--------------|--------|--------|
| GVPQIEVTFEIDVNGILR                       | 2000.3             | 2            | 4.3417 | 0.4418 |
| GVPTGFILPIR                              | 1170.4             | 2            | 2.5322 | 0.2003 |
| GVPVLHLIPSPFPEVWHTMDDNEENLDESTIDNLNK     | 4117.5             | 3            | 4.5202 | 0.3402 |
| GVPYRPTDLFDELVAHEVAR                     | 2285.5             | 3            | 4.1762 | 0.1687 |
| GVQGIIVNTEGIPIK                          | 1637.9             | 2            | 3.3673 | 0.3045 |
| GVQGPPGPAGPR                             | 1090.2             | 2            | 3.1469 | 0.1824 |
| GVQKHQDDLQDVIGR                          | 1708.9             | 2            | 3.3208 | 0.1252 |
| GVQLQTHPNVDK                             | 1336.5             | 2            | 3.4352 | 0.3009 |
| GVQLQTHPNVDKK                            | 1464.7             | 2            | 3.7295 | 0.3101 |
| GVQPLLDVAVLEYLPNPSEVQNYAILNKEDDSKEK      | 3831.2             | 3            | 5.2267 | 0.3635 |
| GVQVETISPGDGR                            | 1315.4             | 2            | 3.7995 | 0.301  |
| GVQVETISPGDGRTFPK                        | 1789.0             | 2            | 3.5779 | 0.203  |
| GVQYLNEIKDSVVAGFQWATK                    | 2354.6             | 2            | 5.3854 | 0.4568 |
| GVRPVSFSDWEKLDAAEEVAR                    | 2291.5             | 3            | 3.9489 | 0.2136 |
| GVSFYEVPPHLFAVADTVYR                     | 2268.6             | 2            | 2.4072 | 0.1111 |
| GVSKAHEHINK                              | 1182.4             | 2            | 3.0644 | 0.1807 |
| GVSQMPLR                                 | 888.1              | 2            | 2.4278 | 0.1769 |
| GVSSSESSGDREK                            | 1238.2             | 2            | 2.8706 | 0.3052 |
| GVSSPDHIFLPIPNWEHKENPETEEDVGPVVQHIYELR   | 4409.8             | 3            | 4.9678 | 0.3262 |
| GVSSQETAGIGASAHLVNFK                     | 1974.2             | 2            | 5.3014 | 0.3123 |
| GVTDHTQR                                 | 914.0              | 2            | 2.4274 | 0.1535 |
| GVTDVVITREEAER                           | 1574.7             | 2            | 2.7414 | 0.1235 |
| GVTFLFPIQAK                              | 1221.5             | 2            | 3.2452 | 0.2728 |
| GVTFNVTTVDTK                             | 1282.4             | 2            | 2.7379 | 0.2557 |
| GVTHNIALLR                               | 1094.3             | 2            | 3.0454 | 0.2064 |
| GVTHTVPIYEGYALPHAILR                     | 2208.5             | 3            | 5.7182 | 0.439  |
| GVTIASGGVLPNIHPELLAK                     | 1987.3             | 2            | 5.7385 | 0.53   |
| GVTIASGGVLPNIHPELLAKK                    | 2115.5             | 2            | 5.4275 | 0.4657 |
| GVTIASGGVLPR                             | 1127.3             | 2            | 3.5495 | 0.2918 |
| GVTIGIMDDGIDYLHPDLASNYNAEASYDFSSNDPYPYPR | 4455.7             | 3            | 5.235  | 0.4158 |
| GVTIIGPATVGGIKPGCFK                      | 1816.2             | 2            | 3.4584 | 0.2849 |
| GVTIPYRPKPSSSPVIFAGGQDR                  | 2430.7             | 3            | 4.2666 | 0.4042 |
| GVTSEEFDKFLEER                           | 1686.8             | 2            | 3.538  | 0.2964 |
| GVTSVSQIFHSPDLAIR                        | 1828.1             | 2            | 3.4251 | 0.2454 |
| GVTVGEGVR                                | 874.0              | 2            | 2.6712 | 0.1737 |
| GVVDEQANSAALKEQLK                        | 1801.0             | 2            | 4.2167 | 0.1622 |

| Peptide Sequence                 | Peptide mass (m/z) | Charge State | Xcorr  | DelCn2 |
|----------------------------------|--------------------|--------------|--------|--------|
| GVVDSDDLPLNVS                    | 1486.6             | 2            | 4.9417 | 0.4375 |
| GVVDEDIPLNLSR                    | 1514.7             | 2            | 4.7411 | 0.3466 |
| GVVDEDLPLNISR                    | 1514.7             | 1            | 4.542  | 0.3822 |
| GVVEVTHDLQK                      | 1225.4             | 2            | 3.6319 | 0.1952 |
| GVVEVTHDLQKHLAAGLGLTEAIDKNKADLSR | 3329.8             | 3            | 4.9648 | 0.4569 |
| GVVFDVTSKGEFYGR                  | 1661.8             | 2            | 3.966  | 0.4793 |
| GVVGGVTGIITKPVGAK                | 1683.0             | 2            | 4.1652 | 0.4275 |
| GVVGGPAAIAALGGGGAGPPVGGGGGR      | 2283.6             | 2            | 2.7275 | 0.2895 |
| GVVHVYTR                         | 931.1              | 1            | 1.7806 | 0.2054 |
| GVVKDEPETR                       | 1130.2             | 2            | 2.5899 | 0.1345 |
| GVVPLAGTDGETTTQGLDGLSER          | 2274.4             | 2            | 5.407  | 0.3984 |
| GVVPLAGTNGETTTQGLDGLSER          | 2273.4             | 2            | 5.5655 | 0.6229 |
| GVVQELQQAIK                      | 1300.5             | 2            | 3.9222 | 0.3877 |
| GVVQELQQAIKLEAR                  | 1770.0             | 2            | 4.3407 | 0.4514 |
| GVVVLAKSYNEQR                    | 1463.7             | 2            | 3.523  | 0.2529 |
| GVYSEETLR                        | 1054.1             | 2            | 2.8439 | 0.2541 |
| GWDEALLTMSK                      | 1251.4             | 2            | 3.5494 | 0.3019 |
| GWDEALLTMSKGEK                   | 1565.8             | 2            | 2.9771 | 0.2327 |
| GWDENVYYTVPLVR                   | 1711.9             | 2            | 3.837  | 0.3865 |
| GWEEGVAQMSVGQR                   | 1534.7             | 2            | 3.3198 | 0.2397 |
| GWKEVHELYK                       | 1289.5             | 2            | 3.3672 | 0.1969 |
| GWNYILEKYDGHLPIEIK               | 2189.5             | 2            | 5.5516 | 0.363  |
| GWQDVTATSAYK                     | 1327.4             | 2            | 4.3857 | 0.3878 |
| GWQDVTATSAYKK                    | 1455.6             | 2            | 3.6777 | 0.2818 |
| GWTGQESLSDSDPEMWELLQR            | 2465.6             | 2            | 3.6875 | 0.2802 |
| GWTQWIEGDELHLEMR                 | 2001.2             | 2            | 3.8082 | 0.4118 |
| GWVLGPNNYYSFASQQKPEDTTIPSTELAK   | 3471.8             | 3            | 3.991  | 0.2347 |
| GYADIVQLLLAK                     | 1304.6             | 2            | 4.0193 | 0.3064 |
| GYADSPSK                         | 824.9              | 1            | 2.1312 | 0.2697 |
| GYAFIEYEHER                      | 1414.5             | 2            | 3.2492 | 0.337  |
| GYAFNHSADFETVR                   | 1614.7             | 2            | 3.8131 | 0.2977 |
| GYAFVQYSNER                      | 1334.4             | 2            | 3.448  | 0.3989 |
| GYAVNVFDIQGGFDNPQVR              | 2168.4             | 2            | 4.553  | 0.1248 |
| GYAWGLNELKPISK                   | 1576.8             | 2            | 3.064  | 0.3269 |
| GYAYVEFENPDEAEK                  | 1761.8             | 2            | 5.3585 | 0.4793 |
| GYAYVEFENPDEAEKALK               | 2074.2             | 2            | 5.1625 | 0.4562 |

| Peptide Sequence                           | Peptide mass (m/z) | Charge State | Xcorr  | DelCn2 |
|--------------------------------------------|--------------------|--------------|--------|--------|
| GYDQSAYDGKDYIALNEDLR                       | 2307.4             | 3            | 4.2204 | 0.128  |
| GYDSDNPR                                   | 923.9              | 2            | 2.4361 | 0.1335 |
| GYDVIAQAQSGTGK                             | 1395.5             | 2            | 5.1753 | 0.1715 |
| GYEDYLSPLQPLMDNLESQTYEVFEKDPIK             | 3692.1             | 3            | 4.0437 | 0.1949 |
| GYEEVHVPALKPKPFGSEEQLLPVEK                 | 2922.3             | 3            | 3.8807 | 0.3244 |
| GYEEVHVPALKPKPFGSEEQLLPVEKLPK              | 3260.8             | 3            | 3.2804 | 0.1689 |
| GYEEWLLNEIR                                | 1422.6             | 2            | 3.9105 | 0.2355 |
| GYEIDEDIVSR                                | 1296.4             | 2            | 2.8998 | 0.324  |
| GYELAHQR                                   | 974.1              | 2            | 2.4883 | 0.3814 |
| GYELLFQPEVVR                               | 1450.7             | 2            | 3.6484 | 0.3452 |
| GYELVPNLEIPTVNPVAIKPGTVAIPAIGAQYSMFPAAPAPK | 4305.0             | 3            | 4.4135 | 0.2005 |
| GYEVIYLTEPVDEYCIQALPEFDGKR                 | 3049.4             | 3            | 4.1403 | 0.3763 |
| GYFEYIEENKYSR                              | 1698.8             | 2            | 3.9908 | 0.3966 |
| GYFIQPTVFGDVQDGMTIAKEEIFGPVMQILK           | 3574.2             | 3            | 4.1361 | 0.1966 |
| GYFNEELSEILSDPSDDTKGFFDPNTEENLTYLQLK       | 4171.4             | 3            | 5.5284 | 0.3515 |
| GYFPRFEPPAPLSYDSRPR                        | 2285.5             | 3            | 3.4541 | 0.3296 |
| GYFVQPTVFSNVTDEMRR                         | 1991.2             | 2            | 6.1177 | 0.5359 |
| GYGFGLIKLDLK                               | 1324.6             | 2            | 3.6426 | 0.2709 |
| GYGHSRPPDRDFPADFFER                        | 2267.4             | 3            | 3.2897 | 0.1451 |
| GYGPDGHFGMFPANYVELIE                       | 2214.4             | 2            | 4.0123 | 0.2771 |
| GYGYGQGAGTLSTDKGESLGIK                     | 2160.3             | 2            | 3.4203 | 0.3128 |
| GYGYGQGAGTLSTDKGESLGIKHEEAPGHRPTTNPASK     | 3985.2             | 3            | 4.884  | 0.3438 |
| GYHQYAYDGKDYIALK                           | 1906.1             | 2            | 5.1753 | 0.408  |
| GYHQYAYDGKDYIALKEDLR                       | 2419.6             | 2            | 5.9705 | 0.4854 |
| GYIEEKELDAFFLHMLMK                         | 2215.6             | 3            | 5.6078 | 0.4377 |
| GYIFLEYASPAHAVDAVK                         | 1952.2             | 2            | 5.3514 | 0.5242 |
| GYIGVVNR                                   | 878.0              | 1            | 2.0666 | 0.2244 |
| GYISPYFINTSK                               | 1390.6             | 2            | 4.2581 | 0.4207 |
| GYIWNYGTLPQTWEDPHEKDK                      | 2578.8             | 3            | 3.4736 | 0.1767 |
| GYKHPVLLLHPLGGWTK                          | 1917.3             | 3            | 4.3853 | 0.4112 |
| GYKHPVLLLHPLGGWTKDDDVPDWR                  | 3029.4             | 3            | 4.2685 | 0.3969 |
| GYKIPVIENLGATLDQFDAIDFSDNEIR               | 3155.5             | 3            | 5.508  | 0.3758 |
| GYKIPVIENLGATLDQFDAIDFSDNEIRK              | 3283.6             | 3            | 4.1448 | 0.252  |
| GYKLSPEDYTLK                               | 1414.6             | 3            | 3.2929 | 0.3266 |
| GYKLSPEDYTLKVSQAGK                         | 1985.2             | 2            | 4.9097 | 0.4035 |
| GYKQQLVEK                                  | 1093.3             | 2            | 2.4654 | 0.1781 |

| Peptide Sequence                             | Peptide mass (m/z) | Charge State | Xcorr  | DelCn2 |
|----------------------------------------------|--------------------|--------------|--------|--------|
| GYLADPAKFPEAR                                | 1435.6             | 2            | 3.3624 | 0.2561 |
| GYLDKLEPSK                                   | 1150.3             | 2            | 2.6557 | 0.2155 |
| GYLDKLEPSKITK                                | 1492.7             | 2            | 4.0506 | 0.264  |
| GYLEDEHAAAHAEEAFFNTILPAFDPALR                | 3217.5             | 3            | 3.4183 | 0.1723 |
| GYLGPEQLPDCLK                                | 1433.7             | 2            | 2.9826 | 0.1487 |
| GYLGPEQLPDCLKGCDVVVIPAGVPR                   | 2697.2             | 3            | 4.595  | 0.2673 |
| GYLNKDTHDQLSEPSEVR                           | 2089.2             | 2            | 6.2749 | 0.4598 |
| GYLPSHYER                                    | 1122.2             | 2            | 2.6149 | 0.1423 |
| GYLSETVSNALGPQGR                             | 1649.8             | 2            | 3.8177 | 0.3044 |
| GYLVTQDELDQTLEEFKAQFGDKPSEGRPR               | 3455.7             | 3            | 5.5255 | 0.3915 |
| GYNDYYEESYFTTR                               | 1923.9             | 2            | 5.0428 | 0.5197 |
| GYNPGLLVHPDLAYLQAEGGGDR                      | 2413.6             | 3            | 3.7617 | 0.2848 |
| GYPEEKKEEEGSANR                              | 1723.8             | 2            | 4.3447 | 0.3963 |
| GYPEEKKEEEGSANRRPEDQELESLSAIEAELEK           | 3892.1             | 3            | 4.9916 | 0.3501 |
| GYPEEKKEEEGSANRRPEDQELESLSAIEAELEKVAHQQLQALR | 4909.3             | 3            | 4.2427 | 0.2563 |
| GYPGVQAPEDLEWER                              | 1746.9             | 2            | 4.4375 | 0.3313 |
| GYPHLCSICDLPVHSNK                            | 1884.2             | 2            | 3.0582 | 0.1537 |
| GYPHLCSICDLPVHSNKEWSQHINGASHSR               | 3374.7             | 3            | 4.6715 | 0.2681 |
| GYPHWPARIDEMPEAAVK                           | 2068.3             | 2            | 4.4009 | 0.3121 |
| GYPTFHYYHYGK                                 | 1533.7             | 2            | 2.588  | 0.288  |
| GYPTLLLFR                                    | 1080.3             | 2            | 2.6835 | 0.2393 |
| GYPTLLWFR                                    | 1153.4             | 2            | 2.4497 | 0.338  |
| GYQGDPSALLELLDPEQANFLDHYLDVPVDLSK            | 3875.2             | 3            | 5.9658 | 0.4898 |
| GYRDINEIDINMNDPLFTK                          | 2269.5             | 3            | 4.9189 | 0.2689 |
| GYRLPTSALVNLSHGSR                            | 1829.1             | 3            | 4.34   | 0.2685 |
| GYSFSLTTFSPSGK                               | 1479.6             | 2            | 4.9187 | 0.4157 |
| GYSFTTTAER                                   | 1133.2             | 2            | 3.698  | 0.4499 |
| GYSFTTTAEREIVR                               | 1630.8             | 2            | 2.5812 | 0.1223 |
| GYSFVTTAER                                   | 1131.2             | 2            | 2.6661 | 0.178  |
| GYTSWAIGLSVADLAESIMK                         | 2113.4             | 2            | 5.5862 | 0.5582 |
| GYVAKSPDEAYAIKK                              | 1711.9             | 3            | 3.3519 | 0.2526 |
| GYVKEQFAWR                                   | 1284.4             | 2            | 2.7045 | 0.268  |
| GYWASLDASTQTTHELTIPNNLIGCIIGR                | 3146.5             | 3            | 4.2085 | 0.1232 |
| GYYEQTGVGPLPVVLFNGMPFER                      | 2571.9             | 2            | 5.1035 | 0.4399 |
| HAAENPGK                                     | 823.9              | 1            | 1.7687 | 0.1391 |
| HAAENPGKYNILGTNTIMDK                         | 2188.5             | 2            | 6.0234 | 0.4658 |

| Peptide Sequence                    | Peptide mass (m/z) | Charge State | Xcorr  | DelCn2 |
|-------------------------------------|--------------------|--------------|--------|--------|
| HAAEVARDNLAEELEGVAGR                | 2108.3             | 3            | 4.0866 | 0.3842 |
| HAAGVLAQEDLVGLLEPINTR               | 2217.5             | 2            | 4.9894 | 0.5133 |
| HAALVSQPETTK                        | 1282.4             | 2            | 3.5388 | 0.3644 |
| HAASTVQILGAEK                       | 1325.5             | 2            | 4.0896 | 0.4542 |
| HAAVALGQAR                          | 994.1              | 2            | 2.7116 | 0.2439 |
| HAAVLVETIKK                         | 1209.5             | 2            | 3.0578 | 0.4169 |
| HADDDRPPR                           | 1079.1             | 2            | 2.5987 | 0.3099 |
| HADDHTPK                            | 920.9              | 2            | 2.6749 | 0.236  |
| HADEFLLDLGHHHER                     | 1689.8             | 2            | 2.8291 | 0.258  |
| HADGSFSDEMNTILDNLAAR                | 2178.3             | 2            | 6.6238 | 0.5604 |
| HADGSFSDEMNTILDNLAARDFIN            | 2667.8             | 2            | 4.6637 | 0.3354 |
| HADGSFSDEMNTILDNLAARDFINWLIQTK      | 3437.8             | 2            | 5.2362 | 0.419  |
| HADHSSLTLGSGSSTTR                   | 1714.8             | 2            | 4.7284 | 0.5024 |
| HADIVTTTTHK                         | 1224.3             | 2            | 3.2354 | 0.3581 |
| HADLEIR                             | 853.9              | 1            | 2.7762 | 0.232  |
| HADQYKEQMEK                         | 1407.5             | 2            | 3.9108 | 0.3198 |
| HADVGVALLANAPER                     | 1533.7             | 2            | 2.8621 | 0.1902 |
| HAEATLGSGNLR                        | 1226.3             | 2            | 3.9871 | 0.4357 |
| HAEELER                             | 883.9              | 2            | 2.5749 | 0.1743 |
| HAEPPWVHLHYYGLR                     | 1908.1             | 2            | 2.7825 | 0.2876 |
| HAEGQLSFIQHSLINPEIFCFADYPCHTVATDILK | 3960.5             | 3            | 4.982  | 0.3594 |
| HAEGTFTSDVSSYLEGQ                   | 1828.9             | 2            | 4.3271 | 0.3904 |
| HAEGTFTSDVSSYLEGQAAK                | 2099.2             | 2            | 6.4406 | 0.6536 |
| HAEGTFTSDVSSYLEGQAAKEFIAWLK         | 3086.4             | 3            | 7.8184 | 0.5967 |
| HAEGTFTSDVSSYLEGQAAKEFIAWLKGR       | 3299.6             | 3            | 5.3118 | 0.4117 |
| HAEKAPTNIVYK                        | 1371.6             | 2            | 2.8513 | 0.2498 |
| HAEKIEEVKK                          | 1211.4             | 2            | 3.1072 | 0.2313 |
| HAEMVHTGLK                          | 1123.3             | 2            | 2.8597 | 0.4201 |
| HAEPEQNWEAVDGSQTETEEKK              | 2414.5             | 3            | 3.9814 | 0.2854 |
| HAEQERDELADEITNSASGK                | 2201.3             | 3            | 5.6916 | 0.4073 |
| HAESVGDGER                          | 1057.1             | 2            | 2.9799 | 0.2754 |
| HAFEIFR                             | 920.0              | 2            | 2.4951 | 0.1573 |
| HAFEIFRR                            | 1076.2             | 2            | 2.4268 | 0.2348 |
| HAFEIHLLTGENPLQVLVNAIINSGPREDSTR    | 3656.1             | 3            | 5.5065 | 0.3832 |
| HAFFEGLNWENIR                       | 1633.8             | 2            | 3.0568 | 0.3523 |
| HAGGGVHIEPR                         | 1130.2             | 2            | 2.8676 | 0.3422 |



| Peptide Sequence                 | Peptide mass (m/z) | Charge State | Xcorr  | DelCn2 |
|----------------------------------|--------------------|--------------|--------|--------|
| HAGGVTGGWDNLLAVIPGGSSSTPLIPK     | 2616.0             | 3            | 4.4782 | 0.3153 |
| HAGNLT LHANSVR                   | 1390.5             | 2            | 3.056  | 0.3419 |
| HAGNNESHSSR                      | 1196.2             | 2            | 2.5579 | 0.2942 |
| HAGTYDQK                         | 920.0              | 2            | 2.4633 | 0.2478 |
| HAHGDQYK                         | 956.0              | 1            | 2.3109 | 0.1807 |
| HAHGDQYKATDFVADR                 | 1831.9             | 2            | 3.9282 | 0.4259 |
| HAHSILQFQFAEVK                   | 1655.9             | 3            | 4.5429 | 0.3649 |
| HAIPNLVK                         | 892.1              | 2            | 2.7604 | 0.1025 |
| HAIYDKLDDDGLIAPGVR               | 1969.2             | 2            | 5.8031 | 0.5012 |
| HAKPPDVDLK                       | 1120.3             | 2            | 3.0134 | 0.3568 |
| HAKPPDVDLKK                      | 1248.5             | 2            | 2.9717 | 0.3777 |
| HALDAHQQSIPAVLEIPSK              | 2055.3             | 3            | 3.5609 | 0.222  |
| HALDAHQQSIPAVLEIPSKEHPYDAAK      | 2967.3             | 3            | 7.1961 | 0.4987 |
| HALDAHQQSIPAVLEIPSKEHPYDAAKDSILR | 3552.0             | 3            | 6.7034 | 0.4537 |
| HALIIYDDLK                       | 1288.5             | 2            | 3.5824 | 0.2765 |
| HALIIYDDLKQAVAYR                 | 1977.3             | 3            | 5.4612 | 0.4686 |
| HALKGAGTNEK                      | 1126.2             | 2            | 2.8621 | 0.2769 |
| HALLEADVAAHQDR                   | 1546.7             | 3            | 3.2518 | 0.3    |
| HALLEADVAAHQDRIDGITIQAR          | 2514.8             | 3            | 3.4623 | 0.301  |
| HALNSR                           | 697.8              | 1            | 1.8674 | 0.1546 |
| HALPPGFVLKK                      | 1207.5             | 3            | 3.8837 | 0.1884 |
| HAMNLEAVNTYEGTHDIHALILGR         | 2677.0             | 3            | 5.497  | 0.4997 |
| HANAKPFEVPFLK                    | 1498.8             | 2            | 4.2899 | 0.4129 |
| HANAKPFEVPFLKF                   | 1645.9             | 2            | 3.5934 | 0.2554 |
| HANEEEEKAAATTAQEYLK              | 2133.3             | 2            | 3.6729 | 0.3408 |
| HANPGGPIYFLK                     | 1314.5             | 2            | 2.9714 | 0.3243 |
| HAPGLIAALAYETANFYQK              | 2079.3             | 2            | 4.156  | 0.5194 |
| HAPINSAQHLDNVDQTGPK              | 2043.2             | 3            | 3.7356 | 0.1282 |
| HAPSLHGSTELLPLSR                 | 1715.9             | 2            | 3.6994 | 0.3298 |
| HAQANGFSVVR                      | 1186.3             | 2            | 2.7765 | 0.3372 |
| HAQAQYAYPGAR                     | 1333.4             | 2            | 3.1439 | 0.1679 |
| HAQAVEELTEQLEQFKR                | 2057.3             | 3            | 4.7076 | 0.3396 |
| HAQGTVLHR                        | 1019.1             | 2            | 2.7922 | 0.363  |
| HAQTISGHALR                      | 1191.3             | 2            | 2.8413 | 0.3296 |
| HARPPDPPASAPPDSSSSNSASQDTK       | 2518.6             | 3            | 3.5096 | 0.2401 |
| HASAPSHVQPSDSEK                  | 1577.6             | 2            | 2.5455 | 0.1465 |

| Peptide Sequence                      | Peptide mass (m/z) | Charge State | Xcorr  | DelCn2 |
|---------------------------------------|--------------------|--------------|--------|--------|
| HASAVASKEDSWTLFKPPPVPVDNSSAK          | 3114.5             | 3            | 4.3725 | 0.1465 |
| HASLQNSQR                             | 1041.1             | 2            | 2.7693 | 0.256  |
| HASPEDIKK                             | 1025.1             | 2            | 2.5341 | 0.2455 |
| HASPILPITEFSDIPR                      | 1794.0             | 3            | 4.7465 | 0.4223 |
| HASQKDYSSGFGGK                        | 1469.5             | 2            | 2.4842 | 0.252  |
| HASSGSFLPSANEHLK                      | 1682.8             | 2            | 5.3207 | 0.4251 |
| HASSGSFLPSANEHLKEDLNLR                | 2423.6             | 3            | 4.9966 | 0.4231 |
| HATAEEVEEEER                          | 1429.4             | 2            | 2.8566 | 0.3458 |
| HATALEELSEQLEQAK                      | 1797.9             | 2            | 4.733  | 0.4903 |
| HATALEELSEQLEQAKR                     | 1954.1             | 3            | 7.1276 | 0.5275 |
| HATGNYIIIMDADLSHHPK                   | 2134.4             | 3            | 4.5045 | 0.3524 |
| HAVGNNEFGTVDHER                       | 1682.7             | 2            | 4.1088 | 0.4763 |
| HAVSDPSILDSLNLNEDEREVLINNINR          | 3192.4             | 3            | 4.3781 | 0.4272 |
| HAVSDPSILDSLNLNEDEREVLINNINRR         | 3348.6             | 3            | 3.7246 | 0.2639 |
| HAVSEGTK                              | 828.9              | 2            | 3.0726 | 0.3944 |
| HAVSEGTKAVTK                          | 1228.4             | 2            | 4.3002 | 0.5146 |
| HAVTEAEIQQLKR                         | 1523.7             | 2            | 4.3999 | 0.3438 |
| HAVVNLINYQDDAELATR                    | 2043.2             | 2            | 6.1522 | 0.4874 |
| HAVVVGR                               | 737.9              | 1            | 1.8443 | 0.2771 |
| HAYGDQYR                              | 1010.0             | 2            | 2.5948 | 0.3105 |
| HAYGLGEHYNSVTR                        | 1604.7             | 2            | 3.8047 | 0.4608 |
| HCAEPFTEYWTCIDYTGQQLFR                | 2710.0             | 3            | 4.5434 | 0.2936 |
| HDADGQATLLNLLL                        | 1650.9             | 2            | 5.2609 | 0.4731 |
| HDDFFPYADGPHQFWTGYFSSRPALK            | 3088.3             | 3            | 3.5552 | 0.2771 |
| HDDYLVMLK                             | 1134.3             | 2            | 3.1004 | 0.4173 |
| HDEFER                                | 832.8              | 1            | 2.5373 | 0.1479 |
| HDEFERHAEGTFTSDVSSYLEGQAAK            | 2913.0             | 3            | 6.8143 | 0.5405 |
| HDEFERHAEGTFTSDVSSYLEGQAAKEFIAWLVK    | 3900.2             | 3            | 6.9712 | 0.5597 |
| HDFSTVLTVFPILR                        | 1645.9             | 2            | 4.5933 | 0.4491 |
| HDGHDDDVIDIEDDLDDVIEEVEDSKPDTTAPPSSPK | 4062.1             | 3            | 7.3969 | 0.5803 |
| HDGITVAVHK                            | 1077.2             | 2            | 2.7851 | 0.3124 |
| HDGKEVDEGAWETK                        | 1601.7             | 3            | 3.9231 | 0.431  |
| HDGYGSHGPLLPLPSR                      | 1703.9             | 2            | 4.1595 | 0.4358 |
| HDHAVSLLTAASPTIALLLER                 | 2229.6             | 3            | 4.2337 | 0.3272 |
| HDKVEDALNLKEEFDRLDSSAVLDTGK           | 3046.3             | 3            | 4.7986 | 0.3265 |
| HDKYMADMDELFSQVDEK                    | 2202.4             | 2            | 4.5844 | 0.391  |

| Peptide Sequence                       | Peptide mass (m/z) | Charge State | Xcorr  | DelCn2 |
|----------------------------------------|--------------------|--------------|--------|--------|
| HDLGHFMLR                              | 1126.3             | 2            | 2.4256 | 0.2378 |
| HDLPLHPAVVKPHLGHVPDYLVPPALR            | 2989.5             | 3            | 3.4948 | 0.3118 |
| HDNEEAMK                               | 974.0              | 2            | 2.5987 | 0.2343 |
| HDNFPHNQR                              | 1165.2             | 2            | 2.5268 | 0.1558 |
| HDPQAEELAK                             | 1209.3             | 2            | 3.2917 | 0.3116 |
| HDSEQDNSDNNTIFVQGLGENVTIESVADYFK       | 3587.7             | 3            | 7.1421 | 0.3848 |
| HDSPEDVK                               | 927.0              | 2            | 2.949  | 0.2207 |
| HDSPEDVKR                              | 1083.1             | 2            | 2.8718 | 0.2744 |
| HDSPEDVKRR                             | 1239.3             | 2            | 2.6311 | 0.2195 |
| HDSSWVEELLMLHR                         | 1753.0             | 3            | 5.4148 | 0.3367 |
| HDVKFPLDSTGSELKQK                      | 1930.2             | 3            | 4.0325 | 0.3197 |
| HEAFESDLAAHQDR                         | 1626.7             | 3            | 3.6298 | 0.2525 |
| HEAFESDLAAHQDRVEQIAAIAQELNELDYDSPSVNAR | 4417.7             | 3            | 5.7118 | 0.4156 |
| HEALKENGVTHPIDYHTTDYVDEIK              | 2926.1             | 3            | 5.2767 | 0.3513 |
| HEALKENGVTHPIDYHTTDYVDEIKK             | 3054.3             | 3            | 5.9981 | 0.4878 |
| HEAPMQMASAQDAR                         | 1543.7             | 2            | 3.717  | 0.4254 |
| HEDLKDMLEFPAQELR                       | 1972.2             | 2            | 2.8996 | 0.2192 |
| HEDLKDMLEFPAQELRK                      | 2100.4             | 3            | 4.1466 | 0.2731 |
| HEEAPGHRPTTNPNAK                       | 1843.9             | 2            | 3.477  | 0.2675 |
| HEEEEAER                               | 1228.3             | 2            | 3.1943 | 0.3027 |
| HEEEKFFLNAK                            | 1392.5             | 2            | 3.1542 | 0.2812 |
| HEEFKKYEMMK                            | 1500.8             | 2            | 3.3879 | 0.2655 |
| HEEKVAAYDKLEK                          | 1560.7             | 2            | 4.239  | 0.3882 |
| HEEQPAPGYDTHGR                         | 1594.6             | 2            | 3.8586 | 0.4388 |
| HEERPDEHGFVAR                          | 1579.7             | 3            | 3.3153 | 0.2002 |
| HEERQDEHGFISR                          | 1640.7             | 2            | 3.2684 | 0.2434 |
| HEERQDEHGYISR                          | 1656.7             | 3            | 4.1477 | 0.3649 |
| HEHQLMLMR                              | 1195.4             | 2            | 2.8172 | 0.2603 |
| HEHQVMLMR                              | 1181.4             | 2            | 2.6893 | 0.3749 |
| HEIKDTFLR                              | 1159.3             | 2            | 2.4512 | 0.2837 |
| HEILQWVLQTDSQQ                         | 1725.9             | 2            | 2.5612 | 0.2881 |
| HEIVQTLSLKDGLIPLEIR                    | 2175.6             | 2            | 5.2887 | 0.4869 |
| HELAEIVFK                              | 1086.3             | 2            | 2.8402 | 0.2291 |
| HELELPHLTSALHPVHPDIK                   | 2284.6             | 2            | 2.607  | 0.1795 |
| HELLQPFNVLYEK                          | 1630.9             | 2            | 4.0727 | 0.3772 |
| HELLQPFNVLYEKEGEFVAQFK                 | 2667.0             | 3            | 4.7151 | 0.3796 |

| Peptide Sequence                          | Peptide mass (m/z) | Charge State | Xcorr  | DelCn2 |
|-------------------------------------------|--------------------|--------------|--------|--------|
| HELQANCYEEVKDR                            | 1734.9             | 3            | 5.6117 | 0.4883 |
| HEMLPASLIQAQR                             | 1494.7             | 2            | 3.4096 | 0.4616 |
| HEMLPEFYK                                 | 1194.4             | 2            | 2.8181 | 0.2846 |
| HEMPPHYAISESAYR                           | 1902.1             | 3            | 3.5621 | 0.3537 |
| HEMPPHYAITDTAYR                           | 1916.1             | 2            | 5.1275 | 0.4296 |
| HEQEYMEVR                                 | 1221.3             | 2            | 2.7051 | 0.2453 |
| HEQILVLDPPTDLK                            | 1618.9             | 2            | 4.6206 | 0.4119 |
| HEQILVLDPPTDLKFKGPFTDVVTTNLK              | 3167.6             | 3            | 5.2176 | 0.4197 |
| HEQNIDCGGGYVK                             | 1420.5             | 2            | 4.362  | 0.3931 |
| HESENYLSIACDKPQQVR                        | 2118.3             | 3            | 4.684  | 0.3626 |
| HESGASIK                                  | 828.9              | 1            | 2.0953 | 0.1737 |
| HESGASIKIDEPLEGSEDR                       | 2070.2             | 2            | 5.1211 | 0.4978 |
| HESGASIKIDEPLEGSEDRITITGTQDQIQNAQYLLQNSVK | 4642.1             | 3            | 5.7974 | 0.4978 |
| HESQMDSVVK                                | 1160.3             | 2            | 2.7837 | 0.3782 |
| HETLTSLNLEK                               | 1285.4             | 2            | 2.7617 | 0.2393 |
| HETLTSLNLEKK                              | 1413.6             | 2            | 3.315  | 0.3475 |
| HETWSGHVISS                               | 1240.3             | 2            | 2.5311 | 0.2877 |
| HEVEKSEISENTDASGK                         | 1860.9             | 3            | 4.2434 | 0.3503 |
| HEVGYYVLGQLQHEAAVPQLAAALAR                | 2643.0             | 3            | 3.6273 | 0.4303 |
| HEVININLK                                 | 1080.3             | 2            | 2.7263 | 0.2781 |
| HEVLLISAEQDKR                             | 1538.7             | 3            | 4.3119 | 0.381  |
| HEVPPHYAVTEGAYR                           | 1826.0             | 3            | 4.6879 | 0.4021 |
| HEYGSPGILEFFHHQLK                         | 2040.3             | 3            | 3.2864 | 0.277  |
| HFAAHEREDLVQQLER                          | 1979.1             | 2            | 2.647  | 0.1403 |
| HFAESETLDQLPLTNPEHFGTPVIGKK               | 3007.3             | 3            | 4.3965 | 0.2706 |
| HFAGDVLGYVTPWNSHGYDVTK                    | 2464.7             | 3            | 3.4893 | 0.1566 |
| HFCPNVPIILVGNKK                           | 1680.1             | 3            | 4.2776 | 0.2824 |
| HFDETVNR                                  | 1018.1             | 2            | 3.0598 | 0.2183 |
| HFDETVNRYK                                | 1309.4             | 2            | 2.6116 | 0.1955 |
| HFEANNGKLPDNK                             | 1484.6             | 2            | 3.6618 | 0.28   |
| HFEANNGKLPDNKVIASELGSMPELK                | 2840.2             | 3            | 3.2054 | 0.1618 |
| HFEDLEFQQLEHESR                           | 1945.0             | 2            | 3.2929 | 0.271  |
| HFELGGDK                                  | 903.0              | 2            | 2.531  | 0.1769 |
| HFELGGDKK                                 | 1031.1             | 2            | 2.8464 | 0.1543 |
| HFESQSDDPHFHEK                            | 1740.8             | 2            | 3.8044 | 0.3342 |
| HFFLYGEFPGDER                             | 1614.7             | 2            | 2.7435 | 0.1929 |

| Peptide Sequence         | Peptide mass (m/z) | Charge State | Xcorr  | DelCn2 |
|--------------------------|--------------------|--------------|--------|--------|
| HFGEKAPAPQPPSLPDRSPRPQR  | 2566.9             | 3            | 3.2199 | 0.2007 |
| HFGKAPGTPHSHTKPYVR       | 2018.3             | 3            | 3.3145 | 0.2873 |
| HFHGTSLTFSMQDGPEAGQTVK   | 2376.6             | 3            | 5.2863 | 0.2812 |
| HFHPLFEYFDYESR           | 1888.0             | 3            | 3.3457 | 0.2426 |
| HFHVPDQGINIYR            | 1596.8             | 2            | 3.3152 | 0.2859 |
| HFIDVGAGVIDEDYR          | 1706.8             | 2            | 4.5216 | 0.4455 |
| HFLDFQGSAIPQAMQK         | 1819.1             | 2            | 3.7116 | 0.2334 |
| HFLIETGPR                | 1070.2             | 2            | 2.5039 | 0.1391 |
| HFLLEEDKPEEPTAHAFVSTLTR  | 2668.9             | 3            | 5.7778 | 0.4068 |
| HFLPEMLSK                | 1102.3             | 2            | 2.4298 | 0.175  |
| HFNALGGWGELQNSVK         | 1757.9             | 2            | 4.3806 | 0.4021 |
| HFNAPSHIR                | 1079.2             | 2            | 2.6065 | 0.2358 |
| HFNLLSSK                 | 946.1              | 2            | 2.4062 | 0.2395 |
| HFNSMSGPATLRK            | 1446.7             | 2            | 3.6635 | 0.2958 |
| HFPSVNWLISYSK            | 1578.8             | 2            | 3.2031 | 0.1975 |
| HFRPELEER                | 1213.3             | 2            | 2.7993 | 0.1669 |
| HFSEHPSTSK               | 1157.2             | 2            | 2.9397 | 0.284  |
| HFSGLEEAVYR              | 1308.4             | 1            | 3.2353 | 0.3485 |
| HFSPEELKVK               | 1214.4             | 2            | 2.8008 | 0.2299 |
| HFSQGSALILHQR            | 1494.7             | 2            | 3.642  | 0.3426 |
| HFSSDAVPHPR              | 1250.3             | 2            | 2.9846 | 0.4871 |
| HFSVEGQLEFR              | 1349.5             | 2            | 3.3573 | 0.4762 |
| HFSVTAEGGLSPAQVTGAR      | 1886.1             | 2            | 6.6315 | 0.5057 |
| HFTEDIQTR                | 1147.2             | 2            | 2.6168 | 0.184  |
| HFTILDAPGHK              | 1236.4             | 3            | 3.4051 | 0.2993 |
| HFTQALSTVTPR             | 1358.5             | 2            | 3.4723 | 0.2876 |
| HFTQPHAQDFLR             | 1497.6             | 3            | 3.722  | 0.3181 |
| HFVALSTNTTK              | 1219.4             | 2            | 3.4804 | 0.3072 |
| HFVDSHHQKPVNAIIIEHVR     | 2264.5             | 3            | 4.3175 | 0.2799 |
| HFVGMLPEKDCR             | 1432.7             | 2            | 2.7693 | 0.1683 |
| HFVGYPTNSDFELK           | 1654.8             | 2            | 3.8041 | 0.4233 |
| HFVTISSPLATQIPQAVGAAYAAK | 2442.8             | 3            | 4.1556 | 0.3319 |
| HFYQPIWTLVGAGAK          | 1689.0             | 2            | 5.0174 | 0.4178 |
| HFYVVIPQIYK              | 1407.7             | 2            | 3.2324 | 0.2899 |
| HFYWYLTNEGIIQYLR         | 2004.2             | 2            | 4.6306 | 0.4669 |
| HGAEVIDTPVFELK           | 1555.8             | 2            | 3.7694 | 0.3675 |

| Peptide Sequence                 | Peptide mass (m/z) | Charge State | Xcorr  | DelCn2 |
|----------------------------------|--------------------|--------------|--------|--------|
| HGAEVIDTPVFELKETLMGK             | 2215.6             | 3            | 4.431  | 0.3237 |
| HGAGAEISTVHPEQYAK                | 1795.9             | 2            | 5.2377 | 0.4415 |
| HGAGAEISTVHPEQYAKR               | 1952.1             | 2            | 4.9223 | 0.3986 |
| HGAGAEISTVNPEQYSKR               | 1945.1             | 2            | 5.2151 | 0.3891 |
| HGAPSPSHPI SAPQAAAAAALR          | 2079.3             | 3            | 4.6239 | 0.43   |
| HGAPSPSHPI SAPQAAAAAALRR         | 2235.5             | 3            | 3.333  | 0.4815 |
| HGASPELQK                        | 967.1              | 2            | 3.308  | 0.2441 |
| HGATHVFASK                       | 1055.2             | 2            | 3.2659 | 0.1972 |
| HGATHVFASK ESEITDEDIDGILER       | 2770.9             | 3            | 4.522  | 0.2894 |
| HGAVCHT GAPDATLHTVHPDSVSSSYSSR   | 2978.2             | 3            | 5.5271 | 0.4837 |
| HGDDLRR                          | 868.9              | 2            | 2.6604 | 0.1997 |
| HGDEIYIAPSGVQK                   | 1514.7             | 2            | 4.5816 | 0.4583 |
| HGDEIYIAPSGVQKER                 | 1800.0             | 3            | 4.6545 | 0.4113 |
| HGDGTTLDIMLK                     | 1301.5             | 2            | 3.6788 | 0.2381 |
| HGDL PDIQIK                      | 1136.3             | 2            | 3.2509 | 0.2119 |
| HGDLTHFVANNLQLK                  | 1707.9             | 2            | 4.4967 | 0.3333 |
| HGDPGDAAQQEAK                    | 1324.3             | 2            | 4.2695 | 0.4384 |
| HGDQHEGQHYNISPDLETVPFHGLPPR      | 3207.4             | 3            | 5.963  | 0.4986 |
| HGDSAMHLALR                      | 1208.4             | 2            | 3.1999 | 0.3978 |
| HGEAQVK                          | 768.8              | 1            | 2.0053 | 0.1893 |
| HGEEGVEAEKK                      | 1213.3             | 2            | 3.4295 | 0.2803 |
| HGEEVTPEDVLSAAMY PDVFAHFK        | 2691.0             | 3            | 5.3785 | 0.4362 |
| HGEGGHYHYD TTPDIVEYLG YFLPAEFLYR | 3561.9             | 3            | 3.2475 | 0.1338 |
| HGEIDYEAIK                       | 1274.4             | 2            | 3.5939 | 0.2696 |
| HGEISFLNEEVK                     | 1402.5             | 2            | 2.5486 | 0.1455 |
| HGENEHNLQGR                      | 1291.3             | 2            | 3.3069 | 0.4053 |
| HGENIIDTLGAEVDRLEK               | 2010.2             | 3            | 6.3197 | 0.4276 |
| HGERDVEVER                       | 1226.3             | 2            | 2.7293 | 0.3088 |
| HGESAWNLENR                      | 1313.4             | 2            | 3.7002 | 0.4384 |
| HGESEFNLLGK                      | 1231.3             | 2            | 4.0106 | 0.3975 |
| HGESGSM AVFHQTQG PSYSESK         | 2352.5             | 3            | 4.7831 | 0.4134 |
| HGEVCPAGWKPGSDTIKPDVQK           | 2350.6             | 3            | 3.3124 | 0.2219 |
| HGFEAASIKEER                     | 1374.5             | 2            | 3.9814 | 0.4105 |
| HGFEAASIKEERGDEVMVELAENGKK       | 2875.2             | 3            | 5.3915 | 0.4002 |
| HGFFVNPSDSVA VIAANIFSIPYFQQTGVR  | 3283.7             | 3            | 4.0445 | 0.257  |
| HGFLEEFITPIVK                    | 1530.8             | 2            | 4.1886 | 0.2338 |

| Peptide Sequence                  | Peptide mass (m/z) | Charge State | Xcorr  | DelCn2 |
|-----------------------------------|--------------------|--------------|--------|--------|
| HGFPYQPSALAFDPVQK                 | 1903.1             | 3            | 4.9092 | 0.3635 |
| HGFRQEYLDLTYR                     | 1698.9             | 2            | 2.7297 | 0.2406 |
| HGFSDNQK                          | 933.0              | 2            | 2.7293 | 0.3237 |
| HGGGPPPEPR                        | 1001.1             | 2            | 2.4817 | 0.2672 |
| HGGGTESLFFDKVR                    | 1550.7             | 2            | 3.0036 | 0.2924 |
| HGGLALQPGPPGLHPFFHPSLGPLER        | 2827.2             | 3            | 4.8677 | 0.3096 |
| HGGLSLVQTTDDFFYPLVEDPYMMGR        | 2875.3             | 3            | 4.1385 | 0.2086 |
| HGGNYLLFNLSEK                     | 1520.7             | 2            | 3.8907 | 0.4432 |
| HGGNYVPAPK                        | 1040.2             | 2            | 2.4187 | 0.2055 |
| HGGPKDEER                         | 1025.1             | 2            | 3.3927 | 0.3409 |
| HGGPLPYHR                         | 1034.2             | 2            | 2.9193 | 0.2662 |
| HGGTIPIVPTAEFQDR                  | 1738.9             | 2            | 4.3709 | 0.4492 |
| HGGYKPSDEHKTDLNPDLQGGDDLDPNYVLSSR | 3755.9             | 3            | 6.5211 | 0.489  |
| HGHVDTLK                          | 907.0              | 2            | 2.7668 | 0.236  |
| HGHYPNTIAEK                       | 1267.4             | 2            | 2.476  | 0.2793 |
| HGIEFSVISSEV                      | 1391.5             | 2            | 3.1156 | 0.206  |
| HGIILNSEIATNGETSDDLNNVGYQGPTK     | 3045.3             | 3            | 3.7119 | 0.314  |
| HGITQANELVNLTEFFVNHILPDLK         | 2864.2             | 3            | 3.284  | 0.1184 |
| HGIVEDWDLMER                      | 1500.7             | 2            | 3.7631 | 0.2314 |
| HGKAPILIATDVASR                   | 1549.8             | 2            | 4.1216 | 0.383  |
| HGKELGGESNFGDALLDAGESMK           | 2363.5             | 3            | 4.9493 | 0.4249 |
| HGKELGGESNFGDALLDAGESMKR          | 2519.7             | 3            | 4.4445 | 0.3846 |
| HGKNPVMELNEK                      | 1396.6             | 2            | 4.6236 | 0.3038 |
| HGKYMACCLLYRGDVVPK                | 2054.5             | 2            | 2.7721 | 0.1704 |
| HGLAHDEMCK                        | 1038.2             | 2            | 2.7818 | 0.181  |
| HGLANLTAELLQQGANPNLQTEALPLPK      | 3082.5             | 3            | 4.4368 | 0.3675 |
| HGLANSISSYLIKPVQR                 | 1884.2             | 2            | 3.4136 | 0.3273 |
| HGLEAISIMDSR                      | 1329.5             | 2            | 3.3647 | 0.3534 |
| HGLEKPISFVK                       | 1255.5             | 2            | 3.239  | 0.317  |
| HGLEQYLSR                         | 1103.2             | 2            | 2.6942 | 0.1891 |
| HGLEVIYMIPIDEYCVQQLKEFEGK         | 3112.6             | 3            | 6.169  | 0.4459 |
| HGLGYSLLER                        | 1145.3             | 2            | 2.693  | 0.2939 |
| HGLINAGYR                         | 1001.1             | 2            | 2.4007 | 0.1392 |
| HGLLLPASPVR                       | 1160.4             | 2            | 3.1302 | 0.2143 |
| HGLLVPNNTTDQELQHIR                | 2086.3             | 3            | 5.3258 | 0.4786 |
| HGLPLVTLTLPKSRK                   | 1532.9             | 2            | 3.0369 | 0.313  |

| Peptide Sequence       | Peptide mass (m/z) | Charge State | Xcorr  | DelCn2 |
|------------------------|--------------------|--------------|--------|--------|
| HGLPPSETIAIVEHINAK     | 1927.2             | 3            | 4.5388 | 0.4502 |
| HGLQHEGIFR             | 1194.3             | 2            | 2.9214 | 0.2957 |
| HGLQSLGK               | 840.0              | 2            | 2.8819 | 0.2783 |
| HGLTEADVGITK           | 1241.4             | 2            | 2.7289 | 0.1771 |
| HGLTTTTPQQK            | 1111.2             | 2            | 2.9293 | 0.2244 |
| HGLVPFAFVR             | 1143.4             | 2            | 2.9751 | 0.2236 |
| HGLYLPTR               | 957.1              | 2            | 2.6217 | 0.3556 |
| HGNQYIQVNEPWKR         | 1769.9             | 3            | 5.2752 | 0.4207 |
| HGNRGETGPSGPVGPAGAVGPR | 2028.2             | 3            | 6.0823 | 0.4679 |
| HGNVASLVQR             | 1081.2             | 2            | 3.2799 | 0.3127 |
| HGPATGPQGVPEVR         | 1402.5             | 2            | 2.9031 | 0.2955 |
| HGPINVNHYASK           | 1337.5             | 2            | 3.0579 | 0.3414 |
| HGQALGELAEQLEQAR       | 1750.9             | 2            | 4.8586 | 0.4262 |
| HGQALGELAEQLEQARR      | 1907.1             | 3            | 4.3846 | 0.3746 |
| HGQTP TTLPR            | 1108.2             | 2            | 2.4278 | 0.1254 |
| HGRPGIGATHSSR          | 1333.4             | 3            | 3.5707 | 0.1532 |
| HGSFLVR                | 815.9              | 2            | 2.5114 | 0.2309 |
| HGSGAFYSPELLEALTLR     | 1962.2             | 2            | 3.4287 | 0.3279 |
| HSGGTQYVSTR            | 1193.3             | 2            | 2.9137 | 0.2165 |
| HGSIIYHPSILPR          | 1490.7             | 2            | 4.2846 | 0.421  |
| HGSIIYHPSLLPR          | 1490.7             | 2            | 4.4952 | 0.3722 |
| HGSLGFLPR              | 984.1              | 2            | 3.4617 | 0.3995 |
| HGSNIEAMSK             | 1074.2             | 2            | 3.3118 | 0.3936 |
| HGSSEDYLH MVHR         | 1568.7             | 3            | 3.2096 | 0.2333 |
| HGSSKPTDGTK            | 1115.2             | 2            | 2.4108 | 0.2331 |
| HGSVSADEAAR            | 1100.1             | 2            | 3.287  | 0.4151 |
| HGSYEDAVHSGALND        | 1572.6             | 2            | 4.6301 | 0.4606 |
| HGTEEQKATYLPQLTTEK     | 2075.3             | 3            | 4.3565 | 0.4142 |
| HGVEAK                 | 640.7              | 1            | 1.7397 | 0.1308 |
| HGVEAKNYEEIAKVEK       | 1845.0             | 3            | 4.8328 | 0.4192 |
| HGVFLVR                | 828.0              | 2            | 2.5359 | 0.2156 |
| HGVIVAADSR             | 1025.1             | 2            | 3.1649 | 0.1632 |
| HGVSHK VDDSSGSIGR      | 1638.7             | 2            | 5.1249 | 0.4916 |
| HGVVPLATYMR            | 1244.5             | 2            | 3.1271 | 0.2554 |
| HGVYNPNK               | 929.0              | 2            | 3.2257 | 0.3124 |
| HGVYNPNKIFGVTTLDIVR    | 2144.5             | 2            | 5.832  | 0.5742 |



| Peptide Sequence                                | Peptide mass (m/z) | Charge State | Xcorr  | DelCn2 |
|-------------------------------------------------|--------------------|--------------|--------|--------|
| HGWEELVYYTVPLIQEMESR                            | 2480.8             | 2            | 3.6423 | 0.3499 |
| HGYEKPTPIQTQAIPAIMSGR                           | 2296.6             | 3            | 3.9874 | 0.2943 |
| HGYIGEFEIIDDHRAGK                               | 1958.1             | 2            | 2.5934 | 0.1538 |
| HHAAYVNNLNVTEEK                                 | 1739.9             | 2            | 5.3689 | 0.5013 |
| HHAAYVNNLNVTEEKYQEALAK                          | 2543.8             | 2            | 7.2695 | 0.4836 |
| HHAAYVNNLNVTEEKYQEALAKGDVTAQIALQPALK            | 3950.4             | 3            | 6.6365 | 0.547  |
| HHEEEIVHHKKEIER                                 | 1951.1             | 3            | 3.7395 | 0.212  |
| HHEGFTNWSPVSWNWNSK                              | 2311.5             | 3            | 5.282  | 0.2871 |
| HHGDVMDLQFFDQER                                 | 1875.0             | 2            | 2.7078 | 0.1465 |
| HHGPISTTPGIIPQK                                 | 1583.8             | 2            | 2.7389 | 0.121  |
| HHGPQTLYLPLVTLSSIPVFQR                          | 2391.8             | 2            | 4.886  | 0.4659 |
| HHGQEGSILVTKVEEPSK                              | 1976.2             | 3            | 4.2876 | 0.2624 |
| HHHENFVGYQDDNLFQDEMR                            | 2532.6             | 3            | 3.7146 | 0.365  |
| HHIETGGGQLPAK                                   | 1345.5             | 2            | 2.5285 | 0.1855 |
| HHISIAEIYETELVDIEK                              | 2140.4             | 2            | 5.1637 | 0.4147 |
| HHLDLGHNSQAYEALTQIPDSSR                         | 2590.7             | 3            | 3.4944 | 0.1945 |
| HHLENEKTQLIQQVEQLKQEVSR                         | 2816.1             | 3            | 3.9216 | 0.2661 |
| HHLGAATPENPEIELLR                               | 1898.1             | 2            | 4.344  | 0.379  |
| HHLGDDVVLFTTDGAHK                               | 1863.0             | 2            | 4.954  | 0.3814 |
| HHLGHLLSVPDESSALEDR                             | 2113.3             | 2            | 3.3663 | 0.2705 |
| HHLQPPEGPPDAR                                   | 1451.6             | 2            | 3.4677 | 0.2787 |
| HHNQSTAINLNNPESQSMHLETR                         | 2659.8             | 2            | 6.0595 | 0.4468 |
| HHPDFEVFVFDVGQK                                 | 1802.0             | 3            | 3.5274 | 0.2784 |
| HHPEDVEPALRK                                    | 1428.6             | 2            | 2.4894 | 0.1077 |
| HHSDGSVSLSGHLQPPPVTTEQHGAR                      | 2732.9             | 3            | 4.8212 | 0.4339 |
| HHSLGGQYGVQGFPTIK                               | 1827.0             | 2            | 4.7187 | 0.4236 |
| HHTAAFEER                                       | 1098.2             | 2            | 2.6344 | 0.2653 |
| HHVLGTITTDK                                     | 1222.4             | 2            | 3.1497 | 0.2501 |
| HHVLQNDVLAHQSTVEAVNK                            | 2240.5             | 3            | 4.1056 | 0.2943 |
| HHVPSDFNVNVK                                    | 1393.5             | 3            | 3.3055 | 0.1089 |
| HHVTLRQQISGPELLSR                               | 1972.2             | 2            | 2.4734 | 0.1299 |
| HHYEQQQEDLAR                                    | 1554.6             | 2            | 3.535  | 0.3588 |
| HHYESLQTAK                                      | 1214.3             | 2            | 2.4587 | 0.201  |
| HIADLAGNSEVILPVPAFNVINGGSHAGNK                  | 3013.4             | 3            | 7.3043 | 0.5397 |
| HIADLAGNSEVILPVPAFNVINGGSHAGNKLAMQEFMILPVGAANFR | 4903.6             | 3            | 5.5233 | 0.5237 |
| HIAEDADR                                        | 927.0              | 2            | 2.6196 | 0.2056 |

| Peptide Sequence               | Peptide mass (m/z) | Charge State | Xcorr  | DelCn2 |
|--------------------------------|--------------------|--------------|--------|--------|
| HIAEDADRKYEEVAR                | 1802.9             | 2            | 3.7203 | 0.4045 |
| HIAEDSDRKYEEVAR                | 1818.9             | 2            | 2.755  | 0.1217 |
| HIAEEADR                       | 941.0              | 1            | 2.9602 | 0.2486 |
| HIAEEADRK                      | 1069.2             | 2            | 2.4402 | 0.1663 |
| HIAEEADRKYEEVAR                | 1817.0             | 2            | 3.8576 | 0.3801 |
| HIAEEADRKYEEVARK               | 1945.1             | 2            | 3.3642 | 0.222  |
| HIAEVSQEVTR                    | 1269.4             | 2            | 3.3642 | 0.3224 |
| HIANYISGIQTIGHR                | 1680.9             | 2            | 3.7905 | 0.5097 |
| HIAQLAGNSDLILPVPAFNVINGGSHAGNK | 3026.4             | 3            | 6.6555 | 0.5172 |
| HIAQTSK                        | 784.9              | 1            | 2.34   | 0.1035 |
| HIAVLQAEVYGAR                  | 1427.6             | 2            | 3.5664 | 0.4299 |
| HIDALEDKIDEEVRR                | 1839.0             | 3            | 3.5384 | 0.2997 |
| HIDCAAIYGNPEIGEALKEDVGPGK      | 2727.0             | 3            | 3.2808 | 0.1067 |
| HIDFSLR                        | 888.0              | 2            | 2.5753 | 0.2058 |
| HIDLVEGDEGR                    | 1240.3             | 2            | 3.7554 | 0.3569 |
| HIDSAHLYNNEEQVGLAIR            | 2180.4             | 3            | 6.171  | 0.5954 |
| HIDYFNNQIIVDLVEQQHK            | 2354.6             | 3            | 6.4813 | 0.4567 |
| HIEEENLIDEDFQNLK               | 1987.1             | 2            | 6.1781 | 0.4608 |
| HIEEENLIDEDFQNLKLR             | 2256.5             | 2            | 4.7574 | 0.4486 |
| HIEEGLGR                       | 911.0              | 2            | 2.5876 | 0.1692 |
| HIEHMEDELGLQK                  | 1666.8             | 2            | 3.3401 | 0.3108 |
| HIEIFTDLSSR                    | 1318.5             | 2            | 3.2802 | 0.2374 |
| HIEVQVAQETR                    | 1310.4             | 2            | 3.1252 | 0.2165 |
| HIEWESVLNTAGCLR                | 1830.1             | 2            | 4.2884 | 0.4189 |
| HIFALFNTEQR                    | 1376.5             | 2            | 3.7898 | 0.3484 |
| HIFDHVIGPEGVLAGK               | 1689.9             | 2            | 3.0014 | 0.2306 |
| HIGFVYHPTK                     | 1199.4             | 2            | 2.6579 | 0.3359 |
| HIGKPLLGGPFSLTHTHTGER          | 2119.4             | 3            | 4.863  | 0.4622 |
| HIGLVYSGMGPDYR                 | 1565.8             | 3            | 4.3179 | 0.4658 |
| HIHITQATETTTTR                 | 1610.8             | 2            | 4.1289 | 0.3378 |
| HIHSQVTVQINSAEQEIK             | 2062.3             | 3            | 4.5114 | 0.3025 |
| HIENAKQDVDDEYGVSQALAR          | 2472.7             | 2            | 4.267  | 0.3717 |
| HIILVLSGK                      | 980.2              | 2            | 2.5133 | 0.2632 |
| HIITTTTR                       | 842.0              | 1            | 1.74   | 0.1159 |
| HIITVDGKPPTWSEFPK              | 1953.2             | 2            | 3.1822 | 0.2424 |
| HIKENDYYTPTGEFR                | 1871.0             | 2            | 4.4656 | 0.2982 |

| Peptide Sequence                       | Peptide mass (m/z) | Charge State | Xcorr  | DelCn2 |
|----------------------------------------|--------------------|--------------|--------|--------|
| HILGFDTGDAVLNEAAQILR                   | 2154.4             | 2            | 5.5778 | 0.5108 |
| HILGSIVQSEGSYVESLKR                    | 2103.4             | 3            | 5.3668 | 0.5181 |
| HILLAVANDEELNQLLK                      | 1934.2             | 3            | 5.988  | 0.4721 |
| HILLAVANDEELNQLLLKGVTIASGGVLPNIHPELLAK | 3902.5             | 3            | 8.5364 | 0.5943 |
| HILLAVANDEELNQLLLKGVTIASGGVLPR         | 3042.5             | 3            | 7.2993 | 0.5479 |
| HILQFVAIK                              | 1069.3             | 2            | 2.934  | 0.1804 |
| HILQFVAIKR                             | 1225.5             | 2            | 2.9414 | 0.2061 |
| HIMGQNVADYMR                           | 1435.7             | 2            | 4.1516 | 0.3399 |
| HINMDGTINVDDFK                         | 1619.8             | 2            | 3.1402 | 0.3623 |
| HINSIKSVFGGLVNYFK                      | 1924.2             | 2            | 2.534  | 0.1602 |
| HIPDEIFLLTAEQIAQEVSEQHLSQGR            | 3090.4             | 3            | 3.6299 | 0.2627 |
| HIQDAPEEFISELAEYLIKPLNK                | 2699.1             | 3            | 5.7887 | 0.4845 |
| HIQEHYGGTATFYLSQAADGAK                 | 2366.5             | 3            | 4.7326 | 0.3741 |
| HIQHDTIGYLLTR                          | 1567.8             | 2            | 3.0026 | 0.2343 |
| HISDLYEDLRDGHNLISLLEVLSGDSLPR          | 3278.6             | 3            | 4.9527 | 0.4154 |
| HISDLYEDLRDGHNLISLLEVLSGDSLPREK        | 3535.9             | 3            | 3.4969 | 0.1761 |
| HISESHEKGENVK                          | 1494.6             | 2            | 3.8382 | 0.3172 |
| HISSETLKR                              | 1214.4             | 2            | 2.8896 | 0.3217 |
| HISPQAK                                | 780.9              | 1            | 2.1012 | 0.1148 |
| HISPSAKPFENGQYLDIYGITR                 | 2507.8             | 3            | 3.9819 | 0.3237 |
| HISQISVAEDDDESLLGHLMIK                 | 2607.9             | 3            | 7.6991 | 0.5168 |
| HISQISVAEDDDESLLGHLMIKGGK              | 2736.1             | 3            | 8.2924 | 0.5494 |
| HISVLAETIKK                            | 1239.5             | 2            | 2.6071 | 0.1658 |
| HITDSGLAAR                             | 1041.1             | 2            | 2.7271 | 0.34   |
| HITESVNSIR                             | 1156.3             | 2            | 2.4244 | 0.2249 |
| HITGSYK                                | 805.9              | 1            | 2.1888 | 0.341  |
| HITIFSPEGR                             | 1157.3             | 2            | 3.0509 | 0.3819 |
| HITLIFNPTK                             | 1212.4             | 2            | 2.8067 | 0.2804 |
| HITTPREPLPIVTFQLIPK                    | 2298.8             | 3            | 3.4936 | 0.2657 |
| HIVAVLPEIDPVLFGQK                      | 1876.2             | 2            | 3.8729 | 0.3731 |
| HIVLSGGSTMYPGLPSR                      | 1773.0             | 2            | 5.1816 | 0.4957 |
| HIVNHAVVNEDPNAR                        | 1685.8             | 2            | 4.518  | 0.4139 |
| HIYDTK                                 | 776.9              | 1            | 1.9025 | 0.1356 |
| HIYYITGETK                             | 1225.4             | 2            | 3.4322 | 0.3634 |
| HIYYITGETKDQVANSFAVER                  | 2442.7             | 3            | 6.4603 | 0.5855 |
| HKAGFLDLKDFLPK                         | 1629.9             | 2            | 3.7298 | 0.3786 |

| Peptide Sequence                    | Peptide mass (m/z) | Charge State | Xcorr  | DelCn2 |
|-------------------------------------|--------------------|--------------|--------|--------|
| HKALEEDIENHATDVHQAVK                | 2285.5             | 3            | 3.4993 | 0.1903 |
| HKASVEDADTQSK                       | 1416.5             | 2            | 4.2491 | 0.3238 |
| HKASVEDADTQSKVHQLYETIQR             | 2684.9             | 3            | 5.7548 | 0.4786 |
| HKDAAIYLVTSLASK                     | 1617.9             | 3            | 4.8001 | 0.5108 |
| HKDIIDDLVK                          | 1196.4             | 2            | 3.4897 | 0.2867 |
| HKDLQQQLVDAK                        | 1423.6             | 2            | 3.9021 | 0.4132 |
| HKDSMDELFSHR                        | 1502.6             | 2            | 3.6274 | 0.4485 |
| HKDVAEEIANRPTLDTLHEQASALPQEHAESPDVR | 4069.4             | 3            | 5.2423 | 0.5109 |
| HKEALIISNTK                         | 1254.5             | 2            | 3.2781 | 0.3503 |
| HKEAVTILSQQR                        | 1410.6             | 2            | 3.7147 | 0.4467 |
| HKEDLQPYK                           | 1158.3             | 2            | 2.8138 | 0.2752 |
| HKEDTLAFSEWGSPHA                    | 1812.9             | 2            | 5.0913 | 0.4438 |
| HKEDTLAFSEWGSPHAAVPR                | 2236.4             | 2            | 7.1164 | 0.6271 |
| HKEDVYENLHTK                        | 1513.6             | 2            | 4.274  | 0.3823 |
| HKELAPYDENWFYTR                     | 1970.1             | 3            | 5.1587 | 0.5276 |
| HKELFALHPSPDEEEPIER                 | 2274.5             | 3            | 5.274  | 0.4848 |
| HKELFDELVKK                         | 1386.6             | 3            | 3.3339 | 0.3182 |
| HKELQKEYEILLQSYENVSNEAER            | 2951.2             | 3            | 3.9477 | 0.1158 |
| HKELSVLLLEMK                        | 1440.8             | 2            | 3.9607 | 0.3404 |
| HKEVEAAQGK                          | 1196.3             | 2            | 3.0404 | 0.2512 |
| HKFPDEDSYQK                         | 1394.5             | 2            | 2.7945 | 0.1716 |
| HKGPPVFTQEER                        | 1425.6             | 2            | 2.6386 | 0.1579 |
| HKGSPFPEVAESVQQELESYR               | 2418.6             | 3            | 5.2214 | 0.4306 |
| HKIISIFSGTEK                        | 1360.6             | 2            | 3.5349 | 0.2621 |
| HKIPVMALVGNDAGWTQISR                | 2194.5             | 2            | 5.4367 | 0.5068 |
| HKLANPPPMVEGGLASR                   | 1904.2             | 3            | 3.5091 | 0.3491 |
| HKLDVTSVEDYK                        | 1434.6             | 2            | 3.7906 | 0.418  |
| HKLDVTSVEDYKALQK                    | 1875.1             | 3            | 5.1524 | 0.3896 |
| HKLTLESYQAVCDR                      | 1777.0             | 2            | 2.5067 | 0.1377 |
| HKLVS DGQALPEMIEHLQTNAEK            | 2589.9             | 3            | 6.8913 | 0.4649 |
| HKMTIAALESK                         | 1229.5             | 2            | 3.1958 | 0.3465 |
| HKNVIQLVDVLYNEEK                    | 1942.2             | 2            | 2.4358 | 0.2773 |
| HKPAFTEEDVLNIFPVVK                  | 2084.4             | 2            | 3.931  | 0.374  |
| HKPDFISLFK                          | 1232.5             | 2            | 2.7104 | 0.291  |
| HKPGIVQETTFDLGGDIHSGTALPTSK         | 2808.1             | 3            | 5.4045 | 0.3857 |
| HKPQVSQQEELK                        | 1451.6             | 2            | 2.6394 | 0.1268 |

| Peptide Sequence            | Peptide mass (m/z) | Charge State | Xcorr  | DelCn2 |
|-----------------------------|--------------------|--------------|--------|--------|
| HKQEFLDKPEDVLLK             | 1840.1             | 3            | 4.9809 | 0.4628 |
| HKQELTEKDATIASLEETNR        | 2314.5             | 3            | 4.6262 | 0.412  |
| HKQPALTADFNYYFER            | 2100.3             | 3            | 4.5318 | 0.3746 |
| HKQSLEEAAK                  | 1141.3             | 2            | 2.9008 | 0.3029 |
| HKSDFGK                     | 818.9              | 2            | 2.7472 | 0.1404 |
| HKSDVEIPATVTAFSFEDDTVPLSPLK | 2945.3             | 3            | 4.5255 | 0.4359 |
| HKSEFFEK                    | 1052.2             | 2            | 2.5233 | 0.1188 |
| HKSETDTSILR                 | 1287.4             | 2            | 3.4679 | 0.3749 |
| HKTELESLK                   | 1085.2             | 2            | 2.7116 | 0.2055 |
| HKTTIFTDAK                  | 1162.3             | 2            | 2.6257 | 0.2916 |
| HKTVALDGTFLFQK              | 1458.7             | 2            | 4.0375 | 0.3477 |
| HKVISGTTGLGYLSPK            | 1601.9             | 2            | 3.5025 | 0.3016 |
| HKVNEHEQDGNELQTTPEFR        | 2409.5             | 3            | 4.7645 | 0.3304 |
| HKWEAAHVAEQLR               | 1575.8             | 3            | 3.5748 | 0.4193 |
| HKYNFIADVVEK                | 1463.7             | 2            | 2.7541 | 0.1677 |
| HLAAALENLNK                 | 1194.4             | 2            | 2.5348 | 0.2078 |
| HLAAVEER                    | 925.0              | 2            | 2.8566 | 0.2374 |
| HLADHGQLSGIQR               | 1432.6             | 2            | 3.7749 | 0.4566 |
| HLAEEYGER                   | 1104.2             | 2            | 2.495  | 0.1291 |
| HLAEHSPYYEAMK               | 1576.8             | 2            | 2.5291 | 0.2364 |
| HLAELNHQK                   | 1090.2             | 2            | 2.7612 | 0.2055 |
| HLAGEVAK                    | 824.9              | 1            | 2.181  | 0.1644 |
| HLAGLGLTEAIDK               | 1338.5             | 2            | 2.8789 | 0.3223 |
| HLAGLGLTEAIDKNK             | 1580.8             | 2            | 5.2357 | 0.489  |
| HLAGLGLTEAIDKNKADLSR        | 2123.4             | 2            | 6.4841 | 0.4849 |
| HLAILGAGLMGAGIAQVSVDKGLK    | 2320.8             | 2            | 4.6539 | 0.4496 |
| HLAISNMPLVK                 | 1223.5             | 2            | 2.7577 | 0.1852 |
| HLALNLQEK                   | 1066.2             | 2            | 2.5817 | 0.1251 |
| HLANMMGEDPETFTQEDIDR        | 2350.5             | 2            | 4.4206 | 0.4021 |
| HLAPDYR                     | 872.0              | 2            | 2.4602 | 0.2057 |
| HLAPPGLHPVPGGVFPVPPAAVVLMK  | 2599.2             | 3            | 3.3167 | 0.116  |
| HLAPPPLLSPLLPSIKPTVR        | 2147.6             | 3            | 3.6653 | 0.3121 |
| HLAQVGDSMDR                 | 1229.3             | 2            | 3.3765 | 0.1632 |
| HLASDAIINENYDYLKGFLEDLAPPER | 3105.4             | 3            | 4.0269 | 0.3568 |
| HLATHFNLLIGAEAQHQK          | 2029.3             | 2            | 3.0784 | 0.1638 |
| HLAVMPHPER                  | 1187.4             | 2            | 2.8225 | 0.3229 |

| Peptide Sequence            | Peptide mass (m/z) | Charge State | Xcorr  | DelCn2 |
|-----------------------------|--------------------|--------------|--------|--------|
| HLDFLKQPLATQK               | 1539.8             | 2            | 4.7962 | 0.3912 |
| HLDFLKQPLATQKDLTGQVPTPVVK   | 2775.2             | 3            | 4.8462 | 0.4151 |
| HLDHVAALFPGDVDR             | 1662.8             | 2            | 4.9494 | 0.4737 |
| HLDHVAALFPGDVDRLR           | 1932.2             | 3            | 3.6874 | 0.3155 |
| HLDSLNVAGYK                 | 1217.4             | 2            | 3.5253 | 0.2828 |
| HLDQIIPR                    | 992.2              | 2            | 2.508  | 0.2167 |
| HLDRVDAVLVTHPGADSLPGLNSLLR  | 2767.1             | 3            | 5.1348 | 0.4439 |
| HLDRVDSILLTHIGDDNLPGINSMLQR | 3044.4             | 3            | 5.4988 | 0.3752 |
| HLDSVLSDHTR                 | 1280.4             | 3            | 3.4131 | 0.3422 |
| HLDTLHNFVSR                 | 1339.5             | 2            | 2.885  | 0.2588 |
| HLEAAALLSER                 | 1210.4             | 2            | 2.5334 | 0.2839 |
| HLEEAFTSEHWLVR              | 1754.9             | 2            | 3.0424 | 0.2728 |
| HLEEEEEER                   | 1071.1             | 2            | 3.0071 | 0.1062 |
| HLEEEKER                    | 1070.1             | 2            | 2.6851 | 0.1016 |
| HLEEEENR                    | 927.0              | 2            | 2.5601 | 0.1561 |
| HLEEIVEK                    | 997.1              | 1            | 2.4853 | 0.1584 |
| HLEEKDLKPIFEQFGR            | 1987.2             | 2            | 3.6224 | 0.2143 |
| HLEELDKSHLEGELRPK           | 2031.3             | 3            | 4.4105 | 0.3237 |
| HLEEPGETQNAFLNER            | 1885.0             | 2            | 4.9823 | 0.396  |
| HLEFLGQLR                   | 1113.3             | 2            | 2.5822 | 0.2526 |
| HLEFMNQLK                   | 1160.4             | 2            | 2.5324 | 0.252  |
| HLEFSDQYR                   | 1332.4             | 2            | 3.0057 | 0.3261 |
| HLEFSDQYRELQR               | 1859.0             | 2            | 3.2287 | 0.176  |
| HLEIIYAINQR                 | 1370.6             | 2            | 3.5674 | 0.2757 |
| HLEINPDHPIVETLR             | 1784.0             | 3            | 4.5955 | 0.4437 |
| HLEINPDHSIIETLR             | 1788.0             | 2            | 5.0065 | 0.497  |
| HLEINPDHSIIETLRQK           | 2044.3             | 3            | 3.9464 | 0.2697 |
| HLELGKK                     | 825.0              | 1            | 2.1768 | 0.1005 |
| HLENGKETLQR                 | 1325.5             | 2            | 3.5249 | 0.366  |
| HLEQRDEPQEPSNKVPEQQR        | 2445.6             | 3            | 4.758  | 0.1879 |
| HLETFEHPNVVR                | 1478.6             | 2            | 3.4692 | 0.3067 |
| HLFAQVLDINQADAGTLPLDSSQKVR  | 2838.2             | 3            | 4.0317 | 0.3253 |
| HLFEKELAGQSR                | 1415.6             | 2            | 3.7361 | 0.3113 |
| HLFKDHAYALAVSSTK            | 1789.0             | 2            | 4.431  | 0.448  |
| HLGGHEGTIPSKV               | 1332.5             | 2            | 3.1044 | 0.3643 |
| HLGIVDAFQQGK                | 1313.5             | 2            | 3.2717 | 0.3668 |

| Peptide Sequence               | Peptide mass (m/z) | Charge State | Xcorr  | DelCn2 |
|--------------------------------|--------------------|--------------|--------|--------|
| HLGNAIK                        | 752.9              | 1            | 1.8696 | 0.1407 |
| HLGQIENYLQTSSLLASDHHLTEER      | 3022.2             | 3            | 4.9882 | 0.4171 |
| HLGSPATSVPGMGLHPPGPPLARPILPR   | 2824.3             | 3            | 4.6521 | 0.4219 |
| HLGTLNFGGIR                    | 1185.4             | 2            | 2.6954 | 0.3067 |
| HLHAILGPMLLNRPLDGVTNSLPSPEQLK  | 3162.7             | 3            | 3.8319 | 0.1706 |
| HLHESLLQQQLQDSVQNLDGHVR        | 2567.8             | 3            | 4.0606 | 0.4631 |
| HLHFVDVDDLHIIVQELR             | 2199.5             | 2            | 2.7945 | 0.1203 |
| HLHPIQTSFQEATASK               | 1796.0             | 2            | 3.2532 | 0.3779 |
| HLHTLIFNAAR                    | 1293.5             | 2            | 2.7019 | 0.3067 |
| HLIATQLLSNLEDIMR               | 1868.2             | 2            | 3.2066 | 0.3208 |
| HLIEMGYLQGGK                   | 1346.6             | 2            | 2.7548 | 0.2652 |
| HLIIFNFIPEEK                   | 1595.9             | 2            | 3.8514 | 0.3021 |
| HLIKAEKPAAAA                   | 1449.8             | 2            | 2.4957 | 0.1908 |
| HLILPEKYPPPTTELLDLQPLPVSAALR   | 2951.5             | 3            | 4.6639 | 0.4627 |
| HLIPAANTGESK                   | 1238.4             | 2            | 2.645  | 0.1087 |
| HLIPMNPNDDSLAK                 | 1641.9             | 2            | 3.5248 | 0.2564 |
| HLISTHFAPGDFQGFALVNPQR         | 2453.7             | 3            | 5.7507 | 0.4528 |
| HLITTQTEHK                     | 1208.3             | 2            | 2.7409 | 0.1248 |
| HLIVLINK                       | 950.2              | 2            | 2.7634 | 0.1097 |
| HLKAEVDAEKPGATDR               | 1737.9             | 2            | 4.3871 | 0.4554 |
| HLKEETIQIITK                   | 1453.7             | 2            | 3.2948 | 0.3171 |
| HLKEGGLLTLGAK                  | 1408.7             | 2            | 4.2461 | 0.3264 |
| HLKLFGEPTIYYPK                 | 1870.2             | 3            | 3.525  | 0.2899 |
| HLKQTKPEFDQVLQGTAASTK          | 2328.6             | 3            | 4.3451 | 0.2782 |
| HLLDDNGQDKPVKPPTK              | 1903.1             | 2            | 4.71   | 0.3678 |
| HLLDDNGQDKPVKPPTKK             | 2031.3             | 3            | 3.481  | 0.3146 |
| HLLETPGQYLVIYNGDLVEYDADHMAQLQR | 3390.7             | 3            | 6.7984 | 0.4135 |
| HLLFQSHMATK                    | 1313.6             | 2            | 2.6939 | 0.2782 |
| HLLGVEDLLQK                    | 1265.5             | 2            | 3.2298 | 0.2539 |
| HLLIGVSSDR                     | 1097.3             | 2            | 3.0669 | 0.3116 |
| HLLNQAVGEEVPEK                 | 1563.7             | 2            | 2.6278 | 0.2735 |
| HLLQAPLDDAQEILQAR              | 1932.2             | 3            | 4.7308 | 0.2651 |
| HLLQAPVDDAQEILHSR              | 1943.2             | 3            | 5.3381 | 0.5146 |
| HLLSQPLFTESQK                  | 1528.7             | 2            | 3.634  | 0.2802 |
| HLLVHAPEDKK                    | 1287.5             | 2            | 3.4118 | 0.3412 |
| HLLVSNVGGDGEEIER               | 1724.9             | 2            | 3.2062 | 0.2022 |

| Peptide Sequence                                   | Peptide mass (m/z) | Charge State | Xcorr  | DelCn2 |
|----------------------------------------------------|--------------------|--------------|--------|--------|
| HLLYGRPAVL <sup>Y</sup> R                          | 1458.7             | 2            | 3.1879 | 0.3422 |
| HLMHLELDISDSK                                      | 1538.8             | 2            | 3.0157 | 0.2021 |
| HLMLPDFDLLEDIESK                                   | 1916.2             | 2            | 5.8851 | 0.4522 |
| HLNATVNNLQAK                                       | 1323.5             | 2            | 3.6583 | 0.3502 |
| HLNDDDV <sup>T</sup> GSVK                          | 1300.4             | 2            | 2.7653 | 0.2269 |
| HLNDDVVK                                           | 940.0              | 2            | 2.8132 | 0.1554 |
| HLNDDVVKIDFEDVIAEPEGTHSFDGIWK                      | 3327.6             | 3            | 4.9463 | 0.3406 |
| HLNDETT <sup>S</sup> K                             | 1045.1             | 1            | 2.5955 | 0.3822 |
| HLNDETT <sup>S</sup> KQIK                          | 1414.5             | 2            | 3.5267 | 0.259  |
| HLNDPNS <sup>N</sup> PK                            | 1136.2             | 2            | 2.553  | 0.2257 |
| HLNEIDLFHCIDPNSK                                   | 2011.2             | 2            | 4.2715 | 0.4406 |
| HLNFLTSEQALADFAELIK                                | 2161.4             | 2            | 6.5134 | 0.507  |
| HLNLAENSSYIHVYR                                    | 1817.0             | 2            | 2.6858 | 0.1736 |
| HLNLEYHSSMIADAVK                                   | 1829.1             | 2            | 3.7989 | 0.4741 |
| HLNLEYHSSMIADAVKK                                  | 1957.2             | 2            | 4.6356 | 0.4502 |
| HLNQEVAVR                                          | 1066.2             | 2            | 2.8938 | 0.1815 |
| HLNRPTLDDSS <sup>E</sup> EEHAIEITTQEITQLFHR        | 3561.8             | 3            | 4.67   | 0.3295 |
| HLNYTEFTQLQELQLEHAR                                | 2518.8             | 3            | 5.5345 | 0.3947 |
| HLPASIVEFQPTLR                                     | 1608.9             | 2            | 2.4324 | 0.1375 |
| HLPNLQTHKENPVL <sup>D</sup> VVSNPEQTAGEER          | 3153.4             | 3            | 5.0049 | 0.4236 |
| HLPSTEPDPHVVR                                      | 1484.6             | 2            | 2.5113 | 0.1664 |
| HLQDLFAPLVVR                                       | 1408.7             | 2            | 3.2889 | 0.2871 |
| HLQDLMEGLTAK                                       | 1356.6             | 2            | 2.9272 | 0.2389 |
| HLQDL <sup>S</sup> GR                              | 926.0              | 1            | 1.9799 | 0.1368 |
| HLQENTQSHMR                                        | 1381.5             | 2            | 2.854  | 0.2238 |
| HLQFIPVPPR                                         | 1303.6             | 2            | 2.4104 | 0.2019 |
| HLQIEIEGLIDQMIDK                                   | 1896.2             | 2            | 3.6967 | 0.2926 |
| HLQINQTFEELR                                       | 1528.7             | 2            | 3.0594 | 0.2944 |
| HLQKFPTEGLSSVVR                                    | 1698.9             | 3            | 3.9437 | 0.3478 |
| HLQLAIR                                            | 851.0              | 2            | 2.4521 | 0.1096 |
| HLQLAIRGDEELDSL <sup>I</sup> K                     | 1951.2             | 2            | 4.1177 | 0.4785 |
| HLQLAIRGDEELDSL <sup>I</sup> KATIAGGGVIPHIHK       | 3303.8             | 3            | 5.7448 | 0.4754 |
| HLQLAIRNDEELNK                                     | 1693.9             | 2            | 4.7872 | 0.4041 |
| HLQLAIRNDEELNKLLGGVTIAQGGVLPNIQAVLLPK              | 3947.6             | 3            | 5.8935 | 0.4818 |
| HLQLAIRNDEELNKLLGK                                 | 2105.4             | 3            | 5.3203 | 0.4299 |
| HLQLAIRNDEELNKLLGKV <sup>T</sup> IAQGGVLPNIQAVLLPK | 4018.7             | 3            | 3.8045 | 0.182  |



| Peptide Sequence                     | Peptide mass (m/z) | Charge State | Xcorr  | DelCn2 |
|--------------------------------------|--------------------|--------------|--------|--------|
| HLQLAIRNDEELNKLGRVTIAQGGVLPNIQAVLLPK | 4046.8             | 3            | 4.2223 | 0.3295 |
| HLQLAVR                              | 837.0              | 1            | 2.7082 | 0.1644 |
| HLQLAVRNDEELNK                       | 1679.9             | 2            | 3.8153 | 0.2245 |
| HLQLAVRNDEELNKLGGVTIAQGGVLPNIQAVLLPK | 3933.6             | 3            | 5.489  | 0.4368 |
| HLQLKEESVK                           | 1211.4             | 2            | 2.756  | 0.2217 |
| HLQLKEQK                             | 1024.2             | 2            | 2.4754 | 0.1122 |
| HLQLQTQLEQLQEETFRLEAAKDDYR           | 3204.5             | 3            | 4.0781 | 0.2581 |
| HLQLSFQEPHFYLR                       | 1816.1             | 2            | 4.8046 | 0.3573 |
| HLQPGMVLTVPEPGIYFIDHLLDEALADPAR      | 3332.8             | 3            | 6.8524 | 0.5259 |
| HLQTGENHTSVDPR                       | 1591.7             | 2            | 3.5727 | 0.3851 |
| HLQTYGEHYPLDHFDDK                    | 2001.1             | 3            | 4.3507 | 0.3726 |
| HLQVIFGHLAASR                        | 1449.7             | 3            | 4.1115 | 0.4839 |
| HLQVNVTPNPVQCSSLHGK                  | 1875.1             | 2            | 4.4903 | 0.4619 |
| HLRDEGLR                             | 996.1              | 2            | 2.7218 | 0.2524 |
| HLRDQADFSVLHYAGK                     | 1858.0             | 3            | 5.1256 | 0.3908 |
| HLREEEEEEGEKHR                       | 1678.7             | 2            | 4.1363 | 0.3997 |
| HLREYQDLLNVK                         | 1528.7             | 3            | 5.2124 | 0.3098 |
| HLREYQELLNVK                         | 1542.8             | 2            | 2.7946 | 0.1849 |
| HLSASQK                              | 770.9              | 1            | 2.4265 | 0.1966 |
| HLSDHLSSELVEQTLSDLEQSK               | 2409.6             | 2            | 6.2321 | 0.4358 |
| HLSDSINQK                            | 1042.1             | 2            | 2.4874 | 0.1033 |
| HLSDSINQKHFEQAIER                    | 2053.2             | 2            | 5.0436 | 0.4784 |
| HLSIAQEQGDKVGEAR                     | 1738.9             | 2            | 2.908  | 0.2025 |
| HLSIILEKDQLIQEAAAENNK                | 2378.7             | 2            | 5.0033 | 0.39   |
| HLSIILEKDQLIQEAAAENNKLEEIR           | 3147.6             | 3            | 5.7838 | 0.4973 |
| HLSLLTTLNLR                          | 1255.4             | 2            | 3.388  | 0.3563 |
| HLSPYATLTVGDSSHK                     | 1713.9             | 2            | 4.3527 | 0.464  |
| HLSQSSLLLEHLLSSWEQIPK                | 2446.8             | 3            | 5.2689 | 0.3477 |
| HLSSGDLLRDNMLR                       | 1627.9             | 2            | 3.5772 | 0.3703 |
| HLSSLTDNEQADIFER                     | 1876.0             | 2            | 4.0438 | 0.4042 |
| HLSTFSHQVLQTR                        | 1554.7             | 2            | 4.1221 | 0.4218 |
| HLSVNDLPVGR                          | 1207.4             | 2            | 2.9928 | 0.3398 |
| HLSVVTAAK                            | 1039.3             | 2            | 2.527  | 0.2164 |
| HLTDAYFK                             | 995.1              | 2            | 2.8322 | 0.1882 |
| HLTDAYFKK                            | 1123.3             | 2            | 2.9517 | 0.2763 |
| HLTDTSHGVR                           | 1123.2             | 2            | 2.4951 | 0.2315 |

| Peptide Sequence              | Peptide mass (m/z) | Charge State | Xcorr  | DelCn2 |
|-------------------------------|--------------------|--------------|--------|--------|
| HLTGEFEKK                     | 1089.2             | 2            | 2.4935 | 0.2476 |
| HLTHENVQR                     | 1134.2             | 2            | 2.5996 | 0.2487 |
| HLTVEELFGTSLPK                | 1571.8             | 2            | 3.3725 | 0.2221 |
| HLTYAEFTQFLLEIQLEHAK          | 2432.8             | 3            | 3.9262 | 0.2656 |
| HLTYENVER                     | 1161.2             | 2            | 2.527  | 0.2479 |
| HLVAGGGAGAVSR                 | 1152.3             | 2            | 3.4453 | 0.2441 |
| HLVDPIDDLFLAAK                | 1567.8             | 2            | 3.0899 | 0.2495 |
| HLVESTNEMAPLKVWQLQDLSFQTAAR   | 3114.5             | 3            | 5.7523 | 0.4414 |
| HLVFNPSHR                     | 1107.2             | 2            | 2.6206 | 0.2365 |
| HLVFPILLEFLSVK                | 1542.9             | 2            | 3.461  | 0.2802 |
| HLVGGERDPMNLFAGDVDGGINAK      | 2730.1             | 3            | 5.0618 | 0.4103 |
| HLVGLWTADNATATNLLKR           | 2095.4             | 3            | 3.887  | 0.3635 |
| HLVGVDSLIGPETQIGEK            | 1893.1             | 2            | 5.485  | 0.3793 |
| HLVLLDTAQAAAAGHR              | 1644.9             | 2            | 5.6782 | 0.4949 |
| HLVMGDIPAAVNAFQEAASLLGK       | 2353.7             | 3            | 4.8068 | 0.4834 |
| HLVMGDIPAAVNAFQEAASLLGKK      | 2481.9             | 3            | 4.5162 | 0.4638 |
| HLVPGAPFLLQALVR               | 1632.0             | 3            | 4.5009 | 0.216  |
| HLVSAGYVHVNR                  | 1352.5             | 2            | 3.5535 | 0.3502 |
| HLVSPEALDLLDKLLR              | 1833.2             | 3            | 4.3524 | 0.4195 |
| HLVYESDKNKDEK                 | 1605.7             | 2            | 5.0021 | 0.3332 |
| HLVYESDQNKDGK                 | 1533.6             | 2            | 4.2481 | 0.4014 |
| HLWDYTFGPEK                   | 1393.5             | 2            | 2.949  | 0.2879 |
| HLYDFVGNIR                    | 1234.4             | 2            | 2.4308 | 0.2212 |
| HLYDTGETKDIHLEMESLVNSR        | 2588.8             | 3            | 4.2482 | 0.3331 |
| HLYHSSQNELAK                  | 1427.5             | 2            | 2.8994 | 0.2866 |
| HLYTKDIDIHEVR                 | 1639.8             | 3            | 4.7304 | 0.4654 |
| HMDGGQIDGQEITATAVLAPWPRPPPR   | 2912.3             | 3            | 4.4498 | 0.3918 |
| HMEASLQELK                    | 1186.4             | 2            | 2.7965 | 0.3151 |
| HMEASLQELKASPR                | 1597.8             | 3            | 3.7088 | 0.3267 |
| HMGIGK                        | 642.8              | 1            | 1.9601 | 0.1639 |
| HMGLFDHAAR                    | 1155.3             | 2            | 2.6424 | 0.2965 |
| HMGVMAGDIYSVFR                | 1583.9             | 2            | 4.0807 | 0.4777 |
| HMLEEEGTLDLLGLKR              | 1855.1             | 2            | 2.8714 | 0.2268 |
| HMMAFIEQEANEK                 | 1578.8             | 2            | 4.279  | 0.4533 |
| HMMAFIEQEANEKAAEIDAK          | 2335.6             | 2            | 5.791  | 0.418  |
| HMMAFIEQEANEKAAEIDAKAEFEFNIEK | 3425.7             | 3            | 7.1066 | 0.5142 |

| Peptide Sequence          | Peptide mass (m/z) | Charge State | Xcorr  | DelCn2 |
|---------------------------|--------------------|--------------|--------|--------|
| HMNLILCDCDEFK             | 1738.0             | 2            | 3.0726 | 0.1163 |
| HMNSAGVLATLR              | 1270.5             | 2            | 3.5669 | 0.4324 |
| HMQANPEPPKKNNDK           | 1748.9             | 2            | 3.5491 | 0.335  |
| HMQEWLETR                 | 1230.4             | 2            | 2.6036 | 0.2185 |
| HMQFPPMYEENSR             | 1666.9             | 2            | 3.4146 | 0.2867 |
| HMVFLGGAVLADIMK           | 1603.0             | 2            | 4.6952 | 0.5047 |
| HMYHSLYLK                 | 1192.4             | 2            | 2.8616 | 0.3371 |
| HMYVFGDFKDVLPK            | 1867.2             | 3            | 5.5566 | 0.495  |
| HMYVFGDFKDVLPKGLK         | 2108.5             | 3            | 3.6262 | 0.1267 |
| HNAEVAAFHLDR              | 1380.5             | 2            | 2.552  | 0.2962 |
| HNAQQQGNGLR               | 1152.2             | 2            | 3.0476 | 0.2994 |
| HNEETGDNVGPLIK            | 1636.8             | 2            | 5.1891 | 0.3276 |
| HNEETGDNVGPLIKK           | 1765.0             | 3            | 5.4277 | 0.2819 |
| HNEFDFIGTR                | 1323.4             | 2            | 3.6716 | 0.3583 |
| HNEFNPQHSLLVQFR           | 1867.1             | 2            | 3.9515 | 0.2679 |
| HNELTGDNVGPLIK            | 1620.8             | 2            | 4.358  | 0.4532 |
| HNESVVKEMLELAK            | 1627.9             | 2            | 4.5644 | 0.4392 |
| HNFLQAHNGQGLR             | 1492.6             | 2            | 3.9369 | 0.3681 |
| HNFALFGDVK                | 1245.4             | 2            | 2.8667 | 0.2945 |
| HNGPNDASDGTVR             | 1340.3             | 2            | 3.4966 | 0.3514 |
| HNGTGGKSIYGEKFEDENFILK    | 2484.7             | 3            | 4.8419 | 0.3203 |
| HNHDLSSYQDTIQLENELR       | 2441.6             | 3            | 3.5209 | 0.2207 |
| HNIAGTTHSGAEK             | 1323.4             | 2            | 4.1478 | 0.3304 |
| HNIAYFPQIVSVAAR           | 1686.9             | 2            | 4.8383 | 0.3718 |
| HNIICLQNDHK               | 1335.5             | 3            | 4.8181 | 0.2659 |
| HNIMDFAMPYFIQVMK          | 1986.4             | 2            | 4.2669 | 0.4453 |
| HNIQFSSFDFISDEEVR         | 2071.2             | 2            | 4.7327 | 0.4529 |
| HNIRHTEKKPFK              | 1535.8             | 2            | 2.5703 | 0.1934 |
| HNKEFLSMANR               | 1460.7             | 2            | 3.3785 | 0.2943 |
| HNKPEVEVR                 | 1108.2             | 2            | 3.1338 | 0.324  |
| HNKTTAQVLIR               | 1281.5             | 2            | 2.5122 | 0.2516 |
| HNLEQDLVREELNKR           | 1894.1             | 2            | 2.9952 | 0.1492 |
| HNLITEMVALNPDKPPADYKPPATR | 2937.4             | 3            | 6.0371 | 0.4585 |
| HNLLRPETVESLFYLYR         | 2151.5             | 3            | 4.2982 | 0.3865 |
| HNLQDFINIK                | 1242.4             | 2            | 3.8025 | 0.2433 |
| HNLYSSESEDR               | 1337.3             | 2            | 2.6215 | 0.3077 |

| Peptide Sequence                   | Peptide mass (m/z) | Charge State | Xcorr  | DelCn2 |
|------------------------------------|--------------------|--------------|--------|--------|
| HNNLDLVIIR                         | 1207.4             | 2            | 3.0841 | 0.3114 |
| HNNLDLVIREQTEGEYSSLEHESAR          | 3041.2             | 3            | 4.0391 | 0.244  |
| HNPTGAVLFMGQINKP                   | 1725.0             | 2            | 2.4637 | 0.1567 |
| HNPTVTGHQEQTYLQK                   | 1882.0             | 2            | 4.6425 | 0.4879 |
| HNQLPLVIEFTEQTAPK                  | 1966.2             | 3            | 5.2525 | 0.4479 |
| HNSEKPPEPVKPEVK                    | 1715.9             | 2            | 3.7462 | 0.2825 |
| HNSFADFLQAHLHTADLER                | 2223.4             | 2            | 3.6717 | 0.3698 |
| HNSSGSILFLGR                       | 1288.4             | 2            | 3.5313 | 0.4198 |
| HNSTTSSTSSGGYR                     | 1442.4             | 2            | 2.8881 | 0.2987 |
| HNSTTSSTSSGGYRR                    | 1598.6             | 2            | 2.9169 | 0.2028 |
| HNTALLAATDLLK                      | 1381.6             | 2            | 3.0346 | 0.3599 |
| HNTALLAATDLLKR                     | 1537.8             | 3            | 5.147  | 0.4205 |
| HNTEDFTLFTLDDVDAAFDKIQQLK          | 2926.2             | 3            | 5.8143 | 0.4228 |
| HNTPEDAK                           | 911.9              | 2            | 3.0505 | 0.2569 |
| HNVMI STEWAAPNVLR                  | 1839.1             | 2            | 4.6958 | 0.384  |
| HNYELDEAVTLQR                      | 1588.7             | 2            | 4.6568 | 0.4544 |
| HNYELGGPMTLQR                      | 1516.7             | 2            | 3.9321 | 0.3536 |
| HNYGVGESFTVQR                      | 1494.6             | 2            | 3.5935 | 0.442  |
| HNYGVVESFTVQR                      | 1536.7             | 2            | 3.7226 | 0.3545 |
| HPDASVNFSEFSKK                     | 1593.7             | 2            | 4.3555 | 0.3505 |
| HPDFLPYDHAR                        | 1368.5             | 3            | 3.2108 | 0.2731 |
| HPDSHQLFIGNLPHEVDK                 | 2084.3             | 2            | 3.1869 | 0.2898 |
| HPDSHQLFIGNLPHEVDKSELK             | 2541.8             | 3            | 5.0678 | 0.418  |
| HPDSHQLFIGNLPHEVDKSELKDFQSYGNVVELR | 4097.5             | 3            | 5.1729 | 0.414  |
| HPDVEVDGFSELR                      | 1500.6             | 2            | 2.5461 | 0.1083 |
| HPDYSVLLLLR                        | 1312.5             | 2            | 2.8301 | 0.2898 |
| HPEAEMAQNSVR                       | 1369.5             | 2            | 2.6263 | 0.1376 |
| HPELADK                            | 809.9              | 1            | 2.2701 | 0.1396 |
| HPELADKNV PNLHVMK                  | 1843.1             | 2            | 3.9052 | 0.397  |
| HPFFLDDRR                          | 1203.3             | 2            | 2.5337 | 0.1856 |
| HPFLLLGTTANR                       | 1340.6             | 2            | 2.5974 | 0.2082 |
| HPGAHQGNLASGLHSNAIASPGSPSLGR       | 2691.9             | 3            | 3.7788 | 0.3388 |
| HPGHYAVYNLSPR                      | 1511.7             | 2            | 2.8515 | 0.3362 |
| HPGSFDVVHVK                        | 1222.4             | 3            | 4.1888 | 0.3278 |
| HPGSFDVVHVKDANGNSFATR              | 2256.4             | 2            | 3.4441 | 0.4091 |
| HPHDIIDDINSGAVECPAS                | 1991.1             | 2            | 4.5556 | 0.3752 |

| Peptide Sequence               | Peptide mass (m/z) | Charge State | Xcorr  | DelCn2 |
|--------------------------------|--------------------|--------------|--------|--------|
| HPLLHIQK                       | 986.2              | 1            | 2.3353 | 0.2259 |
| HPLQNR                         | 764.9              | 1            | 1.7716 | 0.2031 |
| HPNVHFVLNQESMTLTGLPNHLAK       | 2699.1             | 3            | 4.0308 | 0.3288 |
| HPPAPAEPSSDLASK                | 1504.6             | 2            | 3.2494 | 0.3139 |
| HPQAHVDIYEK                    | 1337.5             | 2            | 2.4804 | 0.2081 |
| HPQELLASADFQPVPSIVGVNNEFGWLIPK | 3418.8             | 3            | 3.8194 | 0.1646 |
| HPSHSTTPSGPGDEVAR              | 1732.8             | 2            | 5.0009 | 0.3777 |
| HPSSPPVVDTVHGK                 | 1457.6             | 3            | 5.3338 | 0.4522 |
| HPTPLALGHFHTVTLLR              | 1911.2             | 3            | 3.3113 | 0.3377 |
| HPVISESEVFQQFLNFR              | 2078.3             | 2            | 3.9973 | 0.3988 |
| HPVLLHPLGGWTK                  | 1568.9             | 2            | 3.8959 | 0.3515 |
| HPVSCKDTPGFIVNR                | 1670.9             | 2            | 3.9037 | 0.4065 |
| HPVSLEQYLMEGSYNK               | 1896.1             | 2            | 3.7009 | 0.4635 |
| HPWDDISYVLPEHMSM               | 1958.2             | 2            | 3.8279 | 0.3162 |
| HPWIVHWDQLPQYQLNR              | 2231.5             | 3            | 3.2834 | 0.1805 |
| HPYFYAPELLFFAK                 | 1744.0             | 3            | 4.2838 | 0.3266 |
| HPYFYAPELLFFAKR                | 1900.2             | 3            | 3.9222 | 0.3517 |
| HQAFEAEELHANADR                | 1609.7             | 2            | 4.7967 | 0.4656 |
| HQAFMAELASNKEWLKIEK            | 2389.7             | 2            | 4.5759 | 0.3884 |
| HQALQAEIAGHEPR                 | 1557.7             | 2            | 4.9635 | 0.4942 |
| HQAQIDHYLGLANK                 | 1608.8             | 2            | 5.1029 | 0.4804 |
| HQAQIDQYLGLVR                  | 1541.7             | 2            | 3.3593 | 0.3526 |
| HQASINELKR                     | 1196.3             | 2            | 3.2679 | 0.341  |
| HQASISELKR                     | 1169.3             | 2            | 2.7146 | 0.2489 |
| HQAVQLPR                       | 949.1              | 2            | 2.5232 | 0.2197 |
| HQAVQLPREGQEDQGLTKDFSNSPLHR    | 3089.3             | 3            | 4.4843 | 0.3168 |
| HQDDLQDVIGR                    | 1296.4             | 2            | 3.1634 | 0.3857 |
| HQDLQFAGLLNPLDSPHMR            | 2327.6             | 3            | 4.9946 | 0.1986 |
| HQDVATR                        | 826.9              | 2            | 2.7201 | 0.1587 |
| HQDVFSSAQRLDPVYFVAPAK          | 2376.7             | 3            | 3.3779 | 0.2846 |
| HQDVPSQDDSKPTQR                | 1738.8             | 2            | 4.3399 | 0.3882 |
| HQEAEMAQNAVR                   | 1384.5             | 2            | 3.5971 | 0.2822 |
| HQEGEIFDTEK                    | 1333.4             | 2            | 2.5987 | 0.3035 |
| HQEGEIFDTEKEK                  | 1590.7             | 2            | 4.0071 | 0.3844 |
| HQEGEIFDTEKEKEYEITEQR          | 2510.7             | 3            | 5.6595 | 0.477  |
| HQEGEIFDTEKEKEYEITEQRK         | 2638.8             | 3            | 3.704  | 0.1092 |

| Peptide Sequence            | Peptide mass (m/z) | Charge State | Xcorr  | DelCn2 |
|-----------------------------|--------------------|--------------|--------|--------|
| HQEHILR                     | 933.0              | 1            | 1.6865 | 0.1312 |
| HQEHKGEIDAHEDSFK            | 1908.0             | 2            | 4.268  | 0.3795 |
| HQELETLKDLYNQDDNHQELGSFHIR  | 3181.4             | 3            | 4.8019 | 0.3757 |
| HQEQHHPELEDK                | 1527.6             | 2            | 4.5562 | 0.336  |
| HQEQHHPELEDKDLDFK           | 2146.3             | 3            | 3.2579 | 0.2256 |
| HQEQHHPELEDKDLDFKNK         | 2388.5             | 3            | 4.4579 | 0.2861 |
| HQEYLNLSILQHAK              | 1581.8             | 3            | 4.2918 | 0.3011 |
| HQFGQEKDVFAPR               | 1559.7             | 2            | 3.5343 | 0.3661 |
| HQFGTDKDVFGPR               | 1504.6             | 2            | 3.0932 | 0.236  |
| HQGAEELLDEESR               | 1513.5             | 2            | 3.2711 | 0.2541 |
| HQGALYSLFPDHHVK             | 1750.0             | 2            | 3.9248 | 0.4128 |
| HQGMTVGMGQK                 | 1174.4             | 2            | 2.7666 | 0.129  |
| HQGV MVGMGQK                | 1172.4             | 1            | 3.4515 | 0.4405 |
| HQGV MVGMGQKDCYVGDEAQS      | 2368.7             | 2            | 3.9182 | 0.3778 |
| HQGV MVGMGQKDCYVGDEAQS      | 2524.8             | 3            | 3.5587 | 0.301  |
| HQGV MVGMGQKDSYVGDEAQS      | 2352.6             | 2            | 6.429  | 0.5744 |
| HQGV MVGMGQKDSYVGDEAQS      | 2508.8             | 3            | 5.3051 | 0.5178 |
| HQGV MVSMGQKDSYVGDEAQS      | 2382.6             | 3            | 4.6896 | 0.3682 |
| HQGV MVSMGQKDSYVGDEAQS      | 2538.8             | 3            | 5.4644 | 0.4163 |
| HQILEQAVEDYAETVHQLSK        | 2339.5             | 3            | 7.1114 | 0.5555 |
| HQITYLIHQAK                 | 1352.6             | 2            | 3.287  | 0.3265 |
| HQIVEVAGDDKYGR              | 1587.7             | 2            | 5.1628 | 0.4872 |
| HQIVEVAGDDKYGRK             | 1715.9             | 2            | 5.4747 | 0.4401 |
| HQKIIEEAPAPGIK              | 1531.8             | 2            | 2.5051 | 0.1905 |
| HQKVVEIAPAAHLDPQLR          | 2023.3             | 3            | 3.5285 | 0.2196 |
| HQLILPAFEHEYR               | 1653.9             | 3            | 4.6163 | 0.3764 |
| HQLVVSSPPRPVR               | 1472.7             | 2            | 2.6765 | 0.1412 |
| HQNLKEFALTNPEK              | 1669.9             | 2            | 4.3807 | 0.3674 |
| HQNLLKELQDLALQGAK           | 1920.2             | 2            | 6.0462 | 0.4767 |
| HQNLLKELQDLALQGAKE          | 2049.3             | 2            | 4.8252 | 0.3745 |
| HQNLLKELQDLALQGAKE          | 2205.5             | 3            | 4.4248 | 0.4496 |
| HQNQNTIQELLQNCSDCLMR        | 2389.7             | 2            | 3.6711 | 0.2073 |
| HQNVQLPR                    | 992.1              | 2            | 3.2369 | 0.2281 |
| HQNVQLPREGQEDQGLTK          | 2078.2             | 2            | 2.8894 | 0.1442 |
| HQNVQLPREGQEDQGLTKDYGNSPLHR | 3118.3             | 3            | 4.8062 | 0.3329 |
| HQPADLLEFALQHFTR            | 1924.2             | 3            | 4.8214 | 0.4433 |

| Peptide Sequence                  | Peptide mass (m/z) | Charge State | Xcorr  | DelCn2 |
|-----------------------------------|--------------------|--------------|--------|--------|
| HQPQEFPTYVEPTNDEICEAFRK           | 2780.0             | 3            | 3.5998 | 0.3011 |
| HQPTAIIAK                         | 979.2              | 1            | 2.5681 | 0.1505 |
| HQPTLKTDATTAIIK                   | 1638.9             | 2            | 3.3314 | 0.3951 |
| HQQALEVVNNNEEKAK                  | 1852.0             | 3            | 3.8111 | 0.2042 |
| HQQELLEHQR                        | 1318.4             | 2            | 3.3909 | 0.2814 |
| HQQISGR                           | 825.9              | 2            | 2.4392 | 0.1065 |
| HQQLLEEKNILAEQLQAETELFAEAEEMR     | 3442.8             | 3            | 4.4085 | 0.2142 |
| HQQLSDLHK                         | 1106.2             | 2            | 2.706  | 0.1992 |
| HQQLSGLHK                         | 1048.2             | 2            | 2.7942 | 0.147  |
| HQQTVTIPPKSSLSVPYVIVPLKTGLQEVEVK  | 3517.1             | 3            | 4.6097 | 0.4334 |
| HQQVPHILQGLLSPR                   | 1724.0             | 2            | 3.2534 | 0.4134 |
| HQSDGNEIAHTR                      | 1365.4             | 2            | 2.5739 | 0.1634 |
| HQSFGAAVLSR                       | 1173.3             | 2            | 2.5822 | 0.3575 |
| HQSFLVGETGSGK                     | 1446.6             | 2            | 4.0191 | 0.3056 |
| HQTLQGLAFPLQPEAQR                 | 1935.2             | 2            | 4.955  | 0.5091 |
| HQTLQGVAFPISR                     | 1454.7             | 2            | 3.4162 | 0.3983 |
| HQTNISELKR                        | 1226.4             | 2            | 3.3701 | 0.3399 |
| HQTVQLPR                          | 979.1              | 2            | 2.4057 | 0.1822 |
| HQVEQLSSSLK                       | 1256.4             | 2            | 3.1307 | 0.2973 |
| HQVLFIADEIQTGLAR                  | 1812.1             | 2            | 4.4954 | 0.4266 |
| HQVQLLGR                          | 951.1              | 2            | 2.5795 | 0.2069 |
| HRADHPPAEVTSHAASGAK               | 1940.1             | 3            | 3.2819 | 0.1698 |
| HRAEAPPLEREDSGTFSLGK              | 2198.4             | 3            | 3.2318 | 0.1693 |
| HRDFVAEPMGEKPVGSLAGIGEVLGK        | 2695.1             | 3            | 6.9279 | 0.4649 |
| HRDGGEALVSPDGTVTEAPR              | 2065.2             | 3            | 4.5247 | 0.4698 |
| HRDILQDYTHEFHK                    | 1840.0             | 3            | 4.3206 | 0.2834 |
| HRDLLHNEDR                        | 1305.4             | 2            | 2.7251 | 0.2335 |
| HRDYETATLSDIK                     | 1549.7             | 2            | 4.3201 | 0.4111 |
| HRDYKVDLESK                       | 1390.5             | 2            | 2.9324 | 0.1788 |
| HREEEQLLVQR                       | 1437.6             | 3            | 3.4186 | 0.1506 |
| HREELEQSK                         | 1156.2             | 2            | 2.5524 | 0.1451 |
| HREELSDYEERIEELENLLQQGGSGVIETDLSK | 3818.1             | 3            | 4.0515 | 0.298  |
| HRELSGGAEAGTVPTSPGKVPEDSLAR       | 2719.9             | 3            | 4.6993 | 0.3081 |
| HRFDPVETK                         | 1129.3             | 2            | 2.5658 | 0.1781 |
| HRFEVNPNIK                        | 1367.6             | 2            | 2.473  | 0.1433 |
| HRGEGENEAVTPK                     | 1424.5             | 2            | 3.4614 | 0.2856 |

| Peptide Sequence                | Peptide mass (m/z) | Charge State | Xcorr  | DelCn2 |
|---------------------------------|--------------------|--------------|--------|--------|
| HRGPGLASGQLYSYPAR               | 1831.0             | 2            | 4.2672 | 0.4609 |
| HRGPSEVLPPHPEVELLR              | 2063.3             | 2            | 3.9173 | 0.4086 |
| HRGQAAQPEPSTGFTATPPAPDSPQEPLVLR | 3254.6             | 3            | 4.7821 | 0.3571 |
| HRGYLSETVSNALGPQGR              | 1943.1             | 2            | 2.6939 | 0.1112 |
| HRHPDEAAFFDTASTGK               | 1888.0             | 2            | 2.7835 | 0.2006 |
| HRLDLGEDYPSGK                   | 1487.6             | 2            | 5.068  | 0.3241 |
| HRLEDMEQALSPSVFK                | 1888.1             | 2            | 4.2577 | 0.4073 |
| HRLEVEVHQLQDR                   | 1659.8             | 3            | 3.2372 | 0.1679 |
| HRLPDLQAILR                     | 1332.6             | 3            | 4.0238 | 0.1811 |
| HRLQAQLDLIEKDYADR               | 2085.3             | 3            | 4.4436 | 0.3114 |
| HRPDLIDFDK                      | 1256.4             | 2            | 3.1574 | 0.2224 |
| HRPDLIDFDKLLK                   | 1497.7             | 2            | 3.3047 | 0.2705 |
| HRPDLLDFDSLKDNVFENNR            | 2532.7             | 3            | 3.3178 | 0.1153 |
| HRPEDVVQFLVSK                   | 1554.8             | 2            | 4.2378 | 0.3619 |
| HRPEDVVQFLVSKK                  | 1682.9             | 3            | 3.8686 | 0.275  |
| HRPELIDYGK                      | 1228.4             | 2            | 3.793  | 0.3276 |
| HRPELIEYDK                      | 1300.4             | 2            | 3.2645 | 0.2263 |
| HRPELIEYDKLR                    | 1569.8             | 3            | 5.0942 | 0.4066 |
| HRPELIEYDKLRKDDPVTNLNNAFEVAEK   | 3455.8             | 3            | 3.8064 | 0.3008 |
| HRPFPEEVDKIPFVK                 | 1839.1             | 3            | 5.2333 | 0.2862 |
| HRPLNLGPFVVR                    | 1405.7             | 3            | 3.5795 | 0.1826 |
| HRPSEADEEELAR                   | 1539.6             | 3            | 4.1191 | 0.3602 |
| HSAEVAGYQDSIGQLENDLR            | 2203.3             | 2            | 4.2239 | 0.483  |
| HSAEVAGYQDSIGQLENDLRNTK         | 2546.7             | 3            | 5.0161 | 0.4921 |
| HSAGGGNVQIVTK                   | 1268.4             | 2            | 3.7919 | 0.3902 |
| HSAILASPNPDEK                   | 1379.5             | 2            | 4.4203 | 0.4203 |
| HSALTIPPTAGPHPFASFHPGLNPLER     | 2863.2             | 3            | 3.2873 | 0.2517 |
| HSASLIFLHGSGDSGQGLR             | 1940.1             | 2            | 5.3574 | 0.5399 |
| HSELTSLGYPNKK                   | 1850.1             | 3            | 5.528  | 0.4078 |
| HSDENDGGQPHKR                   | 1477.5             | 2            | 4.0319 | 0.3632 |
| HSDGIFTDSYSR                    | 1385.4             | 2            | 2.7089 | 0.1698 |
| HSEAATAQR                       | 971.0              | 2            | 2.43   | 0.2436 |
| HSEAATAQREEWK                   | 1543.6             | 2            | 4.2411 | 0.393  |
| HSEAFEALQK                      | 1288.4             | 2            | 4.0798 | 0.291  |
| HSEDQHPTILKK                    | 1433.6             | 2            | 2.8013 | 0.1787 |
| HSEIIKLENSIR                    | 1439.6             | 2            | 4.0526 | 0.3261 |



| Peptide Sequence                      | Peptide mass (m/z) | Charge State | Xcorr  | DelCn2 |
|---------------------------------------|--------------------|--------------|--------|--------|
| HSEIQQLER                             | 1140.2             | 2            | 2.8964 | 0.2003 |
| HSELLQKVEPLQK                         | 1549.8             | 2            | 4.1691 | 0.2423 |
| HSELSELVK                             | 1156.3             | 2            | 2.9505 | 0.123  |
| HSELVHVHAEALLR                        | 1540.8             | 2            | 4.5869 | 0.4214 |
| HSEVQQANLK                            | 1154.3             | 2            | 3.7122 | 0.3512 |
| HSEYNPQHSLLAQFR                       | 1828.0             | 3            | 4.7604 | 0.4195 |
| HSFDPFADASKGDDLLPAGTEDYIHIR           | 2989.2             | 3            | 5.1645 | 0.3184 |
| HSFFSGVNWQDVYDKK                      | 1958.1             | 2            | 3.0487 | 0.2345 |
| HSFFSTIDWVK                           | 1382.5             | 2            | 3.4334 | 0.2607 |
| HSFGPLDYESLQQELALK                    | 2076.3             | 2            | 4.8795 | 0.4984 |
| HSFGPLDYESLQQELALKETVWKK              | 2848.2             | 3            | 5.5167 | 0.4284 |
| HSFSAGPELLR                           | 1214.4             | 2            | 2.9704 | 0.3348 |
| HSGASAEVQKEEEKK                       | 1657.8             | 2            | 4.3206 | 0.3318 |
| HSGDYFTLLR                            | 1209.3             | 2            | 2.7575 | 0.2928 |
| HSGFEDELSEVLENQSSQAE                  | 2236.2             | 2            | 5.4215 | 0.3936 |
| HSGFEDELSEVLENQSSQAEK                 | 2477.6             | 2            | 6.2573 | 0.3969 |
| HSGFEDELSEVLENQSSQAEKAEVEEPSSK        | 3434.6             | 3            | 7.8972 | 0.4803 |
| HSGFEDELSEVLENQSSQAEKAEVEEPSSKDV      | 3648.8             | 3            | 6.5937 | 0.5218 |
| HSGFEDELSEVLENQSSQAEKAEVEEPSSKDVM     | 3780.0             | 3            | 5.6447 | 0.488  |
| HSGFEDELSEVLENQSSQAEKAEVEEPSSKDVME    | 3909.1             | 3            | 6.682  | 0.4766 |
| HSGFEDELSEVLENQSSQAEKGR               | 2690.8             | 3            | 5.6916 | 0.393  |
| HSGGFLSSPADFSQENKAPFEAVKR             | 2707.9             | 3            | 4.8362 | 0.3271 |
| HSGNITFDEIVNIAR                       | 1686.9             | 2            | 4.9328 | 0.553  |
| HSGPNSADSANDGFVR                      | 1631.6             | 2            | 4.3504 | 0.5154 |
| HSGSSHLPQQLK                          | 1319.5             | 2            | 4.2226 | 0.3132 |
| HSGYLWAIGK                            | 1132.3             | 2            | 2.4339 | 0.1016 |
| HSHQDSGLITDYR                         | 1529.6             | 2            | 3.0416 | 0.2812 |
| HSIDKVTSR                             | 1043.2             | 2            | 2.5602 | 0.2692 |
| HSILDTHGR                             | 1036.1             | 2            | 2.7887 | 0.2468 |
| HSISGPISTSKPLTALS DKRPNYGEIPVQEHLR    | 3743.2             | 3            | 4.6584 | 0.3995 |
| HSLASSEYPVR                           | 1246.4             | 2            | 3.232  | 0.3619 |
| HSLASTDEKR                            | 1144.2             | 2            | 3.3444 | 0.2752 |
| HSLDASQGTATGPR                        | 1398.5             | 2            | 4.7961 | 0.5038 |
| HSLEQKPTDAPPK                         | 1448.6             | 2            | 3.2952 | 0.1788 |
| HSLEQKPTDAPPKESLELEDPSSGLGVTK         | 3091.4             | 3            | 5.1815 | 0.3972 |
| HSLEQKPTDAPPKESLELEDPSSGLGVTKQDLGPVPM | 3929.4             | 3            | 3.3817 | 0.251  |

| Peptide Sequence                   | Peptide mass (m/z) | Charge State | Xcorr  | DelCn2 |
|------------------------------------|--------------------|--------------|--------|--------|
| HSLHEEENNIFKR                      | 1653.8             | 2            | 3.7386 | 0.3142 |
| HSLLPVDDAINGLSEEQR                 | 1994.2             | 2            | 6.0341 | 0.5058 |
| HSLLQTLYK                          | 1103.3             | 2            | 3.2059 | 0.2858 |
| HSLLQTLYKV                         | 1202.4             | 2            | 3.8492 | 0.3778 |
| HSLPDLPYDYGALEPHINAQIMQLHHSK       | 3226.6             | 3            | 5.6051 | 0.4353 |
| HSLPSGLGLSETQITSHGFDNTK            | 2427.6             | 3            | 5.9077 | 0.5509 |
| HSLTGHS DIR                        | 1123.2             | 2            | 2.6131 | 0.1749 |
| HSMAYQDLHSEITSLFK                  | 2008.2             | 2            | 5.4833 | 0.5665 |
| HSMNILNR                           | 985.1              | 2            | 2.6826 | 0.1039 |
| HSMNPFCEIAVEEAVR                   | 1833.1             | 2            | 2.9048 | 0.2214 |
| HSNLMLEDLDKSQEEIKK                 | 2158.4             | 3            | 3.2038 | 0.1813 |
| HSNLMLEELDKAQEDILK                 | 2127.4             | 3            | 3.7931 | 0.385  |
| HSPFHLLAGLQDGT LAAYPR              | 2165.4             | 3            | 5.5937 | 0.476  |
| HSPSHVGP KPHLDNMV PNALNVGLPDLQTK   | 3311.8             | 3            | 3.3237 | 0.1912 |
| HSPTDEESAK                         | 1230.2             | 2            | 3.0393 | 0.3864 |
| HSPTDEESAKAEADAYIR                 | 2120.2             | 3            | 3.6616 | 0.3685 |
| HSPTSEPTPPGDALPPVSSPHTHR           | 2502.7             | 3            | 4.6433 | 0.2353 |
| HSQAQSKPTTPEKTDLTNGEHAR            | 2534.7             | 3            | 3.3871 | 0.2331 |
| HSQAVEELAEQLEQTK                   | 1841.0             | 2            | 5.4193 | 0.4306 |
| HSQAVEELAEQLEQTKR                  | 1997.2             | 2            | 6.5796 | 0.493  |
| HSQDLAFLSMLNDIAAVPATAMPFR          | 2718.1             | 3            | 5.3694 | 0.389  |
| HSQDLAFLSMLNDIAAVPATAMPFRGYAVLGGER | 3621.1             | 3            | 3.5122 | 0.2354 |
| HSQEELLQR                          | 1140.2             | 2            | 2.984  | 0.328  |
| HSQEIAQFQAELAEAR                   | 1829.0             | 2            | 2.9368 | 0.2378 |
| HSQFIGYPITLFVEK                    | 1780.1             | 3            | 5.0298 | 0.502  |
| HSQFIGYPITLFVEKER                  | 2065.4             | 3            | 6.6639 | 0.5169 |
| HSQFIGYPITLYLEK                    | 1810.1             | 2            | 4.9039 | 0.513  |
| HSQFIGYPITLYLEKER                  | 2095.4             | 3            | 6.0077 | 0.478  |
| HSQFLGYPITLYLEK                    | 1810.1             | 2            | 5.1652 | 0.4081 |
| HSQFLGYPITLYLEKER                  | 2095.4             | 2            | 7.0194 | 0.5031 |
| HSQGTFTSDYSK                       | 1358.4             | 2            | 4.399  | 0.4665 |
| HSQNGFIVPPPPEK                     | 1547.7             | 2            | 4.3043 | 0.3982 |
| HSQPATPTPLQSR                      | 1420.6             | 2            | 3.4219 | 0.3728 |
| HSQYHVDGSLEK                       | 1400.5             | 2            | 3.3675 | 0.2577 |
| HSQYHVDGSLEKDR                     | 1671.8             | 2            | 3.8388 | 0.4084 |
| HSRASLQVLGTVGEPINPEAWLWYHRVVG AQR  | 3629.1             | 3            | 3.5116 | 0.1021 |

| Peptide Sequence             | Peptide mass (m/z) | Charge State | Xcorr  | DelCn2 |
|------------------------------|--------------------|--------------|--------|--------|
| HSSALGGASLGAR                | 1184.3             | 2            | 3.3535 | 0.376  |
| HSSDINHLVTQGR                | 1464.6             | 2            | 4.5315 | 0.4963 |
| HSSHGSDVLSQILKPNR            | 1963.1             | 2            | 4.9719 | 0.481  |
| HSSLAGCQIINR                 | 1462.7             | 2            | 4.2941 | 0.4647 |
| HSSLITPLQAVAQR               | 1521.7             | 2            | 3.7518 | 0.3412 |
| HSSLITPLQAVAQRDPIIAK         | 2159.5             | 3            | 3.3081 | 0.221  |
| HSSQTSNLAHK                  | 1210.3             | 2            | 3.2301 | 0.3092 |
| HSSAPPPPPGRR                 | 1440.6             | 2            | 3.0389 | 0.1581 |
| HSSVYPTQEELEAVQNMVSHTER      | 2672.9             | 3            | 5.9008 | 0.4746 |
| HSSYTCICGSGENSAVLHYGHAGAPNDR | 2905.1             | 3            | 3.3159 | 0.1585 |
| HSTENDSPTNVQQ                | 1457.4             | 2            | 2.6329 | 0.2193 |
| HSTFGQSLTQR                  | 1262.4             | 2            | 3.4198 | 0.4278 |
| HSTGDTKVPFCLQSCVKPLK         | 2189.6             | 3            | 3.4823 | 0.1542 |
| HSTIVPENAAHQGANR             | 1702.8             | 2            | 2.4007 | 0.3855 |
| HSTLDFMLGAK                  | 1220.4             | 2            | 2.8175 | 0.3035 |
| HSTPHAAFQPNSEQIGEEMSQNSFIK   | 2787.0             | 3            | 6.3428 | 0.4411 |
| HSTVLENTDGK                  | 1201.3             | 2            | 2.9101 | 0.2291 |
| HSTYSSVRPASR                 | 1348.4             | 2            | 2.6696 | 0.1138 |
| HSVASAQLQEK                  | 1198.3             | 2            | 3.3315 | 0.309  |
| HSVATAADLELK                 | 1255.4             | 2            | 3.1009 | 0.3318 |
| HSVESMITTLDPGMAYIK           | 2091.4             | 2            | 5.3697 | 0.5217 |
| HSVGVVIGR                    | 924.1              | 1            | 2.643  | 0.1847 |
| HSVHTLVFR                    | 1096.3             | 2            | 2.4218 | 0.2267 |
| HSVPLPELSSEAK                | 1495.7             | 2            | 3.1206 | 0.2955 |
| HSVPVYFPAQDPR                | 1513.7             | 2            | 2.6308 | 0.2887 |
| HSVVAGGGGGEGR                | 1140.2             | 2            | 3.5289 | 0.4591 |
| HSYFEKPKVDDEPMDVDKGGPGSTK    | 2708.0             | 3            | 5.6197 | 0.2904 |
| HSYTASYDIYDLNKR              | 1847.0             | 3            | 4.6842 | 0.4725 |
| HTAAGQLVQDLLTQVR             | 1751.0             | 2            | 3.5613 | 0.2548 |
| HTAAPTDPADGPV                | 1249.3             | 2            | 3.4916 | 0.3633 |
| HTAFIGDRN                    | 1031.1             | 1            | 1.9424 | 0.1114 |
| HTALAANTQSQQNMHTTTLAR        | 2296.5             | 3            | 4.3975 | 0.4139 |
| HTAMVSWGGSIPNSPFR            | 1944.2             | 2            | 4.7419 | 0.509  |
| HTATGDTIVSSK                 | 1217.3             | 2            | 2.6774 | 0.3027 |
| HTDNVTQWLR                   | 1270.4             | 2            | 3.0582 | 0.301  |
| HTDNVIQWLNAMDEIGLPK          | 2195.5             | 2            | 6.3514 | 0.6082 |

| Peptide Sequence                 | Peptide mass (m/z) | Charge State | Xcorr  | DelCn2 |
|----------------------------------|--------------------|--------------|--------|--------|
| HTEHVFALRPVGFR                   | 1666.9             | 2            | 2.4452 | 0.1315 |
| HTELKEK                          | 885.0              | 2            | 2.556  | 0.1232 |
| HTENEEDKVSSSSFR                  | 1752.8             | 2            | 5.1419 | 0.4502 |
| HTENTFSRPGGR                     | 1359.4             | 2            | 2.9779 | 0.3401 |
| HTGAVLK                          | 725.9              | 1            | 1.8105 | 0.1748 |
| HTGAVLKGPFSR                     | 1270.5             | 2            | 2.6327 | 0.3369 |
| HTGFLEISQHSQEFINR                | 2044.2             | 2            | 5.555  | 0.4384 |
| HTGPGILSMANAGPNTNCSQCFICTAK      | 2738.1             | 3            | 5.8539 | 0.3942 |
| HTGPGILSMANAGPNTNGSQFFICTAK      | 2736.1             | 3            | 5.9506 | 0.4929 |
| HTGPNSPDTANDGFVR                 | 1685.7             | 3            | 4.5563 | 0.5072 |
| HTGYVIELQHVVK                    | 1523.8             | 3            | 4.8539 | 0.4329 |
| HTGYVIELQHVVKGPSGCVESLEVTCT      | 2942.4             | 3            | 4.0622 | 0.2756 |
| HTHVQDGEAGGITQQIGATNVPLEAINEQTK  | 3258.5             | 3            | 7.9082 | 0.4768 |
| HTIAVVWGGVNIHPSPYR               | 2004.3             | 2            | 3.8002 | 0.4164 |
| HTLADNFPVSEER                    | 1629.7             | 2            | 5.2529 | 0.5507 |
| HTLDQYVESDYTLLYLHHGLTSDNKPSLSWLR | 3804.2             | 3            | 4.4504 | 0.3248 |
| HTLEQHNWNIEAAVQDR                | 2062.2             | 3            | 3.298  | 0.1898 |
| HTLGENIADNGGLK                   | 1439.6             | 2            | 3.654  | 0.3866 |
| HTLNQIDEVK                       | 1197.3             | 2            | 2.7964 | 0.1784 |
| HTLQQHQETPK                      | 1347.5             | 2            | 3.4088 | 0.4626 |
| HTLSFVDVGTGK                     | 1261.4             | 2            | 2.9053 | 0.375  |
| HTLSYVDVGTGK                     | 1277.4             | 2            | 3.1305 | 0.2455 |
| HTMMFSATFPK                      | 1298.6             | 2            | 3.2894 | 0.4106 |
| HTNLTK                           | 713.8              | 1            | 1.6994 | 0.1028 |
| HTNYTMEHIR                       | 1302.4             | 3            | 3.8582 | 0.3617 |
| HTPLVEFEEEEESDKRESE              | 2191.3             | 3            | 3.297  | 0.356  |
| HTQLEQMFR                        | 1190.4             | 2            | 2.94   | 0.2206 |
| HTRPTFSGQQIFALEK                 | 1861.1             | 2            | 4.2777 | 0.3631 |
| HTTDL DASK                       | 988.0              | 2            | 2.4782 | 0.2894 |
| HTTDL DASKIR                     | 1257.4             | 2            | 2.7794 | 0.2188 |
| HTTDL DASKITQGQFDEHYVLSSR        | 2749.9             | 3            | 3.5327 | 0.2826 |
| HTTEAAAGALQNITAGDRR              | 1954.1             | 2            | 3.4837 | 0.2396 |
| HTTSIFDDFAHYEK                   | 1711.8             | 2            | 4.3909 | 0.3937 |
| HTTSIFDDFSHYEK                   | 1727.8             | 2            | 3.5961 | 0.2608 |
| HTVDDGLDIR                       | 1141.2             | 2            | 2.5619 | 0.2953 |
| HTVDDGLDIRK                      | 1269.4             | 2            | 2.9344 | 0.3655 |

| Peptide Sequence                     | Peptide mass (m/z) | Charge State | Xcorr  | DelCn2 |
|--------------------------------------|--------------------|--------------|--------|--------|
| HTVPIYEGYALPHAILR                    | 1951.3             | 3            | 5.2225 | 0.4699 |
| HTVTMIPGDGIGPELMLHVK                 | 2146.6             | 3            | 5.2699 | 0.3654 |
| HTVYPKPEEWPK                         | 1511.7             | 2            | 3.3205 | 0.2785 |
| HTYLPLEVCNIVAGQR                     | 1814.1             | 2            | 2.7213 | 0.2762 |
| HVAAASLIR                            | 938.1              | 2            | 2.599  | 0.2406 |
| HVAAGTQQPYTDGVR                      | 1600.7             | 2            | 4.9002 | 0.4504 |
| HVAEDLGK                             | 869.0              | 1            | 2.3781 | 0.2311 |
| HVAEDLGKVFGER                        | 1457.6             | 2            | 4.1396 | 0.4    |
| HVAEVLEYTKDEQLESFQR                  | 2435.7             | 3            | 6.0181 | 0.467  |
| HVAVTNMNEHSSR                        | 1482.6             | 2            | 4.1877 | 0.4284 |
| HVDAHATLNDGVVVQVMGLLSNNNQALR         | 2987.3             | 3            | 3.3387 | 0.1033 |
| HVDAHATLSDGVVVQVMGLLSNSGQPERK        | 3046.4             | 3            | 5.5997 | 0.3617 |
| HVDNIMFENHTVADR                      | 1799.0             | 2            | 4.761  | 0.5241 |
| HVDNPNGDGR                           | 1081.1             | 2            | 2.9429 | 0.3012 |
| HVDSLSQR                             | 942.0              | 2            | 2.7601 | 0.2836 |
| HVEASGGSGPGDSGSPDPR                  | 1766.8             | 3            | 3.6399 | 0.3411 |
| HVEAVAYYKK                           | 1208.4             | 2            | 3.2338 | 0.3061 |
| HVEDGNVTVQHAALSALR                   | 1918.1             | 3            | 3.4794 | 0.242  |
| HVEKDVLIPIK                          | 1178.4             | 2            | 3.3204 | 0.2039 |
| HVENDGYK                             | 962.0              | 1            | 1.6935 | 0.1575 |
| HVENDGYKTIYFFGDK                     | 1934.1             | 2            | 4.8188 | 0.4538 |
| HVEPGNAAIR                           | 1064.2             | 2            | 2.5327 | 0.3213 |
| HVEPGNAIREK                          | 1321.5             | 3            | 3.6167 | 0.2866 |
| HVETNSYDVQR                          | 1348.4             | 2            | 3.1712 | 0.3904 |
| HVEVQVFGDHHGNAVYLFER                 | 2354.6             | 3            | 3.6762 | 0.2391 |
| HVFAIFNTEQR                          | 1362.5             | 2            | 3.6325 | 0.3833 |
| HVFGESDELIGQK                        | 1459.6             | 2            | 4.3021 | 0.49   |
| HVFGQPVK                             | 912.1              | 2            | 2.5064 | 0.2882 |
| HVFIHTGEKPFQCSQCDCMR                 | 2264.6             | 3            | 3.6068 | 0.3025 |
| HVFLTGPPGVGK                         | 1209.4             | 2            | 2.4795 | 0.1995 |
| HVFWGSGSHTLPALLENLK                  | 2107.4             | 2            | 2.7874 | 0.2029 |
| HVGDLGNVTADK                         | 1226.3             | 2            | 3.3887 | 0.3791 |
| HVGDLGNVTADKDGADVSIEDSVISLSGDHCCIIGR | 3666.0             | 3            | 7.1218 | 0.5886 |
| HVGKTDPGTVFVMNK                      | 1630.9             | 2            | 2.6555 | 0.2309 |
| HVGMAVAGLLADAR                       | 1381.6             | 2            | 4.7486 | 0.4647 |
| HVGNQQYNVTYVVK                       | 1649.8             | 2            | 4.167  | 0.4238 |

| Peptide Sequence              | Peptide mass (m/z) | Charge State | Xcorr  | DelCn2 |
|-------------------------------|--------------------|--------------|--------|--------|
| HVHLENATEYATLR                | 1654.8             | 2            | 3.8006 | 0.269  |
| HVHPTTAPDVTSSLPEEK            | 1946.1             | 2            | 4.6281 | 0.437  |
| HVIDFFK                       | 906.1              | 2            | 2.8332 | 0.2405 |
| HVINFDLPSDIEEYVHR             | 2084.3             | 3            | 5.6719 | 0.491  |
| HVISYSLSPFEQR                 | 1563.7             | 2            | 4.3676 | 0.4259 |
| HVLDTLIQLAK                   | 1251.5             | 2            | 3.5352 | 0.3237 |
| HVLFGTVGVPEHTYR               | 1712.9             | 2            | 4.4028 | 0.4095 |
| HVLFPLK                       | 854.1              | 2            | 2.4549 | 0.1097 |
| HVLFPLKSEFVILRDEK             | 2071.5             | 3            | 3.5543 | 0.3855 |
| HVLGILDR                      | 923.1              | 2            | 2.6088 | 0.1365 |
| HVLQTFGPIPEFSR                | 1628.9             | 2            | 3.7354 | 0.3892 |
| HVLSVLSK                      | 883.1              | 2            | 2.8526 | 0.1123 |
| HVLTTLGEK                     | 998.2              | 2            | 2.5704 | 0.1338 |
| HVLVILTMSSYAEALR              | 1919.2             | 2            | 5.4526 | 0.4279 |
| HVLVTLGEK                     | 996.2              | 2            | 2.8503 | 0.2655 |
| HVMDVVDEELSKLGLLDNHSSEFNVTR   | 3085.4             | 3            | 3.5619 | 0.1555 |
| HVNALISPGQK                   | 1164.3             | 2            | 2.8403 | 0.1554 |
| HVNEDSQEKK                    | 1214.3             | 2            | 2.8594 | 0.2309 |
| HVNGQDQIVPGLYACGEAACASVHGANKR | 2839.1             | 3            | 6.9143 | 0.4412 |
| HVNKDLGNMEENK                 | 1528.7             | 2            | 3.6193 | 0.2706 |
| HVNKDLGNMEENKK                | 1656.8             | 2            | 4.4456 | 0.4683 |
| HVNPVQALSEFK                  | 1369.6             | 2            | 2.6512 | 0.2317 |
| HVNTNPLCDLTPIFKDYEK           | 2248.5             | 3            | 4.1235 | 0.2644 |
| HVPGGGNVQIQNK                 | 1348.5             | 2            | 2.748  | 0.3776 |
| HVPGGGSVQIVYKPVDSLK           | 1981.3             | 2            | 2.9196 | 0.2355 |
| HVPVVYVDYGPASLTQIYGTFNR       | 2695.0             | 3            | 4.946  | 0.4905 |
| HVQETTDLSILSHFQSLSYSLAER      | 2649.9             | 2            | 4.5925 | 0.3842 |
| HVQGILR                       | 823.0              | 2            | 2.6022 | 0.1627 |
| HVQGPEPAKEVLLKDLLETR          | 2273.6             | 3            | 4.8997 | 0.3838 |
| HVQSLEPDPGTPGSER              | 1706.8             | 2            | 3.762  | 0.239  |
| HVSDDMK                       | 831.9              | 1            | 2.3824 | 0.2857 |
| HVSDDMKTHKNPALK               | 1722.0             | 3            | 3.3993 | 0.2851 |
| HVSHGEELR                     | 1064.1             | 2            | 2.7099 | 0.2495 |
| HVSIQEAESYAESVGAK             | 1805.9             | 2            | 5.5307 | 0.51   |
| HVSLPSFNQLFGLSDPVNR           | 2128.4             | 2            | 2.6943 | 0.2751 |
| HVSPAGAAVGIPLSEDEAK           | 1849.0             | 2            | 5.6738 | 0.532  |

| Peptide Sequence                     | Peptide mass (m/z) | Charge State | Xcorr  | DelCn2 |
|--------------------------------------|--------------------|--------------|--------|--------|
| HVTAQQPSR                            | 1024.1             | 2            | 2.4532 | 0.1939 |
| HVTVIGGGLMGAGIAQVAAATGHTVVLDQTEDILAK | 3615.2             | 3            | 8.4994 | 0.6243 |
| HVVFGEVTEGLDVLRL                     | 1670.9             | 2            | 3.4957 | 0.3714 |
| HVVFGFVK                             | 933.1              | 2            | 2.4146 | 0.2869 |
| HVVFYPTLK                            | 1104.3             | 2            | 2.6276 | 0.2665 |
| HVVLGAIENKVESK                       | 1523.8             | 2            | 4.8273 | 0.3824 |
| HVVPQVHVNGGALASER                    | 1842.1             | 2            | 3.9805 | 0.4894 |
| HVVPNEVVVQR                          | 1276.5             | 2            | 3.2825 | 0.425  |
| HVVQPGYPAHR                          | 1261.4             | 2            | 2.9057 | 0.2182 |
| HVVQSISTQQEK                         | 1384.5             | 2            | 4.3648 | 0.3814 |
| HVVQSISTQQEKETIAK                    | 1927.1             | 3            | 5.7623 | 0.4529 |
| HWILPQDYDHAQAEAR                     | 1951.1             | 2            | 4.8274 | 0.4091 |
| HWLDSPWPGFFTLDGQPR                   | 2157.4             | 3            | 3.364  | 0.2558 |
| HWMLDKLTGVFAPR                       | 1672.0             | 2            | 3.8496 | 0.4344 |
| HWMLDKLTGVFAPRPSTGPHK                | 2376.8             | 3            | 3.2862 | 0.2151 |
| HWNHPDSEELPGPPVVKPQSVTVR             | 2707.0             | 3            | 4.8084 | 0.3958 |
| HWPFMVVNDAGRPK                       | 1654.9             | 3            | 4.8663 | 0.4056 |
| HWPFQVINDGDKPK                       | 1681.9             | 3            | 5.2449 | 0.3904 |
| HYAGDVVYSVIGFIDK                     | 1784.0             | 2            | 3.9364 | 0.2209 |
| HYAMQEAK                             | 978.1              | 2            | 2.6253 | 0.2075 |
| HYASEEIKEK                           | 1234.3             | 2            | 3.2329 | 0.2462 |
| HYASHTGGAVGASSVLLVLPEELDTETINNKVPPR  | 3674.1             | 3            | 5.1058 | 0.3033 |
| HYCTVANPVSR                          | 1247.4             | 2            | 2.4644 | 0.2051 |
| HYCYPHFTCAVDTENIR                    | 2070.3             | 2            | 2.8997 | 0.1237 |
| HYDLDLVR                             | 1031.1             | 2            | 2.7989 | 0.1654 |
| HYDLSYDTGDK                          | 1314.3             | 2            | 3.1646 | 0.2764 |
| HYEAEHEYER                           | 1526.5             | 2            | 2.6685 | 0.2386 |
| HYEDGYPGGSDNYGSLSR                   | 1975.0             | 3            | 5.2381 | 0.5102 |
| HYEGLSYNVDSLHQQ                      | 1790.9             | 3            | 4.6374 | 0.4001 |
| HYEGSTVPEKK                          | 1275.4             | 2            | 3.1838 | 0.2695 |
| HYFQNTQGLIFVVDSNDR                   | 2154.3             | 2            | 4.7733 | 0.4376 |
| HYFQNTQGLIFVVDSNDRER                 | 2439.6             | 3            | 4.1766 | 0.269  |
| HYGGLTGLNK                           | 1060.2             | 2            | 3.4375 | 0.3519 |
| HYGGLTGLNKAETAAK                     | 1631.8             | 2            | 4.7123 | 0.4732 |
| HYGNKPIGMGGTFIIQK                    | 1862.2             | 2            | 4.8761 | 0.4486 |
| HYGPGWVSMANAGK                       | 1475.7             | 2            | 3.9851 | 0.4621 |

| Peptide Sequence                     | Peptide mass (m/z) | Charge State | Xcorr  | DelCn2 |
|--------------------------------------|--------------------|--------------|--------|--------|
| HYGPGWVSMANAGKDTNGSQFFITTVK          | 2915.2             | 3            | 3.6165 | 0.1297 |
| HYGYSYSVSNSEK                        | 1635.7             | 2            | 4.8898 | 0.5258 |
| HYGYSYSVSNSEKDIMAEIYK                | 2599.8             | 2            | 5.9711 | 0.4697 |
| HYGYSLYSAIK                          | 1302.5             | 2            | 3.0975 | 0.4169 |
| HYHHALPPSR                           | 1215.3             | 2            | 2.8922 | 0.2918 |
| HYIFNPR                              | 947.1              | 2            | 2.4076 | 0.2054 |
| HYILDLLR                             | 1043.2             | 2            | 2.6355 | 0.1592 |
| HYLDFINHYANLFHEK                     | 2062.3             | 2            | 5.5571 | 0.3959 |
| HYLFDVQR                             | 1078.2             | 2            | 2.883  | 0.2954 |
| HYLGHND DIK                          | 1212.3             | 2            | 2.6149 | 0.1224 |
| HYLHIIENKPLYPVYIDSNQGVVLSMPPIINGDHSR | 4003.6             | 3            | 4.1592 | 0.2872 |
| HYLHPEEPEYLGK                        | 1612.8             | 2            | 2.912  | 0.2006 |
| HYLLAAVNRQPK                         | 1410.6             | 2            | 3.9033 | 0.234  |
| HYLLSQGWVDEEQEK                      | 1949.1             | 2            | 4.153  | 0.415  |
| HYNEEGSQVYNDAHILEK                   | 2147.2             | 3            | 5.4621 | 0.3996 |
| HYNGEAYEDDEHHPR                      | 1869.8             | 2            | 5.8184 | 0.5151 |
| HYQGTVDK                             | 948.0              | 2            | 2.4008 | 0.1001 |
| HYQHVLAVDPEK                         | 1436.6             | 2            | 3.5385 | 0.3425 |
| HYQTGQPLPK                           | 1169.3             | 2            | 2.6748 | 0.1522 |
| HYSDELQSVISHLLR                      | 1798.0             | 2            | 5.6728 | 0.4493 |
| HYSVVLPTVSHSGFLYK                    | 1935.2             | 3            | 4.6517 | 0.4412 |
| HYTEAIKR                             | 1018.2             | 1            | 2.1942 | 0.1385 |
| IAAAGLDVTSPEPLPTNHPLLTLK             | 2469.9             | 3            | 4.9917 | 0.4668 |
| IAAAILNTPDLR                         | 1268.5             | 2            | 3.8868 | 0.301  |
| IAAAILNTPDLRK                        | 1396.7             | 2            | 3.3735 | 0.3    |
| IAAEEKKKQDELKR                       | 1686.9             | 2            | 4.1577 | 0.2577 |
| IAAGEKIPLSQEEITLQGHAFEAR             | 2609.9             | 3            | 5.7704 | 0.3983 |
| IAAGLPMAGIPFLTTDLTYR                 | 2122.5             | 2            | 3.7583 | 0.2506 |
| IAAHPNVQK                            | 978.1              | 2            | 2.5799 | 0.1874 |
| IAALQAFADQLIAAGHYAK                  | 1973.3             | 3            | 5.4212 | 0.4905 |
| IAAPLTKVDEIVVLSGDNSK                 | 2070.4             | 3            | 3.5427 | 0.2027 |
| IAAQDLLLAVATDFQNESAAAALAAAATR        | 2788.1             | 3            | 4.6031 | 0.3184 |
| IAAVHNVPLSVLIRPLPSVLDPK              | 2521.0             | 3            | 3.8011 | 0.2676 |
| IADDKYNDTFWKEFGTNIK                  | 2306.5             | 2            | 5.0985 | 0.4771 |
| IADFGLARVFS PDGSR                    | 1708.9             | 2            | 2.9531 | 0.1718 |
| IADGSVKREDIFYTSK                     | 1830.0             | 3            | 3.3669 | 0.254  |



| Peptide Sequence                  | Peptide mass (m/z) | Charge State | Xcorr  | DelCn2 |
|-----------------------------------|--------------------|--------------|--------|--------|
| IADGYEQAAR                        | 1094.2             | 2            | 4.0218 | 0.3704 |
| IADLPPANPDHIGGYR                  | 1706.9             | 2            | 3.561  | 0.4203 |
| IADMGHLK                          | 885.1              | 2            | 2.5773 | 0.1832 |
| IADNHTPK                          | 896.0              | 2            | 2.7096 | 0.1299 |
| IADRLGLELGK                       | 1185.4             | 2            | 2.9755 | 0.2271 |
| IADRLGLELGKVVTK                   | 1612.9             | 2            | 3.4982 | 0.2153 |
| IAEANKLK                          | 887.1              | 2            | 2.5399 | 0.1277 |
| IAEESNFPFIK                       | 1295.5             | 2            | 3.2165 | 0.2083 |
| IAEFAFEYAR                        | 1217.4             | 2            | 3.3962 | 0.2115 |
| IAEFTTNLTETEEEEK                  | 1654.8             | 2            | 4.6927 | 0.403  |
| IAEFTTNLTETEEEEKSK                | 1870.0             | 2            | 5.0781 | 0.4606 |
| IAEGAQQGDPLSR                     | 1342.4             | 2            | 3.1313 | 0.2719 |
| IAEGEHPKDIR                       | 1265.4             | 2            | 2.6057 | 0.1409 |
| IAEGGAAHR                         | 882.0              | 2            | 2.4447 | 0.173  |
| IAEIHESR                          | 955.1              | 2            | 2.4005 | 0.149  |
| IAEKDDDLKR                        | 1203.3             | 2            | 2.6867 | 0.1176 |
| IAELEMGLLHLQQNIEIPEISLPIHPMITNVAK | 3707.4             | 3            | 6.149  | 0.4039 |
| IAELLENVTLIHKPVSLQPR              | 2271.7             | 3            | 4.2351 | 0.4078 |
| IAELLSPGSVDPLTR                   | 1568.8             | 2            | 5.0327 | 0.371  |
| IAEMTDIKPILR                      | 1400.7             | 2            | 2.6242 | 0.2073 |
| IAENPANPPVGGK                     | 1264.4             | 2            | 3.341  | 0.3191 |
| IAEQQKAQAEVEGLGKGVAR              | 2083.3             | 3            | 4.9979 | 0.1849 |
| IAEQVASFQEEK                      | 1379.5             | 2            | 4.1275 | 0.3459 |
| IAESLGGSGYSVER                    | 1425.5             | 2            | 2.7242 | 0.3363 |
| IAESNHIK                          | 912.0              | 2            | 2.9137 | 0.1787 |
| IAETDFEKR                         | 1109.2             | 2            | 2.472  | 0.1028 |
| IAEVDASVVR                        | 1059.2             | 2            | 3.1133 | 0.2843 |
| IAEVGAGGNK                        | 916.0              | 2            | 2.5478 | 0.1867 |
| IAEVGGVPYLLPLVNQK                 | 1811.2             | 2            | 4.8273 | 0.3353 |
| IAEVGGVPYLLPLVNQKK                | 1939.3             | 2            | 3.7139 | 0.2376 |
| IAFAITAIK                         | 948.2              | 2            | 3.3446 | 0.1753 |
| IAFGGETDEATR                      | 1267.3             | 2            | 3.6711 | 0.3388 |
| IAFIMDESNVLD SGFLER               | 2057.3             | 2            | 4.1563 | 0.3462 |
| IAGAGLLFVGGGIGGTILYAK             | 1949.3             | 2            | 4.8304 | 0.3753 |
| IAGDQSTLQR                        | 1089.2             | 2            | 3.3039 | 0.2426 |
| IAGHPLAQNER                       | 1206.3             | 2            | 3.0483 | 0.2726 |

| Peptide Sequence               | Peptide mass (m/z) | Charge State | Xcorr  | DelCn2 |
|--------------------------------|--------------------|--------------|--------|--------|
| IAGLEEEKQK                     | 1145.3             | 2            | 2.6984 | 0.1878 |
| IAGMDPVVHSALQEER               | 1753.0             | 2            | 3.2221 | 0.2589 |
| IAGPGLGSGVR                    | 984.1              | 2            | 2.938  | 0.2828 |
| IAGQVAAANK                     | 943.1              | 2            | 3.2557 | 0.2399 |
| IAGQVAAANKKH                   | 1208.4             | 2            | 3.2518 | 0.2069 |
| IAGYVTHLMK                     | 1133.4             | 2            | 3.4338 | 0.3738 |
| IAHFDLKPENIMLLDKNVPNPR         | 2576.0             | 3            | 3.6759 | 0.1123 |
| IAHIMGPPDR                     | 1107.3             | 2            | 2.6508 | 0.168  |
| IAHLAGVKDQLTKENEELKQR          | 2421.7             | 3            | 3.5937 | 0.1816 |
| IAIDNLEKAELLQGGDLLR            | 2082.4             | 2            | 2.6531 | 0.3247 |
| IAIIVDDIIDDVDSFLAAAETLKER      | 2747.1             | 2            | 4.6406 | 0.5435 |
| IAIIVDDIIDDVESFVAAAIEILKER     | 2759.1             | 2            | 4.1077 | 0.3363 |
| IAILDIEPQTLK                   | 1354.6             | 2            | 3.2455 | 0.3135 |
| IAILGFAFKK                     | 1108.4             | 2            | 2.5118 | 0.2021 |
| IAILHENFTTVKPEDAYEDFIVKPPVR    | 3143.6             | 3            | 6.1806 | 0.5238 |
| IAILHENFTTVKPEDAYEDFIVKPPVRK   | 3271.8             | 3            | 5.6104 | 0.3931 |
| IAILTCPFEPKPK                  | 1554.9             | 2            | 2.7845 | 0.2845 |
| IAIPGLAGAGNSVLLVSNLNPER        | 2276.6             | 2            | 5.7671 | 0.5298 |
| IAIVNHDK                       | 910.1              | 2            | 2.5752 | 0.1986 |
| IAIYELLFK                      | 1110.4             | 2            | 2.659  | 0.1336 |
| IAIYELLFKEGVMVAK               | 1825.2             | 2            | 3.4874 | 0.2589 |
| IAKEEIFGPVQEILR                | 1743.0             | 2            | 3.0347 | 0.2296 |
| IAKEEIFGPVQPILK                | 1683.0             | 2            | 3.9583 | 0.297  |
| IAKEEIFGPVQPLFK                | 1717.0             | 2            | 4.5457 | 0.2343 |
| IAKEEIFGPVQPLFKFK              | 1992.4             | 2            | 2.4389 | 0.1087 |
| IAKEEIFGPVQQIMK                | 1732.1             | 3            | 5.2468 | 0.4018 |
| IAKEEIFGPVQQIMKFK              | 2007.4             | 3            | 3.7624 | 0.2345 |
| IAKEIQVIPLQRDDED               | 1883.1             | 2            | 4.1976 | 0.1809 |
| IALDKNPETRPSAAQLLEHPPFVSSITSNK | 3165.5             | 3            | 5.5045 | 0.4155 |
| IALLEEAKK                      | 1015.2             | 2            | 2.6986 | 0.1758 |
| IALLEEAR                       | 915.1              | 2            | 2.9009 | 0.1299 |
| IALLPLLQAETDRR                 | 1609.9             | 2            | 2.6106 | 0.125  |
| IALLSLLDDANLR                  | 1555.8             | 2            | 2.8618 | 0.2594 |
| IALTDNALIAR                    | 1171.4             | 2            | 3.6653 | 0.3363 |
| IALVITDGR                      | 958.1              | 2            | 2.8835 | 0.2045 |
| IAMENDDGRTEEEKHSAVQR           | 2316.5             | 3            | 4.5195 | 0.3316 |

| Peptide Sequence                       | Peptide mass (m/z) | Charge State | Xcorr  | DelCn2 |
|----------------------------------------|--------------------|--------------|--------|--------|
| IANAIMK                                | 761.0              | 1            | 1.9292 | 0.1059 |
| IANATEGSSER                            | 1135.2             | 2            | 3.5212 | 0.3237 |
| IANAVVQNLERGPVQTHISEVIR                | 2544.9             | 3            | 4.1517 | 0.2385 |
| IANAYIIKEHFKEK                         | 1576.8             | 2            | 4.0819 | 0.2922 |
| IANDNSLNHEYLPILGLAEFR                  | 2400.7             | 3            | 5.7728 | 0.5162 |
| IANEVIGEMNLKPEEVFLAQGTLRPDLIESASLVASGK | 4041.6             | 3            | 5.9614 | 0.4495 |
| IANFKIEPPGLFR                          | 1502.8             | 2            | 3.8746 | 0.1946 |
| IANILKDKDPPPIVAK                       | 1733.1             | 3            | 3.6478 | 0.3965 |
| IANKLFGEK                              | 1020.2             | 2            | 2.4786 | 0.2331 |
| IANLLKPKDK                             | 1012.2             | 2            | 2.8161 | 0.1276 |
| IANLLKPKDKEIVQDGDHMIIR                 | 2419.8             | 3            | 6.9573 | 0.5105 |
| IANLQTDLSDGLR                          | 1416.6             | 2            | 4.1663 | 0.4114 |
| IANPVEGSSGR                            | 1087.2             | 2            | 2.9024 | 0.3211 |
| IANPVEGSTDR                            | 1159.2             | 2            | 3.1474 | 0.3589 |
| IANPVEGSTDRQVTITGSAASISLAQYLINVR       | 3346.7             | 3            | 3.3395 | 0.1298 |
| IAPLAEGALPYNLAELQR                     | 1940.2             | 2            | 4.9276 | 0.3721 |
| IAPLEEGTLPFNLAEAQR                     | 1970.2             | 2            | 5.4634 | 0.5106 |
| IAPNHLNVYINLANLIR                      | 1949.3             | 2            | 2.7871 | 0.2338 |
| IAPVHIDTESISALIK                       | 1708.0             | 2            | 2.6248 | 0.1098 |
| IAQDLEMYGINYFEIK                       | 1948.2             | 2            | 4.9636 | 0.3314 |
| IAQDLEMYGVNYFSIK                       | 1892.2             | 2            | 3.4031 | 0.3744 |
| IAQFLSDIPETVPLSTVNR                    | 2101.4             | 2            | 5.1056 | 0.475  |
| IAQITGPPDR                             | 1068.2             | 2            | 2.4397 | 0.2158 |
| IAQLEEELEEEQGNTELINDR                  | 2473.6             | 2            | 6.8265 | 0.4242 |
| IAQLEEELEEEQGNTELINDRLK                | 2714.9             | 3            | 6.0538 | 0.4258 |
| IAQLEEELEEEQSNMELLNDR                  | 2533.7             | 3            | 5.3713 | 0.2316 |
| IAQLEEELEEEQSNMELLNDRFR                | 2837.1             | 3            | 3.8503 | 0.2302 |
| IAQLEEQLDNETK                          | 1531.6             | 2            | 4.8285 | 0.3527 |
| IAQLEEQLDNETKER                        | 1816.9             | 2            | 5.3842 | 0.3496 |
| IAQNDHDLGDMSTVADPSVISHLFSHR            | 2964.2             | 3            | 6.2904 | 0.4795 |
| IAQNFGLQHLSSGHFLR                      | 1926.2             | 2            | 4.9214 | 0.4885 |
| IAQSAELADREK                           | 1331.5             | 2            | 2.5938 | 0.1248 |
| IAQSDYIPTQQDVLR                        | 1747.9             | 2            | 4.2133 | 0.3411 |
| IAQSEAE LISDEAQADLALR                  | 2144.3             | 2            | 5.3309 | 0.331  |
| IARDEGGK                               | 845.9              | 2            | 2.6968 | 0.1822 |
| IARELAEDDSILK                          | 1473.7             | 3            | 4.2823 | 0.2819 |

| Peptide Sequence                 | Peptide mass (m/z) | Charge State | Xcorr  | DelCn2 |
|----------------------------------|--------------------|--------------|--------|--------|
| IASDEEIQGTK                      | 1191.3             | 2            | 3.054  | 0.1803 |
| IASDEEIQGTKDAVIQDLER             | 2231.4             | 3            | 5.3332 | 0.2216 |
| IASGLGLAWIVGR                    | 1313.6             | 2            | 3.5065 | 0.3976 |
| IASHYYITNDTVQTYNQLLKPTLSEIELFR   | 3573.0             | 3            | 4.539  | 0.4256 |
| IASLEVENQSLR                     | 1359.5             | 2            | 4.3673 | 0.343  |
| IASLEVENQSLRGVVQELQQAISK         | 2641.0             | 3            | 6.0813 | 0.4026 |
| IASLEVENQSLRGVVQELQQAISKLEAR     | 3110.5             | 3            | 6.0391 | 0.3833 |
| IASNSATAFR                       | 1038.1             | 2            | 2.9328 | 0.2672 |
| IASQVAALDLGYKPGVEAIR             | 2072.4             | 3            | 4.0426 | 0.3227 |
| IASWADLVNAHVVPKSGVVK             | 2020.3             | 2            | 2.9486 | 0.2563 |
| IATEKDFLEAVNK                    | 1478.7             | 2            | 2.8556 | 0.2332 |
| IATEKDFLEAVNKVIK                 | 1819.1             | 3            | 4.6952 | 0.3522 |
| IATKNDVDVQIDQESYLPEDIAGGVEIYNGDR | 3538.8             | 3            | 5.9771 | 0.2711 |
| IATNALKGHAK                      | 1124.3             | 2            | 3.5036 | 0.3025 |
| IATSLDGFDVASVQQQR                | 1836.0             | 2            | 4.8886 | 0.3841 |
| IATTAEPADKVK                     | 1244.4             | 2            | 2.7102 | 0.2561 |
| IAVAAQNCYK                       | 1081.3             | 2            | 3.1361 | 0.2441 |
| IAVAINGELVNAAR                   | 1435.6             | 2            | 2.4482 | 0.11   |
| IAVEAQNKYER                      | 1321.5             | 2            | 3.1015 | 0.3255 |
| IAVEAQNKYERELMLHAADVEALQAAK      | 3013.4             | 3            | 3.7352 | 0.2492 |
| IAVGSDADLVIWDPDSVK               | 1901.1             | 2            | 3.4308 | 0.2313 |
| IAVGSDADLVIWDPDSVKTISAK          | 2401.7             | 3            | 4.2101 | 0.3804 |
| IAVGSDADVVIWDPDKLK               | 1942.2             | 2            | 4.2945 | 0.3064 |
| IAVSKPSGPQPQADLQALLQSGAQVR       | 2661.0             | 3            | 4.832  | 0.2574 |
| IAVVAFFPENGVSDFQK                | 1869.1             | 2            | 4.1972 | 0.413  |
| IAVVGGR                          | 800.9              | 2            | 2.5378 | 0.1292 |
| IAWPPPTLGLSSGSALEEGIK            | 2140.4             | 3            | 4.1809 | 0.3112 |
| ICHCFKDEKPVVEAIR                 | 1876.2             | 2            | 2.7542 | 0.1081 |
| IDAASPLEKVCLIGCGFSTGYGSAVK       | 2588.0             | 3            | 3.6994 | 0.278  |
| IDAMHGVVGPYVK                    | 1386.6             | 2            | 3.5748 | 0.2904 |
| IDAMHGVVGPYVKK                   | 1514.8             | 2            | 3.901  | 0.3521 |
| IDASKNEEDEGHSNSSPR               | 1973.0             | 3            | 5.0237 | 0.3955 |
| IDASKNEEDEGK                     | 1335.4             | 2            | 3.9073 | 0.2942 |
| IDASKSVDEVFDEVVQIFDKEG           | 2470.7             | 2            | 5.0327 | 0.4682 |
| IDASQTEFEK                       | 1168.2             | 2            | 2.7108 | 0.2315 |
| IDASQTEFEKNVWSFLK                | 2043.3             | 2            | 3.7782 | 0.3809 |

| Peptide Sequence                      | Peptide mass (m/z) | Charge State | Xcorr  | DelCn2 |
|---------------------------------------|--------------------|--------------|--------|--------|
| IDATQVEVNPFGGETPEGQVVCFDAK            | 2695.0             | 3            | 5.1489 | 0.4241 |
| IDATSASVLASR                          | 1191.3             | 2            | 4.4568 | 0.4202 |
| IDATSASVLASRFDVSGYPTIK                | 2299.6             | 3            | 5.0893 | 0.4049 |
| IDAVNAETIR                            | 1102.2             | 2            | 2.6351 | 0.1053 |
| IDDGHRLCSDLMNCLHER                    | 2128.4             | 3            | 3.3238 | 0.1083 |
| IDDIADGAVKPPPNKYPIFFFGTHETAFLGPK      | 3505.0             | 3            | 4.5184 | 0.3974 |
| IDDIRKPGESEEE                         | 1388.5             | 2            | 3.0755 | 0.2253 |
| IDDIVSGHK                             | 984.1              | 2            | 2.7893 | 0.2067 |
| IDDIVSGHKK                            | 1112.3             | 2            | 2.6085 | 0.152  |
| IDDKPVKIDK                            | 1171.4             | 2            | 2.589  | 0.1293 |
| IDDKPVKIDKWDGSAVK                     | 1915.2             | 3            | 4.5148 | 0.4288 |
| IDDLEKNIADLMTQAGVEELENKIPATQK         | 3444.8             | 3            | 5.1498 | 0.2743 |
| IDDLEKNIADLMTQAGVEELENKIPATQKS        | 3531.9             | 3            | 4.9044 | 0.4596 |
| IDDLIKLHPESKDDKHGSYEDAVHSGALND        | 3320.5             | 3            | 6.3536 | 0.4035 |
| IDDLQMVLNQTEDHR                       | 1828.0             | 2            | 3.9197 | 0.2289 |
| IDDMSSRIDDLEKNIADLMTQAGVEELENKIPATQKS | 4336.8             | 3            | 3.8003 | 0.2004 |
| IDDPTDSKPEDWDKPEHIPDPDAK              | 2761.9             | 3            | 3.2869 | 0.12   |
| IDDSKEAMER                            | 1194.3             | 2            | 3.3583 | 0.341  |
| IDDVVNTR                              | 932.0              | 2            | 2.563  | 0.25   |
| IDELPEGAVKPPANKYPIFFFGTHETAFLGPK      | 3533.0             | 3            | 5.5183 | 0.3454 |
| IDEMPEAAVK                            | 1103.3             | 2            | 3.3347 | 0.2637 |
| IDEPLEGSSEDR                          | 1260.3             | 2            | 3.8776 | 0.2979 |
| IDEPLEGSSEDRITITGTQDQIQNAQYLLQNSVK    | 3832.2             | 3            | 5.7828 | 0.467  |
| IDESSLTGESDHVKK                       | 1645.8             | 2            | 4.1298 | 0.3153 |
| IDEYDYSKPIQGQQK                       | 1813.0             | 2            | 4.8495 | 0.3132 |
| IDFEKEPLGVNAK                         | 1460.7             | 2            | 3.9335 | 0.2153 |
| IDFSKLTSLNVK                          | 1365.6             | 2            | 3.8947 | 0.3228 |
| IDFSSIAVPGTSSPR                       | 1534.7             | 2            | 4.4667 | 0.4111 |
| IDFYFDENPYFENK                        | 1842.0             | 2            | 5.287  | 0.415  |
| IDFYFDENPYFENKVLKSFHLNESGDPSSK        | 3698.0             | 3            | 3.5862 | 0.1349 |
| IDGATQSSPAEPK                         | 1301.4             | 2            | 3.5657 | 0.2894 |
| IDGDKDGFVTVDELKDWIK                   | 2194.4             | 3            | 5.0416 | 0.3496 |
| IDGITIHQSLAIIIEYLEETRPTPR             | 2767.1             | 3            | 3.4103 | 0.3207 |
| IDGNLVVRPYTPISSDDDKGFVDLVIK           | 2977.4             | 3            | 6.1011 | 0.4415 |
| IDHQGKLPVLLLGR                        | 1559.9             | 2            | 4.0689 | 0.2901 |
| IDIDPEETVK                            | 1159.3             | 2            | 2.8379 | 0.1213 |

| Peptide Sequence                         | Peptide mass (m/z) | Charge State | Xcorr  | DelCn2 |
|------------------------------------------|--------------------|--------------|--------|--------|
| IDIIPNPQER                               | 1195.4             | 2            | 2.5226 | 0.1071 |
| IDILVNNGGMSQR                            | 1417.6             | 2            | 3.0979 | 0.2155 |
| IDINMSGFNETDDLKR                         | 1869.0             | 2            | 3.3735 | 0.3692 |
| IDIPSFDWPIAPFPR                          | 1772.0             | 2            | 3.3692 | 0.3714 |
| IDISNVKIPK                               | 1127.4             | 2            | 3.0296 | 0.2077 |
| IDKAVAFQNPQTHVIENLHAAAYR                 | 2708.0             | 3            | 5.8458 | 0.5102 |
| IDKLMIEMDGTENK                           | 1637.9             | 2            | 4.2782 | 0.2832 |
| IDKTDYMVGSYGPR                           | 1602.8             | 2            | 3.8721 | 0.3689 |
| IDKTDYMVGSYGPRAE EYFLTPVEEAPK            | 3336.7             | 3            | 3.9841 | 0.366  |
| IDLPEYQGEPDEISIQK                        | 1975.1             | 2            | 3.6059 | 0.3183 |
| IDLRPVLGEGVPILASFLR                      | 2066.5             | 3            | 3.7474 | 0.2869 |
| IDLSHVTSK                                | 1000.1             | 2            | 2.4955 | 0.2332 |
| IDMNLTDLLGELQR                           | 1631.9             | 2            | 2.9226 | 0.1566 |
| IDNQSQPLGNKVEMEIVSMLEK                   | 2503.9             | 3            | 4.4603 | 0.2795 |
| IDNSQVESGSLEDDWDFLPPK                    | 2392.5             | 2            | 5.6938 | 0.4482 |
| IDNSQVESGSLEDDWDFLPPKK                   | 2520.7             | 3            | 4.851  | 0.4199 |
| IDQIEDLQDQLEDMMEDANEIQEALSR              | 3193.4             | 3            | 5.0013 | 0.4594 |
| IDQLEGDHQLIQEALIFDNK                     | 2340.6             | 3            | 5.8142 | 0.3896 |
| IDQLEGDHQLIQEALIFDNKHTNYTMEHIR           | 3624.0             | 3            | 5.4981 | 0.3776 |
| IDQLNRELAEQKATEKQHITLALEK                | 2921.3             | 3            | 5.9836 | 0.3534 |
| IDQPKETHSIGRD                            | 1496.6             | 2            | 2.4995 | 0.2591 |
| IDQVNQLLELDHQK                           | 1693.9             | 2            | 3.3321 | 0.2558 |
| IDQVNQLLELDHQKR                          | 1850.1             | 2            | 3.6949 | 0.2757 |
| IDQYQGADAVGLEEK                          | 1636.7             | 2            | 5.1636 | 0.404  |
| IDRLTDEGAVHVNDR                          | 1710.8             | 3            | 3.8993 | 0.2711 |
| IDSDISGTLK                               | 1049.2             | 2            | 2.5399 | 0.1162 |
| IDSEGGVSANHTSR                           | 1430.5             | 2            | 3.7619 | 0.4106 |
| IDSGLYLGSGYFTAQNLR                       | 2089.3             | 2            | 2.8919 | 0.1861 |
| IDSGSEVIVGVNK                            | 1317.5             | 2            | 3.3762 | 0.1685 |
| IDSILEVVQTGR                             | 1330.5             | 2            | 3.8188 | 0.1888 |
| IDSIPHLNNSTPLVDPSVYGYGVQK                | 2715.0             | 3            | 5.6751 | 0.2879 |
| IDSLENDRQQTHMLDVMQDHFSR                  | 2930.2             | 3            | 5.4253 | 0.3692 |
| IDSLSAQLSQLQK                            | 1431.6             | 2            | 4.1692 | 0.1789 |
| IDSRLQYTSIAIEGTK                         | 1812.0             | 2            | 4.2463 | 0.3076 |
| IDSYQEPFTHSAPESIPDTFEDAVNILKPSTIIGVAGAGR | 4245.7             | 3            | 5.3045 | 0.482  |
| IDTIEIITDR                               | 1189.3             | 2            | 4.1275 | 0.3461 |

| Peptide Sequence                         | Peptide mass (m/z) | Charge State | Xcorr  | DelCn2 |
|------------------------------------------|--------------------|--------------|--------|--------|
| IDTRNELESYAYSLK                          | 1803.0             | 2            | 4.1755 | 0.3617 |
| IDTRNELESYAYSLKNQIGDKEK                  | 2716.0             | 3            | 4.899  | 0.2307 |
| IDVSVAAAGHTDR                            | 1241.3             | 2            | 3.0777 | 0.1467 |
| IDVTAPDVSIEEPEGK                         | 1699.8             | 2            | 3.3859 | 0.2882 |
| IDVYHYEVDIKPDK                           | 1734.9             | 3            | 3.2633 | 0.1878 |
| IDYGEYMDKNNVR                            | 1617.8             | 2            | 3.82   | 0.4206 |
| IDYIAGLDSR                               | 1123.2             | 2            | 3.519  | 0.294  |
| IEADSESQEDIIR                            | 1505.6             | 2            | 3.7723 | 0.1301 |
| IEAIVKNYPEGHK                            | 1498.7             | 2            | 4.1202 | 0.2585 |
| IEANEALVK                                | 987.1              | 2            | 3.4027 | 0.2207 |
| IEASKNELHNLLDKPQLQGIPVLVLGNK             | 3082.6             | 3            | 3.9897 | 0.2208 |
| IEASKNELHNLLDKPQLQGIPVLVLGNKR            | 3238.8             | 3            | 4.8813 | 0.3693 |
| IEASLQHEITR                              | 1297.4             | 2            | 3.3747 | 0.2907 |
| IEASRNELHNLLDKPQLQGIPVLVLGNK             | 3110.6             | 3            | 5.9748 | 0.3484 |
| IEASRNELHNLLDKPQLQGIPVLVLGNKR            | 3266.8             | 3            | 5.6622 | 0.2531 |
| IEDGNNFGVAVQEK                           | 1520.6             | 2            | 3.9458 | 0.3774 |
| IEDGVPQHLVLVLGGK                         | 1675.0             | 2            | 3.9335 | 0.3721 |
| IEDPSLLNSR                               | 1144.3             | 2            | 2.4344 | 0.2507 |
| IEDVTPIPSDSTR                            | 1430.5             | 2            | 4.0091 | 0.4052 |
| IEEELGDEAR                               | 1161.2             | 2            | 4.2862 | 0.1304 |
| IEEFVYEKLDLDR                            | 1441.6             | 2            | 3.2052 | 0.3149 |
| IEEGVPQFLVLISSGKSDDEVDDPAVELK            | 3130.4             | 3            | 3.2841 | 0.1617 |
| IEEGVPQFLVLISSGKSDDEVDDPAVELKQFGVAPFTIAR | 4318.8             | 3            | 4.1428 | 0.1988 |
| IEELQLIVNDKSQNLRL                        | 1913.2             | 3            | 3.8406 | 0.1655 |
| IEEVPELPLVVEDKVEGYKK                     | 2314.7             | 2            | 3.8603 | 0.3828 |
| IEFSLPDLEGR                              | 1276.4             | 2            | 3.0475 | 0.1559 |
| IEGDPQGVQQAK                             | 1270.4             | 2            | 3.1239 | 0.2689 |
| IEGDPQGVQQAKR                            | 1426.6             | 2            | 3.4758 | 0.4146 |
| IEEGSVLQAK                               | 1131.3             | 2            | 3.1606 | 0.3204 |
| IEGLDIHFHVKPPQLPAGHTPK                   | 2546.0             | 3            | 4.4223 | 0.3653 |
| IEGSNKVPVDPATYGFYGGDSYIILYNYR            | 3401.7             | 3            | 3.6615 | 0.3105 |
| IEIESFYEGEDFSETLRL                       | 2166.3             | 2            | 5.9108 | 0.5924 |
| IEIKLSDIPEGK                             | 1342.6             | 2            | 3.4796 | 0.1602 |
| IEINFPAEYPFKPPK                          | 1791.1             | 2            | 3.8951 | 0.2131 |
| IEIPVTPTGQSVSPSSSIPGTPTLK                | 2504.9             | 3            | 3.6585 | 0.1079 |
| IEIQNIFEEAQLSLVR                         | 1790.0             | 2            | 4.8407 | 0.3717 |

| Peptide Sequence                        | Peptide mass (m/z) | Charge State | Xcorr  | DelCn2 |
|-----------------------------------------|--------------------|--------------|--------|--------|
| IEKDTEGHLVR                             | 1297.4             | 2            | 3.3968 | 0.2483 |
| IEKLEEYITTSK                            | 1454.6             | 2            | 4.443  | 0.2135 |
| IEKVEHSDLSFSK                           | 1519.7             | 2            | 4.8553 | 0.4109 |
| IELDKSARHLYICDYHKNLIQSVR                | 2916.4             | 3            | 3.4074 | 0.1613 |
| IELLGSYDPQK                             | 1263.4             | 2            | 2.844  | 0.1056 |
| IELSVWKDDLTTTHAVDAVVNAANEDLLHGGGLALALVK | 3970.5             | 3            | 6.6329 | 0.5394 |
| IENELKEINTNQEALKR                       | 2043.3             | 2            | 6.0218 | 0.3382 |
| IENFKSGVDADSSYFK                        | 1807.9             | 2            | 4.2239 | 0.3381 |
| IENHEGVR                                | 954.0              | 1            | 2.3214 | 0.1342 |
| IENLSNLHQLQMLELGSNR                     | 2210.5             | 3            | 5.3399 | 0.2953 |
| IENVVLVVPVK                             | 1209.5             | 2            | 3.5352 | 0.2147 |
| IEPADAHVLQK                             | 1221.4             | 2            | 2.8518 | 0.266  |
| IEPELDGSAQVTSHDASTNGLINFIK              | 2758.0             | 3            | 3.8593 | 0.3558 |
| IEQLSPFPFDLLLK                          | 1661.0             | 2            | 4.4505 | 0.2911 |
| IEQSQHLLFQAHK                           | 1466.6             | 2            | 3.411  | 0.2518 |
| IEQSQHLLFQAHKKEK                        | 1723.9             | 2            | 3.5184 | 0.3909 |
| IEREKEELMER                             | 1462.7             | 2            | 2.9767 | 0.2069 |
| IESDVQEPTPEDDLDMILGNK                   | 2488.7             | 3            | 3.4111 | 0.1135 |
| IESEKGDAFPVAGQK                         | 1704.9             | 2            | 4.8837 | 0.3853 |
| IESILMSLPLTAR                           | 1444.8             | 2            | 3.6276 | 0.2065 |
| IESLSSQLSNLQK                           | 1447.6             | 2            | 4.4275 | 0.3125 |
| IESPEEISLLPK                            | 1355.6             | 2            | 3.3314 | 0.1933 |
| IESVLSSSGK                              | 1007.1             | 2            | 3.08   | 0.197  |
| IESVLSSSGKR                             | 1163.3             | 2            | 3.2753 | 0.2852 |
| IETMLGDVAVAVHPK                         | 1580.9             | 2            | 2.4837 | 0.2201 |
| IETNENNLESAK                            | 1362.4             | 2            | 3.6486 | 0.3361 |
| IETRDGKLVSESSDVLPK                      | 1974.2             | 3            | 3.7463 | 0.1388 |
| IEVEKPFIAIK                             | 1245.5             | 2            | 3.5185 | 0.2374 |
| IEVIEIMTDR                              | 1219.4             | 2            | 3.7707 | 0.314  |
| IEVIKPGDLGVDLTSK                        | 1685.0             | 2            | 4.6163 | 0.3782 |
| IEVQDTSGGTTALRPSASTQALSSSVSSSK          | 2954.2             | 3            | 6.0805 | 0.4387 |
| IEWLESHQDADIEDFK                        | 1976.1             | 2            | 5.7256 | 0.409  |
| IEWLESHQDADIEDFKAK                      | 2175.3             | 2            | 5.5582 | 0.4306 |
| IEYAKPTR                                | 978.1              | 2            | 2.6801 | 0.1842 |
| IEYDAYRTDLEELNLGPR                      | 2168.3             | 3            | 4.769  | 0.3674 |
| IEYDTFGELKVPNDKYYGAQTVR                 | 2708.0             | 3            | 4.9641 | 0.3674 |



| Peptide Sequence                      | Peptide mass (m/z) | Charge State | Xcorr  | DelCn2 |
|---------------------------------------|--------------------|--------------|--------|--------|
| IEYQFFEDR                             | 1247.3             | 2            | 2.7249 | 0.2431 |
| IFAPNHVVAK                            | 1096.3             | 2            | 2.624  | 0.1836 |
| IFAQDGEGQR                            | 1121.2             | 2            | 3.3077 | 0.2792 |
| IFAQLDSIIDDR                          | 1406.6             | 2            | 2.954  | 0.2034 |
| IFAYYDVSK                             | 1106.3             | 2            | 2.6641 | 0.2583 |
| IFCCHGGLSPDLQSMEQIR                   | 2135.5             | 3            | 3.8771 | 0.1272 |
| IFCCHGGLSPDLQSMEQIRR                  | 2291.7             | 3            | 3.2019 | 0.1235 |
| IFDAAKAPIQWEER                        | 1674.9             | 3            | 3.9634 | 0.3342 |
| IFDAAKAPIQWEERNVTAIQGGGK              | 2698.0             | 3            | 3.558  | 0.1913 |
| IFDANTKPNLNLQVLSNPEFLAEGTAIK          | 3059.5             | 3            | 5.6671 | 0.3047 |
| IFDANTKPNLNLQVLSNPEFLAEGTAIKDLK       | 3415.9             | 3            | 6.2736 | 0.4324 |
| IFDANTKPNLNLQVLSNPEFLAEGTAIKDLKNPDR   | 3898.4             | 3            | 6.1157 | 0.4829 |
| IFDAVGFTFPNR                          | 1384.6             | 2            | 3.4869 | 0.3525 |
| IFDDVSSGVSQLASK                       | 1553.7             | 2            | 3.9304 | 0.3433 |
| IFDEAKTAQEKDSLITPHVSR                 | 2386.6             | 3            | 5.618  | 0.3813 |
| IFDIDEAEEGVKDLKIESDVQEPTEPEDDLDIMLGNK | 4191.5             | 3            | 4.9457 | 0.2247 |
| IFDSPEELPKER                          | 1460.6             | 2            | 2.5737 | 0.2114 |
| IFEAFKLTDDVKK                         | 1554.8             | 2            | 3.817  | 0.2856 |
| IFEEDPAVGAIVLTGGDK                    | 1832.0             | 2            | 5.135  | 0.3892 |
| IFFAGTETATK                           | 1186.3             | 2            | 3.249  | 0.2712 |
| IFGGLDMLAEK                           | 1194.4             | 2            | 2.7178 | 0.1518 |
| IFGGLDMLAEKLPNLTHLNLSGNK              | 2597.0             | 3            | 5.4102 | 0.3058 |
| IFGGVQQLR                             | 1018.2             | 2            | 2.8028 | 0.1535 |
| IFGLLMGTLQK                           | 1221.5             | 2            | 3.4379 | 0.2656 |
| IFGVTTLDIVR                           | 1234.5             | 2            | 3.8813 | 0.2866 |
| IFGYPVGIVGNGVLFSESAK                  | 2169.5             | 2            | 4.8887 | 0.5042 |
| IFHELTQTDKALFNR                       | 1834.1             | 2            | 4.5759 | 0.4859 |
| IFHERFPFEIVK                          | 1562.8             | 2            | 3.2201 | 0.1976 |
| IFHERFPFELVK                          | 1562.8             | 2            | 3.3886 | 0.2427 |
| IFHIDTNALHVPR                         | 1533.8             | 2            | 3.5198 | 0.3521 |
| IFHTVTTTDDPVIR                        | 1615.8             | 3            | 4.3655 | 0.3858 |
| IFHTVTTTDDPVIRK                       | 1744.0             | 2            | 4.8345 | 0.3175 |
| IFHVNWFR                              | 1119.3             | 2            | 2.5859 | 0.2686 |
| IFILGPSHHVPLSR                        | 1573.9             | 3            | 3.5986 | 0.3325 |
| IFINNEWHDSVSGK                        | 1646.8             | 2            | 4.9168 | 0.4536 |
| IFINNEWHDSVSGKK                       | 1775.0             | 2            | 5.0558 | 0.4224 |

| Peptide Sequence                 | Peptide mass (m/z) | Charge State | Xcorr  | DelCn2 |
|----------------------------------|--------------------|--------------|--------|--------|
| IFLLGLADNEAAIVQAESEETKER         | 2647.9             | 3            | 4.519  | 0.2565 |
| IFLLTNNNLLLADQK                  | 1731.0             | 2            | 5.7573 | 0.3636 |
| IFLLTNNNLLLADQKSGQIKSEVPLVDVTK   | 3312.8             | 3            | 4.9604 | 0.4031 |
| IFLQDIKKPDCDDWESGLNAMECALHLEK    | 3363.8             | 3            | 5.1807 | 0.2373 |
| IFLQDIKKPDCDDWESGLNVMCALHLEK     | 3391.9             | 3            | 3.983  | 0.1855 |
| IFNITDNAAIKPGTPLYAAHFRPGQYVDVTAK | 3491.0             | 3            | 5.0983 | 0.2886 |
| IFNLYPR                          | 923.1              | 2            | 2.7254 | 0.1023 |
| IFNTNNLWISLAAVK                  | 1705.0             | 2            | 2.6656 | 0.1721 |
| IFPYEMLMVTNR                     | 1514.8             | 2            | 3.4528 | 0.2203 |
| IFQGNVHNFEK                      | 1333.5             | 2            | 3.7697 | 0.2176 |
| IFQKGESPVVDYDGGR                 | 1668.8             | 2            | 4.5683 | 0.4052 |
| IFQNAPTDPTQDFSTQVAK              | 2109.3             | 2            | 5.406  | 0.4719 |
| IFQTLNGAVDEVVLKFENGK             | 2222.5             | 3            | 3.5419 | 0.2624 |
| IFQVAQELSGEDMHQFHR               | 2173.4             | 3            | 5.2394 | 0.4308 |
| IFRDGEEAGAYDGPR                  | 1653.7             | 3            | 4.8349 | 0.3955 |
| IFSGPSSEQFGYAVQQFINPK            | 2345.6             | 2            | 5.4143 | 0.3622 |
| IFSGSSHQDLSQK                    | 1434.5             | 2            | 4.2037 | 0.2705 |
| IFSGSSHQDLSQKIADRLGLELGK         | 2600.9             | 3            | 4.3518 | 0.3664 |
| IFSPNVVNLTLVDLPGMTK              | 2059.5             | 2            | 3.1315 | 0.2103 |
| IFSQHLQNR                        | 1143.3             | 2            | 2.7092 | 0.173  |
| IFTASNVSSVPLPAENVITAGQR          | 2473.8             | 3            | 4.7866 | 0.4983 |
| IFTLNLSAPFISQFYK                 | 1890.2             | 2            | 3.7742 | 0.2231 |
| IFTNLYGR                         | 984.1              | 2            | 2.505  | 0.1461 |
| IFTPLLHQIELEKPKPIPIYIGSR         | 2854.4             | 3            | 4.3205 | 0.3758 |
| IFTSIGEDYDER                     | 1445.5             | 2            | 4.1634 | 0.3968 |
| IFTSIGEDYDERVLPSITTEILK          | 2641.0             | 3            | 5.1334 | 0.2996 |
| IFTSIGEDYDERVLPSITTEILKSVVAR     | 3153.6             | 3            | 6.0645 | 0.4391 |
| IFVEESYDEFVR                     | 1646.8             | 2            | 5.2368 | 0.5038 |
| IFVEESYDEFVRR                    | 1803.0             | 2            | 2.9387 | 0.1608 |
| IFVGGIKEDTEEHHLR                 | 1881.1             | 2            | 4.9613 | 0.3123 |
| IFVGGIKEDTEEHHLRDYFEQYGK         | 2912.2             | 3            | 4.4273 | 0.253  |
| IFVGGIKEDTEEYNLR                 | 1884.1             | 2            | 5.2744 | 0.4501 |
| IFVGGIKEDTEEYNLRDYFEK            | 2566.8             | 3            | 4.4512 | 0.2697 |
| IFVGGIKEDTEEYNLRDYFEKYGK         | 2915.2             | 3            | 5.143  | 0.3595 |
| IFVGGIKEDTKEHHLR                 | 1880.1             | 3            | 3.451  | 0.3758 |
| IFVGGNPEATEEK                    | 1504.7             | 2            | 4.66   | 0.3202 |

| Peptide Sequence                       | Peptide mass (m/z) | Charge State | Xcorr  | DelCn2 |
|----------------------------------------|--------------------|--------------|--------|--------|
| IFVGGLSANTVVEDVKQYFEQFGKVEDAMLMFDKTTNR | 4329.9             | 3            | 3.6885 | 0.195  |
| IFVGGLSPDTPEEK                         | 1489.7             | 2            | 4.2499 | 0.3698 |
| IFVGGLSPDTPEEKIR                       | 1759.0             | 2            | 4.0746 | 0.2778 |
| IFVNDDRHVMAK                           | 1445.7             | 2            | 3.812  | 0.3253 |
| IFYPEIEEVQALDDTER                      | 2068.2             | 2            | 4.0867 | 0.378  |
| IFYPETTDIYDRK                          | 1661.8             | 2            | 3.414  | 0.3239 |
| IGAADYQPTEQDILR                        | 1690.8             | 2            | 4.5137 | 0.4412 |
| IGACPSAHKPLLGTEK                       | 1622.9             | 2            | 3.9603 | 0.4069 |
| IGADFLAR                               | 863.0              | 2            | 2.8957 | 0.1976 |
| IGAEVYHNLK                             | 1144.3             | 2            | 3.6783 | 0.2474 |
| IGAEVYHNLKNVIK                         | 1598.9             | 3            | 4.4788 | 0.3679 |
| IGAEVYHNLKNVIKEK                       | 1856.2             | 2            | 5.1858 | 0.3797 |
| IGAHGKPVIFLHPK                         | 1514.8             | 2            | 2.9926 | 0.2459 |
| IGALQGAVDR                             | 1000.1             | 2            | 2.9645 | 0.2411 |
| IGASFLQR                               | 892.0              | 2            | 2.941  | 0.202  |
| IGASTLLSDIER                           | 1275.4             | 2            | 3.7543 | 0.378  |
| IGDEDVGR                               | 860.9              | 2            | 2.9962 | 0.1804 |
| IGDEDVGRVIFGLFGK                       | 1723.0             | 2            | 4.7008 | 0.3594 |
| IGDEDVGRVIFGLFGKTVPK                   | 2148.5             | 3            | 4.6918 | 0.2821 |
| IGDELDSNMELQR                          | 1520.6             | 2            | 4.5268 | 0.3122 |
| IGDEYFTFITDCKDPKACTILLR                | 2664.1             | 3            | 3.673  | 0.154  |
| IGDFIDVSEGPLIPR                        | 1628.9             | 2            | 4.1634 | 0.4828 |
| IGDLHPQIVNLLK                          | 1460.7             | 2            | 2.7351 | 0.1929 |
| IGDLQAFQGHGAGNLAGLK                    | 1868.1             | 2            | 4.8108 | 0.4082 |
| IGDNLDILTLLK                           | 1328.6             | 2            | 4.2835 | 0.2596 |
| IGDPILLEDTR                            | 1129.2             | 2            | 3.8743 | 0.3201 |
| IGDQEFDSLPALEFYK                       | 1986.2             | 2            | 4.555  | 0.4307 |
| IGDSLFGAR                              | 936.0              | 2            | 2.4782 | 0.2096 |
| IGDSSQGDNNLQK                          | 1376.4             | 2            | 3.9317 | 0.3511 |
| IGDYVQQHGGVSLVEQLLQDPK                 | 2424.7             | 3            | 3.5741 | 0.1093 |
| IGEAEEAAVIEAMGKAEER                    | 1946.2             | 3            | 3.7151 | 0.2237 |
| IGEEQSAEDAEDGPPPELLFIHGGHTAK           | 2849.0             | 3            | 4.947  | 0.4171 |
| IGEEQSPEDAEDGPPPELLFIHGGHTAK           | 2875.1             | 3            | 5.2889 | 0.4571 |
| IGEHMEEHGK                             | 1280.4             | 2            | 3.2528 | 0.3242 |
| IGEHTPSALAIMENANVLAR                   | 2108.4             | 3            | 5.8284 | 0.5519 |
| IGEIATGSPVSTELGHVLEISSTHKK             | 2805.2             | 3            | 4.1183 | 0.3345 |

| Peptide Sequence                     | Peptide mass (m/z) | Charge State | Xcorr  | DelCn2 |
|--------------------------------------|--------------------|--------------|--------|--------|
| IGEKYVDMSVK                          | 1269.5             | 2            | 2.9205 | 0.1731 |
| IGEKYVDMSVTK                         | 1498.8             | 2            | 3.4466 | 0.1959 |
| IGELVGVLVNHFK                        | 1425.7             | 2            | 3.2751 | 0.2683 |
| IGEMPLTDSILCDGLTDAFHNCHMGITAENVAK    | 3519.0             | 3            | 4.7602 | 0.3113 |
| IGEWELIQESGVPLKPLFGPGYTGIR           | 2858.3             | 3            | 5.0406 | 0.4046 |
| IGFDAIMR                             | 923.1              | 2            | 2.8198 | 0.1898 |
| IGFEEKDIAANEENRK                     | 1864.0             | 2            | 4.6726 | 0.2883 |
| IGFGSFVEK                            | 984.1              | 2            | 2.5762 | 0.2638 |
| IGFPWSEIR                            | 1105.3             | 2            | 3.1755 | 0.3397 |
| IGGDAATTVNNSTPDFGFGGQK               | 2155.3             | 2            | 5.6233 | 0.5243 |
| IGGDAATTVNNSTPDFGFGQKR               | 2311.5             | 3            | 3.2068 | 0.1381 |
| IGGDAGTSLNSNDYGYGGQK                 | 1975.0             | 2            | 5.1594 | 0.4729 |
| IGGDSGLSSR                           | 949.0              | 2            | 2.68   | 0.2357 |
| IGGDSGLSVR                           | 961.1              | 2            | 3.2914 | 0.2261 |
| IGGGIDVPVPR                          | 1080.3             | 2            | 4.2379 | 0.2748 |
| IGGIFAFK                             | 853.0              | 2            | 3.0846 | 0.2128 |
| IGGIGTVPVGR                          | 1026.2             | 2            | 3.8703 | 0.3425 |
| IGGIGTVPVGRVETGILRPGMVVTFAPVNITTEVK  | 3580.2             | 3            | 3.3038 | 0.137  |
| IGGIGTVPVGRVETGVLKPGMVVTFAPVNVTTTEVK | 3524.2             | 3            | 6.1509 | 0.2634 |
| IGGILANELSVDEAALHAAVIAINEAIDR        | 2960.3             | 3            | 5.5879 | 0.5295 |
| IGGILANELSVDEAALHAAVIAINEAIDRR       | 3116.5             | 3            | 3.825  | 0.2604 |
| IGGILANELSVDEAALHAAVIAINEAVEK        | 2932.3             | 3            | 5.9317 | 0.4737 |
| IGGNEGIDVPIPR                        | 1337.5             | 2            | 3.5854 | 0.3379 |
| IGGSTDTGKHIK                         | 1214.4             | 2            | 2.7223 | 0.19   |
| IGGVQQDTILAEGLHFR                    | 1855.1             | 3            | 5.1393 | 0.4988 |
| IGGVTERMPTPVIK                       | 1498.8             | 2            | 3.1089 | 0.1845 |
| IGHFQLMQGK                           | 1159.4             | 2            | 3.1276 | 0.2453 |
| IGHHSTSDSSAYR                        | 1533.5             | 2            | 3.4012 | 0.3858 |
| IGHIAHLNLR                           | 1144.4             | 2            | 2.7375 | 0.4178 |
| IGHKVESESYR                          | 1305.4             | 2            | 2.7232 | 0.2442 |
| IGHPAPNFK                            | 981.1              | 1            | 2.4787 | 0.319  |
| IGHYILGDTLGVGTFGK                    | 1749.0             | 3            | 4.4609 | 0.441  |
| IGIEIIKR                             | 942.2              | 2            | 2.5496 | 0.1163 |
| IGIFGQDEDVTSK                        | 1409.5             | 2            | 3.6592 | 0.3778 |
| IGIFPPAISISSIPLLPSSVR                | 2165.6             | 2            | 3.4717 | 0.3786 |
| IGIIDGEYVVNPTRK                      | 1674.9             | 2            | 3.6889 | 0.3252 |

| Peptide Sequence                            | Peptide mass ( <i>m/z</i> ) | Charge State | Xcorr  | DelCn2 |
|---------------------------------------------|-----------------------------|--------------|--------|--------|
| IGIIGGTGLDDPEILEGR                          | 1826.0                      | 2            | 5.1916 | 0.4711 |
| IGILHENFQTLK                                | 1413.6                      | 2            | 2.5555 | 0.1829 |
| IGILHENFQTLKAEDNFEDIITKPPVR                 | 3139.6                      | 3            | 5.1772 | 0.3744 |
| IGIMPGHIHK                                  | 1103.4                      | 2            | 2.405  | 0.1321 |
| IGITNHDEYSLVR                               | 1517.7                      | 2            | 3.9333 | 0.3441 |
| IGIVGLPNVGK                                 | 1067.3                      | 2            | 3.3952 | 0.2967 |
| IGKEMQNA                                    | 891.0                       | 2            | 2.7343 | 0.1052 |
| IGKENFIEK                                   | 1078.2                      | 2            | 2.5672 | 0.1499 |
| IGKIEGFVVK                                  | 1233.5                      | 2            | 2.5223 | 0.1533 |
| IGKIEGFVVKK                                 | 1361.7                      | 3            | 4.075  | 0.2308 |
| IGKPAPDFK                                   | 973.2                       | 1            | 2.4085 | 0.3315 |
| IGKPAPDFKATAVVDGAFKEVK                      | 2289.7                      | 3            | 5.3869 | 0.5284 |
| IGKPHTVPCK                                  | 1080.3                      | 2            | 2.4626 | 0.1867 |
| IGKVDCTQHYELCSGNQVR                         | 2151.4                      | 2            | 2.6595 | 0.1038 |
| IGKVTSEELHYFVQNHFTSAR                       | 2464.7                      | 3            | 5.8506 | 0.4457 |
| IGLDDEEKLDLFR                               | 1563.7                      | 2            | 3.3061 | 0.2793 |
| IGLENFLLR                                   | 1075.3                      | 2            | 3.3059 | 0.1703 |
| IGLFGGAGVGK                                 | 976.2                       | 2            | 3.2449 | 0.173  |
| IGLFGGAGVGKTVLIMELINNVAK                    | 2415.9                      | 3            | 4.2579 | 0.1905 |
| IGLFYMDNDLITR                               | 1571.8                      | 2            | 2.7177 | 0.1339 |
| IGLIHGHQVIPWGDMAASLALLQR                    | 2527.0                      | 3            | 4.8119 | 0.3302 |
| IGLINDMVR                                   | 1031.3                      | 2            | 2.6045 | 0.1182 |
| IGLIQFCLSAPK                                | 1290.6                      | 2            | 3.6144 | 0.3184 |
| IGLPHSIK                                    | 865.1                       | 2            | 2.5052 | 0.1023 |
| IGMSVNAIR                                   | 961.2                       | 2            | 2.4618 | 0.1639 |
| IGNEGLAADLTDDPDTEEALKEFDLVTAEDEGEGAGEAR     | 4083.2                      | 3            | 5.3621 | 0.391  |
| IGNFIVKKPMLVGLGHEASGTVEK                    | 2355.8                      | 3            | 5.916  | 0.4015 |
| IGNLQTDLSDGLR                               | 1402.5                      | 2            | 3.4665 | 0.2849 |
| IGNSGVEEIKGHPFFEGVDWEHIR                    | 2754.0                      | 3            | 3.7084 | 0.3553 |
| IGNTGGMLDNILASK                             | 1504.7                      | 2            | 5.0243 | 0.4823 |
| IGPALSCGNTVVVKPAEQTPLTALHVASLIK             | 3129.7                      | 3            | 5.7616 | 0.5164 |
| IGPEKIDTLGIYGK                              | 1504.8                      | 2            | 2.6155 | 0.2537 |
| IGPIATPDYIQNAPGLPK                          | 1866.2                      | 3            | 4.0656 | 0.3858 |
| IGPILDNSTLQSEVKPILEK                        | 2195.5                      | 2            | 5.5909 | 0.4728 |
| IGPILDNSTLQSEVKPILEKLTQDQDQDVK              | 3337.8                      | 3            | 5.541  | 0.4171 |
| IGPILDNSTLQSEVKPILEKLTQDQDQDVKYFAQEALTVLSLA | 4745.4                      | 3            | 4.3932 | 0.2011 |

| Peptide Sequence                    | Peptide mass (m/z) | Charge State | Xcorr  | DelCn2 |
|-------------------------------------|--------------------|--------------|--------|--------|
| IGPITPLEFYR                         | 1306.5             | 2            | 3.6653 | 0.34   |
| IGPKKPLPDHVSIVEPKDEILPTTPISEQK      | 3307.8             | 3            | 6.5396 | 0.4764 |
| IGPLGLSPK                           | 882.1              | 2            | 2.7817 | 0.3288 |
| IGPQHQAGSDSLLTGMAFFK                | 2106.4             | 2            | 3.3351 | 0.3056 |
| IGPSILNSDLANLGAECLR                 | 1957.2             | 2            | 2.675  | 0.2931 |
| IGPYQPNVPVGDYVIPK                   | 1970.3             | 3            | 5.1254 | 0.4185 |
| IGQETDKTTTR                         | 1250.3             | 2            | 3.3617 | 0.3722 |
| IGQFVFAR                            | 938.1              | 2            | 2.8661 | 0.3481 |
| IGQGYLIKDGK                         | 1192.4             | 2            | 3.1927 | 0.2122 |
| IGQLEEQLEQEAKEAK                    | 1515.6             | 2            | 3.7214 | 0.2475 |
| IGQPTLLLYVDAGPETMTQR                | 2204.5             | 2            | 5.5492 | 0.5031 |
| IGQQPQQPGAPPQQDYTK                  | 1982.1             | 2            | 4.5729 | 0.3506 |
| IGQSLSSLTSPAEEQGVLSEKIDSLQAR        | 2816.1             | 3            | 3.7629 | 0.2738 |
| IGRIEDVTPIPSDSTR                    | 1756.9             | 3            | 3.4784 | 0.1966 |
| IGRIEDVTPIPSDSTRR                   | 1913.1             | 2            | 3.4433 | 0.3    |
| IGRLEKELENANDLLSATK                 | 2115.4             | 2            | 3.7463 | 0.4188 |
| IGSDVELLLR                          | 1115.3             | 2            | 3.4023 | 0.2304 |
| IGSEGQGFLIAVR                       | 1347.5             | 2            | 3.5783 | 0.2214 |
| IGSFTIQNVFPQSDGDSSK                 | 2028.2             | 2            | 3.2238 | 0.315  |
| IGSLASGNVR                          | 974.1              | 2            | 2.7829 | 0.1374 |
| IGSLDNITHVPGGGNK                    | 1579.7             | 2            | 4.009  | 0.3329 |
| IGSTDNIKYQPK                        | 1364.5             | 2            | 3.6446 | 0.2161 |
| IGSTIDDTISK                         | 1150.3             | 2            | 2.9542 | 0.2896 |
| IGSTIFGER                           | 980.1              | 2            | 2.4391 | 0.2862 |
| IGTADRELIQTSALNFLTPLR               | 2330.7             | 2            | 3.996  | 0.3117 |
| IGTDIQDNK                           | 1004.1             | 2            | 2.6978 | 0.1398 |
| IGTHNGTFHCDEALACALLR                | 2143.4             | 3            | 3.6361 | 0.2908 |
| IGTIYEGASNIQLNTIAK                  | 1907.2             | 3            | 5.6441 | 0.3396 |
| IGTLEKEHNVFQNK                      | 1657.9             | 2            | 3.983  | 0.3312 |
| IGVADVMSR                           | 1063.2             | 2            | 3.0528 | 0.3019 |
| IGVDHVAR                            | 867.0              | 2            | 2.9309 | 0.3077 |
| IGVFSYGSGLAATLYSLK                  | 1848.1             | 2            | 3.1398 | 0.337  |
| IGVHAFQQR                           | 1056.2             | 2            | 2.6445 | 0.378  |
| IGVLDEGKMK                          | 1090.3             | 2            | 2.5277 | 0.191  |
| IGYNPDTVAFVPISGWNGDNMLEPSANMPWFK    | 3570.0             | 3            | 4.0107 | 0.2326 |
| IGYNPDTVAFVPISGWNGDNMLEPSANMPWFKGWK | 3941.4             | 3            | 5.1919 | 0.1913 |

| Peptide Sequence             | Peptide mass (m/z) | Charge State | Xcorr  | DelCn2 |
|------------------------------|--------------------|--------------|--------|--------|
| IGYPKPALLHSTFFPALQGAQTK      | 2486.9             | 3            | 5.4614 | 0.5002 |
| IGYSSPLTSLDQSSK              | 1583.7             | 2            | 3.2029 | 0.2174 |
| IGYSSPQTLADQSSK              | 1582.7             | 2            | 2.5033 | 0.1557 |
| IHAEEKLDKANEEIAQVR           | 2094.3             | 2            | 6.3226 | 0.488  |
| IHAEEKPFTCEECGKIITSSSNVAKHK  | 2988.4             | 3            | 3.2628 | 0.123  |
| IHAGPITK                     | 837.0              | 1            | 2.4793 | 0.2012 |
| IHAGPK                       | 622.7              | 1            | 1.8115 | 0.1191 |
| IHDPQLLTER                   | 1222.4             | 2            | 2.4166 | 0.2782 |
| IHEAAVQELR                   | 1166.3             | 2            | 3.2713 | 0.3203 |
| IHEGCEEPATHNALAK             | 1720.9             | 2            | 4.8386 | 0.4584 |
| IHEISCGAHSTQCIPVSWR          | 2125.4             | 2            | 3.023  | 0.1048 |
| IHEMLQPGQDQ                  | 1296.4             | 2            | 3.6421 | 0.2536 |
| IHETNLKK                     | 983.1              | 1            | 2.224  | 0.1188 |
| IHETNLKKQGLLPLTFADPADYNK     | 2728.1             | 3            | 3.5889 | 0.2756 |
| IHFFLSK                      | 892.1              | 2            | 2.4362 | 0.1912 |
| IHFHNLQGEK                   | 1223.4             | 3            | 3.9449 | 0.2598 |
| IHFNPPLPMMR                  | 1353.7             | 2            | 2.4512 | 0.2228 |
| IHFPEALGHVALR                | 1460.7             | 2            | 3.3755 | 0.4221 |
| IHFPLATYAPVISA EK            | 1758.1             | 2            | 4.4993 | 0.5152 |
| IHFRPELPAER                  | 1365.6             | 2            | 3.1334 | 0.2866 |
| IHFSGYDNDRPGNLVYR            | 2024.2             | 2            | 4.45   | 0.4358 |
| IHGFTVNQVTSVPELFLTAVK        | 2301.7             | 2            | 2.9694 | 0.2523 |
| IHGSGHVEEPASPLAAYQK          | 1992.2             | 3            | 5.3867 | 0.5356 |
| IHGVGFK                      | 757.9              | 1            | 2.5427 | 0.1449 |
| IHHATPPQAQPEVK               | 1553.7             | 2            | 2.8001 | 0.1945 |
| IHHDVNELLSLLR                | 1559.8             | 2            | 3.4839 | 0.288  |
| IHIMPSLNPDGFEK               | 1598.8             | 2            | 3.8991 | 0.2939 |
| IHIMPSLNPDGFEKAASQPGELKDFVGR | 3241.7             | 3            | 3.4446 | 0.405  |
| IHIPFISK                     | 955.2              | 2            | 2.8456 | 0.1442 |
| IHLAVTEMASLFPK               | 1557.9             | 2            | 2.5309 | 0.1979 |
| IHLDEKSFR                    | 1145.3             | 2            | 2.6238 | 0.2482 |
| IHLFDIDVPGKITFQESK           | 2088.4             | 2            | 2.6618 | 0.1166 |
| IHLNSQFPQTQR                 | 1398.6             | 2            | 2.6244 | 0.1822 |
| IHLPETVEQLRK                 | 1463.7             | 2            | 2.5316 | 0.1115 |
| IHMGS CAENTAK                | 1262.4             | 2            | 2.6037 | 0.2376 |
| IHMVYSK                      | 878.1              | 1            | 2.1544 | 0.1898 |

| Peptide Sequence                   | Peptide mass (m/z) | Charge State | Xcorr  | DelCn2 |
|------------------------------------|--------------------|--------------|--------|--------|
| IHNAENIQPGEQK                      | 1478.6             | 2            | 4.1084 | 0.1386 |
| IHNFGLIQEK                         | 1199.4             | 2            | 2.5048 | 0.167  |
| IHNGESMAYLFR                       | 1438.6             | 2            | 2.9156 | 0.2158 |
| IHNGESMSYLFR                       | 1454.6             | 2            | 3.3307 | 0.3518 |
| IHNHLPEIQK                         | 1229.4             | 2            | 2.8356 | 0.1452 |
| IHNIDIPTTQQVPHIEALLKR              | 2437.8             | 3            | 3.2175 | 0.1591 |
| IHNLALNCCTQLADLYR                  | 1962.3             | 2            | 3.0928 | 0.197  |
| IHNLTAYLQTLHR                      | 1580.8             | 2            | 4.5561 | 0.4424 |
| IHNNMFDPALIGDKPK                   | 1811.1             | 3            | 3.4641 | 0.1869 |
| IHPQTIIAGWR                        | 1292.5             | 2            | 2.8403 | 0.1733 |
| IHPVDKLTIQGLK                      | 1462.8             | 2            | 2.6662 | 0.2211 |
| IHPVDKLTIQGLKDFTPGKPLK             | 2446.9             | 2            | 5.2425 | 0.4496 |
| IHQALKEDILEFIK                     | 1698.0             | 2            | 4.7483 | 0.4204 |
| IHQESELHSYLSR                      | 1599.7             | 2            | 4.2611 | 0.4044 |
| IHQIEYAMEAVK                       | 1432.7             | 2            | 3.6972 | 0.2405 |
| IHQIEYAMEAVKQGSATVGLK              | 2274.6             | 2            | 6.5421 | 0.4899 |
| IHQIGPMVQQIQSVCMECQGHGER           | 2767.2             | 3            | 4.7186 | 0.3063 |
| IHQQELEVGISSHQPSFAALNR             | 2462.7             | 3            | 3.4121 | 0.2347 |
| IHSAPRSGAPAAESKEIVR                | 1977.2             | 3            | 3.4773 | 0.2006 |
| IHSDHLVASEK                        | 1236.4             | 2            | 2.8994 | 0.3199 |
| IHSDTFASGGER                       | 1277.3             | 2            | 2.7994 | 0.2208 |
| IHSEIVK                            | 826.0              | 1            | 2.0187 | 0.1461 |
| IHSEVVEDTEAVSAVQQLLDDER            | 2583.7             | 3            | 3.4823 | 0.1697 |
| IHSINLHNFSNSVLETLNEQR              | 2466.7             | 3            | 4.4662 | 0.3573 |
| IHSITGLPPAMQK                      | 1393.7             | 2            | 2.886  | 0.2547 |
| IHSLSSNKPRPVFTHENIQGGGEPFQALYNYTPR | 3985.4             | 3            | 5.3234 | 0.3947 |
| IHSLTHLDSVTK                       | 1351.5             | 2            | 3.4516 | 0.3299 |
| IHTDFEK                            | 890.0              | 1            | 2.2368 | 0.163  |
| IHTGLSR                            | 783.9              | 1            | 1.9167 | 0.1438 |
| IHTLLKDLQR                         | 1237.5             | 2            | 2.6414 | 0.1988 |
| IHTPMYKGEASYDMR                    | 2042.3             | 2            | 4.5679 | 0.4708 |
| IHVDFPVILYEV                       | 1444.7             | 2            | 2.6109 | 0.1404 |
| IHVFIYIDYGNR                       | 1397.6             | 2            | 3.4141 | 0.3276 |
| IHVFIYIDYGNREVLVLPSTR              | 2180.5             | 3            | 3.9523 | 0.3033 |
| IHVIDHSGAR                         | 1105.2             | 2            | 3.0315 | 0.2954 |
| IHVLEAQDLIAK                       | 1350.6             | 2            | 3.5273 | 0.344  |



| Peptide Sequence                            | Peptide mass (m/z) | Charge State | Xcorr  | DelCn2 |
|---------------------------------------------|--------------------|--------------|--------|--------|
| IHVLEAQDLIAKDR                              | 1621.9             | 2            | 4.82   | 0.365  |
| IHVLPIDDTVEGITGNLFEVYLKPYFLEAYRPIR          | 3993.6             | 3            | 4.803  | 0.495  |
| IHVQSSSDSSDEPAEKR                           | 1872.9             | 3            | 3.4606 | 0.3048 |
| IHVSDQELQSANASVDDSRLEELK                    | 2684.9             | 3            | 5.761  | 0.498  |
| IHVSDQELQSANASVDDSRLEELKATLPSPDKLPGFK       | 4037.4             | 3            | 5.7853 | 0.5249 |
| IHVYGYSMAYGPAQHAISTEK                       | 2324.6             | 2            | 6.8824 | 0.5659 |
| IHVYGYSMAYGPAQHAISTEKIK                     | 2565.9             | 3            | 3.9403 | 0.3121 |
| IHYFDPQYFEFEFEA                             | 1983.1             | 2            | 3.2965 | 0.3494 |
| IHYIGQNEPELLVAHAYTR                         | 2225.5             | 2            | 5.8844 | 0.5005 |
| IHYLDTTTLIEPAPR                             | 1741.0             | 2            | 3.8959 | 0.3997 |
| IIAEGANGPTTPEADKIFLER                       | 2243.5             | 2            | 4.7094 | 0.4543 |
| IIAFVGSPPVEDNEKDLVK                         | 1974.2             | 2            | 4.1186 | 0.2781 |
| IIAGDKEVVIAQNDK                             | 1613.8             | 2            | 3.9013 | 0.2209 |
| IIAGDKEVVIAQNDKHTGPVR                       | 2261.6             | 3            | 5.4497 | 0.4174 |
| IIALDGDTK                                   | 946.1              | 2            | 3.0765 | 0.173  |
| IIALDGDTKNSTFSEIFKK                         | 2128.4             | 2            | 3.3248 | 0.2971 |
| IIAPPERK                                    | 924.1              | 2            | 2.6281 | 0.2422 |
| IIAQKIYGADDIELLPEAQHKAEVYTK                 | 3058.5             | 3            | 3.9573 | 0.2096 |
| IIASSPEMNLPTVSALR                           | 1800.1             | 2            | 3.1589 | 0.211  |
| IIATAVCHTDAYTLGADPEGCFPVILGHEGAGIVESVGEGVTK | 4386.9             | 3            | 4.7462 | 0.3182 |
| IIAVDINKDKFAK                               | 1475.8             | 2            | 4.3717 | 0.3779 |
| IICILSHPIK                                  | 1137.5             | 2            | 2.5525 | 0.1535 |
| IIDDSEITKEDDALWPPPDR                        | 2326.5             | 2            | 2.6456 | 0.214  |
| IIDEVVVKFLDDLGNK                            | 1904.2             | 2            | 3.7735 | 0.3136 |
| IIDFGLAR                                    | 905.1              | 2            | 2.4636 | 0.182  |
| IIDISDVFRNTEIGFLQDALSKPHGTVK                | 3115.5             | 3            | 4.0973 | 0.2995 |
| IIDKNGIHDLDNISFPK                           | 1940.2             | 2            | 5.0769 | 0.4716 |
| IIDKNGIHDLDNISFPKQGS                        | 2212.4             | 3            | 4.6421 | 0.3141 |
| IIDKSKRDPTEEIEILLR                          | 2169.5             | 3            | 4.5689 | 0.2783 |
| IIDSLFNTVTDK                                | 1366.5             | 2            | 2.5657 | 0.1661 |
| IIDSLFNTVTDKK                               | 1494.7             | 2            | 4.0625 | 0.3344 |
| IIDTSLTRDPLVIELGQK                          | 2012.3             | 3            | 5.9855 | 0.3482 |
| IIDVVYNASNELVR                              | 1719.9             | 3            | 5.3817 | 0.4375 |
| IIEDLRAQIFANTVDNAR                          | 2060.3             | 3            | 5.2434 | 0.3875 |
| IIEDQQESLNK                                 | 1317.4             | 2            | 4.5159 | 0.2724 |
| IIEDQQESLNKWK                               | 1631.8             | 2            | 3.7498 | 0.1923 |

| Peptide Sequence                 | Peptide mass (m/z) | Charge State | Xcorr  | DelCn2 |
|----------------------------------|--------------------|--------------|--------|--------|
| IIEPDNSYISDTLGQVYK               | 2056.3             | 2            | 3.7453 | 0.3965 |
| IETLTQQLQAK                      | 1386.6             | 2            | 4.4602 | 0.2474 |
| IIEVVDAIMTTAQSHQR                | 1913.2             | 2            | 2.5563 | 0.1993 |
| IIFEDDR                          | 908.0              | 2            | 2.7917 | 0.1399 |
| IIGAKDHASIQMNVAEVDKVTGR          | 2453.8             | 3            | 3.4847 | 0.1521 |
| IIGATDSSGELMFLMK                 | 1714.0             | 2            | 4.0896 | 0.2912 |
| IIGAVDQIQLTQAQLEER               | 2026.3             | 3            | 5.5359 | 0.4621 |
| IIGFGSALLEEVDPNPANFVGAGIIHTK     | 2881.3             | 3            | 4.015  | 0.2461 |
| IIGLDQVAGMSETALPGAFK             | 2019.4             | 2            | 5.3988 | 0.5456 |
| IIGLKPEGVPR                      | 1179.4             | 2            | 2.5547 | 0.1765 |
| IIGNLLYYR                        | 1125.3             | 2            | 2.9256 | 0.1296 |
| IIGVDINKDK                       | 1115.3             | 2            | 2.8068 | 0.3029 |
| IIGVDINKDKFAR                    | 1489.7             | 2            | 4.168  | 0.3323 |
| IIGYTPDLDPETVDDAFAR              | 2109.3             | 2            | 4.1351 | 0.3963 |
| IIHDFPQFYPLGIVQHD                | 2040.3             | 2            | 4.7975 | 0.3968 |
| IIHEDGFSGEDVK                    | 1446.5             | 2            | 3.887  | 0.4014 |
| IIHEDGFSGEDVKQYKPVVYSNTIQSLAAIVR | 3579.0             | 3            | 5.7808 | 0.433  |
| IIHGQDFDQR                       | 1229.3             | 2            | 2.4856 | 0.1068 |
| IIHTDIKPENILLSVNEQYIR            | 2509.9             | 3            | 4.492  | 0.3709 |
| IIDKEYYYTKEEQFK                  | 2111.4             | 2            | 4.224  | 0.4495 |
| IIITGDEDVDQDQALALAIKEAK          | 2470.8             | 3            | 4.2021 | 0.3497 |
| IIKDFMIQGGDPTGTGR                | 1807.1             | 2            | 4.909  | 0.4656 |
| IIKDGEQHEDLNEVAKLFNIHED          | 2707.9             | 3            | 5.9801 | 0.3889 |
| IIKDHLLEESTFAPYIDDLSEEQR         | 2863.1             | 3            | 5.4297 | 0.4401 |
| IIKPCNHVLSLSFPIR                 | 1838.3             | 2            | 3.6658 | 0.4131 |
| IILDLISESPIK                     | 1341.6             | 2            | 4.3172 | 0.3709 |
| IILDLISESPIKGR                   | 1554.9             | 2            | 4.4515 | 0.3463 |
| IILEAEKMDGAASQGK                 | 1661.9             | 2            | 3.9413 | 0.2195 |
| IILEALR                          | 828.0              | 2            | 2.4316 | 0.1027 |
| IILEALRQAENEPQSAPK               | 2008.3             | 2            | 4.3062 | 0.2591 |
| IILGGFSQGGALSLYTALTTQQK          | 2368.7             | 3            | 3.311  | 0.1074 |
| IILHNTMESLLER                    | 1569.9             | 2            | 3.0035 | 0.3093 |
| IILNALVAQQK                      | 1211.5             | 2            | 3.6895 | 0.2572 |
| IILNSHSPAGSAAISQQDFHPK           | 2319.6             | 3            | 4.3347 | 0.1594 |
| IILPEGAKNIEIDSPYEISR             | 2258.6             | 3            | 4.9418 | 0.3162 |
| IILPPEKELAMPGEDLKFNLILR          | 2651.2             | 3            | 4.371  | 0.2779 |

| Peptide Sequence                          | Peptide mass (m/z) | Charge State | Xcorr  | DelCn2 |
|-------------------------------------------|--------------------|--------------|--------|--------|
| IILWDHDLNPEREIEVPDQYGTIR                  | 2923.2             | 3            | 4.4985 | 0.2253 |
| IIMTSSASGIYGNFGQANYSAAK                   | 2352.6             | 2            | 5.8156 | 0.5633 |
| IINADSEDPK                                | 1102.2             | 2            | 2.491  | 0.2062 |
| IINADSEDPKYIINVK                          | 1833.1             | 2            | 5.7195 | 0.3944 |
| IINDDQSLYADVYLEDGLIK                      | 2298.5             | 2            | 5.2989 | 0.4552 |
| IINDDQSLYADVYLEDGLIKQIGENLIVPGGVK         | 3604.1             | 3            | 6.7399 | 0.5334 |
| IINDLLQSLR                                | 1185.4             | 2            | 4.0645 | 0.2041 |
| IINEPTAAAIAYGLDK                          | 1660.9             | 2            | 5.6694 | 0.3683 |
| IINEPTAAAIAYGLDKK                         | 1789.1             | 2            | 4.6982 | 0.2189 |
| IINEPTAAAIAYGLDKR                         | 1817.1             | 2            | 5.1484 | 0.4013 |
| IINEPTAAAIAYGLDR                          | 1688.9             | 2            | 5.6198 | 0.5394 |
| IINEPTAAAIAYGLDRT                         | 1790.0             | 2            | 5.0853 | 0.4057 |
| IINEVKPTEIYNLGAQSHVK                      | 2254.6             | 3            | 5.155  | 0.2726 |
| IINEVSKPLAHHIPVEK                         | 1925.3             | 2            | 4.2504 | 0.3296 |
| IINNTENLVR                                | 1186.3             | 2            | 2.9055 | 0.185  |
| IIPGFMCQGGDFTR                            | 1542.8             | 2            | 2.8161 | 0.2353 |
| IIPGLEGLQLPSPTATSQLPLESDAVECLNYQHVK       | 4000.5             | 3            | 4.2259 | 0.2624 |
| IIQEQDAGLDALSSIISR                        | 1930.1             | 3            | 3.5528 | 0.2907 |
| IIQKDPLR                                  | 983.2              | 2            | 2.5014 | 0.1367 |
| IQLLDDYPK                                 | 1218.4             | 2            | 3.9164 | 0.2987 |
| IIRGFCHLCDGQEACCVGLEAGINPTDHLITAYR        | 3691.2             | 3            | 3.7982 | 0.1057 |
| IIRPLTVYGLEDAPGGHGEVR                     | 2250.5             | 3            | 3.839  | 0.3952 |
| IIRPSETAGR                                | 1100.3             | 2            | 2.7881 | 0.121  |
| IIRVDHAGEYGANR                            | 1571.7             | 3            | 3.4941 | 0.3381 |
| IISAASEGGANVFTVSYFK                       | 1962.2             | 2            | 2.9293 | 0.1913 |
| IISAHGCKVDNSSLTGESEPQTR                   | 2430.6             | 3            | 3.6069 | 0.3164 |
| IISKEGIPGLYR                              | 1346.6             | 2            | 3.0374 | 0.2427 |
| IISKIENHEGVR                              | 1395.6             | 2            | 3.7181 | 0.349  |
| IISLDLPVAEVYKK                            | 1588.9             | 2            | 2.9667 | 0.141  |
| IISNASCTTNCLAPLAK                         | 1721.0             | 2            | 4.775  | 0.4011 |
| IISNASCTTNCLAPLAKVIHDNFGIVEGLMTTVHAITATQK | 4299.0             | 3            | 5.1101 | 0.3653 |
| IISNASCTTNCLAPRAKVLHDNFGIVKGLMTTVHAITATQK | 4341.1             | 3            | 3.8488 | 0.3318 |
| IISDRDLLAVVFGTEKDK                        | 2270.6             | 3            | 5.0291 | 0.2711 |
| IISDRDLLAVVFGTEKDKNSVNFK                  | 2960.3             | 3            | 3.7365 | 0.2019 |
| IISSEKFKEDQYDHLDAADMTK                    | 2570.8             | 3            | 4.3532 | 0.3421 |
| IISSEKQKEENK                              | 1418.6             | 2            | 4.255  | 0.3113 |

| Peptide Sequence           | Peptide mass (m/z) | Charge State | Xcorr  | DelCn2 |
|----------------------------|--------------------|--------------|--------|--------|
| IISIEQKEENKGGEDK           | 1905.1             | 2            | 5.2292 | 0.3253 |
| IISIEQKEENKGGEDKLK         | 2146.4             | 3            | 4.4785 | 0.1887 |
| IISTLANKNDEIQNFIDTLHHTLK   | 2780.1             | 3            | 4.6167 | 0.2797 |
| IISTTASKTETPIVSK           | 1676.9             | 2            | 4.4647 | 0.3887 |
| IISTTNGGQER                | 1176.3             | 2            | 3.4146 | 0.2532 |
| IITADPKKELENLATSLEHYK      | 2414.7             | 3            | 4.0672 | 0.2983 |
| IITEGFEEAAKEK              | 1336.5             | 2            | 3.4992 | 0.301  |
| IITGGAPELAVEGNGPVESNAVLTK  | 2437.7             | 3            | 6.3464 | 0.5227 |
| IITITGTQDQIQNAQYLLQNSVK    | 2590.9             | 3            | 7.2259 | 0.5213 |
| IITKDFPQYFAVVS             | 1785.1             | 2            | 3.81   | 0.3429 |
| IITLAGPTNAIFK              | 1359.6             | 2            | 3.9371 | 0.2643 |
| IITLEEGDIILTGTTPK          | 1714.0             | 2            | 5.433  | 0.4521 |
| IITLTGPTNAIFK              | 1389.7             | 2            | 3.9721 | 0.3435 |
| IITMLPTSINAIEAYSGANGILK    | 2391.8             | 3            | 5.7099 | 0.4363 |
| IITMLPTSINAIEAYSGANGILKK   | 2520.0             | 2            | 3.7545 | 0.3849 |
| IITVEKHPDADSLYVEK          | 1958.2             | 2            | 4.0834 | 0.3198 |
| IITVEKHPDADSLYVEKIDVGEAEPR | 2925.2             | 3            | 6.4293 | 0.4808 |
| IIVDELKQEVISTSSK           | 1790.0             | 2            | 4.8352 | 0.4689 |
| IIVGDATEKDASK              | 1347.5             | 2            | 3.0288 | 0.2534 |
| IIVLGLLPR                  | 994.3              | 2            | 2.7649 | 0.145  |
| IIWELIKEK                  | 1172.4             | 2            | 2.943  | 0.1433 |
| IIWQFIK                    | 948.2              | 2            | 2.5397 | 0.1353 |
| IYGGSVTGATCK               | 1270.5             | 2            | 3.8024 | 0.4216 |
| IYIVHDEVK                  | 1229.4             | 2            | 2.9175 | 0.2236 |
| IYIVHDEVKDK                | 1472.7             | 2            | 3.6124 | 0.1728 |
| IYLNQLLQEDSLNVADLTSLR      | 2532.9             | 2            | 6.4885 | 0.4795 |
| IKAAVEDPRVLLLDL            | 1666.0             | 2            | 3.6987 | 0.292  |
| IKAAVPSIK                  | 927.2              | 2            | 2.6704 | 0.1673 |
| IKADIIYPGHGPVIHNAEAK       | 2144.5             | 3            | 4.5374 | 0.366  |
| IKAESAEAAKK                | 1146.3             | 2            | 3.1099 | 0.2209 |
| IKAIEYEGDGIPTVFVAVAGR      | 2093.4             | 3            | 5.8234 | 0.5424 |
| IKAIPQLQGYLR               | 1400.7             | 2            | 3.9585 | 0.3448 |
| IKAKDIVPGDIVEIAVGDKVPADIR  | 2633.1             | 3            | 5.6353 | 0.4222 |
| IKAPGFAHLAAGLDK            | 1438.7             | 3            | 3.3361 | 0.2946 |
| IKAQDEAFALQDVPLSSVVR       | 2187.5             | 2            | 5.4215 | 0.4066 |
| IKDAFDRNPQLNLLLDFFK        | 2552.9             | 3            | 5.7725 | 0.3717 |

| Peptide Sequence                 | Peptide mass (m/z) | Charge State | Xcorr  | DelCn2 |
|----------------------------------|--------------------|--------------|--------|--------|
| IKDEFQLLQAQYHSLK                 | 1962.2             | 3            | 4.1826 | 0.2663 |
| IKDHIQNGK                        | 1053.2             | 2            | 2.765  | 0.1354 |
| IKDHIQNGKLDLTK                   | 1623.9             | 2            | 3.6275 | 0.1574 |
| IKDIAWTEDSKR                     | 1462.6             | 2            | 3.6945 | 0.304  |
| IKDKNELKEICELTGIDQSVLER          | 2675.1             | 3            | 3.95   | 0.29   |
| IKDLSTIEPLK                      | 1257.5             | 2            | 3.144  | 0.1301 |
| IKDLSTVEALQNLK                   | 1572.8             | 2            | 4.9017 | 0.3118 |
| IKDLSTVEALQNLKLNK                | 1928.3             | 2            | 3.6985 | 0.3321 |
| IKDMDLWEQQEEER                   | 1850.0             | 3            | 4.4717 | 0.1217 |
| IKDMDLWEQQEEERITTMQLER           | 2823.2             | 3            | 3.9016 | 0.2162 |
| IKDPDASKPEDWDER                  | 1801.9             | 2            | 4.1641 | 0.3803 |
| IKDRLPLAVVGSNTIIEVNGK            | 2237.6             | 3            | 4.4149 | 0.3379 |
| IKDSTAASR                        | 949.0              | 2            | 2.4504 | 0.1085 |
| IKDYLLMEEEFIR                    | 1700.0             | 2            | 4.605  | 0.445  |
| IKEALIQSQEQKEILEK                | 2156.5             | 3            | 4.7231 | 0.3241 |
| IKEDEDDK                         | 992.0              | 2            | 2.4846 | 0.1589 |
| IKEDEDDKTVLDLAVVLFETATLR         | 2735.1             | 3            | 6.051  | 0.5186 |
| IKEDNFFQVSK                      | 1355.5             | 2            | 2.9458 | 0.1993 |
| IKEDRPITIKDDK                    | 1571.8             | 2            | 2.9935 | 0.2357 |
| IKEDRPITIKDDKGNLNR               | 2126.4             | 3            | 6.0321 | 0.3558 |
| IKEIAVTVK                        | 1001.2             | 2            | 2.9557 | 0.1618 |
| IKEINETSSSQQLYLLGSYNALPPLHEALLER | 3500.9             | 3            | 5.051  | 0.3945 |
| IKEYIDQEELNK                     | 1650.9             | 2            | 4.6087 | 0.2927 |
| IKELNNTCEPVVTQPKPK               | 2039.4             | 3            | 5.66   | 0.3446 |
| IKELQNAGDR                       | 1144.3             | 2            | 3.0107 | 0.212  |
| IKELTSTCSPISKPKPK                | 1971.4             | 3            | 4.8503 | 0.43   |
| IKELVVTQLGYDTR                   | 1635.9             | 2            | 3.9851 | 0.3053 |
| IKENKPLPPVIPNLVGIR               | 2095.6             | 3            | 3.7336 | 0.2875 |
| IKERVEEKEGIPPQQQR                | 2065.3             | 3            | 3.9783 | 0.1858 |
| IKETPSEQESK                      | 1276.4             | 2            | 3.1952 | 0.1947 |
| IKETVINGLENMGAAFQSMGTGGNIGK      | 2813.3             | 3            | 4.8113 | 0.3668 |
| IKEVKKENGDKK                     | 1416.6             | 2            | 2.5196 | 0.1265 |
| IKEWVDKYDPGALVIPFSGALELK         | 2690.1             | 3            | 4.1685 | 0.1924 |
| IKFETNPEDSPADQTLIVQSQPVEVIYDAK   | 3376.7             | 3            | 5.6463 | 0.4288 |
| IKFPLPHR                         | 1008.2             | 2            | 2.5934 | 0.1918 |
| IKGDAVGRVDEEPTTLPSGEAKPR         | 2523.8             | 3            | 4.4623 | 0.2635 |

| Peptide Sequence                | Peptide mass (m/z) | Charge State | Xcorr  | DelCn2 |
|---------------------------------|--------------------|--------------|--------|--------|
| IKGEELSEANVR                    | 1345.5             | 3            | 3.64   | 0.2199 |
| IKGEHPGLSIGDVAK                 | 1521.7             | 2            | 4.5294 | 0.5096 |
| IKGEHPGLSIGDVAKK                | 1649.9             | 2            | 4.2294 | 0.3898 |
| IKGEQEKELSK                     | 1289.5             | 2            | 2.7918 | 0.1411 |
| IKGGADVSGGVSAPDISLGEGHLSVK      | 2451.7             | 3            | 4.1782 | 0.337  |
| IKGIVEESVTGVHR                  | 1524.7             | 2            | 2.4821 | 0.1824 |
| IKGLPEGFAHPK                    | 1294.5             | 3            | 3.6452 | 0.1734 |
| IKHGDLLFLFPSSLAGPSSEMETSVPVPGFK | 3190.7             | 3            | 5.238  | 0.3726 |
| IKIGDPLLEDTR                    | 1370.6             | 3            | 3.9869 | 0.2663 |
| IKIIAPPER                       | 1037.3             | 2            | 2.7107 | 0.2753 |
| IKINQIQMK                       | 1116.4             | 2            | 2.6971 | 0.1243 |
| IKIYEFPETDDEEENKLVK             | 2340.6             | 3            | 4.1446 | 0.2987 |
| IKKDPAQFLQVHGR                  | 1637.9             | 3            | 4.3805 | 0.3274 |
| IKKIEDASNPLLLK                  | 1582.9             | 2            | 3.0531 | 0.1998 |
| IKKKEVFPFPEVSQDELNEINQFLGPVEK   | 3403.9             | 3            | 3.3058 | 0.1931 |
| IKKLPEYNPR                      | 1258.5             | 3            | 3.2187 | 0.1457 |
| IKKMEEEILLLEDQNSK               | 2061.4             | 2            | 2.4598 | 0.1031 |
| IKKPEGKPDQK                     | 1268.5             | 2            | 3.0449 | 0.1501 |
| IKKPEGKPDQKFDQK                 | 1787.1             | 2            | 3.2613 | 0.2114 |
| IKKTQDQISNIK                    | 1416.6             | 2            | 3.4047 | 0.1412 |
| IKKTQDQISNIKYHEEFEK             | 2379.7             | 3            | 5.7799 | 0.4365 |
| IKLDFLSALGDAKR                  | 1547.8             | 2            | 2.5536 | 0.4236 |
| IKLEAERFENLR                    | 1518.7             | 2            | 2.8961 | 0.1854 |
| IKLGHYATQLQK                    | 1400.7             | 2            | 2.6989 | 0.1738 |
| IKLHQEDNDYINASLIK               | 2015.3             | 3            | 3.7811 | 0.2508 |
| IKLKGTVGEPTYDAEFQHFLR           | 2450.8             | 3            | 4.5281 | 0.2605 |
| IKLQLWDTAGQER                   | 1558.8             | 2            | 3.2057 | 0.2104 |
| IKLTAAEELKPPFMK                 | 1896.3             | 2            | 4.5391 | 0.3703 |
| IKLYSESLAR                      | 1180.4             | 1            | 3.1139 | 0.3733 |
| IKNEVDSTLTFR                    | 1423.6             | 2            | 3.2048 | 0.1972 |
| IKNNDPKLEEVNLLNIR               | 2024.3             | 2            | 3.6668 | 0.3296 |
| IKNVVHELRL                      | 1108.3             | 2            | 2.6884 | 0.2101 |
| IKNYILMR                        | 1051.3             | 2            | 2.5078 | 0.1202 |
| IKPAATSHVEGSGGVSAAK             | 1696.9             | 2            | 4.0394 | 0.5582 |
| IKPENSSSASTGGK                  | 1363.5             | 2            | 2.7581 | 0.1967 |
| IKPHLMSQELPEDWDKQPVK            | 2419.8             | 3            | 4.5052 | 0.4221 |

| Peptide Sequence                         | Peptide mass (m/z) | Charge State | Xcorr  | DelCn2 |
|------------------------------------------|--------------------|--------------|--------|--------|
| IKPHLMSQELPEDWDKQPVKVLVGK                | 2916.4             | 3            | 5.1252 | 0.4155 |
| IKPSTLQVENISIGGVLPLELK                   | 2448.9             | 2            | 2.8302 | 0.1307 |
| IKPVFIEDANFGR                            | 1506.7             | 2            | 2.8767 | 0.2483 |
| IKQEILPEER                               | 1255.4             | 2            | 3.0233 | 0.1043 |
| IKQGLLPSLEDLLFYTIAEGQEK                  | 2607.0             | 3            | 3.6674 | 0.2079 |
| IKQHEGLATFYR                             | 1463.7             | 3            | 4.2519 | 0.3685 |
| IKQHLENDPGSNEDTDIPK                      | 2151.3             | 2            | 5.7015 | 0.4458 |
| IKQHLENDPGSNEDTDIPKGYMDLMPFINK           | 3461.9             | 3            | 4.8053 | 0.1807 |
| IKQLQNISLAAASGGAK                        | 1670.9             | 2            | 3.7518 | 0.2155 |
| IKREVDDLGPVGDIIPLYSTLPPQQQR              | 3548.0             | 3            | 3.8095 | 0.286  |
| IKSDFFELLSNHHLDSQSR                      | 2274.5             | 3            | 5.0415 | 0.3192 |
| IKSDYAQLLEDMQNAFR                        | 2043.3             | 3            | 5.9587 | 0.5011 |
| IKSEHPGLSIGDTAK                          | 1553.7             | 2            | 4.0675 | 0.4176 |
| IKSEHPGLSIGDTAKK                         | 1681.9             | 3            | 4.2667 | 0.4279 |
| IKSESTNHEQQSPQSGK                        | 1886.0             | 2            | 3.8722 | 0.3905 |
| IKSGKQSSTSKLLRDSRGPSVEKLSHRPSDPGKSKGTSHK | 4290.8             | 3            | 3.3518 | 0.1102 |
| IKSLTEYLQNVEQK                           | 1693.9             | 3            | 3.3913 | 0.1927 |
| IKSTNPGISIGDVAK                          | 1500.7             | 2            | 3.9253 | 0.2929 |
| IKSVEELLEAEELLK                          | 1614.9             | 2            | 5.0641 | 0.3802 |
| IKSVEELLEAEELLKVANKEK                    | 2284.7             | 3            | 3.7059 | 0.1174 |
| IKTGPVTLHTQTAIHF AEQIAK                  | 2405.8             | 3            | 3.2321 | 0.2493 |
| IKTLFPLIEAK                              | 1273.6             | 3            | 4.0549 | 0.1595 |
| IKTVDISMILSEAIR                          | 1690.0             | 2            | 3.4068 | 0.2038 |
| IKVAEDEAEAAAAAK                          | 1487.6             | 2            | 4.7304 | 0.4115 |
| IKVAKPVVEMDGD E MTR                      | 1919.3             | 3            | 4.2754 | 0.3339 |
| IKVDEFVTHNLSFDEINK                       | 2149.4             | 2            | 6.0426 | 0.3984 |
| IKVDEFVTHNLSFDEINKAFELMHSGK              | 3150.6             | 3            | 5.0658 | 0.416  |
| IKVDFVIPK                                | 1059.3             | 2            | 3.021  | 0.1464 |
| IKVDNHLFNK                               | 1228.4             | 2            | 2.7061 | 0.1107 |
| IKVDNHLFNKENLPSR                         | 1925.2             | 2            | 4.1384 | 0.3293 |
| IKVENTEENRR                              | 1388.5             | 2            | 2.7758 | 0.1775 |
| IKVFGPGIEGK                              | 1145.4             | 2            | 2.9098 | 0.2193 |
| IKVFGPGIEGKD VFR                         | 1663.0             | 2            | 3.5942 | 0.2712 |
| IKVGDPAEDFGTFFSAVIDAK                    | 2228.5             | 3            | 5.8644 | 0.5227 |
| IKVGRDYVQK                               | 1206.4             | 2            | 2.8525 | 0.1573 |
| IKVLEEQINEGEQQLK                         | 1899.1             | 2            | 3.2585 | 0.2631 |

| Peptide Sequence                          | Peptide mass (m/z) | Charge State | Xcorr  | DelCn2 |
|-------------------------------------------|--------------------|--------------|--------|--------|
| IKVLEQDKAR                                | 1200.4             | 2            | 3.1066 | 0.1811 |
| IKVSNTLESR                                | 1147.3             | 2            | 3.0077 | 0.2757 |
| IKVSNTLESRLDLIAQQMMPEVR                   | 2673.2             | 3            | 3.986  | 0.1972 |
| IKVVNVELPIEANLVWQLGKDLLNMYIETEGK          | 3671.3             | 3            | 4.0772 | 0.2798 |
| IKWGDAGAEYVVESTGVFTTMEK                   | 2519.8             | 2            | 5.7186 | 0.4795 |
| IKXGDSGTEYIIESTGVFTTMEK                   | 2520.8             | 3            | 3.6381 | 0.1062 |
| IKYPENFFLLR                               | 1440.7             | 2            | 2.7126 | 0.1768 |
| ILAAALTQHNGDAAASLTVAEQYVSAFSK             | 2949.3             | 3            | 5.7341 | 0.4079 |
| ILADEALKLGILDKVVNSDPVEEAIR                | 2822.2             | 3            | 5.9717 | 0.3378 |
| ILADPLDQMKAEAYK                           | 1707.0             | 2            | 3.9609 | 0.3693 |
| ILAEGGGAK                                 | 815.9              | 1            | 2.069  | 0.2267 |
| ILAGDKNYITMDELRL                          | 1753.0             | 2            | 4.4096 | 0.3989 |
| ILAGSADSEGVAAPR                           | 1414.5             | 2            | 4.65   | 0.4118 |
| ILAIENLNK                                 | 1156.4             | 2            | 3.9248 | 0.1717 |
| ILAIIGLINEALDEGDAQK                       | 1884.1             | 2            | 5.4622 | 0.411  |
| ILAIIGLINEALDEGDAQKTLQALQIPAAK            | 3019.5             | 3            | 4.0931 | 0.3725 |
| ILALQENFLLQFK                             | 1577.9             | 2            | 4.255  | 0.3768 |
| ILAQATSDLVNAIK                            | 1457.7             | 2            | 4.2108 | 0.3652 |
| ILAQATSDLVNAIKADAEGESDLENSR               | 2832.0             | 3            | 4.1922 | 0.3186 |
| ILAQATSDLVNAIKADAEGESDLENSRK              | 2960.2             | 3            | 4.0457 | 0.3011 |
| ILAQITGTEHLKESEADNTKK                     | 2327.6             | 3            | 3.5193 | 0.2826 |
| ILARGENLEHLR                              | 1421.6             | 3            | 3.4861 | 0.221  |
| ILASPVELALVVMK                            | 1483.9             | 3            | 3.5063 | 0.3278 |
| ILASPVELALVVMKDLSQNFPTK                   | 2515.0             | 2            | 4.3923 | 0.3792 |
| ILASTQFEPTAAR                             | 1405.6             | 2            | 4.0503 | 0.4208 |
| ILATPPQEDAPSVDIANIR                       | 2021.3             | 3            | 5.8455 | 0.4736 |
| ILAVGTQTGALR                              | 1200.4             | 2            | 3.2329 | 0.3311 |
| ILCEELGAPANSVNCVPLEDFGGHHPDPNLTYAADLVETMK | 4454.0             | 3            | 3.8444 | 0.2579 |
| ILDAAGANLK                                | 986.1              | 2            | 3.4999 | 0.2392 |
| ILDDDTIITTLLENLKR                         | 1874.1             | 2            | 5.0183 | 0.3568 |
| ILDDSDSNLSVVK                             | 1405.5             | 2            | 3.4321 | 0.1863 |
| ILDEIEEHNK                                | 1353.5             | 2            | 3.9602 | 0.3004 |
| ILDELEKVLQVETELQR                         | 2171.4             | 3            | 4.9246 | 0.3014 |
| ILDELEKVLQVETELQRR                        | 2327.6             | 3            | 3.3461 | 0.2657 |
| ILDFSATPDLPDQVLR                          | 1801.0             | 2            | 2.6558 | 0.1633 |
| ILDIDNVDLAMGK                             | 1417.7             | 2            | 3.5021 | 0.3907 |



| Peptide Sequence                      | Peptide mass (m/z) | Charge State | Xcorr  | DelCn2 |
|---------------------------------------|--------------------|--------------|--------|--------|
| ILDLGITGPEGHVLSRPEEVEAEAVNR           | 2902.2             | 3            | 5.1766 | 0.4151 |
| ILDLIESGK                             | 988.2              | 2            | 2.7422 | 0.1302 |
| ILDLIESGKK                            | 1116.3             | 2            | 3.2885 | 0.2338 |
| ILDLIESGKKEGAK                        | 1501.8             | 2            | 3.9213 | 0.3181 |
| ILDQLQLEFDEK                          | 1363.5             | 2            | 2.4551 | 0.1451 |
| ILDNLMEMK                             | 1107.4             | 2            | 3.2259 | 0.2088 |
| ILDNTSEPPQPGEAR                       | 1527.6             | 2            | 4.6719 | 0.3519 |
| ILDPEGLALGAVIASSK                     | 1654.9             | 2            | 2.4976 | 0.1061 |
| ILDPTNGEPAPVLSSPPPADVSTFLAFPSPEK      | 3292.7             | 3            | 4.0476 | 0.3509 |
| ILDQGEDFPASEMTR                       | 1709.9             | 2            | 5.2246 | 0.5162 |
| ILDQSEAEKAR                           | 1260.4             | 2            | 2.8711 | 0.1338 |
| ILDQSEAEKARKELLELEALSMAVESTGTAK       | 3362.8             | 3            | 4.8158 | 0.3533 |
| ILDQSEAEKARKELLELEALSMAVESTGTAKAEAESR | 4006.4             | 3            | 5.8937 | 0.4265 |
| ILDSFAAAPVPTTTLVLK                    | 1858.2             | 2            | 4.3262 | 0.3517 |
| ILDSGNKKN                             | 989.1              | 2            | 2.7637 | 0.2176 |
| ILDSVGIEADDDRLNK                      | 1773.9             | 2            | 4.6685 | 0.349  |
| ILDSVGIEADDDRLNKVISELNGK              | 2614.9             | 3            | 5.9348 | 0.4182 |
| ILDSVGIEADDDRLNKVISELNGKNIEDVIAQGIGK  | 3853.3             | 3            | 8.4241 | 0.4983 |
| ILDVLEEIPK                            | 1169.4             | 2            | 4.0402 | 0.2112 |
| ILDVLEEIPKNAAYR                       | 1745.0             | 2            | 3.9163 | 0.3594 |
| ILDVLEEIPKNAAYRK                      | 1873.2             | 3            | 3.6771 | 0.1209 |
| ILDWHVANTDKK                          | 1440.6             | 2            | 3.6395 | 0.335  |
| ILEDLKAIKPQYVDQIPK                    | 2340.7             | 3            | 3.8894 | 0.1071 |
| ILEDNSIPQVK                           | 1256.4             | 2            | 2.9597 | 0.1002 |
| ILEDNSIPQVKDIIFAIK                    | 2057.4             | 2            | 3.9775 | 0.3043 |
| ILEDNSIPQVKDIIFAIKK                   | 2185.6             | 2            | 4.1258 | 0.3019 |
| ILEDQEEENPLPAALVQPHTGK                | 2300.6             | 3            | 5.1346 | 0.404  |
| ILEENKELENALK                         | 1543.7             | 2            | 4.5313 | 0.2889 |
| ILEEVMEKETYKTAK                       | 1813.1             | 2            | 3.0607 | 0.3134 |
| ILEFFGLK                              | 967.2              | 2            | 3.0322 | 0.1837 |
| ILEFFGLKK                             | 1095.4             | 2            | 2.922  | 0.1986 |
| ILEIEDLFSSLK                          | 1407.6             | 2            | 3.1349 | 0.227  |
| ILELDQFKGQQGQK                        | 1632.8             | 2            | 4.7038 | 0.3264 |
| ILELSGSSSEDSEK                        | 1481.5             | 2            | 4.7574 | 0.4037 |
| ILELSGSSSEDSEKVIAGLYQR                | 2382.6             | 3            | 5.2037 | 0.3575 |
| ILEMGITGPEGHALSRPEELEAEAVFR           | 2953.3             | 3            | 3.9211 | 0.2497 |

| Peptide Sequence                            | Peptide mass (m/z) | Charge State | Xcorr  | DelCn2 |
|---------------------------------------------|--------------------|--------------|--------|--------|
| ILENEKDLEEAEYKEAR                           | 2209.4             | 2            | 6.2476 | 0.4474 |
| ILEPGLNILIPVLDR                             | 1676.0             | 3            | 4.1846 | 0.441  |
| ILEQEEEEEQAGKPGEPSKKEEGR                    | 2727.9             | 3            | 5.5297 | 0.4014 |
| ILEQQNSSR                                   | 1075.2             | 2            | 3.3137 | 0.2405 |
| ILETTTFFQR                                  | 1256.4             | 2            | 3.3536 | 0.3009 |
| ILEVHIDKGMKDGQK                             | 1712.0             | 2            | 2.403  | 0.1126 |
| ILEVHVDKGMK                                 | 1269.5             | 2            | 3.7221 | 0.3034 |
| ILEVNHVNVEGATHK                             | 1660.9             | 2            | 4.8767 | 0.3799 |
| ILEVNHVNVEGATHKQVVDLIR                      | 2484.8             | 3            | 4.3729 | 0.3369 |
| ILEVVKDK                                    | 944.2              | 2            | 2.8553 | 0.1156 |
| ILEVVKDKAGPHK                               | 1434.7             | 2            | 2.801  | 0.1085 |
| ILEVVKDKAGPHKEIYPYVIQELRPTLNELGISTPEELGLDKV | 4846.6             | 3            | 4.3506 | 0.3558 |
| ILEVVNQIQDEER                               | 1585.7             | 2            | 4.2504 | 0.4021 |
| ILFIFIDSDHTDNQR                             | 1835.0             | 2            | 4.9466 | 0.4082 |
| ILFLDPSGKVVHPEIINENGNPSYK                   | 2683.0             | 3            | 4.1456 | 0.354  |
| ILFQEFR                                     | 953.1              | 2            | 2.4344 | 0.1223 |
| ILFRPVASQLPR                                | 1397.7             | 2            | 3.9571 | 0.3076 |
| ILFSSREEQQDILSK                             | 1794.0             | 2            | 2.5801 | 0.1204 |
| ILGADTSVDLEETGR                             | 1576.7             | 2            | 5.6038 | 0.5048 |
| ILGADTSVDLEETGRVLSIGDGIAR                   | 2558.8             | 3            | 4.8365 | 0.4422 |
| ILGATIENSR                                  | 1074.2             | 2            | 3.2461 | 0.215  |
| ILGGHLDK                                    | 924.1              | 2            | 2.8265 | 0.1803 |
| ILGGSVLHLVLALR                              | 1461.8             | 2            | 4.4454 | 0.4456 |
| ILGGVISAISEAAAQYNPEPPPPR                    | 2448.8             | 3            | 6.4574 | 0.4987 |
| ILGILALIDEGETDWK                            | 1787.0             | 2            | 3.7322 | 0.434  |
| ILGIPVIVTEQYPK                              | 1570.9             | 2            | 3.5289 | 0.3483 |
| ILGLAIESQDAGIK                              | 1428.7             | 2            | 2.7262 | 0.2011 |
| ILGSGISSSSVLHGMVFKK                         | 1948.3             | 2            | 3.7932 | 0.3543 |
| ILGTAGTEEGQK                                | 1204.3             | 2            | 3.6504 | 0.3275 |
| ILGTAGTEEGQKIVLQNGAHEVFNHR                  | 2820.1             | 3            | 4.9683 | 0.3586 |
| ILGVDKNASEDEIKK                             | 1659.9             | 2            | 4.9422 | 0.1098 |
| ILGWGVENGTPYWLVANSWNTDWGDNGFFK              | 3445.7             | 3            | 6.0279 | 0.3831 |
| ILGYINTGKQEGAK                              | 1492.7             | 2            | 3.6392 | 0.2288 |
| ILHENTQTDK                                  | 1199.3             | 2            | 2.8137 | 0.2294 |
| ILHENTQTDKALYNR                             | 1817.0             | 3            | 3.341  | 0.1452 |
| ILHGLGFTPAMQR                               | 1441.7             | 2            | 3.1818 | 0.2332 |

| Peptide Sequence                          | Peptide mass (m/z) | Charge State | Xcorr  | DelCn2 |
|-------------------------------------------|--------------------|--------------|--------|--------|
| ILHLLGQEGPK                               | 1205.4             | 2            | 3.2282 | 0.1269 |
| ILHLLTQEALSIHGVK                          | 1773.1             | 2            | 5.2678 | 0.5221 |
| ILHNDPEVEKK                               | 1322.5             | 2            | 3.1056 | 0.2281 |
| ILHQHLGAPEER                              | 1400.6             | 3            | 4.0912 | 0.3552 |
| ILHSYVPEEIRDGNQVR                         | 2026.2             | 2            | 3.3767 | 0.2515 |
| ILHTLLASGEDALDFTQESEPSYISDVGPPGR          | 3416.7             | 3            | 5.6069 | 0.418  |
| ILHVDNHIGISIAGLTADAR                      | 2087.4             | 3            | 5.2067 | 0.4678 |
| ILHVNGFNPEGGEEDPQAAR                      | 2111.2             | 3            | 4.7861 | 0.2992 |
| ILIAKPIMFR                                | 1202.6             | 2            | 2.4366 | 0.1053 |
| ILIAN TGMDTDKIK                           | 1533.8             | 2            | 3.9758 | 0.329  |
| ILIIGESGVGK                               | 1086.3             | 2            | 3.362  | 0.1731 |
| ILIIIGSIANFTNVAATFK                       | 1951.3             | 2            | 3.4796 | 0.2632 |
| ILIIGNSSVGK                               | 1101.3             | 2            | 2.6227 | 0.1361 |
| ILIRPMYSNPPLNGAR                          | 1813.2             | 2            | 3.3483 | 0.2015 |
| ILIRPTAFKPVLPKPR                          | 1847.3             | 3            | 3.5128 | 0.2226 |
| ILISLATGHR                                | 1081.3             | 2            | 2.6966 | 0.1128 |
| ILISLATGHREEGGENLDQAR                     | 2280.5             | 2            | 4.1868 | 0.359  |
| ILISLATGHREEGGENLDQAREDAQEIADTPSGDKTSLETR | 4425.7             | 3            | 3.4421 | 0.3055 |
| ILITTVPPNLR                               | 1237.5             | 2            | 2.8712 | 0.1982 |
| ILIVGGGVAGLASAGAAK                        | 1525.8             | 2            | 5.3702 | 0.4843 |
| ILKEDILNYLEK                              | 1491.8             | 2            | 4.4121 | 0.3086 |
| ILKEEQELYQK                               | 1421.6             | 2            | 3.3884 | 0.2604 |
| ILKGEYAVR                                 | 1049.2             | 2            | 3.2274 | 0.206  |
| ILKHEGLGAFYK                              | 1376.6             | 3            | 3.9893 | 0.3376 |
| ILKLPSFELLHK                              | 1438.8             | 3            | 3.9823 | 0.3191 |
| ILKPTDENLLK                               | 1284.5             | 2            | 2.9814 | 0.1142 |
| ILKQPSTQSDTYSMALGNVWLQTLHQPTR             | 3428.9             | 3            | 3.9152 | 0.2086 |
| ILKRPTSNQGVSSPNSTSRPTLPVK                 | 2637.0             | 3            | 4.3087 | 0.2449 |
| ILLAELEQLK                                | 1170.4             | 2            | 4.1909 | 0.2032 |
| ILLAELEQLKGQ GK                           | 1540.8             | 2            | 4.5923 | 0.3863 |
| ILLANFLAQTEALMR                           | 1705.1             | 2            | 5.332  | 0.495  |
| ILLANFLAQTEALMRGK                         | 1890.3             | 2            | 3.5933 | 0.3207 |
| ILLANRNEVFHR                              | 1482.7             | 2            | 2.5339 | 0.1382 |
| ILLDAQHESGR                               | 1239.4             | 2            | 2.4645 | 0.127  |
| ILLDQVEEAVADFDECIR                        | 2079.3             | 2            | 3.769  | 0.2804 |
| ILLELLNQMDGFDQNVNVK                       | 2204.5             | 2            | 6.0034 | 0.4458 |

| Peptide Sequence                   | Peptide mass (m/z) | Charge State | Xcorr  | DelCn2 |
|------------------------------------|--------------------|--------------|--------|--------|
| ILLENLGEASSQPSPTQSVQETVR           | 2584.8             | 3            | 6.4682 | 0.4202 |
| ILLEPYKYLLQLPGK                    | 1789.2             | 2            | 2.6781 | 0.1095 |
| ILLHHAANSVK                        | 1203.4             | 2            | 2.7722 | 0.2947 |
| ILLITEDLKNIGNTFFK                  | 1980.3             | 2            | 2.6124 | 0.1499 |
| ILLLGAGESGK                        | 1058.3             | 2            | 3.4056 | 0.2666 |
| ILLLGEAQVGK                        | 1141.4             | 2            | 2.5415 | 0.1285 |
| ILLLGLDNAGK                        | 1127.4             | 2            | 3.2115 | 0.1406 |
| ILLLGLDNAGKTLLK                    | 1684.1             | 2            | 4.3737 | 0.278  |
| ILLLNEMEKLEK                       | 1473.8             | 2            | 3.9759 | 0.1933 |
| ILLNPQDKDGSFSVITGLR                | 2173.5             | 2            | 4.7593 | 0.4138 |
| ILLNPQDKDGSFSVITGLRK               | 2301.7             | 3            | 4.9862 | 0.3324 |
| ILLQGTPVAQMTEDAVDAER               | 2158.4             | 2            | 2.9099 | 0.194  |
| ILLRNPGNQAAYEHFETMK                | 2233.5             | 3            | 5.0871 | 0.3433 |
| ILLSHFNWDKEK                       | 1530.8             | 2            | 2.9352 | 0.1996 |
| ILLSQTTGVAIPLHASSLDDVSLASTPK       | 2836.2             | 3            | 4.9488 | 0.406  |
| ILLSVVSMLAEPNDESGANVDASK           | 2460.7             | 2            | 3.1741 | 0.1754 |
| ILLTEPPMNPTK                       | 1354.6             | 2            | 2.9968 | 0.1917 |
| ILLTQENPFFR                        | 1378.6             | 2            | 3.2065 | 0.2477 |
| ILMADADGATKFPDVEKLEK               | 2192.5             | 3            | 4.087  | 0.1917 |
| ILMHHIPEQTTQLLK                    | 1803.2             | 2            | 3.2888 | 0.2847 |
| ILMVGLDAAGK                        | 1088.3             | 2            | 3.4623 | 0.324  |
| ILNDDTALKEYK                       | 1423.6             | 2            | 3.3684 | 0.3252 |
| ILNEDGSPNLDFKPEDQPHFDIKDEF         | 3061.3             | 3            | 3.8964 | 0.2224 |
| ILNFLMHPKPSGKPLPK                  | 1918.4             | 2            | 3.334  | 0.2056 |
| ILNHVLQHAEPGNAQSVLEAIDTYCEQK       | 3122.5             | 3            | 7.1695 | 0.4434 |
| ILNNGHAFNVEFDDSQDK                 | 2064.2             | 2            | 5.1366 | 0.4153 |
| ILNNGHAFNVEFDDSQDKAVLK             | 2475.7             | 3            | 5.7137 | 0.4206 |
| ILNNGHAFNVEFDDSQDKAVLKGGPLDGTYR    | 3392.7             | 3            | 6.0746 | 0.5029 |
| ILNNSGLPITSAIDLEDAAK               | 2056.3             | 2            | 5.468  | 0.5804 |
| ILNPEEIEKYVAEIEKEKEENEK            | 3061.4             | 3            | 4.0048 | 0.2708 |
| ILPEIIPILEEGLR                     | 1605.9             | 3            | 3.845  | 0.3079 |
| ILPEYLSNWTMEK                      | 1624.9             | 2            | 3.8564 | 0.3991 |
| ILPNKVDPLVSLMMVEK                  | 1927.4             | 2            | 3.4874 | 0.2834 |
| ILPNKVDPLVSLMMVEKVPDSTYEMIGGLDKQIK | 3803.5             | 3            | 3.9138 | 0.2775 |
| ILPSVSHKPFESIDEGHVTHNWDEVDPDPNQLR  | 3810.1             | 3            | 3.4088 | 0.1773 |
| ILPTLEAVAALGNK                     | 1410.7             | 2            | 3.9375 | 0.4108 |

| Peptide Sequence                     | Peptide mass (m/z) | Charge State | Xcorr  | DelCn2 |
|--------------------------------------|--------------------|--------------|--------|--------|
| ILPTLEAVAALGNKVVESLR                 | 2094.5             | 2            | 4.5755 | 0.5113 |
| ILPVFDEPPNPTNVEESLKR                 | 2295.6             | 2            | 3.693  | 0.3192 |
| ILQDGGGLQVVEK                        | 1299.5             | 2            | 4.0142 | 0.2299 |
| ILQDIASGSHPFSSQVLK                   | 1841.1             | 2            | 5.5355 | 0.3956 |
| ILQDIASGSHPFSSQVLKEAK                | 2169.5             | 2            | 5.4938 | 0.4124 |
| ILQDVADEEIAALPR                      | 1653.9             | 2            | 3.8998 | 0.2837 |
| ILQDYKSLQDIIAILGMDELSEEDKLTVSR       | 3437.9             | 3            | 4.5196 | 0.2182 |
| ILQEAQNLMTNVDTPKGGNTPLHESDFSGVTPQR   | 4107.6             | 3            | 5.0596 | 0.3103 |
| ILQEDPTNTAAR                         | 1329.4             | 2            | 3.8564 | 0.2235 |
| ILQEGVDPK                            | 999.1              | 2            | 3.1469 | 0.2747 |
| ILQEGVDPKKLDSLTTSGFPVGAATLVDEVGVDVAK | 3818.3             | 3            | 6.0294 | 0.47   |
| ILQEHEQIK                            | 1138.3             | 2            | 2.7434 | 0.1269 |
| ILQEHEQIKK                           | 1266.5             | 2            | 3.3567 | 0.1767 |
| ILQEKLDQPVSAPPSPR                    | 1876.1             | 2            | 4.2156 | 0.3828 |
| ILQETVKELAPR                         | 1397.6             | 2            | 3.6304 | 0.2271 |
| ILQEYITQEGHKLETGAPRPPATVTNAVSWR      | 3464.9             | 3            | 5.3335 | 0.3994 |
| ILQEYITQQSNKLETGK                    | 1994.2             | 2            | 4.8597 | 0.3601 |
| ILQEYQVQYTPQGDSDNGKENQTVHK           | 3021.2             | 3            | 5.3185 | 0.2746 |
| ILQHSHGIEEERQDLTTALGLVK              | 2588.9             | 3            | 3.4438 | 0.2341 |
| ILQMEEEEYIQLCEDIIQLKPDVVITEK         | 3362.9             | 3            | 5.2537 | 0.3932 |
| ILQNIKVFDFTFSPPEEMK                  | 2187.5             | 2            | 3.0293 | 0.2287 |
| ILQNIKVFDFTFSPPEEMKQLNALNK           | 2969.4             | 3            | 4.6924 | 0.342  |
| ILRDIEQYYSTQIDEMPMNVADLI             | 2872.3             | 3            | 3.7585 | 0.215  |
| ILRDIETFYNTTVEEMPMNVADLI             | 2829.2             | 3            | 4.7397 | 0.3745 |
| ILREFLGK                             | 976.2              | 2            | 2.6443 | 0.1521 |
| ILRPWQSSETR                          | 1373.5             | 3            | 3.2388 | 0.271  |
| ILSDMRSQYEVMAEQNR                    | 2071.3             | 3            | 4.4343 | 0.3159 |
| ILSDMRSQYEVMAEQNRK                   | 2199.5             | 3            | 4.5287 | 0.3496 |
| ILSDVTHSAVFGVPASK                    | 1729.0             | 2            | 4.3933 | 0.3569 |
| ILSGRPPLGFLNPR                       | 1537.8             | 2            | 3.5527 | 0.2321 |
| ILSGVVTK                             | 817.0              | 1            | 1.8647 | 0.1285 |
| ILSHTEEHKKFE                         | 1498.7             | 2            | 2.9811 | 0.2984 |
| ILSIGGGAGEIDLQILSK                   | 1785.1             | 2            | 2.8373 | 0.3128 |
| ILSIQKDLANIAEVEVSIPAK                | 2252.6             | 2            | 2.5566 | 0.1781 |
| ILSIQKDLANIAEVEVSIPAKLHNSLIGTK       | 3216.8             | 3            | 5.2516 | 0.2049 |
| ILSISADIETIGEILK                     | 1716.0             | 2            | 5.2553 | 0.4916 |

| Peptide Sequence                        | Peptide mass (m/z) | Charge State | Xcorr  | DelCn2 |
|-----------------------------------------|--------------------|--------------|--------|--------|
| ILSISADIETIGEILKK                       | 1844.2             | 2            | 5.0356 | 0.5259 |
| ILSLLAASGPTWDQVPPFQWSTSPFSGLLHMGQPDLWK  | 4210.8             | 3            | 4.7191 | 0.3938 |
| ILSLQNHIIENNHIYLGR                      | 2398.8             | 3            | 5.2447 | 0.3973 |
| ILSNNPSK                                | 873.0              | 2            | 2.4466 | 0.1304 |
| ILSSDDYGKDLTSVMR                        | 1801.0             | 2            | 3.8058 | 0.5204 |
| ILSTIDRELLKPNASVALHK                    | 2219.6             | 3            | 4.1153 | 0.3589 |
| ILTAERDYLDLTASNFFVDDYAR                 | 2824.1             | 3            | 5.1199 | 0.3405 |
| ILTDIMWPIIAK                            | 1414.8             | 1            | 2.6059 | 0.2108 |
| ILTDKLKEAETR                            | 1417.6             | 2            | 3.823  | 0.2805 |
| ILTDYGFEGHPFR                           | 1552.7             | 2            | 3.2211 | 0.3524 |
| ILTDYGFEGHPFRK                          | 1680.9             | 2            | 3.7991 | 0.375  |
| ILTEAEIDAHLVALAERD                      | 1980.2             | 2            | 5.5089 | 0.4598 |
| ILTERGYSFTTTAER                         | 1745.9             | 2            | 3.743  | 0.3235 |
| ILTFDQLALDSPK                           | 1461.7             | 2            | 3.6407 | 0.4201 |
| ILTGGADKNVVVFDK                         | 1576.8             | 2            | 3.1938 | 0.2383 |
| ILTHVAEMQGK                             | 1227.5             | 2            | 3.205  | 0.3891 |
| ILTKLLEVSDDPQVLAVAAHDVGEYVR             | 2952.4             | 3            | 3.2767 | 0.1985 |
| ILTLSQIGR                               | 1001.2             | 2            | 2.8152 | 0.2312 |
| ILTMDGLIEDIKHR                          | 1655.0             | 2            | 2.7417 | 0.3719 |
| ILTPLVSLDTPGK                           | 1354.6             | 2            | 3.6086 | 0.3556 |
| ILTSVDQYLELIGNSLPGTTAK                  | 2334.7             | 3            | 4.5548 | 0.3179 |
| ILTTASSHEFEHTK                          | 1601.7             | 2            | 4.2414 | 0.4114 |
| ILTTASSHEFEHTKK                         | 1729.9             | 2            | 4.0185 | 0.4651 |
| ILTTASSHEFEHTKKDLDGFR                   | 2433.7             | 3            | 3.5441 | 0.3365 |
| ILTTNTWSSSELSK                          | 1480.6             | 2            | 4.0689 | 0.4603 |
| ILTTSEDSNAQEIKDIYGLNGQIEHK              | 2918.2             | 3            | 5.8393 | 0.2453 |
| ILTVEDHYYEGGIGEAVSSAVVGEPGITVTHLAVNR    | 3755.1             | 3            | 6.5169 | 0.43   |
| ILTVEDHYYEGGIGEAVSSAVVGEPGITVTHLAVNRVPR | 4107.6             | 3            | 6.6161 | 0.5184 |
| ILVAHDIHTK                              | 1147.4             | 2            | 2.77   | 0.2515 |
| ILVATNLFGR                              | 1104.3             | 2            | 3.5265 | 0.3514 |
| ILVGNKNDDPER                            | 1370.5             | 2            | 2.8937 | 0.2135 |
| ILVTGGSGLVGK                            | 1101.3             | 2            | 2.9363 | 0.1832 |
| ILVTLHTLER                              | 1308.6             | 2            | 3.0483 | 0.2489 |
| ILYEGTHLDPERK                           | 1571.8             | 2            | 3.212  | 0.1256 |
| ILYIVASDPYSR                            | 1397.6             | 2            | 3.3686 | 0.3158 |
| ILYKLPGHAGSINEVAFHPDEPIIISASSDKR        | 3476.9             | 3            | 6.061  | 0.4568 |

| Peptide Sequence                  | Peptide mass (m/z) | Charge State | Xcorr  | DelCn2 |
|-----------------------------------|--------------------|--------------|--------|--------|
| ILYMTDEVNDPSLTIK                  | 1853.1             | 2            | 4.4422 | 0.4044 |
| ILYSQCGDVMR                       | 1285.5             | 2            | 2.5909 | 0.1646 |
| IMDATNILVSPLVYLYPDIPKEEAFGK       | 3038.5             | 3            | 4.893  | 0.335  |
| IMDPNIVGSEHYDVAR                  | 1817.0             | 2            | 5.3325 | 0.4514 |
| IMDPYKASYGVEDPEYAVTQLAQTMR        | 3079.5             | 3            | 3.9378 | 0.1857 |
| IMEGPAFNFLDAPAVR                  | 1749.0             | 2            | 4.8435 | 0.5024 |
| IMELEDHITQK                       | 1357.6             | 2            | 3.8154 | 0.1699 |
| IMESFKNMVPQQALVIR                 | 2005.4             | 2            | 5.4087 | 0.459  |
| IMGIPEEEQMGLLR                    | 1616.9             | 2            | 4.2357 | 0.429  |
| IMGLDLPDGGHLTHGYMSDVKR            | 2413.8             | 3            | 4.0203 | 0.3952 |
| IMGPNYTPGKKEDLYLKPIQR             | 2462.9             | 3            | 5.5732 | 0.3968 |
| IMHFPTWVDLKGEDSVPDTVHHVVVPVNP     | 3394.9             | 3            | 4.6237 | 0.3922 |
| IMIPLKISPLQ                       | 1253.6             | 2            | 3.0708 | 0.2003 |
| IMIPLKTSPLQ                       | 1241.6             | 2            | 2.8287 | 0.2273 |
| IMKNEIQDLQTK                      | 1461.7             | 2            | 3.9754 | 0.1171 |
| IMLFTGGPPTQGPGMVVGDELKIPR         | 2725.3             | 3            | 5.0465 | 0.4991 |
| IMLFTNEDNPHGNSAK                  | 1904.1             | 2            | 5.4721 | 0.4875 |
| IMLKGDNITLLQSVSN                  | 1747.1             | 2            | 3.9036 | 0.2986 |
| IMLKNVEDFTGPR                     | 1520.8             | 2            | 3.0581 | 0.2365 |
| IMLLNHPDKGGSPYIAAK                | 1926.3             | 3            | 3.4745 | 0.2248 |
| IMLPWDPTGK                        | 1158.4             | 2            | 2.5334 | 0.2166 |
| IMMQVHGSK                         | 1031.3             | 2            | 2.5968 | 0.2213 |
| IMNEEDPEKQR                       | 1389.5             | 2            | 4.0306 | 0.2221 |
| IMNHEERFQFPSHVTDVSEEAKDLIQR       | 3257.6             | 3            | 3.6804 | 0.1646 |
| IMNTFSVMPSPK                      | 1352.6             | 2            | 4.0455 | 0.3115 |
| IMNTFSVVPSPK                      | 1320.6             | 2            | 4.6162 | 0.3403 |
| IMNVIGEPIDER                      | 1386.6             | 2            | 4.3972 | 0.3818 |
| IMNVIGEPIDERGPIK                  | 1782.1             | 2            | 4.2321 | 0.2555 |
| IMNVIGEPIDERGPIKTK                | 2011.4             | 2            | 4.2413 | 0.3358 |
| IMQEEGQPLKLPDTR                   | 1884.2             | 2            | 4.2166 | 0.3811 |
| IMQQMSDHRYDK                      | 1552.8             | 2            | 2.7162 | 0.1213 |
| IMQSSSEVGYDAMAGDFVNMVEK           | 2509.8             | 2            | 6.6339 | 0.5904 |
| IMQSSSEVGYDAMAGDFVNMVEKGIIDPTK    | 3234.7             | 3            | 4.8212 | 0.3654 |
| IMQSSSEVGYDAMAGDFVNMVEKGIIDPTKVVR | 3589.1             | 3            | 4.8017 | 0.369  |
| IMQVVDEKLPGLLGNFPGPFEEEMK         | 2819.3             | 3            | 3.224  | 0.1899 |
| IMSQSQVSK                         | 1008.2             | 2            | 2.4595 | 0.1524 |

| Peptide Sequence                        | Peptide mass (m/z) | Charge State | Xcorr  | DelCn2 |
|-----------------------------------------|--------------------|--------------|--------|--------|
| IMSVIREWGSQSDTLR                        | 1808.1             | 2            | 2.773  | 0.1663 |
| IMVANIEEVLQR                            | 1415.7             | 3            | 4.4635 | 0.1849 |
| IMVANIEEVLQRGEALSALDSK                  | 2387.7             | 2            | 5.6324 | 0.5129 |
| IMVANIEEVLQRGEALSALDSKANNLSSLSK         | 3302.7             | 3            | 4.6966 | 0.2977 |
| IMVANIEEVLQRGEALSALDSKANNLSSLSKK        | 3430.9             | 3            | 4.9778 | 0.3565 |
| IMYDLTSKPPGTTEWE                        | 1869.1             | 2            | 2.4985 | 0.2847 |
| IMYLSEAYFR                              | 1293.5             | 2            | 3.6824 | 0.2102 |
| IMYTVFEHTFHVR                           | 1681.0             | 2            | 3.7597 | 0.4894 |
| INAAEIESR                               | 1003.1             | 2            | 2.5523 | 0.1473 |
| INAGMLAQFIDKPVCFVGR                     | 2080.5             | 2            | 3.8023 | 0.3927 |
| INAGMYILSPAVLR                          | 1518.8             | 2            | 3.0135 | 0.1385 |
| INALTAASEAACLIVSVDETIKNPR               | 2601.0             | 3            | 4.4432 | 0.3749 |
| INASKNQDDGK                             | 1318.4             | 2            | 3.5072 | 0.1598 |
| INAWNSPTLPIYEPGLK                       | 1914.2             | 2            | 4.1596 | 0.3507 |
| INDRFEFPEQLPLDEFLQK                     | 2379.7             | 2            | 3.6828 | 0.2249 |
| INEAIVAVQAIADPK                         | 1666.0             | 2            | 3.2936 | 0.4082 |
| INEAKDLLEGQAKK                          | 1557.8             | 2            | 3.8997 | 0.3003 |
| INEGFDLLHSGK                            | 1330.5             | 2            | 3.3147 | 0.2485 |
| INEGFDLLR                               | 1077.2             | 2            | 2.8839 | 0.1643 |
| INEGIGQGDLSELPELHALTAGLK                | 2476.8             | 3            | 4.1572 | 0.1729 |
| INEGLEHLAK                              | 1124.3             | 2            | 3.0439 | 0.2035 |
| INEILSNALK                              | 1115.3             | 2            | 3.0492 | 0.1096 |
| INEILSNALKRGEIIAK                       | 1883.2             | 2            | 3.1213 | 0.1577 |
| INEKPQVIADYESGR                         | 1719.9             | 2            | 4.7736 | 0.4768 |
| INELTGIKESDTGLAPPALWDLAADKQTLQSEQPLQVAR | 4219.7             | 3            | 5.9741 | 0.2896 |
| INEVQTDVGVDTK                           | 1418.5             | 2            | 4.5592 | 0.4045 |
| INFDDNAEFR                              | 1241.3             | 2            | 3.0972 | 0.3472 |
| INFDDNAEFRQK                            | 1497.6             | 2            | 3.7542 | 0.2516 |
| INFDKYHPGYFGK                           | 1586.8             | 2            | 4.4897 | 0.3957 |
| INFDVNGYIVGANIETYLLEK                   | 2386.7             | 2            | 4.4151 | 0.351  |
| INGEVSSISSKFETEPVSK                     | 2039.2             | 2            | 4.1479 | 0.4386 |
| INGKDSIEKEHVEEISELFYDAK                 | 2694.9             | 3            | 5.4069 | 0.4433 |
| INHEGEVNR                               | 1068.1             | 2            | 3.0261 | 0.3231 |
| INHNSQSIKEK                             | 1298.4             | 2            | 3.0788 | 0.2243 |
| INHTRFPQVEK                             | 1369.6             | 2            | 2.8222 | 0.1963 |
| INISEGNCPER                             | 1232.3             | 2            | 2.8782 | 0.1132 |



| Peptide Sequence                | Peptide mass (m/z) | Charge State | Xcorr  | DelCn2 |
|---------------------------------|--------------------|--------------|--------|--------|
| INKAVSEEQQPALK                  | 1555.8             | 2            | 3.6178 | 0.2129 |
| INKELANIR                       | 1071.3             | 2            | 2.9517 | 0.1463 |
| INKELSDLAR                      | 1159.3             | 2            | 3.0154 | 0.1501 |
| INKESLLPVAK                     | 1212.5             | 2            | 3.8371 | 0.2687 |
| INKLHSEGDQLLAAEHPGR             | 2086.3             | 3            | 6.3159 | 0.5209 |
| INKLMNESLMLVTALNPHIGYDK         | 2616.1             | 2            | 5.7836 | 0.472  |
| INKLNSIKDVEQK                   | 1529.8             | 2            | 4.909  | 0.2443 |
| INKYLDEIVKEVEAK                 | 1792.1             | 3            | 3.6554 | 0.2728 |
| INLAEDVLAWEHER                  | 1695.9             | 2            | 4.4763 | 0.3429 |
| INLESEPQEFKPIGTAHNR             | 2181.4             | 3            | 3.9868 | 0.2409 |
| INLKPSYLVVPQTGFHHEK             | 2208.5             | 3            | 4.311  | 0.2545 |
| INLKRPTAGSQFK                   | 1557.8             | 2            | 3.6773 | 0.2707 |
| INLPAPNPDHVGGYK                 | 1592.8             | 2            | 2.9902 | 0.2914 |
| INLQGDIVDR                      | 1143.3             | 2            | 2.5709 | 0.1324 |
| INLRKRRDSLILGGVIGICTILLLLYAFH   | 3283.0             | 3            | 3.4246 | 0.2235 |
| INLSLSALGNVISALVDGK             | 1885.2             | 2            | 5.4556 | 0.5038 |
| INLSLSTLGNVISALVDGK             | 1915.2             | 2            | 4.8032 | 0.5274 |
| INMNGINNSSGMVDAR                | 1693.9             | 2            | 3.2821 | 0.1755 |
| INMNGVNSSNGVVDPR                | 1673.8             | 2            | 3.5129 | 0.3067 |
| INNPELLGQYMIDAGTEFGPGTAYGNALIK  | 3169.6             | 3            | 7.4724 | 0.5785 |
| INNVIDNLIVAPGTFEVQIEEVR         | 2583.9             | 3            | 5.4705 | 0.3739 |
| INNVNKALDFIASK                  | 1547.8             | 2            | 3.9156 | 0.3008 |
| INNVAEGENEVNNELANR              | 2097.2             | 2            | 5.443  | 0.5092 |
| INPDEREEMK                      | 1261.4             | 2            | 2.4797 | 0.1778 |
| INPDGSQSVVEVPYAR                | 1731.9             | 3            | 4.3646 | 0.355  |
| INQDPQVMLAPLISIALK              | 1965.4             | 2            | 4.8385 | 0.3581 |
| INQDPQVMLAPLISIALKVSQQLQER      | 2806.3             | 3            | 3.6738 | 0.2528 |
| INQMATAPDSQR                    | 1332.5             | 2            | 2.9815 | 0.2634 |
| INRLPTPIAGLDNIILFLR             | 2150.6             | 3            | 4.1008 | 0.3051 |
| INSGGKLPNFGFVVFDDSEPVQK         | 2495.8             | 2            | 4.296  | 0.3715 |
| INSHLP SHIR                     | 1174.3             | 2            | 2.4883 | 0.2101 |
| INSQNQPTGIHREPPPPPFVSVNK        | 2555.8             | 3            | 3.999  | 0.2836 |
| INSTATPDQDRDKIK                 | 1702.8             | 2            | 2.6983 | 0.1324 |
| INSYGYGDHYIHIK                  | 1680.8             | 2            | 4.0004 | 0.3437 |
| INVLAQYQSLLNSYGEPVDDKSATLLQLITK | 3508.0             | 3            | 5.2262 | 0.419  |
| INVNEIFYDLVR                    | 1495.7             | 2            | 4.8055 | 0.3418 |

| Peptide Sequence                    | Peptide mass (m/z) | Charge State | Xcorr  | DelCn2 |
|-------------------------------------|--------------------|--------------|--------|--------|
| INVSGLTTK                           | 933.1              | 2            | 2.6344 | 0.1    |
| INVSGLTTKNLDYVATSIHEAVTK            | 2575.9             | 3            | 3.8906 | 0.1057 |
| INVVNNHQAK                          | 1137.3             | 2            | 2.6171 | 0.1718 |
| INVYYNEAAGNK                        | 1356.5             | 2            | 3.382  | 0.2434 |
| INVYYNEAAGNKYVPR                    | 1872.1             | 2            | 4.7048 | 0.5139 |
| INVYYNEATGGK                        | 1329.4             | 2            | 4.5593 | 0.3748 |
| INVYYNEATGGKYVPR                    | 1845.0             | 2            | 4.8241 | 0.4342 |
| INVYYNEATGNK                        | 1386.5             | 2            | 2.8978 | 0.1954 |
| INVYYNEATGNKYVPR                    | 1902.1             | 2            | 4.9847 | 0.4476 |
| INVYYNESSSQK                        | 1432.5             | 2            | 3.8049 | 0.3456 |
| IPADTFAALKNPNAMLVNLEEPLASTYQDILYQAK | 3865.4             | 3            | 6.3508 | 0.4879 |
| IPAEVLILNSIVLPHKELSR                | 2242.7             | 3            | 3.2575 | 0.2598 |
| IPAFLNVVDIAGLVK                     | 1569.9             | 2            | 5.0986 | 0.3707 |
| IPAYFVTVSDPAVPPGEDPDGR              | 2300.5             | 2            | 4.5006 | 0.5041 |
| IPDEIIDMVKEEVVAK                    | 1829.1             | 2            | 4.6512 | 0.3388 |
| IPDQLVILDMK                         | 1285.6             | 2            | 3.7073 | 0.3074 |
| IPDQLVILDMKHGVEAK                   | 1907.3             | 3            | 3.846  | 0.2031 |
| IPDWFLNR                            | 1061.2             | 2            | 2.9244 | 0.1915 |
| IPEAPAGPPSDFGLFLSDDDPKK             | 2414.7             | 3            | 3.2598 | 0.215  |
| IPELLASGMVDNMTK                     | 1619.9             | 2            | 3.6802 | 0.1593 |
| IPEPQKPQLKPPEDIVR                   | 1985.3             | 3            | 4.3185 | 0.3353 |
| IPEQSVLLLHACAHNPTGVDPREQWK          | 3037.4             | 3            | 4.2241 | 0.1619 |
| IPEVHHISQDPLHYSIASVSASQK            | 2644.9             | 3            | 5.6566 | 0.4191 |
| IPFYGSYTEMDPVIIASEGVEK              | 2446.8             | 2            | 3.0281 | 0.3228 |
| IPGGATLVFEVELLK                     | 1586.9             | 2            | 3.6152 | 0.4212 |
| IPHEPVINSSNVHVGSR                   | 1843.0             | 3            | 3.7108 | 0.3529 |
| IPHLAIHLQR                          | 1198.4             | 2            | 2.6602 | 0.3392 |
| IPIFSAAGLPHNEIAAQICR                | 2122.5             | 3            | 4.0837 | 0.3168 |
| IPIHNEDITYDELVLMMQR                 | 2331.7             | 2            | 3.2528 | 0.3211 |
| IPILYGEVEKLEESAVTVMFDKVQFSNK        | 3215.7             | 3            | 4.8905 | 0.207  |
| IPISLVLR                            | 911.2              | 2            | 2.4095 | 0.2135 |
| IPKEQGFLSFWR                        | 1508.7             | 2            | 3.5584 | 0.3455 |
| IPKEQGVLSFWR                        | 1460.7             | 3            | 4.081  | 0.3251 |
| IPKIQKLLQDFFNKGELNK                 | 2274.7             | 3            | 4.1522 | 0.3044 |
| IPKIQQLVKEFFNKGPEPSR                | 2259.6             | 3            | 3.6314 | 0.2736 |
| IPKNPELV PQNYISDSL AQS VVQH LR      | 2947.3             | 3            | 3.9308 | 0.2533 |

| Peptide Sequence                     | Peptide mass (m/z) | Charge State | Xcorr  | DelCn2 |
|--------------------------------------|--------------------|--------------|--------|--------|
| IPKVQKLLQDFFNDRDLNK                  | 2274.7             | 3            | 4.0486 | 0.3453 |
| IPLSDLTHQISK                         | 1465.7             | 2            | 3.9132 | 0.2969 |
| IPLSDLTHQISKDYGVYLED SGHTLR          | 3072.4             | 3            | 6.0947 | 0.4577 |
| IPLNDLFR                             | 988.2              | 2            | 2.9573 | 0.1511 |
| IPLPGAEMLEEEPLYVNAK                  | 2114.4             | 2            | 3.4621 | 0.3177 |
| IPNFLHLTPVAIKK                       | 1592.0             | 2            | 4.2339 | 0.3257 |
| IPNFWVTFVNHPQVSALLGEEDEEALHYLTR      | 3728.1             | 3            | 6.0847 | 0.522  |
| IPNIYAIGDVVAGPMLAHK                  | 1980.4             | 3            | 5.3904 | 0.4858 |
| IPNQFQSDPPAPSDK                      | 1641.8             | 2            | 3.3322 | 0.2673 |
| IPPGDLVFDPDQRGDVVL PFQR              | 2481.8             | 3            | 3.6065 | 0.2754 |
| IPPYHYIHVLDQNSNVS R                  | 2153.4             | 2            | 5.6634 | 0.5354 |
| IPPYHYIHVLDQNSNVS RVEVGPK            | 2763.1             | 3            | 4.0482 | 0.3841 |
| IPQNPSPTHQQQNAPVTVIQSK               | 2550.8             | 3            | 5.0607 | 0.4279 |
| IPQSTLSEFYPR                         | 1438.6             | 2            | 2.8259 | 0.249  |
| IPRDLYEDELVPLFEK                     | 1977.2             | 2            | 3.9432 | 0.2157 |
| IPSAVGYQPTLATDMGTMQER                | 2267.6             | 2            | 5.5867 | 0.5489 |
| IPSLFEIVVRPTGQLAEK                   | 1998.4             | 2            | 3.1432 | 0.1941 |
| IPTAGIYGASYVPFAAPATATIATLQK          | 2695.1             | 3            | 5.5209 | 0.4145 |
| IPTEAPQLELK                          | 1239.4             | 2            | 2.8048 | 0.29   |
| IPTPVIHTK                            | 1006.2             | 2            | 2.5039 | 0.1593 |
| IPTPVIHTKH                           | 1143.4             | 2            | 2.6095 | 0.2613 |
| IPTRPFEEGKK                          | 1302.5             | 2            | 2.8988 | 0.1489 |
| IPVDEEAFVIDFKPR                      | 1776.0             | 3            | 4.5314 | 0.4524 |
| IPVDTYNNILTVLK                       | 1603.9             | 2            | 3.3554 | 0.2466 |
| IPVHPNDHVNK                          | 1270.4             | 2            | 3.6012 | 0.3735 |
| IPVQALLHLR                           | 1160.4             | 2            | 3.8194 | 0.2645 |
| IPVQLQR                              | 854.0              | 2            | 2.5923 | 0.1224 |
| IPVTDEEQTNVPYIYAIGDILEDKVELTPVAIQAGR | 3972.4             | 3            | 7.3189 | 0.5186 |
| IPWFQYPIIYDIR                        | 1725.0             | 2            | 4.491  | 0.3858 |
| IPWTAASSQLKEHFAQFGHVR                | 2411.7             | 3            | 3.9006 | 0.226  |
| IPYAPSGEIPK                          | 1172.4             | 2            | 2.7267 | 0.1737 |
| IPYLPITNFNQNWQDGK                    | 2049.3             | 2            | 4.7806 | 0.4228 |
| IQAAASTPTNATAASDANTGDR               | 2105.2             | 3            | 3.6505 | 0.2451 |
| IQAAKETLILLK                         | 1454.8             | 2            | 3.5104 | 0.2046 |
| IQAGDPVAR                            | 927.0              | 2            | 2.4495 | 0.1073 |
| IQAGEGETAVLNQLQEKNHTLQEQVTQLTEK      | 3479.8             | 3            | 4.9512 | 0.3414 |

| Peptide Sequence                     | Peptide mass (m/z) | Charge State | Xcorr  | DelCn2 |
|--------------------------------------|--------------------|--------------|--------|--------|
| IQAGEVSQPSKEQLEK                     | 1772.0             | 2            | 5.29   | 0.2593 |
| IQAKPKPKPNQNLSEASGK                  | 2036.3             | 3            | 3.3378 | 0.3262 |
| IQALAEETAQNLKR                       | 1585.8             | 2            | 3.3793 | 0.2725 |
| IQALQQQAEDAEDR                       | 1615.7             | 2            | 4.7019 | 0.467  |
| IQALQQQAEDAEDRAQGLQR                 | 2269.4             | 2            | 4.3507 | 0.2306 |
| IQASTMAFK                            | 997.2              | 1            | 2.4307 | 0.212  |
| IQDALSTVLQYAEDVLSGK                  | 2051.3             | 2            | 6.3115 | 0.5445 |
| IQDALSTVLQYAEDVLSGKVSADNTVGR         | 2951.2             | 3            | 4.6928 | 0.4541 |
| IQDKEGIPDPKQR                        | 1524.7             | 3            | 4.226  | 0.2351 |
| IQDLEHHLGLALNEVQAAK                  | 2100.4             | 3            | 4.0392 | 0.2304 |
| IQDLPPVDLSLVNKDENAIYFLGNSLGLQPK      | 3412.9             | 3            | 6.0068 | 0.3748 |
| IQDVGLVPMGGVMSGAVPAAAAQEAVEEDIPIAK   | 3335.8             | 3            | 3.8975 | 0.2479 |
| IQDVGLVPMGGVMSGAVPAAAAQEAVEEDIPIAKER | 3621.1             | 3            | 3.4478 | 0.2858 |
| IQEAGTEVVK                           | 1074.2             | 1            | 1.693  | 0.1237 |
| IQEAGTEVVKAK                         | 1273.5             | 2            | 3.939  | 0.2648 |
| IQEAKDVYKEHFQDDVFNEK                 | 2483.7             | 3            | 5.0835 | 0.2808 |
| IQEELSALRAEHQQDSEDLFK                | 2487.7             | 3            | 3.202  | 0.1532 |
| IQEELSALRAEHQQDSEDLFKK               | 2615.8             | 3            | 3.9211 | 0.1764 |
| IQEENVIPR                            | 1098.2             | 2            | 3.136  | 0.1707 |
| IQEGVESLAGYADIFLR                    | 1882.1             | 2            | 5.2609 | 0.4724 |
| IQEGVFDINNEANGIK                     | 1761.9             | 2            | 5.3828 | 0.442  |
| IQEIIQLDVTTSEYEK                     | 2039.2             | 2            | 6.7781 | 0.4966 |
| IQEIIQLDVTTSEYEKEK                   | 2296.5             | 2            | 5.3806 | 0.3904 |
| IQEIIQLDVTTSEYEKEKLNER               | 2809.1             | 3            | 5.0853 | 0.3516 |
| IQEKKDEDIAR                          | 1345.5             | 2            | 3.1815 | 0.145  |
| IQELEDLLAK                           | 1172.4             | 2            | 2.935  | 0.1165 |
| IQEPNTFPAILR                         | 1399.6             | 2            | 3.2458 | 0.1908 |
| IQEQVQQTLAR                          | 1314.5             | 2            | 3.8585 | 0.2203 |
| IQESHPELR                            | 1109.2             | 2            | 3.1156 | 0.2197 |
| IQEVADQLK                            | 1173.3             | 2            | 3.1296 | 0.2002 |
| IQEVGEPSSKEEK                        | 1373.5             | 2            | 3.7366 | 0.2214 |
| IQEVGEPSSKEEKAVAK                    | 1743.0             | 2            | 3.9846 | 0.3277 |
| IQFHNVKPEYLDAYNSLTEAVLPK             | 2791.2             | 3            | 5.8818 | 0.505  |
| IQFKPDDGISPER                        | 1502.7             | 3            | 3.9868 | 0.3032 |
| IQFKPDDGTTPER                        | 1504.6             | 2            | 3.4411 | 0.2888 |
| IQFKQDDGTGPEK                        | 1463.6             | 2            | 4.3542 | 0.2892 |

| Peptide Sequence                 | Peptide mass (m/z) | Charge State | Xcorr  | DelCn2 |
|----------------------------------|--------------------|--------------|--------|--------|
| IQFRLPDGSSFTNQFSPDAPLEEAR        | 2824.1             | 3            | 5.1272 | 0.3011 |
| IQFTSLYHKKEAPASPLRPLYPQISPLK     | 3225.7             | 3            | 4.7438 | 0.4188 |
| IQGAQKEPGNK                      | 1170.3             | 2            | 2.7386 | 0.1982 |
| IQGEYKYTQVGPDHNR                 | 1906.0             | 3            | 3.7892 | 0.277  |
| IQGLTVEQAEAVVR                   | 1513.7             | 2            | 5.0286 | 0.445  |
| IQGSEHLYNDHGVIVDYNTTDLIR         | 2871.1             | 3            | 3.5153 | 0.1486 |
| IQHALETIHHLK                     | 1440.7             | 3            | 3.5968 | 0.307  |
| IQHAVQLATEPLEK                   | 1577.8             | 2            | 3.8069 | 0.2761 |
| IQHILCTGNLCTKESYDYLK             | 2343.7             | 3            | 3.2612 | 0.1567 |
| IQHPSNVLHFFNAPLEVTEENFFEICDELGVK | 3718.1             | 3            | 5.173  | 0.4606 |
| IQHSITAQDHQPTPDSCIISMVVGQLK      | 2948.4             | 3            | 3.7834 | 0.287  |
| IQHVVEAVRQEK                     | 1436.6             | 2            | 3.4016 | 0.2013 |
| IQIAPDSGGLPER                    | 1353.5             | 2            | 3.2876 | 0.162  |
| IQIFPVDSAIDTISPLNQK              | 2100.4             | 2            | 4.3213 | 0.3797 |
| IQIGNTYEGRPIYVLK                 | 1865.2             | 2            | 3.999  | 0.3602 |
| IQIGTQAIERAPSYIEIFGR             | 2263.6             | 3            | 3.5216 | 0.125  |
| IQIPRPDDPSNQIK                   | 1621.8             | 2            | 3.3253 | 0.1595 |
| IQIWDTAGQER                      | 1317.4             | 2            | 2.8323 | 0.2058 |
| IQKDINELNLPK                     | 1425.7             | 2            | 3.7914 | 0.1835 |
| IQKEALGGQALYPHVLVK               | 1965.3             | 3            | 4.8826 | 0.4289 |
| IQKETALLQELEDLELGI               | 2056.3             | 2            | 3.0036 | 0.1376 |
| IQKGDSKKDDEENYLDLFSHK            | 2510.7             | 3            | 5.5701 | 0.3235 |
| IQKGVFEVKSTNGDTFLGGEDFDQALLR     | 3086.4             | 3            | 4.8333 | 0.2923 |
| IQKLLQDFFNGKELNK                 | 1936.2             | 2            | 3.585  | 0.2002 |
| IQLGKDNQHQGSYSEGAQMNGIQPEEIGR    | 3186.4             | 3            | 5.7416 | 0.3597 |
| IQLVEEELDR                       | 1244.4             | 2            | 3.6841 | 0.2869 |
| IQLVEEELDRAQER                   | 1728.9             | 2            | 3.3311 | 0.1519 |
| IQLWDTAGQER                      | 1317.4             | 2            | 3.0796 | 0.1927 |
| IQMSNLMNQAR                      | 1306.5             | 2            | 3.4735 | 0.2247 |
| IQNDAGVR                         | 872.9              | 2            | 2.6635 | 0.1014 |
| IQNGAQQIR                        | 957.1              | 2            | 2.8868 | 0.2128 |
| IQNLEALLQK                       | 1170.4             | 2            | 3.2563 | 0.1906 |
| IQNNDNVGKPK                      | 1227.4             | 2            | 3.2751 | 0.1157 |
| IQPDTIIQVWREDIPVNYMKELELVTK      | 3272.8             | 3            | 3.653  | 0.1271 |
| IQPEEKPVVSPAVTK                  | 1752.0             | 2            | 2.6685 | 0.1172 |
| IQPFQNLTLHPASSSLHYSLQLFEGMK      | 3088.5             | 3            | 3.7666 | 0.2144 |

| Peptide Sequence                  | Peptide mass (m/z) | Charge State | Xcorr  | DelCn2 |
|-----------------------------------|--------------------|--------------|--------|--------|
| IQQDADSVITVGR                     | 1402.5             | 2            | 3.838  | 0.3321 |
| IQQEIAVQNPLVSER                   | 1724.9             | 2            | 4.6102 | 0.3544 |
| IQQIAEGEKVK                       | 1243.4             | 2            | 2.9975 | 0.1257 |
| IQQIAEGEKVKQVLLAQAEAEKIR          | 2694.1             | 3            | 4.6332 | 0.3856 |
| IQQIETTLNILDAK                    | 1600.8             | 2            | 3.944  | 0.106  |
| IQQLAISGLK                        | 1071.3             | 2            | 2.7971 | 0.1823 |
| IQQLQEILQDLQK                     | 1597.8             | 2            | 3.6692 | 0.1247 |
| IQQLTALGAAQATAKA                  | 1556.8             | 2            | 4.6799 | 0.4396 |
| IQQLVKEFFNGKEPSR                  | 1921.2             | 2            | 4.7773 | 0.4115 |
| IQQLVQDIASLTLLLEISDLNELLK         | 2711.1             | 2            | 3.8814 | 0.4166 |
| IQQLVQDIASLTLLLEISDLNELLKK        | 2839.3             | 3            | 3.988  | 0.3633 |
| IQQNTFTR                          | 1008.1             | 2            | 2.7193 | 0.2462 |
| IQQQQPPPGEK                       | 1250.4             | 2            | 3.0324 | 0.2128 |
| IQRPPEDSIQPYEK                    | 1700.9             | 2            | 4.2547 | 0.3007 |
| IQRPPEDSIQPYEKIK                  | 1942.2             | 3            | 5.0275 | 0.2392 |
| IQSIPLVIGQFLEAVDQNTAIVGSTTGSNYYVR | 3556.0             | 3            | 5.226  | 0.537  |
| IQSLELDKLGTSSELLAK                | 1972.3             | 3            | 4.324  | 0.2956 |
| IQSLPDL SRLPNVTGSHMHLPFAGDIYSED   | 3311.7             | 3            | 3.9189 | 0.1924 |
| IQSQNDREK                         | 1118.2             | 2            | 2.7076 | 0.1059 |
| IQSSGGPLQITMK                     | 1360.6             | 2            | 2.8813 | 0.2515 |
| IQSSHNFQLESV NK                   | 1631.8             | 2            | 3.4581 | 0.1453 |
| IQSTVTQPGGK                       | 1116.3             | 2            | 2.9154 | 0.1039 |
| IQTEIIEQEDLIK                     | 1572.8             | 2            | 3.2907 | 0.1886 |
| IQTKEPLPTLPLGR                    | 1563.9             | 2            | 2.9219 | 0.1892 |
| IQTLSQLLLNLQAVIAHQDSYVETQR        | 2983.4             | 3            | 5.4228 | 0.3318 |
| IQTQPGYANTLR                      | 1362.5             | 2            | 4.0402 | 0.3181 |
| IQTQPGYANTLRDAAPK                 | 1845.0             | 2            | 3.5169 | 0.2733 |
| IQTTTTTQAVQGR                     | 1405.5             | 2            | 3.3708 | 0.3165 |
| IQTYLQSTKPIIDL YEEMGK             | 2371.7             | 3            | 4.9045 | 0.4396 |
| IQTYLQSTKPIIDL YEEMGKVK           | 2599.0             | 3            | 4.329  | 0.3498 |
| IQVLGSLVSLEM GK                   | 1474.8             | 2            | 4.9556 | 0.485  |
| IQVLQQQADDAEER                    | 1643.7             | 2            | 5.0691 | 0.427  |
| IQVLQQQADDAEERAER                 | 2000.1             | 2            | 4.5584 | 0.3251 |
| IQVLVEPDHFK                       | 1325.5             | 2            | 3.3004 | 0.1698 |
| IQVNHPAVLR                        | 1147.4             | 2            | 2.7821 | 0.2029 |
| IQVRLGEHNIEVLEGNEQFINAAK          | 2723.0             | 3            | 3.8476 | 0.1419 |

| Peptide Sequence                        | Peptide mass (m/z) | Charge State | Xcorr  | DelCn2 |
|-----------------------------------------|--------------------|--------------|--------|--------|
| IQVSSEKEAAPDAGAEPITADSDPAYSSK           | 2936.1             | 3            | 5.3816 | 0.3623 |
| IQVTPPGFQLVFLPFADDK                     | 2133.5             | 2            | 4.3857 | 0.3403 |
| IQVTPPGFQLVFLPFADDKR                    | 2289.7             | 2            | 3.7251 | 0.272  |
| IQVTPPGFQLVFLPFADDKRK                   | 2417.8             | 2            | 3.7466 | 0.364  |
| IQVWHAHR                                | 1176.3             | 2            | 3.231  | 0.3269 |
| IQVWHEHR                                | 1234.3             | 2            | 3.0514 | 0.3026 |
| IQVYSRHPAENGK                           | 1499.7             | 2            | 3.9433 | 0.285  |
| IQYAKTDSIIAK                            | 1466.7             | 2            | 3.9515 | 0.3237 |
| IQYAKTDSIISK                            | 1482.7             | 2            | 4.0426 | 0.2605 |
| IQYPGIAQSIQSDVQNLLAVLK                  | 2399.8             | 3            | 3.7112 | 0.2152 |
| IQYQLVDISQDNALRDEM                      | 2308.6             | 2            | 3.4439 | 0.1917 |
| IRAIENIDTLTNLESLFLGK                    | 2261.6             | 3            | 4.2248 | 0.3354 |
| IRAQTEGINISEEALNHLGEIGTK                | 2594.9             | 3            | 5.8683 | 0.446  |
| IRDAYTHPQFVTDVMKPLQIENIIDQEVQTLSSGGELQR | 4384.9             | 3            | 6.816  | 0.4566 |
| IRDIDAATEAK                             | 1203.3             | 2            | 2.6851 | 0.2381 |
| IRDPNQGGKDITEEIMSGAR                    | 2188.4             | 2            | 4.6056 | 0.3761 |
| IRDTPEDIVLEAPASGLAFHPAR                 | 2476.8             | 3            | 3.4779 | 0.2466 |
| IRDVINVFHHLR                            | 1519.8             | 2            | 2.867  | 0.2856 |
| IRDVTNNQEK                              | 1217.3             | 2            | 2.7065 | 0.1131 |
| IREDLPNLESSEETEIQINKHFHNTLEHLR          | 3530.8             | 3            | 4.4471 | 0.3607 |
| IREEFPDRIMNTFSVMPSK                     | 2395.8             | 3            | 3.5521 | 0.2299 |
| IREESGAR                                | 918.0              | 2            | 2.6383 | 0.1069 |
| IREESNTKIDLPAENSNSETIIITGK              | 2874.2             | 3            | 3.8325 | 0.1129 |
| IREEYPDR                                | 1078.2             | 2            | 2.8019 | 0.1791 |
| IREEYPDRIMNTFSVMPSK                     | 2411.8             | 2            | 3.4099 | 0.2958 |
| IREEYPDRIMNTFSVVPSK                     | 2379.7             | 2            | 3.9897 | 0.3243 |
| IREGMAALQSDPWQQELR                      | 2292.6             | 2            | 5.5603 | 0.5067 |
| IREHVPQLLLLLLTTAGQSEDSYLQAANALTR        | 3322.8             | 3            | 6.7269 | 0.4731 |
| IREIADGLCLEVEGK                         | 1645.9             | 2            | 3.8105 | 0.406  |
| IRELEEAMAGER                            | 1404.6             | 2            | 4.5357 | 0.3578 |
| IRELESQISELQEDLESER                     | 2304.5             | 2            | 5.9611 | 0.4243 |
| IRELESQISELQEDLESERASR                  | 2618.8             | 3            | 3.9242 | 0.3058 |
| IRELGSLPQEAPEFYQTLQSLK                  | 2451.8             | 3            | 4.4838 | 0.327  |
| IRELQQQIEDLQK                           | 1641.9             | 2            | 3.8682 | 0.2305 |
| IRELTAVVQKR                             | 1313.6             | 2            | 3.1085 | 0.1266 |
| IRETTDFKVDTK                            | 1453.6             | 2            | 3.2074 | 0.2934 |

| Peptide Sequence              | Peptide mass (m/z) | Charge State | Xcorr  | DelCn2 |
|-------------------------------|--------------------|--------------|--------|--------|
| IREYFGGFGEVESIELPMDNK         | 2431.7             | 3            | 4.9881 | 0.2655 |
| IRFHDFLGDSWGILFSHPR           | 2301.6             | 3            | 5.2469 | 0.3321 |
| IRFLILPDMLK                   | 1359.7             | 2            | 3.5504 | 0.2008 |
| IRFQESEERP                    | 1419.6             | 3            | 4.0154 | 0.224  |
| IRGETLGIIGLGR                 | 1355.6             | 2            | 3.5009 | 0.2753 |
| IRGETLGLIGFGR                 | 1389.6             | 2            | 2.4398 | 0.2369 |
| IRGQEKGPYPQAEALLAEAMLK        | 2471.9             | 3            | 3.799  | 0.2455 |
| IRGTSYQSPHGIPIDLLDR           | 2139.4             | 3            | 4.6522 | 0.3623 |
| IRHNEQNLADVTQQAGLVK           | 2335.6             | 3            | 3.5225 | 0.2929 |
| IRIDAMHGVVGPYVKK              | 1784.2             | 3            | 4.2122 | 0.3588 |
| IRIDSLSAQLSQLQK               | 1701.0             | 2            | 4.6723 | 0.3059 |
| IRIFDLGR                      | 990.2              | 2            | 2.6559 | 0.2072 |
| IRKPTLDKPSPEFVK               | 1857.2             | 2            | 3.5368 | 0.2192 |
| IRLEETLEQLAK                  | 1443.7             | 2            | 3.8204 | 0.2435 |
| IRLQAYHTQTTPLIEYYR            | 2267.6             | 3            | 3.8899 | 0.2711 |
| IRNEKGEIEQER                  | 1501.6             | 2            | 3.8316 | 0.3281 |
| IRNELMQSLNQDSNSNFKDTLLK       | 2710.0             | 3            | 5.9661 | 0.4475 |
| IRNGENGIHFLNR                 | 1653.9             | 3            | 3.9878 | 0.2992 |
| IRNPWGEVEWTGR                 | 1600.8             | 2            | 2.9168 | 0.2143 |
| IRPFVAVAVLR                   | 1213.5             | 2            | 3.1397 | 0.2756 |
| IRPTAVTLEHVPK                 | 1461.7             | 3            | 4.5334 | 0.3109 |
| IRPTVQEDGGDVIIYKGFEDGIVQLK    | 2778.1             | 3            | 4.0153 | 0.2026 |
| IRQAEEQIEHLQR                 | 1650.8             | 2            | 4.371  | 0.3547 |
| IRQAETLEQVR                   | 1343.5             | 2            | 3.3288 | 0.1638 |
| IRSIEALLEAGQAR                | 1527.8             | 2            | 3.9947 | 0.3023 |
| IRSLQEQADAAEER                | 1616.7             | 2            | 2.8686 | 0.116  |
| IRSQIGNTESELKK                | 1603.8             | 2            | 3.7591 | 0.3915 |
| IRSQIGNTESELKKLAEENPDLQEAYIAK | 3289.6             | 3            | 7.4291 | 0.5265 |
| IRTSTPTGHGASPAKQDELVISAR      | 2493.8             | 2            | 2.6191 | 0.1149 |
| IRVDVADQAQDKDRDDR             | 2016.1             | 3            | 3.3224 | 0.2292 |
| IRVESLLVTAISK                 | 1429.7             | 2            | 4.0774 | 0.3976 |
| IRWNDGLDQYRLTPELEK            | 2231.5             | 3            | 3.4464 | 0.2437 |
| IRYESGDHVAVYPANDSALVNQLGK     | 2718.0             | 3            | 5.7483 | 0.3536 |
| IRYESLTDPSKLDGK               | 1810.0             | 2            | 4.1405 | 0.2954 |
| IRYESLTDPSKLDGKELHINLIPNKQDR  | 3381.8             | 3            | 4.6135 | 0.4225 |
| ISAEGGEQVER                   | 1175.2             | 2            | 4.153  | 0.2369 |



| Peptide Sequence                | Peptide mass (m/z) | Charge State | Xcorr  | DelCn2 |
|---------------------------------|--------------------|--------------|--------|--------|
| ISAHQGAQVDSR                    | 1269.3             | 2            | 2.7227 | 0.2061 |
| ISALNIVGDLLR                    | 1284.5             | 2            | 3.6051 | 0.321  |
| ISALQSAGVVVSMSPAQLGTTIYKEFEK    | 2956.4             | 3            | 6.356  | 0.5059 |
| ISANENSLAVR                     | 1174.3             | 2            | 3.1256 | 0.27   |
| ISAQDAK                         | 732.8              | 1            | 1.9325 | 0.1037 |
| ISASGPESLLGGPGGASAAPAAGSK       | 2111.3             | 2            | 5.0913 | 0.4378 |
| ISASLLDSR                       | 962.1              | 2            | 3.1933 | 0.2824 |
| ISASSATREDELMA SLSDFKFMAQ GK    | 2935.3             | 3            | 3.3097 | 0.1512 |
| ISATSIFFESMPYK                  | 1621.9             | 2            | 3.996  | 0.3009 |
| ISATSIFFESMPYKLNPK              | 2074.4             | 2            | 4.3454 | 0.3836 |
| ISAVESQPSR                      | 1074.2             | 2            | 3.2688 | 0.1646 |
| ISAVSVAER                       | 932.1              | 2            | 2.5281 | 0.1526 |
| ISCEP GTNAYR                    | 1211.3             | 2            | 3.353  | 0.3109 |
| ISDAELEAELEKLSLSEGGLVPSSK       | 2602.9             | 3            | 4.1347 | 0.2268 |
| ISDEDWDIIHR                     | 1399.5             | 2            | 3.9805 | 0.3185 |
| ISDLHRESVDHLTIPSR               | 1976.2             | 3            | 4.3742 | 0.2973 |
| ISDSEGFKANLSLLR                 | 1650.9             | 3            | 3.8367 | 0.3543 |
| ISDSVLVDIKDTEPLIQ TAK           | 2186.5             | 2            | 4.5401 | 0.2875 |
| ISEDKNPDYR                      | 1237.3             | 2            | 2.7437 | 0.1434 |
| ISEEDELDTK                      | 1179.2             | 2            | 3.4572 | 0.3365 |
| ISEEDELDTKLTR                   | 1549.7             | 2            | 4.514  | 0.321  |
| ISEHVEEAKK                      | 1170.3             | 2            | 3.3197 | 0.2015 |
| ISEIEDAAFLAR                    | 1335.5             | 2            | 4.1479 | 0.3535 |
| ISEKEEV TTR                     | 1192.3             | 2            | 3.3401 | 0.2854 |
| ISEKEEVT TREVSGIK               | 1806.0             | 2            | 4.497  | 0.3358 |
| ISELDAFLKEPALNEANLSNLK          | 2430.7             | 3            | 4.0551 | 0.1742 |
| ISELGAGNGGVVFK                  | 1348.5             | 2            | 2.5821 | 0.1396 |
| ISELGAGNGGVVTK                  | 1302.5             | 2            | 2.9062 | 0.2242 |
| ISENYSKSDIENADESSSSILKPLISPAAER | 3467.7             | 3            | 5.3891 | 0.3377 |
| ISEQFTAMFR                      | 1230.4             | 2            | 3.8044 | 0.3737 |
| ISEQSDAK                        | 877.9              | 2            | 2.6422 | 0.1352 |
| ISEQSDAKLK                      | 1119.3             | 2            | 2.7512 | 0.125  |
| ISEQSDAKLKEIVTNFLAGFEA          | 2411.7             | 3            | 4.2481 | 0.3626 |
| ISEQTYQLSR                      | 1225.3             | 2            | 3.5396 | 0.3256 |
| ISERTPSALAIL ENANVLAR           | 2139.4             | 3            | 4.8133 | 0.3155 |
| ISESAKQELIDFK                   | 1508.7             | 2            | 3.5547 | 0.1219 |

| Peptide Sequence                  | Peptide mass (m/z) | Charge State | Xcorr  | DelCn2 |
|-----------------------------------|--------------------|--------------|--------|--------|
| ISESAKQELIDFKTR                   | 1766.0             | 3            | 4.2108 | 0.3162 |
| ISESGQFSDGLEDR                    | 1540.6             | 2            | 4.2027 | 0.3478 |
| ISESGQFSDGLEDRGLLESSTR            | 2384.5             | 3            | 3.5097 | 0.2751 |
| ISFAKEPHVEQITR                    | 1655.9             | 2            | 3.9907 | 0.3828 |
| ISFDEYWTLIGGITGPIAK               | 2082.4             | 2            | 2.4111 | 0.1389 |
| ISFDLAEYTADV DGVGTLR              | 2043.2             | 2            | 2.6179 | 0.1714 |
| ISFKFDHLR                         | 1163.4             | 2            | 3.0782 | 0.2112 |
| ISFLENNLEQLTK                     | 1549.8             | 2            | 4.6617 | 0.3466 |
| ISFPAIQAAPSFSNSFPQIFR             | 2326.6             | 3            | 5.3647 | 0.4835 |
| ISFSNIIIDMK                       | 1255.5             | 2            | 3.767  | 0.364  |
| ISFYMTNYGEEGTHVGSAAALDNTDLVFGQYR  | 3528.8             | 3            | 4.672  | 0.3364 |
| ISGASEKDIVHSGLAYTMER              | 2165.4             | 2            | 5.8896 | 0.5298 |
| ISGDKKLEEIPK                      | 1357.6             | 2            | 3.3814 | 0.1455 |
| ISGETIFVTAPHEATAGIIGVNR           | 2354.6             | 2            | 4.6301 | 0.3956 |
| ISGGKENTASSK                      | 1179.3             | 2            | 3.1998 | 0.2244 |
| ISGGSVVEMQGDDEMTR                 | 1696.9             | 2            | 5.0299 | 0.5088 |
| ISGIKDFSWSPGGNIIAFWVPEDKDIPAR     | 3217.6             | 3            | 3.9042 | 0.2266 |
| ISGLGLTPEQK                       | 1143.3             | 2            | 3.0759 | 0.1847 |
| ISGLIYEETR                        | 1181.3             | 2            | 3.9756 | 0.3909 |
| ISGLIYEETRGVLK                    | 1578.8             | 2            | 4.0969 | 0.3171 |
| ISGLIYEETRGVLKVFLENVIR            | 2550.0             | 3            | 5.9181 | 0.4493 |
| ISGLIYEETRGVLKVFLENVIRDAVITYTEHAK | 3666.2             | 3            | 5.4717 | 0.5204 |
| ISGLQYSIPDTENQTLNYGK              | 2242.4             | 3            | 3.7303 | 0.2568 |
| ISGNNKGVSPAPIHLK                  | 1690.9             | 2            | 3.2281 | 0.2442 |
| ISGSILNELIGLVR                    | 1484.8             | 2            | 4.6589 | 0.3555 |
| ISHELDSASSEVN                     | 1388.4             | 2            | 2.9716 | 0.2606 |
| ISHGEVLEWQK                       | 1326.5             | 2            | 3.0216 | 0.1408 |
| ISHLSGSGSGDER                     | 1302.3             | 2            | 3.2583 | 0.2577 |
| ISHLVLPVQPENALKR                  | 1815.2             | 2            | 4.6197 | 0.3776 |
| ISHMVIEEVNFMQNHLEIEK              | 2441.8             | 3            | 3.4142 | 0.131  |
| ISHYEKEYILSSLR                    | 1739.0             | 2            | 3.8194 | 0.3384 |
| ISIEMHGTLEDQLSHLR                 | 1980.2             | 3            | 5.6816 | 0.4115 |
| ISIEMNGTLEDQLSHLK                 | 1929.2             | 2            | 3.7208 | 0.33   |
| ISIENSEEALTVHAPFPAHPASR           | 2545.8             | 3            | 4.1056 | 0.4143 |
| ISINQALQHAFIQEKI                  | 1854.1             | 3            | 3.7072 | 0.2253 |
| ISITEGIER                         | 1018.1             | 2            | 2.5167 | 0.2185 |

| Peptide Sequence                 | Peptide mass (m/z) | Charge State | Xcorr  | DelCn2 |
|----------------------------------|--------------------|--------------|--------|--------|
| ISIVEALTLLNNHK                   | 1565.8             | 2            | 3.8439 | 0.3484 |
| ISKEEAMR                         | 964.1              | 2            | 2.7227 | 0.1409 |
| ISKEVLAGRPLFPVHLCHNCAVEFNFGQK    | 3255.8             | 3            | 5.4499 | 0.413  |
| ISKFDLAVTSQSK                    | 1571.8             | 2            | 2.7007 | 0.2654 |
| ISKFFGKELSTTLNADEAVTR            | 2328.6             | 3            | 3.7873 | 0.2426 |
| ISKGANPVEIR                      | 1184.4             | 2            | 2.7968 | 0.1346 |
| ISKIENLSNLHQLQMLELGSNR           | 2538.9             | 3            | 6.589  | 0.4626 |
| ISKLEQQMAK                       | 1176.4             | 2            | 3.5413 | 0.1809 |
| ISLADIAQKLQLDSPEDAEIFIVAK        | 2616.0             | 3            | 4.4375 | 0.2836 |
| ISLAPTDVKELSTKEPGRITLEPQELAR     | 2980.4             | 3            | 3.7767 | 0.2811 |
| ISLGLPVGAVINCADNTGAK             | 1914.2             | 2            | 4.4207 | 0.4012 |
| ISLGMPVGPNAHK                    | 1321.6             | 2            | 3.2303 | 0.2944 |
| ISLPLPNFSSLNLR                   | 1571.8             | 3            | 4.856  | 0.4062 |
| ISLPLPNFSSLNLRRETNLDSLPLVDTHSK   | 3222.6             | 3            | 3.5906 | 0.4008 |
| ISLPLPNFSSLNLRRETNLDSLPLVDTHSKR  | 3378.8             | 3            | 3.3712 | 0.1805 |
| ISLSPEYVFSVSTFR                  | 1733.0             | 2            | 3.5756 | 0.3144 |
| ISLVDLAGSER                      | 1160.3             | 2            | 3.8428 | 0.2934 |
| ISMNNPAKEISYENTQISR              | 2309.6             | 3            | 4.5443 | 0.2878 |
| ISMPDFDLHLK                      | 1316.6             | 2            | 2.7792 | 0.1618 |
| ISMPDVDLHLK                      | 1268.5             | 3            | 3.2092 | 0.3542 |
| ISMPDVDLHLKGP                    | 1550.8             | 2            | 3.7754 | 0.3237 |
| ISMSHEEEPLGTAGPLALAR             | 2080.4             | 2            | 5.8899 | 0.3948 |
| ISNDPSPGYNIEQMAK                 | 1764.9             | 2            | 3.587  | 0.3986 |
| ISNDRLGSGDDISVYVIPLIHGNKLS       | 2784.1             | 3            | 4.0456 | 0.1709 |
| ISNLKEHLASK                      | 1240.4             | 2            | 3.7901 | 0.2219 |
| ISNLPTVK                         | 872.0              | 2            | 2.4983 | 0.1174 |
| ISNLPTVKK                        | 1000.2             | 2            | 2.9318 | 0.146  |
| ISNRPAFMPSEGK                    | 1434.6             | 2            | 3.8006 | 0.3956 |
| ISNSAAYSQSVAPANSALGQTQPSDQDTLVQR | 3235.4             | 3            | 4.0034 | 0.1837 |
| ISPDGEEGYPGELK                   | 1491.6             | 2            | 3.3268 | 0.1409 |
| ISPDRVYINYYDMNAANVGWNNSTFA       | 2997.2             | 3            | 5.4428 | 0.4652 |
| ISPLFGHLDMHSGAQSGPMHGFGLPTSR     | 3140.5             | 3            | 4.3014 | 0.3134 |
| ISQAEEDQQLLGHLLLVAK              | 2235.5             | 2            | 5.4021 | 0.419  |
| ISQEIGNLMKEIETLVEEK              | 2204.5             | 3            | 3.4278 | 0.2676 |
| ISQEKEQQESLALAELELQKK            | 2501.8             | 3            | 5.656  | 0.3266 |
| ISQKDIEQSIK                      | 1289.5             | 2            | 4.9053 | 0.1706 |

| Peptide Sequence                         | Peptide mass (m/z) | Charge State | Xcorr  | DelCn2 |
|------------------------------------------|--------------------|--------------|--------|--------|
| ISQKDIEQSIKSETSGSFEDALLAIVK              | 2938.3             | 3            | 6.7587 | 0.4656 |
| ISQLAAVNR                                | 972.1              | 2            | 2.8277 | 0.1501 |
| ISQLEMAR                                 | 948.1              | 2            | 3.0879 | 0.1979 |
| ISQSGDFLR                                | 1023.1             | 2            | 2.6657 | 0.1555 |
| ISQTYQQQYGR                              | 1372.5             | 2            | 4.0318 | 0.4322 |
| ISREECDKYALQSQQR                         | 1955.1             | 2            | 5.0331 | 0.3861 |
| ISRPGDSDDSR                              | 1205.2             | 2            | 3.0914 | 0.207  |
| ISSADPSGAFR                              | 1108.2             | 2            | 2.8592 | 0.2488 |
| ISSDLDGHPVPK                             | 1265.4             | 2            | 3.4931 | 0.3574 |
| ISSEAHREVMK                              | 1287.5             | 2            | 2.9015 | 0.2342 |
| ISSIQATTAAGSGHPTSCCSAAEIMAVLFFHTMR       | 3499.0             | 3            | 3.6811 | 0.2668 |
| ISSIQSIVPALEIANAHR                       | 1920.2             | 3            | 3.9286 | 0.4138 |
| ISSIQSIVPALEIANAHRKPLVIIAEDVDGEALSTLVNLR | 4267.9             | 3            | 3.8919 | 0.3812 |
| ISSLLEEQFQQGK                            | 1507.7             | 2            | 4.6631 | 0.3792 |
| ISSLRNELEHLQYK                           | 1730.9             | 2            | 2.5098 | 0.2071 |
| ISSSDLSLGHVTR                            | 1372.5             | 2            | 3.3928 | 0.2049 |
| ISSSSFSR                                 | 870.9              | 2            | 2.4168 | 0.1391 |
| ISSTSVKPKPPPVR                           | 1493.8             | 2            | 3.1459 | 0.3304 |
| ISSVSEVMKESK                             | 1324.5             | 2            | 3.5472 | 0.3119 |
| ISTASGDGR                                | 863.9              | 2            | 2.4812 | 0.1153 |
| ISTASGDGRHYCYPHFTCAVDTENIR               | 2915.2             | 3            | 4.47   | 0.2659 |
| ISTKPRDPDNELYFAHGLFSAK                   | 2507.8             | 3            | 4.7084 | 0.3822 |
| ISTLKDETGAIFIDRDPTVFAPILNFLR             | 3164.6             | 3            | 4.3973 | 0.3858 |
| ISTLYYQLGDHELSEVR                        | 2224.5             | 2            | 4.6492 | 0.4075 |
| ISTQLDFASK                               | 1110.2             | 2            | 2.4069 | 0.1832 |
| ISTSLPVLDLIDAIQPGSINYDLLK                | 2700.1             | 3            | 3.9433 | 0.2612 |
| ISTSLPVLDLIDAIQPGSINYDLLKTENLNDDEKLNNAK  | 4299.8             | 3            | 3.6397 | 0.2264 |
| ISTSVKELENFRNLLQNIH                      | 2256.5             | 2            | 3.1373 | 0.2428 |
| ISTVVSSKEVNK                             | 1291.5             | 2            | 2.6841 | 0.1403 |
| ISTYGLPAGGIQPHPQTK                       | 1866.1             | 2            | 3.3198 | 0.3405 |
| ISVADEAQVQK                              | 1188.3             | 2            | 4.1838 | 0.3403 |
| ISVAGVTSSNVGYLAHAIHQVTK                  | 2353.7             | 2            | 5.1953 | 0.4806 |
| ISVATGALEAAQGSK                          | 1403.6             | 2            | 3.4283 | 0.3883 |
| ISVGSDDLVIWDPDAVKIVSAK                   | 2415.7             | 3            | 3.5705 | 0.1176 |
| ISVISTGPTLQAR                            | 1343.6             | 2            | 3.2869 | 0.174  |
| ISVIVETVYTHVLHPYPTQITQSEK                | 2884.3             | 3            | 5.8287 | 0.3966 |

| Peptide Sequence               | Peptide mass (m/z) | Charge State | Xcorr  | DelCn2 |
|--------------------------------|--------------------|--------------|--------|--------|
| ISVMGGEQAANVLATITK             | 1804.1             | 2            | 2.8023 | 0.1539 |
| ISVMGGEQAANVLATITKDQR          | 2203.5             | 3            | 4.0788 | 0.4028 |
| ISVNNVLPVFDNLMQQK              | 1960.3             | 2            | 4.8224 | 0.4211 |
| ISVREPMQTGIK                   | 1359.6             | 2            | 3.4409 | 0.2661 |
| ISVTVSETFDPEEK                 | 1581.7             | 2            | 2.9243 | 0.2612 |
| ISVYSIMGGSTDGLR                | 1556.8             | 2            | 3.9789 | 0.3723 |
| ISVYYNEASSHK                   | 1398.5             | 2            | 3.046  | 0.3537 |
| ISVYYNEASSHKYVPR               | 1914.1             | 2            | 4.5961 | 0.4739 |
| ISVYYNEATGGK                   | 1302.4             | 2            | 4.002  | 0.3964 |
| ISVYYNEATGGKYVPR               | 1818.0             | 2            | 5.0332 | 0.5049 |
| ISYFTFIGTPVQATNMNDFKR          | 2451.8             | 2            | 3.5531 | 0.297  |
| ISYGPDWKDFYVVEPLAFEGTPEQK      | 2917.2             | 2            | 5.0235 | 0.4364 |
| ITAAQHSVTGSAVSK                | 1457.6             | 2            | 4.6268 | 0.4705 |
| ITADLLSNGIDVYPQKEFDESEDRLVNEK  | 3454.7             | 3            | 5.1034 | 0.3429 |
| ITAFVVER                       | 935.1              | 2            | 2.671  | 0.2642 |
| ITAHLVHELRL                    | 1189.4             | 2            | 3.82   | 0.3212 |
| ITALEQKEQELQALIQQLSIDLQK       | 2782.2             | 3            | 3.5812 | 0.1945 |
| ITDLANLSAANHDAIIFPGGFGAAG      | 2443.7             | 3            | 4.7591 | 0.2048 |
| ITDLKQKVENLNFNEK               | 1820.1             | 2            | 4.0643 | 0.337  |
| ITDLYTDLR                      | 1110.2             | 2            | 2.487  | 0.1393 |
| ITDPQYFLDTPQQAAAILQK           | 2262.5             | 2            | 5.3794 | 0.4208 |
| ITDSAGHILYSKEDATK              | 1850.0             | 2            | 5.3522 | 0.4966 |
| ITDSAGHILYSKEDATKGGK           | 2035.2             | 2            | 5.4125 | 0.4765 |
| ITDSEASKPK                     | 1076.2             | 2            | 3.0151 | 0.2157 |
| ITDSPEEIVQK                    | 1259.4             | 2            | 3.0321 | 0.1041 |
| ITDTIGPTETSIAPR                | 1572.7             | 2            | 3.9917 | 0.2809 |
| ITEADEKNDR                     | 1191.2             | 2            | 3.086  | 0.1828 |
| ITEAPASEKEIVEVKEENIEDATEK      | 2803.0             | 3            | 3.9848 | 0.3138 |
| ITEAPASEKEIVEVKEENIEDATEKGGEEK | 3302.6             | 3            | 4.797  | 0.2169 |
| ITEAVATATEQR                   | 1290.4             | 2            | 2.8925 | 0.1535 |
| ITEDYYVHLIADNLPVATR            | 2204.5             | 3            | 4.9776 | 0.1873 |
| ITEGDVVVGIASSGLHSNGFSLVR       | 2415.7             | 3            | 4.0333 | 0.3941 |
| ITEGVPQLLIVLTADR               | 1739.0             | 2            | 3.6723 | 0.2964 |
| ITEIYEGTSEIQR                  | 1539.7             | 2            | 4.2081 | 0.3582 |
| ITELKEEIEVK                    | 1331.5             | 2            | 3.4275 | 0.1423 |
| ITELQLKLESALTELEQLRK           | 2356.7             | 3            | 5.2481 | 0.352  |

| Peptide Sequence                  | Peptide mass (m/z) | Charge State | Xcorr  | DelCn2 |
|-----------------------------------|--------------------|--------------|--------|--------|
| ITELTDENVKFIIENTDLAVANSIR         | 2820.1             | 3            | 4.8029 | 0.2307 |
| ITELTEAGETKKVNFK                  | 1809.1             | 2            | 2.6321 | 0.1581 |
| ITSEEEVVSIR                       | 1149.2             | 2            | 3.9568 | 0.3562 |
| ITSEEEVVSREVSGIKAAYEAEELGDAR      | 2910.1             | 3            | 4.0154 | 0.1466 |
| ITSEEEVVSREVSGIKAAYEAEELGDARK     | 3038.3             | 3            | 4.4809 | 0.2726 |
| ITESVAETAQTIKK                    | 1519.7             | 2            | 3.4279 | 0.4005 |
| ITFHGEGDQEPGLEPGDIIIVLDQK         | 2722.0             | 3            | 4.3849 | 0.1814 |
| ITFHGEGDQEPGLEPGDIIIVLDQKDHAVFTR  | 3548.9             | 3            | 5.284  | 0.4103 |
| ITFPKEGDQTSNNIPADIVFVLK           | 2547.9             | 3            | 3.7073 | 0.1207 |
| ITFTGEADQAPGVEPGDIVLLLLQEK        | 2642.0             | 3            | 5.0699 | 0.4129 |
| ITFTGEADQAPGVEPGDIVLLLLQEKEHEVFQR | 3567.9             | 3            | 4.8728 | 0.3991 |
| ITGDPYKVQQAQK                     | 1348.5             | 2            | 3.2757 | 0.2747 |
| ITGEAFVQFASQELAEK                 | 1869.1             | 2            | 4.8321 | 0.3214 |
| ITGSIADGTDGFVINLGQGTDKLNLHFNPR    | 3172.5             | 3            | 5.7521 | 0.4573 |
| ITHEVDELTKIIADVSQDPTLPR           | 2591.9             | 3            | 3.4411 | 0.1845 |
| ITHHADNTLKSFCWKQK                 | 2058.4             | 2            | 2.5585 | 0.1169 |
| ITHLSTLQVGSNLVK                   | 1610.9             | 2            | 3.9169 | 0.3931 |
| ITHNPFPGPGQFFDLSIR                | 1947.2             | 3            | 5.0937 | 0.3995 |
| ITHSPLTICFPEYTGANKYDEAASYIQSK     | 3249.6             | 3            | 4.2805 | 0.3427 |
| ITHYFIDLNKK                       | 1392.6             | 2            | 2.5966 | 0.1414 |
| ITIADCGQLE                        | 1063.2             | 2            | 2.6424 | 0.269  |
| ITIAIDTSKR                        | 1118.3             | 2            | 2.7954 | 0.1698 |
| ITIKNDPSLPEPK                     | 1452.7             | 2            | 2.8717 | 0.2281 |
| ITITNDKGR                         | 1018.1             | 1            | 2.805  | 0.1738 |
| ITKEAGSVSLR                       | 1161.3             | 2            | 2.433  | 0.2999 |
| ITKFENAFLSHVVSQHQALLGTIR          | 2711.1             | 3            | 6.5876 | 0.5189 |
| ITKKPIPDEHLILK                    | 1646.0             | 3            | 4.806  | 0.3377 |
| ITKLDQILLNGNNITMLVPGGEGPEV        | 2737.2             | 3            | 4.3176 | 0.3094 |
| ITKPGSIDSNNQLFAPGGR               | 1973.2             | 3            | 3.5619 | 0.1166 |
| ITLDNAYMEK                        | 1198.4             | 2            | 3.2387 | 0.2098 |
| ITLDNAYMEKCDENILWLDYKNICKVVEVGSK  | 3749.3             | 3            | 3.6308 | 0.1303 |
| ITLEDVISHSK                       | 1242.4             | 2            | 3.5223 | 0.2699 |
| ITLKETFLTSPEELR                   | 1941.2             | 3            | 3.2698 | 0.1284 |
| ITLPVDFVTADKFDENAK                | 2024.3             | 2            | 5.4168 | 0.501  |
| ITLQDVVSHSK                       | 1227.4             | 2            | 3.4074 | 0.3155 |
| ITLTEIEPSVETTTQEK                 | 1920.1             | 2            | 3.6251 | 0.1017 |

| Peptide Sequence                      | Peptide mass (m/z) | Charge State | Xcorr  | DelCn2 |
|---------------------------------------|--------------------|--------------|--------|--------|
| ITLHTLYDVK                            | 1304.5             | 2            | 2.8103 | 0.31   |
| ITLTSDPRLPYK                          | 1404.6             | 2            | 2.945  | 0.2231 |
| ITLTSDPRLPYKVLSPPESTPFTAVLK           | 2974.5             | 3            | 3.9184 | 0.27   |
| ITLVSAAPGK                            | 957.1              | 2            | 2.4245 | 0.1246 |
| ITMLGIQGDVK                           | 1189.5             | 2            | 3.2297 | 0.1465 |
| ITMQNLNDR                             | 1105.3             | 2            | 3.0468 | 0.2033 |
| ITMQNLNDRLASYLKDKVR                   | 2151.5             | 3            | 3.2927 | 0.2083 |
| ITNAGMVSDEEELQMLDSGQSEVVFVSNILKDTQVTR | 3986.4             | 3            | 5.1673 | 0.3392 |
| ITNLTQQLEQASIVK                       | 1686.9             | 2            | 5.1422 | 0.3804 |
| ITNQVHGLK                             | 1010.2             | 2            | 2.6707 | 0.3038 |
| ITPAHDQNDYEVGQR                       | 1743.8             | 2            | 4.3195 | 0.5097 |
| ITPENLPQILLQLK                        | 1621.0             | 2            | 4.1497 | 0.2971 |
| ITPLEIEVLEETVQTMDS                    | 2149.4             | 2            | 4.5499 | 0.3577 |
| ITPNLAEFVAFSLYR                       | 1642.9             | 2            | 4.3878 | 0.4869 |
| ITPSYVAFTPEGER                        | 1567.7             | 2            | 4.0344 | 0.5214 |
| ITPSYVAFTPEGERLIGDAK                  | 2236.5             | 2            | 4.6754 | 0.4106 |
| ITPSYVAFTPEGERLIGDAAKNQLTSNPENTVFDK   | 3896.3             | 3            | 4.4723 | 0.359  |
| ITPSYVAFTPEGERLIGDAAKNQLTSNPENTVFDK   | 4052.5             | 3            | 4.3659 | 0.3244 |
| ITQDIFQQLK                            | 1347.6             | 2            | 4.0466 | 0.2533 |
| ITQDIFQQLKR                           | 1503.8             | 2            | 3.7681 | 0.3544 |
| ITQLVSDQANHVLR                        | 1665.9             | 2            | 4.1979 | 0.2524 |
| ITQSNAILR                             | 1016.2             | 2            | 2.9578 | 0.2072 |
| ITQVLHFTKDVK                          | 1429.7             | 2            | 3.045  | 0.2802 |
| ITRPLLLLNDKPAGK                       | 1650.0             | 2            | 2.4987 | 0.1084 |
| ITSAPDMEDILTESEIKLDGVR                | 2433.7             | 2            | 3.0964 | 0.2303 |
| ITSAYLQDIENAYK                        | 1629.8             | 2            | 2.863  | 0.1299 |
| ITSAYLQDIENAYKK                       | 1758.0             | 2            | 4.0035 | 0.305  |
| ITSEAEDLVANFFPK                       | 1681.9             | 2            | 3.9323 | 0.357  |
| ITSEIPQTER                            | 1174.3             | 2            | 2.8778 | 0.1811 |
| ITSFPESEGYSYETSTK                     | 1927.0             | 2            | 4.2234 | 0.4932 |
| ITSGPFEPDLYKSEMEVQDAELK               | 2627.9             | 3            | 3.2568 | 0.1503 |
| ITSGPFEPDLYKSEMEVQDAELKALLQSSASR      | 3541.9             | 3            | 5.6937 | 0.5482 |
| ITSIVKDSSAAR                          | 1248.4             | 2            | 2.8931 | 0.2181 |
| ITSPLMEPSSIEK                         | 1432.7             | 2            | 3.0866 | 0.246  |
| ITSQYLGHPR                            | 1172.3             | 2            | 3.359  | 0.2307 |
| ITTGAQDDLK                            | 1218.3             | 2            | 3.1934 | 0.2793 |

| Peptide Sequence                          | Peptide mass (m/z) | Charge State | Xcorr  | DelCn2 |
|-------------------------------------------|--------------------|--------------|--------|--------|
| ITGSSSAGTQSSTSNR                          | 1642.7             | 2            | 4.352  | 0.4842 |
| ITTHFELK                                  | 989.1              | 2            | 2.659  | 0.2016 |
| ITTHYTIYPR                                | 1265.4             | 2            | 3.363  | 0.3367 |
| ITTLEAGCFDNLSSSLLVVK                      | 2111.4             | 3            | 3.4744 | 0.193  |
| ITTTVACNMDLSKYPMDTQTCKLQLES               | 3036.5             | 3            | 4.706  | 0.1281 |
| ITVEDSDKQLLKSPQLPSPQAEK                   | 2553.8             | 3            | 3.925  | 0.2418 |
| ITVEEALAHPLYEQYYDPTDEPVAEEPFTFAMELDDLPKER | 4814.2             | 3            | 3.8391 | 0.315  |
| ITVLEALRHPIQVSR                           | 1733.1             | 3            | 3.6363 | 0.2258 |
| ITVNEVELLMK                               | 1388.7             | 2            | 3.5057 | 0.3557 |
| ITVTSEVPFSK                               | 1208.4             | 2            | 2.6449 | 0.2187 |
| ITVTSEVPFSKR                              | 1364.6             | 2            | 3.2154 | 0.2446 |
| ITWSNPPAQGAR                              | 1298.4             | 2            | 3.0135 | 0.1284 |
| IVAAHNK                                   | 752.9              | 1            | 1.6287 | 0.1747 |
| IVADKDYSVTANSK                            | 1511.7             | 2            | 4.7273 | 0.4127 |
| IVAEIQDKMK                                | 1175.4             | 2            | 3.2717 | 0.2217 |
| IWAERPSTNSTGPPMAPPR                       | 2020.3             | 3            | 4.0691 | 0.309  |
| IWAERPSTNSTGPPMAPPRAPGPLSK                | 2671.1             | 3            | 5.6171 | 0.3976 |
| IWAFADAAVEPIDFPIAPVYAASMLK                | 2820.3             | 3            | 6.102  | 0.434  |
| IWAFADAAVEPIDFPIAPVYAASMLKDVGLK           | 3332.9             | 3            | 3.6016 | 0.1966 |
| IWAFENAFER                                | 1196.3             | 2            | 3.331  | 0.3303 |
| IWALNAHTFLR                               | 1255.5             | 2            | 3.3525 | 0.3178 |
| IWAPGKGILAADESTGSIK                       | 1899.2             | 3            | 5.2877 | 0.532  |
| IWAPGKGILAADESTGSIKR                      | 2055.4             | 2            | 5.3717 | 0.4929 |
| IWAPGKGILAADESVMGMAK                      | 1915.2             | 3            | 5.2084 | 0.4092 |
| IWAPISDSPKPPPQR                           | 1602.9             | 2            | 3.8415 | 0.4608 |
| IWASTLSNPQLFEEWTGNVK                      | 2235.5             | 2            | 5.4883 | 0.5294 |
| IWATKPLYVALAQR                            | 1543.9             | 2            | 4.2879 | 0.3699 |
| IWAVIGAVVDVQFDEGLPPILNALEVQGR             | 3033.5             | 3            | 3.5064 | 0.1826 |
| IWAVTGAEAQK                               | 1087.3             | 2            | 3.366  | 0.3154 |
| IWDDWANDGWGLK                             | 1489.6             | 2            | 4.0178 | 0.3848 |
| IWDDWANDGWGLKK                            | 1617.8             | 2            | 3.983  | 0.3213 |
| IWDGKVVSETNDTK                            | 1505.7             | 2            | 4.3058 | 0.4048 |
| IWDGKVVSETNDTKVL                          | 1717.9             | 2            | 4.3254 | 0.4393 |
| IWDGKVVSETNDTKVLRH                        | 2011.3             | 3            | 5.3823 | 0.471  |
| IWDLIKGQHLSDAFAQVNPLKK                    | 2435.9             | 3            | 5.7445 | 0.5342 |
| IWDLVKELDRDTVFALVNIYFFK                   | 2759.2             | 3            | 4.9809 | 0.3425 |



| Peptide Sequence                   | Peptide mass (m/z) | Charge State | Xcorr  | DelCn2 |
|------------------------------------|--------------------|--------------|--------|--------|
| IVDQNTKLAPETK                      | 1457.7             | 2            | 3.7376 | 0.2104 |
| IVDRIDNDGDGFVTTEELK                | 2137.3             | 2            | 4.9287 | 0.4033 |
| IVDVIGEK                           | 873.0              | 2            | 2.7228 | 0.1612 |
| IVDVIGEKIYKDGER                    | 1735.0             | 3            | 3.5637 | 0.3501 |
| IVEFHNNHIGQTPAESDFQLLEIAR          | 2903.2             | 3            | 4.1957 | 0.3147 |
| IVEFLQSFDEITAMTGDGVNDAPALK         | 2783.1             | 3            | 3.7231 | 0.2486 |
| IVEHQNLISK                         | 1068.2             | 2            | 2.6521 | 0.1974 |
| IVEIGDENATLDGTDVLTGREFFVGLSK       | 3144.5             | 3            | 4.0598 | 0.2546 |
| IVEIPFNSTNK                        | 1262.4             | 2            | 2.5902 | 0.1004 |
| IVEIPFNSTNKYQLSIHKNPNTSEPHLLVMK    | 3722.3             | 3            | 4.8302 | 0.3537 |
| IVEKLEKSTKPIVAAINGSCLEGGLEVAISCQYR | 3549.2             | 3            | 4.3873 | 0.1688 |
| IVEKYGYTHLSAGELLR                  | 1950.2             | 3            | 4.8928 | 0.5117 |
| IVEKYGYTHLSAGELLRDER               | 2350.6             | 2            | 4.2226 | 0.3235 |
| IVEMSTSK                           | 895.1              | 1            | 1.7941 | 0.2585 |
| IVENEKINAEK                        | 1287.4             | 2            | 3.421  | 0.2956 |
| IVENEKINAEKSSK                     | 1589.8             | 2            | 3.598  | 0.3064 |
| IVENIQVFDFK                        | 1352.6             | 2            | 3.8458 | 0.3154 |
| IVENLGILTGPQLFSLNKEELKK            | 2585.0             | 3            | 3.4801 | 0.151  |
| IVENLQSFNEITAMTGDGVNDAPALKK        | 2877.2             | 3            | 4.5109 | 0.2403 |
| IVENSDAVTEILNNAELLK                | 2086.3             | 2            | 5.6351 | 0.4057 |
| IVEPYIAWGYPNLK                     | 1663.9             | 2            | 3.9973 | 0.2795 |
| IVERDGLSEAAAQSR                    | 1602.7             | 2            | 4.0112 | 0.38   |
| IVEVLLMK                           | 945.2              | 2            | 2.8705 | 0.19   |
| IVEVLLMKDR                         | 1216.5             | 2            | 3.5035 | 0.2542 |
| IVEVLLMKDRETNK                     | 1689.0             | 2            | 3.5753 | 0.3157 |
| IVEYEKEMEK                         | 1298.5             | 2            | 3.5398 | 0.2624 |
| IVFEDGNINVNK                       | 1362.5             | 2            | 3.1826 | 0.1073 |
| IVFSGNLFQHQEDSKK                   | 1878.1             | 2            | 4.7594 | 0.3809 |
| IVFSPEEAKAVSSQMIGK                 | 1922.2             | 3            | 3.3119 | 0.3997 |
| IVFTKQPEPVIPVKDATSDLAIAR           | 2723.2             | 3            | 5.7312 | 0.3686 |
| IVGDYQQLEER                        | 1350.5             | 2            | 2.9381 | 0.2165 |
| IVGELEQMVEDVPLDHR                  | 2067.3             | 2            | 5.2512 | 0.4177 |
| IVGGNAAQLAQFDPR                    | 1557.7             | 2            | 4.6549 | 0.3668 |
| IVGHLTHALK                         | 1089.3             | 2            | 3.3089 | 0.3768 |
| IVGPEENLSQAEAR                     | 1513.6             | 2            | 4.1749 | 0.4124 |
| IVGSKPLYVALAQR                     | 1515.8             | 2            | 3.7229 | 0.339  |

| Peptide Sequence                   | Peptide mass (m/z) | Charge State | Xcorr  | DelCn2 |
|------------------------------------|--------------------|--------------|--------|--------|
| IVHAFDMEDLGDK                      | 1490.7             | 2            | 4.1083 | 0.4352 |
| IVHSLDYNTCEYPNEDEMPNRCGIIHVR       | 3482.9             | 3            | 4.0182 | 0.1361 |
| IVIGMDVAASEFYR                     | 1571.8             | 2            | 2.9251 | 0.2764 |
| IVIGYQSHADTATK                     | 1504.7             | 2            | 4.228  | 0.4972 |
| IVITGDGDIDHDQALAQAIR               | 2122.3             | 3            | 3.9675 | 0.2797 |
| IVIVPSLNPDGR                       | 1280.5             | 2            | 2.6393 | 0.1024 |
| IVKADEHVIDQGDDGDNFYVIER            | 2648.8             | 3            | 6.5356 | 0.4907 |
| IVKDLMSK                           | 934.2              | 2            | 2.4851 | 0.1303 |
| IVKDLMSKAEK                        | 1262.5             | 2            | 2.9309 | 0.2441 |
| IVKDSLSDDVVK                       | 1318.5             | 2            | 3.0991 | 0.1474 |
| IVKEAHEPLAVADAK                    | 1591.8             | 2            | 2.5414 | 0.3198 |
| IVKEHNLQVLGLVK                     | 1590.9             | 2            | 3.2068 | 0.2955 |
| IVKEPTSHDNKDICK                    | 1728.0             | 2            | 3.1219 | 0.2924 |
| IVKPNGEKPDEFESGISQALLELEMNSDLK     | 3332.7             | 3            | 6.2968 | 0.4962 |
| IVKPNGEKPDEFESGISQALLELEMNSDLKAQLR | 3801.3             | 3            | 6.1568 | 0.5701 |
| IVKPVKVSAPR                        | 1194.5             | 2            | 2.4284 | 0.2191 |
| IVLADADLDNAVEFAHHGVFYHQGCCIAASR    | 3472.9             | 3            | 6.4865 | 0.4099 |
| IVLANDPDADR                        | 1199.3             | 2            | 2.7758 | 0.1665 |
| IVLANDPDADRLAVAEKQDSGEWR           | 2669.9             | 3            | 4.5763 | 0.3924 |
| IVLDNSVFSEHR                       | 1416.6             | 2            | 3.2682 | 0.2887 |
| IVLDSDAAEYGGHQR                    | 1631.7             | 2            | 4.7536 | 0.4042 |
| IVLEDGTLHVTEGSGR                   | 1683.8             | 2            | 4.1487 | 0.4472 |
| IVLFDTLLEEYSVLNKDIQEDSGMEPR        | 3155.5             | 3            | 4.5444 | 0.3322 |
| IVLGQEQDSYGGKFDR                   | 1813.0             | 2            | 3.8755 | 0.3257 |
| IVLQNGAHEVFNHR                     | 1634.8             | 2            | 4.2868 | 0.5176 |
| IVNDDQSFYADIYMEDGLIK               | 2350.6             | 2            | 5.6101 | 0.4684 |
| IVNDDQSFYADIYMEDGLIKQIGDNLIVPGGVK  | 3642.1             | 3            | 5.2334 | 0.4383 |
| IVNDDQSFYADIYMEDGLIKQIGENLIVPGGVK  | 3656.1             | 3            | 5.9732 | 0.4654 |
| IVNGEDAVPGSWPWQVSLQDK              | 2326.5             | 2            | 4.6067 | 0.4295 |
| IVNHPTMLQDPDVREFLEKEELPR           | 2907.3             | 3            | 3.4293 | 0.3241 |
| IVNHWASPELR                        | 1322.5             | 2            | 2.7088 | 0.2514 |
| IVNLGSSKTDLFYER                    | 1743.0             | 3            | 3.3729 | 0.1098 |
| IVNSAQTGSFK                        | 1152.3             | 2            | 3.7356 | 0.3426 |
| IVNTPFQVLMNSEK                     | 1620.9             | 2            | 3.9935 | 0.3896 |
| IVNTQEQLNHR                        | 1352.5             | 2            | 3.4432 | 0.1757 |
| IVNVSSLAHHLGR                      | 1403.6             | 2            | 4.7166 | 0.447  |

| Peptide Sequence                      | Peptide mass (m/z) | Charge State | Xcorr  | DelCn2 |
|---------------------------------------|--------------------|--------------|--------|--------|
| IVPAKDLVLLSEIEVAQANDIISSTEISSAEK      | 3384.8             | 3            | 6.1867 | 0.3911 |
| IVPEWQDYDQEIK                         | 1663.8             | 2            | 2.7248 | 0.3716 |
| IVPNVLEQ GK                           | 1210.4             | 2            | 2.5533 | 0.1675 |
| IVPVEITISLLKR                         | 1481.8             | 2            | 2.7022 | 0.3229 |
| IVQAEGEAEAAK                          | 1216.3             | 2            | 4.2057 | 0.3989 |
| IVQAEGEAEAAKMLGEALSKNPGYIK            | 2719.1             | 3            | 4.7651 | 0.3192 |
| IVQAEGEAEAAKMLGEALSKNPGYIKLR          | 2988.5             | 3            | 4.0253 | 0.3056 |
| IVQELPQLLDAR                          | 1395.6             | 2            | 2.9002 | 0.152  |
| IVQISGNSMPR                           | 1202.4             | 2            | 3.4726 | 0.1685 |
| IVQKHPHTGDTK                          | 1361.5             | 2            | 3.0871 | 0.2247 |
| IVQKHPHTGDTKEEK                       | 1747.9             | 2            | 3.6347 | 0.3158 |
| IVQMTEAEVR                            | 1176.4             | 2            | 3.6238 | 0.3303 |
| IVQNSNGYK                             | 1023.1             | 2            | 2.9726 | 0.108  |
| IVQNSNGYKIVTEK                        | 1593.8             | 2            | 3.7696 | 0.2085 |
| IVQTYHVN MAGTNPYTTITPQEINGK           | 2892.2             | 3            | 4.568  | 0.2452 |
| IVQVVTAEAVAVLKGEQEK                   | 2012.3             | 2            | 4.0791 | 0.4288 |
| IVRSEQEFQEQLESARR                     | 2106.3             | 3            | 4.1116 | 0.1128 |
| IVSAQSLAEDDVE                         | 1376.4             | 2            | 3.894  | 0.3709 |
| IVSDYGKDPSITSILDALDIFLLPVTNPDGYVFSQTK | 4044.6             | 3            | 4.8658 | 0.3924 |
| IVSGEAE SVEVTPENLQDFVGKPVFTVER        | 3177.5             | 3            | 5.296  | 0.3788 |
| IVSGIITPIHEQWEK                       | 1751.0             | 2            | 4.0976 | 0.3306 |
| IVSGKDYNVTANSK                        | 1496.6             | 2            | 4.9966 | 0.4314 |
| IVSKIDGDKDGFVTVDELKDWIK               | 2622.0             | 3            | 4.6299 | 0.3661 |
| IVSLFAEHNDLQYAAPGGLIGVGTK             | 2571.9             | 3            | 5.3156 | 0.3039 |
| IVSNVPQLEFLNLSSNPLNLSVLER             | 2797.2             | 3            | 3.3681 | 0.202  |
| IVSPLLTLMDGLK                         | 1431.8             | 2            | 4.7687 | 0.4096 |
| IVSPLLTLMDGLKQR                       | 1716.1             | 2            | 4.3433 | 0.4516 |
| IVSQPQPAR                             | 996.1              | 2            | 2.869  | 0.2889 |
| IVSRPEELREDDVGTGAGLLEIK               | 2497.8             | 2            | 4.7476 | 0.382  |
| IVSRPEELREDDVGTGAGLLEIKK              | 2626.0             | 3            | 4.5964 | 0.3265 |
| IVTDRETGSSK                           | 1193.3             | 2            | 4.04   | 0.3325 |
| IVTDRETGSSKGFVDFNSEEDAK               | 2736.9             | 3            | 5.275  | 0.4802 |
| IVTSDSKTEELR                          | 1493.6             | 2            | 3.6081 | 0.3367 |
| IVTSLGLK                              | 831.0              | 2            | 2.5929 | 0.1142 |
| IVTSTYKDGK                            | 1112.3             | 2            | 3.0643 | 0.2161 |
| IVVAGNNEDVSFSRPADLDLIQSTPFKPLALK      | 3456.9             | 3            | 4.323  | 0.3457 |

| Peptide Sequence                      | Peptide mass (m/z) | Charge State | Xcorr  | DelCn2 |
|---------------------------------------|--------------------|--------------|--------|--------|
| IVVAMAK                               | 732.0              | 1            | 2.0315 | 0.148  |
| IVVNLTGR                              | 872.0              | 2            | 2.658  | 0.1474 |
| IVVVTAGVR                             | 914.1              | 2            | 2.4986 | 0.1168 |
| IVYGHLLDDPASQEIER                     | 1843.0             | 3            | 4.9642 | 0.4062 |
| IVYGHLLDDPASQEIERGK                   | 2028.2             | 3            | 4.3679 | 0.4004 |
| IVYVNEKEGGPNNHLLK                     | 1925.2             | 2            | 5.125  | 0.3724 |
| IVYYLMNIHVQPR                         | 1647.0             | 2            | 3.3741 | 0.3129 |
| IWDKLHEEHINAGR                        | 1718.9             | 2            | 2.6898 | 0.2271 |
| IWDPTPSHTPAGAATPGRGDTPGHATPGHGGATSSAR | 3548.7             | 3            | 4.3299 | 0.362  |
| IWDTTQKEHLLK                          | 1512.7             | 2            | 2.8488 | 0.2705 |
| IWDTTQKEHLLKYEYQPFAGK                 | 2596.9             | 3            | 5.9216 | 0.3768 |
| IWHHSFYNELR                           | 1502.7             | 2            | 2.7606 | 0.174  |
| IWHHTFYNELR                           | 1516.7             | 2            | 3.9646 | 0.4387 |
| IWNVHSLNVLHSLVDKSNINR                 | 2558.9             | 3            | 3.3138 | 0.226  |
| IWQYVYSKDQLQTFSEEHPVLLTEAPLNPR        | 3604.0             | 3            | 4.9261 | 0.4622 |
| IWQYVYSKDQLQTFSEEHPVLLTEAPLNPSK       | 3663.1             | 3            | 5.4899 | 0.4365 |
| IYADSLKPNIPYK                         | 1522.8             | 2            | 2.6977 | 0.141  |
| IYAEDPSNFMFVAGPLVHLSTPR               | 2627.0             | 3            | 6.0676 | 0.4926 |
| IYALPDDLVEVKPK                        | 1600.9             | 2            | 3.403  | 0.3251 |
| IYCKPHFNQLFK                          | 1538.8             | 2            | 3.4209 | 0.1245 |
| IYDALDVSLIER                          | 1407.6             | 2            | 3.6207 | 0.3648 |
| IYDAQNELSAATHLTSK                     | 1863.0             | 2            | 4.6363 | 0.4666 |
| IYDLNKPEAEPK                          | 1417.6             | 2            | 3.8409 | 0.2707 |
| IYDLNKPEAEPKEISGHTSGIK                | 2427.7             | 3            | 4.091  | 0.3496 |
| IYDLNKPEAEPKEISGHTSGIKK               | 2555.9             | 3            | 4.1641 | 0.2852 |
| IYDVEQTR                              | 1024.1             | 2            | 2.9279 | 0.15   |
| IYEDGDDDMKR                           | 1357.4             | 2            | 3.1201 | 0.28   |
| IYEENDRAVFDK                          | 1499.6             | 2            | 2.7229 | 0.1643 |
| IYEENDRAVFDKIVSK                      | 1927.1             | 3            | 3.9693 | 0.2556 |
| IYEKDEEKQR                            | 1338.4             | 2            | 3.5387 | 0.2189 |
| IYELAAGGTAVGTGLNTR                    | 1765.0             | 2            | 5.4516 | 0.4186 |
| IYESHVGISSHEGK                        | 1543.7             | 2            | 4.0357 | 0.4452 |
| IYFGKDIPNMFMDMSAGSVSK                 | 2208.5             | 3            | 4.788  | 0.3391 |
| IYFMAGSSR                             | 1032.2             | 2            | 3.2456 | 0.3046 |
| IYGADDIELLPEAQHK                      | 1813.0             | 2            | 4.3356 | 0.4177 |
| IYGADDIELLPEAQHKADEVYTK               | 2504.8             | 3            | 3.4022 | 0.1583 |

| Peptide Sequence                     | Peptide mass (m/z) | Charge State | Xcorr  | DelCn2 |
|--------------------------------------|--------------------|--------------|--------|--------|
| IYGISFPDPK                           | 1137.3             | 2            | 3.378  | 0.3198 |
| IYGLGSLALYEK                         | 1327.6             | 2            | 4.3883 | 0.3894 |
| IYHEQEALQELGNKLSSEK                  | 2345.6             | 3            | 4.0244 | 0.2218 |
| IYHPNINSNGSICLDILR                   | 2043.3             | 2            | 3.501  | 0.255  |
| IYHPNVDKLGR                          | 1312.5             | 2            | 2.4702 | 0.1786 |
| IYIDSNNNPER                          | 1335.4             | 2            | 3.628  | 0.3084 |
| IYITDGNMQLTVLTDR                     | 1854.1             | 2            | 2.7403 | 0.1595 |
| IYITLTGVHQVPTENVQVHFTR               | 2683.0             | 3            | 5.8803 | 0.4765 |
| IYKDGER                              | 881.0              | 2            | 2.4011 | 0.1209 |
| IYKTTTHVPPPELGQIMDSETFEK             | 2666.0             | 3            | 3.9075 | 0.2326 |
| IYKVPSTEAALASSLMGLFEK                | 2385.8             | 2            | 4.9334 | 0.4876 |
| IYLDGAPNKDLTQD                       | 1563.7             | 2            | 2.9534 | 0.2371 |
| IYLTADNLVLNLQDESFTR                  | 2226.5             | 2            | 6.1132 | 0.4555 |
| IYLTADNLVLNLQDESFTRGSDSLIK           | 2927.3             | 3            | 3.7167 | 0.2214 |
| IYLYTLNDNAR                          | 1356.5             | 2            | 2.8899 | 0.1764 |
| IYNDDKNTYIR                          | 1415.5             | 2            | 3.0665 | 0.2205 |
| IYNEIPDINLDVPHSYSVLER                | 2487.7             | 3            | 3.7152 | 0.2341 |
| IYNHPPHPTMSVDEVLEMLQR                | 2507.9             | 3            | 4.1893 | 0.1659 |
| IYNLGTGTGYSVLQMVQAMEK                | 2304.7             | 2            | 4.6234 | 0.2783 |
| IYPEEMIQTGISAIDGMNSIAR               | 2410.8             | 3            | 5.9515 | 0.4659 |
| IYPHGLVLLDLQSYDGDAAQGGKEEIDSILNKVEER | 3859.2             | 3            | 6.3001 | 0.457  |
| IYPLPDDPSVPAPPR                      | 1634.9             | 2            | 3.3878 | 0.42   |
| IYPLPHMYVIKDLVPDLSNFYAQYK            | 3029.5             | 3            | 3.4193 | 0.1272 |
| IYPSREEYEAHQDR                       | 1793.9             | 2            | 2.7335 | 0.1301 |
| IYPTFLHLHGK                          | 1326.6             | 2            | 2.9678 | 0.3745 |
| IYQIYEGTSQIQR                        | 1599.8             | 2            | 4.8176 | 0.4508 |
| IYQNIQDGSLLDLNAAESGVQHKPSAPQGGR      | 3152.4             | 3            | 5.609  | 0.4511 |
| IYSALILHDDEVTVTEDKINALIK             | 2715.1             | 3            | 6.6738 | 0.5245 |
| IYSHDGTDSPPDADEVVIVLNNFKSK           | 2862.1             | 3            | 4.2091 | 0.3068 |
| IYSHSLLPVLR                          | 1298.6             | 3            | 3.4326 | 0.2815 |
| IYSLSSQPIDHEGIK                      | 1687.9             | 2            | 3.8776 | 0.3392 |
| IYVAELIQQLQQQALSEPAVVQK              | 2598.0             | 3            | 4.947  | 0.3604 |
| IYVAELIQQLQQQALSEPAVVQKR             | 2754.2             | 3            | 7.1495 | 0.3573 |
| IYVASVHQDLSDDDIKSVFEAFGK             | 2684.9             | 3            | 6.0216 | 0.3874 |
| IYVDDGLISLQVK                        | 1463.7             | 2            | 4.8321 | 0.3916 |
| IYVGNASVAQDIPK                       | 1475.7             | 2            | 4.8475 | 0.3883 |

| Peptide Sequence                     | Peptide mass (m/z) | Charge State | Xcorr  | DelCn2 |
|--------------------------------------|--------------------|--------------|--------|--------|
| IYVGNASVAQDIPKLQKLGITHVLNAAEGR       | 3177.6             | 3            | 4.7006 | 0.3217 |
| IYVGNLPPDIR                          | 1257.5             | 2            | 3.2677 | 0.3388 |
| IYVGNLPTDVREKDLLEDFYK                | 2528.8             | 3            | 4.072  | 0.2649 |
| IYVISLAEPR                           | 1161.4             | 2            | 3.1489 | 0.2675 |
| IYVVDVGSEPR                          | 1234.4             | 2            | 3.8993 | 0.3576 |
| IYVVDVGSEPRAPK                       | 1530.8             | 2            | 3.3858 | 0.136  |
| KAAAEDVNVTFEDQQK                     | 1793.9             | 2            | 4.3781 | 0.404  |
| KAAALEAMKDYTK                        | 1440.7             | 2            | 3.2844 | 0.1954 |
| KAAALEFLNR                           | 1133.3             | 2            | 3.7386 | 0.2567 |
| KAAALEFLNRFEEAK                      | 1738.0             | 2            | 4.5063 | 0.4265 |
| KAAALEFLNRFEEAKR                     | 1894.2             | 2            | 3.5486 | 0.2506 |
| KAAATPAKK                            | 886.1              | 2            | 2.9367 | 0.1351 |
| KAADDTWEPFASGK                       | 1523.6             | 2            | 4.9211 | 0.494  |
| KAADKLIQNLDANHDGR                    | 1880.1             | 3            | 4.065  | 0.3152 |
| KAAEAHVDAHYYEQNEQPTGTCAACITGDNR      | 3365.6             | 3            | 6.0103 | 0.3294 |
| KAAELEELKALSCLRADNQR                 | 2400.6             | 3            | 3.2801 | 0.2441 |
| KAAGGATPK                            | 800.9              | 2            | 3.1686 | 0.2359 |
| KAAGGATPKK                           | 929.1              | 2            | 3.3626 | 0.1878 |
| KAAGHPGDPESQQR                       | 1478.6             | 2            | 3.3983 | 0.2714 |
| KAAHSAELEAVLLALAR                    | 1764.1             | 2            | 2.8828 | 0.2634 |
| KAAIISAEGDSK                         | 1190.3             | 2            | 3.0695 | 0.3307 |
| KAAIISAEGDSKAAELIANSLATAGDGLIELR     | 3170.6             | 3            | 4.6499 | 0.4176 |
| KAALDEAQQVGLDSTGYDQEIYGGSDSR         | 3067.2             | 3            | 4.9411 | 0.4467 |
| KAALAEQNALHNIK                       | 1521.7             | 2            | 4.4462 | 0.3437 |
| KAALAEQNALHNMK                       | 1539.8             | 2            | 5.0251 | 0.4172 |
| KAALAEEVER                           | 1045.2             | 2            | 3.3316 | 0.1781 |
| KAALAEEVERLK                         | 1286.5             | 2            | 3.8374 | 0.1501 |
| KAALSASEGEEVPQDKAPSHVPFLIGGGTAAFAAAR | 3666.1             | 3            | 5.4583 | 0.4781 |
| KAAPGAAGSR                           | 886.0              | 2            | 2.5492 | 0.1632 |
| KAASEYEKEITSLQNSFQLR                 | 2343.6             | 3            | 4.0052 | 0.2361 |
| KAASGEAKPK                           | 987.1              | 2            | 3.2343 | 0.3395 |
| KAASGEAKPKVK                         | 1214.4             | 2            | 3.528  | 0.2384 |
| KAASQPTSLAPEK                        | 1328.5             | 2            | 3.1577 | 0.2196 |
| KAATALKDVVK                          | 1144.4             | 2            | 3.6625 | 0.3389 |
| KAATVHLMQ                            | 999.2              | 2            | 2.4143 | 0.1966 |
| KAAVEALQSQUALHATSQQPLRK              | 2376.7             | 2            | 4.9722 | 0.412  |

| Peptide Sequence                     | Peptide mass (m/z) | Charge State | Xcorr  | DelCn2 |
|--------------------------------------|--------------------|--------------|--------|--------|
| KA AVTPGKK                           | 900.1              | 2            | 3.3076 | 0.3582 |
| KADAAANQGKK                          | 1102.2             | 2            | 2.5457 | 0.2342 |
| KADEVLEILK                           | 1158.4             | 2            | 3.5673 | 0.2286 |
| KADGVKQTNSTK                         | 1374.5             | 2            | 4.0265 | 0.2639 |
| KADGYNQPDSK                          | 1223.3             | 2            | 3.6135 | 0.3697 |
| KADIDLTKR                            | 1060.2             | 2            | 2.8173 | 0.1025 |
| KADIGVAMGIAGSDVSK                    | 1619.9             | 2            | 5.5135 | 0.4941 |
| KADQKGVTIIGPATVGGIKPGCFK             | 2386.8             | 3            | 3.3965 | 0.1889 |
| KADSVANQGTK                          | 1119.2             | 2            | 3.3755 | 0.3258 |
| KADSVANQGTKVEGITNQGK                 | 2046.2             | 3            | 5.307  | 0.4949 |
| KADYQAVDDEIEANLEEFDISEDIDDDGFRR      | 3634.7             | 3            | 5.1782 | 0.4657 |
| KAEAAASALADADADLEERLK                | 2159.3             | 3            | 3.2732 | 0.2979 |
| KAEAAVVVAEKR                         | 1342.6             | 2            | 3.6568 | 0.2793 |
| KAEADPQAIPK                          | 1168.3             | 2            | 3.6114 | 0.2348 |
| KAEAFQLYQEAQLDMLLEKLPQVAEEISGPLTSANK | 4076.6             | 3            | 5.7589 | 0.4024 |
| KAEAGAGSATEFQFR                      | 1570.7             | 2            | 5.2971 | 0.3759 |
| KAEALAQISAAFEDLEQALQQR               | 2431.7             | 3            | 4.2589 | 0.3687 |
| KAEALAQISAAFEDLEQALQQRK              | 2559.9             | 3            | 4.4744 | 0.4224 |
| KAEAQIAAK                            | 930.1              | 2            | 3.5693 | 0.2023 |
| KAEDLSSLNGQLQSEVTLLRNEVAQLK          | 2985.3             | 3            | 4.7309 | 0.2862 |
| KAEDAALQAK                           | 1174.3             | 2            | 3.5546 | 0.211  |
| KAEDPEAADS GEPQNK R                  | 1972.0             | 3            | 3.6827 | 0.3052 |
| KAEEEEAEAKPK                         | 1230.4             | 2            | 2.5648 | 0.1222 |
| KAEEEEKAPATPKTEEEKKDSKKEEAPK         | 2928.2             | 3            | 3.7142 | 0.1271 |
| KAEEIANEMIEAAK                       | 1547.8             | 2            | 5.3758 | 0.4064 |
| KAEEVQAWAQR                          | 1316.4             | 2            | 2.7461 | 0.2968 |
| KAEGAPNQGR                           | 1028.1             | 2            | 3.3991 | 0.1913 |
| KAEGAPNQGRK                          | 1156.3             | 2            | 3.0573 | 0.132  |
| KAEGAQNQGKKAEGAQNQGQKGEGAQNQGK       | 3041.2             | 3            | 3.9591 | 0.1826 |
| KAEGDAKGDK                           | 1019.1             | 2            | 3.2831 | 0.2196 |
| KAEGDAKGDKAK                         | 1218.3             | 2            | 3.7431 | 0.2636 |
| KAEGEPQEE S P L K                    | 1442.6             | 2            | 3.9822 | 0.3268 |
| KAEGSPSEGK                           | 990.0              | 2            | 2.5009 | 0.2191 |
| KAEGSPSEGKK                          | 1118.2             | 2            | 3.9219 | 0.363  |
| KAEGTPNQGK                           | 1030.1             | 2            | 2.6954 | 0.3123 |
| KAEGTPNQGKK                          | 1158.3             | 2            | 3.2689 | 0.2595 |

| Peptide Sequence               | Peptide mass (m/z) | Charge State | Xcorr  | DelCn2 |
|--------------------------------|--------------------|--------------|--------|--------|
| KAEIGIAMGSGTAVAK               | 1504.8             | 2            | 4.7675 | 0.4356 |
| KAEKEFELR                      | 1150.3             | 2            | 2.6712 | 0.1865 |
| KAEKELESHSSWYAPEALQK           | 2332.6             | 3            | 3.6773 | 0.2325 |
| KAELEENQR                      | 1117.2             | 2            | 2.5378 | 0.1935 |
| KAELLDNEKPAAVVAPITTYTVK        | 2529.9             | 3            | 5.0221 | 0.44   |
| KAPEMQWASLELPAAK               | 1771.1             | 2            | 3.3715 | 0.2395 |
| KAERDELAVMIFSTMEPEAPDLDLVEIEQK | 3506.0             | 3            | 4.3718 | 0.293  |
| KAESGDKEKDTLK                  | 1449.6             | 2            | 4.148  | 0.2883 |
| KAESVQGETR                     | 1162.2             | 2            | 2.9291 | 0.2886 |
| KAEVEGKDLPEHAVLK               | 1764.0             | 3            | 5.7273 | 0.4502 |
| KAEVNTIPGFDGVVKDAEEAVR         | 2345.6             | 3            | 5.7706 | 0.4896 |
| KAFEEAEKNAPAIIFIDELDAIAPK      | 2745.1             | 3            | 6.7472 | 0.4586 |
| KAFEEAEKNAPAIIFIDELDAIAPKR     | 2901.3             | 3            | 7.4148 | 0.4932 |
| KAFLDNGPK                      | 990.1              | 2            | 2.497  | 0.1427 |
| KAFPEHLYQR                     | 1289.5             | 3            | 3.5353 | 0.239  |
| KAFSGYLGTDQSK                  | 1402.5             | 2            | 4.4609 | 0.3983 |
| KAFTEVTQTELQDPHPSR             | 2085.3             | 3            | 3.3186 | 0.3093 |
| KAFVFPK                        | 837.0              | 2            | 2.5812 | 0.1993 |
| KAGEQQETASR                    | 1205.3             | 2            | 3.1785 | 0.3011 |
| KAGGTGPGEEK                    | 1031.1             | 2            | 2.4954 | 0.1271 |
| KAGIAHLYGIAGSTNVTGDQVK         | 2201.5             | 2            | 5.4568 | 0.5121 |
| KAGIFQSVK                      | 978.2              | 2            | 2.7974 | 0.2176 |
| KAGKLDPHLVLDQLR                | 1704.0             | 2            | 3.3731 | 0.2789 |
| KAGLSLKDMDLVEVNEAFAPQYLAVR     | 3008.4             | 3            | 4.8791 | 0.3996 |
| KAGNFYVPAEPK                   | 1321.5             | 2            | 3.2677 | 0.2288 |
| KAGPAKEQEPMPPTVDSHEPR          | 2205.4             | 3            | 4.2881 | 0.1239 |
| KAGPPPEKR                      | 980.1              | 2            | 2.6004 | 0.1727 |
| KAGQVFLEELGNHK                 | 1570.8             | 2            | 4.6829 | 0.3865 |
| KAGTQIENIDEDFRDGLK             | 2050.2             | 3            | 5.4191 | 0.4902 |
| KAGTQIENIEEDFRDGLK             | 2064.2             | 2            | 4.4077 | 0.4402 |
| KAGVDPLVPLR                    | 1165.4             | 2            | 3.3929 | 0.2235 |
| KAHEAALEAR                     | 1096.2             | 2            | 3.2543 | 0.2591 |
| KAHEILPNLVCCSAK                | 1627.0             | 2            | 2.9917 | 0.1329 |
| KAHGLLAEENR                    | 1238.4             | 2            | 2.6092 | 0.2722 |
| KAHLMEIQVNGGTVAEK              | 1826.1             | 2            | 5.9411 | 0.4643 |
| KAHQDIHTQLQDVK                 | 1661.8             | 2            | 3.9915 | 0.3759 |



| Peptide Sequence                            | Peptide mass (m/z) | Charge State | Xcorr  | DelCn2 |
|---------------------------------------------|--------------------|--------------|--------|--------|
| KAHQLWLSVEALK                               | 1523.8             | 2            | 4.1278 | 0.2993 |
| KAHSIKDMENTLQLVR                            | 1884.2             | 2            | 3.2755 | 0.279  |
| KAHVLAASVEQATENFLEK                         | 2086.3             | 2            | 6.3745 | 0.3589 |
| KAHVLAASVEQATENFLEKGDK                      | 2386.6             | 3            | 5.9048 | 0.4943 |
| KAIIFVVPVQLK                                | 1466.9             | 2            | 4.2886 | 0.313  |
| KAILEDMVR                                   | 1075.3             | 2            | 2.8401 | 0.1685 |
| KAIQESNDTNK                                 | 1248.3             | 2            | 3.4821 | 0.1725 |
| KAIQESNDTNKGK                               | 1433.5             | 2            | 3.959  | 0.2993 |
| KAIVICPTDEDLKDR                             | 1717.0             | 2            | 4.2325 | 0.3964 |
| KAKDDATLSGK                                 | 1134.3             | 2            | 3.2399 | 0.3838 |
| KAKDDATLSGKR                                | 1290.5             | 2            | 3.7176 | 0.4074 |
| KAKIDSYQEPFTHSAPESIPDTFEDAVNILKPSTIIGVAGAGR | 4573.1             | 3            | 3.9053 | 0.3427 |
| KAKKPAAAAGAK                                | 1112.4             | 2            | 3.0924 | 0.2235 |
| KAKKPAAATVTKK                               | 1342.7             | 3            | 3.5196 | 0.3805 |
| KAKPVKPK                                    | 896.2              | 2            | 2.4939 | 0.1278 |
| KAKTATPK                                    | 845.0              | 1            | 2.0373 | 0.1007 |
| KALAAAGYDVEK                                | 1236.4             | 2            | 4.5377 | 0.3963 |
| KALAAAGYDVEKNNSR                            | 1707.9             | 2            | 5.4351 | 0.4826 |
| KALDIAENEMPGLMR                             | 1689.0             | 2            | 4.003  | 0.3607 |
| KALDIAENKMPGLMR                             | 1688.1             | 2            | 2.5284 | 0.2257 |
| KALDSNSLENDLSDAPGREPGHFNPEER                | 3054.2             | 3            | 4.7902 | 0.2842 |
| KALEAQNEIHTK                                | 1382.5             | 2            | 3.5752 | 0.2389 |
| KALEQLNGFELAGRPMK                           | 1903.2             | 3            | 3.9846 | 0.2736 |
| KALEVFPEFAAAHSNLASVLQQQGK                   | 2685.0             | 3            | 5.425  | 0.3562 |
| KALIEVLQPLIAEHQAR                           | 1930.3             | 3            | 4.4235 | 0.327  |
| KALLALNHGLDK                                | 1293.5             | 2            | 2.8129 | 0.1988 |
| KALQDLGLR                                   | 1014.2             | 2            | 2.9639 | 0.1648 |
| KALTSFERDSIFSNTLQGLDYQGFEEK                 | 2996.3             | 3            | 5.9517 | 0.48   |
| KALXEVLQPLIAEHQAR                           | 1930.3             | 3            | 6.0713 | 0.3476 |
| KAMDFYDPAAR                                 | 1214.4             | 2            | 2.4537 | 0.1403 |
| KAMDFYDPAARHNEFDLDFISGTR                    | 2518.7             | 3            | 3.5311 | 0.3072 |
| KAMEAVAAQGK                                 | 1104.3             | 2            | 3.793  | 0.2371 |
| KAMEAVAAQGKA                                | 1175.4             | 2            | 4.331  | 0.2208 |
| KAMEGAGTDEK                                 | 1137.2             | 2            | 3.5345 | 0.3029 |
| KAMEGAGTDEKALIEILATR                        | 2118.4             | 3            | 5.2571 | 0.3444 |
| KAMEGTIDGSLINPTVIVDPFQILVAANK               | 3056.6             | 3            | 4.1804 | 0.305  |

| Peptide Sequence                | Peptide mass (m/z) | Charge State | Xcorr  | DelCn2 |
|---------------------------------|--------------------|--------------|--------|--------|
| KAMKGFGTDEQAIVDVVANR            | 2150.4             | 2            | 2.913  | 0.1184 |
| KAMKGLGTDEDAIISVLAYR            | 2152.5             | 2            | 5.1869 | 0.5662 |
| KANAEELANNLKQEGHNLGLLHGDMDSQSER | 3333.6             | 3            | 4.6904 | 0.4496 |
| KANDESNEHSDVIDSQELSK            | 2246.3             | 3            | 5.7848 | 0.502  |
| KANEDELKR                       | 1103.2             | 2            | 2.712  | 0.1229 |
| KANGPNYIQPQKR                   | 1514.7             | 2            | 2.5733 | 0.2032 |
| KANIPIMDTGENPEVPFPR             | 2126.4             | 2            | 5.1988 | 0.4341 |
| KANLQIDQINTDLNLER               | 1999.2             | 2            | 6.2357 | 0.3484 |
| KANNSQEPSPQLASSVASTR            | 2073.2             | 3            | 3.6737 | 0.3562 |
| KANPDLPIR                       | 1250.5             | 2            | 2.642  | 0.1472 |
| KANVVALVAEHSGEFEK               | 1999.3             | 3            | 5.116  | 0.451  |
| KAPAQKVPAQK                     | 1166.4             | 2            | 3.6344 | 0.3938 |
| KAPDFVYAPR                      | 1311.5             | 2            | 3.2091 | 0.3436 |
| KAPGFGFGSSAVSGGSTAAMITETIETDKPK | 3214.6             | 3            | 6.544  | 0.3926 |
| KAPPPLAAALAEAVSLLQTLSEFR        | 2875.3             | 3            | 5.5372 | 0.4054 |
| KAPPRPGVPPEAAQPFLFTPR           | 2274.7             | 2            | 3.8442 | 0.2662 |
| KAPSDLYQIILK                    | 1389.7             | 2            | 3.6952 | 0.3046 |
| KAPSEASAEQQR                    | 1302.4             | 2            | 3.5367 | 0.3556 |
| KAPTTDEDKAAEK                   | 1532.7             | 2            | 4.1686 | 0.3377 |
| KAPVKLESIASVFKDHAEEGTSEDGTPDEK  | 3344.6             | 3            | 3.3025 | 0.2599 |
| KAQCPIVER                       | 1044.3             | 2            | 2.7249 | 0.1196 |
| KAQDEGLLSDVVPFKVPGK             | 2028.3             | 3            | 4.8488 | 0.4122 |
| KAQDEGLLSDVVPFKVPGKDTVTK        | 2572.9             | 3            | 6.92   | 0.5039 |
| KAQDFHWLTR                      | 1302.5             | 2            | 2.9331 | 0.2129 |
| KAQDIETLKK                      | 1174.4             | 2            | 2.7318 | 0.1889 |
| KAQGHELGASR                     | 1154.3             | 2            | 3.6162 | 0.3537 |
| KAQLNIGNVLPVGTMPGIVCCLEEKPGDR   | 3283.8             | 3            | 5.8015 | 0.3967 |
| KAQPAQPADEPAEK                  | 1480.6             | 2            | 3.9858 | 0.3705 |
| KAQPAQPADEPAEKADPEMEH           | 2290.5             | 3            | 5.1265 | 0.4071 |
| KASAFNSWFENAEEDLTDPVR           | 2427.6             | 3            | 3.8394 | 0.2977 |
| KASDVHEVR                       | 1041.1             | 2            | 3.1035 | 0.2774 |
| KASELPVSEVASILQADLQNLNK         | 2525.8             | 3            | 4.3977 | 0.3728 |
| KASFASASAEVGKK                  | 1381.6             | 2            | 3.7654 | 0.3459 |
| KASFEEASNQLINHIEQFLDTNETPYFMK   | 3446.8             | 3            | 4.8978 | 0.3385 |
| KASGPPKGPSR                     | 1082.2             | 2            | 2.5606 | 0.1793 |
| KASGPPVSELITK                   | 1327.6             | 2            | 4.4399 | 0.427  |

| Peptide Sequence                | Peptide mass (m/z) | Charge State | Xcorr  | DelCn2 |
|---------------------------------|--------------------|--------------|--------|--------|
| KASSRLENLGIPEEELLRQQQELFAK      | 3028.4             | 3            | 4.7812 | 0.3349 |
| KASSVETKPGASK                   | 1290.4             | 2            | 2.8281 | 0.1345 |
| KASVVTLPVYLNFR                  | 1709.0             | 2            | 2.5074 | 0.2482 |
| KATATISAKPQITNPK                | 1669.9             | 3            | 3.3567 | 0.2646 |
| KATDAEADVASLNR                  | 1461.6             | 2            | 3.5692 | 0.2863 |
| KATDAEADVASLNRR                 | 1617.7             | 2            | 2.8628 | 0.2379 |
| KATEGSGSMR                      | 1024.1             | 2            | 2.5999 | 0.1905 |
| KATGAATPK                       | 845.0              | 2            | 3.1709 | 0.2447 |
| KATGAATPKK                      | 973.2              | 2            | 2.7922 | 0.1544 |
| KATGPPVSELITK                   | 1341.6             | 2            | 3.5884 | 0.3324 |
| KATLELTHNWGTEDDATQSYHNGNSDPR    | 3159.2             | 3            | 4.8693 | 0.3754 |
| KATPGAHTGAIPK                   | 1249.4             | 2            | 2.619  | 0.1182 |
| KATQASQEY                       | 1026.1             | 2            | 2.5042 | 0.1284 |
| KATVDMLQAEGR                    | 1376.6             | 2            | 3.7443 | 0.3382 |
| KATVNLLGEEK                     | 1202.4             | 2            | 3.0767 | 0.2434 |
| KATVNLLGEEKK                    | 1330.6             | 3            | 3.9551 | 0.2603 |
| KAVAEIEEMCNILK                  | 1591.9             | 2            | 5.2927 | 0.2964 |
| KAVAEIEEMCNILKTEGTVR            | 2334.7             | 3            | 4.2719 | 0.1736 |
| KAVAISLPK                       | 927.2              | 2            | 2.4876 | 0.2725 |
| KAVASVAKK                       | 902.1              | 2            | 3.5799 | 0.1063 |
| KAVDEAADALLK                    | 1244.4             | 2            | 4.0136 | 0.3565 |
| KAVEAAQLAEDLKVQLEHVQTR          | 2477.8             | 3            | 5.9487 | 0.4306 |
| KAVEEPLNAFK                     | 1246.4             | 2            | 2.614  | 0.1489 |
| KAVEEPLNAFKESK                  | 1590.8             | 2            | 3.1564 | 0.1914 |
| KAVEKPPQTEHIEL                  | 1619.8             | 2            | 3.2731 | 0.1959 |
| KAVLASMDNENMHTPDIGGQGTSEAIQDVIR | 3400.7             | 3            | 6.9931 | 0.4355 |
| KAVLFCLSEDKK                    | 1381.7             | 3            | 4.653  | 0.3212 |
| KAVLTPNHVEFSR                   | 1498.7             | 2            | 4.161  | 0.3123 |
| KAVLVALK                        | 842.1              | 2            | 2.6302 | 0.1199 |
| KAVLVALKER                      | 1127.4             | 2            | 2.5773 | 0.1803 |
| KAVPKEDIYSGGGGGSR               | 1735.9             | 2            | 4.3431 | 0.3845 |
| KAVTDFTSEVTYDPAGR               | 1858.0             | 2            | 3.6418 | 0.2909 |
| KAVTHAIPALQPIVHDLFVLR           | 2339.8             | 3            | 4.3475 | 0.3142 |
| KAVTPAPPIKR                     | 1178.5             | 2            | 3.1737 | 0.29   |
| KAVVEKPAR                       | 998.2              | 2            | 2.6738 | 0.3511 |
| KAVVCPKDEDYK                    | 1494.7             | 2            | 2.8204 | 0.1863 |

| Peptide Sequence                      | Peptide mass (m/z) | Charge State | Xcorr  | DelCn2 |
|---------------------------------------|--------------------|--------------|--------|--------|
| KAVVVCPKDEDYKQR                       | 1779.1             | 3            | 3.8451 | 0.3224 |
| KAYADFYR                              | 1034.1             | 2            | 2.5362 | 0.2014 |
| KAYGQALAK                             | 950.1              | 2            | 2.88   | 0.2174 |
| KAYLEPEHTK                            | 1216.4             | 2            | 2.8678 | 0.1722 |
| KAYWQVHLDQVEVASGLTLCK                 | 2389.8             | 3            | 4.3258 | 0.3448 |
| KCEVLCSQSNKPVTLTVEQSR                 | 2350.7             | 3            | 4.556  | 0.204  |
| KDAEAWFTSR                            | 1211.3             | 2            | 3.2023 | 0.2552 |
| KDAENHEAQLK                           | 1283.4             | 2            | 3.8617 | 0.3057 |
| KDAFADAVQR                            | 1121.2             | 2            | 2.9101 | 0.2352 |
| KDAHSNLLAK                            | 1097.3             | 2            | 3.3227 | 0.2203 |
| KDAHSTLLSK                            | 1100.3             | 2            | 3.3188 | 0.2706 |
| KDAHSTLLSKK                           | 1228.4             | 2            | 3.2637 | 0.2488 |
| KDCEVMMIGLPGAGK                       | 1649.0             | 2            | 2.9459 | 0.2103 |
| KDDEENYLDLFSHK                        | 1753.8             | 2            | 5.2501 | 0.4249 |
| KDDEVQVVR                             | 1088.2             | 2            | 3.0808 | 0.2694 |
| KDDPLTNLNTAFDVAEK                     | 1892.1             | 2            | 4.4863 | 0.4138 |
| KDDPLTNLNTAFDVAEKYLDIPK               | 2621.9             | 3            | 6.4849 | 0.4893 |
| KDDPTLLSSGR                           | 1189.3             | 2            | 2.7595 | 0.1939 |
| KDDPVTNLNNAFEVAEK                     | 1905.1             | 3            | 5.7982 | 0.4283 |
| KDDPVTNLNNAFEVAEKYLDIPK               | 2634.9             | 3            | 5.0656 | 0.3586 |
| KDDTDDEIAK                            | 1150.2             | 2            | 2.6877 | 0.1017 |
| KDDTDDEIAKYDGK                        | 1613.7             | 2            | 4.6463 | 0.4274 |
| KDDTDDEIAKYDGKWEVEEMKESK              | 2890.1             | 3            | 5.6425 | 0.2921 |
| KDDVTSSTGPHK                          | 1272.3             | 2            | 3.4863 | 0.288  |
| KDEEGQKEEDKPR                         | 1588.7             | 2            | 3.3221 | 0.1721 |
| KDEENDSKAPPHELTEEEKQQILHSEEFLSFFDHSTR | 4429.7             | 3            | 4.7559 | 0.2671 |
| KDEESGGGSNPFQHLEK                     | 1859.9             | 3            | 3.2101 | 0.1098 |
| KDEKDTLEDLFPTTK                       | 1882.1             | 2            | 5.1605 | 0.408  |
| KDEKDTLEDLFPTTKIPNPR                  | 2459.7             | 3            | 4.9889 | 0.3482 |
| KDENKVDGMNAPK                         | 1446.6             | 2            | 4.4788 | 0.2771 |
| KDEPDAFKELGTGNR                       | 1677.8             | 2            | 3.8735 | 0.2961 |
| KDEQEHEFYK                            | 1353.4             | 2            | 2.7107 | 0.1667 |
| KDETNVK                               | 833.9              | 1            | 1.7399 | 0.1108 |
| KDFSSVFQFLR                           | 1374.6             | 2            | 3.3167 | 0.3137 |
| KDFSSVFQFLREEETF                      | 2010.2             | 2            | 3.6234 | 0.3456 |
| KDFVSEQLTSLLVNGVQLPALGENKK            | 2829.2             | 3            | 5.1224 | 0.363  |

| Peptide Sequence                       | Peptide mass (m/z) | Charge State | Xcorr  | DelCn2 |
|----------------------------------------|--------------------|--------------|--------|--------|
| KDGADFAK                               | 851.9              | 1            | 2.1491 | 0.1284 |
| KDGLVSLTTSEGADEPQRLQFPLPTAQR           | 3169.5             | 3            | 4.2784 | 0.3754 |
| KDGNASGTMLLEALDCILPPTTRPTDKPLRLPLQDVYK | 4081.8             | 3            | 4.6771 | 0.3455 |
| KDGNASGTMLLEALDCILPPTTRPTDK            | 2728.1             | 3            | 4.6229 | 0.346  |
| KDGNASGTMLLEALDCILPPTTRPTDKPLR         | 3094.5             | 3            | 5.6253 | 0.4205 |
| KDGNASGTMLLEALDCILPPTTRPTDKPLRLPLQDVYK | 4051.7             | 3            | 5.3575 | 0.4607 |
| KDHPFGFVAVPTK                          | 1443.7             | 2            | 2.565  | 0.1348 |
| KDHRDNLEFFLAGIGR                       | 1889.1             | 3            | 4.734  | 0.3155 |
| KDILLVNDHLLNFVR                        | 1810.1             | 2            | 3.4922 | 0.3418 |
| KDKDPVNK                               | 944.1              | 2            | 3.1609 | 0.184  |
| KDKELYTQNGILHMLDR                      | 2075.4             | 3            | 4.5898 | 0.3404 |
| KDKFSFDLGKGEVIK                        | 1712.0             | 3            | 3.2444 | 0.1383 |
| KDLKDYFSK                              | 1144.3             | 2            | 2.7889 | 0.1687 |
| KDLKDYFTK                              | 1158.3             | 2            | 2.8406 | 0.1707 |
| KDLYANTVLSGGTTMYPGIADR                 | 2344.6             | 3            | 6.5531 | 0.5332 |
| KDLYEPETHGGK                           | 1245.4             | 2            | 3.7354 | 0.2825 |
| KDMMKNAESKLSKDNLKKR                    | 2352.8             | 3            | 3.3335 | 0.1061 |
| KDMSGHYQNALYLGDVSR                     | 2184.4             | 3            | 3.3252 | 0.2162 |
| KDNDFIYHDR                             | 1323.4             | 2            | 3.3468 | 0.1715 |
| KDNDFIYHDRVPDLKDLDPGK                  | 2614.9             | 3            | 4.9133 | 0.2162 |
| KDPEGLFLQDNIVAIEFSVDETQMSATAK          | 3142.4             | 3            | 5.7271 | 0.4963 |
| KDPELWGSVLLESNPYR                      | 2004.2             | 2            | 2.9341 | 0.2857 |
| KDPSKNQGGGLSSSGAGEGQGPK                | 2144.2             | 2            | 2.9646 | 0.2003 |
| KDPSKNQGGGLSSSGAGEGQGPKK               | 2272.4             | 3            | 4.0827 | 0.269  |
| KDQGELER                               | 975.0              | 1            | 2.4451 | 0.1446 |
| KDQGELERQLLQANPILEAFGNAK               | 2684.0             | 3            | 5.0997 | 0.3018 |
| KSDSFK                                 | 826.9              | 1            | 2.3676 | 0.1272 |
| KDSETGENIR                             | 1149.2             | 2            | 2.8607 | 0.2509 |
| KDSLVSNEFK                             | 1167.3             | 2            | 2.5158 | 0.1387 |
| KDSLVSNEFKELVTQQLPHLLK                 | 2568.0             | 3            | 3.4117 | 0.2227 |
| KDVDEAYMNK                             | 1213.3             | 2            | 3.4318 | 0.2691 |
| KDVDEAYMNKVELESR                       | 1927.1             | 2            | 5.0525 | 0.4231 |
| KDVDEAYMNKVELESRLGLELTDEINFLR          | 3328.7             | 3            | 3.687  | 0.1786 |
| KDVKDKETTENENTK                        | 1779.9             | 2            | 4.6276 | 0.3393 |
| KDVKDKETTENENTKFE                      | 2056.2             | 2            | 4.3728 | 0.3988 |
| KDVKDKETTENENTKFEV                     | 2155.3             | 2            | 5.0482 | 0.3791 |

| Peptide Sequence                          | Peptide mass (m/z) | Charge State | Xcorr  | DelCn2 |
|-------------------------------------------|--------------------|--------------|--------|--------|
| KDVKDKETTENENTKFEVR                       | 2311.5             | 2            | 5.588  | 0.4392 |
| KDVKDKETTENENTKFEVRL                      | 2424.6             | 3            | 4.8102 | 0.3574 |
| KDVLTAHPAAPGPVSR                          | 1616.8             | 2            | 4.8798 | 0.4748 |
| KDVSCPIRQVPTGK                            | 1528.8             | 2            | 2.6397 | 0.1    |
| KDVYVQLYLQHLTAR                           | 1848.1             | 3            | 5.1725 | 0.4558 |
| KDWSALSSLAR                               | 1234.4             | 2            | 3.3851 | 0.2823 |
| KEAAENSLVAYK                              | 1323.5             | 2            | 3.806  | 0.3563 |
| KEAEGTEEGGEEEDDEEMDPQTIDSLIELSTK          | 3555.6             | 3            | 6.7382 | 0.4481 |
| KEAESCDCMQGFQLTHSLGGGTGSGMGTLISK          | 3327.8             | 3            | 6.9734 | 0.3319 |
| KEAESCDCMQGFQLTHSLGGGTGSGMGTLISK          | 3327.8             | 3            | 6.4863 | 0.3719 |
| KEAESSPFVER                               | 1279.4             | 2            | 3.5584 | 0.2962 |
| KEAPPMEKPEVVK                             | 1482.8             | 2            | 4.6244 | 0.3414 |
| KEAVQTAAK                                 | 946.1              | 2            | 2.5139 | 0.1867 |
| KEDALLYQSK                                | 1195.3             | 2            | 2.696  | 0.1726 |
| KEDFSEATLK                                | 1168.3             | 2            | 2.5332 | 0.1819 |
| KEDLVFIFWAPESAPLK                         | 1991.3             | 2            | 5.4102 | 0.3122 |
| KEDLYLKPIQR                               | 1403.7             | 2            | 3.7355 | 0.2743 |
| KEDMTYAVR                                 | 1113.3             | 2            | 2.9095 | 0.2701 |
| KEDTLAFSEWGSPPHAAVPR                      | 2099.3             | 2            | 6.3642 | 0.5542 |
| KEEDSHTTLHETPTTGNHYPSNHQP                 | 2858.9             | 3            | 4.512  | 0.2715 |
| KEEEAVLVGGEWSPSLDGLDPQADPQVLVR            | 3235.5             | 3            | 5.7128 | 0.4224 |
| KEEEEAEDKEDDEDKDEDEEEDKEEEDVEEEDVPGQAKDEL | 4886.7             | 3            | 7.041  | 0.4299 |
| KEEEEEEEYDEGSNLKK                         | 2215.2             | 3            | 5.799  | 0.2058 |
| KEEESQPAKK                                | 1303.4             | 2            | 2.9261 | 0.1816 |
| KEEEGSANRRPEDQELESLSAIEAELEK              | 3188.4             | 3            | 5.6382 | 0.4053 |
| KEEEGSANRRPEDQELESLSAIEAELEKVAHQALR       | 4205.6             | 3            | 3.7396 | 0.1082 |
| KEEEKEELMEWWK                             | 1795.0             | 2            | 4.1821 | 0.1831 |
| KEEELQAALAR                               | 1258.4             | 2            | 3.0427 | 0.1392 |
| KEEELQGALAR                               | 1244.4             | 2            | 2.916  | 0.1264 |
| KEEGEAFAR                                 | 1037.1             | 1            | 2.7891 | 0.2215 |
| KEEHLSIEDFTQAFGMTPAAFSALPR                | 2895.2             | 3            | 5.7682 | 0.399  |
| KEEIIKTLKKEEETK                           | 1806.0             | 2            | 5.1158 | 0.3235 |
| KEELEEEELDEAVER                           | 1718.8             | 2            | 5.232  | 0.3522 |
| KEELMFFLWAPLAPLK                          | 2063.5             | 2            | 5.337  | 0.3189 |
| KEEPKLPQQSHSAFGATSSSSGFGK                 | 2593.8             | 3            | 5.7842 | 0.5051 |
| KEEQEVQATLESEEVDLNAGLHGNWTLNAK            | 3483.7             | 3            | 5.9636 | 0.422  |

| Peptide Sequence                      | Peptide mass (m/z) | Charge State | Xcorr  | DelCn2 |
|---------------------------------------|--------------------|--------------|--------|--------|
| KEESETANKNDSSK                        | 1567.6             | 2            | 2.9618 | 0.2099 |
| KEETQPPVALKK                          | 1368.6             | 2            | 2.5512 | 0.1021 |
| KEFGGGHIKDELFGTVKDDLSFAGYQK           | 2988.3             | 3            | 3.4591 | 0.252  |
| KEFLHAQEEVKR                          | 1514.7             | 2            | 3.9337 | 0.3151 |
| KEFSPFGTITSAK                         | 1413.6             | 2            | 3.7719 | 0.3268 |
| KEFTLEFSR                             | 1157.3             | 2            | 2.7399 | 0.2664 |
| KEGDLIAAQAR                           | 1172.3             | 2            | 3.5384 | 0.3183 |
| KEGGLGPLNIPLLADVTR                    | 1864.2             | 2            | 6.0386 | 0.5212 |
| KEGGLGPLNIPLLADVTRR                   | 2020.4             | 3            | 3.9046 | 0.3643 |
| KEGLSFLGGLR                           | 1177.4             | 2            | 2.5579 | 0.1216 |
| KEGNASGVSLLEALDTILPPTRPTDKPLR         | 3090.5             | 3            | 4.4954 | 0.4171 |
| KEGNASGVSLLEALDTILPPTRPTDKPLRLPLQDVYK | 4047.6             | 3            | 5.5004 | 0.5053 |
| KEGPYDVVVLPGGNLGAQNLSESAVK            | 2714.0             | 3            | 4.1172 | 0.1596 |
| KEGPYDVVVLPGGNLGAQNLSESAVKEILKEQENR   | 3854.3             | 3            | 3.6306 | 0.103  |
| KEGSDGPLATSKPVPAEK                    | 1812.0             | 3            | 3.8626 | 0.3221 |
| KEGTGSTATSSSSTAGAAGK                  | 1756.8             | 2            | 5.9061 | 0.4713 |
| KEHDILSQLQK                           | 1339.5             | 2            | 3.3957 | 0.2716 |
| KEIADYLAAGKDER                        | 1579.7             | 2            | 4.1505 | 0.3495 |
| KEICKFYLQGYCTKGENCIYMHNE              | 2916.4             | 3            | 4.7363 | 0.1041 |
| KEIEDAAQFATADPEPPLEELGYHIYSSDPPFEVR   | 3963.3             | 3            | 3.8591 | 0.2883 |
| KEIHTVPDMGK                           | 1255.5             | 2            | 4.1518 | 0.3304 |
| KEKEEEELFPESERPEMLSEQEHMSISGSSAR      | 3738.0             | 3            | 7.0648 | 0.4219 |
| KEKEPEYTLTTER                         | 1636.8             | 2            | 3.1221 | 0.112  |
| KEKSDVGSSDESAVSIFHELK                 | 2321.5             | 3            | 3.382  | 0.1664 |
| KELDEETER                             | 1149.2             | 2            | 2.5297 | 0.1073 |
| KELEEDFIKSELKK                        | 1737.0             | 2            | 5.0908 | 0.3061 |
| KELENLAAMDLELQK                       | 1746.0             | 2            | 2.6766 | 0.1436 |
| KELQAAGKSPEDLER                       | 1671.8             | 2            | 4.6268 | 0.4296 |
| KELQELSSSIKDLVLK                      | 1831.1             | 2            | 2.8065 | 0.1583 |
| KELSDIAHR                             | 1069.2             | 2            | 3.1406 | 0.3401 |
| KEMTNEEKNIITNLSK                      | 1893.2             | 2            | 3.2733 | 0.3492 |
| KENEEEPQSAPK                          | 1386.4             | 2            | 4.0185 | 0.1877 |
| KENESLTHSTDR                          | 1417.5             | 2            | 3.1705 | 0.2435 |
| KENIKDEK                              | 1004.1             | 2            | 2.4592 | 0.1002 |
| KENISKEEER                            | 1262.4             | 2            | 2.9515 | 0.1993 |
| KENSETTLTR                            | 1179.3             | 2            | 2.9992 | 0.1192 |

| Peptide Sequence                 | Peptide mass (m/z) | Charge State | Xcorr  | DelCn2 |
|----------------------------------|--------------------|--------------|--------|--------|
| KENSETVVTGSLDDLK                 | 1835.0             | 2            | 3.1899 | 0.1567 |
| KEPAVLELEGKK                     | 1341.6             | 2            | 3.8173 | 0.3557 |
| KEPEKPIDREK                      | 1369.5             | 2            | 2.4479 | 0.2335 |
| KEPFTLEAYYSSPQDLPPDPPIAQFSVQK    | 3431.8             | 3            | 5.4622 | 0.2874 |
| KEPVGDDSEVPENVLSFDDLTADALANLK    | 3103.3             | 3            | 4.6336 | 0.2518 |
| KEPVQDDSDLDR                     | 1417.5             | 2            | 2.8857 | 0.1447 |
| KEQTADGVAVIPVLQR                 | 1725.0             | 3            | 3.4455 | 0.3079 |
| KEQTPEHGK                        | 1054.1             | 2            | 2.4333 | 0.2533 |
| KERGRRGEGEREK                    | 1587.7             | 2            | 2.4921 | 0.2016 |
| KESESCDCLQGFQLTHSLGGGTGSGMGTLISK | 3343.8             | 3            | 4.7939 | 0.3163 |
| KESKDQLSDDVSK                    | 1479.6             | 2            | 4.8376 | 0.3707 |
| KESKDQLSDDVSKVIAYLK              | 2167.4             | 3            | 5.6284 | 0.4127 |
| KESKDQLSDDVSKVIAYLKR             | 2323.6             | 3            | 5.2411 | 0.4491 |
| KESKEETPEVTK                     | 1405.5             | 2            | 4.608  | 0.3109 |
| KESLDVYELDAK                     | 1410.6             | 2            | 3.6647 | 0.4126 |
| KESLQNLLHSSR                     | 1412.6             | 2            | 3.1828 | 0.2854 |
| KESYSIYVYK                       | 1280.5             | 3            | 3.7275 | 0.3811 |
| KESYSVYVYK                       | 1266.4             | 2            | 3.6702 | 0.3897 |
| KETEGDVTSVKDAK                   | 1507.6             | 2            | 3.9819 | 0.3751 |
| KETPPKEVK                        | 1056.2             | 2            | 2.9246 | 0.1028 |
| KETSGTQGIEGHLK                   | 1485.6             | 2            | 3.962  | 0.3975 |
| KETSKDTETVLK                     | 1379.5             | 2            | 3.0592 | 0.1541 |
| KEVEVVEIIQATIIR                  | 1741.1             | 2            | 5.3274 | 0.4242 |
| KEVKGDLENAFLNLVQCIQNKPLYFADR     | 3267.7             | 3            | 5.3332 | 0.4487 |
| KEVKLPGK                         | 899.1              | 2            | 2.499  | 0.1095 |
| KEVLASPDR                        | 1015.1             | 2            | 2.4982 | 0.125  |
| KEVQDEEK                         | 1005.1             | 2            | 2.6453 | 0.1093 |
| KEVTEEEKTKEEKPEAK                | 2033.2             | 3            | 4.1672 | 0.3338 |
| KEVVEEAENGR                      | 1260.3             | 2            | 3.7273 | 0.2783 |
| KEWHGPPSQGPSYHDTR                | 1980.1             | 3            | 3.3273 | 0.2899 |
| KEWSGLLEELAR                     | 1431.6             | 2            | 2.4404 | 0.1571 |
| KEYGGLDVLVNNAGIAFK               | 1909.2             | 3            | 5.1499 | 0.4221 |
| KFAADAVK                         | 850.0              | 2            | 2.7737 | 0.1683 |
| KFAADAVKLER                      | 1248.5             | 3            | 3.6919 | 0.2534 |
| KFAEAFEAIPIR                     | 1279.5             | 2            | 3.3597 | 0.3546 |
| KFAEALGSTEAK                     | 1252.4             | 2            | 3.0631 | 0.2166 |



| Peptide Sequence            | Peptide mass (m/z) | Charge State | Xcorr  | DelCn2 |
|-----------------------------|--------------------|--------------|--------|--------|
| KFAENPKAGDEFVEK             | 1709.9             | 2            | 4.5841 | 0.2314 |
| KFAPVVAPKPK                 | 1182.5             | 2            | 2.9916 | 0.2496 |
| KFAREEIIPVAAEYDK            | 1880.1             | 2            | 2.9318 | 0.2263 |
| KFAREEIIPVAAEYDKTGEYPVPLIR  | 3006.4             | 3            | 7.001  | 0.4944 |
| KFAREEIIPVAAEYDKTGEYPVPLIRR | 3162.6             | 3            | 4.366  | 0.2812 |
| KFAYGYIEDLK                 | 1347.5             | 2            | 2.6485 | 0.1746 |
| KFAYLGR                     | 855.0              | 2            | 2.6376 | 0.1157 |
| KFDDENFILK                  | 1269.4             | 2            | 3.2237 | 0.1199 |
| KFDDFQKDLK                  | 1284.4             | 2            | 3.6048 | 0.2256 |
| KFDEALK                     | 851.0              | 2            | 2.6324 | 0.1132 |
| KFDEGRADFPVDEELGLDLGDLR     | 2694.9             | 3            | 5.9505 | 0.3991 |
| KFDEGRNNEFEVTKENLLDFIK      | 2744.0             | 3            | 4.9508 | 0.2858 |
| KFDKKDEESGGGSPFQHLEK        | 2378.5             | 3            | 5.742  | 0.3821 |
| KFDLGQDVIDFTGHALALYR        | 2280.6             | 3            | 7.3536 | 0.6039 |
| KFDLNSPWEAFPVYR             | 1870.1             | 2            | 4.6026 | 0.4961 |
| KFDLNSPWEAFPVYRQPPELK       | 2650.0             | 3            | 3.9123 | 0.3135 |
| KFDQLLAEEK                  | 1221.4             | 2            | 3.2668 | 0.1784 |
| KFDQLLAEEKAAVLR             | 1732.0             | 3            | 3.7918 | 0.3339 |
| KFDQLLAEEKTISAK             | 1722.0             | 2            | 5.0642 | 0.3416 |
| KFDVNTSAVQVLIHIGNLDR        | 2369.7             | 3            | 6.8139 | 0.496  |
| KFEDEYSEYLKHNVR             | 1958.1             | 2            | 5.013  | 0.4846 |
| KFEEDLLLLLEDQNSK            | 1822.0             | 2            | 4.4717 | 0.2497 |
| KFEEEGNPYYSSAR              | 1677.8             | 2            | 4.3834 | 0.3251 |
| KFEEIPIAHK                  | 1325.6             | 2            | 4.0207 | 0.2094 |
| KFEEMNAELEENKELAQNR         | 2323.5             | 3            | 3.9816 | 0.2673 |
| KFEHQLLYNACQLDNPDEQAAQIR    | 2846.1             | 3            | 6.2862 | 0.3505 |
| KFEHQLLYNACQLDNPDEQAAQIRR   | 3002.3             | 3            | 3.634  | 0.2051 |
| KFEKPVLTLTEQPKPLTK          | 2098.5             | 3            | 4.645  | 0.3755 |
| KFERHTLLEYLLGEGNL           | 2033.3             | 3            | 5.1153 | 0.1278 |
| KFFDANYDGKDYDPVAAR          | 2093.2             | 3            | 5.8332 | 0.4317 |
| KFFDANYDGKDYNPLLAR          | 2148.4             | 3            | 3.7953 | 0.2736 |
| KFFKFQVLK                   | 1185.5             | 2            | 2.8092 | 0.1047 |
| KFFLSHPSYR                  | 1282.5             | 2            | 2.8396 | 0.2455 |
| KFGDPVVQSDMK                | 1351.6             | 2            | 3.9136 | 0.3471 |
| KFGDPVVQSDMKHWPVQVINDGDKPK  | 3014.4             | 3            | 6.1806 | 0.357  |
| KFGEAIGMGFPVK               | 1381.7             | 2            | 2.438  | 0.1263 |

| Peptide Sequence              | Peptide mass (m/z) | Charge State | Xcorr  | DelCn2 |
|-------------------------------|--------------------|--------------|--------|--------|
| KFGEAIGMGFPVKVPYR             | 1897.3             | 3            | 4.5205 | 0.3801 |
| KFGEEIAR                      | 950.1              | 2            | 2.5774 | 0.1416 |
| KFGTINIVHPK                   | 1254.5             | 2            | 2.6547 | 0.1833 |
| KFGVVLDEIKPSSAPELQAVR         | 2284.6             | 2            | 5.8531 | 0.4337 |
| KFGYVDFESAEDLEK               | 1777.9             | 2            | 5.261  | 0.4221 |
| KFGYVDFESAEDLEKALELTGLK       | 2603.9             | 3            | 6.3672 | 0.4599 |
| KFHETVIAALLR                  | 1398.7             | 2            | 2.4122 | 0.2568 |
| KFIAYQFTDTPLQIK               | 1814.1             | 2            | 3.3475 | 0.262  |
| KFIDIAAAK                     | 977.2              | 2            | 2.7374 | 0.1628 |
| KFIQENIFGICPHMTEDNKDLIQGK     | 2920.4             | 3            | 5.4408 | 0.4029 |
| KFISDKDASIVGFFDDSFSEAHSEFLK   | 3068.3             | 3            | 7.8276 | 0.5447 |
| KFIWTNHKFNVTGTPEQYVPYSTTR     | 3016.4             | 3            | 4.4008 | 0.341  |
| KFKDNTEPGHFQTLLQK             | 2032.3             | 3            | 4.1552 | 0.3123 |
| KFKGDSR                       | 837.9              | 1            | 1.8188 | 0.1408 |
| KFLALLREEGASPLDFD             | 1922.2             | 2            | 4.0583 | 0.3537 |
| KFLDAGHK                      | 916.1              | 2            | 2.6556 | 0.1917 |
| KFLDAGHKLNFAVASR              | 1775.0             | 2            | 5.1891 | 0.445  |
| KFLDGIYVSEK                   | 1299.5             | 2            | 3.129  | 0.2833 |
| KFLDGIYVSEKGTVQQADE           | 2128.3             | 2            | 4.3223 | 0.3773 |
| KFLDTSHYSTAGSSSVR             | 1844.0             | 2            | 4.5376 | 0.4041 |
| KFLEEQEITDLK                  | 1493.7             | 2            | 4.3665 | 0.2051 |
| KFLEHLSGAGK                   | 1187.4             | 2            | 3.3688 | 0.3232 |
| KFLPLFDR                      | 1036.3             | 2            | 2.4579 | 0.1503 |
| KFLSDPQVHTVLVER               | 1769.0             | 3            | 5.1496 | 0.4005 |
| KFLSVLER                      | 992.2              | 2            | 2.5685 | 0.1299 |
| KFMHVLYPR                     | 1191.5             | 2            | 2.8235 | 0.1422 |
| KFMNPFNMPNLYQK                | 1773.1             | 2            | 3.8835 | 0.3408 |
| KFMQDPMEIFVDDETK              | 1974.2             | 2            | 2.996  | 0.1348 |
| KFMQDPMEIFVDDETKLTLLHGLQQYYVK | 3418.9             | 3            | 4.9947 | 0.3128 |
| KFNALFAQGNYSEAAK              | 1759.9             | 2            | 5.9808 | 0.5175 |
| KFNALKVPVPEDK                 | 1485.8             | 2            | 4.0906 | 0.3207 |
| KFNALKVPVPEDKYTAQVDAEEKEDVK   | 3092.4             | 3            | 6.0509 | 0.4704 |
| KFNILGTHTK                    | 1159.4             | 2            | 2.6774 | 0.1833 |
| KFNILGTNTK                    | 1136.3             | 2            | 2.602  | 0.1131 |
| KFPPEAAEGGGGAGLVGGR           | 1759.9             | 2            | 2.5061 | 0.1374 |
| KFPFCDGAHTK                   | 1251.4             | 3            | 3.2981 | 0.2687 |

| Peptide Sequence             | Peptide mass (m/z) | Charge State | Xcorr  | DelCn2 |
|------------------------------|--------------------|--------------|--------|--------|
| KFPHLAEAQK                   | 1169.4             | 2            | 3.1105 | 0.2403 |
| KFPSGTFEQVSQLVK              | 1695.9             | 2            | 4.8821 | 0.4357 |
| KFPVFNPAEEELCQVEEGDKEDVDK    | 2997.2             | 3            | 4.7432 | 0.3491 |
| KFPVFNPAEEELCQVEEGDKEDVDKAVK | 3295.6             | 3            | 6.4818 | 0.4783 |
| KFSKEEPVSSGPEEAVGK           | 1906.1             | 3            | 3.2901 | 0.2472 |
| KFSLAKRLQGDK                 | 1391.6             | 2            | 2.4789 | 0.1779 |
| KFSLDALITHVLPFEK             | 1859.2             | 3            | 5.2195 | 0.3595 |
| KFSLDALITHVLPFEKINEGFDLLHSGK | 3170.6             | 3            | 4.1646 | 0.3847 |
| KFSLDALITNILPFEK             | 1850.2             | 2            | 5.027  | 0.3687 |
| KFSLDALITNILPFEKINEGFDLLR    | 2908.4             | 3            | 4.9426 | 0.3043 |
| KFSSFFKSLVIELDK              | 1789.1             | 2            | 2.4556 | 0.1039 |
| KFSYDLSQCINQMK               | 1706.0             | 2            | 3.7081 | 0.2415 |
| KFTFGLDWVPK                  | 1338.6             | 2            | 3.2202 | 0.2551 |
| KFTGEQPSISGTFGLK             | 1697.9             | 2            | 2.4573 | 0.1423 |
| KFTGIKHEWQVNGLDLDDIKDR       | 2400.7             | 3            | 4.0368 | 0.3316 |
| KFVADGIFK                    | 1025.2             | 2            | 2.7082 | 0.2156 |
| KFVADGIFKAELNEFLTR           | 2099.4             | 2            | 4.8939 | 0.4092 |
| KFVEEQHTK                    | 1146.3             | 2            | 2.7447 | 0.1774 |
| KFVETPGQK                    | 1034.2             | 1            | 2.4762 | 0.1997 |
| KFVGGSGQVSER                 | 1251.4             | 2            | 3.9172 | 0.3286 |
| KFVHLLDQSDQDFQEELDLMK        | 2579.9             | 3            | 6.2958 | 0.4956 |
| KFVHPTLSSK                   | 1144.3             | 2            | 2.4425 | 0.2278 |
| KFVIHPESNNLIIIETDHNAYTEATK   | 2999.3             | 3            | 6.2316 | 0.3546 |
| KFVIPDFMSFTSHIDELYESAK       | 2605.9             | 3            | 4.8357 | 0.438  |
| KFVIPDFMSFTSHIDELYESAKK      | 2734.1             | 3            | 3.6095 | 0.3145 |
| KFVLCPECENPETDLHVNPK         | 2313.6             | 3            | 4.6085 | 0.3684 |
| KFVMKPPQVVR                  | 1329.7             | 2            | 3.0689 | 0.213  |
| KFYDANYDGKEYDPVEAR           | 2181.3             | 3            | 3.5159 | 0.3095 |
| KFYGPEGPYGVFAGR              | 1645.8             | 3            | 4.7542 | 0.4738 |
| KFYPLEIDYGQDEEAVKK           | 2173.4             | 2            | 4.4883 | 0.4088 |
| KFYPLEIDYGQDEEAVKKLTVNPGTK   | 2984.3             | 3            | 4.7971 | 0.4078 |
| KGAAFGFNVIATR                | 1352.6             | 2            | 2.7633 | 0.2042 |
| KGAAPAPPVK                   | 894.1              | 2            | 3.2401 | 0.2325 |
| KGAAYGLAGLVK                 | 1148.4             | 2            | 3.1056 | 0.2694 |
| KGADLNLVDSLGYNALHYSK         | 2179.4             | 3            | 5.2765 | 0.4225 |
| KGAGDGSDEEVDGKADGAEAKPAE     | 2304.3             | 3            | 4.5179 | 0.3224 |

| Peptide Sequence                  | Peptide mass (m/z) | Charge State | Xcorr  | DelCn2 |
|-----------------------------------|--------------------|--------------|--------|--------|
| KGAGSVFR                          | 821.9              | 2            | 2.4293 | 0.1384 |
| KGANLLLSASPDFGDIIVSHVGVVPTHGFSSFK | 3427.9             | 3            | 6.1101 | 0.4726 |
| KGAVAEDGDDEL                      | 1260.3             | 2            | 3.4791 | 0.3586 |
| KGAVAEDGDDELRTPEAK                | 1916.0             | 2            | 5.221  | 0.4047 |
| KGAVQKVSKKLEMHVYSK                | 2061.5             | 3            | 3.4698 | 0.1311 |
| KGAVTGGEEAK                       | 1047.1             | 2            | 2.5681 | 0.2287 |
| KGDECELLGHSK                      | 1316.5             | 2            | 2.472  | 0.147  |
| KGDEV DGVDEVAK                    | 1361.4             | 2            | 3.8988 | 0.3061 |
| KGDEYIINGQK                       | 1265.4             | 2            | 4.1901 | 0.3547 |
| KGDI FLVR                         | 948.1              | 2            | 2.7582 | 0.1883 |
| KGDIILGGLFPIHFGVAAK               | 1954.3             | 2            | 3.9903 | 0.3333 |
| KGDIILGGLFPIHFGVAAKDQDLK          | 2554.0             | 3            | 3.2877 | 0.1033 |
| KGDI L TLLNSTNKDWWK               | 2033.3             | 3            | 4.0455 | 0.3283 |
| KGDI VDIK                         | 888.0              | 1            | 2.3953 | 0.1583 |
| KGDKPWKESGGSVEAPR                 | 1829.0             | 2            | 3.7398 | 0.3802 |
| KGDKTNFPK                         | 1035.2             | 2            | 2.4873 | 0.1697 |
| KGDL DKAIELFQR                    | 1533.8             | 2            | 3.6608 | 0.3556 |
| KGDLLNAHYDGYLAK                   | 1678.9             | 2            | 4.8641 | 0.4911 |
| KGDLSPAELMMLTIGDVIK               | 2032.5             | 2            | 4.3861 | 0.3988 |
| KGDR TLPVR                        | 1042.2             | 2            | 2.7286 | 0.1316 |
| KGDS SAEELK                       | 1064.1             | 2            | 2.8849 | 0.2678 |
| KGDS SAEELKLATQLTGPVMPVR          | 2428.8             | 2            | 6.5036 | 0.5082 |
| KGDTAALGGK                        | 918.0              | 2            | 2.9453 | 0.2406 |
| KGDTVYILR                         | 1065.2             | 2            | 3.4059 | 0.2951 |
| KGDVAAAHTCFSGALTHCR               | 1946.2             | 2            | 3.3234 | 0.1518 |
| KGDLVLMHYTGK                      | 1386.6             | 2            | 4.8662 | 0.3793 |
| KGDVVIVLTGWRPGSGFTNTMR            | 2392.8             | 2            | 4.4258 | 0.3136 |
| KGEDFVK                           | 822.9              | 1            | 2.657  | 0.1697 |
| KGEDVLGSR                         | 1060.2             | 2            | 2.5687 | 0.1946 |
| KGEEALFTTR                        | 1152.3             | 2            | 3.2389 | 0.3092 |
| KGEFETGF EK                       | 1172.3             | 2            | 3.1714 | 0.2837 |
| KGEGLPNFDNNIK                     | 1560.7             | 2            | 3.6656 | 0.2227 |
| KGEHQILVDEKPVPIFLVPTENSIK         | 2832.3             | 3            | 4.5672 | 0.3113 |
| KGEHQILVDEKPVPIFLVPTENSIKK        | 2960.5             | 3            | 5.2496 | 0.323  |
| KGEICHL LCKPEYAYGSAGSLPK          | 2465.9             | 3            | 5.4875 | 0.4109 |
| KGEIFELK                          | 964.1              | 2            | 2.6844 | 0.1538 |

| Peptide Sequence              | Peptide mass (m/z) | Charge State | Xcorr  | DelCn2 |
|-------------------------------|--------------------|--------------|--------|--------|
| KGEITGEVHMPSGK                | 1470.7             | 2            | 3.7567 | 0.3476 |
| KGEKDIPGLDTTVPR               | 1727.9             | 2            | 5.2684 | 0.3968 |
| KGEKNTIVTSYNR                 | 1510.7             | 2            | 3.956  | 0.3695 |
| KGELTQEEKELLEVIKGTVQEAGTLLSSK | 3216.6             | 3            | 4.3999 | 0.232  |
| KGEPGPPDADGPLYLPYK            | 1915.1             | 2            | 3.6884 | 0.2366 |
| KGEQGGPPPK                    | 995.1              | 2            | 2.8564 | 0.2425 |
| KGESGQSWPR                    | 1132.2             | 2            | 3.0329 | 0.3163 |
| KGESQTDIEITR                  | 1377.5             | 2            | 3.2333 | 0.1938 |
| KGESQTDIEITREEDFTR            | 2155.3             | 3            | 3.6149 | 0.3358 |
| KGETLSQEEQR                   | 1305.4             | 2            | 2.4844 | 0.1213 |
| KGFIGPGIDVPAPDMSTGER          | 2045.3             | 2            | 5.5734 | 0.5315 |
| KGFLSGLLDNVK                  | 1291.5             | 2            | 3.338  | 0.1591 |
| KGFLSGLLDNVKQELAK             | 1861.2             | 2            | 3.1062 | 0.2128 |
| KGFNEGLWEIDNNPK               | 1761.9             | 2            | 4.2115 | 0.3176 |
| KGFNEGLWEIENNPVK              | 1932.1             | 3            | 5.0475 | 0.4465 |
| KGFPHVIYAR                    | 1188.4             | 2            | 3.0517 | 0.2845 |
| KGFSEGLWEIENNPVK              | 1949.2             | 2            | 5.3309 | 0.4131 |
| KGGDGIKPPPIIGR                | 1405.7             | 2            | 3.5167 | 0.2676 |
| KGGGALLHSVKAK                 | 1266.5             | 2            | 2.5171 | 0.1141 |
| KGGGLAGVGGGAH                 | 1038.1             | 2            | 2.4879 | 0.3014 |
| KGGKEFVEAVLELR                | 1575.8             | 2            | 5.1358 | 0.3922 |
| KGGKEFVEAVLELRK               | 1704.0             | 2            | 4.1755 | 0.2967 |
| KGGPGSTLSFVGKR                | 1391.6             | 2            | 3.4158 | 0.3824 |
| KGGPSPGDVEAIKNAIANASTLAEVER   | 2696.0             | 3            | 5.5793 | 0.4412 |
| KGGPSPGDVEAIKNAIANASTLAEVERLK | 2937.3             | 3            | 3.8846 | 0.2762 |
| KGHAVGDIPGVR                  | 1206.4             | 2            | 3.5557 | 0.4036 |
| KGHDAGDHPPITPMK               | 1601.8             | 2            | 3.4257 | 0.3655 |
| KGHEYTNK                      | 1090.2             | 2            | 2.5318 | 0.1471 |
| KGHHEAEIKPLAQSHATK            | 1983.2             | 3            | 3.5587 | 0.1862 |
| KGHYAER                       | 860.9              | 2            | 2.4663 | 0.1819 |
| KGIAFPTSISVNNCVCHFSPK         | 2363.8             | 3            | 3.646  | 0.1707 |
| KGIEESLR                      | 932.1              | 2            | 2.9698 | 0.1835 |
| KGIIRPGTAFELLEQAATGYVIDPIK    | 2873.3             | 3            | 4.467  | 0.3991 |
| KGINTLVTYDMVPEPK              | 1806.1             | 2            | 3.7922 | 0.3328 |
| KGIQEAQVELQK                  | 1371.6             | 2            | 3.6939 | 0.1846 |
| KGISDLVLKEYLDNVQLGHILER       | 2654.1             | 3            | 5.6579 | 0.4549 |

| Peptide Sequence             | Peptide mass (m/z) | Charge State | Xcorr  | DelCn2 |
|------------------------------|--------------------|--------------|--------|--------|
| KGISLNPEQWSQLK               | 1628.9             | 2            | 4.1778 | 0.3341 |
| KGISLNPEQWSQLKEQISDIDDAVR    | 2871.2             | 3            | 6.3612 | 0.4788 |
| KGIVLLEELLPK                 | 1352.7             | 2            | 4.3581 | 0.2552 |
| KGKADAGKDGNNPAK              | 1471.6             | 2            | 4.1949 | 0.2168 |
| KGKDSLYAQGK                  | 1195.4             | 2            | 3.2942 | 0.2989 |
| KGKDSLYAQGR                  | 1223.4             | 2            | 3.9612 | 0.3554 |
| KGKGDLPQLDSALQDVNDMYLLLEETEK | 3292.7             | 3            | 4.5291 | 0.2727 |
| KGKLPVNEDELVAIIAR            | 2094.4             | 2            | 5.0364 | 0.3742 |
| KGKPAAPGGAGNTGTK             | 1412.6             | 2            | 3.422  | 0.1794 |
| KGKPNIGQEQPVDDAAEVPQREPEKER  | 3046.3             | 3            | 5.2207 | 0.3121 |
| KGLDPYNVLAPK                 | 1315.5             | 2            | 4.0464 | 0.2845 |
| KGLEFPMTDLMLSPIHTPQR         | 2427.8             | 3            | 5.8267 | 0.3214 |
| KGLEQLLVGGSHLK               | 1479.7             | 2            | 4.1969 | 0.395  |
| KGLEQLLVGGSHLKENK            | 1851.1             | 2            | 4.189  | 0.3846 |
| KGLFPFTHVK                   | 1174.4             | 2            | 3.0217 | 0.1107 |
| KGLIAAICAGPTALLAHEIGFGSK     | 2339.8             | 3            | 7.696  | 0.5913 |
| KGLKEGIPALDNFLDKL            | 1872.2             | 3            | 5.2614 | 0.356  |
| KLLGELILLQQIQEHEEEAR         | 2575.9             | 3            | 3.5433 | 0.176  |
| KGLPLGSAVSSPVLFSPVGR         | 1969.3             | 2            | 4.6625 | 0.4914 |
| KGLSFFAFEHSEEYQQAQHK         | 2412.6             | 3            | 3.409  | 0.1887 |
| KGLTPSQIGVILR                | 1382.7             | 3            | 4.7805 | 0.3122 |
| KGLVGPELHDR                  | 1221.4             | 3            | 3.5002 | 0.3491 |
| KGLYMANDLK                   | 1153.4             | 2            | 2.6769 | 0.177  |
| KGMWSENGSHTIR                | 1560.7             | 2            | 3.2036 | 0.2995 |
| KGNEQHAFTR                   | 1188.3             | 2            | 3.3944 | 0.3593 |
| KGNFNIEFTR                   | 1389.5             | 2            | 3.2625 | 0.1008 |
| KGNFYIFDVLQDGNIVSPSEIQAHLK   | 3049.4             | 3            | 5.719  | 0.3594 |
| KGNIELASSEPHFTTTVTR          | 2217.4             | 3            | 4.2403 | 0.419  |
| KGNKEDYDLSK                  | 1297.4             | 2            | 3.5933 | 0.296  |
| KGNNESYHYAR                  | 1339.4             | 2            | 3.3839 | 0.362  |
| KGNYAER                      | 837.9              | 2            | 2.6803 | 0.2285 |
| KGNYSER                      | 853.9              | 2            | 2.439  | 0.2184 |
| KGPAAPPPTPVKPPR              | 1510.8             | 3            | 3.7162 | 0.3362 |
| KGPAPELQGVVALAPEELELDPMAMTQK | 3093.6             | 3            | 3.4377 | 0.267  |
| KGPEDTAQLAHAVLAK             | 1649.9             | 3            | 4.7733 | 0.2987 |
| KGPEFTKDFAPVIVEAFK           | 2024.3             | 2            | 3.3923 | 0.3376 |

| Peptide Sequence                       | Peptide mass (m/z) | Charge State | Xcorr  | DelCn2 |
|----------------------------------------|--------------------|--------------|--------|--------|
| KGPELPLVPVKR                           | 1333.6             | 2            | 2.6633 | 0.1304 |
| KGPGLAVQSGDKTK                         | 1386.6             | 2            | 3.5523 | 0.2774 |
| KGPGLYYVDEHGTR                         | 1592.7             | 2            | 4.1009 | 0.4323 |
| KGPGPGGGVSGGK                          | 1055.2             | 2            | 2.5165 | 0.2525 |
| KGPQGYGFNLHSDK                         | 1548.7             | 2            | 4.3429 | 0.3639 |
| KGPQVRDWSHYFKIIEDLRAQIFANTVDNAR        | 3690.1             | 3            | 3.4013 | 0.2707 |
| KGPSGYGFNLHSDK                         | 1507.6             | 2            | 4.4177 | 0.3755 |
| KGPSSTGASGQAK                          | 1176.3             | 2            | 2.5829 | 0.193  |
| KGPSTVTDLEDTKR                         | 1547.7             | 2            | 3.8926 | 0.3876 |
| KGQAVDYEGSR                            | 1210.3             | 2            | 3.623  | 0.3232 |
| KGQAVDYEGSRTQEEIVAK                    | 2109.3             | 3            | 4.46   | 0.4382 |
| KGQDSIEPVPGQK                          | 1383.5             | 2            | 3.3701 | 0.2255 |
| KGQGGAGAGDDEEED                        | 1435.3             | 2            | 4.0228 | 0.2767 |
| KGQGLTGPTLLPGTPARK                     | 1793.1             | 2            | 3.0693 | 0.2655 |
| KGQGTAAATGNQATPK                       | 1430.5             | 2            | 3.5984 | 0.3119 |
| KGQSEEIQK                              | 1047.1             | 2            | 2.5312 | 0.1083 |
| KGQHTLTLEDFQR                          | 1460.6             | 2            | 3.9833 | 0.4779 |
| KGRDTLQEANDILNNLKDFDR                  | 2476.7             | 3            | 3.593  | 0.118  |
| KGRPMVISSGMQSMQMDTMK                   | 1985.4             | 2            | 3.9325 | 0.4128 |
| KGSEHQAIVQHLEK                         | 1604.8             | 2            | 3.2206 | 0.2758 |
| KGSEQESVKEFLAK                         | 1580.8             | 2            | 4.0265 | 0.3405 |
| KGSEVESVKEFLAK                         | 1551.8             | 2            | 4.4942 | 0.3502 |
| KGSITSVQAIYVPADDLTDPAATTF AHL DATTVLSR | 3845.3             | 3            | 7.5102 | 0.5905 |
| KGSLESPATDVFVGSTEEGEKR                 | 2225.4             | 3            | 5.4775 | 0.4418 |
| KGSLIDSSTIDPAVSK                       | 1732.0             | 2            | 3.2374 | 0.3872 |
| KGSLIDSSTIDPAVSKELAK                   | 2173.5             | 3            | 4.5099 | 0.3929 |
| KGSLIDSSTIDPAVSKELAKEVEK               | 2659.0             | 3            | 5.6721 | 0.5016 |
| KGSVPLGLATVLQDLLR                      | 1781.1             | 2            | 4.1219 | 0.4492 |
| KGSVSHDTVQPR                           | 1311.4             | 2            | 2.4578 | 0.1329 |
| KGSYNPVTTHIYTAQDVK                     | 1922.1             | 2            | 4.2228 | 0.3709 |
| KGSYNPVTTHIYTAQDVKEVIEYAR              | 2783.1             | 3            | 4.7267 | 0.3792 |
| KGTAVFWYNLLR                           | 1468.7             | 2            | 3.104  | 0.244  |
| KGTDDSMTLQSQK                          | 1439.6             | 2            | 4.1925 | 0.2895 |
| KGTDLWLGVDALGLNIYEKDDKLTPK             | 2904.3             | 3            | 4.7764 | 0.3521 |
| KGTDVPKWISIMTER                        | 1762.1             | 3            | 5.0847 | 0.3852 |
| KGTEVQVDDIKR                           | 1388.6             | 3            | 3.6109 | 0.2085 |

| Peptide Sequence                         | Peptide mass (m/z) | Charge State | Xcorr  | DelCn2 |
|------------------------------------------|--------------------|--------------|--------|--------|
| KGTVEGFEPADNK                            | 1392.5             | 2            | 3.6735 | 0.2661 |
| KGTVLLADNVICPGAPDFLAHVR                  | 2407.8             | 2            | 4.5329 | 0.4813 |
| KGTVVYGEPIASLGTGSHYWSK                   | 2554.8             | 3            | 3.4889 | 0.3228 |
| KGVAINFVTEEDKR                           | 1606.8             | 2            | 4.212  | 0.443  |
| KGVAINMVTEEDKR                           | 1590.8             | 2            | 4.0845 | 0.3778 |
| KGVEFPMADLDALSPIHTPQR                    | 2323.7             | 3            | 5.7153 | 0.3786 |
| KGVEGLIDIENPNR                           | 1554.7             | 2            | 4.1648 | 0.3155 |
| KGVEHGPAAIR                              | 1135.3             | 2            | 2.4088 | 0.208  |
| KGVITVKDGK                               | 1045.3             | 2            | 3.4307 | 0.1916 |
| KGVLETFSGTETNKIWPYVYAFLQTK               | 3022.4             | 3            | 4.8131 | 0.2104 |
| KGVLFGVPGAFTPGCSK                        | 1666.0             | 2            | 4.4464 | 0.4066 |
| KGVNLPGAAVDLPAVSEK                       | 1766.0             | 2            | 5.1839 | 0.4688 |
| KGVNLPGAAVDLPAVSEKDIQDLK                 | 2478.8             | 3            | 6.5406 | 0.4939 |
| KGVNLPGAAVDLPAVSEKDIQDLKFGVEQDVMVFASFIR  | 4320.9             | 3            | 7.341  | 0.5689 |
| KGVNLPGAAVDLPAVSEKDIQDLKFGVEQDVMVFASFIRK | 4449.1             | 3            | 5.6399 | 0.4625 |
| KGVQLQTHPNVDKK                           | 1592.8             | 2            | 3.2378 | 0.2356 |
| KGVTSILPVLR                              | 1183.5             | 2            | 3.4691 | 0.2358 |
| KGVVKAEK                                 | 859.0              | 1            | 2.7512 | 0.1827 |
| KGWALLHPGR                               | 1135.3             | 2            | 2.5455 | 0.1807 |
| KGWLSLHTGNLDGEDHAAER                     | 2207.3             | 3            | 4.3035 | 0.3549 |
| KGYEEVHVPALKPKPFGSEEQLLPVEK              | 3050.5             | 3            | 5.1598 | 0.3572 |
| KGYEEVHVPALKPKPFGSEEQLLPVEKLPK           | 3388.9             | 3            | 4.4944 | 0.3334 |
| KGYEVIYLTEPVDEYCIQALPEFDGKR              | 3177.6             | 3            | 6.6202 | 0.4921 |
| KGYPEVALHFKDEK                           | 1761.0             | 2            | 3.2825 | 0.2069 |
| KHAASDVDLEIESLLNQQSTK                    | 2327.5             | 2            | 3.4873 | 0.3553 |
| KHAASDVDLEIESLLNQQSTKEQQSK               | 2928.2             | 3            | 3.5096 | 0.1875 |
| KHALFPELPK                               | 1180.4             | 2            | 2.6131 | 0.2103 |
| KHALLEADVAAHQDR                          | 1674.8             | 2            | 4.6947 | 0.4747 |
| KHDSGAADLER                              | 1199.3             | 2            | 2.6572 | 0.2755 |
| KHEAFESDLAAHQDR                          | 1754.8             | 2            | 5.5888 | 0.5272 |
| KHEAFESDLAAHQDRVEQIAAIAQELNELDYYDSHNVNTR | 4642.9             | 3            | 5.0275 | 0.4235 |
| KHEAFESDLAAHQDRVEQIAAIAQELNELDYYDSPSVNAR | 4545.8             | 3            | 3.898  | 0.3527 |
| KHEAFETDFTVHK                            | 1589.7             | 2            | 3.6103 | 0.3459 |
| KHEAFETDFTVHKDR                          | 1861.0             | 2            | 5.6075 | 0.4825 |
| KHEAIETDIAAYEER                          | 1775.9             | 3            | 5.3072 | 0.414  |
| KHEALMSDLSAYGSSIQALR                     | 2178.5             | 2            | 4.5559 | 0.4718 |



| Peptide Sequence                        | Peptide mass (m/z) | Charge State | Xcorr  | DelCn2 |
|-----------------------------------------|--------------------|--------------|--------|--------|
| KHEDFDKAINVQEEK                         | 1831.0             | 2            | 4.525  | 0.3221 |
| KHEEEEAKAER                             | 1356.4             | 2            | 3.432  | 0.3506 |
| KHEGFER                                 | 903.0              | 1            | 2.0162 | 0.1167 |
| KHEGFERDLAALGDKVNSLGETAER               | 2744.0             | 3            | 4.5254 | 0.3969 |
| KHELLEEAR                               | 1125.3             | 2            | 2.6834 | 0.1409 |
| KHFPSVNWLISSK                           | 1707.0             | 3            | 4.5686 | 0.2058 |
| KHFVCEGCEQLLSGR                         | 1707.0             | 2            | 3.7373 | 0.179  |
| KHFVGYPTNSDFELK                         | 1783.0             | 2            | 3.952  | 0.4164 |
| KHGGPKDEER                              | 1153.2             | 2            | 2.8469 | 0.1868 |
| KHGLEVIYMIPIDEYCVQQLK                   | 2650.1             | 2            | 3.9717 | 0.3606 |
| KHGTEEQKATYLPQLTTEK                     | 2203.4             | 3            | 3.9475 | 0.3803 |
| KHGVNVQSIADIHPIQVQPGR                   | 2294.6             | 2            | 5.2128 | 0.3723 |
| KHGVVPLATYMR                            | 1372.7             | 3            | 3.6201 | 0.16   |
| KHIEDEKLVR                              | 1267.5             | 2            | 2.8448 | 0.1495 |
| KHIMGQNVADYMR                           | 1563.8             | 2            | 3.0781 | 0.3479 |
| KHINTWVAEK                              | 1226.4             | 3            | 3.4595 | 0.1651 |
| KHIQDAPEEFISELAEYLIKPLNK                | 2827.2             | 3            | 3.8428 | 0.2758 |
| KHISQISVAEDDDDESLLGHLMIVGK              | 2736.1             | 3            | 7.3826 | 0.5191 |
| KHISQISVAEDDDDESLLGHLMIVGKK             | 2864.3             | 3            | 5.82   | 0.3896 |
| KHISQISVAEDDDDESLLGHLMIVGKKCAADLGLNKGYS | 4126.7             | 3            | 3.765  | 0.1378 |
| KHKDVAEEIANRPTLDLTHEQASALPQEHAESPDR     | 4197.5             | 3            | 3.8416 | 0.2162 |
| KHLEINPDHPIVETLR                        | 1912.2             | 2            | 5.5003 | 0.3651 |
| KHLEINPDHSIETLR                         | 1916.2             | 2            | 5.3418 | 0.4457 |
| KHLEINPNHPIVEMLQ                        | 1913.2             | 2            | 4.5836 | 0.265  |
| KHLHSGQEAASPGPAPSLAPGAVVPTSVIAR         | 3004.4             | 3            | 5.0031 | 0.2908 |
| KHLTSMATSYFGK                           | 1471.7             | 2            | 3.459  | 0.3852 |
| KHLVESTNEMAPLKVVQLQDLSFQTAAR            | 3242.7             | 3            | 5.8244 | 0.433  |
| KHNLGINNNILQPVDSK                       | 2019.3             | 3            | 3.822  | 0.3131 |
| KHPDADSLYVEEVDVGEIAPR                   | 2340.5             | 2            | 5.7858 | 0.4961 |
| KHPDASVNFSEFSK                          | 1593.7             | 2            | 4.4947 | 0.4173 |
| KHPDASVNFSEFSKK                         | 1721.9             | 2            | 2.9385 | 0.1914 |
| KHPDSSVNFSEFSKK                         | 1721.9             | 2            | 4.2821 | 0.2115 |
| KHPEVDVLINFAASLR                        | 1739.0             | 3            | 5.282  | 0.472  |
| KHPGGGESDASPEAGSGGGGVALKK               | 2251.4             | 3            | 4.4043 | 0.3073 |
| KHPSSPECLVSAQK                          | 1511.7             | 2            | 3.3153 | 0.2724 |
| KHQILEQAVEDYAETVHQLSK                   | 2467.7             | 3            | 4.6039 | 0.4613 |

| Peptide Sequence                 | Peptide mass (m/z) | Charge State | Xcorr  | DelCn2 |
|----------------------------------|--------------------|--------------|--------|--------|
| KHQQLLEEK                        | 1153.3             | 2            | 2.8209 | 0.1038 |
| KHQQLLEEKNILAEQLQAETELFAEAEEMR   | 3571.0             | 3            | 4.5545 | 0.356  |
| KHSAILASPNPDEK                   | 1507.7             | 2            | 4.0961 | 0.3263 |
| KHSAILASPNPDEKTKEELEELMSDIKK     | 3182.6             | 3            | 3.294  | 0.2217 |
| KHSELSELVK                       | 1284.4             | 2            | 2.8361 | 0.2648 |
| KHSGFEDELSEVLENQSSQAELK          | 2605.8             | 3            | 4.8546 | 0.4051 |
| KHSGFEDELSEVLENQSSQAELKEAVEEPSSK | 3562.8             | 3            | 5.5261 | 0.196  |
| KHSLPDLPYDYGALPHINAQIMQLHHSK     | 3354.8             | 3            | 5.8869 | 0.486  |
| KHSQFIGYPITLFVEK                 | 1908.2             | 3            | 4.9314 | 0.4138 |
| KHSQFIGYPITLFVEKER               | 2193.5             | 3            | 4.559  | 0.4375 |
| KHSQFIGYPITLYLEK                 | 1938.3             | 3            | 5.1958 | 0.4704 |
| KHSQFLGYPTLYLEK                  | 1938.3             | 3            | 5.0496 | 0.3846 |
| KHTLSFVDVGTGK                    | 1389.6             | 2            | 3.1312 | 0.3246 |
| KHTLSYVDVGTGK                    | 1405.6             | 2            | 4.0114 | 0.2866 |
| KHVNPVQALSEFK                    | 1497.7             | 2            | 3.0125 | 0.246  |
| KHVTTAEGTPGTTDQEGPPDPGPEKR       | 2801.0             | 3            | 3.6855 | 0.2124 |
| KHYGYSLSAIK                      | 1430.6             | 2            | 2.8906 | 0.1491 |
| KIADDKYNDTFWK                    | 1644.8             | 2            | 3.3787 | 0.2995 |
| KIADDKYNDTFWKEFGTNIK             | 2434.7             | 3            | 5.0128 | 0.432  |
| KIAEKDDDLKR                      | 1331.5             | 2            | 3.6808 | 0.1589 |
| KIAEEEEQSQGSTTNSDWMK             | 2412.6             | 3            | 5.2824 | 0.3893 |
| KIAELMPGASGAEVK                  | 1501.8             | 2            | 4.4305 | 0.3204 |
| KIAILHENFTTVKPEDAYEDFIVKPPVR     | 3271.8             | 3            | 5.3924 | 0.4122 |
| KIAILHENFTTVKPEDAYEDFIVKPPVRK    | 3399.9             | 3            | 4.0233 | 0.3564 |
| KIANLLKPDKEIVQGDHMIIR            | 2548.0             | 3            | 7.8363 | 0.508  |
| KIAQNDHDLGDMSTVADPSVISHLFSHR     | 3092.4             | 3            | 4.3698 | 0.1726 |
| KIASLSRPVSLGK                    | 1455.8             | 2            | 3.6419 | 0.2593 |
| KIATEKDFLEAVNK                   | 1606.8             | 2            | 4.3848 | 0.3431 |
| KICALDDNVCMAGLTADAR              | 2199.6             | 2            | 4.0013 | 0.3144 |
| KIDASKSVDEVFDEVVQIFDKEG          | 2598.8             | 3            | 3.4326 | 0.3182 |
| KIDASQTEFEK                      | 1296.4             | 2            | 3.4366 | 0.2621 |
| KIDASQTEFEKNVWSFLK               | 2171.4             | 2            | 4.4422 | 0.431  |
| KIDLSHVTSK                       | 1128.3             | 2            | 3.2288 | 0.3246 |
| KIDQEGKIPDETLEK                  | 1743.9             | 2            | 5.2423 | 0.3802 |
| KIDQEGKIPDETLEKLGK               | 1985.3             | 2            | 4.8503 | 0.3181 |
| KIDTHSPSPHSSTVK                  | 1621.8             | 2            | 2.7835 | 0.1337 |

| Peptide Sequence            | Peptide mass (m/z) | Charge State | Xcorr  | DelCn2 |
|-----------------------------|--------------------|--------------|--------|--------|
| KIDTHPSPSHSSTVKDSLIELK      | 2420.7             | 3            | 4.639  | 0.3077 |
| KIEAEIVR                    | 958.1              | 2            | 2.4247 | 0.1613 |
| KIEALLNLPR                  | 1167.4             | 2            | 3.0457 | 0.1307 |
| KIEDLGAAMEEALILDNK          | 1974.3             | 2            | 5.8208 | 0.3795 |
| KIEDNNTLVFIVDVK             | 1748.0             | 2            | 3.9499 | 0.3104 |
| KIEEAMDGSETPQLFTVLPEKR      | 2519.9             | 3            | 4.204  | 0.3592 |
| KIEEIKDFLLTAR               | 1576.9             | 2            | 5.0534 | 0.3632 |
| KIEEQLTLEK                  | 1231.4             | 2            | 3.8102 | 0.2041 |
| KIEEVRDAMENEMR              | 1751.0             | 2            | 3.3241 | 0.2496 |
| KIEFPMPNEEAR                | 1461.7             | 2            | 2.8478 | 0.2798 |
| KIEFPPPNEEARLDILK           | 2010.3             | 2            | 3.9546 | 0.2114 |
| KIEFSLPDLEGR                | 1404.6             | 2            | 3.8307 | 0.2477 |
| KIEFSLPDLEGRTHIFK           | 2031.3             | 2            | 2.6701 | 0.2787 |
| KIEFVVVGPEAPLAAGIVGNLR      | 2250.7             | 3            | 3.514  | 0.2907 |
| KIEGKDEKNDNGASGQTSESIKK     | 2464.6             | 3            | 3.3489 | 0.194  |
| KIEIDNGDELTAFLYEEVHPK       | 2576.8             | 3            | 5.5128 | 0.3953 |
| KIEIGDGAELTAEFLYDEVHPK      | 2475.7             | 3            | 6.4808 | 0.4633 |
| KIEISQHAK                   | 1054.2             | 2            | 3.036  | 0.2088 |
| KIENIHIGEK                  | 1181.4             | 2            | 3.1311 | 0.2359 |
| KIENLEALTELEILDISFNLLR      | 2588.0             | 2            | 4.1099 | 0.4121 |
| KIENVPTGPNNKPK              | 1536.8             | 2            | 3.5226 | 0.2356 |
| KIEPELDGSAQVTSHDASTNGLINFIK | 2886.2             | 3            | 6.4805 | 0.5407 |
| KIEQELTAAK                  | 1131.3             | 2            | 3.3436 | 0.1606 |
| KIEQELTAAKK                 | 1259.5             | 2            | 3.7764 | 0.1864 |
| KIEQVDKEDEITEK              | 1704.9             | 2            | 5.1299 | 0.266  |
| KIESFGSK                    | 896.0              | 1            | 2.2221 | 0.1889 |
| KIETEVAGLK                  | 1088.3             | 2            | 2.4536 | 0.1017 |
| KIETFLNHYPVESSWIAPELR       | 2530.9             | 3            | 5.2318 | 0.4199 |
| KIETRDGKLVSESSDVLPK         | 2102.4             | 3            | 4.7893 | 0.3394 |
| KIEVIKPGDLGVDLTSK           | 1813.1             | 2            | 4.5679 | 0.3552 |
| KIFDIDEAEEGVKDLK            | 1850.1             | 2            | 4.6636 | 0.2575 |
| KIFDLQDWTQEDERDKDAAK        | 2452.6             | 3            | 4.5377 | 0.3143 |
| KIFEYETQR                   | 1214.4             | 2            | 2.4283 | 0.2154 |
| KIFLAQKPAPLLESPFKDR         | 2199.6             | 3            | 4.2421 | 0.2692 |
| KIFRDEGGK                   | 1050.2             | 2            | 2.4544 | 0.1781 |
| KIFVGGIKEDTEEHHLR           | 2009.3             | 3            | 6.1296 | 0.405  |

| Peptide Sequence                     | Peptide mass (m/z) | Charge State | Xcorr  | DelCn2 |
|--------------------------------------|--------------------|--------------|--------|--------|
| KIFVGGIKEDTEEHHLRDYFEQYGK            | 3040.3             | 3            | 4.1219 | 0.1704 |
| KIFVGGIKEDTEEYNLR                    | 2012.3             | 3            | 5.3615 | 0.3739 |
| KIFVGGIKEDTEEYNLRDYFEK               | 2695.0             | 3            | 4.7549 | 0.3701 |
| KIFVGGIKEDTEEYNLRDYFEKYGK            | 3043.4             | 3            | 5.3767 | 0.1894 |
| KIFVGTK                              | 793.0              | 1            | 2.5784 | 0.1137 |
| KIGDEYFTFITDCKDPK                    | 2021.3             | 2            | 3.5024 | 0.3395 |
| KIGDEYFTFITDCKDPKACTILLR             | 2792.3             | 3            | 3.5606 | 0.1128 |
| KIGDSSVETHR                          | 1229.3             | 2            | 2.6696 | 0.2449 |
| KIGEEEIQKPEEK                        | 1557.7             | 2            | 4.204  | 0.2184 |
| KIGGIFAFK                            | 981.2              | 2            | 2.6594 | 0.2518 |
| KIGILHENFQTLK                        | 1541.8             | 2            | 3.3913 | 0.2239 |
| KIGLDDEEKLDLFR                       | 1691.9             | 2            | 4.6044 | 0.4601 |
| KIGLETVGVK                           | 1044.3             | 2            | 2.4288 | 0.1737 |
| KIGTTPDIILDDLLETDRVTAHF              | 2584.9             | 3            | 4.8856 | 0.332  |
| KIGYNPATVPFVPISGWHGDNMLEPSNPWFK      | 3729.3             | 3            | 3.7319 | 0.3014 |
| KIGYNPDTVAFVPISGWNGDNMLEPSANMPWFK    | 3698.2             | 3            | 5.7717 | 0.21   |
| KIGYNPDTVAFVPISGWNGDNMLEPSANMPWFKGWK | 4069.6             | 3            | 5.368  | 0.1946 |
| KIHEQGILAILDVEPQALK                  | 2116.5             | 2            | 3.6534 | 0.3633 |
| KIHESAGLPFFEIVDAPLNICESR             | 2834.2             | 3            | 5.2033 | 0.3793 |
| KIHIDLPNEQAR                         | 1434.6             | 2            | 4.3683 | 0.3305 |
| KIHLFDIDVPGK                         | 1382.6             | 2            | 4.9338 | 0.4367 |
| KIHLFDIDVPGKITFQESK                  | 2216.6             | 2            | 4.7435 | 0.4258 |
| KIHPQTIAGWR                          | 1420.7             | 3            | 4.1842 | 0.1139 |
| KIHSQEEALR                           | 1211.4             | 2            | 3.1887 | 0.2949 |
| KIHTEPQLSAALEYVR                     | 1856.1             | 3            | 5.0969 | 0.426  |
| KIHVTPLIPGK                          | 1203.5             | 2            | 2.4023 | 0.1951 |
| KIIAKGEEELLSPLNLEQAAYAR              | 2428.8             | 3            | 4.8708 | 0.3656 |
| KIIENGENEKTVS                        | 1461.6             | 2            | 2.7879 | 0.1857 |
| KIIFHSGPTNSGK                        | 1386.6             | 2            | 3.172  | 0.1536 |
| KIIKDGEQHEDLNEVAK                    | 1967.2             | 2            | 5.0625 | 0.3586 |
| KIIKDGEQHEDLNEVAKLFNIHED             | 2836.1             | 3            | 5.1741 | 0.487  |
| KIIKEESDSFKENVKPIKVEVK               | 2589.0             | 3            | 5.374  | 0.3353 |
| KIILWDHDLNPER                        | 1649.9             | 2            | 3.4239 | 0.3423 |
| KIIPTLEEQHYK                         | 1662.9             | 3            | 3.3232 | 0.2466 |
| KIITSEAQELGDTTTLLEDPSIIAEILSVYQK     | 3407.8             | 3            | 3.9945 | 0.1285 |
| KIKAAVEDPRVLLLDL                     | 1794.2             | 2            | 2.9198 | 0.1596 |

| Peptide Sequence                           | Peptide mass (m/z) | Charge State | Xcorr  | DelCn2 |
|--------------------------------------------|--------------------|--------------|--------|--------|
| KIKDPDASKPEDWDER                           | 1930.1             | 2            | 3.9789 | 0.374  |
| KIKDRLPLAVVGSNTIIEVNGK                     | 2365.8             | 3            | 3.9243 | 0.2735 |
| KIKEGVVEEAAK                               | 1202.4             | 2            | 3.5162 | 0.2063 |
| KIKETVDQVEELRR                             | 1744.0             | 2            | 4.1993 | 0.1969 |
| KIKGEHPGLSIGDVAK                           | 1649.9             | 2            | 4.5958 | 0.3798 |
| KIKVDEFVTHNLSFDEINK                        | 2277.6             | 2            | 6.19   | 0.5117 |
| KIKVDEFVTHNLSFDEINKAFELMHSGK               | 3278.7             | 3            | 6.1322 | 0.4495 |
| KILAIELLENLK                               | 1284.6             | 2            | 3.929  | 0.203  |
| KILATPPQEDAPSVDIANIR                       | 2149.4             | 3            | 4.9913 | 0.5159 |
| KILCEELGAPANSVNCVPLEDFGGHHPDPNLTYAADLVETMK | 4582.2             | 3            | 4.1459 | 0.3045 |
| KILDPNTEGEPAPVLSSPPPADVSTFLAFPSPEK         | 3420.9             | 3            | 4.6237 | 0.3684 |
| KILDSVGIEADDDRLNK                          | 1902.1             | 2            | 5.3296 | 0.3893 |
| KILDSVGIEADDDRLNKVISELNGK                  | 2743.1             | 3            | 5.1742 | 0.353  |
| KILDSVGIEADDDRLNKVISELNGKNIEDVIAQGIGK      | 3981.5             | 3            | 6.2869 | 0.4039 |
| KILEEENSLAEYHSR                            | 1819.0             | 3            | 3.2476 | 0.2581 |
| KILEVHIDK                                  | 1095.3             | 2            | 2.6983 | 0.1679 |
| KILGYINTGKQEGAK                            | 1620.9             | 2            | 4.2141 | 0.3104 |
| KILHVDNHIGISIAGLTADAR                      | 2215.5             | 3            | 4.0552 | 0.329  |
| KILIWSGR                                   | 973.2              | 2            | 2.5232 | 0.1548 |
| KILNDLSSDAPGVPR                            | 1582.8             | 2            | 2.8895 | 0.2518 |
| KILQDGGGLQVVEK                             | 1427.7             | 2            | 3.3223 | 0.2353 |
| KILSHTEEHK                                 | 1222.4             | 2            | 2.8518 | 0.1191 |
| KILTPIIFKEENLR                             | 1715.1             | 3            | 3.2827 | 0.2109 |
| KINELTGIKESDTGLAPPALWDLAADKQTLQSEQPLQVAR   | 4347.9             | 3            | 5.5775 | 0.2628 |
| KINQLISETAVVTNELEDGDRQK                    | 2731.0             | 3            | 4.5656 | 0.3077 |
| KINSQNQPTGIHREPPPPFVSVK                    | 2684.0             | 3            | 4.1632 | 0.1874 |
| KIPAVPNGTAAHGEAEPHGGHSGPELQR               | 2816.0             | 3            | 4.4965 | 0.4129 |
| KIPGIYVLSLEIGK                             | 1530.9             | 2            | 3.1743 | 0.3393 |
| KIPIVSSLADPLDTPPDSK                        | 1994.3             | 2            | 2.4364 | 0.1048 |
| KIPLVPENLLK                                | 1264.6             | 2            | 2.5502 | 0.1697 |
| KIPNPdffEDLEPFR                            | 1865.1             | 2            | 4.9047 | 0.4792 |
| KIPSVEDSLGEGSR                             | 1474.6             | 2            | 3.0121 | 0.166  |
| KIQALQQQAEDAEDR                            | 1743.9             | 2            | 5.7534 | 0.494  |
| KIQALQQQAEDAEDRAQGLQR                      | 2397.6             | 2            | 4.644  | 0.394  |
| KIQASTMAFK                                 | 1125.4             | 2            | 2.9024 | 0.2016 |
| KIQFTVPLLEPHLDPEAAEQIR                     | 2545.9             | 2            | 6.0089 | 0.4258 |

| Peptide Sequence                           | Peptide mass (m/z) | Charge State | Xcorr  | DelCn2 |
|--------------------------------------------|--------------------|--------------|--------|--------|
| KIQFTVPLLEPHLDPEAAEQIRR                    | 2702.1             | 3            | 4.8135 | 0.3429 |
| KIQGIEEYKK                                 | 1236.4             | 3            | 3.7274 | 0.2224 |
| KIQMSNLMNQAR                               | 1434.7             | 2            | 3.0459 | 0.1373 |
| KIQNDAGVR                                  | 1001.1             | 2            | 2.6706 | 0.13   |
| KIQQGLFDVHNEANGIK                          | 1912.1             | 3            | 4.7531 | 0.3216 |
| KIQQNTFTR                                  | 1136.3             | 2            | 2.672  | 0.1861 |
| KIQTTTTTQAVQGR                             | 1533.7             | 2            | 3.6226 | 0.3592 |
| KIQVLQQQADDAEER                            | 1771.9             | 2            | 5.1477 | 0.3897 |
| KIQVLQQQADDAEERAER                         | 2128.3             | 2            | 4.6329 | 0.3028 |
| KIREESNTK                                  | 1105.2             | 2            | 3.1006 | 0.2489 |
| KIRELESQISELQEDLESER                       | 2432.6             | 2            | 2.6707 | 0.3105 |
| KISASLQSQSPEHLLPVLIIQAAQLCR                | 2832.3             | 3            | 4.9366 | 0.3473 |
| KISEIEDAAFLAR                              | 1463.7             | 2            | 3.3511 | 0.1844 |
| KISELDAFLK                                 | 1164.4             | 2            | 2.8448 | 0.1977 |
| KISELDAFLKEPALNEANLSNLK                    | 2558.9             | 3            | 7.6065 | 0.5005 |
| KISELDAFLKEPALNEANLSNLKAPLDIPVPDPVK        | 3801.4             | 3            | 3.6589 | 0.1856 |
| KISELDAFLKEPALNEANLSNLKAPLDIPVPDPVKEK      | 4058.7             | 3            | 5.8506 | 0.4211 |
| KISELDAFLKEPALNEANLSNLKAPLDIPVPDPVKEKEKEER | 4730.4             | 3            | 4.4595 | 0.2874 |
| KISENSYSLDDLEIGPGQLSSSTFDSEKNESR           | 3534.7             | 3            | 5.905  | 0.4268 |
| KISGTTALQEALKEK                            | 1617.9             | 2            | 4.3282 | 0.1511 |
| KISIPVDISDSMMLNIINSSITTK                   | 2737.2             | 3            | 4.4453 | 0.2509 |
| KISKPDLKPFTPEVR                            | 1756.1             | 2            | 4.131  | 0.2568 |
| KISNQFDWALMR                               | 1509.8             | 2            | 4.0626 | 0.3709 |
| KISSDLDGHPVPK                              | 1393.6             | 2            | 4.3087 | 0.4185 |
| KISSIQSIVPALEIANAHR                        | 2048.4             | 3            | 6.4923 | 0.52   |
| KISSPTGSKDLQMVNISLR                        | 2075.4             | 3            | 4.8215 | 0.3721 |
| KISVVSATK                                  | 933.1              | 2            | 2.6072 | 0.1006 |
| KITAASK                                    | 718.9              | 1            | 1.9673 | 0.1383 |
| KITESVAETAQTIK                             | 1519.7             | 2            | 4.7125 | 0.4003 |
| KITESVAETAQTIKK                            | 1647.9             | 2            | 4.9617 | 0.4728 |
| KITHNPFPGPGQFFDLSIR                        | 2075.4             | 2            | 5.2035 | 0.4817 |
| KITIADCGQLE                                | 1191.4             | 2            | 2.9586 | 0.2573 |
| KITIKNDPSLPEPK                             | 1580.9             | 2            | 3.5109 | 0.2619 |
| KIVDQNTK                                   | 946.1              | 1            | 2.6073 | 0.177  |
| KIVEGISQPIWLVSDTR                          | 1942.2             | 2            | 4.4992 | 0.4982 |
| KIVNSAQTGSFK                               | 1280.5             | 2            | 3.3642 | 0.2892 |

| Peptide Sequence                 | Peptide mass (m/z) | Charge State | Xcorr  | DelCn2 |
|----------------------------------|--------------------|--------------|--------|--------|
| KIWCFGPDGTGPNILTDITK             | 2177.5             | 2            | 5.6084 | 0.5232 |
| KIYCVACQELDSDVDKDNPALNAQAALSQAR  | 3351.7             | 3            | 6.8066 | 0.5046 |
| KIYEDGDDDMKR                     | 1485.6             | 2            | 4.0454 | 0.3548 |
| KIYQNIQDGSLLDLNAAESGVQHKPSAPQGGR | 3280.6             | 3            | 5.8671 | 0.4088 |
| KIYSFTLKPR                       | 1253.5             | 2            | 2.7952 | 0.3129 |
| KKAAAQLLQSQAQQSGAQQTK            | 2214.5             | 3            | 5.1749 | 0.3032 |
| KKADLHDEEDEQDILLAQDLEDMWEQK      | 3286.5             | 3            | 4.9761 | 0.366  |
| KKAEAEAEAKPK                     | 1358.5             | 2            | 3.7454 | 0.2431 |
| KKAEPSVDMNSPK                    | 1560.8             | 2            | 3.6938 | 0.329  |
| KKAESFAQEMFIEQNK                 | 1929.2             | 2            | 5.7422 | 0.3921 |
| KKAQAEELASFK                     | 1221.4             | 2            | 2.5308 | 0.1352 |
| KKASLVALPEQTASEEETPPPLLTK        | 2679.1             | 3            | 5.2963 | 0.381  |
| KKATGSPVSIFVYDVKPGAEEQTQVAK      | 2879.3             | 3            | 4.0841 | 0.1718 |
| KKAVLFCLSEDKK                    | 1509.8             | 2            | 4.4814 | 0.3283 |
| KKAYADFYR                        | 1162.3             | 2            | 2.7788 | 0.1994 |
| KKDAGAGTEAESLKGNAEAQPLGPEAK      | 2668.9             | 3            | 4.8457 | 0.3219 |
| KKDALLSALSIGNYHLECNETK           | 2519.9             | 3            | 5.1315 | 0.2927 |
| KKDASDDLDDLNFFNQK                | 2014.1             | 2            | 5.6369 | 0.4175 |
| KKDAVLTK                         | 903.1              | 2            | 3.4663 | 0.1496 |
| KKDDDDDEEIGGPKEELIPEK            | 2285.4             | 3            | 4.1501 | 0.2855 |
| KKDDIPEEDKGNVK                   | 1615.8             | 2            | 3.412  | 0.1786 |
| KKDDRIEELEEALR                   | 1744.9             | 2            | 3.728  | 0.2345 |
| KKDEELSSALEK                     | 1377.5             | 2            | 4.1633 | 0.2386 |
| KKDEISVDSLDFNKK                  | 1767.0             | 2            | 5.6533 | 0.4412 |
| KKDESEQGKQQYLQSIER               | 2324.5             | 2            | 5.4685 | 0.3882 |
| KKDFDTALK                        | 1066.2             | 2            | 3.0542 | 0.2559 |
| KKDKDDGGEDDDANCNLICGDEYGPETR     | 3189.3             | 3            | 6.1765 | 0.4415 |
| KKDLTQTASSTAR                    | 1407.6             | 2            | 2.8947 | 0.2007 |
| KKDPNEPQKPVSAALFFR               | 2236.6             | 3            | 4.1215 | 0.2791 |
| KKDQIGKGTQGATAGASSELDASK         | 2349.5             | 3            | 3.2862 | 0.2576 |
| KKDQVTAQEIFQDNHEDGPTAK           | 2500.7             | 3            | 5.2743 | 0.4615 |
| KKDQVTAQEIFQDNHEDGPTAKK          | 2628.8             | 3            | 3.6292 | 0.278  |
| KKDSPEPQVK                       | 1156.3             | 2            | 2.6205 | 0.1084 |
| KKDSQICELK                       | 1192.4             | 2            | 2.8735 | 0.2375 |
| KKDTAASGYGTQNIIR                 | 1610.8             | 2            | 4.0016 | 0.3473 |
| KKDVYVPEASRPHQWQTDEEGVR          | 2756.0             | 3            | 3.8403 | 0.3308 |

| Peptide Sequence                      | Peptide mass (m/z) | Charge State | Xcorr  | DelCn2 |
|---------------------------------------|--------------------|--------------|--------|--------|
| KKDYEVELLR                            | 1293.5             | 2            | 2.7607 | 0.2091 |
| KKEAISDLQQLWK                         | 1587.8             | 2            | 4.5093 | 0.3412 |
| KKEDALNETR                            | 1204.3             | 2            | 3.1423 | 0.2755 |
| KKEDDMETK                             | 1124.2             | 2            | 2.7973 | 0.18   |
| KKEEEDDDMKELENWAGSM                   | 2285.5             | 2            | 4.945  | 0.4186 |
| KKEEGVIDSSDKEIVAEAER                  | 2233.4             | 3            | 5.301  | 0.3746 |
| KKEEKPNGKIPDHDPAPNVTVLLR              | 2697.1             | 3            | 4.213  | 0.3228 |
| KKEELASTAEK                           | 1234.4             | 2            | 2.76   | 0.1114 |
| KKEELASTAEKTEQKEPKPLEK                | 2542.9             | 3            | 5.9793 | 0.3188 |
| KKEEPSQNDISPK                         | 1500.6             | 2            | 3.6913 | 0.241  |
| KKEFEELIDSNHDGIVTAEELSYMDPMNEYNALNEAK | 4418.8             | 3            | 5.4336 | 0.4238 |
| KKEGETVEPYK                           | 1308.5             | 2            | 3.1372 | 0.2195 |
| KKEHGSLPQQTTLLDLMDALPSSGPAQK          | 3063.5             | 3            | 3.763  | 0.2206 |
| KKEIEELQSQAQALSQEGK                   | 2145.4             | 2            | 6.4086 | 0.4332 |
| KKEIEELQSQAQALSQEGKSTDEVDSK           | 3007.2             | 3            | 5.6621 | 0.3957 |
| KKEKEFEETMDALQADIDQLEAEKAELK          | 3281.6             | 3            | 7.2798 | 0.3924 |
| KKELEEEVNNFQK                         | 1635.8             | 2            | 5.1045 | 0.2742 |
| KKELEEIVQPIISK                        | 1655.0             | 2            | 5.1218 | 0.3649 |
| KKELEEIVQPIISKLYGSAGPPPTGEEDTAEKDEL   | 3813.2             | 3            | 5.3544 | 0.4009 |
| KKELEHVNLSVK                          | 1424.7             | 2            | 3.9105 | 0.2613 |
| KKELQELNELFKPVVAAQK                   | 2213.6             | 3            | 5.4236 | 0.268  |
| KKELVNNLGEIYQK                        | 1676.9             | 2            | 4.7997 | 0.3898 |
| KKEPAITSQNSPEAR                       | 1656.8             | 3            | 4.4711 | 0.3664 |
| KKEPELFQTVAEGLR                       | 1746.0             | 3            | 3.9424 | 0.2947 |
| KKEPEPNFQLLDNPAR                      | 1897.1             | 2            | 4.3766 | 0.3236 |
| KKEPVGDDSEVPENVLSFDDLTADALANLK        | 3231.5             | 3            | 6.7654 | 0.5092 |
| KKEQEPEKVDTEEDGKAEVASEK               | 2604.8             | 3            | 4.7528 | 0.2327 |
| KKESDLPSAILQTSQGVSEFTK                | 2266.5             | 3            | 5.2296 | 0.4286 |
| KKESILDLSK                            | 1161.4             | 2            | 2.5643 | 0.1541 |
| KKETVSEAPLLFSDEEEKEAQLGVK             | 2903.2             | 3            | 5.4864 | 0.3948 |
| KKEVFPFPEVSQDELNEINQFLGPVEK           | 3162.5             | 3            | 6.664  | 0.4448 |
| KKEVPAVPETLK                          | 1339.6             | 2            | 3.7511 | 0.1841 |
| KKEVPAVPETLKK                         | 1467.8             | 2            | 4.2803 | 0.2643 |
| KKFAENPKAGDEFVEK                      | 1838.1             | 2            | 4.9993 | 0.3464 |
| KKFAYGYIEDLK                          | 1475.7             | 2            | 4.0187 | 0.3135 |
| KKFDDGEDPLDAESQQGGGGNPFHR             | 2702.8             | 3            | 6.0497 | 0.5359 |



| Peptide Sequence                       | Peptide mass (m/z) | Charge State | Xcorr  | DelCn2 |
|----------------------------------------|--------------------|--------------|--------|--------|
| KKFEESIHDVAFHPSK                       | 1900.1             | 2            | 3.5131 | 0.3391 |
| KKFQEILER                              | 1191.4             | 2            | 2.7128 | 0.1456 |
| KKGEPGPPDADGPLYLPYK                    | 2043.3             | 3            | 5.3695 | 0.4057 |
| KKGFTTAILTNTWLDDR                      | 1981.2             | 2            | 2.5615 | 0.2604 |
| KKGGPSPGDVEAIK                         | 1383.6             | 2            | 3.3355 | 0.3238 |
| KKGPGAGSALDDGR                         | 1329.4             | 2            | 2.8615 | 0.282  |
| KKGPLVFGPIAASLGTDGTHYWSK               | 2661.0             | 3            | 6.11   | 0.5064 |
| KKGPPDADGPLYLPYK                       | 1760.0             | 2            | 3.3414 | 0.205  |
| KKGPSTVTDLEDTKR                        | 1675.9             | 2            | 3.1231 | 0.3429 |
| KKGTVVYGEPIASLGTDGSHYWSK               | 2683.0             | 3            | 6.4425 | 0.4466 |
| KKGVAVDYLPYK                           | 1375.6             | 2            | 3.0284 | 0.1433 |
| KKGVEPSPSPIKPGDIK                      | 1778.1             | 2            | 3.233  | 0.2043 |
| KKHELEMDLESLEAANQSLQADLK               | 2742.1             | 3            | 4.98   | 0.3462 |
| KKHLEDEL                               | 1012.1             | 1            | 2.3402 | 0.2003 |
| KKIDILLKAVGDTPIPKTKKWAVERTRTIQGLIDFIKK | 4398.3             | 3            | 3.5325 | 0.1587 |
| KKIEPEAVLQTR                           | 1412.7             | 3            | 4.8546 | 0.2302 |
| KKILATPPQEDAPSVDIANIR                  | 2277.6             | 3            | 5.5108 | 0.4754 |
| KKKDELDPLLTR                           | 1456.7             | 2            | 3.3386 | 0.2715 |
| KKKEDELWASFLNDVGPK                     | 2105.4             | 3            | 5.1095 | 0.3507 |
| KKKEEGVIDSSDKEIVAEAEER                 | 2361.6             | 2            | 6.2205 | 0.4645 |
| KKLDAQVQELHAK                          | 1508.7             | 2            | 5.0336 | 0.3708 |
| KKLDESIYDVAFHSSK                       | 1868.1             | 3            | 4.031  | 0.3885 |
| KKLDSLGLCSVSCALEFIPNSK                 | 2353.8             | 3            | 3.6161 | 0.2723 |
| KKLEEAASR                              | 1032.2             | 2            | 2.8319 | 0.1585 |
| KKLEGELEELKAQMASAGQGKEEAVK             | 2803.2             | 3            | 5.9522 | 0.4633 |
| KKLEMDLKDLEAHIDSANK                    | 2199.5             | 3            | 6.2139 | 0.4389 |
| KKLEMDLKDLEAHIDSANKNRDEAIK             | 3026.4             | 3            | 4.0904 | 0.231  |
| KKLEQLYNR                              | 1192.4             | 2            | 2.5267 | 0.1298 |
| KKLGELTGTVK                            | 1174.4             | 2            | 3.1103 | 0.1822 |
| KKLLADQAEAR                            | 1243.4             | 2            | 3.6603 | 0.2094 |
| KKLQLSLADFR                            | 1319.6             | 2            | 2.6459 | 0.1401 |
| KKLVFPVPLDALSL                         | 1540.9             | 2            | 3.238  | 0.3023 |
| KKMDLIDLEDETIDAEMNSLAVTMDDFR           | 3359.8             | 3            | 5.7011 | 0.512  |
| KKMQQNIQELEEQLLEEEESAR                 | 2590.8             | 3            | 6.0591 | 0.2849 |
| KKNAPPEPVPPPR                          | 1427.7             | 2            | 4.1676 | 0.4084 |
| KKNDIYGED                              | 1082.1             | 2            | 2.5891 | 0.1786 |

| Peptide Sequence                | Peptide mass (m/z) | Charge State | Xcorr  | DelCn2 |
|---------------------------------|--------------------|--------------|--------|--------|
| KKNEELEQLYQDQEVKPK              | 2344.6             | 3            | 6.1702 | 0.3724 |
| KKNEGVNWLK                      | 1244.4             | 2            | 3.0726 | 0.1084 |
| KKNGPLEVAGAAVSAGHGLPAK          | 2073.4             | 2            | 6.3425 | 0.486  |
| KKNLQYYDISAK                    | 1471.7             | 2            | 4.0324 | 0.2982 |
| KKNLSPGAVESDVR                  | 1500.7             | 2            | 2.5049 | 0.2204 |
| KKNPEPWETVDPTVPQK               | 1994.2             | 2            | 4.3821 | 0.2838 |
| KKNVIQSVLQAIR                   | 1497.8             | 2            | 3.7658 | 0.2057 |
| KKNYDPVSIQK                     | 1530.8             | 2            | 4.0594 | 0.1229 |
| KKPFMLDEEGDTQTEETQPSETK         | 2669.9             | 3            | 4.3998 | 0.2017 |
| KKPFVYTQGQAVLNR                 | 1750.0             | 3            | 5.1055 | 0.3981 |
| KKPIQEPEVPQIDVNLKPIFGIPLADAVK   | 3453.0             | 3            | 5.2554 | 0.4373 |
| KKPPVATEGESALNFNLFK             | 2220.5             | 3            | 5.3711 | 0.5034 |
| KKPSEEEAAAAAGGPPGGPQVNPVPTDEVV  | 3013.3             | 3            | 4.3829 | 0.2722 |
| KKPSLDDLKELMPDVGR               | 1942.3             | 2            | 3.387  | 0.2245 |
| KKPTPIQLNPAPDGSVNGTSSAETNLEALQK | 3278.6             | 3            | 6.9429 | 0.4292 |
| KKPTPVLLPQSK                    | 1336.6             | 2            | 3.1292 | 0.2851 |
| KKQDFDEDDILKELEELSLEAQQIK       | 2935.2             | 3            | 5.6016 | 0.399  |
| KKQDPPVTHDLR                    | 1434.6             | 2            | 3.0203 | 0.2537 |
| KKQEALVAR                       | 1043.2             | 2            | 3.1865 | 0.1185 |
| KKQEEEVSTLRK                    | 1475.7             | 2            | 3.4204 | 0.1467 |
| KKQEESLKKQVEQSSASQTGIK          | 2549.8             | 3            | 4.8857 | 0.4022 |
| KKQEGIVGSSR                     | 1189.3             | 2            | 2.9521 | 0.169  |
| KKQEQLTPGVVYVR                  | 1645.9             | 2            | 4.2323 | 0.1515 |
| KKQGEDNSTAQDTEELEKEIREDLPVNTSK  | 3433.6             | 3            | 4.6103 | 0.1228 |
| KKQGIVTPIEAQTR                  | 1569.8             | 2            | 3.9747 | 0.2862 |
| KKQIEELKGQEVSPK                 | 1742.0             | 2            | 5.1972 | 0.2942 |
| KKQLAEQEELER                    | 1501.7             | 2            | 4.0558 | 0.2607 |
| KKQQDVLGFLEANK                  | 1618.9             | 2            | 5.279  | 0.1911 |
| KKQQDVLGFLEANKIGFEK             | 2322.6             | 3            | 5.3543 | 0.3774 |
| KKQQDVLGFLEANKIGFEKDIANEENRK    | 3463.8             | 3            | 4.9241 | 0.3065 |
| KKQSDVMR                        | 992.2              | 2            | 2.4774 | 0.1492 |
| KKQVAVAELLENVGVNEHDGGAQPGVPK    | 3110.5             | 3            | 6.06   | 0.3764 |
| KKQYEDALMQLESVLR                | 1952.3             | 2            | 3.9811 | 0.3446 |
| KKSDLEIELLKR                    | 1472.8             | 3            | 4.5158 | 0.244  |
| KKSEAPSGESR                     | 1176.3             | 2            | 2.7721 | 0.143  |
| KKSEIQLKKEIEQSLTK               | 2133.4             | 3            | 4.6404 | 0.2407 |

| Peptide Sequence                 | Peptide mass (m/z) | Charge State | Xcorr  | DelCn2 |
|----------------------------------|--------------------|--------------|--------|--------|
| KKSNLELFKEELK                    | 1606.9             | 2            | 4.1344 | 0.2556 |
| KKSPNELVDDLK                     | 1533.8             | 2            | 3.5729 | 0.3082 |
| KKSPVPVETLKDVK                   | 1568.9             | 2            | 3.6685 | 0.3227 |
| KKTDELPLQLVTLPHPNLHGPEILDVPSTVQK | 3446.0             | 3            | 5.4626 | 0.3195 |
| KKTDELK                          | 890.0              | 2            | 2.6726 | 0.1154 |
| KKTEAYLPDDKNK                    | 1550.7             | 2            | 4.0434 | 0.2534 |
| KKTVDDVIKEQNR                    | 1573.8             | 2            | 4.185  | 0.3884 |
| KKVDDDLGTIESLEEAK                | 1891.1             | 2            | 5.7155 | 0.3412 |
| KKVDDDLGTIESLEEAKK               | 2019.2             | 3            | 5.2124 | 0.3982 |
| KKVDDDLGTIESLEEAKKK              | 2147.4             | 2            | 5.5294 | 0.3953 |
| KKVEAQLQELQVK                    | 1541.8             | 2            | 5.4862 | 0.2734 |
| KKVEEVLEEEEEYYVEK                | 2238.4             | 3            | 4.6849 | 0.2763 |
| KKVETEA                          | 933.1              | 2            | 2.469  | 0.1128 |
| KKVNPDLQVEVKPSIR                 | 1851.2             | 3            | 3.226  | 0.1877 |
| KKVPVSVNLLSK                     | 1312.6             | 2            | 3.4062 | 0.3005 |
| KKVVDPFK                         | 1048.3             | 2            | 3.0248 | 0.1846 |
| KKVVDPFKSK                       | 1176.4             | 2            | 2.9787 | 0.1029 |
| KKWDSNVIETFDIAR                  | 1823.0             | 2            | 3.8357 | 0.3852 |
| KKWENPGLGAESHTDSLK               | 2026.2             | 2            | 4.9849 | 0.3486 |
| KKWNLDELK                        | 1271.5             | 2            | 3.0451 | 0.1252 |
| KKWNLDELKFEK                     | 1676.0             | 2            | 3.2822 | 0.3083 |
| KKYDVDTLDMVFLDHWK                | 2154.5             | 3            | 3.4602 | 0.1897 |
| KKYNDSDSDSYFTSSSSYFDEPVELR       | 3096.2             | 3            | 5.5841 | 0.4214 |
| KKYPDRVPIVEK                     | 1571.9             | 2            | 3.8563 | 0.2282 |
| KKYPYWPHQPIENL                   | 1814.1             | 2            | 3.0899 | 0.3079 |
| KLAAAEGLPK                       | 1127.3             | 2            | 2.9796 | 0.267  |
| KLAADAGTFLSR                     | 1250.4             | 2            | 2.6801 | 0.1615 |
| KLADKTDHKGELPR                   | 1608.8             | 2            | 3.7621 | 0.3689 |
| KLADMYGGGEDD                     | 1271.3             | 2            | 2.5213 | 0.2443 |
| KLADSDQASK                       | 1063.1             | 2            | 3.5349 | 0.3175 |
| KLAEEDLFDLSEAHPEEGDLSESTAHQSSK   | 3558.7             | 3            | 6.5592 | 0.4834 |
| KLAEQFPR                         | 989.2              | 2            | 2.5957 | 0.1647 |
| KLAFAYLEDLHSEFDEQHGK             | 2378.6             | 3            | 5.8324 | 0.4603 |
| KLAFAYLEDLHSEFDEQHGKK            | 2506.8             | 3            | 3.6046 | 0.1288 |
| KLAPANPAVITCDELLLGHEK            | 2193.6             | 3            | 4.5479 | 0.3124 |
| KLAGEKEELLSQIR                   | 1614.9             | 2            | 4.0545 | 0.3143 |

| Peptide Sequence                         | Peptide mass (m/z) | Charge State | Xcorr  | DelCn2 |
|------------------------------------------|--------------------|--------------|--------|--------|
| KLALQEFSELNER                            | 1577.8             | 2            | 3.9148 | 0.1684 |
| KLALQLHPDRNPDDPQAQEK                     | 2314.5             | 3            | 5.5471 | 0.407  |
| KLALQWHPDNFQNEEEK                        | 2127.3             | 2            | 2.6001 | 0.113  |
| KLANSEPVGTQTAK                           | 1444.6             | 2            | 4.4069 | 0.4174 |
| KLAPEYEK                                 | 978.1              | 1            | 2.1188 | 0.1331 |
| KLAQQYYLVYQEPIPTAQLVQR                   | 2651.1             | 3            | 5.5728 | 0.287  |
| KLAQTFSPSIDILK                           | 1561.8             | 2            | 3.1351 | 0.1469 |
| KLAQTLGLEVLGDIPLHLNIR                    | 2314.8             | 3            | 5.0156 | 0.3492 |
| KLASDAGIFFTR                             | 1326.5             | 2            | 3.5811 | 0.3322 |
| KLASLKPAER                               | 1113.3             | 2            | 2.8597 | 0.1025 |
| KLASQGDSISSQLGPIHPPPR                    | 2186.5             | 2            | 5.5255 | 0.4085 |
| KLAVNMVPPFR                              | 1272.6             | 2            | 3.8014 | 0.3293 |
| KLAVNNIAGIEEVNMIKDDGTVIHFNNPK            | 3195.6             | 3            | 5.5124 | 0.1971 |
| KLCFKENAEQGEVDMESHR                      | 2251.5             | 3            | 3.6604 | 0.2103 |
| KLCQGLFFR                                | 1112.4             | 2            | 2.428  | 0.1103 |
| KLDAGNQLALIEELHKEIR                      | 2191.5             | 3            | 5.2018 | 0.4571 |
| KLDAQVQELHAK                             | 1380.6             | 2            | 4.2365 | 0.3494 |
| KLDDASK                                  | 776.9              | 1            | 2.2608 | 0.2181 |
| KLDDFVETGDIR                             | 1408.5             | 2            | 3.7842 | 0.3622 |
| KLDDQSEDEALELEGPLITPGSGSIYSSPGLYSK       | 3597.9             | 3            | 5.9342 | 0.376  |
| KLDDSYSEAVRQNEELNLLKAQLNETLTK            | 3364.7             | 3            | 4.087  | 0.1702 |
| KLDEAVAEAHLGK                            | 1381.6             | 2            | 5.2456 | 0.3978 |
| KLDEAVAEAHLGKLNVK                        | 1836.1             | 2            | 5.7452 | 0.4825 |
| KLDEEALLKK                               | 1187.4             | 2            | 2.7773 | 0.1057 |
| KLDEKENLSAK                              | 1275.4             | 2            | 2.8072 | 0.2047 |
| KLDELLGKDHTQVVSLKDKLEFAPK                | 2853.3             | 3            | 6.1286 | 0.4507 |
| KLDELYGTWR                               | 1281.4             | 2            | 3.5146 | 0.1661 |
| KLDEQYQK                                 | 1052.2             | 2            | 2.6425 | 0.1244 |
| KLDGETTDLQDQIAELQAQIDELK                 | 2715.9             | 3            | 4.5662 | 0.1685 |
| KLDGETTDLQDQIAELQAQIDELKLQLAK            | 3269.6             | 3            | 6.4843 | 0.4281 |
| KLDGETTDLQDQIAELQAQIDELKLQLAKKEEELQGALAR | 4495.0             | 3            | 6.2407 | 0.4887 |
| KLDGFPLLR                                | 1059.3             | 2            | 2.9464 | 0.2031 |
| KLDKENLSDER                              | 1347.5             | 2            | 2.5532 | 0.1841 |
| KLDLEAWFPGSGAFR                          | 1694.9             | 2            | 4.7877 | 0.3917 |
| KLDLFANVVHVK                             | 1383.7             | 2            | 4.7884 | 0.2803 |
| KLDLSNVQSK                               | 1132.3             | 2            | 2.5788 | 0.1593 |

| Peptide Sequence                          | Peptide mass (m/z) | Charge State | Xcorr  | DelCn2 |
|-------------------------------------------|--------------------|--------------|--------|--------|
| KLDNKDLFGK                                | 1178.4             | 2            | 3.5503 | 0.2165 |
| KLDNKDLFGKSDPYLEFHK                       | 2295.6             | 3            | 3.3624 | 0.1437 |
| KLDNTTAAVQELGR                            | 1516.7             | 2            | 4.1922 | 0.341  |
| KLDNTTAAVQELGRENQSLQIK                    | 2457.7             | 3            | 4.4477 | 0.2404 |
| KLDPAQSASR                                | 1073.2             | 2            | 2.8519 | 0.2119 |
| KLDPELHLDIK                               | 1321.5             | 2            | 3.4064 | 0.2428 |
| KLDPGSEETQTLVR                            | 1573.7             | 2            | 4.1682 | 0.3872 |
| KLDQEMEQLNHHTTTR                          | 1982.2             | 2            | 4.7139 | 0.3766 |
| KLDREEIKPIR                               | 1397.6             | 3            | 3.8424 | 0.1601 |
| KLDSELTAR                                 | 1033.2             | 2            | 2.8465 | 0.164  |
| KLDSLTTSFGFPVGAATLVDEVGVDVAK              | 2838.2             | 3            | 5.2982 | 0.5545 |
| KLDSLTTSFGFPVGAATLVDEVGVDVAKHVAEDLGK      | 3688.1             | 3            | 4.6289 | 0.3532 |
| KLDSLTTSFGFPVGAATLVDEVGVDVAKHVAEDLGKVFGER | 4276.8             | 3            | 6.6542 | 0.5305 |
| KLDVEEPDSANSSFYSTR                        | 2046.1             | 2            | 4.6464 | 0.3013 |
| KLDVLSNDLVMNMLK                           | 1734.1             | 2            | 4.7733 | 0.3712 |
| KLDVSIEMPEELDISQLR                        | 2116.4             | 2            | 6.0129 | 0.4453 |
| KLDVSVK                                   | 789.0              | 1            | 2.2532 | 0.1419 |
| KLDVTIEPSEEPLFPADELYGIVGANLKR             | 3215.6             | 3            | 7.1472 | 0.4722 |
| KLDYGQHVAGTPGR                            | 1598.8             | 2            | 4.4102 | 0.4511 |
| KLEAAEDIAYQLSR                            | 1607.8             | 2            | 5.549  | 0.4384 |
| KLEAAEER                                  | 946.0              | 2            | 3.2003 | 0.1046 |
| KLEADSLEVK                                | 1132.3             | 2            | 2.7104 | 0.1308 |
| KLEADSLEVKASKEQALQDLQQQR                  | 2757.1             | 3            | 3.738  | 0.2428 |
| KLEAEADKIGLLLAAK                          | 1684.0             | 2            | 4.3769 | 0.3553 |
| KLEAELLQIEER                              | 1471.7             | 2            | 4.0308 | 0.2849 |
| KLEATIIGEWVK                              | 1387.6             | 2            | 4.4141 | 0.3674 |
| KLEDDRNSLQAAK                             | 1488.6             | 2            | 3.6744 | 0.1687 |
| KLEDGPK                                   | 786.9              | 1            | 2.3592 | 0.1573 |
| KLEDQLQGGQLEEVILQAEHELNLAR                | 2975.3             | 3            | 8.594  | 0.5744 |
| KLEDQLQGGQLEEVILQAEHELNLARK               | 3103.5             | 3            | 7.0202 | 0.4585 |
| KLEDQNEYESR                               | 1411.5             | 2            | 3.3791 | 0.2495 |
| KLEDSTRETQSQLETER                         | 2051.2             | 2            | 4.1875 | 0.2923 |
| KLEDVKNSPTFK                              | 1406.6             | 2            | 3.8645 | 0.3116 |
| KLEDYYKIDEK                               | 1444.6             | 2            | 3.3063 | 0.2308 |
| KLEEDDQAKDI                               | 1304.4             | 2            | 3.3628 | 0.1677 |
| KLEEEEDGKLLKPK                            | 1671.9             | 3            | 4.6638 | 0.2273 |

| Peptide Sequence                  | Peptide mass (m/z) | Charge State | Xcorr  | DelCn2 |
|-----------------------------------|--------------------|--------------|--------|--------|
| KLEEEGEQFVK                       | 1336.5             | 2            | 4.5809 | 0.2915 |
| KLEEEGEQFVKK                      | 1464.6             | 2            | 4.2611 | 0.3031 |
| KLEEEQIILEDQNCK                   | 1833.1             | 2            | 5.5549 | 0.3031 |
| KLEEEERHNLITEMVALNPDFKPPADYKPPATR | 3722.2             | 3            | 3.6313 | 0.2012 |
| KLEEHEESLVGR                      | 1426.6             | 2            | 3.8448 | 0.2456 |
| KLEEIESLFDNR                      | 1493.6             | 2            | 3.6716 | 0.1855 |
| KLEEEIHQITNVEALIAR                | 2091.4             | 2            | 3.9887 | 0.2643 |
| KLEEIPKYKDLLK                     | 1618.0             | 2            | 3.5552 | 0.112  |
| KLEEKEHLLQSNIGTGEKELGLR           | 2623.0             | 3            | 4.8427 | 0.4167 |
| KLEELEKEEELR                      | 1545.7             | 2            | 2.878  | 0.1687 |
| KLEELELDEQK                       | 1502.6             | 2            | 3.7684 | 0.1407 |
| KLEELELDEQKK                      | 1630.8             | 2            | 5.1527 | 0.2155 |
| KLEELELDEQQR                      | 1530.7             | 2            | 4.4981 | 0.2595 |
| KLEELEQKYTYEHDPITK                | 2265.5             | 3            | 3.7791 | 0.3189 |
| KLEENNHKTEA                       | 1313.4             | 2            | 2.765  | 0.2553 |
| KLEERGFDKAYVVLGQFLVLKKDEDLYR      | 3373.9             | 3            | 3.3423 | 0.1246 |
| KLEEVVQILGDKFPCTLVAQK             | 2359.8             | 3            | 5.6805 | 0.5117 |
| KLEGGQQVGMHSK                     | 1399.6             | 3            | 3.6654 | 0.1864 |
| KLEGNPQGSNQGK                     | 1543.7             | 2            | 4.6492 | 0.3177 |
| KLEHLITELVHQR                     | 1616.9             | 2            | 5.4665 | 0.4237 |
| KLEHVIK                           | 867.1              | 2            | 3.012  | 0.1254 |
| KLEISSGK                          | 862.0              | 1            | 2.4076 | 0.1563 |
| KLELDILPLQEANAELSEK               | 2154.4             | 3            | 5.0017 | 0.3996 |
| KLELSDNIISGGLEVLAEK               | 2029.3             | 3            | 6.0964 | 0.4126 |
| KLELSDNR                          | 975.1              | 1            | 2.5465 | 0.2533 |
| KLELSDNRVSGGLEVLAEK               | 2058.3             | 2            | 3.2723 | 0.1184 |
| KLELSENR                          | 989.1              | 2            | 2.5179 | 0.1442 |
| KLEMDLKDLEAHIDSANK                | 2071.3             | 3            | 5.1801 | 0.3703 |
| KLEMDLKDLEAHIDSANKNR              | 2341.6             | 3            | 3.6382 | 0.2493 |
| KLEMDLKDLEAHIDSANKNRDEAIK         | 2898.2             | 3            | 4.407  | 0.2329 |
| KLENEVEQR                         | 1145.2             | 2            | 3.2503 | 0.1057 |
| KLENSPLGEALR                      | 1327.5             | 2            | 3.1801 | 0.2342 |
| KLEPVVFEK                         | 1089.3             | 2            | 2.6052 | 0.1406 |
| KLEQCNTLKK                        | 1334.6             | 2            | 3.1805 | 0.1717 |
| KLERPPETPTVDPTVKYER               | 2256.5             | 3            | 5.1168 | 0.372  |
| KLESTESR                          | 950.0              | 1            | 2.5715 | 0.1863 |

| Peptide Sequence              | Peptide mass (m/z) | Charge State | Xcorr  | DelCn2 |
|-------------------------------|--------------------|--------------|--------|--------|
| KLESVFFHSLSGSK                | 1566.8             | 2            | 3.1566 | 0.2486 |
| KLETLSLNNHRLR                 | 1552.8             | 2            | 4.163  | 0.4192 |
| KLETTKKPDNVPK                 | 1498.7             | 2            | 3.7136 | 0.2482 |
| KLEVNEAELLR                   | 1314.5             | 2            | 3.5758 | 0.2967 |
| KLEWPLTEVAEGVFETEAPGGYK       | 2551.8             | 2            | 3.5572 | 0.3018 |
| KLEWPLTEVAEGVFETEAPGGYKFYLQNR | 3373.8             | 3            | 3.9748 | 0.3031 |
| KLFDTLNEDLFQK                 | 1611.8             | 2            | 4.681  | 0.3522 |
| KLFEAEEQDLFKDIQSLPR           | 2307.6             | 3            | 5.3934 | 0.4294 |
| KLFEELVR                      | 1034.2             | 2            | 2.4633 | 0.1609 |
| KLFGQESGPSAEK                 | 1378.5             | 2            | 2.896  | 0.1753 |
| KLFIGGLSFETDDSLR              | 1900.1             | 2            | 3.9148 | 0.4046 |
| KLFIGGLSFETDDSLREHFKEK        | 2570.8             | 3            | 5.342  | 0.401  |
| KLFIGGLSFETTDESLR             | 1914.1             | 3            | 4.5044 | 0.11   |
| KLFIGGLSFETTEESLR             | 1928.2             | 2            | 5.6026 | 0.3538 |
| KLFIGGLSFETTEESLRNYEQWGK      | 2997.3             | 3            | 3.4689 | 0.1553 |
| KLFLVQLQEK                    | 1246.5             | 2            | 3.0272 | 0.1625 |
| KLFNESHGIFLGLQR               | 1760.0             | 2            | 2.6622 | 0.1747 |
| KLFNLSKEDDVR                  | 1464.6             | 2            | 3.6823 | 0.2188 |
| KLFVGGIKEDTEEHHLR             | 2009.3             | 2            | 5.6546 | 0.3397 |
| KLFVGGIKEDTEEHHLRDYFEEYGK     | 3041.3             | 3            | 6.0199 | 0.2553 |
| KLFVGGIKEDTEEYNLR             | 2012.3             | 2            | 4.8186 | 0.3585 |
| KLFVGGIKEDTEEYNLRDYFEK        | 2695.0             | 3            | 4.9383 | 0.2751 |
| KLFVGGGLKGDVAEGDLIEHFSQFGTVEK | 3022.4             | 3            | 5.9355 | 0.3535 |
| KLFVGMLGK                     | 993.3              | 2            | 2.8307 | 0.1941 |
| KLFYSTFATDDRK                 | 1592.8             | 3            | 4.5866 | 0.425  |
| KLFYSTFATDDRKEGMTAFVEK        | 2585.9             | 3            | 3.2748 | 0.1753 |
| KLFYSTFATDDRKEGMTAFVEKR       | 2742.1             | 3            | 3.9651 | 0.2573 |
| KLGDYPSISNAR                  | 1422.6             | 2            | 2.5833 | 0.2064 |
| KLGDVSPTQIDVSQFGSKEDTK        | 2527.8             | 3            | 4.8974 | 0.3827 |
| KLKEMWNNLNDSEKQPYITK          | 2409.7             | 3            | 5.0708 | 0.3419 |
| KLKEMWNNNTAADDKQPYEK          | 2239.5             | 3            | 4.7341 | 0.3581 |
| KLKEMWNNNTAADDKQPYEKK         | 2367.6             | 3            | 3.9718 | 0.1587 |
| KLKEMWSEQSAK                  | 1394.6             | 2            | 2.6395 | 0.1986 |
| KLGFSHFGNIR                   | 1276.5             | 2            | 2.4679 | 0.2287 |
| KLGGSLADSYLDEGFLLDKK          | 2170.4             | 2            | 5.9474 | 0.4811 |
| KLGGSQEDQIK                   | 1203.3             | 2            | 3.2413 | 0.1506 |

| Peptide Sequence                    | Peptide mass (m/z) | Charge State | Xcorr  | DelCn2 |
|-------------------------------------|--------------------|--------------|--------|--------|
| KLGGSQEDQIKNAIDK                    | 1744.9             | 3            | 3.4023 | 0.1334 |
| KLGGSQEDQIKNAIDKLFVLFGAIEILK        | 2976.5             | 3            | 3.4707 | 0.2228 |
| KLGGSQEDQIKNAIDKLFVLFGAIEILKKIPGR   | 3528.1             | 3            | 4.1066 | 0.2247 |
| KLGIDDLVHFDFMDPPAPETLMR             | 2659.1             | 3            | 4.5657 | 0.193  |
| KLGINSLQELK                         | 1243.5             | 2            | 3.3733 | 0.2382 |
| KLGIPTIVLPESTSLQVVQR                | 2250.7             | 2            | 4.7928 | 0.3883 |
| KLGLVFDDVVGIVEIINSKDVK              | 2401.8             | 3            | 6.0551 | 0.4555 |
| KLGMIAAGGTGITPMLQLIR                | 1971.5             | 2            | 3.8217 | 0.3097 |
| KLGNNCVFAPADVTSEKDVQTALALAK         | 2805.2             | 3            | 5.1448 | 0.3343 |
| KLGPTEGRPQLK                        | 1324.6             | 2            | 3.2904 | 0.1256 |
| KLGSTASLPFIQEHR                     | 1684.9             | 2            | 2.7462 | 0.25   |
| KLHAVVETLVNHR                       | 1516.8             | 2            | 2.9005 | 0.3202 |
| KLHEEEIQELQAQIQEQHVQIDVDVSKPDLTAALR | 4053.5             | 3            | 7.0689 | 0.5513 |
| KLHELTVMQDR                         | 1370.6             | 3            | 4.2926 | 0.3168 |
| KLHELTVMQDRR                        | 1526.8             | 2            | 2.9701 | 0.2567 |
| KLHFEDEVTTSPVLGLK                   | 1914.2             | 2            | 4.7152 | 0.4846 |
| KLHGTAQQLLQDSK                      | 1567.8             | 2            | 3.6571 | 0.2362 |
| KLHKFELACLANLCPETAEEK               | 2475.9             | 2            | 3.3736 | 0.2762 |
| KLHLLSRPQDGEAE                      | 1593.8             | 2            | 2.8797 | 0.2693 |
| KLHNILGVETGGPGGR                    | 1605.8             | 2            | 4.1776 | 0.4    |
| KLHPTDNFAQSSCFGLR                   | 1922.2             | 2            | 3.6655 | 0.282  |
| KLHVSTINLQK                         | 1281.5             | 2            | 3.0017 | 0.135  |
| KLHYNEGLNIK                         | 1329.5             | 2            | 3.6906 | 0.259  |
| KLIAEGPGETVLVAEEEAAR                | 2083.3             | 2            | 3.8871 | 0.4437 |
| KLIDDYDSTK                          | 1198.3             | 2            | 3.0748 | 0.2992 |
| KLIGTAVPQR                          | 1083.3             | 2            | 2.5148 | 0.2533 |
| KLIHLEIKPAIR                        | 1431.8             | 3            | 3.6987 | 0.2591 |
| KLILDSAR                            | 916.1              | 2            | 2.7511 | 0.1544 |
| KLILSDELKPAHR                       | 1520.8             | 2            | 3.6239 | 0.4173 |
| KLINDYVK                            | 993.2              | 2            | 2.8806 | 0.1182 |
| KLIQDQQEQIQHLK                      | 1750.0             | 3            | 4.3681 | 0.1677 |
| KLISVDTEHSNIYLQNGPDR                | 2300.5             | 3            | 3.3079 | 0.1572 |
| KLITSEEER                           | 1105.2             | 2            | 3.2756 | 0.243  |
| KLIVDSVKELDSK                       | 1474.7             | 2            | 4.4069 | 0.4409 |
| KLIVQPNTRLEGSDVQLLEYEASAAGLIR       | 3185.6             | 3            | 6.6514 | 0.3847 |
| KLIYFQLHR                           | 1218.5             | 3            | 3.439  | 0.186  |



| Peptide Sequence                   | Peptide mass (m/z) | Charge State | Xcorr  | DelCn2 |
|------------------------------------|--------------------|--------------|--------|--------|
| KLKDVLLQVDDER                      | 1571.8             | 2            | 4.5917 | 0.392  |
| KLKDVLLQVDDERR                     | 1728.0             | 2            | 3.6872 | 0.271  |
| KLKDYAFIHFDER                      | 1682.9             | 2            | 3.0118 | 0.1467 |
| KLKDYAFVHFEDR                      | 1668.9             | 2            | 4.237  | 0.3835 |
| KLKEDKAPQVDVDK                     | 1613.8             | 2            | 4.2812 | 0.3434 |
| KLKEDKAPQVDVDKAVAEK                | 2225.6             | 3            | 6.1877 | 0.4049 |
| KLKELEVAEGGK                       | 1301.5             | 2            | 3.7384 | 0.1847 |
| KLKELEVAEGGKAELER                  | 1900.2             | 2            | 5.8587 | 0.3902 |
| KLKFPEPQEVVEELKK                   | 1942.3             | 3            | 3.9679 | 0.1262 |
| KLKGTEDELDKYSEALKDAQEK             | 2539.8             | 3            | 3.8144 | 0.1746 |
| KLKGTEDELDKYSEALKDAQEKLELAEK       | 3223.6             | 3            | 6.8991 | 0.4607 |
| KLKTEQGGAHFSVSSLAEGSVTSVGSVNPAENFR | 3492.8             | 3            | 5.6342 | 0.4371 |
| KLKVEAPQALR                        | 1253.5             | 2            | 2.8411 | 0.2106 |
| KLLAAGQLADALSQFHAAVDGDPDNYIAYYR    | 3368.7             | 3            | 4.0945 | 0.2806 |
| KLLADQAEAR                         | 1115.3             | 2            | 3.3419 | 0.2722 |
| KLLAQPEKEK                         | 1184.4             | 2            | 3.18   | 0.1298 |
| KLLASLVKR                          | 1028.3             | 2            | 2.7159 | 0.1227 |
| KLLDIVAR                           | 928.2              | 2            | 2.6535 | 0.1433 |
| KLLDLVQQSCNYK                      | 1552.8             | 2            | 2.7092 | 0.1302 |
| KLLEAHEEQNVDSYTESVKEYDSISR         | 3071.3             | 3            | 5.7419 | 0.4331 |
| KLLEAQSHFR                         | 1229.4             | 2            | 3.3108 | 0.2037 |
| KLLEDRIAFTTNLTETEEEEKSKSLAK        | 3024.4             | 3            | 3.3612 | 0.1869 |
| KLLEGEEER                          | 1103.2             | 2            | 3.231  | 0.1539 |
| KLLEGEEERLK                        | 1344.5             | 2            | 3.0848 | 0.1115 |
| KLLEGEEERLR                        | 1372.6             | 2            | 3.3931 | 0.1945 |
| KLLEGEESRISLPLPNFSSLNLR            | 2614.0             | 3            | 4.3793 | 0.2831 |
| KLLEGEESRLESGMQNMSIHTK             | 2518.9             | 3            | 4.937  | 0.4601 |
| KLLELDPEHQR                        | 1378.6             | 2            | 3.3029 | 0.2094 |
| KLLERLPEVEVPQHL                    | 1801.1             | 2            | 4.3623 | 0.2222 |
| KLLHSFHSELPVLSDSER                 | 2095.3             | 2            | 5.1036 | 0.4563 |
| KLLIIGTTSR                         | 1102.4             | 2            | 2.801  | 0.1721 |
| KLLISDTQHYGVTVPHTR                 | 2167.5             | 3            | 5.2363 | 0.4039 |
| KLLPDDPYEK                         | 1218.4             | 2            | 2.9334 | 0.1508 |
| KLLSESAQPLKK                       | 1342.6             | 2            | 2.9503 | 0.1906 |
| KLLSKEPSPPIDEVINTPR                | 2134.5             | 2            | 3.853  | 0.3706 |
| KLLSSSETKR                         | 1149.3             | 2            | 2.9093 | 0.2002 |

| Peptide Sequence           | Peptide mass (m/z) | Charge State | Xcorr  | DelCn2 |
|----------------------------|--------------------|--------------|--------|--------|
| KLLTEEGQKIGTFER            | 1750.0             | 2            | 3.2391 | 0.2124 |
| KLLVDAIHNQLTDMEK           | 1869.2             | 2            | 3.2196 | 0.1678 |
| KLLVGSEDYGR                | 1237.4             | 2            | 3.0376 | 0.2538 |
| KLMDLSHR                   | 1000.2             | 2            | 2.4786 | 0.1694 |
| KLMEECKR                   | 1037.3             | 2            | 2.4017 | 0.1809 |
| KLMHQAALLGQALQDSR          | 1881.2             | 2            | 5.6902 | 0.4931 |
| KLMQLQHEK                  | 1155.4             | 2            | 2.8995 | 0.1165 |
| KLMQLQHEKAELEQHLEQEQEFQVNK | 3236.6             | 3            | 3.5254 | 0.1381 |
| KLMSDPDSSIIDFYPEDFAIDLNGKK | 2960.3             | 3            | 4.9449 | 0.37   |
| KLMVALAK                   | 874.2              | 2            | 2.931  | 0.2333 |
| KLNAFGNAFLNR               | 1365.6             | 2            | 3.0516 | 0.206  |
| KLNEILQAR                  | 1085.3             | 2            | 2.9931 | 0.1187 |
| KLNELESDLTFK               | 1437.6             | 2            | 2.5838 | 0.1377 |
| KLNEQSPTR                  | 1073.2             | 2            | 2.5524 | 0.1104 |
| KLNFNGEGEPEELMVDNWRPAQPLK  | 2913.3             | 3            | 5.1285 | 0.3361 |
| KLNFQVELLLDKLK             | 1702.1             | 2            | 3.6125 | 0.2092 |
| KLNGLYPFR                  | 1108.3             | 2            | 2.7787 | 0.2507 |
| KLNHQEVVEEDKR              | 1624.8             | 2            | 3.7502 | 0.2085 |
| KLNKEELPVIK                | 1408.7             | 2            | 4.1165 | 0.2109 |
| KLNMDQVLDQILR              | 1586.9             | 2            | 3.7421 | 0.2722 |
| KLNQALLDLHALGSAR           | 1721.0             | 2            | 5.9971 | 0.5175 |
| KLNQQAEEELQEIHIEIQLQEK     | 2449.7             | 3            | 5.0641 | 0.3336 |
| KLNSPEETAFAQTPK            | 1590.8             | 2            | 3.7087 | 0.2406 |
| KLNTLVQISVIHPVEQSLTR       | 2276.7             | 3            | 3.6922 | 0.2443 |
| KLNVNAKPFVPNVHAAEFVPSFLR   | 2696.1             | 3            | 5.1311 | 0.4734 |
| KLNVSSDTVQHGVGLTYLLTESSK   | 2707.0             | 3            | 5.6006 | 0.4138 |
| KLNVTEQEK                  | 1089.2             | 1            | 2.9767 | 0.1836 |
| KLNVTEQEKIDK               | 1445.6             | 2            | 4.4845 | 0.28   |
| KLNVTEQEKIDKLMIEMDGTENK    | 2708.1             | 3            | 6.6302 | 0.488  |
| KLNVTEQEKIDKLMIEMDGTENKSK  | 2923.4             | 3            | 5.2148 | 0.4048 |
| KLPDSFFKPPPEPK             | 1530.8             | 2            | 3.5278 | 0.1709 |
| KLPEEEAECYFHSPK            | 1964.2             | 3            | 3.2659 | 0.2176 |
| KLPEELGRDQNTVETLQR         | 2127.3             | 2            | 3.6956 | 0.2268 |
| KLPFAEGLYHFYHNLAK          | 2106.4             | 2            | 5.214  | 0.4331 |
| KLPIDVTEGEVISLGLPFGK       | 2113.5             | 2            | 5.6649 | 0.5055 |
| KLPIQEFHLSR                | 1368.6             | 2            | 3.5556 | 0.2827 |

| Peptide Sequence                          | Peptide mass (m/z) | Charge State | Xcorr  | DelCn2 |
|-------------------------------------------|--------------------|--------------|--------|--------|
| KLPKNEPQNATGAPGR                          | 1678.9             | 2            | 3.5587 | 0.2296 |
| KLPKNEPQNPGANSAR                          | 1721.9             | 2            | 3.5046 | 0.3504 |
| KLPLTALAQNMQEASTQLEDSLLGK                 | 2701.1             | 3            | 5.6635 | 0.472  |
| KLPLPLSLTSQPHQVLASEPIPFSDLQQVSR           | 3411.9             | 3            | 6.1401 | 0.4729 |
| KLPSVEGLHAIVVSDR                          | 1721.0             | 2            | 4.4166 | 0.487  |
| KLPSVEGLHAIVVSDRDGVPVIK                   | 2429.8             | 3            | 4.8507 | 0.4545 |
| KLPVESIQIVLEELRK                          | 1895.3             | 2            | 4.5063 | 0.3388 |
| KLQAALQALER                               | 1370.6             | 2            | 3.2198 | 0.1506 |
| KLQAALISR                                 | 1000.2             | 2            | 2.4538 | 0.1447 |
| KLQEQEVFFK                                | 1296.5             | 2            | 3.6257 | 0.2753 |
| KLQEQLEKAEDGSSSK                          | 1777.9             | 2            | 5.2167 | 0.3475 |
| KLQEQLEKAEDGSSSKEGTSV                     | 2251.4             | 2            | 6.1206 | 0.4698 |
| KLQESTQTVQSLHGSSR                         | 1887.0             | 2            | 5.4886 | 0.5348 |
| KLQETQMSTTSKLEEAHKVQSLQTALEK              | 3317.7             | 3            | 4.318  | 0.2067 |
| KLQGEVEKYQQLQK                            | 1720.0             | 2            | 4.5302 | 0.3327 |
| KLQGGTPQEPPNPR                            | 1519.7             | 2            | 4.1206 | 0.2223 |
| KLQHDVLK                                  | 981.2              | 2            | 2.4347 | 0.1929 |
| KLQIQCVVEDDKVGTDMLEEQITAFEDYVQSMDDVAAFNKI | 4566.1             | 3            | 7.5388 | 0.543  |
| KLQIVQQEQQLHASNRPALAAK                    | 2472.8             | 3            | 3.8379 | 0.1825 |
| KLQKDLEGLSQR                              | 1415.6             | 2            | 3.1366 | 0.168  |
| KLQKDLEGLSQRHEEK                          | 1939.2             | 2            | 4.1411 | 0.2551 |
| KLQLSGHAMPR                               | 1238.5             | 2            | 3.3192 | 0.2771 |
| KLQNQLQGAIVIPNVK                          | 2049.4             | 3            | 3.852  | 0.2578 |
| KLQQELEFLEVQEEYIKDEQK                     | 2667.9             | 3            | 4.2258 | 0.3435 |
| KLQQENLKPQEQLTLEPYER                      | 2485.8             | 3            | 4.3908 | 0.3374 |
| KLQQGIPPSGPAGELKFEPHI                     | 2244.6             | 3            | 4.8029 | 0.4369 |
| KLQSNPSLEGVSHVIVDEVHER                    | 2473.7             | 3            | 4.2478 | 0.2639 |
| KLRESXESQLESGMQNMSIHTK                    | 2547.9             | 2            | 3.2169 | 0.2695 |
| KLRETAEADVASLNR                           | 1673.9             | 3            | 3.9954 | 0.2714 |
| KLRETAEADVASLNRR                          | 1830.0             | 2            | 3.8672 | 0.2985 |
| KLSDDNTIGKEEIQQR                          | 1875.0             | 2            | 4.6092 | 0.153  |
| KLSEADNR                                  | 933.0              | 1            | 2.6046 | 0.1894 |
| KLSELERPHK                                | 1237.4             | 2            | 2.9879 | 0.1521 |
| KLSELSNSQQSVQTLISLWLIHHR                  | 2706.1             | 3            | 4.8908 | 0.4399 |
| KLSFDFQ                                   | 885.0              | 2            | 2.745  | 0.1765 |
| KLISGLNAFDIAEELVK                         | 1748.0             | 2            | 3.543  | 0.3496 |

| Peptide Sequence                | Peptide mass (m/z) | Charge State | Xcorr  | DelCn2 |
|---------------------------------|--------------------|--------------|--------|--------|
| KLSKPSQVSSGQK                   | 1374.6             | 2            | 3.2783 | 0.299  |
| KLSLQERPAGSYLEAQAGPYATGPASHISPR | 3254.6             | 3            | 6.6438 | 0.3881 |
| KLSLTLHPDKNKDENAETQFR           | 2485.7             | 3            | 4.9763 | 0.3319 |
| KLSMYGVDLHHAK                   | 1499.8             | 2            | 3.5051 | 0.2836 |
| KLSQMILDKK                      | 1204.5             | 3            | 3.2881 | 0.124  |
| KLSQRPTVAELLAR                  | 1582.9             | 2            | 2.44   | 0.1148 |
| KLSSAMSAAK                      | 994.2              | 1            | 2.5108 | 0.1588 |
| KLSSWDQAETPGHTPSLR              | 2011.2             | 3            | 3.4682 | 0.1816 |
| KLSSWVLLMK                      | 1205.5             | 2            | 2.6526 | 0.1487 |
| KLSTIALALGVER                   | 1371.7             | 2            | 2.519  | 0.3134 |
| KLSYAEVCQKPPKEPSSVLVQPLR        | 2698.2             | 3            | 4.0638 | 0.332  |
| KLTATPTPLGGMTGFHMQTEDR          | 2390.7             | 3            | 4.7841 | 0.4421 |
| KLTDIINNDHENVK                  | 1653.8             | 2            | 4.6437 | 0.3564 |
| KLTDTSKDEENHEESES LQEDMLG NR    | 3036.1             | 3            | 5.426  | 0.3568 |
| KLTEIINTQHENVK                  | 1667.9             | 2            | 5.582  | 0.4059 |
| KLTELSMQDEELMKR                 | 1852.2             | 2            | 4.9144 | 0.4242 |
| KLTFLYLANDVIQNSK                | 1868.2             | 2            | 5.4056 | 0.4185 |
| KLTGIKHELQANCYEEVK              | 2104.4             | 2            | 4.9122 | 0.3346 |
| KLTGIKHELQANCYEEVKDR            | 2375.7             | 3            | 6.5933 | 0.4456 |
| KLTGKDVNFEFPEFQL                | 1913.2             | 2            | 4.037  | 0.2162 |
| KLTGMER                         | 835.0              | 1            | 2.2133 | 0.1651 |
| KLTLPAVVMHLK                    | 1463.9             | 2            | 2.9109 | 0.1692 |
| KLTPITYPQGLAMAK                 | 1633.0             | 2            | 3.4884 | 0.1045 |
| KLVAIVDPHIK                     | 1233.5             | 2            | 4.5402 | 0.3183 |
| KLVAIVDPHIKVDSGYR               | 1911.2             | 2            | 2.8889 | 0.2576 |
| KLVEALCAAGHR                    | 1268.5             | 2            | 3.7665 | 0.3062 |
| KLVEGLSALVVDVK                  | 1470.8             | 2            | 4.7484 | 0.4016 |
| KLVESLPQEIK                     | 1284.5             | 2            | 3.7375 | 0.1554 |
| KLVESLPQEIKANVAK                | 1768.1             | 2            | 2.4398 | 0.1517 |
| KLVGYLDR                        | 964.1              | 2            | 3.0332 | 0.2486 |
| KLVHDKELAAEDEQVFLMK             | 2244.6             | 2            | 4.481  | 0.3752 |
| KLVIIEGDLER                     | 1285.5             | 2            | 4.1287 | 0.2668 |
| KLVIIEGDLERTEER                 | 1801.0             | 2            | 3.9475 | 0.3748 |
| KLVIIEGDLERTEERAELAESR          | 2557.8             | 2            | 3.87   | 0.3396 |
| KLVIIESDLER                     | 1315.5             | 2            | 3.9787 | 0.2713 |
| KLVIIESDLERAEEER                | 1801.0             | 3            | 3.6294 | 0.2499 |

| Peptide Sequence                  | Peptide mass (m/z) | Charge State | Xcorr  | DelCn2 |
|-----------------------------------|--------------------|--------------|--------|--------|
| KLVIIESDLERAEEERAEELSEGQVR        | 2771.1             | 3            | 4.2808 | 0.3103 |
| KLVILEGELER                       | 1299.5             | 2            | 3.926  | 0.2208 |
| KLVILEGELERAEEER                  | 1785.0             | 2            | 3.7716 | 0.3242 |
| KLVILEGELERAEEERAEVSELK           | 2541.9             | 3            | 4.9499 | 0.3405 |
| KLVINSGNGAVEDR                    | 1472.6             | 2            | 3.8061 | 0.1668 |
| KLVINSGNGAVEDRKPSGLNGEASK         | 2541.8             | 3            | 4.199  | 0.3275 |
| KLVIPSELGYGER                     | 1461.7             | 3            | 3.9968 | 0.2321 |
| KLVNSVAGCADDALAGLVACNPQLQLLQGH    | 3162.6             | 3            | 5.2457 | 0.3878 |
| KLVPLLLLEDGGEAPAALAEALEEK         | 2477.8             | 3            | 5.7862 | 0.5206 |
| KLVPLLLLEDGGEAPAALAEALEEKSALEQMR  | 3293.8             | 3            | 6.4409 | 0.4482 |
| KLVPLLLLEDGGEAPAALAEALEEKSALEQMRK | 3422.0             | 3            | 6.8424 | 0.4917 |
| KLVSIADQLEK                       | 1343.6             | 2            | 2.6333 | 0.2643 |
| KLVSQEEMEFIQR                     | 1637.9             | 2            | 3.9871 | 0.3764 |
| KLVTDQNIENWR                      | 1603.8             | 2            | 3.9291 | 0.335  |
| KLVWVPSDK                         | 1072.3             | 2            | 2.9004 | 0.1477 |
| KLYHSEFTVNFVGDTEEAKK              | 2315.5             | 3            | 6.2626 | 0.4565 |
| KLYLQDNHINR                       | 1414.6             | 2            | 2.8829 | 0.2314 |
| KLYSIAAPAR                        | 1090.3             | 2            | 2.554  | 0.2324 |
| KLYSIILSAPIPEPK                   | 1670.0             | 2            | 3.2293 | 0.2875 |
| KMADLHAVPR                        | 1138.4             | 2            | 3.5571 | 0.3964 |
| KMAVDALEYDESAEDANPAGALEEILENPER   | 3391.6             | 3            | 3.9775 | 0.1529 |
| KMDADGFLPITLIASFHR                | 2033.4             | 3            | 4.6209 | 0.3656 |
| KMDAHPPR                          | 952.1              | 1            | 1.7722 | 0.1575 |
| KMDETDASSAVK                      | 1282.4             | 2            | 3.7378 | 0.305  |
| KMDEYVASLHLPSTDAHLTELTDDQAK       | 3076.4             | 3            | 6.0539 | 0.492  |
| KMDEYVASLHLPSTDAHLTELTDEQAK       | 3104.4             | 3            | 5.8226 | 0.2647 |
| KMDLIDLEDETIDAEVMNSLAVTMDDFR      | 3231.6             | 3            | 4.9286 | 0.4525 |
| KMEDSVGCLETAEEVVKR                | 1925.2             | 2            | 4.2738 | 0.3004 |
| KMEEVKEANIR                       | 1347.6             | 2            | 3.6716 | 0.2127 |
| KMEGVTVNAVLEHVKR                  | 1712.0             | 3            | 4.27   | 0.429  |
| KMEIDLKDLEAQIEAANK                | 2060.4             | 2            | 6.0108 | 0.3365 |
| KMEIDLKDLEAQIEAANKARDEVK          | 2872.3             | 3            | 3.2571 | 0.1566 |
| KMFESFIESVPLLK                    | 1669.0             | 2            | 4.045  | 0.4012 |
| KMGAPESGLAEYLFDKHTLGSDNES         | 2813.0             | 3            | 4.7845 | 0.4139 |
| KMGDHLTNLHR                       | 1322.5             | 2            | 3.1761 | 0.3416 |
| KMGEDMHTIGFGIYEVPEELSGQTNHLSK     | 3362.8             | 3            | 6.8747 | 0.3986 |

| Peptide Sequence          | Peptide mass (m/z) | Charge State | Xcorr  | DelCn2 |
|---------------------------|--------------------|--------------|--------|--------|
| KMGLVDQLVEPLGPGGLKPPEER   | 2403.8             | 2            | 7.4462 | 0.5133 |
| KMIQHAVFK                 | 1102.4             | 2            | 2.693  | 0.1976 |
| KMKPLDGSALYTGSAIDFVR      | 2170.5             | 3            | 4.4294 | 0.3927 |
| KMLKPAFIFDGR              | 1423.8             | 2            | 3.6999 | 0.2602 |
| KMLLQNYLQNR               | 1421.7             | 2            | 2.8097 | 0.2004 |
| KMMADEALGSGLVSR           | 1565.8             | 2            | 5.0897 | 0.368  |
| KMMTGGFFHK                | 1184.5             | 2            | 2.5167 | 0.1081 |
| KMMTKEELEEEQRTEE          | 2041.2             | 3            | 3.9987 | 0.191  |
| KMMTKEELEEEQRVQKEQLAAIFK  | 2938.4             | 3            | 4.1012 | 0.3114 |
| KMNALFEGR                 | 1066.3             | 2            | 2.7086 | 0.2768 |
| KMNDSNSAGAGGPVK           | 1433.6             | 2            | 4.081  | 0.2819 |
| KMNLGVGAYR                | 1109.3             | 2            | 2.7551 | 0.2589 |
| KMNLGVGAYRDDNGKPYVLPVSR   | 2550.9             | 3            | 6.0314 | 0.338  |
| KMNVSPDVNYEELAR           | 1766.0             | 2            | 4.874  | 0.3596 |
| KMQAHIQDLEEQLEDEEGAR      | 2370.5             | 3            | 5.1251 | 0.2781 |
| KMQELLQTQDFSK             | 1596.8             | 2            | 4.9127 | 0.3017 |
| KMQQENMKPQEQLTLEPYER      | 2521.9             | 3            | 4.5939 | 0.2446 |
| KMQQNIQELEEQLDEEEESAR     | 2462.6             | 3            | 5.7403 | 0.4008 |
| KMSLGQLQSAR               | 1219.4             | 2            | 2.5202 | 0.1881 |
| KMTFSEHPYNNLR             | 1637.8             | 2            | 2.5517 | 0.2231 |
| KMTPSYEIR                 | 1125.3             | 2            | 2.6625 | 0.1994 |
| KMVKDQQEAEK               | 1334.5             | 2            | 3.8003 | 0.1351 |
| KMYESFIESLPFLK            | 1733.1             | 2            | 4.2573 | 0.2882 |
| KNAALDVEPIHAFR            | 1581.8             | 2            | 2.9637 | 0.2634 |
| KNAGSLLTR                 | 960.1              | 2            | 2.7251 | 0.2638 |
| KNANKPLLDEIVPVYR          | 1870.2             | 3            | 4.3526 | 0.433  |
| KNDKEAAGEGPALYEDPPDQK     | 2273.4             | 2            | 4.7884 | 0.3999 |
| KNEESQEIQK                | 1233.3             | 2            | 2.9848 | 0.1211 |
| KNELETENR                 | 1133.2             | 2            | 2.9215 | 0.2151 |
| KNELLHLGGR                | 1137.3             | 2            | 2.9107 | 0.2091 |
| KNFATSLYSMIK              | 1403.7             | 2            | 4.1773 | 0.283  |
| KNFESLSEAFSVASAAVLSHNR    | 2436.7             | 3            | 7.2135 | 0.5541 |
| KNGGLGHMNIALLSDLTK        | 1883.2             | 3            | 5.1333 | 0.4411 |
| KNGPLEVAGAAVSAGHGLPAK     | 1945.2             | 2            | 4.449  | 0.4666 |
| KNGQHVASSPIPVVISQSEIGDASR | 2577.8             | 3            | 5.2452 | 0.3856 |
| KNHEEEISTLR               | 1356.5             | 2            | 3.728  | 0.2529 |

| Peptide Sequence                         | Peptide mass (m/z) | Charge State | Xcorr  | DelCn2 |
|------------------------------------------|--------------------|--------------|--------|--------|
| KNHEEEVK                                 | 1013.1             | 2            | 2.6709 | 0.1894 |
| KNHEEEVKGLQAQIASSGLTVEVDAPK              | 2879.2             | 3            | 6.8115 | 0.5292 |
| KNHEEEVKGLQAQIASSGLTVEVDAPKSQDLAK        | 3521.9             | 3            | 5.7782 | 0.4578 |
| KNIIIEEGKEILVGDVGGQTVDDPYATFVK           | 3192.6             | 3            | 6.2098 | 0.4993 |
| KNILDSKPTANK                             | 1329.5             | 2            | 2.6519 | 0.2211 |
| KNIPEGSHQYELLK                           | 1656.9             | 2            | 3.8389 | 0.2728 |
| KNIQATLHQQ                               | 1181.4             | 2            | 3.0069 | 0.1198 |
| KNKDKYVGVSSDSVGGFR                       | 1944.1             | 2            | 4.892  | 0.4635 |
| KNKEEAAEYAK                              | 1281.4             | 2            | 3.5173 | 0.1778 |
| KNKGGVAVKAHQVK                           | 1464.7             | 2            | 2.5737 | 0.1126 |
| KNLEAQHKELEEK                            | 1596.8             | 2            | 4.3341 | 0.2748 |
| KNLHGDGIALWYTR                           | 1644.9             | 2            | 2.6329 | 0.2969 |
| KNLLLEPSLEAK                             | 1355.6             | 2            | 2.8021 | 0.1215 |
| KNLNYLHLDYNFNLKPVK                       | 2234.6             | 3            | 3.4017 | 0.1927 |
| KNLVELAELELK                             | 1399.7             | 2            | 2.5256 | 0.1114 |
| KNNIDTHAR                                | 1069.2             | 2            | 3.0565 | 0.2193 |
| KNNRQPYAVSELAGHQ TSAESWG TGR             | 2846.0             | 3            | 5.4678 | 0.3647 |
| KNPAAYENDK                               | 1150.2             | 2            | 2.8621 | 0.2811 |
| KNPDSQYGELIEK                            | 1521.7             | 2            | 4.4209 | 0.4042 |
| KNPDSQYGELIEKYIKEGK                      | 2240.5             | 3            | 4.133  | 0.3188 |
| KNPEVPVNFAEFSK                           | 1606.8             | 2            | 4.3243 | 0.3382 |
| KNPEVPVNFAEFSKK                          | 1735.0             | 3            | 4.8914 | 0.3859 |
| KNPFGLVPVLENSQGQLIYESAITCEYLDEAYPGKK     | 4016.5             | 3            | 4.5583 | 0.4491 |
| KNPGVGNGDDEAAELMQQVNVLK                  | 2427.7             | 2            | 5.9226 | 0.5316 |
| KNPLPPSVGVVDKK                           | 1478.8             | 3            | 4.0587 | 0.338  |
| KNPLPPSVGVVDKKEETQPPVALKK                | 2700.2             | 3            | 3.5776 | 0.2141 |
| KNPQAVLDVLEFYNSK                         | 1866.1             | 2            | 3.0613 | 0.1894 |
| KNPSIAVPIVLKR                            | 1435.8             | 3            | 3.4449 | 0.2381 |
| KNPVKFEGGDRDLEHLSK                       | 2070.3             | 3            | 3.5643 | 0.2827 |
| KNQGVQPQIAVLVTHR                         | 1660.9             | 2            | 2.7209 | 0.1043 |
| KNQLKDMAIATGGAVFGEEGLTLNLEDVQPHDLGK      | 3711.2             | 3            | 4.1087 | 0.2181 |
| KNQLLLEFSFWNEPVPR                        | 2118.4             | 2            | 3.3405 | 0.1613 |
| KNREELDKYWSQQIEESTTVVTTQSAEVGAAETTLTELRR | 4600.0             | 3            | 4.2193 | 0.3342 |
| KNSLISSLEEEVSILNR                        | 1932.2             | 3            | 4.329  | 0.3478 |
| KNSVVEASEAAYK                            | 1396.5             | 2            | 3.9027 | 0.4203 |
| KNSVVEASEAAYKEAFEISK                     | 2201.4             | 2            | 6.0044 | 0.4706 |

| Peptide Sequence                    | Peptide mass (m/z) | Charge State | Xcorr  | DelCn2 |
|-------------------------------------|--------------------|--------------|--------|--------|
| KNTHENIQLSQSK                       | 1527.7             | 2            | 4.3863 | 0.3372 |
| KNTQVVSDAAYK                        | 1324.5             | 2            | 3.8177 | 0.4001 |
| KNVFIIGATNRPDIIDPAILRPGR            | 2648.1             | 3            | 4.5487 | 0.3114 |
| KNVLGHMQQGGAPSPFDR                  | 1940.2             | 2            | 5.1797 | 0.4872 |
| KNVLGHMQQGGAPSPFDRNFGTK             | 2487.8             | 3            | 5.2762 | 0.3343 |
| KNVLGHMQQGGSPFPFDR                  | 1970.2             | 2            | 5.0132 | 0.4786 |
| KNYGVTFPIFK                         | 1451.7             | 2            | 3.9005 | 0.3836 |
| KNYNWAITR                           | 1166.3             | 2            | 2.63   | 0.2534 |
| KNYVEDIPFLSPTFNPQEVFIR              | 2655.0             | 3            | 4.0568 | 0.1649 |
| KPAAAAAPGTAEK                       | 1183.3             | 2            | 3.6774 | 0.3114 |
| KPAAAAGAK                           | 784.9              | 1            | 3.1634 | 0.1676 |
| KPAAATVTK                           | 887.1              | 1            | 2.6714 | 0.3109 |
| KPAAATVTKK                          | 1015.2             | 2            | 3.4365 | 0.3151 |
| KPAAGLSAAPVPTAPAAGAPLMDFGNDFVPPAPR  | 3273.8             | 3            | 5.6232 | 0.4219 |
| KPAAVLKPSDWEK                       | 1469.7             | 2            | 3.973  | 0.4084 |
| KPADLQNLAPGTHPPFITFNSEVK            | 2623.0             | 3            | 3.2268 | 0.1424 |
| KPAEDEWGKTPDAMK                     | 1703.9             | 3            | 4.6148 | 0.3605 |
| KPALGFYDTSEENYQALDADFRK             | 2679.9             | 3            | 5.142  | 0.4003 |
| KPALTAIEGTAHGEPCHFPFLFLDKEYDECTSDGR | 3897.3             | 3            | 3.3658 | 0.1885 |
| KPALVAK                             | 726.9              | 1            | 2.106  | 0.1392 |
| KPANDITSQLEINFGDLGR                 | 2089.3             | 2            | 4.1173 | 0.4757 |
| KPATAAGTKK                          | 973.2              | 2            | 3.0315 | 0.3527 |
| KPATSYVR                            | 922.1              | 1            | 2.0458 | 0.2541 |
| KPDPNIKNNAAASEGVLASFFNSLLSK         | 2763.1             | 3            | 4.5785 | 0.3951 |
| KPDQHFKPYLK                         | 1401.6             | 2            | 3.6858 | 0.1616 |
| KPDSMVTNSSTENEA                     | 1610.7             | 2            | 4.4824 | 0.3421 |
| KPDTIEVQQMK                         | 1317.5             | 2            | 3.7808 | 0.2735 |
| KPEASHSFENR                         | 1302.4             | 2            | 3.0688 | 0.2618 |
| KPEDWDEEMDGEWEPPVIQNPEYK            | 2962.1             | 3            | 4.6052 | 0.3839 |
| KPEDWDERPK                          | 1300.4             | 2            | 3.5983 | 0.2412 |
| KPEEDSSSNQSPAATK                    | 1676.7             | 2            | 4.759  | 0.434  |
| KPEEDSSSNQSPAATKGGPLGPGAPPPLLLFNK   | 3400.8             | 3            | 5.7796 | 0.4013 |
| KPEEESPRKDDAK                       | 1529.6             | 2            | 2.785  | 0.1417 |
| KPEENPASK                           | 1000.1             | 2            | 2.7807 | 0.1353 |
| KPEHELFLVYGK                        | 1460.7             | 2            | 3.4096 | 0.266  |
| KPESNAVTK                           | 974.1              | 2            | 2.8198 | 0.227  |



| Peptide Sequence                | Peptide mass (m/z) | Charge State | Xcorr  | DelCn2 |
|---------------------------------|--------------------|--------------|--------|--------|
| KPFNRPQGVQPK                    | 1396.6             | 2            | 2.9149 | 0.1098 |
| KPFPDFVYK                       | 1141.3             | 2            | 2.7271 | 0.1875 |
| KPFPDFVYKR                      | 1297.5             | 3            | 3.998  | 0.3813 |
| KPFPINHGETSDETLLEDAIEVCK        | 2687.0             | 3            | 4.6242 | 0.3859 |
| KPFPINHGETSDETLLEDAIEVCKK       | 2815.1             | 3            | 4.3666 | 0.2332 |
| KPFPLVKPLPGEEPLFTIPHTQEAFR      | 2990.5             | 3            | 5.6986 | 0.4021 |
| KPFSEDVNWGYEK                   | 1599.7             | 2            | 3.1057 | 0.2253 |
| KPFSIEDVEVAPPK                  | 1556.8             | 2            | 2.8395 | 0.1669 |
| KPFSIEDVEVAPPKAYEVR             | 2175.5             | 3            | 3.2853 | 0.1101 |
| KPFSIEEVEVAPPKAHEVR             | 2163.5             | 3            | 5.2982 | 0.4548 |
| KPGGEREER                       | 1058.1             | 2            | 2.6454 | 0.178  |
| KPGGFDISLFYR                    | 1400.6             | 2            | 2.8753 | 0.2347 |
| KPGGFDLSLFYR                    | 1400.6             | 2            | 3.3931 | 0.3449 |
| KPGINVASDWSIHLR                 | 1693.9             | 3            | 4.0319 | 0.3024 |
| KPGMFFNPEESELDTYGNR             | 2345.6             | 3            | 3.8155 | 0.1919 |
| KPGQSFQEQVEHYR                  | 1733.9             | 3            | 4.7191 | 0.434  |
| KPGSVVAAAAAEAK                  | 1270.5             | 2            | 3.3294 | 0.2687 |
| KPGVIDKFTSDTKPIINK              | 2002.3             | 3            | 4.8923 | 0.4045 |
| KPGYHAPVALLNDIPQSTEQYDPFAEHRPPK | 3517.9             | 3            | 6.0383 | 0.4111 |
| KPHIIIATPGR                     | 1203.5             | 2            | 2.745  | 0.2136 |
| KPHIYYGSLEEK                    | 1464.6             | 2            | 2.8279 | 0.2202 |
| KPHTESLELQVR                    | 1437.6             | 3            | 4.2919 | 0.3979 |
| KPHVVTVAGENR                    | 1307.5             | 2            | 2.8239 | 0.3124 |
| KPIDYTILDDIGHGVK                | 1785.0             | 3            | 4.3865 | 0.3959 |
| KPIDYTVLDDVGHGVK                | 1757.0             | 2            | 4.9709 | 0.4977 |
| KPIEDPANDTVDFPKR                | 1843.0             | 3            | 4.3798 | 0.4408 |
| KPIPDEHLILK                     | 1303.6             | 2            | 3.5021 | 0.2733 |
| KPISTHTVDFTFNK                  | 1635.8             | 2            | 4.0139 | 0.3174 |
| KPITDDDVR                       | 1174.2             | 2            | 3.3436 | 0.3288 |
| KPKEDEVEASEK                    | 1389.5             | 2            | 2.9152 | 0.1619 |
| KPKPNPNLLFSDVYQEMPAQLR          | 2587.0             | 3            | 4.5655 | 0.4549 |
| KPKPNPNLLFSDVYQEMPAQLRK         | 2715.2             | 3            | 6.0814 | 0.5087 |
| KPLEALYGYDYFAR                  | 1706.9             | 2            | 2.9708 | 0.2227 |
| KPLKPCACPETK                    | 1418.8             | 2            | 2.6949 | 0.118  |
| KPLLEMNDPELLKETTEAR             | 2228.6             | 3            | 3.7372 | 0.2371 |
| KPLLPTYPGSDVAGVIEAVGDNASAFK     | 2718.1             | 2            | 4.8295 | 0.5062 |

| Peptide Sequence                   | Peptide mass (m/z) | Charge State | Xcorr  | DelCn2 |
|------------------------------------|--------------------|--------------|--------|--------|
| KPLLPTPGSDVAGVIEAVGDNASAFKK        | 2846.2             | 3            | 5.7507 | 0.4655 |
| KPLLPTPGSDVAGVIEAVGDNASAFKKGDR     | 3174.6             | 3            | 3.5626 | 0.2183 |
| KPLPDHVSIVEPK                      | 1459.7             | 3            | 4.3939 | 0.3441 |
| KPLTSSSAAPQRPISTQR                 | 1926.2             | 2            | 4.3971 | 0.4482 |
| KPLVIAEDVDGEALSTLVLR               | 2366.7             | 2            | 7.0155 | 0.5657 |
| KPLVLCGDLNVAHEEIDLR                | 2135.5             | 3            | 4.3063 | 0.257  |
| KPLVLCGDLNVAHEEIDLRNPK             | 2474.9             | 3            | 4.6195 | 0.3488 |
| KPMSLASGLVPAAPPK                   | 1564.9             | 2            | 2.5291 | 0.1834 |
| KPMVLGHEASGTVEK                    | 1583.8             | 2            | 4.2406 | 0.399  |
| KPMVVLGSSALQR                      | 1386.7             | 2            | 3.5648 | 0.2703 |
| KPNEGADGQWK                        | 1230.3             | 2            | 3.458  | 0.2105 |
| KPNIINFDTSLPTSHTYLGADMEEFHGR       | 3192.5             | 3            | 5.1519 | 0.4103 |
| KPNTVSTSHSGSFAPNNPDLAK             | 2270.4             | 3            | 4.226  | 0.3733 |
| KPNVAEAGEQFGQLGR                   | 1701.9             | 2            | 2.9068 | 0.1503 |
| KPPARPSAAAAAIAVAAEEER              | 2148.4             | 3            | 3.631  | 0.1814 |
| KPPLAQKPSVAPR                      | 1389.7             | 2            | 3.4033 | 0.4336 |
| KPPLLNNADSVQAK                     | 1495.7             | 2            | 4.8032 | 0.3855 |
| KPPMDEKSLEEAR                      | 1530.7             | 2            | 3.5242 | 0.3194 |
| KPPMDEKSLEESR                      | 1546.7             | 2            | 3.6796 | 0.2102 |
| KPPMLQPLALPPGLSVHQALER             | 2393.9             | 3            | 3.9511 | 0.1908 |
| KPPPSKEELLK                        | 1266.5             | 2            | 2.9133 | 0.1541 |
| KPPPSKEELLKLTETVVTEYLNSGNANEAVNGVR | 3699.1             | 3            | 3.2655 | 0.2417 |
| KPPSPQPTTEEDPEHR                   | 1842.0             | 3            | 3.4683 | 0.2067 |
| KPPVPALPSKLPFTGAPQLVLDK            | 2641.1             | 3            | 4.0907 | 0.275  |
| KPPRPGAPGHLGSLASLSSPADSYNEGVK      | 2891.2             | 3            | 4.9883 | 0.2876 |
| KPPTDEELKETIKK                     | 1656.9             | 2            | 2.9944 | 0.2611 |
| KPPTFGDASVIALELLNSGYEFDEGSIIFNK    | 3373.8             | 3            | 3.3289 | 0.2113 |
| KPPTGPLPPSKEPLKEK                  | 1844.2             | 3            | 3.2558 | 0.3061 |
| KPQAEKVDVIAGSSK                    | 1557.8             | 2            | 3.6932 | 0.4231 |
| KPQSSSTEPAR                        | 1188.3             | 2            | 2.8543 | 0.1508 |
| KPRPPPALGPEETSASAGLPK              | 2101.4             | 3            | 5.7464 | 0.4355 |
| KPSDGSPDTKPSR                      | 1372.5             | 2            | 4.0652 | 0.3312 |
| KPSGLNGEASK                        | 1088.2             | 2            | 3.1122 | 0.248  |
| KPSHTSAVSIAGK                      | 1283.5             | 2            | 3.8983 | 0.2818 |
| KPSISITTESLK                       | 1304.5             | 2            | 3.3468 | 0.1898 |
| KPTAIKTEGKPAEVK                    | 1597.9             | 2            | 4.4678 | 0.3259 |

| Peptide Sequence              | Peptide mass (m/z) | Charge State | Xcorr  | DelCn2 |
|-------------------------------|--------------------|--------------|--------|--------|
| KPTFMDEEVQSILTK               | 1767.0             | 2            | 2.5812 | 0.2124 |
| KPTLDKSPETFVK                 | 1587.8             | 2            | 3.8079 | 0.2857 |
| KPTSAKPSSTTPR                 | 1358.5             | 2            | 3.6627 | 0.3329 |
| KPTTEEKKPAA                   | 1200.4             | 2            | 3.0282 | 0.231  |
| KPTVTLTYGSSRPSIEIYRPPASR      | 2678.0             | 3            | 3.748  | 0.1759 |
| KPVAGALDVSNK                  | 1346.6             | 2            | 4.7574 | 0.3396 |
| KPVEELTEEEKYVR                | 1749.9             | 2            | 4.3487 | 0.3925 |
| KPVIAAVNGYAFGGGCELAMMCDIYAGEK | 3093.7             | 3            | 5.3373 | 0.3421 |
| KPVIVFVPSR                    | 1142.4             | 2            | 2.5072 | 0.2151 |
| KPVIVFVPSRK                   | 1270.6             | 2            | 3.0581 | 0.2665 |
| KPVS RPATAAAAAAGSR            | 1582.8             | 2            | 2.6238 | 0.292  |
| KPVTVHSR                      | 924.1              | 2            | 2.4967 | 0.2345 |
| KPVTVSPTTPTSPTEGEAS           | 1887.0             | 2            | 4.9027 | 0.4946 |
| KPWLAYPHYKPPEK                | 1755.1             | 3            | 4.0491 | 0.2975 |
| KPYPDENLVEVK                  | 1546.7             | 2            | 4.3801 | 0.3391 |
| KPYTMDPDHR                    | 1260.4             | 2            | 2.4252 | 0.1728 |
| KQAESASEAAK                   | 1120.2             | 2            | 2.926  | 0.2613 |
| KQAESASEAAKK                  | 1248.4             | 2            | 2.9505 | 0.2687 |
| KQAGPASVPLRTEEEFKK            | 2016.3             | 3            | 4.6495 | 0.3756 |
| KQALAEHEDELPEHFKPSQLIK        | 2588.9             | 3            | 5.9472 | 0.3116 |
| KQALQDTLALYK                  | 1392.6             | 2            | 2.5911 | 0.1236 |
| KQAQILASEAEKAEQINQAAGEASAVLAK | 2969.3             | 3            | 6.9248 | 0.5617 |
| KQASAIKKEELVAR                | 1571.8             | 3            | 4.0082 | 0.2988 |
| KQCVDHYNEVK                   | 1363.5             | 2            | 2.9329 | 0.102  |
| KQDAFYKEQLAR                  | 1497.7             | 2            | 4.2298 | 0.2971 |
| KQDASEKDSVPMGSPAFLLSLFDGGTR   | 2855.2             | 3            | 3.6098 | 0.2444 |
| KQDEPIDLFMIEIMEMK             | 2111.5             | 2            | 3.2145 | 0.1716 |
| KQDEWIKFDDDKVSIVTPEDILR       | 2791.1             | 3            | 4.8527 | 0.3664 |
| KQDFDEDDILKELEELSLEAQGIK      | 2807.1             | 3            | 4.7377 | 0.1907 |
| KQDFPLVK                      | 975.2              | 2            | 2.5572 | 0.1132 |
| KQDGFTHILLSTK                 | 1488.7             | 2            | 2.5665 | 0.1856 |
| KQDIENILHWNVTQHK              | 2004.2             | 2            | 5.0686 | 0.3209 |
| KQDIGDILQQIMTITDQSLDEAQR      | 2832.1             | 3            | 4.0915 | 0.2896 |
| KQEDFMTTMDANEEKINAVVETGR      | 2758.0             | 3            | 3.3135 | 0.1719 |
| KQEEELTKR                     | 1161.3             | 2            | 2.7327 | 0.1119 |
| KQEELQQLEQQR                  | 1557.7             | 2            | 3.2618 | 0.1574 |

| Peptide Sequence               | Peptide mass (m/z) | Charge State | Xcorr  | DelCn2 |
|--------------------------------|--------------------|--------------|--------|--------|
| KQEEQMETEQQNKDEGKKPEVK         | 2661.9             | 3            | 4.6973 | 0.2345 |
| KQEESVQKQEAMR                  | 1591.8             | 2            | 3.5743 | 0.2252 |
| KQEIEKPVAVSELTTLPIVQGK         | 2556.0             | 3            | 4.1454 | 0.321  |
| KQEIIKTTEQLIEAVNNGDFEAYAK      | 2854.2             | 3            | 5.0594 | 0.2637 |
| KQEIIKVTEQLIEAINNGDFEAYTK      | 2896.2             | 3            | 4.1708 | 0.3261 |
| KQELEEICHDLER                  | 1713.9             | 2            | 4.8596 | 0.2976 |
| KQELEEICHDLERVEEEEEERCQHLQAEK  | 3552.9             | 3            | 3.8144 | 0.1498 |
| KQELEEILHDLESR                 | 1739.9             | 3            | 5.4013 | 0.3826 |
| KQELEEILHDLESRVEEEEEERNQILQNEK | 3608.9             | 3            | 4.0847 | 0.1783 |
| KQELELVVSELEAR                 | 1643.9             | 3            | 4.9507 | 0.3757 |
| KQELLEALTK                     | 1173.4             | 2            | 2.7329 | 0.1736 |
| KQELLEALTKHFQD                 | 1700.9             | 3            | 4.2478 | 0.3584 |
| KQELQPGTAYK                    | 1263.4             | 2            | 3.5266 | 0.1582 |
| KQEQANPFYIK                    | 1480.6             | 2            | 3.0325 | 0.1174 |
| KQEQLLETAR                     | 1103.2             | 2            | 2.627  | 0.1111 |
| KQEVQAWDGEVR                   | 1445.6             | 2            | 3.6826 | 0.1857 |
| KQEWTAIIPNSQLIVIPYPHNVPR       | 2815.3             | 3            | 6.1068 | 0.3493 |
| KQEYLEVQR                      | 1193.3             | 2            | 2.5265 | 0.1145 |
| KQFEAPTLAEGFSAILEIPFR          | 2365.7             | 2            | 2.824  | 0.1393 |
| KQFGAQANVIGPWQTK               | 1887.2             | 2            | 4.3271 | 0.2971 |
| KQFGHPQIEAR                    | 1311.5             | 2            | 2.5316 | 0.3231 |
| KQGDGGKDLPTAEAKK               | 1572.7             | 2            | 2.8849 | 0.2445 |
| KQGDHYILNGSK                   | 1360.5             | 2            | 3.0574 | 0.1306 |
| KQGEDNSTAQDTEELEKEIREDLPVNTSK  | 3305.5             | 3            | 4.612  | 0.1827 |
| KQGEVSKAASADSTTEGTPADGFTVLSTK  | 2885.1             | 3            | 6.5418 | 0.4449 |
| KQGGLGPMNIPLVSDPK              | 1752.1             | 2            | 3.6729 | 0.3217 |
| KQGGLGPMNIPLVSDPKR             | 1908.3             | 3            | 5.6698 | 0.4881 |
| KQGKQEAADAALR                  | 1386.5             | 2            | 3.2234 | 0.2266 |
| KQHLEIELK                      | 1138.3             | 2            | 2.4952 | 0.115  |
| KQHPYTFPGGSGTVFAR              | 1851.1             | 3            | 3.5983 | 0.166  |
| KQHYYLAGASGSPGEEVAIRPSTAPR     | 2680.0             | 3            | 5.1655 | 0.3861 |
| KQIEELKGQEVSPK                 | 1613.8             | 2            | 5.5968 | 0.3402 |
| KQIQFADDMQEFTK                 | 1729.9             | 2            | 4.7274 | 0.3591 |
| KQIQFADDMQEFTKFPTK             | 2203.5             | 3            | 4.8252 | 0.403  |
| KQITMEELVR                     | 1247.5             | 2            | 2.8767 | 0.1313 |
| KQIVAGVNYFLDVELGR              | 1922.2             | 2            | 2.618  | 0.1573 |

| Peptide Sequence                         | Peptide mass (m/z) | Charge State | Xcorr  | DelCn2 |
|------------------------------------------|--------------------|--------------|--------|--------|
| KQKPQEVQENGMEDPSISFSKPK                  | 2730.0             | 3            | 4.5721 | 0.3043 |
| KQKPVLEEQVIKESDASKIPGK                   | 2452.8             | 3            | 3.5616 | 0.2661 |
| KQKTEDEVLTSK                             | 1406.6             | 2            | 3.3245 | 0.2384 |
| KQKVEGTEPTTAFNLFVGNLNFNK                 | 2698.0             | 3            | 6.0673 | 0.526  |
| KQLADETLLK                               | 1159.4             | 2            | 2.8472 | 0.1748 |
| KQLADETLLKVDLENR                         | 1886.1             | 3            | 4.49   | 0.3224 |
| KQLIEPVQYDEQGMAFSK                       | 2112.4             | 3            | 4.0202 | 0.2692 |
| KQLKLMEDMDTVIKPRPQVVK                    | 2498.0             | 2            | 2.4596 | 0.1646 |
| KQLLHLAEEK                               | 1209.4             | 2            | 2.9059 | 0.1724 |
| KQLQAIEFNK                               | 1219.4             | 2            | 2.7432 | 0.1155 |
| KQLQDEMLR                                | 1161.4             | 2            | 3.0995 | 0.2032 |
| KQMADTGKLNLTLLQR                         | 1718.0             | 2            | 3.8784 | 0.322  |
| KQMVIDVLHPGK                             | 1365.7             | 3            | 4.4898 | 0.3653 |
| KQNAPMTLEEFRK                            | 1592.8             | 3            | 4.0625 | 0.2276 |
| KQNDVFGAEQ                               | 1265.3             | 2            | 3.5498 | 0.2775 |
| KQNMILSDEAIK                             | 1390.6             | 2            | 3.7717 | 0.2691 |
| KQNNFSLAMK                               | 1181.4             | 2            | 2.9643 | 0.1421 |
| KQNVQDQALLNGLELLK                        | 1797.1             | 2            | 2.7545 | 0.2302 |
| KQNVVPTVLALGSDVDMVLTTLTSLGDR             | 2958.4             | 3            | 5.2658 | 0.5068 |
| KQPALDVLYDVMK                            | 1520.8             | 2            | 2.8195 | 0.2966 |
| KQPPKEPSEVPTPK                           | 1562.8             | 3            | 3.4899 | 0.3029 |
| KQPPVSPGTALVGSQK                         | 1594.8             | 2            | 3.2254 | 0.4099 |
| KQPPVSPGTALVGSQKEPSEVPTPK                | 2559.9             | 3            | 4.5916 | 0.3926 |
| KQQDVLGFLEANK                            | 1490.7             | 2            | 4.1654 | 0.2189 |
| KQQHNLSAFP                               | 1298.5             | 2            | 2.606  | 0.1146 |
| KQQISLATQMVR                             | 1403.7             | 2            | 2.9968 | 0.1009 |
| KQQMAEEMVEAAGEDERELAAEMAAFLNENLPESIFGAPK | 4468.0             | 3            | 6.0448 | 0.3651 |
| KQQNQELQEQLR                             | 1542.7             | 2            | 4.3429 | 0.1876 |
| KQQSIAGSADSKPIDVSR                       | 1888.1             | 2            | 4.8712 | 0.4717 |
| KQQTLEAEEAK                              | 1275.4             | 2            | 3.6822 | 0.2335 |
| KQQTTPQKPR                               | 1311.5             | 2            | 2.9355 | 0.1822 |
| KQSEGLTKEYDR                             | 1454.6             | 2            | 3.5083 | 0.3167 |
| KQSEGLTKEYDRLLLEHAK                      | 2275.5             | 2            | 4.4948 | 0.3835 |
| KQSKPVTTPEEIAQVATISANGDKEIGNIISDAMK      | 3686.1             | 3            | 6.8223 | 0.489  |
| KQSKPVTTPEEIAQVATISANGDKEIGNIISDAMKK     | 3814.3             | 3            | 3.8826 | 0.3649 |
| KQSLGELIGTLNAAK                          | 1543.8             | 2            | 5.2579 | 0.3969 |

| Peptide Sequence                    | Peptide mass (m/z) | Charge State | Xcorr  | DelCn2 |
|-------------------------------------|--------------------|--------------|--------|--------|
| KQSLGELIGTLNAAKVPADTEVVCAPPTAYIDFAR | 3661.2             | 3            | 4.3889 | 0.2692 |
| KQSNPLLIHVDTK                       | 1493.7             | 2            | 3.9411 | 0.3664 |
| KQSTDEEVTSLAK                       | 1436.5             | 2            | 3.9602 | 0.3709 |
| KQSVEDILKDHWWQK                     | 1755.0             | 2            | 4.2078 | 0.3369 |
| KQTALVELVK                          | 1129.4             | 2            | 3.0259 | 0.2237 |
| KQTDFEHR                            | 1061.1             | 2            | 2.6688 | 0.1972 |
| KQTIDNSQGAYQEAFDISK                 | 2144.3             | 2            | 5.7115 | 0.5006 |
| KQTIDNSQGAYQEAFDISKK                | 2272.5             | 2            | 6.3144 | 0.4847 |
| KQVAVAELLENVGVNEHDGGAQPGPVPK        | 2982.3             | 3            | 6.1748 | 0.4462 |
| KQVEILNRYPHFK                       | 1673.0             | 2            | 4.9128 | 0.3971 |
| KQVEVFRQNLFQEAEFLYR                 | 2574.9             | 3            | 4.1114 | 0.2611 |
| KQVTPLFIHFR                         | 1386.7             | 3            | 3.8102 | 0.2857 |
| KRDEEEEEASGLKEELIPEKLER             | 2758.0             | 3            | 3.8684 | 0.2277 |
| KRDHANYEEDENGDIPIK                  | 2245.3             | 3            | 3.6889 | 0.1947 |
| KREDAITQQNTIQNEAVNLLDPGSSYLLQEPPR   | 3740.1             | 3            | 5.6955 | 0.405  |
| KREDSAPPSSVAR                       | 1400.5             | 2            | 2.4435 | 0.1254 |
| KREEAAAVPAAAPDDLALLK                | 2050.3             | 2            | 5.2183 | 0.3673 |
| KREEAAAVPAAAPDDLALLKNLR             | 2433.8             | 3            | 3.6794 | 0.1803 |
| KREEILEEIAK                         | 1358.6             | 2            | 2.7501 | 0.1417 |
| KREEILEEIAKVTGVLDVIVYASAADKMK       | 3349.9             | 3            | 4.3326 | 0.2073 |
| KREGELTVAQGR                        | 1344.5             | 2            | 3.7164 | 0.1735 |
| KRELFSNLQEFAGPSGK                   | 1909.1             | 3            | 4.431  | 0.345  |
| KREPLNFGIPDGSTGFSSR                 | 2066.3             | 2            | 3.4193 | 0.2075 |
| KREQSNDIAR                          | 1217.3             | 2            | 2.6969 | 0.1553 |
| KRETEDVPKDK                         | 1345.5             | 2            | 2.4365 | 0.1435 |
| KREYENELAK                          | 1280.4             | 2            | 3.1513 | 0.1839 |
| KRGFGFVTFDDHDPVDKIVLQK              | 2562.9             | 3            | 3.8967 | 0.3436 |
| KRGWDENVYYTVPLVR                    | 1996.3             | 2            | 3.6718 | 0.4356 |
| KRHQDMFQDLNRKLQHAAEKDK              | 2738.1             | 3            | 3.6431 | 0.1546 |
| KRIEPLSPELVAAASAVADSLPFDK           | 2626.0             | 3            | 4.2006 | 0.3866 |
| KRIEPLSPELVAAASAVADSLPFDKQTTK       | 3084.5             | 3            | 3.6987 | 0.1502 |
| KRIGATQTSTASLKR                     | 1618.9             | 2            | 2.7757 | 0.1629 |
| KRKMSGGSTMSSGGGNTNNSNSKK            | 2416.6             | 3            | 3.6351 | 0.1453 |
| KRLDKFNEVVSVLK                      | 1676.0             | 2            | 3.2939 | 0.2571 |
| KRLDQVEQELNELR                      | 1771.0             | 2            | 2.8545 | 0.1443 |
| KRLDQVEQELNELRETEGGTVLTATTSELEAINKR | 3973.4             | 3            | 3.701  | 0.2211 |

| Peptide Sequence                        | Peptide mass (m/z) | Charge State | Xcorr  | DelCn2 |
|-----------------------------------------|--------------------|--------------|--------|--------|
| KRLEAFLTQK                              | 1234.5             | 2            | 2.9847 | 0.2165 |
| KRLEEAPLVTK                             | 1284.5             | 2            | 2.867  | 0.2438 |
| KRLEEPEEPKVLTPEEQLADKLR                 | 2749.1             | 3            | 5.1237 | 0.4129 |
| KRNEDEDSPNK                             | 1332.4             | 2            | 3.6029 | 0.2645 |
| KRNEDEDSPNKLYTLVTVYVPVTTFK              | 2959.3             | 3            | 5.3799 | 0.5023 |
| KRPAPQQIQQVQQQAVQNR                     | 2246.5             | 3            | 5.629  | 0.3908 |
| KRPASMAVMEGDLVKK                        | 1761.1             | 3            | 3.6103 | 0.2107 |
| KRPEQQDVSSPAK                           | 1470.6             | 2            | 3.2571 | 0.2502 |
| KRPETKPSSDLETSK                         | 1703.9             | 2            | 3.6949 | 0.368  |
| KRPETVATQFK                             | 1305.5             | 2            | 3.5463 | 0.334  |
| KRPLIVFDGSSTSTSIK                       | 1837.1             | 3            | 4.2789 | 0.3767 |
| KRPSWFTQN                               | 1164.3             | 2            | 2.4776 | 0.2213 |
| KRPVGDPFDVKTEQGPQIDQK                   | 2383.6             | 3            | 3.9462 | 0.3303 |
| KRPYDSDNLQHEELLMK                       | 2117.4             | 3            | 3.7726 | 0.2696 |
| KRTEEPDRDER                             | 1431.5             | 2            | 2.8389 | 0.1055 |
| KRVDELQQQVK                             | 1371.6             | 2            | 3.6935 | 0.1566 |
| KRVEGPGSLGLEESGSR                       | 1758.9             | 2            | 3.291  | 0.2381 |
| KRVEISAPSNFEHR                          | 1670.9             | 2            | 2.8819 | 0.133  |
| KSADTLWGIQK                             | 1247.4             | 2            | 3.2305 | 0.2126 |
| KSADTLWGIQKELQF                         | 1765.0             | 2            | 3.6907 | 0.3389 |
| KSAEFLHMLK                              | 1317.6             | 2            | 4.4431 | 0.297  |
| KSAEIDSDDTGGSAQK                        | 1680.7             | 2            | 4.164  | 0.3373 |
| KSAGGGPSR                               | 816.9              | 2            | 2.7392 | 0.1614 |
| KSATQFTGR                               | 996.1              | 2            | 2.5867 | 0.2585 |
| KSAVADKHELLSLASSNHLGK                   | 2206.5             | 3            | 5.488  | 0.3873 |
| KSDANASYLR                              | 1125.2             | 1            | 2.0167 | 0.1175 |
| KSDGIYIINLK                             | 1264.5             | 2            | 3.6276 | 0.2354 |
| KSDGKIDVSIEAASGGK                       | 1662.8             | 2            | 2.4811 | 0.2357 |
| KSDIDEIVLVGGSTR                         | 1589.8             | 2            | 5.2598 | 0.4079 |
| KSDIPEKPK                               | 1042.2             | 2            | 2.4379 | 0.1973 |
| KSDLIEIELLKR                            | 1344.6             | 2            | 3.1919 | 0.2439 |
| KSDLFQDDLYPDTAGPEAALEAEWFEFGK           | 3273.5             | 3            | 5.2047 | 0.4273 |
| KSDLFQDDLYPDTAGPEAALEAEWFEFGKNADPILISLK | 4338.7             | 3            | 3.6533 | 0.1707 |
| KSDLFQDDLYPDTAGPEAALEAEWVSGR            | 3211.4             | 3            | 6.1153 | 0.5627 |
| KSDLFQDDLYPDTAGPEAALEAEWVSGRDADPILISLR  | 4305.7             | 3            | 3.733  | 0.1823 |
| KSDLHPTLPAGR                            | 1292.5             | 2            | 3.6033 | 0.2639 |

| Peptide Sequence                     | Peptide mass (m/z) | Charge State | Xcorr  | DelCn2 |
|--------------------------------------|--------------------|--------------|--------|--------|
| KSDVEAIFSK                           | 1124.3             | 2            | 2.8588 | 0.2294 |
| KSDVEAIFSKY GK                       | 1472.7             | 3            | 4.2887 | 0.3553 |
| KSDVETIFSK                           | 1154.3             | 2            | 3.2067 | 0.2489 |
| KSEAAVPPWVDTNDEETIQQILALSADKR        | 3354.7             | 3            | 4.1511 | 0.35   |
| KSEAPSGESR                           | 1048.1             | 2            | 2.4324 | 0.1506 |
| KSEASSEFAK                           | 1084.2             | 2            | 2.541  | 0.2256 |
| KSEDDEK LK                           | 1092.2             | 2            | 2.87   | 0.1332 |
| KSEDDSAVPLAK                         | 1260.4             | 2            | 3.9836 | 0.3583 |
| KSEEEIDFLR                           | 1266.4             | 2            | 3.0918 | 0.2936 |
| KSEESAAPSR                           | 1062.1             | 2            | 2.5153 | 0.2029 |
| KSEHLSVRPQTALEENETQKEVPQDQHLEAPADQSK | 4099.4             | 3            | 4.4178 | 0.2236 |
| KSEIEYYAMLAK                         | 1446.7             | 2            | 4.5284 | 0.294  |
| KSEIQTLKEEIEQSLTKR                   | 2161.4             | 3            | 4.453  | 0.3465 |
| KSEMESVLAQLDNYGQQELADLFVNYNVK        | 3347.7             | 3            | 4.6322 | 0.4258 |
| KSEQLHNVTA FQ GK                     | 1587.8             | 2            | 3.7256 | 0.3596 |
| KSESEVEEAAAIIAQRPDNPR                | 2311.5             | 2            | 3.6232 | 0.3442 |
| KSEVNDKNHEMEEIRK                     | 1987.2             | 3            | 3.2771 | 0.1007 |
| KSFTPDHV VYAR                        | 1420.6             | 2            | 3.2758 | 0.3815 |
| KSGAAAAAVTTETAQHAQGAKPQVQPQK         | 2776.1             | 3            | 7.8993 | 0.4388 |
| KSGAAAAAVTTETAQHAQGAKPQVQPQKR        | 2932.2             | 3            | 6.2876 | 0.4417 |
| KSGEKPLLGGSLMEYAILS AIAAMNEPK        | 2920.4             | 3            | 3.8691 | 0.3015 |
| KSGKDFVTEALQSR                       | 1566.7             | 2            | 4.4888 | 0.3725 |
| KSGKPGPFLLSGSR                       | 1431.7             | 2            | 2.4605 | 0.1086 |
| KSGKPPLQNNEK                         | 1340.5             | 2            | 2.8125 | 0.3047 |
| KSGSFHSSG EK                         | 1151.2             | 2            | 2.8023 | 0.2747 |
| KSGVGNIFIK                           | 1063.3             | 2            | 2.6856 | 0.2604 |
| KSHEAEVLK                            | 1041.2             | 2            | 2.4593 | 0.3255 |
| KSISHYHETLGEALQGVELEFSGLDIK          | 3002.3             | 3            | 4.3607 | 0.3741 |
| KSLAAAAGKQELAK                       | 1386.6             | 2            | 4.7718 | 0.3182 |
| KSLDQDPVVR                           | 1157.3             | 2            | 2.7849 | 0.1458 |
| KSLEGDLEDLKDQIAQLEASLAAK             | 2658.0             | 3            | 3.8448 | 0.1498 |
| KSLEMLELGLSEAQVMMALS NHLNAVESEK      | 3303.8             | 3            | 3.8953 | 0.1729 |
| KSLETEHKALTSEIALLQSR                 | 2255.6             | 3            | 4.2876 | 0.2609 |
| KSLPEEDVAEIQHAEEFLIKPESK             | 2768.1             | 3            | 5.5644 | 0.4571 |
| KSLSDSESDDSK                         | 1298.3             | 2            | 3.3564 | 0.3007 |
| KSLTPAVPVESKPKPSGK                   | 1966.3             | 2            | 3.9045 | 0.3754 |



| Peptide Sequence           | Peptide mass (m/z) | Charge State | Xcorr  | DelCn2 |
|----------------------------|--------------------|--------------|--------|--------|
| KSNAHYNLQNAFNLAEQHLGLTK    | 2612.9             | 3            | 6.8214 | 0.4554 |
| KSNFAEALAAHK               | 1287.4             | 2            | 3.7694 | 0.3471 |
| KSNFSLEDFQHSK              | 1567.7             | 2            | 3.8123 | 0.384  |
| KSNVKPNSGELDPLYVVEVLLR     | 2470.8             | 3            | 3.6719 | 0.1346 |
| KSNVSYKNPSLMPK             | 1593.9             | 2            | 2.8133 | 0.1153 |
| KSPDSVAATLKK               | 1360.5             | 2            | 2.783  | 0.1567 |
| KSPENTEGKDGSK              | 1377.4             | 2            | 2.5254 | 0.1298 |
| KSPSDTEGLVK                | 1161.3             | 2            | 2.4093 | 0.1142 |
| KSPVAKDVDLEFLAK            | 1660.9             | 2            | 4.5627 | 0.4728 |
| KSQAQAQVHLQEVK             | 1594.8             | 2            | 4.5312 | 0.3434 |
| KSQEKPREIMDAAEDYAK         | 2110.3             | 2            | 3.0709 | 0.3112 |
| KSQGPLEVAAAVSQSSGLAAK      | 2129.4             | 2            | 5.8398 | 0.5006 |
| KSQIFSTASDNQPTVTIK         | 1966.2             | 2            | 5.3692 | 0.4841 |
| KSQTTGFPSLITIFSAPNYLDVYNNK | 2920.3             | 3            | 3.9194 | 0.2977 |
| KSRPSSTSSASALYGQPLLLSVPK   | 2475.8             | 3            | 3.3208 | 0.1824 |
| KSSDSKPGVSSK               | 1207.3             | 2            | 3.2897 | 0.1894 |
| KSSKGELTTLIHQLQEK          | 1941.2             | 2            | 3.0765 | 0.1652 |
| KSSTPEEVK                  | 1005.1             | 2            | 2.7321 | 0.1963 |
| KSSTPEEVKK                 | 1133.3             | 2            | 3.7386 | 0.1935 |
| KSTAALEEDAQILK             | 1517.7             | 2            | 3.6846 | 0.2672 |
| KSTDHPKYSDMIVAAIQAEK       | 2233.5             | 3            | 5.6636 | 0.496  |
| KSTLRDQINSDHR              | 1570.7             | 2            | 2.4755 | 0.1184 |
| KSTPKEETVNDPEEAGHR         | 2025.1             | 2            | 4.5337 | 0.3586 |
| KSTVLQQQYNR                | 1365.5             | 2            | 3.3981 | 0.2382 |
| KSVEEGKIDGIIDK             | 1531.7             | 2            | 3.2455 | 0.1238 |
| KSVEVNFTESLLR              | 1522.7             | 2            | 2.4959 | 0.1244 |
| KSVFEEEVK                  | 1123.2             | 2            | 2.6793 | 0.1691 |
| KSVPSTGGVK                 | 960.1              | 2            | 2.8725 | 0.1925 |
| KSVQPTSEER                 | 1161.2             | 2            | 3.0718 | 0.1351 |
| KSVQYDDVPEYKDR             | 1742.9             | 3            | 3.3398 | 0.2092 |
| KTAAELLQSQGSQAGGSQTLKR     | 2260.5             | 3            | 6.9039 | 0.5138 |
| KTAEAGGVTK                 | 1019.1             | 2            | 2.5511 | 0.1811 |
| KTANDMIHAENMR              | 1531.7             | 2            | 4.7559 | 0.4461 |
| KTASVLSKDDVAPESGDTTVKKPESK | 2719.0             | 3            | 6.9916 | 0.4063 |
| KTCESDTLEALLLTASERP KPLLFK | 2805.3             | 3            | 3.8785 | 0.2906 |
| KTDAPQPDVKEEEEEKEEEK       | 2388.5             | 3            | 4.712  | 0.3924 |

| Peptide Sequence                     | Peptide mass (m/z) | Charge State | Xcorr  | DelCn2 |
|--------------------------------------|--------------------|--------------|--------|--------|
| KTDAPQPDVKEEEEEKEEEKDKGDEEEEGEEKLEEK | 4263.4             | 3            | 5.5122 | 0.3286 |
| KTDDVEAMSSQPALALDER                  | 2077.3             | 2            | 3.413  | 0.3528 |
| KTDFEVDALMVDSQK                      | 1874.1             | 2            | 2.4665 | 0.1472 |
| KTDGYSGADISIIVR                      | 1595.8             | 2            | 2.6644 | 0.2687 |
| KTDIAAFVKEILGEDS                     | 1736.9             | 2            | 3.4805 | 0.3636 |
| KTDKPRQEDKDDLVDVTELTNEDLLDQLVK       | 3415.7             | 3            | 6.1273 | 0.4214 |
| KTEAAATTR                            | 949.0              | 2            | 2.429  | 0.1302 |
| KTEAAATTRKPESNAVTK                   | 1904.1             | 3            | 3.5439 | 0.307  |
| KTEAPAAPAAQETK                       | 1413.6             | 2            | 4.9429 | 0.3844 |
| KTEELEEEESFPER                       | 1623.7             | 2            | 4.0876 | 0.3615 |
| KTEEPPRDFDPALLEFLVCPLSK              | 2646.1             | 3            | 3.5346 | 0.1509 |
| KTEGDLQGDHQQ                         | 1356.4             | 2            | 3.6284 | 0.2223 |
| KTEGKIEELLPGSSIDAETR                 | 2174.4             | 3            | 4.0603 | 0.2603 |
| KTEGTPNQGK                           | 1060.1             | 2            | 2.7006 | 0.165  |
| KTEKEESTEVLK                         | 1421.6             | 2            | 3.2652 | 0.1304 |
| KTEMQEKNPLPSKETIEQEK                 | 2388.7             | 3            | 4.3337 | 0.1838 |
| KTENWLSEWWLK                         | 1620.8             | 2            | 2.9189 | 0.1393 |
| KTEPATGFIDGDLIESFLDISRPK             | 2651.0             | 3            | 6.7105 | 0.4778 |
| KTERDELLKDLQQSIAR                    | 2044.3             | 3            | 5.3193 | 0.3407 |
| KTESASVQGR                           | 1063.1             | 2            | 3.4282 | 0.2384 |
| KTESIDVMDAVGGSNIVVSTR                | 2122.4             | 2            | 4.5859 | 0.3591 |
| KTETQEKNPLPSK                        | 1500.7             | 3            | 4.2291 | 0.2843 |
| KTETQEKNPLPSKETIEQEK                 | 2358.6             | 3            | 5.9338 | 0.4073 |
| KTETQEKNPLPSKETIEQEKQAGES            | 2831.0             | 3            | 5.1085 | 0.4086 |
| KTETQEKNLPTK                         | 1518.7             | 2            | 4.0158 | 0.3414 |
| KTETQEKNLPTKETIEQEK                  | 2376.6             | 3            | 3.8483 | 0.2654 |
| KTETQEKNLPTKETIEQEKR                 | 2532.8             | 3            | 4.8989 | 0.3568 |
| KTETQEKNLPTKETIEQEKRSEIS             | 2949.2             | 3            | 4.5109 | 0.3608 |
| KTETQTTGAENK                         | 1308.4             | 2            | 3.18   | 0.29   |
| KTEVLMENFR                           | 1267.5             | 2            | 2.7109 | 0.1266 |
| KTEVQAHSPPSR                         | 1240.4             | 2            | 2.9718 | 0.1819 |
| KTFDSLIIQDALDGLMLEGENIVSAAR          | 2808.2             | 2            | 3.5984 | 0.3604 |
| KTFNIKNDFTEEEEAQVR                   | 2199.4             | 3            | 3.601  | 0.1715 |
| KTFPTVNPSTGEVICQVAEGDKEDVDK          | 2908.2             | 3            | 5.3315 | 0.3825 |
| KTFPTVNPSTGEVICQVAEGDKEDVDKAVK       | 3206.6             | 3            | 6.8106 | 0.4213 |
| KTFPTVNPTTGEVIGHVAEGDR               | 2326.6             | 3            | 3.7913 | 0.1688 |

| Peptide Sequence                          | Peptide mass (m/z) | Charge State | Xcorr  | DelCn2 |
|-------------------------------------------|--------------------|--------------|--------|--------|
| KTFSHELSDFGLESTAGEIPVVAIR                 | 2705.0             | 3            | 5.7635 | 0.5371 |
| KTFVAGIKEDTEEHHLR                         | 2011.2             | 2            | 4.8561 | 0.2218 |
| KTGEGFYK                                  | 930.0              | 2            | 2.6808 | 0.2956 |
| KTGLSSEQTVNVLAQILKR                       | 2086.4             | 3            | 3.9338 | 0.1835 |
| KTGNQHFQYLYGR                             | 1541.7             | 2            | 4.2853 | 0.3367 |
| KTGQAPGYSYTAANK                           | 1557.7             | 2            | 4.6527 | 0.4029 |
| KTGQPMINLYTDR                             | 1537.8             | 2            | 2.712  | 0.2097 |
| KTGSPGSPGAGGVQSTAK                        | 1587.7             | 2            | 4.435  | 0.4806 |
| KTGSYGALAEITASK                           | 1497.7             | 2            | 2.9391 | 0.3279 |
| KTHDASGQLVLISQELLR                        | 2009.3             | 2            | 2.4362 | 0.2344 |
| KTHIQDNHDGTYTVAYVPDVTGR                   | 2588.8             | 3            | 5.3205 | 0.4386 |
| KTHLYTLILNPDNSFEILVDQSVVNSGNLLNDMTPPVNPSR | 4568.1             | 3            | 5.3865 | 0.4194 |
| KTHQPSDEVGTSIEHPR                         | 1919.0             | 2            | 3.4296 | 0.2782 |
| KTIPIKYPLKEIVVIHQDPEALKDIK                | 3030.6             | 3            | 4.6536 | 0.3914 |
| KTIPSWATLSASQLAR                          | 1731.0             | 2            | 4.3564 | 0.4784 |
| KTISPEHVIQALESLGFGSYISEVK                 | 2734.1             | 3            | 3.7243 | 0.1686 |
| KTKEDEKDDKPIR                             | 1602.8             | 2            | 4.3413 | 0.2948 |
| KTKKPKA AESVSKPDVSEEAPGPSK                | 2596.9             | 3            | 3.7155 | 0.1131 |
| KTKPYIQVDIGGGQTK                          | 1734.0             | 3            | 4.7691 | 0.3529 |
| KTKTENPLILIDEVDKIGR                       | 2183.5             | 3            | 5.1262 | 0.2753 |
| KTLEEAIR                                  | 960.1              | 2            | 2.5293 | 0.1282 |
| KTLEEEAKTHEAQIQEMR                        | 2172.4             | 2            | 6.0254 | 0.4849 |
| KTLGHNLLVSELYNQLK                         | 1971.3             | 3            | 3.7261 | 0.3139 |
| KTLLSNLEEAK                               | 1246.4             | 2            | 4.4591 | 0.2832 |
| KTLLSNLEEAKK                              | 1374.6             | 3            | 4.7685 | 0.3193 |
| KTLNNDIMLIK                               | 1303.6             | 2            | 3.3663 | 0.2708 |
| KTLQALEFHTVPFQLLAR                        | 2113.5             | 2            | 5.8033 | 0.4242 |
| KTLSHNLLVSEVYNQLK                         | 1987.3             | 2            | 4.9002 | 0.4259 |
| KTLTTVQGIADDYDKKK                         | 1925.2             | 2            | 3.9715 | 0.373  |
| KTLVEFPQK                                 | 1090.3             | 2            | 3.002  | 0.2469 |
| KTNHSSPEAQSK                              | 1314.4             | 2            | 2.9803 | 0.3597 |
| KTPESFLGPNAALVDLDSLVS RGP T PPGAK         | 3133.5             | 3            | 4.3551 | 0.2365 |
| KTPPTMEEILKNEK                            | 1658.9             | 2            | 3.55   | 0.2369 |
| KTPQGPPEIYSDTQFPSLQSTAK                   | 2521.8             | 3            | 5.2804 | 0.3507 |
| KTPSKPPAQLSPSPVK                          | 1663.0             | 2            | 3.0505 | 0.2133 |
| KTPVIVTLKENER                             | 1527.8             | 2            | 3.5537 | 0.3995 |

| Peptide Sequence               | Peptide mass (m/z) | Charge State | Xcorr  | DelCn2 |
|--------------------------------|--------------------|--------------|--------|--------|
| KTPWYQ                         | 822.9              | 2            | 2.5602 | 0.1056 |
| KTQDQISNIK                     | 1175.3             | 2            | 2.8884 | 0.1735 |
| KTQEQLALEMAELTAR               | 1833.1             | 2            | 4.6252 | 0.4214 |
| KTQEQLLEVLESLKQELATSQR         | 2459.7             | 3            | 4.9462 | 0.4484 |
| KTQETLSQAGQK                   | 1319.4             | 2            | 4.0896 | 0.3102 |
| KTQHGVLSQQFVELINK              | 1970.3             | 3            | 5.624  | 0.3978 |
| KTQKPVFEER                     | 1262.4             | 2            | 2.7439 | 0.1605 |
| KTQNDVLHAENVK                  | 1496.7             | 2            | 4.7079 | 0.3478 |
| KTQQFFDEMADPDLLEESSLLLEPSEMGR  | 3331.6             | 3            | 4.2285 | 0.3129 |
| KTQVLQPEEK                     | 1200.4             | 2            | 2.9741 | 0.1986 |
| KTSATVGPK                      | 889.0              | 1            | 2.3261 | 0.3174 |
| KTSATVGPKAPSGGK                | 1386.6             | 2            | 4.1001 | 0.287  |
| KTSETLSQAGQK                   | 1278.4             | 2            | 4.219  | 0.3852 |
| KTSFGSLKDEDR                   | 1383.5             | 2            | 3.8131 | 0.3463 |
| KTSFGSLKDEDRIFTNLYGR           | 2348.6             | 2            | 3.9211 | 0.2992 |
| KTSLSFLNRPDLPNLAYKK            | 2206.6             | 3            | 4.9663 | 0.3536 |
| KTSNASRPNFLAPLPHEVTQLR         | 2477.8             | 3            | 4.0968 | 0.1949 |
| KTSQLETLNQLSTHVVVDITR          | 2636.0             | 3            | 6.4715 | 0.553  |
| KTSYLTELIDR                    | 1339.5             | 2            | 3.3411 | 0.3985 |
| KTTDEELEEMLESGNPAIFTSGIIDSQISK | 3284.6             | 3            | 6.3859 | 0.3896 |
| KTTDTASVQNEAK                  | 1393.5             | 2            | 4.9346 | 0.4213 |
| KTTDTASVQNEAKLDEILKEIK         | 2475.8             | 3            | 6.4218 | 0.4495 |
| KTTHFVEGGDAGNREDQINR           | 2245.4             | 2            | 4.2534 | 0.1663 |
| KTTPANPVGPSGGMSDDDKIR          | 2144.4             | 3            | 3.5909 | 0.2899 |
| KTTQSGQMSGEGK                  | 1339.5             | 2            | 4.0632 | 0.4098 |
| KTTTLSGTAPAAGVVPSR             | 1714.9             | 2            | 4.2663 | 0.4032 |
| KTTVLAMDQVPR                   | 1359.6             | 2            | 3.6375 | 0.4046 |
| KTVAYHEAGHAVAGWYLEHADPLLK      | 2778.1             | 3            | 4.7669 | 0.4351 |
| KTVGVPEPAADGK                  | 1172.3             | 2            | 3.7973 | 0.316  |
| KTVGVPEPAADGKGVVVVIK           | 1867.2             | 2            | 5.2163 | 0.4226 |
| KTVLGTPEVLLGALPGAGGTQR         | 2136.5             | 2            | 3.7322 | 0.3841 |
| KTVQGPPTSDDIFER                | 1690.8             | 2            | 2.8256 | 0.3325 |
| KTVTAMDVVYALK                  | 1439.7             | 2            | 4.6434 | 0.424  |
| KTVTAMDVVYALKR                 | 1595.9             | 2            | 5.6604 | 0.4639 |
| KTYRPELIKDGK                   | 1448.7             | 2            | 2.628  | 0.1278 |
| KVACIGAWHPAR                   | 1309.6             | 2            | 3.0982 | 0.1988 |

| Peptide Sequence                | Peptide mass (m/z) | Charge State | Xcorr  | DelCn2 |
|---------------------------------|--------------------|--------------|--------|--------|
| KVADALTNVAHVDDMPNALSALSDLHAHK   | 3126.5             | 3            | 6.0072 | 0.4031 |
| KVADGLVK                        | 830.0              | 1            | 2.0629 | 0.1725 |
| KVAGMDVELTVEER                  | 1576.8             | 2            | 3.5532 | 0.2105 |
| KVAHSDKPGSTSTASFR               | 1776.9             | 2            | 4.0908 | 0.3407 |
| KVAKVEPAVSSVNSIQVLTSK           | 2284.7             | 3            | 5.1733 | 0.4289 |
| KVALEMLFTGEPISAQEALLHGLLSK      | 2797.3             | 3            | 5.9348 | 0.5023 |
| KVAPAPAVVKK                     | 1108.4             | 2            | 2.69   | 0.1658 |
| KVAPQNDSFGTQLPPMHQQQR           | 2408.7             | 3            | 3.3335 | 0.2569 |
| KVASGVLSPPPAAPPSSSSVPEAGGPPIKK  | 2908.3             | 3            | 5.5626 | 0.3962 |
| KVAVATPAKK                      | 1013.3             | 2            | 3.3199 | 0.26   |
| KVAVFFSNTPTR                    | 1367.6             | 2            | 3.3218 | 0.2726 |
| KVAVPYSPAAGVDFELESFSER          | 2399.6             | 3            | 5.1614 | 0.4835 |
| KVAVVDYVEPSPQGTR                | 1746.0             | 2            | 5.0917 | 0.364  |
| KVDAGGKVK                       | 902.1              | 2            | 2.4607 | 0.1346 |
| KVDEAIALFQK                     | 1262.5             | 2            | 4.3087 | 0.3126 |
| KVDEQNKDYK                      | 1267.4             | 2            | 2.7728 | 0.1213 |
| KVDGGGTSAAASKPK                 | 1303.4             | 2            | 3.8093 | 0.2893 |
| KVDIAGIYPPVTPFTATAEVDYGKLEENLHK | 3519.0             | 3            | 4.3853 | 0.4348 |
| KVDIIADAAYSIFQKPK               | 1908.2             | 2            | 6.3932 | 0.449  |
| KVDPVSSDKVDPVFPR                | 1786.0             | 3            | 3.6735 | 0.2726 |
| KVDQPPEAK                       | 1012.1             | 2            | 2.4824 | 0.1857 |
| KVDTPNQGK                       | 1088.2             | 2            | 2.6617 | 0.1665 |
| KVDTPNQGKK                      | 1216.4             | 2            | 3.4627 | 0.2508 |
| KVDWLTEK                        | 1019.2             | 2            | 2.6046 | 0.1851 |
| KVEAAHCAACDLFIPMQFGIIQK         | 2535.0             | 3            | 3.7566 | 0.1096 |
| KVEAPETNIDKTPK                  | 1570.8             | 2            | 3.9193 | 0.2778 |
| KVEAPPAK                        | 840.0              | 2            | 2.5387 | 0.1571 |
| KVEAQLQELQVK                    | 1413.6             | 2            | 4.9186 | 0.2093 |
| KVEAQLQELQVKFNEGER              | 2146.4             | 3            | 4.8817 | 0.4074 |
| KVEEAAKVTGK                     | 1160.3             | 2            | 3.5762 | 0.2569 |
| KVEEAEPEEFVVEK                  | 1662.8             | 2            | 3.8494 | 0.3236 |
| KVEEDEAGGR                      | 1090.1             | 2            | 3.2278 | 0.2883 |
| KVEEDEAGGRFVAFSGEGQSLR          | 2369.5             | 3            | 4.8876 | 0.4331 |
| KVEEEGSPGDPDHEASTQGR            | 2126.1             | 3            | 4.193  | 0.2732 |
| KVEEVVYDLSIR                    | 1450.7             | 2            | 3.0854 | 0.202  |
| KVEGAQNQGK                      | 1059.2             | 2            | 3.0599 | 0.1784 |

| Peptide Sequence                      | Peptide mass (m/z) | Charge State | Xcorr  | DelCn2 |
|---------------------------------------|--------------------|--------------|--------|--------|
| KVEGAQNQGKK                           | 1187.3             | 2            | 3.2127 | 0.2282 |
| KVEGDIWALQKDVEDFLSPLLGKTPVTQVNEVTGTLR | 4098.6             | 3            | 6.9625 | 0.4903 |
| KVEGFDLVQKPSYYVR                      | 1929.2             | 2            | 4.333  | 0.3675 |
| KVEKDTMSDQALEALSASLGTR                | 2351.6             | 2            | 5.8943 | 0.5197 |
| KVEKVVVSNR                            | 1158.4             | 2            | 2.786  | 0.1738 |
| KVELPVPTHR                            | 1176.4             | 2            | 2.907  | 0.2064 |
| KVENEDMNKQDILLEK                      | 1947.2             | 2            | 5.594  | 0.2791 |
| KVENEDMNKQDILLEKEAELR                 | 2545.9             | 3            | 5.9438 | 0.2609 |
| KVENEDMNKQDILLEKEAELRR                | 2702.0             | 3            | 4.975  | 0.3885 |
| KVEPPTPQEPGPAK                        | 1475.7             | 2            | 3.8194 | 0.2235 |
| KVEPVPVTKQTPPSEAAASK                  | 2162.5             | 3            | 4.8117 | 0.3468 |
| KVEQGPPGGIGTAAIRPK                    | 1777.1             | 3            | 3.7526 | 0.2682 |
| KVEQLQQEYTEMK                         | 1654.9             | 2            | 4.5233 | 0.3855 |
| KVESLLDELAFVR                         | 1519.8             | 2            | 4.433  | 0.4151 |
| KVESLQEEIAFLK                         | 1534.8             | 2            | 5.5201 | 0.3516 |
| KVESLQEEIAFLKK                        | 1663.0             | 3            | 5.6223 | 0.4027 |
| KVESTGAVPEFKEEK                       | 1678.9             | 2            | 5.4161 | 0.4164 |
| KVESTKTDSR                            | 1151.3             | 2            | 2.6756 | 0.1893 |
| KVETDHIVAAVGLEPNVELAK                 | 2233.6             | 2            | 6.4441 | 0.5093 |
| KVFDPVPVGVTK                          | 1286.5             | 2            | 3.1678 | 0.2618 |
| KVFIEDVSR                             | 1093.3             | 2            | 2.535  | 0.2618 |
| KVGAENVAIVEPSEK                       | 1598.8             | 2            | 5.064  | 0.4029 |
| KVGAENVAIVEPSEKHFYQPIWTLVGAGAK        | 3268.7             | 3            | 4.8368 | 0.3798 |
| KVGALESK                              | 832.0              | 2            | 2.7967 | 0.1609 |
| KVGARRKASGAPAGAR                      | 1553.8             | 2            | 2.5454 | 0.1223 |
| KVGDDIAK                              | 846.0              | 2            | 2.7898 | 0.1886 |
| KVGNPFELDTQQGPQVDKEQFER               | 2690.9             | 3            | 5.4594 | 0.436  |
| KVGTFFSEVKPAGPTVEQQGEMAR              | 2594.9             | 3            | 5.6353 | 0.3731 |
| KVGWIFTDLVSEDTR                       | 1767.0             | 2            | 2.9799 | 0.216  |
| KVGYTPDWIFLLR                         | 1608.9             | 2            | 4.1675 | 0.3714 |
| KVHSPQQVDFR                           | 1341.5             | 2            | 2.5075 | 0.1115 |
| KVHVIFNYK                             | 1148.4             | 2            | 2.5241 | 0.2851 |
| KVIDDTNITR                            | 1175.3             | 2            | 3.5605 | 0.3306 |
| KVIDDTNITRLQLETEIEALKEELLFMKK         | 3463.0             | 3            | 4.1465 | 0.2238 |
| KVIPHFTATADAFKDDR                     | 1933.2             | 3            | 4.0056 | 0.3834 |
| KVIQYLAHVASSHK                        | 1581.8             | 2            | 2.8074 | 0.2364 |

| Peptide Sequence                     | Peptide mass (m/z) | Charge State | Xcorr  | DelCn2 |
|--------------------------------------|--------------------|--------------|--------|--------|
| KVIQYLAHVASSPK                       | 1541.8             | 2            | 4.3411 | 0.4093 |
| KVIQYLAYVASSHK                       | 1607.9             | 2            | 5.2707 | 0.4691 |
| KVISSANR                             | 875.0              | 2            | 2.6776 | 0.1333 |
| KVITMFVQR                            | 1122.4             | 2            | 2.7239 | 0.1885 |
| KVIVDFSSPNIK                         | 1418.7             | 2            | 2.8495 | 0.1723 |
| KVKDAQQVEPEGQEKPSATVR                | 2422.7             | 3            | 4.7938 | 0.2405 |
| KVLHMDRNPYYGGESASITPLEDLYK           | 2998.4             | 3            | 3.759  | 0.2143 |
| KVLHMDRNPYYGGESASITPLEDLYKR          | 3154.5             | 3            | 6.3196 | 0.3107 |
| KVLHMDRNPYYGGESSITPLEELYK            | 3028.4             | 3            | 4.5858 | 0.3714 |
| KVLHMDRNPYYGGESSITPLEELYKR           | 3184.6             | 3            | 6.3642 | 0.4577 |
| KVLSPYDLTHK                          | 1301.5             | 2            | 2.5513 | 0.1596 |
| KVMLALPSVR                           | 1114.4             | 2            | 3.0941 | 0.1472 |
| KVMSQEIQEQLHK                        | 1598.8             | 2            | 3.0535 | 0.1885 |
| KVMVLDFVTPPLGTR                      | 1775.1             | 2            | 3.8579 | 0.2727 |
| KVNAEGSVDSVFSQVCTHLDALK              | 2448.7             | 3            | 4.9895 | 0.3875 |
| KVNDKNPHVALYALEVMESVVK               | 2484.9             | 3            | 3.5333 | 0.1971 |
| KVNLGVGAYR                           | 1077.3             | 2            | 2.8153 | 0.2725 |
| KVNQQPNTSDKK                         | 1387.5             | 2            | 2.9448 | 0.1509 |
| KVNTGFLMSSYK                         | 1375.6             | 2            | 2.6158 | 0.1038 |
| KVNVTVDYIRPASPATETVPAFSEK            | 2749.1             | 3            | 3.6211 | 0.2984 |
| KVPDKLLDSSTVTHLFK                    | 1929.2             | 2            | 4.7089 | 0.4447 |
| KVPDVLVPLPDLPLPAIQANYRPLPSLELISSFQPK | 3967.7             | 3            | 3.5954 | 0.1033 |
| KVPEFQFLIGDEAATHLK                   | 2044.3             | 3            | 4.2152 | 0.3146 |
| KVPGVTAIELDEDTGTFK                   | 1949.2             | 3            | 3.2751 | 0.2609 |
| KVPILVAQEGESSQQLNDSSVIISALK          | 2855.2             | 3            | 5.4889 | 0.4003 |
| KVPNQYTHLSGLLDIFK                    | 1974.3             | 2            | 3.6029 | 0.3544 |
| KVPQVSTPTLVEVSR                      | 1640.9             | 2            | 5.1603 | 0.4678 |
| KVPTVSRPYSFIEFDTFIQK                 | 2403.8             | 2            | 3.2066 | 0.3143 |
| KVPVPPPKK                            | 990.3              | 1            | 1.792  | 0.1078 |
| KVQAAQSEAK                           | 1060.2             | 2            | 2.9587 | 0.2179 |
| KVQDLEQLIESAR                        | 1529.7             | 2            | 4.0482 | 0.2591 |
| KVQEEFDIDMDAPETER                    | 2053.2             | 2            | 5.6684 | 0.4299 |
| KVQFDGTNSAFKELKFLTPVR                | 2426.8             | 2            | 2.74   | 0.2058 |
| KVQHQDALQISDVVMASLLR                 | 2252.6             | 3            | 3.9413 | 0.3249 |
| KVQQELSRPGMLEMLLPQPEAVAR             | 2779.3             | 3            | 5.4353 | 0.2642 |
| KVQSGNINAAK                          | 1130.3             | 2            | 3.6969 | 0.3375 |

| Peptide Sequence               | Peptide mass (m/z) | Charge State | Xcorr  | DelCn2 |
|--------------------------------|--------------------|--------------|--------|--------|
| KVSDKEKIDQLQEELLHTQLK          | 2523.9             | 3            | 6.8153 | 0.32   |
| KVSEHSGGR                      | 957.0              | 2            | 2.5235 | 0.1766 |
| KVSEIKDILAQSPAAEPLKNIGNLFEEAEK | 3283.7             | 3            | 4.2365 | 0.2218 |
| KVSKQEEASGGPTAPK               | 1614.8             | 2            | 4.6328 | 0.3527 |
| KVSLAPQANLTELDIYSR             | 2019.3             | 3            | 4.4542 | 0.4547 |
| KVSNDAKR                       | 918.0              | 2            | 2.6651 | 0.1883 |
| KVSPESNEDISTTVVYR              | 1925.1             | 2            | 5.3065 | 0.4725 |
| KVSQEILELLNNTTAK               | 1789.1             | 2            | 4.6093 | 0.4095 |
| KVSQPIEGHAASFAQFK              | 1846.1             | 2            | 4.8703 | 0.4694 |
| KVSVSATPGHTK                   | 1212.4             | 2            | 3.2432 | 0.323  |
| KVSYSHIQSK                     | 1177.3             | 2            | 3.1261 | 0.3222 |
| KVTAEADSSSPTGILATSESK          | 2080.2             | 3            | 4.5419 | 0.4171 |
| KVTEENKELANELR                 | 1673.8             | 2            | 4.174  | 0.3264 |
| KVTGEVTDPSGK                   | 1218.3             | 2            | 2.4257 | 0.2616 |
| KVTHAVVTVPAYFNDAQR             | 2017.3             | 2            | 5.4745 | 0.4844 |
| KVTLSTDKNK                     | 1134.3             | 2            | 2.9581 | 0.1985 |
| KVTQLDLDGPK                    | 1214.4             | 2            | 2.9217 | 0.1803 |
| KVTSVVFHPSQDLVFSASPDATIR       | 2602.9             | 3            | 5.9957 | 0.5334 |
| KVTTTVHNIIVGK                  | 1410.7             | 2            | 3.4168 | 0.2968 |
| KVVATTQMQAADAR                 | 1490.7             | 2            | 2.8358 | 0.148  |
| KVVDDLLDQITGGDHSR              | 1869.0             | 2            | 2.46   | 0.1183 |
| KVVDNTTAK                      | 976.1              | 2            | 2.9936 | 0.3074 |
| KVVDNTTAKEFADSLGIPFLETSK       | 2683.0             | 2            | 5.5893 | 0.5291 |
| KVVDYSQFQESDDADEDYGR           | 2367.4             | 3            | 5.2226 | 0.2258 |
| KVVDYTTAK                      | 1025.2             | 1            | 2.7774 | 0.4123 |
| KVVDYTTAKEFADSLGIPFLETSK       | 2732.1             | 3            | 5.9423 | 0.5002 |
| KVVEDIEYLK                     | 1236.4             | 2            | 2.8588 | 0.2166 |
| KVVEINHEDLGHVSHLDILAVQEGK      | 3033.3             | 3            | 6.1206 | 0.4713 |
| KVVENEIYSESHR                  | 1590.7             | 2            | 3.9557 | 0.3548 |
| KVVETEDAYK                     | 1182.3             | 2            | 3.236  | 0.2019 |
| KVVGDVAYDEAK                   | 1294.4             | 2            | 3.9134 | 0.4146 |
| KVVGDVAYDEAKER                 | 1579.7             | 2            | 4.4259 | 0.5066 |
| KVVLEAPDETTLKELAETLQK          | 2484.8             | 3            | 6.1518 | 0.5415 |
| KVVVCDNGTGFVK                  | 1366.6             | 2            | 3.4434 | 0.3402 |
| KVVVSPTKK                      | 986.2              | 2            | 2.8298 | 0.2716 |
| KVVVVVPNEEDWKK                 | 1669.9             | 3            | 3.8322 | 0.2049 |



| Peptide Sequence            | Peptide mass (m/z) | Charge State | Xcorr  | DelCn2 |
|-----------------------------|--------------------|--------------|--------|--------|
| KVVYENAYGQFIGPHR            | 1879.1             | 2            | 4.8243 | 0.5276 |
| KVWLDPNETNEIANANSR          | 2072.2             | 2            | 5.6311 | 0.4587 |
| KWEAAHVAEQQR                | 1453.6             | 2            | 3.7003 | 0.3826 |
| KWENPGLGAESHTDSLRL          | 1898.0             | 3            | 4.915  | 0.2834 |
| KWGTDEVK                    | 963.1              | 2            | 2.5156 | 0.1025 |
| KWLPELVEHAK                 | 1350.6             | 2            | 2.7016 | 0.2258 |
| KWQDEDGKK                   | 1134.2             | 2            | 2.7769 | 0.2252 |
| KYAAELHLVHWNTK              | 1711.0             | 3            | 3.9505 | 0.3369 |
| KYAALYQPLFDK                | 1457.7             | 2            | 4.0789 | 0.3974 |
| KYAALYQPLFDKR               | 1613.9             | 3            | 4.1739 | 0.3486 |
| KYADALQEIIQER               | 1577.8             | 2            | 3.8522 | 0.3097 |
| KYAEAVTR                    | 938.1              | 1            | 2.7078 | 0.2465 |
| KYAELLEHR                   | 1288.4             | 2            | 2.8665 | 0.1282 |
| KYAPTEAQLNAVDALIDSMFLAK     | 2450.8             | 2            | 5.9792 | 0.549  |
| KYAPTEAQLNAVDALIDSMFLAKKDEK | 2951.3             | 3            | 4.1132 | 0.2443 |
| KYAVLYQPLFDKR               | 1641.9             | 2            | 5.261  | 0.4062 |
| KYDADSSGFISAAELR            | 1730.9             | 2            | 4.8403 | 0.4952 |
| KYDAFLASESLIK               | 1485.7             | 3            | 4.5368 | 0.3652 |
| KYDAFLASESLIKQIPR           | 1980.3             | 2            | 5.428  | 0.4205 |
| KYDASLKELAQQLKEQGLLNR       | 2318.7             | 2            | 5.9208 | 0.4252 |
| KYDEELEER                   | 1211.3             | 2            | 2.7765 | 0.2558 |
| KYDEVLHMVR                  | 1290.5             | 2            | 3.2984 | 0.2658 |
| KYDVDTLDMVFLDHWK            | 2026.3             | 3            | 5.4362 | 0.4169 |
| KYDVDTLDMVFLDHWKDR          | 2297.6             | 3            | 4.0848 | 0.2992 |
| KYEAAYGK                    | 930.0              | 1            | 2.9791 | 0.1349 |
| KYEDICPSTHNMDVPNIK          | 2105.4             | 3            | 4.5169 | 0.4363 |
| KYEDICPSTHNMDVPNIKR         | 2261.6             | 3            | 5.2244 | 0.4181 |
| KYEEIDNAPEER                | 1493.6             | 2            | 4.4133 | 0.3467 |
| KYEGGRELSDFISYLQR           | 2062.3             | 3            | 4.722  | 0.4244 |
| KYEHLLQLLDLAQEK             | 1842.1             | 2            | 5.2632 | 0.4054 |
| KYEHLLQLLDLAQEKVDVANRLEK    | 2867.3             | 3            | 5.0094 | 0.3172 |
| KYELGRPAANTK                | 1348.5             | 2            | 3.8979 | 0.2961 |
| KYEMFAQTLQQSR               | 1630.9             | 2            | 5.0866 | 0.4499 |
| KYEPPVPTR                   | 1087.3             | 2            | 2.6008 | 0.1987 |
| KYEQQEQKQEDLKIIEEK          | 2365.6             | 3            | 3.4771 | 0.114  |
| KYEQQFITDPVVLSPK            | 1822.1             | 2            | 4.8496 | 0.4492 |

| Peptide Sequence                   | Peptide mass (m/z) | Charge State | Xcorr  | DelCn2 |
|------------------------------------|--------------------|--------------|--------|--------|
| KYEQGFITDPVVLSPKDR                 | 2093.4             | 3            | 4.8791 | 0.3734 |
| KYFHAQLQLEQLQEENFR                 | 2322.6             | 3            | 4.55   | 0.2441 |
| KYFSLKPEEKDEK                      | 1641.8             | 2            | 4.3605 | 0.2446 |
| KYGGPPPSVYSGQQPSVGTEIFVGK          | 2696.0             | 3            | 4.4165 | 0.3507 |
| KYGGPPPSVYSGQQPSVGTEIFVGKIPR       | 3062.4             | 3            | 5.7975 | 0.3523 |
| KYGGPPPSVYSGVQPGIGTEVFGK           | 2636.9             | 3            | 3.7659 | 0.224  |
| KYGGPPPSVYSGVQPGIGTEVFGKIPR        | 3003.4             | 3            | 6.3766 | 0.4301 |
| KYGTDLR                            | 940.0              | 1            | 1.9197 | 0.1004 |
| KYGYILPDITKDELK                    | 1944.3             | 3            | 4.3863 | 0.3387 |
| KYHIDLDPHFNDILGQHSR                | 2306.5             | 2            | 3.5457 | 0.2947 |
| KYIIHKYPSLELER                     | 1790.1             | 3            | 4.1179 | 0.3521 |
| KYILGNPLTPGVTQGPQIDKEQYDK          | 2804.1             | 3            | 6.4942 | 0.4478 |
| KYILGNPLTPGVTQGPQIDKEQYDKILDIESGK  | 3773.3             | 3            | 5.1379 | 0.3904 |
| KYILGNPLTPGVTQGPQIDKEQYDKILDIESGKK | 3901.5             | 3            | 5.7882 | 0.4789 |
| KYKEALLGR                          | 1078.3             | 2            | 2.849  | 0.1354 |
| KYLGQLHYLQSR                       | 1506.7             | 2            | 4.0709 | 0.4122 |
| KYLKPSGNMFPTIGDVHLAPFTDEQLYMEQFTK  | 3848.4             | 3            | 3.7518 | 0.2232 |
| KYLYEIAR                           | 1056.2             | 2            | 2.8419 | 0.1058 |
| KYMEENDQLK                         | 1298.4             | 2            | 2.7255 | 0.2122 |
| KYMEENDQLKK                        | 1426.6             | 2            | 4.1305 | 0.2964 |
| KYNWSAK                            | 897.0              | 2            | 2.6308 | 0.2868 |
| KYPVAHFIDQTLK                      | 1560.8             | 2            | 3.2832 | 0.2844 |
| KYPYWPHQPIENL                      | 1685.9             | 2            | 3.4974 | 0.2781 |
| KYQILNNEVFAILNK                    | 1808.1             | 2            | 2.5375 | 0.1566 |
| KYRGFTIPEAFR                       | 1485.7             | 2            | 2.4536 | 0.1954 |
| KYRIPADVPLTITSSLSGVLTVNGPR         | 3073.4             | 3            | 4.8179 | 0.3255 |
| KYRPLFDYFLK                        | 1490.8             | 2            | 2.9042 | 0.2225 |
| KYSIFTEKDEILSDVASR                 | 2102.3             | 2            | 3.5994 | 0.2819 |
| KYSQFINFPIYVWSSK                   | 2008.3             | 2            | 5.5658 | 0.4106 |
| KYTEQITNEK                         | 1254.4             | 2            | 3.6439 | 0.2706 |
| KYTLPPGVDPTQVSSLSPEGLTVEAPMPK      | 3228.7             | 3            | 6.9182 | 0.5033 |
| KYTMGDAPDYDR                       | 1432.5             | 2            | 3.693  | 0.445  |
| KYTPEQVAMATVTALHR                  | 1917.2             | 3            | 5.1465 | 0.5005 |
| KYVATLGVEVHPLVFHTNR                | 2181.5             | 2            | 5.6751 | 0.4594 |
| KYVLENHPGTNSNYQMHLK                | 2387.7             | 2            | 5.1351 | 0.3401 |
| KYVSQYYPK                          | 1176.3             | 2            | 2.8928 | 0.3406 |

| Peptide Sequence                    | Peptide mass (m/z) | Charge State | Xcorr  | DelCn2 |
|-------------------------------------|--------------------|--------------|--------|--------|
| KYVVQNPEQEPLSQFLR                   | 2076.3             | 3            | 4.0194 | 0.168  |
| KYWDVPPPGFEHITPMQYK                 | 2334.7             | 3            | 3.597  | 0.288  |
| KYYFNNPEDGFFK                       | 1669.8             | 2            | 2.6614 | 0.2043 |
| KYYFNNPEDGFFK                       | 1798.0             | 2            | 4.0915 | 0.3609 |
| KYYGTKDPVPGYSVPAAEHSTITAWGK         | 2925.2             | 3            | 4.4186 | 0.3284 |
| KYYKVEPLDFGGTQK                     | 1774.0             | 2            | 5.1732 | 0.4436 |
| KYYLDLKENQR                         | 1470.7             | 2            | 3.108  | 0.3132 |
| LAAAEETAVSPR                        | 1215.3             | 2            | 4.0945 | 0.2635 |
| LAAAFVSR                            | 906.1              | 2            | 3.4091 | 0.3642 |
| LAAAFVSRLEQDEYALR                   | 2024.3             | 3            | 5.7264 | 0.4346 |
| LAAAILGGVDQIHKPGAK                  | 1873.2             | 2            | 4.7717 | 0.4641 |
| LAACGPPPVAPPAVAVAAGGAR              | 1985.3             | 2            | 2.5674 | 0.2729 |
| LAADAGTFLSR                         | 1122.3             | 2            | 3.2983 | 0.416  |
| LAADDFR                             | 807.9              | 2            | 2.526  | 0.2231 |
| LAADDFRTKFETEALR                    | 2012.2             | 2            | 3.507  | 0.2423 |
| LAADEDDEDDDEEDDEDDDDDFDDEEAEEKAPVK  | 4120.8             | 3            | 6.8498 | 0.4969 |
| LAADEDDEDDDEEDDEDDDDDFDDEEAEEKAPVKK | 4248.9             | 3            | 6.6304 | 0.4292 |
| LAADPSVVNLGQGFPDISPPTYVKEELSK       | 3073.4             | 3            | 4.9099 | 0.4548 |
| LAADVGK                             | 673.8              | 1            | 2.0707 | 0.1332 |
| LAADVGKAGAEREFR                     | 1590.8             | 2            | 2.856  | 0.252  |
| LAADVGKSGTER                        | 1204.3             | 2            | 2.7477 | 0.2495 |
| LAADVGKSGTEREFR                     | 1636.8             | 2            | 2.8618 | 0.1597 |
| LAAEQELIR                           | 1043.2             | 2            | 2.7762 | 0.1643 |
| LAAESSSSQPPQQR                      | 1486.6             | 2            | 2.6936 | 0.2382 |
| LAAFGQLHK                           | 985.2              | 2            | 2.6517 | 0.1404 |
| LAAIAESGVER                         | 1116.3             | 2            | 3.3356 | 0.3172 |
| LAAIAESGVERQVLLGDQIPK               | 2208.5             | 3            | 4.6094 | 0.2251 |
| LAAIGEATR                           | 902.0              | 2            | 3.0439 | 0.183  |
| LAALADQWQFLVQK                      | 1631.9             | 2            | 2.6963 | 0.2407 |
| LAALNPESNTAGLDIFAK                  | 1846.1             | 2            | 5.403  | 0.4264 |
| LAALPENPPAIDWAYYK                   | 1933.2             | 2            | 4.4273 | 0.3787 |
| LAALQGRLEGLGSSEADQDGLASTVR          | 2615.8             | 3            | 6.0147 | 0.5814 |
| LAANAFLAQR                          | 1075.2             | 2            | 3.5105 | 0.2739 |
| LAANDFFR                            | 954.1              | 2            | 2.6859 | 0.2439 |
| LAAQFIPK                            | 888.1              | 2            | 2.4034 | 0.1408 |
| LAAQSQHVGAFAR                       | 1285.4             | 2            | 2.9823 | 0.1418 |

| Peptide Sequence                        | Peptide mass (m/z) | Charge State | Xcorr  | DelCn2 |
|-----------------------------------------|--------------------|--------------|--------|--------|
| LAASEAATAISHQAIQILGGMGYVTEMPAER         | 3188.6             | 3            | 3.7919 | 0.2232 |
| LAASVLDALDPPGPTLDPLDLLPYSETRLDALDSFGSTR | 4114.6             | 3            | 3.8847 | 0.3028 |
| LAATNALLNSLEFTK                         | 1606.8             | 2            | 5.2985 | 0.4558 |
| LAATTFISQGIPVYLFSDITPTFPVPFTVSHLK       | 3610.2             | 3            | 4.888  | 0.3761 |
| LAAVALINAAIQK                           | 1296.6             | 2            | 3.6388 | 0.2645 |
| LAAVDATVNQVLASR                         | 1528.7             | 2            | 5.4762 | 0.5305 |
| LAAVEALNDGELQKAIDLFTDAIK                | 2559.9             | 2            | 3.3032 | 0.4029 |
| LADAAENFQK                              | 1107.2             | 2            | 3.0986 | 0.3372 |
| LADALQELR                               | 1029.2             | 2            | 3.9558 | 0.291  |
| LADALQELRAQHEDQVEQYKK                   | 2513.7             | 3            | 5.6936 | 0.4099 |
| LADALQELRAQHEDQVEQYKKELEK               | 3013.3             | 3            | 6.6337 | 0.3573 |
| LADALQELRAQHEDQVEQYKKELEKTYSAK          | 3563.9             | 3            | 3.883  | 0.2302 |
| LADDLGFEEFEASAK                         | 1660.8             | 2            | 5.1601 | 0.4666 |
| LADDLSTLQEK                             | 1233.4             | 2            | 3.9398 | 0.294  |
| LADDVDLEQVANETHGHVGDLAALCSEAALQAIR      | 3617.9             | 3            | 7.3536 | 0.4799 |
| LADFGLAR                                | 863.0              | 2            | 2.7258 | 0.2221 |
| LADFGVAGQLTDTQIKR                       | 1834.1             | 2            | 4.6988 | 0.3645 |
| LADFGVLHR                               | 1028.2             | 2            | 2.8845 | 0.2492 |
| LADFGVLHRNELSGALTGLTR                   | 2241.5             | 3            | 5.3112 | 0.4244 |
| LADGGATNQGR                             | 1060.1             | 2            | 3.865  | 0.3494 |
| LADHFGGK                                | 844.9              | 1            | 2.1945 | 0.1821 |
| LADIEQSTGIR                             | 1203.3             | 2            | 3.4442 | 0.2676 |
| LADIQIEQLNR                             | 1313.5             | 2            | 2.7634 | 0.1292 |
| LADKLYNLR                               | 1106.3             | 2            | 2.9779 | 0.1962 |
| LADKVNSSWQR                             | 1304.4             | 2            | 3.1381 | 0.2932 |
| LADKYPVVHIGKR                           | 1496.8             | 3            | 5.1142 | 0.404  |
| LADLASDLLLQYLLQGGR                      | 2031.3             | 3            | 6.1435 | 0.4697 |
| LADLASDLLLQYLLQGGRQ                     | 2159.5             | 2            | 5.4149 | 0.419  |
| LADLEQEQSSKR                            | 1404.5             | 2            | 3.0306 | 0.2125 |
| LADLIERDRLLLATMESMNGGK                  | 2447.9             | 3            | 3.4887 | 0.1667 |
| LADLTGPIPK                              | 1138.4             | 2            | 3.1505 | 0.1991 |
| LADMALALESAR                            | 1261.5             | 2            | 2.8318 | 0.1863 |
| LADMYGGGEDD                             | 1143.2             | 1            | 2.2291 | 0.1769 |
| LADPVFIGFCVLQGADCGAK                    | 2025.4             | 2            | 3.1094 | 0.1559 |
| LADQSGLDVIR                             | 1187.3             | 2            | 3.2509 | 0.3429 |
| LADSDQASKVQQQK                          | 1546.7             | 2            | 3.5932 | 0.1442 |

| Peptide Sequence                         | Peptide mass (m/z) | Charge State | Xcorr  | DelCn2 |
|------------------------------------------|--------------------|--------------|--------|--------|
| LAEEAAVAEKR                              | 1058.2             | 2            | 2.8382 | 0.1244 |
| LAEEAETAR                                | 990.0              | 2            | 3.0168 | 0.2639 |
| LAEEAFKYFVQGMGYMPSASMTR                  | 2486.9             | 3            | 4.8701 | 0.511  |
| LAEEALYIADRK                             | 1263.5             | 2            | 3.1416 | 0.261  |
| LAEEAQIEELR                              | 1172.3             | 2            | 3.3224 | 0.2253 |
| LAEDAPNFDGPAAEGQPGQK                     | 2013.1             | 2            | 4.4582 | 0.3935 |
| LAEDILNTMFDTSYSK                         | 1849.1             | 2            | 3.2067 | 0.242  |
| LAEEEDLFDSAHP EEGDL DLASESTAH AQSSK      | 3430.5             | 3            | 6.4452 | 0.4695 |
| LAEEENKAK                                | 1032.1             | 2            | 3.1937 | 0.1263 |
| LAEEENKAKAEASSGDHPTDTEMKEEQK             | 3104.3             | 3            | 4.8596 | 0.2953 |
| LAEEKAQASSIPVGSR                         | 1643.8             | 2            | 4.7576 | 0.4264 |
| LAEENPDLQEAYIAK                          | 1704.9             | 2            | 5.1026 | 0.4422 |
| LAEFQTDSQ GK                             | 1224.3             | 2            | 3.1971 | 0.158  |
| LAEIQELHQSVR                             | 1423.6             | 2            | 3.1639 | 0.2836 |
| LAEISDVWEEMK                             | 1450.6             | 2            | 2.8009 | 0.2457 |
| LAEISDVWEEMKTTLK                         | 1894.2             | 2            | 2.6351 | 0.262  |
| LAEKEETGMAMR                             | 1366.6             | 3            | 3.7755 | 0.3439 |
| LAEKEKVDLVLLGK                           | 1555.9             | 2            | 4.3901 | 0.4021 |
| LAEKENAR                                 | 931.0              | 2            | 2.5247 | 0.1835 |
| LAEKTETVDRLER                            | 1560.7             | 2            | 3.1056 | 0.1495 |
| LAEELEEFINGPNNAHIQQVGDR                  | 2465.7             | 2            | 5.7559 | 0.3974 |
| LAELHADLK                                | 1010.2             | 2            | 3.0741 | 0.2526 |
| LAELNSYVPVTAYTGPLVEDFLSGFQVVVLTNTPLEDQLR | 4411.0             | 3            | 4.1628 | 0.4132 |
| LAELQEQLKAVHEQLAALSQAPV NKPK             | 2955.4             | 3            | 4.0208 | 0.2753 |
| LAELSDYRR                                | 1123.2             | 2            | 2.5797 | 0.1099 |
| LAEMPADSGYPAYLGAR                        | 1783.0             | 2            | 5.1465 | 0.5249 |
| LAENFCVCHLATGDMLR                        | 1894.2             | 2            | 3.1171 | 0.2348 |
| LAENIDAQLKR                              | 1271.4             | 2            | 3.1052 | 0.3115 |
| LAENSASSDLLVAE VGISDYGDK LNMELSEK        | 3414.7             | 3            | 4.3222 | 0.2861 |
| LAEPQSQGNSQVLLDAPIQLSK                   | 2337.6             | 2            | 5.0727 | 0.4019 |
| LAEPSQMLK                                | 1017.2             | 2            | 2.7251 | 0.1169 |
| LAEQAERYDDMAAAMK                         | 1814.0             | 2            | 4.3587 | 0.3699 |
| LAEQAERYDDMAACMK                         | 1846.1             | 3            | 4.1698 | 0.2427 |
| LAEQAERYDDMASAMK                         | 1830.0             | 2            | 4.2717 | 0.3729 |
| LAEQAERYDEM VESMK                        | 1930.2             | 3            | 3.9574 | 0.2448 |
| LAEQAERYDEM VESMKK                       | 2058.3             | 3            | 5.8813 | 0.3932 |

| Peptide Sequence                         | Peptide mass (m/z) | Charge State | Xcorr  | DelCn2 |
|------------------------------------------|--------------------|--------------|--------|--------|
| LAEQFVLLNLVYETTDKHLSPDGQYVPR             | 3247.6             | 3            | 4.8909 | 0.3862 |
| LAERESQEQGLR                             | 1416.5             | 2            | 3.4969 | 0.2152 |
| LAETQEEISAEVAAK                          | 1589.7             | 2            | 3.782  | 0.3598 |
| LAETTDKVK                                | 1005.1             | 2            | 2.5857 | 0.1186 |
| LAETYLHR                                 | 1003.1             | 2            | 2.583  | 0.1526 |
| LAEVALAYAK                               | 1049.2             | 2            | 3.0925 | 0.3223 |
| LAEVLEAVMPHLDQTPNPLVSSVFHR               | 2901.3             | 3            | 3.9873 | 0.2072 |
| LAFHGILLHGLEDR                           | 1591.8             | 2            | 3.6538 | 0.4008 |
| LAFLNVQAAEEALPR                          | 1642.9             | 2            | 3.9029 | 0.382  |
| LAFPSPFGLHSEGFSHSR                       | 1974.2             | 2            | 4.6272 | 0.2274 |
| LAGAPSEDPQFPK                            | 1357.5             | 2            | 3.2811 | 0.1968 |
| LAGAWASEAYSPQGLKPVVSTEAPPIIFATPTK        | 3399.9             | 3            | 5.3838 | 0.4677 |
| LAGDHIEYYK                               | 1209.3             | 2            | 2.8037 | 0.1917 |
| LAGDPSAGDGAAPR                           | 1255.3             | 2            | 3.9914 | 0.3635 |
| LAGESESNLR                               | 1076.1             | 2            | 3.6408 | 0.2585 |
| LAGESESNLRK                              | 1204.3             | 2            | 3.2984 | 0.2344 |
| LAGGDWFTSR                               | 1110.2             | 2            | 3.3058 | 0.3287 |
| LAGGHGVSASR                              | 1012.1             | 2            | 2.6686 | 0.2504 |
| LAGGNDVGIFVAGIQEGTSAEQEGLQEGDQILK        | 3345.6             | 3            | 4.151  | 0.325  |
| LAGGNDVGIFVAGIQEGTSAEQEGLQEGDQILKVNTQDFR | 4206.5             | 3            | 5.3237 | 0.442  |
| LAGGNDVGIFVAGVLEDSPAAKEGLEEGDQILR        | 3341.7             | 3            | 6.0831 | 0.4572 |
| LAGGYENVPTVDIHMK                         | 1745.0             | 2            | 4.6548 | 0.4489 |
| LAGHLSIEDPRFPK                           | 1467.7             | 2            | 3.3172 | 0.2059 |
| LAGLFNEQR                                | 1048.2             | 1            | 3.4911 | 0.2898 |
| LAGLGLQQLDEGLFSR                         | 1717.9             | 2            | 3.0365 | 0.1373 |
| LAGLHDAILR                               | 1079.3             | 2            | 2.6869 | 0.2358 |
| LAGLSAALLR                               | 985.2              | 2            | 3.4946 | 0.3094 |
| LAGNEQVTR                                | 988.1              | 2            | 2.4542 | 0.1706 |
| LAGPQLVQMFIGDGAK                         | 1645.9             | 2            | 4.9366 | 0.3963 |
| LAGSALTDKHSDKS                           | 1430.5             | 2            | 3.7378 | 0.3031 |
| LAGSLLTQALESHAEGFR                       | 1901.1             | 3            | 3.9619 | 0.4671 |
| LAGTQPLEVLEAVQR                          | 1624.9             | 2            | 5.5697 | 0.4359 |
| LAGTSGSDKGLSGK                           | 1278.4             | 2            | 2.8087 | 0.2355 |
| LAHALLHTQTK                              | 1233.4             | 2            | 3.0749 | 0.2832 |
| LAHEVGWK                                 | 940.1              | 2            | 2.7686 | 0.2008 |
| LAHGGQVNLDMEDHRDEDFVKPK                  | 2651.9             | 3            | 3.757  | 0.3801 |

| Peptide Sequence                        | Peptide mass (m/z) | Charge State | Xcorr  | DelCn2 |
|-----------------------------------------|--------------------|--------------|--------|--------|
| LAHLGVQVK                               | 965.2              | 2            | 2.6009 | 0.251  |
| LAHLGVQVKGEDEEENNLEVR                   | 2379.6             | 3            | 4.3923 | 0.2482 |
| LAHQIQFTDKDKDNVAPR                      | 2260.5             | 3            | 3.3165 | 0.229  |
| LAHQSWALLHEESPLNNFLLSHGPGIR             | 3038.4             | 3            | 3.853  | 0.1628 |
| LAHVSEPSTCVYALTFETPLVCHPHALLVYPTLPEALQR | 4319.0             | 3            | 4.1338 | 0.3289 |
| LAHYNK                                  | 745.8              | 1            | 1.7636 | 0.1228 |
| LAHYNKR                                 | 902.0              | 2            | 2.4319 | 0.1906 |
| LAIEAGFHHIDSAHVYNNNEEQVGLAIR            | 3005.3             | 3            | 3.9879 | 0.3066 |
| LAIEAGFR                                | 877.0              | 2            | 2.5165 | 0.122  |
| LAIKLPDDQIPK                            | 1351.6             | 2            | 2.8428 | 0.2004 |
| LAILGIHNEVSK                            | 1294.5             | 2            | 3.5192 | 0.2705 |
| LAISEDHVASVK                            | 1269.4             | 2            | 2.7073 | 0.2607 |
| LAKADGIVSK                              | 1002.2             | 2            | 2.7291 | 0.186  |
| LAKDREAAEGLGSHER                        | 1739.9             | 3            | 4.7297 | 0.3448 |
| LAKDSNTILLPSNPGDVTSMVAQAMGVYGALTK       | 3364.9             | 3            | 6.1226 | 0.4976 |
| LAKELGLETYKVNEVER                       | 1992.3             | 2            | 5.2329 | 0.4532 |
| LAKENAPAIIFIDEIDAIATK                   | 2257.6             | 2            | 5.7352 | 0.5294 |
| LAKENAPAIIFIDEIDAIATKR                  | 2413.8             | 3            | 5.3473 | 0.4978 |
| LAKEQEQAQK                              | 1173.3             | 2            | 2.8669 | 0.1163 |
| LAKHESQQDYSK                            | 1434.5             | 2            | 3.2275 | 0.2443 |
| LAKLSDGVAVLK                            | 1214.5             | 2            | 2.9314 | 0.2671 |
| LAKVDATEESDLAQQYGVR                     | 2094.3             | 2            | 6.8147 | 0.5385 |
| LAKYNQLLR                               | 1119.3             | 2            | 3.0774 | 0.1762 |
| LAKYNQLLRIEEEELGSK                      | 2005.3             | 3            | 4.0096 | 0.3265 |
| LALADAGDVEDANFVEAMADAGILR               | 2649.9             | 2            | 3.668  | 0.4165 |
| LALDIEIATYR                             | 1278.5             | 2            | 3.809  | 0.3641 |
| LALDIEIATYRK                            | 1406.7             | 2            | 2.9852 | 0.2129 |
| LALDLEIATYR                             | 1278.5             | 2            | 3.967  | 0.3607 |
| LALDMEIHAYR                             | 1332.6             | 2            | 2.8744 | 0.3728 |
| LALDMEIHAYRK                            | 1460.7             | 2            | 3.1068 | 0.2112 |
| LALDMEINAYRK                            | 1437.7             | 2            | 3.1824 | 0.1719 |
| LALAEVSELRAELSSLQTAR                    | 2287.6             | 3            | 6.3911 | 0.4891 |
| LALAEVSELRAELSSLQTARQEGEQR              | 3015.3             | 3            | 3.9863 | 0.2292 |
| LALLEGVEKERDFYFGK                       | 1902.1             | 2            | 4.1249 | 0.476  |
| LALLELPDVTKEDLAIQKDLEELEVILRD           | 3222.7             | 3            | 4.0217 | 0.177  |
| LALGDDSPALK                             | 1100.2             | 2            | 2.443  | 0.2185 |

| Peptide Sequence                   | Peptide mass (m/z) | Charge State | Xcorr  | DelCn2 |
|------------------------------------|--------------------|--------------|--------|--------|
| LALGDDSPALKEK                      | 1357.5             | 2            | 3.1699 | 0.2873 |
| LALGDDSPALKEKR                     | 1513.7             | 2            | 3.6438 | 0.3268 |
| LALGIPLPELR                        | 1192.5             | 2            | 2.4369 | 0.2639 |
| LALHELKNLTQYSWLLDGFPR              | 2515.9             | 3            | 4.5124 | 0.4445 |
| LALIGQSLFGQEVYSHLRK                | 2160.5             | 2            | 3.0725 | 0.2925 |
| LALIQLQISSIK                       | 1327.6             | 2            | 3.0168 | 0.2761 |
| LALKEGHSVLESRLR                    | 1552.8             | 2            | 2.7474 | 0.1904 |
| LALLEEAR                           | 915.1              | 2            | 2.5512 | 0.1071 |
| LALLHEGTGPR                        | 1164.3             | 2            | 2.9603 | 0.3016 |
| LALLQEERDKLITEMDR                  | 2074.4             | 3            | 3.704  | 0.2927 |
| LALLVDTVGPR                        | 1154.4             | 2            | 4.1474 | 0.3218 |
| LALQALTEK                          | 987.2              | 2            | 2.4527 | 0.1408 |
| LALQLHPDRNPDDPQAQEK                | 2186.4             | 3            | 4.1985 | 0.334  |
| LALSQAHSVLVQAEAPR                  | 1691.9             | 2            | 3.8247 | 0.3069 |
| LALVTGGEIASTFDHPELVK               | 2098.4             | 2            | 5.3201 | 0.4908 |
| LAMLEEDLLALKSPSKENIASVLENYHTESK    | 3474.9             | 3            | 5.0514 | 0.3895 |
| LAMQEFMILPVGAANFR                  | 1909.3             | 2            | 5.7407 | 0.4917 |
| LAMQEFMILPVGAESFR                  | 1940.3             | 2            | 4.9244 | 0.424  |
| LAMSKKEELEEEELDEAVER               | 2249.5             | 3            | 3.9698 | 0.2132 |
| LANEERDAENPDEPKEGVNR               | 2283.4             | 3            | 3.8362 | 0.1442 |
| LANFGGLAVGLGFGALAEVAK              | 1976.3             | 2            | 2.4104 | 0.2454 |
| LANFLVHSSNMFMAILSSTNVGSNTY         | 2729.0             | 2            | 4.4936 | 0.356  |
| LANILFTQELAR                       | 1389.6             | 2            | 2.8531 | 0.2254 |
| LANQAADYFGDAFK                     | 1531.7             | 2            | 3.1263 | 0.2492 |
| LANQFAIYKPVTDFFLQLVDAGK            | 2600.0             | 3            | 5.484  | 0.4756 |
| LANQFAIYKPVTDFFLQLVDAGKVDDAR       | 3156.6             | 3            | 4.8105 | 0.447  |
| LANRAPEPTPQQVAQQQ                  | 1877.1             | 2            | 4.3625 | 0.3886 |
| LANRLYGEKTYNFLPEFLVSTQK            | 2733.1             | 3            | 5.6538 | 0.432  |
| LANSEPVGTQTAK                      | 1316.4             | 2            | 2.9051 | 0.2441 |
| LAPALATGNTVVMK                     | 1386.7             | 2            | 3.5667 | 0.3859 |
| LAPEYEEAATR                        | 1192.3             | 2            | 3.5974 | 0.3316 |
| LAPGTIVEVWK                        | 1213.5             | 2            | 2.5919 | 0.285  |
| LAPGTIVEVWKDSAYPEELSR              | 2361.6             | 2            | 3.5413 | 0.2352 |
| LAPITSDPTEATAVGAVEASFK             | 2176.4             | 2            | 6.1967 | 0.5822 |
| LAPITSDPTEATAVGAVEASFKCCSGAIIIVLTK | 3265.8             | 3            | 3.2154 | 0.1113 |
| LAPPLVTLLSGEPEVQYVALR              | 2266.7             | 3            | 4.7927 | 0.3491 |



| Peptide Sequence                  | Peptide mass (m/z) | Charge State | Xcorr  | DelCn2 |
|-----------------------------------|--------------------|--------------|--------|--------|
| LAPRERPPSGTLEKLVSEAKAQLR          | 2648.1             | 3            | 3.2529 | 0.1175 |
| LAPSRQDIFQEQLAAIPEFLNIGPLFK       | 3057.5             | 3            | 4.141  | 0.2913 |
| LAPVPPFFSLLQYE                    | 1524.8             | 2            | 2.6594 | 0.1121 |
| LAQAAQSSVATITR                    | 1417.6             | 2            | 4.6397 | 0.4969 |
| LAQAEEQLEQETR                     | 1545.6             | 2            | 3.2723 | 0.1303 |
| LAQAHPAGPPTLDPVNDLQLKDMSVVEGGLR   | 3240.7             | 3            | 6.1672 | 0.4749 |
| LAQALHEMR                         | 1069.3             | 2            | 3.0691 | 0.3132 |
| LAQALHEMREQHDAQVR                 | 2033.3             | 2            | 3.7086 | 0.3672 |
| LAQANGWGVMSHR                     | 1526.7             | 3            | 3.9145 | 0.3531 |
| LAQATQERTDLYAK                    | 1608.8             | 2            | 3.2843 | 0.3409 |
| LAQAWFNTHR                        | 1244.4             | 2            | 3.1735 | 0.2738 |
| LAQDDLHIMDSLELPTGDPQYLTELAHYRR    | 3512.9             | 3            | 3.4371 | 0.2532 |
| LAQDFLDSQNLSAYNTR                 | 1957.1             | 2            | 6.0152 | 0.5179 |
| LAQDGAHVVSRR                      | 1339.5             | 2            | 3.4303 | 0.2948 |
| LAQDPFPLYPGEVLEK                  | 1817.1             | 2            | 4.4261 | 0.3777 |
| LAQDPFPLYPGEVLEKDITPLQVVLPNTALHLK | 3671.3             | 3            | 4.9864 | 0.4152 |
| LAQEEAQHR                         | 1082.2             | 2            | 3.0235 | 0.1069 |
| LAQEEESEAKR                       | 1290.4             | 2            | 2.8855 | 0.1974 |
| LAQEGIYTLYPFINSR                  | 1886.1             | 2            | 3.2715 | 0.3195 |
| LAQENEVDFILLGGDLFHENKPSR          | 2743.0             | 3            | 3.4584 | 0.1855 |
| LAQENEVDFILLGGDLFHENKPSRK         | 2871.2             | 3            | 3.8654 | 0.2167 |
| LAQENGWGVMSHR                     | 1584.8             | 2            | 3.0662 | 0.161  |
| LAQEQQGGDNSLLVR                   | 1557.7             | 2            | 3.1253 | 0.1734 |
| LAQFEPSQR                         | 1076.2             | 2            | 3.0951 | 0.2627 |
| LAQGEYIAPEKIENIYMR                | 2139.5             | 3            | 3.501  | 0.1209 |
| LAQGHTTVDELAR                     | 1411.5             | 3            | 4.4852 | 0.4403 |
| LAQGISQLDRELHLQVVAR               | 2147.5             | 3            | 3.8254 | 0.3054 |
| LAQGLTHLGK                        | 1038.2             | 2            | 3.0681 | 0.2228 |
| LAQHALAGMQK                       | 1168.4             | 2            | 2.9506 | 0.298  |
| LAQHTLQALQSELSLRADNIKLFEK         | 2983.4             | 3            | 4.7414 | 0.3179 |
| LAQIREEK                          | 987.1              | 2            | 2.5568 | 0.1565 |
| LAQKAFEYGVK                       | 1254.5             | 2            | 3.0153 | 0.2696 |
| LAQKKPFTPVK                       | 1257.5             | 2            | 2.5692 | 0.2029 |
| LAQKNPMYQK                        | 1221.5             | 2            | 2.948  | 0.1642 |
| LAQKVPTADLEDVLPLAEDITNILSK        | 2808.2             | 3            | 5.4943 | 0.4563 |
| LAQLEEAKQASIQHIQNAIDTEK           | 2579.8             | 3            | 4.8527 | 0.4823 |

| Peptide Sequence                 | Peptide mass (m/z) | Charge State | Xcorr  | DelCn2 |
|----------------------------------|--------------------|--------------|--------|--------|
| LAQLEEAKQASIQHIQNAIDTEKSQQALVQKR | 3619.0             | 3            | 8.8257 | 0.5715 |
| LAQLQVAYHQLFQEYDNHIK             | 2459.7             | 3            | 4.0666 | 0.2391 |
| LAQLTLEQILEHLDNLR                | 2020.3             | 2            | 5.054  | 0.2985 |
| LAQMAILLAEVDKVAR                 | 1742.1             | 2            | 2.639  | 0.187  |
| LAQNILSYLDLK                     | 1391.6             | 2            | 3.4074 | 0.2215 |
| LAQPYVGVFLK                      | 1235.5             | 2            | 3.0997 | 0.2071 |
| LAQQEKQEQVK                      | 1329.5             | 2            | 3.4118 | 0.1586 |
| LAQQEKQEQVKIESLAK                | 1971.2             | 2            | 5.5408 | 0.3993 |
| LAQQGSDLIVPAGGQR                 | 1610.8             | 2            | 3.9361 | 0.3893 |
| LAQQISDEASR                      | 1218.3             | 2            | 2.9998 | 0.1934 |
| LAQQLTMER                        | 1090.3             | 2            | 3.1927 | 0.2123 |
| LAQQMENRPSVQAALK                 | 1785.1             | 2            | 4.0983 | 0.2583 |
| LAQQQAALLMQEER                   | 1758.0             | 3            | 3.3994 | 0.1742 |
| LAQQYYLVYQEPITPAQLVQR            | 2522.9             | 2            | 5.088  | 0.4617 |
| LAQSAEMYHYQHQR                   | 1762.9             | 2            | 4.6227 | 0.3864 |
| LAQSEYQLLADIPEHHQK               | 2234.5             | 3            | 3.9314 | 0.3404 |
| LAQSNWGWVMVSHR                   | 1542.7             | 2            | 2.5794 | 0.1076 |
| LAQTLSTQLFQMVHTQR                | 2003.3             | 3            | 3.6308 | 0.2855 |
| LAQVQVQKDSK                      | 1244.4             | 2            | 2.6659 | 0.148  |
| LAQYEPPEEKRAE                    | 1688.8             | 2            | 3.3292 | 0.2431 |
| LAQYESK                          | 838.9              | 1            | 2.1538 | 0.1759 |
| LAQYESKK                         | 967.1              | 2            | 2.6547 | 0.1656 |
| LARDDQIHILK                      | 1322.5             | 3            | 3.8074 | 0.1201 |
| LARDEGWLAEHMLILGITSPAGK          | 2479.9             | 3            | 3.7086 | 0.1768 |
| LASAAYPDPSK                      | 1120.2             | 2            | 2.8229 | 0.1251 |
| LASALAHNPNSGLHTINLAGNPLEDR       | 2697.0             | 3            | 4.8283 | 0.4113 |
| LASDHKDIHSSVSR                   | 1552.7             | 2            | 3.2851 | 0.383  |
| LASDLLEWIR                       | 1216.4             | 2            | 3.9561 | 0.2409 |
| LASDSAESDSR                      | 1253.2             | 2            | 3.021  | 0.4126 |
| LASDTEDNDEALAEILQANDNLTQVINLYK   | 3335.6             | 3            | 4.309  | 0.2409 |
| LASEAKPAAVAAENEEIGSHIK           | 2236.5             | 3            | 6.7571 | 0.5461 |
| LASEILMQNWDAAEMDLTR              | 2208.5             | 3            | 4.3278 | 0.39   |
| LASFSPSPSPYPTTVGPPVESSGLR        | 2531.8             | 3            | 3.3259 | 0.2943 |
| LASGETVAAFCLTEPSSGSDAASIR        | 2441.7             | 2            | 4.0169 | 0.3294 |
| LASGVEGSDIPDDGKLIGFAQLSIS        | 2490.7             | 2            | 2.9151 | 0.1846 |
| LASHLNLMCHLK                     | 1451.8             | 3            | 4.5721 | 0.4019 |

| Peptide Sequence                          | Peptide mass (m/z) | Charge State | Xcorr  | DelCn2 |
|-------------------------------------------|--------------------|--------------|--------|--------|
| LASIVEQVSVLQNGQR                          | 1742.0             | 3            | 4.4656 | 0.3102 |
| LASKEESSNSSDSK                            | 1469.5             | 2            | 3.4035 | 0.2935 |
| LASLEELKR                                 | 1059.2             | 2            | 2.9825 | 0.1287 |
| LASLFPALFSR                               | 1222.5             | 2            | 2.9384 | 0.1593 |
| LASLMNLGMSSSLNQQGAHSALSSASTSSHNLQSIFNIGSR | 4206.6             | 3            | 5.6299 | 0.4785 |
| LASQANIAQVLAELKEYATEVDVDFVR               | 2994.3             | 3            | 3.6124 | 0.3314 |
| LASQGDSISSQLGPIHPPPR                      | 2058.3             | 3            | 4.484  | 0.3766 |
| LASSEGFQKPSASLSQLESQNQLLQER               | 2977.2             | 3            | 5.3177 | 0.2937 |
| LASTLVHLGEYQAAVDGAR                       | 1972.2             | 3            | 5.1115 | 0.5255 |
| LASVLGSEPSLDSEVTSK                        | 1820.0             | 2            | 4.5234 | 0.4459 |
| LASVPAGGAVAVSAAPGSAAPAAGSAPAAAEK          | 2776.1             | 3            | 5.9391 | 0.5591 |
| LASVPAGGAVAVSAAPGSAAPAAGSAPAAAEKDEK       | 3276.6             | 3            | 4.4496 | 0.4173 |
| LASVSADAEVAR                              | 1189.3             | 2            | 3.8283 | 0.2136 |
| LASYLDK                                   | 809.9              | 1            | 2.1742 | 0.119  |
| LASYLDKVR                                 | 1065.2             | 2            | 3.2039 | 0.2044 |
| LATALQKLEEAKEK                            | 1444.7             | 2            | 3.4843 | 0.1628 |
| LATALQKLEEAKEKADESER                      | 2203.4             | 2            | 5.5779 | 0.4961 |
| LATALQKLEEAKEKADESERGMK                   | 2519.8             | 2            | 5.3613 | 0.4047 |
| LATATFAGIENK                              | 1236.4             | 2            | 3.5532 | 0.3133 |
| LATDKNDPHLCDFIETHYLNEQVK                  | 2845.1             | 3            | 5.8788 | 0.3503 |
| LATFWYYAK                                 | 1163.3             | 2            | 3.1593 | 0.2552 |
| LATLETEAAQHQA VVDGLTR                     | 2124.3             | 3            | 4.6288 | 0.2324 |
| LATLGGSQALGLDGEIGNFEVVGKEFDAILINPK        | 3388.8             | 3            | 5.8496 | 0.4341 |
| LATNAAVTVLR                               | 1129.3             | 2            | 2.8615 | 0.2902 |
| LATNTSAPDLK                               | 1131.3             | 2            | 3.6176 | 0.3296 |
| LATNTSAPDLKNVR                            | 1500.7             | 2            | 2.9454 | 0.2462 |
| LATPEDKQDIDKQYVGFATLPNQVHR                | 2985.3             | 3            | 5.2641 | 0.347  |
| LATPTYGDLNHLVSATMSGVTTSLR                 | 2606.9             | 3            | 4.9505 | 0.425  |
| LATPTYGDLNHLVSATMSGVTTSLRFPGQLNADLR       | 3719.2             | 3            | 4.659  | 0.3536 |
| LATPTYGDLNHLVSATMSGVTTSLRFPGQLNADLRK      | 3847.4             | 3            | 3.2192 | 0.2016 |
| LATQLTGPVMPVR                             | 1383.7             | 2            | 2.7645 | 0.1517 |
| LATQSNEITIPVTFESR                         | 1907.1             | 2            | 4.3407 | 0.3909 |
| LAVAGEDAR                                 | 902.0              | 2            | 2.5677 | 0.2134 |
| LAVATFAGIENK                              | 1234.4             | 2            | 4.498  | 0.4389 |
| LAVEALSSLDGDLAGR                          | 1587.8             | 2            | 5.5573 | 0.4937 |
| LAVISNFDR                                 | 1035.2             | 2            | 2.5921 | 0.1151 |

| Peptide Sequence                | Peptide mass (m/z) | Charge State | Xcorr  | DelCn2 |
|---------------------------------|--------------------|--------------|--------|--------|
| LAVLKEENDKKR                    | 1443.7             | 3            | 3.6135 | 0.2663 |
| LAVLSSSLTHWK                    | 1342.6             | 2            | 2.8686 | 0.264  |
| LAVMSVDLGSESMK                  | 1467.7             | 2            | 4.3342 | 0.4551 |
| LAVNCFVNNNR                     | 1264.4             | 2            | 2.5907 | 0.1122 |
| LAVNMVPFPR                      | 1144.4             | 2            | 4.0343 | 0.3825 |
| LAVNNIAGIEEVNMIKDDGTVIHFNPK     | 3067.5             | 3            | 5.2318 | 0.3422 |
| LAVQQVEEAQQLREHQEALHQQR         | 2770.0             | 3            | 4.7876 | 0.3474 |
| LAVYIDKVR                       | 1077.3             | 2            | 3.1653 | 0.2951 |
| LAVYIDR                         | 850.0              | 1            | 1.7407 | 0.131  |
| LAVYIDRVR                       | 1105.3             | 2            | 3.0167 | 0.1759 |
| LAWMGTWEHLVSTGFNQMR             | 2265.6             | 2            | 2.5904 | 0.1173 |
| LAWVGDVFTATPAEPRPLTSPLR         | 2495.9             | 3            | 3.8844 | 0.3826 |
| LAWVSHDSTVSVADASK               | 1773.9             | 2            | 4.1869 | 0.3999 |
| LAYELYTEALGIDPNNIK              | 2038.3             | 2            | 2.5882 | 0.1419 |
| LAYINPDLALEEK                   | 1489.7             | 2            | 4.2541 | 0.2746 |
| LAYQDKGVLHNEVK                  | 1614.8             | 2            | 4.4911 | 0.3263 |
| LAYQELQIDR                      | 1249.4             | 2            | 3.4561 | 0.1461 |
| LCDKTTPTGWTLDCIQGTGVDNPGHPIK    | 3187.6             | 3            | 4.2644 | 0.2826 |
| LCEAICPAQAITIEAEPR              | 1929.3             | 2            | 5.2448 | 0.3352 |
| LCLQQGQLCEPLPSLAESR             | 2086.4             | 2            | 3.73   | 0.1003 |
| LCQPEGIHICDGTEAENTATLTLLEQQGLIR | 3368.8             | 3            | 5.7098 | 0.2663 |
| LCYVALDFEQEMATAASSSSLEK         | 2494.8             | 2            | 6.5647 | 0.4895 |
| LCYYIGATDDAATK                  | 1505.7             | 2            | 2.8458 | 0.1578 |
| LDAAGFWQVWQR                    | 1477.7             | 2            | 4.4711 | 0.439  |
| LDADPSLQR                       | 1015.1             | 2            | 2.9412 | 0.1913 |
| LDADYPLR                        | 963.1              | 2            | 2.6826 | 0.244  |
| LDAEPRPPPTQEAA                  | 1492.6             | 2            | 3.7083 | 0.3763 |
| LDAGNQLALIEELHKEIR              | 2063.3             | 3            | 3.6259 | 0.1912 |
| LDALQTFIR                       | 1077.3             | 2            | 2.572  | 0.218  |
| LDALSNFHFIPKPPVPEIK             | 2163.5             | 3            | 4.0355 | 0.3923 |
| LDALVAEEHLTVDAR                 | 1652.8             | 2            | 4.2764 | 0.445  |
| LDAQVQELHAK                     | 1252.4             | 2            | 3.4981 | 0.2771 |
| LDDFDELSEVAQK                   | 1509.6             | 2            | 4.2592 | 0.3361 |
| LDDFVETGDIR                     | 1280.4             | 2            | 4.0554 | 0.4095 |
| LDDLVTGK                        | 948.1              | 2            | 2.542  | 0.2046 |
| LDDSDREGSVK                     | 1221.3             | 2            | 2.8084 | 0.2093 |

| Peptide Sequence                      | Peptide mass (m/z) | Charge State | Xcorr  | DelCn2 |
|---------------------------------------|--------------------|--------------|--------|--------|
| LDEEAENLVATVVPTHLAAAVPEVAVYLK         | 3063.5             | 2            | 4.7374 | 0.4963 |
| LDEEAENLVATVVPTHLAAAVPEVAVYLKESVGNSTR | 3894.3             | 3            | 4.7195 | 0.2382 |
| LDEL RDEGKASSAK                       | 1519.6             | 2            | 4.1974 | 0.3419 |
| LDEREAGITEK                           | 1261.4             | 2            | 2.5614 | 0.1848 |
| LDEREAGITEKVVFEQTK                    | 2093.3             | 3            | 4.1946 | 0.1727 |
| LDGLVETPTGYIESLPR                     | 1861.1             | 2            | 5.1407 | 0.4367 |
| LDGTEVNGR                             | 961.0              | 2            | 2.4322 | 0.2497 |
| LDGVSSHALSDSSTEFMHQIIDQVLQGGPGK       | 3255.6             | 3            | 5.1643 | 0.3349 |
| LDHFNFER                              | 1078.2             | 2            | 2.5398 | 0.2991 |
| LDHHPWFNVVYK                          | 1699.8             | 3            | 5.5159 | 0.3692 |
| LDHKFDLMYAK                           | 1381.6             | 3            | 4.6014 | 0.2756 |
| LDHKFDLMYAKR                          | 1537.8             | 3            | 4.0645 | 0.3793 |
| LDHLAEK                               | 825.9              | 2            | 2.4555 | 0.1638 |
| LDHSTDFSEAFEHNGRPYSLLVYIPSR           | 3299.6             | 3            | 5.2101 | 0.5168 |
| LDHYAIKFLTTESAMK                      | 2079.4             | 2            | 4.2222 | 0.3715 |
| LDIDPETITWQR                          | 1487.6             | 2            | 4.212  | 0.3004 |
| LDIDSPITAR                            | 1198.4             | 2            | 4.0391 | 0.3387 |
| LDIKLDSEDKDKEGKPLLK                   | 2185.5             | 3            | 4.6509 | 0.2907 |
| LDILDTAGQEEFGAMR                      | 1767.0             | 2            | 3.2225 | 0.3332 |
| LDINLLDNVNVNCLYHGEGAQQR               | 2485.8             | 3            | 3.4124 | 0.1455 |
| LDKAQIHDLVLVGGSTR                     | 1823.1             | 2            | 4.8789 | 0.4834 |
| LDKDNLSYIEHIFEISR                     | 2093.3             | 3            | 4.9648 | 0.3439 |
| LDKEKAETLASSLQEDLAHTR                 | 2356.6             | 3            | 4.0812 | 0.1632 |
| LDKENALDRAEQAEADKK                    | 2045.2             | 2            | 4.5475 | 0.3495 |
| LDKESYPVFYLF                          | 1677.9             | 2            | 3.6873 | 0.3146 |
| LDKKKYPYWPHQPIENL                     | 2170.5             | 2            | 2.7676 | 0.1398 |
| LDKLNQSFQGTDLPLVDHQVEEHNIFHNEVK       | 3632.0             | 3            | 5.2975 | 0.3302 |
| LDKSIQHDLVLVGGSTR                     | 1839.1             | 3            | 5.7176 | 0.4588 |
| LDLAGRDLTDYLMK                        | 1624.9             | 2            | 3.2917 | 0.2252 |
| LDLDTADSQPPVFK                        | 1659.9             | 2            | 4.9401 | 0.4624 |
| LDLEKKVESLLDELAFVR                    | 2118.5             | 3            | 3.331  | 0.314  |
| LDLERETIELVHTEPTDVAQLPSRVPR           | 3115.5             | 3            | 4.7891 | 0.2775 |
| LDLERKVESLQEEIAFLKK                   | 2289.7             | 3            | 3.3167 | 0.1757 |
| LDLGEDYPSGK                           | 1194.3             | 2            | 3.104  | 0.3418 |
| LDLHVIPVWQK                           | 1348.6             | 2            | 3.2378 | 0.2298 |
| LDLIAQQMMPEVR                         | 1544.9             | 2            | 3.9817 | 0.3758 |

| Peptide Sequence              | Peptide mass (m/z) | Charge State | Xcorr  | DelCn2 |
|-------------------------------|--------------------|--------------|--------|--------|
| LDLIHESILHK                   | 1318.5             | 2            | 2.6654 | 0.1725 |
| LDLLEDR                       | 874.0              | 2            | 2.4992 | 0.1051 |
| LDLMDEGTDAR                   | 1236.3             | 2            | 2.8857 | 0.1874 |
| LDLNDLAR                      | 930.0              | 2            | 2.9971 | 0.1656 |
| LDLQWVQVLSEGWATPLK            | 2084.4             | 2            | 3.1305 | 0.1938 |
| LDLSKNKLQQLPADFGR             | 1944.2             | 3            | 3.625  | 0.2365 |
| LDNNKELAFFANALEEVSIETIEAGFMTK | 3246.6             | 3            | 4.6896 | 0.3509 |
| LDNSSSGASVVAIDNKIEQAMDLVK     | 2605.9             | 3            | 4.7045 | 0.3381 |
| LDNVPHTPSSYIETLPK             | 1912.1             | 3            | 4.7985 | 0.4301 |
| LDNYDAPDIANIAISNELFEEFAIFR    | 3073.4             | 2            | 2.5436 | 0.2725 |
| LDPAALAAQLVPAPVPAAALR         | 2026.4             | 2            | 3.7979 | 0.3293 |
| LDPGSEETQTLVR                 | 1445.6             | 2            | 3.4643 | 0.3457 |
| LDPHLVLDQLR                   | 1319.5             | 2            | 2.7395 | 0.3971 |
| LDPIQPSDVLSLLDNR              | 1796.0             | 2            | 2.7459 | 0.172  |
| LDPSIFESLQK                   | 1277.4             | 2            | 2.8112 | 0.2395 |
| LDPTGTFEKEMIGR                | 1594.8             | 2            | 4.4918 | 0.4631 |
| LDQGGAPLAGTNK                 | 1242.4             | 2            | 2.7559 | 0.2554 |
| LDQGGAPLAGTNKETTIQGLDGLSER    | 2642.9             | 3            | 5.2818 | 0.4534 |
| LDQIHETK                      | 984.1              | 2            | 2.6337 | 0.1252 |
| LDQLIYIPLPDEK                 | 1557.8             | 2            | 4.4975 | 0.3029 |
| LDQLIYIPLPDEKSR               | 1801.1             | 2            | 3.858  | 0.1993 |
| LDQPMTEIVSR                   | 1289.5             | 2            | 3.8867 | 0.3172 |
| LDQWLTTMLLR                   | 1390.7             | 2            | 4.1681 | 0.3167 |
| LDRDSL VHSSPHVALSHVDAR        | 2312.5             | 3            | 5.7109 | 0.4074 |
| LDSDRVSSASSTAER               | 1581.6             | 3            | 3.8538 | 0.2676 |
| LDSEDKDKEGKPLLK               | 1715.9             | 3            | 4.2175 | 0.2716 |
| LDSGKELHINLIPNKQDR            | 2091.4             | 3            | 4.7384 | 0.3371 |
| LDSHFAGLFTHR                  | 1401.6             | 2            | 3.031  | 0.3228 |
| LDSKVNIPIIAK                  | 1424.8             | 2            | 4.0531 | 0.1375 |
| LDSQKHIDFSLR                  | 1459.6             | 2            | 3.4043 | 0.4097 |
| LDSTQVGDFLGDSAR               | 1581.7             | 2            | 2.7207 | 0.1163 |
| LDSVIEFSIPDSLLIR              | 1818.1             | 2            | 2.9115 | 0.1975 |
| LDTGKTFQAVMR                  | 1367.6             | 2            | 3.6005 | 0.3552 |
| LDTGPQSLSGK                   | 1103.2             | 2            | 3.229  | 0.3361 |
| LDTLSAEKDALSGAVR              | 1646.8             | 2            | 4.1752 | 0.256  |
| LDTSQWPLLLK                   | 1314.6             | 2            | 2.8693 | 0.1203 |

| Peptide Sequence                          | Peptide mass (m/z) | Charge State | Xcorr  | DelCn2 |
|-------------------------------------------|--------------------|--------------|--------|--------|
| LDVATDNFFQNPELYIR                         | 2056.3             | 2            | 3.4307 | 0.4227 |
| LDVGNAEVKLEENR                            | 1715.8             | 2            | 4.7584 | 0.4267 |
| LDVGNFSWGSECCTR                           | 1674.8             | 2            | 2.6146 | 0.1125 |
| LDVMMETENR                                | 1238.4             | 2            | 3.5515 | 0.3668 |
| LDVPVWDVEATLNFLK                          | 1860.1             | 2            | 3.0232 | 0.3579 |
| LDVTILSPSR                                | 1101.3             | 2            | 3.4182 | 0.2199 |
| LDVTTQTPLTPEQLR                           | 1712.9             | 2            | 3.9096 | 0.3595 |
| LDYDEDASAMK                               | 1371.5             | 2            | 3.8167 | 0.337  |
| LDYGQHVVAGTPGR                            | 1470.6             | 2            | 3.2402 | 0.145  |
| LDYLSSLK                                  | 939.1              | 2            | 2.4566 | 0.1717 |
| LDYNNIPTVVFSSHPIGTVGLTEDEAIHK             | 3178.5             | 3            | 3.7412 | 0.211  |
| LEAADEGSGDVK                              | 1191.2             | 2            | 3.3653 | 0.2736 |
| LEAALGEAK                                 | 902.0              | 1            | 2.2668 | 0.1292 |
| LEAALGEAKKQLQDEMLR                        | 2044.4             | 2            | 4.6913 | 0.4499 |
| LEAATQQNQQLR                              | 1400.5             | 2            | 3.4883 | 0.2307 |
| LEAAYLDLQR                                | 1192.3             | 2            | 3.2486 | 0.3065 |
| LEADLAQLSGEVEEAAQER                       | 2059.2             | 3            | 3.5465 | 0.2744 |
| LEAEEGRNSLSPVQATQKPLVSKK                  | 2610.9             | 3            | 4.5174 | 0.2409 |
| LEAEIATYR                                 | 1066.2             | 2            | 3.9539 | 0.311  |
| LEAELAAHEPAIQGVLDTGKK                     | 2191.5             | 3            | 3.7016 | 0.3229 |
| LEAELGNMQGLVEDFKNKYEDEINKR                | 3084.4             | 3            | 4.3766 | 0.4087 |
| LEAGDKKPKDAK                              | 1172.3             | 2            | 3.2286 | 0.2063 |
| LEALDANSR                                 | 989.1              | 2            | 3.0551 | 0.253  |
| LEALKTPGTWNHITDQIGMFSFTGLNPK              | 3118.6             | 3            | 5.5354 | 0.427  |
| LEANHGLLVAR                               | 1193.4             | 2            | 3.292  | 0.2823 |
| LEAPDADELPGGEFDPGQDTYQHPPKDSSGQHVDVSPTSQR | 4477.7             | 3            | 3.8866 | 0.23   |
| LEAVSHTSDMHR                              | 1383.5             | 2            | 3.8528 | 0.3923 |
| LEDDAKDNQQK                               | 1304.3             | 2            | 3.6645 | 0.2921 |
| LEDEAAAQALIGGR                            | 1414.5             | 2            | 3.0126 | 0.3071 |
| LEDEFDMFALTR                              | 1487.7             | 2            | 3.0652 | 0.1992 |
| LEDEIDFLAQELAR                            | 1662.8             | 2            | 5.1461 | 0.3245 |
| LEDEIDFLAQELARK                           | 1791.0             | 2            | 2.9935 | 0.164  |
| LEDGTEFDSSLPQNQPFFVSLGTGQVIK              | 3055.3             | 2            | 4.6084 | 0.3714 |
| LEDLIVKDGLTDVYNK                          | 1836.1             | 2            | 4.4257 | 0.3397 |
| LEDLLQDAQDEKEQLNEYKGHLSGLAK               | 3086.4             | 3            | 5.0583 | 0.3158 |
| LEDQLQGGQLEEVILQAEHELNLAR                 | 2847.1             | 3            | 3.3945 | 0.1462 |

| Peptide Sequence              | Peptide mass (m/z) | Charge State | Xcorr  | DelCn2 |
|-------------------------------|--------------------|--------------|--------|--------|
| LEDTENWLYEDGEDQPK             | 2082.1             | 2            | 4.9698 | 0.4483 |
| LEDVKNSTPK                    | 1278.4             | 2            | 2.6369 | 0.2588 |
| LEDVLPLAFTR                   | 1274.5             | 2            | 3.8159 | 0.3352 |
| LEEAKEKADESER                 | 1477.5             | 2            | 4.4698 | 0.3836 |
| LEEAKEKADESERGMK              | 1793.9             | 3            | 3.603  | 0.2764 |
| LEEASLLHQFQADADDIDAWMLDILK    | 3002.3             | 2            | 2.6227 | 0.2123 |
| LEEELDDLLVDLDHQR              | 1953.1             | 2            | 5.5594 | 0.3264 |
| LEEFMAANNLELVPESLCRCPK        | 2622.0             | 3            | 4.7401 | 0.3096 |
| LEEHYELR                      | 1089.2             | 2            | 2.488  | 0.1135 |
| LEEIEADKAPAR                  | 1342.5             | 2            | 3.0612 | 0.2793 |
| LEEKVEHLEEGPMIEQLSK           | 2239.5             | 3            | 4.1493 | 0.3328 |
| LEELDADKAEMR                  | 1420.6             | 2            | 2.842  | 0.1787 |
| LEELKESILADK                  | 1388.6             | 2            | 2.9811 | 0.1834 |
| LEENNHKTEA                    | 1185.2             | 2            | 2.7717 | 0.1971 |
| LEEPEEPKVLTPPEQLADKLR         | 2464.8             | 3            | 4.5917 | 0.4117 |
| LEEPTPAPSTSYSPQADSLR          | 2147.3             | 2            | 3.1882 | 0.3584 |
| LEEQAQHKADIEER                | 1767.9             | 2            | 4.3795 | 0.3446 |
| LEEQLLENLIEFIR                | 1646.9             | 2            | 3.9961 | 0.3347 |
| LEETQALLR                     | 1073.2             | 2            | 2.8901 | 0.1085 |
| LEEVKDKDGKPLLPK               | 1710.0             | 2            | 4.3852 | 0.2905 |
| LEEYKKEQAINR                  | 1521.7             | 2            | 4.1553 | 0.2484 |
| LEEYTGMMK                     | 1203.4             | 2            | 2.8906 | 0.1241 |
| LEFLYDKLR                     | 1197.4             | 2            | 2.9045 | 0.2653 |
| LEFLYDKLREQTLSPITISGLHNIAR    | 3017.4             | 3            | 6.4318 | 0.4253 |
| LEFTAHVLSQKFEK                | 1677.9             | 2            | 4.0121 | 0.328  |
| LEGDTLIIPR                    | 1127.3             | 2            | 2.7624 | 0.2336 |
| LEGENTQDKNK                   | 1276.3             | 2            | 3.2516 | 0.1119 |
| LEGFHTQISK                    | 1160.3             | 2            | 2.5753 | 0.1044 |
| LEGGEVDLKGPK                  | 1242.4             | 2            | 2.6642 | 0.153  |
| LEGGSGGDSEVQR                 | 1291.3             | 2            | 3.8901 | 0.4162 |
| LEGGSGGDSEVQRTMLELLNQLDGFQATK | 3096.4             | 3            | 3.5595 | 0.2266 |
| LEGHKEGIVQTEQIR               | 1737.9             | 2            | 4.3667 | 0.2838 |
| LEGLGSSEADQDGLASTVR           | 1906.0             | 2            | 5.4649 | 0.5361 |
| LEGLTDEFEELEFLSTINVGLTSIANLPK | 3194.6             | 2            | 2.8259 | 0.2875 |
| LEGLTDEINFLR                  | 1420.6             | 2            | 4.6244 | 0.3889 |
| LEGNPQGSNQGPK                 | 1415.5             | 2            | 3.8875 | 0.2706 |



| Peptide Sequence                 | Peptide mass (m/z) | Charge State | Xcorr  | DelCn2 |
|----------------------------------|--------------------|--------------|--------|--------|
| LEGQEEEEEDNR                     | 1348.3             | 2            | 3.4272 | 0.1698 |
| LEGQEEEEEDNRDSSM                 | 1768.8             | 2            | 4.3477 | 0.3794 |
| LEGQEEEEEDNRDSSMK                | 1896.9             | 2            | 4.3878 | 0.363  |
| LEGQEEEEEDNRDSSMKLS              | 2097.2             | 2            | 4.3441 | 0.3977 |
| LEGQGDVPTPK                      | 1141.3             | 2            | 2.6111 | 0.135  |
| LEGSDVQLLEYEASAAGLIR             | 2135.4             | 2            | 4.0585 | 0.3381 |
| LEGTNVQEAQKILNNSGLPITSAIDLEDAAKK | 3382.8             | 3            | 5.599  | 0.4314 |
| LEGVLAEVAQHYPQDTLIR              | 2056.3             | 3            | 5.2728 | 0.4434 |
| LEHDVNIQFPDKDDGNQPQDQITITGYEK    | 3359.6             | 3            | 6.604  | 0.4035 |
| LEHEYIHNFK                       | 1330.5             | 2            | 2.8045 | 0.2192 |
| LEHEYIQNFK                       | 1321.5             | 2            | 3.3585 | 0.2933 |
| LEHLITELVHQR                     | 1488.7             | 2            | 3.1863 | 0.2421 |
| LEHLSVSHNNLTTLHGELSSLPSLR        | 2756.1             | 3            | 6.3134 | 0.521  |
| LEHPVLHVSWNDAR                   | 1673.9             | 2            | 4.0047 | 0.3941 |
| LEHTHFFSR                        | 1174.3             | 2            | 2.8283 | 0.3737 |
| LEILQIHTK                        | 1095.3             | 2            | 3.143  | 0.1489 |
| LEKDLSFKDTQLKEYEELLASVR          | 2756.1             | 3            | 6.1383 | 0.45   |
| LEKHELIEFR                       | 1314.5             | 3            | 3.3782 | 0.2664 |
| LEKPAKYDDIK                      | 1320.5             | 2            | 2.6094 | 0.1757 |
| LEKPAKYDDIKK                     | 1448.7             | 2            | 3.6082 | 0.2181 |
| LEKPAKYDDIKKVVK                  | 1775.1             | 2            | 3.9314 | 0.2189 |
| LEKPPKEGVYELATFQMKPGGPALWGDAFK   | 3306.8             | 3            | 4.46   | 0.3153 |
| LELAQYREVAFAQFGSDLDAATQQLLSR     | 3213.5             | 3            | 4.0034 | 0.2189 |
| LELFLPEEYPMAAPK                  | 1749.1             | 2            | 3.8254 | 0.1762 |
| LELGNDWDSATKQLLGLQPISTVSPLHR     | 3090.5             | 3            | 5.7969 | 0.3158 |
| LELMDIIAENVLSEDR                 | 1861.1             | 2            | 3.0257 | 0.3169 |
| LELQGVKGGVDHAAAFGR               | 1826.0             | 2            | 4.7472 | 0.4841 |
| LEMDLKDLEAHIDSANKNRDEAIK         | 2770.1             | 3            | 3.4976 | 0.1112 |
| LENDQIESLR                       | 1217.3             | 2            | 3.6457 | 0.213  |
| LENGEIETIAR                      | 1245.4             | 2            | 3.3298 | 0.2542 |
| LENGELEHIRPK                     | 1435.6             | 2            | 3.5381 | 0.2816 |
| LENHQENSR                        | 1127.1             | 2            | 2.6451 | 0.1547 |
| LENLGIPEEEELLR                   | 1525.7             | 2            | 2.92   | 0.1341 |
| LENNDNKPVNTSR                    | 1501.6             | 2            | 4.4449 | 0.3665 |
| LENNENKPVNTSR                    | 1515.6             | 2            | 4.3435 | 0.2879 |
| LENTEDIEEVEQHIQTIK               | 2169.3             | 2            | 4.7782 | 0.316  |

| Peptide Sequence                         | Peptide mass (m/z) | Charge State | Xcorr  | DelCn2 |
|------------------------------------------|--------------------|--------------|--------|--------|
| LENVQKFPSPMIR                            | 1689.0             | 2            | 4.4991 | 0.2916 |
| LENYPIPEPGPNEVLLR                        | 1951.2             | 2            | 3.9756 | 0.3523 |
| LEPKPQPPVAEATPR                          | 1630.9             | 2            | 2.5434 | 0.1696 |
| LEPNAQAQMYR                              | 1321.5             | 2            | 2.7759 | 0.3038 |
| LEPQIASASEYAHR                           | 1572.7             | 2            | 3.9193 | 0.3176 |
| LEPVIMELER                               | 1229.5             | 2            | 2.4667 | 0.1648 |
| LEQDEYALR                                | 1137.2             | 2            | 3.0855 | 0.279  |
| LEQEHTNR                                 | 1027.1             | 2            | 2.6029 | 0.2387 |
| LEQEIATYR                                | 1123.2             | 2            | 3.9215 | 0.2736 |
| LEQGLSEHQR                               | 1197.3             | 2            | 2.4275 | 0.1911 |
| LEQGQAIDDLMPAQK                          | 1657.9             | 2            | 4.567  | 0.3933 |
| LEQIAAEQKANPDGK                          | 1612.8             | 2            | 4.4321 | 0.3568 |
| LEQIKKTELGAKE                            | 1358.6             | 2            | 4.4843 | 0.1533 |
| LEQKGAEADQIIEYLKQQVSLLEKEK               | 2903.3             | 3            | 4.496  | 0.222  |
| LEQLNQYPDFNNYLIFVLTK                     | 2473.8             | 3            | 5.5367 | 0.4147 |
| LEQPDPGAVAAAAAILR                        | 1592.8             | 2            | 4.5269 | 0.4696 |
| LEQQLVHVERPILR                           | 1731.0             | 2            | 3.0247 | 0.2348 |
| LEQQVPVNQVFGQDEMIDVIGVTK                 | 2688.1             | 3            | 4.9806 | 0.4056 |
| LEQVEKELLR                               | 1257.5             | 2            | 3.1493 | 0.125  |
| LEQVSSDEGIGTLAENLLEALR                   | 2358.6             | 2            | 4.5287 | 0.4032 |
| LEQY TSAIEGTK                            | 1340.5             | 2            | 3.9134 | 0.3502 |
| LESADKSDQNNTAEGK                         | 1707.7             | 2            | 4.1146 | 0.4102 |
| LESGMQNMSIHTK                            | 1476.7             | 2            | 4.5156 | 0.3751 |
| LESLEHQLR                                | 1125.3             | 2            | 2.9757 | 0.2279 |
| LESLNIQREKEELEQREAELQK                   | 2714.0             | 3            | 3.9719 | 0.2312 |
| LESLSAATTFEPLPVKDTDIQGFLKNEKDNALLSAIEESR | 4522.0             | 3            | 4.6379 | 0.3638 |
| LESLSYQLSGLQK                            | 1466.7             | 2            | 3.8875 | 0.362  |
| LESNKEGTR                                | 1034.1             | 2            | 3.2785 | 0.2782 |
| LESQHFFQIEK                              | 1396.5             | 2            | 3.4148 | 0.2333 |
| LETADKQSVHIVENEIQASIDQIFSR               | 2972.3             | 3            | 6.7691 | 0.5066 |
| LETPAPQV PAR                             | 1179.4             | 2            | 2.8256 | 0.2439 |
| LEVAPISDIIAIK                            | 1382.7             | 2            | 3.3017 | 0.2921 |
| LEVAPISDIIAIKSPDTFVR                     | 2185.5             | 2            | 5.5787 | 0.4153 |
| LEVEGAK                                  | 745.8              | 1            | 2.2325 | 0.1721 |
| LEVGIQAMEHLIHVLQTDR                      | 2203.6             | 3            | 4.3333 | 0.4304 |
| LEVLDSTK                                 | 905.0              | 1            | 1.7684 | 0.1328 |

| Peptide Sequence                       | Peptide mass (m/z) | Charge State | Xcorr  | DelCn2 |
|----------------------------------------|--------------------|--------------|--------|--------|
| LEVLDSTKSSR                            | 1235.4             | 2            | 2.7234 | 0.1842 |
| LEVNQLQAMK                             | 1046.3             | 2            | 2.5816 | 0.2151 |
| LEVQATDREENKQIALGTSK                   | 2231.4             | 3            | 4.4902 | 0.2039 |
| LEVSVDSDQKK                            | 1248.4             | 2            | 2.9244 | 0.2298 |
| LEYHQVIQQMEQK                          | 1674.9             | 2            | 3.8989 | 0.1529 |
| LFADAAAALQGFQTQVLGFIEEGEAAAMLGR        | 3126.5             | 3            | 6.0139 | 0.3888 |
| LFADAGLVCITSFISPFKA                    | 2001.4             | 2            | 3.825  | 0.333  |
| LFAGLVHVK                              | 984.2              | 2            | 3.4093 | 0.2264 |
| LFAQLAGDDMEVSATELMNILNK                | 2524.9             | 3            | 4.3846 | 0.2954 |
| LFAYPDTHR                              | 1120.2             | 2            | 2.65   | 0.2304 |
| LFDANKDR                               | 979.1              | 2            | 2.417  | 0.1249 |
| LFDDTREAQKVLHYLAIQKPADLAR              | 2914.3             | 3            | 4.3178 | 0.3372 |
| LFDFQGLQHVAHVATQLEAAR                  | 2480.8             | 3            | 6.0954 | 0.4741 |
| LFDHPESPTPNPTEPLFLAQAEVYK              | 2842.2             | 3            | 4.9349 | 0.3628 |
| LFDHPESPTPNPTEPLFLAQAEVYKELR           | 3240.6             | 3            | 6.2613 | 0.3882 |
| LFDIHKQVLK                             | 1241.5             | 2            | 2.8959 | 0.1397 |
| LFDPINLVFPPGGRNPPSSDELGGIHK            | 2909.3             | 3            | 3.5675 | 0.1659 |
| LFDPQLKEKPEEESLAAPTWLHLQQVER           | 3432.9             | 3            | 4.5195 | 0.263  |
| LFDQAFGLPR                             | 1164.3             | 2            | 3.8738 | 0.3691 |
| LFSDPITVTVPVEVSR                       | 1875.1             | 2            | 5.836  | 0.5217 |
| LFSDPITVTVPVEVSRK                      | 2003.3             | 3            | 3.3071 | 0.2694 |
| LFDSTTLEHQK                            | 1319.4             | 2            | 3.434  | 0.2722 |
| LFDYFPKYPNSEAAR                        | 1916.1             | 2            | 3.2952 | 0.3612 |
| LFEAEAQDLFR                            | 1339.5             | 2            | 3.3672 | 0.2789 |
| LFEAEAQDLFRDIQSLPQK                    | 2249.5             | 3            | 4.689  | 0.305  |
| LFEDTKYTTLIAK                          | 1543.8             | 2            | 3.2182 | 0.2124 |
| LFEETGHEDPITK                          | 1516.6             | 2            | 2.6441 | 0.1897 |
| LFEFAGYDVLRL                           | 1330.5             | 2            | 3.8905 | 0.3965 |
| LFEGNALLR                              | 1033.2             | 2            | 3.5282 | 0.2893 |
| LFKPLDSQSIYQLIEISR                     | 2280.6             | 3            | 5.7145 | 0.4477 |
| LFELEEQDLFRDIQGLPR                     | 2219.5             | 3            | 4.6379 | 0.4333 |
| LFENQLVGPESIAHIGDVMFTGTADGR            | 2876.2             | 3            | 5.1079 | 0.3951 |
| LFEYKEDSKLDYNNIPTVVFSHPPIGTVGLTEDEAIHK | 4318.8             | 3            | 5.4626 | 0.4836 |
| LFFAGEHTIR                             | 1191.4             | 2            | 2.462  | 0.2846 |
| LFFQPHQAGLSK                           | 1373.6             | 2            | 3.5492 | 0.3176 |
| LFGGFNSSDTVTSPQR                       | 1713.8             | 2            | 2.7475 | 0.1376 |

| Peptide Sequence                          | Peptide mass (m/z) | Charge State | Xcorr  | DelCn2 |
|-------------------------------------------|--------------------|--------------|--------|--------|
| LFGGNFAHQASVAR                            | 1475.6             | 2            | 4.7593 | 0.4365 |
| LFGHAQLIQSDDDIGDHQPFANAHDVLR              | 3202.4             | 3            | 5.621  | 0.4002 |
| LFGHSSTSALSAILR                           | 1560.8             | 2            | 4.6961 | 0.4837 |
| LFGTSPATEAAPPPEPVPAAEQPATVQSVEDFVPDDRDLDR | 4245.6             | 3            | 4.5949 | 0.4346 |
| LFGYEPTIYYPK                              | 1491.7             | 2            | 3.095  | 0.2564 |
| LFHTAPNVPHYAK                             | 1495.7             | 2            | 3.4426 | 0.2963 |
| LFIFHSSLPTAEAPGK                          | 1716.0             | 2            | 4.0193 | 0.3973 |
| LFIFHSSLPTAEAPGKLK                        | 1957.3             | 2            | 3.2186 | 0.4111 |
| LFIGGLNTETNEK                             | 1436.6             | 2            | 3.7592 | 0.2572 |
| LFIGGLNTETNEKALEAVFGK                     | 2252.6             | 2            | 4.8351 | 0.483  |
| LFIGGLNVQTSEGLR                           | 1691.9             | 2            | 4.5072 | 0.4316 |
| LFIGGLPNYLNDQVKELLTSFGPLK                 | 2893.3             | 3            | 5.1228 | 0.3496 |
| LFIGGLSFETTDDSLR                          | 1771.9             | 2            | 4.8298 | 0.3907 |
| LFIGGLSFETTDDSLREHF EK                    | 2442.7             | 2            | 4.2614 | 0.3712 |
| LFIGGLSFETTDES LR                         | 1786.0             | 2            | 5.8061 | 0.1464 |
| LFIGGLSFETTEES LR                         | 1800.0             | 2            | 5.3773 | 0.432  |
| LFIHESIHDDEVVNR                           | 1708.9             | 2            | 4.3303 | 0.4087 |
| LFKEVDGEGKPYEVR                           | 1930.1             | 2            | 4.927  | 0.3761 |
| LFKNQEDLLSEFGQFLPDANSSVLLSK               | 3041.4             | 3            | 4.168  | 0.1371 |
| LFKPGQEAVK                                | 1117.3             | 2            | 2.5374 | 0.1173 |
| LFLDRDLMTLPIQNK                           | 1818.2             | 2            | 4.0193 | 0.2246 |
| LFLFHTSLPIAEAPGK                          | 1742.1             | 2            | 3.6725 | 0.4073 |
| LFLFHTSLPIAEAPGKLK                        | 1983.4             | 3            | 5.0461 | 0.3769 |
| LFLNEDDKPHNPMVNAGAIIVTSLIK                | 2837.3             | 3            | 6.4072 | 0.4609 |
| LFLNETQTQEITEDIPVKTLNMK                   | 2707.1             | 3            | 4.1493 | 0.2083 |
| LFLVQLQEK                                 | 1118.4             | 2            | 2.9374 | 0.1292 |
| LFNAIIHR                                  | 984.2              | 2            | 2.8578 | 0.1454 |
| LFNDSSPVVLEESWDALNAITK                    | 2449.7             | 2            | 3.9244 | 0.3589 |
| LFNDYGGGSF SFSNLIQAVTR                    | 2294.5             | 2            | 4.9323 | 0.3479 |
| LFNHANQEVQR                               | 1356.5             | 2            | 3.1058 | 0.1904 |
| LFNHLSAVSESIQALGWVAMAPKPGPYVK             | 3112.6             | 3            | 5.8049 | 0.4773 |
| LFNLSKEDDVR                               | 1336.5             | 2            | 2.93   | 0.2286 |
| LFNLSKEDDVRQYVVR                          | 1982.2             | 2            | 3.6646 | 0.3028 |
| LFNLVHQAYEVLSDPQTR                        | 2131.4             | 2            | 4.0694 | 0.2736 |
| LFNVDRHVGMVAVAGLLADAR                     | 2126.5             | 3            | 5.5958 | 0.3639 |
| LFPDIPIGYSGHETGIAISVAVALGAK               | 2769.2             | 3            | 4.4832 | 0.4041 |

| Peptide Sequence                    | Peptide mass (m/z) | Charge State | Xcorr  | DelCn2 |
|-------------------------------------|--------------------|--------------|--------|--------|
| LFPDTPLALDANK                       | 1415.6             | 2            | 2.7222 | 0.1403 |
| LFQCLLHR                            | 1030.3             | 2            | 2.5539 | 0.2016 |
| LFQEDDEIPLYLK                       | 1623.8             | 2            | 4.0334 | 0.1842 |
| LFQEDDEIPLYLKGGVADALLYR             | 2640.0             | 2            | 4.1403 | 0.3277 |
| LFQENSVLSSLPLNSLSR                  | 2005.3             | 2            | 5.4586 | 0.3157 |
| LFQLMVEHTPDEESIDWTK                 | 2319.6             | 3            | 4.327  | 0.3729 |
| LFQLYPR                             | 937.1              | 2            | 2.6645 | 0.154  |
| LFQPSIQLAR                          | 1173.4             | 2            | 3.1179 | 0.2274 |
| LFQQFGLTK                           | 1082.3             | 2            | 3.0239 | 0.2708 |
| LFQQIYSDGSDEVKR                     | 1785.9             | 2            | 4.8803 | 0.3409 |
| LFQVEYAIEAIK                        | 1424.7             | 2            | 4.4096 | 0.2806 |
| LFQVQGTGANNTK                       | 1378.5             | 2            | 4.4437 | 0.2355 |
| LFRPVAADGQLHTLGDLLK                 | 2065.4             | 3            | 4.0603 | 0.2879 |
| LFRPWLNMDR                          | 1348.6             | 3            | 3.4352 | 0.2309 |
| LFSASEFEDPLVGEDTER                  | 2042.1             | 2            | 3.4067 | 0.2579 |
| LFSGDVVLTAR                         | 1178.4             | 2            | 3.0637 | 0.122  |
| LFSQDHLVIYK                         | 1363.6             | 2            | 2.429  | 0.1498 |
| LFSQQQDVSNKVK                       | 1450.6             | 2            | 2.9865 | 0.1406 |
| LFTAESLIGLKNPEK                     | 1660.9             | 2            | 4.2465 | 0.3474 |
| LFTAESLIGLKNPEKSFVNSDVGVLK          | 2904.3             | 3            | 5.873  | 0.4293 |
| LFTEEELAR                           | 1108.2             | 2            | 2.9043 | 0.2536 |
| LFTEEELARYGGEEEDQPIYLAVK            | 2801.1             | 3            | 5.7677 | 0.3798 |
| LFTESTGVLALDKELGR                   | 1979.2             | 2            | 5.3212 | 0.4351 |
| LFTTMELMR                           | 1142.4             | 2            | 2.4042 | 0.1736 |
| LFTTTEQDEQGSK                       | 1484.5             | 2            | 2.6895 | 0.1462 |
| LFTVQIPHKR                          | 1239.5             | 2            | 3.3453 | 0.316  |
| LFVDKIR                             | 891.1              | 1            | 2.4634 | 0.1039 |
| LFVDKIREYK                          | 1311.6             | 2            | 2.8632 | 0.2182 |
| LFVGGIKEDTEEHHLR                    | 1881.1             | 2            | 4.8958 | 0.425  |
| LFVGGIKEDTEEHHLRDYFEEYGK            | 2913.1             | 3            | 5.9393 | 0.2987 |
| LFVGGIKEDTEEYNLR                    | 1884.1             | 2            | 4.4918 | 0.4336 |
| LFVGGIKEDTEEYNLRDYFEK               | 2566.8             | 3            | 4.1439 | 0.1745 |
| LFVGGGLKGDVAEGDLIEHFSQFGTVEK        | 2894.2             | 3            | 4.7028 | 0.3455 |
| LFVGGGLNFNTDEQALEDHFSSFGPISEVVVVK   | 3496.9             | 3            | 4.1941 | 0.2311 |
| LFVGGGLNFNTDEQALEDHFSSFGPISEVVVVKDR | 3768.1             | 3            | 4.61   | 0.3204 |
| LFVGGLSFDTNEQSLEQVFSK               | 2346.6             | 3            | 6.1294 | 0.4885 |

| Peptide Sequence                   | Peptide mass (m/z) | Charge State | Xcorr  | DelCn2 |
|------------------------------------|--------------------|--------------|--------|--------|
| LFVGMGLGKQQGEEDVRRLFQPFQGHIEECTVLR | 3734.3             | 3            | 3.205  | 0.1124 |
| LFVGNLPADITEDEFK                   | 1809.0             | 2            | 4.5102 | 0.4203 |
| LFVGNLPADITEDEFKR                  | 1965.2             | 2            | 4.8213 | 0.3461 |
| LFVGNLPADITEDEFKRLFAK              | 2424.8             | 2            | 3.1399 | 0.2538 |
| LFVGNLPPDITEEEMR                   | 1861.1             | 2            | 3.7275 | 0.4052 |
| LFVGNLPTDITEEDFK                   | 1839.0             | 2            | 4.8292 | 0.3991 |
| LFVGNLPTDITEEDFKR                  | 1995.2             | 2            | 4.527  | 0.34   |
| LFVTNDAATILR                       | 1334.5             | 2            | 3.8727 | 0.3532 |
| LFVTNDAATILRELEVQHPPAAK            | 2437.8             | 3            | 4.0995 | 0.3713 |
| LFVVPADAEQAR                       | 1316.5             | 2            | 2.836  | 0.1087 |
| LFVYDPNPPSSEVLR                    | 1848.0             | 2            | 4.7122 | 0.5145 |
| LFYADHPFIFLVR                      | 1638.9             | 2            | 4.3295 | 0.4535 |
| LFYLALPPTVYEAVTK                   | 1826.2             | 2            | 2.8982 | 0.1916 |
| LFYSTFATDDRK                       | 1464.6             | 2            | 3.1139 | 0.2677 |
| LFYSTFATDDRKEGMTAFVEK              | 2457.7             | 3            | 4.2782 | 0.2883 |
| LGAAPPEESAYVAGEK                   | 1621.7             | 2            | 3.2452 | 0.1792 |
| LGAAPPEESAYVAGEKR                  | 1777.9             | 2            | 4.1926 | 0.4711 |
| LGAASLGAEDPETQVVLINAVK             | 2196.5             | 3            | 4.3694 | 0.2556 |
| LGADAVGMSTVPEVIVAR                 | 1786.1             | 2            | 4.173  | 0.47   |
| LGADESEEEGR                        | 1192.2             | 2            | 3.0113 | 0.2608 |
| LGADVTAVEFLGHVGGVGIDMEISKNFQR      | 3061.5             | 3            | 6.4342 | 0.4999 |
| LGAEVYHTLK                         | 1131.3             | 2            | 3.0856 | 0.2573 |
| LGAGEGGEASVSPEK                    | 1388.5             | 2            | 3.1688 | 0.21   |
| LGAGPDGVVEIKR                      | 1341.5             | 2            | 3.4123 | 0.332  |
| LGAGYGLLSEAELEVVPPIAK              | 2143.5             | 2            | 3.535  | 0.306  |
| LGAGYPMGPFELLDYVGLDTTK             | 2358.7             | 2            | 5.4938 | 0.5429 |
| LGAHQLDSYSEDAK                     | 1534.6             | 2            | 3.4187 | 0.2144 |
| LGAMDIDTHKK                        | 1229.4             | 2            | 2.4777 | 0.1358 |
| LGANSLLDLVVFGR                     | 1474.7             | 2            | 4.4662 | 0.3999 |
| LGAPALTSR                          | 886.0              | 2            | 2.5225 | 0.1895 |
| LGAPQQPGPGPPPSR                    | 1456.6             | 2            | 3.6126 | 0.3372 |
| LGAQLADLHLDNK                      | 1408.6             | 2            | 3.8642 | 0.2246 |
| LGAQLADLHLDNKK                     | 1536.8             | 2            | 3.733  | 0.3237 |
| LGAQLADLHLDNKKLGEMR                | 2123.5             | 3            | 3.4819 | 0.2069 |
| LGAQSVYHLHIHVLGGR                  | 1858.1             | 2            | 5.0835 | 0.4231 |
| LGAVDESLSEETQK                     | 1506.6             | 2            | 4.7083 | 0.4598 |

| Peptide Sequence                   | Peptide mass (m/z) | Charge State | Xcorr  | DelCn2 |
|------------------------------------|--------------------|--------------|--------|--------|
| LGDAVEQGVINNTVLGYFIGR              | 2236.5             | 3            | 5.7524 | 0.3858 |
| LGDHGYDNSLPSMHPFLAAHGPAFHK         | 2818.1             | 3            | 4.7808 | 0.371  |
| LGDKHATLQK                         | 1111.3             | 2            | 2.587  | 0.1968 |
| LGDKIHGFTVNQVTSVPELFLTAVK          | 2715.1             | 3            | 4.3791 | 0.4703 |
| LGDKIHGFTVNQVTSVPELFLTAVKLTHDDTGAR | 3682.1             | 3            | 4.7181 | 0.2834 |
| LGDLWDYHQHR                        | 1440.5             | 2            | 2.7116 | 0.1883 |
| LGDLYEEEMR                         | 1255.4             | 2            | 3.5133 | 0.3153 |
| LGDPAEYAHLVQAIENPFLNGEVIR          | 2880.2             | 3            | 6.482  | 0.4513 |
| LGDPAEYAHLVQAIENPFLNGEVIRLDGAIR    | 3506.0             | 3            | 3.5657 | 0.2644 |
| LGDPVYDSTITESMDDMLSKVEAAYLR        | 3021.4             | 3            | 3.8399 | 0.3203 |
| LGDSHDLQR                          | 1041.1             | 2            | 2.9697 | 0.187  |
| LGDSQLVK                           | 860.0              | 2            | 3.2239 | 0.148  |
| LGSSSGPALKR                        | 1101.2             | 2            | 2.9748 | 0.1686 |
| LGDTPGVSYSDIAAR                    | 1522.6             | 2            | 3.9906 | 0.4138 |
| LGDTYPSISNAR                       | 1294.4             | 2            | 3.1757 | 0.2356 |
| LGDISIQPCPDVK                      | 1484.7             | 2            | 4.066  | 0.2864 |
| LGDVYVNDAFGTAHR                    | 1635.8             | 2            | 4.673  | 0.4099 |
| LGEDIVITAHVLK                      | 1408.7             | 2            | 3.1052 | 0.2171 |
| LGEDLNKWQALLVQIR                   | 1897.2             | 2            | 3.4949 | 0.2435 |
| LGEEDAGAR                          | 917.9              | 2            | 3.1454 | 0.3103 |
| LGEGEGSMTKEEFAK                    | 1613.8             | 2            | 3.28   | 0.3144 |
| LGEGEGSMTKEEFTK                    | 1643.8             | 2            | 3.6033 | 0.3426 |
| LGEHNIEVLEGNEQFINAAK               | 2226.4             | 2            | 6.3035 | 0.3362 |
| LGEIVTTIPTIGFNVETVEYK              | 2324.7             | 2            | 4.486  | 0.4115 |
| LGEKDTSLYRPALEELRR                 | 2147.4             | 3            | 3.7587 | 0.2034 |
| LGEKEETIPPDYRLEEVDKDKGKPLLPK       | 3238.7             | 3            | 3.9527 | 0.2604 |
| LGELFNPYYDPLQWK                    | 1884.1             | 3            | 4.7796 | 0.3207 |
| LGELILTSESSR                       | 1305.5             | 2            | 3.6568 | 0.2643 |
| LGELLFPSSLAGETLGSFSGLR             | 2252.6             | 3            | 4.4599 | 0.482  |
| LGELPSWILMR                        | 1315.6             | 2            | 3.9491 | 0.3165 |
| LGELQEKLSELKETVELKSQEAQSLQQQR      | 3371.7             | 3            | 3.8222 | 0.1563 |
| LGELTSQLHPVADSSPAGAK               | 2023.3             | 3            | 3.4038 | 0.1593 |
| LGELTSQLHPVADSSPAGAKWTETETIEMLR    | 3312.8             | 3            | 3.8252 | 0.1541 |
| LGEMWNNTAADDKQPYEK                 | 2111.3             | 2            | 4.9328 | 0.4601 |
| LGEMWNNTAADDKQPYEKK                | 2239.5             | 3            | 4.4009 | 0.2519 |
| LGEMWSEQSAK                        | 1266.4             | 2            | 3.176  | 0.2848 |

| Peptide Sequence                   | Peptide mass (m/z) | Charge State | Xcorr  | DelCn2 |
|------------------------------------|--------------------|--------------|--------|--------|
| LGENMILKR                          | 1074.3             | 2            | 2.4346 | 0.1958 |
| LGENNAELNALAK                      | 1357.5             | 2            | 4.0345 | 0.3288 |
| LGERDDTIPPEYR                      | 1561.7             | 2            | 2.8591 | 0.2925 |
| LGESQTLQQFSR                       | 1394.5             | 2            | 3.5235 | 0.2361 |
| LGESVQDLSSFDEYSSELK                | 2134.2             | 2            | 4.2435 | 0.2549 |
| LGESVQDLSSFDEYSSELKSGR             | 2434.6             | 3            | 3.7697 | 0.3169 |
| LGETYKDHENIVIAK                    | 1730.9             | 3            | 4.0599 | 0.3981 |
| LGEVVELLFPPVAR                     | 1539.8             | 2            | 2.6108 | 0.1008 |
| LGEVVNTHGPVEPKDNIR                 | 2090.3             | 3            | 4.6554 | 0.4219 |
| LGEYEDVSRVEK                       | 1424.5             | 2            | 3.1164 | 0.252  |
| LGFAGLVQEISFGTTK                   | 1668.9             | 2            | 3.0871 | 0.2966 |
| LGFAGLVQEISFGTTKDK                 | 1912.2             | 2            | 2.6382 | 0.178  |
| LGFDVVFNYK                         | 1202.4             | 2            | 2.7228 | 0.1698 |
| LGFEEDGSVLK                        | 1065.2             | 2            | 3.1663 | 0.226  |
| LGFEEDGSVLKQFLSETEKMSPEDR          | 2744.0             | 3            | 3.77   | 0.1102 |
| LGFEEDGSVLPFYIR                    | 1485.7             | 2            | 2.5872 | 0.1642 |
| LGFEEDGSVLPFYIRIPK                 | 1824.1             | 2            | 3.6684 | 0.3557 |
| LGFFTTYFLPLANTLK                   | 1847.2             | 2            | 4.4999 | 0.4119 |
| LGFGSFVEK                          | 984.1              | 2            | 2.6673 | 0.2731 |
| LGFHLPLEVAYQR                      | 1543.8             | 3            | 5.0778 | 0.3038 |
| LGFIKHELYSR                        | 1450.7             | 2            | 2.9739 | 0.3655 |
| LGFMFAFVK                          | 1000.2             | 2            | 3.0379 | 0.3157 |
| LGFESEVELVQMVVDGK                  | 1850.2             | 2            | 5.4736 | 0.4443 |
| LGFSNSNPAQDLERVPPGLLALDNMLYFSR     | 3336.8             | 3            | 3.6572 | 0.1595 |
| LGFEVAGVINR                        | 1046.2             | 2            | 3.4576 | 0.2051 |
| LGGAIAAINSIQHNTR                   | 1636.8             | 2            | 4.0813 | 0.3171 |
| LGGEAAHLPHLRPLPESQPSPLLTAPGVK      | 3286.7             | 3            | 3.6689 | 0.2287 |
| LGGGMPGLGQGPPTDAPAVDTAEQVYISSLALLK | 3325.8             | 3            | 5.4092 | 0.4269 |
| LGGHDDLHDDLQEDFHGHSHR              | 2438.5             | 3            | 5.2283 | 0.4052 |
| LGGHGPFPLK                         | 1110.3             | 2            | 2.8297 | 0.2936 |
| LGGHGPFPLKQITEQQKEGLEIVK           | 2664.1             | 3            | 5.2111 | 0.4008 |
| LGGIGQFLAK                         | 1004.2             | 2            | 3.5022 | 0.2473 |
| LGGKGYKLSPEDYTLK                   | 1770.0             | 3            | 4.228  | 0.3267 |
| LGGNEIVSFLK                        | 1177.4             | 2            | 2.4197 | 0.1867 |
| LGGNPGTNSR                         | 973.0              | 2            | 2.5027 | 0.1369 |
| LGGNVVVSLEGKPL                     | 1382.6             | 2            | 3.4791 | 0.3225 |



| Peptide Sequence                     | Peptide mass (m/z) | Charge State | Xcorr  | DelCn2 |
|--------------------------------------|--------------------|--------------|--------|--------|
| LGGNYGPTVLVQQEALKR                   | 1944.2             | 2            | 2.695  | 0.213  |
| LGGPEAGLGEYLFER                      | 1608.8             | 2            | 4.997  | 0.4805 |
| LGGPQASLSTK                          | 1059.2             | 2            | 2.5259 | 0.264  |
| LGGSAVISLEGKPL                       | 1341.6             | 2            | 5.2217 | 0.3797 |
| LGGSLADSYLDEGFLLDKK                  | 2042.3             | 2            | 4.9573 | 0.4377 |
| LGGSPFGPAGTGK                        | 1146.3             | 2            | 2.7778 | 0.259  |
| LGGSPSLGTWGSWIGPDHDKFSAMK            | 2734.0             | 3            | 4.1587 | 0.4541 |
| LGGSQEDQIK                           | 1075.2             | 2            | 2.7699 | 0.1844 |
| LGGSQEDQIKNAIDKLFVLFGAEILK           | 2848.3             | 3            | 5.2214 | 0.357  |
| LGGSQEDQIKNAIDKLFVLFGAEILKK          | 2976.5             | 3            | 4.8167 | 0.3197 |
| LGGVKYDIDLPNKK                       | 1560.8             | 2            | 3.8239 | 0.195  |
| LGHAETDEQLQNIISK                     | 1797.0             | 2            | 3.5945 | 0.3116 |
| LGHASDR                              | 755.8              | 1            | 2.1718 | 0.151  |
| LGHASDRIIALDGDTK                     | 1682.9             | 2            | 4.3511 | 0.4024 |
| LGHQLQQAGLK                          | 1194.4             | 2            | 2.7429 | 0.1906 |
| LGHFAPVDAVADQR                       | 1496.7             | 2            | 2.8041 | 0.1745 |
| LGHGLLSGEYSKPVPESGDGERVPEQK          | 2867.1             | 3            | 5.5753 | 0.4738 |
| LGHGLLSGEYSKPVPESGDGERVPEQKEVQDGIAPR | 3833.2             | 3            | 5.8847 | 0.4442 |
| LGHLLKKEEAEIQAELEK                   | 1994.2             | 2            | 2.8787 | 0.147  |
| LGHPEALSAGTGSPQPPSFTYAQQR            | 2598.8             | 3            | 5.3893 | 0.4177 |
| LGHQLAEIR                            | 1037.2             | 2            | 2.992  | 0.1248 |
| LGHFSFLVGNK                          | 1159.3             | 2            | 3.2384 | 0.3766 |
| LGHSHLSYLSVR                         | 1369.6             | 3            | 4.641  | 0.4266 |
| LGIEGLSLHNVLK                        | 1393.7             | 2            | 4.2318 | 0.3911 |
| LGIEKTDPTTLTDEEINRFAR                | 2420.7             | 3            | 3.6973 | 0.2662 |
| LGIHEDSQNR                           | 1169.2             | 2            | 2.9178 | 0.3351 |
| LGIHEDSQNRK                          | 1297.4             | 2            | 3.0021 | 0.2056 |
| LGIHEDSTNR                           | 1142.2             | 2            | 3.3157 | 0.3845 |
| LGIHEDSTNRR                          | 1298.4             | 2            | 2.4984 | 0.1051 |
| LGIHSALLDEKKDQDSK                    | 1898.1             | 3            | 3.8842 | 0.2107 |
| LGILDKVVNSDPVEEAIR                   | 1968.2             | 2            | 2.9716 | 0.1566 |
| LGILTHLYR                            | 1086.3             | 2            | 3.2219 | 0.1278 |
| LGINKTDPSTLTEEEVSK                   | 1962.1             | 3            | 3.5007 | 0.1807 |
| LGINKTDPSTLTEEEVSKFAR                | 2336.6             | 3            | 3.9697 | 0.2942 |
| LGINSLQELK                           | 1115.3             | 2            | 2.997  | 0.2091 |
| LGINSLQELKQNIK                       | 1669.9             | 2            | 3.5956 | 0.1762 |

| Peptide Sequence                        | Peptide mass (m/z) | Charge State | Xcorr  | DelCn2 |
|-----------------------------------------|--------------------|--------------|--------|--------|
| LGIPATIVLPESTSLQVVQR                    | 2122.5             | 3            | 4.6609 | 0.4431 |
| LGIQAEPLYR                              | 1160.3             | 2            | 2.7484 | 0.1668 |
| LGIQTDDKGHIIVDEFQNTNVK                  | 2485.7             | 3            | 6.2167 | 0.4384 |
| LGITHVLNAAEGR                           | 1351.5             | 2            | 4.119  | 0.3433 |
| LGIYDADGDGDFDVEDDAK                     | 1901.9             | 2            | 5.7752 | 0.5399 |
| LGIYDADGDGDFDVEDDAKVLLGLKER             | 2811.1             | 3            | 6.6423 | 0.5206 |
| LGKADIVQQLLQQGASPNAATTSGYTPLHLSAR       | 3408.8             | 3            | 7.3669 | 0.5291 |
| LGKDSGLKPFQVVK                          | 1546.8             | 2            | 4.7759 | 0.2834 |
| LGKEIEEYIHKPK                           | 1584.8             | 3            | 4.3236 | 0.178  |
| LGKSEAPETPMEEEAELVLTEK                  | 2431.7             | 3            | 4.1966 | 0.2983 |
| LGKSEVELVQLVIDGVNYLIDCER                | 2706.1             | 2            | 3.1395 | 0.194  |
| LGLDFPNLPYLIDGTHK                       | 1914.2             | 3            | 3.584  | 0.1769 |
| LGLDYEER                                | 995.1              | 1            | 2.2941 | 0.1534 |
| LGLDYEERVLPSIVNEVLK                     | 2187.5             | 3            | 3.6464 | 0.2361 |
| LGLDYEERVLPSIVNEVLKSVVAK                | 2672.1             | 3            | 5.1349 | 0.3407 |
| LGLDYSYDLAPR                            | 1383.5             | 2            | 3.2655 | 0.2771 |
| LGLEAKKEENLADWYSQVITK                   | 2436.7             | 2            | 2.6455 | 0.1924 |
| LLENAAELIR                              | 1199.4             | 2            | 3.237  | 0.2465 |
| LGLGEGAEK                               | 1003.1             | 2            | 2.5427 | 0.1487 |
| LGLGGNAPVSIPQQSQSVK                     | 1881.1             | 2            | 3.4023 | 0.3746 |
| LGLGHNQIR                               | 1008.2             | 2            | 2.7029 | 0.2174 |
| LGLGIDEDDPTADDTSAAVTEEMPPLEGDDDTSR      | 3549.6             | 3            | 6.691  | 0.5582 |
| LGLGIDEDDPTADDTSAAVTEEMPPLEGDDDTSRMEEVD | 4153.3             | 3            | 5.354  | 0.488  |
| LGLGIDEDEVAEEPNAAVPDEIPLEGDEDASR        | 3534.7             | 3            | 4.7938 | 0.4957 |
| LGLGILNNAFR                             | 1188.4             | 2            | 2.6668 | 0.2842 |
| LGLHYVVYSGLENIKK                        | 1834.2             | 3            | 3.622  | 0.2003 |
| LGLIEWLENTVTLKDLLLNTMSQEEK              | 3032.5             | 3            | 3.7756 | 0.1653 |
| LGLIPLISDDIVDKLQYSR                     | 2159.5             | 2            | 3.2577 | 0.3182 |
| LGLKEMDNAGQLVFLATEGDHLQLSEEFYAHIIIFLG   | 4304.9             | 3            | 3.6583 | 0.1701 |
| LGLKPLEVNAIKK                           | 1423.8             | 3            | 3.5978 | 0.2581 |
| LGLLDNHSSEFNVTR                         | 1702.8             | 2            | 3.8449 | 0.385  |
| LGLLGALMAEDGVR                          | 1415.7             | 2            | 2.948  | 0.3741 |
| LGLLGDSVDIFK                            | 1277.5             | 2            | 4.2061 | 0.3368 |
| LGLLGDSVDIFKGIPFAAPTK                   | 2160.5             | 2            | 4.6823 | 0.4069 |
| LGLLGLANSLAIEGR                         | 1497.8             | 2            | 4.5061 | 0.3922 |
| LGLLGLANSLAIEGRK                        | 1625.9             | 2            | 4.4681 | 0.4555 |

| Peptide Sequence              | Peptide mass (m/z) | Charge State | Xcorr  | DelCn2 |
|-------------------------------|--------------------|--------------|--------|--------|
| LGLMRDDTIYEDEDVKEAIR          | 2382.6             | 3            | 6.1399 | 0.3956 |
| LGLPGDEVDNKVK                 | 1384.6             | 2            | 3.1273 | 0.3235 |
| LGLPPLTPEQQEALQK              | 1763.0             | 3            | 4.0961 | 0.1122 |
| LGLQASDIK                     | 945.1              | 2            | 3.1309 | 0.2278 |
| LGLQNDFSLAR                   | 1347.5             | 2            | 3.8341 | 0.383  |
| LGLQYMELIPK                   | 1305.6             | 2            | 2.7397 | 0.254  |
| LGLSLVPPGGGIK                 | 1210.5             | 2            | 3.0885 | 0.3559 |
| LGLSTLGELKQNLRS               | 1629.9             | 3            | 3.8843 | 0.4315 |
| LGLSVFTHHR                    | 1167.3             | 2            | 2.7865 | 0.2531 |
| LGLTEIRK                      | 930.1              | 2            | 2.5402 | 0.1056 |
| LGLVFDDVVGIVEIINSK            | 1931.3             | 2            | 3.308  | 0.2389 |
| LGLVFDDVVGIVEIINSKDVK         | 2273.7             | 3            | 3.4435 | 0.2753 |
| LGLVGVNLTLDGVK                | 1398.7             | 2            | 4.4213 | 0.4582 |
| LGMIAGGTGITPMLQLIR            | 1843.3             | 2            | 4.452  | 0.3766 |
| LGNDFHTNKR                    | 1202.3             | 2            | 3.1936 | 0.2951 |
| LGNDFMGITLASSQAVSNAR          | 2053.3             | 2            | 5.1883 | 0.4289 |
| LGNFFSPK                      | 910.1              | 2            | 2.7191 | 0.2281 |
| LGNIEFKPESR                   | 1290.5             | 3            | 3.4098 | 0.2819 |
| LGNPTRSEDLIDYGPFR             | 1951.1             | 3            | 3.9066 | 0.2042 |
| LGNQNVETK                     | 1003.1             | 2            | 2.9938 | 0.2312 |
| LGNSADALESAKR                 | 1332.4             | 2            | 3.5898 | 0.2902 |
| LGNSHQPEKPLVR                 | 1475.7             | 3            | 3.3541 | 0.3307 |
| LGNTISSLFGGGTTPDAK            | 1736.9             | 2            | 4.033  | 0.349  |
| LGNTSEAHGAAR                  | 1184.2             | 2            | 3.6512 | 0.2564 |
| LGPALATGNVVVMK                | 1370.7             | 2            | 3.5622 | 0.2891 |
| LGPASAADTGSEAKPGALAEGAAEPEPQR | 2749.9             | 3            | 4.2616 | 0.1722 |
| LGPDDPNVAK                    | 1026.1             | 2            | 3.2289 | 0.3076 |
| LGPDDPNVAKTK                  | 1255.4             | 2            | 2.6286 | 0.1734 |
| LPGGLDDRYSLVSEQLPAATSTYR      | 2797.0             | 3            | 5.6694 | 0.285  |
| LPGGLDPVEVYESLPEELQK          | 2270.5             | 2            | 5.4409 | 0.5118 |
| LGPLFSLLENHR                  | 1510.7             | 2            | 3.3816 | 0.3734 |
| LGPLFSLLENHREK                | 1768.0             | 2            | 2.5854 | 0.1666 |
| LGPLLDILADSR                  | 1283.5             | 2            | 2.4956 | 0.1046 |
| LGPLLEQEIQSVPGVQTLLGAGR       | 2473.9             | 3            | 3.412  | 0.227  |
| LGPLQVAR                      | 854.0              | 1            | 1.8907 | 0.1401 |
| LGPNDQYKFYSVNVVDYSK           | 2138.3             | 3            | 3.3007 | 0.2022 |

| Peptide Sequence                        | Peptide mass (m/z) | Charge State | Xcorr  | DelCn2 |
|-----------------------------------------|--------------------|--------------|--------|--------|
| LGQAEKTELD AHLNLLSK                     | 2110.4             | 3            | 6.1017 | 0.4235 |
| LGQEATVGK                               | 903.0              | 2            | 2.9144 | 0.2875 |
| LGQGLGPIHLSEVR                          | 1476.7             | 2            | 2.9827 | 0.322  |
| LGQHVPTLHPTSEELTIAGMTFTTDFDLGGHEQAR     | 3694.1             | 3            | 4.8749 | 0.3659 |
| LGQHVPTLHPTSEELTIAGMTFTTDFDLGGHVQAR     | 3664.1             | 3            | 4.6181 | 0.3958 |
| LGQHVVGMAPLSVGS LDDEPGGEAETK            | 2695.0             | 3            | 6.4728 | 0.4843 |
| LGQLEEELEEEQSNSSELLNDR                  | 2475.6             | 2            | 4.7805 | 0.3957 |
| LGQLEGLLQAHGDEGCGACGGVQEELGR            | 2798.1             | 3            | 5.5215 | 0.4115 |
| LGQLNIDISNIK                            | 1328.5             | 2            | 2.9412 | 0.2579 |
| LGQMIVDYENPLKK                          | 1648.9             | 2            | 3.2189 | 0.2883 |
| LGQMVLSGVDTVLGK                         | 1517.8             | 2            | 4.6745 | 0.4014 |
| LGQMVLSGVDTVLGKSEEWADNHLPLTDAELAR       | 3567.0             | 3            | 6.4726 | 0.4943 |
| LGQSDPAPLQHQMDIYQK                      | 2070.3             | 2            | 4.703  | 0.4804 |
| LGREEPAMSM DANGK                        | 1606.8             | 2            | 3.7529 | 0.2808 |
| LGR L DAVLQR                            | 1141.3             | 2            | 2.9066 | 0.1555 |
| LGR L DQAVLDLQR                         | 1497.7             | 2            | 2.7972 | 0.2056 |
| LGRYNEEERAQQEAEAAQR                     | 2249.3             | 3            | 3.5815 | 0.2815 |
| LGSAADFLLDISETDLSSLTASIK                | 2468.7             | 2            | 5.3439 | 0.4547 |
| LGSDIKLEDSLWVSLTDQHVQLPMAMTAENLAVK      | 3755.3             | 3            | 4.9445 | 0.4046 |
| LGSDPQKK                                | 873.0              | 2            | 2.551  | 0.1032 |
| LGSGEPSHSVK                             | 1098.2             | 2            | 2.8216 | 0.305  |
| LGSGGHLHLR                              | 1047.2             | 2            | 2.6297 | 0.3036 |
| LGSGPDGAEI KR                           | 1329.4             | 2            | 3.2451 | 0.1953 |
| LGSIAIQGAIEK                            | 1200.4             | 2            | 4.4022 | 0.2805 |
| LGSIAIQGAIEKAGIPKEEVKEAYMGNVLQGGEGQAPTR | 4012.5             | 3            | 7.7184 | 0.4372 |
| LGSKDVVIK                               | 959.2              | 2            | 2.5055 | 0.1215 |
| LGSLALHNSESLDQEHA K                     | 1950.1             | 3            | 3.3222 | 0.3718 |
| LGSLVDEFK                               | 1008.2             | 2            | 2.7266 | 0.2576 |
| LGSLVDEFKELVYPPDYNPEGK                  | 2510.8             | 3            | 4.9083 | 0.4447 |
| LGSLVDEFKELVYPPDYNPEGKVTK               | 2839.2             | 3            | 4.0364 | 0.3267 |
| LGSLVDEFKELVYPPDYNPEGKVTKR              | 2995.4             | 3            | 5.4978 | 0.3808 |
| LGSLVENNER                              | 1131.2             | 2            | 3.0694 | 0.1835 |
| LGSLVENNERVFDHK                         | 1757.9             | 2            | 3.8094 | 0.333  |
| LGS MHSPFR                              | 1032.2             | 2            | 3.3067 | 0.413  |
| LGSPDEEFFHKVR                           | 1561.7             | 2            | 3.2366 | 0.3499 |
| LGSQHSPGR                               | 939.0              | 2            | 2.8737 | 0.2226 |

| Peptide Sequence                         | Peptide mass (m/z) | Charge State | Xcorr  | DelCn2 |
|------------------------------------------|--------------------|--------------|--------|--------|
| LGSSFTKVQDYLR                            | 1514.7             | 2            | 3.1641 | 0.3758 |
| LGSSGLGSASSIQA AVR                       | 1561.7             | 2            | 4.6519 | 0.4875 |
| LGSSSEIEVPAKTTHVLK                       | 1897.2             | 2            | 3.8173 | 0.3887 |
| LGSTAPQVLSTSSPAQQAENEAK                  | 2315.5             | 2            | 5.2179 | 0.5185 |
| LGSTEVASNVPK                             | 1202.3             | 2            | 3.106  | 0.2776 |
| LGSTIFVANLDFK                            | 1425.7             | 2            | 4.0628 | 0.3155 |
| LGSTV FVANLDYK                           | 1427.6             | 2            | 2.4221 | 0.1277 |
| LGTDDTVMK                                | 980.1              | 2            | 2.9521 | 0.3019 |
| LGTDDTVMKANLHK                           | 1543.8             | 2            | 2.9532 | 0.1555 |
| LGTFEVEDQIEAAR                           | 1578.7             | 2            | 3.8897 | 0.3921 |
| LGTHYQITK                                | 1061.2             | 2            | 2.4293 | 0.279  |
| LGTITPDGADVYSYDEDDMVLDP SLAEHL SHFGIDMLK | 4182.6             | 3            | 5.0474 | 0.4402 |
| LGTLSPAFSTR                              | 1150.3             | 2            | 3.1429 | 0.2014 |
| LGTNVESVLQAIER                           | 1642.9             | 2            | 3.0344 | 0.1664 |
| LGTPQQIAIAR                              | 1168.4             | 2            | 2.5735 | 0.277  |
| LGTPVLQALGDGDFVK                         | 1630.9             | 2            | 4.8152 | 0.4527 |
| LGTQEYLQQLESHMK                          | 1806.0             | 2            | 3.0015 | 0.208  |
| LGTQH PESNSAGNDVFAK                      | 1873.0             | 2            | 4.4081 | 0.4663 |
| LG VAGQWR                                | 887.0              | 2            | 2.8722 | 0.206  |
| LGVFRAESEEGPDVLR                         | 1775.0             | 2            | 3.9934 | 0.3091 |
| LGVI EDHSNR                              | 1140.2             | 2            | 3.4289 | 0.2988 |
| LGVLHPDVITK                              | 1192.4             | 2            | 3.1368 | 0.3064 |
| LGVLHVGQK                                | 951.1              | 2            | 2.9843 | 0.233  |
| LGVLHVGQKLEEQDEF EKIFK                   | 2487.8             | 3            | 5.4557 | 0.4073 |
| LG VNNISGIEEVNMFTNQGTVIHFNNPE            | 3089.4             | 3            | 6.3016 | 0.16   |
| LG VQDLFNSSK                             | 1208.3             | 2            | 3.4739 | 0.1834 |
| LG VQDLFNSSKADLSGMSGAR                   | 2154.4             | 3            | 3.9387 | 0.3181 |
| LG VQVREELLRAQEAPGQAEP PAAA EVQGAGNENEPR | 3883.2             | 3            | 3.3396 | 0.2209 |
| LG VQVVITDPEKLDQIR                       | 1924.2             | 2            | 4.7299 | 0.3729 |
| LG V RPSQGGEAPR                          | 1324.5             | 2            | 2.8733 | 0.2136 |
| LGVTANDVK                                | 917.0              | 2            | 2.9627 | 0.2962 |
| LGVTANDVKNVIIWGNHSSTQYPDVNHAK            | 3179.5             | 3            | 5.9912 | 0.3902 |
| LG WDPKPGEGHLDALLR                       | 1875.1             | 3            | 3.4169 | 0.2581 |
| LG WVRPDLGELSK                           | 1470.7             | 2            | 3.3983 | 0.1815 |
| LG YAGNTEPQFIIPSCIAIK                    | 2136.5             | 2            | 3.412  | 0.2586 |
| LG YAGNTEPQFIIPSCIAIRESAK                | 2580.0             | 3            | 3.6827 | 0.188  |

| Peptide Sequence                   | Peptide mass (m/z) | Charge State | Xcorr  | DelCn2 |
|------------------------------------|--------------------|--------------|--------|--------|
| LGYAVYETPTAHNGAK                   | 1692.9             | 2            | 4.2129 | 0.3748 |
| LGYFLALTGFR                        | 1258.5             | 2            | 3.0946 | 0.1145 |
| LGYFSVDPDSSHQ GK                   | 1550.7             | 2            | 2.4489 | 0.2144 |
| LHAATSK                            | 727.8              | 1            | 2.3443 | 0.1734 |
| LHAEAIKR                           | 938.1              | 2            | 2.4879 | 0.2125 |
| LHAEAIKRDPNLFPF EK                 | 2026.3             | 2            | 3.6294 | 0.2455 |
| LHAEFAAERDWEQFHQPR                 | 2268.4             | 3            | 3.2279 | 0.2671 |
| LHAGPEPQALPAFSDLEALSLSTLYSLQK      | 3098.5             | 3            | 4.0889 | 0.2646 |
| LHAIKEQLIQEGLLDR                   | 1877.2             | 2            | 4.0373 | 0.3125 |
| LHALVVG PGLGR                      | 1189.4             | 2            | 3.2505 | 0.2188 |
| LHALVVG PGLGRDDALLR                | 1873.2             | 2            | 3.4843 | 0.3501 |
| LHAVLKPFLLR                        | 1307.7             | 2            | 2.9165 | 0.1538 |
| LHAVNAEECNVLQGR                    | 1653.8             | 2            | 3.5979 | 0.2725 |
| LHAVVETLVNHR                       | 1388.6             | 2            | 3.21   | 0.3368 |
| LHAYDQHLMILGDVEETVTTIEIDEETYEEIYK  | 4056.4             | 3            | 7.0439 | 0.4809 |
| LHDALDAK                           | 883.0              | 1            | 2.7694 | 0.236  |
| LHDALDAKSKEFAQIIK                  | 1928.2             | 3            | 3.6941 | 0.3477 |
| LHDETLTYLNQGQSYEIR                 | 2181.3             | 3            | 5.1545 | 0.3159 |
| LHDNLIISDLENTVK                    | 1724.9             | 2            | 2.7959 | 0.2381 |
| LHDPEGMGIIPR                       | 1335.6             | 2            | 2.5771 | 0.1702 |
| LHDPQLMGIIPR                       | 1390.7             | 2            | 2.4004 | 0.1638 |
| LHDSISEEGFH YLVFDLVTGGELFEDIVAR    | 3409.7             | 3            | 5.094  | 0.4681 |
| LHDSLAIER                          | 1054.2             | 1            | 3.1142 | 0.3002 |
| LHDSLAIERK                         | 1182.4             | 2            | 3.32   | 0.1841 |
| LHDSSGSQVGTGFK                     | 1420.5             | 2            | 3.7206 | 0.3784 |
| LHDVEHVLIDVGTGYYVEK                | 2187.4             | 2            | 5.9305 | 0.5616 |
| LHDVLHSDKK                         | 1192.3             | 2            | 3.3059 | 0.2961 |
| LHDVNSDGFLDEQELEALFTK              | 2421.6             | 2            | 4.8905 | 0.4662 |
| LHDVNSDGFLDEQELEALFTKELEK          | 2921.2             | 3            | 5.4028 | 0.4961 |
| LHEADATLKR                         | 1154.3             | 2            | 2.9218 | 0.1994 |
| LHEANNELQK                         | 1196.3             | 2            | 2.4753 | 0.1036 |
| LHEEEIQELQAQIQEQHVQIDVDVSKPDLTAALR | 3925.3             | 3            | 7.8874 | 0.5775 |
| LHEEEPPQNMK PQSGNDKPLSK            | 2504.8             | 3            | 3.2877 | 0.2117 |
| LHEEINMKEQK                        | 1399.6             | 2            | 2.8997 | 0.1758 |
| LHEENFEITTLR                       | 1502.7             | 2            | 2.6451 | 0.3062 |
| LHEKVNIPLIAK                       | 1488.8             | 2            | 4.3181 | 0.392  |

| Peptide Sequence                       | Peptide mass (m/z) | Charge State | Xcorr  | DelCn2 |
|----------------------------------------|--------------------|--------------|--------|--------|
| LHELNQKWEALK                           | 1509.7             | 2            | 2.9921 | 0.1818 |
| LHELTSLLEEKDSLKR                       | 2025.3             | 3            | 4.2503 | 0.2953 |
| LHEVGRTEPELLVAHAYTR                    | 2192.5             | 3            | 4.6916 | 0.3804 |
| LHEWTKPENLDFIEVNVSLPR                  | 2537.9             | 3            | 4.5845 | 0.3402 |
| LHFEKDADSSER                           | 1434.5             | 2            | 3.2628 | 0.428  |
| LHFFMPGFAPLTAR                         | 1605.9             | 2            | 4.0512 | 0.4718 |
| LHFFMPGFAPLTSR                         | 1621.9             | 3            | 4.3162 | 0.3791 |
| LHFLHSDLALR                            | 1322.5             | 2            | 3.1626 | 0.3166 |
| LHFTIKDPANR                            | 1312.5             | 2            | 3.2205 | 0.3284 |
| LHGELR                                 | 724.8              | 1            | 1.6777 | 0.1163 |
| LHGGIDILVSNAAVNPFFGSIMDVTEEVWDKTLDINVK | 4159.7             | 3            | 4.1801 | 0.3207 |
| LHGGIDILVSNAAVNPFFGSLMDVTEEVWDKTLDINVK | 4159.7             | 3            | 4.583  | 0.2139 |
| LHGGSAPLPQDR                           | 1248.4             | 2            | 2.7267 | 0.2335 |
| LHGGTPANFLDVGGGATVHQVTEAFK             | 2624.9             | 3            | 5.0694 | 0.4979 |
| LGHVSAHPDILSLENR                       | 1896.1             | 2            | 3.222  | 0.2694 |
| LHGLNINYNCEICGNYTYR                    | 2261.5             | 2            | 3.2723 | 0.2336 |
| LHGQHLVQQLVLR                          | 1541.8             | 2            | 2.9147 | 0.2315 |
| LHGSPGHAFTLVGR                         | 1449.6             | 2            | 3.1784 | 0.5107 |
| LHGVNINVEASK                           | 1281.4             | 2            | 3.0015 | 0.2578 |
| LHGVRDYAAYNVLDPELR                     | 2217.4             | 3            | 4.4402 | 0.1795 |
| LHHEFLQQSLR                            | 1408.6             | 2            | 2.6069 | 0.2618 |
| LHHELENVEEKR                           | 1533.7             | 2            | 3.3929 | 0.3462 |
| LHHILQQDAPFGPEDYDQLAPTR                | 2662.9             | 3            | 4.7921 | 0.3331 |
| LHHQNQQQIQQQQQQLQR                     | 2312.5             | 2            | 5.761  | 0.3248 |
| LHHVSSLAWLDEHTLVTTSHDASVK              | 2785.1             | 3            | 5.3382 | 0.4363 |
| LHIEVGTPTGNQPFPK                       | 1946.2             | 2            | 4.8332 | 0.3821 |
| LHIEVGTPTGNQPFPKK                      | 2074.4             | 2            | 3.5253 | 0.2633 |
| LHIQNPSFSQINQLVSTIMSASTTTLR            | 2989.4             | 3            | 3.3508 | 0.1685 |
| LHISPSNMTNQNTNEYLEK                    | 2234.4             | 3            | 4.0201 | 0.1112 |
| LHISQLQHENSILK                         | 1660.9             | 2            | 4.4958 | 0.3949 |
| LHIVQVVCKK                             | 1167.5             | 2            | 2.8072 | 0.1793 |
| LHKNDIAINELMK                          | 1539.8             | 2            | 3.6308 | 0.1854 |
| LHLETDSLALVALGALDTALYAAGSK             | 2615.0             | 3            | 3.4603 | 0.1674 |
| LHLFPDEYIPEDILK                        | 1843.1             | 2            | 3.2485 | 0.3196 |
| LHLFPDEYIPEDILKNLVEELPQPR              | 3019.4             | 3            | 5.7631 | 0.4525 |
| LHLGFIEIR                              | 1098.3             | 2            | 3.3015 | 0.1772 |

| Peptide Sequence                 | Peptide mass (m/z) | Charge State | Xcorr  | DelCn2 |
|----------------------------------|--------------------|--------------|--------|--------|
| LHLGHTFSLSK                      | 1240.4             | 2            | 3.2768 | 0.2677 |
| LHLGIPEAVFVEDVDSFMK              | 2147.5             | 2            | 4.8668 | 0.4078 |
| LHLGIPEAVFVEDVDSFMKQPGNETADTVLK  | 3401.8             | 3            | 4.2149 | 0.2995 |
| LHLGIPEAVFVEDVDSFMKQPGNETADTVLKK | 3530.0             | 3            | 3.6223 | 0.2392 |
| LHLGSTPHNLTDANIELAR              | 2210.4             | 3            | 6.0022 | 0.5674 |
| LHLGTTQNSLTEADFR                 | 1804.0             | 2            | 3.473  | 0.1292 |
| LHLIAQELPFDR                     | 1452.7             | 2            | 2.793  | 0.1185 |
| LHLIAQELPFDRFSEVK                | 2043.4             | 2            | 4.3716 | 0.3351 |
| LHLNQNGDHNTK                     | 1391.5             | 2            | 3.6304 | 0.2761 |
| LHLPADDVVSIIIEVEEK               | 2036.3             | 3            | 5.5092 | 0.3752 |
| LHLPADDVVSIIIEVEEKR              | 2192.5             | 2            | 4.5685 | 0.4631 |
| LHLPADDVVSIIIEVEEKRK             | 2320.6             | 2            | 3.6665 | 0.256  |
| LHLQQQTMQDPFGEKR                 | 1886.1             | 2            | 4.5965 | 0.4438 |
| LHLQSTDYGNFLANEASPLTVSVIDDR      | 2977.2             | 3            | 3.9476 | 0.3334 |
| LHLSGIDANPNALFPPVEFPAPR          | 2473.8             | 2            | 5.7497 | 0.5006 |
| LHLVALVGTQGR                     | 1264.5             | 2            | 3.3096 | 0.263  |
| LHLVESLLSR                       | 1167.4             | 2            | 2.7182 | 0.2703 |
| LHLYNSLTR                        | 1117.3             | 2            | 2.4368 | 0.2079 |
| LHNAANANQK                       | 1081.2             | 2            | 2.7431 | 0.179  |
| LHNAIEGGTQLSR                    | 1396.5             | 2            | 4.1869 | 0.375  |
| LHNALALIR                        | 1021.2             | 2            | 2.6493 | 0.2671 |
| LHNFHQLSAPQPCFTFSHPNR            | 2479.8             | 3            | 3.3972 | 0.1057 |
| LHNMIVDLDNVVK                    | 1510.8             | 2            | 4.4444 | 0.4243 |
| LHNMIVDLDNVVKK                   | 1639.0             | 2            | 4.6196 | 0.4479 |
| LHNQQALSSSIEEGLR                 | 1782.9             | 2            | 5.0531 | 0.3422 |
| LHNSLIGTK                        | 983.1              | 2            | 2.5213 | 0.2275 |
| LHNVFNDFLMLSNTQFIENR             | 2453.8             | 3            | 4.4539 | 0.3223 |
| LHPDKNPNNPNAHGDFLK               | 2029.2             | 2            | 4.0023 | 0.3881 |
| LHPEDFPEEDKKTGEIFEK              | 2452.7             | 2            | 4.0741 | 0.435  |
| LHPESKDDKHGSYEDAVHSGALND         | 2622.7             | 3            | 3.5716 | 0.2365 |
| LHPVILASIVDSYER                  | 1713.0             | 2            | 5.0432 | 0.5168 |
| LHQAKEQYEALQEETR                 | 1974.1             | 3            | 3.6021 | 0.1926 |
| LHQDLAVQER                       | 1209.3             | 2            | 2.6997 | 0.1102 |
| LHQLAMQQSHFPMTHGNTGFSGIESSSPEVK  | 3384.7             | 3            | 7.288  | 0.477  |
| LHQLDAEKER                       | 1239.4             | 2            | 2.9742 | 0.164  |
| LHQVYFDAPTCR                     | 1450.6             | 2            | 2.7945 | 0.2147 |



| Peptide Sequence              | Peptide mass (m/z) | Charge State | Xcorr  | DelCn2 |
|-------------------------------|--------------------|--------------|--------|--------|
| LHRPPVIVLQR                   | 1328.6             | 3            | 3.3178 | 0.2821 |
| LHRTELATQEK                   | 1326.5             | 2            | 2.4569 | 0.1352 |
| LHSEFHLSTFK                   | 1346.5             | 2            | 2.6616 | 0.2843 |
| LHSTSQNINLGPSGNPHAKPTDFDFLK   | 2937.2             | 3            | 3.4974 | 0.1327 |
| LHTAVVSTPPR                   | 1178.4             | 2            | 3.0348 | 0.2788 |
| LHTDDELNWLDHGR                | 1721.8             | 3            | 3.9014 | 0.2718 |
| LHTDGDKAFVDFLSDEIKEER         | 2465.7             | 3            | 6.3997 | 0.5997 |
| LHTDGDKAFVDFLSDEIKEERK        | 2593.8             | 3            | 5.2253 | 0.4683 |
| LHTGSEGGQDSR                  | 1244.3             | 2            | 3.2154 | 0.4221 |
| LHTLEEEKEELAQYQK              | 1989.2             | 2            | 5.1425 | 0.2587 |
| LHTLSVEHQR                    | 1220.4             | 2            | 2.5529 | 0.3069 |
| LHTNFHIPK                     | 1107.3             | 2            | 2.7786 | 0.197  |
| LHTVGGPGSARPR                 | 1305.5             | 2            | 2.7703 | 0.3583 |
| LHVDVPKDLTKPVVTISDEPDILYKR    | 2992.5             | 3            | 5.8969 | 0.4691 |
| LHVENEDKK                     | 1112.2             | 2            | 2.5796 | 0.175  |
| LHVSNIPIFR                    | 1083.3             | 2            | 2.5563 | 0.1562 |
| LHYCVSCAIHNKVVVR              | 1743.1             | 2            | 3.2508 | 0.2955 |
| LHYCVSCAIHSK                  | 1361.6             | 2            | 3.3    | 0.1741 |
| LIADLGSTSITNLGFR              | 1678.9             | 2            | 5.2978 | 0.4601 |
| LIAEGNKEELRK                  | 1400.6             | 2            | 3.6638 | 0.1961 |
| LIAFTSEHSHFSLKK               | 1746.0             | 2            | 3.9862 | 0.2688 |
| LIAHAGSLLNLAK                 | 1321.6             | 2            | 2.7407 | 0.177  |
| LIAHAGSLTNLAK                 | 1309.5             | 2            | 3.0003 | 0.323  |
| LIAHAGSLTNLAKYPASTVQILGAEK    | 2668.1             | 3            | 5.8026 | 0.4326 |
| LIAINANDPEASK                 | 1356.5             | 2            | 3.8568 | 0.328  |
| LIAINANDPEASKFHDIDDVKK        | 2454.7             | 3            | 4.6537 | 0.4723 |
| LIALLEVLVSQK                  | 1227.5             | 2            | 3.9197 | 0.3627 |
| LIALLEVLVSQKK                 | 1355.7             | 2            | 3.827  | 0.2531 |
| LIALLEVLVSQKR                 | 1383.7             | 2            | 3.8652 | 0.346  |
| LIALSIDSVEDHLAWSK             | 1898.1             | 2            | 4.6544 | 0.4708 |
| LIAPVAEEEEATVPNNK             | 1695.9             | 2            | 3.8986 | 0.3738 |
| LIAVDISPVESTGVSHFATYVAAMR     | 2636.0             | 3            | 3.3153 | 0.2812 |
| LIAVIGDEDTVTFLLGGIGELNK       | 2445.8             | 2            | 5.0235 | 0.4095 |
| LIAYQEPADDSSFSLSQEVLR         | 2369.6             | 2            | 4.7149 | 0.3825 |
| LICCDILDVLDKHLIPAANTGESK      | 2583.0             | 3            | 5.4937 | 0.3631 |
| LICCDILDVLDKHLIPAANTGESKVFYYK | 3283.8             | 3            | 5.1765 | 0.2046 |

| Peptide Sequence                           | Peptide mass (m/z) | Charge State | Xcorr  | DelCn2 |
|--------------------------------------------|--------------------|--------------|--------|--------|
| LIDDEVRLINDAYKR                            | 1947.2             | 3            | 4.4501 | 0.2788 |
| LIDDMVAQAMK                                | 1235.5             | 2            | 3.665  | 0.3776 |
| LIDDMVAQVLK                                | 1245.5             | 2            | 4.2346 | 0.2542 |
| LIDDYDSTK                                  | 1070.1             | 1            | 2.1144 | 0.2701 |
| LIDDYDSTKSGLDHK                            | 1707.8             | 2            | 3.8526 | 0.3321 |
| LIDDYDSTKSGLDHKFQDDPDGLHQLDGTPLTAEDIVHK    | 4351.6             | 3            | 4.7158 | 0.3479 |
| LIDDYGGEDDELGGPGGGAGGPGGGLYGELPEGTSITVDSKR | 4108.3             | 3            | 7.0831 | 0.5262 |
| LIDDYGVVEEPAELPEGTSLTVDNK                  | 2734.9             | 3            | 4.5669 | 0.2158 |
| LIDDYGVVEEPAELPEGTSLTVDNKR                 | 2891.1             | 3            | 5.5767 | 0.3932 |
| LIDIFYPGDQQSVTFGTK                         | 2030.3             | 2            | 4.1466 | 0.4556 |
| LIDLHSPSEIVK                               | 1351.6             | 2            | 3.4898 | 0.3217 |
| LIDLHTNVATAVLEHIK                          | 1888.2             | 3            | 5.7632 | 0.5201 |
| LIDLHTNVATAVLEHIKAR                        | 2115.5             | 3            | 4.1176 | 0.3885 |
| LIDREIISHDTR                               | 1468.6             | 2            | 2.9362 | 0.2057 |
| LIDREIISHDTRR                              | 1624.8             | 3            | 3.7116 | 0.2921 |
| LIDVNHYAKDEVAAR                            | 1714.9             | 2            | 4.1052 | 0.3897 |
| LIDVPDPVPALDLGQQQLK                        | 2173.5             | 2            | 3.0961 | 0.3457 |
| LIDWGLAEFYHPAQEYNVR                        | 2322.6             | 2            | 2.4657 | 0.1657 |
| LIDYGKLGDTNER                              | 1494.6             | 2            | 3.767  | 0.384  |
| LIEADISKR                                  | 1045.2             | 2            | 2.6519 | 0.1768 |
| LIEDFLAR                                   | 977.1              | 2            | 3.1506 | 0.1338 |
| LIEDKPR                                    | 871.0              | 1            | 2.1207 | 0.1217 |
| LIEEKGAVDALAAALAHISGASSFEPR                | 2725.1             | 3            | 5.1354 | 0.4062 |
| LIEEKGAVEALAAALAHISGATSVDQR                | 2722.0             | 3            | 5.1256 | 0.3782 |
| LIEFSPLR                                   | 975.2              | 2            | 2.6453 | 0.1945 |
| LIEGVHPGSLVEKLPDSPALAKK                    | 2399.8             | 2            | 2.8143 | 0.1114 |
| LIEKLDIKLDSEDKDKEGKPLLK                    | 2669.1             | 3            | 4.5338 | 0.2219 |
| LIEKNKMSDGKKEELQK                          | 2019.4             | 3            | 3.7479 | 0.1239 |
| LIEKQISQMADDTVAELDRHLAVK                   | 2725.1             | 3            | 3.8101 | 0.2875 |
| LIEKYIAENGTDPINNQLSEEQLIDIK                | 3199.6             | 3            | 5.327  | 0.3698 |
| LIELHSPDSR                                 | 1167.3             | 2            | 2.4653 | 0.1963 |
| LIELKEHPAHER                               | 1472.7             | 2            | 3.5367 | 0.2517 |
| LIELYKEAGISKDR                             | 1635.9             | 2            | 3.869  | 0.4087 |
| LIENVDPKAVQLYQQTANVFENEER                  | 3078.3             | 3            | 4.4887 | 0.1858 |
| LIENVDPKAVQLYQQTANVFENEERLR                | 3347.7             | 3            | 4.7805 | 0.2964 |
| LIERDPYEHPER                               | 1554.7             | 3            | 3.3106 | 0.2186 |

| Peptide Sequence                 | Peptide mass (m/z) | Charge State | Xcorr  | DelCn2 |
|----------------------------------|--------------------|--------------|--------|--------|
| LIESAEELIR                       | 1173.3             | 2            | 2.9284 | 0.1679 |
| LIEVDDER                         | 989.1              | 2            | 3.0558 | 0.2598 |
| LIEVDDERK                        | 1117.2             | 2            | 2.9706 | 0.2145 |
| LIEVDDERKLR                      | 1386.6             | 2            | 2.8319 | 0.2015 |
| LIEYYQQLAQK                      | 1397.6             | 2            | 3.1747 | 0.1547 |
| LIFKPDLTLEEVQAENPKVSR            | 2427.8             | 3            | 4.2872 | 0.2713 |
| LIFPYVELDLHSYDLGIENR             | 2407.7             | 2            | 4.7906 | 0.4161 |
| LIFPYVELDLHSYDLGIENRDATNDQVTK    | 3380.7             | 3            | 4.8417 | 0.3182 |
| LIGDAAKNQLTSNPENTVFDK            | 2347.6             | 2            | 5.6569 | 0.3583 |
| LIGDAAKNQLTSNPENTVFDKR           | 2503.8             | 3            | 4.7877 | 0.2691 |
| LIGDAAKNQVALNPQNTVFDKR           | 2484.8             | 3            | 4.2224 | 0.2233 |
| LIGDAAKNQVAMNPTNTVFDK            | 2319.6             | 2            | 5.8961 | 0.4492 |
| LIGDAAKNQVAMNPTNTVFDKR           | 2475.8             | 3            | 4.202  | 0.3037 |
| LIGEYGLR                         | 921.1              | 2            | 2.8936 | 0.1446 |
| LIGLSATLPNYEDVATFLR              | 2094.4             | 2            | 3.0951 | 0.221  |
| LIGNMALLPIR                      | 1211.5             | 2            | 2.9878 | 0.2201 |
| LIGQIVSSITASLR                   | 1458.7             | 2            | 4.8713 | 0.4383 |
| LIHEDGIIRPYDRQESEGSDLLENHIK      | 3178.5             | 3            | 3.9778 | 0.2701 |
| LIHEQDLEWLQQADVVAEVTQPSLGVGYELGR | 3694.1             | 3            | 4.2966 | 0.2872 |
| LIHPDEDISLEER                    | 1566.7             | 2            | 3.0985 | 0.3495 |
| LIHPDEDISLEERR                   | 1722.9             | 2            | 3.6813 | 0.2476 |
| LIHPSKLNEVEQLLYYLQNR             | 2471.8             | 3            | 4.1606 | 0.2437 |
| LIHQTNLILQTFK                    | 1569.9             | 2            | 4.2619 | 0.3696 |
| LIKDDFLQQNGYTPYDR                | 2087.3             | 2            | 5.1161 | 0.4314 |
| LIKDGLIIR                        | 1041.3             | 2            | 2.7423 | 0.2388 |
| LIKEFSIYMTK                      | 1373.7             | 2            | 3.5146 | 0.311  |
| LIKEGDIVKR                       | 1171.4             | 2            | 2.9989 | 0.2603 |
| LIKEPAPDSGLLGLFQGQNSLLH          | 2448.8             | 3            | 7.2303 | 0.4749 |
| LIKGVIVDKDFSHQPMPK               | 2053.5             | 3            | 3.664  | 0.2068 |
| LIKLEHAEAK                       | 1152.4             | 2            | 2.6946 | 0.1492 |
| LIKNNASTDYDLSDK                  | 1697.8             | 2            | 4.3904 | 0.3943 |
| LILAANRDEFYSRPSK                 | 1881.1             | 3            | 3.2669 | 0.2813 |
| LILDWVPYINGK                     | 1431.7             | 2            | 3.4987 | 0.2659 |
| LILENHHATIPQK                    | 1514.8             | 2            | 2.8592 | 0.2293 |
| LILEQMOKDPQALSEHLKNPVIAQK        | 2873.4             | 3            | 5.8652 | 0.5269 |
| LILEQMOKDPQALSEHLKNPVIAQKIQK     | 3242.8             | 3            | 4.0374 | 0.2611 |

| Peptide Sequence                 | Peptide mass (m/z) | Charge State | Xcorr  | DelCn2 |
|----------------------------------|--------------------|--------------|--------|--------|
| LILEVHQFSR                       | 1242.5             | 2            | 2.8727 | 0.2093 |
| LILGLMPPPAHYDAK                  | 1671.1             | 2            | 4.3575 | 0.3951 |
| LILHGTSSQPEHMK                   | 1578.8             | 2            | 3.8254 | 0.3846 |
| LILHGTSSQPEHMKQPR                | 1960.3             | 2            | 5.0809 | 0.3968 |
| LILKKEDELGDR                     | 1429.6             | 2            | 3.0499 | 0.2107 |
| LILPHVDIQLK                      | 1289.6             | 2            | 3.1585 | 0.2831 |
| LILPVGPAAGGNQMLEQYDK             | 2044.4             | 2            | 4.3319 | 0.4127 |
| LILPVGPAAGGNQMLEQYDKLQDGSIK      | 2786.2             | 2            | 3.5619 | 0.3171 |
| LIMGIGHR                         | 897.1              | 2            | 2.5509 | 0.2801 |
| LIMQYLKENS LHR                   | 1646.0             | 2            | 2.9771 | 0.3661 |
| LINQPLPDLK                       | 1151.4             | 2            | 3.3466 | 0.1856 |
| LINQVLELQHTLEDLSAR               | 2093.4             | 2            | 4.9324 | 0.4111 |
| LINQVLELQHTLEDLSARVDAVKEENLK     | 3219.6             | 3            | 4.728  | 0.2959 |
| LINSLYPPGQPEPIPK                 | 1666.9             | 2            | 3.4327 | 0.1726 |
| LIPDSIGKDIEK                     | 1328.5             | 2            | 2.8052 | 0.2676 |
| LIPEMDQIFTEVEMTTLEK              | 2268.6             | 3            | 5.3523 | 0.5143 |
| LIQDQQEQIQHLK                    | 1621.8             | 2            | 2.769  | 0.1245 |
| LIQEAAGRSNLKR                    | 1456.7             | 2            | 3.1511 | 0.1742 |
| LIQEIVDKSGVVR                    | 1456.7             | 2            | 3.8861 | 0.274  |
| LIQESDQHLKDVEK                   | 1682.9             | 2            | 4.3275 | 0.2504 |
| LIQHANVQAHS SLIR                 | 1687.9             | 2            | 3.7885 | 0.4309 |
| LIQHAQIPPEDSEIITNMAHLGVPIVTDSTLR | 3511.0             | 3            | 4.7843 | 0.3966 |
| LIQLMEEIMAEKENK                  | 1820.2             | 2            | 4.0505 | 0.2471 |
| LIQNNHYAMEDVATR                  | 1776.0             | 3            | 3.6655 | 0.2513 |
| LIQQPQNASMFVNRPALGILPPENFVEK     | 3152.7             | 3            | 4.8736 | 0.2906 |
| LIQQQLEKELN TLR                  | 1727.0             | 2            | 4.7622 | 0.2558 |
| LIQSEVALNDLHLTK                  | 1695.0             | 2            | 4.2297 | 0.3655 |
| LIQSHPESAEDLQEK                  | 1724.9             | 2            | 5.136  | 0.3387 |
| LIQVPKGPVEGYEENE EFLR            | 2347.6             | 3            | 4.5035 | 0.3052 |
| LIRDEGLAVMDK                     | 1360.6             | 2            | 2.9904 | 0.2007 |
| LIRDEGLAVMDKAK                   | 1559.9             | 2            | 2.45   | 0.1543 |
| LIRGPAETEATTD                    | 1374.5             | 2            | 2.9685 | 0.2979 |
| LIRGPGENGDDS                     | 1230.3             | 2            | 2.6658 | 0.239  |
| LISDINKAWERLEK                   | 1716.0             | 2            | 3.4936 | 0.1768 |
| LISEILSESVVPDVR                  | 1656.9             | 2            | 2.7225 | 0.2113 |
| LISELSLLNHKL PAR                 | 1705.0             | 3            | 3.3053 | 0.3516 |

| Peptide Sequence                          | Peptide mass (m/z) | Charge State | Xcorr  | DelCn2 |
|-------------------------------------------|--------------------|--------------|--------|--------|
| LISGDIPGPLQGSGQDMVSILQLVQNLMHGDEDEEPPQSPR | 4302.8             | 3            | 4.8799 | 0.4356 |
| LISKKEEDVSYLSGQLSEKEAALK                  | 2768.1             | 3            | 5.9085 | 0.4507 |
| LISLTDENALSGNEELTVK                       | 2047.2             | 2            | 5.9426 | 0.5349 |
| LISQIVSSITASLR                            | 1488.8             | 2            | 4.6464 | 0.5005 |
| LISSDGHEFIVK                              | 1345.5             | 2            | 3.3792 | 0.309  |
| LISSDGHEFIVKR                             | 1501.7             | 2            | 3.8972 | 0.3653 |
| LISWYDNEFGYSNR                            | 1764.9             | 2            | 4.8601 | 0.5339 |
| LISWYDNEFGYSNRVVDLMAHMASKE                | 3077.4             | 3            | 3.8499 | 0.1794 |
| LISYAQLTGR                                | 1122.3             | 2            | 3.2683 | 0.2729 |
| LITAADTTAEQR                              | 1290.4             | 2            | 3.0678 | 0.3121 |
| LITDLQDQNQK                               | 1316.4             | 2            | 2.5575 | 0.1131 |
| LITEDVQGK                                 | 1003.1             | 2            | 2.5295 | 0.137  |
| LITINQQWKPIEELQNVQR                       | 2351.7             | 3            | 5.8643 | 0.432  |
| LITKPSEGTTLRVEDLVK                        | 2000.3             | 2            | 2.9138 | 0.1078 |
| LITLEEEMTK                                | 1207.4             | 2            | 3.0923 | 0.2183 |
| LITLEQGKTLADAEGDVFR                       | 2077.3             | 3            | 3.9796 | 0.1494 |
| LITPAVVSR                                 | 1085.3             | 2            | 2.8399 | 0.3619 |
| LITQTFSHHNQLAQK                           | 1767.0             | 2            | 4.6301 | 0.307  |
| LITVNTPDVLVLFVGEALVGNEAVDQLVK             | 2968.4             | 3            | 3.7189 | 0.1152 |
| LIVALMKPSR                                | 1128.5             | 2            | 2.9628 | 0.272  |
| LIVDEAINEDNSVVSLSQPK                      | 2171.4             | 2            | 6.2456 | 0.5022 |
| LIVDVIRFQPGETLTEILETPATSEQEAHQQR          | 3652.0             | 3            | 5.6982 | 0.3699 |
| LIVENLSSR                                 | 1031.2             | 2            | 2.9096 | 0.2545 |
| LIVGLMRPPAYCDAK                           | 1648.0             | 2            | 3.4486 | 0.4432 |
| LIVHNGYCDGR                               | 1247.4             | 2            | 2.5726 | 0.2567 |
| LIVQPNTRELGSDVQLLEYEASAAGLIR              | 3057.4             | 3            | 4.2271 | 0.3273 |
| LKAADIDQEVK                               | 1230.4             | 2            | 2.8874 | 0.1816 |
| LKAADIDQEVKER                             | 1515.7             | 2            | 2.6212 | 0.2295 |
| LKAEAEELLQQQK                             | 1399.6             | 2            | 3.5855 | 0.1766 |
| LKAEAEELLQQQKELAQEQAR                     | 2325.6             | 2            | 6.607  | 0.4211 |
| LKAEAEELLQQQKELAQEQARR                    | 2481.8             | 3            | 3.4812 | 0.2501 |
| LKAEATEAAR                                | 1060.2             | 2            | 2.8837 | 0.253  |
| LKAEGSEIR                                 | 1003.1             | 1            | 2.4479 | 0.257  |
| LKAELGIPLEEVPPPEEINYLTR                   | 2524.9             | 3            | 3.5499 | 0.2451 |
| LKAFLASPEYVNLPIGNGK                       | 2146.5             | 3            | 4.533  | 0.2438 |
| LKAFLASPEYVNLPIGNGKQ                      | 2274.6             | 3            | 4.5094 | 0.2324 |

| Peptide Sequence                    | Peptide mass (m/z) | Charge State | Xcorr  | DelCn2 |
|-------------------------------------|--------------------|--------------|--------|--------|
| LKAHLEKLEVDLNK                      | 1650.9             | 2            | 4.4276 | 0.3558 |
| LKAIEPNDYTGK                        | 1349.5             | 2            | 2.6879 | 0.1833 |
| LKAIEPNDYTGKVSEEEIEDIIK             | 2505.8             | 3            | 3.8378 | 0.2907 |
| LKAIEPNDYTGKVSEEEIEDIIKKGETQTL      | 3263.6             | 3            | 3.9977 | 0.3245 |
| LKAMDQEITVNPQFVQK                   | 1990.3             | 2            | 4.5647 | 0.4127 |
| LKAQALAIETEAEELQR                   | 1785.0             | 2            | 5.6174 | 0.5159 |
| LKASLDRPFTNLESAFYISIVGLSSLGAQVPDAK  | 3497.0             | 3            | 4.4518 | 0.4416 |
| LKASLDRPFTNLESAFYISIVGLSSLGAQVPDAKK | 3625.1             | 3            | 5.227  | 0.3547 |
| LKATDQEK                            | 933.0              | 2            | 2.8314 | 0.1164 |
| LKATVTPSPVK                         | 1141.4             | 2            | 3.2795 | 0.2757 |
| LKATVTPSPVKGK                       | 1326.6             | 2            | 3.9872 | 0.207  |
| LKAVQAQGGESQQEAQR                   | 1829.0             | 3            | 4.026  | 0.1498 |
| LKAYEDQTKPVLEYYQK                   | 2117.4             | 2            | 5.2703 | 0.4431 |
| LKAYEDQTKPVLEYYQKK                  | 2245.6             | 3            | 3.6921 | 0.2748 |
| LKCASLQK                            | 891.1              | 2            | 2.6576 | 0.1519 |
| LKDAVAHCHEAER                       | 1479.6             | 2            | 3.5468 | 0.233  |
| LKDDEVAQLKK                         | 1287.5             | 2            | 4.17   | 0.2609 |
| LKDEDLLPSKYFEVDFPMIVTR              | 2657.1             | 3            | 5.5194 | 0.4997 |
| LKDELASTK                           | 1005.1             | 2            | 3.2656 | 0.1437 |
| LKDEVLKETVSQRPGATVPTDFATFPSSAFLR    | 3510.0             | 3            | 5.8997 | 0.4283 |
| LKDHMLIPVSMSELEK                    | 1871.3             | 2            | 4.8053 | 0.3315 |
| LKDIAGEFKEQLQALIPYVLNPSK            | 2716.2             | 3            | 3.9898 | 0.2308 |
| LKDISSLEFAENK                       | 1494.7             | 2            | 2.9042 | 0.1534 |
| LKDISTLEPLK                         | 1257.5             | 2            | 3.2876 | 0.1343 |
| LKDKEVAFWTNLFK                      | 1811.1             | 2            | 4.4323 | 0.4333 |
| LKDKNEPVQNLPIQK                     | 1765.0             | 3            | 3.2266 | 0.169  |
| LKDLEALLNSK                         | 1244.5             | 2            | 4.128  | 0.2586 |
| LKDLEALLNSKEAALSTALSEK              | 2345.7             | 3            | 5.9552 | 0.473  |
| LKDLEALLNSKEAALSTALSEKR             | 2501.9             | 3            | 6.8745 | 0.5318 |
| LKDLGHPVEEEDELESGDQEDEDSEDPGKDL DHI | 4080.1             | 3            | 4.2406 | 0.2041 |
| LKDLPFIVSHR                         | 1325.6             | 2            | 3.1297 | 0.225  |
| LKDNLGIHYK                          | 1201.4             | 2            | 2.6165 | 0.1564 |
| LKDPANFQYPAESVLAYKEGHLSPDIVAEQK     | 3459.8             | 3            | 4.5755 | 0.3702 |
| LKDPEKGPVPTFQPFQR                   | 1985.3             | 2            | 3.2792 | 0.2753 |
| LKDQEAKHDEL                         | 1326.4             | 2            | 3.0546 | 0.1427 |
| LKDSAVLDQSAK                        | 1275.4             | 2            | 3.3138 | 0.239  |

| Peptide Sequence             | Peptide mass (m/z) | Charge State | Xcorr  | DelCn2 |
|------------------------------|--------------------|--------------|--------|--------|
| LKDSEAE LQR                  | 1189.3             | 2            | 3.4789 | 0.2361 |
| LKDVLLQVDDER                 | 1443.6             | 2            | 3.5942 | 0.3631 |
| LKDVLLQVDDERR                | 1599.8             | 3            | 3.6813 | 0.3188 |
| LKDVLLQVDDERRNAEQYKDQADKASTR | 3306.6             | 3            | 3.9194 | 0.1866 |
| LKDVQSMDELKDVYNHFLLYYGR      | 2848.2             | 3            | 4.5608 | 0.3169 |
| LKDWQEGGYTINDKPNPR           | 2132.3             | 3            | 4.1834 | 0.3402 |
| LKDYAFIHFDER                 | 1554.7             | 2            | 4.0833 | 0.4359 |
| LKDYAFVHFEDR                 | 1540.7             | 2            | 4.4752 | 0.4801 |
| LKEADEMHTLLQLECEK            | 2031.3             | 2            | 5.183  | 0.4026 |
| LKEAEELLEPLMPAIR             | 1724.1             | 2            | 3.671  | 0.1708 |
| LKEAETRAEFAER                | 1550.7             | 2            | 2.9287 | 0.2048 |
| LKEAISTSKEQEA K              | 1562.7             | 2            | 4.0243 | 0.3488 |
| LKEALQPLINR                  | 1295.6             | 2            | 3.1812 | 0.2104 |
| LKECCEKPLLEK                 | 1433.8             | 2            | 3.2207 | 0.1456 |
| LKEDKAPQVDVDKAVAE LK         | 2097.4             | 3            | 5.0572 | 0.3924 |
| LKEEAAMK                     | 920.1              | 1            | 2.0261 | 0.1911 |
| LKEEAAMKAKTE                 | 1349.6             | 2            | 3.7889 | 0.3872 |
| LKEEEEDKK                    | 1148.2             | 2            | 3.4202 | 0.1246 |
| LKEEEEDKKR                   | 1304.4             | 2            | 3.3999 | 0.1122 |
| LKEEENTVGR                   | 1175.3             | 2            | 3.1368 | 0.2264 |
| LKEEIDLLNRDLDDIEDENEQLKQENK  | 3300.5             | 3            | 6.2758 | 0.3014 |
| LKEELAQKDIR                  | 1343.6             | 2            | 3.4131 | 0.2264 |
| LKEELEEAR DIAR               | 1572.7             | 2            | 3.3649 | 0.1279 |
| LKEELIDAIRQELSK              | 1786.1             | 2            | 4.391  | 0.3321 |
| LKEELSEVETK                  | 1305.5             | 2            | 3.3544 | 0.1999 |
| LKEEMEGVVKELAENNHILER        | 2481.8             | 3            | 5.0675 | 0.3365 |
| LKEESRDEESPYATSLYHS          | 2242.3             | 3            | 3.3804 | 0.2586 |
| LKEEYQSLIR                   | 1279.5             | 2            | 3.3315 | 0.2111 |
| LKEFLEDYDDDRDDPKYYR          | 2496.6             | 3            | 3.9059 | 0.1995 |
| LKEFMPPGLQELIPFVKPAPIEQEPSKK | 3192.8             | 3            | 5.0898 | 0.4263 |
| LKEGDTIIVPGVEGPIVTQIR        | 2235.6             | 3            | 4.5828 | 0.3788 |
| LKEGDTMMGQQVAK               | 1536.8             | 2            | 4.1578 | 0.3153 |
| LKEIEHNLSK                   | 1211.4             | 2            | 3.0897 | 0.1429 |
| LKEIVTNFLAGFEA               | 1552.8             | 2            | 4.1215 | 0.442  |
| LKEIYENMAPGENKR              | 1793.0             | 2            | 4.6046 | 0.3864 |
| LKEKEDALTRTELET LQK          | 2146.4             | 2            | 4.5481 | 0.2842 |

| Peptide Sequence                          | Peptide mass (m/z) | Charge State | Xcorr  | DelCn2 |
|-------------------------------------------|--------------------|--------------|--------|--------|
| LKEKEELETGKK                              | 1432.6             | 3            | 4.2408 | 0.1827 |
| LKEKLEDPDPGVQSAAVNVICELAR                 | 2696.1             | 3            | 4.0748 | 0.2082 |
| LKEKYEKDIAAYR                             | 1627.9             | 2            | 4.8143 | 0.3471 |
| LKEKYEKDVADYK                             | 1629.8             | 2            | 4.5621 | 0.3306 |
| LKELDEEHSQELK                             | 1598.7             | 2            | 4.5854 | 0.1692 |
| LKELESQVSGLEK                             | 1460.7             | 2            | 4.3524 | 0.3197 |
| LKELESQVSGLEKEAIELR                       | 2172.5             | 3            | 5.4626 | 0.4793 |
| LKELESQVSGLEKEAIELREAVEQQK                | 2985.3             | 3            | 7.6772 | 0.4698 |
| LKELESQVSGLEKEAIELREAVEQQKVK              | 3212.6             | 3            | 4.193  | 0.271  |
| LKELEVAEGGKAELER                          | 1772.0             | 2            | 4.15   | 0.3011 |
| LKELEVAEGGKAELERLQAEAQQLR                 | 2810.2             | 3            | 4.8176 | 0.1855 |
| LKELGATMDGFHR                             | 1475.7             | 3            | 3.4051 | 0.1613 |
| LKELIFEETAR                               | 1349.6             | 3            | 3.6366 | 0.2695 |
| LKELIGATAGK                               | 1101.3             | 2            | 3.0936 | 0.1866 |
| LKELVVPK                                  | 926.2              | 2            | 2.9796 | 0.174  |
| LKEMFPPIAQYGDVLVR                         | 1993.4             | 2            | 2.4628 | 0.1876 |
| LKENNIEQIYPVNAISFHNIHNTFATGGSDGFVNIWDPFNK | 4664.1             | 3            | 5.4291 | 0.4184 |
| LKENYAAEYANALEK                           | 1727.9             | 2            | 5.4341 | 0.3602 |
| LKEQQQAPITPQQGQALAK                       | 2007.3             | 3            | 4.1288 | 0.4088 |
| LKEQSIFGDHRDEEEETHMK                      | 2459.6             | 3            | 3.4476 | 0.1571 |
| LKEREEFLIPIYHQVAVQFADLHDTTPGR             | 3323.7             | 3            | 4.3064 | 0.3771 |
| LKERLDQPMTEIVSR                           | 1816.1             | 3            | 4.1494 | 0.3193 |
| LKESAEFQTQLEK                             | 1551.7             | 2            | 3.5163 | 0.2642 |
| LKESEEKEVLLK                              | 1445.7             | 2            | 3.1345 | 0.1117 |
| LKESNTTKGELQLKLDLQASDVSVK                 | 2875.2             | 3            | 4.525  | 0.2791 |
| LKESQTQDNITVR                             | 1532.7             | 2            | 4.2435 | 0.3224 |
| LKETAEKDDLEER                             | 1834.9             | 2            | 5.025  | 0.4305 |
| LKETAESVLK                                | 1118.3             | 2            | 2.728  | 0.1118 |
| LKETAESVLKPKVDCVSVPCFYTDAER               | 3227.7             | 3            | 4.809  | 0.1825 |
| LKETAESVLKPKVDCVSVPCFYTDAERR              | 3383.9             | 3            | 5.4107 | 0.3702 |
| LKETGYVVERPSTTK                           | 1708.9             | 2            | 4.5835 | 0.393  |
| LKEVFSMAGVVVR                             | 1435.8             | 2            | 2.5714 | 0.1403 |
| LKEVLEYNAIGGK                             | 1434.7             | 2            | 3.7607 | 0.2341 |
| LKEVLEYNAIGGKYNR                          | 1868.1             | 3            | 3.4767 | 0.2608 |
| LKEVVLQVEEER                              | 1471.7             | 2            | 3.4941 | 0.1977 |
| LKEYSSMDAFWQEGR                           | 1848.0             | 2            | 2.6649 | 0.3222 |



| Peptide Sequence                   | Peptide mass (m/z) | Charge State | Xcorr  | DelCn2 |
|------------------------------------|--------------------|--------------|--------|--------|
| LKGASLLPGKLPTLVSLFDDEDEEDNLFGGTAAK | 3563.0             | 3            | 3.7565 | 0.2    |
| LKGDDLQAIK                         | 1101.3             | 2            | 2.7551 | 0.2033 |
| LKGEATVSFDDPPSAK                   | 1662.8             | 3            | 3.309  | 0.2693 |
| LKGEIDASVPELEGDLRGPQVDVK           | 2565.9             | 3            | 4.3131 | 0.2616 |
| LKGELESSDQVR                       | 1361.5             | 3            | 3.763  | 0.3012 |
| LKGEMMDLQHGSFLR                    | 1876.2             | 3            | 3.6552 | 0.2234 |
| LKGFGYAEFEDLDSLLSALSLSNEESLGNRR    | 3345.7             | 3            | 5.4975 | 0.4967 |
| LKGIPVLVGLLDHPKK                   | 1728.2             | 3            | 3.2578 | 0.2535 |
| LKGIVPLAK                          | 939.2              | 2            | 2.7187 | 0.1135 |
| LKGLEAEVLR                         | 1128.3             | 2            | 2.7771 | 0.1921 |
| LKGLEAEVLRRLQEELAASDR              | 2241.5             | 3            | 3.3208 | 0.2152 |
| LKGLGAFVIDSDHLGHR                  | 1836.1             | 2            | 5.2738 | 0.5755 |
| LKGQEDSLASAVDAATEQK                | 1962.1             | 2            | 3.0052 | 0.2736 |
| LKSGNLEAIHIIK                      | 1493.8             | 3            | 4.296  | 0.342  |
| LKSGNLEAIHIIKK                     | 1621.9             | 2            | 3.8204 | 0.2392 |
| LKGTEDELDKYSEALKDAQEKLLEAEK        | 3095.4             | 3            | 7.0097 | 0.4987 |
| LKGTEDELDKYSEALKDAQEKLLEAEKK       | 3223.6             | 3            | 4.4938 | 0.2237 |
| LKGTVGEPTYDAEFQHFLR                | 2209.4             | 3            | 5.4772 | 0.381  |
| LKHEDTNLASSTIIR                    | 1698.9             | 2            | 3.3797 | 0.2185 |
| LKHEDTNLASSTLLR                    | 1698.9             | 3            | 3.3761 | 0.2949 |
| LKHELTDEELQSLFTNFANVVDK            | 2692.0             | 3            | 4.2115 | 0.2714 |
| LKHFHPLFEYFDYESR                   | 2129.4             | 3            | 4.8584 | 0.4285 |
| LKHLDFLKQPLATQK                    | 1781.1             | 2            | 3.8955 | 0.3599 |
| LKHMQFPPMYEENSR                    | 1908.2             | 2            | 4.0915 | 0.3245 |
| LKHYPGWVSMANAGK                    | 1717.0             | 3            | 4.5991 | 0.4203 |
| LKIPKNPELVPQNYISDSLAQSVVQHRLR      | 3188.7             | 3            | 3.3721 | 0.216  |
| LKKDEISVQHIR                       | 1466.7             | 2            | 3.6575 | 0.2817 |
| LKKDEISVQHIREELAELSK               | 2366.7             | 3            | 3.9094 | 0.3022 |
| LKKDTYIENEK                        | 1381.6             | 2            | 3.2301 | 0.2678 |
| LKKDTYIENEKLSIGK                   | 1880.2             | 3            | 4.6627 | 0.2629 |
| LKKEDIYAVEIVGGATR                  | 1863.1             | 2            | 5.804  | 0.4728 |
| LKKEIEELKQELIQAEIQNGVK             | 2582.0             | 3            | 5.6095 | 0.3361 |
| LKKLEEEQIILEDQNCK                  | 2074.4             | 2            | 6.1497 | 0.3984 |
| LKKTEMQEKNPLPSKETIEQEK             | 2630.0             | 3            | 4.0004 | 0.2493 |
| LKKTETQEK                          | 1105.3             | 2            | 2.722  | 0.1715 |
| LKKTETQEKNPLPSK                    | 1742.0             | 2            | 4.2625 | 0.3573 |

| Peptide Sequence                     | Peptide mass (m/z) | Charge State | Xcorr  | DelCn2 |
|--------------------------------------|--------------------|--------------|--------|--------|
| LKKTETQEK NPLPSKETIEQEK              | 2599.9             | 3            | 5.1614 | 0.3713 |
| LKKTETQEK NPLPSKETIEQEKQAGES         | 3072.4             | 3            | 5.7507 | 0.396  |
| LKKTETQEK NTLPTKETIEQEK              | 2617.9             | 3            | 4.8316 | 0.3272 |
| LKKTETQEK NTLPTKETIEQEK R            | 2774.1             | 3            | 5.8054 | 0.4092 |
| LKLDGLDEDEGEKEAR                     | 1688.8             | 2            | 4.688  | 0.4462 |
| LKLDSEQLPLRPK                        | 1537.8             | 2            | 3.6955 | 0.2806 |
| LKLEAELGNMQGLVEDFK                   | 2035.4             | 2            | 6.4707 | 0.4678 |
| LKLEAELGNMQGLVEDFKNK                 | 2277.6             | 3            | 6.1039 | 0.4783 |
| LKLEAELGNMQGLVEDFKNKYEDEINK          | 3169.6             | 3            | 5.5849 | 0.3743 |
| LKLEAELGNMQGLVEDFKNKYEDEINK R        | 3325.7             | 3            | 6.3363 | 0.4635 |
| LKLEDFAR                             | 1139.3             | 2            | 3.1752 | 0.1993 |
| LKLEESYDLEPF LR                      | 1753.0             | 2            | 3.5055 | 0.336  |
| LKLEPHEGLLLR                         | 1418.7             | 3            | 3.5072 | 0.2857 |
| LKLEPHEGLLLRFPYAA                    | 1968.3             | 2            | 4.2391 | 0.4012 |
| LKLGVTANDVKNV I I WGNHSSTQYPDVNHAK   | 3420.8             | 3            | 4.9521 | 0.3071 |
| LKLHCTPGDGQR                         | 1325.5             | 2            | 2.4279 | 0.1683 |
| LKLPAVVTADLR                         | 1296.6             | 2            | 3.2802 | 0.3712 |
| LKLPSIPLVPVSAQK                      | 1591.0             | 2            | 2.9317 | 0.2176 |
| LKLQHIQAPLSWELVR                     | 1932.3             | 2            | 2.4554 | 0.1461 |
| LKLSEELSGGR                          | 1189.3             | 2            | 3.5618 | 0.2568 |
| LKLSILYPATTGR                        | 1433.7             | 2            | 3.3359 | 0.2908 |
| LKMEDIKEVNQALK                       | 1660.0             | 2            | 3.8475 | 0.2107 |
| LKNAI I I QSFIR                      | 1416.7             | 2            | 2.424  | 0.2124 |
| LKNDNTEAFYK                          | 1343.5             | 2            | 3.5561 | 0.2202 |
| LKNEIPNSHILDQYR                      | 1841.1             | 2            | 4.5268 | 0.2806 |
| LKNGELENIKPK                         | 1383.6             | 2            | 3.6017 | 0.1934 |
| LKNITLDDASAPR                        | 1414.6             | 3            | 3.5383 | 0.2957 |
| LKNKHEAMITDLEER                      | 1828.1             | 3            | 5.573  | 0.532  |
| LKNNKEYLEFR                          | 1454.7             | 3            | 3.7253 | 0.2606 |
| LKNQSESHKQAQENLHDQVQE QK             | 2747.9             | 3            | 5.1265 | 0.3266 |
| LKNQVTQLKEQVPGFTPR                   | 2084.4             | 3            | 3.9964 | 0.2564 |
| LKNTKIEVLEEELR                       | 1715.0             | 2            | 2.6736 | 0.1345 |
| LKNTLTQT TENLR                       | 1532.7             | 2            | 3.2682 | 0.2042 |
| LKNWEEGGYFNTDKPHPR                   | 2189.4             | 3            | 3.9404 | 0.3217 |
| LKPAFIKPYGT VTAANSSFLTDGASAMLIMAE EK | 3575.2             | 3            | 6.1558 | 0.5139 |
| LKPATDKDGKPLLPEPEEKPKPR              | 2585.0             | 3            | 4.2311 | 0.2905 |

| Peptide Sequence                 | Peptide mass (m/z) | Charge State | Xcorr  | DelCn2 |
|----------------------------------|--------------------|--------------|--------|--------|
| LKPDEGGVEPVLNVSYKPQK             | 2198.5             | 3            | 4.2941 | 0.3575 |
| LKPEGLHQLLAGFEDK                 | 1796.1             | 2            | 2.4401 | 0.3318 |
| LKPGDLVGVNKDSYLILETLPTHEYDSR     | 3037.4             | 3            | 3.9123 | 0.29   |
| LKPGTMIEWGNNWAR                  | 1774.0             | 2            | 3.4886 | 0.2591 |
| LKPGYLEATVDWFR                   | 1695.9             | 3            | 4.5452 | 0.4867 |
| LKPNLGNLADLPNYR                  | 1642.8             | 2            | 3.9321 | 0.3103 |
| LKPPTLIHGQAPSAGLPSQKPK           | 2266.7             | 3            | 4.1539 | 0.3819 |
| LKPQLLQGVYAMGFNRPSK              | 2148.6             | 2            | 4.4876 | 0.3778 |
| LKPQYLEELPGQLK                   | 1656.9             | 2            | 3.0271 | 0.1935 |
| LKPTDVGLLAVIANNIITINKDQNVFDSK    | 3155.6             | 3            | 4.5223 | 0.351  |
| LKPVHGLIFLFK                     | 1412.8             | 2            | 2.5496 | 0.2124 |
| LKPYFLTDGTGTVTPANASGINDGAAAVVLMK | 3194.6             | 3            | 6.0512 | 0.5293 |
| LKQAKKEEAQAEIEQYR                | 1935.1             | 3            | 5.6053 | 0.4484 |
| LKQDGDSEFR                       | 1066.1             | 2            | 2.9838 | 0.2905 |
| LKQDQTYGDIYNFPIHAFDK             | 2286.5             | 3            | 3.4823 | 0.1897 |
| LKQEEETLSFIR                     | 1493.7             | 2            | 2.7648 | 0.219  |
| LKQEFHYIEEDLYR                   | 1884.1             | 2            | 3.8194 | 0.36   |
| LKQEMGGIVTELIR                   | 1587.9             | 2            | 2.9404 | 0.1925 |
| LKQENTQLVHR                      | 1366.6             | 2            | 2.7192 | 0.1803 |
| LKQETPAVLEDLHK                   | 1621.9             | 2            | 2.5001 | 0.1714 |
| LKQEFVVAATLQDIIR                 | 2008.3             | 3            | 3.7114 | 0.188  |
| LKQFVFDLHSGK                     | 1419.7             | 2            | 4.2478 | 0.3335 |
| LKQGLYRHPWDDISYVLPEHMSM          | 2817.2             | 3            | 4.2615 | 0.2097 |
| LKQIEEQTIKAQKELEEQTR             | 2443.7             | 3            | 5.3148 | 0.3341 |
| LKQIEEQTIKAQKELEEQTRK            | 2571.9             | 3            | 4.1673 | 0.2112 |
| LKQIEEQTKKAQKELEEQTR             | 2458.7             | 3            | 4.8203 | 0.196  |
| LKQIEHTLNEK                      | 1353.5             | 2            | 3.4135 | 0.1187 |
| LKQIGALQ                         | 871.1              | 2            | 2.7591 | 0.1142 |
| LKQLAVAHEK                       | 1137.4             | 2            | 2.9867 | 0.1243 |
| LKQLEPGAA                        | 927.1              | 2            | 2.484  | 0.277  |
| LKQLIDKETNDRK                    | 1601.8             | 2            | 3.7867 | 0.3381 |
| LKQMFNGADMNTFPTFK                | 1991.3             | 2            | 4.4429 | 0.411  |
| LKQMFNGADMNTFPTFKFEDPKFEVIEKPQA  | 3650.2             | 3            | 4.3098 | 0.2496 |
| LKQQSELQSQVR                     | 1444.6             | 2            | 3.9607 | 0.1916 |
| LKQSADSSSSR                      | 1166.2             | 2            | 2.5942 | 0.25   |
| LKQSAEEQAQAR                     | 1359.5             | 3            | 3.749  | 0.3405 |

| Peptide Sequence                   | Peptide mass (m/z) | Charge State | Xcorr  | DelCn2 |
|------------------------------------|--------------------|--------------|--------|--------|
| LKQSLPPGLAVK                       | 1251.5             | 2            | 3.045  | 0.2655 |
| LKQTEITSATQNQLLFHMLK               | 2345.7             | 3            | 3.8626 | 0.2941 |
| LKQVEDEKNSFR                       | 1493.6             | 2            | 3.7748 | 0.3186 |
| LKQVEDEKNSFREQLLEEEEEAK            | 2708.9             | 3            | 4.1563 | 0.2534 |
| LKQVEDEKNSFREQLLEEEEEAKHNLEK       | 3330.6             | 3            | 6.0427 | 0.4207 |
| LKSEDEERVHEEL                      | 1728.8             | 2            | 3.2962 | 0.2955 |
| LKSEDEPTR                          | 1075.2             | 2            | 3.0076 | 0.215  |
| LKSELHLLDFQGK                      | 1528.8             | 2            | 2.9146 | 0.1661 |
| LKSENQVLGQYIENLMSASSVFQTTDTKS      | 3220.6             | 3            | 4.8507 | 0.3518 |
| LKSFNLSALEK                        | 1250.5             | 2            | 3.3668 | 0.3101 |
| LKSIDNGIFVQLVQANSPASLVGLR          | 2641.1             | 3            | 5.6491 | 0.4106 |
| LKSLEAEILQLQEELASSER               | 2287.6             | 2            | 5.7049 | 0.3716 |
| LKSMEAEMIQLQEELAAAER               | 2291.6             | 2            | 4.5534 | 0.38   |
| LKSELQAIKTELTIQIK                  | 1931.3             | 2            | 3.8896 | 0.3166 |
| LKSSLEEFESR                        | 1178.3             | 2            | 2.7783 | 0.2339 |
| LKSSVNELTQK                        | 1247.4             | 2            | 2.6954 | 0.1564 |
| LKSVVGNLHR                         | 1123.3             | 2            | 2.9119 | 0.1354 |
| LKTDMYEGLPFFSKL                    | 1790.1             | 2            | 3.0774 | 0.1966 |
| LKTDVDVSLPKVEGDLKGPEIDVKAPK        | 2892.3             | 3            | 4.5874 | 0.3725 |
| LKTEGNEQMK                         | 1178.3             | 2            | 2.6376 | 0.1323 |
| LKTEKAPKDQVDIAVQELLQLK             | 2508.9             | 3            | 3.9379 | 0.2433 |
| LKTEQGGAHFSVSSLAEGSVTSVGSVNPAENFR  | 3364.6             | 3            | 5.4084 | 0.4236 |
| LKTETDKENAEVK                      | 1505.7             | 2            | 4.4194 | 0.2686 |
| LKTETDKENAEVKFKDFLLSLK             | 2598.0             | 3            | 3.7751 | 0.2728 |
| LKTIEIQATNALDEK                    | 1687.9             | 2            | 3.1069 | 0.1954 |
| LKTLLVNNNR                         | 1185.4             | 2            | 2.8286 | 0.1231 |
| LKTLPDEVLTKEVEELILTESK             | 2528.9             | 3            | 5.3745 | 0.3654 |
| LKTNHIGHTGYLNTVTVSPDGSLCASGGK      | 2929.3             | 3            | 5.1094 | 0.3408 |
| LKTNILQYASTRPPTLSPIPHIPR           | 2715.2             | 3            | 3.6285 | 0.1232 |
| LKTQMLDQEELLA STR                  | 1877.2             | 2            | 3.5548 | 0.3368 |
| LKTSPVEGLSGNPADLEK                 | 1856.1             | 2            | 4.9924 | 0.4241 |
| LKTSTSNVEQYQAMVTSLEESLNKEK         | 2959.3             | 3            | 4.4724 | 0.3287 |
| LKTVEELLETGLIQVATKEEELNAIR         | 2941.4             | 3            | 6.3426 | 0.4706 |
| LKTVEELLETGLIQVATKEEELNAIRTENSSLTK | 3802.3             | 3            | 6.3435 | 0.4973 |
| LKTVLELQYVLDKLGDDDEV R             | 2347.7             | 3            | 5.3706 | 0.4718 |
| LKTVLSANADHMAQIEGLMDDVDFK          | 2763.1             | 3            | 5.5413 | 0.3986 |

| Peptide Sequence                | Peptide mass (m/z) | Charge State | Xcorr  | DelCn2 |
|---------------------------------|--------------------|--------------|--------|--------|
| LKTVLSANADHMAQIEGLMDDVDFKAK     | 2962.4             | 3            | 5.166  | 0.3448 |
| LKVAAHEAEEESDNIAEDFLEGK         | 2545.7             | 3            | 3.57   | 0.2171 |
| LKVEGYSGTAGDSMAYHNGR            | 2114.3             | 3            | 4.3363 | 0.3394 |
| LKVESSPSR                       | 1003.1             | 2            | 2.5548 | 0.1568 |
| LKVESSPSRSDYINASPIIEHDPR        | 2712.0             | 3            | 3.2345 | 0.1292 |
| LKVFDGIPPPYDK                   | 1489.7             | 2            | 3.3397 | 0.2135 |
| LKVFDGIPPPYDKK                  | 1617.9             | 2            | 3.9833 | 0.2246 |
| LKVGLQVVAVK                     | 1154.5             | 2            | 2.8498 | 0.1791 |
| LKVPEWVDTVK                     | 1314.6             | 2            | 3.4074 | 0.2774 |
| LKVPPAINQFTQALDR                | 1812.1             | 3            | 5.8443 | 0.4241 |
| LKVQEQELTR                      | 1244.4             | 2            | 2.9791 | 0.1525 |
| LKVSELKEELK                     | 1316.6             | 2            | 3.9046 | 0.2152 |
| LKVSELKEELKK                    | 1444.7             | 2            | 4.1825 | 0.2921 |
| LKVTEGGEPYR                     | 1249.4             | 2            | 3.0631 | 0.2218 |
| LKYALTGDEVK                     | 1237.4             | 2            | 2.6038 | 0.1154 |
| LKYALTGDEVKK                    | 1365.6             | 2            | 3.9667 | 0.3202 |
| LKYISLAVLVVQNASLILSIR           | 2314.8             | 2            | 2.4571 | 0.1654 |
| LKYLAFRL                        | 1024.3             | 2            | 2.5209 | 0.1539 |
| LKYPLEEFVKENQQEEAR              | 2251.5             | 3            | 4.3091 | 0.1563 |
| LLAAGKVPQR                      | 1053.3             | 2            | 2.7514 | 0.1573 |
| LLAAGQLADALSQFHAAVDGDPDNYIAYYR  | 3240.5             | 3            | 6.5617 | 0.5641 |
| LLAAGQLADALSQFHAAVDGDPDNYIAYYRR | 3396.7             | 3            | 4.8793 | 0.2474 |
| LLAAHCIVGHQHMIPEALEEITK         | 2669.1             | 3            | 3.2992 | 0.1055 |
| LLAALLEDEGGSGRPLLQAAK           | 2123.4             | 2            | 3.8175 | 0.391  |
| LLADPTGAFGK                     | 1090.3             | 2            | 2.7496 | 0.2455 |
| LLADPTGAFGKETDLLLDDSLVSIFGNR    | 2979.3             | 3            | 5.7763 | 0.4607 |
| LLADPTGAFGKETDLLLDDSLVSIFGNRR   | 3135.5             | 3            | 4.736  | 0.3768 |
| LLADQAEAR                       | 987.1              | 2            | 3.5506 | 0.2776 |
| LLAEGHPDPAELQR                  | 1661.8             | 2            | 3.9794 | 0.3481 |
| LLAEKEREMAEMR                   | 1606.9             | 2            | 2.8768 | 0.1944 |
| LLAELPASVHALTGVDLSKIPLIK        | 2500.0             | 3            | 3.9489 | 0.2954 |
| LLAENNEIISNIRDSVINLSESVEDGPK    | 3070.4             | 3            | 5.9338 | 0.3325 |
| LLAEPVPGIK                      | 1037.3             | 2            | 2.6372 | 0.1288 |
| LLAEPVPGIKAEPDESAR              | 2007.2             | 2            | 4.4045 | 0.4549 |
| LLAHVRPPVSK                     | 1217.5             | 2            | 2.9528 | 0.1503 |
| LLAHVTLELQHYHQLLEK              | 2186.5             | 3            | 4.292  | 0.4114 |

| Peptide Sequence                  | Peptide mass (m/z) | Charge State | Xcorr  | DelCn2 |
|-----------------------------------|--------------------|--------------|--------|--------|
| LLALIYLAHASDVLENAFAPLLDEQYDLATKR  | 3589.1             | 3            | 6.2481 | 0.5653 |
| LLALYNQGHKPHIDSVWPF EK            | 2607.0             | 2            | 4.6714 | 0.41   |
| LLANMVYQYK                        | 1243.5             | 2            | 2.9777 | 0.271  |
| LLAPEAGSHPQQTQKLEEIKENAQDTMR      | 3164.5             | 3            | 4.0482 | 0.4238 |
| LLASAGQDNVVR                      | 1243.4             | 2            | 2.9107 | 0.279  |
| LLASSDPLAQIAEDKPYAELWMGTHPR       | 3011.4             | 3            | 4.9968 | 0.4535 |
| LLASTLVHSVK                       | 1168.4             | 2            | 3.2536 | 0.3449 |
| LLASTLVHSVKK                      | 1296.6             | 2            | 4.1079 | 0.3274 |
| LLATEQEDAATAVAK                   | 1359.5             | 2            | 4.4711 | 0.3985 |
| LLAVIEEQHK                        | 1180.4             | 2            | 2.4656 | 0.1562 |
| LLAVTGEQAQQAR                     | 1385.6             | 2            | 4.1051 | 0.3641 |
| LLCGLLAER                         | 988.2              | 2            | 3.6836 | 0.1814 |
| LLDAQLATGGIVDPR                   | 1539.8             | 2            | 4.2035 | 0.2025 |
| LLDAQLSTGGIVDPSK                  | 1614.8             | 2            | 4.7005 | 0.4725 |
| LLDAVDTYIPVPAR                    | 1543.8             | 2            | 4.0121 | 0.4642 |
| LLDAVDTYIPVPARDLEKPFLLPVEAVYSVPGR | 3655.2             | 3            | 6.1024 | 0.4727 |
| LLDDAMAADKSDEWFAK                 | 1927.1             | 2            | 3.9118 | 0.3581 |
| LLDDNGNIAEELSILK                  | 1758.0             | 2            | 4.8745 | 0.4339 |
| LLDEALKEVDQIELK                   | 1757.0             | 2            | 3.7147 | 0.1824 |
| LLDEEEATDNDLR                     | 1533.6             | 2            | 4.3667 | 0.4104 |
| LLDEEEATDNDLR AK                  | 1732.8             | 2            | 4.2513 | 0.1911 |
| LLDEQFAVLR                        | 1204.4             | 2            | 3.1115 | 0.1212 |
| LLDEVFFSEK                        | 1227.4             | 2            | 3.8407 | 0.2514 |
| LLDFGSLSNLQVTQPTVGMNFK            | 2410.8             | 2            | 5.1778 | 0.4228 |
| LLDFGSLSNLQVTQPTVGMNFKTPR         | 2765.2             | 3            | 4.3792 | 0.3435 |
| LLDGEAALPAVVFLHGLFGSK             | 2155.5             | 2            | 4.477  | 0.4291 |
| LLDIACWIHHK                       | 1349.6             | 2            | 3.5994 | 0.3002 |
| LLDIESQEELED FPLPTVQR             | 2372.6             | 3            | 4.8706 | 0.4332 |
| LLDKLVGEFLEVTCINPTFICDHPQIMSPLAK  | 3587.3             | 3            | 5.8056 | 0.4532 |
| LLDKTTVSHNTK                      | 1357.5             | 2            | 3.8205 | 0.3178 |
| LLDKTTVSHNTKR                     | 1513.7             | 2            | 3.9422 | 0.4023 |
| LLDKVELMLPEK                      | 1428.8             | 2            | 2.8323 | 0.1161 |
| LLDLELTSR                         | 1060.2             | 2            | 2.5357 | 0.1497 |
| LLDMDGIIVEK                       | 1246.5             | 2            | 4.0961 | 0.3034 |
| LLDPEDISVDHPDEK                   | 1722.8             | 2            | 3.2753 | 0.236  |
| LLDPEDVDVPQPDEK                   | 1709.8             | 2            | 3.2017 | 0.2311 |

| Peptide Sequence                | Peptide mass (m/z) | Charge State | Xcorr  | DelCn2 |
|---------------------------------|--------------------|--------------|--------|--------|
| LLDPEDVDVPQPDEKSIITYVSSLYDAMPR  | 3407.8             | 3            | 4.7649 | 0.4394 |
| LLDQIVEK                        | 958.1              | 2            | 2.7501 | 0.2043 |
| LLDSEIKIMK                      | 1190.5             | 2            | 3.2524 | 0.2613 |
| LLDSLPSDTR                      | 1117.2             | 2            | 2.4495 | 0.1353 |
| LLDSSTVTHLFK                    | 1361.6             | 2            | 2.9499 | 0.32   |
| LLDSVEQDFHLEIAK                 | 1758.0             | 2            | 4.5878 | 0.3837 |
| LLDTNPEINQSDSQDSR               | 1933.0             | 2            | 4.8543 | 0.3968 |
| LLDTVDDMLANDIAR                 | 1675.9             | 2            | 3.7856 | 0.2889 |
| LLDVDNR                         | 844.9              | 2            | 2.4824 | 0.2001 |
| LLDVDNRVVLPIEAPIR               | 1933.3             | 3            | 5.07   | 0.2148 |
| LLDVVHPAAK                      | 1063.3             | 2            | 2.7606 | 0.3    |
| LLDYSLHKER                      | 1274.5             | 2            | 2.7213 | 0.2415 |
| LLDYTEKPLYENLRDILLQGLK          | 2649.1             | 3            | 4.0177 | 0.3321 |
| LLDYVPIGPR                      | 1143.4             | 2            | 2.4937 | 0.2677 |
| LLEAAAQSTK                      | 1032.2             | 2            | 3.3247 | 0.2943 |
| LLEAASVSSK                      | 1005.1             | 2            | 2.6107 | 0.2197 |
| LLEAFHNQGPVIKR                  | 1622.9             | 2            | 3.7999 | 0.3835 |
| LLEAHEEQNVDSYTESVKEYDSISR       | 2943.1             | 3            | 5.1064 | 0.3448 |
| LLEALDEMLTHDIAK                 | 1713.0             | 2            | 4.6196 | 0.3745 |
| LLEAQIASGGVVDVNSVFLPK           | 2254.6             | 2            | 5.5264 | 0.5306 |
| LLEAQIASGGVVDVNSVFLPKDVALAR     | 2880.3             | 3            | 5.4437 | 0.3463 |
| LLEAQIATGGIIDPEESHRLPVEVAYKR    | 3106.5             | 3            | 5.1871 | 0.1873 |
| LLEAQIATGGIIDPK                 | 1539.8             | 2            | 2.8055 | 0.1407 |
| LLEAQIATGGIIDPVHSHR             | 2028.3             | 3            | 3.4211 | 0.189  |
| LLEAQIATGGVIDPVHSHR             | 2014.3             | 2            | 4.2621 | 0.4219 |
| LLEAQIATGGVIDPVHSHRVPVDVAYR     | 2914.3             | 3            | 5.3207 | 0.4689 |
| LLEDGEDFNLGDALDSSNSMQTIQK       | 2741.9             | 3            | 6.6992 | 0.4416 |
| LLEDKNGEVQNLAVK                 | 1670.9             | 2            | 5.0321 | 0.3279 |
| LLEDRIAFTTNLTETEEEKSK           | 2496.7             | 3            | 4.3251 | 0.1939 |
| LLEDRIAFTTNLTETEEEKSKSLAK       | 2896.2             | 3            | 6.1463 | 0.4779 |
| LLEEANKYEK                      | 1237.4             | 2            | 2.6234 | 0.2191 |
| LLEEHSRIK                       | 1125.3             | 2            | 2.4465 | 0.1398 |
| LLEELEEGQKGVGDGTVSWGLEDDEDMTLTR | 3423.7             | 3            | 3.6504 | 0.1671 |
| LLEEQLQHEISNK                   | 1581.8             | 2            | 4.3484 | 0.3085 |
| LLEEQLQHEISNKMEEFK              | 2246.5             | 3            | 4.3001 | 0.3017 |
| LLEFELAQLTK                     | 1305.5             | 2            | 3.4121 | 0.1299 |

| Peptide Sequence               | Peptide mass (m/z) | Charge State | Xcorr  | DelCn2 |
|--------------------------------|--------------------|--------------|--------|--------|
| LLEFNQGKLPFAAAQIGNSFR          | 2322.7             | 2            | 5.5423 | 0.4975 |
| LLEFQLALKDCEECIQLEPTFIK        | 2725.2             | 3            | 4.5789 | 0.128  |
| LLEFYDATAHFAK                  | 1526.7             | 2            | 3.3129 | 0.2833 |
| LLEGEDAHLTQYK                  | 1517.7             | 2            | 3.6436 | 0.3362 |
| LLEGEDAHLTQYKK                 | 1645.8             | 2            | 3.7777 | 0.2082 |
| LLEGEDAHLTQYKKEPVTTR           | 2329.6             | 3            | 5.3435 | 0.4256 |
| LLEGEER                        | 975.0              | 2            | 2.7184 | 0.1608 |
| LLEGEESR                       | 933.0              | 2            | 2.7869 | 0.1244 |
| LLEGEESRLESGMQNMSIHTK          | 2390.7             | 3            | 6.3118 | 0.4472 |
| LLEGESEGTREESK                 | 1564.6             | 2            | 3.4919 | 0.242  |
| LLEGGKGGIADSVAK                | 1415.6             | 2            | 3.2001 | 0.1652 |
| LLEHKEIDGR                     | 1210.4             | 2            | 3.0475 | 0.2419 |
| LLEIDPYLKPYAVDFQR              | 2081.4             | 3            | 4.1251 | 0.3916 |
| LLEKDTHEKQDTLVALR              | 2010.3             | 2            | 5.711  | 0.4997 |
| LLEKPKDADNLFHEHEL GALNMAALLR   | 2923.4             | 3            | 4.0807 | 0.1762 |
| LLEKSDLHSVLAQK                 | 1581.8             | 2            | 3.2137 | 0.1371 |
| LLELFPVNR                      | 1101.3             | 2            | 2.4548 | 0.174  |
| LLELGPKPEVAQQTR                | 1679.9             | 2            | 3.9318 | 0.4152 |
| LLELGPKPEVAQQTRK               | 1808.1             | 3            | 3.3741 | 0.2667 |
| LLELQELVLR                     | 1226.5             | 2            | 3.989  | 0.2023 |
| LLELQYFISR                     | 1282.5             | 2            | 2.913  | 0.3158 |
| LLEMNLMHAPQVADAILGNQMFTHYDR    | 3130.6             | 3            | 7.1302 | 0.4767 |
| LLENMTEVVRK                    | 1332.6             | 2            | 3.2377 | 0.16   |
| LLEPLVTQVTTLVNTNSKGPSNK        | 2454.8             | 2            | 5.1623 | 0.4563 |
| LLEPSVGSFLFGDDEDDDLFSSAK       | 2457.6             | 2            | 4.9331 | 0.3977 |
| LLEPVLLL GK                    | 1095.4             | 2            | 2.7653 | 0.1954 |
| LLEPVLLL GKER                  | 1380.7             | 2            | 2.9423 | 0.335  |
| LLEQKTQESQK                    | 1332.5             | 2            | 3.0203 | 0.1866 |
| LLEQKVELAQLQEEWNEHNAK          | 2550.8             | 3            | 4.6114 | 0.1821 |
| LLEQLQEIGQEKEQLTQELQEAR        | 2755.0             | 3            | 5.6606 | 0.3335 |
| LLEQWEKDDDIIEGDLPEHKRPSAPVDFSK | 3524.8             | 3            | 5.813  | 0.4564 |
| LLEQYKEESK                     | 1267.4             | 2            | 3.3636 | 0.2828 |
| LLEQYKEESKK                    | 1395.6             | 2            | 3.8721 | 0.2252 |
| LLERLPEVEVPQHL                 | 1672.9             | 3            | 4.2685 | 0.2591 |
| LLESDYFR                       | 1043.2             | 2            | 2.6758 | 0.105  |
| LLESEAVNENLRK                  | 1515.7             | 2            | 4.0351 | 0.2657 |



| Peptide Sequence                        | Peptide mass (m/z) | Charge State | Xcorr  | DelCn2 |
|-----------------------------------------|--------------------|--------------|--------|--------|
| LLESKEELDSLMTDETIANVPILILGNKIDRPEAISEER | 4397.0             | 3            | 5.6432 | 0.5249 |
| LLETELLQEISEIEKR                        | 1944.2             | 2            | 4.0629 | 0.4118 |
| LLETHIHNQGLAAIEK                        | 1788.0             | 3            | 4.2593 | 0.3052 |
| LLETIDQLYLEYAK                          | 1713.0             | 2            | 4.6564 | 0.4482 |
| LLETKWTLLEQEQK                          | 1630.9             | 2            | 3.2729 | 0.1609 |
| LLETTDRPDGHQNNLR                        | 1880.0             | 3            | 3.7364 | 0.2105 |
| LLETTEEDKQK                             | 1334.5             | 2            | 3.2369 | 0.2087 |
| LLEVEHPAAK                              | 1107.3             | 2            | 3.0754 | 0.3028 |
| LLEVLSGERLPKPTK                         | 1681.0             | 2            | 2.9828 | 0.2156 |
| LLEVNQQSLLGLTHGEAVQLLR                  | 2432.8             | 3            | 5.5192 | 0.4343 |
| LLEVPMVLTEQYPQGLGPTVPELGTEGLRPLAK       | 3548.1             | 3            | 6.3847 | 0.4395 |
| LLEVQPQVANSPSSAAQK                      | 1868.1             | 2            | 4.4075 | 0.363  |
| LLEVSDDPQVLAVAAHDVGEYVR                 | 2496.8             | 3            | 4.4928 | 0.4627 |
| LLFEDWTYDDFR                            | 1620.7             | 2            | 2.9756 | 0.2611 |
| LLFEGAGSNPGDK                           | 1305.4             | 2            | 3.8244 | 0.2846 |
| LLFEGAGSNPGDKTLEDRLFHEVKNK              | 3192.5             | 3            | 3.6982 | 0.1248 |
| LLFGHSTEGDILELVDGHFDTK                  | 2444.7             | 3            | 5.6911 | 0.3936 |
| LLFSDGEKVIPR                            | 1374.6             | 2            | 2.5462 | 0.2185 |
| LLFSEDQQGGSLEQLLQR                      | 2062.3             | 2            | 5.8205 | 0.334  |
| LLFTVLGEPLIYLSFPER                      | 2195.6             | 2            | 3.079  | 0.2605 |
| LLGASELPIVTPALR                         | 1550.9             | 2            | 3.3267 | 0.2274 |
| LLGDLLPEAVR                             | 1196.4             | 2            | 2.496  | 0.1715 |
| LLGELLQDNAK                             | 1214.4             | 2            | 4.2093 | 0.3349 |
| LLGELLQDNAKLVPVLSAK                     | 2022.4             | 2            | 4.9799 | 0.422  |
| LLGEREDVVHVHK                           | 1531.7             | 3            | 3.6539 | 0.2545 |
| LLGFGSALLDNVDPNPENFVGAGIIQTK            | 2901.3             | 3            | 6.61   | 0.4762 |
| LLGGVTIAQGGVLPNIQAVLLPK                 | 2272.8             | 2            | 6.104  | 0.4452 |
| LLGHEVEDVIK                             | 1365.6             | 2            | 3.2653 | 0.1907 |
| LLGHWEEAAHDLALACK                       | 1878.1             | 3            | 4.6132 | 0.4168 |
| LLGKVITIAQGGVLPNIQAVLLPK                | 2343.9             | 2            | 5.7479 | 0.3665 |
| LLGLGVTDFSR                             | 1178.4             | 2            | 3.8255 | 0.2525 |
| LLGLLFPLLAR                             | 1226.6             | 2            | 2.9886 | 0.1011 |
| LLGMGDIEGLIDKVNELKDDNEALIEK             | 3099.5             | 3            | 4.5445 | 0.3321 |
| LLGNTFVALSDLR                           | 1419.7             | 2            | 4.1617 | 0.3682 |
| LLGPDAAINLTDPDGALAK                     | 1866.1             | 2            | 5.2562 | 0.4792 |
| LLGPDAAINLTDPDGALAKR                    | 2022.3             | 2            | 5.5539 | 0.5316 |

| Peptide Sequence                  | Peptide mass (m/z) | Charge State | Xcorr  | DelCn2 |
|-----------------------------------|--------------------|--------------|--------|--------|
| LLGPGPAADFSVSVVER                 | 1615.8             | 2            | 4.2688 | 0.4376 |
| LLGPNASPDGLIPWTR                  | 1708.0             | 2            | 3.4984 | 0.1964 |
| LLGPSAAADILQLSSSLPLQSR            | 2238.6             | 2            | 6.0245 | 0.5475 |
| LLGPVLVKQELGEAR                   | 1622.9             | 2            | 3.6252 | 0.2746 |
| LLGQFSEKELAAEK                    | 1563.8             | 2            | 3.3565 | 0.1304 |
| LLGQFTLIGIPPAPR                   | 1593.9             | 2            | 3.6525 | 0.3505 |
| LLGQTDVAVYGVAVPGVEGK              | 1973.3             | 2            | 3.7191 | 0.3211 |
| LLGRVTIAQGGVLPNIQAVLLPK           | 2371.9             | 2            | 5.9797 | 0.4037 |
| LLGSDGSPLMDMLQLAEPPVQAGQELR       | 2996.4             | 3            | 4.0519 | 0.1842 |
| LLGTIYTAAEEIEAVGGK                | 1836.1             | 2            | 4.9695 | 0.4498 |
| LLGTQHGEENSALSPLNPGELLIALHNIDSVK  | 3309.7             | 3            | 4.3066 | 0.1881 |
| LLHDLQIGEKK                       | 1294.5             | 2            | 3.5892 | 0.3314 |
| LLHDQVGVVIQFGPYK                  | 1715.0             | 2            | 4.4413 | 0.3669 |
| LLHDQVGVVIQFGPYKQLFLQTYAR         | 2836.3             | 3            | 4.8311 | 0.4598 |
| LLHDSGLNVVVLEAR                   | 1635.9             | 2            | 4.428  | 0.305  |
| LLHEVQELTTEVEK                    | 1668.9             | 2            | 4.3463 | 0.3054 |
| LLHEVQELTTEVEKIK                  | 1910.2             | 2            | 4.8886 | 0.3993 |
| LLHGMKDDIVPWHTSMQVADR             | 2450.8             | 3            | 3.4539 | 0.1553 |
| LLHGVMEQLGIAR                     | 1437.7             | 2            | 4.0343 | 0.4207 |
| LLHGVMEQLGIARP                    | 1534.9             | 2            | 4.3151 | 0.393  |
| LLHGVMEQLGIARPR                   | 1691.0             | 2            | 4.6135 | 0.4057 |
| LLHIEELR                          | 1023.2             | 2            | 2.4387 | 0.1563 |
| LLHIEELRELQTK                     | 1622.9             | 2            | 4.266  | 0.2864 |
| LLHIEELRELQTKINEAIVAVQAIADPK      | 3269.8             | 3            | 4.6727 | 0.4282 |
| LLHINATALLEYPEYSGPLLPAVAVPGPSALDR | 3519.0             | 3            | 5.039  | 0.3541 |
| LLHKYPFILPHQQVVDK                 | 1977.3             | 2            | 4.2425 | 0.4    |
| LLHKYPFILPHQQVVDKGAIK             | 2346.8             | 3            | 4.2837 | 0.42   |
| LLHQVVEQLQK                       | 1335.6             | 2            | 3.1633 | 0.2459 |
| LLHSFHSELPVLSDSER                 | 1967.2             | 2            | 5.0038 | 0.5002 |
| LLHTLEGHAMPIR                     | 1488.8             | 2            | 3.4941 | 0.3117 |
| LLHVAVSDVNDVRR                    | 1708.9             | 2            | 4.0148 | 0.382  |
| LLHYLGHVNVNGPTTPIPVK              | 2187.6             | 3            | 4.675  | 0.4174 |
| LLIDEAILK                         | 1028.3             | 2            | 3.0682 | 0.1017 |
| LLIEMEQR                          | 1032.2             | 2            | 2.6469 | 0.1363 |
| LLIEMEQRLEQQQAIDDLMPAQK           | 2671.1             | 3            | 3.4481 | 0.2327 |
| LLIGTLYHR                         | 1086.3             | 2            | 2.6841 | 0.242  |

| Peptide Sequence           | Peptide mass (m/z) | Charge State | Xcorr  | DelCn2 |
|----------------------------|--------------------|--------------|--------|--------|
| LLIHLHPR                   | 999.2              | 2            | 2.8509 | 0.2074 |
| LLIHQSLAGGIIGVK            | 1519.9             | 2            | 3.9938 | 0.3605 |
| LLIIGDSGVGK                | 1072.3             | 2            | 3.1504 | 0.1841 |
| LLIIGNSSVGK                | 1101.3             | 2            | 2.7603 | 0.1013 |
| LLIPGNYKLTASAPGYLAITK      | 2205.6             | 3            | 3.8325 | 0.2657 |
| LLIQESVWDEAMR              | 1590.8             | 2            | 2.9685 | 0.3349 |
| LLIQVGHEPMPPTLGTNVLGR      | 2243.7             | 2            | 3.3163 | 0.2727 |
| LLISHLSGIR                 | 1109.3             | 2            | 2.8879 | 0.1954 |
| LLIVSTTPYSEKDTK            | 1695.9             | 2            | 3.4745 | 0.3703 |
| LLKDAEALSQR                | 1244.4             | 2            | 3.608  | 0.3098 |
| LLKDAEALSQRLEEK            | 1744.0             | 2            | 4.1367 | 0.2756 |
| LLKEEKEELADQVLTLLK         | 2000.3             | 3            | 3.525  | 0.1911 |
| LLKEGEEPTVYSDEEPEKDESAR    | 2651.8             | 3            | 5.5306 | 0.3778 |
| LLKEGFENESKR               | 1450.6             | 2            | 2.6237 | 0.1383 |
| LLKEGSSNQR                 | 1132.3             | 2            | 2.4697 | 0.1781 |
| LLKELEQANANHPHR            | 1699.9             | 2            | 3.8538 | 0.4311 |
| LLKEQEIEDQKNPR             | 1740.9             | 2            | 4.3152 | 0.2355 |
| LLKFDQLNIQR                | 1388.6             | 2            | 3.3518 | 0.2123 |
| LLKGIDRYNPENLATLER         | 2116.4             | 3            | 3.7501 | 0.1582 |
| LLKNQEADQHSAR              | 1510.6             | 2            | 3.9229 | 0.3414 |
| LLKNQSQYEK                 | 1251.4             | 2            | 2.9176 | 0.1335 |
| LLKPGEEPSEYTDEEDTKDHNKQD   | 2818.9             | 3            | 5.4899 | 0.4176 |
| LLLATMESMNGGK              | 1365.6             | 2            | 4.8145 | 0.3809 |
| LLLEFTDTSYEEK              | 1588.7             | 2            | 4.3893 | 0.4059 |
| LLLEGISSTHAHHLR            | 1684.9             | 2            | 4.6348 | 0.4809 |
| LLLEGISSTHVNHHLR           | 1689.9             | 2            | 3.7359 | 0.4357 |
| LLLETHLPSK                 | 1151.4             | 2            | 2.7328 | 0.1521 |
| LLLETHLPSKK                | 1279.6             | 2            | 3.3501 | 0.2901 |
| LLLEVQHASK                 | 1138.3             | 2            | 2.6874 | 0.1968 |
| LLLEYTDSSYEEK              | 1590.7             | 2            | 3.738  | 0.3085 |
| LLLFDAAPDLR                | 1173.4             | 2            | 2.8407 | 0.2512 |
| LLLFDLIPVVSAGWPEGAR        | 2153.6             | 2            | 2.4109 | 0.118  |
| LLLFDYDKVELANMNR           | 1955.3             | 2            | 3.1172 | 0.3624 |
| LLLFSDGNSQGATPAAIEK        | 1933.2             | 2            | 6.0163 | 0.4288 |
| LLLFSDGNSQGATPAAIEKAVQEAQR | 2716.0             | 3            | 5.1586 | 0.414  |
| LLLGAGAVAYGVR              | 1260.5             | 2            | 4.341  | 0.4001 |

| Peptide Sequence                      | Peptide mass (m/z) | Charge State | Xcorr  | DelCn2 |
|---------------------------------------|--------------------|--------------|--------|--------|
| LLLGPNPAAVAAAGDLTSEEEEGQSLWSSILSEVSTR | 3786.1             | 3            | 5.4417 | 0.4317 |
| LLLHDKDR                              | 1010.2             | 2            | 2.6272 | 0.1126 |
| LLLHYSYQACKNNICLDLSPSHGLDGR           | 2966.4             | 3            | 5.1039 | 0.3819 |
| LLLIGDSGVGK                           | 1072.3             | 1            | 2.5858 | 0.3146 |
| LLLIGNSSVGK                           | 1101.3             | 2            | 2.634  | 0.1439 |
| LLLINNAGSLGDVSK                       | 1514.7             | 2            | 3.8482 | 0.3669 |
| LLLAGVDRDLKDLTIGQMGGK                 | 2398.9             | 3            | 4.126  | 0.2967 |
| LLLESVSGLLQPR                         | 1538.9             | 2            | 3.6985 | 0.2279 |
| LLLLGAGESGK                           | 1058.3             | 2            | 3.6913 | 0.2061 |
| LLLLGAGESGKSTIVK                      | 1586.9             | 2            | 3.762  | 0.3707 |
| LLLNNDNLLR                            | 1198.4             | 2            | 3.0801 | 0.2004 |
| LLLPGELAK                             | 954.2              | 2            | 2.8115 | 0.1536 |
| LLLPGELAKHAVSEGTK                     | 1764.1             | 2            | 4.2168 | 0.474  |
| LLLPGELAKHAVSEGTKAVTK                 | 2163.5             | 2            | 4.1536 | 0.5648 |
| LLLPWLEAR                             | 1111.4             | 2            | 2.6359 | 0.1478 |
| LLLQGLMDSVEAK                         | 1417.7             | 2            | 3.9106 | 0.2838 |
| LLLQLEATK                             | 1029.3             | 2            | 2.5977 | 0.1376 |
| LLLQVESLTTELSAER                      | 1803.0             | 2            | 2.8315 | 0.1147 |
| LLLQVQHASK                            | 1137.4             | 2            | 2.9712 | 0.145  |
| LLLSSETPIEGK                          | 1287.5             | 2            | 3.2878 | 0.2707 |
| LLLVSFDGFR                            | 1167.4             | 2            | 3.2145 | 0.1619 |
| LLLYHLHPFLQR                          | 1550.9             | 2            | 3.469  | 0.2987 |
| LLMHGKEVGSIIIGK                       | 1482.8             | 2            | 3.7882 | 0.4332 |
| LLMMAGIDDCYTSAR                       | 1661.0             | 2            | 2.4835 | 0.1158 |
| LLNDEDPVVVTK                          | 1342.5             | 2            | 3.7311 | 0.3451 |
| LLNDEDQVVVVK                          | 1386.5             | 2            | 4.0025 | 0.2409 |
| LLNENSYVPR                            | 1205.3             | 2            | 2.7494 | 0.2792 |
| LLNFPTIVER                            | 1202.4             | 2            | 2.8841 | 0.2043 |
| LLNLDGTCADSYVFSR                      | 2009.2             | 2            | 4.3367 | 0.2293 |
| LLNLGLITESQAHTLEDEVAEVLQK             | 2765.1             | 3            | 7.1737 | 0.5928 |
| LLNLGLITESQAHTLEDEVAEVLQKLISK         | 3206.7             | 3            | 5.2736 | 0.4599 |
| LLNNGDKWEAIAANIADYLYR                 | 2681.9             | 3            | 3.5889 | 0.1201 |
| LLNQEEGEYYNVPIPEGDEEGNMELR            | 3039.2             | 3            | 3.5371 | 0.2427 |
| LLNQEKSELLVEQGR                       | 1757.0             | 3            | 3.4904 | 0.1171 |
| LLNQPHHGAGIK                          | 1285.5             | 2            | 2.4797 | 0.1167 |
| LLNQREYEAQQQYR                        | 1968.1             | 3            | 3.5958 | 0.1527 |

| Peptide Sequence                        | Peptide mass (m/z) | Charge State | Xcorr  | DelCn2 |
|-----------------------------------------|--------------------|--------------|--------|--------|
| LLNSELADALGGLLNR                        | 1669.9             | 2            | 3.1199 | 0.2432 |
| LLNTFLER                                | 1006.2             | 2            | 2.7785 | 0.2043 |
| LLNYPEDPPGSEVLR                         | 1814.0             | 2            | 3.79   | 0.2344 |
| LLPDITLLEPVEGEAAEELSR                   | 2295.6             | 2            | 4.6253 | 0.3651 |
| LLPIDGANDLFFQPPPLTPTSK                  | 2382.7             | 3            | 3.6498 | 0.2848 |
| LLPLGATDTAVFDVR                         | 1588.8             | 2            | 4.372  | 0.5388 |
| LLPQLTYLDGYDR                           | 1567.8             | 2            | 2.5538 | 0.239  |
| LLPQLTYLDGYDRDDK                        | 1926.1             | 2            | 2.5999 | 0.256  |
| LLPSAPQTLPDGPLASPAR                     | 1902.2             | 2            | 4.1265 | 0.4195 |
| LLPTHPPDRKLSKNEVLR                      | 2114.5             | 2            | 2.4002 | 0.1291 |
| LLPVLLSTAQEADPEVR                       | 1852.1             | 2            | 3.6352 | 0.2412 |
| LLQAETASNSAR                            | 1261.4             | 2            | 4.0638 | 0.3794 |
| LLQAGFSELKETEKWNIKPEK                   | 2576.9             | 3            | 4.4548 | 0.3272 |
| LLQALVDILNEEN                           | 1484.7             | 2            | 4.5034 | 0.3766 |
| LLQAMEPVHVAR                            | 1364.6             | 2            | 2.4552 | 0.1567 |
| LLQAQGVVPSKDSLPLK                       | 1810.1             | 2            | 4.0328 | 0.3505 |
| LLQAQLQAQKEELQSLMHQPK                   | 2462.9             | 3            | 4.8614 | 0.3537 |
| LLQDFFNGK                               | 1082.2             | 2            | 2.9622 | 0.232  |
| LLQDFFNGKELNK                           | 1566.8             | 2            | 4.744  | 0.2144 |
| LLQDFFNGR                               | 1110.2             | 2            | 3.1384 | 0.2797 |
| LLQDFFNGRDLNK                           | 1580.8             | 2            | 3.8471 | 0.1622 |
| LLQDHPWLLSQNLVVKPDQLIK                  | 2599.1             | 3            | 6.7902 | 0.4906 |
| LLQDHPWLLSQNLVVKPDQLIKR                 | 2755.3             | 3            | 5.4995 | 0.4088 |
| LLQDKNEQAVQSAQTIQQLEDQLQQK              | 3026.3             | 3            | 6.1119 | 0.4549 |
| LLQDSVDFSLADAINTEFK                     | 2127.3             | 2            | 5.8488 | 0.5905 |
| LLQDSVDFSLADAINTEFKNTR                  | 2498.7             | 2            | 4.6382 | 0.4905 |
| LLQEALAEERGGTPAFLPSSLSPQSSLPASR         | 3340.7             | 3            | 5.9675 | 0.3991 |
| LLQEHNALK                               | 1180.3             | 2            | 3.0114 | 0.1498 |
| LLQEHSGIFGFSVSHTR                       | 2017.2             | 3            | 5.8994 | 0.5118 |
| LLQGRPPLDFYPPGVHPSGLVPR                 | 2513.9             | 3            | 4.546  | 0.3283 |
| LLQHGINADDKR                            | 1380.5             | 2            | 3.3389 | 0.3343 |
| LLQHHITEQLQDIVDILK                      | 2157.5             | 2            | 5.0756 | 0.3499 |
| LLQIIERYPEETLSLMTK                      | 2178.6             | 3            | 4.4423 | 0.4044 |
| LLQKGIHPTIISFSQK                        | 1940.3             | 2            | 3.46   | 0.162  |
| LLQLKSEEMQTVQQEQQLLQETQALQQSFLSEKDSLLQR | 4491.0             | 3            | 5.6648 | 0.4365 |
| LLQLQEQMR                               | 1159.4             | 2            | 3.4817 | 0.1604 |

| Peptide Sequence               | Peptide mass (m/z) | Charge State | Xcorr  | DelCn2 |
|--------------------------------|--------------------|--------------|--------|--------|
| LLQLVEDR                       | 986.1              | 1            | 1.6679 | 0.1679 |
| LLQPGPSEHSK                    | 1193.3             | 2            | 2.6239 | 0.2171 |
| LLQPPAPIMPLDTNWPLLTVSK         | 2445.9             | 3            | 4.045  | 0.3314 |
| LLQPVIVSPSGTILR                | 1593.9             | 2            | 3.126  | 0.1687 |
| LLQQEEEIKSLTAEIDR              | 2016.2             | 3            | 4.3084 | 0.3632 |
| LLQQEEEIKSLTAEIDRLK            | 2257.6             | 2            | 5.0578 | 0.3943 |
| LLQQGLAQVEAGR                  | 1383.6             | 2            | 4.5402 | 0.3543 |
| LLQQGTAPAQAK                   | 1226.4             | 2            | 3.3727 | 0.3212 |
| LLQQLFLKAPVNTAELTDLLIQNHIGSVIK | 3460.1             | 3            | 6.3316 | 0.3854 |
| LLQQSGAQQFR                    | 1276.4             | 2            | 2.9066 | 0.2118 |
| LLQQVSQIYQSIEFSR               | 1940.2             | 2            | 3.376  | 0.3802 |
| LLQSIGQAPESISEKELK             | 1971.2             | 2            | 4.2915 | 0.3604 |
| LLQSLGLK                       | 872.1              | 2            | 2.4923 | 0.2217 |
| LLQSNPVLEAFGNAK                | 1601.8             | 2            | 4.6683 | 0.4047 |
| LLQTAATAAQGGQANHPTAAVVTEK      | 2577.8             | 3            | 4.9389 | 0.2742 |
| LLQTSNITKLEQK                  | 1516.8             | 2            | 3.9776 | 0.2125 |
| LLQVPSSAFADVEVLGPAVTFK         | 2289.7             | 3            | 3.6396 | 0.1738 |
| LLQYSDALEHLLTTGQGVVLER         | 2456.8             | 3            | 5.9003 | 0.4659 |
| LLRAEELIQEIQR                  | 1611.9             | 2            | 3.256  | 0.2042 |
| LLRDPADASEAHHESSSR             | 1841.9             | 3            | 4.4274 | 0.3685 |
| LLREDRYMRLKEELQLSDEQLQK        | 2935.3             | 3            | 3.8208 | 0.1406 |
| LLREEKDELGEQVLGLK              | 1970.3             | 3            | 4.3742 | 0.3132 |
| LLREELQLLQEQGSYVGEVVR          | 2459.8             | 3            | 5.6965 | 0.4665 |
| LLRELQEAQNER                   | 1499.7             | 2            | 2.5038 | 0.129  |
| LLRFQSSHPTDITSLDQYVER          | 2643.9             | 3            | 3.9434 | 0.1633 |
| LLRGHDQYAYDGKDYIALNEDLR        | 2740.0             | 3            | 5.7533 | 0.3165 |
| LLRGHNQYAYDGKDYIALNEDLR        | 2739.0             | 3            | 3.9312 | 0.2535 |
| LLRPDAPAHPR                    | 1243.4             | 2            | 2.81   | 0.2216 |
| LLRSEESVSR                     | 1176.3             | 2            | 2.9987 | 0.2789 |
| LLRSEESVSRPPEIR                | 1914.2             | 2            | 3.7748 | 0.1358 |
| LLRVPDGLLSR                    | 1239.5             | 2            | 3.3215 | 0.273  |
| LLRYESSALPSGQLTSLSEYASR        | 2529.8             | 3            | 3.5808 | 0.2899 |
| LLSATGESEKQFQEAIIVFQEEFK       | 2773.1             | 3            | 3.7161 | 0.1908 |
| LLSDATVEKDESHAGKVVLRL          | 2168.4             | 3            | 5.0184 | 0.4403 |
| LLSDKLKEAETR                   | 1403.6             | 2            | 3.4101 | 0.2495 |
| LLSDPNYGVHLPVAVK               | 1623.9             | 2            | 2.4189 | 0.1778 |

| Peptide Sequence               | Peptide mass (m/z) | Charge State | Xcorr  | DelCn2 |
|--------------------------------|--------------------|--------------|--------|--------|
| LLSDQIALEASLISQIADSLKNTTSDVSR  | 3090.4             | 3            | 3.2886 | 0.2427 |
| LLSDSLPPSTGTFQEAQSR            | 2035.2             | 3            | 4.1867 | 0.4833 |
| LLSEEVDFDFSSGQITQVK            | 2028.2             | 2            | 3.7607 | 0.2695 |
| LLSEGADVNAK                    | 1117.2             | 2            | 3.0261 | 0.1112 |
| LLSEIEFLVNHMDLAK               | 1873.2             | 2            | 3.8685 | 0.2986 |
| LLSEKEVHTK                     | 1184.4             | 2            | 2.9862 | 0.2342 |
| LLSFLKDVYVDSKDPVSSLQVK         | 2481.9             | 3            | 4.715  | 0.2877 |
| LLSGDYEAVVTAVDPVADIATLR        | 2490.8             | 3            | 4.6008 | 0.4075 |
| LLSGVLFHSSPALQPAADHKPGPGA      | 2468.8             | 3            | 4.7107 | 0.3025 |
| LLSGVLFHSSPALQPAADHKPGPGAR     | 2625.0             | 3            | 4.5974 | 0.3786 |
| LLSKETSEELLPPPVTQTIK           | 2251.6             | 2            | 4.3495 | 0.437  |
| LLSKTPELNLDQFHDKTPYTIMFGPDK    | 3150.6             | 3            | 5.4104 | 0.3912 |
| LLSLLEKDEFK                    | 1335.6             | 2            | 3.1648 | 0.2077 |
| LLSLMDPLLPLSVLSK               | 1740.2             | 2            | 3.9866 | 0.1913 |
| LLSNPLMGDAVSDWSPMHEAAIHGHQLSLR | 3284.7             | 3            | 5.0691 | 0.4315 |
| LLSPFMPFVTEELFQR               | 1955.3             | 2            | 2.5497 | 0.2324 |
| LLSQHLPQR                      | 1092.3             | 2            | 3.19   | 0.2356 |
| LLSQTMKDHLVR                   | 1441.7             | 2            | 3.0082 | 0.3265 |
| LLSRPQDALEGVVLSPLSLEAR         | 2251.6             | 2            | 2.8666 | 0.1427 |
| LLSTELQAELSR                   | 1360.5             | 2            | 3.3343 | 0.2761 |
| LLTAHGQGYGK                    | 1145.3             | 2            | 2.9183 | 0.2368 |
| LLTEEGQKIGTFER                 | 1621.8             | 2            | 3.0992 | 0.2766 |
| LLTEKDAQIAMMQQR                | 1777.1             | 3            | 3.8386 | 0.2796 |
| LLTETEDWLYEEGEDQAK             | 2170.3             | 2            | 4.6515 | 0.4134 |
| LLTHHKDHFTK                    | 1377.6             | 2            | 2.7736 | 0.2884 |
| LLTHNLLSSHVR                   | 1390.6             | 2            | 3.6004 | 0.4325 |
| LLTIGDANGEIQR                  | 1400.6             | 2            | 2.5418 | 0.2057 |
| LLTPITTLTSEIQIK                | 1687.0             | 2            | 3.5826 | 0.332  |
| LLTPNPGYGTQAGPSPAPPTPEEEDLR    | 2903.1             | 3            | 4.8511 | 0.3748 |
| LLTPTHSFLAR                    | 1256.5             | 2            | 2.9271 | 0.2387 |
| LLTQHENIKNEIDNYEEDYQK          | 2637.8             | 3            | 5.0319 | 0.3569 |
| LLTQMSAGK                      | 949.2              | 2            | 2.6534 | 0.1245 |
| LLTQYILNLGK                    | 1276.5             | 2            | 3.4137 | 0.269  |
| LLTSFLPAQLLR                   | 1372.7             | 2            | 4.2784 | 0.3417 |
| LLTTIGKDLDFEK                  | 1493.7             | 2            | 2.9018 | 0.2675 |
| LLTTILHSDGDLTEQGKISKPDMSR      | 2757.1             | 3            | 3.8941 | 0.2611 |

| Peptide Sequence                    | Peptide mass (m/z) | Charge State | Xcorr  | DelCn2 |
|-------------------------------------|--------------------|--------------|--------|--------|
| LLTWDVKDTLLR                        | 1473.7             | 2            | 3.3704 | 0.3277 |
| LLTYNAAR                            | 922.1              | 2            | 2.6065 | 0.1862 |
| LLVEHQAI SFMLAEMAMK                 | 2063.5             | 2            | 3.1688 | 0.2332 |
| LLVFSTDAGFHFAGDGK                   | 1783.0             | 2            | 2.4821 | 0.2356 |
| LLVGNDDVHIIAR                       | 1435.7             | 2            | 2.4346 | 0.1584 |
| LLVGNKSDLTTK                        | 1289.5             | 2            | 3.2869 | 0.2608 |
| LLVGVDEKLN PEDIKK                   | 1811.1             | 3            | 5.0543 | 0.3557 |
| LLVLYSGEDDELLQR                     | 1764.0             | 2            | 3.0526 | 0.2702 |
| LLVPYLMEAIR                         | 1318.7             | 2            | 4.1664 | 0.3706 |
| LLVQDKFEVLNYTSIPIFLPEVTIGAHQTDR     | 3559.1             | 3            | 3.8868 | 0.2743 |
| LLVRPTSSETPSAAELVSAIEELVK           | 2641.0             | 3            | 3.6457 | 0.1841 |
| LLVSASQDGK                          | 1018.1             | 2            | 2.7965 | 0.1913 |
| LLVSMCQGNRDENQSIHQMAQEDAQR          | 3117.4             | 3            | 6.1634 | 0.4407 |
| LLVSNLDFGVSDADIQELFAEFGTLKK         | 2971.4             | 3            | 3.6    | 0.3075 |
| LLVVDPETDEQLQK                      | 1627.8             | 2            | 3.7736 | 0.3515 |
| LLVVDPETDEQLQKLG VQVR               | 2280.6             | 3            | 3.4334 | 0.2474 |
| LLVVDRETDEFFKK                      | 1740.0             | 2            | 3.112  | 0.1312 |
| LLVVYPWTQR                          | 1275.5             | 2            | 2.815  | 0.1213 |
| LLYAF AEATVPK                       | 1323.6             | 2            | 3.4872 | 0.2103 |
| LLYAVNTHCHADHITGSGLLR               | 2292.6             | 3            | 3.6977 | 0.2944 |
| LLYDLADQLHAAVGASR                   | 1814.0             | 2            | 5.6098 | 0.3616 |
| LLYLLESTEDPVIIR                     | 1904.2             | 2            | 5.1869 | 0.4403 |
| LLYNNVSNFGR                         | 1297.4             | 2            | 3.8784 | 0.3197 |
| LLYNRPGTVSSLKK                      | 1576.9             | 2            | 3.4378 | 0.177  |
| LMALLGQALK                          | 1058.4             | 2            | 3.0635 | 0.2015 |
| LMASTQPFKDIINNTSLAELEKR             | 2621.0             | 3            | 3.6847 | 0.1973 |
| LMATLSNTNPSFVR                      | 1551.8             | 2            | 4.9907 | 0.5264 |
| LMDEFKIGELFSK                       | 1557.8             | 2            | 2.7947 | 0.1241 |
| LMDHGQSHPEDIDMYSTR                  | 2133.3             | 3            | 4.4519 | 0.278  |
| LMDHVGTEPSIKEDQVIQLMNAIFSK          | 2945.4             | 3            | 4.6195 | 0.3393 |
| LMDIKSRLEQEIATYR                    | 1967.3             | 3            | 3.5223 | 0.2781 |
| LMDLLADSREVIRNDGVLLLQALTR           | 2826.3             | 3            | 3.5379 | 0.205  |
| LMDLLDRHVEDGNVTVQHAALSALR           | 2775.1             | 3            | 4.5879 | 0.3656 |
| LMEDLDRNKDQEVNFQEYVTFLGALALIYNEALKG | 4062.6             | 3            | 4.576  | 0.2261 |
| LMEEIMSEKENK                        | 1481.7             | 2            | 4.0946 | 0.1456 |
| LMELFPANKQSVEHFTK                   | 2020.3             | 2            | 3.365  | 0.397  |



| Peptide Sequence            | Peptide mass (m/z) | Charge State | Xcorr  | DelCn2 |
|-----------------------------|--------------------|--------------|--------|--------|
| LMELHGEGSSSGK               | 1332.5             | 2            | 3.8169 | 0.3732 |
| LMELHGEGSSSGKATGDETGAK      | 2163.3             | 3            | 5.097  | 0.3003 |
| LMENMRNDIASHPPEVGSYAPR      | 2485.8             | 3            | 4.4196 | 0.2864 |
| LMEPIYLVEIQCEQVVGGIYGLNR    | 2934.5             | 3            | 4.3021 | 0.2245 |
| LMEPLKYAEQLPVAQIIHQKPK      | 2576.1             | 3            | 3.5149 | 0.2017 |
| LMEVMNHVLGK                 | 1271.6             | 2            | 3.2168 | 0.2524 |
| LMFEELR                     | 938.1              | 2            | 2.5329 | 0.179  |
| LMFNSPGFVEYVVDR             | 1774.0             | 2            | 3.0039 | 0.1446 |
| LMFTAFLPDSTGSFTR            | 1792.0             | 2            | 3.1237 | 0.386  |
| LMGEDEKPAAK                 | 1189.4             | 2            | 2.9685 | 0.2481 |
| LMGEDEKPAAKENSEGAGAK        | 2033.2             | 3            | 3.7311 | 0.2188 |
| LMGKDESTSR                  | 1124.3             | 2            | 2.4915 | 0.1354 |
| LMGLEALK                    | 875.1              | 2            | 2.4953 | 0.1462 |
| LMHGILTEQK                  | 1170.4             | 2            | 2.6059 | 0.1056 |
| LMIEMDGTENK                 | 1281.5             | 2            | 4.0493 | 0.2985 |
| LMIEMDGTENKSK               | 1496.7             | 2            | 3.619  | 0.2146 |
| LMKEILDKKVEK                | 1474.8             | 2            | 3.7323 | 0.1341 |
| LMKELEEIRK                  | 1289.6             | 2            | 2.4177 | 0.1241 |
| LMKLENSIIPVHK               | 1522.9             | 2            | 2.5486 | 0.1881 |
| LMLDLNKAK                   | 1046.3             | 2            | 2.42   | 0.1808 |
| LMLLLEVISGER                | 1373.7             | 2            | 4.1809 | 0.3048 |
| LMLRAADPGPGAELDPAAPPPAR     | 2284.6             | 3            | 3.8388 | 0.1164 |
| LMMDPLSGQNR                 | 1262.5             | 2            | 3.3278 | 0.2478 |
| LMMDPLTGLNR                 | 1261.5             | 2            | 2.4744 | 0.1432 |
| LMMSELENR                   | 1123.3             | 2            | 2.8456 | 0.1249 |
| LMNDFSAALNNFQAVQR           | 1940.2             | 2            | 3.3383 | 0.2888 |
| LMNESLMLVTALNPHIGYDK        | 2260.7             | 3            | 5.4209 | 0.4245 |
| LMNETTAVALAYGIYKQDLPALEEKPR | 3036.5             | 3            | 5.3705 | 0.3637 |
| LMNTGKQHTFVETESVR           | 1978.2             | 2            | 4.7591 | 0.395  |
| LMQDDNRGLEQGIQDNKITANLFR    | 2791.1             | 3            | 5.2279 | 0.2806 |
| LMQITSLHSLNAFLPIK           | 2040.5             | 3            | 4.0035 | 0.3165 |
| LMQLVDHR                    | 1012.2             | 2            | 2.8289 | 0.1555 |
| LMRKNDNGEIEKEK              | 1704.9             | 2            | 2.5599 | 0.1648 |
| LMSDPDSSIIDFYPEDFAIDLNGKK   | 2832.1             | 3            | 3.894  | 0.2153 |
| LMSNALSTVTR                 | 1193.4             | 2            | 2.734  | 0.202  |
| LMTDTINEPILLCR              | 1633.0             | 2            | 3.1325 | 0.3042 |

| Peptide Sequence                     | Peptide mass (m/z) | Charge State | Xcorr  | DelCn2 |
|--------------------------------------|--------------------|--------------|--------|--------|
| LMTIMDSMNDQELDSTDGAK                 | 2216.5             | 2            | 3.7636 | 0.4494 |
| LMTQAQLEEATR                         | 1391.6             | 2            | 3.8529 | 0.266  |
| LMTTGNNTVR                           | 1107.3             | 2            | 2.5543 | 0.2789 |
| LMVELSKSQDDEIGDGTTGVVVLGALLEEAEQLLDR | 3916.4             | 3            | 6.3625 | 0.4174 |
| LMVHNWEYLK                           | 1390.6             | 2            | 2.83   | 0.1947 |
| LMVHTVATFNSIK                        | 1461.8             | 2            | 3.3813 | 0.2896 |
| LMVHTVATFNSIKELNER                   | 2103.4             | 2            | 4.3955 | 0.4804 |
| LMYEHELEQLR                          | 1461.7             | 2            | 3.074  | 0.2126 |
| LMYGQEDVPKDVLEYVVFKEK                | 2402.7             | 3            | 4.5486 | 0.3492 |
| LMYNSSNPVLK                          | 1266.5             | 2            | 2.6102 | 0.1085 |
| LNAIQNNLTK                           | 1292.5             | 2            | 3.7758 | 0.2818 |
| LNAKEIVLK                            | 1028.3             | 2            | 2.7368 | 0.1491 |
| LNATNIELATVQPGQNFHMFTK               | 2475.8             | 2            | 3.8978 | 0.3056 |
| LNATNIELATVQPGQNFHMFTKEELEEVK        | 3445.9             | 3            | 4.7154 | 0.2358 |
| LNATNIELATVQPGQNFHMFTKEELEEVKDI      | 3674.1             | 3            | 4.4042 | 0.3588 |
| LNDGHFMPVLGFGTYAPAEVPK               | 2361.7             | 2            | 4.4861 | 0.4149 |
| LNDGHFMPVLGFGTYAPAEVPSK              | 2577.0             | 3            | 4.6112 | 0.4045 |
| LNDGHFMPVLGFGTYAPPEVPR               | 2415.8             | 2            | 5.2113 | 0.462  |
| LNDGHFMPVLGFGTYAPPEVPSK              | 2631.0             | 3            | 5.626  | 0.3404 |
| LNDGSQITYEK                          | 1268.4             | 2            | 3.8547 | 0.2206 |
| LNDHFPLVVWQTGSGTQTNMNVNEVISNR        | 3272.6             | 3            | 5.7195 | 0.44   |
| LNDHLLLVYTGK                         | 1386.6             | 2            | 2.739  | 0.2518 |
| LNSDNKILVQQTLNILQQLAVAMGPNIK         | 3078.6             | 3            | 3.7644 | 0.2166 |
| LNDYIFSFDK                           | 1262.4             | 2            | 3.3401 | 0.2681 |
| LNDYLQIETIQALEELAAK                  | 2176.5             | 2            | 4.9886 | 0.3385 |
| LNEAAAGLNQAATELVQASR                 | 2028.2             | 2            | 6.2649 | 0.5385 |
| LNEAKEEFTSGGPLGQK                    | 1806.0             | 2            | 5.4137 | 0.4519 |
| LNEALQAER                            | 1044.1             | 2            | 2.7053 | 0.1806 |
| LNEELKVDEETQEVLENLKDR                | 2544.8             | 3            | 6.7371 | 0.3793 |
| LNEGVVEFASYGDLKNAIEK                 | 2197.4             | 2            | 3.6226 | 0.2289 |
| LNEHFLNTTDFLDTIK                     | 1922.1             | 2            | 5.2538 | 0.432  |
| LNEHFLNTTDFLDTIKSNLDR                | 2507.7             | 3            | 5.6963 | 0.537  |
| LNEIDKESQKPFVK                       | 1805.0             | 3            | 3.8178 | 0.1218 |
| LNEIDKESQKPFVKGPLPVHTK               | 2635.0             | 3            | 5.2183 | 0.2472 |
| LNEILQAR                             | 957.1              | 2            | 3.2103 | 0.1117 |
| LNEIVDAANAVISHIDQTALAVYIAMK          | 2885.3             | 2            | 5.7906 | 0.3766 |

| Peptide Sequence                 | Peptide mass (m/z) | Charge State | Xcorr  | DelCn2 |
|----------------------------------|--------------------|--------------|--------|--------|
| LNEKNYELLK                       | 1264.5             | 3            | 3.7975 | 0.1639 |
| LNELESDLTFK                      | 1309.4             | 2            | 3.2344 | 0.1835 |
| LNELGLLPLLLK                     | 1336.7             | 2            | 3.252  | 0.1499 |
| LNELMSQIR                        | 1104.3             | 2            | 3.087  | 0.2562 |
| LNEQHQLILSK                      | 1323.5             | 2            | 2.7991 | 0.1973 |
| LNEQYEHASIHLDLLEGGK              | 2296.5             | 3            | 5.5614 | 0.4979 |
| LNETDTPDKK                       | 1161.2             | 2            | 2.711  | 0.1332 |
| LNETTETQR                        | 1092.1             | 2            | 2.9983 | 0.3046 |
| LNFVAVSR                         | 878.0              | 2            | 3.0495 | 0.2947 |
| LNFEAAWDEVGDEFEKEETFTLSTIK       | 3050.3             | 3            | 3.3366 | 0.1549 |
| LNFEALDALK                       | 1164.3             | 2            | 2.8606 | 0.2492 |
| LNFGDDIPSALR                     | 1318.5             | 2            | 2.4713 | 0.105  |
| LNFSHGTHEYHAETIK                 | 1885.0             | 2            | 5.4546 | 0.5058 |
| LNFSHGTHEYHAETIKNVR              | 2254.4             | 2            | 5.6122 | 0.4411 |
| LNGHVVVKDLDIFDR                  | 1741.0             | 3            | 4.6844 | 0.3798 |
| LNGLENRVEVGKDQEFVTDTR            | 2420.6             | 3            | 4.292  | 0.2143 |
| LNGPQDHSHELLYSTIPR               | 1949.2             | 2            | 2.4107 | 0.1356 |
| LNGTDPEDVIR                      | 1229.3             | 2            | 3.3608 | 0.2897 |
| LNHKYNPVSLPK                     | 1410.6             | 3            | 3.2873 | 0.2325 |
| LNHLSFAELLKPFSSR                 | 1773.1             | 2            | 4.132  | 0.2493 |
| LNHLVDSLQQLR                     | 1436.6             | 2            | 3.2982 | 0.2671 |
| LNHPVTHVDQSSDNIIETLNHEHYECK      | 3287.6             | 3            | 4.1719 | 0.1448 |
| LNHQVSEVFNTVAQELLQR              | 2226.5             | 3            | 3.8774 | 0.2404 |
| LNHVAAGLVSPSLK                   | 1406.7             | 2            | 3.6305 | 0.3088 |
| LNHVAIAVPDLEK                    | 1419.7             | 2            | 3.7399 | 0.3236 |
| LNHVAIAVPDLEKAAAFYK              | 2071.4             | 3            | 3.972  | 0.2925 |
| LNIIISNLDCVNEVIGIR               | 1886.2             | 2            | 3.3679 | 0.3197 |
| LNINPEDGMADYSDPSYVK              | 2129.3             | 2            | 3.0439 | 0.2903 |
| LNIPVSQVNPR                      | 1237.4             | 2            | 3.1356 | 0.2991 |
| LNIPYENFYEALEK                   | 1743.9             | 2            | 4.0467 | 0.2859 |
| LNIQPSEADYAVDIR                  | 1704.9             | 2            | 4.7035 | 0.3943 |
| LNITVVQAK                        | 986.2              | 2            | 3.0224 | 0.1173 |
| LNKDIVISVGIYNLVQK                | 1917.3             | 2            | 3.8053 | 0.1195 |
| LNKDNNTLKDLLK                    | 1530.7             | 2            | 5.3285 | 0.2904 |
| LNKELASSEQKNKHINNELK             | 2324.5             | 3            | 4.9173 | 0.2348 |
| LNKPFLFDTKPLIVQYEVNFGNGIECGGAYVK | 3647.2             | 3            | 5.5197 | 0.4905 |

| Peptide Sequence                       | Peptide mass (m/z) | Charge State | Xcorr  | DelCn2 |
|----------------------------------------|--------------------|--------------|--------|--------|
| LNLDKMMMEQK                            | 1250.5             | 2            | 2.9683 | 0.1892 |
| LNLEAINYMAADGDFK                       | 1786.0             | 2            | 5.896  | 0.4897 |
| LNLEHIATSSAVSK                         | 1470.7             | 2            | 3.3016 | 0.214  |
| LNLGGDFIKESTATTFLR                     | 1984.2             | 2            | 4.6821 | 0.4681 |
| LNLGTVGFYR                             | 1140.3             | 2            | 2.7365 | 0.2387 |
| LNLIHSEISNLAGFEVEAIINPTNADIDLKDDLGNLTK | 4251.7             | 3            | 6.0229 | 0.4464 |
| LNLLDLDYELAEQLDNIAEK                   | 2333.6             | 2            | 6.8331 | 0.3804 |
| LNLNNTVLSK                             | 1116.3             | 2            | 3.0307 | 0.2599 |
| LNLVEAFVEDAELR                         | 1618.8             | 2            | 3.8337 | 0.3396 |
| LNMHMNVQNGK                            | 1286.5             | 2            | 2.6828 | 0.2736 |
| LNMHNLVEPVNKDLEFQLHEPFLLYR             | 3210.7             | 3            | 5.0958 | 0.3782 |
| LNNLVLFDK                              | 1076.3             | 2            | 2.705  | 0.1995 |
| LNNMNKYDYVLTGYTR                       | 1966.2             | 2            | 3.7085 | 0.3981 |
| LNPHRESDBGASDEAEESGSGKLVLEALR          | 2983.1             | 3            | 7.0714 | 0.4521 |
| LNPFLVDFGKEPLGPAHAHELRL                | 2548.9             | 3            | 4.8472 | 0.4019 |
| LNPVGAKFDPYEHEALFHTPVEGKEPGTVALVSK     | 3679.1             | 3            | 4.6011 | 0.3913 |
| LNQALLDLHALGSAR                        | 1592.8             | 2            | 4.9108 | 0.4761 |
| LNQDQLDAVSK                            | 1231.3             | 2            | 3.2802 | 0.2939 |
| LNQDQLDAVSKYQEVTTNNLEFAK               | 2668.9             | 3            | 4.9919 | 0.3953 |
| LNQPQPDFTK                             | 1188.3             | 2            | 3.3082 | 0.2312 |
| LNQQLLSKDEQLLHLSSQLEDSYNQVQSFSK        | 3622.0             | 3            | 6.7577 | 0.2826 |
| LNRLPAAGVGDMVMATVK                     | 1844.2             | 3            | 5.5865 | 0.4023 |
| LNRLPAAGVGDMVMATVKK                    | 1972.4             | 3            | 6.3139 | 0.4105 |
| LNRLTTDFNVIVEALSK                      | 1934.2             | 3            | 3.8724 | 0.1475 |
| LNRPRTLSEK                             | 1171.4             | 2            | 3.1259 | 0.2413 |
| LNRPRTLSEKIVYGHLDLDPASQEIER            | 2995.3             | 3            | 6.9238 | 0.5609 |
| LNRYNYIEGTK                            | 1371.5             | 2            | 2.8821 | 0.1078 |
| LNSDPQFVLAQNVGTTHDLLDICKR              | 2912.3             | 3            | 4.1507 | 0.3346 |
| LNSEGKLEQTVSMATTTQPMTQHLHVTYK          | 3275.7             | 3            | 4.4831 | 0.3003 |
| LNSELQQQLKDVLEER                       | 1943.1             | 2            | 3.3872 | 0.3125 |
| LNSELQQQLKEVHQR                        | 1980.2             | 3            | 3.3438 | 0.1959 |
| LNSGLGQLILKEEMEK                       | 1803.1             | 2            | 3.2117 | 0.2285 |
| LNSGLGQLILKEEMEKESR                    | 2175.5             | 3            | 4.2403 | 0.2811 |
| LNSHMDALHLGSQANR                       | 1764.9             | 2            | 2.9277 | 0.1009 |
| LNSKPQDLTDAYGPPSNFLEIDIFNPQTVGVGR      | 3605.0             | 3            | 5.2798 | 0.3706 |
| LNSLAIGLR                              | 957.2              | 2            | 2.9672 | 0.224  |

| Peptide Sequence                     | Peptide mass (m/z) | Charge State | Xcorr  | DelCn2 |
|--------------------------------------|--------------------|--------------|--------|--------|
| LNSNDEDIHTANER                       | 1628.6             | 2            | 4.7879 | 0.4205 |
| LNSNNALIEFLLEGTPEIR                  | 2144.4             | 2            | 3.2157 | 0.1372 |
| LNSNTQVVLLSATMPSDVLEVTK              | 2460.8             | 2            | 4.0447 | 0.3098 |
| LNSNTQVVLLSATMPSDVLEVTKK             | 2589.0             | 3            | 4.8077 | 0.2645 |
| LNSVQSSERPLFLVHPIEGSTTVFHSLASR       | 3310.7             | 3            | 6.6021 | 0.5322 |
| LNSWFQHRPPGASPER                     | 1880.1             | 3            | 3.4676 | 0.2663 |
| LNTAEDAQDVIKEIEDFDSLEALR             | 2736.0             | 3            | 4.8327 | 0.3599 |
| LNTAEDAQDVIKEIEDFDSLEALRLEGNTVGVEAAR | 3933.3             | 3            | 4.7571 | 0.3571 |
| LNTFGDEVFNPK                         | 1496.6             | 2            | 3.8288 | 0.377  |
| LNTQEIFDDWAR                         | 1508.6             | 2            | 4.5465 | 0.4574 |
| LNVDEAFEQLVR                         | 1433.6             | 2            | 4.2696 | 0.2173 |
| LNVEAVNTHR                           | 1153.3             | 2            | 2.8941 | 0.1756 |
| LNVFKNDQDTWDYTNPNLSGQGDPSNPVKR       | 3493.7             | 3            | 5.4863 | 0.4079 |
| LNVHKVTVLTLQDK                       | 1608.9             | 2            | 2.8401 | 0.3156 |
| LNVHMDSIPHHR                         | 1456.7             | 2            | 3.2142 | 0.3593 |
| LNVTEQEK                             | 961.1              | 2            | 2.8387 | 0.23   |
| LNVTEQEKIDK                          | 1317.5             | 2            | 3.2631 | 0.2056 |
| LNVTEQEKIDKLMIEMDGTENK               | 2579.9             | 3            | 6.3005 | 0.4049 |
| LNVTEQEKIDKLMIEMDGTENKSK             | 2795.2             | 2            | 4.5733 | 0.3371 |
| LNVWDIGGQR                           | 1158.3             | 2            | 3.1117 | 0.1084 |
| LNWGEPMHWHLDMYNR                     | 2100.4             | 2            | 4.4906 | 0.3813 |
| LNWLSVDFNWK                          | 1536.7             | 2            | 3.8205 | 0.2451 |
| LNYSDDHVIK                           | 1204.3             | 2            | 3.1949 | 0.1978 |
| LNYSDDHVIKWVR                        | 1645.8             | 2            | 3.1902 | 0.3197 |
| LNYYVDEGEANT                         | 1372.4             | 2            | 2.705  | 0.1074 |
| LPAAGVGDMVMATVK                      | 1460.8             | 2            | 4.0355 | 0.4404 |
| LPAAGVGDMVMATVKK                     | 1589.0             | 3            | 3.6916 | 0.3367 |
| LPAGAIHFQR                           | 1110.3             | 2            | 3.3194 | 0.3467 |
| LPALTVHVTQPK                         | 1304.6             | 2            | 2.9183 | 0.3279 |
| LPANHPLLTGQR                         | 1317.5             | 2            | 3.2608 | 0.3974 |
| LPASFDAR                             | 877.0              | 1            | 2.0827 | 0.1781 |
| LPATAAEPEAAVISNGEH                   | 1777.9             | 2            | 4.1897 | 0.2637 |
| LPATEKPVLLSK                         | 1296.6             | 2            | 3.7612 | 0.3664 |
| LPAVVQNAHSLVR                        | 1404.6             | 2            | 2.4947 | 0.1742 |
| LPAYLTIQMVR                          | 1305.6             | 2            | 3.8537 | 0.3327 |
| LPDGHELTFPNR                         | 1396.5             | 2            | 3.957  | 0.3354 |

| Peptide Sequence                              | Peptide mass (m/z) | Charge State | Xcorr  | DelCn2 |
|-----------------------------------------------|--------------------|--------------|--------|--------|
| LPDGHELTFFPNRLGSHLSYLSVR                      | 2747.1             | 3            | 4.0516 | 0.2041 |
| LPDGSEIPLPPILLGR                              | 1688.0             | 2            | 3.7689 | 0.3248 |
| LPDGSSFTNQFSPDAPLEEAR                         | 2279.4             | 2            | 4.9673 | 0.4629 |
| LPDGTSLTQTFR                                  | 1336.5             | 2            | 3.1053 | 0.1969 |
| LPDIFEAQIAGLR                                 | 1443.7             | 2            | 4.2483 | 0.4394 |
| LPDLSLDNMIGQSAIAGEEHPR                        | 2364.6             | 3            | 3.2077 | 0.1354 |
| LPDSQQQYNVVKTVKVTEQLRHCSEILK                  | 3285.8             | 3            | 4.709  | 0.1372 |
| LPDTGEGPSR                                    | 1029.1             | 2            | 2.4169 | 0.2543 |
| LPEDPLLSGLLDSPALK                             | 1779.1             | 2            | 4.5384 | 0.3626 |
| LPEEHIPFFLHNNR                                | 1764.0             | 3            | 4.3569 | 0.3885 |
| LPEELGRDQNTVETLQR                             | 1999.2             | 3            | 3.7087 | 0.2686 |
| LPEEWSQWLGGSSWPGYVRPLPPAAIESPAVAAPAYSR        | 4095.6             | 3            | 6.601  | 0.6135 |
| LPEFSFEKR                                     | 1153.3             | 2            | 2.5681 | 0.1217 |
| LPEGDLGKEIEQK                                 | 1456.6             | 2            | 2.9618 | 0.1998 |
| LPEIYIQLQR                                    | 1273.5             | 2            | 3.6013 | 0.2508 |
| LPENVVAMSNLSEAVQDADLLVFVIPHQFIHR              | 3604.1             | 3            | 4.1374 | 0.324  |
| LPESENLQEFWDNLIGGVDMVTDDRR                    | 3165.4             | 3            | 4.5698 | 0.3074 |
| LPETNLFETEETR                                 | 1579.7             | 2            | 3.7697 | 0.346  |
| LPETNLFETEETRK                                | 1707.9             | 2            | 4.1714 | 0.2054 |
| LPEVEVPQHL                                    | 1161.3             | 2            | 3      | 0.1371 |
| LPEYTLSQEGGPAHKR                              | 1784.0             | 2            | 4.5328 | 0.4719 |
| LPFAAAQIGNSFR                                 | 1392.6             | 2            | 3.6664 | 0.2787 |
| LPFPIIDDR                                     | 1086.3             | 2            | 3.3816 | 0.2866 |
| LPFTALGSGQDAALAVLEDR                          | 2045.3             | 2            | 3.7498 | 0.3284 |
| LPFTDGDAAQLQR                                 | 1489.6             | 2            | 2.7055 | 0.1864 |
| LPFTPLSYIQGLSHR                               | 1730.0             | 2            | 3.1224 | 0.2681 |
| LPGAIDVIGQTITISR                              | 1654.9             | 2            | 2.6734 | 0.1847 |
| LPGAWDPAAHQGGNGVLLLEGELIDVSR                  | 2773.1             | 3            | 4.0991 | 0.2823 |
| LPGDKGLVLMR                                   | 1286.6             | 2            | 3.7163 | 0.3404 |
| LPGHAGSINEVAFHPDEPIIISASSDKR                  | 2959.3             | 3            | 5.4953 | 0.4039 |
| LPGLLGNFPGPFEEEMK                             | 1876.2             | 2            | 4.4318 | 0.3778 |
| LPGPGQALPSAPGVVLGPEDLPVEVLQFHPTSDGILVSAAGTTVK | 4434.0             | 3            | 5.2042 | 0.5185 |
| LPGPTGSVVSTGTSFSSSSPGLASAGAAEGK               | 2766.0             | 3            | 5.4635 | 0.3928 |
| LPGSSSAAAAAAAAAAYNPHELLPLRPILRPR              | 3119.6             | 3            | 3.3544 | 0.183  |
| LPHIIGGSDLIAHHAR                              | 1708.0             | 2            | 4.4267 | 0.3738 |
| LPHLPGLEDLGIQATPLELK                          | 2155.5             | 2            | 5.0169 | 0.3366 |

| Peptide Sequence                 | Peptide mass (m/z) | Charge State | Xcorr  | DelCn2 |
|----------------------------------|--------------------|--------------|--------|--------|
| LPHSVLLEIQKELLDYK                | 2039.4             | 2            | 4.6705 | 0.3804 |
| LPHVLLLQLGTTFFK                  | 1728.1             | 2            | 4.2788 | 0.3622 |
| LPIFFFGTHETAFLGPK                | 1923.2             | 2            | 4.4373 | 0.4804 |
| LPIGDVATQYFADR                   | 1566.7             | 2            | 4.0495 | 0.4238 |
| LPILNQPSTQIVANAK                 | 1708.0             | 2            | 4.1871 | 0.3276 |
| LPIPESQVITINPELPEVEAAEDYAK       | 2867.2             | 3            | 5.8782 | 0.3685 |
| LPIPESQVITINPELPEVEAAEDYAKK      | 2995.4             | 3            | 6.0665 | 0.3158 |
| LPIPESQVITINPELPEVEAAEDYAKKLR    | 3264.7             | 3            | 4.7056 | 0.3868 |
| LPKDDVHAK                        | 1023.2             | 2            | 2.8091 | 0.2783 |
| LPKEEDSANLKPSELKK                | 1927.2             | 3            | 4.0925 | 0.1713 |
| LPLATIVKDLVAQAPLKPK              | 2016.5             | 3            | 4.9292 | 0.2857 |
| LPLDINPVVHPHGHIFK                | 1934.3             | 2            | 3.8907 | 0.3427 |
| LPLFGLGR                         | 873.1              | 2            | 2.4947 | 0.1841 |
| LPLHTLTSSTPVVLVR                 | 1734.1             | 2            | 3.875  | 0.4755 |
| LPLIFHLGR                        | 1066.3             | 2            | 3.1099 | 0.2252 |
| LPLLPEVR                         | 1074.3             | 2            | 2.8622 | 0.2323 |
| LPLQLDDAVRPEAEGER                | 2224.4             | 3            | 3.5818 | 0.1552 |
| LPLQLDDAVRPEAEGERATVNQDTR        | 3110.3             | 3            | 4.16   | 0.2824 |
| LPLVVEDFVK                       | 1159.4             | 2            | 2.4616 | 0.1337 |
| LPMPNLKDELHHSGWNTCSSCFGDSTK      | 3006.3             | 3            | 4.5915 | 0.2355 |
| LPNFGFVVFDDSEPVQK                | 1939.2             | 2            | 5.3083 | 0.4785 |
| LPNFGFVVFDDSEPVQR                | 1967.2             | 2            | 3.6103 | 0.3983 |
| LPNGLVIASLENYSPVSR               | 1930.2             | 2            | 3.0552 | 0.2129 |
| LPNLGKHEK                        | 1036.2             | 2            | 2.7246 | 0.2586 |
| LPNLTHLNLSGNK                    | 1421.6             | 3            | 3.5996 | 0.3624 |
| LPPKVESLESLYFTPIPAR              | 2158.5             | 3            | 4.1295 | 0.3642 |
| LPPLPVTPGMEGAGVVIIVGEGVSDR       | 2518.9             | 3            | 4.4504 | 0.2889 |
| LPPNTNDEVDEDPTGNK                | 1855.9             | 2            | 3.1827 | 0.2446 |
| LPPNVVAVPDVVQAAEDADILIFVVPHQFIGK | 3413.0             | 3            | 4.5759 | 0.4958 |
| LPPQDFLDRLSSLDNLK                | 1972.2             | 2            | 4.7645 | 0.3602 |
| LPPQDFLDRLSSLDNLKASVSQVEADLK     | 3100.5             | 3            | 6.6119 | 0.4831 |
| LPQEPGREQVVEDRPVGGGR             | 2119.3             | 3            | 3.2981 | 0.1179 |
| LPQLMLQSLSTSEELQRQFHLFQLQR       | 3172.7             | 3            | 3.4029 | 0.1465 |
| LPQLPITNFSR                      | 1286.5             | 2            | 2.6367 | 0.148  |
| LPQPEEGATYEGIQKK                 | 1789.0             | 2            | 4.8284 | 0.4007 |
| LPQPPEGQTYNN                     | 1358.4             | 2            | 2.881  | 0.2029 |

| Peptide Sequence                      | Peptide mass (m/z) | Charge State | Xcorr  | DelCn2 |
|---------------------------------------|--------------------|--------------|--------|--------|
| LPQTSDEKKDF                           | 1423.5             | 2            | 3.3311 | 0.3559 |
| LPRPPPEMPESLK                         | 1588.9             | 3            | 3.2493 | 0.1306 |
| LPRPPPEMPESLKK                        | 1717.1             | 3            | 4.8332 | 0.3996 |
| LPSDLHPIKVVVEGVKELSK                  | 2089.5             | 3            | 4.7121 | 0.3851 |
| LPSDVVTAVR                            | 1057.2             | 2            | 3.1019 | 0.1903 |
| LPSEGPRPAHVVGDLQAADVDK                | 2470.8             | 3            | 4.7866 | 0.3401 |
| LPSEGPRPAHVVGDLQAADVDKTVAGQDAVIVLLGTR | 3965.5             | 3            | 7.3253 | 0.4874 |
| LPSRPPLPGSGGSQSGAK                    | 1693.9             | 2            | 4.7847 | 0.3812 |
| LPSSPVYEDAASFK                        | 1511.7             | 2            | 2.4958 | 0.1781 |
| LPSVEEAIEVPKLPPASKDEDEDIQSILR         | 3203.5             | 3            | 5.8541 | 0.4669 |
| LPSVEGLHAIIVSDRDGVPVIK                | 2301.7             | 3            | 4.1341 | 0.4402 |
| LPTAADLLQIR                           | 1211.4             | 2            | 3.6313 | 0.3413 |
| LPTGYFFGASAGTGDLSDNHDIISMK            | 2732.0             | 3            | 6.3031 | 0.5544 |
| LPVDYYGIPFAAPTALASR                   | 2023.3             | 2            | 4.2977 | 0.442  |
| LPVNSPMNKGDTVMK                       | 1761.1             | 2            | 5.1534 | 0.4124 |
| LPVSEGVFVVKDPNGR                      | 1714.0             | 2            | 4.4545 | 0.4248 |
| LPYDVTPEQALAHEEVK                     | 1940.1             | 2            | 4.5693 | 0.4199 |
| LQAALDDEEAGGRPAMEPGNGSLDLGGDSAGR      | 3128.3             | 3            | 5.7494 | 0.3691 |
| LQAANAEDIKSGK                         | 1345.5             | 2            | 3.9191 | 0.405  |
| LQAAVDGPMDKKEE                        | 1531.7             | 2            | 4.4234 | 0.3403 |
| LQAAVEKLLLEAISETSSQLEHAK              | 2496.8             | 3            | 5.1996 | 0.3625 |
| LQAAYAGDKADDIQKR                      | 1763.9             | 2            | 5.2824 | 0.3986 |
| LQAEAPHIVVGTGPR                       | 1545.8             | 2            | 4.7873 | 0.4628 |
| LQAEAQQLR                             | 1057.2             | 2            | 2.5425 | 0.1219 |
| LQAEIDNIKNQR                          | 1442.6             | 2            | 4.0659 | 0.2709 |
| LQAEIEGLKGQR                          | 1342.5             | 2            | 3.5652 | 0.2218 |
| LQAEKADLLGIVSELQLK                    | 1969.3             | 3            | 5.3868 | 0.3589 |
| LQAENDASKEEVKEVLQALEELAVNYDQK         | 3305.6             | 3            | 5.5575 | 0.4032 |
| LQAGEYVSLGKVEAALK                     | 1777.1             | 2            | 4.5022 | 0.3735 |
| LQAIEHELHELGLLK                       | 1744.0             | 2            | 3.3616 | 0.3697 |
| LQAIEHELHELGLLKDHSLEGR                | 2538.8             | 3            | 7.6319 | 0.4658 |
| LQAILEDIQVTLFTR                       | 1761.1             | 2            | 3.0847 | 0.204  |
| LQAKDEQGPPIR                          | 1255.4             | 2            | 2.5709 | 0.1314 |
| LQAKKEEIK                             | 1200.5             | 2            | 3.0082 | 0.1063 |
| LQALANEQAAAAHELEK                     | 1808.0             | 2            | 5.3534 | 0.4434 |
| LQALANEQAAAAHELEKMQQSVYVKDDKIR        | 3399.8             | 3            | 3.7722 | 0.2644 |



| Peptide Sequence              | Peptide mass (m/z) | Charge State | Xcorr  | DelCn2 |
|-------------------------------|--------------------|--------------|--------|--------|
| LQALDTGWNELHK                 | 1525.7             | 2            | 4.2522 | 0.2632 |
| LQALKDTANR                    | 1130.3             | 2            | 3.3175 | 0.2295 |
| LQALQQMDGRNK                  | 1402.6             | 2            | 2.4368 | 0.1664 |
| LQAPQASVTAPSEQTTEFGIHKPHLGK   | 2874.2             | 3            | 3.5431 | 0.1731 |
| LQAQEHGAER                    | 1139.2             | 2            | 2.7349 | 0.2208 |
| LQAQLNELQAQLSQKEQAAEHYK       | 2669.9             | 3            | 3.819  | 0.256  |
| LQAQLNELQAQLSQKEQAAEHYKLQMEK  | 3299.7             | 3            | 3.9335 | 0.2908 |
| LQASNVTNKNDPK                 | 1429.6             | 2            | 3.3096 | 0.1858 |
| LQAVEVVITHLAPGTK              | 1677.0             | 2            | 4.9698 | 0.4424 |
| LQAVTDDHIR                    | 1168.3             | 2            | 3.018  | 0.3029 |
| LQAYHTQTTPLIEYYR              | 1998.2             | 2            | 5.6821 | 0.4832 |
| LQAYHTQTTPLIEYYRK             | 2126.4             | 2            | 5.1671 | 0.3781 |
| LQDAEIAR                      | 916.0              | 2            | 2.5563 | 0.1085 |
| LQDAFSAIGQNADLDLPQIAVVGGSAGK  | 2885.2             | 3            | 6.5143 | 0.5522 |
| LQDAYYIFQEMADK                | 1735.9             | 2            | 2.4273 | 0.1514 |
| LQDEANYHLYGSR                 | 1566.7             | 2            | 3.0684 | 0.2601 |
| LQDEIQNMKEEMAR                | 1736.0             | 2            | 4.838  | 0.3508 |
| LQDFKLDFGNSQ GK               | 1597.8             | 2            | 2.5984 | 0.138  |
| LQDFKSFLK DSETSQR             | 2043.3             | 3            | 3.5557 | 0.2315 |
| LQDFNVGDYIEAVLDR              | 1868.0             | 2            | 5.1496 | 0.4469 |
| LQDKATVLTTER                  | 1375.6             | 2            | 3.6835 | 0.3177 |
| LQDKLAATQK                    | 1116.3             | 2            | 3.2922 | 0.23   |
| LQDKQEHCSQLESHLK              | 1924.1             | 3            | 3.9486 | 0.1632 |
| LQDLTLRDLEK                   | 1344.5             | 2            | 3.0456 | 0.1082 |
| LQDMQEII SHYEEELTQLR          | 2376.6             | 3            | 4.5658 | 0.3519 |
| LQDNVREDLYEADKWVA AVGK        | 2491.7             | 3            | 5.1396 | 0.3624 |
| LQDPFSLYR                     | 1139.3             | 2            | 2.5461 | 0.1707 |
| LQDTYNLDTDTISK                | 1627.7             | 2            | 2.9493 | 0.2414 |
| LQDVFN TVGADIQLPQIVVVG TQSSGK | 2928.3             | 3            | 5.8488 | 0.4895 |
| LQDVHVAEGKK                   | 1224.4             | 2            | 3.2076 | 0.3281 |
| LQDYEEK                       | 925.0              | 2            | 2.8649 | 0.1168 |
| LQDYEEKTK                     | 1154.3             | 2            | 2.6768 | 0.14   |
| LQEAGILSAEELQR                | 1557.7             | 2            | 4.9422 | 0.3734 |
| LQEAQEREAATASQTR              | 1789.9             | 3            | 3.5701 | 0.2518 |
| LQEDTDKANK                    | 1162.2             | 2            | 3.0117 | 0.107  |
| LQEEEEAKSGHLSR                | 1484.6             | 2            | 3.4483 | 0.2652 |

| Peptide Sequence                    | Peptide mass (m/z) | Charge State | Xcorr  | DelCn2 |
|-------------------------------------|--------------------|--------------|--------|--------|
| LQEEITKQSPTLQR                      | 1671.9             | 2            | 4.5642 | 0.2686 |
| LQEELAKLSEK                         | 1288.5             | 2            | 3.0858 | 0.1198 |
| LQEELSQAESTIDELKEQVDAALGAEEMVEMLTDR | 3923.3             | 3            | 5.1431 | 0.4479 |
| LQEEMLQREEAENTLQSFR                 | 2352.6             | 2            | 4.6152 | 0.3529 |
| LQEEMLQREEAENTLQSFRQDVDNASLAR       | 3422.7             | 3            | 4.0748 | 0.3016 |
| LQEESQAASEQLR                       | 1489.6             | 2            | 2.4574 | 0.1827 |
| LQEESQAASEQLRK                      | 1617.7             | 2            | 4.3436 | 0.342  |
| LQEGDKILSVNGQDLK                    | 1758.0             | 2            | 5.1985 | 0.3396 |
| LQEGDKILSVNGQDLKNLLHQDAVDLFR        | 3180.6             | 3            | 3.9672 | 0.3332 |
| LQEGDLPNAVLLFEAAVQQDPK              | 2396.7             | 3            | 5.2115 | 0.2914 |
| LQEGYDHSYYFIATFITDHIR               | 2590.8             | 3            | 5.7838 | 0.532  |
| LQEKEDLQELNDR                       | 1630.7             | 2            | 4.8663 | 0.3179 |
| LQEKEDLQELNDRLAVYIDR                | 2461.7             | 3            | 3.7632 | 0.2803 |
| LQEKEELRELNDR                       | 1672.8             | 3            | 3.5317 | 0.1147 |
| LQELDAASK                           | 975.1              | 1            | 2.258  | 0.1931 |
| LQELEANPPSDVYLSSR                   | 1919.1             | 2            | 3.5096 | 0.3437 |
| LQENLQQLQHSTNQLAK                   | 1994.2             | 2            | 5.0699 | 0.3988 |
| LQEQEELENYIEHVLLR                   | 2156.4             | 2            | 5.6865 | 0.3458 |
| LQEQEELENYIEHVLLRR                  | 2312.6             | 3            | 3.5477 | 0.1393 |
| LQEQEELENYIEHVLLRRP                 | 2409.7             | 3            | 3.8353 | 0.1713 |
| LQEQLKAEDGSSSKEGTSV                 | 2123.2             | 3            | 5.3709 | 0.3672 |
| LQESQPGNAVIDK                       | 1399.5             | 2            | 2.4372 | 0.1225 |
| LQETLSAADR                          | 1104.2             | 2            | 3.2102 | 0.2122 |
| LQETSSQSYVEEQK                      | 1656.7             | 2            | 2.5643 | 0.1963 |
| LQEVEVPEDFGPVR                      | 1614.8             | 2            | 3.9576 | 0.2647 |
| LQEVFGHAIK                          | 1142.3             | 2            | 3.1898 | 0.1728 |
| LQEVITLLSLEK                        | 1515.8             | 2            | 4.6457 | 0.3185 |
| LQEYGSIFTGAQDPGLQR                  | 1981.2             | 2            | 3.3904 | 0.3007 |
| LQFHVDVAGDIFHQQCK                   | 1887.1             | 2            | 2.489  | 0.1786 |
| LQFHNVKPECLEAYNK                    | 1934.2             | 2            | 3.5976 | 0.3314 |
| LQGAHLTSILSHEEQMFVNR                | 2311.6             | 3            | 4.6762 | 0.346  |
| LQGEFQLR                            | 991.1              | 2            | 2.7471 | 0.1333 |
| LQGEGAEVQLTGK                       | 1330.5             | 2            | 4.1145 | 0.2797 |
| LQGEHQGSLIHPR                       | 1585.8             | 2            | 3.497  | 0.3146 |
| LQGEVEKYQQLQK                       | 1591.8             | 2            | 4.624  | 0.3156 |
| LQGEVVAFDYQSK                       | 1484.6             | 2            | 3.7033 | 0.3305 |

| Peptide Sequence                       | Peptide mass (m/z) | Charge State | Xcorr  | DelCn2 |
|----------------------------------------|--------------------|--------------|--------|--------|
| LQGGKDFNMPLTISSLK                      | 1850.2             | 2            | 3.3992 | 0.3457 |
| LQGGKDFNVPLSISR                        | 1631.9             | 2            | 3.9254 | 0.3875 |
| LQGGTPQEPPNPR                          | 1391.5             | 2            | 3.1008 | 0.2795 |
| LQGGVLVNEILNHMKR                       | 1822.2             | 2            | 3.4303 | 0.3097 |
| LQGHLLR                                | 837.0              | 2            | 2.6564 | 0.1075 |
| LQGIDLDRTVQQVNQEKQEK                   | 2370.6             | 3            | 3.6974 | 0.1184 |
| LQGPQTSAEVYR                           | 1349.5             | 2            | 2.6811 | 0.2257 |
| LQGVLDSTLNSK                           | 1275.4             | 2            | 2.9588 | 0.2136 |
| LQHAAELIK                              | 1023.2             | 2            | 2.53   | 0.178  |
| LQHAAQMEQK                             | 1184.4             | 2            | 2.9926 | 0.2287 |
| LQHIQAPLSWELVRPHIYGYAVK                | 2720.2             | 3            | 3.9344 | 0.3814 |
| LQHLENELTHDIITK                        | 1805.0             | 2            | 5.1423 | 0.4062 |
| LQHLQGSALQKPFHASR                      | 1919.2             | 2            | 4.9193 | 0.4778 |
| LQHTLQQVLDQREEVR                       | 1993.2             | 3            | 3.9823 | 0.3616 |
| LQHVEDGVLSMQVASAR                      | 1841.1             | 2            | 5.7782 | 0.4821 |
| LQHVTISQLFAPGDLPELGLHR                 | 2571.9             | 3            | 3.5886 | 0.2133 |
| LQIEIGKLR                              | 1070.3             | 2            | 2.746  | 0.1812 |
| LQIENEAAKDEVKEVLQALEELAVNYDQK          | 3331.7             | 3            | 5.669  | 0.3957 |
| LQILHIHTAR                             | 1202.4             | 2            | 3.2885 | 0.2632 |
| LQIQCVVEDDKVGTDMLEEQTAFEDYVQSMDVAAFNKI | 4438.0             | 3            | 6.816  | 0.5317 |
| LQIRHEQISDLER                          | 1637.8             | 2            | 2.7149 | 0.1709 |
| LQISHEAAACITGLR                        | 1583.8             | 2            | 3.3127 | 0.2485 |
| LQIWDTAGQER                            | 1317.4             | 2            | 2.6685 | 0.1935 |
| LQIWDTAGQESFR                          | 1551.7             | 2            | 4.4225 | 0.3496 |
| LQKADIEEIKSGR                          | 1487.7             | 3            | 3.2009 | 0.2724 |
| LQKDLEGLSQR                            | 1287.4             | 2            | 3.2288 | 0.2192 |
| LQKDLEGLSQRHEEK                        | 1811.0             | 2            | 3.4381 | 0.2041 |
| LQKEEEEIEFLYNENTVR                     | 2155.4             | 3            | 3.6933 | 0.2793 |
| LQKLPAELGPQLLHK                        | 1686.0             | 3            | 3.5409 | 0.2231 |
| LQKPTDSTASSR                           | 1291.4             | 2            | 2.8954 | 0.2551 |
| LQLDSPEDAEFIVAK                        | 1675.9             | 2            | 4.1657 | 0.3207 |
| LQLEETDHQKNLLDEELQR                    | 2352.5             | 3            | 5.0738 | 0.3197 |
| LQLEIDQKKDAENHEAQLK                    | 2251.5             | 3            | 4.3438 | 0.2344 |
| LQLEKVTTEAK                            | 1260.5             | 2            | 3.6806 | 0.1817 |
| LQLETEIEALKEELLFMK                     | 2178.6             | 2            | 6.2318 | 0.4535 |
| LQLETEIEALKEELLFMKK                    | 2306.7             | 2            | 5.1218 | 0.4287 |

| Peptide Sequence                    | Peptide mass (m/z) | Charge State | Xcorr  | DelCn2 |
|-------------------------------------|--------------------|--------------|--------|--------|
| LQLEYCSLSAASCEPLASVLR               | 2254.6             | 2            | 3.723  | 0.2478 |
| LQLFIQEVNHAVEETSHQALQNMPK           | 2906.3             | 3            | 6.1361 | 0.3925 |
| LQLHESQKDYK                         | 1389.5             | 2            | 3.0621 | 0.3241 |
| LQLHESQKDYSK                        | 1476.6             | 2            | 3.8263 | 0.2972 |
| LQLLEEKTDDEDEKTILNLENSNK            | 2718.0             | 3            | 5.1504 | 0.338  |
| LQLLEPFDKWDGKDLEDLQILIK             | 2771.2             | 3            | 5.3268 | 0.2874 |
| LQLLLLHTR                           | 1107.4             | 2            | 2.724  | 0.1312 |
| LQLLNPEIEAEQILMSPNSYIK              | 2544.9             | 2            | 4.2061 | 0.2121 |
| LQLLSNLFHGMDK                       | 1516.8             | 2            | 2.6774 | 0.1305 |
| LQLLTGEHRPEDEEELEKELYR              | 2728.0             | 3            | 5.8109 | 0.3731 |
| LQLLTGEHRPEDEEELEKELYREAR           | 3084.3             | 3            | 3.2333 | 0.1815 |
| LQLNEKPVQDLNIVLKDNDFLR              | 2626.0             | 3            | 4.0826 | 0.1274 |
| LQLNIVEMKDENATLDGGDVLFTGR           | 2750.1             | 3            | 5.1161 | 0.3109 |
| LQLQEQLQAETELCAEAEELR               | 2445.7             | 3            | 5.5253 | 0.4105 |
| LQLQYTLQELVSK                       | 1563.8             | 2            | 4.5788 | 0.363  |
| LQLSGHAMPR                          | 1110.3             | 2            | 2.5665 | 0.2933 |
| LQLSHDLLGILLKK                      | 1705.1             | 2            | 3.1169 | 0.2525 |
| LQMEAPHIIIVGTPGR                    | 1619.9             | 2            | 4.2842 | 0.433  |
| LQNAHTGLDLTVPQHQEVR                 | 2157.4             | 3            | 4.9883 | 0.2761 |
| LQNAIVNGVLQNTENTSK                  | 1944.1             | 3            | 3.2574 | 0.1347 |
| LQNALNEQRVEFATLQEALAHALTEK          | 2939.3             | 3            | 6.5161 | 0.4667 |
| LQNALNEQRVEFATLQEALAHALTEKEGKDQELAK | 3938.4             | 3            | 6.1782 | 0.5183 |
| LQNEILKDLSDGIHVVK                   | 1922.2             | 3            | 5.7095 | 0.4518 |
| LQNEILKDLSDGIHVVKDAR                | 2264.6             | 3            | 6.5236 | 0.4032 |
| LQNELDNVSTLLEEAEK                   | 1946.1             | 2            | 4.5931 | 0.39   |
| LQNELDNVSTLLEEAEKK                  | 2074.3             | 2            | 3.6125 | 0.1595 |
| LQNGLQALLISDLSNMEGK                 | 2045.3             | 2            | 2.7537 | 0.1467 |
| LQNGQNGER                           | 1016.1             | 2            | 2.9923 | 0.2811 |
| LQNLDALTNLTVLSMQSNR                 | 2132.4             | 2            | 6.0197 | 0.5521 |
| LQNLEFALNLLR                        | 1444.7             | 2            | 4.0916 | 0.2967 |
| LQNLQLQPGNAK                        | 1324.5             | 2            | 4.2693 | 0.1945 |
| LQNLQLQPGNAKL                       | 1437.7             | 2            | 4.3584 | 0.2196 |
| LQNNNVYTIK                          | 1278.4             | 2            | 3.0529 | 0.3199 |
| LQNPDLSEALLALPLPQLVQK               | 2416.8             | 3            | 4.3012 | 0.2511 |
| LQPHEFQGGTFTISNLGMFGIK              | 2423.8             | 3            | 4.3049 | 0.3527 |
| LQPHPGLEKKEEEEEEEYDEGSNLKK          | 3215.4             | 3            | 4.1191 | 0.3156 |

| Peptide Sequence                           | Peptide mass (m/z) | Charge State | Xcorr  | DelCn2 |
|--------------------------------------------|--------------------|--------------|--------|--------|
| LQPSIIFIDEIDSFLR                           | 1907.2             | 2            | 4.1671 | 0.3373 |
| LQQEDGISFEYHR                              | 1622.7             | 2            | 3.7136 | 0.3407 |
| LQQEETQLEQSIQAGR                           | 1859.0             | 2            | 4.2763 | 0.3211 |
| LQQEGSENERIEELQEQLQK                       | 2558.7             | 3            | 6.4899 | 0.2305 |
| LQQELDDLLVDLDHQR                           | 1951.1             | 2            | 5.8838 | 0.3727 |
| LQQELDDLTVDLDHQR                           | 1939.1             | 2            | 5.1587 | 0.4351 |
| LQQELEFLEVQEEYIKDEQK                       | 2539.8             | 3            | 4.5618 | 0.226  |
| LQQENSILR                                  | 1101.2             | 2            | 2.7539 | 0.1148 |
| LQQENSILRDALNQATSQVESK                     | 2473.7             | 3            | 4.6582 | 0.4521 |
| LQQENSILRDALNQATSQVESKQNAELAK              | 3228.5             | 3            | 6.4874 | 0.4229 |
| LQQGYNAMGFSQGGQFLR                         | 2003.2             | 3            | 5.8488 | 0.5188 |
| LQQHIQELEAHLEAEEGAR                        | 2202.4             | 2            | 6.9499 | 0.457  |
| LQQHQSMPGTMAEAEDLDGGTLSR                   | 2573.8             | 2            | 3.8522 | 0.3734 |
| LQQLGEAHQAETEVLR                           | 1979.2             | 2            | 4.3912 | 0.3676 |
| LQQLKDETGEISSADEKR                         | 2048.2             | 3            | 4.3887 | 0.3123 |
| LQQLPADFGR                                 | 1145.3             | 2            | 2.8053 | 0.181  |
| LQQLSGSSAISSSDLFGDMDGAHGAGSVSLGNVLPADIAQFK | 4251.6             | 3            | 5.9198 | 0.5273 |
| LQQQHSEQPPLQSPVMTR                         | 2202.5             | 3            | 4.395  | 0.3357 |
| LQQQLTQAQETLK                              | 1529.7             | 2            | 4.7342 | 0.2619 |
| LQQQQAQQPLQQQQQR                           | 1979.1             | 3            | 3.9563 | 0.2826 |
| LQQTQAQVDEVVDIMR                           | 1874.1             | 2            | 5.5916 | 0.4762 |
| LQQTQNQVDEVVDIMR                           | 1917.1             | 2            | 5.0048 | 0.4789 |
| LQQTYAALNSK                                | 1237.4             | 2            | 3.3449 | 0.293  |
| LQREAIFYFELPELVR                           | 1893.1             | 2            | 3.2855 | 0.2845 |
| LQREAIFYFELPELVRR                          | 2049.3             | 3            | 3.6298 | 0.2802 |
| LQRELEDATETADAMNR                          | 1964.1             | 2            | 4.1873 | 0.4053 |
| LQRELEDATETADAMNREVSSLK                    | 2607.8             | 3            | 3.4193 | 0.2063 |
| LQRLEAEKQQLEALNASQEEEGSLAAAKR              | 3341.6             | 3            | 3.5925 | 0.3062 |
| LQRLEDELNR                                 | 1286.4             | 2            | 2.9565 | 0.1694 |
| LQRLEDELNRAK                               | 1485.7             | 3            | 3.6944 | 0.1446 |
| LQSESQKLEIR                                | 1331.5             | 2            | 2.9379 | 0.1302 |
| LQSHSSPEGKEEPEPLSPELEYIPR                  | 2850.1             | 3            | 5.9269 | 0.3948 |
| LQSIGTENTEENRR                             | 1647.7             | 2            | 3.0824 | 0.1632 |
| LQSLTENLTKEHLMLEELR                        | 2427.8             | 3            | 3.7774 | 0.2242 |
| LQSPEFQSLFTEGLK                            | 1724.9             | 2            | 4.1423 | 0.43   |
| LQSQMSGQQLVEQSHVVLSTLWEPHITQR              | 3361.8             | 3            | 5.242  | 0.4223 |

| Peptide Sequence                    | Peptide mass (m/z) | Charge State | Xcorr  | DelCn2 |
|-------------------------------------|--------------------|--------------|--------|--------|
| LQSQVLQAMR                          | 1174.4             | 2            | 3.0804 | 0.3178 |
| LQSQYASSEATISQLRSELAKGPQEVAVYVQELQK | 3881.3             | 3            | 3.6943 | 0.1991 |
| LQSRPAAPPAPGPGQLTLR                 | 1928.2             | 3            | 4.2711 | 0.4372 |
| LQSSDGEIFEVDVEIAK                   | 1880.0             | 2            | 4.3856 | 0.4182 |
| LQSSEAEVR                           | 1019.1             | 2            | 2.8449 | 0.2199 |
| LQSSQEPEAPPPRDVALLQGR               | 2289.5             | 3            | 3.5481 | 0.2051 |
| LQSVLGKVNEIAK                       | 1399.7             | 2            | 3.4123 | 0.2097 |
| LQSVQALTEIQEFISFISK                 | 2182.5             | 2            | 4.5303 | 0.433  |
| LQTEKQELLQK                         | 1358.6             | 2            | 3.7765 | 0.1611 |
| LQTEKQELLQKTEAFK                    | 2006.3             | 2            | 5.6048 | 0.4222 |
| LQTLVSEQPNKDVEQMEK                  | 2216.5             | 2            | 4.693  | 0.3193 |
| LQTMKEELDFQK                        | 1510.7             | 2            | 4.0219 | 0.3539 |
| LQTMKEELDFQKNIYSEELR                | 2515.8             | 3            | 3.2846 | 0.1894 |
| LQTMKEELDFQKNIYSEELRETK             | 2874.2             | 3            | 4.8751 | 0.3266 |
| LQTSSVLVSGLR                        | 1260.5             | 2            | 3.6015 | 0.2922 |
| LQTSSVLVSGLRGLGVEIAKNIILGGVK        | 2823.4             | 3            | 3.5097 | 0.2493 |
| LQTYKTAVETAVLLLR                    | 1820.2             | 2            | 2.9844 | 0.2981 |
| LQVEEVHQLSR                         | 1338.5             | 2            | 3.4889 | 0.1456 |
| LQVELDNVTGLLSQSDSK                  | 1947.1             | 2            | 6.8806 | 0.5034 |
| LQVELDNVTGLLSQSDSKSSK               | 2249.5             | 2            | 5.4995 | 0.3941 |
| LQVEQAPHSSPGAK                      | 1449.6             | 2            | 4.2099 | 0.4431 |
| LQVKEHQHEEIQNVR                     | 1888.1             | 2            | 2.4155 | 0.1577 |
| LQVSQQEDITK                         | 1289.4             | 2            | 3.7341 | 0.2962 |
| LQVTNVLSQPLTQATVK                   | 1841.1             | 2            | 5.8911 | 0.5255 |
| LQVTNVLSQPLTQATVKLEHAK              | 2419.8             | 2            | 4.8986 | 0.3813 |
| LQVVDQPLPVR                         | 1264.5             | 2            | 3.1932 | 0.3368 |
| LQYLIDLGRVDPSQPIDLTQLVNGR           | 2825.2             | 3            | 6.1452 | 0.3679 |
| LRAELDEVNKSAAK                      | 1473.7             | 2            | 3.8576 | 0.3383 |
| LRAETEQQEQQR                        | 1445.5             | 2            | 4.644  | 0.3408 |
| LRAETEQQEQQRQLLEEELAR               | 2527.7             | 3            | 5.2594 | 0.276  |
| LRAPDLEYLFEKPR                      | 1748.0             | 3            | 4.6205 | 0.3155 |
| LRAPGALLAAAGLADAATEIVER             | 2250.6             | 3            | 4.294  | 0.2757 |
| LRAPPNATLEHFYLTSGK                  | 2016.3             | 3            | 5.3079 | 0.4544 |
| LRAPPNATLEHFYLTSGKQPK               | 2369.7             | 3            | 6.1882 | 0.495  |
| LRAVDFAER                           | 1077.2             | 2            | 3.5214 | 0.2502 |
| LRDDTEAAIR                          | 1160.3             | 2            | 3.3024 | 0.1136 |

| Peptide Sequence            | Peptide mass (m/z) | Charge State | Xcorr  | DelCn2 |
|-----------------------------|--------------------|--------------|--------|--------|
| LRDFLLEHR                   | 1199.4             | 2            | 2.441  | 0.14   |
| LRDHDDAAESLIEQTALNKR        | 2397.6             | 3            | 5.5716 | 0.3499 |
| LRDLEDSLAR                  | 1188.3             | 2            | 3.4356 | 0.2547 |
| LRDLHPDLEGQLK               | 1534.7             | 2            | 4.3638 | 0.3887 |
| LRDLHPDLEGQLKELR            | 1933.2             | 3            | 4.9804 | 0.3049 |
| LRDNGLLAKPTHGDIIR           | 1890.2             | 3            | 4.99   | 0.4225 |
| LRDPEVVASELGYVFQAITLTR      | 2478.8             | 3            | 4.5705 | 0.3841 |
| LRDPLQVHLPLR                | 1457.7             | 3            | 3.3833 | 0.2369 |
| LRDTEEMLSCKQEFLEK           | 2125.4             | 3            | 3.2529 | 0.1512 |
| LRDVAALNGLYR                | 1361.6             | 2            | 3.101  | 0.3289 |
| LREAAEGLR                   | 1015.1             | 2            | 2.6671 | 0.1584 |
| LREAGLAPVPMIIFAK            | 1727.2             | 2            | 3.2499 | 0.3486 |
| LREAGLVAQHPPAR              | 1515.7             | 2            | 3.5163 | 0.3043 |
| LREANQQQQFNR                | 1532.6             | 2            | 2.8682 | 0.1652 |
| LREAQNDLEQVLR               | 1584.8             | 2            | 4.2159 | 0.1987 |
| LRECLPLIIFLR                | 1486.9             | 2            | 3.4032 | 0.2871 |
| LREDENAEPVGTTYQK            | 1851.0             | 2            | 5.5731 | 0.462  |
| LREDGIQKR                   | 1115.3             | 2            | 2.8721 | 0.1189 |
| LREEEQQQR                   | 1353.4             | 2            | 3.1207 | 0.2463 |
| LREEEVDADAADAAAAEEEDGEFLGMK | 2883.0             | 3            | 4.1233 | 0.3312 |
| LREEFSFIPSAALDLLDHMLTLDPSKR | 3116.6             | 3            | 3.4861 | 0.2661 |
| LREEIEELKR                  | 1315.5             | 2            | 3.7247 | 0.1258 |
| LREELKPIAFAR                | 1443.7             | 2            | 3.1935 | 0.2123 |
| LREENKQFKEEDGLR             | 1892.1             | 2            | 4.9134 | 0.3374 |
| LREFASHLQQLQDALNELTEEHSK    | 2838.1             | 3            | 4.4846 | 0.269  |
| LREFQESFKNIEK               | 1668.9             | 3            | 3.3936 | 0.1529 |
| LREKLQEEMLQREEAENTLQSFR     | 2879.2             | 3            | 3.7832 | 0.3194 |
| LRELNKEMAAEK                | 1432.7             | 2            | 3.6951 | 0.2998 |
| LRELPLAADALTFAEVSKDPK       | 2285.6             | 3            | 3.7371 | 0.2291 |
| LREMFGLYGQTTGK              | 1601.9             | 2            | 2.5264 | 0.1151 |
| LRENELTYYCCK                | 1535.8             | 2            | 3.3027 | 0.2138 |
| LRENELTYYCCKK               | 1663.9             | 2            | 2.6294 | 0.1976 |
| LRENKEFLEFR                 | 1481.7             | 3            | 4.1541 | 0.3183 |
| LRENVFQEHQTLK               | 1642.8             | 2            | 3.941  | 0.305  |
| LRENVFQEHQTLKEKELETGPK      | 2655.0             | 3            | 6.3398 | 0.4768 |
| LREQEKEEKER                 | 1474.6             | 2            | 3.819  | 0.1437 |

| Peptide Sequence                     | Peptide mass (m/z) | Charge State | Xcorr  | DelCn2 |
|--------------------------------------|--------------------|--------------|--------|--------|
| LREQGTESR                            | 1076.1             | 2            | 2.6526 | 0.1077 |
| LREQLQLLEEQR                         | 1692.9             | 3            | 4.1686 | 0.2444 |
| LREQTLSPTITSLHNIAR                   | 2108.4             | 3            | 5.8861 | 0.4565 |
| LRETAEADVASLNR                       | 1545.7             | 2            | 4.014  | 0.2596 |
| LREVVETPLLHPER                       | 1689.0             | 3            | 4.5713 | 0.3767 |
| LREYEAALNSK                          | 1294.4             | 2            | 3.4305 | 0.1164 |
| LREYEAALNSKDAALATALGDKK              | 2449.7             | 3            | 6.0446 | 0.4194 |
| LRFDKEGEVR                           | 1249.4             | 2            | 2.4142 | 0.1081 |
| LRFPAEDEFDPDLSAHNNHMAK               | 2440.7             | 3            | 6.0006 | 0.381  |
| LRGGSPLNTGK                          | 1100.3             | 2            | 2.9464 | 0.2296 |
| LRGHGAEGPQEPK                        | 1376.5             | 2            | 2.4539 | 0.1655 |
| LRGIEQAVQSHAVAESEAR                  | 2094.3             | 2            | 6.1009 | 0.5035 |
| LRGIEQAVQSHAVAESEARK                 | 2222.4             | 3            | 5.1817 | 0.424  |
| LRGLPFGCTKEEIVQFFSGLEIVPNGITLPVDPEGK | 3902.5             | 3            | 3.4295 | 0.1229 |
| LRGTADVTHDLQEMKEESR                  | 2216.4             | 3            | 3.8642 | 0.2059 |
| LRGWEAFLNAPEANR                      | 1744.9             | 2            | 3.6927 | 0.3835 |
| LRGYDYGPHFQGILEASLEGDSGR             | 2638.8             | 3            | 4.0815 | 0.3505 |
| LRHADLEIR                            | 1123.3             | 2            | 2.8282 | 0.1742 |
| LRHEILLSQSVR                         | 1451.7             | 2            | 4.0736 | 0.334  |
| LRHPLGEAYATK                         | 1356.6             | 2            | 3.4786 | 0.3652 |
| LRIDYER                              | 965.1              | 2            | 2.6311 | 0.126  |
| LRITSEEEVVS                          | 1418.6             | 2            | 2.7173 | 0.2468 |
| LRKDDPLTNLNTAFDVAEK                  | 2161.4             | 3            | 4.944  | 0.466  |
| LRKDDPLTNLNTAFDVAEKYLDIPK            | 2891.3             | 3            | 6.1113 | 0.5708 |
| LRKDDPVTNLNNAFEVAEK                  | 2174.4             | 3            | 4.5557 | 0.3581 |
| LRKDDPVTNLNNAFEVAEKYLDIPK            | 2904.3             | 3            | 3.9734 | 0.2717 |
| LRKELEAQLDDAVAEASKER                 | 2272.5             | 3            | 4.4905 | 0.1768 |
| LRKNYVEDIPFLSPTFNPQEVFIR             | 2924.3             | 3            | 3.6587 | 0.1257 |
| LRLDQPKLDEVTR                        | 1583.8             | 2            | 3.5093 | 0.2568 |
| LRLDTGPQSLSGK                        | 1372.6             | 2            | 3.3497 | 0.3187 |
| LRLEEEQKEEER                         | 1717.8             | 2            | 5.0349 | 0.289  |
| LRLEHEQASQPTPEK                      | 1763.9             | 2            | 3.6305 | 0.2977 |
| LRLEHEQASQPTPEKAQQNPSTLLAELR         | 3099.4             | 3            | 6.8073 | 0.5126 |
| LRLESEGSPETLTNLRK                    | 1944.2             | 3            | 4.8176 | 0.2956 |
| LRLEVNLAQAMK                         | 1315.6             | 2            | 2.7858 | 0.2075 |
| LRLPLDKEPAR                          | 1308.6             | 3            | 3.4892 | 0.1304 |



| Peptide Sequence                | Peptide mass (m/z) | Charge State | Xcorr  | DelCn2 |
|---------------------------------|--------------------|--------------|--------|--------|
| LRLSEELSGGR                     | 1217.4             | 2            | 2.538  | 0.1695 |
| LRNELQTDKPFIFLVEK               | 2041.4             | 3            | 4.159  | 0.3142 |
| LRNEYGPVLMHPTSK                 | 1743.0             | 3            | 3.7    | 0.2821 |
| LRNGHVGISFVPK                   | 1424.7             | 3            | 3.2532 | 0.1972 |
| LRNILSVVGTDALKK                 | 1628.0             | 2            | 2.633  | 0.1312 |
| LRNVSNLKPVPLIGPK                | 1746.1             | 2            | 3.1117 | 0.2799 |
| LRNWASGHDLQ GK                  | 1482.6             | 2            | 3.4144 | 0.2357 |
| LRPEAQPHPSAGPK                  | 1485.7             | 2            | 3.0913 | 0.2224 |
| LRPEAQPHPSAGPKPAESK             | 1998.2             | 2            | 3.8923 | 0.3407 |
| LRPESALAAQAK                    | 1312.5             | 2            | 3.2842 | 0.1767 |
| LRPGSIETYEQEK                   | 1550.7             | 2            | 3.4447 | 0.2655 |
| LRPLSYPQTDVFLVCFVSVVSPSSFENVKEK | 3417.9             | 3            | 4.1342 | 0.2847 |
| LRPLYDIPYMFEAR                  | 1785.1             | 2            | 4.1653 | 0.3386 |
| LRPLYNHHPAGPR                   | 1391.6             | 2            | 2.7789 | 0.1272 |
| LRPQTYDLQESNVQLK                | 1933.2             | 3            | 4.7209 | 0.2313 |
| LRPSPGSLLDTIEDLGDDPALSRLR       | 2551.8             | 3            | 4.0799 | 0.3074 |
| LRPYFEGLSHSSSQTEIGSIHSAR        | 2660.9             | 3            | 4.8542 | 0.326  |
| LRQEEPQSLQA AVR                 | 1625.8             | 2            | 4.5845 | 0.2305 |
| LRQEFAQHANA FHWIQETR            | 2511.7             | 3            | 3.7578 | 0.2987 |
| LRQEIYSSHNQPSTGGR               | 1931.1             | 3            | 3.6527 | 0.2948 |
| LRQENMELAER                     | 1389.6             | 2            | 3.515  | 0.2453 |
| LRQLAEEDLAQQR                   | 1570.7             | 2            | 4.4152 | 0.2992 |
| LRQNLDALLNQLK                   | 1539.8             | 2            | 3.2322 | 0.2848 |
| LRQPFQKR                        | 1220.5             | 2            | 2.4402 | 0.1131 |
| LRRPEGASNESERD                  | 1616.7             | 3            | 3.664  | 0.2417 |
| LRSDIAVPIPKDHQVLIK              | 2043.4             | 2            | 3.9522 | 0.3248 |
| LRSELDVVR                       | 1087.3             | 2            | 2.8257 | 0.1929 |
| LRSELEMVSGNVR                   | 1490.7             | 2            | 4.1831 | 0.3221 |
| LRSENKD IENLRR                  | 1643.8             | 2            | 4.0845 | 0.26   |
| LRSGGTEGLLA EKLEALITQTR         | 2357.7             | 3            | 5.7181 | 0.412  |
| LRSLLESLHSFVAAATK               | 1731.0             | 2            | 3.4013 | 0.2543 |
| LRSPPEALVQGR                    | 1323.5             | 2            | 3.2551 | 0.2919 |
| LRVAPEEHPVLLTEAPLNPK            | 2224.6             | 3            | 4.9889 | 0.1709 |
| LRVCEVCSAYLGLHDNDRR             | 2220.5             | 3            | 3.2544 | 0.1393 |
| LRVDKAAAAAALQAK                 | 1568.8             | 3            | 3.2203 | 0.2549 |
| LRVDQLKYDVQHLQTALR              | 2197.5             | 3            | 4.4907 | 0.333  |

| Peptide Sequence                    | Peptide mass (m/z) | Charge State | Xcorr  | DelCn2 |
|-------------------------------------|--------------------|--------------|--------|--------|
| LRVDYSGGFEPFSVLR                    | 1843.1             | 2            | 2.6296 | 0.1158 |
| LRVHLPSSIYR                         | 1341.6             | 2            | 2.5241 | 0.1703 |
| LSAADEKAVSAAEEVK                    | 1618.8             | 2            | 3.6184 | 0.3176 |
| LSAAVTEAFVR                         | 1164.3             | 2            | 3.3051 | 0.1812 |
| LSAEAEKVLALPEPSPAAPTLRSELELTGKLEQVR | 3858.4             | 3            | 3.879  | 0.2551 |
| LSAEDLVLEGAGLR                      | 1443.6             | 2            | 4.4908 | 0.3649 |
| LSAEAAHR                            | 984.0              | 2            | 2.73   | 0.1672 |
| LSAEERDQLLPNLR                      | 1654.8             | 3            | 4.1752 | 0.188  |
| LSAEKVEIATLTR                       | 1431.7             | 2            | 3.6765 | 0.2934 |
| LSAIAGSSGNKHPSR                     | 1482.6             | 2            | 2.7364 | 0.2408 |
| LSAIYGGTYMLNKPIEEIIVQNGK            | 2653.1             | 3            | 6.3952 | 0.4724 |
| LSAIYGGTYMLNKPIEEIIVQNGKVGK         | 3149.7             | 3            | 4.8342 | 0.2921 |
| LSAIYGGTYMLNKPVDDIIMENGK            | 2644.1             | 3            | 5.1351 | 0.4623 |
| LSAIYGGTYMLNKPVDDIIMENGKVVGVK       | 3126.7             | 3            | 4.2957 | 0.3805 |
| LSAKEDSIHILNEEYETK                  | 2120.3             | 3            | 3.6808 | 0.3548 |
| LSAKPAPPKPEPK                       | 1360.6             | 2            | 3.8534 | 0.1926 |
| LSAKPAPPKPEPR                       | 1388.6             | 3            | 4.2005 | 0.2838 |
| LSAKPAPPKPEPRPK                     | 1613.9             | 2            | 2.9655 | 0.1077 |
| LSAKPPAKVEAK                        | 1239.5             | 2            | 2.6043 | 0.1303 |
| LSAKPPAKVEAKPK                      | 1464.8             | 3            | 3.8649 | 0.1676 |
| LSAKPPAKVEVKPK                      | 1492.8             | 2            | 2.9001 | 0.183  |
| LSALLQETK                           | 1003.2             | 2            | 2.8889 | 0.1053 |
| LSALLQETKELKNEIK                    | 1858.2             | 3            | 3.7645 | 0.2104 |
| LSAMLVPVTPEVKPK                     | 1610.0             | 2            | 3.252  | 0.2437 |
| LSASLLHSHDTETR                      | 1567.7             | 2            | 3.5099 | 0.4007 |
| LSASSISSADLFEEPR                    | 1796.9             | 2            | 4.3035 | 0.3352 |
| LSASSTGSTR                          | 967.0              | 2            | 2.6945 | 0.2212 |
| LSATLGGLLQDHGSR                     | 1525.7             | 2            | 3.9898 | 0.394  |
| LSDAGITPLFLTR                       | 1404.6             | 2            | 4.3296 | 0.359  |
| LSDALAVEDDQVAPVPLNVVETSSSVR         | 2812.1             | 3            | 3.8406 | 0.2786 |
| LSDDNTIGKEEIQQR                     | 1746.9             | 3            | 4.1844 | 0.2725 |
| LSDEHEPEQR                          | 1240.3             | 2            | 2.9739 | 0.2274 |
| LSDETLIDIMTR                        | 1407.6             | 2            | 4.3428 | 0.325  |
| LSDGFNGADLR                         | 1165.2             | 2            | 3.7348 | 0.2686 |
| LSDGVAVLK                           | 902.1              | 2            | 3.5435 | 0.2138 |
| LSDKGLKAELMER                       | 1490.8             | 3            | 3.3802 | 0.2888 |

| Peptide Sequence                   | Peptide mass (m/z) | Charge State | Xcorr  | DelCn2 |
|------------------------------------|--------------------|--------------|--------|--------|
| LSDLLAPISEQIK                      | 1427.7             | 2            | 4.0897 | 0.275  |
| LSDLLAPISEQIKEVITFR                | 2173.5             | 3            | 4.1607 | 0.4407 |
| LSDLQEALDQALNYVR                   | 1849.0             | 2            | 2.8149 | 0.3331 |
| LSDLQKEAEKLESEHPDQAQAILSR          | 2837.1             | 3            | 5.8771 | 0.4561 |
| LSDPGIPITVLSR                      | 1368.6             | 2            | 2.5466 | 0.1311 |
| LSDQFHDILIR                        | 1357.5             | 2            | 3.2606 | 0.1755 |
| LSDSFSLYPQFMFHLR                   | 1989.3             | 3            | 4.1331 | 0.248  |
| LSDSTLKETLLNGVGYLHEGLSPMER         | 2861.2             | 3            | 4.9084 | 0.4421 |
| LSDVDANTAIKHEEQSNEDIPIAEQSSK       | 3070.2             | 3            | 4.5476 | 0.3763 |
| LSDVDRDGMLDDEEFALASHLIEAK          | 2791.0             | 3            | 3.579  | 0.2921 |
| LSDVTLVPVSCSELEKAGAGLSSLCLVLSTRPHS | 3471.0             | 3            | 3.5836 | 0.1987 |
| LSDYLFTLAR                         | 1199.4             | 2            | 4.0749 | 0.32   |
| LSEDSLTKQPEEVFDVLEKLGEGSYGSVFK     | 3332.7             | 3            | 4.1027 | 0.1043 |
| LSEDYGVLK                          | 1024.1             | 1            | 1.7069 | 0.1444 |
| LSEDYGVLKTDEGIAYR                  | 1930.1             | 2            | 5.0382 | 0.4968 |
| LSEEEILENPDFLFTSEATDYGR            | 2642.8             | 2            | 5.7595 | 0.3821 |
| LSEEEELDKLEIFFGK                   | 1911.2             | 2            | 4.4885 | 0.4336 |
| LSEEFLLTAHPR                       | 1300.4             | 2            | 2.5934 | 0.3046 |
| LSEELSGGR                          | 948.0              | 2            | 3.31   | 0.1881 |
| LSEGEAKEDSLDEEFFHHK                | 2248.3             | 3            | 3.6759 | 0.1207 |
| LSEGSQPAEEEEEDQETPSR               | 2119.1             | 2            | 4.0675 | 0.4269 |
| LSEHATAPTR                         | 1083.2             | 2            | 2.7821 | 0.3675 |
| LSEHPDIR                           | 967.1              | 2            | 2.4351 | 0.1575 |
| LSEHSSPEEEASPHQR                   | 1820.9             | 3            | 6.1775 | 0.4269 |
| LSEIDVSSEGVK                       | 1263.4             | 2            | 3.5272 | 0.2575 |
| LSEIHHLHPEYVR                      | 1630.8             | 3            | 3.9895 | 0.3551 |
| LSEIMEKGQLVPLETVLDMLRDAMVAK        | 3031.6             | 3            | 4.8706 | 0.255  |
| LSEIVTLAK                          | 974.2              | 2            | 3.0839 | 0.1675 |
| LSEKHSQNGFIVPPPPEK                 | 2005.3             | 2            | 3.9336 | 0.3786 |
| LSELDDRADALQAGASQFETSAK            | 2495.6             | 3            | 5.2807 | 0.2974 |
| LSELEAALQR                         | 1130.3             | 2            | 4.4052 | 0.2525 |
| LSELEFHNSK                         | 1204.3             | 2            | 3.1016 | 0.1155 |
| LSELLPEEVEAEVK                     | 1585.8             | 2            | 3.4235 | 0.1743 |
| LSELQETSEQAQSK                     | 1578.7             | 2            | 3.4474 | 0.2429 |
| LSEMTEAEQQQLIDDHFLFDKPVSPLLTAAGMAR | 3804.3             | 3            | 7.0285 | 0.4925 |
| LSENNIQTIFAVTEEFQPVYK              | 2471.7             | 3            | 4.3143 | 0.3678 |

| Peptide Sequence                       | Peptide mass (m/z) | Charge State | Xcorr  | DelCn2 |
|----------------------------------------|--------------------|--------------|--------|--------|
| LSENNIQTIFAVTEEFQPVYKELK               | 2842.2             | 3            | 4.1675 | 0.2753 |
| LSENVDR                                | 946.0              | 2            | 3.0066 | 0.1306 |
| LSENVVNR                               | 931.0              | 2            | 2.7898 | 0.1456 |
| LSEPKPIFFNLNIAAAKPTPPK                 | 2394.8             | 3            | 5.1838 | 0.3886 |
| LSESQLSFR                              | 1067.2             | 2            | 2.7274 | 0.1939 |
| LSESQLSFRRSPTK                         | 1636.8             | 2            | 2.4096 | 0.1254 |
| LSETSIKDR                              | 1049.2             | 2            | 2.4921 | 0.1019 |
| LSEVVGSGKDGR                           | 1204.3             | 2            | 2.6957 | 0.2398 |
| LSFAHPPSAEVEAIALATLHDR                 | 2346.6             | 3            | 5.2855 | 0.2781 |
| LSFDKAMVAR                             | 1253.5             | 2            | 3.659  | 0.3599 |
| LSFEDFVTMTASR                          | 1504.7             | 2            | 4.266  | 0.4211 |
| LSFGDTLQVQNIHGAFNALGGADR               | 2502.7             | 3            | 4.461  | 0.3397 |
| LSFGDTLQVQNIHGAFNALGGADRLTSNPLASHDYILK | 4056.5             | 3            | 5.5756 | 0.4064 |
| LSFGLLEDEPLETATK                       | 1650.8             | 2            | 2.7999 | 0.1721 |
| LSFLKEPK                               | 962.2              | 2            | 2.4312 | 0.1363 |
| LSFLYLITGNLEK                          | 1511.8             | 2            | 3.2856 | 0.2312 |
| LSFQHDPETSVLVLR                        | 1742.0             | 3            | 5.2087 | 0.3853 |
| LSFSGLRAPVPASELLASGVLSR                | 2328.7             | 3            | 4.5436 | 0.3473 |
| LSGAEPDDEEYQEFEEMLEHAESAQDFASR         | 3461.5             | 3            | 4.2967 | 0.2699 |
| LSGAPQASAADVHVHGR                      | 1734.9             | 2            | 4.8985 | 0.4133 |
| LSGAQADLHIEDGDSIR                      | 1797.9             | 2            | 4.8417 | 0.4352 |
| LSGDVGER                               | 832.9              | 2            | 2.4003 | 0.1055 |
| LSGGDDDAAGQFFPEAAQVAYQMWELSAVAR        | 3302.6             | 3            | 6.5641 | 0.4863 |
| LSGGGDWHIAYVLLYGPR                     | 1975.2             | 2            | 3.7028 | 0.1682 |
| LSGGIDFNQPLVITR                        | 1630.9             | 2            | 4.0426 | 0.3812 |
| LSGLADQMVAR                            | 1161.4             | 2            | 3.6758 | 0.318  |
| LSGLNAFDIAEELVK                        | 1619.8             | 2            | 4.2328 | 0.2615 |
| LSGPLKEQYAEHGLNFQR                     | 2216.4             | 2            | 5.6698 | 0.4601 |
| LSGSARPELVGTFTIQQEVGKPEDEASGSFFK       | 3440.8             | 3            | 5.1686 | 0.3361 |
| LSGSNPYTTVTPQIINSK                     | 1921.1             | 2            | 5.5628 | 0.4512 |
| LSGTEAHVLGLVNHAVAQNEEGDAAYQR           | 2951.2             | 3            | 5.3814 | 0.4147 |
| LSGTGSAGATIR                           | 1091.2             | 2            | 3.381  | 0.3706 |
| LSGTVGVAAVTAGPGLTNTVTAVK               | 2185.5             | 3            | 4.7684 | 0.3056 |
| LSGVQYQQHSQALGK                        | 1644.8             | 2            | 3.5108 | 0.257  |
| LSHANSVVLSAVK                          | 1396.6             | 2            | 3.6473 | 0.3456 |
| LSHEGPGSELPAALYR                       | 1754.9             | 2            | 4.6069 | 0.4734 |

| Peptide Sequence            | Peptide mass (m/z) | Charge State | Xcorr  | DelCn2 |
|-----------------------------|--------------------|--------------|--------|--------|
| LSHEGPGSELPAALYRK           | 1883.1             | 2            | 4.8427 | 0.4    |
| LSHHTSALSVVSSAVPK           | 1721.0             | 2            | 3.9233 | 0.382  |
| LSHLKPSSEGLAIVTK            | 1681.0             | 2            | 3.5777 | 0.3682 |
| LSHNGIFTLYSYRDPNTIETLQSFQK  | 3003.3             | 3            | 5.8089 | 0.4244 |
| LSHSMSPDAQDGH               | 1382.4             | 2            | 3.8434 | 0.3748 |
| LSIAEVVHQLQEIAAAR           | 1849.1             | 3            | 4.9215 | 0.4146 |
| LSIIATDHTYR                 | 1290.5             | 2            | 2.8756 | 0.2978 |
| LSILYPATTGR                 | 1192.4             | 2            | 2.9872 | 0.2709 |
| LSINTHPSQKPLSITVR           | 1892.2             | 3            | 3.5904 | 0.2646 |
| LSIRKEGDGEAK                | 1303.4             | 2            | 2.756  | 0.1215 |
| LSITGTYDLK                  | 1111.3             | 2            | 3.0698 | 0.2612 |
| LSIVPVRR                    | 940.2              | 2            | 2.5119 | 0.1625 |
| LSKADVER                    | 918.0              | 1            | 1.9189 | 0.1479 |
| LSKAEQDITTLEQSISRLEGQVLR    | 2716.0             | 3            | 4.0515 | 0.3027 |
| LSKDDIDR                    | 962.0              | 2            | 2.8571 | 0.125  |
| LSKDKDLEIDELQKR             | 1831.1             | 3            | 3.3419 | 0.1801 |
| LSKDPNIVIAK                 | 1198.4             | 3            | 4.4722 | 0.2833 |
| LSKEDIER                    | 990.1              | 2            | 2.7251 | 0.1014 |
| LSKEETVLATVQALQTASHLSQQADLR | 2939.3             | 3            | 6.669  | 0.5107 |
| LSKELDLVSHHVR               | 1533.8             | 3            | 4.5462 | 0.4172 |
| LSKELGIETYK                 | 1281.5             | 2            | 2.7972 | 0.187  |
| LSKELGIETYKVVNSER           | 1966.2             | 2            | 4.2288 | 0.2182 |
| LSKELSSTEAQLHDAQELLQEETRAK  | 2956.2             | 3            | 4.8528 | 0.3227 |
| LSKEYDQLLKEHSELQDRLER       | 2630.9             | 3            | 4.3684 | 0.2825 |
| LSKLEPEPNTK                 | 1256.4             | 2            | 3.8494 | 0.1092 |
| LSKNGADSEALHVLAFQLQELNEK    | 2527.8             | 3            | 5.2089 | 0.354  |
| LSLDELHRK                   | 1111.3             | 2            | 2.5956 | 0.1677 |
| LSLDKVFR                    | 978.2              | 2            | 2.715  | 0.1226 |
| LSLEEFIR                    | 1007.2             | 2            | 2.6664 | 0.1125 |
| LSLEFGDPASSLFR              | 1539.7             | 2            | 3.6705 | 0.3993 |
| LSLEGDHSTPPSAYGSVK          | 1846.0             | 2            | 5.3907 | 0.5169 |
| LSLESEGAGEGAAASPELSALEEAFRR | 2748.9             | 3            | 4.0005 | 0.2467 |
| LSLNIDPDAK                  | 1086.2             | 2            | 2.9654 | 0.1626 |
| LSLPQNETVADTTLTK            | 1731.9             | 2            | 3.722  | 0.4204 |
| LSLQDAVSQGVIDQDMATR         | 2048.3             | 2            | 3.3021 | 0.2102 |
| LSLSNAISTALPLTQLR           | 1799.1             | 2            | 4.3071 | 0.3858 |

| Peptide Sequence                 | Peptide mass (m/z) | Charge State | Xcorr  | DelCn2 |
|----------------------------------|--------------------|--------------|--------|--------|
| LSLTQSDISHIGSMR                  | 1645.9             | 2            | 4.15   | 0.4904 |
| LSMKEGDPAIYAER                   | 1580.8             | 2            | 3.5266 | 0.2912 |
| LSMKPEPLFR                       | 1218.5             | 2            | 2.4224 | 0.1437 |
| LSMYGVDLHHAK                     | 1371.6             | 2            | 2.59   | 0.2173 |
| LSNHISLFR                        | 1174.3             | 2            | 2.8415 | 0.3011 |
| LSNHVFNALK                       | 1143.3             | 2            | 2.5827 | 0.2828 |
| LSNIFVIGK                        | 991.2              | 2            | 3.5485 | 0.219  |
| LSNLALVKPEK                      | 1212.5             | 2            | 2.6422 | 0.1134 |
| LSNRPAFMPSEGK                    | 1434.6             | 2            | 3.5071 | 0.2524 |
| LSNRPAFMPSEGR                    | 1462.7             | 2            | 3.4867 | 0.3637 |
| LSNSDSQDIQGR                     | 1320.3             | 2            | 3.8816 | 0.291  |
| LSNTGEYESQR                      | 1284.3             | 2            | 3.6355 | 0.2989 |
| LSNTQGVVSAFSTMMSVHR              | 2053.4             | 2            | 3.9862 | 0.4173 |
| LSNTSPEFQEMSLER                  | 1882.1             | 2            | 4.7289 | 0.3569 |
| LSNVSSSGSINLLESPQLATLAEDVTAALAK  | 3101.5             | 3            | 4.2349 | 0.3937 |
| LSPDAVAQLAFQMAFLR                | 1879.2             | 3            | 4.8371 | 0.42   |
| LSPEDYTLKVSQAGK                  | 1636.8             | 2            | 4.5542 | 0.3853 |
| LSPEIVELSEPLQVVR                 | 1809.1             | 2            | 3.8495 | 0.3134 |
| LSPEPWTPETGLVTDAFK               | 1989.2             | 2            | 4.0907 | 0.4139 |
| LSPFMADIR                        | 1050.3             | 2            | 2.6436 | 0.1717 |
| LSPFMADIRDAPQDFHPDRVK            | 2456.8             | 3            | 3.9784 | 0.3339 |
| LSPGGYFIGTTPNSFELIR              | 2070.3             | 2            | 3.7753 | 0.3259 |
| LSPISHGNTIALFFR                  | 1673.9             | 2            | 3.6742 | 0.4759 |
| LSPKAEVATFFAK                    | 1538.8             | 2            | 3.3218 | 0.29   |
| LSPKHPESENTAGMDIFAK              | 1944.2             | 2            | 3.1441 | 0.3186 |
| LSPLVLEVDPNIQAVR                 | 1764.1             | 2            | 5.0965 | 0.445  |
| LSPNYVVCRDCEVTNDGHTIQVILK        | 2818.2             | 3            | 4.3449 | 0.1229 |
| LSPPPSQSDQLLAESSSARPQLELHLPQAAR  | 3481.9             | 3            | 3.3547 | 0.3352 |
| LSPPPSSAASSYSFSDLNSTR            | 2162.3             | 2            | 3.0246 | 0.2896 |
| LSPPYSSPQEFAQDVGR                | 1879.0             | 2            | 3.5203 | 0.3449 |
| LSPQAVNSIAKR                     | 1284.5             | 2            | 2.8186 | 0.2589 |
| LSPQFPNEEDSFHKFVAPEEVLPFTEGDILEK | 3691.1             | 3            | 5.1482 | 0.2626 |
| LSQALGNVTVVQK                    | 1357.6             | 2            | 3.5011 | 0.2277 |
| LSQELEYLTEDVKR                   | 1723.9             | 2            | 3.8404 | 0.2975 |
| LSQEQVDNFTLDINTAYAR              | 2199.4             | 2            | 5.7953 | 0.471  |
| LSQETEALGR                       | 1104.2             | 2            | 3.8799 | 0.1694 |

| Peptide Sequence                     | Peptide mass (m/z) | Charge State | Xcorr  | DelCn2 |
|--------------------------------------|--------------------|--------------|--------|--------|
| LSQLEGVNVER                          | 1244.4             | 2            | 3.3484 | 0.1463 |
| LSQNNFALGYK                          | 1255.4             | 2            | 3.4472 | 0.2809 |
| LSQPAGGLLDSITNIFGR                   | 1860.1             | 2            | 2.4402 | 0.1183 |
| LSQRFPK                              | 876.0              | 2            | 2.4433 | 0.1225 |
| LSQVLRDLEDESTPIVK                    | 1943.2             | 2            | 3.316  | 0.2063 |
| LSQVSDSVSGQTVVDPK                    | 1746.9             | 3            | 3.3062 | 0.2058 |
| LSQYPNENLHSAVTK                      | 1701.9             | 2            | 2.6776 | 0.1346 |
| LSQYQEPLHLPQVGR                      | 1637.9             | 2            | 3.0158 | 0.2701 |
| LSRFDNDRTISFIPPDGDFELMSYR            | 2993.3             | 3            | 3.4467 | 0.1125 |
| LSRTNEELLWKLQTDPTSPIK                | 2527.9             | 2            | 2.5769 | 0.1445 |
| LSSAHNGGSFAFGAAGYGGAQPTPPMPTRPVSFHER | 3511.8             | 3            | 4.0077 | 0.2615 |
| LSSANGHEER                           | 1100.1             | 2            | 3.0702 | 0.2533 |
| LSSARPGGLGSSSLYGLGASRPR              | 2247.5             | 3            | 4.9127 | 0.3418 |
| LSSDQNDKAASAAR                       | 1434.5             | 2            | 3.8107 | 0.2367 |
| LSSDQNDKAASAAREELKEAR                | 2290.4             | 3            | 3.4666 | 0.2115 |
| LSSDVLTLLIK                          | 1202.5             | 2            | 3.5918 | 0.2555 |
| LSSDKETMEK                           | 1297.4             | 2            | 2.7809 | 0.2377 |
| LSSEMNTSTVNSAR                       | 1497.6             | 2            | 4.3473 | 0.4618 |
| LSSEMNTSTVNSAREELMESR                | 2372.6             | 2            | 3.7722 | 0.2939 |
| LSSEQFHEAASK                         | 1334.4             | 2            | 3.5094 | 0.3654 |
| LSSEQFHEAASKMESTIKPR                 | 2277.5             | 3            | 5.3189 | 0.3555 |
| LSSSETGGMGSS                         | 1013.1             | 1            | 1.9502 | 0.1222 |
| LSSGPEQITLSEASSTEGHPGAPSPQHTDQTEAFQK | 3664.8             | 3            | 5.4217 | 0.4807 |
| LSSLDNLKASVSQVEADLK                  | 2018.3             | 3            | 5.1835 | 0.3585 |
| LSSLFPFALLQR                         | 1392.7             | 2            | 2.9609 | 0.2062 |
| LSSLIILMPHHVEPLER                    | 1985.4             | 2            | 4.7174 | 0.2368 |
| LSSLPVGPSFLGFR                       | 1477.7             | 2            | 2.6863 | 0.2717 |
| LSSPAVINSR                           | 1044.2             | 2            | 2.6837 | 0.2108 |
| LSSPERDVERDVFLYR                     | 1982.2             | 2            | 2.7993 | 0.1318 |
| LSSQIEKLEHEISHLK                     | 1892.1             | 2            | 4.6006 | 0.3586 |
| LSSQIEKLEHEISHLKK                    | 2020.3             | 3            | 4.5299 | 0.3653 |
| LSSTQQSLAEKETHLTNLRAER               | 2513.7             | 3            | 3.6603 | 0.2527 |
| LSSVQQILQLSDLWR                      | 1787.1             | 2            | 2.8144 | 0.218  |
| LSSVVTQHDSK                          | 1201.3             | 2            | 2.8674 | 0.2731 |
| LSSVVTQHDSKK                         | 1329.5             | 2            | 3.2731 | 0.3656 |
| LSSWVLLMK                            | 1077.4             | 2            | 2.7711 | 0.214  |

| Peptide Sequence                   | Peptide mass (m/z) | Charge State | Xcorr  | DelCn2 |
|------------------------------------|--------------------|--------------|--------|--------|
| LSTDHIPILYR                        | 1328.5             | 2            | 2.7516 | 0.2017 |
| LSTHELTSLLEKELEQSQKEASDLLEQNR      | 3370.7             | 3            | 4.3216 | 0.416  |
| LSTIALALGVER                       | 1243.5             | 2            | 4.0547 | 0.4057 |
| LSTVASTDILATVLEEMPPFPERESSILAK     | 3246.7             | 3            | 3.3879 | 0.1395 |
| LSVAAQEAAR                         | 1016.1             | 2            | 3.4339 | 0.2883 |
| LSVDYGKK                           | 910.0              | 2            | 2.4787 | 0.1246 |
| LSVFANGVVTSIQDR                    | 1606.8             | 2            | 4.3859 | 0.3878 |
| LSVGLDEEDLLEDLDQALKAAHPPSGSHS      | 3174.4             | 3            | 3.8356 | 0.1777 |
| LSVISVEDPPQR                       | 1340.5             | 3            | 3.2426 | 0.2247 |
| LSVLGAITSVQQR                      | 1372.6             | 2            | 3.7975 | 0.3104 |
| LSVNSHFMK                          | 1063.3             | 2            | 2.4658 | 0.2172 |
| LSVNSVTAGDYSRPLHISTFINELDSGFR      | 3197.5             | 3            | 5.1675 | 0.4839 |
| LSVSGRDENSVELTMAEGPYK              | 2283.5             | 3            | 3.5676 | 0.2276 |
| LSVSNMVHTAK                        | 1187.4             | 2            | 3.006  | 0.3634 |
| LSYAGGRPPSYAGSPVHHAER              | 2281.5             | 3            | 3.3588 | 0.2855 |
| LSYLLMCLESAVHR                     | 1636.0             | 2            | 3.144  | 0.343  |
| LSYNTASNK                          | 998.1              | 2            | 2.6599 | 0.2532 |
| LTAASVGVQSGGWGLGFNK                | 2036.3             | 3            | 6.0103 | 0.5274 |
| LTAASVGVQSGGWGLGFNKER              | 2321.6             | 2            | 2.9916 | 0.2885 |
| LTADDEAFLSANAGAILSQFEK             | 2312.5             | 3            | 4.1655 | 0.1316 |
| LTAEELLNKDFAK                      | 1492.7             | 2            | 3.0516 | 0.2781 |
| LTAFVNTLNGK                        | 1178.4             | 2            | 2.5734 | 0.1647 |
| LTAGLGSLIPEGDAGPDAAGPDAAGPLLPRPQVK | 3280.7             | 3            | 3.7764 | 0.2628 |
| LTADILTTCAADIQR                    | 1719.0             | 2            | 4.3848 | 0.362  |
| LTAQVASLTSELTTLNATIQQQDQELAGLK     | 3187.5             | 3            | 4.1588 | 0.2654 |
| LTAQVASLTSELTTLNATIQQQDQELAGLKQQAQ | 3643.1             | 3            | 6.0755 | 0.5162 |
| LTASAPGYLAITK                      | 1306.5             | 2            | 3.6168 | 0.3891 |
| LTASAPGYLAITKK                     | 1434.7             | 2            | 3.2122 | 0.4148 |
| LTAVEGSMKENISK                     | 1507.7             | 2            | 3.5277 | 0.3158 |
| LTAYAMTIPFVR                       | 1383.7             | 2            | 3.7789 | 0.39   |
| LTAYLPAMSEDDDCYNGAARTGR            | 2677.9             | 3            | 3.2262 | 0.2107 |
| LTDEDFSPFGSGGGLFSGGK               | 1976.1             | 2            | 3.8412 | 0.3042 |
| LTDIHGNVLQYHK                      | 1538.7             | 2            | 4.0813 | 0.3738 |
| LTDIHGNVLQYHKDVK                   | 1881.1             | 2            | 4.3809 | 0.4131 |
| LTDKHQSIEEAK                       | 1399.5             | 2            | 2.9385 | 0.1628 |
| LTDKTVIGCSGFHGDCLTLTK              | 2210.6             | 2            | 3.8779 | 0.3104 |



| Peptide Sequence                     | Peptide mass (m/z) | Charge State | Xcorr  | DelCn2 |
|--------------------------------------|--------------------|--------------|--------|--------|
| LTDLASQMAEMQLAELRAEIK                | 2362.8             | 3            | 3.8833 | 0.1863 |
| LTDNIFLEILYSTDPK                     | 1883.1             | 2            | 3.1297 | 0.3171 |
| LTDPLSSLSALSTQVANLPNTVQHMLLSDALTPQKK | 3891.4             | 3            | 4.2185 | 0.434  |
| LTDPIPTTETSIAPR                      | 1612.8             | 2            | 3.7417 | 0.2969 |
| LTDQVMQNPR                           | 1202.4             | 2            | 3.2237 | 0.1638 |
| LTDTLVSK                             | 877.0              | 2            | 2.6162 | 0.1816 |
| LTEAAEQNKEAIR                        | 1473.6             | 2            | 3.0751 | 0.111  |
| LTEAKPVDK                            | 1001.2             | 2            | 2.8803 | 0.2102 |
| LTEAKPVDKVK                          | 1228.5             | 2            | 3.7554 | 0.3071 |
| LTEDEEGNAKLQQR                       | 1631.7             | 2            | 4.0341 | 0.2567 |
| LTEDKADVQSIIGLQR                     | 1787.0             | 2            | 5.3631 | 0.3711 |
| LTEDKKEGLR                           | 1189.3             | 2            | 2.4597 | 0.118  |
| LTEDLEYHELLDR                        | 1646.8             | 2            | 3.9603 | 0.2441 |
| LTEELKEQMK                           | 1249.5             | 2            | 3.2896 | 0.1359 |
| LTEELNKEATVIQDLKTELLQRPGIEDVAVLKK    | 3736.3             | 3            | 6.292  | 0.3911 |
| LTEKELAEAASK                         | 1290.4             | 2            | 3.8345 | 0.2001 |
| LTELETAVR                            | 1032.2             | 2            | 3.5345 | 0.2383 |
| LTELGTVDPK                           | 1073.2             | 2            | 2.9487 | 0.1102 |
| LTELLENDPSVR                         | 1386.5             | 2            | 3.4889 | 0.159  |
| LTELLKQGQYSPMAIEEQVAVIYAGVR          | 3008.5             | 3            | 3.6674 | 0.2533 |
| LTELQLRARQLLDQVEIQKEQDYQR            | 3243.6             | 3            | 4.0407 | 0.2004 |
| LTELSMQDEELMKR                       | 1724.0             | 2            | 3.7765 | 0.3527 |
| LTEMETLQSQLMAEK                      | 1753.0             | 2            | 5.1034 | 0.381  |
| LTEPQHGLGSQR                         | 1323.4             | 2            | 3.0497 | 0.3929 |
| LTESPCALVASQYGWSGNMER                | 2300.6             | 2            | 2.9554 | 0.2413 |
| LTESVDVLPNVGEIVGGSMR                 | 2204.6             | 2            | 3.8594 | 0.2245 |
| LTEVLTDSHVK                          | 1242.4             | 2            | 3.4019 | 0.2785 |
| LTEVPVEPVLTVHPESK                    | 1875.2             | 2            | 4.2865 | 0.3912 |
| LTFASTLSHLR                          | 1246.4             | 2            | 2.9358 | 0.2859 |
| LTFDSSFSPNTGK                        | 1401.5             | 2            | 2.7988 | 0.2201 |
| LTFDSSFSPNTGKK                       | 1529.7             | 2            | 3.593  | 0.2053 |
| LTFDSTTFSPNTGK                       | 1429.6             | 2            | 4.571  | 0.4492 |
| LTFDSTTFSPNTGKK                      | 1557.7             | 2            | 3.0021 | 0.2366 |
| LTFSGLLNALDGVASTEAR                  | 1936.2             | 2            | 5.0357 | 0.3779 |
| LTFVDFLTYDILDQNR                     | 1974.2             | 2            | 3.453  | 0.2941 |
| LTGFHETSNINDFSAGVANR                 | 2151.3             | 3            | 4.1698 | 0.3064 |

| Peptide Sequence                  | Peptide mass (m/z) | Charge State | Xcorr  | DelCn2 |
|-----------------------------------|--------------------|--------------|--------|--------|
| LTGIKHELQANCYEEVKDR               | 2247.5             | 3            | 5.7814 | 0.5192 |
| LTGKDVNFEPFQL                     | 1785.0             | 2            | 4.1493 | 0.2091 |
| LTGMPDLTSLFMNPR                   | 1694.0             | 2            | 3.1549 | 0.1925 |
| LTGQLFLGGSIVK                     | 1333.6             | 2            | 4.0922 | 0.3577 |
| LTGTIQNDILKEFMVR                  | 1879.2             | 2            | 3.6275 | 0.3903 |
| LTGVFAPRPSTGPHK                   | 1565.8             | 2            | 3.7148 | 0.2744 |
| LTGVNDKMAEYTNAGVPSLNAALMHTLQR     | 3204.6             | 3            | 4.6217 | 0.3032 |
| LTGVSISQVNHKPLR                   | 1649.9             | 2            | 3.2573 | 0.3219 |
| LTHDASNIHTSTPR                    | 1550.7             | 2            | 3.5152 | 0.4407 |
| LTHLHEGLPVK                       | 1244.5             | 2            | 3.4116 | 0.3311 |
| LTHLIDHLKEQEK                     | 1604.8             | 2            | 4.0716 | 0.3075 |
| LTHVDSPLPAGPLGQVK                 | 1930.2             | 2            | 4.2093 | 0.22   |
| LTHVLTGK                          | 869.0              | 1            | 2.4852 | 0.2743 |
| LTHVPQGHGELLCHR                   | 1813.0             | 3            | 3.2    | 0.1749 |
| LTHVTALK                          | 883.1              | 2            | 2.4564 | 0.1091 |
| LTIFDEEVDPEGLFGPGR                | 2107.3             | 2            | 5.2594 | 0.4593 |
| LTIGEGQQHHLGGAK                   | 1546.7             | 2            | 3.1985 | 0.2245 |
| LTIGSNLSIR                        | 1074.3             | 2            | 2.7636 | 0.2873 |
| LTISPDYAYGATGHPIPPHATLVFDVELLK    | 3407.9             | 3            | 4.0795 | 0.2865 |
| LTISPDYAYGATGHPIPPHATLVFDVELLKLE  | 3650.2             | 3            | 4.2918 | 0.2397 |
| LTITQFMNHPWINQSMVVPQTPLHTAR       | 3162.7             | 3            | 3.4381 | 0.1527 |
| LTKDFSALESQQLQDTQELLQEENR         | 2837.0             | 3            | 6.0212 | 0.4291 |
| LTKDFSALESQQLQDTQELLQEENRQK       | 3093.3             | 2            | 5.3707 | 0.3975 |
| LTKDFSALESQQLQDTQELLQEENRQKLSLSTK | 3723.1             | 3            | 5.2704 | 0.3464 |
| LTKDNNLTGK                        | 1205.3             | 2            | 2.8076 | 0.2897 |
| LTKEEIVDKYDLFVGSQATDFGEALVR       | 3045.4             | 3            | 5.1879 | 0.3915 |
| LTKEVTAAR                         | 989.2              | 2            | 2.774  | 0.2344 |
| LTKIEGLQNLVNLR                    | 1611.9             | 2            | 3.2724 | 0.1454 |
| LTKQEEEEKQILKQDFETLSQETK          | 2795.1             | 3            | 4.8083 | 0.2901 |
| LTKVDDQIYSEFRK                    | 1743.0             | 3            | 3.645  | 0.2172 |
| LTLDKLDVK                         | 1045.3             | 2            | 2.5163 | 0.1791 |
| LTLDKLDVRGK                       | 1258.5             | 2            | 3.9037 | 0.235  |
| LTLDKLDVRGKR                      | 1414.7             | 3            | 3.8047 | 0.2927 |
| LTLDTIFVPNTGKK                    | 1547.8             | 2            | 3.3836 | 0.3468 |
| LTLHGLQQYYVK                      | 1463.7             | 2            | 2.4795 | 0.1534 |
| LTLKGGAAVDPDSGLEHSAHVLEK          | 2445.7             | 3            | 4.5086 | 0.4149 |

| Peptide Sequence                   | Peptide mass (m/z) | Charge State | Xcorr  | DelCn2 |
|------------------------------------|--------------------|--------------|--------|--------|
| LTLHNGEPLYIPVTQEPAPMTEDLLEEQSEVLAK | 3920.4             | 3            | 6.0482 | 0.466  |
| LTLQPVNSTISLQMGTK                  | 2061.3             | 2            | 4.9065 | 0.3854 |
| LTLQTTSDGVMLDKDLFK                 | 2026.3             | 2            | 4.1896 | 0.2685 |
| LTLQTTSDGVMLDKDLFKK                | 2154.5             | 2            | 3.7795 | 0.363  |
| LTLALIDGK                          | 1031.2             | 2            | 3.4703 | 0.2985 |
| LTLALIDGKNFSAGGHK                  | 1830.1             | 3            | 4.1668 | 0.3498 |
| LTLALLDGK                          | 1031.2             | 2            | 3.0817 | 0.2439 |
| LTLALLDGKKNVNAGGHK                 | 1809.1             | 2            | 5.2578 | 0.3659 |
| LTLALLDGKKNVNAGGHKLGLEFQA          | 2738.1             | 3            | 5.0792 | 0.4597 |
| LTLALVDGK                          | 1017.2             | 2            | 3.4428 | 0.3258 |
| LTLALVDGKSNAGGHK                   | 1782.0             | 2            | 3.5348 | 0.3992 |
| LTLYDIAHTPGVAADLSHIETK             | 2366.7             | 3            | 7.3803 | 0.5413 |
| LTLYDIAHTPGVAADLSHIETKAAVK         | 2736.1             | 3            | 4.7797 | 0.3879 |
| LTMQNLNDR                          | 1105.3             | 2            | 2.6586 | 0.19   |
| LTMQNLNDRLASYLKVR                  | 2151.5             | 3            | 4.2499 | 0.3803 |
| LTMQVSSLQR                         | 1163.4             | 2            | 3.4012 | 0.2324 |
| LTNENLDLKEKLEKNER                  | 2428.7             | 3            | 4.292  | 0.3077 |
| LTNSMMHGR                          | 1178.4             | 2            | 3.127  | 0.3456 |
| LTPEEEEILNK                        | 1315.5             | 2            | 3.3259 | 0.2319 |
| LTPEEEEILNKKR                      | 1599.8             | 2            | 3.9938 | 0.3173 |
| LTPITYPQGLAMAK                     | 1504.8             | 2            | 3.4849 | 0.4512 |
| LTPLPEDNSMNVDDQDGDPSDR             | 2316.4             | 2            | 4.284  | 0.4581 |
| LTPLQLEIQR                         | 1211.4             | 2            | 3.1399 | 0.2863 |
| LTPLSHEVISR                        | 1252.4             | 2            | 2.4561 | 0.2938 |
| LTPTEVKDYLAIA                      | 1505.7             | 2            | 2.8066 | 0.108  |
| LTQDAVAKANQTK                      | 1388.6             | 2            | 3.0442 | 0.3433 |
| LTQDQDQDVK                         | 1161.2             | 2            | 3.19   | 0.1876 |
| LTQDQDQDVKYFAQEALTVLSLA            | 2568.9             | 2            | 3.0051 | 0.2361 |
| LTQILSYLR                          | 1107.3             | 2            | 3.218  | 0.2403 |
| LTQLQELDLSNNHLETLPDNLGLSHLR        | 3085.4             | 3            | 4.0691 | 0.1269 |
| LTQQLEEEERIQHQK                    | 1909.1             | 2            | 4.2648 | 0.2719 |
| LTQYMDGSGMPK                       | 1328.5             | 2            | 2.9356 | 0.1521 |
| LTRDETNYGIPQR                      | 1563.7             | 3            | 3.5442 | 0.3018 |
| LTRPGSSYFNLNPFEVLQIDPEVTDEEIK      | 3352.7             | 3            | 5.284  | 0.2912 |
| LTRPGSSYFNLNPFEVLQIDPEVTDEEIKK     | 3480.9             | 3            | 4.7532 | 0.2135 |
| LTRPGSSYFNLNPFEVLQIDPEVTDEEIKKR    | 3637.1             | 3            | 6.0714 | 0.4264 |

| Peptide Sequence                                                      | Peptide mass (m/z) | Charge State | Xcorr  | DelCn2 |
|-----------------------------------------------------------------------|--------------------|--------------|--------|--------|
| LTRSQFLLLTNKFK                                                        | 1710.1             | 2            | 2.5705 | 0.1303 |
| L TSAIAKQEDVSVQLEALDIMADMLSR                                          | 2949.4             | 3            | 3.7524 | 0.2926 |
| L T S A V S S L P E L L E K                                           | 1487.7             | 2            | 3.9116 | 0.3351 |
| L T S D D V K E Q I Y K                                               | 1439.6             | 2            | 4.1402 | 0.3613 |
| L T S D S T V Y D Y A G K                                             | 1420.5             | 2            | 3.1709 | 0.3016 |
| L T S E L D K L T T L Y E N L S I H N Q Q L E E E V K D L A D K K     | 3860.3             | 3            | 4.2574 | 0.2817 |
| L T S F I G A I A I G D L V K                                         | 1518.8             | 2            | 5.9644 | 0.3457 |
| L T S K E E E L K D I Q N M N F L L K                                 | 2294.7             | 2            | 5.8086 | 0.4166 |
| L T S L A A A L D E N K D G K V N I D D L V K                         | 2443.7             | 2            | 5.2373 | 0.4047 |
| L T S L V P F V D A F Q L E R                                         | 1736.0             | 2            | 4.3572 | 0.402  |
| L T S N P L A S H D Y I L K                                           | 1572.8             | 2            | 3.1909 | 0.3003 |
| L T T D F N V I V E A L S K                                           | 1550.8             | 2            | 4.6422 | 0.4254 |
| L T T E E V I K E L A Q I A G R P T E D E D E K E K                   | 2973.2             | 3            | 4.499  | 0.3053 |
| L T T L E L L E V R                                                   | 1187.4             | 2            | 4.0445 | 0.2505 |
| L T T P T Y G D L N H L V S A T M S G V T T C L R                     | 2653.0             | 2            | 4.9024 | 0.5436 |
| L T T P T Y G D L N H L V S A T M S G V T T S L R                     | 2637.0             | 2            | 4.1396 | 0.3774 |
| L T T P T Y G D L N H L V S A T M S G V T T S L R F P G Q L N A D L R | 3749.2             | 3            | 3.7945 | 0.2301 |
| L T T V L N S G F L D E W L T L E D V P S G R                         | 2563.8             | 2            | 3.7819 | 0.4333 |
| L T V A D A L E P V Q F E D G E K                                     | 1862.0             | 2            | 3.4363 | 0.3162 |
| L T V D G L E K E R                                                   | 1160.3             | 2            | 2.6514 | 0.2169 |
| L T V E D L E K E R                                                   | 1232.4             | 2            | 2.9772 | 0.3158 |
| L T V E D L E K E R D F Y F G K                                       | 1990.2             | 2            | 3.9242 | 0.3843 |
| L T V E D L E K E R D F Y F G K L R                                   | 2259.5             | 3            | 3.8798 | 0.34   |
| L T V E D P V T V E Y I T R                                           | 1635.8             | 3            | 4.6759 | 0.4423 |
| L T V E N S P K Q E A G I S E G Q G T A G E E E E K K K               | 2975.2             | 3            | 5.5084 | 0.4407 |
| L T V M S L Q E S G L K                                               | 1306.6             | 2            | 2.5456 | 0.1366 |
| L T V N E A V K E G V V G P E L H H K                                 | 2057.3             | 2            | 5.1619 | 0.466  |
| L T V V D T P G Y G D A I N C R D C F K                               | 2188.5             | 2            | 2.9359 | 0.2168 |
| L T V Y T T L I D V T K                                               | 1367.6             | 2            | 3.5529 | 0.2956 |
| L T Y E I E D E K R                                                   | 1296.4             | 2            | 2.9097 | 0.3106 |
| L T Y R N P Q P Q P V D G V F V Y P L A E A E V V S G F E A E A A G R | 3779.2             | 3            | 6.1102 | 0.4051 |
| L T Y T A E V S V P K                                                 | 1208.4             | 2            | 2.4173 | 0.2647 |
| L V A A P L F E L Y D N A P G Y G P I I S S L P Q L L S R             | 3116.6             | 3            | 3.9304 | 0.4217 |
| L V A A S Q A A L G L                                                 | 1014.2             | 2            | 3.9726 | 0.3178 |
| L V A E F T T S L T N F Q K                                           | 1599.8             | 2            | 4.106  | 0.3869 |
| L V A E N K F G K                                                     | 1006.2             | 1            | 2.4265 | 0.134  |

| Peptide Sequence                    | Peptide mass (m/z) | Charge State | Xcorr  | DelCn2 |
|-------------------------------------|--------------------|--------------|--------|--------|
| LVAENKFGKK                          | 1134.4             | 2            | 3.6572 | 0.1963 |
| LVAGEMGQNEPDQGGQR                   | 1786.9             | 2            | 5.6054 | 0.375  |
| LVAIVDPHIK                          | 1105.4             | 2            | 3.3386 | 0.1369 |
| LVAIVDVIDQNR                        | 1355.6             | 2            | 4.1127 | 0.3232 |
| LVALSEPALALLGLGAPPAR                | 1930.3             | 2            | 3.233  | 0.2643 |
| LVASAYSIAQK                         | 1151.3             | 2            | 3.3988 | 0.3281 |
| LVAVFYTVITPMLNPIIYTLR               | 2439.0             | 3            | 3.5839 | 0.1355 |
| LVCQGSEALGHGVGPHQHSGPAPPAAVPPPR     | 3079.4             | 3            | 3.4785 | 0.2011 |
| LVDISYGGENGFNQAIELSTEVLSNVK         | 2898.2             | 3            | 3.6816 | 0.2147 |
| LVDKFLEDVK                          | 1206.4             | 2            | 2.6001 | 0.1207 |
| LVDKFLEDVKK                         | 1334.6             | 2            | 3.8073 | 0.2036 |
| LVDKSTELNEEPLMR                     | 1775.0             | 2            | 3.1913 | 0.1906 |
| LVDNEQLNLEDEDEDIESIDATK             | 2404.5             | 2            | 5.6394 | 0.389  |
| LVDQNIFSFYLSR                       | 1602.8             | 2            | 4.8494 | 0.4594 |
| LVDQNIFSFYLSRDPDAQPGGELMLGGTDSK     | 3372.7             | 3            | 6.57   | 0.5014 |
| LVDQNIFSFYLSRDPDAQPGGELMLGGTDSKYYYK | 3827.2             | 3            | 5.6633 | 0.5006 |
| LVDSKGFDEYMK                        | 1432.6             | 2            | 2.8422 | 0.1235 |
| LVDSKGFDEYMKELGVGIALR               | 2341.7             | 3            | 4.7368 | 0.3428 |
| LVDSKGFDEYMKELGVGIALRK              | 2469.9             | 3            | 4.616  | 0.3705 |
| LVDVTTAQV                           | 946.1              | 2            | 2.6289 | 0.1341 |
| LVDYLDVGFDTTR                       | 1514.7             | 2            | 4.5272 | 0.4525 |
| LVEALCAEHQINLIK                     | 1695.0             | 2            | 2.6967 | 0.1857 |
| LVEALPYNTSLVEMK                     | 1708.0             | 2            | 3.8285 | 0.421  |
| LVEARPMIHELLTEGR                    | 1865.2             | 2            | 2.906  | 0.1837 |
| LVEDKPGSR                           | 1001.1             | 2            | 2.4696 | 0.2495 |
| LVEDMENKIR                          | 1247.4             | 2            | 2.7215 | 0.2393 |
| LVEDTKHRPKENLELILTQSVENVGVR         | 3118.5             | 3            | 4.5413 | 0.2721 |
| LVEGILHAPDAGWGNLVYVVNYPK            | 2626.0             | 3            | 4.2213 | 0.3448 |
| LVEGILHAPDAGWGNLVYVVNYPKDNK         | 2983.4             | 3            | 6.0303 | 0.3609 |
| LVEGILHAPDAGWGNLVYVVNYPKDNKR        | 3139.6             | 3            | 4.8563 | 0.3135 |
| LVEIAQVPK                           | 997.2              | 2            | 3.3046 | 0.2276 |
| LVEIDNGKQR                          | 1172.3             | 2            | 3.073  | 0.2242 |
| LVEIDNGKQREFESR                     | 1821.0             | 2            | 3.0567 | 0.1861 |
| LVEKGETDLIQK                        | 1373.6             | 2            | 3.2366 | 0.1567 |
| LVEKPSPLTLAPHDFANIK                 | 2091.4             | 3            | 3.702  | 0.2279 |

| Peptide Sequence              | Peptide mass (m/z) | Charge State | Xcorr  | DelCn2 |
|-------------------------------|--------------------|--------------|--------|--------|
| LVEKPSPLTLAPHDFANIKANVK       | 2503.9             | 3            | 4.0152 | 0.4727 |
| LVEPGSPA EK                   | 1027.2             | 2            | 2.757  | 0.2743 |
| LVESLPQEIK                    | 1156.4             | 2            | 2.9185 | 0.2181 |
| LVETLQADSGLLLDALLAR           | 2012.3             | 3            | 4.6837 | 0.3029 |
| LVEVDSGR                      | 875.0              | 1            | 1.6415 | 0.1099 |
| LVEVDSSRQQEYDFK               | 1844.0             | 2            | 3.4302 | 0.2372 |
| LVEVIKTPMTSQK                 | 1474.8             | 2            | 3.8803 | 0.2688 |
| LVEVIKTPMTSQKTFESLVDFSK       | 2629.1             | 3            | 4.7788 | 0.4797 |
| LVEVNGENVEKETHQQVVS R         | 2295.5             | 3            | 5.3627 | 0.4118 |
| LVEYDIDEVVYDEDSPYQNIK         | 2547.7             | 3            | 5.1492 | 0.4451 |
| LVFDEYLK                      | 1027.2             | 2            | 2.4028 | 0.163  |
| LVFHTQLAHGSPTGR               | 1621.8             | 2            | 4.3563 | 0.4848 |
| LVFLGLDNAGK                   | 1147.3             | 2            | 3.023  | 0.1933 |
| LVGAIVYYDGGQHNDAR             | 1791.9             | 2            | 3.6376 | 0.3187 |
| LVGATATSSPPPK                 | 1226.4             | 2            | 2.6882 | 0.2016 |
| LVGEIMQETGTR                  | 1334.5             | 2            | 3.2038 | 0.2536 |
| LVGGKDFEQPLAIS R              | 1630.9             | 2            | 4.2855 | 0.4083 |
| LVGGTTPGK                     | 830.0              | 2            | 2.5988 | 0.1261 |
| LVGILDILDEENRLPQPSDQHFTSAVHQK | 3301.7             | 3            | 5.8779 | 0.375  |
| LVGLTGTREEVDQVAR              | 1743.9             | 3            | 3.6352 | 0.1791 |
| LVGP EEALSPGEAR               | 1425.6             | 2            | 3.5374 | 0.3515 |
| LVGQGASAVLLDLPNSGG EAQAK      | 2196.4             | 3            | 6.7146 | 0.5318 |
| LVGQGASAVLLDLPNSGG EAQAKK     | 2324.6             | 3            | 4.4726 | 0.4113 |
| LVGRPPLPVPVAVGIGTVHLHQHEDILAK | 2965.5             | 3            | 5.8596 | 0.4881 |
| LVGSDQAPGR                    | 1000.1             | 2            | 2.4418 | 0.2442 |
| LVGSDQAPGRDK                  | 1243.4             | 2            | 3.0535 | 0.2149 |
| LVGSQEELASWGHEYVR             | 1961.1             | 2            | 4.2097 | 0.3911 |
| LVGVFHTEYGALNR                | 1576.8             | 2            | 4.0668 | 0.4157 |
| LVGYLDR                       | 836.0              | 2            | 2.6625 | 0.2222 |
| LVHAALAEELGGPVHALAIQAR        | 2237.6             | 3            | 3.584  | 0.3367 |
| LVHASEQYSK                    | 1162.3             | 2            | 2.7155 | 0.2393 |
| LVHDKELAAEDEQVFLMK            | 2116.4             | 3            | 4.0572 | 0.2761 |
| LVHHILQDMYK                   | 1397.7             | 2            | 3.1605 | 0.3148 |
| LVHIIGALR                     | 992.2              | 2            | 2.4657 | 0.1849 |
| LVHLQTLVLNGNPLLHAQLR          | 2250.7             | 3            | 5.7438 | 0.4516 |
| LVHLVESWDLRSGLLHV AIR         | 2314.7             | 2            | 2.69   | 0.1202 |

| Peptide Sequence                  | Peptide mass (m/z) | Charge State | Xcorr  | DelCn2 |
|-----------------------------------|--------------------|--------------|--------|--------|
| LVHLWSSDSHQPLWSR                  | 1949.2             | 2            | 3.618  | 0.3195 |
| LVIADTGHR                         | 1119.3             | 2            | 2.4172 | 0.2035 |
| LVIAGHLLR                         | 992.2              | 2            | 2.7889 | 0.1852 |
| LVIIEGDLERTEERAELAESR             | 2429.7             | 3            | 4.0195 | 0.2453 |
| LVIKNQQFHK                        | 1255.5             | 2            | 2.429  | 0.1207 |
| LVINGNPITIFQER                    | 1614.9             | 2            | 3.4599 | 0.3998 |
| LVINGNPITIFQERDPSK                | 2042.3             | 2            | 4.344  | 0.3823 |
| LVINGNPITIFQERDPSKIK              | 2283.7             | 2            | 3.8272 | 0.2944 |
| LVINSGNGAVEDR                     | 1344.5             | 2            | 3.8813 | 0.3612 |
| LVINSGNGAVEDRKPSGLNGEASK          | 2413.6             | 3            | 3.695  | 0.3848 |
| LVIPSELGYGER                      | 1333.5             | 2            | 2.7144 | 0.1623 |
| LVIQDKNKYNTPK                     | 1561.8             | 2            | 3.2458 | 0.1256 |
| LVKDVFISAAER                      | 1348.6             | 2            | 3.0378 | 0.3781 |
| LVKDVFISAAERDVYTG DALR            | 2339.6             | 2            | 2.7603 | 0.1724 |
| LVKELEGVITK                       | 1229.5             | 2            | 3.4892 | 0.2727 |
| LVKGHAYSVTGAEVEESNGSLQK           | 2404.6             | 3            | 4.2253 | 0.2381 |
| LVKYDEFHDYLER                     | 1727.9             | 2            | 2.5763 | 0.3354 |
| LVLDSVKLEA                        | 1087.3             | 2            | 3.2672 | 0.2266 |
| LVLDTVNEVSR                       | 1245.4             | 2            | 3.3298 | 0.258  |
| LVLEVAQHLGESTVR                   | 1651.9             | 2            | 4.9206 | 0.5395 |
| LVLINTPPGDQKEKGEMGLGAVPGR         | 2449.8             | 3            | 3.719  | 0.3414 |
| LVLGSAVGK                         | 1086.3             | 2            | 2.8848 | 0.1149 |
| LVLNRNPVNYFAEVEQIAFDPSNMPPGIEASPK | 3774.2             | 3            | 5.3379 | 0.3676 |
| LVLPSLISSR                        | 1085.3             | 2            | 2.5123 | 0.1134 |
| LVLSGEKVLETLQEKGER                | 2029.3             | 2            | 4.6736 | 0.3614 |
| LVLTTNNQLTTLPR                    | 1483.7             | 2            | 2.7763 | 0.2837 |
| LVLTTQEQQLHQLHSR                  | 1702.9             | 2            | 4.416  | 0.2724 |
| LVLVGDGGTGK                       | 1016.2             | 1            | 2.8061 | 0.2931 |
| LVLVNAIYFK                        | 1180.5             | 2            | 3.5456 | 0.2701 |
| LVLVNAVYFR                        | 1194.5             | 2            | 4.0791 | 0.3578 |
| LVLVSPTSEQYDSLLR                  | 1821.1             | 2            | 4.4346 | 0.4343 |
| LVMAAANR                          | 846.0              | 2            | 2.9702 | 0.1461 |
| LVMAESEKSKLEER                    | 1778.0             | 2            | 3.6854 | 0.2486 |
| LVMEDGKMDPVAYR                    | 1624.9             | 2            | 3.3466 | 0.4188 |
| LVMEEAPESYK                       | 1296.5             | 2            | 3.2213 | 0.2198 |
| LVNAAGSGR                         | 844.9              | 1            | 3.2497 | 0.2563 |

| Peptide Sequence                         | Peptide mass (m/z) | Charge State | Xcorr  | DelCn2 |
|------------------------------------------|--------------------|--------------|--------|--------|
| LVNACLAEEELPHIHAFEQK                     | 2163.5             | 2            | 5.0777 | 0.3615 |
| LVNELTEKTGKLQQEEVQKK                     | 2343.7             | 3            | 3.2003 | 0.1196 |
| LVNEVTEFAK                               | 1150.3             | 2            | 3.775  | 0.3804 |
| LVNHFVEEFK                               | 1262.4             | 2            | 3.4579 | 0.3119 |
| LVNHFVEEFKR                              | 1418.6             | 3            | 4.032  | 0.4021 |
| LVNHFVEEFKRK                             | 1546.8             | 2            | 3.1126 | 0.2989 |
| LVNLQHLDLLNNK                            | 1534.8             | 2            | 4.6826 | 0.3196 |
| LVNLQHLDLLNNKLVTLPVSFQALQK               | 2832.4             | 3            | 6.0483 | 0.4452 |
| LVNLYGLLHGLQAAVAQQDTLMEAR                | 2726.1             | 3            | 3.6736 | 0.212  |
| LVNNADKQQAGR                             | 1314.4             | 2            | 3.1757 | 0.271  |
| LVNNGEKLEFLHK                            | 1541.8             | 2            | 3.2292 | 0.1916 |
| LVNNGEKLEFLHKTPVEEVPAAIAPFQGR            | 3205.7             | 3            | 4.588  | 0.2508 |
| LVNQQLLADPLVPPQLTIK                      | 2101.5             | 2            | 3.3895 | 0.2271 |
| LVNQQLLADPLVPPQLTIKDFYMTDSISR            | 3317.8             | 3            | 5.3822 | 0.4597 |
| LVNSVAGCADDALAGLVACNPNLQLLQGHR           | 3034.5             | 3            | 3.4027 | 0.1963 |
| LVNTSENLSK                               | 1105.2             | 2            | 2.9426 | 0.1832 |
| LVNVSSMGGGAPMER                          | 1505.7             | 2            | 4.5281 | 0.4746 |
| LVPFDHAESTYGLYR                          | 1768.9             | 2            | 3.2412 | 0.4304 |
| LVPGPVFGSKDNFHLGLAIFLDYTPNDETER          | 3451.8             | 3            | 3.6243 | 0.2541 |
| LVPGRHDIAFVEFENDGQAGAAR                  | 2470.7             | 3            | 4.7113 | 0.2956 |
| LVPKHEEEAFTAFTAPEDSLASVPYPPLLR           | 3423.9             | 3            | 4.0986 | 0.2078 |
| LVPLKETIK                                | 1041.3             | 1            | 1.9309 | 0.1211 |
| LVPLKETIKGFQQILAGEYDHLPEQAFYMVGPPIEEAVAK | 4375.0             | 3            | 3.4806 | 0.172  |
| LVPLLDPRPFDETTYEETED                     | 2283.4             | 2            | 3.3429 | 0.2867 |
| LVPLLDTGDIIDGGNSEYR                      | 2161.4             | 2            | 6.4548 | 0.508  |
| LVPLLEDGGEAPAALAALEEK                    | 2349.7             | 2            | 6.5366 | 0.6075 |
| LVPNMTPEVVGEQVTSYLTK                     | 2206.5             | 3            | 4.9245 | 0.4035 |
| LVPNMTPEVVGEQVTSYLTKK                    | 2334.7             | 2            | 4.4866 | 0.3571 |
| LVPKHEEEAFTAFTAPEDSLASVPYPPLLR           | 3423.9             | 3            | 4.0986 | 0.2078 |
| LVQAAQMLQSDPYSPARDYLIDGSR                | 2895.2             | 3            | 5.1329 | 0.4855 |
| LVQAFQFTDK                               | 1197.4             | 2            | 3.6087 | 0.2945 |
| LVQAFQFTDKHGEVCPAGWKPGSDTIKPDVQK         | 3529.0             | 3            | 5.7978 | 0.4624 |
| LVQAFQYTDHGEVCPAGWKPGSDTIKPNVDDSKEYFSK   | 4388.8             | 3            | 5.4524 | 0.3781 |
| LVQAFQYTDK                               | 1213.4             | 2            | 3.0157 | 0.1087 |
| LVQAFQYTDKHGEVCPAGWKPGSETIIPDPAGK        | 3542.0             | 3            | 5.4791 | 0.3497 |
| LVQDVANNTNEEAGDGTATVTLAR                 | 2561.7             | 2            | 6.9026 | 0.6113 |



| Peptide Sequence                  | Peptide mass (m/z) | Charge State | Xcorr  | DelCn2 |
|-----------------------------------|--------------------|--------------|--------|--------|
| LVQDYGLESEVAQHLAATYGDKAFAFEVAK    | 3054.4             | 3            | 4.9778 | 0.3987 |
| LVQEQGSHSK                        | 1113.2             | 2            | 3.1761 | 0.2031 |
| LVQIEYALAAVAGGAPSVGIK             | 2028.4             | 3            | 4.5761 | 0.3508 |
| LVQNCLWTLR                        | 1246.5             | 2            | 2.5041 | 0.1715 |
| LVQNIQTAVDQFVR                    | 1745.0             | 3            | 3.9909 | 0.2355 |
| LVQQGLLTPDMLK                     | 1456.8             | 2            | 4.3196 | 0.3682 |
| LVQSPNSYFMDVK                     | 1528.8             | 2            | 3.4421 | 0.3111 |
| LVREIAQDFKTDLR                    | 1705.0             | 2            | 5.0386 | 0.4112 |
| LVREIAQEFKTDLR                    | 1719.0             | 2            | 3.4528 | 0.1187 |
| LVRPEVDVMCTAFHDNEETFLK            | 2594.9             | 3            | 4.4389 | 0.3135 |
| LVRPEVDVMCTAFHDNEETFLKK           | 2723.1             | 2            | 4.2337 | 0.4423 |
| LVRPPVQVYGIAGR                    | 1583.9             | 3            | 4.4546 | 0.3304 |
| LVSDDLSSLANLVGNLIGNGTTK           | 2474.7             | 2            | 5.176  | 0.368  |
| LVSDVMVELIEK                      | 1504.8             | 2            | 4.8973 | 0.4026 |
| LVSDGNINSDR                       | 1190.2             | 2            | 3.29   | 0.3372 |
| LVSDTITQKVEEIDAAILR               | 2115.4             | 3            | 4.6177 | 0.2199 |
| LVSELDANLQVENVRDQALILMNAR         | 2941.3             | 3            | 4.0333 | 0.2605 |
| LVSESSDVLPK                       | 1174.3             | 2            | 3.8244 | 0.2911 |
| LVSGMQHPGSAGGVYETTQHFIDIK         | 2674.0             | 3            | 5.1255 | 0.437  |
| LVSGWVKPIIIGR                     | 1438.8             | 3            | 3.2119 | 0.1435 |
| LVSHLTAQLNELKEQMTEQR              | 2369.7             | 3            | 4.7096 | 0.2769 |
| LVSIGAEEIVDGNK                    | 1515.7             | 2            | 4.3068 | 0.4488 |
| LVSKDGK                           | 746.9              | 1            | 1.6721 | 0.1138 |
| LVSLIGSK                          | 817.0              | 2            | 2.5673 | 0.1504 |
| LVSNHSLHETSSVFVDSLTK              | 2201.4             | 2            | 5.7316 | 0.5201 |
| LVSPGSANETSSILVESVTR              | 2047.3             | 2            | 4.8027 | 0.478  |
| LVSQDNFGFDLPAVEAATK               | 2023.2             | 2            | 5.1494 | 0.4789 |
| LVSQDNFGFDLPAVEAATKKHEAIEDIAAYEER | 3780.1             | 3            | 5.1376 | 0.3587 |
| LVSSEQALKELGLAEHQLR               | 2122.4             | 3            | 4.5765 | 0.3473 |
| LVSSPCCIVTSTYGWTANMER             | 2319.7             | 2            | 3.8003 | 0.4124 |
| LVSVLQNK                          | 901.1              | 2            | 2.9243 | 0.1955 |
| LVTDLTK                           | 789.9              | 1            | 1.9513 | 0.1162 |
| LVTEFNSQTSK                       | 1325.4             | 2            | 3.5261 | 0.3068 |
| LVTEMGTATQSALSSSRPTK              | 2229.5             | 2            | 3.4409 | 0.2814 |
| LVTENLKEEPMESGKEK                 | 1962.2             | 3            | 3.2847 | 0.2526 |
| LVTLEEFLLASTQR                    | 1507.7             | 2            | 3.4409 | 0.2423 |

| Peptide Sequence            | Peptide mass (m/z) | Charge State | Xcorr  | DelCn2 |
|-----------------------------|--------------------|--------------|--------|--------|
| LVTLEEF LASTQRK             | 1635.9             | 2            | 2.5293 | 0.1797 |
| LVTLEEF LK                  | 1092.3             | 2            | 2.6407 | 0.1395 |
| LVT LK DVEDGAFLLR           | 1690.0             | 2            | 3.4247 | 0.2128 |
| LVTLPDITSVAK                | 1257.5             | 2            | 2.7411 | 0.1237 |
| LVTLPVSFAQLK                | 1316.6             | 2            | 3.5084 | 0.3418 |
| LVT PHGESEQIGVIPS KK        | 1920.2             | 3            | 4.1668 | 0.2425 |
| LVT SIGDVVN HDPVVG DRLK     | 2134.4             | 3            | 3.4    | 0.2139 |
| LVTSPCCIVTSTYGWTANMER       | 2333.7             | 3            | 3.8593 | 0.4107 |
| LVT TGVLK                   | 831.0              | 1            | 1.904  | 0.1326 |
| LVT TVTEIAG                 | 1004.2             | 1            | 1.6065 | 0.2116 |
| LVVHEGSPVTSISAR             | 1552.8             | 2            | 3.5113 | 0.3854 |
| LVV LDEELEGISPDELKDELPERQPR | 3020.3             | 3            | 4.1033 | 0.3662 |
| LVV LGIRPIR                 | 1136.5             | 2            | 2.5229 | 0.1021 |
| LVV LGSGGVGK                | 986.2              | 2            | 2.7032 | 0.1334 |
| LVV NFESDKLK                | 1292.5             | 2            | 3.5638 | 0.3341 |
| LVV VGAGGVGK                | 956.2              | 2            | 2.7333 | 0.1731 |
| LVV WAADRQAALTK             | 1542.8             | 2            | 3.1246 | 0.1387 |
| LVYLYLMNYAK                 | 1391.7             | 2            | 3.6527 | 0.3017 |
| LWDLTTGTTTR                 | 1265.4             | 2            | 2.8161 | 0.1688 |
| LWEEQLAAAK                  | 1159.3             | 2            | 3.0851 | 0.2242 |
| LWEPLVEEPPADQWKWPI          | 2234.5             | 2            | 3.3827 | 0.2664 |
| LWFTLDHPPKDWAYSK            | 2005.3             | 2            | 3.4364 | 0.3424 |
| LWGLTEMFPER                 | 1379.6             | 2            | 2.9677 | 0.2322 |
| LWISNGGLADIFTVFAK           | 1853.2             | 2            | 4.9745 | 0.4685 |
| LWRVPAEGLEEVLTTPETVLTGHTEK  | 2907.3             | 3            | 4.275  | 0.3147 |
| LWSNSHRPELVR                | 1494.7             | 2            | 2.6359 | 0.1028 |
| LYAGSTVK                    | 839.0              | 1            | 2.0292 | 0.1057 |
| LYARDHEDYDPQTVR             | 1879.0             | 3            | 3.2095 | 0.1467 |
| LYASHSQFIK                  | 1194.4             | 2            | 2.863  | 0.2567 |
| LYAVHQEGNKVGLDIEAEVPAVK     | 2594.9             | 3            | 4.1885 | 0.3661 |
| LYDAVLRGPMDSDDSHGSVLR       | 2304.5             | 3            | 4.9942 | 0.4058 |
| LYDAYELK                    | 1015.1             | 2            | 2.8495 | 0.2002 |
| LYDAYELKHALK                | 1464.7             | 2            | 3.8227 | 0.337  |
| LYDAYELKHALKGAGTNEK         | 2122.4             | 2            | 4.8209 | 0.3814 |
| LYDDIDFDIEEFAK              | 1733.9             | 2            | 4.9413 | 0.3762 |
| LYDIDVAKVNTLIRPDGEKK        | 2288.6             | 3            | 3.975  | 0.3721 |

| Peptide Sequence                      | Peptide mass (m/z) | Charge State | Xcorr  | DelCn2 |
|---------------------------------------|--------------------|--------------|--------|--------|
| LYDKIDPEKLSVNSHFMK                    | 2165.5             | 2            | 4.5861 | 0.313  |
| LYDLNHNEIGELIR                        | 1699.9             | 2            | 3.7766 | 0.3652 |
| LYDMQHTPTPIGDETEPTIIR                 | 2557.8             | 3            | 3.8321 | 0.236  |
| LYDNLLEQNLIR                          | 1504.7             | 2            | 4.3213 | 0.1814 |
| LYDNLLEQNLIRVIEPFSR                   | 2333.7             | 3            | 3.839  | 0.1319 |
| LYDRDVASAAPEKAENPAGHGSK               | 2384.5             | 3            | 3.6462 | 0.2345 |
| LYEALTPVH                             | 1043.2             | 2            | 2.6811 | 0.2798 |
| LYEEGSNKR                             | 1096.2             | 2            | 2.4213 | 0.1526 |
| LYELDGLR                              | 979.1              | 2            | 2.6218 | 0.1117 |
| LYEQLSGK                              | 938.1              | 1            | 2.7779 | 0.1505 |
| LYERGDASKEDIDTAMK                     | 1943.1             | 2            | 4.905  | 0.3877 |
| LYGDESELHFWTVAAHYHLHLSLSEK            | 2962.2             | 3            | 3.2044 | 0.2313 |
| LYGEKTYNFLPEFLVSTQK                   | 2278.6             | 2            | 5.0238 | 0.3762 |
| LYGPSSVSFADDFVR                       | 1660.8             | 2            | 4.6662 | 0.4959 |
| LYGPTNFAPIINHVAR                      | 1784.1             | 2            | 3.1883 | 0.2561 |
| LYGPTNFSPIINHVAR                      | 1800.1             | 2            | 3.5399 | 0.4194 |
| LYGSAGPPPTGEEDTAEKDEL                 | 2177.3             | 2            | 5.7279 | 0.5597 |
| LYGSEAFATDFQDSAAAK                    | 1893.0             | 2            | 5.7411 | 0.5375 |
| LYGSEAFATDFQDSAAAKK                   | 2021.2             | 2            | 3.7153 | 0.2997 |
| LYGSGDQEAQWQK                         | 1382.5             | 2            | 3.6355 | 0.2555 |
| LYHEADKTYMLR                          | 1540.8             | 2            | 3.2654 | 0.1989 |
| LYHNEVEIEK                            | 1274.4             | 2            | 2.8489 | 0.1114 |
| LYHNEVEIEKLNKELASK                    | 2158.4             | 2            | 4.3363 | 0.3443 |
| LYHSCADPTGCGTGPDPAR                   | 1822.0             | 3            | 3.5443 | 0.27   |
| LYHSEAFVNFVGDTEEAK                    | 2059.2             | 2            | 3.5161 | 0.2084 |
| LYHSEAFVNFVGDTEEAKK                   | 2187.4             | 2            | 6.397  | 0.5237 |
| LYHSEAFVNFVGDTEEAKKQINDYVEKGTQGK      | 3648.9             | 3            | 5.4094 | 0.426  |
| LYIDSYEKDVAK                          | 1444.6             | 2            | 3.5583 | 0.451  |
| LYIGLAGLATDVQTVQAR                    | 1890.2             | 3            | 4.5458 | 0.4046 |
| LYKDDQLLDDGK                          | 1423.6             | 2            | 3.7828 | 0.3853 |
| LYKDDQLLDDGKTLGECGFTSQTARPQAPATVGLAFR | 3985.4             | 3            | 5.3978 | 0.3722 |
| LYKEELEQTYHAK                         | 1652.8             | 2            | 4.807  | 0.3175 |
| LYKEELEQTYHAKLENAR                    | 2236.5             | 3            | 5.053  | 0.3669 |
| LYKENEGKPENER                         | 1606.7             | 2            | 3.5751 | 0.3398 |
| LYKLELEQTYQAK                         | 1627.9             | 2            | 4.7249 | 0.3033 |
| LYKQLDDKDEEINQQSQLVEK                 | 2564.8             | 3            | 4.9285 | 0.2546 |

| Peptide Sequence                 | Peptide mass (m/z) | Charge State | Xcorr  | DelCn2 |
|----------------------------------|--------------------|--------------|--------|--------|
| LYKVPDGKPENQFAFNGEFK             | 2329.6             | 3            | 3.2895 | 0.1523 |
| LYLEDDDPVQAEAYINR                | 2025.2             | 2            | 5.6872 | 0.5113 |
| LYLINSPVVR                       | 1174.4             | 2            | 2.9047 | 0.1359 |
| LYLVDLAGSEK                      | 1208.4             | 2            | 3.7091 | 0.2759 |
| LYLVDLAGSEKVS                    | 1522.8             | 2            | 4.0367 | 0.3952 |
| LYLVFPHDSSALSNSFHHLQLFDQDSSNVVSR | 3662.0             | 3            | 4.1908 | 0.3628 |
| LYNKDAVIEFLDKSAEK                | 2097.4             | 3            | 4.5332 | 0.2889 |
| LYNLDFQYELYNPMALYGSVPVLLAHNPHR   | 3649.2             | 3            | 6.2935 | 0.4839 |
| LYNNITFEELGALLEIPAAK             | 2220.6             | 2            | 5.6613 | 0.4249 |
| LYNNITFEELGALLEIPAAKAEK          | 2548.9             | 2            | 5.0466 | 0.3744 |
| LYNTHLNK                         | 1003.1             | 2            | 2.7012 | 0.1072 |
| LYNTLDDLLLYINAR                  | 1811.1             | 3            | 4.4089 | 0.1933 |
| LYPAAVDTIVAIMAEGK                | 1763.1             | 2            | 2.5123 | 0.1784 |
| LYPAVDEQETPLPR                   | 1628.8             | 2            | 3.3277 | 0.3651 |
| LYPEGLAQLAR                      | 1231.4             | 2            | 2.9052 | 0.2406 |
| LYPVLLVKQDGGSTIHIR               | 1953.3             | 2            | 2.6925 | 0.3123 |
| LYQAGEGR                         | 894.0              | 2            | 2.8346 | 0.1855 |
| LYQPEYQEVSTEEQREEISGK            | 2543.7             | 2            | 3.5359 | 0.1444 |
| LYQQHGAGLFDVTR                   | 1605.8             | 3            | 4.1742 | 0.4169 |
| LYQTDPSGTYHAWK                   | 1667.8             | 2            | 4.2411 | 0.3798 |
| LYQVEYAFK                        | 1161.3             | 2            | 2.8584 | 0.155  |
| LYRPGSVAYVSR                     | 1368.6             | 2            | 3.3453 | 0.359  |
| LYRPPVLDALGR                     | 1467.7             | 2            | 2.8112 | 0.207  |
| LYSESLAR                         | 939.0              | 2            | 2.4649 | 0.1724 |
| LYSIILSAPIPEPK                   | 1541.9             | 2            | 3.311  | 0.2259 |
| LYSILGTTLKDEGK                   | 1538.8             | 2            | 3.8825 | 0.3856 |
| LYSILGTTLKDEGKLLEAK              | 2093.4             | 2            | 5.3387 | 0.4052 |
| LYSKDDEPAVK                      | 1265.4             | 2            | 2.5069 | 0.1031 |
| LYSLALHPNAFKR                    | 1530.8             | 2            | 2.4678 | 0.1456 |
| LYSNAYLNDLAGCIK                  | 1658.9             | 2            | 4.7297 | 0.4273 |
| LYSPSQIGAFVLMK                   | 1554.9             | 2            | 5.359  | 0.3974 |
| LYSSSDVIELTPSNFNR                | 2058.2             | 2            | 5.8569 | 0.5393 |
| LYSTWIGGSILASLDTFKK              | 2101.4             | 2            | 3.4363 | 0.4173 |
| LYTDFDEIRQEIENETER               | 2301.4             | 3            | 3.5437 | 0.2263 |
| LYTGKPNLVNGLQAR                  | 1644.9             | 2            | 2.752  | 0.1292 |
| LYTLVLTDPDAPSR                   | 1561.8             | 2            | 4.6108 | 0.4638 |

| Peptide Sequence                      | Peptide mass (m/z) | Charge State | Xcorr  | DelCn2 |
|---------------------------------------|--------------------|--------------|--------|--------|
| LYTLVLTDPDAPSRK                       | 1689.9             | 2            | 3.8899 | 0.2313 |
| LYTLVLTDPDAPSRKDPK                    | 2030.3             | 3            | 3.3738 | 0.3121 |
| LYTNGPLPDKLQQAR                       | 1714.9             | 2            | 3.2721 | 0.1957 |
| LYTVEYLSNMVGGR                        | 1602.8             | 2            | 3.4727 | 0.3271 |
| LYVELHRGEELGGGQDPVQLLSGFPR            | 2868.2             | 3            | 7.1896 | 0.4199 |
| LYVHEAVK                              | 959.1              | 2            | 2.408  | 0.1424 |
| LYVPHSLWPQIK                          | 1481.8             | 2            | 2.5914 | 0.1644 |
| LYYVCTAPHCGHR                         | 1520.8             | 2            | 2.5579 | 0.1845 |
| MAAADSQQQR                            | 1077.2             | 2            | 3.8045 | 0.3115 |
| MAAAGGGGGGGR                          | 919.0              | 2            | 2.633  | 0.1357 |
| MAAEEEEKR                             | 964.1              | 2            | 2.6601 | 0.1858 |
| MAAISESNINLCGSHCGVSIKEDGPSQMALEDLAMFR | 3856.4             | 3            | 6.0471 | 0.5145 |
| MAANVENPASADSEAYIEK                   | 2011.2             | 3            | 3.6848 | 0.1715 |
| MAAPIDRVGQTIER                        | 1557.8             | 2            | 2.9488 | 0.2324 |
| MADAILAIAGGQELLAR                     | 1827.2             | 3            | 4.7467 | 0.2519 |
| MADEAILQER                            | 1176.3             | 2            | 2.5784 | 0.1757 |
| MADFHKEEMDDQDKDK                      | 1983.1             | 3            | 4.5284 | 0.2502 |
| MADGVANVEHILK                         | 1397.6             | 2            | 4.0808 | 0.351  |
| MADKDGDLIATK                          | 1278.5             | 2            | 3.1367 | 0.1718 |
| MADLHAVPR                             | 1010.2             | 2            | 3.2444 | 0.3848 |
| MADSAASLEQQLEQVKLTLLQR                | 2473.8             | 3            | 4.8971 | 0.3506 |
| MAEAVQNHVK                            | 1127.3             | 2            | 3.4687 | 0.2954 |
| MAEEKLTHK                             | 1087.3             | 2            | 3.121  | 0.227  |
| MAEIGEHVAPSEAANSLEQAQAAAER            | 2681.9             | 3            | 5.1996 | 0.3414 |
| MAENLGFVGPLK                          | 1276.5             | 2            | 3.9767 | 0.3351 |
| MAENLGFVGPLKSQAADQITK                 | 2219.5             | 3            | 3.9727 | 0.3614 |
| MAETVDTSEMVNGATEQR                    | 1970.1             | 2            | 5.0762 | 0.4396 |
| MAFPLLDMDVLER                         | 1550.9             | 2            | 3.1043 | 0.2551 |
| MAGATPVFIPLR                          | 1273.6             | 2            | 3.4295 | 0.286  |
| MAGDETQPTR                            | 1106.2             | 2            | 3.2938 | 0.24   |
| MAGDPVANVR                            | 1030.2             | 2            | 2.5842 | 0.1485 |
| MAGNEYVGFSNATFQSER                    | 2009.1             | 2            | 5.3986 | 0.4719 |
| MAGTAFDFENMK                          | 1362.6             | 2            | 3.5572 | 0.3341 |
| MAGTAFDFENMKR                         | 1518.7             | 2            | 4.128  | 0.4419 |
| MAHGYGEESEEEER                        | 1524.6             | 2            | 3.7985 | 0.4704 |
| MAHGYGEESEEEERGLEPGK                  | 2106.2             | 2            | 5.7804 | 0.5049 |

| Peptide Sequence                | Peptide mass (m/z) | Charge State | Xcorr  | DelCn2 |
|---------------------------------|--------------------|--------------|--------|--------|
| MAIQTQQSK                       | 1035.2             | 2            | 2.7771 | 0.1473 |
| MAISDLQGAVGNQIK                 | 1545.8             | 2            | 2.42   | 0.1187 |
| MALDIEIATYR                     | 1296.5             | 2            | 4.1664 | 0.2707 |
| MALDIEIATYRK                    | 1424.7             | 2            | 3.408  | 0.261  |
| MALEVGDYK                       | 1026.2             | 2            | 2.9646 | 0.2537 |
| MALEVGDYKINLK                   | 1494.8             | 2            | 3.4519 | 0.2895 |
| MALIGLGVSHPVLK                  | 1435.8             | 2            | 3.9445 | 0.4828 |
| MALIQMGSVEEAVQALIDLHNHDLGENHHLR | 3492.9             | 3            | 5.4861 | 0.2606 |
| MALLMAEMSR                      | 1153.5             | 2            | 3.3306 | 0.2274 |
| MALVLEALPQIAAK                  | 1468.8             | 2            | 4.1222 | 0.3695 |
| MAMLQEEPVIVKPMPGKPNTQNPPR       | 2804.3             | 3            | 3.8059 | 0.2321 |
| MANRDLLSSVSR                    | 1349.5             | 2            | 2.9332 | 0.1551 |
| MAPALSGANLTSPR                  | 1386.6             | 2            | 2.842  | 0.19   |
| MAPTPIPTRSPSDSSTASTPVAEQIER     | 2828.1             | 3            | 5.8822 | 0.4299 |
| MAPVPLDDSNRPASLTK               | 1813.1             | 2            | 3.0658 | 0.3092 |
| MAPYQGPDAVPGALDYK               | 1794.0             | 2            | 4.8826 | 0.4803 |
| MAPYQGPDAVPGALDYKSFSTALYGESDL   | 3065.4             | 3            | 3.6252 | 0.137  |
| MAQALEELR                       | 1061.2             | 2            | 3.7282 | 0.1159 |
| MAQALEELRSQHDEQVR               | 2041.2             | 3            | 4.1023 | 0.2855 |
| MAQEVLTHLKEHPDAWTR              | 2163.4             | 3            | 3.9662 | 0.3529 |
| MAQFDAKK                        | 939.1              | 2            | 2.5895 | 0.1234 |
| MAQFDAKKFAETQPK                 | 1741.0             | 3            | 3.5483 | 0.2027 |
| MAQLLDLSVDESEAFSLNLVVNK         | 2536.9             | 2            | 4.2069 | 0.3924 |
| MAQSSSKSPELLAR                  | 1505.7             | 2            | 3.6845 | 0.319  |
| MASEREGSGSSGTGEQKEDQKEEKQ       | 2713.8             | 3            | 4.1982 | 0.3567 |
| MASGAANVVGPK                    | 1102.3             | 2            | 3.5354 | 0.301  |
| MASGRWAPLGPAWASRRPLQAQIVPK      | 2846.4             | 3            | 3.7314 | 0.2354 |
| MASNIFGPTEEPQNIPK               | 1874.1             | 2            | 3.6025 | 0.1145 |
| MASTPHPPGAR                     | 1122.3             | 2            | 3.1643 | 0.4372 |
| MATEVAADALGEEWKGYVVR            | 2196.5             | 2            | 5.235  | 0.5211 |
| MATHTLITGLEEYVR                 | 1735.0             | 2            | 2.5313 | 0.3088 |
| MATNAAAQNAIK                    | 1204.4             | 2            | 2.7235 | 0.1882 |
| MATNAAAQNAIKK                   | 1332.6             | 2            | 3.6014 | 0.2364 |
| MATNFLAHEK                      | 1162.3             | 2            | 2.888  | 0.3396 |
| MATQASTLYSNNITK                 | 1643.8             | 2            | 5.5314 | 0.4514 |
| MATRPPDRPEGPHTSR                | 1806.0             | 2            | 2.6224 | 0.1541 |

| Peptide Sequence                        | Peptide mass (m/z) | Charge State | Xcorr  | DelCn2 |
|-----------------------------------------|--------------------|--------------|--------|--------|
| MATYLTGELTATSEDYKLLNMNKLTSLK            | 3280.8             | 3            | 3.93   | 0.1733 |
| MAVDQDWPSVYPVAAPFKPSAVPLPVR             | 2939.4             | 3            | 5.2533 | 0.3104 |
| MAVEDHLKTEEELSEEKQILNEMLEVVEQR          | 3601.0             | 3            | 5.6239 | 0.3867 |
| MAVTFIGNSTAIQELFK                       | 1871.2             | 2            | 5.9076 | 0.4218 |
| MAVTFIGNSTAIQELFKR                      | 2027.4             | 3            | 4.713  | 0.2935 |
| MDAEHPELR                               | 1098.2             | 2            | 3.0168 | 0.2502 |
| MDAILTEAIK                              | 1105.3             | 2            | 2.5469 | 0.1312 |
| MDAPASAAAVR                             | 1060.2             | 2            | 2.4153 | 0.2093 |
| MDAPTSAAVTR                             | 1120.3             | 2            | 2.7131 | 0.1182 |
| MDATANDVPSDR                            | 1292.4             | 2            | 4.2625 | 0.4212 |
| MDATANDVPSPYEVR                         | 1665.8             | 2            | 5.2783 | 0.3332 |
| MDCQECPEGYRVTYTPMAPGSYLISIK             | 3054.5             | 3            | 4.6938 | 0.2127 |
| MDDKSPHEEYR                             | 1506.6             | 2            | 3.0903 | 0.146  |
| MDDVINISGHR                             | 1257.4             | 3            | 3.8934 | 0.3333 |
| MDELQLFR                                | 1052.2             | 2            | 3.3065 | 0.2301 |
| MDELQLFRGDTVLLK                         | 1779.1             | 2            | 3.7668 | 0.2417 |
| MDEQKNHHQQQVDSIIKEHEVSIQR               | 3058.3             | 3            | 5.0333 | 0.3042 |
| MDETDASSAVK                             | 1154.2             | 2            | 2.9639 | 0.283  |
| MDGGSGGLGSGDNAPTTEALFVALGAGVTALSHPLLYVK | 3746.2             | 3            | 4.9823 | 0.4246 |
| MDKEETKDWILPSDYDHAEAEAR                 | 2750.9             | 3            | 5.2796 | 0.3352 |
| MDKLEAEKR                               | 1120.3             | 2            | 2.5036 | 0.1182 |
| MDKNASTFEDVTQVSSAYQK                    | 2250.4             | 2            | 6.8047 | 0.484  |
| MDKSAVGHEYQSK                           | 1480.6             | 2            | 3.5534 | 0.3781 |
| MDKSNEELR                               | 1122.2             | 2            | 2.4511 | 0.1114 |
| MDKVEDELKEK                             | 1364.5             | 2            | 3.3958 | 0.2102 |
| MDLAPSKDMGPPKENK                        | 1759.0             | 2            | 3.225  | 0.2726 |
| MDLEKPNYIVPDYMPVVYDKLPQPPSHR            | 3343.9             | 3            | 4.665  | 0.2325 |
| MDLLPLHMGLHK                            | 1405.8             | 2            | 3.3707 | 0.3287 |
| MDLNSEQAEQLER                           | 1563.7             | 2            | 5.0327 | 0.3317 |
| MDLTAKELTEEKESAFEFLSSA                  | 2477.7             | 2            | 4.4339 | 0.4479 |
| MDPEGSKLLDDAMAADKSDEWFAK                | 2671.9             | 3            | 4.0953 | 0.2942 |
| MDPMNIWDDIITNR                          | 1735.0             | 2            | 3.7465 | 0.3047 |
| MDQGVGLVLQELR                           | 1458.7             | 2            | 3.8184 | 0.2822 |
| MDQYFNQMEK                              | 1334.5             | 2            | 3.8616 | 0.3776 |
| MDSFDEDLARPSGLLAQER                     | 2151.3             | 3            | 3.4958 | 0.3609 |
| MDSTANEVEAVK                            | 1294.4             | 2            | 4.1105 | 0.3021 |

| Peptide Sequence                     | Peptide mass (m/z) | Charge State | Xcorr  | DelCn2 |
|--------------------------------------|--------------------|--------------|--------|--------|
| MDSTANEVEAVKVHSFPTLK                 | 2204.5             | 2            | 4.8146 | 0.4924 |
| MDTDLETMDLDQGGEALAPR                 | 2179.4             | 2            | 4.4917 | 0.346  |
| MDYPKQTQVSVLPEGGETPLFK               | 2465.8             | 2            | 5.1613 | 0.4203 |
| MDYPKQTQVSVLPEGGETPLFKQFFK           | 3016.5             | 3            | 4.5998 | 0.2893 |
| MEAGLSELSGSVAQTVTQLQTTLASVQELLIQQQK  | 3860.3             | 3            | 4.0122 | 0.2047 |
| MEANKENR                             | 992.1              | 2            | 2.5878 | 0.1362 |
| MEATGVLPFVR                          | 1220.5             | 2            | 2.6853 | 0.2048 |
| MEDTEPFSAEILLSAMMR                   | 1959.3             | 2            | 2.876  | 0.3098 |
| MEEDPDDVPHGHITSLAVKR                 | 2247.5             | 3            | 3.9154 | 0.2785 |
| MEEEEILLLEDQNSK                      | 1691.9             | 2            | 3.9464 | 0.1659 |
| MEEESGAPGVPSGNGAPGPK                 | 1869.0             | 2            | 3.8193 | 0.4002 |
| MEELHNQEMQK                          | 1417.6             | 2            | 4.1818 | 0.2443 |
| MEELHNQEVQKR                         | 1541.7             | 2            | 4.2801 | 0.2797 |
| MEELKEGLR                            | 1105.3             | 2            | 2.6595 | 0.1602 |
| MEELNSEKHR                           | 1273.4             | 2            | 2.4757 | 0.1972 |
| MEEVEAMLLPETLKR                      | 1790.1             | 2            | 4.0514 | 0.3479 |
| MEEVHKEANSVLQWLESKEEVLK              | 2757.1             | 3            | 4.0575 | 0.1744 |
| MEEVKEANIR                           | 1219.4             | 2            | 2.8392 | 0.1911 |
| MEEVYLPDNINEGQVQVR                   | 2134.4             | 2            | 2.9176 | 0.153  |
| MEGDIDKQR                            | 1092.2             | 2            | 2.8531 | 0.1737 |
| MEGGTENDLR                           | 1122.2             | 2            | 2.9419 | 0.2881 |
| MEIATKDPLNPIKQDVK                    | 1941.3             | 3            | 5.2486 | 0.3459 |
| MEIATKDPLNPIKQDVKK                   | 2069.5             | 3            | 4.0315 | 0.3859 |
| MEIATKEPMNPIKQYVK                    | 2021.4             | 3            | 3.4183 | 0.1319 |
| MEIGLPDEKGR                          | 1245.4             | 2            | 3.1508 | 0.1541 |
| MEIVDHALHALTDEVIIPHSGWER             | 2770.1             | 2            | 2.961  | 0.185  |
| MEKEYGSLKDSTK                        | 1516.7             | 3            | 3.7607 | 0.3307 |
| MEKGEHSIVYLLKPSYAFGSVGK              | 2428.8             | 3            | 6.5635 | 0.4449 |
| MEKGEHSIVYLLKPSYAFGSVGKEK            | 2686.1             | 3            | 3.6555 | 0.136  |
| MEKYVISSSHTPELAR                     | 1978.2             | 3            | 4.5567 | 0.3532 |
| MELLAHLLGEK                          | 1254.5             | 2            | 3.5211 | 0.2483 |
| MELLHPLGLDSPIAGFLQK                  | 2080.5             | 2            | 4.3833 | 0.2687 |
| MELQEIQLK                            | 1132.4             | 2            | 2.6561 | 0.1108 |
| MENILSGNPLLNLTGPSQPQANFK             | 2584.9             | 3            | 3.2143 | 0.1125 |
| MENKPTSSELQK                         | 1392.6             | 2            | 3.4067 | 0.2185 |
| MEPAGSQGVWGLDDFQFLPFIWGSSQLIDHPYLEPR | 4135.6             | 3            | 4.2185 | 0.3089 |



| Peptide Sequence                   | Peptide mass (m/z) | Charge State | Xcorr  | DelCn2 |
|------------------------------------|--------------------|--------------|--------|--------|
| MEPENKYLPELMAEKDSLDPSTHAMQLLTAEIEK | 4051.6             | 3            | 3.5611 | 0.2502 |
| MEPLNNLQVAVK                       | 1356.6             | 2            | 3.2361 | 0.2291 |
| MEPLWTGFWPAPSLSLGVPLHR             | 2492.9             | 3            | 3.2429 | 0.143  |
| MESALDQLK                          | 1035.2             | 2            | 2.9243 | 0.1568 |
| MESEEGKEAR                         | 1166.2             | 2            | 3.3885 | 0.2051 |
| MESPIPLPLPTPDAETEKLR               | 2461.9             | 3            | 3.8399 | 0.2246 |
| MESQLSASKPTGGLPETAR                | 1961.2             | 3            | 3.6883 | 0.1727 |
| METKTESSGIETEPTVHHLPLSTEK          | 2783.1             | 3            | 5.3655 | 0.5008 |
| METTHSFGNPSISVSTQQPPKK             | 2402.7             | 3            | 6.0561 | 0.4611 |
| MEVGPTMVGDEQSDPELMQHLGASK          | 2688.0             | 3            | 4.0605 | 0.2977 |
| MEVQEQEEDISSLIR                    | 1807.0             | 2            | 2.9319 | 0.1737 |
| MFADDLHNLNKR                       | 1474.7             | 2            | 3.3797 | 0.3541 |
| MFADYLAHESR                        | 1340.5             | 2            | 3.7808 | 0.4321 |
| MFDKNLQDLVR                        | 1379.6             | 2            | 3.5717 | 0.3031 |
| MGDYTDDEPGVMPGSHSVER               | 2367.6             | 2            | 4.0752 | 0.328  |
| MFEELGQR                           | 1010.1             | 2            | 2.4079 | 0.2208 |
| MFEIDYSR                           | 1061.2             | 2            | 2.6467 | 0.1716 |
| MFEIVFEDPKIPGEK                    | 1780.1             | 2            | 3.6811 | 0.3087 |
| MFESFIESVPLLK                      | 1540.8             | 2            | 4.4065 | 0.4341 |
| MFGGPGTASR                         | 981.1              | 2            | 2.6394 | 0.3598 |
| MFGGPGTASRPSSSR                    | 1495.6             | 2            | 2.6244 | 0.2499 |
| MFGIDRDAIAQAVR                     | 1563.8             | 3            | 4.1998 | 0.3526 |
| MFGIPVVAVNAFKTDTESELDLISR          | 2853.3             | 3            | 5.021  | 0.3707 |
| MFIGGLSWDTSKK                      | 1470.7             | 2            | 3.5653 | 0.2203 |
| MFIGGLSWDTTK                       | 1356.6             | 2            | 2.8877 | 0.1643 |
| MFIGGLSWDTTKK                      | 1484.7             | 2            | 3.8619 | 0.2483 |
| MFIGGLSWDTTKKDLKDYFSK              | 2481.9             | 3            | 3.6768 | 0.2911 |
| MFILSDGEGKNGTIELMEPLDEEISGIVEVVGR  | 3579.1             | 3            | 5.0784 | 0.3741 |
| MFKQFNKLTEDKADVQSIIGLQR            | 2711.1             | 3            | 3.9919 | 0.295  |
| MFLEGFRLPGEAQK                     | 1623.9             | 2            | 2.9977 | 0.1928 |
| MFLGDNAHLSIINEYLSQSYQK             | 2572.9             | 3            | 4.3    | 0.2412 |
| MFLLVGAPK                          | 976.3              | 2            | 3.0174 | 0.1393 |
| MFLQYYLNEQGDRVYTLK                 | 2282.6             | 3            | 3.8227 | 0.3639 |
| MFNAENGGK                          | 911.0              | 2            | 2.6188 | 0.1424 |
| MFNGEKINYTEGR                      | 1559.7             | 2            | 4.2638 | 0.4763 |
| MFQDIGVSKDLNEQFKK                  | 2028.3             | 3            | 3.3173 | 0.1636 |

| Peptide Sequence                   | Peptide mass (m/z) | Charge State | Xcorr  | DelCn2 |
|------------------------------------|--------------------|--------------|--------|--------|
| MFTAGIDLMDMASDILQPK                | 2098.5             | 2            | 5.5981 | 0.5518 |
| MFTAGIDLMDMASDILQPKGDDVAR          | 2712.1             | 3            | 4.9622 | 0.4449 |
| MFTNPDNGSPAMTHR                    | 1676.9             | 2            | 4.4859 | 0.4105 |
| MFTQQQPQELAR                       | 1477.7             | 2            | 4.4485 | 0.3762 |
| MFVGGLSWDTSKK                      | 1456.7             | 2            | 3.4636 | 0.3523 |
| MFVGQVPR                           | 934.1              | 2            | 2.7708 | 0.2005 |
| MFVLDEADEMLSR                      | 1556.8             | 2            | 4.964  | 0.3165 |
| MGAGLGHGMDR                        | 1102.3             | 2            | 3.6593 | 0.4107 |
| MGAGLGHGMDRVGSEIER                 | 1873.1             | 2            | 3.4615 | 0.275  |
| MGAGMGFGLER                        | 1126.3             | 2            | 3.6348 | 0.4321 |
| MGANNLER                           | 905.0              | 2            | 2.5499 | 0.118  |
| MGANSLER                           | 878.0              | 2            | 2.809  | 0.2403 |
| MGAPESGLAEYLFDK                    | 1628.8             | 2            | 4.0164 | 0.3787 |
| MGAPESGLAEYLFDKHTLGSDNES           | 2684.8             | 2            | 4.5072 | 0.3964 |
| MGATKADFNTVAIHPTSSEELVTLR          | 2805.1             | 2            | 5.4752 | 0.5101 |
| MGAVFMDAPVSGGVGAAR                 | 1694.0             | 2            | 5.1429 | 0.5083 |
| MGAYHTIELEPNRQFTLAK                | 2220.5             | 2            | 3.8857 | 0.2342 |
| MGDEGGESELLGEDLPLEPSVTKAER         | 2760.0             | 3            | 4.1801 | 0.2457 |
| MGDHLTNLHR                         | 1194.3             | 2            | 3.2339 | 0.2779 |
| MGDNNVIESK                         | 1107.2             | 2            | 3.4239 | 0.3284 |
| MGEDMHTIGFGIYEVPEELSGQTNIHLSK      | 3234.6             | 3            | 4.4113 | 0.2781 |
| MGESDDSilR                         | 1123.2             | 2            | 3.7974 | 0.3573 |
| MGFPPGAAQALVLQVFK                  | 1775.2             | 2            | 2.622  | 0.2253 |
| MGFPPNIVESAAENMVK                  | 1835.1             | 2            | 3.2776 | 0.3768 |
| MGFTEVTPVTGASLR                    | 1566.8             | 2            | 3.5645 | 0.3884 |
| MGGDIANR                           | 833.9              | 2            | 2.4197 | 0.1055 |
| MGGEAPELALDPVPQDASTK               | 2027.2             | 2            | 5.6437 | 0.4817 |
| MGGEDDELKGLLGLPEEETELDNLTEFNTHANKR | 3817.1             | 3            | 4.8897 | 0.2569 |
| MGGEEKPIGAGEEK                     | 1432.6             | 2            | 3.8695 | 0.2683 |
| MGGEEKPIGAGEEKQK                   | 1688.9             | 3            | 4.6598 | 0.3715 |
| MGGFHWMQR                          | 1150.4             | 2            | 3.2672 | 0.293  |
| MGGGKGAIHYVTPVK                    | 1630.9             | 2            | 4.4396 | 0.2282 |
| MGGMEGPFGGGMENMGR                  | 1716.0             | 2            | 4.5813 | 0.4746 |
| MGGSSGALYGLFLTAAAQPLK              | 2054.4             | 2            | 3.646  | 0.2962 |
| MGHAGAIAGGK                        | 1083.3             | 1            | 3.7259 | 0.4313 |
| MGHALEEIKK                         | 1156.4             | 2            | 2.9129 | 0.1756 |

| Peptide Sequence                    | Peptide mass (m/z) | Charge State | Xcorr  | DelCn2 |
|-------------------------------------|--------------------|--------------|--------|--------|
| MGIGGLDKEFSDIFR                     | 1685.9             | 2            | 4.6486 | 0.4254 |
| MGIGGLDKEFSDIFRR                    | 1842.1             | 3            | 3.6778 | 0.3834 |
| MGIVGPEFKDKLLSAER                   | 1891.2             | 2            | 3.6499 | 0.4192 |
| MGIVSDYEKIR                         | 1311.5             | 2            | 2.7237 | 0.2021 |
| MGKIDIDYQK                          | 1211.4             | 2            | 2.7132 | 0.2792 |
| MGKIDIDYQKLHDAFFK                   | 2070.4             | 2            | 3.5096 | 0.2181 |
| MGLAMGGGGGASFDR                     | 1384.6             | 2            | 4.0245 | 0.3912 |
| MGLKDTPTQEDWLVSVLPEGSR              | 2459.8             | 2            | 4.2926 | 0.3327 |
| MGLLAVLR                            | 873.1              | 2            | 2.9771 | 0.1389 |
| MGLVDQLVEPLGPGPKPPEER               | 2275.7             | 3            | 4.8341 | 0.3497 |
| MGLVDQLVEPLGPGPKPPEERTIEYLEEVAITFAK | 3884.5             | 3            | 3.8784 | 0.1816 |
| MGMTEDDKR                           | 1083.2             | 2            | 2.8263 | 0.3329 |
| MGMYPGVLVPSSR                       | 1394.7             | 2            | 3.406  | 0.4166 |
| MNGTVVR                             | 834.0              | 2            | 2.9861 | 0.2368 |
| MGNKPHMIQVYR                        | 1474.8             | 3            | 3.6196 | 0.2698 |
| MGNTPDSASDNLGFR                     | 1582.7             | 2            | 4.6608 | 0.4625 |
| MGPAMGPALGAGIER                     | 1428.7             | 2            | 3.3579 | 0.256  |
| MGPFLNAVR                           | 1118.4             | 2            | 3.1553 | 0.3473 |
| MGPGAASGGERP NLK                    | 1442.6             | 2            | 4.4364 | 0.3478 |
| MGPGATAGGAEK                        | 1047.2             | 2            | 3.3363 | 0.353  |
| MGPGATAGGAEKSNVK                    | 1475.7             | 2            | 4.3593 | 0.4021 |
| MGPGIGAILER                         | 1114.3             | 2            | 3.1519 | 0.1526 |
| MGPLGLDHMASSIER                     | 1614.9             | 3            | 4.7852 | 0.4493 |
| MGPLINRPHLER                        | 1433.7             | 2            | 2.5789 | 0.1749 |
| MGPNIYELR                           | 1093.3             | 2            | 3.2726 | 0.311  |
| MGPPVGGHR                           | 908.1              | 2            | 2.7847 | 0.3685 |
| MGPSGGEGMEPERR                      | 1490.6             | 2            | 2.5786 | 0.1644 |
| MGPVMDR                             | 806.0              | 2            | 2.7468 | 0.1067 |
| MGQMAMGGAMGINNR                     | 1539.9             | 2            | 4.6244 | 0.4348 |
| MGQPSDPTAVVDPQTR                    | 1699.9             | 2            | 3.418  | 0.3072 |
| MGQRPAAGAEVPEVFLHLGR                | 2223.5             | 3            | 5.2271 | 0.3225 |
| MGRGPGPLQER                         | 1198.4             | 2            | 2.533  | 0.1754 |
| MGVDKIIPVDK                         | 1215.5             | 2            | 3.0026 | 0.2185 |
| MGVDKIIPVDKLVK                      | 1556.0             | 2            | 4.1651 | 0.2712 |
| MGVGKLEMYVLNPVK                     | 1679.1             | 3            | 4.3868 | 0.2601 |
| MGVITVSLAGLVSAR                     | 1531.8             | 2            | 4.3247 | 0.4467 |

| Peptide Sequence                  | Peptide mass (m/z) | Charge State | Xcorr  | DelCn2 |
|-----------------------------------|--------------------|--------------|--------|--------|
| MGYAEAPYDAIHVGAAAPVVPQALIDQLKPGGR | 3507.0             | 3            | 6.4546 | 0.5307 |
| MGYMDPR                           | 870.0              | 2            | 2.4366 | 0.2508 |
| MHAAYIRPGGVHQDLPLGLMDDIYQFSK      | 3174.6             | 3            | 4.2888 | 0.308  |
| MHAPPINMESVHMK                    | 1623.0             | 3            | 3.636  | 0.312  |
| MHDLNTDQENLVGTHDAPIR              | 2277.5             | 3            | 6.1032 | 0.4714 |
| MHEDINEEWISDKTR                   | 1904.1             | 2            | 5.397  | 0.4307 |
| MHELQSKVEDLQR                     | 1613.8             | 2            | 2.541  | 0.1044 |
| MHEVSFQDKEKEHLTR                  | 2015.2             | 3            | 3.3567 | 0.181  |
| MHFESGSTLKK                       | 1265.5             | 3            | 3.565  | 0.2324 |
| MHGGTGFAGIDSSSPEVK                | 1777.9             | 2            | 5.7175 | 0.5502 |
| MHITDMKPLPHLPGLEDLGIQATPLELK      | 3012.6             | 3            | 3.8262 | 0.2176 |
| MHLAGKTEQAK                       | 1214.4             | 2            | 2.9737 | 0.2554 |
| MHLGLVIPK                         | 1008.3             | 2            | 2.9566 | 0.2738 |
| MHLSQIQR                          | 1013.2             | 2            | 2.6448 | 0.1115 |
| MHNQIPQVTSKGK                     | 1611.8             | 2            | 4.0464 | 0.3977 |
| MHQVMSIEEVER                      | 1488.7             | 2            | 2.7881 | 0.2826 |
| MHSPQTSAMLFTVDNEAGK               | 2065.3             | 3            | 4.319  | 0.4225 |
| MHSPQTSAMLFTVDNEAGKITCLCQVPQNAANR | 3578.1             | 3            | 5.495  | 0.3905 |
| MHTTFEHDIQALGTQVR                 | 1985.2             | 3            | 5.0735 | 0.5153 |
| MHVEHER                           | 938.0              | 2            | 2.574  | 0.2845 |
| MHVQLSTSR                         | 1059.2             | 2            | 2.9081 | 0.24   |
| MIAGQVLDINLAAEPK                  | 1684.0             | 2            | 5.264  | 0.338  |
| MIAGQVLDINLAAEPKVNR               | 2053.4             | 2            | 4.1277 | 0.3408 |
| MIASDSHRPEVK                      | 1370.6             | 2            | 3.9817 | 0.3085 |
| MIDERQQELTHQEHR                   | 1951.1             | 3            | 4.0887 | 0.2842 |
| MIDKNLREDGEK                      | 1448.6             | 2            | 3.6298 | 0.242  |
| MIDLIIPR                          | 971.2              | 2            | 2.9288 | 0.1795 |
| MIDVDSLTDKECDWLNNYHLTCR           | 2786.1             | 3            | 3.8184 | 0.1402 |
| MIETAQVDER                        | 1192.3             | 2            | 3.7187 | 0.3599 |
| MIINEELMASLDQPTQTVMHR             | 2558.0             | 3            | 4.2886 | 0.2026 |
| MIYRDLISHDEMFSDIYK                | 2390.8             | 3            | 3.5745 | 0.1647 |
| MIKNEVDMQVLHLLGPK                 | 1966.4             | 3            | 4.9509 | 0.3735 |
| MIKPPFHSLSEK                      | 1464.8             | 2            | 4.1655 | 0.3703 |
| MIKPREGEETLRIEDILEVIEK            | 2642.1             | 3            | 4.2463 | 0.1278 |
| MILIQDGSQNTNVDKPLR                | 2043.3             | 2            | 5.0198 | 0.3753 |
| MILKIDDIRKPGESE                   | 1874.1             | 2            | 4.0828 | 0.2055 |

| Peptide Sequence             | Peptide mass (m/z) | Charge State | Xcorr  | DelCn2 |
|------------------------------|--------------------|--------------|--------|--------|
| MILLEVNNR                    | 1102.3             | 2            | 2.99   | 0.1314 |
| MILTFEKR                     | 1038.3             | 2            | 2.625  | 0.1952 |
| MIMATNRPDTLDPALLRPGR         | 2239.7             | 3            | 3.2239 | 0.1975 |
| MIMQDKLEK                    | 1136.4             | 2            | 2.8957 | 0.1579 |
| MIMQDKLEKER                  | 1421.7             | 2            | 3.2566 | 0.1649 |
| MINLSEPDITDER                | 1533.7             | 2            | 4.2372 | 0.2159 |
| MINLSVPDITDER                | 1503.7             | 2            | 3.9911 | 0.3009 |
| MINTDLSR                     | 950.1              | 1            | 2.488  | 0.2369 |
| MIPCDFLIPVQTQHPIRK           | 2137.6             | 2            | 3.658  | 0.3074 |
| MIQDGKGDVTITNDGATILK         | 2091.4             | 3            | 5.4583 | 0.3773 |
| MISDAIPELK                   | 1117.3             | 2            | 3.1163 | 0.1873 |
| MISDLIAGGIQPLQNLSVLK         | 2111.5             | 2            | 5.6722 | 0.2903 |
| MISEIDKEGTGK                 | 1308.5             | 2            | 3.1389 | 0.1939 |
| MISEIDKEGTGKMNFQDFLTVMTQK    | 2822.3             | 3            | 4.3486 | 0.3358 |
| MITAKPGKTPIQVLHEYGMK         | 2243.7             | 3            | 3.3814 | 0.1411 |
| MITSAAGIISLLDEDEPQLKEFALHK   | 2871.3             | 3            | 4.3342 | 0.3409 |
| MIVDPVEPHGEMK                | 1482.8             | 2            | 3.1198 | 0.258  |
| MIYASSK                      | 800.0              | 1            | 2.4819 | 0.1184 |
| MIYASSKDAIK                  | 1227.5             | 2            | 3.3093 | 0.3149 |
| MIYASSKDAIKK                 | 1355.6             | 2            | 3.1781 | 0.2385 |
| MKAEFFADVVP AVR              | 1580.9             | 2            | 2.5463 | 0.1203 |
| MKDKYTPVPDTPILIRAK           | 2087.5             | 2            | 2.6067 | 0.108  |
| MKDSYIEVLLPLGSEPELR          | 2190.5             | 2            | 2.9954 | 0.3036 |
| MKEALLSIGK                   | 1090.4             | 2            | 3.1795 | 0.1461 |
| MKEAQLEAEVK                  | 1276.5             | 2            | 2.9155 | 0.1223 |
| MKEEEQAGK                    | 1050.2             | 2            | 2.7164 | 0.1399 |
| MKEEVPTALVEAHVR              | 1710.0             | 2            | 5.4808 | 0.416  |
| MKEGENNKPR                   | 1203.4             | 2            | 3.0543 | 0.2362 |
| MKEIAEAYLGK                  | 1253.5             | 1            | 2.9952 | 0.16   |
| MKEIAEAYLGYPTNAVITVPAYFNDSQR | 3262.7             | 2            | 5.415  | 0.48   |
| MKELAGMFLSEDFLLFR            | 2404.8             | 3            | 5.5392 | 0.4278 |
| MKELSQDSTGR                  | 1252.4             | 2            | 3.6897 | 0.3077 |
| MKENAEAYLGK                  | 1254.4             | 2            | 3.6586 | 0.1304 |
| MKETAEAYLGKK                 | 1369.6             | 3            | 5.0021 | 0.3784 |
| MKETAENYLGHTAK               | 1593.8             | 2            | 4.7183 | 0.4252 |
| MKETAVFINISR                 | 1409.7             | 2            | 3.5864 | 0.2523 |

| Peptide Sequence                  | Peptide mass (m/z) | Charge State | Xcorr  | DelCn2 |
|-----------------------------------|--------------------|--------------|--------|--------|
| MKETIMNQEK                        | 1252.5             | 2            | 3.2428 | 0.1622 |
| MKETLQNVK                         | 1119.3             | 2            | 3.0343 | 0.1014 |
| MKEYGEQIDPSTHR                    | 1691.8             | 2            | 4.3093 | 0.2859 |
| MKEYGEQIDPSTHRK                   | 1820.0             | 2            | 3.6928 | 0.3221 |
| MKFNPFVTSDR                       | 1342.5             | 2            | 3.4821 | 0.2355 |
| MKFQYKEDHPFEYR                    | 1919.2             | 3            | 3.5    | 0.2314 |
| MKFVYKEEHPFEK                     | 1713.0             | 2            | 4.7872 | 0.3166 |
| MKGDYFR                           | 917.1              | 1            | 2.4832 | 0.1861 |
| MKGDYHR                           | 907.0              | 2            | 2.6184 | 0.1512 |
| MKGEAEDILETEK                     | 1493.7             | 2            | 4.1379 | 0.3644 |
| MKGEAEDILETEKSKLQLPR              | 2316.7             | 3            | 4.7327 | 0.3327 |
| MKGFDFVFNALDLMENK                 | 1873.2             | 2            | 3.0894 | 0.2514 |
| MKGNFTLPEVAECFDEITYVELQKEEAQK     | 3391.8             | 3            | 3.4856 | 0.1516 |
| MKGNVDISAPK                       | 1160.4             | 2            | 3.1328 | 0.2413 |
| MKGTFFVER                         | 968.2              | 2            | 2.476  | 0.101  |
| MKGVNSYPSLFIFR                    | 1660.0             | 2            | 3.8429 | 0.3314 |
| MKGYNPAEVGAAGK                    | 1393.6             | 2            | 3.3656 | 0.3394 |
| MKHYEVEILDAK                      | 1476.7             | 2            | 4.3412 | 0.3451 |
| MKKFEEDLLLLLEDQNSK                | 2081.4             | 3            | 3.6445 | 0.2017 |
| MKKFEEDLLLLLEDQNSKLSK             | 2409.8             | 3            | 5.3557 | 0.2922 |
| MKKKEPVGDDDESVPENVLSFDDLTADALANLK | 3490.9             | 3            | 5.8529 | 0.4163 |
| MKKRVVSIVEADPLPNNAVIHNSWIDPK      | 3172.7             | 3            | 3.2835 | 0.1053 |
| MKLDYILGLK                        | 1194.5             | 2            | 2.9088 | 0.1469 |
| MKLNISFPATGCQK                    | 1538.9             | 2            | 3.9609 | 0.2156 |
| MKLNTQEIFDDWAR                    | 1768.0             | 2            | 4.5331 | 0.4455 |
| MKLPIFIADAFTAR                    | 1594.9             | 3            | 3.9972 | 0.3479 |
| MKLPQFGISTPGSDLHVNAK              | 2141.5             | 3            | 3.9743 | 0.2779 |
| MKLSDFNDITNMLLLK                  | 1897.3             | 2            | 3.9517 | 0.1555 |
| MKLTDSVLR                         | 1063.3             | 2            | 2.6594 | 0.1083 |
| MKLTEDPEKQTLPGSK                  | 1803.1             | 2            | 3.6066 | 0.2276 |
| MKNLIPFDQMTIEDLNEAFPETK           | 2726.1             | 3            | 4.0663 | 0.1249 |
| MKNSCIVCNMGHSNTEIDVTSR            | 2553.9             | 3            | 3.7812 | 0.2941 |
| MKNYNKPWEPK                       | 1435.7             | 2            | 2.6778 | 0.1451 |
| MKPILLQGHER                       | 1322.6             | 2            | 3.148  | 0.3044 |
| MKPLMGVIYVPLTDKEK                 | 1963.4             | 3            | 4.5706 | 0.3983 |
| MKPLVVFVLGGPGAGK                  | 1571.0             | 2            | 4.7699 | 0.3965 |

| Peptide Sequence                             | Peptide mass (m/z) | Charge State | Xcorr  | DelCn2 |
|----------------------------------------------|--------------------|--------------|--------|--------|
| MKQDAQVVLYR                                  | 1351.6             | 2            | 3.5163 | 0.2869 |
| MKQEEQLQR                                    | 1190.4             | 2            | 3.1805 | 0.1645 |
| MKQELEAEYLAIFFK                              | 1842.2             | 3            | 4.5619 | 0.258  |
| MKQELEAEYLAVFFK                              | 1828.2             | 2            | 3.9645 | 0.3432 |
| MKQELSSELSTLLSSLSR                           | 2010.3             | 2            | 2.7724 | 0.2624 |
| MKQEPVKPEEGR                                 | 1428.6             | 2            | 3.7329 | 0.3203 |
| MKQEPVKPEEGRDMANR                            | 2016.3             | 2            | 4.0171 | 0.3962 |
| MKQVAEEAAR                                   | 1133.3             | 2            | 3.3694 | 0.279  |
| MKQVEELYHSLLELGEK                            | 2047.4             | 2            | 5.3458 | 0.3855 |
| MKRHGRGEIIGIQK                               | 1624.0             | 2            | 2.4297 | 0.1029 |
| MKSEPKADPFSFEGPEIVDCDGTIDWK                  | 3261.6             | 3            | 4.3679 | 0.126  |
| MKTATDEAYKDPSNLQ GK                          | 1998.2             | 3            | 3.2956 | 0.1389 |
| MKTILSNQTVDIPENV DITLK                       | 2373.8             | 2            | 5.6689 | 0.3729 |
| MKTILSNQTVDIPENV DITLKGR                     | 2587.0             | 3            | 6.8466 | 0.4085 |
| MKTSESSTILVVR                                | 1451.7             | 2            | 2.6492 | 0.1165 |
| MKVELCSFSGYK                                 | 1392.7             | 2            | 2.8661 | 0.1468 |
| MKVTNEDFKK                                   | 1240.5             | 2            | 3.1575 | 0.2223 |
| MKVVEVLAGHGHLYSR                             | 1797.1             | 2            | 4.8733 | 0.4286 |
| MKVYVPTGFSAFPFELLHTPEK                       | 2540.0             | 3            | 3.9108 | 0.1936 |
| MKYPHLVAGALAASAPVLAVAGLGD SNQFFR             | 3173.7             | 3            | 5.1302 | 0.4821 |
| MKYPHLVAGALAASAPVLAVAGLGD SNQFFRDVTADFEGQSPK | 4449.0             | 3            | 4.8927 | 0.4202 |
| MKYWGVASFLQK                                 | 1458.8             | 2            | 3.7266 | 0.1971 |
| MLAAQGVDPGLAR                                | 1299.5             | 2            | 3.3268 | 0.2583 |
| MLAAYLYEVSQLKD                               | 1644.9             | 2            | 3.4686 | 0.3679 |
| MLADLDDLNR                                   | 1176.3             | 2            | 3.0205 | 0.1321 |
| MLAEDELRDVLLVFANK                            | 2048.4             | 2            | 5.4373 | 0.4178 |
| MLAEDELRDVLLVFANKQDLPNAMNAAEITDK             | 3661.2             | 3            | 4.8484 | 0.3467 |
| MLAEDELRDVLLVFANKQDLPNAMNAAEITDKLGLHSLR      | 4438.1             | 3            | 5.9265 | 0.4963 |
| MLAIYDGFDFGFAK                               | 1448.7             | 2            | 4.2628 | 0.2933 |
| MLAPEGALNIHEK                                | 1423.7             | 2            | 3.5574 | 0.2397 |
| MLATLFKDER                                   | 1224.5             | 2            | 2.9352 | 0.2247 |
| MLCDTWCIEAAAR                                | 1483.8             | 2            | 3.6905 | 0.1325 |
| MLDAEDIVGTARPDEK                             | 1760.9             | 2            | 3.9882 | 0.3539 |
| MLDAEDIVNTARPDEK                             | 1818.0             | 2            | 4.3603 | 0.3052 |
| MLDAKEQEMTEMRDVMQQQLAEYQELLDVK               | 3645.2             | 3            | 3.6672 | 0.1924 |
| MLDEAVFQVFKDYISK                             | 1934.2             | 2            | 2.7085 | 0.19   |

| Peptide Sequence                           | Peptide mass (m/z) | Charge State | Xcorr  | DelCn2 |
|--------------------------------------------|--------------------|--------------|--------|--------|
| MLDGIVTDAIEASSIGFNPGHVDIYSASWGPNDGKTVEGPGR | 4447.8             | 3            | 4.9467 | 0.4416 |
| MLDLMLEAVNNIKDAMPK                         | 2047.5             | 2            | 4.0008 | 0.2655 |
| MLDLYSQISSVPIGYSHPLLK                      | 2433.9             | 3            | 4.6437 | 0.4299 |
| MLDMGFEPQIR                                | 1337.6             | 2            | 3.7633 | 0.3415 |
| MLDMKVNPIQGLASK                            | 1646.0             | 2            | 3.6655 | 0.1968 |
| MLDNDSILVDAIRK                             | 1603.9             | 2            | 3.8979 | 0.1552 |
| MLDQPFMTDIIIEASSISHMPQLIDIYSASWGPTDNGK     | 4111.6             | 3            | 5.1534 | 0.3993 |
| MLDQTLIDLNEM                               | 1436.7             | 2            | 3.809  | 0.1983 |
| MLDQTLDDLNEM                               | 1436.7             | 2            | 3.8288 | 0.2391 |
| MLEDRLDFVMR                                | 1425.7             | 3            | 3.294  | 0.2825 |
| MLEENTNILK                                 | 1205.4             | 2            | 3.5226 | 0.1644 |
| MLEHLSSLPTQMDYK                            | 1794.1             | 2            | 3.3936 | 0.3143 |
| MLEHLSSLPTQMDYKGQK                         | 2107.4             | 2            | 4.8554 | 0.3668 |
| MLEIDPQKVNINGGAVSLGHPIGMSGAR               | 2863.3             | 3            | 6.305  | 0.4742 |
| MLEKLPKLPVDKESEVVMKFPDGFEEK                | 3164.7             | 3            | 3.8129 | 0.2563 |
| MLEQLDMR                                   | 1036.3             | 2            | 2.711  | 0.2051 |
| MLETKWSLLQQQK                              | 1633.9             | 2            | 4.6924 | 0.2948 |
| MLFKDDYPSSPPK                              | 1525.8             | 2            | 3.6621 | 0.3782 |
| MLGGDEEKDPDAAKKEEERQEALR                   | 2746.0             | 3            | 4.4667 | 0.2857 |
| MLGGEEEKDPDAQKKEEER                        | 2219.4             | 3            | 4.7845 | 0.3375 |
| MLGGEEEKDPDAQKKEEERQEALR                   | 2817.0             | 3            | 5.8422 | 0.3929 |
| MLGQMTDQVADLR                              | 1478.7             | 2            | 3.2542 | 0.2219 |
| MLHDNRNEPTQPR                              | 1608.8             | 2            | 2.7553 | 0.1392 |
| MLHDYIGDKDFK                               | 1482.7             | 2            | 3.943  | 0.2755 |
| MLHDYIGDKDFKK                              | 1610.9             | 2            | 4.2524 | 0.4017 |
| MLHVDPHQR                                  | 1133.3             | 2            | 2.8142 | 0.2988 |
| MLINQHTLLFGGDTNPVHPK                       | 2233.6             | 3            | 6.3694 | 0.4108 |
| MLISILTER                                  | 1076.3             | 2            | 3.0173 | 0.1994 |
| MLISSIKEKYPSSHFIGEESVAAGEK                 | 2839.2             | 3            | 5.2808 | 0.4212 |
| MLITILGTVKPNANR                            | 1642.0             | 2            | 3.5244 | 0.3002 |
| MLKDEVSK                                   | 950.1              | 2            | 2.6041 | 0.1851 |
| MLKMGITGPEGHVLSRPEELEAEAVFR                | 2998.5             | 3            | 3.7364 | 0.2142 |
| MLKPAFIFDGR                                | 1295.6             | 2            | 3.5893 | 0.3249 |
| MLLADQGGQSWKEEVTVETWQEGSLK                 | 2993.3             | 3            | 4.5429 | 0.2189 |
| MLLDIFDENLHPLSK                            | 1786.1             | 2            | 2.6146 | 0.1852 |
| MLLDPMGGIVMTNDGNAILR                       | 2132.6             | 2            | 5.7843 | 0.365  |



| Peptide Sequence                         | Peptide mass (m/z) | Charge State | Xcorr  | DelCn2 |
|------------------------------------------|--------------------|--------------|--------|--------|
| MLLDSVLTHER                              | 1415.6             | 2            | 3.8074 | 0.2942 |
| MLLNLHKK                                 | 997.3              | 2            | 2.6674 | 0.1229 |
| MLLVDELRDVLLLLFANKQDLPNAMAISEMTDKLGLQSLR | 4488.3             | 3            | 4.3161 | 0.3428 |
| MLMDFEQLQPGDSVIQNASNSGVGQAVIQIAAALGLR    | 3844.4             | 3            | 3.8702 | 0.2406 |
| MLMHGKEVGSIIIGK                          | 1500.9             | 2            | 3.5157 | 0.2177 |
| MLNFNVPHIK                               | 1213.5             | 2            | 3.0907 | 0.122  |
| MLNGLED SIGLSK                           | 1377.6             | 2            | 3.9002 | 0.3783 |
| MLNIHPSLLPSFK                            | 1497.8             | 2            | 2.5145 | 0.1766 |
| MLPELFQDDEKAISPTSATSSGR                  | 2481.7             | 3            | 3.8851 | 0.1048 |
| MLPTIADNAGYDSADLVAQLR                    | 2348.7             | 3            | 5.5937 | 0.4217 |
| MLQADPNKVSAR                             | 1330.5             | 2            | 3.1387 | 0.1304 |
| MLQEDELRDVLLVFANK                        | 2105.4             | 2            | 4.9571 | 0.3168 |
| MLQHAASNK                                | 1000.2             | 2            | 3.0315 | 0.2827 |
| MLQHIDYR                                 | 1076.3             | 2            | 3.1245 | 0.2811 |
| MLREPAEPVAAEPK                           | 1538.8             | 2            | 3.5247 | 0.2775 |
| MLSLAEQQLVDCAQDFNNHGCQGGLPSQAF EYILYNK   | 4147.6             | 3            | 5.2669 | 0.3752 |
| MLSLDFLDDVR                              | 1324.5             | 2            | 3.0553 | 0.2184 |
| MLSLDFLDDVRR                             | 1480.7             | 2            | 2.6684 | 0.1315 |
| MLSQPYLLDPSITLGQYVQPQGVSVVDFVR           | 3351.9             | 3            | 4.1133 | 0.3122 |
| MLSSSDAITQEFMDLR                         | 1845.1             | 2            | 3.4705 | 0.2844 |
| MLSTFKELFSEK                             | 1460.7             | 2            | 2.508  | 0.2358 |
| MLTAQDMSYDEAR                            | 1531.7             | 2            | 4.507  | 0.3776 |
| MLTFNPHKR                                | 1144.4             | 2            | 2.5056 | 0.1366 |
| MLTKFETK                                 | 998.2              | 2            | 2.7069 | 0.2248 |
| MLTNHTFIK                                | 1105.3             | 2            | 2.7292 | 0.3018 |
| MLVDDIGDVTITNDGATILK                     | 2105.4             | 2            | 5.7837 | 0.4859 |
| MLVDVFAPEFR                              | 1324.6             | 2            | 3.7795 | 0.2648 |
| MLVKYPEIINSNQ                            | 1549.8             | 2            | 4.8345 | 0.3342 |
| MLVKYPEIINSNQV                           | 1648.9             | 2            | 4.9371 | 0.367  |
| MLVLDEADEMLNK                            | 1521.8             | 2            | 3.3243 | 0.1967 |
| MLVNENFEEYLR                             | 1557.8             | 2            | 4.271  | 0.3896 |
| MLVSCAKISSRSR                            | 1438.7             | 2            | 2.411  | 0.1859 |
| MLVSGAGDIK                               | 991.2              | 2            | 2.8042 | 0.1808 |
| MLVTFDEELRPLPVSVR                        | 2002.4             | 3            | 3.8606 | 0.2351 |
| MLVVGIDR                                 | 960.2              | 2            | 2.4294 | 0.1239 |
| MLVVGIDRVYEIGR                           | 1678.0             | 2            | 3.1168 | 0.2153 |

| Peptide Sequence                    | Peptide mass (m/z) | Charge State | Xcorr  | DelCn2 |
|-------------------------------------|--------------------|--------------|--------|--------|
| MLVVLLQANRDPDAGIDEAQVEQDAQALFQAGELK | 3798.2             | 3            | 7.1393 | 0.5433 |
| MLWFQGAIPAAIATAK                    | 1690.0             | 2            | 3.777  | 0.3163 |
| MMADEALGSGLVSR                      | 1437.7             | 2            | 5.4722 | 0.4676 |
| MMALDREVQYLLNK                      | 1725.1             | 2            | 3.4468 | 0.1952 |
| MMANGILKVPAINVNDVSVTK               | 2116.5             | 3            | 3.6754 | 0.2662 |
| MMDVLAPHVHGQSLAGAGGGGFLYLLTK        | 2842.3             | 3            | 3.3284 | 0.2045 |
| MMDYLQGSGETPQTDVR                   | 1929.1             | 2            | 5.9377 | 0.5238 |
| MMEIMTR                             | 912.2              | 1            | 2.1896 | 0.1493 |
| MMEVAAADVK                          | 1065.3             | 2            | 3.3676 | 0.2968 |
| MMEYGTTMVSQPLGDKVNFFR               | 2616.0             | 3            | 3.9258 | 0.3112 |
| MMFEKGEPTQTK                        | 1427.7             | 2            | 3.8846 | 0.3449 |
| MMITSQDVLHSHWAVPTLGLK               | 2228.7             | 3            | 5.6412 | 0.5283 |
| MMITSQDVLHSHWAVPTLGLKTAIPGR         | 2939.4             | 3            | 6.6469 | 0.4809 |
| MMKDLEALMFDR                        | 1500.8             | 2            | 4.2191 | 0.3752 |
| MMLDDIVSR                           | 1080.3             | 2            | 3.329  | 0.2342 |
| MMNGGHYTYSENK                       | 1560.7             | 2            | 4.7019 | 0.4057 |
| MMNGGHYTYSENKRVK                    | 1917.1             | 3            | 4.5676 | 0.3775 |
| MMNGGHYTYSENKRVKDGILTSR             | 2773.1             | 3            | 4.4052 | 0.2758 |
| MMRPVSDQVQIK                        | 1432.7             | 2            | 3.2701 | 0.1848 |
| MMTKEELEEEQR                        | 1553.7             | 2            | 4.155  | 0.3656 |
| MMTKEELEEEQRTE                      | 1784.0             | 2            | 4.5043 | 0.2884 |
| MMTKEELEEEQRTEE                     | 1913.1             | 2            | 4.9779 | 0.3955 |
| MMTKEELEEEQRVQKEQLAAIFK             | 2810.2             | 3            | 4.6435 | 0.4514 |
| MMVANKPDKIQQAK                      | 1602.9             | 2            | 3.5944 | 0.2794 |
| MMVDKDGDTVNTDGTILSMMDVDHQIAK        | 3252.7             | 3            | 7.113  | 0.4709 |
| MNCDRVFNVFCLYGNVEK                  | 2152.5             | 2            | 3.1025 | 0.1647 |
| MNDIVKEFEDR                         | 1396.6             | 2            | 3.2609 | 0.2775 |
| MNDSNSAGAGGPVK                      | 1305.4             | 2            | 2.89   | 0.3053 |
| MNEAFGDTK                           | 1013.1             | 2            | 2.6968 | 0.2653 |
| MNEFLENFEK                          | 1301.5             | 2            | 3.7611 | 0.2339 |
| MNEFLENFEKNAHLR                     | 1893.1             | 3            | 3.7508 | 0.2734 |
| MNESDAWFEEKQQQFENLDQQLR             | 2915.1             | 3            | 4.989  | 0.3654 |
| MNFANVFIGANPLAVDLLEK                | 2177.6             | 3            | 4.5963 | 0.2757 |
| MNGFIDQIDGIVHFETR                   | 1993.2             | 3            | 4.749  | 0.3767 |
| MNHHPWFNVYNK                        | 1716.9             | 3            | 3.9384 | 0.2148 |
| MNHQALVR                            | 969.1              | 2            | 2.6957 | 0.2291 |

| Peptide Sequence                         | Peptide mass (m/z) | Charge State | Xcorr  | DelCn2 |
|------------------------------------------|--------------------|--------------|--------|--------|
| MNIVPIVNTNDAVPPAEPNSDLQGVNVISVKDNDLSLAAR | 4188.7             | 3            | 3.8224 | 0.4573 |
| MNKDSKPPGNLK                             | 1329.6             | 2            | 3.016  | 0.1484 |
| MNLAIALTAAR                              | 1145.4             | 2            | 4.185  | 0.3379 |
| MNLASEPQEV LHIGSAHNR                     | 2104.3             | 2            | 5.5549 | 0.5269 |
| MNLASSFVNGFVNAAFVGGQDK                   | 2118.4             | 3            | 5.8766 | 0.5289 |
| MNLASSFVNGFVNAAFVGGQDKLLTDDGNKWLYK       | 3566.0             | 3            | 4.0551 | 0.2394 |
| MNLFQSVTSALDNSLAK                        | 1840.1             | 2            | 3.5693 | 0.3975 |
| MNLFQSVTSALDNSLAKDPTAVIFGEDVAFGGVFR      | 3719.2             | 3            | 4.0101 | 0.2269 |
| MNLGVGAYRDDNGKPYVLPVSR                   | 2422.7             | 3            | 4.6449 | 0.3121 |
| MNLSAIQDR                                | 1048.2             | 2            | 2.9212 | 0.2126 |
| MNPQSAFFQGK                              | 1255.4             | 2            | 2.902  | 0.1695 |
| MNSIKPDLIQLR                             | 1428.7             | 2            | 2.8359 | 0.141  |
| MNTNPSRGPYHFR                            | 1577.8             | 2            | 2.5339 | 0.2744 |
| MNVDKVIPVEK                              | 1272.5             | 2            | 3.177  | 0.2776 |
| MNVDAQAFHELVR                            | 1459.7             | 2            | 3.1564 | 0.24   |
| MNVFDTDLQALSR                            | 1510.7             | 2            | 4.9401 | 0.4572 |
| MNVFDTLQALSKIER                          | 1881.2             | 2            | 5.0567 | 0.3685 |
| MNVLADALK                                | 975.2              | 1            | 2.8857 | 0.1643 |
| MNVQVTQHR                                | 1113.3             | 2            | 3.0415 | 0.2689 |
| MNYSDAIVWLKEHDVKKEDGTFYEFGEDIPEAPER      | 4160.5             | 3            | 4.3137 | 0.3409 |
| MPATFIGNSTAIQELFKR                       | 2025.4             | 2            | 2.4459 | 0.1442 |
| MPDLHLKAPK                               | 1150.4             | 2            | 3.1337 | 0.1984 |
| MPDSGPLPETHK                             | 1309.5             | 2            | 4.0245 | 0.3733 |
| MPDSGPLPETHKFGEGVSSPK                    | 2198.4             | 2            | 5.0544 | 0.4529 |
| MPDSGPLPETHKFGEGVSSPKTHLGEALAPLSK        | 3416.8             | 3            | 6.2862 | 0.5452 |
| MPEDGLSDDKKPFK                           | 1607.8             | 2            | 4.4628 | 0.2856 |
| MPEENFTADHPFLFFIR                        | 2112.4             | 2            | 5.1637 | 0.4307 |
| MPEMNIKAPK                               | 1159.4             | 2            | 3.2347 | 0.1318 |
| MPFPVNHGASSEDLLK                         | 1844.1             | 2            | 4.4947 | 0.4122 |
| MPFPVNHGASSEDLLKDAAK                     | 2229.5             | 2            | 5.2471 | 0.4469 |
| MPGAPETAPGDGAGASR                        | 1542.7             | 2            | 3.4671 | 0.3207 |
| MPGGPKPGGGPGLSTPGGHPKPPHR                | 2371.7             | 3            | 3.4021 | 0.2988 |
| MPGVTPK                                  | 729.9              | 1            | 1.9755 | 0.1367 |
| MPILGLGTWK                               | 1116.4             | 2            | 2.5537 | 0.1017 |
| MPLATSTDHGHNLQTVQLLIK                    | 2318.7             | 3            | 5.4609 | 0.4741 |
| MPLIGLGTWK                               | 1116.4             | 2            | 2.5743 | 0.1183 |

| Peptide Sequence              | Peptide mass (m/z) | Charge State | Xcorr  | DelCn2 |
|-------------------------------|--------------------|--------------|--------|--------|
| MPLIGLGTWKSEPGQVK             | 1842.2             | 3            | 3.2986 | 0.185  |
| MPNVPTQPAIMKPTEEHPAYTQIAK     | 2908.3             | 3            | 4.3646 | 0.2816 |
| MPPSHQLDHSK                   | 1277.4             | 2            | 2.9478 | 0.2982 |
| MPQMIVNWQQQQQR                | 1688.0             | 2            | 2.7002 | 0.166  |
| MPSESAAQSLAVALPLQTK           | 1943.3             | 2            | 3.6955 | 0.2854 |
| MPSHQGAEQQQQQHVFISQVVTEK      | 2903.2             | 3            | 3.9033 | 0.2049 |
| MPSHQGAEQQQQQHVFISQVVTEKEFLSR | 3535.9             | 3            | 5.4594 | 0.4402 |
| MPSLPSYK                      | 923.1              | 1            | 1.8611 | 0.2183 |
| MPSSGFAAEGR                   | 1110.2             | 2            | 2.9582 | 0.2954 |
| MPTFSTPGAKGEGPDVHMTLPK        | 2299.7             | 3            | 3.9184 | 0.161  |
| MPTQSEVDNVFDTGLRDVQPYLYK      | 2817.1             | 3            | 3.7894 | 0.2789 |
| MPYQEIKNVILEVNEAVLTESMIQNLIK  | 3261.8             | 3            | 3.9518 | 0.1805 |
| MQAHIQDLEEQLDEEEGAR           | 2242.4             | 3            | 5.5819 | 0.2588 |
| MQAHIQDLEEQLDEEEGARQK         | 2498.7             | 3            | 4.4661 | 0.2889 |
| MQAQAMLEGSPQLNMVGLFR          | 2222.6             | 3            | 4.7442 | 0.3807 |
| MQAQLLELR                     | 1102.3             | 2            | 2.8031 | 0.1639 |
| MQAQMQMQMQGGDGDGGALGHHV       | 2385.7             | 3            | 3.9732 | 0.2798 |
| MQASIEKGGSLPK                 | 1346.6             | 2            | 3.5879 | 0.2245 |
| MQASIEKGGSLPKVEAK             | 1774.1             | 3            | 4.2012 | 0.1505 |
| MQAVQEATR                     | 1034.2             | 2            | 2.7784 | 0.2305 |
| MQDIKLPLSK                    | 1173.5             | 2            | 2.8821 | 0.144  |
| MQDLDEDATLTQLATAWVSLATGGEK    | 2766.0             | 2            | 5.4115 | 0.4495 |
| MQELQEAQNAR                   | 1318.4             | 2            | 2.5626 | 0.2456 |
| MQEVVANLQYDDGSGMKR            | 2042.3             | 2            | 5.0085 | 0.4491 |
| MQEVYNFNAINNSEIR              | 1943.1             | 2            | 5.0536 | 0.5056 |
| MQGLEAHKYR                    | 1233.4             | 2            | 2.6786 | 0.3232 |
| MQGQSPAPTR                    | 1170.3             | 2            | 2.6471 | 0.1386 |
| MQHNLEQQIQAR                  | 1496.7             | 2            | 4.2747 | 0.3546 |
| MQHNVLVAEVTQQLK               | 1739.0             | 2            | 3.4004 | 0.3196 |
| MQILEDHINKQLESQLHR            | 2120.4             | 3            | 4.6515 | 0.3395 |
| MQKEITALAPSTMK                | 1549.9             | 3            | 4.9842 | 0.3664 |
| MQKXKKLEKIGEGTYGTVFK          | 2299.8             | 2            | 2.4086 | 0.2015 |
| MQLAKKEEELQAALAR              | 1830.1             | 3            | 3.2016 | 0.1513 |
| MQLEVEKR                      | 1033.2             | 2            | 2.7754 | 0.1993 |
| MQLKPMEinPEMLNK               | 1817.2             | 2            | 4.96   | 0.2928 |
| MQLKPMEinPEMLNKVLSR           | 2272.8             | 3            | 4.9778 | 0.2153 |

| Peptide Sequence                  | Peptide mass (m/z) | Charge State | Xcorr  | DelCn2 |
|-----------------------------------|--------------------|--------------|--------|--------|
| MQLLEIITTEK                       | 1319.6             | 2            | 2.8943 | 0.1648 |
| MQMLEDEDDLAYAETEK                 | 2032.2             | 2            | 3.751  | 0.2812 |
| MQMLEDEDDLAYAETEEK                | 2160.4             | 2            | 4.8566 | 0.3674 |
| MQNDAENETTEKEEK                   | 1898.0             | 2            | 4.8343 | 0.3496 |
| MQNHFGAVR                         | 1060.2             | 2            | 3.0925 | 0.2929 |
| MQNHGYENPTYK                      | 1482.6             | 2            | 3.9927 | 0.2609 |
| MQQAEQALQDILRDAQISEGASR           | 2559.8             | 3            | 4.1228 | 0.2787 |
| MQQNIQELEEQLLEEEESAR              | 2334.5             | 2            | 6.652  | 0.3872 |
| MQQNIQELEEQLLEEEESARQK            | 2590.8             | 2            | 5.0232 | 0.2586 |
| MQQNIQELEEQLLEEEESARQKLQLEK       | 3202.5             | 3            | 5.2907 | 0.2092 |
| MQQNIQELEEQLLEEEESARQKLQLEKVTTEAK | 3832.2             | 3            | 5.7741 | 0.3101 |
| MQQQLDEYQELLDIK                   | 1895.1             | 2            | 5.4442 | 0.3424 |
| MQQQLDEYQELLDIKLALDMEIHAYRK       | 3336.8             | 3            | 4.4701 | 0.3045 |
| MQQSVYVKDDK                       | 1341.5             | 2            | 2.7332 | 0.1733 |
| MQQVENGLSEK                       | 1263.4             | 2            | 3.6371 | 0.2491 |
| MQQYDLQGQPYGTR                    | 1685.8             | 2            | 4.9818 | 0.4159 |
| MQTNQTPPTYNK                      | 1423.6             | 2            | 3.5425 | 0.1464 |
| MQVDQEEGHQK                       | 1329.4             | 2            | 3.9446 | 0.1474 |
| MQYAPNTQVEILPQGR                  | 1846.1             | 2            | 4.4256 | 0.3136 |
| MRAEDGENYDIK                      | 1441.5             | 2            | 3.5046 | 0.1172 |
| MRAEDGENYDIKK                     | 1569.7             | 3            | 4.9118 | 0.2458 |
| MRAEDGENYDIKKQAEILQESR            | 2624.9             | 3            | 4.1115 | 0.2701 |
| MRDVVLSIVNDLTIAESNCPR             | 2346.7             | 3            | 3.8051 | 0.165  |
| MREDYDSVEQDGDPEGPQR               | 2224.3             | 3            | 5.546  | 0.3287 |
| MREEFPDRIMNTFSVVPSPK              | 2381.8             | 3            | 3.6815 | 0.2075 |
| MREESGAR                          | 936.0              | 2            | 2.6132 | 0.1378 |
| MREEYDKIQIADLMEEK                 | 2142.4             | 3            | 3.2496 | 0.1349 |
| MREHLELFWSR                       | 1504.7             | 2            | 2.5983 | 0.1522 |
| MREHVMNEVDTNKDR                   | 1875.1             | 3            | 5.1303 | 0.3597 |
| MREIVHIQAGQCGNQIGAK               | 2054.4             | 2            | 5.5076 | 0.4115 |
| MREIVHLQAGQCGNQIGAK               | 2054.4             | 2            | 6.0114 | 0.396  |
| MREQQALSR                         | 1119.3             | 2            | 3.1027 | 0.1101 |
| MRESALEPGPVPEAPAGGPVHAVTVVTLLEK   | 3153.6             | 3            | 3.7119 | 0.1775 |
| MREWFSETFQK                       | 1489.7             | 2            | 2.7834 | 0.1378 |
| MRHEAPMQMASAQDAR                  | 1831.1             | 2            | 3.9983 | 0.4322 |
| MRIESLSSQLSNLQK                   | 1735.0             | 2            | 5.1721 | 0.2262 |

| Peptide Sequence                  | Peptide mass (m/z) | Charge State | Xcorr  | DelCn2 |
|-----------------------------------|--------------------|--------------|--------|--------|
| MRLEGQLEALSLEASQALKEK             | 2345.7             | 3            | 4.849  | 0.3054 |
| MRLESLSYQLSGLQK                   | 1754.0             | 2            | 5.271  | 0.3935 |
| MRPGAYSTGYGGYEEYSGLSDGYGFTTDLFGR  | 3476.7             | 3            | 6.3878 | 0.536  |
| MRPHIFTLVFPFPTPLAEIAHGSLAPDAEPHQR | 3764.3             | 3            | 4.4009 | 0.3742 |
| MRQSGAFLSTSEGLILQLVGDVHPQFK       | 3031.5             | 3            | 3.3857 | 0.2107 |
| MRYVASYLLAALGGNSSPSAK             | 2157.5             | 2            | 4.078  | 0.4044 |
| MSAEINEIIR                        | 1176.4             | 2            | 3.7069 | 0.1753 |
| MSASDPNSSIFLDTAK                  | 1786.0             | 2            | 6.0703 | 0.4891 |
| MSATFIGNSTAIQELFKR                | 2015.3             | 3            | 4.4949 | 0.1622 |
| MSDGKKEELQK                       | 1293.5             | 2            | 3.7605 | 0.2516 |
| MSDGLFLQK                         | 1039.2             | 2            | 2.9853 | 0.2863 |
| MSDSLDTDPSMLGSSK                  | 1671.8             | 2            | 5.2175 | 0.4688 |
| MSEDKPQDYK                        | 1241.4             | 2            | 3.3795 | 0.303  |
| MSEDKPQDYKK                       | 1369.5             | 2            | 2.771  | 0.1714 |
| MSEKDTKEEILK                      | 1451.7             | 2            | 3.8021 | 0.2519 |
| MSESLDTADPAVTGAK                  | 1593.7             | 2            | 4.9238 | 0.4753 |
| MSELETDPAITAAK                    | 1564.7             | 2            | 4.1357 | 0.354  |
| MSFGEIEEDAYQEDLGFSLGHLGK          | 2673.9             | 3            | 3.442  | 0.3077 |
| MSGGWELELNGTEAK                   | 1622.8             | 2            | 5.0694 | 0.4076 |
| MSGNGRELGEYGFHEYTEVK              | 2304.5             | 3            | 5.309  | 0.3711 |
| MSGSGRELGEYGLQAYTEVK              | 2176.4             | 3            | 3.8386 | 0.2297 |
| MSIASSHGGHPLDVPDHIIAYHR           | 2511.8             | 3            | 4.9748 | 0.3011 |
| MSIFGHSMGGHGALICALK               | 1931.3             | 2            | 3.5334 | 0.3605 |
| MSIFGHSMGGHGALICALKNPGK           | 2327.8             | 3            | 3.8191 | 0.1926 |
| MSKPHLHETEEQPYFR                  | 2030.3             | 2            | 3.7317 | 0.3653 |
| MSLDPADLTHDTTGLTAK                | 1888.1             | 2            | 4.4659 | 0.4283 |
| MSLDPADLTHDTTGLTAKEALDEVFTK       | 3163.5             | 3            | 5.8512 | 0.4309 |
| MSLFYAEATPMLK                     | 1502.8             | 2            | 3.4883 | 0.4355 |
| MSLHNLATVFGPTLLRPSEVESK           | 2527.9             | 3            | 4.1114 | 0.3821 |
| MSLLQLVEILQSK                     | 1502.8             | 2            | 4.25   | 0.167  |
| MSLPDVDLDLKGPK                    | 1528.8             | 2            | 2.4002 | 0.2145 |
| MSMKEVDEQMLAIQSK                  | 1869.2             | 2            | 3.5627 | 0.1626 |
| MSMKEVDEQMLNVQNK                  | 1925.2             | 2            | 5.467  | 0.4151 |
| MSMKEVDEQMLNVQNKNSSYFVEWIPNNVK    | 3604.1             | 3            | 4.6262 | 0.4352 |
| MSNYDSDLFVFPYFEAIQK               | 2182.4             | 2            | 5.1573 | 0.513  |
| MSPKPELTEEQKQEIIR                 | 1944.2             | 2            | 2.7149 | 0.1303 |

| Peptide Sequence                | Peptide mass (m/z) | Charge State | Xcorr  | DelCn2 |
|---------------------------------|--------------------|--------------|--------|--------|
| MSPYKDILETHLR                   | 1603.9             | 2            | 3.4035 | 0.4461 |
| MSQDDFQSPPIVELR                 | 1763.0             | 2            | 2.9573 | 0.2256 |
| MSQLEVKEKELNK                   | 1576.8             | 2            | 3.4538 | 0.1416 |
| MSQVAPSLSALIGEAVGAR             | 1858.2             | 2            | 4.5394 | 0.4317 |
| MSSAALIHHTYK                    | 1359.6             | 2            | 3.4356 | 0.3362 |
| MSSEVVDSNPYSR                   | 1471.6             | 2            | 4.3961 | 0.4027 |
| MSSFGDFVALSDVCDVPTAK            | 2090.4             | 2            | 3.5065 | 0.1004 |
| MSSPEDDSDTKR                    | 1368.4             | 2            | 2.6953 | 0.3111 |
| MSSSDTPLGTVALLQEK               | 1778.0             | 2            | 4.3848 | 0.4309 |
| MSSSEEEKIDLLDRK                 | 1868.1             | 3            | 3.6822 | 0.2101 |
| MSSTFIGNSTAIQELFK               | 1875.1             | 2            | 4.7263 | 0.4139 |
| MSSTFIGNSTAIQELFKR              | 2031.3             | 2            | 4.34   | 0.5149 |
| MSSTIFSTGGKDPLSANHSLKPLPSVPEEK  | 3156.6             | 3            | 5.2243 | 0.3992 |
| MSSYAFFVQTCR                    | 1440.7             | 2            | 3.4796 | 0.3191 |
| MSTEEIIQR                       | 1107.3             | 2            | 2.5275 | 0.2168 |
| MSTGTFVVSQPLNYR                 | 1700.9             | 2            | 4.608  | 0.4779 |
| MSVEADINGLR                     | 1205.4             | 2            | 3.083  | 0.307  |
| MSVEEQIDR                       | 1107.2             | 2            | 2.4554 | 0.1907 |
| MSVIWDKAVVTGK                   | 1434.7             | 2            | 3.8722 | 0.2932 |
| MSVQPTVSLGGFEITPPVVLRL          | 2228.6             | 2            | 5.5562 | 0.5779 |
| MSVTEGGIKYPETTEGGRPK            | 2138.4             | 3            | 4.414  | 0.3798 |
| MSYLELMEHPFFTLHK                | 2024.4             | 2            | 3.7809 | 0.3699 |
| MTAALPKLDLHVIPVWQK              | 2061.5             | 3            | 3.5988 | 0.29   |
| MTAMDNASK                       | 969.1              | 2            | 2.6045 | 0.1372 |
| MTAMDNASKNASEMIDKLTLLTFNR       | 2704.1             | 3            | 5.5282 | 0.3993 |
| MTATGSGENSTVAEHLIAQHSAIK        | 2454.7             | 3            | 3.526  | 0.2695 |
| MTDFDRFKVMK                     | 1418.7             | 2            | 2.5245 | 0.1134 |
| MTDIMTEGITIVEDINKR              | 2080.4             | 3            | 3.5469 | 0.3845 |
| MTDLLEEGITVVENIYK               | 1968.3             | 2            | 2.9976 | 0.3053 |
| MTDLTSSIPKLLPVGNKPLIWIYPLNLLER  | 3421.1             | 3            | 3.7092 | 0.2171 |
| MTDQEAIQDLWQWR                  | 1821.0             | 3            | 4.7417 | 0.2915 |
| MTDQEAIQDLWQWRK                 | 1949.2             | 3            | 4.2444 | 0.1443 |
| MTDSFTEQADQVTAEVGK              | 1958.1             | 2            | 4.0916 | 0.246  |
| MTDSFTEQADQVTAEVGKLLGEEK        | 2627.9             | 3            | 4.0599 | 0.2686 |
| MTEAQEDGQSTSELIGQFGVGFYSAFLVADK | 3327.6             | 3            | 3.8119 | 0.2912 |
| MTEELEALR                       | 1092.2             | 2            | 2.5599 | 0.2409 |

| Peptide Sequence                             | Peptide mass (m/z) | Charge State | Xcorr  | DelCn2 |
|----------------------------------------------|--------------------|--------------|--------|--------|
| MTEEPLMCAYCVTEPGAGSDVAGIKTK                  | 2803.2             | 3            | 3.3098 | 0.114  |
| MTEQHFPHPHIQSFSPESMPEPLNGPINILGEGR           | 3689.1             | 3            | 4.6719 | 0.2744 |
| MTGSEFDFEEMKR                                | 1607.8             | 2            | 3.9682 | 0.4475 |
| MTHNLLLNYGLYR                                | 1608.9             | 2            | 4.3718 | 0.3812 |
| MTIAGTTDTPDVTTHHPIPSEEDINFILNEVR             | 3565.9             | 3            | 5.4187 | 0.3539 |
| MTILQTYFR                                    | 1173.4             | 2            | 3.494  | 0.2343 |
| MTISQQEFGR                                   | 1197.3             | 2            | 2.9356 | 0.2629 |
| MTITEQKYEGEYR                                | 1648.8             | 2            | 2.9522 | 0.318  |
| MTKEELNALK                                   | 1177.4             | 2            | 3.156  | 0.217  |
| MTKPPVQEMVDELQGPFSYDFSYPWAR                  | 3123.5             | 3            | 4.8693 | 0.2334 |
| MTLADDVTLDDLIMAKDDLKSGADIK                   | 2681.0             | 3            | 4.9006 | 0.3835 |
| MTLDTLSIYETPSMGLLDKK                         | 2257.7             | 3            | 3.8203 | 0.3441 |
| MTLVASEDYGDTLAAIQGLLK                        | 2210.5             | 2            | 7.0012 | 0.5592 |
| MTNAQIILLIDNAR                               | 1586.9             | 2            | 4.4886 | 0.3101 |
| MTNGFSGADLTEICQR                             | 1743.9             | 2            | 3.9943 | 0.337  |
| MTNTNLAVVFGPNLLWAK                           | 1990.4             | 2            | 4.0973 | 0.42   |
| MTNYDVEHTIK                                  | 1351.5             | 2            | 3.9026 | 0.3348 |
| MTNYDVEHTIKK                                 | 1479.7             | 2            | 4.6643 | 0.423  |
| MTPGHLLVSVGQFRPEK                            | 1897.2             | 2            | 2.6713 | 0.1503 |
| MTQLVLPGMVER                                 | 1374.7             | 2            | 2.6197 | 0.1515 |
| MTQQQENPK                                    | 1104.2             | 2            | 2.9887 | 0.2558 |
| MTSGDVLSNRK                                  | 1208.4             | 2            | 2.413  | 0.133  |
| MTSSDKDFR                                    | 1087.2             | 2            | 2.4151 | 0.1892 |
| MTTQSPLNQSSMNAMGSLSVLSPDRVLPQLISTITASVQNPALR | 4657.4             | 3            | 3.6026 | 0.1338 |
| MTTSTDHLKR                                   | 1190.4             | 2            | 2.8805 | 0.273  |
| MTVNNLHPR                                    | 1082.3             | 2            | 2.9364 | 0.2141 |
| MVADTISRTEK                                  | 1251.4             | 2            | 2.6407 | 0.1539 |
| MVEEIGVELVVLDPDLPEDKLAQSVQK                  | 3108.6             | 3            | 4.7126 | 0.4212 |
| MVEGFFDR                                     | 1001.1             | 2            | 2.7507 | 0.22   |
| MVEGFFDRGASIVEDKLVEDLR                       | 2526.9             | 3            | 3.9548 | 0.1304 |
| MVEGFFDRGASIVEDKLVEDLRTR                     | 2784.1             | 3            | 3.6511 | 0.2727 |
| MVEKDQDGGR                                   | 1135.2             | 2            | 3.2132 | 0.2878 |
| MVEKDQDGGRK                                  | 1263.4             | 2            | 2.6947 | 0.1015 |
| MVFINNIALAQIK                                | 1475.8             | 2            | 3.4902 | 0.135  |
| MVGGIAQIIAAQEEMLR                            | 1831.2             | 2            | 4.847  | 0.4589 |
| MVGGIAQIIAAQEEMLRK                           | 1959.4             | 2            | 2.6747 | 0.1603 |



| Peptide Sequence                | Peptide mass (m/z) | Charge State | Xcorr  | DelCn2 |
|---------------------------------|--------------------|--------------|--------|--------|
| MVGVPAAALDMMLTGR                | 1562.9             | 2            | 4.2175 | 0.4357 |
| MVHFLTHYADK                     | 1362.6             | 2            | 2.5652 | 0.1239 |
| MVHFLTHYADKIESVHFSDQFSGPK       | 2922.3             | 3            | 7.1459 | 0.5344 |
| MVINHLEK                        | 984.2              | 2            | 2.5609 | 0.161  |
| MVINHLEKLFVTNDAATILR            | 2299.7             | 3            | 5.5115 | 0.458  |
| MVIPGGIDVHTR                    | 1295.5             | 2            | 3.1957 | 0.3684 |
| MVIPGGIDVNTYLQKPSQGMTAADDFFQGTR | 3359.8             | 3            | 4.2303 | 0.3349 |
| MVIPNQPLTATK                    | 1410.7             | 2            | 3.219  | 0.2153 |
| MVISNPAATHQDIDFLIEEIER          | 2542.8             | 3            | 5.8057 | 0.4404 |
| MVKDQQEAEK                      | 1206.4             | 2            | 2.965  | 0.1458 |
| MVKEALHER                       | 1113.3             | 2            | 2.4904 | 0.1379 |
| MVLAAAGGVEHQQLDLAQK             | 2093.4             | 2            | 5.875  | 0.4791 |
| MVLDSLVIQR                      | 1224.5             | 2            | 2.518  | 0.2709 |
| MVLVDLPGVINTVTSGMAPDTKETIFSISK  | 3165.7             | 3            | 3.4733 | 0.271  |
| MVLVGDVKDR                      | 1132.4             | 2            | 3.0159 | 0.2862 |
| MVMESGDWLVGGDLQVLEK             | 2107.4             | 2            | 2.8365 | 0.1671 |
| MVMIQDGPQNTGADKPLR              | 1972.3             | 2            | 4.8213 | 0.3761 |
| MVMPSWFDLMGLSPDAPEDAEGIKK       | 2766.2             | 2            | 3.8052 | 0.3775 |
| MVNDAEK                         | 806.9              | 1            | 1.8597 | 0.144  |
| MVNDAEKFAEEDKK                  | 1654.8             | 2            | 4.7866 | 0.2815 |
| MVNDAEKFAEEDKCLK                | 1896.2             | 2            | 4.5639 | 0.2934 |
| MVNDAEKFAEEDKCLKER              | 2181.5             | 3            | 5.2514 | 0.3499 |
| MVNHFIAEFK                      | 1236.5             | 3            | 3.4952 | 0.3949 |
| MVNHFIAEFKR                     | 1392.7             | 2            | 4.175  | 0.3755 |
| MVNKAADAVNK                     | 1161.4             | 2            | 3.5302 | 0.2833 |
| MVNPTVFFDIAVDGEPLGR             | 2078.4             | 2            | 3.8402 | 0.365  |
| MVNSNLASVEELKEIDVEVRK           | 2403.7             | 3            | 3.5894 | 0.2585 |
| MVPAGMGAGLER                    | 1189.4             | 2            | 2.7527 | 0.2396 |
| MVPVSVQQSLAAYNQR                | 1792.1             | 2            | 5.6416 | 0.4968 |
| MVQAEKYKAEDEK                   | 1698.9             | 2            | 4.7153 | 0.2764 |
| MVQAEKYKAEDEKQR                 | 1983.2             | 3            | 5.2099 | 0.3398 |
| MVQAEKYKAEDEVQR                 | 1954.2             | 2            | 4.6697 | 0.3682 |
| MVQAEKYKAEDEVQRER               | 2239.5             | 3            | 4.3315 | 0.3112 |
| MVQVGVPMAIR                     | 1300.7             | 2            | 2.857  | 0.1001 |
| MVRELFEMAR                      | 1282.6             | 2            | 2.9964 | 0.2917 |
| MVSDINNGWQHLEQAEK               | 2000.2             | 2            | 5.0665 | 0.3637 |

| Peptide Sequence              | Peptide mass (m/z) | Charge State | Xcorr  | DelCn2 |
|-------------------------------|--------------------|--------------|--------|--------|
| MVSDINNGWQHLEQAEKGYEEWLLNEIR  | 3403.7             | 3            | 5.4267 | 0.3353 |
| MVSHLAEFEKFR                  | 1347.6             | 2            | 2.7169 | 0.2789 |
| MVSSYVGENAEFER                | 1618.7             | 2            | 3.6886 | 0.2602 |
| MVSVLPIFR                     | 1062.4             | 2            | 2.592  | 0.1967 |
| MVTGDNINTAR                   | 1192.3             | 2            | 3.3988 | 0.2763 |
| MVTKNDVMNLLLESAGFSR           | 2013.3             | 2            | 3.6675 | 0.327  |
| MVTLYDNEEVGSESAQGAQSLLTELVLRR | 3210.6             | 3            | 3.9045 | 0.2227 |
| MVVDVAVMMLDDLLQLK             | 1835.3             | 2            | 4.4173 | 0.2453 |
| MVVESAYEVIK                   | 1268.5             | 2            | 2.9015 | 0.2358 |
| MVVNEGSDGGQSVYHVHLHVLGGR      | 2548.8             | 3            | 5.6154 | 0.4809 |
| MVVPAAALK                     | 829.1              | 1            | 1.6489 | 0.1504 |
| MVVPGLDGAQIPR                 | 1353.6             | 2            | 2.5453 | 0.3099 |
| MWSIENIAFGSGGGLLQK            | 1909.2             | 2            | 6.0918 | 0.4    |
| MYAALGDPKAPGLGAFR             | 1736.0             | 3            | 3.8472 | 0.4323 |
| MYEEHLK                       | 950.1              | 2            | 2.4474 | 0.1834 |
| MYEEHLKR                      | 1106.3             | 2            | 2.5916 | 0.1978 |
| MYESFIESLPFLK                 | 1604.9             | 2            | 4.3987 | 0.3172 |
| MYKEEGLK                      | 998.2              | 2            | 2.5308 | 0.1853 |
| MYKEEGLKAFYK                  | 1507.8             | 3            | 4.0185 | 0.3195 |
| MYKGFQALGDAADIR               | 1656.9             | 2            | 4.1555 | 0.404  |
| MYKTTTPDVIFVFGFR              | 1822.2             | 2            | 3.9239 | 0.3088 |
| MYPIDFEKDDDSNFHMDFIVAASNLR    | 3092.4             | 3            | 4.41   | 0.3375 |
| MYQKGQETSTNPIASIFAWTR         | 2430.7             | 2            | 4.9332 | 0.4329 |
| MYSYVTEELPQLINANFPVDPQR       | 2726.1             | 3            | 6.1058 | 0.4865 |
| MYVQTVLDVHKK                  | 1461.8             | 2            | 2.7074 | 0.1552 |
| NAAANDKLLK                    | 1073.2             | 2            | 3.0037 | 0.1318 |
| NAADSSVPSAPR                  | 1172.2             | 2            | 3.2779 | 0.3109 |
| NAADSYFSLQGFINSLEDESTQESK     | 2765.9             | 3            | 5.0997 | 0.4553 |
| NAAGALDLLKELK                 | 1356.6             | 2            | 4.028  | 0.1918 |
| NAAGNFYINDK                   | 1227.3             | 2            | 3.2475 | 0.3308 |
| NAAHALPTTLGALER               | 1535.7             | 2            | 4.1421 | 0.4164 |
| NAAIAVLEELKLPPLPAVER          | 2272.7             | 3            | 4.919  | 0.3329 |
| NAALDVEPIHAFR                 | 1453.6             | 2            | 2.6642 | 0.2119 |
| NAALNTIVTVYNVHGDQVFK          | 2204.5             | 2            | 3.855  | 0.426  |
| NAAQELATLLLSLPAPASVQQQSK      | 2479.8             | 3            | 3.2785 | 0.2781 |
| NAAQFLLSTNDKTIK               | 1664.9             | 2            | 3.4939 | 0.1675 |

| Peptide Sequence                 | Peptide mass (m/z) | Charge State | Xcorr  | DelCn2 |
|----------------------------------|--------------------|--------------|--------|--------|
| NAASFKEVSDSLLTSSK                | 1784.9             | 3            | 4.55   | 0.3976 |
| NAATEDLWESLENASGKPIAAVMNTWTK     | 3049.4             | 3            | 6.3062 | 0.423  |
| NADELVKQKIHTSVISGYR              | 2256.5             | 3            | 4.0079 | 0.2543 |
| NADGKIISLDAK                     | 1245.4             | 2            | 3.4449 | 0.3272 |
| NADGYKLDKQHTFR                   | 1693.8             | 2            | 3.8739 | 0.3417 |
| NADHLLHLK                        | 1061.2             | 2            | 2.9769 | 0.2494 |
| NADLQVLKPEPELVYEDLR              | 2242.5             | 3            | 3.7517 | 0.3693 |
| NADMSEDMQQDAVDCATQAMEK           | 2432.6             | 3            | 3.4245 | 0.1999 |
| NADMSEEMQQDSVECATQALEK           | 2458.6             | 3            | 4.9837 | 0.3067 |
| NADNNSAFTALSEERDQLLSQVKELSMVTELR | 3698.0             | 3            | 4.5802 | 0.2388 |
| NADPAELEQIVLSPAFILAAESLPK        | 2638.0             | 3            | 5.8984 | 0.4569 |
| NADSEIKHSTPSPTR                  | 1640.7             | 2            | 4.0816 | 0.4674 |
| NADYVQEVKR                       | 1222.3             | 2            | 2.5912 | 0.1794 |
| NAEAVLQSPGLSGK                   | 1371.5             | 2            | 4.1244 | 0.3641 |
| NAEGKRPVELVPPESPLAQLFLER         | 2691.1             | 3            | 4.2507 | 0.3053 |
| NAEHSPLPHYL GALER                | 1707.9             | 2            | 2.5421 | 0.2029 |
| NAEIGNKDFELDVLEEAYTTEHWLVR       | 3093.3             | 3            | 3.8171 | 0.2486 |
| NAELKFNFGEFEFKFPPKDG FVALSK      | 2990.4             | 3            | 4.5366 | 0.2732 |
| NAEPLINLDVNNPDFK                 | 1814.0             | 2            | 4.4994 | 0.4099 |
| NAEQYKDQADK                      | 1310.4             | 2            | 3.8258 | 0.2435 |
| NAEQYKDQADKASTR                  | 1725.8             | 2            | 4.7815 | 0.4608 |
| NAESNAELKGLDVDSLVIIEHIQVNK       | 2737.0             | 3            | 3.4706 | 0.2576 |
| NAESNAELKGLDVDSLVIIEHIQVNKAPK    | 3033.4             | 3            | 5.3129 | 0.464  |
| NAFACFDEEATGTIQEDYLR             | 2294.4             | 2            | 5.978  | 0.5846 |
| NAFGSTHAEALLK                    | 1359.5             | 2            | 3.7992 | 0.3114 |
| NAFMMLIHADQDR                    | 1562.8             | 2            | 3.5938 | 0.4124 |
| NAGAVIGK                         | 729.8              | 1            | 1.9174 | 0.174  |
| NAGAVIGKGGKNIK                   | 1327.6             | 2            | 2.4365 | 0.1362 |
| NAGEIGEMKDGVP EGAQLQGPVHR        | 2490.7             | 3            | 4.1783 | 0.3325 |
| NAGIEAQDRR                       | 1130.2             | 2            | 2.782  | 0.1263 |
| NAGLAFIELVNEGR                   | 1503.7             | 2            | 3.6436 | 0.2023 |
| NAGYAVSLR                        | 951.1              | 2            | 2.5139 | 0.2108 |
| NAHSTAIAGLTF LHRPELLVTNGADNALR   | 3074.4             | 3            | 3.3578 | 0.2015 |
| NAIAKDNDIHSEVSTAELGKR            | 2269.5             | 3            | 5.0826 | 0.4384 |
| NAIANASTLAEVER                   | 1459.6             | 2            | 2.4272 | 0.2301 |
| NAIDKLFVLF GAEILK                | 1792.2             | 2            | 5.081  | 0.4738 |

| Peptide Sequence              | Peptide mass (m/z) | Charge State | Xcorr  | DelCn2 |
|-------------------------------|--------------------|--------------|--------|--------|
| NAIDKLFVLFGAEILKK             | 1920.3             | 2            | 3.2456 | 0.2448 |
| NAIHTFVQSGSHLAAR              | 1709.9             | 2            | 5.1419 | 0.5133 |
| NAINIEELFQGISR                | 1604.8             | 2            | 4.5943 | 0.3338 |
| NAINTEMYHEIMR                 | 1622.9             | 2            | 3.6244 | 0.3768 |
| NALDPMSVLLAR                  | 1300.6             | 2            | 3.3497 | 0.2532 |
| NALESYAFNMK                   | 1288.5             | 2            | 3.4984 | 0.2952 |
| NALGAIHHTISVR                 | 1389.6             | 2            | 3.302  | 0.1983 |
| NALGPGLSPELGPLPALR            | 1773.1             | 2            | 5.3425 | 0.4515 |
| NALKQETEVELYNEFPEPIK          | 2392.6             | 2            | 4.2989 | 0.2716 |
| NALKQETEVELYNEFPEPIKLDK       | 2749.1             | 3            | 5.9768 | 0.3858 |
| NALKQETEVELYNEFPEPIKLDKNDR    | 3134.4             | 3            | 5.9737 | 0.5108 |
| NALKWDKDNLQILR                | 1728.0             | 2            | 3.2309 | 0.2256 |
| NALPALLIYKGGELIGNFVR          | 2159.6             | 2            | 2.9463 | 0.1813 |
| NALQQENHIIDGVK                | 1579.7             | 2            | 4.3381 | 0.3073 |
| NALVSHLDGTTTPVCEDIGR          | 1998.2             | 2            | 4.7486 | 0.4098 |
| NAMGSLASQATK                  | 1179.3             | 2            | 4.0533 | 0.3281 |
| NANAEPVQR                     | 1070.1             | 2            | 3.3813 | 0.2862 |
| NANELSVLKDEVLEVLEDGR          | 2243.5             | 3            | 3.8771 | 0.2747 |
| NANFKFTDHLK                   | 1335.5             | 2            | 2.5672 | 0.1051 |
| NANKPLLDEIVPVYRR              | 1898.2             | 2            | 3.1987 | 0.2948 |
| NAPAIIFIDELDAIAPK             | 1812.1             | 2            | 5.0705 | 0.4316 |
| NAPAIIFIDELDAIAPKR            | 1968.3             | 2            | 5.254  | 0.4643 |
| NAPPEPVPPP                    | 1171.3             | 1            | 2.4989 | 0.191  |
| NAQLNIELEAAHH                 | 1460.6             | 2            | 3.8705 | 0.2698 |
| NAQMAQSPILLGGAASTLLQNR        | 2368.7             | 2            | 6.1049 | 0.4702 |
| NAQSNALQER                    | 1131.2             | 2            | 3.1795 | 0.2311 |
| NASDMPETITSR                  | 1322.4             | 2            | 2.5999 | 0.3111 |
| NASEMIDKLTLTFNR               | 1754.0             | 3            | 4.8463 | 0.48   |
| NASGVVNSSPR                   | 1088.2             | 2            | 2.74   | 0.2469 |
| NASSRPASAIISGQNNNHSGNKPDPPPVL | 2984.2             | 3            | 3.4244 | 0.3731 |
| NATNVEQAFMTMAAEIK             | 1870.1             | 2            | 6.0702 | 0.5425 |
| NATNVEQAFMTMAAEIKK            | 1998.3             | 2            | 2.8514 | 0.1122 |
| NATNVEQAFMTMAAEIKKR           | 2154.5             | 2            | 3.8536 | 0.3947 |
| NATNVEQSFMTMAAEIK             | 1886.1             | 2            | 5.6435 | 0.4757 |
| NATSLQHLLSGAK                 | 1340.5             | 2            | 3.0228 | 0.3727 |
| NAVDAFRVNVIHAR                | 1582.8             | 2            | 2.6743 | 0.1849 |

| Peptide Sequence                         | Peptide mass (m/z) | Charge State | Xcorr  | DelCn2 |
|------------------------------------------|--------------------|--------------|--------|--------|
| NAVEEYVVEFR                              | 1419.5             | 2            | 3.0525 | 0.1865 |
| NAVITVPAYFNDSQR                          | 1695.9             | 2            | 4.1258 | 0.3151 |
| NAVPDIQGDSEAVSVR                         | 1657.8             | 2            | 2.9778 | 0.1054 |
| NAVTQEFGPVPDTAR                          | 1602.7             | 2            | 4.0133 | 0.3444 |
| NAVTQFVSSMSASADVLALAK                    | 2111.4             | 2            | 6.294  | 0.4677 |
| NAYAVLYDIILK                             | 1396.7             | 2            | 4.5066 | 0.3416 |
| NAYAVLYDIILKNFEK                         | 1915.2             | 2            | 4.7881 | 0.3065 |
| NAYSHKENLQLNQETEAIKEELLYFK               | 3154.5             | 3            | 6.7732 | 0.4587 |
| NAYTPQEIVGGIPDSEQLLPELLK                 | 2626.0             | 3            | 3.6995 | 0.2242 |
| NAYTPQEIVGGIPDSEQLLPELLKK                | 2754.1             | 3            | 4.6599 | 0.3045 |
| NDANPETHAFVTSPEIVTALAIAGTLK              | 2782.1             | 3            | 5.7551 | 0.4019 |
| NDDDEEEAAR                               | 1164.1             | 2            | 3.5913 | 0.3111 |
| NDEALRQLEAELGAER                         | 1814.9             | 3            | 4.6213 | 0.2966 |
| NDEELNKLLGGVTIAQGGVLPNIQAVLLPK           | 3115.6             | 3            | 6.3305 | 0.4657 |
| NDEELNKLLGGVTIAQGGVLPNIQAVLLPKK          | 3243.8             | 3            | 4.5104 | 0.2106 |
| NDEELNKLLGK                              | 1273.4             | 2            | 3.45   | 0.1175 |
| NDEELNKLLGKVITIAQGGVLPNIQAVLLPK          | 3186.7             | 3            | 6.9125 | 0.4706 |
| NDEELNKLLGRVTIAQGGVLPNIQAVLLPK           | 3214.7             | 3            | 5.8556 | 0.4569 |
| NDEYENLFNMIVEIPR                         | 1997.2             | 3            | 4.4708 | 0.2268 |
| NDFAIHTLK                                | 1059.2             | 2            | 2.7396 | 0.2139 |
| NDFQLIGIQDGYLSLLQDSGEVR                  | 2581.8             | 2            | 6.1756 | 0.4238 |
| NDFQLIGIQDGYLSLLQDSGEVREDLRLPEGDLGK      | 3905.3             | 3            | 4.387  | 0.3102 |
| NDFQLIGIQDGYLSLLQDSGEVREDLRLPEGDLGKEIEQK | 4533.0             | 3            | 3.6249 | 0.2601 |
| NDFTEEEEAQVR                             | 1467.5             | 2            | 3.7156 | 0.3246 |
| NDGAAILAAVSSIAQK                         | 1529.7             | 2            | 5.2622 | 0.4794 |
| NDGAAILAAVSSIAQKIR                       | 1799.1             | 2            | 3.5309 | 0.1986 |
| NDGALYHNNEEK                             | 1404.4             | 2            | 4.0393 | 0.2796 |
| NDGYLMFQQVPMVEIDGMK                      | 2216.6             | 2            | 4.9868 | 0.3914 |
| NDGYLMFQQVPMVEIDGMKLVQTR                 | 2814.3             | 3            | 4.1918 | 0.2706 |
| NDIASHPPVEGSYAPR                         | 1710.8             | 2            | 3.9287 | 0.387  |
| NDKGDIIVTTK                              | 1204.4             | 2            | 2.9765 | 0.3132 |
| NDKSEEEQSSSSVK                           | 1554.6             | 2            | 4.2377 | 0.3081 |
| NDKSEEEQSSSSVKK                          | 1682.7             | 2            | 3.9491 | 0.2986 |
| NDKSEEEQSSSSVKKDETNVK                    | 2369.4             | 3            | 5.3086 | 0.2235 |
| NDLAVVDVR                                | 1001.1             | 2            | 2.7538 | 0.1753 |
| NDLIVFLADQNAPYFKPK                       | 2094.4             | 2            | 4.2781 | 0.3272 |

| Peptide Sequence                              | Peptide mass (m/z) | Charge State | Xcorr  | DelCn2 |
|-----------------------------------------------|--------------------|--------------|--------|--------|
| NDSLPTTVMSEGAR                                | 1478.6             | 2            | 3.8346 | 0.3503 |
| NDLVEALKR                                     | 1058.2             | 2            | 2.68   | 0.1008 |
| NDQDTWDYTNPNLSGQGDPSNPDKR                     | 2891.9             | 3            | 4.2667 | 0.1384 |
| NDSHVLIELHK                                   | 1305.5             | 2            | 3.3714 | 0.212  |
| NDTKEDVFNHQTAK                                | 1745.9             | 2            | 4.7888 | 0.3117 |
| NDTKEDVFNHQTAKK                               | 1874.1             | 3            | 4.9361 | 0.3819 |
| NDTSGEYKK                                     | 1042.1             | 2            | 2.6724 | 0.2341 |
| NDVAHKQLSAFGEYVAEILPK                         | 2330.6             | 3            | 4.6062 | 0.4086 |
| NDVAPTLMSVPR                                  | 1300.5             | 2            | 3.2619 | 0.279  |
| NDVLDSLGISPDLLPEDFVR                          | 2215.4             | 2            | 4.9359 | 0.4486 |
| NDVLKQEVQR                                    | 1229.4             | 2            | 2.4602 | 0.1232 |
| NDWHGGAIVSALSQTGSLFKPR                        | 2342.6             | 3            | 4.4839 | 0.4781 |
| NDYVAAER                                      | 938.0              | 2            | 2.8291 | 0.2575 |
| NEAIQAAHDAVAQEGQCR                            | 1912.0             | 2            | 5.2606 | 0.5135 |
| NEDITEPQSILAAAEK                              | 1729.9             | 2            | 4.8685 | 0.4441 |
| NEDITEPQSILAAAEKAGMSAEQAQGLLEK                | 3144.5             | 3            | 4.3142 | 0.3457 |
| NEEATKHLETSK                                  | 1387.5             | 2            | 4.2236 | 0.3522 |
| NEEDEGHSNSSPR                                 | 1458.4             | 2            | 3.7572 | 0.2106 |
| NEEEGNSEEIKAK                                 | 1477.5             | 2            | 3.6354 | 0.1978 |
| NEETLREEEEEKKQLSHPANFGPR                      | 2869.1             | 3            | 4.2274 | 0.1504 |
| NEGEDGLEVLSEFQK                               | 1842.0             | 2            | 3.1182 | 0.1693 |
| NEGSESAPEGQAQQR                               | 1588.6             | 2            | 3.9006 | 0.3437 |
| NEGVATYAAAVLFR                                | 1482.7             | 2            | 2.8226 | 0.2599 |
| NEHLQKENER                                    | 1297.4             | 2            | 2.6637 | 0.1129 |
| NEHRPASALVNPLAR                               | 1645.8             | 3            | 5.3032 | 0.34   |
| NEHTYVHSSATIPLDDPTLLFANAGMNQFKPIFLNTIDPSHPMAK | 4996.6             | 3            | 3.5555 | 0.2073 |
| NEILTAILASLTAR                                | 1486.7             | 2            | 4.5361 | 0.3615 |
| NEISEMNR                                      | 993.1              | 2            | 2.4959 | 0.1225 |
| NEKAPVDFGYVIGDSILEQMR                         | 2382.7             | 3            | 3.9486 | 0.3393 |
| NEKGQYISPFHDIPIYADKDFHMMVVEVPR                | 3546.0             | 3            | 5.5903 | 0.425  |
| NELESYAYSLK                                   | 1317.4             | 1            | 3.3559 | 0.2585 |
| NELESYAYSLKNQIGDKEK                           | 2230.4             | 2            | 4.1143 | 0.4511 |
| NELHNLLDKPQLQGIPVLVLGNK                       | 2554.0             | 3            | 5.3469 | 0.3249 |
| NELHNLLDKPQLQGIPVLVLGNKR                      | 2710.2             | 3            | 5.6893 | 0.3355 |
| NELLHFER                                      | 1058.2             | 2            | 2.6426 | 0.1306 |
| NELMYQLEQDHDLDLQAILQER                        | 2487.7             | 3            | 4.6029 | 0.248  |

| Peptide Sequence               | Peptide mass (m/z) | Charge State | Xcorr  | DelCn2 |
|--------------------------------|--------------------|--------------|--------|--------|
| NELSGALTGLTR                   | 1232.4             | 2            | 3.3312 | 0.2638 |
| NEMGHTPLDYAR                   | 1404.5             | 2            | 2.7337 | 0.3086 |
| NENEEILERPAQLANAR              | 1968.1             | 2            | 3.7584 | 0.3031 |
| NENTFLDLTVQQIEHLNK             | 2157.4             | 2            | 5.2788 | 0.4069 |
| NEPIIKVSDHSNR                  | 1509.6             | 2            | 3.7685 | 0.3608 |
| NEPQNATGAPGR                   | 1212.3             | 2            | 2.9403 | 0.3217 |
| NEQDAYAINSYTR                  | 1545.6             | 2            | 5.0662 | 0.4795 |
| NEQESAVHPR                     | 1167.2             | 2            | 2.6375 | 0.137  |
| NESHDYPHR                      | 1155.2             | 2            | 2.5641 | 0.1135 |
| NETSVIDQIGEDLLTWFSGPGECK       | 2665.8             | 2            | 2.9933 | 0.3027 |
| NEVQSLNQEMASLLQR               | 1861.1             | 2            | 3.4286 | 0.2715 |
| NEVSFVIHNLPIIAK                | 1695.0             | 2            | 4.5332 | 0.4556 |
| NEVSFVIHNLPLVLAKE              | 1681.0             | 2            | 3.5109 | 0.4186 |
| NFAALEVLREEEFSPLEK             | 1993.2             | 2            | 3.3317 | 0.2089 |
| NFAALEVLREEEFSPLEKNAEPADRDSPEK | 3202.5             | 3            | 3.2847 | 0.2067 |
| NFATSLYSMIK                    | 1275.5             | 2            | 3.5747 | 0.3138 |
| NFDGEDVDFVKIPQAIAQLSK          | 2310.6             | 3            | 4.7407 | 0.3065 |
| NFDIPKEMTGIWR                  | 1607.9             | 3            | 3.2513 | 0.251  |
| NFDKLSFLYLITGNLEK              | 2016.3             | 2            | 5.3644 | 0.4894 |
| NFEDVAFDEKKEK                  | 1342.4             | 2            | 3.2571 | 0.202  |
| NFEHLIPDAPELIHDFLVNEKEK        | 2491.8             | 3            | 6.5126 | 0.378  |
| NFELMEAEKTK                    | 1340.5             | 2            | 3.7046 | 0.2608 |
| NFEQVAFDETK                    | 1328.4             | 2            | 3.008  | 0.2799 |
| NFFTRYDYEEVEAEGANK             | 2183.3             | 3            | 4.4678 | 0.1707 |
| NFGDQPDIREK                    | 1062.1             | 2            | 2.7289 | 0.2197 |
| NFGEDMDDERK                    | 1228.2             | 2            | 2.6286 | 0.2889 |
| NFGEDMDDERLKEK                 | 1469.6             | 2            | 3.1413 | 0.2902 |
| NFGEDMDDERLKDLEFGK             | 2030.2             | 2            | 4.5155 | 0.3857 |
| NFGEEVDDESLEKELFSQFGK          | 2319.5             | 2            | 5.4415 | 0.4856 |
| NFGSALGSSGR                    | 1053.1             | 2            | 2.9268 | 0.1488 |
| NFGTDPEVTDLVHNTR               | 1815.9             | 2            | 4.9826 | 0.4727 |
| NFHIFYQLLEGGEEETLREK           | 2196.4             | 2            | 3.4425 | 0.3277 |
| NFHIFYQLLEGGEEETLRR            | 2352.6             | 2            | 3.7324 | 0.2458 |
| NFHVFYQLLSGASEELLNKEK          | 2210.5             | 3            | 6.5416 | 0.4936 |
| NFHYLIIKDGCRVPAVVFTTLREK       | 2564.0             | 3            | 3.329  | 0.2096 |
| NFHYPDPGYSR                    | 1353.4             | 2            | 2.4995 | 0.2248 |

| Peptide Sequence                       | Peptide mass (m/z) | Charge State | Xcorr  | DelCn2 |
|----------------------------------------|--------------------|--------------|--------|--------|
| NFIAQGYPYENR                           | 1309.4             | 2            | 2.7359 | 0.1464 |
| NFIAQGYPYENRTVFETLDIGWQLLR             | 2982.3             | 3            | 3.2921 | 0.2879 |
| NFILDQTNVSAAAQR                        | 1648.8             | 3            | 5.0498 | 0.3213 |
| NFILDQTNVSAAAQRR                       | 1805.0             | 2            | 2.6479 | 0.1126 |
| NFINNPLAQADWAAK                        | 1673.9             | 2            | 4.964  | 0.4035 |
| NFIVWLEDQK                             | 1292.5             | 2            | 3.492  | 0.1462 |
| NFKENVIRPILK                           | 1471.8             | 2            | 3.3984 | 0.1538 |
| NFLPILFNLYGQPVAAGDTPAPR                | 2472.8             | 3            | 4.0918 | 0.2797 |
| NFLRDLFLHHK                            | 1440.7             | 2            | 2.7376 | 0.1184 |
| NFLTQDSADLDSIEAVANEVLK                 | 2393.6             | 2            | 4.7823 | 0.3762 |
| NFLTTAIRPHGIFGPR                       | 1798.1             | 2            | 2.4599 | 0.1176 |
| NFPDLDRIVYVNEK                         | 1722.9             | 2            | 4.1232 | 0.2248 |
| NFPDLDRIVYVNEKEGGPNNHLLK               | 2783.1             | 3            | 6.6779 | 0.4221 |
| NFQEEQINTR                             | 1279.3             | 2            | 3.0863 | 0.1173 |
| NFQNIFFPSATLHLSNIPPSVSEEDLK            | 2996.3             | 3            | 3.5403 | 0.1745 |
| NFQNIFFPSATLHLSNIPPSVSEEDLKVLFSSNGGVVK | 4084.6             | 3            | 5.5771 | 0.3969 |
| NFREEPEHDFSK                           | 1535.6             | 2            | 2.8672 | 0.2306 |
| NFRKPLIVASPK                           | 1370.7             | 2            | 3.7841 | 0.2126 |
| NFRPGTENTPMIAGLGK                      | 1804.1             | 2            | 3.855  | 0.2199 |
| NFSAGGHKVGLGFELEA                      | 1733.9             | 2            | 4.0765 | 0.4235 |
| NFSDNQLQEGK                            | 1280.3             | 2            | 4.2101 | 0.2921 |
| NFSDNQLQEGKNVIGLQMGTR                  | 2464.7             | 3            | 4.7295 | 0.2985 |
| NFSGAELEGLVR                           | 1292.4             | 2            | 3.565  | 0.2577 |
| NFSGTASTSLLGPPPGLLTPPVATELSQNAR        | 3095.5             | 3            | 4.3976 | 0.3411 |
| NFSIKEIFDK                             | 1241.4             | 2            | 2.5396 | 0.171  |
| NFSIKEIFDKAISAR                        | 1740.0             | 2            | 2.5762 | 0.18   |
| NFSIVAHVDHGK                           | 1324.5             | 2            | 3.2463 | 0.3342 |
| NFTEVHPDYGSHIQALLDKYNAEKPK             | 3016.3             | 3            | 4.7065 | 0.3647 |
| NFTGRNDANPETHAFVTSPEIVTALAIAGTLK       | 3357.7             | 3            | 7.0204 | 0.5279 |
| NFTQGLVEDAPDGDASQLLHQAEVAQQEFLEVK      | 3716.0             | 3            | 5.7523 | 0.3976 |
| NFTTEQVTAMLLSK                         | 1583.8             | 2            | 4.6549 | 0.3966 |
| NFVDSPPIVDITK                          | 1461.7             | 2            | 2.6297 | 0.1324 |
| NFVEETVYLLSR                           | 1470.7             | 2            | 4.096  | 0.1708 |
| NFVENFCAITGQSLNHVLCNQSDLPAGATVPALGLSNK | 4118.6             | 3            | 4.3877 | 0.2014 |
| NFVINVVNR                              | 1075.2             | 2            | 2.8277 | 0.2453 |
| NFWVSGLSSTTR                           | 1355.5             | 2            | 3.9698 | 0.3768 |



| Peptide Sequence                | Peptide mass (m/z) | Charge State | Xcorr  | DelCn2 |
|---------------------------------|--------------------|--------------|--------|--------|
| NFYDSPEKIYER                    | 1561.7             | 2            | 3.3619 | 0.3035 |
| NFYELSPHIFALSDEAYR              | 2173.4             | 2            | 5.688  | 0.516  |
| NFYQEHPDLAR                     | 1390.5             | 2            | 3.6318 | 0.3903 |
| NFYVDGHVPKPH                    | 1410.6             | 2            | 3.8375 | 0.4224 |
| NFYVEHPEVAR                     | 1361.5             | 2            | 3.3511 | 0.4205 |
| NFYVEVPELAK                     | 1309.5             | 2            | 2.704  | 0.1603 |
| NGAGLMVNSR                      | 1019.2             | 2            | 2.9009 | 0.2905 |
| NGALDQQKDELDVR                  | 1601.7             | 2            | 4.6878 | 0.323  |
| NGAPIIMSFPHFYQADER              | 2094.3             | 2            | 5.5459 | 0.4116 |
| NGAVQTIAQR                      | 1058.2             | 2            | 3.4092 | 0.253  |
| NGDFLPTR                        | 920.0              | 2            | 2.4075 | 0.1832 |
| NGDKGHAGLAGAR                   | 1224.3             | 2            | 2.8071 | 0.1021 |
| NGDLDEVKDYVAK                   | 1466.6             | 2            | 3.9854 | 0.377  |
| NGDLDEVKDYVAKGEDVNR             | 2137.3             | 3            | 5.5988 | 0.4868 |
| NGDPFVATSIVEAIATVDR             | 1976.2             | 2            | 3.9648 | 0.3801 |
| NGDTASPKEYTAGR                  | 1467.5             | 2            | 2.629  | 0.1914 |
| NGDTASPKEYTAGREADDIVNWLK        | 2651.8             | 2            | 3.1251 | 0.2199 |
| NGDVVDKDFVGIKDEDQLEAFK          | 2480.8             | 3            | 5.6381 | 0.478  |
| NGDVVDKDFVGIKDEDQLEAFK          | 2608.9             | 3            | 7.6786 | 0.4832 |
| NGELENIKPK                      | 1142.3             | 2            | 2.9804 | 0.1528 |
| NGENGIHFLNLR                    | 1384.5             | 2            | 3.2496 | 0.307  |
| NGERIEKVEHSDLSFSK               | 1976.1             | 3            | 3.7541 | 0.1669 |
| NGESSELDLQGIR                   | 1418.5             | 2            | 3.7816 | 0.3341 |
| NGESSELDLQIRIDSDISGTLK          | 2448.6             | 2            | 4.0797 | 0.3523 |
| NGETVPIDEQFDKEK                 | 1749.9             | 2            | 3.2038 | 0.2643 |
| NGFLLDGFPR                      | 1136.3             | 2            | 3.7146 | 0.4039 |
| NGFLNLALPFFGFSEPLAAPR           | 2279.6             | 2            | 5.384  | 0.4395 |
| NGGEDGKGILGR                    | 1173.3             | 2            | 2.603  | 0.1553 |
| NGGHETDAQILELNQQLVDLKLTVDGLEKER | 3477.8             | 3            | 4.5559 | 0.332  |
| NGGHFLISIK                      | 1086.3             | 2            | 2.845  | 0.2544 |
| NGGHFVISIK                      | 1072.2             | 2            | 2.8427 | 0.3255 |
| NGGLGHMNIALLSDLTK               | 1755.0             | 2            | 5.4613 | 0.3958 |
| NGGLITLEELHQQVLK                | 1793.1             | 2            | 3.0762 | 0.1636 |
| NGGQILIADLR                     | 1170.3             | 2            | 2.9302 | 0.1903 |
| NGGVKPNIIPSYSELIYYFR            | 2331.7             | 3            | 4.2146 | 0.331  |
| NGHLQSESGAVPK                   | 1324.4             | 2            | 2.6996 | 0.1477 |

| Peptide Sequence                      | Peptide mass (m/z) | Charge State | Xcorr  | DelCn2 |
|---------------------------------------|--------------------|--------------|--------|--------|
| NGHPEIVQFLLEK                         | 1524.7             | 2            | 2.493  | 0.2423 |
| NGHVGISFVPKETGEHLVHVK                 | 2285.6             | 3            | 4.2194 | 0.356  |
| NGIIKTDKVFVEMLATDR                    | 2051.4             | 2            | 2.8029 | 0.1554 |
| NGKDLGLAFEIPPHMK                      | 1768.1             | 2            | 4.3055 | 0.3086 |
| NGKEVATDVR                            | 1089.2             | 2            | 2.9709 | 0.2201 |
| NGKGSVLPNSDKK                         | 1344.5             | 2            | 3.8612 | 0.2126 |
| NGKPVTTGVSETVFLPR                     | 1803.1             | 2            | 4.9783 | 0.479  |
| NGKPVTTGVSETVFLPREDHLFR               | 2600.9             | 2            | 3.2679 | 0.1391 |
| NGLHRPVSTDFAQYNSYGDVSGGVR             | 2697.9             | 3            | 6.0666 | 0.4528 |
| NGLLHGHTLPPFLKDEVK                    | 2066.4             | 3            | 4.2992 | 0.1752 |
| NGLQKYEYVLHPR                         | 1617.8             | 2            | 3.1994 | 0.3347 |
| NGLSFIETSALDSTNVEAAFQILTEIYR          | 3205.5             | 3            | 3.2905 | 0.1324 |
| NGLSLAALKK                            | 1015.2             | 2            | 2.9709 | 0.2233 |
| NGLVNSEVHNEDGR                        | 1540.6             | 2            | 2.6793 | 0.1524 |
| NGLWGHALLLASK                         | 1380.6             | 2            | 2.7426 | 0.1997 |
| NGNGGPGPYVGQAGTATLPR                  | 1885.0             | 2            | 3.9474 | 0.3009 |
| NGNLPEFGDAISTASK                      | 1621.7             | 2            | 3.8108 | 0.319  |
| NGPALQEAYVR                           | 1218.3             | 2            | 3.0823 | 0.2642 |
| NGPLEVAGAAVSAGHGLPAK                  | 1817.0             | 2            | 5.6172 | 0.5141 |
| NGPVEGAFSVYSDFLLYK                    | 2007.2             | 2            | 5.0231 | 0.4942 |
| NGQDLGVAFK                            | 1049.2             | 2            | 3.1543 | 0.2916 |
| NGQGFALVYSITAQSTFNDLQDLR              | 2659.9             | 3            | 4.799  | 0.3619 |
| NGQGFALVYSITAQSTFNDLQDLREQILR         | 3299.6             | 3            | 4.1234 | 0.275  |
| NGQIDKEAVQK                           | 1230.4             | 2            | 2.9095 | 0.2098 |
| NGQLIQLPVAEIVVGDIQVK                  | 2205.6             | 3            | 5.3008 | 0.4836 |
| NGQNAAVVHR                            | 1066.2             | 2            | 3.038  | 0.2046 |
| NGQTRHALLAYTLGVK                      | 1872.1             | 2            | 4.3666 | 0.3968 |
| NGQVIGIGAGQQSR                        | 1385.5             | 2            | 4.0329 | 0.438  |
| NGQVVGHVR                             | 966.1              | 2            | 2.93   | 0.2733 |
| NGQYAEASALYGR                         | 1400.5             | 2            | 2.7091 | 0.2572 |
| NGRVEIANDQGNR                         | 1556.7             | 2            | 4.1688 | 0.32   |
| NGRVEIANDQGNRITPSYVAFTPEGER           | 3105.4             | 3            | 5.3228 | 0.4231 |
| NGSEADIDEGLYSR                        | 1526.5             | 2            | 4.9266 | 0.3685 |
| NGSGGGGGSSGGGETLDDQR                  | 1822.7             | 2            | 2.6596 | 0.1129 |
| NGSGTLDLEEFLLR                        | 1451.6             | 2            | 2.4511 | 0.2636 |
| NGSITQIPILTMPNDDITHPIPDLTGYITEGQIYVDR | 4113.6             | 3            | 6.1222 | 0.399  |

| Peptide Sequence                  | Peptide mass (m/z) | Charge State | Xcorr  | DelCn2 |
|-----------------------------------|--------------------|--------------|--------|--------|
| NGSLDSPGKQDTEEDEEEDEKDKGK         | 2780.8             | 3            | 5.6601 | 0.2973 |
| NGSPAGGDAKELDSK                   | 1446.5             | 2            | 2.6233 | 0.1329 |
| NGSTLKETAIELGYLTAEQFDEWVKPK       | 3069.4             | 3            | 6.5883 | 0.4552 |
| NGTDKDAEALFK                      | 1309.4             | 2            | 2.6976 | 0.3198 |
| NGTIELMEPLDEEISGIVEVVGR           | 2500.8             | 2            | 3.5211 | 0.2448 |
| NGTQVHGTITGVDVSMNTHLK             | 2210.5             | 3            | 4.2854 | 0.3398 |
| NGVAQEPVHLDSPAIAKHQFLLTGDTQGR     | 3030.3             | 3            | 3.612  | 0.2027 |
| NGVELTSLR                         | 989.1              | 2            | 3.177  | 0.2425 |
| NGVGLEFNHLFGYGVLDAGAMVK           | 2409.7             | 3            | 5.667  | 0.5232 |
| NGVGLEPNINAGGCNFNFSFLR            | 2194.4             | 3            | 3.6838 | 0.1505 |
| NGVHFLQLELINGR                    | 1610.8             | 2            | 3.7461 | 0.3619 |
| NGVKITLPVDFVTADKFDENAK            | 2422.7             | 3            | 5.1964 | 0.4093 |
| NGVMPSHFSR                        | 1132.3             | 1            | 2.7134 | 0.336  |
| NGVNDIKNHK                        | 1139.2             | 2            | 2.6824 | 0.1967 |
| NGVQAMVEFDSVQSAQR                 | 1867.0             | 2            | 5.3859 | 0.5265 |
| NGWMEQISGK                        | 1150.3             | 2            | 3.0853 | 0.2482 |
| NGYELSPTAAANFTR                   | 1612.7             | 2            | 4.7085 | 0.4364 |
| NGYGFINR                          | 941.0              | 2            | 2.7345 | 0.3242 |
| NGYGFINRNDTKEDVFVHQTAIK           | 2667.9             | 3            | 5.1747 | 0.3415 |
| NGYGFINRNDTKEDVFVHQTAIKK          | 2796.1             | 3            | 5.7971 | 0.4274 |
| NHAAPFSK                          | 872.0              | 1            | 2.7117 | 0.2967 |
| NHAHEHFLDLGESK                    | 1634.7             | 2            | 4.1356 | 0.2734 |
| NHAVVCQGCHNAIDPEVQR               | 2091.3             | 3            | 3.2654 | 0.1792 |
| NHDHQEIAVPVANLK                   | 1685.9             | 2            | 4.1849 | 0.3913 |
| NHEEEISTLR                        | 1228.3             | 2            | 3.2349 | 0.3264 |
| NHEEEVK                           | 884.9              | 1            | 2.271  | 0.2115 |
| NHEEEVKGLQAQIASSGLTVEVDAPK        | 2751.0             | 3            | 6.3801 | 0.4533 |
| NHEEEVKGLQAQIASSGLTVEVDAPKSQDLAK  | 3393.7             | 3            | 8.4026 | 0.5365 |
| NHEGDEDDSHVR                      | 1410.3             | 2            | 3.9651 | 0.3561 |
| NHETAFAQMLR                       | 1304.5             | 2            | 2.4741 | 0.2561 |
| NHFSVPLSVYEGDTLLGTASPENEFNIPLGSYR | 3625.9             | 3            | 4.1835 | 0.2939 |
| NHGLSDEHVFEVICPSIPGYGFSEASSK      | 3008.3             | 3            | 3.5993 | 0.2119 |
| NHGVVMPDANKENTLNQLVGAAFGAAGQR     | 2981.3             | 3            | 5.5993 | 0.4852 |
| NHIHSCFSDVTCFLLPHPGLQVATSPDFDGK   | 3384.8             | 3            | 6.2842 | 0.3017 |
| NHIIKDQLASK                       | 1267.5             | 2            | 3.1436 | 0.2575 |
| NHIILQENAQHATR                    | 1645.8             | 2            | 4.7305 | 0.4237 |

| Peptide Sequence           | Peptide mass (m/z) | Charge State | Xcorr  | DelCn2 |
|----------------------------|--------------------|--------------|--------|--------|
| NHILPPMDHSTISLQMGTNK       | 2235.6             | 3            | 3.7865 | 0.3208 |
| NHIQLVK                    | 852.0              | 1            | 2.0629 | 0.1824 |
| NHLLHVFDEYK                | 1415.6             | 2            | 3.686  | 0.2874 |
| NHLLHVFDEYKR               | 1571.8             | 2            | 4.9345 | 0.5018 |
| NHLPQDSQDLVLGGDVPISIQATIAK | 2818.1             | 3            | 5.6965 | 0.2901 |
| NHLPVPNLDPDTYR             | 1651.8             | 2            | 2.8617 | 0.2332 |
| NHLTQFSPHFK                | 1356.5             | 2            | 3.2748 | 0.3684 |
| NHLVEIPPNLPSLVELR          | 2028.3             | 3            | 3.9745 | 0.2659 |
| NHNEGMVTR                  | 1058.2             | 1            | 2.3612 | 0.2893 |
| NHNSLLSLPQEPYSFSEPAQQAMR   | 2746.0             | 3            | 5.9796 | 0.4393 |
| NHNSLLSLPQEPYSFSEPAQQAMRK  | 2874.2             | 3            | 4.3194 | 0.2517 |
| NHPSFYVFNHR                | 1418.5             | 2            | 3.6344 | 0.3978 |
| NHQDPLAVAYHLIIDNR          | 1990.2             | 2            | 4.1504 | 0.39   |
| NHQDVAGVFALSSFLNK          | 1848.1             | 2            | 3.1602 | 0.1981 |
| NHQEEDLTEFLCANHVLK         | 2141.4             | 3            | 4.7909 | 0.3088 |
| NHQGPLPPVPLHLR             | 1575.8             | 2            | 3.458  | 0.2553 |
| NHQNLLDSLEQYVK             | 1701.9             | 2            | 4.6472 | 0.3812 |
| NHQSAAEYNIFEGMELR          | 2010.2             | 3            | 4.4831 | 0.2098 |
| NHSDSSTSESEVSSVSPLK        | 1978.0             | 2            | 3.1511 | 0.1243 |
| NHTDSAGTPHVSGGK            | 1465.5             | 2            | 3.062  | 0.3423 |
| NHTLQEQVTQLTEK             | 1669.8             | 2            | 5.0788 | 0.4265 |
| NHTLSELLQLR                | 1324.5             | 2            | 3.1617 | 0.3496 |
| NHVHIANPDFIWK              | 1591.8             | 2            | 3.6823 | 0.347  |
| NHVQPYIPSILEALMVPTSQGFTEVR | 2928.4             | 3            | 4.3712 | 0.2328 |
| NHVSQAIYLLTSR              | 1502.7             | 2            | 2.999  | 0.3253 |
| NHVVDISESGLITIAGGK         | 1811.0             | 2            | 4.7554 | 0.4478 |
| NHYNEEMSNLR                | 1407.5             | 2            | 2.8719 | 0.326  |
| NHYTESISVAK                | 1249.4             | 2            | 2.7411 | 0.2956 |
| NIANPTAMLLSASNMLR          | 1818.2             | 2            | 5.7306 | 0.5017 |
| NIAVGKDPLEGQR              | 1397.6             | 2            | 3.3446 | 0.2154 |
| NIDDGTSRDPYSHALVAGIDR      | 2273.4             | 3            | 3.9558 | 0.2446 |
| NIDDGTSRDPYSHALVAGIDRYPR   | 2689.9             | 3            | 3.748  | 0.2143 |
| NIDEAAKHR                  | 1054.1             | 2            | 2.4803 | 0.1866 |
| NIDEHANEDVER               | 1441.4             | 2            | 4.1137 | 0.4485 |
| NIDEKLTEAAR                | 1260.4             | 2            | 2.8303 | 0.2218 |
| NIDHMLWLEQPENIATCIALRPYPK  | 2967.5             | 3            | 4.7316 | 0.3539 |

| Peptide Sequence                    | Peptide mass (m/z) | Charge State | Xcorr  | DelCn2 |
|-------------------------------------|--------------------|--------------|--------|--------|
| NIDNPALADIYTEHAHQVVAK               | 2419.7             | 2            | 4.4976 | 0.2881 |
| NIDQAVTAALETR                       | 1402.5             | 2            | 4.0005 | 0.3479 |
| NIDRTELQTITNDPR                     | 1786.9             | 3            | 3.6787 | 0.1663 |
| NIEDVIAQGIGK                        | 1257.4             | 2            | 4.6903 | 0.3557 |
| NIEEHASADVEK                        | 1342.4             | 2            | 3.7086 | 0.3161 |
| NIEELQQQNQR                         | 1400.5             | 2            | 2.539  | 0.1427 |
| NIEIDSPYEISR                        | 1436.5             | 2            | 3.956  | 0.3166 |
| NIEIDSPYEISRAPDELHYTYLDTFGRPVIVAYKK | 4115.6             | 3            | 4.2909 | 0.2864 |
| NIELICQENEGENDPVLQR                 | 2214.4             | 3            | 4.0614 | 0.3609 |
| NIETIINTFHQYSVK                     | 1808.0             | 2            | 2.9118 | 0.2459 |
| NIFLKDQNIFVQK                       | 1607.9             | 2            | 3.9951 | 0.2616 |
| NIGENEGGIDKFSR                      | 1536.6             | 2            | 3.5335 | 0.3914 |
| NIGISAHIDSGKTTLTER                  | 1914.1             | 2            | 5.1219 | 0.4739 |
| NIHKLLDEVFFSEK                      | 1720.0             | 2            | 3.8391 | 0.2749 |
| NIHTNEEDQR                          | 1256.3             | 2            | 2.5935 | 0.1702 |
| NIIGSSPVADFSAIKELDTLNNEIVDLQR       | 3173.5             | 3            | 4.4434 | 0.4207 |
| NIIGYFEQKSDNYR                      | 1863.0             | 2            | 4.2537 | 0.402  |
| NIHGSDSVESAEK                       | 1486.6             | 2            | 3.8337 | 0.3132 |
| NIILEEGKEILVGDVGQTVDDPYATFVK        | 3064.4             | 3            | 7.8746 | 0.4717 |
| NIIQKFEKVPEGPIPPSTPK                | 2220.6             | 3            | 5.3964 | 0.322  |
| NIIVFYGSQTGTAEFFANR                 | 2118.3             | 2            | 3.9153 | 0.4692 |
| NIKHSNITFDEIVNIAR                   | 2042.3             | 2            | 5.1031 | 0.4967 |
| NIKLGIHEDSQNR                       | 1524.7             | 2            | 3.9456 | 0.3297 |
| NILAEQLQAETELFAEAEEMR               | 2436.7             | 3            | 4.1924 | 0.2411 |
| NILDFPQHVSPSK                       | 1482.7             | 2            | 2.4783 | 0.1393 |
| NILDFPQHVSPSKDIR                    | 1867.1             | 2            | 4.1679 | 0.2273 |
| NILEKHSLDASQGTATGPR                 | 1996.2             | 2            | 5.0826 | 0.4541 |
| NILFVITKPDVYK                       | 1550.9             | 2            | 4.2247 | 0.3384 |
| NILFVITKPDVYKSPASDTYIVFGEAK         | 3017.5             | 3            | 3.4192 | 0.1505 |
| NILGAQVSEAVPLPEHGVSVVFNLGNTK        | 2990.4             | 3            | 4.4278 | 0.333  |
| NILGGTVFR                           | 977.1              | 2            | 2.566  | 0.2771 |
| NILGGTVFREPIICK                     | 1661.0             | 2            | 3.954  | 0.3906 |
| NILHQQQEAILQR                       | 1520.7             | 2            | 3.9384 | 0.315  |
| NILKQGIETPEDQNDLRK                  | 2112.3             | 3            | 3.2982 | 0.1054 |
| NILLTNEQLESAR                       | 1501.7             | 2            | 4.6414 | 0.393  |
| NILLTNEQLESARK                      | 1629.8             | 2            | 3.5027 | 0.2541 |

| Peptide Sequence                         | Peptide mass (m/z) | Charge State | Xcorr  | DelCn2 |
|------------------------------------------|--------------------|--------------|--------|--------|
| NILSQIVDIDGIWEGTR                        | 1930.2             | 2            | 5.2144 | 0.4322 |
| NILVFGEDGSGK                             | 1236.4             | 2            | 2.6021 | 0.1736 |
| NILVFGEDGSGKTTLMTK                       | 1912.2             | 2            | 3.5788 | 0.31   |
| NINADEAAAMGAVYQAAALSK                    | 2080.3             | 2            | 6.153  | 0.5723 |
| NINENFGPNTEMHLVPILATAIQEELEK             | 3166.6             | 3            | 5.5635 | 0.3545 |
| NINIGDISIKVPLPSFK                        | 1970.3             | 3            | 3.6462 | 0.2363 |
| NINIGDLNIKVPNLSQ                         | 1753.0             | 2            | 4.5142 | 0.3572 |
| NINITKDLLDLLVEAK                         | 1813.1             | 2            | 5.2901 | 0.4022 |
| NINPDVLFVHNYNITTVENFQHFMDR               | 3308.6             | 3            | 3.2978 | 0.1541 |
| NIPGITLLNVSK                             | 1269.5             | 2            | 3.3309 | 0.3715 |
| NIPGITLLNVSKLNILK                        | 1851.3             | 2            | 4.869  | 0.3938 |
| NIPLLFLQINITGFMVGR                       | 1934.3             | 2            | 3.5542 | 0.3753 |
| NIPLLFLQINITGFMVGREYEAEGIAKDGAK          | 3296.8             | 3            | 3.4717 | 0.2443 |
| NIPMTLELLQSTR                            | 1516.8             | 2            | 2.9982 | 0.2142 |
| NIPPYFVALVPQEEELDDQK                     | 2345.6             | 2            | 3.8515 | 0.1323 |
| NIPPYFVALVPQEEELDDQKIQTTPPGFQLVFLPFADDKR | 4616.2             | 3            | 4.5758 | 0.3125 |
| NIQDTSDLDAIAK                            | 1404.5             | 2            | 3.6829 | 0.2806 |
| NIQDVQSQISK                              | 1260.4             | 2            | 3.1294 | 0.2293 |
| NIQKGDYDVVINDYEKAK                       | 2113.3             | 3            | 3.5854 | 0.1463 |
| NIQVDEANLLTWQGLIVPDNPPYDK                | 2854.2             | 3            | 4.1571 | 0.1626 |
| NIQVDEANLLTWQGLIVPDNPPYDKGAFR            | 3285.7             | 3            | 4.9643 | 0.27   |
| NIQVSHQEFSK                              | 1317.4             | 2            | 3.5326 | 0.301  |
| NIRDNEEKDSAFR                            | 1594.7             | 2            | 4.0184 | 0.2731 |
| NIRQEINSPTSTVVVIPSIPHPSLNHGFLAK          | 3367.8             | 3            | 4.4835 | 0.2143 |
| NISELFYYAQK                              | 1376.5             | 2            | 3.8821 | 0.3863 |
| NISFTVWDVGGQDK                           | 1566.7             | 2            | 3.6943 | 0.2842 |
| NISHYEEQLVK                              | 1360.5             | 2            | 3.1719 | 0.1772 |
| NISRLQAEIEGLKGQR                         | 1813.1             | 3            | 4.2675 | 0.3127 |
| NITLDDASAPR                              | 1173.3             | 2            | 2.9842 | 0.1841 |
| NITLNFGPQHAAHGVLRL                       | 1943.2             | 2            | 5.4704 | 0.4643 |
| NITLPHLESQSLSIQWVYNILDKK                 | 2841.3             | 3            | 3.5183 | 0.2228 |
| NITLSLVANPSHLEAVDPVVGK                   | 2402.7             | 3            | 3.9452 | 0.2659 |
| NITYLPAGQSVLLQLPQ                        | 1856.2             | 2            | 3.8712 | 0.4006 |
| NIVDHTNEQQK                              | 1326.4             | 2            | 3.2567 | 0.3142 |
| NIVEAAAVR                                | 943.1              | 2            | 3.1734 | 0.2876 |
| NIVEAAAVRDISEASVFDAYVLPK                 | 2578.9             | 3            | 4.869  | 0.3652 |

| Peptide Sequence                | Peptide mass (m/z) | Charge State | Xcorr  | DelCn2 |
|---------------------------------|--------------------|--------------|--------|--------|
| NIVEKIDFDSVSSIMASSQ             | 2071.3             | 2            | 2.6704 | 0.2221 |
| NIVHNYSEAEIK                    | 1417.5             | 2            | 3.4326 | 0.2481 |
| NIVLSGGSTMFR                    | 1282.5             | 2            | 3.4899 | 0.3133 |
| NIYGNIEDLVVHIK                  | 1627.9             | 2            | 4.3933 | 0.4084 |
| NIYSEELR                        | 1024.1             | 1            | 2.6097 | 0.1355 |
| NIYSEELRETK                     | 1382.5             | 2            | 3.0991 | 0.2867 |
| NIYVLQELDNPGAK                  | 1574.8             | 2            | 5.4229 | 0.274  |
| NIYVLQELDNPGAKR                 | 1730.9             | 2            | 4.4309 | 0.3125 |
| NKAVQLENELENFTK                 | 1778.0             | 2            | 4.1907 | 0.2377 |
| NKDGRLDLNDLAR                   | 1500.6             | 2            | 3.0413 | 0.2101 |
| NKDHPAFAPLYFPMELHR              | 2184.5             | 3            | 5.6616 | 0.4343 |
| NKDIAFLEAQIYEYVEILGEQR          | 2642.9             | 2            | 3.564  | 0.2885 |
| NKDQGTIEDYVEGLR                 | 1787.9             | 2            | 5.0046 | 0.4739 |
| NKDQGTIEDYVEGLRVFDKEGNGTVMGAEIR | 3492.8             | 3            | 5.5662 | 0.3999 |
| NKDRDDMVR                       | 1149.3             | 2            | 2.4921 | 0.1644 |
| NKDTDISIKPEGVREPDKPAPVEGK       | 2721.0             | 3            | 5.2216 | 0.3139 |
| NKDTLFQDFKR                     | 1412.6             | 2            | 3.036  | 0.3629 |
| NKDVKGALRTLILGSAAGQSHK          | 2265.6             | 2            | 2.7103 | 0.1191 |
| NKEDQYDHLDAADMTK                | 1895.0             | 2            | 5.5853 | 0.3339 |
| NKEEAAEYAK                      | 1153.2             | 1            | 2.9822 | 0.3154 |
| NKEEDLQSTKEERFPAlHK             | 2300.5             | 3            | 3.5116 | 0.1383 |
| NKEFSQTLENEKNTLLSQISTK          | 2553.8             | 3            | 4.8024 | 0.3814 |
| NKEGLHNAKEILTR                  | 1623.8             | 2            | 3.2645 | 0.2076 |
| NKEIFLRELISNASDALDKIR           | 2446.8             | 3            | 4.1229 | 0.316  |
| NKEIMFHVSTK                     | 1334.6             | 2            | 3.1511 | 0.202  |
| NKEPPAPAQQLQPQPVAVQGPEPAR       | 2649.0             | 3            | 3.5067 | 0.2119 |
| NKEPPAPAQQLQPQPVAVQGPEPARVEK    | 3005.4             | 3            | 3.4395 | 0.2138 |
| NKEQEDIVVLK                     | 1315.5             | 2            | 3.3156 | 0.1227 |
| NKEQLSDMMMINK                   | 1582.9             | 2            | 4.7224 | 0.3168 |
| NKESKDDPADETEAD                 | 1549.5             | 2            | 3.5066 | 0.3092 |
| NKETLGSEAVSSNVIDYGHASK          | 2307.5             | 3            | 5.7016 | 0.4491 |
| NKEVFIPQDGKK                    | 1403.6             | 2            | 3.63   | 0.2764 |
| NKEVTWEVLEGEVEK                 | 1790.0             | 2            | 4.6152 | 0.4069 |
| NKEVTWEVLEGEVEKEALK             | 2231.5             | 2            | 2.8683 | 0.243  |
| NKEVTWEVLEGEVEKEALKK            | 2359.7             | 3            | 5.7675 | 0.3497 |
| NKFDVDAADEK                     | 1252.3             | 2            | 3.2282 | 0.2786 |

| Peptide Sequence                      | Peptide mass (m/z) | Charge State | Xcorr  | DelCn2 |
|---------------------------------------|--------------------|--------------|--------|--------|
| NKFEEAER                              | 1023.1             | 2            | 2.564  | 0.1494 |
| NKFLIDGFPR                            | 1207.4             | 2            | 3.36   | 0.2655 |
| NKFNQVESDKLR                          | 1478.6             | 2            | 3.974  | 0.2368 |
| NKFLVLSGNLHGGSVVASYPFDDDSPEHK         | 2903.2             | 3            | 5.1908 | 0.4041 |
| NKGDSHLNVQVSNFK                       | 1687.8             | 2            | 5.2115 | 0.5005 |
| NKGIIWGEDTLMEYLENPKK                  | 2379.7             | 3            | 3.5928 | 0.2834 |
| NKGVQPLLDVLEYLELPNPSEVQNYAILNKEDDSKEK | 4073.5             | 3            | 5.0499 | 0.3346 |
| NKHEAMITDLEER                         | 1586.8             | 2            | 4.6069 | 0.3239 |
| NKHPDEDAVEAEGHEVKR                    | 2061.2             | 2            | 4.509  | 0.4432 |
| NKIAGYVTHLMK                          | 1375.7             | 2            | 3.8289 | 0.2721 |
| NKITITNDQNR                           | 1317.4             | 2            | 3.5465 | 0.2431 |
| NKITLQDVVSHSK                         | 1469.7             | 2            | 4.4904 | 0.4041 |
| NKITLQDVVSHSKK                        | 1597.8             | 2            | 4.0268 | 0.2885 |
| NKITPNLAEFASFSLYR                     | 1885.2             | 3            | 5.2426 | 0.3965 |
| NKITQSNAILR                           | 1258.5             | 2            | 2.8717 | 0.2197 |
| NKIVYPPQLPGEPR                        | 1608.9             | 2            | 2.8701 | 0.2095 |
| NKKQDGAIENR                           | 1273.4             | 2            | 2.5779 | 0.1352 |
| NKLDFLRPYTVPNK                        | 1706.0             | 2            | 2.8174 | 0.1013 |
| NKLDFLRPYTVPNKK                       | 1834.2             | 2            | 4.7054 | 0.2637 |
| NKLDHYAIIKFLTTESAMK                   | 2337.8             | 3            | 4.578  | 0.2818 |
| NKLDHYAIIKFPLTTESAMK                  | 2321.7             | 3            | 6.159  | 0.5198 |
| NKLDLETLDILQHQIR                      | 2051.3             | 3            | 4.1065 | 0.1123 |
| NKLQQLPADFGR                          | 1387.6             | 2            | 2.6838 | 0.1651 |
| NKLQSQLLSIEKEVEEYKNFRPDDPAR           | 3248.6             | 3            | 3.9051 | 0.3265 |
| NKLQSYVDAGTPMYLVIFPEGTR               | 2601.0             | 3            | 3.254  | 0.2587 |
| NKLVQTAELTK                           | 1245.5             | 2            | 2.9415 | 0.2059 |
| NKLYTDFDEIRQEIENETER                  | 2543.7             | 3            | 4.0195 | 0.307  |
| NKNAAQELATLLLSLPAPASVQQQSK            | 2722.1             | 3            | 3.9263 | 0.1908 |
| NKPLFFADKLYK                          | 1484.8             | 2            | 3.1877 | 0.2498 |
| NKQELSFYSIPEFDEWKK                    | 2289.5             | 3            | 3.7404 | 0.1956 |
| NKQEVMSIDLEER                         | 1591.8             | 2            | 4.3988 | 0.4526 |
| NKQGLETDNKELACEVK                     | 1920.1             | 2            | 4.8007 | 0.3923 |
| NKQKPITPETAEK                         | 1484.7             | 2            | 3.8204 | 0.2295 |
| NKQTYSTEPNNLK                         | 1537.7             | 2            | 4.2809 | 0.2883 |
| NKSEDSTKDDIDLALAAEIEGAGAAKEQEPQK      | 3488.7             | 3            | 5.6673 | 0.3858 |
| NKSNEDQSMGNWQIK                       | 1779.9             | 2            | 4.6505 | 0.327  |



| Peptide Sequence              | Peptide mass (m/z) | Charge State | Xcorr  | DelCn2 |
|-------------------------------|--------------------|--------------|--------|--------|
| NKSTESLQANVQR                 | 1475.6             | 2            | 4.4436 | 0.3381 |
| NKTEDLEATSEHFK                | 1649.7             | 2            | 4.4325 | 0.3684 |
| NKTGAAPIIDVVR                 | 1354.6             | 2            | 3.7361 | 0.2892 |
| NKTKENILEEFSK                 | 1580.8             | 2            | 3.9089 | 0.2983 |
| NKTLIEDEIATILK                | 1601.9             | 2            | 4.1812 | 0.2726 |
| NKTLVTQNSGVEALIHAILR          | 2178.5             | 3            | 4.6818 | 0.3552 |
| NKVEDAFYKGELR                 | 1569.7             | 2            | 3.876  | 0.3735 |
| NKVEQLKEELSSK                 | 1532.7             | 2            | 3.7989 | 0.2511 |
| NKVFGQLQGVSR                  | 1205.4             | 2            | 2.6798 | 0.1848 |
| NKVRIDQYQGADAVGLEEK           | 2134.3             | 3            | 4.6738 | 0.1902 |
| NKVSHIDVITAEMAKDFVEDDTTHG     | 2774.0             | 3            | 3.5545 | 0.3252 |
| NKYEDEINKR                    | 1309.4             | 2            | 3.2113 | 0.2026 |
| NKYEDEINKRTEMENEFVLIKK        | 2772.1             | 3            | 3.4668 | 0.1072 |
| NKYETEINITK                   | 1353.5             | 2            | 2.4905 | 0.1932 |
| NKYQELINDIAR                  | 1477.6             | 2            | 4.0017 | 0.1878 |
| NKYQIHIPLPPK                  | 1448.7             | 3            | 3.4251 | 0.2365 |
| NLAATLQDIETKR                 | 1473.7             | 2            | 2.4901 | 0.1212 |
| NLAEDRSGINLKDLVQDPSLLGGTISAYK | 3089.4             | 3            | 4.2518 | 0.3674 |
| NLANTVTEEILEK                 | 1474.6             | 2            | 4.5745 | 0.3849 |
| NLANTVTEEILEKAFSQFGKLER       | 2639.0             | 3            | 3.6478 | 0.2113 |
| NLATAYDNFVELVANLK             | 1896.1             | 2            | 5.3927 | 0.4938 |
| NLATTVTEEILEK                 | 1461.6             | 2            | 4.5053 | 0.2832 |
| NLATTVTEEILEKSFSEFGKLER       | 2642.9             | 3            | 4.6278 | 0.4102 |
| NLAVSQVVHK                    | 1095.3             | 2            | 3.2958 | 0.2556 |
| NLDAVHDITVAYPHNIPQSEK         | 2362.6             | 2            | 3.43   | 0.3316 |
| NLDAVHDITVAYPHNIPQSEKHLQGFPR  | 3426.8             | 3            | 4.871  | 0.3432 |
| NLDDGIDDERLR                  | 1431.5             | 2            | 2.9913 | 0.2133 |
| NLDFQDVLDKLDMGIAIR            | 2148.5             | 2            | 5.9126 | 0.4849 |
| NLDGISHAPNAVK                 | 1336.5             | 2            | 2.9216 | 0.2094 |
| NLDIERPTYTNLNR                | 1719.9             | 2            | 3.504  | 0.256  |
| NLDKDMYGDDLEAR                | 1655.8             | 2            | 4.3803 | 0.3096 |
| NLDKEYLPIGGLAEFCK             | 1911.2             | 3            | 4.9243 | 0.3725 |
| NLDKKDFLGKSDPFLEFFR           | 2317.6             | 3            | 4.7717 | 0.2736 |
| NLDLDSIIAEVKAQYEEIANR         | 2405.6             | 3            | 4.742  | 0.3519 |
| NLDLDSIIAEVKAQYEEIAQR         | 2419.7             | 3            | 5.4392 | 0.3952 |
| NLDPEQMSQVLDAMFEK             | 1996.3             | 2            | 4.9481 | 0.402  |

| Peptide Sequence                     | Peptide mass (m/z) | Charge State | Xcorr  | DelCn2 |
|--------------------------------------|--------------------|--------------|--------|--------|
| NLDPFLLFDEFK                         | 1498.7             | 2            | 3.2803 | 0.3263 |
| NLDQEQLSQVLDAMFER                    | 2037.2             | 3            | 5.8487 | 0.5726 |
| NLDQSGTNAVAK                         | 1147.2             | 2            | 2.95   | 0.2146 |
| NLDSEKEKELER                         | 1490.6             | 2            | 3.3787 | 0.2969 |
| NLDSLEEDLDFLRDQFTTTEVNMAR            | 2974.2             | 3            | 5.9305 | 0.5085 |
| NLDTGEEIPLSLAEEKLPTGINPLTLHIMR       | 3316.8             | 3            | 6.0662 | 0.4163 |
| NLDTVKGSSLHVGSDLLK                   | 1884.1             | 2            | 3.7265 | 0.3871 |
| NLDVQLLDTKR                          | 1315.5             | 2            | 2.9558 | 0.2178 |
| NLDYVATSIHEAVTK                      | 1661.8             | 2            | 4.6492 | 0.4137 |
| NLDYVATSIHEAVTKIQ                    | 1903.1             | 2            | 4.4596 | 0.418  |
| NLEAIVQEIKPTALIGVAAIGGAFSEQILK       | 3095.6             | 3            | 3.7599 | 0.268  |
| NLEALALDLMEPEQAVDLTLPK               | 2424.8             | 2            | 5.6848 | 0.4632 |
| NLEALALDLMEPEQAVDLTLPKVEAMNKR        | 3253.8             | 3            | 6.9256 | 0.5164 |
| NLEAQHKELEEK                         | 1468.6             | 2            | 4.0742 | 0.3274 |
| NLEAYGLDPYSVAAILQQR                  | 2122.4             | 2            | 4.3902 | 0.3241 |
| NLEEGHSSTVAAHYNELQEVGLEKR            | 2812.0             | 3            | 6.1458 | 0.4577 |
| NLEFQGPLEISR                         | 1403.6             | 2            | 2.8078 | 0.2091 |
| NLEGANQHVSK                          | 1197.3             | 2            | 3.2296 | 0.2105 |
| NLEGYVGFANLPNQVYR                    | 1955.2             | 2            | 5.3837 | 0.4397 |
| NLEGYVGFANLPNQVYRK                   | 2083.3             | 2            | 4.9905 | 0.4807 |
| NLEISIDTLMAK                         | 1348.6             | 2            | 3.4163 | 0.1021 |
| NLENDVNSLKDQLEDLKKR                  | 2272.5             | 3            | 4.8953 | 0.3855 |
| NLEPEWAAAASEVKEQTK                   | 2002.2             | 2            | 4.7088 | 0.398  |
| NLEPKYKELGEK                         | 1448.6             | 2            | 2.633  | 0.1208 |
| NLEQENQNLK                           | 1258.3             | 2            | 3.2322 | 0.1475 |
| NLEQLGGTVTNPGGSGTSSR                 | 1933.0             | 2            | 6.3476 | 0.5525 |
| NLEVLNFFNNQIEELPTQISSLQK             | 2820.1             | 3            | 6.0277 | 0.3858 |
| NLEWIAGGTWTPSALK                     | 1745.0             | 2            | 4.8046 | 0.4593 |
| NLFAFFDMAYQGFASGDGDKDAWAVR           | 2901.2             | 3            | 4.893  | 0.3488 |
| NLFFSTNIDDAIKEADLVFISVNTPTK          | 3014.4             | 3            | 4.3867 | 0.265  |
| NLFFSTNIDDAIKEADLVFISVNTPTKTYGMGK    | 3652.1             | 3            | 3.8189 | 0.2754 |
| NLFIGHFHTPK                          | 1311.5             | 2            | 3.3916 | 0.274  |
| NLGDVGEKETETEVLLLEHDVPHQPFSQAVLSFLPK | 4018.5             | 3            | 4.8594 | 0.2076 |
| NLGFSPGDREENIR                       | 1604.7             | 2            | 3.6041 | 0.2441 |
| NLGIESQVDVMQQATNAILR                 | 2201.5             | 3            | 4.9335 | 0.2957 |
| NLGIGKVSSFEEK                        | 1408.6             | 2            | 3.6453 | 0.3178 |

| Peptide Sequence                    | Peptide mass (m/z) | Charge State | Xcorr  | DelCn2 |
|-------------------------------------|--------------------|--------------|--------|--------|
| NLGIGKVSSFEEKMISDAIPELK             | 2506.9             | 3            | 4.103  | 0.2249 |
| NLGLEELGIELDPR                      | 1568.8             | 2            | 4.8503 | 0.3923 |
| NLGLYVK                             | 807.0              | 1            | 1.9405 | 0.131  |
| NLGMTDAFELGK                        | 1296.5             | 2            | 3.2716 | 0.3257 |
| NLGMTDAFELGKADFSGMSQTDLSLSK         | 2865.2             | 3            | 5.0389 | 0.3217 |
| NLGSIAK                             | 702.8              | 1            | 1.7514 | 0.1794 |
| NLGSINTELQDVQR                      | 1587.7             | 2            | 4.9787 | 0.5034 |
| NLGSLLKPGGFLVIMDALK                 | 1987.4             | 3            | 4.2546 | 0.3812 |
| NLGTALAE LR                         | 1058.2             | 2            | 3.5175 | 0.276  |
| NLGTIAK                             | 716.8              | 1            | 2.0186 | 0.1865 |
| NLHALILVNNK                         | 1249.5             | 2            | 3.1328 | 0.2337 |
| NLHGDGIALWYTR                       | 1516.7             | 2            | 3.9161 | 0.435  |
| NLHHELELGVVMGK                      | 1576.8             | 2            | 4.0213 | 0.3987 |
| NLHIPTMENGPELILR                    | 1848.2             | 3            | 4.797  | 0.3051 |
| NLHQSGFSLSGAQIDDNIPR                | 2170.3             | 2            | 6.4328 | 0.4562 |
| NLHQSGFSLSGTQVDEGVR                 | 2032.2             | 2            | 5.7819 | 0.5359 |
| NLHQSNFSLSGAQIDDNNPR                | 2228.3             | 3            | 6.6238 | 0.4528 |
| NLHSEISGK                           | 985.1              | 2            | 2.4819 | 0.1456 |
| NLHTHHFSPPLSNNQEVSAFGEDGEGDDLWLWTVR | 3936.1             | 3            | 6.4903 | 0.3705 |
| NLHVFTMNPSSSEGLKDR                  | 2045.3             | 2            | 5.2053 | 0.479  |
| NLHYFNSDSFASHPNYPYSDEY              | 2668.7             | 2            | 4.4238 | 0.3957 |
| NLIDAGVDALR                         | 1157.3             | 2            | 3.2743 | 0.2113 |
| NLIEQLEQDKGMVIAETKR                 | 2216.5             | 3            | 4.5234 | 0.3051 |
| NLIHGSDSVESAR                       | 1385.5             | 2            | 2.8991 | 0.1106 |
| NLIHGSDSVESARR                      | 1541.7             | 2            | 3.1034 | 0.2957 |
| NLIPFDQMTIEDLNEAFPETK               | 2466.7             | 2            | 5.266  | 0.4087 |
| NLISPDLGVVFLNVPENLK                 | 2082.4             | 2            | 3.6799 | 0.3979 |
| NLIYDNADNKLALVEENGIFELLR            | 2778.1             | 3            | 4.3837 | 0.1715 |
| NLKASLENSLR                         | 1245.4             | 2            | 2.9926 | 0.1858 |
| NLKASLENSLREVEAR                    | 1830.0             | 2            | 3.4638 | 0.1708 |
| NLKEDGISA AK                        | 1146.3             | 2            | 2.8092 | 0.1107 |
| NLKEDGISA AKDVK                     | 1488.7             | 2            | 4.1157 | 0.2562 |
| NLKHSVDELQK                         | 1311.5             | 2            | 2.9426 | 0.2023 |
| NLKHSVDELQKR                        | 1467.7             | 2            | 3.2254 | 0.3302 |
| NLKLGIHEDSTNR                       | 1497.6             | 2            | 3.5555 | 0.3697 |
| NLKPIKPMQFLGDEETVR                  | 2116.5             | 3            | 4.4921 | 0.3858 |

| Peptide Sequence             | Peptide mass (m/z) | Charge State | Xcorr  | DelCn2 |
|------------------------------|--------------------|--------------|--------|--------|
| NLKPIKPMQFLGDEETVRK          | 2244.6             | 2            | 4.8405 | 0.3792 |
| NLKQNLSELEQLNENLKK           | 2156.4             | 3            | 4.3756 | 0.2222 |
| NLKVTAVPTLLK                 | 1297.6             | 2            | 3.4746 | 0.1722 |
| NLLDEIASR                    | 1031.1             | 2            | 3.3627 | 0.137  |
| NLLDEIASREQEVQK              | 1772.9             | 2            | 3.4689 | 0.2223 |
| NLLESYHVPELIKDAHLLVESK       | 2548.9             | 3            | 6.0077 | 0.4629 |
| NLLGELNPSIPLLPDDILSQIR       | 2431.8             | 3            | 4.7178 | 0.3015 |
| NLLGELNPSIPLLPDDILSQIRK      | 2560.0             | 3            | 3.3103 | 0.1626 |
| NLLHQDAVDLFR                 | 1441.6             | 2            | 2.4632 | 0.1993 |
| NLLHSLQSSGIGSK               | 1441.6             | 2            | 3.6403 | 0.3593 |
| NLLHVTDGTGVGMTR              | 1514.7             | 2            | 4.1693 | 0.3871 |
| NLLHVTDGTGVGMTR EELVK        | 2113.4             | 2            | 5.22   | 0.3861 |
| NLLHVTDGTGVGMTR EELVKNLGTIAK | 2811.3             | 3            | 4.1802 | 0.4038 |
| NLLLAEVINIIK                 | 1353.7             | 2            | 4.557  | 0.3002 |
| NLLLSGAQLEASR                | 1372.6             | 2            | 4.7094 | 0.2573 |
| NLLNSVIGR                    | 986.2              | 2            | 3.232  | 0.3473 |
| NLLPATLQLIDTYASFTR           | 2038.3             | 2            | 4.3442 | 0.3442 |
| NLLQVDLTR                    | 1200.4             | 2            | 2.5098 | 0.1345 |
| NLLSEHEQLVVTLEDHK            | 2005.2             | 3            | 5.1329 | 0.3442 |
| NLLSLGHNNIVR                 | 1350.6             | 2            | 3.209  | 0.3116 |
| NLLSVAYK                     | 908.1              | 2            | 2.4654 | 0.2094 |
| NLLSVAYKNVVGAR               | 1504.8             | 2            | 3.8709 | 0.3348 |
| NLLSVAYKNVVGGR               | 1490.7             | 2            | 2.7874 | 0.2058 |
| NLLYIYPQSLNFANR              | 1827.1             | 2            | 4.2861 | 0.3623 |
| NLLYVADSYNHK                 | 1437.6             | 2            | 3.6376 | 0.2868 |
| NLMIETTEDTIKK                | 1536.8             | 2            | 3.5008 | 0.2199 |
| NLMLSTSEEMIEKEFNINIKPGAVER   | 2881.3             | 3            | 4.3183 | 0.2904 |
| NLMNAVVTQVK                  | 1217.5             | 2            | 3.677  | 0.2799 |
| NLMQLNLAHNILR                | 1550.9             | 2            | 2.5104 | 0.2414 |
| NLMTSEIHNTVK                 | 1387.6             | 2            | 3.4901 | 0.1623 |
| NLNGTLHELLR                  | 1280.5             | 2            | 3.6256 | 0.3101 |
| NLNHVSYGR                    | 1060.1             | 2            | 2.6351 | 0.2567 |
| NLNPHSTMDSILGALAPYAVLSSSNVR  | 2829.2             | 3            | 4.7819 | 0.366  |
| NLNPIFNESFAFDIPTEK           | 2097.3             | 2            | 5.0269 | 0.2963 |
| NLNPVFNETLR                  | 1317.5             | 2            | 2.5819 | 0.2231 |
| NLNTSALQLEHEHLIK             | 1861.1             | 2            | 4.0319 | 0.323  |

| Peptide Sequence                      | Peptide mass (m/z) | Charge State | Xcorr  | DelCn2 |
|---------------------------------------|--------------------|--------------|--------|--------|
| NLNYLHLDYNFNLKPVK                     | 2106.4             | 2            | 4.0081 | 0.3804 |
| NLPFDLTWQK                            | 1262.4             | 2            | 3.25   | 0.2555 |
| NLPGGQQNSSWNFSEDTVISILNTINEVIAENLEAAK | 4146.5             | 3            | 5.9467 | 0.4968 |
| NLPGLVQEGEPFSEEATLFTK                 | 2307.5             | 3            | 6.0951 | 0.4724 |
| NLPIYSEEIVEMYK                        | 1729.0             | 2            | 3.5397 | 0.4306 |
| NLPLADQGSSSHITVK                      | 1717.9             | 2            | 4.1304 | 0.4156 |
| NLPLPPPPPPR                           | 1195.4             | 2            | 2.5475 | 0.1069 |
| NLPQYVSNELLEAFSVFGQVER                | 2669.9             | 3            | 5.0714 | 0.4421 |
| NLPSLAEQGASDPPTVASR                   | 1911.1             | 2            | 5.8395 | 0.3345 |
| NLPYKITAEEMYDIFGK                     | 2033.3             | 2            | 4.636  | 0.3675 |
| NLPYKVTQDELKEVFEDAAEIR                | 2608.9             | 3            | 5.0408 | 0.3534 |
| NLQEAEEWYK                            | 1310.4             | 2            | 3.0721 | 0.2174 |
| NLQEAEEWYKSK                          | 1525.6             | 2            | 3.8813 | 0.1789 |
| NLQEEIDALESRVESIQR                    | 2130.3             | 3            | 3.6732 | 0.2038 |
| NLQEGQVTDPR                           | 1257.3             | 2            | 3.551  | 0.2825 |
| NLQEIQQAGER                           | 1286.4             | 2            | 3.8358 | 0.1515 |
| NLQEQTVQLQSELSR                       | 1773.9             | 2            | 5.1842 | 0.3512 |
| NLQEVLGEEKLKEILKER                    | 2169.5             | 2            | 4.6036 | 0.3709 |
| NLQGISSFR                             | 1022.1             | 2            | 2.7606 | 0.2713 |
| NLQIPPEDLIEMLK                        | 1654.0             | 2            | 3.3658 | 0.3062 |
| NLQLDYVDLYLIHFPVSVKPGEEVIPK           | 3127.6             | 3            | 5.2416 | 0.3789 |
| NLQLDYVDLYLIHFPVSVKPGEEVIPKDENGK      | 3671.2             | 3            | 5.513  | 0.426  |
| NLQLLMDRVDEMSQDIVK                    | 2148.5             | 3            | 4.6513 | 0.3942 |
| NLQNLLILTAIK                          | 1354.7             | 2            | 4.558  | 0.2943 |
| NLQNVDMK                              | 962.1              | 2            | 2.7747 | 0.1945 |
| NLQQQYLQINQEITELHPLKAQLQEYQDKTK       | 3785.2             | 3            | 6.3127 | 0.4019 |
| NLQSEVEGVKNIMTQNVER                   | 2189.4             | 2            | 5.4967 | 0.4175 |
| NLQTVNVNVDEN                          | 1146.2             | 2            | 3.5789 | 0.1621 |
| NLQYYDISAK                            | 1215.3             | 2            | 2.6219 | 0.1907 |
| NLRDFLLVYNR                           | 1423.6             | 2            | 2.8842 | 0.1808 |
| NLRDIDEVSSLLR                         | 1530.7             | 2            | 4.5501 | 0.3716 |
| NLRNDLLVAADSITNTMSSLVK                | 2376.7             | 3            | 3.6322 | 0.3236 |
| NLRPGDSQTAAQAR                        | 1485.6             | 2            | 2.9968 | 0.1768 |
| NLSDLIDLVP SLCEDLLSSVDQPLK            | 2728.1             | 2            | 4.2911 | 0.3308 |
| NLSDSEKELYIQHAK                       | 1775.9             | 2            | 4.7783 | 0.4192 |
| NLSDSEKELYIQHAKEDETR                  | 2406.5             | 3            | 4.1069 | 0.3047 |

| Peptide Sequence                 | Peptide mass (m/z) | Charge State | Xcorr  | DelCn2 |
|----------------------------------|--------------------|--------------|--------|--------|
| NLSDVATKQEGLESVLK                | 1832.0             | 2            | 4.9074 | 0.428  |
| NLSEIENVHGFVSHSHISPIK            | 2345.6             | 2            | 5.098  | 0.3929 |
| NLSIYDGPEQR                      | 1292.4             | 2            | 2.8586 | 0.3198 |
| NLSLEELQMR                       | 1233.4             | 2            | 2.6182 | 0.2378 |
| NLSLSGHVGFDSLDPQLVNK             | 2141.4             | 2            | 4.7298 | 0.4687 |
| NLSPGAVESDVR                     | 1244.3             | 2            | 2.5323 | 0.1762 |
| NLSPGAVESDVRGITGVDLFGTTDAVVK     | 2819.1             | 3            | 4.2555 | 0.3779 |
| NLSPVVSNELLEQAFSQFGPVEK          | 2533.8             | 2            | 5.581  | 0.4323 |
| NLSPYVSNELLEEAQFSQFGPIER         | 2640.9             | 2            | 5.0533 | 0.5312 |
| NLSQILSDREEIAHNMQSTLDDATDAWGK    | 3373.7             | 3            | 5.5595 | 0.415  |
| NLSQILSDREEIAHNMQSTLDDATDAWGKVER | 3758.1             | 3            | 5.1617 | 0.4116 |
| NLSSASQATR                       | 1035.1             | 2            | 3.4453 | 0.1469 |
| NLSSDEATNPISR                    | 1404.5             | 2            | 3.0701 | 0.1806 |
| NLSSNEAISLEEIR                   | 1575.7             | 2            | 3.1904 | 0.1547 |
| NLSSTTDDEAPR                     | 1306.3             | 2            | 3.2549 | 0.3263 |
| NLSTFAVDGK                       | 1052.2             | 2            | 2.6088 | 0.2315 |
| NLSTVMDEIHTVLK                   | 1600.9             | 2            | 3.3999 | 0.4056 |
| NLSTVMDEIHTVLKK                  | 1729.0             | 2            | 4.0683 | 0.4141 |
| NLSVKVPATTSD                     | 1232.4             | 2            | 2.6943 | 0.2276 |
| NLSYHVHK                         | 998.1              | 2            | 2.4382 | 0.137  |
| NLSYQVHR                         | 1017.1             | 2            | 2.6509 | 0.2613 |
| NLTALGLNLVASGGTAK                | 1600.8             | 2            | 5.6722 | 0.5038 |
| NLTNPNTVILIGNK                   | 1624.9             | 2            | 4.6865 | 0.3662 |
| NLTQYSWLLDGFPR                   | 1710.9             | 2            | 4.9986 | 0.4126 |
| NLVDFTFVENVVHGHILAAEQLSR         | 2710.0             | 3            | 4.2119 | 0.4453 |
| NLVDNITGQR                       | 1130.2             | 2            | 2.853  | 0.2117 |
| NLVEKTPALVNAAVTYSKPR             | 2172.5             | 3            | 4.3273 | 0.3831 |
| NLVELAELELK                      | 1271.5             | 2            | 3.3842 | 0.1739 |
| NLVELAELELKHAK                   | 1607.9             | 2            | 4.5328 | 0.4287 |
| NLVEQHIQDIVVHYTFNK               | 2198.5             | 3            | 5.3571 | 0.4358 |
| NLVKEEQEKSEK                     | 1461.6             | 2            | 3.2537 | 0.214  |
| NLVLPGIGSFTIIDGNQVSGEDAGNNFFLQR  | 3294.6             | 3            | 5.5465 | 0.4742 |
| NLVLTGFSHIDLIDLDLDTIDVSNLNR      | 2799.1             | 3            | 3.7041 | 0.2676 |
| NLVTEDVMR                        | 1077.2             | 1            | 3.1542 | 0.3113 |
| NLVTEVLGALEAK                    | 1357.6             | 2            | 4.8487 | 0.3341 |
| NLWPFVSDPAPTASSQAAVSAR           | 2273.5             | 2            | 2.6233 | 0.1031 |

| Peptide Sequence                   | Peptide mass (m/z) | Charge State | Xcorr  | DelCn2 |
|------------------------------------|--------------------|--------------|--------|--------|
| NLYKEGDLTHFNQKLEGFTLPR             | 2621.9             | 3            | 4.2004 | 0.3444 |
| NMADAMR                            | 809.0              | 1            | 2.2488 | 0.15   |
| NMAEQIIQEIYSQIQSK                  | 2024.3             | 3            | 6.427  | 0.4644 |
| NMAEQIIQEIYSQIQSKK                 | 2152.5             | 2            | 5.2472 | 0.2136 |
| NMDAIIVDSEKTGR                     | 1549.7             | 2            | 4.3531 | 0.3472 |
| NMDPLNDNIATLLHQSSDKFVSELWK         | 3017.4             | 3            | 4.4704 | 0.4088 |
| NMDPLNDNIATLLHQSSDKFVSELWKDVDR     | 3502.9             | 3            | 4.6722 | 0.4456 |
| NMGGPYGGGNYGPGGSGGSGGYGGR          | 2191.2             | 2            | 6.3382 | 0.5863 |
| NMGLYGER                           | 940.1              | 1            | 2.238  | 0.1852 |
| NMGYAAK                            | 754.9              | 1            | 2.1697 | 0.2865 |
| NMIHETNEHTLPK                      | 1564.7             | 2            | 3.544  | 0.3711 |
| NMIREQDLQLEELRQQVSTLK              | 2572.9             | 3            | 4.3794 | 0.2883 |
| NMKDAKDKLESEMEDAYHEHQANLLR         | 3117.4             | 3            | 5.3799 | 0.419  |
| NMKELTPLQAMMLR                     | 1677.1             | 2            | 2.464  | 0.2256 |
| NMLFSGTNIAAGK                      | 1324.5             | 2            | 4.0654 | 0.285  |
| NMLFSGTNITSGK                      | 1370.6             | 2            | 3.9204 | 0.3439 |
| NMLQFNLQILPK                       | 1459.8             | 2            | 4.7396 | 0.2818 |
| NMMAACDPR                          | 1009.2             | 2            | 2.4572 | 0.1457 |
| NMNKEDEGEITK                       | 1408.5             | 2            | 3.9033 | 0.2192 |
| NMQDLVEDFKNKYEDEINKR               | 2529.8             | 3            | 3.8334 | 0.1615 |
| NMQDLVEDLKNKYEDEINKR               | 2495.8             | 3            | 3.9144 | 0.1951 |
| NMQNVEHVPLSLDR                     | 1652.9             | 2            | 4.8914 | 0.3942 |
| NMSVIAHVDHGK                       | 1308.5             | 2            | 3.4405 | 0.319  |
| NMSYQGFTK                          | 1076.2             | 2            | 2.4295 | 0.1976 |
| NMTVADSGTNHDSR                     | 1505.6             | 2            | 4.1117 | 0.3509 |
| NMTVEQLLTGSPTSPTVEPEKPTR           | 2613.9             | 3            | 4.7694 | 0.3877 |
| NMVPQQALVIR                        | 1269.5             | 2            | 2.4048 | 0.2094 |
| NMVSILSSFESR                       | 1370.6             | 2            | 3.9484 | 0.4033 |
| NNAASEGVLASFFNSLLSK                | 1970.2             | 2            | 5.766  | 0.48   |
| NNALNQVVLWDK                       | 1414.6             | 2            | 3.0757 | 0.2552 |
| NNASTDYDLSDK                       | 1343.3             | 2            | 3.586  | 0.3038 |
| NNASTDYDLSDKSINPLGGFVHYGEVTNDFVMLK | 3763.1             | 3            | 3.7376 | 0.2921 |
| NNEDISIIPPLFTVSVDHR                | 2167.4             | 3            | 4.3712 | 0.2097 |
| NNEVDLLFLSELQVLHDISSLLSR           | 2756.1             | 2            | 2.7719 | 0.3489 |
| NNFAVGYR                           | 941.0              | 2            | 2.9861 | 0.3334 |
| NNFEGEVTKENLLDFIK                  | 2011.2             | 2            | 4.867  | 0.4087 |

| Peptide Sequence                   | Peptide mass (m/z) | Charge State | Xcorr  | DelCn2 |
|------------------------------------|--------------------|--------------|--------|--------|
| NNFEGEVTKENLLDFIKHNQLPLVIEFTEQTAPK | 3958.4             | 3            | 5.55   | 0.3847 |
| NNFTDFTNVR                         | 1228.3             | 2            | 3.1279 | 0.1705 |
| NNGAGYFLEHLAFK                     | 1581.8             | 2            | 4.1985 | 0.4543 |
| NNGVLFENQLLQIGVK                   | 1787.1             | 2            | 4.6086 | 0.2211 |
| NNGVVDKSLFSNVVTK                   | 1721.9             | 2            | 4.107  | 0.4081 |
| NNHHEENISSK                        | 1309.3             | 2            | 2.9589 | 0.284  |
| NNILTDHFQYSR                       | 1508.6             | 2            | 2.9958 | 0.2108 |
| NNIPYFETSAK                        | 1284.4             | 2            | 2.823  | 0.2134 |
| NNIPYFETSAKEAINVEQAFQTIAR          | 2856.1             | 3            | 4.4919 | 0.4013 |
| NNKEYLEFR                          | 1213.3             | 2            | 2.7151 | 0.1311 |
| NNKGPVKVVVGK                       | 1239.5             | 2            | 3.5523 | 0.2824 |
| NNLAGAEELFAR                       | 1305.4             | 2            | 4.5518 | 0.3759 |
| NNLAGAEELFARKFNALFAQGNYSAAK        | 3046.3             | 3            | 3.2401 | 0.1788 |
| NNLFTSSAGYR                        | 1230.3             | 2            | 3.4201 | 0.3259 |
| NNLNPVWRPFK                        | 1385.6             | 2            | 3.3415 | 0.1539 |
| NNLSFIETSALDSTNVEEAFK              | 2330.5             | 2            | 6.6154 | 0.5783 |
| NNLSFIETSALDSTNVEEAFKNILTEIYR      | 3333.6             | 3            | 3.9602 | 0.3165 |
| NNLVIFHR                           | 1013.2             | 2            | 2.7203 | 0.1521 |
| NNMQSGVNNTK                        | 1207.3             | 2            | 3.0975 | 0.1887 |
| NNMQSGVNNTKK                       | 1335.5             | 2            | 3.7385 | 0.243  |
| NNNIDAAIENIENMLTSENK               | 2248.4             | 2            | 5.4667 | 0.4474 |
| NNNLAVTSK                          | 961.1              | 2            | 2.6836 | 0.1849 |
| NNPVHLITEEDLK                      | 1522.7             | 2            | 3.7093 | 0.3352 |
| NNQITNNQR                          | 1102.1             | 2            | 3.0931 | 0.1447 |
| NNQLLHFAFR                         | 1260.4             | 2            | 2.5308 | 0.1811 |
| NNRFSTPEQAAK                       | 1363.5             | 2            | 2.8375 | 0.2298 |
| NNRPSEGPLQTR                       | 1369.5             | 2            | 2.7857 | 0.2624 |
| NNRQPYAVSELAGHQ TSAESWGTGR         | 2717.9             | 3            | 6.8626 | 0.5392 |
| NNSDKDQSLGNWR                      | 1534.6             | 2            | 3.6388 | 0.2276 |
| NNSLQTATENTQAR                     | 1548.6             | 2            | 3.4269 | 0.2006 |
| NNSNDIVNAIMELTM                    | 1679.9             | 2            | 2.901  | 0.2196 |
| NNTEDKLYNLLLLR                     | 1720.0             | 2            | 3.1839 | 0.3238 |
| NNTVGLIQLNRPK                      | 1467.7             | 2            | 3.6023 | 0.3368 |
| NNTVTPGGKPNK                       | 1227.4             | 2            | 2.7109 | 0.1435 |
| NPAMMQEMMR                         | 1239.5             | 2            | 3.4276 | 0.3959 |
| NPAVLSAASFDGR                      | 1305.4             | 2            | 3.9355 | 0.3586 |



| Peptide Sequence              | Peptide mass (m/z) | Charge State | Xcorr  | DelCn2 |
|-------------------------------|--------------------|--------------|--------|--------|
| NPDDITNEEYGEFYK               | 1834.9             | 2            | 5.5099 | 0.4618 |
| NPDDITNEEYGEFYKSLTNDWEDHLAVK  | 3344.5             | 3            | 4.4378 | 0.2672 |
| NPDDITQEEYGEFYK               | 1848.9             | 2            | 5.2246 | 0.5347 |
| NPDNLEELLNETALGALAR           | 2167.4             | 3            | 4.8193 | 0.3084 |
| NPDRVLIIGGETPEGQR             | 1854.0             | 3            | 5.4965 | 0.35   |
| NPDTQWITKPVHK                 | 1564.8             | 2            | 4.0442 | 0.3614 |
| NPEILAIAPVLLDALTDPSR          | 2119.4             | 2            | 4.8318 | 0.4016 |
| NPEISHLNNPDIMR                | 1764.0             | 2            | 4.2307 | 0.4721 |
| NPEISHMLNNPDIMR               | 1782.0             | 2            | 4.8563 | 0.4295 |
| NPESRIVVPEIKILVK              | 1835.2             | 2            | 2.7727 | 0.1049 |
| NPFGNAGLLLGEAGK               | 1458.6             | 2            | 3.7048 | 0.3874 |
| NPFLAAVTTNR                   | 1204.4             | 2            | 3.3632 | 0.2763 |
| NPGFEIIHGLLDR                 | 1481.7             | 2            | 3.7497 | 0.4103 |
| NPGVFLIHGPDEHR                | 1588.8             | 2            | 3.692  | 0.3827 |
| NPHNDRFVLSK                   | 1327.5             | 2            | 2.6324 | 0.1261 |
| NPKTDKLVNER                   | 1314.5             | 2            | 3.0692 | 0.2394 |
| NPLGSTHPEATLK                 | 1365.5             | 2            | 3.8736 | 0.439  |
| NPLIAGK                       | 712.9              | 1            | 2.3097 | 0.1455 |
| NPLPSKETIEQEK                 | 1513.7             | 2            | 3.6666 | 0.289  |
| NPLPSKETIEQEKQAGES            | 1986.1             | 2            | 3.7745 | 0.3641 |
| NPNAMLVNLEEPLASTYQDILYQAK     | 2837.2             | 2            | 4.4726 | 0.3868 |
| NPNGPYPYTLK                   | 1264.4             | 2            | 2.711  | 0.2398 |
| NPNTSEPQHLLVMK                | 1608.8             | 2            | 3.4835 | 0.3953 |
| NPPENSDSGTGKK                 | 1331.4             | 2            | 2.6261 | 0.1636 |
| NPPGFVFEFEDPR                 | 1622.8             | 2            | 3.5436 | 0.2813 |
| NPPGFVFEFEDPRDAADAVR          | 2321.5             | 2            | 3.714  | 0.3556 |
| NPPGFVFEFEDPRDAADAVRELDGR     | 2892.1             | 2            | 3.2615 | 0.2564 |
| NPPGFVFEFEDPRDAEDAVR          | 2379.5             | 2            | 3.119  | 0.1762 |
| NPPLAEALLSGDLEKFSR            | 1958.2             | 3            | 3.3269 | 0.1996 |
| NPPPAIGQFWHVTDLHLDPTYHITDDHTK | 3367.7             | 3            | 3.8519 | 0.1992 |
| NPQNSSQSADGLR                 | 1374.4             | 2            | 3.7019 | 0.3283 |
| NPQSTEPVLGGGEPFFHGHR          | 2114.3             | 2            | 4.7763 | 0.475  |
| NPSDSAVHSPFTK                 | 1387.5             | 2            | 3.1776 | 0.2878 |
| NPSGLTQYIPVLVDSFLPLLK         | 2315.7             | 2            | 3.2261 | 0.3041 |
| NPSSAAPVQSR                   | 1114.2             | 2            | 3.0609 | 0.2566 |
| NPSTVEAFDLAQSNSEHSR           | 2090.2             | 3            | 4.0365 | 0.2922 |

| Peptide Sequence                  | Peptide mass (m/z) | Charge State | Xcorr  | DelCn2 |
|-----------------------------------|--------------------|--------------|--------|--------|
| NPSVIDKQDKD                       | 1259.3             | 2            | 2.8254 | 0.2006 |
| NPTKDGDDAHEAK                     | 1398.4             | 2            | 3.2425 | 0.2292 |
| NPVHNGHALLMQDTHK                  | 1813.0             | 2            | 4.8969 | 0.5064 |
| NPVHNGHALLMQDTR                   | 1703.9             | 2            | 4.9515 | 0.4707 |
| NPVKFEGGDR                        | 1119.2             | 2            | 2.8406 | 0.1631 |
| NPVKFEGGDRDLEHLSK                 | 1942.1             | 2            | 4.2356 | 0.2991 |
| NPVTIFSLATNEMWR                   | 1780.0             | 2            | 5.1253 | 0.4449 |
| NPVWYQALTHGLNEEQR                 | 2056.2             | 2            | 5.1646 | 0.4    |
| NPWSMDENLMHISYEAGILENPK           | 2690.0             | 3            | 4.7803 | 0.2292 |
| NPWSMDENLMHISYEAGILENPKNQAPPGLYTK | 3760.2             | 3            | 5.888  | 0.4908 |
| NPYYGGESASITPLEDLYK               | 2118.3             | 2            | 5.9469 | 0.4124 |
| NPYYGGESASITPLEDLYKR              | 2274.5             | 3            | 4.2839 | 0.4137 |
| NPYYGGESSITPLEELYK                | 2148.3             | 2            | 6.0635 | 0.5144 |
| NPYYGGESSITPLEELYKR               | 2304.5             | 2            | 3.2389 | 0.1041 |
| NQAAIQGRPPYAASAEVAK               | 2072.3             | 3            | 3.5422 | 0.2001 |
| NQAHSVLLK                         | 1025.2             | 2            | 2.7869 | 0.1174 |
| NQALKEAGVFPVPR                    | 1429.6             | 2            | 3.9967 | 0.3564 |
| NQALNTDNYGHDLASVQALQR             | 2329.5             | 3            | 5.6119 | 0.4271 |
| NQALTSLAQEAQALKDEMDELK            | 2475.7             | 2            | 3.5888 | 0.3666 |
| NQALTSLAQEAQALKDEMDELKQSSER       | 3063.3             | 3            | 3.4406 | 0.2424 |
| NQASHPTATK                        | 1055.1             | 2            | 2.4918 | 0.2147 |
| NQDEESQEAPELLK                    | 1630.7             | 2            | 3.4059 | 0.1095 |
| NQDHYAVLGLGHVR                    | 1579.7             | 2            | 4.1706 | 0.4515 |
| NQDIHVFR                          | 1029.1             | 2            | 2.9    | 0.1562 |
| NQDLALSNLESIPGGYNALRR             | 2302.5             | 3            | 3.5485 | 0.2772 |
| NQDLAPNSAEQASILSLVTK              | 2100.3             | 3            | 4.8819 | 0.4615 |
| NQDNLQGWNK                        | 1217.3             | 2            | 2.4538 | 0.1282 |
| NQEQADQHSAR                       | 1156.1             | 2            | 2.7424 | 0.1932 |
| NQELLQSQLTEKDSMIENMK              | 2380.7             | 2            | 5.6884 | 0.3605 |
| NQEKEKVER                         | 1160.2             | 2            | 3.1791 | 0.1937 |
| NQEQLAAELAEFTAK                   | 1663.8             | 2            | 4.7493 | 0.4346 |
| NQEQLLTLASILR                     | 1499.7             | 2            | 4.4926 | 0.4354 |
| NQEQMKPLEEKQEEER                  | 2046.2             | 2            | 5.1093 | 0.3286 |
| NQFLDELMELEIFLAQR                 | 2110.4             | 2            | 3.4859 | 0.1879 |
| NQGACGSCWTFSTTGALESIAIATGK        | 2646.9             | 3            | 3.642  | 0.2095 |
| NQGFDVVLVDTAGR                    | 1491.6             | 2            | 3.8482 | 0.2015 |

| Peptide Sequence                   | Peptide mass (m/z) | Charge State | Xcorr  | DelCn2 |
|------------------------------------|--------------------|--------------|--------|--------|
| NQGGGLSSSGAGEGQGPK                 | 1588.6             | 2            | 4.7207 | 0.333  |
| NQGGYGGSSSSSYGSGR                  | 1695.6             | 2            | 4.9803 | 0.5776 |
| NQGIEEALKNR                        | 1272.4             | 2            | 2.7038 | 0.2165 |
| NQHFEVPFIIFYR                      | 1668.9             | 2            | 2.8124 | 0.1165 |
| NQHLVSQQKDPDTEEYRK                 | 2216.4             | 2            | 5.6905 | 0.4639 |
| NQHTLSQPLTDEHLQALFR                | 2249.5             | 3            | 5.3689 | 0.5071 |
| NQIYIQLSEVDKTKEELTEHIK             | 2660.0             | 3            | 4.4532 | 0.4432 |
| NQKDDVAQTDLLQIDPNFGSK              | 2347.5             | 3            | 3.5696 | 0.1293 |
| NQKDDVAQTDLLQIDPNFGSKEDFDSLLQSAK   | 3581.8             | 3            | 5.7131 | 0.4182 |
| NQKHPESIQGSK                       | 1353.5             | 2            | 2.5403 | 0.2055 |
| NQKVVEEAPSIFLDAETRR                | 2203.4             | 2            | 3.3443 | 0.1948 |
| NQLDQEVFLSTLSIAQLK                 | 2064.3             | 2            | 5.4584 | 0.5063 |
| NQLHDEVHQWR                        | 1462.6             | 2            | 3.6031 | 0.2227 |
| NQLKDMAIATGGAVFGEEGLTLNLEDVQPHDLGK | 3583.0             | 3            | 5.9982 | 0.5298 |
| NQLLQKEPDLR                        | 1354.5             | 2            | 3.3752 | 0.2391 |
| NQLLQKEPDLRLENVQK                  | 2066.3             | 3            | 4.148  | 0.2678 |
| NQLLQKEPDLRLENVQKFPSPMIR           | 3024.5             | 3            | 5.9277 | 0.4068 |
| NQLNPIGSLQELAIHHGWR                | 2184.4             | 2            | 5.2157 | 0.4865 |
| NQLTAMSSVLAK                       | 1263.5             | 2            | 3.3904 | 0.2346 |
| NQLTSNPENTVFDK                     | 1678.8             | 2            | 4.6592 | 0.4166 |
| NQLTSNPENTVFDKR                    | 1835.0             | 2            | 4.4575 | 0.3971 |
| NQLYESYLNFIASIR                    | 2082.3             | 2            | 2.8176 | 0.2434 |
| NQNDPLPGR                          | 1011.1             | 2            | 2.4684 | 0.1517 |
| NQNKNKENQELK                       | 1487.6             | 2            | 2.438  | 0.1469 |
| NQNKPFVPHK                         | 1397.6             | 2            | 3.4332 | 0.2726 |
| NQQITHANNTVSNFKR                   | 1873.0             | 3            | 4.8137 | 0.4278 |
| NQSESHKQAQENLHDQVQEYK              | 2506.6             | 3            | 3.6875 | 0.1007 |
| NQSFCPTVNLDKLWTLVSEQTR             | 2580.9             | 3            | 4.0412 | 0.3824 |
| NQSPVLEPVGR                        | 1196.3             | 2            | 2.8213 | 0.1311 |
| NQSQGYNQWQQGQFWGQKPWSQHYHQGY       | 3660.8             | 3            | 3.6401 | 0.2339 |
| NQVALNPQNTVFDK                     | 1659.8             | 2            | 5.3814 | 0.4195 |
| NQVALNPQNTVFDKR                    | 1816.0             | 2            | 4.5184 | 0.3984 |
| NQVAMNPTNTIFDK                     | 1664.9             | 2            | 3.5588 | 0.281  |
| NQVAMNPTNTVFDK                     | 1650.8             | 2            | 5.263  | 0.486  |
| NQVAMNPTNTVFDKR                    | 1807.0             | 2            | 4.3741 | 0.4006 |
| NQVEDLLATLEK                       | 1373.5             | 2            | 3.8074 | 0.2629 |

| Peptide Sequence                       | Peptide mass (m/z) | Charge State | Xcorr  | DelCn2 |
|----------------------------------------|--------------------|--------------|--------|--------|
| NQVTATKADGGTQVIDTK                     | 1848.0             | 2            | 5.4324 | 0.4845 |
| NQWQLSADDLKK                           | 1446.6             | 2            | 4.0018 | 0.2481 |
| NQYDNDVTWVSPQGR                        | 1779.8             | 2            | 4.47   | 0.3723 |
| NQYVPYPHAPGSQR                         | 1614.7             | 2            | 3.2432 | 0.2716 |
| NRAEQWNVNYVETSAK                       | 1910.0             | 2            | 3.8834 | 0.2899 |
| NRAETAAQR                              | 1017.1             | 2            | 2.7116 | 0.2457 |
| NRDASTLQSQK                            | 1248.3             | 2            | 2.7835 | 0.3117 |
| NRDASTLQSQKAEGTGDAK                    | 1978.1             | 3            | 3.812  | 0.349  |
| NRDHDTFLAVR                            | 1344.5             | 2            | 3.0945 | 0.4052 |
| NRSDKTDTDWR                            | 1509.5             | 2            | 3.5052 | 0.319  |
| NREEDPSLLWQVFGSATGLAR                  | 2347.6             | 3            | 3.2821 | 0.138  |
| NREEEIEQLNEVIEKLQELANIGQK              | 3096.4             | 3            | 7.1572 | 0.3251 |
| NREEEWDPEYTPK                          | 1693.8             | 2            | 3.7129 | 0.229  |
| NREELDKYWSQQIEESTTVTTQSAEVGAAETTLTELRR | 4471.8             | 3            | 4.5685 | 0.2411 |
| NREELGFRPEYSASQLK                      | 2025.2             | 2            | 3.4782 | 0.1993 |
| NRELAILLGMLDPAEKDEK                    | 2156.5             | 3            | 5.5102 | 0.3964 |
| NREPLMPSPQFIK                          | 1557.8             | 2            | 3.7661 | 0.3548 |
| NREPVQLETLSIR                          | 1555.8             | 2            | 4.1724 | 0.3899 |
| NRESYEVSLTQK                           | 1454.6             | 2            | 3.6182 | 0.1584 |
| NRETASELLMR                            | 1320.5             | 2            | 2.7947 | 0.1646 |
| NRFSLVPHNYGLVLYENK                     | 2164.5             | 3            | 4.3343 | 0.3995 |
| NRGPPPSWGR                             | 1124.2             | 2            | 2.5392 | 0.1472 |
| NRHEIAVMLLEGGANPDAK                    | 2036.3             | 2            | 4.9003 | 0.4908 |
| NRHGLVPFAFVR                           | 1413.7             | 2            | 2.4968 | 0.2834 |
| NRHPDFLPYDHAR                          | 1638.8             | 3            | 3.5843 | 0.3128 |
| NRHPNFLVVEK                            | 1353.6             | 3            | 3.2248 | 0.133  |
| NRLDYHISVQNMMR                         | 1778.1             | 2            | 3.6543 | 0.3741 |
| NRENDGATALAEAFR                        | 1748.9             | 2            | 3.9742 | 0.335  |
| NRLPGSQLAVLHIR                         | 1574.9             | 3            | 5.0054 | 0.2845 |
| NRLQQELDDLTVDLDHQR                     | 2209.4             | 3            | 7.1433 | 0.3651 |
| NRNELAETLALLK                          | 1485.7             | 2            | 3.6241 | 0.2236 |
| NRNEQESAVHPR                           | 1437.5             | 2            | 4.4234 | 0.3672 |
| NRNFYELSPHIFALSDEAYR                   | 2443.7             | 3            | 4.4328 | 0.3439 |
| NRNHLLHVDFEYKR                         | 1842.1             | 3            | 3.2958 | 0.1179 |
| NRPEDYQGGR                             | 1192.2             | 2            | 3.0551 | 0.281  |
| NRPEDYQGGRTGEAIVDAALSALR               | 2560.8             | 3            | 3.7084 | 0.3369 |

| Peptide Sequence                    | Peptide mass (m/z) | Charge State | Xcorr  | DelCn2 |
|-------------------------------------|--------------------|--------------|--------|--------|
| NRPGSALEKEVESMGAHLNAYSTR            | 2618.9             | 3            | 7.4732 | 0.4348 |
| NRPLSDEELDAMFPEGYK                  | 2112.3             | 2            | 3.6644 | 0.37   |
| NRPLSDEELDAMFPEGYKVLPPPAGYVPIR      | 3372.8             | 3            | 5.6294 | 0.3394 |
| NRPNRLIVDEAINEDNSVVLSLQPK           | 2809.1             | 3            | 3.5593 | 0.2294 |
| NRPPLPAGTNSK                        | 1252.4             | 2            | 3.2435 | 0.3711 |
| NRPSSGSLIQVVTTEGR                   | 1802.0             | 2            | 5.2807 | 0.4854 |
| NRPSVPPPPQPPGVHSAGDSSLTNTAPTASK     | 3066.3             | 3            | 5.6142 | 0.4076 |
| NRPTSISWDGLDSGK                     | 1633.7             | 2            | 4.1757 | 0.3054 |
| NRPTSISWDGLDSGKLYTLVLTDPDAPSR       | 3176.5             | 3            | 5.9584 | 0.4815 |
| NRQEVPAFTEPDTTAEVKTPFDLAK           | 2806.1             | 3            | 5.23   | 0.3994 |
| NRQEYEDIAVK                         | 1365.5             | 2            | 2.7331 | 0.1854 |
| NRSAEEGELAESK                       | 1420.5             | 2            | 3.6411 | 0.2675 |
| NRSNTPILVDGKDVMEVVK                 | 2227.5             | 3            | 3.8277 | 0.3553 |
| NRSSAVDPEPQVKLEDVLPLAFTR            | 2683.0             | 3            | 4.5563 | 0.3482 |
| NRTPSDVKELVLDNSR                    | 1844.0             | 2            | 3.9727 | 0.338  |
| NRVPSAGDVEK                         | 1172.3             | 2            | 3.0395 | 0.2308 |
| NRVQNMALYADVGGK                     | 1636.9             | 2            | 3.8244 | 0.2904 |
| NSAQIANLVSEDEAAFLASLER              | 2349.5             | 3            | 5.6171 | 0.4485 |
| NSCAADDKATEPLPK                     | 1560.7             | 2            | 3.6955 | 0.372  |
| NSCAADDKATEPLPKDCPVSSYNEWDPLEEVIVGR | 3850.2             | 3            | 5.1439 | 0.2836 |
| NSDEADLVPAKEANVK                    | 1700.8             | 2            | 4.0525 | 0.2345 |
| NSDIEQSDDSK                         | 1210.2             | 2            | 2.5337 | 0.1985 |
| NSDIEQSDDSKVK                       | 1437.5             | 2            | 3.9778 | 0.2296 |
| NSDLLLVDTTHKK                       | 1496.7             | 2            | 4.476  | 0.3592 |
| NSDMHLLDLESMGK                      | 1590.8             | 2            | 3.5369 | 0.2759 |
| NSDPALGLDDDPDAPAAQLAR               | 2123.2             | 2            | 6.2571 | 0.5065 |
| NSDRTPLVSVLLEGPPHSGK                | 2104.4             | 2            | 5.264  | 0.3575 |
| NSDSILEAIQK                         | 1218.3             | 2            | 3.8677 | 0.2792 |
| NSDSLPHR                            | 926.0              | 2            | 2.6811 | 0.1991 |
| NSDVLQSPPLDSAARDEL                  | 1830.9             | 2            | 3.9137 | 0.2336 |
| NSEGLHSAR                           | 971.0              | 2            | 2.9701 | 0.299  |
| NSEGWEQNGLYEFFR                     | 1877.0             | 2            | 2.5413 | 0.1473 |
| NSELDPPFDLFDVR                      | 1714.9             | 2            | 3.7561 | 0.3351 |
| NSEPQDEGELFQGVDP                    | 1918.0             | 3            | 4.5664 | 0.3429 |
| NSETFPTILEEAKELVGR                  | 2034.3             | 2            | 3.6229 | 0.2468 |
| NSEVYQEVQAMFDTLGIPK                 | 2170.4             | 2            | 4.9823 | 0.3538 |

| Peptide Sequence                      | Peptide mass (m/z) | Charge State | Xcorr  | DelCn2 |
|---------------------------------------|--------------------|--------------|--------|--------|
| NSFGLAAPLQVHAPLSPNQTV EISLPLSTVGSVMK  | 3773.4             | 3            | 4.6109 | 0.3768 |
| NSFGVIPSTPLAIHTPLMPNQSIDVSLPLNTLGPVMK | 3901.6             | 3            | 5.4431 | 0.4144 |
| NSFHLLR                               | 887.0              | 2            | 2.4576 | 0.1461 |
| NSFREQL EEEEEAKHNLEK                  | 2360.5             | 3            | 4.7969 | 0.2851 |
| NSFWIHQVTC LGTEPHMANCQVQVAPAR         | 3139.6             | 3            | 3.9442 | 0.2946 |
| NSGALEKENQMR                          | 1377.5             | 2            | 3.4202 | 0.3294 |
| NSGMPPGAAAI AVLPVTLDTMPNR             | 2394.8             | 2            | 5.9614 | 0.5344 |
| NSGMPPGAAAI AVLPVTLDTMPNRK            | 2523.0             | 2            | 3.5882 | 0.3953 |
| NSHLINVLMWELEK                        | 1727.0             | 2            | 3.2377 | 0.2401 |
| NSHNLNQQR                             | 1239.3             | 2            | 3.0701 | 0.1299 |
| NSHSLYLAGIFR                          | 1378.6             | 2            | 3.3642 | 0.3892 |
| NSILAQVLDQSAR                         | 1415.6             | 2            | 4.9397 | 0.3281 |
| NSILNPINSIR                           | 1241.4             | 2            | 2.6168 | 0.1891 |
| NSILTETLHR                            | 1184.3             | 2            | 3.2829 | 0.2449 |
| NSKNQGIEEALKNR                        | 1601.7             | 2            | 3.3049 | 0.1849 |
| NSKQQLSAEELDAQLDAYNAR                 | 2365.5             | 3            | 5.0047 | 0.3151 |
| NSLDDSAKK                             | 978.0              | 2            | 3.1882 | 0.2367 |
| NSLESYAFNMK                           | 1304.5             | 2            | 3.3821 | 0.2479 |
| NSLFGSVETWPWQVLSK                     | 1979.2             | 2            | 4.7606 | 0.4274 |
| NSLFTGDTLGAGQFSFQRPLLVLVDR            | 2853.2             | 3            | 5.3059 | 0.4406 |
| NSLHLLMETLNATTPHYVR                   | 2211.5             | 2            | 2.6319 | 0.1017 |
| NSLISSLEEEVSILNR                      | 1804.0             | 2            | 4.9904 | 0.3525 |
| NSLISYLEQIHR                          | 1473.7             | 2            | 3.9042 | 0.3041 |
| NSLKDLDPVQELITQVR                     | 1969.2             | 3            | 4.2051 | 0.2255 |
| NSLKEANHDGDFGITLAELR                  | 2201.4             | 3            | 4.3693 | 0.377  |
| NSLKELWLVHGR                          | 1565.8             | 3            | 4.743  | 0.4067 |
| NSLLASYIHVFR                          | 1583.8             | 2            | 3.3154 | 0.179  |
| NSLLHGYR                              | 960.1              | 2            | 2.5908 | 0.2481 |
| NSLLNGSWGSEEK                         | 1421.5             | 2            | 4.0033 | 0.3416 |
| NSLSPVQATQKPLVSK                      | 1698.0             | 2            | 3.6304 | 0.3246 |
| NSLSPVQATQKPLVSKK                     | 1826.1             | 2            | 4.0582 | 0.2828 |
| NSLTSKDPDIKAQYQQR                     | 1993.2             | 3            | 3.4581 | 0.1114 |
| NSLYDMAR                              | 970.1              | 2            | 2.5575 | 0.3364 |
| NSMFHNR                               | 906.0              | 2            | 2.6544 | 0.1987 |
| NSMIALVDNLASK                         | 1376.6             | 2            | 3.1228 | 0.2279 |
| NSMIALVDNLASKEPYVVR                   | 2184.5             | 3            | 5.3294 | 0.4935 |

| Peptide Sequence             | Peptide mass (m/z) | Charge State | Xcorr  | DelCn2 |
|------------------------------|--------------------|--------------|--------|--------|
| NSMPASSFQQQK                 | 1353.5             | 2            | 2.604  | 0.1812 |
| NSMSETVR                     | 924.0              | 1            | 2.7667 | 0.2844 |
| NSNILEDLETLR                 | 1417.5             | 2            | 4.1467 | 0.3127 |
| NSNLDRHNLQDFINIK             | 1942.1             | 2            | 3.3882 | 0.1437 |
| NSNLVGAAHEELQQSR             | 1753.9             | 2            | 5.3509 | 0.4919 |
| NSNPALNDNLEK                 | 1329.4             | 2            | 4.0138 | 0.3247 |
| NSNPALNDNLEKGLLK             | 1740.9             | 2            | 4.3488 | 0.2008 |
| NSPGSQVASNPR                 | 1214.3             | 2            | 3.5186 | 0.3432 |
| NSPLNKAEVHESYK               | 1616.8             | 2            | 3.6667 | 0.373  |
| NSPLVSR                      | 772.9              | 1            | 2.1705 | 0.1662 |
| NSPVEAVFSYLTGK               | 1512.7             | 2            | 2.7315 | 0.2526 |
| NSQEDSEDSKDKVK               | 1725.7             | 2            | 4.0328 | 0.3335 |
| NSQGEEVAQR                   | 1118.1             | 2            | 2.5593 | 0.1573 |
| NSQGSEMFGDDDKRK              | 1714.8             | 2            | 2.939  | 0.1594 |
| NSQLEQENLLK                  | 1430.5             | 2            | 3.7433 | 0.1799 |
| NSQSFFSGLFGGSSK              | 1550.7             | 2            | 4.5292 | 0.4966 |
| NSRPEANEALER                 | 1386.5             | 2            | 3.3714 | 0.2745 |
| NSSAVEQDHAK                  | 1186.2             | 2            | 3.0756 | 0.2436 |
| NSSEQELR                     | 963.0              | 2            | 2.8103 | 0.1644 |
| NSSHAGAFVIVTEEAIAK           | 1845.0             | 2            | 2.7409 | 0.33   |
| NSSLAEFVQSLSQTMGFQDQIR       | 2584.8             | 3            | 4.8462 | 0.3142 |
| NSSNKPAVTTK                  | 1147.3             | 2            | 2.7524 | 0.1966 |
| NSSQFFQSYVER                 | 1492.6             | 2            | 3.6638 | 0.3244 |
| NSSVNEGSTYHK                 | 1323.4             | 2            | 3.0221 | 0.2251 |
| NSSYFVEWIPNNVK               | 1697.9             | 2            | 4.5773 | 0.4196 |
| NSSYVHGGGLDSNGKPADAVYGQK     | 2365.5             | 3            | 5.0172 | 0.4485 |
| NSSYVHGGVDASGKPQEAVYGQNDIHHK | 2996.2             | 3            | 5.4188 | 0.3818 |
| NSTFAEEFAHSIR                | 1509.6             | 2            | 2.754  | 0.3276 |
| NSTFSEIFKK                   | 1201.4             | 2            | 2.5294 | 0.2846 |
| NSTIVFPLPIDMLQGIIGAK         | 2128.6             | 2            | 3.3398 | 0.2381 |
| NSTPSEPGSGR                  | 1089.1             | 2            | 2.4395 | 0.1052 |
| NSTSSQSQTSTASR               | 1442.4             | 2            | 3.4954 | 0.4037 |
| NSVLMSGFSHK                  | 1207.4             | 2            | 2.6731 | 0.1321 |
| NSVSNFLHSLER                 | 1403.5             | 2            | 2.6854 | 0.1059 |
| NSVSQISVLSGGK                | 1276.4             | 2            | 3.5686 | 0.3697 |
| NSVTPDMMEEMYK                | 1575.8             | 2            | 3.1708 | 0.1938 |

| Peptide Sequence              | Peptide mass (m/z) | Charge State | Xcorr  | DelCn2 |
|-------------------------------|--------------------|--------------|--------|--------|
| NSVTPDMMEEYKK                 | 1704.0             | 2            | 3.0198 | 0.2337 |
| NSVVEASEAAYK                  | 1268.4             | 2            | 3.3514 | 0.3732 |
| NSVVEASEAAYKEAFEISK           | 2073.2             | 2            | 5.7721 | 0.5345 |
| NSVVEASEAAYKEAFEISKEQMQPThPIR | 3291.6             | 3            | 4.9479 | 0.3702 |
| NSWGHNFGEEGYIR                | 1666.7             | 2            | 2.5083 | 0.1186 |
| NSYLEVLLK                     | 1079.3             | 2            | 2.9466 | 0.3438 |
| NSYVAGQYDDAASYQR              | 1808.8             | 2            | 5.0338 | 0.4613 |
| NTAELQPESGKR                  | 1330.4             | 2            | 3.6146 | 0.2933 |
| NTAKLDRETEELHHDRVTLEV GK      | 2691.9             | 3            | 4.1242 | 0.2592 |
| NTDEMVELR                     | 1107.2             | 2            | 3.5107 | 0.2218 |
| NTDKNGEELHGGKR                | 1555.6             | 2            | 3.2313 | 0.277  |
| NTDQASMPDNTAAQK               | 1592.7             | 2            | 5.2914 | 0.4233 |
| NTDQASMPDNTAAQKVSHLLGINVTDfTR | 3146.4             | 3            | 5.6965 | 0.5525 |
| NTDQASMPENTVAQK               | 1634.8             | 2            | 4.0162 | 0.3196 |
| NTDQATMPDNTAAQK               | 1606.7             | 2            | 3.9644 | 0.3721 |
| NTDVAQSPEAPK                  | 1257.3             | 2            | 3.546  | 0.2444 |
| NTDVAQSPEAPKQEAPAK            | 1882.0             | 2            | 4.7702 | 0.4216 |
| NTDVAQSPEAPKQEAPAKK           | 2010.2             | 3            | 4.4166 | 0.3572 |
| NTDVVATLKK                    | 1089.3             | 2            | 2.7157 | 0.1015 |
| NTDYTELHQQNTDLIYQTGPK         | 2480.6             | 3            | 3.3336 | 0.2304 |
| NTEAVDLITRLPK                 | 1470.7             | 2            | 3.2715 | 0.1794 |
| NTEDLTEEWLR                   | 1406.5             | 2            | 2.904  | 0.1622 |
| NTEIGFLQDALSKPHGTVK           | 2056.3             | 2            | 3.082  | 0.2983 |
| NTEKENATVAHLVGALR             | 1824.0             | 3            | 4.1459 | 0.3327 |
| NTETEESLVKR                   | 1306.4             | 2            | 3.0296 | 0.2971 |
| NTETEQRAPK                    | 1174.2             | 2            | 2.663  | 0.1938 |
| NTEYFNQLKDNSNIILLGDSQGDLR     | 2869.1             | 3            | 4.8046 | 0.3452 |
| NTFAEVTGLSPGVTTYFK            | 1995.2             | 2            | 4.3242 | 0.4254 |
| NTGHKIETDLPQIR                | 1622.8             | 2            | 4.145  | 0.3627 |
| NTGIICTIGPASR                 | 1303.5             | 2            | 4.4707 | 0.3993 |
| NTGTEAPDYLATVDVDPK            | 1907.0             | 2            | 5.3579 | 0.3959 |
| NTGVISVTTGLDR                 | 1432.6             | 2            | 3.3899 | 0.3926 |
| NTHATTHNAYDLEVIDIFK           | 2203.4             | 2            | 4.7615 | 0.4068 |
| NTHATTHNAYDLEVIDIFKIER        | 2601.9             | 3            | 3.278  | 0.2365 |
| NHTHLLLAGVFR                  | 1342.6             | 2            | 3.3438 | 0.3904 |
| NTIEETGNLAEQAR                | 1546.6             | 2            | 3.1952 | 0.3513 |



| Peptide Sequence                    | Peptide mass (m/z) | Charge State | Xcorr  | DelCn2 |
|-------------------------------------|--------------------|--------------|--------|--------|
| NTIQWLENELNR                        | 1530.7             | 2            | 4.0761 | 0.3272 |
| NTIVTSYNR                           | 1068.2             | 2            | 2.6909 | 0.1412 |
| NTKEPPLSLTIHLTSPVVR                 | 2103.5             | 2            | 2.9842 | 0.1222 |
| NTKGGDAPAAGEDA                      | 1274.3             | 2            | 3.927  | 0.3462 |
| NTKIEVLEEELR                        | 1473.7             | 2            | 3.5203 | 0.2887 |
| NTKKEGDLIAAQAR                      | 1515.7             | 2            | 4.1977 | 0.3903 |
| NTKLDDFLK                           | 1207.4             | 2            | 3.072  | 0.1084 |
| NTKLDDFLKR                          | 1363.6             | 3            | 3.5313 | 0.2742 |
| NTLFGTFHVAHSSSLDDVDHK               | 2328.5             | 3            | 4.0611 | 0.3272 |
| NTLFGTFHVAHSSSLDDVDHKILTAK          | 2855.2             | 3            | 3.3006 | 0.1086 |
| NTLIQFEDFGNHNAFR                    | 1924.1             | 2            | 3.316  | 0.2178 |
| NTLLIAGLQAR                         | 1170.4             | 2            | 4.3526 | 0.2936 |
| NTLNIDKLIETAQELKNAEIALR             | 2740.1             | 3            | 5.4924 | 0.4104 |
| NLPTKETIEQEK                        | 1531.7             | 2            | 3.5229 | 0.1915 |
| NLPTKETIEQEKR                       | 1687.9             | 3            | 3.7703 | 0.3009 |
| NLPTKETIEQEKRSEIS                   | 2104.3             | 3            | 4.0824 | 0.3123 |
| NTLSLVNDFIIR                        | 1405.6             | 2            | 2.5594 | 0.2477 |
| NTMSLLAANNLLAGLR                    | 1673.0             | 2            | 3.4051 | 0.2029 |
| NTMSLLAANNLLAGLRGEPMPSELKL          | 2755.3             | 3            | 4.0181 | 0.1375 |
| NTNGSQFFITTVPTPHLDGKHVVFQGVK        | 3183.6             | 3            | 5.4629 | 0.333  |
| NTNSVPETAPAAIPETR                   | 1768.9             | 3            | 3.4022 | 0.2482 |
| NTNSVPETAPAAIPETRR                  | 1925.1             | 2            | 2.461  | 0.2369 |
| NTPFLYDLVMTHALEWPSLTAQWLPDVTRPEGK   | 3828.3             | 3            | 4.6209 | 0.3972 |
| NTQIDNSWGSEER                       | 1536.5             | 2            | 3.7836 | 0.3579 |
| NTQIIIQEEGIPK                       | 1570.8             | 2            | 4.7157 | 0.368  |
| NTQSNEDLKQEK                        | 1434.5             | 2            | 3.407  | 0.2018 |
| NTSDVISAAC                          | 1006.1             | 2            | 2.4639 | 0.114  |
| NTSQTAAITK                          | 1136.2             | 2            | 2.6066 | 0.2971 |
| NTTHGSDSVVSASR                      | 1418.5             | 2            | 3.4997 | 0.2331 |
| NTTIPTKQTQFTTYSDNQPGVLIQVYEGER      | 3531.8             | 3            | 3.8034 | 0.2925 |
| NTVEIFKFEEAENSLHLK                  | 2262.5             | 3            | 5.747  | 0.4269 |
| NTVETEREESK                         | 1322.4             | 2            | 3.4016 | 0.1393 |
| NTVHDQEHIMEHLEGVINKPEAEMSPQELQLHYFK | 4173.6             | 3            | 5.0284 | 0.2685 |
| NTVSQSISGDPEIDKK                    | 1718.8             | 2            | 3.9589 | 0.1507 |
| NTVTLLEEALDQDRTALQK                 | 2159.4             | 2            | 3.7598 | 0.2333 |
| NTVVATGGYGR                         | 1095.2             | 2            | 3.0572 | 0.3267 |

| Peptide Sequence                   | Peptide mass (m/z) | Charge State | Xcorr  | DelCn2 |
|------------------------------------|--------------------|--------------|--------|--------|
| NTVLFVPPQQEAWVVER                  | 2015.3             | 2            | 4.7864 | 0.386  |
| NTVVPTK                            | 758.9              | 1            | 2.5492 | 0.2257 |
| NTYYASIAK                          | 1031.1             | 1            | 1.8187 | 0.112  |
| NVALEKVEELEEHVSHLTEK               | 2334.6             | 3            | 3.2253 | 0.2172 |
| NVALLSQLYHSPAR                     | 1569.8             | 2            | 4.3343 | 0.4081 |
| NVDGFSPKPVTLASLFLK                 | 1934.3             | 3            | 4.3737 | 0.4908 |
| NVDGVNYASITR                       | 1309.4             | 2            | 3.9617 | 0.3844 |
| NVDKDKPAKEDVEK                     | 1487.6             | 2            | 3.8345 | 0.245  |
| NVDKDKPAKEDVEKAK                   | 1686.8             | 3            | 3.6684 | 0.2788 |
| NVDLLSDMVQEHDEPILK                 | 2096.3             | 2            | 5.4055 | 0.4407 |
| NVDLSTFYQNR                        | 1357.5             | 2            | 3.8136 | 0.3658 |
| NVDMLSELVQEYDEPILK                 | 2136.4             | 2            | 6.0496 | 0.4916 |
| NVDMLSELVQEYDEPILKHLQDIK           | 2871.3             | 3            | 3.359  | 0.1039 |
| NVDSNLANLIMNEIVDNGTAVKFDIAGQDLAK   | 3519.9             | 3            | 4.3937 | 0.2238 |
| NVDTNQDRLVTLLEFLASTQRK             | 2578.8             | 3            | 3.9852 | 0.1477 |
| NVDVEFFKR                          | 1154.3             | 2            | 2.9128 | 0.2021 |
| NVDVNVKDEEGRALLHWACDRGHKELVTVLLQHR | 3952.5             | 3            | 3.386  | 0.1113 |
| NVDVYDKR                           | 1009.1             | 2            | 2.5575 | 0.1511 |
| NVDYLLIHGTADDNVHFQNSAQIAK          | 2785.0             | 3            | 6.2146 | 0.5001 |
| NVEAMNFADIER                       | 1409.6             | 2            | 4.3527 | 0.4419 |
| NVEELVIVLKK                        | 1284.6             | 2            | 3.1344 | 0.2417 |
| NVEGQDMLYQSLK                      | 1525.7             | 2            | 3.4632 | 0.3315 |
| NVEPFTSVLSLPYPFASEINK              | 2353.7             | 2            | 5.3366 | 0.4387 |
| NVESFASMLR                         | 1154.3             | 2            | 2.9912 | 0.3724 |
| NVESYTK                            | 840.9              | 1            | 2.1359 | 0.1261 |
| NVFDEAILAALEPPEPK                  | 1854.1             | 3            | 4.8511 | 0.3536 |
| NVFDEAILAALEPPEPKK                 | 1982.3             | 2            | 4.591  | 0.4039 |
| NVFIAQNVASLQELGGSEK                | 2005.2             | 2            | 2.689  | 0.1977 |
| NVFIIGATNRPDIIDPAILRPGR            | 2519.9             | 3            | 5.1039 | 0.4317 |
| NVGHNIYILAHQLAR                    | 1720.0             | 2            | 4.154  | 0.1189 |
| NVGQFSGFPFEK                       | 1357.5             | 2            | 3.4628 | 0.3162 |
| NVHGINFVSPVR                       | 1339.5             | 2            | 3.3644 | 0.3991 |
| NVHMNDNVLHSAFEVGAR                 | 2011.2             | 3            | 5.3438 | 0.5188 |
| NVIAETIKGQTGAILQDTVESLSK           | 2516.8             | 3            | 5.6994 | 0.4197 |
| NVIFQPVAELK                        | 1258.5             | 2            | 2.9875 | 0.229  |
| NVIFQPVAELKK                       | 1386.7             | 2            | 3.04   | 0.2218 |

| Peptide Sequence                      | Peptide mass (m/z) | Charge State | Xcorr  | DelCn2 |
|---------------------------------------|--------------------|--------------|--------|--------|
| NVIGLQMG TNR                          | 1203.4             | 2            | 3.7248 | 0.3395 |
| NVIIGPA                               | 683.8              | 1            | 1.9154 | 0.1153 |
| NVIIWGNHSSTQYPDVNHAK                  | 2281.5             | 2            | 5.9464 | 0.4492 |
| NVIKEKYGKDATNVGDEGGFAPNILENKEGLELLK   | 3805.2             | 3            | 7.6612 | 0.514  |
| NVINTFTQTAHSGR                        | 1546.7             | 2            | 4.2176 | 0.4449 |
| NVIPALELVEPIKK                        | 1563.9             | 2            | 2.9876 | 0.3031 |
| NVIQHLEMELNR                          | 1496.7             | 2            | 3.7175 | 0.4752 |
| NVIQISNDLENLR                         | 1528.7             | 2            | 4.2787 | 0.4272 |
| NVKESAAHDYTLR                         | 1504.6             | 2            | 3.3083 | 0.466  |
| NVKEVLEDFEAEDGK                       | 1722.8             | 2            | 3.0933 | 0.2659 |
| NVKG PVR                              | 769.9              | 1            | 1.8374 | 0.1729 |
| NVKG P VREGDVLTLLESER                 | 2112.4             | 3            | 4.3169 | 0.3187 |
| NVKG P VREGDVLTLLESEREAR              | 2468.8             | 3            | 3.488  | 0.3879 |
| NVKLNEDKPKETK                         | 1543.7             | 2            | 3.602  | 0.1158 |
| NVKLNEDKPKETKSEETLDEGPPKYTK           | 3119.4             | 3            | 4.6057 | 0.385  |
| NVKYELQQLEGSSDRILELDQELIKAER          | 3318.7             | 3            | 3.5085 | 0.1672 |
| NVLAPYAVPSELV LVEEIPR                 | 2209.6             | 2            | 4.3371 | 0.3129 |
| NVLDSSSDFPSSGEGATFTQSHHHLPSR          | 2999.1             | 3            | 3.8664 | 0.2128 |
| NVLGHMQQGGAPSPFDR                     | 1812.0             | 3            | 3.5118 | 0.19   |
| NVLINKDIR                             | 1085.3             | 2            | 2.8726 | 0.1748 |
| NVLITDFFG SVR                         | 1368.6             | 2            | 3.0948 | 0.2134 |
| NVLIVEDIIDTGK                         | 1429.6             | 2            | 4.2125 | 0.3387 |
| NVLIVEDIIDTGKTMQTLLSLVR               | 2573.0             | 3            | 6.9781 | 0.5159 |
| NVLLDPQLVPGGGASEMAVAHALTEK            | 2619.0             | 2            | 4.7874 | 0.4201 |
| NVLLLGEDGAGK TSLIR                    | 1757.0             | 2            | 3.8123 | 0.3664 |
| NVLSDSRPAMAPGSSHLGAPASTTTAADATPSGSLAR | 3524.8             | 3            | 6.756  | 0.4553 |
| NVLSLTNKGEVFNELVGK                    | 1962.2             | 2            | 5.4692 | 0.4556 |
| NVLTAILLLL R                          | 1239.6             | 2            | 2.6264 | 0.1825 |
| NVLTESAR                              | 890.0              | 1            | 2.3884 | 0.1721 |
| NVLVGEHNIYK                           | 1286.5             | 2            | 2.8965 | 0.3188 |
| NVMEEGKDFQPSR                         | 1537.7             | 2            | 4.007  | 0.3403 |
| NVMILTNPVA AK                         | 1271.6             | 2            | 3.4    | 0.2697 |
| NVMLLPVGSADDGAHSQNEK                  | 2083.3             | 2            | 5.401  | 0.414  |
| NVMLLPVGSADDGAHSQNEKLNRYNYIEGTK       | 3435.8             | 3            | 3.4999 | 0.1985 |
| NVMSAFGLTDDQVSGPPSAPAEDR              | 2462.6             | 3            | 4.1597 | 0.212  |
| NVNAGGHK                              | 796.9              | 1            | 1.7991 | 0.1085 |

| Peptide Sequence              | Peptide mass (m/z) | Charge State | Xcorr  | DelCn2 |
|-------------------------------|--------------------|--------------|--------|--------|
| NVNAGGHKLGLEFQA               | 1725.9             | 2            | 4.2209 | 0.4505 |
| NVNIFKFIIPNVVK                | 1646.0             | 2            | 4.2734 | 0.348  |
| NVNIQNFHISWK                  | 1500.7             | 2            | 3.6132 | 0.338  |
| NVNNEVHFFENNNFNTIANK          | 2380.5             | 3            | 4.0542 | 0.3065 |
| NVNNEVHFFENNNFNTIANKLHLQK     | 3000.3             | 3            | 4.7523 | 0.3547 |
| NVNQSLLELHK                   | 1295.5             | 2            | 3.7604 | 0.2694 |
| NVNTALNTTQIPSSIEDIFNDDR       | 2578.7             | 3            | 4.2842 | 0.3348 |
| NVNVQNFHISWK                  | 1486.7             | 2            | 3.9535 | 0.3579 |
| NVPVITGSK                     | 915.1              | 1            | 2.3079 | 0.2706 |
| NVPVITGSKDLQNVNITLR           | 2082.4             | 2            | 6.0173 | 0.5151 |
| NVPVITGSKDLQNVNLTLR           | 2082.4             | 2            | 6.3138 | 0.5403 |
| NVQAEEMVEFSSGLK               | 1668.9             | 2            | 5.3989 | 0.4369 |
| NVQDIKNVVLQTLLEGHLR           | 2077.4             | 3            | 5.4983 | 0.366  |
| NVQFVFDAVTDVIK                | 1709.0             | 2            | 2.9751 | 0.1423 |
| NVQGIIEILK                    | 1127.4             | 2            | 3.2489 | 0.2209 |
| NVQGILEVSK                    | 1087.3             | 2            | 3.0715 | 0.1725 |
| NVQLQENEIR                    | 1243.4             | 2            | 2.8621 | 0.1065 |
| NVQLSLLTER                    | 1173.3             | 2            | 2.7965 | 0.1743 |
| NVRPDYLK                      | 1005.2             | 2            | 2.7218 | 0.1023 |
| NVSAEQKDENEKAKPR              | 1844.0             | 2            | 3.0438 | 0.256  |
| NVSEELDRTPPEVSK               | 1700.8             | 2            | 4.1766 | 0.3483 |
| NVSIGIVGK                     | 887.1              | 2            | 2.4055 | 0.1607 |
| NVSNPDVIKLQEIPTFQPLLK         | 2509.9             | 3            | 3.9235 | 0.159  |
| NVSNLKPVPLIGPK                | 1476.8             | 2            | 3.2959 | 0.2309 |
| NVSSYEK                       | 826.9              | 1            | 1.901  | 0.1519 |
| NVTAIQGPGGK                   | 1042.2             | 2            | 3.3059 | 0.3381 |
| NVTELNEPLSNEER                | 1644.7             | 2            | 4.9743 | 0.4303 |
| NVTELNEPLSNEERNLLSVAYK        | 2533.8             | 2            | 3.2911 | 0.116  |
| NVTELNEPLSNEERNLLSVAYKNVVGAR  | 3130.5             | 3            | 5.6694 | 0.3901 |
| NVTGHYISPFHDIPLK              | 1839.1             | 2            | 4.4482 | 0.3831 |
| NVTGHYISPFHDIPLKVNSK          | 2267.6             | 2            | 4.8381 | 0.3566 |
| NVTGHYISPFHDIPLKVNSKEENGIPMKK | 3294.8             | 3            | 4.0672 | 0.1595 |
| NVTHIDQALQEAHR                | 1632.8             | 2            | 3.8371 | 0.3722 |
| NVTKDHIMEIFSTYGK              | 1884.1             | 2            | 5.1199 | 0.4734 |
| NVTLPVFKAPIRPDIVNFVHTNLR      | 2833.3             | 3            | 3.5171 | 0.289  |
| NVTLPVFKAPIRPDIVNFVHTNLRK     | 2961.5             | 3            | 3.8705 | 0.3806 |

| Peptide Sequence                | Peptide mass (m/z) | Charge State | Xcorr  | DelCn2 |
|---------------------------------|--------------------|--------------|--------|--------|
| NVTMETE                         | 823.9              | 1            | 2.1038 | 0.1498 |
| NVTVQPDDPISFMQLTAK              | 2005.3             | 2            | 3.5474 | 0.3692 |
| NVVEELLSGNPHIEKESAR             | 2122.3             | 2            | 2.7036 | 0.2542 |
| NVVGAR                          | 615.7              | 1            | 2.0384 | 0.1202 |
| NVVGGR                          | 601.7              | 1            | 1.9094 | 0.1173 |
| NVVHQLSVTLEDLYNGATR             | 2130.3             | 2            | 4.2528 | 0.5416 |
| NVVLPTETEVAPAKDVTLLK            | 2138.5             | 2            | 4.5482 | 0.3115 |
| NVVLPTETEVAPAKDVTLLKETER        | 2654.0             | 2            | 4.3503 | 0.472  |
| NVVLQTLEGLHR                    | 1379.6             | 2            | 3.4048 | 0.2925 |
| NVVVVVDGVR                      | 957.1              | 1            | 2.8521 | 0.1986 |
| NVVVVVDGVRTPFLLSGTSYKDLMPHDLAR  | 3201.7             | 3            | 5.7157 | 0.4566 |
| NWASGHDLQ GK                    | 1213.3             | 2            | 2.8116 | 0.1652 |
| NWDKLVGEIKEEEKNEKLEGDAALNR      | 3029.3             | 3            | 5.1642 | 0.1936 |
| NWRDPDQTDGLGLSYLSSHIANVER       | 2845.0             | 3            | 7.2632 | 0.4885 |
| NYAEAK                          | 695.7              | 1            | 2.0365 | 0.1735 |
| NYAGAYREWLEKES                  | 1716.8             | 2            | 3.6224 | 0.4011 |
| NYDESGSPR                       | 1025.0             | 2            | 2.6159 | 0.2407 |
| NYDIGAALDTIQYSK                 | 1672.8             | 2            | 3.6915 | 0.2916 |
| NYDIGAALDTIQYSKHPPPL            | 2214.5             | 2            | 3.2959 | 0.284  |
| NYDVMKDFEEMR                    | 1577.8             | 2            | 4.1245 | 0.4313 |
| NYDVMKDFEEMRK                   | 1705.9             | 2            | 4.2021 | 0.3539 |
| NYEASVDSLTFSSVVTGPAPSQEAGTK     | 2656.8             | 3            | 6.1734 | 0.5151 |
| NYEEIAKVEK                      | 1223.4             | 2            | 3.1772 | 0.2241 |
| NYEEIAKVEKLEKPLEVELR            | 2301.7             | 2            | 4.2889 | 0.3548 |
| NYEFPHLQNFVK                    | 1550.7             | 2            | 3.3485 | 0.1831 |
| NYEFPHLQNFVKEGVLVEHVK           | 2541.9             | 3            | 3.5792 | 0.2342 |
| NYFENTDILYVIDSADR               | 2162.3             | 2            | 3.7663 | 0.3922 |
| NYGILADATEQVGQHK                | 1744.9             | 2            | 3.0165 | 0.28   |
| NYGILADATEQVGQHKDAYQVILDGVK     | 2947.2             | 3            | 4.3243 | 0.2633 |
| NYGILADATEQVGQHKDAYQVILDGVKGGTK | 3290.6             | 3            | 4.0974 | 0.3403 |
| NYGSYSTQASAAAATAELLKKQEELNR     | 2916.1             | 3            | 4.1066 | 0.2095 |
| NYHATTEFLDISQLSFIHDLGPK         | 2647.9             | 3            | 3.2011 | 0.1682 |
| NYIALDDFVEITKK                  | 1669.9             | 2            | 2.9703 | 0.2045 |
| NYIEMKPHPWFFGK                  | 1795.1             | 2            | 4.4158 | 0.3663 |
| NYILDQTNVYGSAQR                 | 1742.9             | 2            | 5.1357 | 0.5154 |
| NYILSASASALWNDEVKAEQELR         | 2723.9             | 3            | 4.8077 | 0.3937 |

| Peptide Sequence                 | Peptide mass (m/z) | Charge State | Xcorr  | DelCn2 |
|----------------------------------|--------------------|--------------|--------|--------|
| NYIMDFQVGKEFEEDLTGIDDR           | 2635.8             | 3            | 4.012  | 0.2616 |
| NYIMDFQVGKEFEEDLTGIDDRK          | 2764.0             | 3            | 5.5767 | 0.5259 |
| NYIQGINLVQAK                     | 1361.6             | 2            | 3.9915 | 0.3352 |
| NYISQYSEIAIQMMMHHMQPK            | 2444.9             | 2            | 4.6429 | 0.4468 |
| NYIVEDGDIIFFK                    | 1573.8             | 2            | 4.674  | 0.3753 |
| NYKLVAAPLFELYDNAPGYGPIISSLPQLLSR | 3522.0             | 3            | 4.7968 | 0.3427 |
| NYKPVVQTTGNAR                    | 1448.6             | 2            | 3.087  | 0.1638 |
| NYKSEEEFIHINNK                   | 1765.9             | 3            | 4.5705 | 0.3395 |
| NYKSEEEFIHINNKLR                 | 2035.2             | 2            | 2.9951 | 0.2483 |
| NYLDWLTSIPWGK                    | 1593.8             | 2            | 3.9817 | 0.2196 |
| NYLGGFALSVAHGR                   | 1462.6             | 2            | 3.4764 | 0.3845 |
| NYLHYSLYDQAEK                    | 1644.8             | 2            | 4.1833 | 0.3179 |
| NYLHYSLYDQAEKLVSK                | 2072.3             | 3            | 4.0525 | 0.3581 |
| NYLLSLPHK                        | 1085.3             | 2            | 2.4355 | 0.1703 |
| NYLNQHIEHVQK                     | 1523.7             | 2            | 2.7935 | 0.2432 |
| NYLNYGEEGAPGK                    | 1412.5             | 2            | 3.9246 | 0.4275 |
| NYLNYGEEGAPGKWQQQGDLDQDK         | 2740.9             | 3            | 4.2256 | 0.4387 |
| NYLNYGEEGAPGKWQQQGDLDQDKENR      | 3140.3             | 3            | 5.789  | 0.4761 |
| NYLNYGEEGAPGKWQQQGDLDQDKENREEAR  | 3625.8             | 3            | 4.185  | 0.2646 |
| NYMSNPSYNYEIVNR                  | 1865.0             | 2            | 5.7605 | 0.4759 |
| NYNKAVEEEDKMTPEQLAIK             | 2351.6             | 2            | 4.6743 | 0.2444 |
| NYPATFWVNPQFK                    | 1612.8             | 2            | 4.2502 | 0.4083 |
| NYPEGHKAAAVLPVLDLAQR             | 2163.5             | 2            | 3.9938 | 0.2957 |
| NYPNTFWMNPQYLIK                  | 1930.2             | 2            | 3.3685 | 0.2758 |
| NYQFDLFRPQHSLFNFTK               | 2466.7             | 3            | 3.2797 | 0.2331 |
| NYQQNYQNSESGEKNEGSESAPEGQAQQR    | 3259.2             | 3            | 5.9584 | 0.459  |
| NYRQLVDTTVELANKVGAAEIIISR        | 2662.0             | 3            | 3.4085 | 0.1386 |
| NYSEGLTMHTHIVSTSNFSETSAFMPVLK    | 3230.6             | 3            | 5.2346 | 0.3227 |
| NYSVGSRLKPLSPLR                  | 1785.1             | 3            | 3.4206 | 0.3683 |
| NYSVVFPHDEPLAGR                  | 1701.9             | 2            | 2.4122 | 0.3026 |
| NYTDEAIETDDLTIK                  | 1741.8             | 2            | 5.5538 | 0.4143 |
| NYTDFVHEHNVK                     | 1503.6             | 2            | 4.0801 | 0.4    |
| NYTDNELEKISR                     | 1496.6             | 2            | 3.544  | 0.3179 |
| NYTSVYDKNLLTNK                   | 1788.0             | 2            | 4.2423 | 0.4723 |
| NYVEDIPFLSPTFNPQEVFIR            | 2526.8             | 3            | 4.7243 | 0.3967 |
| NYVEELNRHLNATVNNLQAK             | 2341.6             | 3            | 4.4903 | 0.3202 |

| Peptide Sequence                 | Peptide mass (m/z) | Charge State | Xcorr  | DelCn2 |
|----------------------------------|--------------------|--------------|--------|--------|
| NYVHFAATQVQNR                    | 1548.7             | 2            | 2.9177 | 0.3223 |
| NYYEQWGK                         | 1088.2             | 1            | 2.5786 | 0.2203 |
| PAAPPAPGPGQLTLR                  | 1443.7             | 2            | 3.4955 | 0.2667 |
| PAKYDDLKK                        | 1078.2             | 2            | 2.6453 | 0.2081 |
| PALGARLAECLLLAGDAAGAR            | 2010.4             | 2            | 2.536  | 0.1351 |
| PANKQEDEVMR                      | 1317.5             | 2            | 3.646  | 0.3378 |
| PANPDEIGNFIDENLK                 | 1786.9             | 2            | 3.7129 | 0.3935 |
| PAPAVGEAEDKENQQATSGPNQPSVR       | 2678.8             | 3            | 5.7943 | 0.4576 |
| PAPVAQPPAAAPPSAVGSSAAAPR         | 2139.4             | 3            | 3.5277 | 0.2987 |
| PAQPQEHPFASSR                    | 1452.6             | 2            | 3.9692 | 0.3697 |
| PASPPAPSGSQQGPEEEAAEALLTETVR     | 2821.0             | 2            | 4.5019 | 0.4582 |
| PAYHSSLMDPDTKLIGNMALLPIR         | 2655.1             | 3            | 5.4816 | 0.4881 |
| PDYLGADQRK                       | 1163.3             | 2            | 3.0368 | 0.2262 |
| PEEHPVLLTEAPLNPK                 | 1785.0             | 2            | 4.738  | 0.2544 |
| PEEVAIVEELGR                     | 1341.5             | 2            | 4.7871 | 0.3429 |
| PEFLEDPSVLTKDKLSELVANNVTLPAGEQRK | 3668.2             | 3            | 5.6655 | 0.3664 |
| PEHPAQPVLKAEDGIVDAANFEQFLQER     | 3150.4             | 3            | 3.5549 | 0.139  |
| PENVAPR                          | 782.9              | 1            | 2.4241 | 0.1835 |
| PEPAKSAPAPK                      | 1093.3             | 2            | 2.7844 | 0.2554 |
| PEPTKSAPAPK                      | 1123.3             | 2            | 2.7248 | 0.1893 |
| PESALLGGSEAGER                   | 1373.5             | 2            | 4.6272 | 0.4173 |
| PFLDIQKR                         | 1017.2             | 2            | 2.9634 | 0.1644 |
| PFLELDTNLPANR                    | 1500.7             | 2            | 4.3339 | 0.3896 |
| PFLELDTNLPANRVPAGLEK             | 2195.5             | 2            | 5.7105 | 0.4337 |
| PFLELDTNLPANRVPAGLEKR            | 2351.7             | 3            | 4.3931 | 0.3135 |
| PFRLDLLEDR                       | 1274.5             | 2            | 2.6152 | 0.2246 |
| PFVPNVHAAEFVPSFLR                | 1928.2             | 3            | 4.6423 | 0.2475 |
| PGDIKRGIPNYEFKLGK                | 1933.2             | 2            | 2.8354 | 0.1165 |
| PGGLLLGDVAPNFEANTTVGR            | 2099.3             | 2            | 6.4271 | 0.5281 |
| PGGYERGLEPLARRASDTLSAEVR         | 2601.9             | 3            | 3.4151 | 0.1226 |
| PGHLQEGFGCVVTNRFDQLFDDSDPFEVLK   | 3540.9             | 3            | 4.9131 | 0.3819 |
| PGIGATHSSR                       | 983.1              | 2            | 3.3694 | 0.3265 |
| PGIVELPTLEELKVDEVK               | 2009.3             | 3            | 4.9617 | 0.4829 |
| PGIVELPTLEELKVDEVKISSAVLK        | 2708.2             | 3            | 5.6354 | 0.4074 |
| PGLVDSNPAPPESQEK                 | 1665.8             | 2            | 4.4416 | 0.4161 |
| PGPTPSGTNVGSSGR                  | 1371.4             | 2            | 3.2466 | 0.3461 |

| Peptide Sequence                     | Peptide mass (m/z) | Charge State | Xcorr  | DelCn2 |
|--------------------------------------|--------------------|--------------|--------|--------|
| PGVTVKDVENQQEFVR                     | 1716.9             | 3            | 5.3459 | 0.4373 |
| PGYIPNLGECSHYRSKIHLKAGDKLQSPEGKPK    | 3650.2             | 3            | 3.8978 | 0.1057 |
| PIKVGDAIPAVEVFEGEPGNKVNLAELFK        | 3082.5             | 3            | 6.2494 | 0.4453 |
| PISQGGIHGR                           | 1022.1             | 2            | 2.7476 | 0.2883 |
| PITEMLPGILSQLGADSLTSLR               | 2313.7             | 2            | 2.9351 | 0.3227 |
| PKHEFSVDMTCGGCAEAVSR                 | 2125.4             | 3            | 5.4539 | 0.3997 |
| PKKKPTPIQLNPAPDGSVAVNGTSSAETNLEALQK  | 3503.9             | 3            | 7.5127 | 0.5318 |
| PLAGGEPVSLGSLR                       | 1353.5             | 2            | 2.4142 | 0.1096 |
| PLAKDLLHPSPEEEKPK                    | 1988.3             | 2            | 4.9156 | 0.3692 |
| PLFPHVLCHNCAVEFNFGQK                 | 2301.7             | 3            | 5.2128 | 0.451  |
| PLHISTFINELDSGFR                     | 1847.1             | 2            | 4.7157 | 0.5525 |
| PLISVYSEKGESSGK                      | 1581.7             | 2            | 4.3765 | 0.4837 |
| PLSENELLELFKMMEDMNLNEDKKAPLR         | 3479.0             | 3            | 3.491  | 0.1703 |
| PLTQVGGDHIK                          | 1165.3             | 2            | 3.4799 | 0.2615 |
| PMFIVNTNVPR                          | 1288.5             | 2            | 4.4767 | 0.4163 |
| PMIHELLTEGR                          | 1296.5             | 2            | 4.0943 | 0.3694 |
| PMPRPPLPNQQFGVSLQHLQEK               | 2640.1             | 3            | 4.124  | 0.3753 |
| PMPRPPLPNQQFGVSLQHLQEKNPQEPPIVLR     | 4026.7             | 3            | 6.0029 | 0.4681 |
| PMTLGYWNIR                           | 1251.5             | 2            | 2.4955 | 0.1122 |
| PNETNEIANANSR                        | 1430.5             | 2            | 4.5373 | 0.4319 |
| PNIVGSEHYDVAR                        | 1457.6             | 2            | 4.3114 | 0.4031 |
| PNIVLFSGSSHQDLSQR                    | 1886.1             | 3            | 3.205  | 0.1465 |
| PNSEPASLLELFNSIATQGELVR              | 2486.8             | 3            | 5.7834 | 0.5407 |
| PPSVFAEVPQAQPVLVFK                   | 1954.3             | 2            | 4.8358 | 0.5132 |
| PPYTVVYFPVR                          | 1338.6             | 2            | 3.8829 | 0.4143 |
| PQSAVPADTAAPEVGPVLRPLYMDVQATTPLDPR   | 3646.1             | 3            | 5.2473 | 0.4715 |
| PQYQTWEEFSR                          | 1471.6             | 2            | 3.9189 | 0.3112 |
| PREDHGRGYFEYIEENKYSR                 | 2546.7             | 3            | 3.8056 | 0.3245 |
| PREEVVQKEQE                          | 1371.5             | 2            | 3.3425 | 0.1689 |
| PRPDPSPEIEGDLQPATHGSR                | 2257.4             | 3            | 5.3693 | 0.4402 |
| PRPPVYDDGPAGPDAAAAGDETPDVPPELLR      | 3291.4             | 3            | 5.1357 | 0.4234 |
| PRRHPSTKLSMVGPGSGAETPPSKKAGSQKPTPEGR | 3713.2             | 3            | 3.6842 | 0.1577 |
| PSDLRPGDVSSK                         | 1258.4             | 2            | 2.6903 | 0.2769 |
| PSEELEALASLLQELR                     | 1799.0             | 2            | 5.4608 | 0.4241 |
| PSENLGQVLFGER                        | 1446.6             | 2            | 2.9268 | 0.2849 |
| PSGASTGIYEALRLR                      | 1564.7             | 2            | 4.5218 | 0.3013 |



| Peptide Sequence                      | Peptide mass (m/z) | Charge State | Xcorr  | DelCn2 |
|---------------------------------------|--------------------|--------------|--------|--------|
| PSGGMEALK                             | 890.0              | 2            | 2.4257 | 0.1584 |
| PSGNLVSVLGAEGSFVSSLVK                 | 2135.4             | 2            | 4.8764 | 0.399  |
| PSHLTNKFEDK                           | 1316.4             | 2            | 3.2105 | 0.1798 |
| PSHLTNKFEDKTVAYTEQK                   | 2237.5             | 2            | 6.0188 | 0.51   |
| PSILPSKDVKPKPIADAK                    | 1905.3             | 3            | 3.2664 | 0.1855 |
| PSKEVEEDEYK                           | 1353.4             | 2            | 3.8093 | 0.2691 |
| PSKGPLQSVQVFGR                        | 1500.7             | 2            | 3.2768 | 0.3129 |
| PSQMEHAMETMMFTFHK                     | 2084.5             | 2            | 5.9288 | 0.4463 |
| PSQVVAETR                             | 987.1              | 2            | 3.1741 | 0.2828 |
| PSSEVIKDANLYISGLPR                    | 1960.2             | 3            | 3.6367 | 0.3115 |
| PSSFFGMDRPPK                          | 1366.6             | 2            | 2.9086 | 0.2463 |
| PSYQEEAVTK                            | 1152.2             | 2            | 3.3177 | 0.2976 |
| PTGAFGKETDLLLDDSLVSIFGNRR             | 2723.0             | 3            | 4.9702 | 0.3461 |
| PTTQQSPQDEQEK                         | 1516.5             | 2            | 4.3675 | 0.2384 |
| PTTQQSPQDEQEKLLDEAIQAVK               | 2597.8             | 3            | 5.6699 | 0.4079 |
| PTVRRALSSAGPIPIR                      | 1692.0             | 3            | 3.215  | 0.1271 |
| PTWGNHTPIFR                           | 1326.5             | 2            | 3.4957 | 0.4279 |
| PVDFTGYWK                             | 1113.2             | 2            | 2.6115 | 0.1828 |
| PVDLSKWSGPLSLQEVDQPPHPLHVTYAGAAVDELGK | 4113.5             | 3            | 6.0053 | 0.4908 |
| PVGGLLPLFSSPAGGVLGGLGGGGGR            | 2307.6             | 2            | 5.1998 | 0.5105 |
| PVNSPMNKGDTEVMK                       | 1647.9             | 2            | 4.3038 | 0.4209 |
| PVPAPGGGGFSR                          | 1099.2             | 2            | 2.4113 | 0.1342 |
| PVSSAASVYAGAGGSGSR                    | 1581.7             | 2            | 6.1547 | 0.5953 |
| PVTEKDLAEDAPWKK                       | 1727.9             | 2            | 4.8515 | 0.458  |
| PYQYPALTPEQK                          | 1435.6             | 2            | 4.1985 | 0.3429 |
| PYQYPALTPEQKK                         | 1563.8             | 3            | 4.9154 | 0.4046 |
| PYQYPALTPEQKKELSDIAHR                 | 2485.8             | 3            | 4.7896 | 0.4713 |
| QAAAHTDHLRDVLR                        | 1603.8             | 2            | 2.5636 | 0.123  |
| QAAAQEERLADLASDLLLQYLLQGGAR           | 2915.3             | 3            | 5.0855 | 0.4522 |
| QAAASATQTIAAAQHAASSTPK                | 1996.2             | 2            | 5.4447 | 0.5512 |
| QAADMILLDDNFASIVTGVEEGR               | 2465.7             | 2            | 4.3138 | 0.4294 |
| QAADMILLDDNFASIVTGVEEGRLLIFDNLK       | 3437.9             | 3            | 3.4128 | 0.1606 |
| QAAKTEIEKLQMK                         | 1518.8             | 2            | 3.1887 | 0.4211 |
| QAALSAALQQSLQNAESWINR                 | 2300.5             | 3            | 4.6103 | 0.3534 |
| QAAPCVLFFDELDSIAK                     | 1868.1             | 3            | 4.4225 | 0.4206 |
| QAASGLVGQENAR                         | 1301.4             | 2            | 3.2852 | 0.3247 |

| Peptide Sequence                        | Peptide mass (m/z) | Charge State | Xcorr  | DelCn2 |
|-----------------------------------------|--------------------|--------------|--------|--------|
| QAASSLQQASLK                            | 1232.4             | 2            | 3.3179 | 0.2452 |
| QADAYVEKGILDKEEAIAIKR                   | 2377.6             | 3            | 5.0185 | 0.3366 |
| QADFVQTPITGIFGGHIR                      | 1958.2             | 2            | 2.5327 | 0.1471 |
| QADLYISEGLHPR                           | 1499.7             | 3            | 3.3272 | 0.3391 |
| QADNPHVALYQAR                           | 1483.6             | 2            | 3.3406 | 0.3831 |
| QADYVPSDQDLLR                           | 1520.6             | 2            | 3.2679 | 0.1241 |
| QAEATRQAAAQEERLADLASDLLLQYLLQGGAR       | 3571.9             | 3            | 3.3082 | 0.2071 |
| QAEIEIGKLR                              | 1310.4             | 2            | 2.5175 | 0.1797 |
| QAEIENPLEDPVTGDYVHK                     | 2155.3             | 3            | 3.6621 | 0.3236 |
| QAEMEGAVQSIQGELSK                       | 1806.0             | 2            | 5.1704 | 0.4115 |
| QAEMLDDLMEK                             | 1323.5             | 2            | 3.156  | 0.2337 |
| QAENEPQSAPK                             | 1199.3             | 2            | 2.7671 | 0.2254 |
| QAEPEEKVPHLIDHQISSGENTR                 | 2615.8             | 3            | 4.4738 | 0.1575 |
| QAEPELDLR                               | 1071.2             | 2            | 2.4961 | 0.1346 |
| QAERLFENQLVGPESIAHIGDVMFTGTADGR         | 3360.7             | 3            | 3.426  | 0.1315 |
| QAESASEAAKKYMEENDQLKK                   | 2399.6             | 3            | 3.2853 | 0.1518 |
| QAEVANQETKEDLPAENGETKTEESPASDEAGEKEAK   | 3962.1             | 3            | 3.6735 | 0.1619 |
| QAEVANQETKEDLPAENGETKTEESPASDEAGEKEAKSD | 4164.2             | 3            | 3.811  | 0.2219 |
| QAFQVFNTPDDLHLHVIYDVSHNIAK              | 3173.5             | 3            | 4.4336 | 0.3463 |
| QAFDDAIAELDTLNEDSYK                     | 2159.2             | 2            | 4.3821 | 0.4539 |
| QAFDDAIAELDTLNEDSYKDSTLIMQLLR           | 3330.7             | 3            | 4.7242 | 0.3564 |
| QAFQIGSPWR                              | 1190.3             | 1            | 3.0247 | 0.3176 |
| QAFPSSTMMEVFLQEK                        | 1975.3             | 2            | 3.7068 | 0.3236 |
| QAGAEALSQAVAR                           | 1272.4             | 2            | 2.6878 | 0.1596 |
| QAGEVTFADAHRPK                          | 1527.7             | 2            | 2.972  | 0.2851 |
| QAGEVTYADAHK                            | 1290.4             | 2            | 2.8874 | 0.3316 |
| QAGEVTYADAHKER                          | 1575.7             | 2            | 3.8807 | 0.3828 |
| QAGEVTYADAHKGR                          | 1503.6             | 2            | 3.2656 | 0.3162 |
| QAGFKESDVGFIPTSGLSGENLITR               | 2624.9             | 3            | 4.8863 | 0.2382 |
| QAGGFLGPPPPSGK                          | 1310.5             | 2            | 3.0363 | 0.2827 |
| QAGPASVPLR                              | 996.1              | 2            | 2.5891 | 0.2101 |
| QAGPASVPLRTEEEFK                        | 1759.9             | 2            | 2.59   | 0.1033 |
| QAGPASVPLRTEEEFKK                       | 1888.1             | 2            | 2.875  | 0.1537 |
| QAGVFEPTIVK                             | 1189.4             | 2            | 2.4063 | 0.18   |
| QAHILLDCGEDNVCKPKLEVSVDSDQKK            | 3113.5             | 3            | 3.5879 | 0.1878 |
| QAHLCVLASNCDEPMYVK                      | 2022.4             | 2            | 3.3192 | 0.2669 |

| Peptide Sequence                         | Peptide mass (m/z) | Charge State | Xcorr  | DelCn2 |
|------------------------------------------|--------------------|--------------|--------|--------|
| QAHVDVK                                  | 796.9              | 1            | 1.85   | 0.1175 |
| QAHVDVKFQLPI                             | 1395.6             | 2            | 2.8597 | 0.3254 |
| QAIGWNINIPALLQEK                         | 1809.1             | 2            | 2.7915 | 0.2318 |
| QAIKELPQFATGENLPR                        | 1913.2             | 2            | 3.9541 | 0.2525 |
| QAILGEHPSSFRHDGYGSHGPLLPLPSR             | 3027.3             | 3            | 3.2693 | 0.2965 |
| QAIPLDENEGIYVQDVK                        | 1932.1             | 2            | 4.7859 | 0.4791 |
| QAIVDKVPVSSSALVSSLHLLK                   | 2379.8             | 3            | 4.0335 | 0.2804 |
| QAKEEAQAEIEQYR                           | 1693.8             | 2            | 3.5254 | 0.3404 |
| QAKVLENAEGAR                             | 1286.4             | 2            | 2.5687 | 0.1411 |
| QALAEHEDELPEHFKPSQLIK                    | 2460.7             | 3            | 3.3748 | 0.3374 |
| QALAHGLK                                 | 838.0              | 1            | 1.9476 | 0.2178 |
| QALDMILDLEPDEELEDNPNQSDLIEQAAEMLYGLIHAR  | 4454.9             | 3            | 4.3684 | 0.2686 |
| QALHSGQNQLKEMAIPVLEAR                    | 2334.7             | 3            | 4.0108 | 0.3531 |
| QALHSLELHYQAFLR                          | 1827.1             | 2            | 3.74   | 0.3712 |
| QALLKQGQDNLSSVK                          | 1629.8             | 2            | 3.6946 | 0.3134 |
| QALMEQQQR                                | 1132.3             | 2            | 2.664  | 0.1209 |
| QALNEHFQSILQTL EEQVSGER                  | 2557.8             | 3            | 3.4386 | 0.2072 |
| QALNTDYLDSDYQR                           | 1702.8             | 2            | 4.0263 | 0.4035 |
| QALQDLLSEYMGNAGR                         | 1767.0             | 2            | 4.6033 | 0.4275 |
| QALQDLLSEYMGNAGRK                        | 1895.1             | 3            | 3.8768 | 0.2455 |
| QALSYQNADSYHHHTSPQHLLQIR                 | 2846.1             | 3            | 4.0784 | 0.2658 |
| QALVEFEDVLGACNAVNYAADNQIYIAGHPAFVNYSTSQK | 4333.7             | 3            | 3.5983 | 0.3371 |
| QALVGQPASLTVTTK                          | 1514.7             | 2            | 2.5393 | 0.2045 |
| QAMLENASDIKLEK                           | 1590.8             | 2            | 3.2358 | 0.3034 |
| QANTGLFNLR                               | 1134.3             | 2            | 2.6226 | 0.2284 |
| QAPAGSPRGLRKGAAPARERRGR                  | 2416.7             | 3            | 3.211  | 0.1363 |
| QAPGLLWDASHQQEQPTSSSHHGAGAVEIR           | 3253.4             | 3            | 4.1693 | 0.2886 |
| QAPQTIHLPSGEILDVFDAAER                   | 2408.7             | 3            | 4.117  | 0.3479 |
| QAPQTIHLPSGEILDVFDAAERYQQAGLPLIVLAGK     | 3861.4             | 3            | 3.4427 | 0.1983 |
| QAQAAVLAVLPR                             | 1237.5             | 2            | 3.3444 | 0.2599 |
| QAQEYEALLNIK                             | 1420.6             | 2            | 4.0398 | 0.3022 |
| QAQIEVPSASALIK                           | 1668.0             | 2            | 4.4526 | 0.3001 |
| QAQILASEAEKAEQINQAAGEASAVLAK             | 2841.1             | 3            | 6.9757 | 0.5083 |
| QAQIPLAAVIKPFATIPSNESPLYLVNHGEGSPVR      | 3716.2             | 3            | 5.8592 | 0.5421 |
| QAQLAQLTQQEQASQGLR                       | 2127.3             | 2            | 4.7848 | 0.4278 |
| QAQQDRDEMADEVANGNLSK                     | 2220.3             | 3            | 4.6206 | 0.2833 |

| Peptide Sequence                               | Peptide mass (m/z) | Charge State | Xcorr  | DelCn2 |
|------------------------------------------------|--------------------|--------------|--------|--------|
| QAQQRDELADEIANSSGK                             | 2090.2             | 3            | 4.8188 | 0.3964 |
| QAQQRDELADEIANSSGKGALALEEK                     | 2902.1             | 3            | 6.2738 | 0.4174 |
| QAQQRDELADEIANSSGKGALALEEKR                    | 3058.3             | 3            | 6.2375 | 0.5103 |
| QAQVATGGGPGAPPGSQPDYSAAWAEYYR                  | 2954.1             | 3            | 4.2445 | 0.3021 |
| QAQVDLEREKKELEDSLER                            | 2316.5             | 3            | 3.2138 | 0.2983 |
| QARPTYATAMLQSLLK                               | 1793.1             | 2            | 3.1611 | 0.1717 |
| QASAIKKEELVAR                                  | 1443.7             | 2            | 2.8065 | 0.2411 |
| QASDTGSNDAHNNK                                 | 1473.5             | 2            | 2.6042 | 0.2528 |
| QASEGPLKGILGYTEHQVVSSDFNSDTHSSTFDAGAGIALNDHFVK | 4850.2             | 3            | 3.6292 | 0.275  |
| QASIQHIQNAIDTEK                                | 1696.8             | 2            | 3.5249 | 0.357  |
| QASIQHIQNAIDTEKSQQALVQK                        | 2579.9             | 3            | 3.9016 | 0.3254 |
| QASIQHIQNAIDTEKSQQALVQKR                       | 2736.0             | 3            | 3.9848 | 0.2688 |
| QASPNIVIALAGNK                                 | 1396.6             | 2            | 3.2359 | 0.3294 |
| QASPNIVIALSGNK                                 | 1412.6             | 2            | 2.9654 | 0.3844 |
| QASPSIVIALAGNK                                 | 1369.6             | 2            | 3.1797 | 0.146  |
| QASVADYEETVKK                                  | 1468.6             | 2            | 3.3867 | 0.292  |
| QATHDQAVQALKR                                  | 1466.6             | 2            | 2.6365 | 0.2614 |
| QATINIGTIGHVAHGK                               | 1617.8             | 2            | 3.47   | 0.2934 |
| QATKDAGQISGLNVLR                               | 1671.9             | 3            | 4.3688 | 0.2822 |
| QATKDAGTIAGLNVLR                               | 1628.9             | 3            | 3.9088 | 0.4179 |
| QATKDAGTIAGLNVMR                               | 1646.9             | 2            | 4.2008 | 0.5211 |
| QATKDAGTITGLNVLR                               | 1658.9             | 2            | 2.576  | 0.1323 |
| QATKDAGVIAGLNVLR                               | 1626.9             | 3            | 4.4061 | 0.3475 |
| QATSTASTFVKPIFSR                               | 1742.0             | 2            | 3.2844 | 0.2318 |
| QATTIADNIIIFLSDQTK                             | 1993.2             | 2            | 5.3756 | 0.5018 |
| QATTIADNIIIFLSDQTKKEKE                         | 2379.6             | 2            | 4.1844 | 0.4375 |
| QATVGDINTERPGMLDFTGK                           | 2151.4             | 2            | 3.3934 | 0.3606 |
| QATYGYLGNPAEFHDSSDHHTFK                        | 2786.9             | 3            | 3.6856 | 0.378  |
| QATYGYLGNPAEFHDSSDHHTFKK                       | 2915.1             | 3            | 3.5301 | 0.2189 |
| QAVDFLSNEGHIYSTVDDDFK                          | 2538.7             | 3            | 3.5554 | 0.292  |
| QAVDQIKSQEQLAAELAEYTAK                         | 2435.7             | 2            | 4.2805 | 0.3333 |
| QAVDQISSGFFSPK                                 | 1511.7             | 2            | 2.9964 | 0.3172 |
| QAVEMKNDKSEEEQSSSSVK                           | 2241.4             | 3            | 3.9328 | 0.3571 |
| QAVEMKNDKSEEEQSSSSVKKDETNVK                    | 3056.3             | 3            | 3.7666 | 0.1927 |
| QAVEQQIQSHR                                    | 1324.4             | 2            | 3.0112 | 0.1825 |
| QAVEQQIQSHRETHQK                               | 1948.1             | 2            | 2.9914 | 0.2697 |

| Peptide Sequence               | Peptide mass (m/z) | Charge State | Xcorr  | DelCn2 |
|--------------------------------|--------------------|--------------|--------|--------|
| QAVITKELIEIISGAAALD            | 1956.3             | 2            | 4.1376 | 0.2797 |
| QAVQILDELAEKLK                 | 1598.9             | 2            | 4.2865 | 0.2412 |
| QAVQILQQVTVR                   | 1383.6             | 2            | 3.1088 | 0.2543 |
| QAVSASGK                       | 747.8              | 1            | 1.9946 | 0.1368 |
| QAVSMFLGAVEEAKK                | 1608.9             | 2            | 3.3122 | 0.3582 |
| QAVSMFLGAVEEAKKEGGTVVYGGK      | 2556.9             | 3            | 4.7016 | 0.4322 |
| QAVTNPNTFYATK                  | 1569.7             | 2            | 4.0949 | 0.427  |
| QAVTNPNTFYATKR                 | 1725.9             | 2            | 3.7993 | 0.3954 |
| QAWFIENEEQEYVQTVK              | 2142.3             | 3            | 4.4849 | 0.2365 |
| QAYVDKLEELMK                   | 1467.7             | 2            | 3.8345 | 0.2762 |
| QDAFYKEQLAR                    | 1369.5             | 2            | 2.85   | 0.17   |
| QDAKDPTSLLGLQAEADSTSEGLEDAVHSR | 3241.4             | 3            | 4.3474 | 0.3204 |
| QDAQDLYEAGEK                   | 1367.4             | 2            | 4.2901 | 0.3676 |
| QDAQDLYEAGEKK                  | 1495.6             | 2            | 3.538  | 0.2982 |
| QDDGSSASPSVQGAPR               | 1646.7             | 2            | 4.7533 | 0.471  |
| QDEEKPLHALLHGR                 | 1643.8             | 3            | 4.3707 | 0.4406 |
| QDEHGYISR                      | 1105.1             | 1            | 1.7162 | 0.2389 |
| QDFVQHFSQIVR                   | 1504.7             | 2            | 3.2264 | 0.2092 |
| QDGDPAFLYLLSAPR                | 1663.9             | 2            | 3.0212 | 0.2567 |
| QDGPGQDK                       | 844.8              | 1            | 1.9787 | 0.1179 |
| QDGPMPKPHSVSLNDTETR            | 2110.3             | 3            | 3.6143 | 0.3969 |
| QDGPMPKPHSVSLNDTETRK           | 2238.5             | 3            | 3.4517 | 0.3946 |
| QDHAQQLATAAEER                 | 1568.6             | 2            | 3.7096 | 0.3769 |
| QDHPSSMGVYGQESGGFSGPGENR       | 2481.6             | 3            | 5.5325 | 0.3842 |
| QDIAFAYQR                      | 1112.2             | 2            | 3.183  | 0.3675 |
| QDILDDSGYVSAYK                 | 1574.7             | 2            | 3.6415 | 0.324  |
| QDKHYGYNYSVSNSEKDIMAEIYK       | 2971.2             | 3            | 4.8957 | 0.4347 |
| QDKIYFMAGSSR                   | 1403.6             | 2            | 2.4073 | 0.1027 |
| QDLDRGLELISK                   | 1387.6             | 2            | 3.361  | 0.1214 |
| QDLKGLEETVAKELQTLHNLR          | 2436.8             | 3            | 4.3026 | 0.4149 |
| QDLLAYLQR                      | 1120.3             | 2            | 3.0706 | 0.2379 |
| QDLLTAAPASEIAEGLNLHTIR         | 2334.6             | 3            | 3.2885 | 0.2094 |
| QDLPDAMKPHEIQEK                | 1780.0             | 2            | 3.2977 | 0.2971 |
| QDLPNAMNAAEITDK                | 1631.8             | 2            | 4.1371 | 0.4026 |
| QDLPNAMNAAEITDKLGLHSLR         | 2408.7             | 3            | 4.7285 | 0.417  |
| QDLTTLDVTK                     | 1134.3             | 2            | 2.5164 | 0.2263 |

| Peptide Sequence                    | Peptide mass (m/z) | Charge State | Xcorr  | DelCn2 |
|-------------------------------------|--------------------|--------------|--------|--------|
| QDLTTLDVTKLTPLSHEVISR               | 2367.7             | 3            | 4.8278 | 0.34   |
| QDMPNAMPVSELTDKLGLQHLR              | 2494.9             | 3            | 3.914  | 0.3029 |
| QDNKVVIGFVPLAEIMGYSTVLR             | 2551.0             | 3            | 4.2911 | 0.3231 |
| QDPLLSSETFNSFLR                     | 1812.0             | 2            | 3.9893 | 0.388  |
| QDRFAGLHFFNPVPMK                    | 2004.3             | 3            | 4.0803 | 0.4272 |
| QDRPFLLYYASHHHTYPQFSGQSFAER         | 3318.6             | 3            | 5.4098 | 0.3798 |
| QDVNASLAR                           | 1089.1             | 1            | 2.7764 | 0.2692 |
| QEAEAKEALLQASR                      | 1673.8             | 2            | 4.4625 | 0.364  |
| QEAFLLNEDLGDSLDSVEALLK              | 2420.7             | 2            | 5.4012 | 0.4183 |
| QEAGISEGQGTAGEEEEEKKK               | 2106.2             | 2            | 3.681  | 0.3314 |
| QEALKNDLVEALKR                      | 1627.9             | 2            | 3.7852 | 0.2759 |
| QEAISMIPLLLNVPRPHHK                 | 2180.6             | 3            | 3.6564 | 0.298  |
| QECDIARAVAR                         | 1232.4             | 2            | 3.2215 | 0.2449 |
| QEDVSVQLEALDIMADMLSR                | 2264.6             | 2            | 4.4354 | 0.4267 |
| QEEEQDLGEGKGPSSEGPEEEDGEGFSFK       | 3187.2             | 3            | 5.7397 | 0.3171 |
| QEESQIKTLNNKFASFDKVR                | 2625.9             | 3            | 4.3747 | 0.3222 |
| QEFQHANAFHQWIQETR                   | 2242.4             | 2            | 3.4957 | 0.3666 |
| QEFKQDELKR                          | 1450.6             | 2            | 2.7025 | 0.2344 |
| QEGLDGGLPEEVLFGNLDLLPPPGK           | 2605.9             | 2            | 4.0048 | 0.334  |
| QEGLTFFGTELAPVR                     | 1665.9             | 2            | 3.3967 | 0.253  |
| QEILENKDVVVQHVHFDGLGR               | 2433.7             | 3            | 4.8094 | 0.4215 |
| QEIQLFR                             | 1071.2             | 2            | 2.6265 | 0.2397 |
| QEIQLFREPEK                         | 1554.7             | 2            | 2.8699 | 0.1665 |
| QEIIVSLFNAFGR                       | 1381.6             | 2            | 3.4657 | 0.2318 |
| QEKPAEKPAETPVATSPTATDSTSGDSSR       | 2947.1             | 3            | 5.1094 | 0.4024 |
| QELILSNSDKSIR                       | 1632.8             | 2            | 4.172  | 0.3521 |
| QELNEPPKQSTSFLVLQEILESEEKGDPNKPSGFR | 3973.4             | 3            | 3.5239 | 0.2034 |
| QELQETQERLEAATQQNQQLR               | 2542.7             | 3            | 4.3744 | 0.2168 |
| QELVTKIDHILDAL                      | 1608.9             | 2            | 3.4236 | 0.2789 |
| QEMQEVQSSR                          | 1222.3             | 2            | 3.186  | 0.2659 |
| QEPERNECFLQHKDDNPNLPR               | 2580.8             | 3            | 4.5513 | 0.3598 |
| QEPQPQPPPAAGAVASYDYLVIGGGSGGLASAR   | 3240.5             | 3            | 5.3408 | 0.3827 |
| QEQVKIESLAK                         | 1273.5             | 2            | 2.4259 | 0.2378 |
| QETESLHGSSGK                        | 1260.3             | 2            | 2.4353 | 0.2612 |
| QETFDAGLQAFQQEGIANITALKDQLLAAK      | 3234.6             | 3            | 6.0288 | 0.4849 |
| QEYDEAGPSIVHRK                      | 1629.8             | 2            | 3.2358 | 0.3166 |

| Peptide Sequence                      | Peptide mass (m/z) | Charge State | Xcorr  | DelCn2 |
|---------------------------------------|--------------------|--------------|--------|--------|
| QEYDESGPSIVHR                         | 1517.6             | 2            | 3.0118 | 0.2396 |
| QEYDESGPSIVHRK                        | 1645.8             | 2            | 3.3141 | 0.2825 |
| QFAEENGLLFLEASAK                      | 1768.0             | 2            | 2.9604 | 0.2588 |
| QFAPEYEKIANILKDKDPPPIPAK              | 2726.2             | 3            | 3.888  | 0.3259 |
| QFAPIHAEAPEFMEMSVEQEILVTGIK           | 3046.5             | 3            | 3.7543 | 0.2736 |
| QFAPIHAEAPEFMEMSVEQEILVTGIKVVDLLAPYAK | 4116.8             | 3            | 4.4753 | 0.4053 |
| QFASQANVVGVPWIQTK                     | 1775.0             | 2            | 3.9874 | 0.4082 |
| QFAYQNSWGLTTR                         | 1572.7             | 2            | 3.5464 | 0.2833 |
| QFDHLNHLNPDKFESTDLDMLIK               | 2772.1             | 3            | 4.7945 | 0.3005 |
| QFDKILELIESGKK                        | 1648.9             | 2            | 2.8363 | 0.1777 |
| QFDSPMPSPFQGSFTLPLDVMK                | 2527.9             | 2            | 2.6255 | 0.1418 |
| QFDVNLQVPDR                           | 1331.5             | 2            | 2.5376 | 0.1142 |
| QFEAPTLAEGFSAILEIPFR                  | 2237.5             | 2            | 4.6154 | 0.3888 |
| QFEDEKANWEAQQR                        | 1779.8             | 2            | 3.5395 | 0.3171 |
| QFEGLADKLSFGLEDEPLETATK               | 2539.8             | 3            | 5.3577 | 0.2349 |
| QFEGLADKLSFGLEDEPLETATKEN             | 2783.0             | 3            | 5.3663 | 0.2778 |
| QFEHLDPQNHQHTFEAR                     | 1998.1             | 2            | 2.783  | 0.2434 |
| QFGAQANVIGPWIQTK                      | 1759.0             | 2            | 3.6923 | 0.2958 |
| QFGFIVLTTSAGIMDHEEAR                  | 2223.5             | 3            | 3.8982 | 0.3255 |
| QFHLTDDDLLR                           | 1373.5             | 2            | 2.7771 | 0.3938 |
| QFIAAQGSSR                            | 1065.2             | 2            | 2.5064 | 0.2852 |
| QFIDSNPNQPLVILEMESGASAK               | 2489.8             | 3            | 5.0521 | 0.3237 |
| QFILVMNALDNR                          | 1434.7             | 2            | 3.9431 | 0.3187 |
| QFLESSELPR                            | 1206.3             | 2            | 2.669  | 0.2045 |
| QFLDSGYFSDNILCHFCASMISGLVTTAASMPVDIAK | 4068.7             | 3            | 3.694  | 0.1413 |
| QFLPVAFPVGNAFSYYQSNR                  | 2306.6             | 3            | 4.239  | 0.35   |
| QFLQAAEAIDDIPFGITSNSDVFSK             | 2715.0             | 2            | 5.8151 | 0.5796 |
| QFLQAAEAIDDIPFGITSNSDVFSKYQLDKDGVVLFK | 4121.6             | 3            | 5.7127 | 0.3668 |
| QFLQAAEAIDDIPFGITSNSDVFSKYQLDKDGVVLFK | 4249.8             | 3            | 5.1219 | 0.3837 |
| QFLSETEKMSPEDR                        | 1697.8             | 2            | 3.9297 | 0.3414 |
| QFLSETEKMSPEDRAK                      | 1897.1             | 2            | 3.0522 | 0.1548 |
| QFNKLTEDKADVQSIIGLQR                  | 2304.6             | 3            | 4.4445 | 0.2256 |
| QFQDAGHFDAENIKK                       | 1748.9             | 2            | 3.448  | 0.2423 |
| QFSANDKVYTVEK                         | 1529.7             | 2            | 3.3578 | 0.2683 |
| QFSANDKVYTVEKADNFEYSDPVDGSISR         | 3283.5             | 3            | 4.3517 | 0.2976 |
| QFSSADEAALKEPIIKKFEEGNPYYSAR          | 3406.7             | 3            | 3.7189 | 0.148  |

| Peptide Sequence                           | Peptide mass (m/z) | Charge State | Xcorr  | DelCn2 |
|--------------------------------------------|--------------------|--------------|--------|--------|
| QFVNEWAAEIPGGPEAASAIAEELGYDLLGQIGSLENHYLFK | 4550.0             | 3            | 3.274  | 0.1727 |
| QFVPIKVEQIEAGTPGR                          | 1870.1             | 2            | 3.7563 | 0.3799 |
| QFVQSAKEVANSTANLVK                         | 1935.2             | 3            | 3.6817 | 0.2525 |
| QFVTPADVVSQNP                              | 1459.6             | 2            | 3.1822 | 0.2622 |
| QFYDQALQQAVVDDDANNAK                       | 2254.4             | 3            | 5.4786 | 0.3839 |
| QFYFTQGGNLMQAR                             | 1748.9             | 2            | 3.8902 | 0.3408 |
| QGAAIGIPYFTAYR                             | 1528.7             | 2            | 2.7339 | 0.1734 |
| QGAFLVNTAR                                 | 1077.2             | 2            | 2.8022 | 0.2405 |
| QGAIVAVTGDGVNDSPALK                        | 1813.0             | 2            | 6.1445 | 0.5459 |
| QGAIVAVTGDGVNDSPALKK                       | 1941.2             | 2            | 5.2031 | 0.4833 |
| QGAPGQGGGGGLSHEDTLALLEGLVSR                | 2577.8             | 3            | 4.1952 | 0.165  |
| QGAPGQGGGGGLSHEDTLALLEGLVSRR               | 2734.0             | 3            | 3.8201 | 0.4471 |
| QGAPPAAGQGGALVELTPTPGGLALVSPYHTR           | 3222.6             | 3            | 3.3099 | 0.2441 |
| QGDMVLEKPYSEATAR                           | 1796.0             | 2            | 3.2031 | 0.332  |
| QGDTGDWIGTFLGHK                            | 1632.8             | 3            | 3.2313 | 0.3881 |
| QGEDNSTAQDTEELEKEIREDLPVNTSK               | 3177.3             | 3            | 3.3271 | 0.1027 |
| QGEVSKAASADSTTEGTPADGFTVLSTK               | 2756.9             | 3            | 4.9281 | 0.3305 |
| QGFEPSPFVWFLGWDDDYWSVDPLDR                 | 3232.5             | 2            | 3.7701 | 0.36   |
| QGFGEELLQAVPLADSFR                         | 1849.1             | 2            | 4.5444 | 0.3941 |
| QGGAPDAGQE                                 | 929.9              | 2            | 2.4365 | 0.1627 |
| QGGGGGGGGSVPGIER                           | 1285.3             | 2            | 3.7405 | 0.4691 |
| QGGLGPIRIPLLSDLTHQISK                      | 2244.6             | 3            | 6.1944 | 0.4548 |
| QGGLGPIRIPLLSDLTHQISKDYGVYLEDGHTLR         | 3851.3             | 3            | 3.3197 | 0.2317 |
| QGGLGPMNIPLVSDPK                           | 1623.9             | 2            | 4.1104 | 0.3563 |
| QGGLGPMNIPLVSDPKR                          | 1780.1             | 2            | 3.5955 | 0.4165 |
| QGGPTYIIDTNALR                             | 1569.7             | 2            | 3.2008 | 0.3423 |
| QGHRPLSQSIVEAGSVGQTDLNKR                   | 2578.8             | 3            | 5.7461 | 0.3726 |
| QGIETPEDQNDR                               | 1515.6             | 2            | 2.9831 | 0.2618 |
| QGIETPEDQNDRK                              | 1643.7             | 2            | 2.9046 | 0.1538 |
| QGILGAQPQLIFQPHR                           | 1804.1             | 2            | 2.7479 | 0.1755 |
| QGIVPPGLTENELWR                            | 1709.9             | 2            | 3.4725 | 0.3686 |
| QGKLDEAEDDFKK                              | 1523.6             | 2            | 3.0605 | 0.2878 |
| QGKYQDAETLYKEILTR                          | 2057.3             | 3            | 3.329  | 0.1848 |
| QGLLPLTFADPADYNK                           | 1764.0             | 2            | 3.2976 | 0.3611 |
| QGLLPLTFADPADYNKIHPVDKLTIQGLKDFTPGKPLK     | 4191.9             | 3            | 3.5813 | 0.2646 |
| QGLLPSLEDLLFYTIAEGQEK                      | 2365.7             | 2            | 4.632  | 0.5089 |



| Peptide Sequence                     | Peptide mass (m/z) | Charge State | Xcorr  | DelCn2 |
|--------------------------------------|--------------------|--------------|--------|--------|
| QGLLPSLEDLLFYTIAEGQEKIPVHK           | 2940.4             | 3            | 3.962  | 0.4012 |
| QGLNGVPILSEEELSLLEDFYK               | 2494.8             | 2            | 4.082  | 0.4286 |
| QGLPATSDIKDVDSLNR                    | 1847.1             | 2            | 3.2136 | 0.3735 |
| QGLYDRLPPLPVTPGMEGAGVVIAGGEGVSDR     | 3251.7             | 3            | 6.4916 | 0.5408 |
| QGLYDRLPPLPVTPGMEGAGVVIAGGEGVSDRK    | 3379.9             | 3            | 5.4003 | 0.4382 |
| QGLYELSASNFEHVAQGDHFIK               | 2604.9             | 3            | 4.3325 | 0.4046 |
| QGNAVTLGDYYQGR                       | 1542.6             | 2            | 2.5239 | 0.1987 |
| QGNMTAALQAALK                        | 1317.5             | 2            | 3.1328 | 0.3321 |
| QGPGEPPRPDLPELYLSVHDPAGALQAAFR       | 3412.8             | 3            | 4.24   | 0.2221 |
| QGPISDNYLFTPGK                       | 1537.7             | 2            | 3.1992 | 0.3327 |
| QGPPHINHDDPSLVPNPYFDLPAGLMAPLVK      | 3451.0             | 3            | 3.46   | 0.154  |
| QGQDAIPPPDPGEQIFNLPK                 | 2162.4             | 2            | 2.8063 | 0.1409 |
| QGQDNLSSVKETQK                       | 1562.7             | 2            | 2.5014 | 0.1362 |
| QGQDVAPPPNPGDQIFNK                   | 1923.1             | 2            | 3.9631 | 0.2773 |
| QGQDVAPPPNPVPQR                      | 1600.8             | 2            | 2.9813 | 0.2288 |
| QGQETAVAPSLVAPALNKPK                 | 2020.3             | 2            | 4.4547 | 0.3833 |
| QGQNVIGLQMGSNK                       | 1474.7             | 2            | 4.0882 | 0.362  |
| QGQPVLVSGVHKK                        | 1377.6             | 2            | 2.7653 | 0.1187 |
| QGQQQAGGDGKTEQK                      | 1560.6             | 2            | 3.3899 | 0.1887 |
| QGQYSPMAIEEQVAVIYAGVR                | 2310.6             | 2            | 5.2745 | 0.4567 |
| QGRPVICDKEDTETIKNTK                  | 2275.6             | 3            | 3.4474 | 0.139  |
| QGRQEALWLR                           | 1499.7             | 2            | 3.5319 | 0.248  |
| QGRTLYGFGG                           | 1056.2             | 1            | 2.2334 | 0.2943 |
| QGSQSSQPMQEVQEGYGFSGDDPYSSAEPHVSGVKR | 3715.9             | 3            | 5.3787 | 0.5044 |
| QGSLYHEMAIEPLDDIAAVTDILTQR           | 2901.2             | 3            | 3.5597 | 0.3004 |
| QGSPDQVSPVSEMTSTSLYQDKQEGK           | 2828.0             | 3            | 3.3594 | 0.2976 |
| QGSSAEQPLGGR                         | 1187.2             | 2            | 2.6605 | 0.3101 |
| QGTFFHSQQALEYGTK                     | 1695.8             | 2            | 2.8006 | 0.2737 |
| QGVDDAFYTLVR                         | 1384.5             | 2            | 3.3966 | 0.3565 |
| QGVEDAFYTLVR                         | 1398.5             | 2            | 3.3937 | 0.3364 |
| QGVNNAEKFDYVMQFLNK                   | 2146.4             | 3            | 4.2578 | 0.3403 |
| QGVSHIIVDEVHER                       | 1618.8             | 2            | 4.8382 | 0.1755 |
| QHAFSSHSSGSQSQK                      | 1603.6             | 2            | 3.1357 | 0.3284 |
| QHAQPPKPSDSSGGR                      | 1636.7             | 2            | 2.8163 | 0.182  |
| QHDQLEAQKLEYHQVIQQMEQK               | 2753.0             | 3            | 3.9881 | 0.3025 |
| QHEADADLINAGK                        | 1382.5             | 2            | 3.1132 | 0.2636 |

| Peptide Sequence                  | Peptide mass (m/z) | Charge State | Xcorr  | DelCn2 |
|-----------------------------------|--------------------|--------------|--------|--------|
| QHFISFDTR                         | 1266.3             | 2            | 2.4573 | 0.1498 |
| QHFISFDTRSGTVDPQELQK              | 2449.6             | 2            | 2.9854 | 0.1664 |
| QHFPATPLLDYALEVEK                 | 1972.2             | 3            | 4.9893 | 0.3377 |
| QHFPATPLLDYALEVEKITTSK            | 2502.8             | 2            | 2.8964 | 0.2554 |
| QHIVNDMNPGNLHLFINAYNSR            | 2568.9             | 3            | 4.9835 | 0.3713 |
| QHIYKEIVNFSPIAR                   | 1816.1             | 2            | 2.6803 | 0.2383 |
| QHLLTNLVEVDGR                     | 1494.7             | 2            | 2.6311 | 0.1719 |
| QHLNLNNAEQLCR                     | 1553.7             | 2            | 2.8615 | 0.1588 |
| QHLSPAEVEAILQVIQR                 | 1932.2             | 3            | 3.3729 | 0.156  |
| QHLVEVR                           | 881.0              | 1            | 1.8611 | 0.1651 |
| QHLYVDKNTK                        | 1246.4             | 2            | 2.4282 | 0.1363 |
| QHMDITGEENPLNK                    | 1626.8             | 2            | 3.555  | 0.3255 |
| QHNSGPNSKPVVSVFIAGLTAPPGR         | 2432.7             | 2            | 2.9281 | 0.3836 |
| QHPDWEDEELFQHAR                   | 1938.0             | 2            | 3.0141 | 0.3008 |
| QHPQPYIFPDSPPGGTSYER              | 2177.3             | 3            | 4.1274 | 0.31   |
| QHPVPPPAQNQNQVR                   | 1710.9             | 3            | 4.2755 | 0.3097 |
| QHQLYVGVLGSK                      | 1329.5             | 3            | 4.5133 | 0.4031 |
| QHQS DVEALKR                      | 1311.4             | 2            | 2.691  | 0.2853 |
| QHQTRLDIISEDISELQK                | 2154.4             | 2            | 2.7165 | 0.1628 |
| QHSNSNMVIMLIGNK                   | 1687.0             | 2            | 3.439  | 0.3279 |
| QHSSQDVHVVLK                      | 1377.5             | 2            | 2.6315 | 0.2041 |
| QHVIDGEKTIQNPTDQQKK               | 2321.6             | 3            | 3.4338 | 0.2094 |
| QHYIDLKDRPFFPGLVK                 | 2074.4             | 2            | 2.8145 | 0.235  |
| QHYVLAGASGSPGEEVAIRPSTAPR         | 2551.8             | 3            | 3.8175 | 0.3987 |
| QIAASSQDSVGR                      | 1219.3             | 2            | 2.5749 | 0.2076 |
| QIAEGTISEMWQNDLQPLLIER            | 2673.0             | 3            | 4.524  | 0.3333 |
| QIAEGTISEMWQNDLQPLLIERYPGSPGSYAAR | 3780.2             | 3            | 4.5194 | 0.3565 |
| QIANSQDGYVWQVTDMMNR               | 2126.3             | 2            | 5.561  | 0.4821 |
| QIAQLQDFVR                        | 1218.4             | 2            | 2.6231 | 0.2747 |
| QIASLTGLVQSALFK                   | 1576.9             | 2            | 3.7082 | 0.3462 |
| QIATLHAQVADMK                     | 1426.7             | 2            | 3.5464 | 0.4486 |
| QIATLHAQVADMKK                    | 1554.8             | 2            | 3.4512 | 0.3283 |
| QIDNPDYK                          | 993.1              | 1            | 2.2442 | 0.1663 |
| QIEELKGQEVSPK                     | 1485.7             | 2            | 4.0454 | 0.2265 |
| QIEETLAHFHLTK                     | 1567.8             | 2            | 2.6856 | 0.166  |
| QIEIQFAQGDR                       | 1305.4             | 2            | 3.4949 | 0.1802 |

| Peptide Sequence                | Peptide mass (m/z) | Charge State | Xcorr  | DelCn2 |
|---------------------------------|--------------------|--------------|--------|--------|
| QIEKDLLEQSR                     | 1375.5             | 2            | 2.8152 | 0.2348 |
| QIEQEKLASMK                     | 1305.5             | 2            | 2.8208 | 0.1681 |
| QIFHPEQLITGK                    | 1411.6             | 2            | 2.6187 | 0.3286 |
| QIFLGGVDKHTQFWR                 | 1833.1             | 2            | 2.9266 | 0.1564 |
| QIFLGGVDKR                      | 1133.3             | 2            | 2.956  | 0.2297 |
| QIGAFSEGNNLTHMLKEDDMFKDFAAR     | 3200.6             | 3            | 4.258  | 0.3332 |
| QIGENLIVPGGVK                   | 1324.6             | 2            | 2.7925 | 0.2672 |
| QIGLDQIWDDLRAIQQVYTRQSMK        | 3035.4             | 3            | 3.7997 | 0.1789 |
| QIGNVAALPGIVHR                  | 1445.7             | 2            | 3.5434 | 0.3515 |
| QIGRETGENVLHVR                  | 1608.8             | 2            | 3.047  | 0.2822 |
| QIGSVIRNPEILAIAPVLLDALTDPSR     | 2873.3             | 3            | 5.5758 | 0.3933 |
| QIGSVIRNPEILAIAPVLLDALTDPSRK    | 3001.5             | 3            | 4.2917 | 0.2263 |
| QIGVEHVVVVYVVK                  | 1484.7             | 2            | 3.4702 | 0.2468 |
| QIHHEALSKFQK                    | 1458.6             | 2            | 2.9309 | 0.1448 |
| QIIEQDKHALLDVTPK                | 1849.1             | 2            | 3.4327 | 0.2893 |
| QIILEKEETEELKR                  | 1759.0             | 2            | 4.2196 | 0.326  |
| QIIQANPLLEAFGNAK                | 1728.0             | 3            | 5.1348 | 0.3329 |
| QIIQQNPSLLPALLQQIGR             | 2131.5             | 3            | 4.4216 | 0.4088 |
| QIITDKDDLK                      | 1288.5             | 2            | 3.1804 | 0.1152 |
| QIIVDPLSFSEER                   | 1533.7             | 2            | 2.5271 | 0.2206 |
| QIIVVSSPTFLQKSQCR               | 1935.3             | 2            | 2.6515 | 0.2003 |
| QIKPYTLMSMVANLLYEKR             | 2299.8             | 3            | 3.4946 | 0.2306 |
| QIKQVEDDIQQLLK                  | 1698.9             | 2            | 3.6163 | 0.2644 |
| QIKQVEDDIQQLLKK                 | 1827.1             | 2            | 4.0336 | 0.3079 |
| QILAPVVKEIMDDKSLNIKTPVDIYK      | 3087.6             | 3            | 3.4006 | 0.2522 |
| QILLGPNTGLSGGMPGALPSLPGKI       | 2389.8             | 2            | 4.9903 | 0.376  |
| QILNFFHHR                       | 1212.4             | 2            | 2.848  | 0.1539 |
| QILVGDIGDTVEDPYTSFVK            | 2197.4             | 2            | 4.4141 | 0.37   |
| QINDYVEKGTQGK                   | 1480.6             | 2            | 3.4724 | 0.3353 |
| QINQEYLISQVEGHQVSLK             | 2214.5             | 3            | 3.4566 | 0.2721 |
| QINVGNALEYVSR                   | 1463.6             | 2            | 3.3714 | 0.3923 |
| QINWTVLYR                       | 1193.4             | 2            | 2.7493 | 0.2365 |
| QIPLQSLDLEFGSGFQPR              | 2033.3             | 2            | 4.7447 | 0.4028 |
| QIPVLQTNNGPSLTGLTTIAAHLVK       | 2588.0             | 2            | 3.9493 | 0.458  |
| QIPVVGSVLNVFSPVQALQK            | 2211.6             | 2            | 4.3317 | 0.2856 |
| QIQAAYSILSEVQQAQVSGSSDSQILDLSNR | 3337.6             | 3            | 5.68   | 0.4207 |

| Peptide Sequence                        | Peptide mass (m/z) | Charge State | Xcorr  | DelCn2 |
|-----------------------------------------|--------------------|--------------|--------|--------|
| QIQDMLGLTKPAMPMQQAR                     | 2158.6             | 3            | 3.3042 | 0.1227 |
| QIQELVEAIVLPMNHK                        | 1863.2             | 2            | 3.3177 | 0.1641 |
| QIQFADDMQEFTKFPTK                       | 2075.3             | 2            | 2.4289 | 0.1562 |
| QIRVDHAGK                               | 1024.2             | 2            | 2.4244 | 0.1091 |
| QISDVERDVQNFPAAATDEKDKFVEK              | 2910.1             | 3            | 3.6932 | 0.1588 |
| QISRDYGVLLLEGSGLALR                     | 1948.2             | 3            | 5.4342 | 0.3421 |
| QISRPSAAGINLMIGSTR                      | 1873.2             | 3            | 4.2255 | 0.4081 |
| QISSLRDEVEAK                            | 1375.5             | 2            | 3.4957 | 0.1904 |
| QITITGTPANISLAQYLINAR                   | 2259.6             | 2            | 3.1902 | 0.2297 |
| QITLNDLPVGR                             | 1226.4             | 2            | 2.789  | 0.1518 |
| QITQSALLAEAR                            | 1301.5             | 2            | 3.3117 | 0.2766 |
| QITVNDLPVGR                             | 1212.4             | 2            | 3.413  | 0.3575 |
| QIVSGSR                                 | 746.8              | 1            | 1.7515 | 0.2769 |
| QIVWNGPVGVFEWEAFAR                      | 2106.4             | 3            | 5.4955 | 0.5395 |
| QIYLSNPEETAAR                           | 1621.7             | 2            | 3.9662 | 0.2857 |
| QIYLTDNPEAVAIAIKLNQTALQAVTPITSFGK       | 3346.8             | 3            | 4.6488 | 0.3608 |
| QIYPPINVLPSLSR                          | 1597.9             | 2            | 3.2611 | 0.3012 |
| QKAEADKNDKAVKDLVLLFETALLSSGFSLEDPQTHSNR | 4416.9             | 3            | 4.3211 | 0.2985 |
| QKAEADKNDKSVK                           | 1461.6             | 2            | 2.4085 | 0.2006 |
| QKAQVEQELTTLR                           | 1544.7             | 2            | 3.2378 | 0.3934 |
| QKASIHEAWTDGK                           | 1471.6             | 2            | 2.6463 | 0.1858 |
| QKDFLDGVYAFEYYPSTPGR                    | 2354.6             | 2            | 4.8174 | 0.4947 |
| QKDIFAMDDKSENEPIEENAAKYDLK              | 3043.3             | 3            | 4.0535 | 0.2818 |
| QKDYETATLSEIK                           | 1526.7             | 2            | 3.743  | 0.2981 |
| QKEFDPTITDASLSLPSR                      | 2006.2             | 2            | 4.2583 | 0.362  |
| QKEGESEDLASR                            | 1349.4             | 2            | 2.5691 | 0.2317 |
| QKEVNENFAIDLIAEQPVSEVETR                | 2760.0             | 3            | 4.9956 | 0.3468 |
| QKEVQMNFLNQLTSVFNPR                     | 2294.6             | 3            | 3.6449 | 0.1346 |
| QKGADFLVTEVENGGSLGSK                    | 2037.2             | 3            | 4.4861 | 0.3843 |
| QKGADFLVTEVENGGSLGSKK                   | 2165.4             | 2            | 4.0582 | 0.3835 |
| QKGYEEEEIIHFKK                          | 1649.9             | 2            | 2.8826 | 0.1419 |
| QKHDGTVGLLTYPVLQAADILLYK                | 2658.1             | 3            | 5.0181 | 0.4084 |
| QKHEIESLYTK                             | 1376.5             | 2            | 2.4249 | 0.1933 |
| QKHGVPPLKLCKNLNR                        | 1846.2             | 3            | 3.7763 | 0.1087 |
| QKHDPDKDLEQLVGIANYALLHQQK               | 2951.3             | 3            | 3.5926 | 0.3144 |
| QKHSQAVEELAEQLEQTK                      | 2097.3             | 2            | 4.1179 | 0.339  |

| Peptide Sequence              | Peptide mass (m/z) | Charge State | Xcorr  | DelCn2 |
|-------------------------------|--------------------|--------------|--------|--------|
| QKHSQAVEELAEQLEQTKR           | 2253.5             | 2            | 4.6439 | 0.3353 |
| QKIFQVAQELSGEDMHQFHR          | 2429.7             | 3            | 3.4674 | 0.2048 |
| QKILDQSEAEK                   | 1289.4             | 2            | 2.6804 | 0.1577 |
| QKISFLENNLEQLTK               | 1806.1             | 2            | 3.4513 | 0.3964 |
| QKIVELAHSGAR                  | 1309.5             | 2            | 2.831  | 0.2978 |
| QKIVQAEGEAEAAK                | 1472.6             | 2            | 3.6342 | 0.37   |
| QKIVQAEGEAEAAKMLGEALSKNPGYIK  | 2975.4             | 3            | 4.5918 | 0.3852 |
| QKKESEAVEWQQK                 | 1618.8             | 2            | 2.9619 | 0.1365 |
| QKKKPKMTDEEIMEKLRITVIGDPKKK   | 3301.0             | 3            | 3.2485 | 0.1202 |
| QKKQEYLEVQR                   | 1449.6             | 2            | 2.7134 | 0.1452 |
| QKLEAQLTENNIVKEELALLDGSNVVFK  | 3144.6             | 3            | 4.8566 | 0.3565 |
| QKLEAQQGLR                    | 1171.3             | 2            | 2.6808 | 0.1132 |
| QKLEEDAEMK                    | 1221.4             | 2            | 2.6043 | 0.3328 |
| QKLFQEDDEIPLYLK               | 1880.1             | 3            | 4.1186 | 0.2836 |
| QKLFQEDDEIPLYLKGGVADALLYR     | 2896.3             | 3            | 4.601  | 0.3439 |
| QKLFQFLQAEPHNSLGK             | 1986.3             | 3            | 3.3551 | 0.1623 |
| QKLPDGSEIPLPILLGR             | 1944.3             | 3            | 4.3067 | 0.3021 |
| QKLQLEKVTTEAK                 | 1516.8             | 2            | 3.2644 | 0.2564 |
| QKLSPDAVAQLAFQMAFLR           | 2135.5             | 3            | 4.0074 | 0.2984 |
| QKLTAQVEELSK                  | 1374.6             | 2            | 2.827  | 0.2325 |
| QKLTETELKFELLEKDPYALDVPNTAFGR | 3367.8             | 3            | 4.0324 | 0.2563 |
| QKNGSSAKPSCPYPCCAVGSK         | 2119.5             | 2            | 2.7426 | 0.2104 |
| QKPITPETAEKLR                 | 1582.8             | 2            | 2.4722 | 0.1854 |
| QKPNLGKYDDPPDWQEILTYFR        | 2725.0             | 3            | 3.3732 | 0.1201 |
| QKPQEVQENGEMEDPSISFSKPK       | 2601.9             | 3            | 3.8031 | 0.2184 |
| QKQAADAEMEK                   | 1249.4             | 2            | 2.4659 | 0.1518 |
| QKQLEDILVLAK                  | 1398.7             | 2            | 2.4827 | 0.1788 |
| QKQQEAALELEELKK               | 1786.0             | 2            | 3.9253 | 0.2807 |
| QKSDAEEDGGTVSQEEEDRKP         | 2463.5             | 3            | 3.4047 | 0.1747 |
| QKSQQTISQLHSTVHLIEFAR         | 2452.8             | 3            | 3.6983 | 0.3436 |
| QKTEEELETTLK                  | 1562.7             | 2            | 3.6407 | 0.376  |
| QKTESTLNALLQR                 | 1502.7             | 2            | 3.6448 | 0.2625 |
| QKTHVHIGEGPSTISNSTIPENATSSGR  | 2907.1             | 3            | 3.9372 | 0.1788 |
| QKVDDDRKHEIEAAIVR             | 2023.2             | 3            | 3.5438 | 0.2315 |
| QKVDSLLENLEK                  | 1416.6             | 2            | 3.2781 | 0.2596 |
| QKVDSLLENLEKIEK               | 1787.0             | 3            | 3.4375 | 0.1673 |

| Peptide Sequence                    | Peptide mass (m/z) | Charge State | Xcorr  | DelCn2 |
|-------------------------------------|--------------------|--------------|--------|--------|
| QKVDSLLENLEKIEKEQSK                 | 2259.5             | 2            | 3.7093 | 0.343  |
| QKVEGTEPTTAFNLFVGNLNFNK             | 2569.9             | 3            | 5.2808 | 0.4611 |
| QKVEILNELYQQK                       | 1633.9             | 2            | 3.2446 | 0.153  |
| QKVENLLLEAEKR                       | 1570.8             | 2            | 3.2205 | 0.2128 |
| QKVEQNAAPSHTK                       | 1438.6             | 2            | 3.7449 | 0.3365 |
| QKYTLPLYHAMMGGSEVAQTLAK             | 2539.0             | 3            | 3.8598 | 0.2166 |
| QLAAENRLTEMETLQSQLMAEK              | 2535.9             | 3            | 4.6045 | 0.3024 |
| QLAALKQQLVASHLEK                    | 1778.1             | 2            | 4.2549 | 0.4305 |
| QLAALKQQLVASHLEKLLGPDAAINLTDPDGALAK | 3625.2             | 3            | 3.3422 | 0.2085 |
| QLADETLLKVDLENR                     | 1758.0             | 2            | 3.1485 | 0.3679 |
| QLADHLGFEFFFEASAK                   | 1811.0             | 2            | 2.8342 | 0.3104 |
| QLAEEDLAQQR                         | 1301.4             | 2            | 2.8639 | 0.1115 |
| QLAEFVPLDYSVPIEPTIK                 | 2273.7             | 2            | 4.2347 | 0.2536 |
| QLAEGTAQQR                          | 1102.2             | 2            | 2.6099 | 0.1999 |
| QLAGEDMEISVK                        | 1320.5             | 2            | 2.5785 | 0.255  |
| QLAGILQVPLEER                       | 1466.7             | 2            | 2.7873 | 0.1934 |
| QLAPIWDKLGETYKDHENIVIAK             | 2683.1             | 3            | 4.7028 | 0.4311 |
| QLAPLLPSLAPSSAR                     | 1521.8             | 2            | 3.1404 | 0.1876 |
| QLAQIDGTLSTIEFQR                    | 1821.0             | 3            | 5.004  | 0.4    |
| QLAQIDGTLSTIEFQREALENANTNTEVLK      | 3348.7             | 3            | 4.2919 | 0.468  |
| QLASEDISHITPTQGFIK                  | 2100.3             | 2            | 4.4042 | 0.438  |
| QLAVYEEFAR                          | 1226.4             | 2            | 2.7474 | 0.1577 |
| QLDDEEVSEFALDGLKQVMAIK              | 2479.8             | 3            | 3.4914 | 0.1851 |
| QLDDKDEEINQQSQLVEK                  | 2160.3             | 3            | 4.1033 | 0.2018 |
| QLDDLKVELSQLR                       | 1557.8             | 2            | 3.4445 | 0.3884 |
| QLDFNSSKDVAVMQLR                    | 1852.1             | 2            | 3.5393 | 0.3165 |
| QLDMFKTNLEEFASK                     | 1802.0             | 2            | 3.4121 | 0.273  |
| QLDSYKNGFLNLALPFFGFSEPLAAPR         | 3014.4             | 3            | 5.5007 | 0.4674 |
| QLEAIDQLHLEYAK                      | 1671.9             | 2            | 4.1469 | 0.4189 |
| QLEDGDQPESK                         | 1246.3             | 2            | 2.7157 | 0.1512 |
| QLEDGRTLSDYNIQKESTLHLVLR            | 2830.1             | 3            | 4.6765 | 0.2544 |
| QLEDLVEELSFSR                       | 1565.7             | 2            | 3.7967 | 0.21   |
| QLEEAEEEEAQR                        | 1332.4             | 2            | 3.798  | 0.3252 |
| QLEEAEEEEASR                        | 1291.3             | 2            | 3.0975 | 0.2631 |
| QLEEAEEEEATR                        | 1305.3             | 2            | 3.3176 | 0.2144 |
| QLEEAEEEEATRANASR                   | 1804.9             | 3            | 3.2482 | 0.3232 |

| Peptide Sequence                    | Peptide mass (m/z) | Charge State | Xcorr  | DelCn2 |
|-------------------------------------|--------------------|--------------|--------|--------|
| QLEEEKNSLQEQEEEEEEARK               | 2604.7             | 3            | 5.0242 | 0.2095 |
| QLEEEKNSLQEQEEEEEEARKNLEK           | 3089.2             | 3            | 4.6481 | 0.181  |
| QLEEKEKLLATEQEDAATAVAK              | 2244.5             | 3            | 4.8825 | 0.3759 |
| QLEESVDALSEELVQLR                   | 1959.1             | 3            | 4.1071 | 0.3307 |
| QLEETKALQGQISSQQVAVEK               | 2315.6             | 3            | 3.3029 | 0.2231 |
| QLEIAHEKLR                          | 1237.4             | 2            | 2.674  | 0.1305 |
| QLEKDFSSMK                          | 1213.4             | 2            | 2.6275 | 0.1176 |
| QLEMILNKPGLK                        | 1384.7             | 2            | 3.4209 | 0.3018 |
| QLEPVYNSLAK                         | 1262.4             | 2            | 2.4321 | 0.1022 |
| QLEQSEKDLVK                         | 1317.5             | 2            | 3.2854 | 0.2232 |
| QLEQTLKQFHIK                        | 1513.8             | 2            | 3.3789 | 0.2487 |
| QLESPLATHIR                         | 1265.4             | 2            | 2.7581 | 0.1263 |
| QLESNKIPELDMTEVVAPFMANIPLLLYPQDGPR  | 3841.4             | 3            | 4.6317 | 0.2755 |
| QLESTQTESNKK                        | 1393.5             | 2            | 3.5191 | 0.3382 |
| QLETLGQEK                           | 1046.2             | 1            | 1.8862 | 0.1234 |
| QLETLGQEKLEAELGNMQGLVEDFK           | 3062.5             | 3            | 3.7829 | 0.188  |
| QLETLGQEKLEAELGNMQGLVEDFKNKYEDEINKR | 4352.9             | 3            | 3.6226 | 0.2485 |
| QLETVLDDLDPENALLPAGFR               | 2327.6             | 2            | 2.5913 | 0.1801 |
| QLEVEPEEPEAENKHKPR                  | 2160.3             | 2            | 2.7231 | 0.3263 |
| QLEVVHTLDGKEYITPAQISK               | 2370.7             | 3            | 4.9054 | 0.4396 |
| QLFHPEQLITGK                        | 1411.6             | 2            | 2.7604 | 0.2985 |
| QLFHPEQLITGKEDAANNYAR               | 2416.6             | 3            | 4.4084 | 0.4483 |
| QLFLQTYAR                           | 1140.3             | 2            | 2.5813 | 0.3461 |
| QLFVLAGSAEEGVMTPELAGVIKR            | 2516.9             | 3            | 4.3439 | 0.3541 |
| QLGAAERDFIHTASISFLTPLR              | 2444.8             | 3            | 4.3011 | 0.371  |
| QLGDAFADLSLK                        | 1278.4             | 2            | 2.8097 | 0.1921 |
| QLGGSVELVDIGK                       | 1315.5             | 2            | 3.2979 | 0.3943 |
| QLGGSVELVDIGKQKLPDGSEIPLPPILLGR     | 3240.8             | 3            | 4.6952 | 0.3674 |
| QLGNLGVLGITAPVQYGGSGLYLEHVLVMEEISR  | 3672.2             | 3            | 3.5904 | 0.2235 |
| QLGQDLLNSYIENEGK                    | 1822.0             | 2            | 3.4659 | 0.4686 |
| QLGTAYVSATTGAVATALGLK               | 1994.3             | 2            | 4.7764 | 0.5366 |
| QLGTVQQVISER                        | 1358.5             | 2            | 3.0432 | 0.3598 |
| QLHDDYFYHDEL                        | 1595.6             | 2            | 3.2616 | 0.3686 |
| QLHELAPSIFFYLVDAEQGR                | 2334.6             | 2            | 2.4258 | 0.1995 |
| QLHEQAMQFGQLLTHLDTTQQMIANSLK        | 3226.7             | 3            | 4.2132 | 0.2828 |
| QLHQLLPNHVLQK                       | 1568.8             | 2            | 3.7019 | 0.2062 |

| Peptide Sequence               | Peptide mass (m/z) | Charge State | Xcorr  | DelCn2 |
|--------------------------------|--------------------|--------------|--------|--------|
| QLIAELENKNREILQEIQR            | 2338.6             | 3            | 3.3991 | 0.2526 |
| QLIMANPQMQLIQR                 | 1813.2             | 2            | 3.6188 | 0.4174 |
| QLIVGVNK                       | 871.1              | 1            | 2.545  | 0.1387 |
| QLIVKEYQAAYGK                  | 1511.7             | 2            | 3.6234 | 0.2804 |
| QLIVPPHLAHGESGAR               | 1682.9             | 2            | 2.9417 | 0.2388 |
| QLIYNYPEQLFGAAGVMAIEHADDFAGVER | 3211.6             | 3            | 4.9386 | 0.4322 |
| QLKTAEDYQALNKDIEAQLQHAGLR      | 2855.2             | 3            | 3.5669 | 0.2776 |
| QLLAESLPTTPFYFILGK             | 2168.5             | 2            | 4.286  | 0.1945 |
| QLLAGGIAGAVSR                  | 1213.4             | 2            | 4.3163 | 0.3501 |
| QLLAGLDKVASDLDRQEK             | 2000.2             | 3            | 3.5205 | 0.3778 |
| QLLDDEEQLTAK                   | 1403.5             | 2            | 3.3398 | 0.2562 |
| QLLDEVEVATEPAGSR               | 1714.9             | 2            | 3.3194 | 0.173  |
| QLLDLDPEVECLK                  | 1515.8             | 2            | 2.7463 | 0.1048 |
| QLLDQVEQIQK                    | 1342.5             | 2            | 3.5478 | 0.1324 |
| QLLDQVEQIQKEQDYQR              | 2162.3             | 2            | 3.7551 | 0.2587 |
| QLLGEHLTAILQK                  | 1464.7             | 2            | 3.5529 | 0.2961 |
| QLLGHMEDLEGDAQSVLDAR           | 2198.4             | 3            | 3.7679 | 0.1207 |
| QLLHLAEEKQTK                   | 1438.7             | 2            | 2.7523 | 0.229  |
| QLLHNFPDQLTSSGAPFWSGPKR        | 2682.0             | 3            | 3.536  | 0.3102 |
| QLLLESQSQLDAAK                 | 1544.7             | 2            | 4.2575 | 0.2959 |
| QLLLESQSQLDAAKSEAQKQSDELALVR   | 3100.4             | 3            | 5.3292 | 0.4626 |
| QLLLQEVENHKK                   | 1479.7             | 2            | 2.8911 | 0.1518 |
| QLLLTADDR                      | 1045.2             | 2            | 2.6035 | 0.1653 |
| QLLLTADDRVNPCIGGVILFHETLYQK    | 3058.5             | 3            | 7.2299 | 0.4522 |
| QLLQANPILEAFGNAK               | 1728.0             | 2            | 4.9632 | 0.2974 |
| QLLQANPILESFGNAK               | 1744.0             | 3            | 4.5786 | 0.3814 |
| QLLQEQESVKQAHLR                | 1808.0             | 2            | 4.0212 | 0.3502 |
| QLLSDYGPPSLGYTQGTGNSQVPQSK     | 2723.9             | 3            | 4.0161 | 0.2531 |
| QLLSNPEMMVQIMENPFVQSMLSNPDLMR  | 3395.0             | 3            | 4.0658 | 0.3253 |
| QLLSPGTALILLEAQAASGFLLDPVR     | 2695.2             | 2            | 4.8524 | 0.4452 |
| QLLTLSSSELSQAR                 | 1446.6             | 2            | 4.3164 | 0.3434 |
| QLLTLSSSELSQARDENKR            | 2089.3             | 2            | 3.2908 | 0.1943 |
| QLMETPANEMTPTR                 | 1619.8             | 2            | 3.1281 | 0.2337 |
| QLNDLWDQIEQAHLRLR              | 2122.3             | 3            | 4.1443 | 0.2816 |
| QLNDVKTTVVYPATEK               | 1807.0             | 2            | 3.2343 | 0.2896 |
| QLNEINYEDHKLK                  | 1644.8             | 2            | 3.4353 | 0.241  |



| Peptide Sequence                           | Peptide mass (m/z) | Charge State | Xcorr  | DelCn2 |
|--------------------------------------------|--------------------|--------------|--------|--------|
| QLNQFPDFNNYLIFVLTR                         | 2243.5             | 2            | 2.7825 | 0.2458 |
| QLNSTVSSLHSR                               | 1329.4             | 2            | 3.4601 | 0.326  |
| QLNTALPQEFAALTK                            | 1645.9             | 2            | 3.1732 | 0.1787 |
| QLPAMTALQTLHLR                             | 1593.9             | 2            | 3.485  | 0.2464 |
| QLPDKWQHDLFDSGFGGGAGVETGGK                 | 2704.9             | 3            | 4.1774 | 0.3237 |
| QLPFRGDDGIFDDNFIEER                        | 2284.4             | 3            | 3.6491 | 0.2849 |
| QLPFRGDEGIFEESFIEER                        | 2299.5             | 3            | 3.6774 | 0.3056 |
| QLPPTGTPTSCLFIIR                           | 1770.1             | 2            | 2.9059 | 0.1552 |
| QLPQDLGTAYYLTSQAMVDNLALR                   | 2683.0             | 2            | 3.5818 | 0.3905 |
| QLPQDLGTAYYLTSQAMVDNLALRDGQEGITAFLLQK      | 3971.4             | 3            | 4.5098 | 0.3668 |
| QLPTLILFQGGK                               | 1315.6             | 2            | 3.0969 | 0.1562 |
| QLPTSEAVVSAVSEAGASGITEAQAR                 | 2530.7             | 3            | 3.8544 | 0.1906 |
| QLPYYYLSPDRIPNSVAI                         | 2110.4             | 2            | 2.7312 | 0.2172 |
| QLQAETEPIVK                                | 1256.4             | 2            | 3.0142 | 0.1956 |
| QLQALSSELAQARDETKKTQNDVLHAENVK             | 3366.7             | 3            | 6.022  | 0.4011 |
| QLQEELAHEHQVPVEKLQK                        | 2147.4             | 3            | 3.9368 | 0.1588 |
| QLQEERPELSESELTR                           | 1945.1             | 2            | 3.1025 | 0.3136 |
| QLQEETPPGGPLTEALPPAR                       | 2102.3             | 2            | 3.0537 | 0.2131 |
| QLQEYLAQGGK                                | 1178.3             | 2            | 2.976  | 0.2579 |
| QLQFLETQLAQVSQHVSDLEEQKK                   | 2828.1             | 3            | 4.3398 | 0.3019 |
| QLQGPEKEPPKPEQVESR                         | 2077.3             | 3            | 3.9863 | 0.2508 |
| QLQIILSKMQDIPIYANVHK                       | 2353.8             | 3            | 3.4225 | 0.147  |
| QLQLAQEAAQK                                | 1228.4             | 2            | 2.856  | 0.2068 |
| QLQLITSLKEQAIGEYEDLRAENQK                  | 2919.2             | 3            | 4.5648 | 0.4735 |
| QLQLQNQELLR                                | 1383.6             | 2            | 2.5755 | 0.147  |
| QLQNIIQATSR                                | 1272.4             | 2            | 3.4914 | 0.2517 |
| QLQQAIVTGISNAAQATASDDASQHQGGGGGELAYALNNFDK | 4106.3             | 3            | 6.2237 | 0.426  |
| QLQQELEAFRGQLGDVGALDTVWR                   | 2731.0             | 3            | 3.563  | 0.3613 |
| QLQQQREEKEQHGLQLQSEINQLHSK                 | 3158.4             | 3            | 3.8991 | 0.299  |
| QLQSEQPQTAAAR                              | 1428.5             | 2            | 4.2831 | 0.3802 |
| QLQSEQPQTAAARS                             | 1515.6             | 2            | 4.511  | 0.4017 |
| QLQVVPLFGDMQIELAR                          | 1958.3             | 2            | 2.7012 | 0.2479 |
| QLRADMEDLMSSKDDVGKNVHELEK                  | 2889.2             | 3            | 3.8274 | 0.1426 |
| QLRDAQQDAR                                 | 1201.3             | 2            | 2.7284 | 0.1089 |
| QLREQVNDLFSR                               | 1505.7             | 2            | 2.9165 | 0.2419 |
| QLREYQELMNVK                               | 1551.8             | 2            | 3.8108 | 0.1619 |

| Peptide Sequence                     | Peptide mass (m/z) | Charge State | Xcorr  | DelCn2 |
|--------------------------------------|--------------------|--------------|--------|--------|
| QLREYQELMSVK                         | 1524.8             | 2            | 3.6717 | 0.3242 |
| QLRQTMAKFLQEHLAPKAQEIDRSNEFKNLR      | 3742.3             | 3            | 3.3267 | 0.1119 |
| QLSAFGYVAEILPK                       | 1665.9             | 2            | 3.6577 | 0.2908 |
| QLSILVHPDKNQDDADRAQK                 | 2292.5             | 3            | 3.486  | 0.2451 |
| QLSLARPQAPALHLR                      | 1672.0             | 2            | 3.3207 | 0.185  |
| QLSLPQQEAQK                          | 1270.4             | 2            | 2.8529 | 0.1578 |
| QLSNPQQEVQNIFK                       | 1673.9             | 2            | 4.1358 | 0.3566 |
| QLSPTEAFPVLVGDMDNSGSLNAQVIHQLGPGLR   | 3563.0             | 3            | 3.966  | 0.359  |
| QLSQATAAATNHTTDNGVGPEEESVDPNQYYK     | 3437.5             | 3            | 5.9366 | 0.3879 |
| QLSQSDGDRDLQEHR                      | 1913.0             | 3            | 3.3219 | 0.2929 |
| QLSSGVSEIR                           | 1076.2             | 2            | 2.7246 | 0.2628 |
| QLSSSRPTASVIPSGVEWIK                 | 2200.5             | 2            | 3.6489 | 0.2218 |
| QLSVVPSYNEEK                         | 1492.7             | 2            | 3.1902 | 0.2363 |
| QLTAHLQDVNRELTNQQEASVER              | 2680.9             | 3            | 3.7635 | 0.2103 |
| QLTEKMESDR                           | 1237.4             | 2            | 2.4839 | 0.1277 |
| QLTEMLPSILNQLGADSLTSLR               | 2401.8             | 2            | 5.4831 | 0.436  |
| QLTLLGGPTPNTGAALFVLR                 | 2169.5             | 2            | 4.4782 | 0.4346 |
| QLTVQMMQNPQILAALQER                  | 2213.6             | 2            | 5.9532 | 0.4439 |
| QLTVQMMQNPQILAALQERLDGLVETPTGYIESLPR | 4055.7             | 3            | 5.6471 | 0.3704 |
| QLTVTQQSQEEVAR                       | 1617.7             | 2            | 4.2409 | 0.3502 |
| QLVARPDVEMHDVTAQDPK                  | 2249.5             | 3            | 4.5952 | 0.2638 |
| QLVDTTVELANKVGAAEIIISR               | 2228.5             | 2            | 2.7323 | 0.1925 |
| QLVEKGPQYGTVEK                       | 1576.8             | 2            | 2.6768 | 0.1699 |
| QLVEQVEQIQK                          | 1342.5             | 2            | 4.0236 | 0.1759 |
| QLVFHIGHGDLGSPAVLVSRL                | 2103.4             | 2            | 3.9516 | 0.4278 |
| QLVHELDEAEYR                         | 1502.6             | 2            | 3.3167 | 0.3276 |
| QLVHSFTEGR                           | 1174.3             | 2            | 2.9769 | 0.4111 |
| QLVMNHHMHEDQQVR                      | 1903.1             | 2            | 2.6127 | 0.3005 |
| QLVSEGNHADKIR                        | 1580.8             | 2            | 3.0846 | 0.4157 |
| QLVSKPLSSSVSNNKR                     | 1745.0             | 2            | 4.0963 | 0.3498 |
| QLWGLLIEETEK                         | 1615.9             | 2            | 3.4095 | 0.2547 |
| QLYEEEIRELQSQISDTSVVLMSMDNSR         | 3171.4             | 3            | 5.6615 | 0.4967 |
| QLYEFDIKVPLLVR                       | 1734.1             | 2            | 4.0524 | 0.3488 |
| QLYESLMAAHSR                         | 1477.7             | 2            | 2.5814 | 0.1303 |
| QLYHLGVVEAYSGLTK                     | 1779.0             | 2            | 3.5978 | 0.3072 |
| QLYVLGHEAMK                          | 1289.5             | 2            | 3.1812 | 0.2458 |

| Peptide Sequence                       | Peptide mass (m/z) | Charge State | Xcorr  | DelCn2 |
|----------------------------------------|--------------------|--------------|--------|--------|
| QLYVLGHEAMKR                           | 1445.7             | 3            | 3.5496 | 0.3459 |
| QMADTGKLNLLQR                          | 1589.8             | 2            | 3.721  | 0.3935 |
| QMAEIAVNAVLTVADMER                     | 1962.3             | 2            | 3.1354 | 0.2855 |
| QMAYENLNKDKQELGEYLAR                   | 2401.6             | 3            | 6.2094 | 0.4811 |
| QMEQISQFLQAAER                         | 1679.9             | 3            | 5.0666 | 0.401  |
| QMFAQMYQK                              | 1175.4             | 2            | 2.4443 | 0.1331 |
| QMFEGEVASLEALR                         | 1580.8             | 2            | 4.3125 | 0.3757 |
| QMFGNADMNTFPTFK                        | 1750.0             | 2            | 3.7995 | 0.3346 |
| QMFGNADMNTFPTFKFEDPKFEVIEKPQA          | 3408.8             | 3            | 3.7968 | 0.2665 |
| QMGFPLIYVEAEQVEDRLLR                   | 2522.9             | 3            | 3.3388 | 0.1745 |
| QMIAVADENQNHLEPEEVLYSEFFTGSK           | 3492.8             | 3            | 3.3708 | 0.1717 |
| QMIGYNLTK                              | 1139.4             | 2            | 2.42   | 0.2706 |
| QMKDKQDEEQR                            | 1435.5             | 2            | 2.7538 | 0.2046 |
| QMNDEKTAADYK                           | 1414.5             | 2            | 3.0273 | 0.1924 |
| QMNQTLQDKTNQIDLLQAEISENQAIQK           | 3357.7             | 3            | 5.1448 | 0.2836 |
| QMQLVHPAAR                             | 1151.4             | 2            | 2.4496 | 0.1683 |
| QMTAIGPSTIRDLAVAGPEMQVK                | 2543.9             | 3            | 4.1839 | 0.2188 |
| QMVIDVLHPGK                            | 1237.5             | 2            | 2.9412 | 0.2303 |
| QMVIDVLHPGKATVPK                       | 1734.1             | 2            | 4.5706 | 0.3316 |
| QMVKEGGIR                              | 1018.2             | 2            | 2.5035 | 0.1784 |
| QNALLFAEEEDGEAGAE                      | 1793.8             | 2            | 4.3628 | 0.3547 |
| QNALLFAEEEDGEAGAED                     | 1908.9             | 2            | 5.4042 | 0.5061 |
| QNCELFEQLGEYK                          | 1601.8             | 2            | 4.1646 | 0.3012 |
| QNCELFEQLGEYKFNALLVR                   | 2543.9             | 3            | 5.1375 | 0.4352 |
| QNDQVSFASLVEELKK                       | 1836.0             | 3            | 4.1314 | 0.3087 |
| QNFTEPTAIQAQGWPVALSGLDMVGVAQTGSGK      | 3360.7             | 3            | 5.7494 | 0.55   |
| QNISPDKIPWSALK                         | 1597.8             | 2            | 2.7953 | 0.1443 |
| QNKLEQVEKELLR                          | 1627.9             | 2            | 3.7493 | 0.2952 |
| QNLFQEAEEFLYR                          | 1687.8             | 2            | 4.6199 | 0.2978 |
| QNLFTTWSHHLQQANIQFR                    | 2370.6             | 3            | 4.3146 | 0.3729 |
| QNLLQAAGNVGQASGELLQQIGESDTPHFQDALMQLAK | 4138.5             | 3            | 4.0013 | 0.2808 |
| QNLLSQSHAYQQFLR                        | 1834.0             | 3            | 3.3208 | 0.1393 |
| QNLSKEELIAELQDCEGLIVR                  | 2401.7             | 3            | 3.7592 | 0.2511 |
| QNLSQFEAQR                             | 1292.4             | 2            | 3.4217 | 0.3002 |
| QNLSQVPEADSVSFLQELLALR                 | 2458.8             | 3            | 4.2243 | 0.3196 |
| QNNYQVLLGIK                            | 1419.6             | 2            | 3.3377 | 0.28   |

| Peptide Sequence                       | Peptide mass (m/z) | Charge State | Xcorr  | DelCn2 |
|----------------------------------------|--------------------|--------------|--------|--------|
| QNPKEIHTLAQLISAYSLVDPEKAK              | 2781.2             | 3            | 3.49   | 0.31   |
| QNFYDTQVIKQENESGYER                    | 2477.6             | 3            | 3.8281 | 0.235  |
| QNQLLLERQSLSEEVDVDR                    | 2058.2             | 2            | 2.8168 | 0.1344 |
| QNRDEVLDNLLAFVCDIRPEIHENYR             | 3173.5             | 3            | 3.7138 | 0.2592 |
| QNRFEIVYNLLSLR                         | 1766.0             | 3            | 4.4501 | 0.3226 |
| QNSLTQFMSIPSSVIHPAMVR                  | 2344.7             | 3            | 3.7356 | 0.1981 |
| QNVQVFEFQLTAEDMK                       | 1928.2             | 2            | 4.5899 | 0.3703 |
| QNVQVFEFQLTSEEMK                       | 1958.2             | 2            | 4.398  | 0.4295 |
| QNVQVFEFQLTSEEMKAIDGLNR                | 2698.0             | 3            | 3.4945 | 0.287  |
| QNYHQDSEAAINR                          | 1546.6             | 2            | 3.5771 | 0.3453 |
| QNYVDLVSSLSPSLESSSQVEPGTDR             | 2796.0             | 2            | 2.4559 | 0.1859 |
| QNYVDLVSSLSPSLESSSQVEPGTDRK            | 2924.1             | 3            | 3.9679 | 0.2822 |
| QPAENVNQYLTPDK                         | 1617.7             | 2            | 3.476  | 0.3474 |
| QPELPEVIAMLGFR                         | 1600.9             | 2            | 2.5775 | 0.1565 |
| QPPLLDGHPAEYGGPHGGYHSHYHDEGYGPPPPHYEGR | 4177.4             | 3            | 4.0082 | 0.3286 |
| QPPDSSEEAPPATQNFIIPK                   | 2264.5             | 3            | 3.9968 | 0.2017 |
| QQAAYYAQTSPQGMPPHPPAPQGQ               | 2582.8             | 3            | 5.03   | 0.4541 |
| QQADFVDLSFPTISSTGPNGAIIHYAPVPETNR      | 3544.9             | 3            | 4.4577 | 0.3863 |
| QQDAQEFFLHLINMVER                      | 2119.4             | 3            | 3.9221 | 0.3858 |
| QQDVLGFLEANK                           | 1362.5             | 2            | 2.8103 | 0.241  |
| QQDVLGFLEANKIGFEEKDIAANEENRK           | 3207.5             | 3            | 4.6564 | 0.3782 |
| QQEADIQNSKFSYEQLTDLQASR                | 2830.0             | 3            | 3.7941 | 0.2624 |
| QQEELLAENQR                            | 1487.6             | 2            | 3.2321 | 0.2165 |
| QQEPVTSTSLVFGK                         | 1521.7             | 2            | 2.5218 | 0.1687 |
| QQEQADSLER                             | 1204.2             | 2            | 2.8202 | 0.2401 |
| QQETAAAETETR                           | 1335.4             | 2            | 3.2004 | 0.3138 |
| QQETAAAETETRHTLTR                      | 2045.2             | 2            | 2.7357 | 0.1992 |
| QQETHLKQQLALYTEKFEEFQNTLSK             | 3183.5             | 3            | 4.5023 | 0.3856 |
| QQEVVVAGSSLPTSSK                       | 1617.8             | 2            | 4.1702 | 0.3786 |
| QQFEGYGLEIPDILNASNLK                   | 2250.5             | 2            | 4.2141 | 0.4154 |
| QQFMTTQDASK                            | 1285.4             | 2            | 2.4861 | 0.3317 |
| QQFMTTQDASKDGR                         | 1613.7             | 2            | 3.4517 | 0.3196 |
| QQGVLALRPYLQK                          | 1514.8             | 2            | 3.5845 | 0.2677 |
| QQHLSSLQDYMQR                          | 1634.8             | 2            | 2.7632 | 0.3202 |
| QQHQEQQALQQSTTAK                       | 1855.0             | 3            | 4.5671 | 0.4065 |
| QQHVIETLIGK                            | 1266.5             | 2            | 2.5022 | 0.3145 |

| Peptide Sequence                        | Peptide mass (m/z) | Charge State | Xcorr  | DelCn2 |
|-----------------------------------------|--------------------|--------------|--------|--------|
| QQIAEIEKQTKEQSQLTATQTR                  | 2560.8             | 3            | 4.4534 | 0.293  |
| QQIESEVANLKK                            | 1387.6             | 2            | 2.7122 | 0.121  |
| QQIQSIQQSIER                            | 1458.6             | 2            | 3.4196 | 0.2653 |
| QQKLEQLELEKQKLQEEQENAPEFVK              | 3185.5             | 3            | 4.4274 | 0.2213 |
| QQLAQYQQQQSQASAPSTSR                    | 2236.3             | 3            | 3.7734 | 0.17   |
| QQLELLEEDKKELELK                        | 1986.3             | 2            | 3.586  | 0.2038 |
| QQLGTAVEMEIAQMLENSR                     | 2278.6             | 2            | 2.4146 | 0.222  |
| QQLNIHGLLPPSFNSQEIQVLR                  | 2532.9             | 3            | 4.7797 | 0.3183 |
| QQLNNSFAEIIIMGYK                        | 1888.2             | 2            | 3.1778 | 0.2119 |
| QQLQALSEPQPR                            | 1395.5             | 2            | 3.4618 | 0.235  |
| QQLQQVPGLLHR                            | 1417.6             | 2            | 2.5306 | 0.129  |
| QQLSAEELDAQLDAYNAR                      | 2036.1             | 2            | 5.7788 | 0.5001 |
| QQLSEMKSHVEDGDIAGAPASSPEAPPAEQDPVQLK    | 3759.1             | 3            | 5.6695 | 0.4804 |
| QQLVASHLEKLLGPDAAINLTPDGLAKR            | 3156.6             | 3            | 5.4324 | 0.5176 |
| QQLVDKHSTGGVGDK                         | 1569.7             | 2            | 2.935  | 0.2648 |
| QQLVELVAEQADLEQTFNPSDPDCVDRLLQCTR       | 3776.2             | 3            | 5.2183 | 0.347  |
| QQMAEEMVEAAGEDERELAAEMAAFLNENLPESIFGAPK | 4339.8             | 3            | 4.6303 | 0.3668 |
| QQMLENQMEVR                             | 1406.6             | 2            | 3.1711 | 0.2026 |
| QQNELAELHANLAR                          | 1607.8             | 2            | 3.7151 | 0.2968 |
| QQPDTELEIQQK                            | 1457.6             | 2            | 3.0097 | 0.1217 |
| QQPEVEVTHETLQR                          | 1694.8             | 2            | 3.2409 | 0.3    |
| QQPMALAVALK                             | 1271.6             | 2            | 2.644  | 0.2613 |
| QQPPDLVEFAVEYFTR                        | 1940.1             | 3            | 4.4693 | 0.4977 |
| QQPPNSFSQQHSETQGAEKPDPESSHSPPR          | 3316.4             | 3            | 4.0266 | 0.1959 |
| QQPTQFINPETPGYVGFANLPNQVHR              | 2954.2             | 3            | 4.7746 | 0.4109 |
| QQQEELEAEHGTGDKPAAPR                    | 2192.3             | 3            | 3.7819 | 0.2715 |
| QQQEKGEAEALSR                           | 1474.6             | 2            | 2.8658 | 0.1253 |
| QQQKAQLEQLEVQ                           | 1570.7             | 2            | 4.779  | 0.2466 |
| QQQPLALTQQEQQQQPLTLPQQQR                | 2859.1             | 3            | 5.5618 | 0.3995 |
| QQQQQQNDVVK                             | 1343.4             | 2            | 3.1677 | 0.2591 |
| QQQVEAVELEAK                            | 1372.5             | 2            | 2.7834 | 0.1524 |
| QQQVLPLDPAEPEIR                         | 1733.9             | 2            | 2.7815 | 0.1929 |
| QQREDITQSAQHALR                         | 1781.9             | 2            | 5.0438 | 0.4419 |
| QQRNEVSFVIHNLPVLAK                      | 2093.4             | 3            | 4.8855 | 0.3204 |
| QQSEEDLLLQDFSR                          | 1708.8             | 2            | 4.456  | 0.4518 |
| QQSHFAMMHGGTGFAGIDSSSPEVK               | 2607.9             | 2            | 4.2578 | 0.3865 |

| Peptide Sequence                 | Peptide mass (m/z) | Charge State | Xcorr  | DelCn2 |
|----------------------------------|--------------------|--------------|--------|--------|
| QQSIAGSADSKPIDVSR                | 1759.9             | 2            | 4.0338 | 0.5137 |
| QQSLETAMSFVAR                    | 1468.7             | 2            | 3.4176 | 0.3588 |
| QQSPGLGRPIWLQIAESAYR             | 2271.6             | 3            | 3.4055 | 0.2016 |
| QQTHMLDVMQDHFSR                  | 1874.1             | 3            | 3.6344 | 0.4411 |
| QQVAFYGQTLGQAQHSSEQ              | 2220.3             | 3            | 4.303  | 0.2509 |
| QQVAPTDDDETGKELVLALYDYQEK        | 2755.0             | 3            | 3.9757 | 0.2526 |
| QQVASLETNDPILGFQATNER            | 2332.5             | 2            | 3.7032 | 0.314  |
| QRDEKDEHGR                       | 1270.3             | 2            | 3.1497 | 0.1645 |
| QRDSEMGQQSLLFQIDYPEIAEGIMPR      | 3153.5             | 3            | 4.8223 | 0.2495 |
| QRDYILEGEPGKVSNLQYLHSYLYIK       | 3229.6             | 3            | 3.6502 | 0.2197 |
| QREEEIEAQEK                      | 1389.5             | 2            | 3.4565 | 0.1781 |
| QREEELELIDQLRK                   | 1800.0             | 3            | 3.9146 | 0.1391 |
| QREEIKFSHTE                      | 1404.5             | 2            | 2.4719 | 0.2363 |
| QREELGQGLQGVEQK                  | 1699.8             | 2            | 4.3609 | 0.2355 |
| QREELGQGLQGVEQKVQSLQATFGTFESILR  | 3478.9             | 3            | 5.0072 | 0.333  |
| QREEYQPATPGLGMFVEVKDPEDK         | 2765.0             | 3            | 4.5922 | 0.3098 |
| QREIEMNR                         | 1076.2             | 2            | 2.545  | 0.1496 |
| QRELAEQELEKQR                    | 1657.8             | 3            | 3.7185 | 0.2262 |
| QREMEEQMR                        | 1237.4             | 2            | 2.9653 | 0.2772 |
| QREPGLGFSFEFTEQQKEFQATAR         | 2833.1             | 3            | 3.8572 | 0.2259 |
| QREQLDKIQSSHNFQLESVNK            | 2529.8             | 3            | 4.3768 | 0.3089 |
| QRFDHIFYTGNTAVGK                 | 1855.0             | 2            | 3.301  | 0.2314 |
| QRFPLGGDDEVMSSTLQQFSK            | 2371.6             | 3            | 3.728  | 0.263  |
| QRGCVHLREIQSLWVEAR               | 2181.5             | 3            | 4.8712 | 0.1244 |
| QRHELLLGAGSGPGAGQQQATPGALLQAGPPR | 3135.5             | 3            | 7.0381 | 0.5444 |
| QRHPFLLLGTANR                    | 1624.9             | 3            | 3.9095 | 0.3087 |
| QRLDEYKR                         | 1108.2             | 2            | 2.9675 | 0.13   |
| QRMDLVEAFNHSR                    | 1603.8             | 2            | 3.5635 | 0.2147 |
| QRPAAGAPPELHSLR                  | 1600.8             | 3            | 3.298  | 0.1587 |
| QRPEPQVTGTVGLHLGVTPSVIR          | 2442.8             | 3            | 3.6605 | 0.124  |
| QRPIHLSFDIDAFDPTLAPATGTPVVGGLTYR | 3427.9             | 3            | 5.388  | 0.381  |
| QRQEELCLAR                       | 1246.4             | 2            | 3.144  | 0.281  |
| QRQEVCSYK                        | 1269.4             | 2            | 3.142  | 0.2191 |
| QRQLAEEDAAR                      | 1287.4             | 2            | 3.0828 | 0.2851 |
| QRQPPGTQQSHSSPGEITSSPQGLDNPALLR  | 3285.5             | 3            | 3.8164 | 0.212  |
| QRRPLRPQVVTDDDGQAPEAK            | 2377.6             | 3            | 3.251  | 0.2308 |

| Peptide Sequence                     | Peptide mass (m/z) | Charge State | Xcorr  | DelCn2 |
|--------------------------------------|--------------------|--------------|--------|--------|
| QRRSESPDSRKRRIRHRCDFEGCNKVYTK        | 3453.9             | 3            | 3.5896 | 0.1492 |
| QRSQVEEELFSVR                        | 1607.8             | 2            | 3.3041 | 0.3003 |
| QRVDVEDLGVDFLTIVGHK                  | 2141.4             | 3            | 6.2928 | 0.4124 |
| QRVEAAVGEDLFQEAHEVILK                | 2382.7             | 3            | 7.6348 | 0.4496 |
| QRVLGPGPHALQLEER                     | 1801.0             | 2            | 2.8698 | 0.108  |
| QRYEDQLKQQQLLNEENLR                  | 2446.7             | 3            | 4.5158 | 0.2956 |
| QRYEILTPNAIPK                        | 1543.8             | 2            | 3.4363 | 0.2424 |
| QRYEILTPNSIPK                        | 1559.8             | 2            | 3.6707 | 0.2357 |
| QSAEKLIIEKGAVEALAAALAHISGATSVDQR     | 3265.6             | 3            | 4.1339 | 0.3044 |
| QSAERNNSNLVGAHEELQQSR                | 2325.4             | 3            | 3.8189 | 0.2522 |
| QSDDEVYAPGLDISSLKQLAER               | 2564.7             | 3            | 4.2425 | 0.2737 |
| QSDEVGDRDHR                          | 1314.3             | 2            | 2.5838 | 0.1281 |
| QSDVMIVAGTLTNK                       | 1477.7             | 2            | 4.5728 | 0.4018 |
| QSEGLTKEYDRLLLEEHAK                  | 2147.3             | 3            | 3.4747 | 0.2427 |
| QSFHAVTPGYDFMAR                      | 1647.8             | 2            | 2.9743 | 0.1038 |
| QSFTMVADTPENLR                       | 1609.8             | 2            | 4.391  | 0.4216 |
| QSGAFLSTSEGLILQLVGDAVHPQFK           | 2744.1             | 3            | 5.0165 | 0.5122 |
| QSGAFLSTSEGLILQLVGDAVHPQFKEIQK       | 3242.7             | 3            | 3.8881 | 0.3164 |
| QSHLLLQSSIPDQQLLK                    | 1949.2             | 2            | 4.7063 | 0.419  |
| QSHSESPSLQSK                         | 1315.4             | 2            | 2.8682 | 0.2782 |
| QSHTLPFPPPPALPFYPASAYPR              | 2552.9             | 3            | 6.4528 | 0.3725 |
| QSIINPDWNFEK                         | 1491.6             | 2            | 3.7732 | 0.2942 |
| QSINTIESLKDVKDAVVQHSQLAAAVENLK       | 3250.6             | 3            | 5.2447 | 0.4408 |
| QSIWTSTISSHLATK                      | 1660.9             | 2            | 4.718  | 0.4068 |
| QSKPVTTPPEEIAQVATISANGDKEIGNIISDAMK  | 3558.0             | 3            | 4.9048 | 0.4475 |
| QSKPVTTPPEEIAQVATISANGDKEIGNIISDAMKK | 3686.1             | 3            | 3.6457 | 0.3016 |
| QSLQVIESAMER                         | 1391.6             | 2            | 2.7747 | 0.103  |
| QSMAFSILNTPK                         | 1337.6             | 2            | 3.5682 | 0.2903 |
| QSPENASPQATNSTQVSPSGAMTR             | 2646.8             | 3            | 3.8801 | 0.3093 |
| QSPQLPQAFYPVGHVPDVSFGDLLAAR          | 2911.3             | 3            | 4.0428 | 0.4875 |
| QSPVAMETASTGVAGVSSAMDHTFSTTSK        | 2887.2             | 3            | 3.8497 | 0.3789 |

| Peptide Sequence                     | Peptide mass (m/z) | Charge State | Xcorr  | DelCn2 |
|--------------------------------------|--------------------|--------------|--------|--------|
| QSPVDIDHTAK                          | 1312.4             | 2            | 3.2706 | 0.2691 |
| QSPVDIDHTAKYDPSLKPLSVSYDQATSLR       | 3434.8             | 3            | 3.4551 | 0.2693 |
| QSQADYETR                            | 1098.1             | 2            | 2.801  | 0.2122 |
| QSQEASNHSSHTAQTPI                    | 1880.9             | 2            | 2.5656 | 0.236  |
| QSQHDKIDASELSFPFHESILK               | 2557.8             | 3            | 3.9457 | 0.1846 |
| QSRGEPPLPEEDLSKLFKPPQPPAR            | 2815.2             | 3            | 3.4691 | 0.1458 |
| QSRLEQEEQRLAELSK                     | 2073.3             | 3            | 3.2914 | 0.1356 |
| QSSATSSFGGLGGGSV                     | 1399.4             | 2            | 4.388  | 0.346  |
| QSSATSSFGGLGGGSVR                    | 1555.6             | 2            | 4.654  | 0.4488 |
| QSSGASSSSFSSSR                       | 1362.3             | 2            | 2.7016 | 0.13   |
| QSSGPGASSGTSGDHGELVVR                | 1986.0             | 2            | 3.1015 | 0.2696 |
| QSSSSTTSQGGVKR                       | 1410.5             | 2            | 2.5338 | 0.3072 |
| QSSSTNYTNELK                         | 1372.4             | 2            | 2.7867 | 0.255  |
| QSSVAEEVGLLPQQIQAVRDDVESQFPAWISQFLAR | 4044.5             | 3            | 4.4088 | 0.3874 |
| QSTSFLVLQEILESEEKGDPNKPSGFR          | 3037.3             | 3            | 3.5184 | 0.1874 |
| QSTTHLADGPFVAVLVYIR                  | 2104.4             | 3            | 3.6522 | 0.2261 |
| QSVEDILKDHQK                         | 1626.8             | 2            | 2.835  | 0.2233 |
| QSVENDIHGLR                          | 1268.4             | 2            | 2.6388 | 0.3083 |
| QSVENDIHGLRK                         | 1396.5             | 2            | 3.0098 | 0.3172 |
| QSVFKDFEYELPEK                       | 1759.9             | 2            | 2.8866 | 0.2518 |
| QSVFPFESGKPFK                        | 1498.7             | 2            | 3.079  | 0.2929 |
| QSVHIVENEIQASIDQIFSR                 | 2314.5             | 3            | 3.679  | 0.2161 |
| QSVLEGLSFSR                          | 1223.4             | 2            | 3.265  | 0.3    |
| QSVLNLMTHSVQGGQNIHR                  | 2177.4             | 3            | 3.2813 | 0.1704 |
| QSVYEEKLKQFEER                       | 1814.0             | 2            | 3.0771 | 0.3026 |
| QSYKGSPMEISLPIALSK                   | 1950.3             | 2            | 3.0697 | 0.2519 |
| QTAQQIVSHVQNK                        | 1481.6             | 2            | 3.4409 | 0.3385 |
| QTASVTLQAIAAQNAAVQAVNAHSNILK         | 2834.2             | 3            | 5.5387 | 0.4612 |
| QTDDLGRGEIIVLEATVQNNQDER             | 2615.8             | 3            | 4.6616 | 0.3439 |
| QTDVGITHFR                           | 1174.3             | 2            | 2.5352 | 0.2805 |
| QTDVLQQLSIQMANAK                     | 1789.0             | 3            | 4.3266 | 0.3248 |
| QTELESLSSELSVLK                      | 1793.0             | 2            | 2.8132 | 0.1351 |
| QTELFHFQIPAAQK                       | 1730.0             | 2            | 2.7748 | 0.2728 |
| QTESLESLLSK                          | 1235.4             | 2            | 2.8185 | 0.2219 |
| QTESLESLLSKSQEHEQR                   | 2130.3             | 2            | 3.9112 | 0.4214 |
| QTEVLLQPNPNAR                        | 1480.7             | 2            | 3.2777 | 0.1244 |



| Peptide Sequence                         | Peptide mass (m/z) | Charge State | Xcorr  | DelCn2 |
|------------------------------------------|--------------------|--------------|--------|--------|
| QFTFHNPLLPQPKDNPPNIPSSSSKPK              | 2931.3             | 3            | 4.6894 | 0.2999 |
| QTGQWIGMVENFNQALKEIGDVENWAR              | 3135.5             | 3            | 3.5508 | 0.3176 |
| QTIDNSQGAYQEAFDISK                       | 2016.1             | 2            | 5.6105 | 0.4915 |
| QTIDNSQGAYQEAFDISKK                      | 2144.3             | 2            | 4.7777 | 0.4049 |
| QTIERLEQEHTNR                            | 1654.8             | 2            | 2.7541 | 0.1555 |
| QTIGNSCGTIGLIHAVANNQDKLGFEDGSVLK         | 3301.7             | 3            | 5.4977 | 0.3746 |
| QTIMETLEQGPASPSYVPLFKDIVVPSLNVAK         | 3673.2             | 3            | 4.185  | 0.2702 |
| QTISEKEVELQHIR                           | 1710.9             | 3            | 3.5537 | 0.2757 |
| QTLENERGELANEVK                          | 1730.9             | 2            | 3.9074 | 0.2957 |
| QTLSTPGTIILGTIPVPK                       | 1837.2             | 2            | 3.7059 | 0.2727 |
| QTMQVDEHARPQTTLEQLQK                     | 2382.6             | 3            | 3.6357 | 0.3161 |
| QTNLENLDQAFSVAER                         | 1836.0             | 2            | 3.7356 | 0.3678 |
| QTNPSAMEVEEDDPVPEIR                      | 2157.3             | 2            | 4.5478 | 0.396  |
| QTNPSAMEVEEDDPVPEIRR                     | 2313.5             | 2            | 2.7661 | 0.2593 |
| QTQIFTTYSNQPGLIQLVYEGER                  | 2788.0             | 2            | 6.9521 | 0.4669 |
| QTQTFTTYSNQPGLIQLVYEGER                  | 2776.0             | 3            | 6.4815 | 0.509  |
| QTQVSVLPEGGETPLFK                        | 1831.1             | 2            | 4.2663 | 0.3931 |
| QTSGGPVDASSEYQQELER                      | 2082.1             | 2            | 5.5901 | 0.562  |
| QTSGGPVDASSEYQQELERELFK                  | 2599.7             | 2            | 3.2542 | 0.3643 |
| QTTSNLGHNLKPSIQALIHGLNR                  | 2513.8             | 3            | 4.6929 | 0.3664 |
| QTTVSNSQQAYQEAFEISK                      | 2160.3             | 2            | 5.6716 | 0.5092 |
| QTVAVGVK                                 | 915.1              | 1            | 1.86   | 0.202  |
| QTVVSDTELSIVESSVISLLQEAESKSELSQNISAR     | 3879.2             | 3            | 3.7315 | 0.3597 |
| QTYFLPVIQLVDAEK                          | 1694.0             | 2            | 3.7569 | 0.3601 |
| QTYSTEPNNLK                              | 1295.4             | 2            | 2.7516 | 0.2615 |
| QVAAVGQEPQVFGR                           | 1486.7             | 2            | 3.5168 | 0.4715 |
| QVAGTMKLELAQYR                           | 1608.9             | 2            | 3.1199 | 0.2886 |
| QVAGTMKLELAQYREVAFAQFGSDLDAATQQLLSR      | 3929.4             | 3            | 5.305  | 0.3876 |
| QVAQQEAER                                | 1059.1             | 2            | 2.667  | 0.1542 |
| QVASHVGLHSASIPGILALDLCPSDTNK             | 2845.2             | 3            | 6.0622 | 0.3792 |
| QVATALQNLQTK                             | 1315.5             | 2            | 3.1568 | 0.2541 |
| QVAVAELLENVGVNEHDGGAQPGPVPK              | 2854.1             | 3            | 4.7394 | 0.4027 |
| QVDQLTNDKAR                              | 1288.4             | 2            | 2.4327 | 0.1024 |
| QVDVPTLTGAFGILAAHVPTLQVLRPGLVVVHAEDGTTSK | 4109.7             | 3            | 4.0063 | 0.3476 |
| QVEDDIQQLLKK                             | 1457.7             | 2            | 2.8579 | 0.1164 |
| QVEEALHQLHAR                             | 1431.6             | 2            | 3.309  | 0.3438 |

| Peptide Sequence                      | Peptide mass (m/z) | Charge State | Xcorr  | DelCn2 |
|---------------------------------------|--------------------|--------------|--------|--------|
| QVEGKNPVTIFSLATNEMWR                  | 2321.6             | 2            | 3.6966 | 0.3639 |
| QVEHPLLSGLLYPGLQALDEEYLK              | 2727.1             | 3            | 4.7914 | 0.4402 |
| QVEHPLLSGLLYPGLQALDEEYLKVDAQFGGIDQR   | 3914.4             | 3            | 3.6379 | 0.2695 |
| QVEILNRYPHFK                          | 1544.8             | 2            | 3.1471 | 0.3914 |
| QVENAGAIGPSR                          | 1199.3             | 2            | 2.6024 | 0.1839 |
| QVEVDCQQCMLEILDTAGTEQFTAMR            | 2961.4             | 2            | 3.0154 | 0.1809 |
| QVEVFRQNLQAEAEFLYR                    | 2446.7             | 3            | 3.6366 | 0.2525 |
| QVEYLVNEKHIYLLPSGR                    | 2159.5             | 2            | 4.6717 | 0.4459 |
| QVFAENKDEIALVLFQTDGTDNPLSGGDQYQNITVHR | 4064.4             | 3            | 4.7832 | 0.207  |
| QVFFELNGQLR                           | 1351.5             | 2            | 2.7915 | 0.1299 |
| QVFGAATK                              | 880.0              | 1            | 1.9398 | 0.1159 |
| QVFGAATKQPGITFIAAK                    | 1907.2             | 2            | 4.7083 | 0.4156 |
| QVFGAATKQPGITFIAAKFDGILGMAYPR         | 3128.6             | 3            | 6.3898 | 0.4913 |
| QVGETSAPGDTLDGTPR                     | 1701.8             | 2            | 3.7904 | 0.268  |
| QVHPDTGISSK                           | 1169.3             | 1            | 2.2233 | 0.361  |
| QVHPDTGISSKAMGIMNSFVNDIFER            | 2895.3             | 3            | 3.6545 | 0.2655 |
| QVHPFHVYPQPGMQR                       | 1822.1             | 2            | 2.9076 | 0.1251 |
| QVIDVLETDKHFR                         | 1600.8             | 2            | 3.4178 | 0.2481 |
| QVIPGLEQSLLDMCVGEK                    | 1960.3             | 2            | 2.7829 | 0.3071 |
| QVIQGLEALKNEHNSILQSLLLETLK            | 2820.2             | 3            | 4.7469 | 0.3936 |
| QVIQQNPALLPALLQQLGQENPQLLQQISR        | 3380.9             | 3            | 6.7431 | 0.5359 |
| QVKIDQIEDLQDQLEDMMEDANEIQEALSR        | 3548.9             | 3            | 5.228  | 0.3409 |
| QVKPYVEEGLHPQIIIR                     | 2020.4             | 2            | 3.6557 | 0.3805 |
| QVLALQSQLADTK                         | 1415.6             | 2            | 2.9831 | 0.2507 |
| QVLDLEDLVFTQGSHFMANKR                 | 2449.8             | 3            | 3.302  | 0.1649 |
| QVLDSKAPKPEDIDEEDDDVPDLVENFDEASKNEAN  | 4032.2             | 3            | 3.5993 | 0.2028 |
| QVLEELTELPVMVELASDFLDR                | 2547.9             | 3            | 4.5506 | 0.5081 |
| QVLEGEEIAYK                           | 1279.4             | 2            | 2.7125 | 0.2305 |
| QVLFSADDRVK                           | 1278.4             | 2            | 3.0614 | 0.2248 |
| QVLGQMVIDEELLGDGHSYSR                 | 2444.7             | 3            | 4.2075 | 0.4897 |
| QVLHGEALAGQAK                         | 1322.5             | 2            | 2.9032 | 0.3027 |
| QVLKYDDFLK                            | 1269.5             | 2            | 2.6867 | 0.1558 |
| QVLLSAAEAAEVILR                       | 1583.9             | 2            | 5.0031 | 0.4647 |
| QVLLSAAEAAEVILRVDNIIK                 | 2266.7             | 3            | 3.774  | 0.2523 |
| QVLLSEPEEAAALYR                       | 1689.9             | 2            | 4.2302 | 0.3589 |
| QVLLYEPQVNSPKDFTEGTLFSVNQEFSLIK       | 3573.0             | 3            | 4.3091 | 0.2851 |

| Peptide Sequence                     | Peptide mass (m/z) | Charge State | Xcorr  | DelCn2 |
|--------------------------------------|--------------------|--------------|--------|--------|
| QVLQLQASHR                           | 1180.3             | 2            | 3.5093 | 0.2846 |
| QVLQLQASHRESEEALQK                   | 2095.3             | 2            | 4.3458 | 0.3424 |
| QVLQSTQSPR                           | 1144.3             | 2            | 3.051  | 0.2779 |
| QVLSSLLSGALAGALAK                    | 1599.9             | 2            | 3.2306 | 0.2825 |
| QVMMFSATLSK                          | 1243.5             | 2            | 2.5924 | 0.259  |
| QVMYQSSGR                            | 1184.3             | 2            | 2.417  | 0.1465 |
| QVNEMKNSMSETVR                       | 1653.9             | 2            | 3.4875 | 0.3298 |
| QVPGGGGGGSGGGGGSGGGGSGGGR            | 1844.8             | 2            | 4.1374 | 0.4432 |
| QVPNESFFNFFNPLK                      | 1829.0             | 2            | 3.9693 | 0.2816 |
| QVQFHQGFGLAVLKPSNK                   | 2114.4             | 3            | 3.6826 | 0.1897 |
| QVQHEESTEAGEADHSGYAGELGFR            | 2634.7             | 3            | 4.187  | 0.3639 |
| QVQHILASASPSGR                       | 1451.6             | 2            | 3.5804 | 0.3211 |
| QVQRPGFFMEPTVFTDVEDYMYLAK            | 3013.4             | 3            | 4.7389 | 0.2299 |
| QVQSLMVHQR                           | 1226.4             | 2            | 3.2955 | 0.2049 |
| QVQSLTCEVDALK                        | 1434.6             | 2            | 3.1612 | 0.2423 |
| QVQSLTCEVDALKGTNESLER                | 2321.6             | 2            | 4.8746 | 0.4861 |
| QVQSQAHGLQMR                         | 1383.6             | 2            | 3.1462 | 0.3413 |
| QVQVALETAQR                          | 1243.4             | 2            | 3.5084 | 0.1857 |
| QVREPGQDLVVLPLSITTDIFPSFR            | 2829.2             | 3            | 4.5379 | 0.3235 |
| QVRPVTEK                             | 957.1              | 2            | 2.6239 | 0.2363 |
| QVRPVTEKLPANHPLL TGQR                | 2255.6             | 3            | 4.9144 | 0.3684 |
| QVTD AETKPK                          | 1117.2             | 2            | 2.622  | 0.2101 |
| QVTIKPVATAFLPVSAVKTAGSRVINLK         | 2910.5             | 3            | 3.2351 | 0.1018 |
| QVTITGSAASISLAQYLINAR                | 2178.5             | 3            | 5.3407 | 0.439  |
| QVTITGSAASISLAQYLINVR                | 2206.5             | 3            | 4.5243 | 0.4154 |
| QVTQEEGQQLAR                         | 1387.5             | 2            | 3.0903 | 0.1247 |
| QVVAVTGDGTNDGPALK                    | 1642.8             | 2            | 4.0306 | 0.2368 |
| QVVAVTGDGTNDGPALKK                   | 1771.0             | 2            | 3.5234 | 0.3405 |
| QVVEAAQAPIQER                        | 1439.6             | 2            | 4.2435 | 0.3976 |
| QVVEEIFHPERPDSVDIEHMSSGLTDLLK        | 3322.7             | 3            | 4.6914 | 0.299  |
| QVVNIPSFIVR                          | 1272.5             | 2            | 2.9894 | 0.1947 |
| QVVQTPNTVLSTPFR                      | 1687.9             | 2            | 3.0072 | 0.1768 |
| QVVSASYN SPIGLYSTSNIQDALHGQLR        | 3020.3             | 3            | 3.5745 | 0.2195 |
| QVVSVVQDEEVGLPFEASPESPPPASP DGVT EIR | 3563.9             | 3            | 4.8927 | 0.4213 |
| QVVVEGQEPANFWMALGGK                  | 2061.3             | 2            | 3.5095 | 0.2453 |
| QVYDGF SFIGNTGPYEVSK                 | 2109.3             | 2            | 4.3397 | 0.4773 |

| Peptide Sequence                  | Peptide mass (m/z) | Charge State | Xcorr  | DelCn2 |
|-----------------------------------|--------------------|--------------|--------|--------|
| QVYEEFYGSSLEDDVVGDTSGYYQR         | 2889.9             | 3            | 6.0924 | 0.5991 |
| QVYQIVKPLNPNFCFLQCTSAYPLQPEDVNLR  | 3740.3             | 3            | 5.7032 | 0.3284 |
| QVYVDKLAELK                       | 1306.5             | 2            | 3.1434 | 0.1943 |
| QWIQISDAVYHMYEQAK                 | 2210.5             | 2            | 2.5531 | 0.2085 |
| QWYESHYALPLGR                     | 1620.8             | 2            | 2.5538 | 0.1904 |
| QYAGFSTVEESNKFYKDNIK              | 2369.6             | 3            | 3.5594 | 0.3036 |
| QYAGYDYSQQGR                      | 1436.5             | 2            | 3.8562 | 0.4474 |
| QYALSLANLQMVLEHFQQEEK             | 2520.8             | 3            | 3.4496 | 0.1761 |
| QYASLTGTQALPPLFSLGYHQSR           | 2536.8             | 3            | 4.9854 | 0.3927 |
| QYATLDVYNPFETR                    | 1717.9             | 2            | 3.3928 | 0.3252 |
| QYDADLEQILIQWITTQCR               | 2338.6             | 2            | 3.2797 | 0.2672 |
| QYDGIFYEFR                        | 1338.4             | 2            | 3.1242 | 0.4024 |
| QYEKSENDLKALQSVGQIVGEVLK          | 2677.0             | 3            | 4.4713 | 0.3941 |
| QYELVVHTDIDAAK                    | 1602.8             | 2            | 3.7277 | 0.2485 |
| QYEQQTYQVIPEVIKNFIQYFHK           | 2945.3             | 3            | 3.8251 | 0.2798 |
| QYETLAEMVVPR                      | 1436.7             | 2            | 2.5136 | 0.1153 |
| QYKIPDWFLNR                       | 1480.7             | 3            | 3.46   | 0.2523 |
| QYKPVVYSNTIQSLAAIVR               | 2151.5             | 2            | 3.706  | 0.372  |
| QYLEELQSVQRELEVLSQYSQK            | 2828.1             | 3            | 3.5142 | 0.1328 |
| QYLVFHDGDSVVFAGPAGNSVETR          | 2566.8             | 3            | 5.0401 | 0.2637 |
| QYMEGFNDELEAFKER                  | 2007.2             | 2            | 3.1852 | 0.2718 |
| QYMPWEAALSSLSYFK                  | 1922.2             | 2            | 6.0829 | 0.5032 |
| QYNGVPLDGRPMNIQLVTSQIDAQR         | 2815.2             | 3            | 4.3854 | 0.3109 |
| QYNSFNFALLEDVQAK                  | 1888.1             | 2            | 4.5254 | 0.4223 |
| QYQHGSVSDTVFDSIPANPALLTYPRPGTSR   | 3376.7             | 3            | 5.1383 | 0.4428 |
| QYSHHSSVQDAVSQLDSELMDITK          | 2719.9             | 3            | 3.8108 | 0.2701 |
| QYSIEHVDLGAR                      | 1388.5             | 2            | 2.5984 | 0.2027 |
| QYSLQNWEAR                        | 1295.4             | 2            | 2.607  | 0.2139 |
| QYTSPEEIDAQLQAEK                  | 1851.0             | 2            | 3.0992 | 0.1003 |
| QYTSPEEIDAQLQAEKQK                | 2107.3             | 2            | 3.2647 | 0.425  |
| QYWDEDLLMK                        | 1341.5             | 2            | 2.8101 | 0.1212 |
| QYYQQPTATAAAVAAAAQPQPSVAETYYQTAPK | 3486.8             | 3            | 3.816  | 0.1067 |
| QYYTLLNKAPEYLR                    | 1910.2             | 2            | 4.3979 | 0.3928 |
| QYYTLLNQAPDMLHR                   | 1864.1             | 2            | 4.3591 | 0.4075 |
| RAAAEVNQDYGLDPK                   | 1647.8             | 2            | 3.0442 | 0.2054 |
| RAAATQPDAK                        | 1029.1             | 2            | 3.0021 | 0.2177 |

| Peptide Sequence                    | Peptide mass (m/z) | Charge State | Xcorr  | DelCn2 |
|-------------------------------------|--------------------|--------------|--------|--------|
| RAAATQPDAKDTTPDEPWAFPAR             | 2412.6             | 3            | 3.5092 | 0.2099 |
| RAAEDDEDDVDTKKQK                    | 1979.0             | 3            | 4.2587 | 0.3066 |
| RAAEDDEDDVDTKKQKTDEDD               | 2554.5             | 3            | 4.456  | 0.1259 |
| RAAEEAEEAR                          | 1132.2             | 2            | 3.1886 | 0.2486 |
| RAAEEAER                            | 932.0              | 2            | 2.745  | 0.1149 |
| RAAEEEDEADPKR                       | 1516.6             | 3            | 3.9456 | 0.2383 |
| RAAEERQRAR                          | 1243.4             | 2            | 2.738  | 0.1766 |
| RAAELGAR                            | 844.0              | 2            | 3.0834 | 0.1489 |
| RAAGEVLEPANLLAEKDEDLLFE             | 2672.9             | 3            | 3.9448 | 0.3198 |
| RAASGYPVKVPLEVQEADEAK               | 2258.5             | 3            | 4.0003 | 0.1481 |
| RAASGYPVKVPLEVQEADEAKLQQTEAELR      | 3327.7             | 3            | 7.6043 | 0.5021 |
| RAAVAASSSS                          | 907.0              | 2            | 2.5513 | 0.1812 |
| RAAVIFADTLTLLFEGIAR                 | 2078.4             | 2            | 2.5516 | 0.1328 |
| RADDNATIR                           | 1032.1             | 2            | 2.4704 | 0.2083 |
| RADIKEDKDGK                         | 1275.4             | 2            | 2.5858 | 0.2308 |
| RADLNQGIGEPQSPSR                    | 1725.8             | 2            | 4.4471 | 0.2957 |
| RADPAELR                            | 928.0              | 2            | 2.5946 | 0.1429 |
| RADQLADESLESTR                      | 1591.7             | 2            | 3.9393 | 0.3538 |
| RADQLADESLESTRR                     | 1747.8             | 3            | 3.6894 | 0.2918 |
| RADTFDLQR                           | 1122.2             | 2            | 2.6872 | 0.1092 |
| RADVLAFPSSGFTDLAEIVSR               | 2252.5             | 3            | 5.0517 | 0.4493 |
| RAEAEKQLQQAQAAGAEQEVEKFTK           | 2790.0             | 3            | 4.2802 | 0.269  |
| RAEATAASTSR                         | 1121.2             | 2            | 3.8293 | 0.3526 |
| RAEDGIVLDLPLYPAHPQDFHEVEDLIK        | 3231.6             | 3            | 5.3653 | 0.3249 |
| RAEDGSVIDYELIDQDAR                  | 2066.2             | 3            | 5.9936 | 0.3975 |
| RAEDGSVIDYELIDQDARDLYDAGVK          | 2928.1             | 3            | 5.0969 | 0.3148 |
| RAEDGSVIDYELIDQDARDLYDAGVKR         | 3084.3             | 3            | 4.4723 | 0.3653 |
| RAEDGSVIDYELIDQDARDLYDAGVKRK        | 3212.5             | 3            | 3.9711 | 0.2358 |
| RAEDYPIDLYYLMDSL SYSMKDDLENVK       | 3301.7             | 3            | 4.6369 | 0.3017 |
| RAEFDIHR                            | 1044.1             | 2            | 2.9333 | 0.346  |
| RAEISNAIDQYVTGTIGEDEDLIKWK          | 2966.2             | 3            | 7.2771 | 0.4408 |
| RAENYGPR                            | 963.0              | 2            | 2.8697 | 0.2248 |
| RAEQDSTTVAAFASSLV SGLNSSASEPAKEPAKK | 3436.7             | 3            | 5.7486 | 0.4599 |
| RAESLNGNPLFSK                       | 1433.6             | 2            | 2.7701 | 0.2177 |
| RAEVLALPFKR                         | 1300.6             | 2            | 2.9045 | 0.221  |
| RAEVLGHKTPEPAPR                     | 1658.9             | 2            | 4.3539 | 0.4036 |

| Peptide Sequence                | Peptide mass (m/z) | Charge State | Xcorr  | DelCn2 |
|---------------------------------|--------------------|--------------|--------|--------|
| RAEVNGLAAQGK                    | 1214.4             | 2            | 3.3442 | 0.2262 |
| RAFDSAVAK                       | 965.1              | 2            | 2.4023 | 0.1183 |
| RAFIPLPSAVVQAVFGR               | 1829.2             | 2            | 2.4844 | 0.1068 |
| RAFQMLR                         | 922.1              | 2            | 2.4418 | 0.1084 |
| RAFSEADMERPLQELGLVPSAVLIVAK     | 2941.4             | 3            | 3.6152 | 0.1938 |
| RAGAECGLAR                      | 1004.1             | 2            | 2.6402 | 0.1664 |
| RAGDLLEDSPK                     | 1201.3             | 2            | 3.1647 | 0.1548 |
| RAGELTEDEVER                    | 1404.5             | 2            | 3.8883 | 0.3156 |
| RAGKLDPHLVLDQLR                 | 1732.0             | 2            | 4.0349 | 0.3282 |
| RAGLGSGLSLSGLVHPELSR            | 2007.3             | 3            | 4.9687 | 0.4405 |
| RAIAYATHR                       | 1059.2             | 2            | 2.6573 | 0.218  |
| RAIIPSHLAYGK                    | 1326.6             | 2            | 3.3659 | 0.3343 |
| RAIVHDNKDGTAVTYIPDK             | 2277.5             | 3            | 4.3235 | 0.3769 |
| RAIVHDNKDGTAVTYIPDKTGR          | 2591.9             | 3            | 6.735  | 0.4824 |
| RAKPEGALQNNNDGLYDPDCDESGLFK     | 2854.1             | 3            | 4.7271 | 0.404  |
| RALAAQLPVLPR                    | 1305.6             | 2            | 3.3252 | 0.3313 |
| RALANSLACQGK                    | 1232.4             | 2            | 2.9832 | 0.1789 |
| RALDDTAR                        | 918.0              | 2            | 2.5049 | 0.1478 |
| RALDIPLVK                       | 1025.3             | 2            | 2.7956 | 0.1275 |
| RALEAEQVEITVGRFR                | 1875.1             | 2            | 2.8525 | 0.1103 |
| RALELEQER                       | 1144.3             | 2            | 3.4777 | 0.1487 |
| RALEQQVEEMKTQLEEELEDELQATEDAK   | 3305.6             | 3            | 6.8224 | 0.3526 |
| RALEQQVEEMKTQLEEELEDELQATEDAKLR | 3574.9             | 3            | 3.9437 | 0.2177 |
| RALSSQHQR                       | 1154.3             | 2            | 3.0771 | 0.2013 |
| RANEFLEVGKK                     | 1291.5             | 2            | 2.9792 | 0.1977 |
| RANEMNISPASLASLYEEDFKQDMAALK    | 3144.5             | 3            | 3.6225 | 0.1189 |
| RANNTFYGLSAGVFTK                | 1746.9             | 2            | 4.934  | 0.3645 |
| RAPDQAAEIGSR                    | 1271.4             | 2            | 3.351  | 0.3021 |
| RAPFDLFENK                      | 1237.4             | 2            | 2.9705 | 0.1333 |
| RAPFDLFENKK                     | 1365.6             | 2            | 3.3859 | 0.218  |
| RAPFDLFENR                      | 1265.4             | 2            | 3.4655 | 0.2029 |
| RAPFDLFENRK                     | 1393.6             | 2            | 2.4071 | 0.1298 |
| RAPSSAQYLEEK                    | 1379.5             | 2            | 3.0952 | 0.1202 |
| RAPSSAQYLEEKSDQQKKEELLNAMVAK    | 3193.6             | 3            | 6.4867 | 0.4087 |
| RAQAEQAALR                      | 1114.2             | 2            | 3.3722 | 0.1901 |
| RAQDFVQWLMNTK                   | 1637.9             | 2            | 5.143  | 0.3501 |

| Peptide Sequence                | Peptide mass (m/z) | Charge State | Xcorr  | DelCn2 |
|---------------------------------|--------------------|--------------|--------|--------|
| RAQDFVQWLMNTR                   | 1794.1             | 3            | 4.5567 | 0.3648 |
| RAQEEAEAEER                     | 1318.3             | 2            | 3.9157 | 0.3561 |
| RAQEEAEAEERRLQEQEELENYIEHVLLR   | 3611.9             | 3            | 4.946  | 0.3816 |
| RAQGWQGLKEYDQALADLKK            | 2319.6             | 3            | 3.9744 | 0.2683 |
| RAQHNEVER                       | 1139.2             | 2            | 2.8477 | 0.2874 |
| RAQLADSFHLQQFFR                 | 1865.1             | 3            | 4.2264 | 0.3174 |
| RAQPFVAAANIDDKR                 | 1672.9             | 3            | 5.2122 | 0.3532 |
| RAQQQAEAEER                     | 1187.2             | 2            | 2.8947 | 0.2272 |
| RAQQQLENGFK                     | 1319.5             | 2            | 2.8424 | 0.2707 |
| RAQSELAAHQK                     | 1239.4             | 3            | 3.4382 | 0.1664 |
| RASAYEAEKYPMAYVDYK              | 2269.6             | 2            | 3.1767 | 0.3448 |
| RASPSKPASAPASR                  | 1383.5             | 2            | 4.3983 | 0.3182 |
| RASRAPSKQRYVQEVNRR              | 2219.6             | 3            | 3.2926 | 0.1067 |
| RATASEQPLAQEPPASGGSPATTK        | 2353.5             | 3            | 3.9893 | 0.2373 |
| RATISNPITGDLETVHYR              | 2044.3             | 3            | 4.3866 | 0.3214 |
| RATLGPTPTTPPQPPDPSQPPPGPMQH     | 2801.1             | 3            | 5.1907 | 0.3724 |
| RATVVESSEK                      | 1106.2             | 2            | 2.8025 | 0.1825 |
| RAVAGDASESALLK                  | 1388.6             | 2            | 3.3794 | 0.3467 |
| RAVAREESGKPGAHVTVK              | 1893.1             | 3            | 3.3435 | 0.2198 |
| RAVETTAQSDNK                    | 1320.4             | 2            | 3.4155 | 0.1903 |
| RAVGPSSTQLYMVR                  | 1565.8             | 2            | 2.7897 | 0.246  |
| RAVLAVHPDKAAGQPYEQHAK           | 2287.6             | 3            | 3.7986 | 0.2546 |
| RAVLQAAR                        | 885.0              | 2            | 2.7744 | 0.1128 |
| RAVPLALALISVSNPR                | 1678.0             | 2            | 2.6755 | 0.2573 |
| RDAGDKDKEQELSEEDKQLQDELEMLVER   | 3477.7             | 3            | 4.7518 | 0.2728 |
| RDDDPLNAR                       | 1072.1             | 2            | 3.2068 | 0.2421 |
| RDDGLSAAAR                      | 1032.1             | 2            | 2.8411 | 0.1903 |
| RDDGSWEVIEGYR                   | 1582.7             | 2            | 2.9431 | 0.2167 |
| RDDGTGQLLLPLSDAR                | 1727.9             | 2            | 3.8305 | 0.401  |
| RDEAGHFLWPGFGENAR               | 1960.1             | 2            | 3.5262 | 0.307  |
| RDEKDKVGNVEYFGLGNSPGFPLQYYPYGGK | 3718.0             | 3            | 5.8176 | 0.3811 |
| RDEDVSEGSVPNGDSQSGVDSLK         | 2534.6             | 3            | 3.3385 | 0.1138 |
| RDELEEGAPSQAMLR                 | 1702.9             | 2            | 5.036  | 0.3048 |
| RDELLAQHAAGALGLPDLVAVLTR        | 2500.9             | 3            | 3.7169 | 0.1856 |
| RDEQDDDDKGDSEKTR                | 1909.9             | 2            | 4.342  | 0.4888 |
| RDESLKVDEHLAK                   | 1540.7             | 2            | 4.8907 | 0.4275 |

| Peptide Sequence                  | Peptide mass (m/z) | Charge State | Xcorr  | DelCn2 |
|-----------------------------------|--------------------|--------------|--------|--------|
| RDESLKVEHLAKQDAQILYK              | 2500.8             | 3            | 3.3095 | 0.2241 |
| RDFAPPGQK                         | 1144.3             | 2            | 2.8517 | 0.1077 |
| RDFAPPGQKR                        | 1300.5             | 2            | 3.1053 | 0.3349 |
| RDFGSFDKFKEK                      | 1504.7             | 2            | 3.5806 | 0.1806 |
| RDFLYARR                          | 1097.3             | 2            | 2.4893 | 0.101  |
| RDFNHINVELSLLGK                   | 1756.0             | 2            | 2.5199 | 0.1463 |
| RDFPEEVAIVEELGR                   | 1759.9             | 2            | 5.5325 | 0.4512 |
| RDFPEEVAIVEELGRR                  | 1916.1             | 3            | 6.1408 | 0.4167 |
| RDFTPAELR                         | 1105.2             | 2            | 2.6095 | 0.1258 |
| RDGGRLSEADIR                      | 1345.4             | 2            | 2.554  | 0.1308 |
| RDGSYGSGR                         | 955.0              | 2            | 2.4639 | 0.1892 |
| RDHALLEEQSK                       | 1326.4             | 2            | 4.0094 | 0.2687 |
| RDHPLPEVAHVK                      | 1398.6             | 2            | 3.5762 | 0.4043 |
| RDIDNLVQR                         | 1129.3             | 2            | 2.7438 | 0.1161 |
| RDKGLVEK                          | 945.1              | 2            | 2.5923 | 0.11   |
| RDLGEELEALKTELEDTLSTAAQQELR       | 3175.4             | 3            | 7.5261 | 0.5284 |
| RDLGEELEALRGELEDTLSTNAQQELR       | 3202.4             | 3            | 4.087  | 0.33   |
| RDNELIGQTVR                       | 1301.4             | 2            | 3.6571 | 0.3067 |
| RDNYVPEVSALDQEIIIVDPDTK           | 2646.8             | 3            | 4.1036 | 0.2762 |
| RDNYVPEVSALDQEIIIVDPDTKEMLK       | 3148.5             | 3            | 6.637  | 0.4023 |
| RDPAGHSQAGAYK                     | 1358.4             | 2            | 3.4281 | 0.3881 |
| RDPFIGEHTEEILEEFGFSR              | 2409.6             | 3            | 4.8478 | 0.2861 |
| RDPNHSEGSTTLLEGYTSHPHTK           | 2728.9             | 3            | 5.5237 | 0.3501 |
| RDPPAYIEEFLQQYNHYK                | 2312.5             | 3            | 4.5107 | 0.1789 |
| RDQALTEEHAR                       | 1326.4             | 2            | 4.4502 | 0.3586 |
| RDQDNMQAELNR                      | 1490.6             | 2            | 4.1156 | 0.2028 |
| RDSFQEVLR                         | 1150.3             | 2            | 2.8042 | 0.1548 |
| RDSHLTLLNQLLQGLR                  | 1878.2             | 3            | 4.4072 | 0.367  |
| RDTGEKLTVAENEAETKLQAILEDIQVTLFTR  | 3634.0             | 3            | 5.8075 | 0.2649 |
| RDVDFELIKVEGK                     | 1548.8             | 3            | 3.7331 | 0.2572 |
| RDVQEIFR                          | 1063.2             | 2            | 2.8929 | 0.1115 |
| RDYDDMSPR                         | 1155.2             | 2            | 3.0775 | 0.2098 |
| RDYKVDQEIIINIMQDR                 | 2037.3             | 3            | 4.397  | 0.1814 |
| RDYLKEAVTTLK                      | 1437.7             | 2            | 3.2047 | 0.2652 |
| REAEDLQVGQVELGGGPGAGSLQPLALEGSLQ  | 3177.5             | 3            | 5.8996 | 0.4402 |
| REAEDLQVGQVELGGGPGAGSLQPLALEGSLQK | 3305.6             | 3            | 9.0021 | 0.5439 |



| Peptide Sequence                   | Peptide mass (m/z) | Charge State | Xcorr  | DelCn2 |
|------------------------------------|--------------------|--------------|--------|--------|
| REAEDLQVGQVELGGGPGAGSLQPLALEGSLQKR | 3461.8             | 3            | 7.8412 | 0.5509 |
| REAESDCDCLQGFLAHSLLGGGTGSGMGTLLLSK | 3325.7             | 3            | 4.58   | 0.2362 |
| REDEGEPGDEGQLEDEGSQEK              | 2334.3             | 3            | 5.2154 | 0.3434 |
| REDIFYTSK                          | 1159.3             | 2            | 3.0256 | 0.1174 |
| REDIVDTMVFKPSDVMLVHFR              | 2536.0             | 3            | 4.3146 | 0.3769 |
| REDKELYTVVQHVK                     | 1745.0             | 3            | 3.9372 | 0.3584 |
| REDLFIVSK                          | 1107.3             | 2            | 2.4775 | 0.1833 |
| REDLLNNAAHAGK                      | 1409.5             | 3            | 3.5213 | 0.3126 |
| REDLVEEIKRR                        | 1443.6             | 3            | 3.4451 | 0.1728 |
| REDLVVAPAGITLK                     | 1482.8             | 2            | 4.3346 | 0.4375 |
| REDLVVAPAGITLKEANEILQR             | 2436.8             | 3            | 5.524  | 0.4653 |
| REEAAVDAQQK                        | 1373.5             | 2            | 3.9791 | 0.2896 |
| REEDEPEER                          | 1189.2             | 2            | 2.8445 | 0.1457 |
| REEEEDFIR                          | 1223.3             | 2            | 3.2681 | 0.2397 |
| REEEEFNTGPLSVLTQSVK                | 2164.4             | 3            | 4.4031 | 0.4    |
| REEEEVLDQGDFYSLLSK                 | 2158.3             | 2            | 5.753  | 0.4555 |
| REEFVQWVELLPDTQTPSWLGLPNNAER       | 3326.7             | 3            | 5.1281 | 0.2871 |
| REEGAPGDPEAALEDNLR                 | 2011.1             | 2            | 3.5226 | 0.2899 |
| REELITNWEQIR                       | 1587.8             | 2            | 4.7063 | 0.2811 |
| REELSNVLAAMR                       | 1389.6             | 2            | 3.7715 | 0.2847 |
| REESEAVEAGDPPEELR                  | 1914.0             | 2            | 3.0572 | 0.2453 |
| REGGDGEEQDVG DAGR                  | 1647.6             | 2            | 3.9114 | 0.3913 |
| REHVKR                             | 825.0              | 1            | 2.014  | 0.1142 |
| REKAAGEKVYWTCT                     | 1697.9             | 2            | 2.4611 | 0.1366 |
| REKAEGDVAALNR                      | 1429.6             | 2            | 3.7734 | 0.3845 |
| REKAEGDVAALNRR                     | 1585.8             | 2            | 2.7407 | 0.1309 |
| REKDEKEKAQEKQR                     | 1674.8             | 2            | 3.6514 | 0.1589 |
| REKEAEER                           | 1047.1             | 2            | 2.7297 | 0.1269 |
| RELDES LQVAER                      | 1445.6             | 2            | 3.9741 | 0.2947 |
| RELDKAESEIKK                       | 1446.6             | 2            | 3.3244 | 0.2927 |
| RELHGQNPVVTPCNK                    | 1692.9             | 2            | 3.5593 | 0.315  |
| RELLELASR                          | 1087.3             | 2            | 2.9437 | 0.1113 |
| RELVALCRSGRAAALR                   | 1743.1             | 2            | 2.6825 | 0.1016 |
| RENISHNTQDILIPNVLLS QEK            | 2562.9             | 3            | 4.5014 | 0.2524 |
| RENLSDEDKLNNAK                     | 1646.7             | 2            | 4.3669 | 0.2975 |
| RENPLDSSVEFMQIWR                   | 2008.2             | 2            | 4.5024 | 0.3103 |

| Peptide Sequence                  | Peptide mass (m/z) | Charge State | Xcorr  | DelCn2 |
|-----------------------------------|--------------------|--------------|--------|--------|
| REPEEHQVEEEHRK                    | 1832.9             | 2            | 3.9934 | 0.2226 |
| REPHPAEAEK                        | 1164.3             | 2            | 2.842  | 0.2558 |
| REPIPSLEAIYLLSPTEK                | 2057.4             | 2            | 4.2581 | 0.3795 |
| REPLPSLEAVYLITPSEK                | 2043.3             | 2            | 3.9115 | 0.3646 |
| REPLSLINVR                        | 1197.4             | 2            | 2.433  | 0.113  |
| REPSSDVHSR                        | 1170.2             | 2            | 2.456  | 0.1903 |
| REPWLLPSQHNDIIR                   | 1875.1             | 2            | 4.109  | 0.2389 |
| REVKKEEGEAFAR                     | 1549.7             | 2            | 4.0345 | 0.3387 |
| RFDAMPFTLR                        | 1254.5             | 2            | 2.8937 | 0.1406 |
| RFDDAVVQSDMK                      | 1411.6             | 2            | 3.7624 | 0.3445 |
| RFDDAVVQSDMKHWPFMVNDAGRPK         | 3047.5             | 3            | 5.3529 | 0.492  |
| RFDDPGLMLMGFKPLVLLK               | 2191.7             | 3            | 4.875  | 0.3884 |
| RFDEAALSIQKEK                     | 1535.7             | 2            | 3.776  | 0.1261 |
| RFDEILEASDGIMVAR                  | 1823.1             | 2            | 5.4166 | 0.4619 |
| RFDGVDVSEVLFGR                    | 1596.8             | 2            | 2.5122 | 0.2202 |
| FDGYLNQGANNKK                     | 1625.8             | 2            | 4.4618 | 0.298  |
| RFDIYR                            | 870.0              | 2            | 2.6297 | 0.1013 |
| RFDSLSQAHEEAQR                    | 1803.9             | 3            | 4.2763 | 0.3533 |
| RFDSLSQAHEEAQREK                  | 2061.2             | 3            | 3.9307 | 0.3055 |
| RFDVSGYPTLK                       | 1283.5             | 2            | 3.7276 | 0.3671 |
| RFEAEPLPENTNR                     | 1573.7             | 2            | 3.9844 | 0.3027 |
| RFEEALQTIFNR                      | 1524.7             | 2            | 4.0392 | 0.3149 |
| RFEEELAAR                         | 1121.2             | 2            | 3.1001 | 0.1762 |
| RFEELTNLIR                        | 1291.5             | 2            | 2.8674 | 0.1758 |
| RFEKPLEEK                         | 1176.3             | 2            | 2.484  | 0.1202 |
| RFEQAQHMFR                        | 1350.5             | 2            | 2.7509 | 0.254  |
| RFESIPDMLELDHDTVSGDVTFGK          | 2708.0             | 3            | 5.239  | 0.4376 |
| RFPPYVYVNIIGGLDEEGKGAVYSFDPVGSYQR | 3809.2             | 3            | 4.1335 | 0.1758 |
| RFGLVLTTEHVAAAELGAR               | 1899.1             | 3            | 3.9118 | 0.3378 |
| RFVPIIADGGIQTVGHVVK               | 2064.4             | 2            | 2.7511 | 0.2392 |
| RFVPIIADGGIQNVGHIK                | 2049.4             | 2            | 6.3128 | 0.4752 |
| RFIPTSIFVKPQGR                    | 1647.0             | 3            | 4.2637 | 0.3164 |
| RFKDPGLVDQLVK                     | 1515.8             | 2            | 3.3576 | 0.1218 |
| RFKGTESISK                        | 1153.3             | 2            | 2.6618 | 0.123  |
| RFKIPGSPPEMGR                     | 1559.8             | 2            | 3.1489 | 0.2135 |
| RFNDGSDEKKK                       | 1324.4             | 2            | 2.8977 | 0.1115 |

| Peptide Sequence                | Peptide mass (m/z) | Charge State | Xcorr  | DelCn2 |
|---------------------------------|--------------------|--------------|--------|--------|
| RFPEEPHVPLEQR                   | 1634.8             | 2            | 2.862  | 0.1254 |
| RFPELESLVPNALDYIR               | 2033.3             | 2            | 3.248  | 0.2075 |
| RFPGYDSESK                      | 1186.3             | 2            | 2.7119 | 0.1008 |
| RFPGYDSESKEFNAEVHR              | 2169.3             | 3            | 4.149  | 0.3207 |
| RFPGYDSESKEFNAEVHRK             | 2297.5             | 3            | 4.7855 | 0.3183 |
| RFPHGIPFLADYVHSLGLK             | 2168.5             | 3            | 6.2441 | 0.4767 |
| RFPLLINQPHK                     | 1363.6             | 3            | 3.3975 | 0.2214 |
| RFPVAPLIPYPLITK                 | 1726.1             | 2            | 3.6736 | 0.2567 |
| RFPVAPLIPYPLITKEDINAIEEMEEDKR   | 3299.8             | 3            | 5.5518 | 0.2832 |
| RFPVGPPKND DTPNR                | 1710.9             | 3            | 4.0339 | 0.2858 |
| RFQGVSLPVHLR                    | 1409.7             | 3            | 4.0143 | 0.263  |
| RFQLLEGPPESMGR                  | 1617.9             | 2            | 3.4279 | 0.2267 |
| RFQSVPAQPGQTSP LLQYFGILLDQGQLNK | 3345.8             | 3            | 4.7669 | 0.4081 |
| RFSDFLGLYEK                     | 1375.6             | 2            | 2.7543 | 0.1937 |
| RFSEGTSADR                      | 1126.2             | 2            | 3.1566 | 0.2457 |
| RFSEGLVLSQSPSQDQEK              | 1836.0             | 2            | 3.0411 | 0.2784 |
| RFSFSGNTLVSSADPEGHFETPIWIER     | 3168.4             | 3            | 5.0518 | 0.4419 |
| RFSMVVQDGIVK                    | 1379.7             | 2            | 3.2149 | 0.2718 |
| RFSTEYELQQLEQFKK                | 2075.3             | 3            | 5.123  | 0.3608 |
| RFSTEYELQQLEQFKKDNEETGFGSGTR    | 3326.5             | 3            | 7.5999 | 0.4374 |
| RFTAQGLPDLNHSQVYAVK             | 2145.4             | 3            | 4.5466 | 0.289  |
| RFVEQVAR                        | 1005.2             | 2            | 3.0541 | 0.2197 |
| RFVNVVPTFGK                     | 1264.5             | 2            | 3.5237 | 0.2787 |
| RFVNVVPTFGKK                    | 1392.7             | 2            | 3.5071 | 0.223  |
| RFYEQMNGPVAGASR                 | 1683.9             | 2            | 5.4419 | 0.4393 |
| RGAAASPEPAR                     | 1083.2             | 2            | 2.6014 | 0.1552 |
| RGAEGLAPQPPPPQQHQERPGAAAIGSAR   | 3059.4             | 3            | 4.9747 | 0.4764 |
| RGAGMPGQHGQITQQELDTVVK          | 2351.6             | 3            | 4.4453 | 0.2462 |
| RGAPAAATAPAPTAHK                | 1488.7             | 2            | 3.3859 | 0.3395 |
| RGAPPSSNIEDFHGLLPK              | 1936.2             | 3            | 4.4859 | 0.2295 |
| RGDALIEMESEQDVQKALEK            | 2290.5             | 3            | 4.9417 | 0.2706 |
| RGDDFKKEGK                      | 1180.3             | 2            | 2.4817 | 0.18   |
| RGDDSGDK                        | 997.0              | 2            | 2.4698 | 0.1799 |
| RGDDSGDKYR                      | 1316.4             | 2            | 3.3018 | 0.2922 |
| RGDESQFLLQAPGSTELEELTVQVAR      | 2875.1             | 3            | 3.6423 | 0.1464 |
| RGDDFFYHSENPKYPEVGD LR          | 2427.6             | 3            | 4.0245 | 0.3118 |

| Peptide Sequence                 | Peptide mass (m/z) | Charge State | Xcorr  | DelCn2 |
|----------------------------------|--------------------|--------------|--------|--------|
| RGDFIHVMDNSDPNWWK                | 2118.3             | 2            | 2.4328 | 0.1694 |
| RGDIIGVQGNPGK                    | 1311.5             | 2            | 3.7083 | 0.3289 |
| RGDLHVTLSAAGTSTVLLAER            | 2269.5             | 3            | 3.7575 | 0.2039 |
| RGDLPFVVPR                       | 1156.4             | 2            | 3.9641 | 0.2362 |
| RGDPHELRL                        | 980.1              | 2            | 2.5657 | 0.1034 |
| RGDQLLSVNGVSVVEGEHHEK            | 2191.3             | 3            | 4.0391 | 0.326  |
| RGDTYELQVR                       | 1237.3             | 2            | 3.6692 | 0.3164 |
| RGDVTFLEDVLNEIQLR                | 2018.3             | 2            | 3.8105 | 0.2399 |
| RGEAHLAVNDFELAR                  | 1698.9             | 3            | 4.9567 | 0.4854 |
| RGEAPFAQR                        | 1032.1             | 2            | 3.087  | 0.1848 |
| RGEAQLLMNEFESAK                  | 1723.9             | 2            | 4.1838 | 0.3991 |
| RGEAQLLMNEFESAKGDFEK             | 2300.5             | 3            | 4.298  | 0.296  |
| RGEDLFMCMDIQLVEALCGFQKPISTLDNR   | 3445.0             | 3            | 3.3137 | 0.1604 |
| RGEEGHDPKEPEQLR                  | 1777.9             | 2            | 4.2999 | 0.3686 |
| RGEEGHDPKEPEQLRK                 | 1906.0             | 2            | 3.5896 | 0.2322 |
| RGEPHVTR                         | 952.1              | 2            | 3.1288 | 0.3137 |
| RGEQADHFTQTPLDPSQVLVR            | 2452.7             | 3            | 4.5077 | 0.2742 |
| RGEQLTLPPPPQLGYSITAEDLDLEKK      | 3010.4             | 3            | 4.7673 | 0.2852 |
| RGERPDYKGEELR                    | 1734.9             | 2            | 4.6068 | 0.3143 |
| RGESLDNLDSPR                     | 1359.4             | 2            | 2.6144 | 0.1993 |
| RGETESEEFEK                      | 1341.4             | 2            | 2.9016 | 0.1191 |
| RGFAFVTFDDHDSVDKIVIQK            | 2438.7             | 3            | 5.6742 | 0.3221 |
| RGFAFVTFDDHDTVDKIVVQK            | 2438.7             | 3            | 3.7562 | 0.2136 |
| RGFCFITFKEEPPVKK                 | 1959.3             | 3            | 3.6535 | 0.2163 |
| RGFCFITYTDEEPPVKK                | 1934.2             | 3            | 5.0553 | 0.3207 |
| RGFGFVTFDDHDPVVK                 | 1853.0             | 3            | 3.9693 | 0.2562 |
| RGFGFVTFDDHDPVDKIVLQK            | 2434.7             | 2            | 4.8024 | 0.3882 |
| RGFGFVYFQNHDAADKAAVVK            | 2341.6             | 3            | 3.9799 | 0.2098 |
| RGFIPNIR                         | 973.2              | 2            | 2.8911 | 0.1093 |
| RGFPGYMYTDLATYER                 | 2054.3             | 2            | 2.7957 | 0.1682 |
| RGFSEEQLR                        | 1122.2             | 2            | 3.3006 | 0.2262 |
| RGFVFITFKEEPPVKK                 | 1955.3             | 3            | 3.6324 | 0.2865 |
| RGFVLQDTVEQLR                    | 1561.8             | 2            | 2.5568 | 0.1815 |
| RGGDGQINEQVEK                    | 1430.5             | 2            | 2.8971 | 0.1175 |
| RGGDGYDGGYGGFDDYGGYNNYGYGNDGFDDR | 3437.3             | 3            | 5.2786 | 0.4448 |
| RGGEERVGEEDDEAAEAEEAEEAER        | 2848.8             | 3            | 6.0016 | 0.4024 |

| Peptide Sequence                   | Peptide mass (m/z) | Charge State | Xcorr  | DelCn2 |
|------------------------------------|--------------------|--------------|--------|--------|
| RGGETDEFSNVR                       | 1367.4             | 2            | 2.6268 | 0.2615 |
| RGGGGTELGPAPRPR                    | 1672.9             | 3            | 3.5217 | 0.3622 |
| RGGGLRLPLLPESGPLR                  | 1983.3             | 3            | 3.3195 | 0.2319 |
| RGGPISFSSSR                        | 1151.3             | 2            | 3.127  | 0.2082 |
| RGGPNYQEGLR                        | 1247.3             | 2            | 3.4349 | 0.3245 |
| RGGPPGPPISR                        | 1091.2             | 2            | 2.8252 | 0.1763 |
| RGGTWFAGFGR                        | 1212.3             | 2            | 3.6378 | 0.3736 |
| RGHAVPPTLVPLMNGSATPLPTALGLGGR      | 2852.4             | 3            | 6.1195 | 0.3777 |
| RGHDDLGDHYLDCGDLNALK               | 2315.5             | 3            | 3.3956 | 0.1961 |
| RGHDDLGDHYLDCGDLNALKCYSR           | 2825.0             | 3            | 3.2437 | 0.1616 |
| RGHLFLQTDQPIYNPGQR                 | 2141.4             | 3            | 4.3991 | 0.2424 |
| RGHPEAGQ                           | 851.9              | 2            | 2.4236 | 0.1381 |
| RGHREEEQEDLTK                      | 1627.7             | 2            | 2.6216 | 0.2155 |
| RGHREEEQEDLTKDMDEPSPVNVVEEVTLPK    | 3605.9             | 3            | 3.5134 | 0.1343 |
| RGHVECVNSLIAYGGNIDHK               | 2183.4             | 3            | 4.0487 | 0.257  |
| RGHVFEESQVAGTPMFVVK                | 2119.4             | 2            | 4.5647 | 0.4393 |
| RGIEKPPFELPDFIK                    | 1787.1             | 2            | 3.2811 | 0.2022 |
| RGIEKPPFELPDFIKR                   | 1943.3             | 3            | 5.217  | 0.4027 |
| RGIGGIFDDLSPSKEEVFR                | 2385.6             | 3            | 3.3662 | 0.1742 |
| RGIHSAIDASQTPDVVFASILAAFSK         | 2703.0             | 3            | 6.6469 | 0.5101 |
| RGILTLKYPIEHGIITNWDDMEK            | 2744.2             | 3            | 3.5431 | 0.1086 |
| RGILTLKYPIEHGIITNWDDMEKIWHHTFYNELR | 4241.8             | 3            | 4.7389 | 0.3909 |
| RGIQFLQEQGMLGTSVEDIAQFLHQEER       | 3261.6             | 3            | 5.8167 | 0.4424 |
| RGLGAGAGAGEESPATSLPR               | 1855.0             | 2            | 7.0395 | 0.4772 |
| RGLPQLGTLGAGNHYAEIQVVDEIFNEYAAK    | 3375.7             | 3            | 4.7136 | 0.373  |
| RGLQATQLAR                         | 1114.3             | 2            | 3.0104 | 0.1695 |
| RGLQQITGHGGLR                      | 1393.6             | 3            | 3.3931 | 0.3237 |
| RGLSAQEKAELDQLLSGFGLEDPGSSLK       | 2947.2             | 3            | 4.6984 | 0.3357 |
| RGPAAESSWR                         | 1262.3             | 2            | 2.9364 | 0.2493 |
| RGPCIYNEDNGIIK                     | 1706.0             | 2            | 3.6596 | 0.1951 |
| RGPFELEAFYSDPQGVPEAK               | 2498.7             | 2            | 4.4267 | 0.2957 |
| RGPLAGLPGSTPR                      | 1336.5             | 2            | 3.0251 | 0.3389 |
| RGPPSDGHEALEKEVQALR                | 2090.3             | 3            | 4.7601 | 0.1618 |
| RGQAALDR                           | 887.0              | 2            | 2.6988 | 0.222  |
| RGQTCVVHYTGMLDGGK                  | 2023.3             | 2            | 4.7178 | 0.3785 |
| RGSPLLIGVR                         | 1068.3             | 2            | 3.3102 | 0.2558 |

| Peptide Sequence                           | Peptide mass (m/z) | Charge State | Xcorr  | DelCn2 |
|--------------------------------------------|--------------------|--------------|--------|--------|
| RGTEHSGSTVPSILNR                           | 1711.9             | 2            | 4.5993 | 0.4399 |
| RGTELGGAAGQGGHPPGYTSLASR                   | 2298.5             | 3            | 3.446  | 0.11   |
| RGTGGVDTAATGGVFDISNLDR                     | 2180.3             | 2            | 4.7002 | 0.4011 |
| RGTGGVDTAAVGGVFDVSNADR                     | 2122.2             | 2            | 3.2374 | 0.3259 |
| RGTHTTVSQVQPPPSK                           | 1720.9             | 3            | 3.6623 | 0.4405 |
| RGVAEAAEER                                 | 1088.2             | 2            | 2.8103 | 0.1419 |
| RGVFNQMEPK                                 | 1305.5             | 2            | 2.5744 | 0.1305 |
| RGVHKEGSLGDELLPLGYSEPEQQEGASAGAPSPITLLEASR | 4235.6             | 3            | 6.1992 | 0.4221 |
| RGVMLAVDAVIAELKK                           | 1714.1             | 3            | 6.151  | 0.2118 |
| RGWDENVYYTVPLVR                            | 1868.1             | 2            | 2.6349 | 0.1048 |
| RHADGSFSDEMNTILDNLAAR                      | 2334.5             | 3            | 5.6725 | 0.4347 |
| RHADGSFSDEMNTILDNLAARDFINWLIQTK            | 3594.0             | 3            | 5.7347 | 0.4498 |
| RHAEQERDELADEITNSASGK                      | 2357.4             | 3            | 5.1882 | 0.322  |
| RHDAETNITTEK                               | 1415.5             | 2            | 3.1077 | 0.27   |
| RHDEFER                                    | 989.0              | 2            | 3.006  | 0.3048 |
| RHDEFERHAEGTFTSDVSSYLEGQAAK                | 3069.2             | 3            | 3.2833 | 0.2366 |
| RHDEGNLGLSLQLEVR                           | 1723.9             | 2            | 2.5959 | 0.1763 |
| RHEAAVPLAIPSARPEK                          | 1940.2             | 3            | 4.3792 | 0.2487 |
| RHEAFEK                                    | 917.0              | 2            | 2.6013 | 0.1327 |
| RHEAFESDLAAHQDR                            | 1782.9             | 3            | 3.8549 | 0.2938 |
| RHEGFAAALGDGKEPEGIFSR                      | 2245.4             | 3            | 3.4635 | 0.2811 |
| RHEILQWVLQTDSSQ                            | 1882.1             | 3            | 4.6776 | 0.3638 |
| RHEMPPHIYAITDTAYR                          | 2072.3             | 2            | 4.7871 | 0.4378 |
| RHEQFIPIAADK                               | 1425.6             | 2            | 2.8179 | 0.1831 |
| RHEVPPHYAVTEGAYR                           | 1982.2             | 3            | 5.0792 | 0.4078 |
| RHGAEVIDTPVFELK                            | 1711.9             | 2            | 2.9531 | 0.2405 |
| RHILGSIVQSEGSYVESLKR                       | 2259.6             | 3            | 6.5997 | 0.4339 |
| RHPDLSIPELLR                               | 1446.7             | 2            | 3.5042 | 0.3569 |
| RHPDYSVLLLLR                               | 1468.7             | 3            | 4.9003 | 0.4484 |
| RHPYFYAPELFFAK                             | 1900.2             | 3            | 5.512  | 0.4698 |
| RHPYFYAPELFFAKR                            | 2056.4             | 3            | 4.3676 | 0.2443 |
| RHQYSDYDYHSSSEK                            | 1902.9             | 2            | 4.8106 | 0.341  |
| RHSQGTFTSDYSK                              | 1514.6             | 2            | 3.8903 | 0.3416 |
| RHVFGESDELIGQK                             | 1615.8             | 3            | 5.7386 | 0.3868 |
| RIALTDNALIAR                               | 1327.6             | 2            | 3.4125 | 0.1934 |
| RIDEINKELNQVMEQLGDAR                       | 2372.6             | 3            | 4.9492 | 0.4139 |

| Peptide Sequence                     | Peptide mass (m/z) | Charge State | Xcorr  | DelCn2 |
|--------------------------------------|--------------------|--------------|--------|--------|
| RIDITLSSVK                           | 1132.3             | 2            | 2.8765 | 0.2368 |
| RIDTNLNKVS                           | 1288.5             | 2            | 2.6106 | 0.1008 |
| RIEDIHLLVER                          | 1393.6             | 2            | 3.5676 | 0.2593 |
| RIEELNKTANGNVEAK                     | 1787.0             | 2            | 3.0241 | 0.2128 |
| RIEELQHNLQK                          | 1408.6             | 2            | 3.5496 | 0.2311 |
| RIEEMEDELQKTER                       | 1807.0             | 3            | 3.7545 | 0.1067 |
| RIEESAIDEVVVTNTIPHEVQK               | 2507.8             | 3            | 6.0263 | 0.4472 |
| RIEGLIER                             | 986.2              | 2            | 2.458  | 0.1162 |
| RIEPADAHVLQK                         | 1377.6             | 2            | 3.0775 | 0.1251 |
| RIEQHYFEDR                           | 1393.5             | 2            | 3.0208 | 0.3114 |
| RIESLIDRDYMER                        | 1696.9             | 2            | 3.2376 | 0.2595 |
| RIEYIEAR                             | 1050.2             | 2            | 2.9644 | 0.2029 |
| RIFDANTKPNLNLQVLSNPEFLAEGTAIK        | 3215.6             | 3            | 5.7977 | 0.4411 |
| RIFDANTKPNLNLQVLSNPEFLAEGTAIKDLK     | 3572.1             | 3            | 5.6261 | 0.5082 |
| RIFHTVTTTDDPVIRK                     | 1900.2             | 3            | 4.6701 | 0.2918 |
| RIGFDVVTLSGTR                        | 1421.6             | 2            | 2.7382 | 0.2688 |
| RIGIFGQDEDVTSK                       | 1565.7             | 2            | 4.413  | 0.2775 |
| RIGKENFIEK                           | 1234.4             | 2            | 2.5137 | 0.1482 |
| RIHLELR                              | 937.1              | 2            | 2.5247 | 0.1217 |
| RIHNGESMSYLFR                        | 1610.8             | 2            | 3.1846 | 0.3231 |
| RIIKETQR                             | 1044.2             | 2            | 2.6745 | 0.115  |
| RIIVPHNVSK                           | 1163.4             | 2            | 2.5357 | 0.1271 |
| RIKEDEDDKTVLDLAVVLFETATLR            | 2891.3             | 3            | 5.3485 | 0.4448 |
| RILELDQFKGQQGQKR                     | 1945.2             | 2            | 3.5138 | 0.3402 |
| RILGLLDAYLK                          | 1275.6             | 2            | 2.7702 | 0.193  |
| RILISLATGHR                          | 1237.5             | 2            | 3.4711 | 0.3439 |
| RILISLATGHREEGGENLDQAR               | 2436.7             | 3            | 3.581  | 0.272  |
| RILNEDGSPNLDFKPEDQPHFDIKDEF          | 3217.4             | 3            | 5.2369 | 0.4538 |
| RILSKPIEVQVGGR                       | 1552.8             | 2            | 3.7225 | 0.3403 |
| RILVATNLFGR                          | 1260.5             | 2            | 3.7848 | 0.4054 |
| RIPADTFAALKNPNAMLVNLEEPLASTYQDILYQAK | 4021.6             | 3            | 6.6571 | 0.4931 |
| RIPIEDGSGEVVLSRK                     | 1756.0             | 3            | 3.8138 | 0.2908 |
| RIPIHNEDITYDELVLMMQR                 | 2487.9             | 2            | 4.15   | 0.443  |
| RIPIPELEAR                           | 1194.4             | 2            | 2.9754 | 0.2381 |
| RIPLAEWESR                           | 1257.4             | 2            | 2.6382 | 0.2531 |
| RIPQSTLSEFYPR                        | 1594.8             | 2            | 2.7056 | 0.2012 |

| Peptide Sequence               | Peptide mass (m/z) | Charge State | Xcorr  | DelCn2 |
|--------------------------------|--------------------|--------------|--------|--------|
| RIPYAPSGEIPK                   | 1328.5             | 2            | 3.3947 | 0.2516 |
| RIQDLIPVLLR                    | 1336.7             | 2            | 3.4609 | 0.2743 |
| RIQEEMEKER                     | 1348.5             | 2            | 2.5554 | 0.1178 |
| RIQEIIQLDVTTSEYEK              | 2195.4             | 2            | 5.0918 | 0.407  |
| RIQEIIQLDVTTSEYEKEK            | 2452.7             | 3            | 6.6494 | 0.4156 |
| RIQEIIQLDVTTSEYEKEKLNER        | 2965.3             | 3            | 5.6682 | 0.2924 |
| RIQEVGEPKSEEEK                 | 1529.7             | 3            | 3.3477 | 0.1639 |
| RIQLQPTSIEKEVFPIMAK            | 2229.7             | 3            | 3.9958 | 0.2035 |
| RIQLVEEELDR                    | 1400.6             | 3            | 3.5533 | 0.3136 |
| RIQLVEEELDRAQER                | 1885.1             | 2            | 3.8824 | 0.3333 |
| RIQQLTEEIGR                    | 1343.5             | 2            | 3.1437 | 0.2273 |
| RIQSGLGALSR                    | 1158.3             | 2            | 2.9657 | 0.2807 |
| RIQTYLQSTKPIIDLYEEMGK          | 2527.9             | 3            | 4.8118 | 0.4153 |
| RISASCQHPTAFEEAIPK             | 1986.2             | 2            | 3.1959 | 0.1599 |
| RISAVSLANR                     | 1087.3             | 2            | 3.4856 | 0.1762 |
| RISAVSVAER                     | 1088.2             | 2            | 3.3963 | 0.2707 |
| RISEQFTAMFR                    | 1386.6             | 2            | 3.4028 | 0.3809 |
| RISGLIYEETR                    | 1337.5             | 2            | 3.6412 | 0.3111 |
| RISINQALQHAFIQEK               | 1897.2             | 2            | 2.5928 | 0.2147 |
| RISQTYQQQYGR                   | 1528.7             | 2            | 4.4408 | 0.4299 |
| RITEAEKNER                     | 1246.4             | 2            | 3.5817 | 0.2249 |
| RITKLDQILLNGNNITMLVPGGEGPEV    | 2893.4             | 3            | 4.9753 | 0.3503 |
| RITYYR                         | 872.0              | 2            | 2.5435 | 0.1629 |
| RIVAVTGAEAQK                   | 1243.4             | 2            | 3.4219 | 0.2015 |
| RIVDDWANDGWGLKK                | 1774.0             | 3            | 4.8265 | 0.3453 |
| RIVDGKVVSETNDTK                | 1661.8             | 2            | 3.7889 | 0.4116 |
| RIVISAPSADAPMFVMGVNHFK         | 2388.8             | 3            | 4.1869 | 0.1833 |
| RIVQNSNGYK                     | 1179.3             | 2            | 2.9876 | 0.2452 |
| RIVSQLLTLMDGLK                 | 1588.0             | 2            | 4.4897 | 0.3829 |
| RIYIPLPEEAAR                   | 1428.7             | 2            | 2.8787 | 0.3316 |
| RKADGYNQPD SK                  | 1379.5             | 2            | 3.3447 | 0.2064 |
| RKADLNTITESSAALQNLI EGSEPILEER | 3199.5             | 3            | 4.0751 | 0.1492 |
| RKAEGEPGDEGQLEDKGSQEK          | 2288.4             | 3            | 4.5845 | 0.2802 |
| RKATGPPVSELITK                 | 1497.8             | 2            | 3.272  | 0.2338 |
| RKAVDEAADALLK                  | 1400.6             | 3            | 3.3587 | 0.2343 |
| RKAVDEAADALLKAKEELEK           | 2228.5             | 3            | 3.6805 | 0.107  |



| Peptide Sequence                  | Peptide mass (m/z) | Charge State | Xcorr  | DelCn2 |
|-----------------------------------|--------------------|--------------|--------|--------|
| RKDEISVDSLDFNKK                   | 1795.0             | 3            | 4.5225 | 0.3808 |
| RKDGLALGPGPFVTALEYATDTK           | 2421.7             | 3            | 3.5858 | 0.2772 |
| RKDLNSDMDSILASLK                  | 1807.1             | 3            | 3.6612 | 0.1312 |
| RKDPEGTPYINHPIGVAR                | 2021.3             | 2            | 4.0531 | 0.4021 |
| RKDPELWGSVLLESNPYR                | 2160.4             | 3            | 5.1332 | 0.3116 |
| RKDSAIQQQVANLQMK                  | 1859.1             | 2            | 4.9608 | 0.4278 |
| RKEAEGTEEGGEEEDDEEMDPQTIDSLIELSTK | 3711.8             | 3            | 6.7334 | 0.505  |
| RKEDEVVEEWQHR                     | 1641.7             | 2            | 4.4159 | 0.3217 |
| RKEEAFR                           | 936.1              | 2            | 2.5101 | 0.1138 |
| RKEEESKFEEMK                      | 1570.7             | 2            | 4.3015 | 0.3196 |
| RKEEESKFEEMKK                     | 1698.9             | 2            | 4.4524 | 0.2956 |
| RKEEIEAQIK                        | 1244.4             | 2            | 2.9715 | 0.1115 |
| RKEELAQSQAQEQEFVQK                | 2314.5             | 3            | 3.7519 | 0.3241 |
| RKEFLSELQR                        | 1306.5             | 3            | 3.4611 | 0.1863 |
| RKEGGEGYVPTSYLK                   | 1712.9             | 2            | 3.7355 | 0.2303 |
| RKEIDLLLGQTDDTR                   | 1774.0             | 2            | 3.8605 | 0.3194 |
| RKELEQVCNPIISGLYQGAGGPGGGFGAQQPK  | 3284.7             | 3            | 6.721  | 0.3928 |
| RKEMMGRNPKLGAAPNP                 | 1868.2             | 2            | 2.4436 | 0.1143 |
| RKENPIEDDLIFR                     | 1645.8             | 2            | 3.7612 | 0.3383 |
| RKEQEHMINWVEK                     | 1728.0             | 2            | 4.9417 | 0.3399 |
| RKESTDEILGR                       | 1304.4             | 2            | 2.798  | 0.2152 |
| RKETDKNISEAFEDLSK                 | 2011.2             | 3            | 3.7369 | 0.2876 |
| RKEVDMMKEALEK                     | 1607.9             | 3            | 3.6829 | 0.2467 |
| RKEVTDEIVK                        | 1217.4             | 3            | 3.446  | 0.1484 |
| RKEVTDEIVKEFMTPR                  | 1979.3             | 2            | 4.5066 | 0.363  |
| RKEVVVYLDDNQKPPVGEGLNR            | 2526.8             | 3            | 5.2374 | 0.3446 |
| RKGDEV DGVDEVAK                   | 1517.6             | 2            | 4.0936 | 0.3366 |
| RKGDLDKAIELFQR                    | 1689.9             | 2            | 2.9035 | 0.1516 |
| RKGEEVTPISAIR                     | 1456.7             | 2            | 3.8111 | 0.2476 |
| RKGFNEGLWEIENNPVK                 | 2088.3             | 3            | 3.9947 | 0.1567 |
| RKGGEADNLDEFLKEFENPEVPREDQQQQHQQR | 3997.2             | 3            | 3.561  | 0.1733 |
| RKGKEDEGEEAASPMLQIQR              | 2273.5             | 3            | 5.4022 | 0.3613 |
| RKGLSEDVSISK                      | 1319.5             | 2            | 2.969  | 0.2351 |
| RKGTDVNVFNTILTTR                  | 1836.1             | 3            | 4.5617 | 0.4617 |
| RKHEDDEPVFEQIENTANPSR             | 2512.6             | 3            | 3.2252 | 0.235  |
| RKIQUALQQQADEAEDR                 | 1900.0             | 2            | 4.3019 | 0.431  |

| Peptide Sequence                          | Peptide mass (m/z) | Charge State | Xcorr  | DelCn2 |
|-------------------------------------------|--------------------|--------------|--------|--------|
| RKIQALQQQADEAEDRAQGLQR                    | 2553.8             | 3            | 4.1934 | 0.1943 |
| RKLDGETTDLQDQIAELQAQIDELKLQLAK            | 3425.8             | 3            | 4.8325 | 0.3446 |
| RKLDGETTDLQDQIAELQAQIDELKLQLAKKEEELQGALAR | 4651.2             | 3            | 3.8732 | 0.2905 |
| RKLDLFANVVHVK                             | 1539.8             | 3            | 3.6887 | 0.2157 |
| RKLEDSTR                                  | 1005.1             | 2            | 3.0735 | 0.2038 |
| RKLEGDSTDLSDQIAELQAQIAELK                 | 2773.0             | 3            | 6.1056 | 0.3978 |
| RKLESTESR                                 | 1106.2             | 2            | 2.8827 | 0.1458 |
| RKNPAAYENDK                               | 1306.4             | 2            | 3.2194 | 0.3045 |
| RKNQDEESQEAPPELLKRPK                      | 2296.5             | 3            | 5.2562 | 0.2732 |
| RKPADLQNLAPGTHPPFITFNSEVK                 | 2779.1             | 3            | 4.4816 | 0.3084 |
| RKPAPAQLNYLLTDEQIMEDLR                    | 2616.0             | 3            | 4.1187 | 0.2412 |
| RKPDTIEVQQMK                              | 1473.7             | 3            | 4.3224 | 0.2968 |
| RKPDYEPVENTDEAQKK                         | 2048.2             | 2            | 4.6619 | 0.3719 |
| RKPIAGGGGFSDK                             | 1290.5             | 2            | 2.8137 | 0.1359 |
| RKPIAGGGGFSDKLEDIVGGGEYKPK                | 2907.2             | 3            | 6.336  | 0.1191 |
| RKPQPDPLQIPHLSLPPVPPR                     | 2383.8             | 3            | 3.3921 | 0.2247 |
| RKPVEGYDISFLITNFHTEQMYK                   | 2818.2             | 3            | 4.0084 | 0.2392 |
| RKPVLPALTINPTIAEGPSPTSEGASEANLVDLQK       | 3616.1             | 3            | 8.3315 | 0.4823 |
| RKQEELQQLEQQR                             | 1713.9             | 2            | 5.2132 | 0.1992 |
| RKQELAETLANLER                            | 1671.9             | 2            | 4.6872 | 0.3127 |
| RKQNDVFGAEQ                               | 1421.5             | 2            | 2.8709 | 0.187  |
| RKQQTLEAEEAK                              | 1431.6             | 2            | 2.8182 | 0.1517 |
| RKQYPISLVLAPTR                            | 1643.0             | 2            | 3.6502 | 0.3204 |
| RKRKDIEKCLKIDR                            | 1827.2             | 2            | 3.1778 | 0.1002 |
| RKRMTDPTR                                 | 1161.4             | 2            | 2.7732 | 0.1168 |
| RKSDLETSEPKPFLYYPEIK                      | 2441.8             | 3            | 4.042  | 0.322  |
| RKSEPAVGPPR                               | 1194.4             | 2            | 2.7643 | 0.2262 |
| RKSPENTEGK                                | 1146.2             | 2            | 3.0313 | 0.2277 |
| RKTDFFIGGEEGMAEK                          | 1816.0             | 3            | 3.5837 | 0.241  |
| RKTGEAYVQFEPEMANQALLK                     | 2553.9             | 3            | 4.0506 | 0.1585 |
| RKTPEASAIGLHQDPELGDAALR                   | 2446.7             | 3            | 3.6422 | 0.184  |
| RKTPEELLR                                 | 1142.3             | 2            | 2.9067 | 0.1648 |
| RKTVTAMDVVYALK                            | 1595.9             | 3            | 3.7568 | 0.251  |
| RKTVTAMDVVYALKR                           | 1752.1             | 3            | 4.9078 | 0.3716 |
| RKVEKDTMSDQALEALSASLGTR                   | 2507.8             | 3            | 4.0374 | 0.2487 |
| RKVLEEEEQR                                | 1316.4             | 2            | 3.0172 | 0.1425 |

| Peptide Sequence                   | Peptide mass (m/z) | Charge State | Xcorr  | DelCn2 |
|------------------------------------|--------------------|--------------|--------|--------|
| RKVPGEGLPLPK                       | 1291.6             | 2            | 3.1478 | 0.2338 |
| RKVSSAEGAAKEPK                     | 1587.8             | 2            | 2.9174 | 0.1253 |
| RKYEAFLQR                          | 1211.4             | 2            | 2.9129 | 0.1188 |
| RLAAAEETAVSPR                      | 1371.5             | 2            | 4.763  | 0.4147 |
| RLAAVALINAAIQK                     | 1452.8             | 2            | 3.9766 | 0.3372 |
| RLAEDEAFQR                         | 1235.3             | 2            | 2.7707 | 0.1125 |
| RLAEIQELHQSVR                      | 1579.8             | 2            | 2.9199 | 0.2164 |
| RLAISEDHVASVK                      | 1425.6             | 2            | 3.3038 | 0.3192 |
| RLAISEDHVASVKK                     | 1553.8             | 2            | 3.1355 | 0.3029 |
| RLAPEYEAAATR                       | 1348.5             | 2            | 4.6866 | 0.5111 |
| RLAPITSDPTEATAVGAVEASFK            | 2332.6             | 2            | 5.7538 | 0.4561 |
| RLASSVLR                           | 902.1              | 2            | 2.8643 | 0.1561 |
| RLASTSDIEEKENR                     | 1648.8             | 3            | 4.3296 | 0.2963 |
| RLATLLGLQAPPTR                     | 1507.8             | 2            | 2.6143 | 0.1776 |
| RLDEELEDAAEK                       | 1347.4             | 2            | 2.7748 | 0.2106 |
| RLDEELEDAAEKNLGESEIR               | 2246.4             | 3            | 3.3589 | 0.1241 |
| RLDEELEDAAEKNLGESEIRDAMMAK         | 2894.2             | 3            | 4.2226 | 0.3871 |
| RLDEVSR                            | 875.0              | 2            | 3.2937 | 0.1459 |
| RLDEYEQEEIDAFPR                    | 1883.0             | 2            | 4.0738 | 0.4289 |
| RLDGESSELQEQMVEQQQR                | 2291.4             | 3            | 5.1384 | 0.2915 |
| RLDIDEKPLVVQLNWNKDDR               | 2467.8             | 3            | 4.6557 | 0.2549 |
| RLDKFAAEHTIFASNTSSLQITSIANATTR     | 3266.6             | 3            | 5.9131 | 0.5254 |
| RLDKFNEVSVLK                       | 1547.8             | 2            | 3.2957 | 0.2569 |
| RLDLFQEHMFVLER                     | 1963.2             | 3            | 4.2751 | 0.3992 |
| RLDLPIER                           | 1012.2             | 2            | 2.5188 | 0.1464 |
| RLDLRDPAAALFETHGAEIR               | 2310.6             | 3            | 3.9863 | 0.3134 |
| RLDLVHTAALMLDKNNLVK                | 2165.6             | 3            | 5.156  | 0.2657 |
| RLDPDAIPSPIQVIEDDRNNR              | 2434.7             | 3            | 3.3433 | 0.1179 |
| RLDQVEQELNELRETEGGTVLTATTSELEAINKR | 3845.2             | 3            | 4.9356 | 0.401  |
| RLDTSLGSAR                         | 1076.2             | 2            | 2.5934 | 0.1743 |
| RLDTSSLKLSEYPNVEELR                | 2250.5             | 3            | 3.3223 | 0.157  |
| RLDVLQAIHTAR                       | 1393.6             | 2            | 2.6768 | 0.2188 |
| RLDVTVQSFGWSDR                     | 1666.8             | 2            | 2.7738 | 0.2023 |
| RLDYESQTAHDNLLTEQIHLSLIEAK         | 3013.3             | 3            | 5.4641 | 0.3758 |
| RLDYITAEIK                         | 1222.4             | 2            | 2.8932 | 0.2189 |
| RLDYITAEIKR                        | 1378.6             | 2            | 3.1504 | 0.3016 |

| Peptide Sequence                | Peptide mass (m/z) | Charge State | Xcorr  | DelCn2 |
|---------------------------------|--------------------|--------------|--------|--------|
| RLEAAYLDLQR                     | 1348.5             | 3            | 4.3218 | 0.2744 |
| RLEAELAAHEPAIQGVLDTGK           | 2219.5             | 2            | 4.6145 | 0.5379 |
| RLEAELAAHEPAIQGVLDTGKK          | 2347.7             | 2            | 5.2713 | 0.5003 |
| RLEAFEHPNVVR                    | 1467.7             | 2            | 2.8298 | 0.2366 |
| RLEALAAEFSSNWQK                 | 1750.9             | 2            | 3.2377 | 0.3651 |
| RLEASDGGLDSEAELAAELGMEHQAVVGAVK | 3025.3             | 3            | 6.9759 | 0.4402 |
| RLEAYLAR                        | 992.2              | 2            | 2.8237 | 0.1603 |
| RLEDELGGQFLDLSLHDTVTTLILGGHNK   | 3193.6             | 3            | 5.8336 | 0.4779 |
| RLEDLSESIVNDFAYMK               | 2031.3             | 2            | 5.0665 | 0.538  |
| RLEDLSESIVNDFAYMKK              | 2159.4             | 3            | 5.1199 | 0.487  |
| RLEDQLAGLQQELAALALK             | 2081.4             | 3            | 6.057  | 0.358  |
| RLEEAAALR                       | 958.1              | 2            | 2.5619 | 0.1542 |
| RLEEALMADMLAHVEELAR             | 2198.6             | 3            | 4.3908 | 0.2842 |
| RLEEASLLHQFQADADDIDAWMLDILK     | 3158.5             | 3            | 4.4384 | 0.2958 |
| RLEEEADRLITYLDQTTQK             | 2323.5             | 3            | 4.17   | 0.3799 |
| RLEEIPLIK                       | 1111.4             | 2            | 2.4993 | 0.1623 |
| RLEEKDKER                       | 1203.3             | 2            | 3.1353 | 0.1072 |
| RLEEKHEALLK                     | 1366.6             | 2            | 3.6594 | 0.2328 |
| RLEELDLGNNEIYNLPESIGALLHLK      | 2965.4             | 3            | 4.7187 | 0.2609 |
| RLEEMLRPLVEEGLR                 | 1841.2             | 2            | 3.8542 | 0.3416 |
| RLEEPEEPKVLTPEEQLADKLR          | 2620.9             | 3            | 5.0135 | 0.3546 |
| RLEEQAQHK                       | 1210.3             | 2            | 2.6851 | 0.1826 |
| RLEEQAQHKADIEER                 | 1924.1             | 3            | 4.0789 | 0.3454 |
| RLEESDVLQEAR                    | 1445.6             | 2            | 4.2553 | 0.3318 |
| RLEEWLGR                        | 1059.2             | 2            | 2.9044 | 0.1444 |
| RLEFENQK                        | 1064.2             | 2            | 2.5988 | 0.1671 |
| RLEFLYDKLR                      | 1353.6             | 3            | 4.3625 | 0.2933 |
| RLEFLYDKLREQTLSPTITSGLHNIAR     | 3173.6             | 3            | 3.6152 | 0.1514 |
| RLEFPSGETIVMHNPK                | 1856.1             | 3            | 5.2331 | 0.4321 |
| RLEFVAAR                        | 962.1              | 2            | 2.927  | 0.1845 |
| RLEGEDSAR                       | 1033.1             | 2            | 2.712  | 0.1822 |
| RLEGEDSARETPIGLVPK              | 1968.2             | 2            | 3.5483 | 0.2186 |
| RLEGILGGLGLR                    | 1254.5             | 2            | 3.0899 | 0.3311 |
| RLEGQEEEEEDNRDSSMK              | 2053.1             | 2            | 3.8381 | 0.3553 |
| RLEGTNVTNVNLHPGIVR              | 1975.3             | 3            | 5.4262 | 0.4384 |
| RLEHQGIR                        | 1009.1             | 2            | 2.6622 | 0.1911 |

| Peptide Sequence                       | Peptide mass (m/z) | Charge State | Xcorr  | DelCn2 |
|----------------------------------------|--------------------|--------------|--------|--------|
| RLELASNHFLYLPR                         | 1730.0             | 2            | 3.3169 | 0.2367 |
| RLELQLQEVQGR                           | 1469.7             | 2            | 4.0559 | 0.3135 |
| RLEMYGIR                               | 1038.2             | 2            | 2.4084 | 0.114  |
| RLEPVVSDAIYDSK                         | 1592.8             | 2            | 3.8374 | 0.2879 |
| RLEPVVSDAIYDSKAPNASNLK                 | 2388.7             | 3            | 5.2509 | 0.3825 |
| RLEQEKLELSR                            | 1401.6             | 2            | 3.9606 | 0.214  |
| RLEQEVDGVMR                            | 1332.5             | 2            | 2.9719 | 0.2076 |
| RLEQEVNQER                             | 1301.4             | 2            | 3.6285 | 0.1578 |
| RLEQNLSGEEHVQELLKEK                    | 2280.5             | 3            | 3.8205 | 0.2351 |
| RLEQSTLHVHQSQQQALR                     | 2160.4             | 3            | 3.4043 | 0.1272 |
| RLESIATTLVSHK                          | 1455.7             | 3            | 3.9753 | 0.1675 |
| RLESSEAER                              | 1077.1             | 2            | 2.7196 | 0.1924 |
| RLESSGAGGR                             | 990.1              | 2            | 3.1018 | 0.284  |
| RLETTYK                                | 973.1              | 2            | 2.4134 | 0.1243 |
| RLEVLDSTK                              | 1061.2             | 2            | 2.7389 | 0.2159 |
| RLFDQGLQHQVAHVATQLEAAR                 | 2637.0             | 3            | 4.3101 | 0.3109 |
| RLFEGNALLR                             | 1189.4             | 2            | 3.0553 | 0.2218 |
| RLFEQNVQR                              | 1190.3             | 2            | 2.9344 | 0.1286 |
| RLFIHESIHDDEVVNR                       | 1865.1             | 2            | 3.6938 | 0.2344 |
| RLGAPQQPGPGPPPSR                       | 1612.8             | 2            | 4.3906 | 0.3778 |
| RLGAPQQPGPGPPPSRR                      | 1769.0             | 3            | 4.6751 | 0.4177 |
| RLGDSSGPALKR                           | 1257.4             | 3            | 3.218  | 0.2474 |
| RLGELFNPYYDPLQWK                       | 2040.3             | 2            | 3.2493 | 0.2897 |
| RLGELPADHPKGRLLR                       | 1829.1             | 2            | 2.6437 | 0.2485 |
| RLGEPEDCAGIVSFLCSEDASYITGETVVVGGGTPSRL | 3887.3             | 3            | 7.2008 | 0.4841 |
| RLGGGLGGTR                             | 944.1              | 2            | 3.033  | 0.292  |
| RLGIFGDTEDVAGK                         | 1478.6             | 2            | 3.3705 | 0.2994 |
| RLGLHYVVYSGLENIKK                      | 1990.3             | 3            | 4.0753 | 0.3145 |
| RLGLSTLGELKQNLRS                       | 1786.1             | 3            | 4.1986 | 0.3907 |
| RLGQHVVGMAPLSVGSGLDDEPGGEAETK          | 2851.1             | 3            | 6.3008 | 0.3682 |
| RLGSLLPVLSPVSLPATLETPVPAFLK            | 3213.8             | 3            | 5.8434 | 0.4059 |
| RLGSLVDEFKELVYPPDYNPEGK                | 2667.0             | 3            | 4.8192 | 0.4291 |
| RLGSLVDEFKELVYPPDYNPEGKVTK             | 2995.4             | 3            | 3.4131 | 0.1424 |
| RLHAAEGVEPGSQR                         | 1507.6             | 2            | 3.7944 | 0.3825 |
| RLHGLPEQFLYGTATK                       | 1832.1             | 2            | 3.6984 | 0.3891 |
| RLIDLHSPSEIVK                          | 1507.8             | 2            | 3.0775 | 0.2823 |

| Peptide Sequence                   | Peptide mass (m/z) | Charge State | Xcorr  | DelCn2 |
|------------------------------------|--------------------|--------------|--------|--------|
| RLIFSTITSK                         | 1166.4             | 2            | 2.5881 | 0.1184 |
| RLKELIGATAGK                       | 1257.5             | 2            | 2.7598 | 0.1797 |
| RLKVPPAINQFTQALDR                  | 1968.3             | 3            | 4.2211 | 0.3162 |
| RLLDQIVEK                          | 1114.3             | 2            | 2.4719 | 0.1044 |
| RILLEDGEDFNLDALDSSNSMQTIQK         | 2898.1             | 3            | 7.1234 | 0.4945 |
| RLEGEESR                           | 1089.2             | 2            | 2.4175 | 0.1971 |
| RLELGPKEVAQQTR                     | 1836.1             | 2            | 4.6435 | 0.4435 |
| RLLSRPQDALEGVVLSPLSLEAR            | 2407.8             | 3            | 4.8758 | 0.3825 |
| RLLYMAIDGVAPR                      | 1475.8             | 2            | 2.9684 | 0.2194 |
| RLNAQILSQR                         | 1199.4             | 2            | 2.5728 | 0.1201 |
| RLNKHEENLK                         | 1281.4             | 2            | 3.6534 | 0.2219 |
| RLNMATLR                           | 975.2              | 2            | 2.8797 | 0.1777 |
| RLNQVIFPVSYNDFYKDVLEVGELAK         | 3186.6             | 3            | 3.3787 | 0.1118 |
| RLNSKPQDLTDAYGPPSNFLEIDIFNPQTVGVGR | 3761.2             | 3            | 6.6251 | 0.4516 |
| RLNSPIGR                           | 913.1              | 2            | 2.5288 | 0.1171 |
| RLNVTPLAR                          | 1040.2             | 2            | 3.1944 | 0.2632 |
| RLPAFTLSHLESHR                     | 1664.9             | 3            | 4.8731 | 0.2551 |
| RLPDAHSDYAR                        | 1301.4             | 2            | 3.8214 | 0.3653 |
| RLPEESGGR                          | 1001.1             | 2            | 2.5127 | 0.1902 |
| RLPENLYNDR                         | 1290.4             | 2            | 2.8987 | 0.192  |
| RLPEYPQVDDLLLR                     | 1728.0             | 2            | 2.8239 | 0.1084 |
| RLPGAIDVIGQTITISR                  | 1811.1             | 2            | 2.9171 | 0.2739 |
| RLPLNFLSGEK                        | 1274.5             | 2            | 3.4522 | 0.2966 |
| RLPNNHIGISFIPR                     | 1634.9             | 2            | 4.1387 | 0.3566 |
| RLPPQQIEK                          | 1109.3             | 2            | 2.633  | 0.1002 |
| RLPSSPASPSPK                       | 1224.4             | 2            | 2.7324 | 0.1502 |
| RLPTHTQLADTSK                      | 1468.6             | 2            | 3.932  | 0.3882 |
| RLPVMMDALSYLEK                     | 1796.1             | 2            | 3.4653 | 0.2398 |
| RLPVMMDALSYLEKR                    | 1952.3             | 3            | 4.0604 | 0.2426 |
| RLVPESITGFAR                       | 1443.7             | 2            | 2.6712 | 0.2355 |
| RLQAEAEEAR                         | 1173.3             | 2            | 2.8664 | 0.2081 |
| RLQALLGDLLDAQK                     | 1554.8             | 2            | 3.598  | 0.1701 |
| RLQEDKEQMAQQLAEETQGFQR             | 2664.9             | 3            | 5.7848 | 0.493  |
| RLQEEENLVITPR                      | 1468.7             | 2            | 3.82   | 0.3021 |
| RLQEETGAK                          | 1032.1             | 2            | 3.0357 | 0.1765 |
| RLQEQEELNYIEHVLLR                  | 2312.6             | 3            | 6.9694 | 0.4307 |

| Peptide Sequence                 | Peptide mass (m/z) | Charge State | Xcorr  | DelCn2 |
|----------------------------------|--------------------|--------------|--------|--------|
| RLQEQEELENYIEHVLLRRP             | 2565.9             | 3            | 5.7903 | 0.4441 |
| RLQGSGVTVNALHPGVAR               | 1833.1             | 2            | 4.329  | 0.4661 |
| RLQIEDFEAR                       | 1277.4             | 2            | 2.738  | 0.2519 |
| RLQIEESSKPVR                     | 1442.6             | 3            | 4.4483 | 0.3268 |
| RLQLSPWESSVVNR                   | 1671.9             | 2            | 4.2785 | 0.3697 |
| RLQNAHTGLDLTVPQHQEVR             | 2313.6             | 3            | 4.3919 | 0.3016 |
| RLQQAVLSR                        | 1071.3             | 2            | 2.5018 | 0.1392 |
| RLQQEDGISFEYHR                   | 1778.9             | 3            | 4.6881 | 0.3607 |
| RLQQTQAQVDEVVDIMR                | 2030.3             | 3            | 4.6551 | 0.3832 |
| RLQQTQNQVDEVVDIMR                | 2073.3             | 3            | 4.2605 | 0.371  |
| RLQSIGTENTEENR                   | 1647.7             | 2            | 4.4676 | 0.3475 |
| RLQSIGTENTEENRR                  | 1803.9             | 2            | 3.5993 | 0.2639 |
| RLQTQVFK                         | 1020.2             | 2            | 2.5452 | 0.1221 |
| RLQTSSVLVSGLR                    | 1416.7             | 2            | 4.4192 | 0.3928 |
| RLQVEQAPHSSPGAK                  | 1605.8             | 2            | 3.939  | 0.2619 |
| RLSEDYGVLK                       | 1180.3             | 2            | 2.5512 | 0.1129 |
| RLSEDYGVLKTDEGIAYR               | 2086.3             | 2            | 6.2187 | 0.476  |
| RLSESQLSFR                       | 1223.4             | 2            | 2.8702 | 0.2989 |
| RLSFAVPPFR                       | 1093.3             | 2            | 2.4786 | 0.1342 |
| RLSGTEAHVLGLVNHAVAQNEEGDAAYQR    | 3107.3             | 3            | 4.8002 | 0.2794 |
| RLSLESEGAGEGAAASPELSALEEAFRR     | 2905.1             | 3            | 4.7747 | 0.3413 |
| RLSLVPDSEQGEAILPR                | 1881.1             | 2            | 3.1705 | 0.1152 |
| RLSNVSSSGSINLLESPQLATLAEDVTAALAK | 3257.6             | 3            | 7.5562 | 0.4246 |
| RLSQPESAEK                       | 1145.2             | 2            | 3.008  | 0.1519 |
| RLSQYPNENLHSAVTK                 | 1858.0             | 3            | 4.2675 | 0.2458 |
| RLSTPAGVQVILR                    | 1410.7             | 2            | 3.2657 | 0.2114 |
| RLTDAFLLLR                       | 1218.5             | 2            | 2.581  | 0.1176 |
| RLTDLDKAQLLEIAK                  | 1728.0             | 3            | 4.1332 | 0.2338 |
| RLTELETAVR                       | 1188.4             | 2            | 2.7352 | 0.2525 |
| RLTEQKGEQQIQK                    | 1586.8             | 2            | 3.8069 | 0.1891 |
| RLTGFHETSNINDFSAGVANR            | 2307.5             | 3            | 5.0708 | 0.4981 |
| RLTLEDLEDSDWR                    | 1648.8             | 2            | 3.673  | 0.411  |
| RLTPLQLEIQR                      | 1367.6             | 2            | 3.3054 | 0.1369 |
| RLTPTEVKDYLAIA                   | 1661.9             | 2            | 2.839  | 0.3462 |
| RLTTDKANIKDLSQILK                | 1958.3             | 2            | 2.8292 | 0.1689 |
| RLTTDKANIKDLSQILKK               | 2086.5             | 3            | 3.6394 | 0.1747 |

| Peptide Sequence                        | Peptide mass (m/z) | Charge State | Xcorr  | DelCn2 |
|-----------------------------------------|--------------------|--------------|--------|--------|
| RLTVMSLQESGLK                           | 1462.7             | 2            | 3.6562 | 0.3239 |
| RLTVMSLQESGLKVNQPASFAIR                 | 2547.0             | 3            | 4.331  | 0.2751 |
| RLTVSSLQESGLK                           | 1418.6             | 2            | 4.0073 | 0.2625 |
| RLTVSSLQESGLKVNQPASFAVSLNGAK            | 2903.3             | 3            | 5.7636 | 0.3364 |
| RLVEEVTDKTLPK                           | 1643.9             | 3            | 3.8422 | 0.2495 |
| RLVEEVTDKTLPKLER                        | 2042.3             | 3            | 3.3029 | 0.1806 |
| RLVEVDSSR                               | 1061.2             | 2            | 2.5013 | 0.1547 |
| RLVEVDSSRQQEYDFK                        | 2000.2             | 2            | 3.2902 | 0.2758 |
| RLVNAAGSGR                              | 1001.1             | 2            | 3.5831 | 0.3319 |
| RLVPGGGATEIELAK                         | 1511.7             | 2            | 2.9086 | 0.2443 |
| RLVQSPNSYFMDVK                          | 1684.9             | 2            | 2.935  | 0.2649 |
| RLVSDGNINSDR                            | 1346.4             | 2            | 3.6077 | 0.2725 |
| RLVTTGVLK                               | 987.2              | 2            | 2.6528 | 0.1491 |
| RLVVLGFPCNQFGHQENCQNEEILNSLK            | 3231.7             | 3            | 4.1233 | 0.2855 |
| RLYGSEAFATDFQDSAAAK                     | 2049.2             | 2            | 4.9542 | 0.4786 |
| RLYPPSAEYPDLRK                          | 1705.9             | 3            | 3.9846 | 0.176  |
| RMATEVAADALGEEWKGYYVVR                  | 2352.7             | 3            | 4.6518 | 0.2827 |
| RMDAPASAAAVR                            | 1216.4             | 2            | 3.4434 | 0.2318 |
| RMDAPTSAAVTR                            | 1276.4             | 2            | 2.7858 | 0.1585 |
| RMDSFLSSVADMVQSIQVELEAEAEKMR            | 3201.6             | 3            | 4.2908 | 0.3296 |
| RMEELHNQEMQK                            | 1573.8             | 2            | 4.6478 | 0.3486 |
| RMEELHNQEMQKR                           | 1730.0             | 2            | 4.8072 | 0.3452 |
| RMEELHNQEVQK                            | 1541.7             | 2            | 4.1727 | 0.3412 |
| RMEELHNQEVQKR                           | 1697.9             | 2            | 4.716  | 0.3188 |
| RMEPPASKVPEVPTAPATDAAPK                 | 2361.7             | 3            | 5.0683 | 0.4012 |
| RMFGGPGTASR                             | 1137.3             | 2            | 2.7465 | 0.2236 |
| RMGESDDSILR                             | 1279.4             | 2            | 3.1936 | 0.1985 |
| RMGHAGAIAGGK                            | 1239.5             | 2            | 3.468  | 0.2378 |
| RMMEVAAADVK                             | 1221.5             | 2            | 2.5063 | 0.164  |
| RMPCAEDYLSVVLNQLCVLHEKTPVSDRVTK         | 3546.1             | 3            | 3.2205 | 0.1521 |
| RMPQAPPSLCVTPYPEPSECSWKDPEAEAALELALSITR | 4285.9             | 3            | 3.341  | 0.244  |
| RMQNDAENETTEKEEK                        | 2054.1             | 3            | 5.0406 | 0.3089 |
| RMYEQRDNLAQQSFNMEQANYTIQSLKDTK          | 3781.1             | 3            | 3.385  | 0.1211 |
| RNAEQYKDQADK                            | 1466.5             | 2            | 3.6599 | 0.3172 |
| RNDFQLIGIQDGYLSLLQDSGEVR                | 2738.0             | 3            | 6.4583 | 0.449  |
| RNDFQLIGIQDGYLSLLQDSGEVREDLR            | 3251.6             | 3            | 3.3798 | 0.2317 |



| Peptide Sequence                           | Peptide mass (m/z) | Charge State | Xcorr  | DelCn2 |
|--------------------------------------------|--------------------|--------------|--------|--------|
| RNDFQLIGIQDGYLSLLQDSGEVREDLRLPEGD LGKEIEQK | 4689.2             | 3            | 4.0725 | 0.3594 |
| RNEDEDSPNKLYTLVTYVPVTTFK                   | 2831.1             | 3            | 4.674  | 0.3386 |
| RNEFLGELQKK                                | 1362.6             | 3            | 4.1349 | 0.2501 |
| RNEIDAEPKAKR                               | 1396.5             | 2            | 3.3222 | 0.2408 |
| RNFILDQTNVSAAAQR                           | 1805.0             | 2            | 3.4151 | 0.3331 |
| RNFTSAGDHIIDGLHAESPDDLVR                   | 2750.0             | 3            | 3.5672 | 0.1564 |
| RNGAAGPHSPDLLDEQAFGDLTDLPVVVK              | 3128.4             | 3            | 4.5715 | 0.2872 |
| RNGQGDAPPTPPPTPVDLELEWVLGKMPR              | 3169.6             | 3            | 3.3797 | 0.1942 |
| RNIPPYFVALVPQEEELDDQKIQVTPPGFQLVFLPFADDKR  | 4772.4             | 3            | 4.8321 | 0.3251 |
| RNKLDHYAIKFP LTTESAMK                      | 2477.9             | 3            | 3.3421 | 0.1136 |
| RNLDFQDVLDKLADMGI AIR                      | 2304.7             | 3            | 4.798  | 0.4112 |
| RNLDIRPTYTNLNR                             | 1876.1             | 2            | 3.2375 | 0.1689 |
| RNLGSINTELQDVQR                            | 1743.9             | 2            | 3.7746 | 0.3068 |
| RNPAGSVVMER                                | 1216.4             | 2            | 2.876  | 0.2884 |
| RNPDTQWITKPVHK                             | 1721.0             | 3            | 4.1004 | 0.3372 |
| RNQDLAPNSAEQASILSLVTK                      | 2256.5             | 2            | 4.1642 | 0.3263 |
| RNSDLLLV DTHKK                             | 1652.9             | 3            | 3.6337 | 0.1847 |
| RNTTGTGR                                   | 862.9              | 2            | 2.437  | 0.2084 |
| RPAEAE AHR                                 | 1037.1             | 2            | 2.5722 | 0.1471 |
| RPAEDDVPR                                  | 1055.1             | 2            | 3.2676 | 0.2177 |
| RPAEDMEEEQAFK                              | 1580.7             | 2            | 3.7277 | 0.3694 |
| RPAEDMEEEQAFKR                             | 1736.9             | 3            | 5.8609 | 0.3916 |
| RPAEDYVPR                                  | 1103.2             | 2            | 3.5746 | 0.2965 |
| RPAGDYVPR                                  | 1031.2             | 2            | 3.2112 | 0.234  |
| RPAILTYHDVGLNYK                            | 1761.0             | 2            | 4.2918 | 0.4528 |
| RPANQFVPR                                  | 1085.2             | 2            | 2.9826 | 0.245  |
| RPASVSSSA AVEHEQR                          | 1711.8             | 2            | 4.3234 | 0.3174 |
| RPAVASARPSILPSK                            | 1550.8             | 2            | 2.693  | 0.2051 |
| RPAVVYIGSAGK PHER                          | 1738.0             | 3            | 4.5251 | 0.3828 |
| RPCFSALEVDETYVPK                           | 1855.1             | 2            | 4.1598 | 0.35   |
| RPDADLKTYFTDK                              | 1570.7             | 2            | 4.2048 | 0.3961 |
| RPDADLKTYFTDKK                             | 1698.9             | 2            | 3.3692 | 0.2167 |
| RPDGF DGLGYR                               | 1253.3             | 2            | 2.6952 | 0.1989 |
| RPDIQYPDATDEDITSHMESEELNGAYK               | 3226.4             | 3            | 7.9082 | 0.5174 |
| RPDLLTMVVDYR                               | 1478.7             | 2            | 4.0111 | 0.3207 |
| RPDLYGNLGHPLS                              | 1439.6             | 2            | 3.0998 | 0.362  |

| Peptide Sequence               | Peptide mass (m/z) | Charge State | Xcorr  | DelCn2 |
|--------------------------------|--------------------|--------------|--------|--------|
| RPDNTAFK                       | 949.0              | 2            | 2.4122 | 0.1476 |
| RPDPIDWSLK                     | 1227.4             | 2            | 3.1232 | 0.2991 |
| RPDQQLQGEGK                    | 1256.4             | 2            | 3.7797 | 0.326  |
| RPDVVENQPDAASQLNVDASGNLAK      | 2609.8             | 3            | 5.6659 | 0.3704 |
| RPEAAQLLEDVQAALKPFSVK          | 2311.7             | 2            | 6.9478 | 0.4228 |
| RPEDQELESLSAIEAELEK            | 2187.3             | 3            | 6.3765 | 0.5132 |
| RPEDQELESLSAIEAELEKVAHQL       | 2736.0             | 3            | 5.0148 | 0.4067 |
| RPEDQELESLSAIEAELEKVAHQQLQ     | 2864.1             | 3            | 4.9344 | 0.3002 |
| RPEDQELESLSAIEAELEKVAHQQLQAL   | 3048.4             | 3            | 5.6126 | 0.4545 |
| RPEDQELESLSAIEAELEKVAHQQLQALR  | 3204.5             | 3            | 8.2344 | 0.5653 |
| RPEDQELESLSAIEAELEKVAHQQLQALRR | 3360.7             | 3            | 3.3223 | 0.2323 |
| RPEEVALGLHHR                   | 1414.6             | 3            | 4.1662 | 0.28   |
| RPEFQTLTTESESEHGER             | 2146.3             | 3            | 5.1164 | 0.305  |
| RPEGASNESERD                   | 1347.3             | 2            | 3.1937 | 0.3587 |
| RPEGPGAQAPSSPR                 | 1407.5             | 2            | 2.6627 | 0.263  |
| RPEIPTEQSR                     | 1213.3             | 2            | 3.14   | 0.1503 |
| RPEKPVPPPPPIAK                 | 1523.8             | 2            | 4.4818 | 0.3214 |
| RPELEDSTLR                     | 1216.3             | 2            | 3.1018 | 0.313  |
| RPELGVTLTK                     | 1114.3             | 2            | 2.4213 | 0.1874 |
| RPELLTHSTTEVTQPR               | 1866.1             | 2            | 4.4738 | 0.4718 |
| RPELPDLAPEPR                   | 1390.6             | 2            | 3.5834 | 0.1647 |
| RPENPKPQDGK                    | 1266.4             | 2            | 2.7707 | 0.1817 |
| RPENPKPQDGKETK                 | 1624.8             | 2            | 3.9238 | 0.2502 |
| RPENSLEETLHFDHAVR              | 2164.4             | 3            | 3.2887 | 0.2806 |
| RPEQVTWAAQEQELESREQLQEGVNR     | 3097.3             | 3            | 4.1471 | 0.3538 |
| RPESALLGGSEAGER                | 1529.6             | 3            | 4.9042 | 0.4344 |
| RPESALLGGSEAGERLLQQGLAQVEAGR   | 2894.2             | 3            | 5.777  | 0.3945 |
| RPESALLGGSEAGERLLQQGLAQVEAGR   | 3050.4             | 3            | 3.319  | 0.3576 |
| RPESFTTPEGPKPR                 | 1599.8             | 2            | 2.8809 | 0.1764 |
| RPETPSSGPLDEEGAVAPVLANGHAPYSR  | 2976.2             | 3            | 3.6931 | 0.2452 |
| RPEVDGEKYQK                    | 1349.5             | 2            | 2.6845 | 0.2226 |
| RPEVDGVR                       | 928.0              | 2            | 2.768  | 0.1974 |
| RPFVTTQSFSGSNAEGQHSGFGPQPNPEK  | 3074.3             | 3            | 3.6493 | 0.1167 |
| RPFPPFHSPSR                    | 1375.6             | 2            | 2.9093 | 0.2411 |
| RPFGISALIVGFDFDGTTPR           | 2066.3             | 2            | 3.3788 | 0.3144 |
| RPFPEIDEILGVR                  | 1705.0             | 2            | 3.946  | 0.3409 |

| Peptide Sequence                             | Peptide mass (m/z) | Charge State | Xcorr  | DelCn2 |
|----------------------------------------------|--------------------|--------------|--------|--------|
| RPGAVATGDIGR                                 | 1170.3             | 2            | 2.8479 | 0.2719 |
| RPGGEPSPGTTGQSYNQYSQR                        | 2397.5             | 3            | 5.7335 | 0.4885 |
| RPGHSLEAER                                   | 1152.2             | 2            | 2.4859 | 0.203  |
| RPGIIVAPVLPGAYQQSHSQGYGYMHQTSVSSMR           | 3705.2             | 3            | 6.4302 | 0.4628 |
| RPGLEGLLAGVDNNLVELEAAR                       | 2307.6             | 3            | 4.8667 | 0.3915 |
| RPGPAGELLLQDIPTGSAPAAQHR                     | 2453.7             | 2            | 4.0123 | 0.2001 |
| RPGSVSSTDQER                                 | 1319.4             | 2            | 3.1796 | 0.3485 |
| RPGVSPGGLSVPGPGAPLEKPGRR                     | 2468.8             | 3            | 4.3792 | 0.3162 |
| RPHDYQPLPGMSENPSVYVPGVVSTVVPDSAHR            | 3562.0             | 3            | 4.9114 | 0.4327 |
| RPHFPQFSYSASGTA                              | 1653.8             | 2            | 3.4572 | 0.3262 |
| RPHGDIYGINQALGATAK                           | 1883.1             | 2            | 4.4731 | 0.4056 |
| RPHLSIILVGDNPASHTYVR                         | 2246.6             | 3            | 3.413  | 0.1225 |
| RPHLSVILVGENPASHSYVLNK                       | 2431.8             | 3            | 4.9926 | 0.2581 |
| RPHNAIFVNFEEVDPKPLEAAAQTWR                   | 3294.6             | 3            | 4.803  | 0.1848 |
| RPISADSAIMNPASK                              | 1558.8             | 2            | 4.2877 | 0.4292 |
| RPKDDQVFEAVGTTDELSSAIGFALELVTEK              | 3367.7             | 3            | 3.2479 | 0.2269 |
| RPLDAHLALVNQHPGPFPR                          | 2249.6             | 3            | 3.7191 | 0.2367 |
| RPLDDGVGNQLGALVHQR                           | 1946.2             | 3            | 5.8927 | 0.3774 |
| RPLEAPPER                                    | 1065.2             | 2            | 2.4315 | 0.2453 |
| RPLEDGDQPDAAK                                | 1341.4             | 2            | 2.9515 | 0.2131 |
| RPLEDGDQPDAAK                                | 1469.6             | 2            | 4.2496 | 0.3436 |
| RPLEQQQPHHIPTSAPVYQQPQQQPVAQSYGGYKEPAAPVSIQR | 4937.4             | 3            | 5.2721 | 0.37   |
| RPLFLAPDFDR                                  | 1347.5             | 2            | 3.0134 | 0.2728 |
| RPLIDQVVQTALSETQDPEEVSVTVK                   | 2883.2             | 3            | 5.9212 | 0.4451 |
| RPLILQLIFSK                                  | 1328.7             | 2            | 2.7235 | 0.1012 |
| RPLILQLVHVSQEDKR                             | 1932.3             | 2            | 4.1808 | 0.3746 |
| RPLILQLVHVSQEDKRR                            | 2060.4             | 3            | 3.4632 | 0.3711 |
| RPLLGLVLTPTTR                                | 1336.7             | 2            | 3.2997 | 0.3107 |
| RPLMVLGSQALLTPTSADKLR                        | 2268.7             | 3            | 5.0436 | 0.2817 |
| RPLNSVVLQQGLADR                              | 1666.9             | 2            | 4.1354 | 0.4397 |
| RPLPFAPR                                     | 954.2              | 2            | 2.517  | 0.116  |
| RPLQEHVR                                     | 1035.2             | 2            | 2.9079 | 0.2562 |
| RPLRPQVVTTDDGQAPEAK                          | 2093.3             | 2            | 4.009  | 0.3775 |
| RPLVLQLVNATTEYAEFLHCK                        | 2446.9             | 3            | 3.7079 | 0.2195 |
| RPMEEDGEEKSPSK                               | 1619.7             | 3            | 4.2278 | 0.3247 |
| RPMEEDGEEKSPSKK                              | 1747.9             | 2            | 4.1768 | 0.316  |

| Peptide Sequence               | Peptide mass (m/z) | Charge State | Xcorr  | DelCn2 |
|--------------------------------|--------------------|--------------|--------|--------|
| RPNKPLFTALVTQCQK               | 1845.2             | 2            | 4.073  | 0.2875 |
| RPNKQEESESPVERPLKENPPNK        | 2703.9             | 3            | 3.5528 | 0.1604 |
| RPNPAPGTR                      | 966.1              | 2            | 2.6714 | 0.1637 |
| RPNPDILDSHER                   | 1362.5             | 2            | 2.6171 | 0.2011 |
| RPNSVQPGAER                    | 1211.3             | 2            | 2.4655 | 0.1691 |
| RPNVLLLLTDDQDEVLGGMTPKK        | 2653.1             | 3            | 7.5491 | 0.4268 |
| RPPASDGLDLSQAAAR               | 1625.8             | 2            | 2.7581 | 0.1389 |
| RPPENEAPPVPFLHAQR              | 1956.2             | 2            | 4.0919 | 0.4019 |
| RPPGFSPFR                      | 1061.2             | 2            | 2.4744 | 0.1975 |
| RPPGREAYPGDVLYLHSR             | 2118.3             | 3            | 4.3852 | 0.3675 |
| RPPGVLHCTTK                    | 1209.4             | 2            | 2.532  | 0.1405 |
| RPPIGYR                        | 859.0              | 2            | 2.4656 | 0.131  |
| RPPPAPAQPPEPEALPTIYVVTPTYAR    | 2930.3             | 3            | 3.5571 | 0.2169 |
| RPPSAFFLFCSEYRPK               | 1946.3             | 3            | 5.5644 | 0.3648 |
| RPPSGFFLFCSEFRPK               | 1916.2             | 3            | 4.5566 | 0.2779 |
| RPPSPIKFDLNEPLHLSFLQNAAK       | 2734.1             | 2            | 3.8013 | 0.3834 |
| RPPTAGSQFK                     | 1089.2             | 2            | 2.7188 | 0.2075 |
| RPQIDPAVEGFIR                  | 1498.7             | 2            | 3.3459 | 0.4529 |
| RPQYPYPSKK                     | 1361.6             | 2            | 2.7985 | 0.204  |
| RPQTDQAVEFFIR                  | 1607.8             | 2            | 4.4411 | 0.3415 |
| RPQYSNPPVQGEVMEGADNQGAGEQGRPVR | 3225.5             | 3            | 5.8257 | 0.4165 |
| RPRDDYR                        | 978.0              | 2            | 2.627  | 0.2227 |
| RPSAPVDFSK                     | 1104.2             | 2            | 2.895  | 0.1021 |
| RPSENLGQVLFGER                 | 1602.8             | 2            | 5.276  | 0.5092 |
| RPSGNLVSLSGAEGSFVSSLVK         | 2291.6             | 2            | 5.6866 | 0.5614 |
| RPSNYPESYFQR                   | 1544.7             | 2            | 2.5151 | 0.2025 |
| RPSPLAHQVPVR                   | 1355.6             | 3            | 3.2304 | 0.3153 |
| RPSSPLIDIKPIEFGVLSAK           | 2168.6             | 2            | 2.4732 | 0.1399 |
| RPSTSQTVSTPAPVPVIESTEAIK       | 2697.0             | 3            | 3.7902 | 0.2166 |
| RPTEICADPQFIIGGATR             | 1946.2             | 2            | 3.7698 | 0.3135 |
| RPTLLSNPQFIVDGATR              | 2015.3             | 3            | 4.8809 | 0.4258 |
| RPTLQAVR                       | 941.1              | 2            | 2.4537 | 0.102  |
| RPTPATLVLTSDQSSPEIDEDRIPNPHLK  | 3228.6             | 3            | 5.0135 | 0.3514 |
| RPTPNDDTLDEGVGLVHSNIATEHIPSPAK | 3182.4             | 3            | 6.7825 | 0.445  |
| RPVDSYDIPKTEEASSGFLPGDR        | 2537.7             | 3            | 5.0114 | 0.3927 |
| RPVELVPPESPLAQLFLER            | 2191.6             | 3            | 6.1851 | 0.4481 |

| Peptide Sequence                     | Peptide mass (m/z) | Charge State | Xcorr  | DelCn2 |
|--------------------------------------|--------------------|--------------|--------|--------|
| RPVFDDKEDVNFDFHFQILR                 | 2391.6             | 3            | 3.3566 | 0.1464 |
| RPVGASFSFGGK                         | 1210.4             | 2            | 3.8749 | 0.3551 |
| RPVLFQEYLDIDQMIFNR                   | 2298.6             | 3            | 4.5974 | 0.2911 |
| RPVLLHPLGGWTK                        | 1587.9             | 2            | 4.5609 | 0.4081 |
| RPVSAMFIFSEEK                        | 1541.8             | 2            | 3.0887 | 0.1433 |
| RPYGVGLLIAGYDDMGPHIFQTCPSANYFDCR     | 3579.0             | 3            | 5.307  | 0.4035 |
| RQAPHHAADDGVGA AVTEQELLALD TIRPEHVLR | 3688.1             | 3            | 3.6153 | 0.2653 |
| RQAQQRDELADEIANSSGK                  | 2246.3             | 3            | 3.8354 | 0.3971 |
| RQAQQRDELADEIANSSGKGALALEEKR         | 3214.5             | 3            | 3.9668 | 0.307  |
| RQATTIADNIIFLSDQTK                   | 2149.4             | 2            | 2.8611 | 0.2002 |
| RQAVDVSPLR                           | 1141.3             | 2            | 2.5968 | 0.1799 |
| RQDLEDSLQAQQYFADANEAESWMR            | 3003.2             | 3            | 3.826  | 0.2593 |
| RQDSEDHSSDMFN YEEYCTANAVTGPCR        | 3227.4             | 3            | 3.947  | 0.2098 |
| RQDVLYELMQTEVHHVR                    | 2154.4             | 3            | 4.3493 | 0.2975 |
| RQEALPLHQETK                         | 1450.6             | 2            | 4.1039 | 0.3524 |
| RQEEEEAGALEAGEEAR                    | 1745.8             | 2            | 4.3496 | 0.1657 |
| RQEEEEESVKK                          | 1262.4             | 2            | 2.662  | 0.1186 |
| RQEELNNQLFLYDTHQNL R                 | 2432.6             | 3            | 4.4813 | 0.2896 |
| RQEILSNAGLR                          | 1257.4             | 2            | 2.9067 | 0.2057 |
| RQELDAFLAQALSPK                      | 1687.9             | 2            | 3.5404 | 0.2912 |
| RQELEQVLGIR                          | 1341.5             | 2            | 3.3379 | 0.2937 |
| RQELVTKIDHILDAL                      | 1765.0             | 2            | 3.4941 | 0.321  |
| RQEYLDQQLQK                          | 1449.6             | 2            | 3.7037 | 0.159  |
| RQFASQANVVG PWIQTK                   | 1931.2             | 3            | 4.432  | 0.3174 |
| RQFHLLTDDDLLR                        | 1529.7             | 2            | 3.8016 | 0.2791 |
| RQGGLAGSVR                           | 1001.1             | 2            | 3.0448 | 0.2386 |
| RQGGLGPIRIPLLSDLTHQISK               | 2400.8             | 3            | 3.6331 | 0.3972 |
| RQGTDPISQTK                          | 1231.3             | 2            | 2.76   | 0.179  |
| RQGYGEGFR                            | 1070.1             | 2            | 2.6187 | 0.3143 |
| RQHEAEEGVR                           | 1211.3             | 2            | 3.2163 | 0.237  |
| RQHRPPALLTLYPAPDEDEAVER              | 2675.0             | 3            | 3.2161 | 0.1379 |
| RQIASEKEEIER                         | 1488.6             | 2            | 2.7948 | 0.1619 |
| RQIQAAYSILSEVQQAVSQGSSDSQILDLSNR     | 3493.8             | 3            | 5.9265 | 0.3782 |
| RQLEEAE EEAQR                        | 1488.5             | 2            | 4.7581 | 0.2808 |
| RQLEEAE EEAQRANASR                   | 1988.1             | 2            | 4.5127 | 0.3349 |
| RQLEEAE EEAATR                       | 1461.5             | 2            | 3.9939 | 0.3069 |

| Peptide Sequence             | Peptide mass (m/z) | Charge State | Xcorr  | DelCn2 |
|------------------------------|--------------------|--------------|--------|--------|
| RQLEEKEKLLATEQEDAAVAK        | 2400.7             | 3            | 3.9354 | 0.3013 |
| RQLETLGQEK                   | 1202.3             | 2            | 2.8345 | 0.1488 |
| RQLFHPEQLITGKEDAANNYAR       | 2572.8             | 3            | 5.9331 | 0.3298 |
| RQLLEGELETLR                 | 1457.7             | 2            | 3.0789 | 0.2632 |
| RQLPVTR                      | 870.0              | 2            | 2.6042 | 0.1772 |
| RQNVAYEYLCHLEEAQR            | 2123.4             | 3            | 3.655  | 0.1928 |
| RQPAPPR                      | 822.0              | 2            | 2.4092 | 0.1108 |
| RQPEAVHLLDK                  | 1306.5             | 2            | 2.4508 | 0.1543 |
| RQQEELLAENQR                 | 1643.7             | 2            | 5.2396 | 0.3641 |
| RQQEEMMR                     | 1108.3             | 2            | 3.1847 | 0.1496 |
| RQQEGFKGTFPDAR               | 1637.8             | 2            | 3.7754 | 0.4392 |
| RQQEGFKPNYMER                | 1798.0             | 2            | 3.3729 | 0.2402 |
| RQQETAAAETETR                | 1491.5             | 2            | 4.6732 | 0.4128 |
| RQQHEQLNEAAQGILTGPGDVSLSQVQK | 3221.5             | 3            | 5.5146 | 0.2532 |
| RQQLDEQILLQHSK               | 1850.1             | 3            | 3.7035 | 0.2329 |
| RQSHLLQSSIPDQQLK             | 2105.4             | 3            | 3.6005 | 0.2315 |
| RQTSGGPVDASSEYQQELER         | 2238.3             | 3            | 5.83   | 0.4875 |
| RQTSGGPVDASSEYQQELERELFK     | 2755.9             | 3            | 6.57   | 0.4458 |
| RQTSGGPVDASSEYQQELERELFKLK   | 2997.3             | 3            | 4.7488 | 0.2499 |
| RQVDQLTNDK                   | 1217.3             | 2            | 2.436  | 0.1023 |
| RQVDQLTNDKAR                 | 1444.6             | 3            | 4.402  | 0.3824 |
| RQVEDLQATFSSIHSFQDLSSSILAQSR | 3152.4             | 3            | 5.8087 | 0.4365 |
| RQVKPNATLEK                  | 1284.5             | 2            | 2.6448 | 0.1291 |
| RQVPVEEAR                    | 1084.2             | 2            | 2.7307 | 0.1183 |
| RQVQDESQR                    | 1146.2             | 2            | 2.8107 | 0.1082 |
| RQVQSLTCEVDALKGTNESLER       | 2477.7             | 3            | 5.0423 | 0.3578 |
| RQVVEAAQAPIQER               | 1595.8             | 2            | 5.0639 | 0.4029 |
| RQWVEEFFPSVSLGDPTLETLLR      | 2721.1             | 3            | 3.3108 | 0.2243 |
| RRDELSEEINNLR                | 1644.8             | 2            | 3.5541 | 0.2561 |
| RRDETMQPAKPSFLEYFEQK         | 2501.8             | 3            | 3.6444 | 0.169  |
| RRDFTPAELR                   | 1261.4             | 2            | 2.5794 | 0.2695 |
| RREDNLNDSSQQLQDSL            | 2175.3             | 3            | 4.0673 | 0.265  |
| RREGAPGDPEAALEDNLR           | 2167.3             | 2            | 4.3157 | 0.3354 |
| RREGLFQRSSRPR                | 1645.9             | 2            | 2.6975 | 0.1369 |
| RRELEEETNAFNR                | 1664.8             | 3            | 3.8508 | 0.3568 |
| RREPLPSLEAVYLITPSEK          | 2199.5             | 3            | 3.715  | 0.2843 |

| Peptide Sequence                 | Peptide mass (m/z) | Charge State | Xcorr  | DelCn2 |
|----------------------------------|--------------------|--------------|--------|--------|
| RRFETANLDIPPANASR                | 1929.1             | 3            | 3.6591 | 0.2472 |
| RRFPEEPHVPLEQR                   | 1791.0             | 2            | 3.912  | 0.1137 |
| RRGEEGHDPKEPEQLR                 | 1934.1             | 2            | 4.2709 | 0.3474 |
| RRGETESEEFEK                     | 1497.5             | 2            | 2.4747 | 0.2117 |
| RRGETESEEFKLLK                   | 1738.9             | 2            | 3.7977 | 0.1027 |
| RRLELQLQEVQGR                    | 1625.9             | 2            | 2.758  | 0.1552 |
| RRPEDQELESLSAIEAELEK             | 2343.5             | 3            | 5.3469 | 0.4368 |
| RRPEDYDIHNSR                     | 1558.6             | 2            | 3.8678 | 0.3842 |
| RRPEIGTFLR                       | 1245.5             | 3            | 3.5539 | 0.2052 |
| RRPELIPEDLHR                     | 1531.7             | 3            | 3.4258 | 0.1322 |
| RRPEPIIPVTQPR                    | 1559.8             | 2            | 3.0199 | 0.1904 |
| RRPNDPVPIPKR                     | 1560.8             | 2            | 3.0334 | 0.1385 |
| RRPPLAGLLDALAEER                 | 1849.1             | 3            | 3.8593 | 0.3028 |
| RRPTATLVLTSDQSSPEIDEDRIPNPHLK    | 3384.7             | 3            | 4.9499 | 0.3215 |
| RRRSSYSYSPVKKKKKKSSKHKRR         | 3156.7             | 3            | 3.5    | 0.1763 |
| RRTEEGPTLSYGR                    | 1522.6             | 2            | 2.7142 | 0.2029 |
| RSAPGGGSK                        | 816.9              | 2            | 2.7552 | 0.1643 |
| RSASASHQADIK                     | 1271.4             | 2            | 2.4315 | 0.1556 |
| RSDDMFTFHGPGK                    | 1495.6             | 2            | 2.8321 | 0.1003 |
| RSDSVILNVLYGPDAPTISPLNTSYR       | 2850.2             | 3            | 3.9752 | 0.1998 |
| RSDSVSASER                       | 1094.1             | 2            | 3.0268 | 0.2022 |
| RSEAAEAITSFNGHKPPGSSEPITVK       | 2770.0             | 3            | 4.1285 | 0.2567 |
| RSEKDTAAVSR                      | 1319.5             | 2            | 4.135  | 0.3509 |
| RSELEEQQMHLNVGLR                 | 1940.2             | 2            | 4.9657 | 0.401  |
| RSELEEQQMHLNVGLRK                | 2068.3             | 2            | 3.6529 | 0.2033 |
| RSELPAAELTGHR                    | 1580.8             | 2            | 3.0719 | 0.1755 |
| RSENEEFVEVGR                     | 1451.5             | 2            | 3.7571 | 0.2918 |
| RSGQVLEVSGSK                     | 1247.4             | 2            | 3.0802 | 0.2155 |
| RSINQPVAFVR                      | 1287.5             | 2            | 3.0512 | 0.2985 |
| RSKAEELGLPILGVLR                 | 1752.1             | 3            | 3.7172 | 0.276  |
| RSLDSRGETTGSGRAIPIKQSFLKRSNGSLNK | 3576.0             | 3            | 3.4648 | 0.2109 |
| RSLEPLPSSGPDFGGLGEEAEFVEVEPEAK   | 3174.4             | 3            | 5.2151 | 0.3223 |
| RSLGEGAKEREALRRSNEELR            | 2457.7             | 3            | 3.2005 | 0.2895 |
| RSNMDNMFESYINNLR                 | 2005.2             | 3            | 5.1388 | 0.3677 |
| RSNMHFTSSSTGGLSSSQSSYSPSNR       | 2750.9             | 3            | 5.1985 | 0.4178 |
| RSPFLQVFNNSPDESSYYR              | 2307.5             | 3            | 4.1471 | 0.2722 |

| Peptide Sequence                        | Peptide mass (m/z) | Charge State | Xcorr  | DelCn2 |
|-----------------------------------------|--------------------|--------------|--------|--------|
| RSPHFFQPTNQQFK                          | 1763.0             | 2            | 4.7572 | 0.2735 |
| RSPIIPLAK                               | 979.2              | 2            | 2.7045 | 0.2332 |
| RSPPPSPTTQR                             | 1224.4             | 2            | 2.5232 | 0.1017 |
| RSPSKPLPEVTDEYK                         | 1746.9             | 2            | 3.2623 | 0.1906 |
| RSPSKPLPEVTDEYKNDVK                     | 2203.4             | 3            | 5.673  | 0.4127 |
| RSQAGVSSGAPPGR                          | 1327.4             | 2            | 2.917  | 0.308  |
| RSQIYGSR                                | 967.1              | 2            | 2.4483 | 0.1378 |
| RSTITSR                                 | 820.9              | 2            | 2.4098 | 0.1129 |
| RSYDVPPPPMEPDHPFYSNISK                  | 2574.9             | 3            | 4.7029 | 0.3727 |
| RTAEHEAAQQDLQSK                         | 1712.8             | 2            | 4.426  | 0.337  |
| RTAQEVETYR                              | 1253.3             | 2            | 2.4585 | 0.1318 |
| RTAQEVETYRR                             | 1409.5             | 3            | 3.2201 | 0.332  |
| RTCEEHQLCVVAVLPHILDTGAAGR               | 2690.1             | 3            | 3.8255 | 0.1193 |
| RTDEATFSKIPIGFIPLGETSSLSHTLFAESGNK      | 3653.1             | 3            | 5.0733 | 0.2736 |
| RTDEEGKDVPDHAVLEMK                      | 2070.3             | 3            | 3.802  | 0.2297 |
| RTDIFGVEETAIGK                          | 1536.7             | 2            | 4.3973 | 0.3811 |
| RTDIFGVEETAIGKK                         | 1664.9             | 2            | 4.8671 | 0.3998 |
| RTDKDTEITCSER                           | 1554.7             | 2            | 3.6354 | 0.1664 |
| RTDLCDHALHISHDEL                        | 1876.0             | 2            | 3.6749 | 0.2578 |
| RTEEGPTLSYGR                            | 1366.5             | 2            | 3.8607 | 0.3129 |
| RTEGVGPGVPGEVEMVK                       | 1742.0             | 2            | 2.4058 | 0.2599 |
| RTEGVGPGVPGEVEMVKGQPFVGVPR              | 2696.0             | 3            | 4.751  | 0.3484 |
| RTEITIVKPQESAHR                         | 1766.0             | 2            | 4.7881 | 0.4036 |
| RTEMENEFVLIK                            | 1509.8             | 2            | 2.7106 | 0.1217 |
| RTEMENEFVLIKK                           | 1637.9             | 2            | 5.5995 | 0.291  |
| RTEQEEDEELLTESSK                        | 1924.0             | 2            | 2.9919 | 0.2503 |
| RTFEDISEK                               | 1125.2             | 2            | 3.1911 | 0.1733 |
| RTGAIVDVPVGEELLGR                       | 1782.0             | 2            | 4.4898 | 0.3755 |
| RTGFSFPTQEPRPQTQNLGTPGPALSHSR           | 3166.5             | 3            | 3.9988 | 0.3416 |
| RTGKTSIAIDIINQK                         | 1760.0             | 2            | 4.0863 | 0.423  |
| RTGPAATTLPDGAAAESLVESSEVAVIGFFK         | 3093.4             | 3            | 4.3209 | 0.3751 |
| RTGPAATTLPDGAAAESLVESSEVAVIGFFKDVESDSAK | 3925.3             | 3            | 6.0761 | 0.5385 |
| RTGPPMGSR                               | 959.1              | 2            | 2.5923 | 0.1896 |
| RTHLPEVFLSK                             | 1327.6             | 2            | 3.6468 | 0.3032 |
| RTHNGESVSYLFSHVPL                       | 1944.1             | 2            | 2.5346 | 0.178  |
| RTIAQDYGVKKADEGISFR                     | 2140.4             | 2            | 3.8257 | 0.3814 |



| Peptide Sequence                      | Peptide mass (m/z) | Charge State | Xcorr  | DelCn2 |
|---------------------------------------|--------------------|--------------|--------|--------|
| RTIQFVDWCPTGFK                        | 1699.0             | 2            | 3.6745 | 0.4286 |
| RTLEGELHDLR                           | 1339.5             | 2            | 2.841  | 0.283  |
| RTLEGELHDLRGQVAK                      | 1823.0             | 3            | 3.4792 | 0.3364 |
| RTLKIPAMTIAK                          | 1343.7             | 2            | 2.4919 | 0.1847 |
| RTNSTFNQVVLKR                         | 1563.8             | 2            | 4.5715 | 0.3795 |
| RTPDGFDSVPLK                          | 1332.5             | 2            | 2.8119 | 0.2036 |
| RTPFGAYGGLLK                          | 1280.5             | 2            | 3.1254 | 0.1887 |
| RTPFGAYGGLLKDFTATDLSEFAAK             | 2678.0             | 3            | 6.335  | 0.5136 |
| RTPGRPTSSQSYEQNIK                     | 1950.1             | 2            | 2.7815 | 0.2707 |
| RTPLQHELPAWSERPPTFGTPLLQEAQAK         | 3300.7             | 3            | 5.1892 | 0.4169 |
| RTPLYDFHLAGGK                         | 1612.8             | 2            | 3.9249 | 0.3783 |
| RTPMGIVLDALEQQEEGINR                  | 2270.6             | 3            | 4.3432 | 0.3625 |
| RTPMGIVLDALEQQEEGINRLTDYISK           | 3091.5             | 3            | 4.5412 | 0.2103 |
| RTPMGLLLEALGQEQEAGS                   | 2001.3             | 2            | 3.1765 | 0.2731 |
| RTQAPTKASE                            | 1089.2             | 2            | 2.4057 | 0.2897 |
| RTQAVVSGR                             | 974.1              | 2            | 2.463  | 0.2122 |
| RTQEVLQAVAEK                          | 1372.6             | 2            | 3.1029 | 0.1707 |
| RTVDLSSHLAK                           | 1227.4             | 2            | 3.0221 | 0.2992 |
| RTVQSLEIDLDSMR                        | 1663.9             | 2            | 3.7616 | 0.3877 |
| RTYEEGLKHEANNPQLK                     | 2028.2             | 2            | 4.2973 | 0.4264 |
| RVAAALPGMESTQDR                       | 1602.8             | 2            | 3.5991 | 0.4099 |
| RVAEAHVPNFIFDEFR                      | 1948.2             | 3            | 3.9321 | 0.3252 |
| RVAEELALEQAKK                         | 1485.7             | 3            | 3.3053 | 0.1152 |
| RVAEELALEQAKKESEDQKR                  | 2358.6             | 3            | 5.7632 | 0.4162 |
| RVAGSVTELIQAAEAMK                     | 1775.1             | 2            | 4.2278 | 0.3678 |
| RVAPPEHPVLLTEAPLNPK                   | 2111.4             | 2            | 5.0584 | 0.209  |
| RVASGSPGEGISPQSAQAPQAPGDNHVVVPV       | 3008.3             | 3            | 4.9912 | 0.3411 |
| RVASGSPGEGISPQSAQAPQAPGDNHVVVPLR      | 3277.6             | 3            | 5.2668 | 0.3821 |
| RVATWFNQPAR                           | 1346.5             | 2            | 3.1165 | 0.3334 |
| RVDAENR                               | 859.9              | 1            | 1.9633 | 0.1142 |
| RVDFETFLPMLQAVAK                      | 1866.2             | 2            | 2.7613 | 0.2381 |
| RVDFHVDVQDYADNIK                      | 1836.0             | 2            | 2.9881 | 0.1279 |
| RVDFHVDVQDYADNIKAQLFETSSK             | 2828.0             | 3            | 4.1414 | 0.2132 |
| RVDIDFDENKVFDEQEEAAAAAAEPGPDPSEVDGLLR | 4146.3             | 3            | 4.6296 | 0.4153 |
| RVDIIPGFEFDR                          | 1464.7             | 2            | 2.4168 | 0.1684 |
| RVDIQNKR                              | 1029.2             | 2            | 2.8724 | 0.1213 |

| Peptide Sequence                    | Peptide mass (m/z) | Charge State | Xcorr  | DelCn2 |
|-------------------------------------|--------------------|--------------|--------|--------|
| RVEAAQETVADYQQTIKK                  | 2079.3             | 3            | 5.9034 | 0.4326 |
| RVEDVLGKGWENHVEGQK                  | 2081.3             | 3            | 3.7344 | 0.1482 |
| RVEEDIQQQKATGSEVSQR                 | 2189.3             | 3            | 3.8809 | 0.2519 |
| RVEEGEKEFHVR                        | 1515.7             | 3            | 3.3734 | 0.2572 |
| RVEELGDLAQAHIQQLSEAAGEDDHFLIR       | 3262.5             | 3            | 6.9766 | 0.4984 |
| RVEHGSLTR                           | 1112.2             | 2            | 3.0139 | 0.2215 |
| RVEHNQVGEK                          | 1196.3             | 2            | 3.2688 | 0.3371 |
| RVEIMEESEQ                          | 1379.5             | 2            | 2.9107 | 0.2102 |
| RVEIQMPKPAEAPTAPSPAQTLNENPAPVSQLQSR | 3857.3             | 3            | 7.1409 | 0.5172 |
| RVEISAPSNFEHR                       | 1542.7             | 3            | 3.9006 | 0.3226 |
| RVEPELADLQHWISYNEASSQLLR            | 3050.4             | 3            | 5.2338 | 0.4505 |
| RVEVNGEHATVR                        | 1367.5             | 3            | 3.2438 | 0.3277 |
| RVFITDDFHDMPK                       | 1753.0             | 2            | 3.6857 | 0.4075 |
| RVFQPSPLASQFELPGDFFNLTAEEIKR        | 3238.6             | 3            | 5.8943 | 0.3308 |
| RVGGVQSLGGTGALR                     | 1428.6             | 2            | 3.8091 | 0.2772 |
| RVGNGETPMIGDK                       | 1503.7             | 2            | 2.5616 | 0.1266 |
| RVHELER                             | 939.1              | 1            | 1.6787 | 0.1794 |
| RVHGPLSLLAPLPAAGK                   | 1698.0             | 2            | 3.3007 | 0.2523 |
| RVHLMNPMVPGLTGSK                    | 1738.1             | 3            | 3.837  | 0.3558 |
| RVHPALDTYIK                         | 1313.5             | 2            | 2.8994 | 0.1921 |
| RVHVTQEDFEMAVAK                     | 1761.0             | 3            | 5.4426 | 0.4186 |
| RVIAANNR                            | 914.0              | 2            | 2.9169 | 0.1998 |
| RVIISAPSADAPMFVMGVNHEK              | 2370.8             | 2            | 5.9663 | 0.4547 |
| RVIISAPSADAPMFVMGVNHEKYDNSLK        | 3091.6             | 3            | 6.443  | 0.419  |
| RVLDGLHNELQTIGFQIETIGK              | 2482.8             | 3            | 5.2914 | 0.4324 |
| RVLGLVLLR                           | 1039.3             | 2            | 2.9472 | 0.1987 |
| RVLIAAHGNSLR                        | 1307.5             | 2            | 4.1694 | 0.394  |
| RVLLGETGKEK                         | 1230.4             | 3            | 3.8134 | 0.2577 |
| RVLQALEGLK                          | 1127.4             | 2            | 2.7857 | 0.2557 |
| RVLYPRVVSIAEVGIR                    | 1828.2             | 2            | 3.1951 | 0.1232 |
| RVMVDANEVPIQK                       | 1499.8             | 2            | 3.1902 | 0.161  |
| RVNAIEHVIIPR                        | 1417.7             | 2            | 3.9317 | 0.302  |
| RVNLSMHLR                           | 1354.6             | 2            | 3.4404 | 0.2845 |
| RVNKEESLQMQRVQDILEQNEALK            | 2744.1             | 3            | 3.7005 | 0.15   |
| RVNQAIWLLCTGAR                      | 1601.9             | 2            | 4.6131 | 0.4569 |
| RVPANYADGVYQALEEPQLPNPR             | 2598.9             | 2            | 4.3036 | 0.3227 |

| Peptide Sequence                   | Peptide mass (m/z) | Charge State | Xcorr  | DelCn2 |
|------------------------------------|--------------------|--------------|--------|--------|
| RVPATTLIAHFEQANIK                  | 1960.2             | 3            | 4.601  | 0.2941 |
| RVPDITECKEEDIMCMYEAEMQWK           | 2979.4             | 3            | 4.2441 | 0.2985 |
| RVPFSLLR                           | 988.2              | 2            | 2.67   | 0.1166 |
| RVPGSPTNLANR                       | 1282.4             | 2            | 3.0871 | 0.3289 |
| RVPGSSGR                           | 815.9              | 2            | 2.4339 | 0.1164 |
| RVPKVTGDARSAFRPLR                  | 1927.2             | 2            | 2.7487 | 0.1996 |
| RVPPPALS                           | 993.2              | 2            | 2.6156 | 0.1533 |
| RVPQAKPVAVEEK                      | 1451.7             | 2            | 3.6124 | 0.3047 |
| RVPVLGSLLNLPGIR                    | 1605.0             | 2            | 3.675  | 0.2957 |
| RVQANMGAK                          | 975.2              | 2            | 2.5178 | 0.1042 |
| RVQDPLAELVKIEPK                    | 1736.0             | 3            | 4.4134 | 0.3061 |
| RVQLAEDLKK                         | 1200.4             | 3            | 3.6915 | 0.2401 |
| RVQVAEHPR                          | 1092.2             | 2            | 3.0459 | 0.2523 |
| RVSGHYVTSAAAK                      | 1347.5             | 2            | 3.0442 | 0.2664 |
| RVSHQGYSTAEFEPR                    | 2023.1             | 3            | 4.6656 | 0.3975 |
| RVSVWPVAFVGGRLRYEAPRVNGAGKVVR      | 3041.5             | 3            | 3.5107 | 0.1641 |
| RVTNDARENEMDENLEQVSGIIGNLR         | 2974.2             | 3            | 4.1377 | 0.235  |
| RVTNVGSLLLTPQENESLFTFLGK           | 2665.0             | 3            | 5.3111 | 0.3104 |
| RVTNVGSLLLTPQENESLFTFLGKK          | 2793.2             | 3            | 3.8332 | 0.1954 |
| RVVHASGDASYSAGDSGDAAAQPAFTGIK      | 2808.0             | 3            | 6.3432 | 0.4899 |
| RVVHFAEPGAGTK                      | 1369.6             | 2            | 3.7189 | 0.1791 |
| RVVLVTSGGTK                        | 1117.3             | 2            | 2.4197 | 0.2362 |
| RVVPSDLYPLVLGFLR                   | 1845.2             | 2            | 3.9405 | 0.289  |
| RVYATILNAGTNTDGFKEQGVTFPSGDIQEQLIR | 3741.1             | 3            | 6.5495 | 0.5473 |
| RVYGSFLVNPESGYNVSLLYDLENLPASK      | 3246.6             | 3            | 4.0351 | 0.3467 |
| RWEEVQSYIR                         | 1366.5             | 2            | 2.7604 | 0.1995 |
| RWEVADLQPQLK                       | 1483.7             | 2            | 3.3537 | 0.1289 |
| RWFHPNITGVEAENLLLTR                | 2267.6             | 3            | 5.5022 | 0.4213 |
| RWHWSSGSLVSYK                      | 1593.8             | 2            | 2.9181 | 0.1334 |
| RWLPAGDALLQMITIHLPSVTAQK           | 2758.3             | 3            | 5.5569 | 0.402  |
| RYAGLKPGEPTCESLKDTIAR              | 2419.8             | 3            | 4.1566 | 0.3548 |
| RYDDPEVQK                          | 1150.2             | 2            | 3.0007 | 0.1838 |
| RYDDPEVQKDIK                       | 1506.6             | 2            | 4.0126 | 0.3474 |
| RYDSNSGGER                         | 1141.1             | 2            | 2.8749 | 0.2064 |
| RYEPIQATPPPPPLPSQYAQPSQPVTASLHIHSK | 3822.3             | 3            | 4.9742 | 0.309  |
| RYEQEHAAIQDK                       | 1488.6             | 2            | 3.2599 | 0.2426 |

| Peptide Sequence                | Peptide mass (m/z) | Charge State | Xcorr  | DelCn2 |
|---------------------------------|--------------------|--------------|--------|--------|
| RYESHPCADLQAK                   | 1617.8             | 2            | 3.4538 | 0.2165 |
| RYETLVGTIGKK                    | 1365.6             | 2            | 3.0969 | 0.2163 |
| RYEVPLETPHVHSR                  | 1720.9             | 3            | 4.5876 | 0.4162 |
| RYGGGGYGR                       | 943.0              | 2            | 2.8773 | 0.3253 |
| RYIAGGAGIR                      | 1034.2             | 2            | 2.674  | 0.1016 |
| RYILPDEPAIIVHPNWAAK             | 2204.6             | 3            | 3.9668 | 0.2682 |
| RYINMLTRPR                      | 1320.6             | 3            | 3.3741 | 0.2499 |
| RYKVPDGKPENEFNAEFK              | 2387.6             | 3            | 3.8955 | 0.3356 |
| RYLSAQKPLLNDGQFR                | 1907.2             | 2            | 4.6998 | 0.3868 |
| RYNEDLELEDAIHTAILTK             | 2358.6             | 3            | 6.507  | 0.4855 |
| RYNGGVGR                        | 879.0              | 2            | 2.9624 | 0.2388 |
| RYNIPHGPVVGSTR                  | 1553.8             | 2            | 3.344  | 0.3597 |
| RYPEEFALR                       | 1181.3             | 2            | 2.7188 | 0.2183 |
| RYPSSISSPQK                     | 1337.5             | 2            | 3.5315 | 0.1983 |
| RYQEALHLGSQLLR                  | 1684.9             | 2            | 3.8216 | 0.3477 |
| RYQEIEEDRKKAELEGVAVTAPR         | 2689.0             | 3            | 4.6058 | 0.476  |
| RYTIAALLSPYSYSTTAVVTNPK         | 2517.9             | 3            | 5.5614 | 0.4906 |
| RYTIAALLSPYSYSTTAVVTNPK         | 2647.0             | 3            | 6.179  | 0.5287 |
| RYTLNVLSDLGEGEKVNDEIIK          | 2620.0             | 3            | 3.3909 | 0.1883 |
| RYTSLNHLAQAAR                   | 1501.7             | 2            | 2.7307 | 0.2269 |
| SAAASNLSGLSLQEAQQILNVSK         | 2330.6             | 3            | 5.1421 | 0.4764 |
| SAADDSEAKSNELTR                 | 1594.6             | 2            | 4.4837 | 0.3715 |
| SAADIALAR                       | 1001.2             | 2            | 3.7069 | 0.2576 |
| SAADLISQAR                      | 1032.1             | 2            | 3.701  | 0.2967 |
| SAADSISESVPVGP                  | 1444.6             | 2            | 3.8644 | 0.4685 |
| SAAEMYGSSFDLDYDFQR              | 2103.2             | 2            | 6.0007 | 0.573  |
| SAAEMYGSSFDLDYDFQRDYDR          | 2815.9             | 3            | 4.3568 | 0.4389 |
| SAAEMYGSVTEHPSPSPLLSSSFDLDYDFQR | 3435.7             | 3            | 4.5463 | 0.2951 |
| SAAETVTK                        | 806.9              | 1            | 2.5519 | 0.1644 |
| SAAETVTKGGIMLPEK                | 1632.9             | 3            | 4.8032 | 0.2899 |
| SAAETVTKGGIMLPEKSQGK            | 2033.3             | 2            | 4.6105 | 0.379  |
| SAAILEYLTAEVLELAGNASK           | 2164.4             | 3            | 6.0894 | 0.3679 |
| SAALQSTQSQEEFKLEDLKKLEPILK      | 2975.4             | 3            | 3.6542 | 0.1356 |
| SAAMLGNSDHTALSR                 | 1660.8             | 2            | 4.4371 | 0.3969 |
| SAAPGGGSVAAAAAAMGAALGSMVGLMTYGR | 2726.2             | 3            | 3.7617 | 0.339  |
| SAAPSTLDSSTAPAQLGK              | 1789.9             | 2            | 4.8957 | 0.4411 |

| Peptide Sequence                  | Peptide mass (m/z) | Charge State | Xcorr  | DelCn2 |
|-----------------------------------|--------------------|--------------|--------|--------|
| SAAPSTLDSSTAPAQLGKK               | 1918.1             | 2            | 5.3911 | 0.4035 |
| SAAQAAQNTNSNAAGK                  | 1461.5             | 2            | 5.1237 | 0.497  |
| SAAREDDSIKPFKETSDEEIHDLHQR        | 3182.4             | 3            | 3.9729 | 0.367  |
| SAASVYAGAGGSGSR                   | 1298.3             | 2            | 4.3594 | 0.4422 |
| SAATLITHPFHVITLR                  | 1778.1             | 3            | 3.9131 | 0.3589 |
| SAATSGAGSTTSGVVSGSLGSR            | 1898.0             | 2            | 5.1679 | 0.5407 |
| SAAYERLENTEDIIEVEQHIQTIK          | 2847.0             | 3            | 4.4355 | 0.2107 |
| SACGNCYLGDAFR                     | 1377.5             | 2            | 2.5747 | 0.115  |
| SADEPMTTFVVCNECGNR                | 1974.2             | 2            | 2.5434 | 0.1177 |
| SADFTNFDPR                        | 1170.2             | 2            | 3.2784 | 0.3254 |
| SADFVVEAIGDDVGTGLGFSVEGPSQAK      | 2696.9             | 2            | 3.3202 | 0.283  |
| SADFVVEISIGSEVGLGFAIEGPSQAK       | 2682.9             | 3            | 6.2109 | 0.4925 |
| SADGVIVSGVKDVFDDFFEHK             | 2322.5             | 3            | 5.0212 | 0.4131 |
| SADIALVAGGSR                      | 1117.2             | 2            | 3.6838 | 0.2684 |
| SADLPAIISTWQELR                   | 1700.9             | 2            | 4.1453 | 0.3858 |
| SADTLWDIQK                        | 1177.3             | 2            | 3.0296 | 0.1445 |
| SADTLWDIQKDLK                     | 1533.7             | 2            | 2.8514 | 0.1131 |
| SADTLWDIQKDLKDL                   | 1762.0             | 2            | 2.719  | 0.1196 |
| SADTLWGIQK                        | 1119.3             | 1            | 3.2937 | 0.3085 |
| SADTLWGIQKELQF                    | 1636.8             | 2            | 3.71   | 0.3571 |
| SADTQSISR                         | 965.0              | 2            | 3.0931 | 0.1337 |
| SADVEKLADELHMPSLPEMMFGDNVLR       | 3046.5             | 3            | 5.4343 | 0.3522 |
| SADWLGLFAPHHGPPR                  | 1759.0             | 3            | 3.658  | 0.3013 |
| SAEAAAQAEEEDLRASLLAVLSR           | 2343.6             | 3            | 3.2208 | 0.1576 |
| SAEAAAQATK                        | 949.0              | 2            | 3.1185 | 0.2988 |
| SAEAAAQATKNMEAGAGR                | 1735.9             | 2            | 5.1361 | 0.4316 |
| SAEAEQLSK                         | 963.0              | 2            | 2.9076 | 0.1183 |
| SAEAILKR                          | 888.0              | 2            | 2.4588 | 0.1627 |
| SAEDLDKLRNDGYLMFQQVPMVEIDGMK      | 3244.7             | 3            | 6.2543 | 0.4659 |
| SAEDLDKLRNDGYLMFQQVPMVEIDGMKLVQTR | 3842.4             | 3            | 5.0336 | 0.3183 |
| SAEDSFTGFVR                       | 1216.3             | 2            | 3.2798 | 0.3323 |
| SAEEEEADLPTKPTK                   | 1587.7             | 2            | 4.4785 | 0.3564 |
| SAEETFQLSR                        | 1168.2             | 2            | 2.9501 | 0.2736 |
| SAEFLHMLK                         | 1189.5             | 2            | 3.4927 | 0.3375 |
| SAEFPDFYDSEEPVSTHQAENEKDR         | 3058.1             | 3            | 4.3371 | 0.2829 |
| SAEHTLVDMVQLLFTR                  | 1861.2             | 2            | 3.2341 | 0.2048 |

| Peptide Sequence                         | Peptide mass (m/z) | Charge State | Xcorr  | DelCn2 |
|------------------------------------------|--------------------|--------------|--------|--------|
| SAEIDSDDTGGSAAQK                         | 1552.5             | 2            | 5.6417 | 0.4618 |
| SAEKEISLWFKPEELVDYK                      | 2312.6             | 3            | 4.8269 | 0.4457 |
| SAELAAALLSIYMERAEDLPLR                   | 2433.8             | 3            | 5.1163 | 0.4307 |
| SAELAAALLSIYMERAEDLPLRK                  | 2562.0             | 3            | 4.5674 | 0.3074 |
| SAEPNALAFAAGETFLVLER                     | 2107.4             | 2            | 3.994  | 0.4051 |
| SAEPSPTVMSTSLGSNLSELDL                   | 2279.5             | 2            | 4.5284 | 0.4876 |
| SAEQQPSEKSTEPK                           | 1546.6             | 2            | 3.4287 | 0.2356 |
| SAESQGRSEILMSLQKVLSSGLGGAAASSHRDIYK      | 3549.0             | 3            | 3.3016 | 0.1533 |
| SAFEEEGKETADITHALSK                      | 2064.2             | 3            | 3.2103 | 0.1358 |
| SAFEEEGKETADITHALSKLTPASVPIHK            | 3237.6             | 3            | 4.1614 | 0.1788 |
| SAFLQAFLGR                               | 1110.3             | 2            | 3.8718 | 0.3227 |
| SAFPFSDKLGELSDKIGSTIDDTISK               | 2773.0             | 3            | 3.8694 | 0.3415 |
| SAFPFSDKLGELSDKIGSTIDDTISKFR             | 3076.4             | 3            | 4.6001 | 0.4287 |
| SAFSNLFGGEPLSYTR                         | 1746.9             | 2            | 4.5729 | 0.3974 |
| SAGEEEDGPVLTDEQK                         | 1704.7             | 2            | 4.57   | 0.3546 |
| SAGFHPSGSVLAVGTVTGR                      | 1801.0             | 2            | 4.5473 | 0.3995 |
| SAGHHLIPVKENLVDK                         | 1758.0             | 2            | 3.8196 | 0.1671 |
| SAGIKVIMVTGDHPITAK                       | 1839.2             | 2            | 4.9274 | 0.3501 |
| SAGKYDVYLINPQ GK                         | 1653.9             | 2            | 4.3021 | 0.3667 |
| SAGLAFSLYQAMAK                           | 1458.7             | 2            | 4.3018 | 0.3874 |
| SAGLAFSLYQAMAKDQAVENILVSPVVVASSLGLVSLGGK | 3992.6             | 3            | 4.7944 | 0.3896 |
| SAGLEQPTDPVAR                            | 1341.5             | 2            | 3.5129 | 0.1619 |
| SAGLPSHSSVISQHSK                         | 1622.8             | 2            | 3.9572 | 0.4877 |
| SAGSALYASR                               | 983.1              | 2            | 3.4514 | 0.364  |
| SAGSRIEDGVPQHLVVLVGGK                    | 2133.4             | 2            | 4.2192 | 0.2772 |
| SAGTVELDDQIQANLPDEQVLSEEEIDENFK          | 3477.6             | 3            | 4.8386 | 0.3107 |
| SAGTVELDDQIQANLPDEQVLSEEEIDENFKALFR      | 3965.2             | 3            | 5.4451 | 0.3771 |
| SAGVDQNHR                                | 1081.1             | 2            | 3.0539 | 0.24   |
| SAHAGTYEVR                               | 1091.2             | 2            | 3.2329 | 0.3971 |
| SAHATAPVNIAGSR                           | 1352.5             | 2            | 3.6443 | 0.4853 |
| SAHGYYAAHPSSTK                           | 1427.5             | 2            | 3.7607 | 0.4665 |
| SAHLTNPWNEHKPVK                          | 1759.0             | 2            | 3.5947 | 0.3602 |
| SAHQVAR                                  | 768.8              | 1            | 1.9006 | 0.1271 |
| SAHSIAQLQK                               | 1083.2             | 2            | 2.6515 | 0.1941 |
| SAHVNSLAQDETKLK                          | 1641.8             | 2            | 4.5331 | 0.4092 |
| SAIDLEEMASGLNK                           | 1478.7             | 2            | 3.709  | 0.177  |

| Peptide Sequence                   | Peptide mass (m/z) | Charge State | Xcorr  | DelCn2 |
|------------------------------------|--------------------|--------------|--------|--------|
| SAIEAELEKVAHQQLALR                 | 2007.3             | 3            | 5.276  | 0.3823 |
| SAINEVVTR                          | 989.1              | 2            | 3.3731 | 0.2096 |
| SAIQANDHHPR                        | 1246.3             | 2            | 3.2109 | 0.2102 |
| SAIRDNNPVVVLENELMYGVVPEFPPEAQS     | 3491.9             | 3            | 4.9373 | 0.3633 |
| SAIVHLINYQDDAELATR                 | 2030.2             | 2            | 5.2281 | 0.4416 |
| SAIYGFQDQSNLR                      | 1428.5             | 2            | 4.0535 | 0.4344 |
| SAIQLEEEYENLLK                     | 1843.0             | 2            | 5.5216 | 0.4398 |
| SAKDSLAWLSLVKEELGDEWLKPELFR        | 3161.6             | 3            | 4.5343 | 0.2536 |
| SAKGEEVDVAR                        | 1161.2             | 2            | 3.6216 | 0.26   |
| SAKGEEVDVARAER                     | 1517.6             | 2            | 2.8094 | 0.1365 |
| SAKKDKDPVVK                        | 1230.4             | 2            | 2.5789 | 0.1124 |
| SAKPGDDVRER                        | 1230.3             | 2            | 2.9356 | 0.143  |
| SAKPTKPAASDLPVPAEGVR               | 1992.3             | 2            | 5.3424 | 0.4285 |
| SALALQHRPVVLFGLAGTAPK              | 2262.6             | 3            | 6.4799 | 0.5077 |
| SALALVTGAGSGIGR                    | 1330.5             | 2            | 4.6663 | 0.2592 |
| SALDTAAR                           | 804.9              | 2            | 2.438  | 0.1622 |
| SALEDKERDEDEDGDGDGDGATGK           | 2597.5             | 3            | 5.6417 | 0.2475 |
| SALENIVFAVTR                       | 1320.5             | 2            | 3.7105 | 0.3643 |
| SALFAQINQGESITHALK                 | 1929.2             | 2            | 4.8559 | 0.4039 |
| SALFAQINQGESITHALKHVSDDMK          | 2742.1             | 3            | 3.9198 | 0.2081 |
| SALGHALPVAAPGAR                    | 1388.6             | 2            | 3.3295 | 0.2077 |
| SALLPVLHHK                         | 1115.4             | 2            | 2.7803 | 0.2782 |
| SALPYSSFSSDQGLGESSAAPSQPITAVK      | 2884.1             | 3            | 3.8378 | 0.1008 |
| SALQAIGVEAHQAVMIGDDIVGDVGGAAQR     | 2879.2             | 3            | 4.4509 | 0.3467 |
| SALQSINWAAQTDDGKLPEVTK             | 2488.7             | 3            | 3.4653 | 0.3168 |
| SALQSINWAAQTDDGKLPEVTKDVER         | 2988.3             | 3            | 5.1697 | 0.3538 |
| SALRDSALNLFNDPMWNQQWYLQDTR         | 3184.5             | 3            | 4.9906 | 0.4277 |
| SALSGHLETVILGLLK                   | 1652.0             | 3            | 5.3953 | 0.4519 |
| SALSGHLETVILGLLKTPAQYDASELK        | 2856.3             | 2            | 4.8225 | 0.3309 |
| SALTIQLIQNHVDEYDPTIEDSYRK          | 3097.4             | 3            | 5.5937 | 0.3453 |
| SALTVQFVQGIFVEK                    | 1666.9             | 2            | 2.6265 | 0.1117 |
| SALWDSGLDYLHGTGHGVGSFLNVHEGPCGISYK | 3575.9             | 3            | 3.7148 | 0.1769 |
| SALYSPSDPLTLLQADTVR                | 2048.3             | 3            | 4.7543 | 0.4693 |
| SALYYVDLIGGK                       | 1299.5             | 2            | 3.3665 | 0.2918 |
| SAMMYIQELR                         | 1242.5             | 2            | 3.2863 | 0.1755 |
| SAMPFTASPASSTAR                    | 1583.7             | 2            | 3.6717 | 0.372  |

| Peptide Sequence                | Peptide mass (m/z) | Charge State | Xcorr  | DelCn2 |
|---------------------------------|--------------------|--------------|--------|--------|
| SANAEDAQEFSDVER                 | 1668.7             | 2            | 4.5359 | 0.4051 |
| SANFLDHLYVGIPR                  | 1602.8             | 2            | 3.7689 | 0.2822 |
| SANFLDHLYVGIPRPSGEK             | 2101.4             | 3            | 5.5741 | 0.4781 |
| SANLVAATLGAILNR                 | 1484.7             | 3            | 4.5926 | 0.3508 |
| SANPAMQLDR                      | 1103.2             | 2            | 2.8828 | 0.1777 |
| SANPAVSKDFSSHDEINNYLQQIDQLKER   | 3348.6             | 3            | 5.3304 | 0.3683 |
| SANPPHTIQASEEQSSTPAPVKK         | 2405.6             | 3            | 4.8609 | 0.487  |
| SANPQDHPVIQPNYLSTETDIEDFR       | 2888.1             | 3            | 4.7431 | 0.3806 |
| SANSELGGIWSVGQR                 | 1561.7             | 2            | 4.3423 | 0.4004 |
| SANSNPAMAPR                     | 1116.2             | 2            | 3.2479 | 0.217  |
| SANTQVVR                        | 875.0              | 1            | 1.7819 | 0.1098 |
| SAPELKTGISDVFAKNDLAVVDVR        | 2545.9             | 3            | 5.6492 | 0.4746 |
| SAPEPKPEENPASK                  | 1609.8             | 2            | 3.5906 | 0.3116 |
| SAPGGGSKVPQKK                   | 1241.4             | 2            | 2.6197 | 0.1857 |
| SAPLIADQAVLQLLPK                | 1678.0             | 2            | 5.0208 | 0.3331 |
| SAPSIPKENFSCLTR                 | 1650.9             | 2            | 2.6012 | 0.1485 |
| SAPYEFPEESPIEQLEER              | 2151.3             | 2            | 4.4971 | 0.4117 |
| SAQAAPEPR                       | 927.0              | 2            | 2.4035 | 0.1612 |
| SAQPASAEPR                      | 1014.1             | 2            | 3.0335 | 0.2868 |
| SAQPIEKFVTDIDELGKDLLLK          | 2473.8             | 3            | 3.6543 | 0.1802 |
| SAQPLPLKIEELALAK                | 1722.1             | 2            | 3.1721 | 0.3606 |
| SASASHQADIK                     | 1115.2             | 2            | 2.741  | 0.2393 |
| SASHAVPASK                      | 955.1              | 2            | 2.8104 | 0.3962 |
| SASHAVPASKK                     | 1083.2             | 2            | 2.5038 | 0.1942 |
| SASIKDIKK                       | 990.2              | 2            | 2.7366 | 0.1477 |
| SASLHLPK                        | 853.0              | 2            | 2.9215 | 0.1766 |
| SASLISQAEHSLKENDHAR             | 2094.2             | 3            | 4.3019 | 0.406  |
| SASPDDDLGSSNWEAADLGNEER         | 2436.4             | 2            | 5.1852 | 0.5676 |
| SASSGAEGDVSSSEREP               | 1565.5             | 2            | 4.3055 | 0.3666 |
| SASSLHETK                       | 960.0              | 2            | 2.5609 | 0.2002 |
| SASSTNLKDILADLIPKEQAR           | 2271.6             | 3            | 5.3511 | 0.4082 |
| SASYKPVFVTEITDDLHFVYQDVETGTQLEK | 3561.9             | 3            | 5.9357 | 0.4573 |
| SATDGNTSTTPPTSAK                | 1536.6             | 2            | 3.1531 | 0.3899 |
| SATDVKVTADMVKEALEEAEKAQVAAEK    | 2963.3             | 3            | 4.1392 | 0.2159 |
| SATEHVQGHLGK                    | 1264.4             | 2            | 2.9759 | 0.2472 |
| SATEQSGTGIR                     | 1107.2             | 2            | 2.9183 | 0.2591 |



| Peptide Sequence                        | Peptide mass (m/z) | Charge State | Xcorr  | DelCn2 |
|-----------------------------------------|--------------------|--------------|--------|--------|
| SATEYKNEEYQR                            | 1518.6             | 2            | 2.5551 | 0.285  |
| SATGKEVLQNLGPK                          | 1442.6             | 2            | 3.8347 | 0.2315 |
| SATKVTADVINAAEK                         | 1518.7             | 2            | 4.2992 | 0.33   |
| SATKVTADVINAAEKLQVVGR                   | 2171.5             | 3            | 4.3908 | 0.1753 |
| SATLASIDAELQK                           | 1347.5             | 2            | 3.1957 | 0.2567 |
| SATSSSVSNVVITK                          | 1380.5             | 2            | 2.4653 | 0.1159 |
| SATVTRLEDLLQDAQDEKEQLNEYKGHLSGLAK       | 3702.0             | 3            | 5.1278 | 0.3493 |
| SATYVNTEGR                              | 1098.1             | 2            | 3.176  | 0.4432 |
| SAVADKHELLSLASSNHLGK                    | 2078.3             | 3            | 6.2336 | 0.5197 |
| SAVEAERLVAGK                            | 1230.4             | 2            | 3.5676 | 0.2199 |
| SAVEAQNEVTENPK                          | 1516.6             | 2            | 4.6105 | 0.2524 |
| SAVEAQNEVTENPKQK                        | 1772.9             | 2            | 5.5606 | 0.3946 |
| SAVGNAAHTSDR                            | 1186.2             | 2            | 3.5682 | 0.4104 |
| SAVLISSKPGCFIAGADINMLAACKTLQEVTQLSQEAQR | 4094.7             | 3            | 4.7659 | 0.2511 |
| SAVLQEAR                                | 874.0              | 1            | 2.4248 | 0.1401 |
| SAVLSEPVFLKLPSTAYAPEGSPILMPAYTR         | 3307.8             | 3            | 6.2237 | 0.4235 |
| SAVNTEEEKK                              | 1135.2             | 2            | 2.5124 | 0.2526 |
| SAVPPGADKKAEGAGSATEFQFR                 | 2393.6             | 2            | 4.8354 | 0.2912 |
| SAVRPASLNLNR                            | 1298.5             | 2            | 2.9927 | 0.2527 |
| SAVTTVVNPK                              | 1016.2             | 2            | 3.2535 | 0.2634 |
| SAVTTVVNPKYEGK                          | 1493.7             | 2            | 3.2189 | 0.2661 |
| SAWLSGYENPVVSR                          | 1565.7             | 2            | 4.4352 | 0.4342 |
| SAYDSTMETMNYAQIR                        | 1882.1             | 2            | 5.2421 | 0.4435 |
| SAYEFSETESMLK                           | 1522.7             | 2            | 3.9297 | 0.456  |
| SAYFAEK                                 | 815.9              | 1            | 1.9544 | 0.2293 |
| SAYGGLTSPGLSYSLSGSSFGSGAGSSSFSR         | 2833.0             | 2            | 5.2346 | 0.3166 |
| SAYGGPVGAGIR                            | 1105.2             | 2            | 3.1827 | 0.453  |
| SAYKIVSGEAEVETPENLQDFVGKPVFTVER         | 3627.0             | 3            | 4.7308 | 0.2167 |
| SAYQTIDSAEAPADPFVPEGR                   | 2293.4             | 2            | 4.9528 | 0.4654 |
| SCREAEGLAHPGDTGAR                       | 1727.8             | 2            | 2.5054 | 0.1784 |
| SDAEEDGGTVSQEEEDRKPK                    | 2207.2             | 3            | 3.3079 | 0.2649 |
| SDALETLGFLNHYQMK                        | 1868.1             | 2            | 4.4388 | 0.4312 |
| SDALETLGFLNHYQMKNPNPYPYTLK              | 3113.5             | 3            | 4.1901 | 0.1643 |
| SDALNSAIDK                              | 1034.1             | 2            | 2.762  | 0.1314 |
| SDALNSAIDKMTK                           | 1394.6             | 2            | 3.4294 | 0.2397 |
| SDDELDDFFHDQSTATSQAGTLSSIPTALTR         | 3441.6             | 3            | 4.5548 | 0.3432 |

| Peptide Sequence               | Peptide mass (m/z) | Charge State | Xcorr  | DelCn2 |
|--------------------------------|--------------------|--------------|--------|--------|
| SDDEVDDPAVELK                  | 1432.5             | 2            | 3.8369 | 0.2559 |
| SDDKVTLEER                     | 1192.3             | 2            | 3.1676 | 0.1643 |
| SDEKDKEGEALEVK                 | 1692.8             | 2            | 4.5515 | 0.2666 |
| SDEKDKEGEALEVKENSGYLK          | 2484.6             | 3            | 5.2158 | 0.3129 |
| SDEKAAVAGK                     | 976.1              | 1            | 2.6368 | 0.1532 |
| SDEKAAVAGKKPVVGK               | 1584.8             | 2            | 4.1997 | 0.3363 |
| SDEKAAVAGKKPVVGKK              | 1713.0             | 2            | 5.1632 | 0.4157 |
| SDEMNVK                        | 822.9              | 2            | 3.0025 | 0.2122 |
| SDFGKFLSSGK                    | 1272.4             | 2            | 3.7108 | 0.282  |
| SDFQVNLNNASR                   | 1365.4             | 2            | 4.2326 | 0.2368 |
| SDFYDIVLVATPLNR                | 1724.0             | 2            | 4.3182 | 0.3681 |
| SDGIYIINLK                     | 1136.3             | 2            | 3.0367 | 0.1547 |
| SDGSLEDGDDVHR                  | 1402.4             | 2            | 2.7513 | 0.1309 |
| SDGTETSTNLHQK                  | 1418.4             | 2            | 3.3994 | 0.2916 |
| SDHLIQTDTVNLHR                 | 1649.8             | 2            | 3.1795 | 0.2109 |
| SDIAVPIPK                      | 940.1              | 2            | 3.1201 | 0.195  |
| SDIAVPIPKDHQVLIK               | 1774.1             | 2            | 3.1879 | 0.1934 |
| SDIDEIVLVGGSTR                 | 1461.6             | 2            | 3.8288 | 0.3768 |
| SDIGEIVLVGGMTR                 | 1447.7             | 2            | 4.3228 | 0.3248 |
| SDILGHLR                       | 911.0              | 2            | 2.4814 | 0.2355 |
| SDKDLETQVIQLNEQVHSLK           | 2325.6             | 3            | 5.0721 | 0.3931 |
| SDKKPDREEIQMSNMGSNTK           | 2296.5             | 3            | 3.4198 | 0.178  |
| SDKMNIFGGFR                    | 1272.5             | 2            | 3.3693 | 0.3299 |
| SDKNNEFIVIHNGIITNYK            | 2220.5             | 3            | 3.8709 | 0.3405 |
| SDKNNEFIVIHNGIITNYKDLK         | 2576.9             | 3            | 5.0693 | 0.3755 |
| SDKNNEFIVIHNGIITNYKDLKK        | 2705.1             | 3            | 5.8641 | 0.4509 |
| SDKSPDLAPTPAPQSTPR             | 1866.0             | 2            | 4.5334 | 0.4581 |
| SDKVPDNKNTHTLLLAGVFR           | 2226.5             | 3            | 3.8409 | 0.4447 |
| SDKWIDIHNPATNEVIGR             | 2066.3             | 3            | 3.4096 | 0.1758 |
| SDLAVPSELALLK                  | 1356.6             | 2            | 3.2343 | 0.2493 |
| SDLLLSGRDWNTLIVGK              | 1888.2             | 3            | 3.2704 | 0.1439 |
| SDLQMAVLSFEKDDDHNGHIDFITAASNLR | 3361.6             | 3            | 6.2729 | 0.4423 |
| SDLYSSGR                       | 884.9              | 2            | 2.6999 | 0.1997 |
| SDMLKDIIKEYTDVYPEIIER          | 2571.9             | 3            | 4.8996 | 0.42   |
| SDPFLEFFR                      | 1158.3             | 2            | 3.2293 | 0.3229 |
| SDPIQEIRDLAIEITTLDR            | 2086.3             | 3            | 3.9945 | 0.258  |

| Peptide Sequence                          | Peptide mass (m/z) | Charge State | Xcorr  | DelCn2 |
|-------------------------------------------|--------------------|--------------|--------|--------|
| SDPLLIGIPTSENPFK                          | 1729.0             | 2            | 3.1656 | 0.2651 |
| SDPLLIGIPTSENPFKDKK                       | 2100.4             | 2            | 3.6649 | 0.2956 |
| SDPNRETDDLVLVLSFVGQTR                     | 2251.4             | 3            | 3.7888 | 0.1304 |
| SDPPQEAQAQFTSQVILNHPGQISAGYSPVIDCHTAHIACK | 4346.9             | 3            | 4.7355 | 0.3867 |
| SDQVNGVLVLSLLDK                           | 1600.8             | 2            | 4.4955 | 0.3334 |
| SDRIEPLTFYLDLPQWQLALNPSEK                 | 2890.2             | 3            | 4.2658 | 0.2176 |
| SDRPELTGAK                                | 1074.2             | 2            | 2.9887 | 0.2822 |
| SDRQQFLGHMR                               | 1375.5             | 2            | 2.5329 | 0.2072 |
| SDSDKSSSQVPPILQETDKSK                     | 2277.4             | 3            | 4.169  | 0.3071 |
| SDSFENPVLQQHFR                            | 1704.8             | 2            | 3.8451 | 0.4935 |
| SDSHGPKEDGGFRHSEAFEALQQK                  | 2658.8             | 3            | 4.0209 | 0.313  |
| SDSHPSDALTR                               | 1186.2             | 2            | 2.5774 | 0.2426 |
| SDSKALDLLDR                               | 1233.4             | 2            | 2.5417 | 0.194  |
| SDSRAQAVSEDAAGNEGR                        | 1806.8             | 2            | 2.9    | 0.1627 |
| SDTSFMFQR                                 | 1119.2             | 2            | 3.3155 | 0.2871 |
| SDTSGDYEITLLK                             | 1442.6             | 2            | 3.646  | 0.2946 |
| SDTSGHFER                                 | 1036.0             | 2            | 2.7741 | 0.2075 |
| SDVAAKGQDEESLSSSKR                        | 1895.0             | 2            | 3.6183 | 0.222  |
| SDVDLYQVR                                 | 1095.2             | 2            | 2.8004 | 0.1844 |
| SDVEAIFSKYGK                              | 1344.5             | 2            | 3.3089 | 0.2111 |
| SDVLELTDNDFESR                            | 1640.7             | 2            | 5.4639 | 0.4604 |
| SDVLVEYQGEGR                              | 1352.4             | 2            | 4.2704 | 0.3197 |
| SDVQIHVPTFTFR                             | 1547.7             | 3            | 3.5463 | 0.354  |
| SDVYCEVCEFLVK                             | 1534.8             | 2            | 2.7498 | 0.1245 |
| SDYAQLLEDMQNAFR                           | 1802.0             | 2            | 4.7496 | 0.3604 |
| SDYDGIGNR                                 | 997.0              | 2            | 2.4135 | 0.1072 |
| SDYINASPIIHDPR                            | 1727.9             | 2            | 3.7584 | 0.3804 |
| SDYLNTFEFMDK                              | 1510.6             | 2            | 3.5338 | 0.3674 |
| SDYLNTFEFMDKLGENLK                        | 2165.4             | 2            | 4.2375 | 0.3723 |
| SDYLNTFEFMDKLGENLKIK                      | 2406.7             | 3            | 3.9996 | 0.3155 |
| SEAANGNLDFVLSFLK                          | 1725.9             | 2            | 2.475  | 0.1325 |
| SEADSDKNATILELR                           | 1662.8             | 2            | 3.3014 | 0.3268 |
| SEAEAAITSFNGHKPPGSSEPITVK                 | 2613.8             | 3            | 4.7652 | 0.3905 |
| SEAHLELLEEICDR                            | 1758.9             | 2            | 4.8871 | 0.3699 |
| SEALAVDGAGKPGAEEAQDPEGK                   | 2227.3             | 3            | 5.2287 | 0.4211 |
| SEALPTDLPAPSAPDLTEPK                      | 2050.3             | 2            | 3.9335 | 0.3168 |

| Peptide Sequence                  | Peptide mass (m/z) | Charge State | Xcorr  | DelCn2 |
|-----------------------------------|--------------------|--------------|--------|--------|
| SEAQKQSDDELALVR                   | 1574.7             | 2            | 4.0662 | 0.3092 |
| SEASAFGASHHVAYFEASAK              | 2068.2             | 3            | 4.297  | 0.2831 |
| SEASLHPVLMSEAPWNTR                | 2026.3             | 2            | 4.3898 | 0.4467 |
| SEAVVEYVFSGSR                     | 1430.5             | 2            | 4.1396 | 0.4567 |
| SEDFGVNEDLADSDAR                  | 1740.7             | 2            | 3.6671 | 0.2078 |
| SEDFSLPAYMDR                      | 1431.6             | 2            | 3.8588 | 0.3584 |
| SEDLLDYGPFR                       | 1312.4             | 2            | 3.6256 | 0.3217 |
| SEDPDQQYLILNTAR                   | 1763.9             | 3            | 4.6129 | 0.3242 |
| SEDPLFVLEHSLPIDTQYYLEQQLAKPLLR    | 3558.0             | 3            | 4.1052 | 0.3952 |
| SEDQDLQGLKDKPLK                   | 1714.9             | 2            | 2.8891 | 0.2347 |
| SEDTLKALEDFLASLR                  | 1809.0             | 3            | 4.0979 | 0.2737 |
| SEDYVDIVQGNR                      | 1395.5             | 2            | 3.5568 | 0.3162 |
| SEEAHAEDSVMDDHHFR                 | 1898.0             | 2            | 4.6572 | 0.4451 |
| SEEDLFLQVYEDLIQELAK               | 2283.5             | 2            | 3.0553 | 0.2152 |
| SEEEQSSSSVKKDETENVK               | 2012.1             | 2            | 4.5559 | 0.2907 |
| SEEERTTEAEKNER                    | 1708.7             | 2            | 3.5173 | 0.1436 |
| SEEERTTETQKNER                    | 1735.8             | 3            | 3.8336 | 0.2746 |
| SEEHADSKEHAK                      | 1368.4             | 2            | 2.5313 | 0.239  |
| SEEMQTVQQEQLLQETQALQQSFLSEKDSLLQR | 3895.3             | 3            | 6.1956 | 0.4328 |
| SEENTKEEKPSK                      | 1521.6             | 2            | 3.2163 | 0.236  |
| SEEQLKEEGIEYK                     | 1582.7             | 3            | 4.3908 | 0.3508 |
| SEESYKDSTLIMQLLR                  | 1914.2             | 2            | 5.0834 | 0.4356 |
| SEETLDEGPPK                       | 1202.3             | 2            | 3.1219 | 0.2001 |
| SEETLDEGPPKYTK                    | 1594.7             | 2            | 3.8078 | 0.2972 |
| SEETSKNQIK                        | 1164.2             | 2            | 2.805  | 0.1094 |
| SEEWADNHLPLTDAELAR                | 2068.2             | 3            | 4.7726 | 0.3267 |
| SEFEQNLSEK                        | 1211.3             | 2            | 2.7525 | 0.1497 |
| SEFGSVDGPLPHPR                    | 1495.6             | 2            | 2.5304 | 0.3763 |
| SEFVVPDLELPSWLTTGNYR              | 2324.6             | 2            | 5.0173 | 0.4533 |
| SEGEDKPKQSEGKSPASQAKPESQPR        | 2568.7             | 3            | 4.874  | 0.3541 |
| SEGEFKQTSSFLV                     | 1459.6             | 2            | 3.6016 | 0.169  |
| SEGEGEAASADDGSLNTSGAGPK           | 2108.1             | 2            | 4.1533 | 0.3753 |
| SEGEKPKQGEGKSPASQAKPESQPR         | 2480.6             | 3            | 4.9421 | 0.3885 |
| SEGETIMSSSMGK                     | 1344.5             | 2            | 3.6589 | 0.3805 |
| SEGGLSAAPAR                       | 1016.1             | 2            | 3.0374 | 0.123  |
| SEGSHHITSTPGVPK                   | 1534.7             | 2            | 3.5843 | 0.2849 |

| Peptide Sequence                | Peptide mass (m/z) | Charge State | Xcorr  | DelCn2 |
|---------------------------------|--------------------|--------------|--------|--------|
| SEGSMSDVKR                      | 1098.2             | 2            | 2.4857 | 0.2738 |
| SEHKLSTDHIPILYR                 | 1810.0             | 2            | 4.1805 | 0.4464 |
| SEHKVWSPLVTEEGKR                | 1883.1             | 3            | 4.6108 | 0.3434 |
| SEHPGLSIGDTAK                   | 1312.4             | 2            | 3.054  | 0.3058 |
| SEHPGLSIGDTAKK                  | 1440.6             | 2            | 3.1873 | 0.3046 |
| SEHQKLEENIDNIKR                 | 1854.0             | 2            | 4.4369 | 0.3657 |
| SEHSHSTTLPR                     | 1252.3             | 2            | 2.7131 | 0.2673 |
| SEHTQTVSQLTSQNEVLR              | 2058.2             | 3            | 3.5144 | 0.1785 |
| SEIDLFNIR                       | 1107.2             | 2            | 3.0079 | 0.2322 |
| SEIDLFNIRK                      | 1235.4             | 2            | 3.1139 | 0.1933 |
| SEIDLLDIR                       | 1074.2             | 2            | 3.2163 | 0.2202 |
| SEIDLLNIR                       | 1073.2             | 2            | 3.2548 | 0.1054 |
| SEIDLQIK                        | 1045.2             | 2            | 2.7802 | 0.1636 |
| SEIIPMFSNQLASDEQDSVR            | 2139.3             | 2            | 3.5604 | 0.3385 |
| SEIQAEQDRK                      | 1204.3             | 2            | 2.6702 | 0.1192 |
| SEISENTDASGK                    | 1238.2             | 2            | 2.4316 | 0.1036 |
| SEIVGVSRAGTTSR                  | 1420.6             | 2            | 2.4973 | 0.1353 |
| SEKELNHLAVDEASGVVYLGAVNALYQLDAK | 3318.7             | 3            | 4.7161 | 0.2341 |
| SEKFAFQAEVNR                    | 1426.6             | 2            | 3.2874 | 0.3359 |
| SEKGVIQVYDLGQDGGQMSR            | 2168.4             | 3            | 3.959  | 0.3254 |
| SELALCLGLK                      | 1047.3             | 2            | 2.5854 | 0.1596 |
| SELASAVLEAVENNTLSIEPVGLQPIR     | 2851.2             | 3            | 4.5677 | 0.314  |
| SELASAVLEAVENNTLSIEPVGLQPIRFVK  | 3225.7             | 3            | 4.0291 | 0.1518 |
| SELDMLDIR                       | 1092.2             | 2            | 3.3828 | 0.2697 |
| SELETLGKLEQVR                   | 1615.9             | 2            | 3.2687 | 0.2412 |
| SELEMVSGNVR                     | 1221.4             | 2            | 3.215  | 0.1161 |
| SELERESK                        | 978.0              | 2            | 2.681  | 0.1367 |
| SELGKLSLDKVFR                   | 1492.7             | 2            | 3.6315 | 0.3761 |
| SELGNQSPSTSSR                   | 1350.4             | 2            | 3.8666 | 0.3936 |
| SELHIENLNMEADPGQYR              | 2117.3             | 2            | 3.5736 | 0.4177 |
| SELLVEQYLPLTEEELEKEAK           | 2491.8             | 3            | 3.3391 | 0.1719 |
| SELSGNFKTLALMK                  | 1782.1             | 2            | 3.3964 | 0.2145 |
| SELVAMLEEEELRK                  | 1676.9             | 2            | 3.8095 | 0.2714 |
| SELVANNVTLPAGEQRK               | 1827.0             | 2            | 4.1271 | 0.3277 |
| SEMESVLAQLDNYGQQELADLFVNYNVK    | 3219.5             | 3            | 3.8131 | 0.2017 |
| SEMTPEELQKREEEEFNTGPLSVLTQSVK   | 3337.7             | 3            | 5.2616 | 0.4269 |

| Peptide Sequence                           | Peptide mass (m/z) | Charge State | Xcorr  | DelCn2 |
|--------------------------------------------|--------------------|--------------|--------|--------|
| SENAVVDGPFLVEK                             | 1504.7             | 2            | 3.215  | 0.1941 |
| SENESEAAR                                  | 993.0              | 2            | 2.5306 | 0.1864 |
| SENGLEFTSSGSANTETTKVTGSLETK                | 2776.9             | 3            | 4.0417 | 0.3114 |
| SENLDNPIQTVSLGQSLFFHFPLLRL                 | 2971.4             | 3            | 4.1523 | 0.3257 |
| SEPALAPADFVAPLAPLPIPSNLFVPTPDAAEEPQLPDGTGR | 4209.7             | 3            | 3.7342 | 0.2462 |
| SEPDDSDPFSFDGPEIMGCTGCQIDWKK               | 3106.4             | 3            | 3.2423 | 0.2393 |
| SEPHLSSEALMR                               | 1444.6             | 2            | 3.2122 | 0.3792 |
| SEPIPESNDGPVK                              | 1369.5             | 2            | 3.1682 | 0.2332 |
| SEPNQTENDALEPEDLSQAAEQDEMR                 | 2948.0             | 3            | 5.0851 | 0.419  |
| SEPPVSEQLDVAGR                             | 1484.6             | 2            | 2.7892 | 0.4561 |
| SEPQNLGGAAGR                               | 1157.2             | 2            | 2.8849 | 0.3237 |
| SEPVKEESSELEQPFAQDTSSVGPDR                 | 2850.0             | 3            | 3.8424 | 0.2536 |
| SEPVKEESSELEQPFAQDTSSVGPDRK                | 2978.1             | 3            | 6.0585 | 0.4319 |
| SEQAVAQLEEEKKHLEFLGQLR                     | 2583.9             | 3            | 4.726  | 0.3144 |
| SEQAVAQLEEEKKHLLFMSQIR                     | 2615.9             | 3            | 4.8973 | 0.3699 |
| SEQDQAENEGEDSAVLMER                        | 2138.2             | 2            | 6.6001 | 0.4678 |
| SEQFINLR                                   | 1007.1             | 2            | 2.885  | 0.209  |
| SEQSSMLELLR                                | 1293.5             | 2            | 3.171  | 0.2468 |
| SEQSVAQLEEEKKHLEFMNQLK                     | 2647.0             | 3            | 3.6588 | 0.2283 |
| SEQSVAQLEEEKKHLEFMNQLKK                    | 2775.1             | 3            | 4.0646 | 0.1834 |
| SESAEELKKR                                 | 1177.3             | 2            | 2.9065 | 0.1505 |
| SESELIDELSEDFDR                            | 1784.8             | 2            | 4.5673 | 0.4898 |
| SESEVEEAAAIIAQRPDNPR                       | 2183.3             | 3            | 3.8405 | 0.3572 |
| SESLKDVLER                                 | 1176.3             | 2            | 2.642  | 0.1315 |
| SESPPEPEQLR                                | 1301.3             | 2            | 2.9905 | 0.1115 |
| SESPPEPEQLRK                               | 1429.5             | 2            | 3.1194 | 0.1309 |
| SESPKEPEQLR                                | 1300.4             | 2            | 2.52   | 0.1285 |
| SESPKEPEQLRK                               | 1428.6             | 2            | 3.0337 | 0.1058 |
| SESRVPPPSDAPLPFDR                          | 1868.0             | 3            | 3.7479 | 0.2772 |
| SESTAAAEHK                                 | 1031.1             | 2            | 2.4728 | 0.2276 |
| SETAPAAPAAPAPAEKTPVK                       | 1905.1             | 2            | 3.2179 | 0.3513 |
| SETDLLDIR                                  | 1062.2             | 2            | 2.5306 | 0.1318 |
| SETEDSILHQLFIVR                            | 1788.0             | 2            | 3.4179 | 0.274  |
| SETHAAGHSQEK                               | 1282.3             | 2            | 3.7292 | 0.4744 |
| SETITEEELVGLMNK                            | 1693.9             | 2            | 3.835  | 0.2535 |
| SETSGSFEDALLAIVK                           | 1667.8             | 2            | 5.1058 | 0.4899 |

| Peptide Sequence                         | Peptide mass (m/z) | Charge State | Xcorr  | DelCn2 |
|------------------------------------------|--------------------|--------------|--------|--------|
| SETYKYLYGR                               | 1280.4             | 2            | 2.5759 | 0.2965 |
| SEVAAENHLR                               | 1126.2             | 2            | 2.9341 | 0.2273 |
| SEVAKDFEPER                              | 1307.4             | 2            | 3.1447 | 0.2814 |
| SEVATLTAAGK                              | 1048.2             | 2            | 2.4266 | 0.1127 |
| SEVATLTAAGKEVMLVGIGDKIR                  | 2359.8             | 3            | 3.6492 | 0.1406 |
| SEVEEQKEQR                               | 1262.3             | 2            | 2.9096 | 0.1897 |
| SEVELAAALSDKR                            | 1389.5             | 2            | 3.2352 | 0.257  |
| SEVELAAALSDKRGLESDVAELR                  | 2459.7             | 3            | 4.2089 | 0.2197 |
| SEVPGAAAEGSGGSGVGIGDR                    | 1830.9             | 2            | 5.2295 | 0.5163 |
| SEVQQPVHPKPLSPDSR                        | 1902.1             | 3            | 3.9725 | 0.3823 |
| SEVTDLRR                                 | 976.1              | 2            | 2.6129 | 0.1237 |
| SEWGSLLLEELVAEGK                         | 1647.8             | 2            | 4.4977 | 0.3646 |
| SEWSDLLSDLQK                             | 1421.5             | 2            | 4.4255 | 0.301  |
| SEYDRGVNTFSPEGR                          | 1714.8             | 3            | 3.6932 | 0.305  |
| SEYMEGNVR                                | 1085.2             | 2            | 2.418  | 0.2152 |
| SEYNDQLTR                                | 1126.2             | 2            | 2.5464 | 0.1877 |
| SFAHFDVQSMLFDLNEAAAANR                   | 2384.6             | 3            | 3.3328 | 0.1139 |
| SFAHLLPSPSPSPGSGSYVGQHSQGLGGHYADSYLKR    | 3871.2             | 3            | 4.5336 | 0.3042 |
| SFANEEGEAQKFR                            | 1513.6             | 2            | 2.9478 | 0.1719 |
| SFAVGMFK                                 | 887.1              | 2            | 2.7435 | 0.1884 |
| SFAVGMFKGQLTTDQVFPYPSVLNNEEQTQFLK        | 3652.1             | 3            | 4.7208 | 0.2821 |
| SFDALNFVTMLKMVWISK                       | 2131.6             | 2            | 3.1761 | 0.1727 |
| SFDDPIVQTER                              | 1307.4             | 2            | 3.5567 | 0.33   |
| SFDELGEIISVYEDLVANGVIVPAQEVPPPTVPMDISWAR | 4534.1             | 3            | 3.7226 | 0.2263 |
| SFDFEIETK                                | 1116.2             | 2            | 2.7323 | 0.2309 |
| SFDFIHLDPFGTSVNYLDSAFR                   | 2549.8             | 3            | 3.9759 | 0.2618 |
| SFDKLLKDLPELALDTPR                       | 2072.4             | 2            | 3.4761 | 0.2663 |
| SFDLISHNR                                | 1089.2             | 2            | 2.4631 | 0.2615 |
| SFDSASQVPNPAAAAIPR                       | 1800.0             | 2            | 3.797  | 0.3782 |
| SFDSNAFTLLLR                             | 1384.6             | 2            | 4.3306 | 0.4429 |
| SFEADAFQDLLATYGPLDNVR                    | 2343.5             | 2            | 5.4343 | 0.4751 |
| SFEDIHHYR                                | 1204.3             | 2            | 3.125  | 0.2504 |
| SFEDRVGTIK                               | 1152.3             | 2            | 2.4427 | 0.1679 |
| SFEKVENLKSK                              | 1438.6             | 2            | 3.5567 | 0.1136 |
| SFEGRELLVIELSDNPGVHEPGEPEFK              | 3026.3             | 3            | 4.4199 | 0.2515 |
| SFENGIGKELHEQLVALDK                      | 2128.4             | 3            | 4.601  | 0.4327 |

| Peptide Sequence                      | Peptide mass (m/z) | Charge State | Xcorr  | DelCn2 |
|---------------------------------------|--------------------|--------------|--------|--------|
| SFENGIGKELHEQLVALDKQNK                | 2498.8             | 2            | 5.89   | 0.5266 |
| SFENKPPAHIAASHLSEPAKPAHSQNQSNFSSYSK   | 3883.2             | 3            | 5.814  | 0.3877 |
| SFENSLGINVPR                          | 1333.5             | 2            | 3.4151 | 0.3642 |
| SFEVEEVETPNSTPPR                      | 1818.9             | 2            | 4.2419 | 0.2501 |
| SFEWLSQMR                             | 1184.3             | 2            | 3.1192 | 0.2699 |
| SFFHQHYLGGQEPTPSNIR                   | 2216.4             | 2            | 4.81   | 0.4148 |
| SFFLQPGEQLEQGIQDVYVLSEQQGLLLR         | 3336.7             | 3            | 6.1529 | 0.5343 |
| SFFQAATEHLLPMGTALPLLEAQAATHLVDPIGQR   | 3948.5             | 3            | 4.4726 | 0.3226 |
| SFFSEIISSISDVK                        | 1559.7             | 2            | 4.3534 | 0.4121 |
| SFFSFLGEAFDGR                         | 1551.7             | 2            | 4.5374 | 0.4783 |
| SFFWNVAPGAESAVASFVTQLAAAEALQK         | 3012.4             | 3            | 3.8944 | 0.2748 |
| SFFWNVAPGAESAVASFVTQLAAAEALQKAPDVTTLP | 3963.4             | 3            | 3.5878 | 0.1229 |
| SFGIEDKDKQIITFFSPLTILVGPNGAGK         | 3094.5             | 3            | 3.3806 | 0.1378 |
| SFGTRPLSSGFSPEEAQQQDEEFEK             | 2831.9             | 3            | 3.2844 | 0.1976 |
| SFHSFYQLLQGGSEQMLR                    | 2129.4             | 2            | 6.121  | 0.5337 |
| SFIKDYPPVSIEDPFDQDDWGAWQK             | 2987.2             | 3            | 6.3424 | 0.3957 |
| SFITTDVNPYYDSFVR                      | 1925.1             | 2            | 4.5724 | 0.391  |
| SFKNQIATHEK                           | 1303.4             | 2            | 3.6733 | 0.2745 |
| SFLEDTPARDEK                          | 1509.6             | 2            | 3.4488 | 0.2291 |
| SFLEEVLASGLHSR                        | 1545.7             | 2            | 4.4875 | 0.4132 |
| SFLEFAEDVIQVPR                        | 1650.9             | 2            | 3.4961 | 0.2678 |
| SFLENLKVNTENLLQVENTGK                 | 2391.7             | 3            | 4.2052 | 0.3311 |
| SFLHIGHK                              | 802.0              | 2            | 2.4892 | 0.1088 |
| SFLINFIHTLENQR                        | 1733.0             | 2            | 2.7657 | 0.1304 |
| SFLIWNNEEDHTR                         | 1646.8             | 2            | 3.4062 | 0.3297 |
| SFLLKDSETSQR                          | 1411.5             | 2            | 3.3613 | 0.1754 |
| SFLNAHHR                              | 982.1              | 2            | 2.4055 | 0.3111 |
| SFLPEKSGYPDIGFPLFPLSK                 | 2340.7             | 3            | 4.0477 | 0.3177 |
| SFLRLAKISFDVLIKKALA                   | 2134.6             | 2            | 3.0078 | 0.1196 |
| SFLSQGQVLK                            | 1107.3             | 2            | 2.687  | 0.1553 |
| SFLSQGQVLKLEAK                        | 1548.8             | 2            | 3.8921 | 0.1702 |
| SFLVASVLPKPDGNINSPTR                  | 2042.3             | 2            | 2.8217 | 0.1696 |
| SFLYEIVSNKR                           | 1356.6             | 2            | 2.7858 | 0.2707 |
| SFMALSQDIQK                           | 1268.5             | 2            | 3.2427 | 0.1988 |
| SFMHVNTNANFYK                         | 1573.8             | 2            | 3.6807 | 0.3647 |
| SFMHVNTNANFYKDSGITYLGIK               | 2622.0             | 3            | 6.0238 | 0.5201 |



| Peptide Sequence                         | Peptide mass (m/z) | Charge State | Xcorr  | DelCn2 |
|------------------------------------------|--------------------|--------------|--------|--------|
| SFNAEQEEKQDLSKEIESLKVSIQLTR              | 3222.6             | 3            | 4.6772 | 0.3308 |
| SFNVDLLAGK                               | 1064.2             | 2            | 2.8188 | 0.1589 |
| SFPDFPTPGVVFR                            | 1466.7             | 2            | 3.3249 | 0.4175 |
| SFPDQFSTGEPPALDEVPEVR                    | 2318.5             | 2            | 4.1909 | 0.4667 |
| SFPKDDPSKPVHLTAFLGYK                     | 2248.6             | 3            | 4.0776 | 0.3862 |
| SFPLHFDENSFFAGDKK                        | 1987.2             | 2            | 3.6592 | 0.3717 |
| SFQGPVLIGSSHGGVNIEDVAAESPEAIIKEPIDIEGIKK | 4275.8             | 3            | 4.2763 | 0.2904 |
| SFQGPVLIGSSHGGVNIEDVAAETPEAIIKEPIDIEGIKK | 4289.8             | 3            | 5.7928 | 0.4955 |
| SFQQSSLSR                                | 1040.1             | 2            | 2.5883 | 0.225  |
| SFSASQADPLSDPDQ                          | 1565.6             | 2            | 4.3517 | 0.3707 |
| SFSASQADPLSDPDQM                         | 1696.8             | 2            | 4.9789 | 0.5049 |
| SFSASQADPLSDPDQMN                        | 1810.9             | 2            | 4.8402 | 0.5272 |
| SFSASQADPLSDPDQMNE                       | 1940.0             | 2            | 5.27   | 0.4845 |
| SFSASQADPLSDPDQMNEDE                     | 2055.1             | 2            | 6.2114 | 0.5148 |
| SFSASQADPLSDPDQMNEDEK                    | 2183.3             | 2            | 5.2824 | 0.3568 |
| SFSASQADPLSDPDQMNEDEKR                   | 2339.4             | 2            | 4.556  | 0.4931 |
| SFSASQADPLSDPDQMNEDEKRHSQGTFTSDYSK       | 3678.8             | 3            | 3.8088 | 0.2763 |
| SFSERFPEDGPELEEILTQLATADAR               | 2923.1             | 3            | 5.0478 | 0.3407 |
| SFSGGQLASGPDPAFPR                        | 1691.8             | 2            | 4.6574 | 0.3809 |
| SFSHGATLAQHR                             | 1312.4             | 2            | 2.8046 | 0.2228 |
| SFSKESDDPMAYIHFTAEGEVTFK                 | 2738.0             | 3            | 4.1499 | 0.3071 |
| SFSNIISTLNPTAK                           | 1493.7             | 2            | 3.9731 | 0.1889 |
| SFSQPEAGGSHHK                            | 1369.4             | 2            | 3.2194 | 0.2892 |
| SFSTASAITPSVSR                           | 1411.5             | 2            | 3.5819 | 0.4686 |
| SFTETMSSLSPGKPWQTK                       | 2013.3             | 2            | 2.9377 | 0.1845 |
| SFTKDAHALIYKDLPFETLEVEAK                 | 2767.1             | 3            | 3.5275 | 0.186  |
| SFTPDHVVYAR                              | 1292.4             | 2            | 2.8313 | 0.232  |
| SFTPHQQAHIPNSIMTILEASGK                  | 2508.8             | 3            | 4.5713 | 0.4235 |
| SFTPHQQAHIPNSIMTILEASGKQEPEAK            | 3191.6             | 3            | 3.3778 | 0.1754 |
| SFTPVFLGSALK                             | 1267.5             | 2            | 3.136  | 0.3465 |
| SFTSEDDLVLKQLNLGAK                       | 2092.4             | 3            | 4.3324 | 0.2809 |
| SFTSSSPSSPSR                             | 1227.3             | 2            | 2.7755 | 0.2928 |
| SFVDKVGESNNMV                            | 1426.6             | 2            | 3.2755 | 0.2658 |
| SFVEFILEPLYK                             | 1485.7             | 2            | 3.4343 | 0.2635 |
| SFVELSGAER                               | 1095.2             | 2            | 2.699  | 0.1438 |
| SFVLNLGK                                 | 878.1              | 2            | 2.5235 | 0.1348 |

| Peptide Sequence                   | Peptide mass (m/z) | Charge State | Xcorr  | DelCn2 |
|------------------------------------|--------------------|--------------|--------|--------|
| SFVVTSVVAFPTDSK                    | 1584.8             | 2            | 3.3938 | 0.326  |
| SFVWHALDYADELPKPEQLAIR             | 2599.9             | 3            | 3.9743 | 0.2556 |
| SFYDLSAISLDGEKVDNFNTR              | 2425.6             | 3            | 3.8164 | 0.2315 |
| SFYPEEVSSMVLTK                     | 1617.8             | 2            | 4.6627 | 0.462  |
| SFYSGAVVSHHETALGLPR                | 2029.2             | 3            | 3.9713 | 0.4192 |
| SGAAQGLAEVMAGLGVEK                 | 1688.9             | 2            | 3.7385 | 0.3415 |
| SGAAQGLAEVMAGLGVEKLEK              | 2059.4             | 3            | 3.9304 | 0.37   |
| SGAEAQTPEDSPNR                     | 1459.5             | 2            | 3.4118 | 0.2048 |
| SGAEDQTPKDVPNKSGAEK                | 1959.1             | 3            | 3.3321 | 0.2522 |
| SGAEEQGPIDGPSK                     | 1372.4             | 2            | 3.0291 | 0.1432 |
| SGAEEQTSKDSPNK                     | 1478.5             | 2            | 4.0245 | 0.3637 |
| SGAEVEAGDAAER                      | 1262.3             | 2            | 3.1212 | 0.1829 |
| SGAFGHLFRPDNFIGQSGAGNNWAK          | 2797.0             | 3            | 6.827  | 0.4886 |
| SGAHVDFYDK                         | 1139.2             | 2            | 2.4502 | 0.1951 |
| SGAHVVVTGPPNAGK                    | 1391.6             | 2            | 2.4581 | 0.3199 |
| SGAPAAESK                          | 817.9              | 2            | 2.9426 | 0.3177 |
| SGAPAAESKEIVR                      | 1315.5             | 2            | 3.5286 | 0.4147 |
| SGAQASSTPLSPTR                     | 1360.5             | 2            | 4.3982 | 0.3359 |
| SGASGPENFQVGSMPPAQQQITSGQMHR       | 2929.2             | 3            | 6.3407 | 0.4495 |
| SGATAGAAGGR                        | 875.9              | 2            | 3.651  | 0.4131 |
| SGAVQGAGSLGPGSPVR                  | 1497.6             | 2            | 3.3869 | 0.3845 |
| SGAYLIPLLER                        | 1232.5             | 2            | 2.7646 | 0.1601 |
| SGDAIVDMVPGKPMCVESFSDYPPLGR        | 2940.4             | 3            | 3.8235 | 0.395  |
| SGDAPLTVNELGTAYVSATTGAVATALGLNALTK | 3249.6             | 3            | 6.1311 | 0.5128 |
| SGDGLSGTQKEAALR                    | 1490.6             | 2            | 3.0635 | 0.1451 |
| SGDGVVTVDDL                        | 1233.3             | 2            | 3.267  | 0.1441 |
| SGDIVMIQSEHTGAIDVLSADLESADLLGDHRK  | 3494.8             | 3            | 4.9791 | 0.3086 |
| SGDLGDMEPLKGTTPLMQKI               | 2132.5             | 3            | 4.9502 | 0.3951 |
| SGDSEVYQLGDVSQK                    | 1612.7             | 2            | 5.3504 | 0.4298 |
| SGDSEVYQLGDVSQKTTWHR               | 2294.4             | 3            | 4.1604 | 0.2416 |
| SGDTLLLLHHGDFSAEEVFHR              | 2381.6             | 3            | 5.9467 | 0.4093 |
| SGDWKGYTGK                         | 1099.2             | 2            | 2.6848 | 0.1306 |
| SGDWVCPNPSCGNMNFAR                 | 1956.2             | 2            | 2.9109 | 0.1512 |
| SGDYALER                           | 911.0              | 2            | 2.7789 | 0.2894 |
| SGEADLGPARR                        | 1129.2             | 2            | 2.5033 | 0.1149 |
| SGEATDGARPQALPEPMQESK              | 2200.4             | 2            | 5.0029 | 0.4016 |

| Peptide Sequence                   | Peptide mass (m/z) | Charge State | Xcorr  | DelCn2 |
|------------------------------------|--------------------|--------------|--------|--------|
| SGEEGMPDLAHVMR                     | 1529.7             | 2            | 3.5278 | 0.3845 |
| SGEHDFGAAFDGDGDR                   | 1653.6             | 2            | 4.5597 | 0.4332 |
| SGEHDFGAAFDGDGDRNMILGK             | 2310.4             | 3            | 5.0997 | 0.4503 |
| SGEILYR                            | 837.9              | 2            | 2.6346 | 0.1788 |
| SGEKITVTPSSK                       | 1234.4             | 2            | 3.0264 | 0.2374 |
| SGEKPLGGSLMEYAILSIAAAMNEPK         | 2792.3             | 3            | 4.6135 | 0.5093 |
| SGELAQEYDKR                        | 1296.4             | 2            | 2.8725 | 0.2419 |
| SGELEQEEER                         | 1206.2             | 2            | 3.7292 | 0.2666 |
| SGELEQEEERLSKEWEDS                 | 2181.2             | 3            | 5.0461 | 0.3352 |
| SGELEQEEERLSKEWEDSKR               | 2465.6             | 3            | 5.7141 | 0.3198 |
| SGENFKLLYDLADQLHAAVGASR            | 2476.7             | 3            | 7.0482 | 0.5003 |
| SGERPVTAGEEDEQVPDSIDAR             | 2358.4             | 3            | 4.5657 | 0.2005 |
| SGESVKVHQLDVAIPLHLK                | 2071.4             | 2            | 4.1728 | 0.3439 |
| SGETEDTFIADLVVGLCTGQIK             | 2297.6             | 2            | 6.394  | 0.5301 |
| SGETEDTFIADLVVGLCTGQIKTGAPCR       | 2883.2             | 3            | 5.049  | 0.3908 |
| SGETEDTFIADLVVGLCTGQIKTGAPCRSER    | 3255.6             | 3            | 4.5673 | 0.3226 |
| SGEVLVNVKEHSR                      | 1454.6             | 2            | 4.2458 | 0.3303 |
| SGFEGMFIR                          | 1044.2             | 2            | 2.7803 | 0.2882 |
| SGFEPASLKEEVGEEAIVELVENGK          | 2661.9             | 3            | 3.3098 | 0.1486 |
| SGFEPASLKEEVGEEAIVELVENGKK         | 2790.1             | 3            | 6.5162 | 0.4682 |
| SGFSLDNGELR                        | 1195.3             | 2            | 2.8486 | 0.3483 |
| SGFSSISVSR                         | 1027.1             | 2            | 2.8315 | 0.202  |
| SGFTPLHIAAHYGNINVATLLLNR           | 2594.0             | 3            | 4.1135 | 0.2822 |
| SGGASHSELIHNLNR                    | 1478.6             | 2            | 4.1827 | 0.3941 |
| SGGASHSELIHNLRK                    | 1606.8             | 2            | 4.1235 | 0.337  |
| SGGELDIVVTSNKEVK                   | 1675.9             | 2            | 4.4635 | 0.3857 |
| SGGGGDIHQGFQSLLTEVVK               | 2045.2             | 3            | 5.5892 | 0.4718 |
| SGGGGDIHQGFQSLLTEVNKTGTQYLLR       | 2978.3             | 3            | 6.7891 | 0.4361 |
| SGGGGGGGSSWGR                      | 1193.2             | 2            | 3.9283 | 0.3531 |
| SGGGGYSQNR                         | 983.0              | 2            | 3.4074 | 0.3034 |
| SGGGYGGDR                          | 825.8              | 2            | 2.8398 | 0.2686 |
| SGGIETIANEYSDR                     | 1512.6             | 2            | 3.9089 | 0.4009 |
| SGGLGGSHALLLR                      | 1351.6             | 2            | 3.6455 | 0.3204 |
| SGGMERPFVLAR                       | 1320.5             | 2            | 2.6465 | 0.1814 |
| SGGMSNELNIIISR                     | 1492.6             | 2            | 4.2127 | 0.3593 |
| SGGNSYSGGASYNPGSHGGYGGGSGGGSSYQ GK | 3014.0             | 3            | 3.4823 | 0.1684 |

| Peptide Sequence                   | Peptide mass (m/z) | Charge State | Xcorr  | DelCn2 |
|------------------------------------|--------------------|--------------|--------|--------|
| SGGPHGAGVLGLHLEGPFFISR             | 2059.3             | 2            | 5.8237 | 0.5216 |
| SGGTALHVAAAK                       | 1083.2             | 2            | 3.0634 | 0.3252 |
| SGGTEGLLAEKLEALITQTR               | 2088.3             | 3            | 4.9379 | 0.3857 |
| SGGTVVENGVHK                       | 1184.3             | 2            | 2.9363 | 0.1935 |
| SGHEQVVEMLLDR                      | 1513.7             | 2            | 3.9393 | 0.3667 |
| SGHFEQAIKEGEDMIAEEHFGSEK           | 2706.9             | 3            | 6.7936 | 0.6098 |
| SGHIQDYQITASSIFR                   | 1824.0             | 2            | 5.1137 | 0.4753 |
| SGHIQTLLR                          | 1025.2             | 2            | 2.5754 | 0.1166 |
| SGHKPDNIK                          | 996.1              | 2            | 2.5204 | 0.1588 |
| SGHKPDNIKGNLEFR                    | 1712.9             | 2            | 3.6277 | 0.2541 |
| SGILAAESIFNQLTSENLSK               | 2251.5             | 2            | 6.279  | 0.5103 |
| SGIPIVTSPIYQIHFTK                  | 1789.1             | 2            | 4.3394 | 0.4624 |
| SGKAPILIATDVASR                    | 1499.7             | 2            | 4.2297 | 0.451  |
| SGKDFVTEALQSR                      | 1438.6             | 2            | 3.6381 | 0.3476 |
| SGKDLTKR                           | 905.0              | 2            | 2.6505 | 0.1901 |
| SGKGFYIYQEGVK                      | 1476.7             | 2            | 3.8479 | 0.3899 |
| SGKGPILMELQTYR                     | 1593.9             | 2            | 3.1471 | 0.2623 |
| SGKKLEDGPK                         | 1059.2             | 2            | 2.8064 | 0.2433 |
| SGKKLEDNPK                         | 1116.3             | 2            | 3.043  | 0.1509 |
| SGKLVPEWVDTVK                      | 1586.9             | 2            | 3.4787 | 0.2556 |
| SGKNQFNR                           | 951.0              | 2            | 2.5486 | 0.1905 |
| SGKNSQEDSEDSEDKDVK                 | 1998.0             | 2            | 5.192  | 0.3531 |
| SGKPAELLK                          | 943.1              | 1            | 2.5606 | 0.2403 |
| SGKPAELLKMFIDRDAIAQAVRGLITKA       | 3071.6             | 3            | 3.3485 | 0.2096 |
| SGKTELAEPPIAIRPTSETVMYPAYAK        | 2825.2             | 3            | 5.0791 | 0.4364 |
| SGKWEGLVYAPPGKEK                   | 1747.0             | 2            | 3.649  | 0.2771 |
| SGKYDLDFK                          | 1073.2             | 2            | 2.9447 | 0.1951 |
| SGKYDLDFKSPDDPSR                   | 1827.9             | 3            | 4.9384 | 0.5334 |
| SGKYDLDFKSPDDPSRYISPDQLADLYK       | 3235.5             | 3            | 5.7087 | 0.4451 |
| SGLAIVSQHDLQQLQADAINAFGESLQKK      | 3098.4             | 3            | 7.693  | 0.4228 |
| SGLDHKFQDDPDGLHQLDGTPLTAEDIVHK     | 3300.5             | 3            | 5.8011 | 0.4561 |
| SGLDHKFQDDPDGLHQLDGTPLTAEDIVHKIAAR | 3712.0             | 3            | 4.9143 | 0.3957 |
| SGLEELVLSEMNSPSR                   | 1748.9             | 2            | 3.5135 | 0.2831 |
| SGLGELILPENEPGSSIMPGK              | 2126.4             | 2            | 4.6409 | 0.3782 |
| SGLGPADLALLGLSAER                  | 1640.9             | 2            | 4.1753 | 0.4269 |
| SGLIFYR                            | 856.0              | 2            | 2.6075 | 0.2463 |

| Peptide Sequence                    | Peptide mass (m/z) | Charge State | Xcorr  | DelCn2 |
|-------------------------------------|--------------------|--------------|--------|--------|
| SGLIHVGDELK                         | 1196.3             | 2            | 2.6324 | 0.2477 |
| SGLKKQELLEALK                       | 1558.8             | 3            | 4.7458 | 0.269  |
| SGLKKQELLEALTKHFQD                  | 2086.4             | 2            | 3.3178 | 0.2846 |
| SGLLDKWK                            | 947.1              | 2            | 2.5392 | 0.1651 |
| SGLNIAHFK                           | 987.1              | 2            | 3.2475 | 0.1572 |
| SGLPPSEEQPTSQR                      | 1513.6             | 2            | 3.0424 | 0.297  |
| SGLSSPIYIDLR                        | 1321.5             | 2            | 2.967  | 0.1899 |
| SGLTADSKLHGK                        | 1214.4             | 2            | 2.9896 | 0.3078 |
| SGLTGLVIGGLYPVFLAIPVNGGLAAR         | 2627.1             | 3            | 3.8143 | 0.1848 |
| SGMFWLR                             | 897.1              | 2            | 2.9785 | 0.1845 |
| SGMFWLRF                            | 1044.3             | 2            | 2.5512 | 0.2215 |
| SGMNVAR                             | 734.8              | 1            | 1.6106 | 0.1555 |
| SGMSHEEDQLIPNLYR                    | 1890.1             | 2            | 4.2541 | 0.4058 |
| SGNALFHASTLHR                       | 1411.6             | 2            | 3.7842 | 0.3618 |
| SGNFGGSR                            | 781.8              | 1            | 1.7937 | 0.2755 |
| SGNFNFGAYHTLEEISQEMDNLVAEHPGLVSK    | 3535.8             | 3            | 5.4522 | 0.4767 |
| SGNIINMSSVASSVK                     | 1494.7             | 2            | 5.1102 | 0.4586 |
| SGNIVAGIANESK                       | 1260.4             | 2            | 4.1447 | 0.3633 |
| SGNLTEDDKHNNAK                      | 1543.6             | 2            | 4.4858 | 0.4252 |
| SGNLVSVLTQAEGAFVASLIK               | 2105.4             | 3            | 5.4002 | 0.4924 |
| SGNYTVLQVVEALGSSLENPEPR             | 2460.7             | 3            | 5.5821 | 0.4319 |
| SGPASTFNDRVFASELNAGIIKTDQNYEK       | 3174.4             | 3            | 3.9444 | 0.1499 |
| SGPEPLQEGPGPK                       | 1293.4             | 2            | 3.3803 | 0.2364 |
| SGPFGQIFRPDNFVFGQSGAGNNWAK          | 2800.0             | 3            | 7.9069 | 0.4756 |
| SGPFGQLFRPDNFIFGQTGAGNNWAK          | 2828.1             | 3            | 3.2742 | 0.1803 |
| SGPGGGLVEEGELIEVVHLPLEGAQAFADDPDIPK | 3557.9             | 3            | 6.0415 | 0.4934 |
| SGPGLIGLGIK                         | 1012.2             | 2            | 4.0925 | 0.247  |
| SGPGSQLNTK                          | 989.1              | 2            | 2.6584 | 0.2495 |
| SGPKPFSAPKPQTSPSPK                  | 1839.1             | 2            | 4.8123 | 0.3559 |
| SGPLFNFDVHDDVR                      | 1618.7             | 2            | 3.2774 | 0.3045 |
| SGPLISDAELDAFLTEQYLQTTNIK           | 2769.1             | 3            | 3.9516 | 0.1779 |
| SGPNIYELR                           | 1049.2             | 2            | 2.8858 | 0.1951 |
| SGPVILADEIKNPAMEKLELVR              | 2423.9             | 3            | 4.2818 | 0.3109 |
| SGQAKETIPLQETSLYTQDR                | 2266.5             | 2            | 5.5925 | 0.4284 |
| SGQEQIEDRDTMDFSGLSLIK               | 2370.6             | 3            | 5.3401 | 0.4329 |
| SGQGAFGNMCR                         | 1128.3             | 2            | 2.8897 | 0.3286 |

| Peptide Sequence                        | Peptide mass (m/z) | Charge State | Xcorr  | DelCn2 |
|-----------------------------------------|--------------------|--------------|--------|--------|
| SGQHIFSFFAFK                            | 1553.7             | 2            | 3.8391 | 0.4082 |
| SGQKPVLDVHAELDR                         | 1664.8             | 2            | 3.6906 | 0.3755 |
| SGQLGIQEEDLR                            | 1345.4             | 2            | 4.0844 | 0.279  |
| SGQLGIQEEDLRK                           | 1473.6             | 2            | 3.9634 | 0.3441 |
| SGQLGIQEEDLRKESK                        | 1818.0             | 2            | 4.0276 | 0.3305 |
| SGQLGIQEEDLRKESKDQLSDDVSK               | 2806.0             | 3            | 5.4853 | 0.4755 |
| SGQNNSVFTLYELTNGEDTEDEEFHGLDEATLLR      | 3846.0             | 3            | 6.8698 | 0.559  |
| SGQRKPATSYVR                            | 1350.5             | 2            | 2.4923 | 0.1855 |
| SGQSALYDALFSSQSPK                       | 1786.9             | 2            | 3.0803 | 0.3041 |
| SGQVLEVSGSK                             | 1091.2             | 2            | 3.4604 | 0.3501 |
| SGQVLEVSGSKAVVQVFEGTSGIDAK              | 2593.9             | 3            | 3.474  | 0.2325 |
| SGRPVDLSKVPSPLTDEEGDFILIHEDLR           | 3373.7             | 3            | 4.8867 | 0.3676 |
| SGSAADTQAVADAVTYQLGFHSIELNEPPLVHTAASLFK | 4058.5             | 3            | 6.2561 | 0.4916 |
| SGSAHEYSSSPDDAIFQSLAR                   | 2226.3             | 2            | 6.1517 | 0.5327 |
| SGSDEVQVGQQR                            | 1290.3             | 2            | 4.0858 | 0.3143 |
| SGSEAQTTKDSTSK                          | 1427.5             | 2            | 3.2527 | 0.3907 |
| SGSGTMNLGGSLTR                          | 1338.5             | 2            | 3.903  | 0.3802 |
| SGSHTVAVMNVGAPAAGMNAAVR                 | 2169.5             | 2            | 3.5164 | 0.1983 |
| SGSISYTELQQALSQMGYNLSPQFTQLLVSR         | 3448.8             | 3            | 4.8668 | 0.3964 |
| SGSKFPVFNMSYNPAENAVLLCTR                | 2647.0             | 3            | 4.9542 | 0.2713 |
| SGSLEFSIAGQPNDFFPVQVSFVSKK              | 2817.1             | 3            | 4.2955 | 0.424  |
| SGSLSLTQFADMISLK                        | 1699.0             | 2            | 4.5749 | 0.3986 |
| SGSMDPSGAHPSVR                          | 1385.5             | 2            | 4.2551 | 0.397  |
| SGSSFVHQASFK                            | 1282.4             | 2            | 2.5572 | 0.2572 |
| SGSYSYLEER                              | 1191.2             | 2            | 2.58   | 0.2457 |
| SGTDGAIALTGVDEAYTLEEFQHLLPK             | 2877.2             | 3            | 3.8184 | 0.109  |
| SGTGATATVSPKEILNLTSELLQK                | 2459.8             | 3            | 4.0657 | 0.158  |
| SGTIFDNFLITNDEAYAEFGNETWGVTK            | 3270.5             | 3            | 5.6918 | 0.4622 |
| SGTQDIQPGPLFNNDADGVATDITSTR             | 2790.9             | 3            | 4.6421 | 0.3451 |
| SGTQSDKVTLK                             | 1164.3             | 2            | 3.304  | 0.135  |
| SGTRVDHQTGPIVWGEPGTNGQHAFYQLIHQGTK      | 3719.0             | 3            | 4.4951 | 0.3416 |
| SGTSEFLNK                               | 983.1              | 2            | 2.8845 | 0.2225 |
| SGTSTPTTPGSTAITPGTPPSYSSR               | 2409.5             | 2            | 5.1375 | 0.4759 |
| SGTTWVSQILDMIYQGGDLEK                   | 2342.6             | 2            | 3.8152 | 0.2443 |
| SGTVDPQELQK                             | 1202.3             | 2            | 2.9826 | 0.2503 |
| SGTYSRKPLLPYTPGSDVAGVIEAVGDNASAFK       | 3369.7             | 3            | 6.7336 | 0.4678 |

| Peptide Sequence                    | Peptide mass (m/z) | Charge State | Xcorr  | DelCn2 |
|-------------------------------------|--------------------|--------------|--------|--------|
| SGVAYIAAPSGSAADKVVIEACDELGIILAHTNLR | 3527.0             | 3            | 3.9799 | 0.198  |
| SGVDADSSYFK                         | 1176.2             | 2            | 3.2506 | 0.2017 |
| SGVEVLFNELEIPVEEYSFGR               | 2414.7             | 3            | 6.3193 | 0.5614 |
| SGVGNIFIK                           | 935.1              | 2            | 2.5379 | 0.1919 |
| SGVISDELQQUALSNGTWTPFNPVTVR         | 2919.2             | 3            | 3.9596 | 0.1587 |
| SGVLQALLGR                          | 1014.2             | 2            | 3.3191 | 0.1719 |
| SGVNSELVKR                          | 1089.2             | 2            | 2.4817 | 0.201  |
| SGVPVLAVSLALEGK                     | 1440.7             | 2            | 4.2424 | 0.3951 |
| SGVSDHWALDDHHALHLTR                 | 2168.3             | 3            | 3.2626 | 0.2614 |
| SGVSLAALK                           | 846.0              | 2            | 3.0767 | 0.1901 |
| SGVSLAALKK                          | 974.2              | 2            | 3.6126 | 0.2531 |
| SGVSLAALKKALAAAGYDVEKNNSR           | 2534.9             | 3            | 4.1504 | 0.3278 |
| SGVYQHVTGEMMGHHAIR                  | 1931.2             | 2            | 5.7136 | 0.5289 |
| SGYDYSELDPEMEMAYEGQYDAYRDQFR        | 3430.6             | 3            | 3.5328 | 0.2985 |
| SGYFDER                             | 873.9              | 2            | 2.4169 | 0.1883 |
| SGYHQSASEHGLVVIAPDTSPR              | 2309.5             | 3            | 6.2652 | 0.4514 |
| SGYITIGYR                           | 1030.2             | 2            | 2.8977 | 0.286  |
| SGYLAGDKLLPQR                       | 1418.6             | 3            | 3.6054 | 0.2954 |
| SGYLLPDTK                           | 994.1              | 2            | 3.4088 | 0.261  |
| SGYLLPDTKAYGDRIER                   | 1955.2             | 2            | 3.0541 | 0.2919 |
| SGYLSSER                            | 898.9              | 2            | 2.5471 | 0.2479 |
| SGYPDIGFPLFPLSK                     | 1638.9             | 2            | 3.4078 | 0.162  |
| SGYRIDFYFDENPYFENK                  | 2305.4             | 2            | 3.1606 | 0.2526 |
| SHAQKNENAR                          | 1155.2             | 2            | 3.1412 | 0.2539 |
| SHATTEPEQTEPEQREPTYPYDER            | 2825.9             | 3            | 3.6086 | 0.2747 |
| SHCIAEVENDEMPADLPSLAADFVESK         | 2919.2             | 3            | 4.9004 | 0.2289 |
| SHDAIIDLNRK                         | 1397.5             | 2            | 3.5885 | 0.3442 |
| SHDDGNIDLESDFSFLKFDSEPSAVALLELPTK   | 3406.6             | 3            | 6.407  | 0.4773 |
| SHDGKLLASADDFGK                     | 1561.7             | 2            | 4.6992 | 0.4324 |
| SHDGKTPQLPR                         | 1236.4             | 2            | 3.0996 | 0.3937 |
| SHDPEEAIKRDVIVSIVTAAK               | 2288.5             | 3            | 3.8349 | 0.3755 |
| SHDTTSNTLAQLLAK                     | 1600.8             | 2            | 3.7038 | 0.4147 |
| SHEAEVLK                            | 913.0              | 1            | 1.8647 | 0.1022 |
| SHEAEVLKQLAEKR                      | 1638.9             | 2            | 4.6454 | 0.5114 |
| SHEDPRVVA AVR                       | 1336.5             | 2            | 2.5918 | 0.1781 |
| SHEETDSTKEEAAK                      | 1562.6             | 2            | 4.5379 | 0.3944 |

| Peptide Sequence                      | Peptide mass (m/z) | Charge State | Xcorr  | DelCn2 |
|---------------------------------------|--------------------|--------------|--------|--------|
| SHEGETAYIR                            | 1163.2             | 2            | 3.1285 | 0.3299 |
| SHEGETSYIR                            | 1179.2             | 2            | 2.5454 | 0.2236 |
| SHENEAEALRGEIQSLKEENNR                | 2554.7             | 3            | 4.3129 | 0.3132 |
| SHESYAK                               | 821.9              | 1            | 1.7677 | 0.1152 |
| SHEVKAEGYEVAHGGR                      | 1726.8             | 3            | 3.6    | 0.3877 |
| SHFEQWGTLTDCVVMRDPNTR                 | 2621.9             | 3            | 3.2209 | 0.1032 |
| SHFGRDLMTDLKSEISGDLAR                 | 2349.6             | 3            | 4.3773 | 0.3082 |
| SHFNPLSLEELGSNTGIQVFNQIVK             | 2773.1             | 3            | 5.5187 | 0.4409 |
| SHFVAASLSNQK                          | 1289.4             | 2            | 3.8157 | 0.4349 |
| SHFVLIAGEPLREPVIQHGPVFMNTNEEISQAILDFR | 4206.8             | 3            | 5.626  | 0.4306 |
| SHGGIDVK                              | 812.9              | 1            | 2.2525 | 0.1808 |
| SHGLESVPVLPGSGEAGVSFDLPAQADTLHSANK    | 3389.7             | 3            | 5.2866 | 0.432  |
| SHGLFGLNENQLR                         | 1485.6             | 2            | 3.4018 | 0.2519 |
| SHGLLVQQALPK                          | 1291.5             | 2            | 3.9478 | 0.3745 |
| SHGQDYLVGNKLSR                        | 1574.7             | 2            | 4.3482 | 0.4843 |
| SHGSQETDEEFDAR                        | 1608.6             | 2            | 5.1629 | 0.519  |
| SHGVLGLYR                             | 1002.2             | 2            | 2.7137 | 0.2241 |
| SHHAASSTTAPTPAAR                      | 1577.7             | 2            | 4.5503 | 0.5067 |
| SHHYVLEPVFASALLK                      | 1812.1             | 2            | 3.3217 | 0.1046 |
| SHHYVLEPVFASALLKR                     | 1968.3             | 2            | 2.9974 | 0.1287 |
| SHIDKANFNNEK                          | 1417.5             | 2            | 3.4997 | 0.299  |
| SHIGVVPQDQTVLFDNTIADNIR               | 2425.7             | 3            | 3.7491 | 0.2282 |
| SHIMAAK                               | 757.9              | 1            | 2.2776 | 0.2372 |
| SHIQQLRVEEDVASDLVMKVDALLSAQPK         | 3221.7             | 3            | 4.4842 | 0.2395 |
| SHIQSLPDLSELLPNVTGGLAPLPSAGDLFSTD     | 3234.6             | 3            | 4.2898 | 0.4392 |
| SHKAESSELVR                           | 1243.4             | 2            | 2.7235 | 0.2944 |
| SHLEVPLEENVNRR                        | 1692.9             | 2            | 3.1641 | 0.2296 |
| SHLGNVHDQDN                           | 1236.2             | 2            | 3.3267 | 0.3135 |
| SHLIDKGMLTSTTEDE                      | 1777.9             | 2            | 4.0734 | 0.3604 |
| SHLKITDSAGHILYSKEDATK                 | 2315.6             | 3            | 4.5029 | 0.4008 |
| SHLLNCCPHDVLGTR                       | 1753.0             | 3            | 3.7701 | 0.3725 |
| SHLMYAVREEVEVLKEQIKELIEK              | 2915.4             | 3            | 3.8634 | 0.1852 |
| SHLVGVKPFADR                          | 1455.6             | 2            | 3.0739 | 0.2375 |
| SHLVHGSSPGVMGTSVATSASK                | 2098.3             | 3            | 3.3669 | 0.2397 |
| SHMAEESKNEYAAQLQR                     | 1993.1             | 3            | 3.835  | 0.2673 |
| SHMDDLNSENAKLDAELIQYREDLNQVITIK       | 3618.0             | 3            | 5.5679 | 0.2828 |



| Peptide Sequence                 | Peptide mass (m/z) | Charge State | Xcorr  | DelCn2 |
|----------------------------------|--------------------|--------------|--------|--------|
| SHMMDVQGSTQDSAIFKDFVLK           | 2338.6             | 2            | 6.4274 | 0.5105 |
| SHNVAAGSYEAPLPPGSFHGDFAYGTYR     | 2970.2             | 3            | 4.7982 | 0.405  |
| SHPEPQTPKDSPSK                   | 1535.6             | 2            | 2.8122 | 0.2887 |
| SHPETLHTASPHPGGAEEGDR            | 2284.3             | 3            | 3.4188 | 0.3059 |
| SHPLDPIDTVDFER                   | 1641.8             | 2            | 3.2533 | 0.2589 |
| SHPPLHEYADLNQLTQGDQEK            | 2421.6             | 3            | 3.639  | 0.109  |
| SHPSLQSEQIGIVK                   | 1523.7             | 2            | 2.8552 | 0.1511 |
| SHQDFSR                          | 876.9              | 1            | 2.2166 | 0.1583 |
| SHQGVVIASDWLVGGK                 | 1653.9             | 2            | 3.0477 | 0.2379 |
| SHQKPPQGMEIK                     | 1380.6             | 2            | 2.8199 | 0.1612 |
| SHQLIHAASLK                      | 1205.4             | 2            | 3.1658 | 0.3088 |
| SHQWFGASVR                       | 1175.3             | 2            | 2.5905 | 0.2556 |
| SHRDPYATSVGHLEIK                 | 1811.0             | 2            | 4.4242 | 0.3642 |
| SHREEMEAR                        | 1145.2             | 2            | 2.8411 | 0.1824 |
| SHRTEMDWVLK                      | 1402.6             | 2            | 2.7189 | 0.1743 |
| SHSAHFFFLTK                      | 1451.6             | 2            | 3.8913 | 0.4844 |
| SHSDNSPNAFK                      | 1204.2             | 2            | 3.2409 | 0.2549 |
| SHSDNSPNAFKDASSVPPPHVPPPVPPLRPR  | 3395.8             | 3            | 4.6029 | 0.354  |
| SHSGGIPGSLSGGISHNSMEVTK          | 2240.4             | 3            | 4.0403 | 0.3476 |
| SHSGMVK                          | 745.9              | 1            | 2.2278 | 0.1533 |
| SHSIFLINIK                       | 1172.4             | 2            | 2.7422 | 0.2465 |
| SHSIFLINVK                       | 1158.4             | 2            | 2.993  | 0.2785 |
| SHSIFLINVKQENTQTEQK              | 2245.5             | 3            | 3.8467 | 0.2404 |
| SHSLAQPFDFSGVETFSIHAEKPK         | 2740.0             | 3            | 3.5904 | 0.314  |
| SHLSQHTATSSK                     | 1371.4             | 2            | 3.5282 | 0.427  |
| SHSMETMVGQK                      | 1292.5             | 2            | 2.5676 | 0.2481 |
| SHSPSASQSGSQLR                   | 1429.5             | 2            | 3.5286 | 0.2905 |
| SHSPSSPDPDTPSPVGDSR              | 1922.9             | 2            | 4.604  | 0.46   |
| SHSQASLAGPGPVDPSNR               | 1777.9             | 2            | 3.9326 | 0.389  |
| SHSSESLGILKDYPHSAFTLEK           | 2447.7             | 3            | 3.3454 | 0.1196 |
| SHSSPASLQLGTGAGAAGSPAQQHAHLR     | 2695.9             | 3            | 4.1555 | 0.4201 |
| SHSTEPGLVLTGQGDVGQLGLGENVMER     | 2995.3             | 3            | 5.499  | 0.3962 |
| SHSYLRAIQAGYSQDDECIPMMTPSDITSTIR | 3589.0             | 3            | 3.8156 | 0.1704 |
| SHTALLR                          | 797.9              | 1            | 1.6274 | 0.1449 |
| SHTDIKVPDFSEYR                   | 1694.8             | 2            | 4.4326 | 0.3627 |
| SHTDQLVLIFAGK                    | 1429.6             | 2            | 2.5665 | 0.2752 |

| Peptide Sequence                  | Peptide mass (m/z) | Charge State | Xcorr  | DelCn2 |
|-----------------------------------|--------------------|--------------|--------|--------|
| SHTTEEDCTEELFDLHAR                | 2180.3             | 3            | 6.1381 | 0.4987 |
| SHTFPELAYRK                       | 1349.5             | 2            | 2.745  | 0.2372 |
| SHTLLSPSPKPK                      | 1292.5             | 2            | 2.6763 | 0.1792 |
| SHTSEGAHLDITPNSGAAGNSAGPK         | 2377.5             | 3            | 7.1854 | 0.4899 |
| SHTSLKDELSDVSQGGSK                | 1876.0             | 2            | 5.2919 | 0.479  |
| SHVAGQMLHGGGSR                    | 1394.5             | 2            | 4.0245 | 0.4243 |
| SHVEDGDIAGAPASSPEAPPAEQDPVQLK     | 2914.1             | 3            | 4.8555 | 0.1353 |
| SHVLQQTQR                         | 1097.2             | 2            | 2.8307 | 0.263  |
| SHVVREDLNPR                       | 1322.5             | 2            | 3.1723 | 0.2782 |
| SHYEEGPGK                         | 1004.0             | 2            | 2.8512 | 0.1808 |
| SHYEEGPGKNLPFSVENK                | 2033.2             | 2            | 5.2472 | 0.3998 |
| SHYKVGENADSQIK                    | 1576.7             | 2            | 4.2126 | 0.3897 |
| SIAADHKDLIHDVDFHGR                | 2281.5             | 3            | 4.2893 | 0.3204 |
| SIAAHLDNQVPVESPR                  | 1733.9             | 2            | 4.6007 | 0.4601 |
| SIAFPSIGSGR                       | 1092.2             | 1            | 3.2084 | 0.2893 |
| SIATLAITLLK                       | 1245.5             | 2            | 4.3258 | 0.2725 |
| SIATLMTDEIFHDVAYK                 | 1955.2             | 2            | 3.5373 | 0.3389 |
| SIATTLIDDTSSSEVLDELYR             | 2242.4             | 3            | 4.3593 | 0.2934 |
| SIDDLEEKVAHAKEENLSMHQMLDQTLLELNNM | 3841.3             | 3            | 4.8021 | 0.2984 |
| SIDGSIVLPLAR                      | 1241.5             | 2            | 2.5937 | 0.1982 |
| SIDLKDKYK                         | 1110.3             | 2            | 3.0208 | 0.207  |
| SIDNGIFVQLVQANSPASLVGLR           | 2399.7             | 3            | 5.0421 | 0.3689 |
| SIDQFANLVLHQTVER                  | 1871.1             | 2            | 2.9738 | 0.3292 |
| SIDSEKEAK                         | 1007.1             | 2            | 3.1965 | 0.1395 |
| SIEALLEAGQAR                      | 1258.4             | 2            | 3.3552 | 0.221  |
| SIEAVHEDIR                        | 1169.3             | 2            | 3.1947 | 0.1468 |
| SIEDFAHSSFQMALSK                  | 1799.0             | 2            | 5.0903 | 0.4162 |
| SIEEQLGTEIKPIPSNIDK               | 2112.4             | 2            | 5.0581 | 0.391  |
| SIEQLEKELLNGQK                    | 1629.8             | 2            | 3.3554 | 0.2598 |
| SIEQLEKELLNGQKLQGPETAR            | 2482.8             | 3            | 5.5652 | 0.3677 |
| SIEQSIEQEEGLNR                    | 1632.7             | 2            | 3.3609 | 0.2207 |
| SIFDFSALKELLSGPNR                 | 1895.1             | 2            | 5.3946 | 0.4221 |
| SIFDFSALKELLSGPNRLK               | 2136.5             | 2            | 3.3433 | 0.2547 |
| SIFDHIKLPQASK                     | 1484.7             | 2            | 3.2871 | 0.2253 |
| SIFEYEPGKSSILQHERPASLYQSSIDR      | 3239.5             | 3            | 4.091  | 0.2    |
| SIFEYEPGKSSILQHERPPPLPTTPTVPR     | 3372.8             | 3            | 4.3495 | 0.1261 |

| Peptide Sequence            | Peptide mass (m/z) | Charge State | Xcorr  | DelCn2 |
|-----------------------------|--------------------|--------------|--------|--------|
| SIFHQLANLPTDPPTIHK          | 2030.3             | 3            | 3.6076 | 0.2531 |
| SIFKPFIFVDDVK               | 1555.8             | 2            | 4.2543 | 0.3374 |
| SIFKPFIFVDDVKLVPK           | 1993.4             | 3            | 6.1602 | 0.5118 |
| SIFPIHPSFR                  | 1201.4             | 2            | 2.4863 | 0.1898 |
| SIFQHIQSAQSQR               | 1530.7             | 2            | 4.2275 | 0.411  |
| SIFSGIGSTAEPVSQSTTSDYQWDVSR | 2907.1             | 3            | 4.0442 | 0.3224 |
| SIFYVPDMKPSMFDVSR           | 2020.4             | 2            | 4.0636 | 0.4085 |
| SIGAIQYLHSINIAHR            | 1923.2             | 2            | 4.7605 | 0.43   |
| SIGTANRPMGAGEALR            | 1601.8             | 2            | 3.7815 | 0.2768 |
| SIGTANRPMGAGEALRR           | 1758.0             | 3            | 3.3511 | 0.2133 |
| SIGTGGIQDLKER               | 1374.5             | 2            | 3.1793 | 0.2256 |
| SIGVSNFNHR                  | 1131.2             | 2            | 2.9931 | 0.2403 |
| SIHANFSSGVGTTAASSK          | 1722.8             | 2            | 2.8542 | 0.3608 |
| SIHDALCVIR                  | 1127.3             | 2            | 3.0809 | 0.3695 |
| SIHEIPREELR                 | 1379.5             | 2            | 2.4576 | 0.1526 |
| SIIFANYIAR                  | 1168.4             | 2            | 2.9898 | 0.2695 |
| SIIGMGTGAGAYILTR            | 1581.9             | 2            | 3.1776 | 0.1478 |
| SIIKDYFHR                   | 1179.4             | 2            | 3.1225 | 0.2179 |
| SIIMRENFPTIVNFSAAEISDAIREK  | 3124.6             | 3            | 5.8028 | 0.407  |
| SIIQSAQQDSIKK               | 1446.6             | 2            | 2.6232 | 0.1605 |
| SISETSINKIDAEIASLK          | 1920.2             | 2            | 3.8989 | 0.1809 |
| SIISMFDRENK                 | 1340.5             | 2            | 3.7953 | 0.257  |
| SIITYVSSLYDAMPR             | 1717.0             | 2            | 3.8325 | 0.3248 |
| SIKADDKLI EEGVDSLNVK        | 2145.4             | 3            | 5.6482 | 0.4259 |
| SIKDTICNQDER                | 1422.5             | 2            | 2.6808 | 0.1833 |
| SIKENASAGVER                | 1261.4             | 2            | 3.2256 | 0.3567 |
| SILADDFLDFYLEYFPELK         | 2339.6             | 2            | 3.1787 | 0.2265 |
| SILAETEGMLR                 | 1220.4             | 2            | 3.5533 | 0.3365 |
| SILAETEGMLRDLQK             | 1705.0             | 2            | 4.5931 | 0.3434 |
| SILDQSISSFMR                | 1384.6             | 2            | 3.9032 | 0.3057 |
| SILEKDPSIHQAR               | 1494.7             | 2            | 3.6909 | 0.3148 |
| SILFVPTSAPR                 | 1188.4             | 2            | 3.5748 | 0.3235 |
| SILGTLTVEQIQDRDQFAK         | 2326.6             | 3            | 3.2489 | 0.2332 |
| SILHYIADKHNLFGK             | 1757.0             | 2            | 3.0813 | 0.2335 |
| SILLQSLIEGMEDR              | 1604.9             | 2            | 4.8283 | 0.304  |
| SILLSGTVLPSAQR              | 1442.7             | 2            | 3.6535 | 0.2713 |

| Peptide Sequence                   | Peptide mass (m/z) | Charge State | Xcorr  | DelCn2 |
|------------------------------------|--------------------|--------------|--------|--------|
| SILYDERSVHKVEPITK                  | 2015.3             | 3            | 3.6644 | 0.317  |
| SINAGGHKVGLELEA                    | 1679.9             | 2            | 4.1113 | 0.3906 |
| SINDNIAIFTEVQK                     | 1592.8             | 2            | 3.8904 | 0.3316 |
| SINDNIAIFTEVQKR                    | 1749.0             | 2            | 4.1929 | 0.3364 |
| SINGELYAPLQHVSAVLPGGAADR           | 2436.7             | 3            | 3.2487 | 0.1866 |
| SINPDEAVAYGAAVQAAILMGDK            | 2305.6             | 3            | 4.9653 | 0.4088 |
| SINPDEAVAYGAAVQAAILSGDK            | 2261.5             | 2            | 5.6378 | 0.4476 |
| SINPLGGFVHYGEVTNDFVMLK             | 2438.8             | 3            | 4.6398 | 0.3277 |
| SINQPVAFVR                         | 1131.3             | 2            | 3.1794 | 0.2304 |
| SINQQSGAHVELQR                     | 1567.7             | 2            | 3.5846 | 0.312  |
| SIPAYLAETLYYAMK                    | 1735.0             | 2            | 4.4842 | 0.4803 |
| SIPDGSEKGFIALDLGGSSFR              | 2269.5             | 2            | 3.779  | 0.3806 |
| SIPHITSDRLLIK                      | 1493.8             | 2            | 3.0746 | 0.1154 |
| SIPLDEGEDEAQR                      | 1459.5             | 2            | 3.1983 | 0.4455 |
| SIQAALDSAYKELTDLHK                 | 2004.2             | 3            | 3.6232 | 0.3412 |
| SIQAALDSAYKELTDLHKANAAKDSEAQEAALSR | 3617.9             | 3            | 6.1687 | 0.5128 |
| SIQADGLVWGSSK                      | 1348.5             | 2            | 4.9211 | 0.4555 |
| SIQEELQQLR                         | 1244.4             | 2            | 3.5373 | 0.1026 |
| SIQEIQLDKDDESLR                    | 1919.0             | 2            | 5.2044 | 0.3988 |
| SIQEIQLDKDDESLRK                   | 2047.2             | 2            | 5.3495 | 0.3397 |
| SIQEIQLDKDDESLRKYKEALLGR           | 2978.3             | 3            | 4.8789 | 0.4011 |
| SIQFVDWCPTGFK                      | 1528.8             | 2            | 4.2995 | 0.4221 |
| SIQLDGLVWGASK                      | 1374.6             | 2            | 4.506  | 0.3591 |
| SIQMLTLLR                          | 1075.4             | 2            | 2.9533 | 0.1801 |
| SIQQGFCFNILCVGETGIGK               | 2115.5             | 2            | 2.7334 | 0.1326 |
| SIRDTPAKNAQK                       | 1329.5             | 2            | 3.3575 | 0.2069 |
| SIRNEDKILTIEVK                     | 1658.9             | 3            | 4.569  | 0.2277 |
| SIRPDNMSEYSK                       | 1427.6             | 2            | 3.1348 | 0.1864 |
| SIRPGLSPYR                         | 1146.3             | 2            | 2.8245 | 0.2096 |
| SISFHPSGDFILVGTQHPTLR              | 2310.6             | 3            | 4.8467 | 0.3336 |
| SISGPSVGVMEMR                      | 1350.6             | 2            | 2.6471 | 0.2059 |
| SISHYHETLGEALQGVELEFSGLDIK         | 2874.2             | 3            | 5.0917 | 0.4487 |
| SISLYYTGEK                         | 1161.3             | 2            | 2.4934 | 0.1847 |
| SISLYYTGEKGQNQDYR                  | 2023.1             | 2            | 4.3153 | 0.3474 |
| SISQEQEKR                          | 1105.2             | 2            | 2.7957 | 0.1369 |
| SISQHYSKPR                         | 1203.3             | 2            | 2.9172 | 0.2446 |

| Peptide Sequence                  | Peptide mass (m/z) | Charge State | Xcorr  | DelCn2 |
|-----------------------------------|--------------------|--------------|--------|--------|
| SISTSLPVLDLIDAIAPNAVR             | 2166.5             | 3            | 4.7371 | 0.5166 |
| SISVIDSPGILSGEK                   | 1502.7             | 2            | 2.5084 | 0.1373 |
| SITDAHPPGTAILHIK                  | 1671.9             | 2            | 2.6517 | 0.135  |
| SITHDIEEK                         | 1072.2             | 2            | 2.69   | 0.146  |
| SITHDIEEKGVR                      | 1384.5             | 2            | 3.2686 | 0.2501 |
| SITHFGRPPFEPFFNSLQEVHPQVR         | 2968.3             | 3            | 5.6244 | 0.511  |
| SITNSAVLSLQFQINGMHPQLLELLNQLDER   | 3598.0             | 3            | 5.5374 | 0.4268 |
| SITPNEKQPEHLGLDQYIIKR             | 2480.8             | 3            | 3.7557 | 0.2325 |
| SITVTQDEGIRPSTTMEGLAK             | 2235.5             | 2            | 4.5647 | 0.2869 |
| SIVDAYVLLNLGDSVTTDHISPAGNIAR      | 2913.2             | 3            | 4.3655 | 0.3837 |
| SIVDFVKDHGNIK                     | 1472.7             | 2            | 3.852  | 0.3877 |
| SIVDKEGVPR                        | 1100.3             | 2            | 3.0002 | 0.2127 |
| SIVDLYTGNAEEDADTK                 | 1841.9             | 2            | 5.3759 | 0.502  |
| SIVDYKPNLDLLEQQHQLIQEALIFDNK      | 3326.7             | 3            | 5.1167 | 0.4391 |
| SIVEEIEDLVAR                      | 1373.5             | 2            | 4.5148 | 0.2682 |
| SIVEGIIEEEEDEEGSESISKR            | 2594.7             | 3            | 3.3618 | 0.1333 |
| SIVEHVASKLNIPATNVFANR             | 2281.6             | 3            | 3.8214 | 0.1008 |
| SIVIRPLEPQPAPHLAR                 | 1895.2             | 3            | 4.6061 | 0.3388 |
| SIVPQGGSHSLR                      | 1238.4             | 2            | 2.7782 | 0.2803 |
| SIVPTMHYQDSLPR                    | 1644.9             | 2            | 3.2204 | 0.336  |
| SIVSELAGLLSAMEYVQK                | 1939.3             | 2            | 4.3494 | 0.4052 |
| SIVVIHPDTGR                       | 1194.4             | 2            | 2.7712 | 0.3266 |
| SIWAFGPDATGPNILVDDTLPSEVDKALLGSVK | 3427.8             | 3            | 3.21   | 0.1743 |
| SIYDDISSPGLGSTPLTSR               | 1967.1             | 2            | 5.3483 | 0.4932 |
| SIYFQPPSFYVSAQDLPHIENGGVAVLTGKK   | 3364.8             | 3            | 3.5415 | 0.1392 |
| SIYGEKFEDEFILK                    | 1833.0             | 2            | 5.348  | 0.4063 |
| SIYGERFPDENFK                     | 1602.7             | 2            | 3.7056 | 0.2547 |
| SIYGERFPDENFKLK                   | 1844.1             | 2            | 3.4359 | 0.1984 |
| SIYGSRFPDENFTLK                   | 1775.0             | 2            | 4.3147 | 0.2829 |
| SIYYITGESK                        | 1161.3             | 2            | 3.2313 | 0.3004 |
| SIYYITGESKEQVANSFAFVER            | 2392.6             | 3            | 5.9774 | 0.5569 |
| SKAAWEAGKFGNEVIPVTVTVK            | 2332.7             | 2            | 5.5133 | 0.4717 |
| SKADYTSHLR                        | 1178.3             | 2            | 2.8325 | 0.1065 |
| SKAEELGLPILGVLR                   | 1595.9             | 3            | 4.4447 | 0.3758 |
| SKAEVVVSFVK                       | 1223.4             | 2            | 2.5977 | 0.1148 |
| SKAELMEISEDKTK                    | 1609.8             | 2            | 4.9299 | 0.4425 |

| Peptide Sequence              | Peptide mass (m/z) | Charge State | Xcorr  | DelCn2 |
|-------------------------------|--------------------|--------------|--------|--------|
| SKAGLAYHLR                    | 1116.3             | 2            | 2.4934 | 0.1534 |
| SKAMTGVEQWPYR                 | 1553.8             | 2            | 2.7497 | 0.1944 |
| SKCEELSGLHGQLQEAR             | 1886.1             | 2            | 5.126  | 0.4286 |
| SKDDQVTVIGAGVTLHEALAAAELLK    | 2651.0             | 3            | 7.0263 | 0.502  |
| SKDDQVTVIGAGVTLHEALAAAELLKK   | 2779.2             | 3            | 7.9431 | 0.5736 |
| SKDDQVTVIGAGVTLHEALAAAELLKKEK | 3036.5             | 3            | 4.1383 | 0.283  |
| SKDHFGLEGDEESTMLEDSVSPK       | 2538.7             | 3            | 5.1375 | 0.3741 |
| SKDHFGLEGDEESTMLEDSVSPKK      | 2666.9             | 3            | 3.8332 | 0.2398 |
| SKDIALHLNPR                   | 1264.5             | 2            | 3.0366 | 0.3063 |
| SKDIVLVAYSALGSHR              | 1717.0             | 3            | 5.7194 | 0.4573 |
| SKDIVLVAYSALGSQR              | 1708.0             | 2            | 5.9082 | 0.5566 |
| SKDKEEGKEER                   | 1335.4             | 2            | 3.5086 | 0.2783 |
| SKDKLDQVSSEIK                 | 1477.6             | 2            | 4.2031 | 0.268  |
| SKDKLDQVSSEIKEK               | 1734.9             | 2            | 5.0199 | 0.4319 |
| SKDLAEVGEVGGGHSQAR            | 1698.8             | 2            | 5.1593 | 0.4574 |
| SKDQDDQKPGPSER                | 1587.6             | 2            | 4.5796 | 0.3457 |
| SKDQFEFALTAVAEVNAILK          | 2324.6             | 3            | 5.2641 | 0.4587 |
| SKDSATAQAWFSAIHSNVNDLLTR      | 2633.9             | 3            | 4.7735 | 0.3525 |
| SKDTVSEDTIR                   | 1251.3             | 2            | 3.0031 | 0.2701 |
| SKDVNGPEPLNSR                 | 1413.5             | 2            | 3.9715 | 0.3253 |
| SKDYEFMWNPHLGYILTCPSNLGTGLR   | 3114.5             | 3            | 5.3079 | 0.3156 |
| SKEAEAAFLNVYKR                | 1626.8             | 2            | 2.4031 | 0.2216 |
| SKEAYEKDEQINLLKEELDQQNK       | 2794.0             | 3            | 4.1716 | 0.1544 |
| SKEEAFDAICQLVAGKEPANVGVTK     | 2605.9             | 3            | 5.3993 | 0.4558 |
| SKEEDKHLK                     | 1114.2             | 2            | 2.7122 | 0.1748 |
| SKEEELKALEDRLSESAK            | 2263.4             | 3            | 4.0476 | 0.3395 |
| SKEFAQIIK                     | 1064.3             | 2            | 2.8741 | 0.1795 |
| SKEFQLFSSPHGK                 | 1492.7             | 2            | 3.6123 | 0.3942 |
| SKEGKEAGSEPAPEQESTEATPAE      | 2460.5             | 3            | 3.2403 | 0.2148 |
| SKEIENGHIFTVNDQFTSK           | 2195.4             | 3            | 4.3372 | 0.3558 |
| SKEISQFLNR                    | 1222.4             | 2            | 2.6864 | 0.1578 |
| SKELDNFCNPIIYKPKPK            | 2135.5             | 2            | 4.8748 | 0.4062 |
| SKENHADLGIFVK                 | 1458.6             | 2            | 2.9782 | 0.2536 |
| SKENISLLEK                    | 1161.3             | 2            | 2.9323 | 0.1623 |
| SKENISLLEKEREDLYAK            | 2166.4             | 2            | 4.5475 | 0.3976 |
| SKENVLYK                      | 981.1              | 2            | 2.5756 | 0.1271 |

| Peptide Sequence                       | Peptide mass (m/z) | Charge State | Xcorr  | DelCn2 |
|----------------------------------------|--------------------|--------------|--------|--------|
| SKEPQLIAFYHK                           | 1461.7             | 3            | 3.7404 | 0.1954 |
| SKEQAELEAAR                            | 1232.3             | 2            | 3.5462 | 0.2319 |
| SKESDEPHHSK                            | 1281.3             | 2            | 2.6199 | 0.1431 |
| SKESVPEFPLSPPK                         | 1542.8             | 2            | 3.7827 | 0.3407 |
| SKETQEELNK                             | 1206.3             | 2            | 3.4949 | 0.1428 |
| SKEVDKLIR                              | 1088.3             | 2            | 2.5587 | 0.1121 |
| SKFADLSEAANR                           | 1309.4             | 2            | 3.2921 | 0.2861 |
| SKFALITWIGENVSGLQR                     | 2020.3             | 2            | 5.9895 | 0.4746 |
| SKFKDLEDK                              | 1110.2             | 2            | 3.0501 | 0.2339 |
| SKFVESDADEELLFNIPFTGNVK                | 2600.9             | 3            | 3.7503 | 0.2005 |
| SKFVLVKFDTQYPYGEKQDEFKR                | 2854.2             | 3            | 4.256  | 0.2966 |
| SKGAVAIADAIR                           | 1172.4             | 2            | 3.268  | 0.2856 |
| SKGEGRPPEK PSSNLLLEEAAKPK              | 2521.8             | 3            | 4.4835 | 0.29   |
| SKGGIEIVKEK                            | 1188.4             | 2            | 3.2006 | 0.2245 |
| SKGGVVGIK                              | 845.0              | 1            | 2.012  | 0.1297 |
| SKGGVVGIKVDK                           | 1187.4             | 2            | 4.0742 | 0.3854 |
| SKGGVVGIKVDKGVVPLAGTNGETTTQGLDGLSER    | 3441.8             | 3            | 7.2943 | 0.5217 |
| SKGHGFITPADGGPDIFLHISDVEGEYVPVEGDEVTYK | 4077.4             | 3            | 6.8965 | 0.5491 |
| SKGIAYIEFK                             | 1156.4             | 2            | 2.7391 | 0.2597 |
| SKGIYQSLEGAVQAGQLK                     | 1878.1             | 2            | 5.213  | 0.3987 |
| SKGLAPDLPEDLYHLLIK                     | 1910.2             | 3            | 5.2457 | 0.4448 |
| SKGLAPDLPEDLYHLLIKK                    | 2038.4             | 3            | 4.2251 | 0.3011 |
| SKGPSAAGEQEPDKESGASVDEVAR              | 2502.6             | 3            | 5.3714 | 0.4844 |
| SKGPSAGEQEPDKESGASVDEVAR               | 2431.5             | 3            | 5.2731 | 0.4045 |
| SKGQENDHVHEK                           | 1408.5             | 2            | 3.6023 | 0.3355 |
| SKGQESFKKQEK                           | 1424.6             | 2            | 3.4735 | 0.1134 |
| SKHEEEAVQK                             | 1185.3             | 2            | 2.9875 | 0.1794 |
| SKHQTTSTSKPASFQQPLGSNQALGQAMSSAAAYR    | 3639.0             | 3            | 4.0702 | 0.1733 |
| SKHSEQDELMADISKR                       | 1875.1             | 2            | 4.3625 | 0.3922 |
| SKIEDYFPEFAR                           | 1502.7             | 2            | 3.9609 | 0.3885 |
| SKIGSTDNIKYQPK                         | 1579.8             | 2            | 3.0364 | 0.2924 |
| SKINVNEIFYDLVR                         | 1711.0             | 2            | 4.8066 | 0.4321 |
| SKISVNDFIK                             | 1264.5             | 2            | 2.8863 | 0.2038 |
| SKITVTSEVPFSKR                         | 1579.8             | 2            | 3.1024 | 0.1769 |
| SKKDQGELER                             | 1190.3             | 2            | 3.5443 | 0.2029 |
| SKKDQGELERQLLQANPILEAFGNAK             | 2899.3             | 3            | 3.9603 | 0.2454 |

| Peptide Sequence                 | Peptide mass (m/z) | Charge State | Xcorr  | DelCn2 |
|----------------------------------|--------------------|--------------|--------|--------|
| SKKEQVPSGAELER                   | 1558.7             | 2            | 3.9083 | 0.35   |
| SKKNEIMVAPDKDYFLIVIQNPTE         | 2794.2             | 2            | 2.9572 | 0.318  |
| SKKPAGGVDFDET                    | 1351.4             | 2            | 2.9677 | 0.2725 |
| SKKVEEAEPPEEFVVEK                | 1878.1             | 2            | 4.8463 | 0.3469 |
| SKLAAAILGGVDQIHIKPGAK            | 2088.5             | 2            | 4.4005 | 0.3222 |
| SKLANILFTR                       | 1163.4             | 2            | 2.6905 | 0.143  |
| SKLDAEVSKWDDSGNDIIVLAK           | 2404.7             | 3            | 5.389  | 0.3642 |
| SKLDKAEDQHLVEMEDTLNKLQEAIEK      | 3156.5             | 3            | 3.6175 | 0.1724 |
| SKLDSLASDHQK                     | 1329.4             | 2            | 3.8298 | 0.3303 |
| SKLEDIANAALAASAVTQVAK            | 2072.3             | 2            | 5.4868 | 0.4854 |
| SKLESELANFGPR                    | 1448.6             | 2            | 3.3695 | 0.2124 |
| SKLETLPKEDLIK                    | 1514.8             | 2            | 3.173  | 0.1253 |
| SKLGESQTLQQFSR                   | 1609.8             | 2            | 3.8274 | 0.25   |
| SKLHEMEGAVK                      | 1229.4             | 2            | 2.6853 | 0.1475 |
| SKLILFPR                         | 974.2              | 2            | 2.8964 | 0.2264 |
| SKLNHNAAFMQIPMGLEGNFK            | 2348.7             | 2            | 4.7241 | 0.4302 |
| SKLPPKPVQDLIK                    | 1366.7             | 2            | 2.6762 | 0.1439 |
| SKLQSQLLSLEK                     | 1374.6             | 2            | 3.4214 | 0.2216 |
| SKLQSQLLSLEKEVEEYKNFRPDDPTR      | 3251.6             | 3            | 3.544  | 0.2719 |
| SKLSQLHESR                       | 1185.3             | 2            | 3.0048 | 0.2905 |
| SKLSQTEDR                        | 1064.1             | 2            | 3.0693 | 0.2271 |
| SKLTFSCGGSDNFK                   | 1604.8             | 2            | 4.307  | 0.4216 |
| SKLVEVIEEVNK                     | 1387.6             | 2            | 3.9884 | 0.3361 |
| SKLVEVIEEVNKVK                   | 1614.9             | 2            | 3.5705 | 0.3499 |
| SKLVEVIEEVNKVKQEK                | 2000.3             | 2            | 4.9647 | 0.4177 |
| SKPDLESSLESVDFLR                 | 1936.2             | 2            | 4.3639 | 0.4844 |
| SKPELPPGLSPEATAPVTPSRPEGGEPGLSK  | 3084.4             | 3            | 4.0133 | 0.3152 |
| SKPGAAMVEMADGYAVDR               | 1869.1             | 2            | 5.0923 | 0.5466 |
| SKPIIAEPEIHGAQPLDGVTGFLVLMSEGLYK | 3412.0             | 3            | 3.7332 | 0.3286 |
| SKPIPIMPASPQKGHAVNLLDVPVVAR      | 2933.5             | 3            | 4.0136 | 0.2686 |
| SKPLAASPKPAGLKESSDK              | 1912.2             | 2            | 3.5543 | 0.2403 |
| SKPLAASPKPAGLKESSDKVSR           | 2254.6             | 3            | 3.938  | 0.4588 |
| SKPQIAALKEETEEVQDTRL             | 2415.6             | 3            | 3.6268 | 0.3295 |
| SKPVFSESLSD                      | 1196.3             | 2            | 2.6024 | 0.2674 |
| SKQEALKNDLVEALK                  | 1686.9             | 2            | 4.4175 | 0.2628 |
| SKQEALKNDLVEALKR                 | 1843.1             | 2            | 5.1615 | 0.4    |



| Peptide Sequence                        | Peptide mass (m/z) | Charge State | Xcorr  | DelCn2 |
|-----------------------------------------|--------------------|--------------|--------|--------|
| SKQLEDELVSLQK                           | 1517.7             | 2            | 4.3844 | 0.3029 |
| SKQLEDELVSLQKK                          | 1645.9             | 2            | 4.7512 | 0.2697 |
| SKRDPTEEIEILLR                          | 1699.9             | 3            | 4.6233 | 0.3323 |
| SKREQEVTELKK                            | 1475.7             | 2            | 3.5597 | 0.1294 |
| SKSDPIMLLK                              | 1132.4             | 2            | 2.6442 | 0.1182 |
| SKSEEHAEDSVMDHHFR                       | 2113.2             | 3            | 6.1732 | 0.4573 |
| SKSLESQVENLQK                           | 1490.6             | 2            | 2.7819 | 0.1115 |
| SKTADVTSLFGGEDTSR                       | 1771.9             | 2            | 3.4654 | 0.3588 |
| SKTAVYKVPPTFFHVK                        | 1850.2             | 2            | 2.4601 | 0.197  |
| SKTDGSQKTESSTEGKEQEEK                   | 2314.4             | 3            | 3.4652 | 0.2855 |
| SKTFNPGAGLPTDKK                         | 1561.8             | 2            | 3.7301 | 0.3194 |
| SKTHAVLVALK                             | 1167.4             | 2            | 3.1    | 0.3665 |
| SKTIVQLKPR                              | 1170.4             | 2            | 2.7609 | 0.2338 |
| SKTKEQILEEFSK                           | 1567.8             | 2            | 3.9759 | 0.3356 |
| SKTVTSFYNQSAIDAAAEKPSVR                 | 2471.7             | 3            | 3.3307 | 0.2118 |
| SKVDEAVAVLQAHHAK                        | 1703.9             | 2            | 5.4861 | 0.5133 |
| SKVDEAVAVLQAHQAK                        | 1694.9             | 2            | 4.5623 | 0.4568 |
| SKVDKGSAAEEKIDALLSSSQIR                 | 2491.7             | 3            | 3.3412 | 0.153  |
| SKVEILEAEVMQLR                          | 1645.9             | 2            | 2.7405 | 0.1068 |
| SKVELIAYFEK                             | 1327.6             | 2            | 3.579  | 0.3442 |
| SKVGGTKPAGGDFGEVLNSAANASATTTEPLPEKTQESL | 3862.2             | 3            | 5.8537 | 0.3621 |
| SKVTLLEGDHVR                            | 1354.5             | 2            | 4.0206 | 0.3385 |
| SKVYEDPALSAIFLHNNYNYILK                 | 2714.1             | 3            | 3.3426 | 0.1654 |
| SKYEALQTFAR                             | 1314.5             | 2            | 2.7967 | 0.2483 |
| SKYHPDEVGK                              | 1160.3             | 2            | 3.4503 | 0.2561 |
| SKYHPDEVGKR                             | 1316.4             | 2            | 2.7815 | 0.1755 |
| SKYTTSPGSEVR                            | 1225.3             | 2            | 3.1679 | 0.2902 |
| SLAAAAGK                                | 688.8              | 1            | 2.1795 | 0.115  |
| SLAAAAGKQELAK                           | 1258.4             | 2            | 4.2405 | 0.344  |
| SLAAALAQHSVPLQLELR                      | 1918.2             | 2            | 4.2183 | 0.3953 |
| SLAEEEEAAR                              | 1047.1             | 2            | 2.8355 | 0.1857 |
| SLAALSQIAYQR                            | 1321.5             | 2            | 3.6364 | 0.3556 |
| SLADELALVDVLEDK                         | 1630.8             | 2            | 4.194  | 0.3837 |
| SLADELALVDVLEDKLLK                      | 1872.1             | 2            | 4.9131 | 0.3583 |
| SLADELALVDVLEDKLLKGEMMDLQHGSFLQTPK      | 3786.4             | 3            | 6.1519 | 0.444  |
| SLADIAREEASNFR                          | 1579.7             | 3            | 3.6517 | 0.3628 |

| Peptide Sequence                      | Peptide mass (m/z) | Charge State | Xcorr  | DelCn2 |
|---------------------------------------|--------------------|--------------|--------|--------|
| SLADIGKTVSSASR                        | 1392.5             | 2            | 3.2134 | 0.3808 |
| SLAEDFAEQPIKDAVITVPVFFNQAER           | 3036.4             | 2            | 4.0807 | 0.257  |
| SLAEDFAEQPIKDAVITVPVFFNQAERR          | 3192.6             | 3            | 5.2266 | 0.476  |
| SLAEEQYQDFEAR                         | 1586.6             | 2            | 3.3297 | 0.1886 |
| SLAEGNLLYQPQLDTLK                     | 1904.2             | 2            | 3.9839 | 0.2244 |
| SLAEIVKKDDFVLDSEYLVTLVVVVPK           | 3034.6             | 3            | 3.7568 | 0.1227 |
| SLAGSSGPGASSGTSGDHGELVVR              | 2186.3             | 2            | 5.5886 | 0.508  |
| SLAHLALNDVSLQALPGDVGNLANLVTLELRENLLK  | 3826.4             | 3            | 5.3856 | 0.4252 |
| SLAHLETLSHSFILSLK                     | 1897.2             | 2            | 4.023  | 0.3361 |
| SLAMEMVLTGDR                          | 1323.6             | 2            | 3.3308 | 0.2888 |
| SLAMEMVLTGDRISAQDAK                   | 2037.3             | 2            | 5.1851 | 0.3888 |
| SLAMLGSSSEDNTALSR                     | 1652.8             | 2            | 4.6028 | 0.4246 |
| SLAQAEAEKQKEEAER                      | 1817.9             | 2            | 4.9311 | 0.4243 |
| SLAQAEAEKQKEEAEREAR                   | 2174.3             | 3            | 4.6203 | 0.2918 |
| SLAQHIPGPGGIEGVK                      | 1560.8             | 2            | 2.9273 | 0.1534 |
| SLAQHIPGPGGIEGVKGAASGVVVELAR          | 2629.0             | 3            | 4.5973 | 0.4057 |
| SLASDITDEQKK                          | 1335.4             | 2            | 3.0157 | 0.3141 |
| SLATTRPTVNADDLLK                      | 1715.9             | 2            | 3.4948 | 0.1753 |
| SLAVLTYDHSR                           | 1262.4             | 2            | 2.694  | 0.1242 |
| SLAVSGLGVIGR                          | 1129.3             | 2            | 3.9534 | 0.4093 |
| SLAYLTAATHGLDEEAESLKETFDPKETIPDIDPNAK | 4161.5             | 3            | 4.5212 | 0.3407 |
| SLDADEFRQGLAK                         | 1450.6             | 2            | 3.3324 | 0.2597 |
| SLDAQSVYVATDSESYVPELQQLFK             | 2819.1             | 3            | 3.9961 | 0.2501 |
| SLDDGKVSRR                            | 977.1              | 2            | 2.4063 | 0.1565 |
| SLDDVIKR                              | 946.1              | 2            | 2.6686 | 0.2421 |
| SLDDVIKRANNTFYGLSAGVFTK               | 2517.8             | 2            | 3.4908 | 0.2688 |
| SLDEISQPAQELKR                        | 1614.8             | 2            | 3.9507 | 0.3499 |
| SLDFLIELLHKDQLDETVNVEPLTK             | 2911.3             | 3            | 5.3875 | 0.3564 |
| SLDIQVPNFPADETK                       | 1674.8             | 2            | 3.2596 | 0.1311 |
| SLDIQVPNFPADETKGFHQVPPFAPIVFIER       | 3413.9             | 3            | 4.9146 | 0.3499 |
| SLDKDPLLLSGTHVMEGSGR                  | 2113.4             | 3            | 3.2196 | 0.2685 |
| SLDKDPMLLSGTHVMEGSGR                  | 2131.4             | 3            | 3.4504 | 0.1242 |
| SLDLDGIIAEVK                          | 1273.5             | 2            | 4.7879 | 0.3349 |
| SLDLDGIIAEVKAQYEEMAK                  | 2224.5             | 2            | 4.7867 | 0.3344 |
| SLDLDISKTNVNGGAIALGHPLGGSGSR          | 2708.0             | 3            | 7.1966 | 0.5758 |
| SLDLFNCEVTNLNDYR                      | 1917.1             | 2            | 4.7402 | 0.4191 |

| Peptide Sequence                    | Peptide mass (m/z) | Charge State | Xcorr  | DelCn2 |
|-------------------------------------|--------------------|--------------|--------|--------|
| SLDMDSIIAEVK                        | 1321.5             | 2            | 4.8027 | 0.3562 |
| SLDMDSIIAEVKAQYEDIANR               | 2382.6             | 3            | 5.6961 | 0.5051 |
| SLDMDSIIAEVKAQYEDIANRSR             | 2625.9             | 3            | 3.3189 | 0.1269 |
| SLDNFFAKR                           | 1098.2             | 2            | 2.4456 | 0.1417 |
| SLDNNYSTPNER                        | 1410.4             | 2            | 2.9596 | 0.2049 |
| SLDPENSETELER                       | 1519.6             | 2            | 4.5643 | 0.3839 |
| SLDVRQEELGAVVDKEMAATSAAIEDAVR       | 3075.4             | 3            | 5.8579 | 0.4133 |
| SLDWQIDVDLLNK                       | 1559.7             | 2            | 2.9487 | 0.2357 |
| SLEAASEK                            | 834.9              | 1            | 1.8731 | 0.1385 |
| SLEAASEKYSEKEDKYEEEEIK              | 2506.7             | 3            | 5.6912 | 0.3494 |
| SLEAASEKYSEKEDKYEEEEIKLLSDK         | 3063.3             | 3            | 4.6007 | 0.2632 |
| SLEAASEKYSEKEDKYEEEEIKLLSDKLK       | 3304.6             | 3            | 5.088  | 0.3747 |
| SLEAASEKYSEKEDKYEEEEIKLLSDKLKEAETR  | 3891.2             | 3            | 4.9475 | 0.3837 |
| SLEADLMQLQEDLAAAER                  | 2004.2             | 2            | 3.5094 | 0.2428 |
| SLEAEGFQVTYLPVQK                    | 1810.0             | 2            | 4.0992 | 0.3338 |
| SLEAEILQLQEELASSER                  | 2046.2             | 2            | 5.8274 | 0.4951 |
| SLEAIELGLGEAQVILALSSHLGAVESEKQK     | 3221.6             | 3            | 3.4402 | 0.2704 |
| SLEAQVAHADQQLR                      | 1566.7             | 2            | 4.5299 | 0.41   |
| SLEAQVAHADQQLRDLGK                  | 1980.2             | 3            | 4.112  | 0.3983 |
| SLEAQVAHADQQLRDLGKQVATDALK          | 2954.3             | 3            | 5.042  | 0.3128 |
| SLEDALRQTASVTLQAIAAQNAAVQAVNAHSNILK | 3619.0             | 3            | 7.0968 | 0.5509 |
| SLEDALSSDTSGHFR                     | 1622.7             | 2            | 4.4206 | 0.4842 |
| SLEDALSSDTSGHFRR                    | 1778.9             | 2            | 2.8982 | 0.176  |
| SLEDDIRSDTSFMFQR                    | 1948.1             | 3            | 4.7607 | 0.3494 |
| SLEDLKLK                            | 946.1              | 2            | 2.5424 | 0.1305 |
| SLEDLQDEYDFK                        | 1502.6             | 2            | 2.957  | 0.252  |
| SLEDQVEMLR                          | 1220.4             | 2            | 3.7545 | 0.3136 |
| SLEDVTAEYIHKAHEK                    | 2000.2             | 2            | 3.3106 | 0.2903 |
| SLEEAAYSR                           | 1155.2             | 2            | 2.5456 | 0.2922 |
| SLEEFNDVYLVTHLMGADLNNIVK            | 2736.1             | 3            | 3.6533 | 0.1063 |
| SLEEIYLFSLPIKESIIDFFLGASLKDEVLK     | 3688.3             | 3            | 5.1863 | 0.145  |
| SLEEKNESLTHEPR                      | 1669.8             | 2            | 3.5545 | 0.3463 |
| SLEELPVDIILASVG                     | 1555.8             | 2            | 2.7095 | 0.2678 |
| SLEELRLEDYQANR                      | 1736.9             | 3            | 4.0212 | 0.2691 |
| SLEENLATAKHDLLR                     | 1710.9             | 2            | 3.7046 | 0.1951 |
| SLEGDLEDLKDQIAQLEASLAAAK            | 2529.8             | 3            | 6.172  | 0.4098 |

| Peptide Sequence                   | Peptide mass (m/z) | Charge State | Xcorr  | DelCn2 |
|------------------------------------|--------------------|--------------|--------|--------|
| SLEGDLEDLKDQIAQLEASLAAAKK          | 2658.0             | 3            | 6.4646 | 0.4297 |
| SLEIEEKINK                         | 1203.4             | 2            | 2.9951 | 0.106  |
| SLELYRELDLNSVLLK                   | 1906.2             | 3            | 5.6266 | 0.3347 |
| SLENYHFVDEHGK                      | 1575.7             | 2            | 3.4507 | 0.3684 |
| SLENYHFVDEHGKDQGINIR               | 2372.5             | 3            | 5.5988 | 0.4986 |
| SLEQYDQVLDGAHGASLTDLANLSEGVSLAER   | 3360.6             | 3            | 6.2104 | 0.502  |
| SLERAEAGDNLGALVR                   | 1671.8             | 2            | 3.2295 | 0.1388 |
| SLERPMSSASMASDFR                   | 1773.0             | 2            | 3.4015 | 0.3331 |
| SLERPMSSASMASDFRK                  | 1901.2             | 3            | 4.9963 | 0.2889 |
| SLESLDTSLFAK                       | 1311.5             | 2            | 4.0877 | 0.3075 |
| SLESLHSFVAAATK                     | 1461.6             | 2            | 3.8901 | 0.3659 |
| SLESQVENLQK                        | 1275.4             | 2            | 2.8599 | 0.196  |
| SLETEHKALTSEIALLQSR                | 2127.4             | 2            | 5.8373 | 0.4405 |
| SLETEILESJK                        | 1262.4             | 2            | 2.9253 | 0.2611 |
| SLETENAGLR                         | 1090.2             | 2            | 3.4261 | 0.2734 |
| SLETVYLER                          | 1110.2             | 2            | 2.7875 | 0.2507 |
| SLETVYLERNPLQK                     | 1690.9             | 2            | 3.4425 | 0.2511 |
| SLETVYLERNPLQKDPQYR                | 2350.6             | 3            | 4.3335 | 0.268  |
| SLEVTFTPVIIDIGK                    | 1648.9             | 2            | 3.0695 | 0.2736 |
| SLFDDKAVEIEELTYIIKQDINSLNK         | 3040.4             | 3            | 4.7051 | 0.2945 |
| SLFDYFLTDLK                        | 1362.6             | 2            | 3.2798 | 0.2338 |
| SLFFPDEAINKHPR                     | 1671.9             | 2            | 3.1348 | 0.2515 |
| SLFGHTVGGGAAGVVSR                  | 1515.7             | 2            | 4.3232 | 0.3847 |
| SLFNRAEGPPEPSR                     | 1557.7             | 2            | 2.8158 | 0.1712 |
| SLFSSIGEVESAK                      | 1354.5             | 2            | 3.6369 | 0.2938 |
| SLFVQELLLSTLVR                     | 1618.9             | 2            | 3.822  | 0.2739 |
| SLGAEHVITEEELR                     | 1583.7             | 2            | 3.7924 | 0.3094 |
| SLGAEPLEVDLK                       | 1271.4             | 2            | 3.288  | 0.2245 |
| SLGALTGPQLLSLAQSPAGSHVLDAILTSPSVTR | 3359.8             | 3            | 3.3252 | 0.2087 |
| SLGDDISSETSGDFR                    | 1586.6             | 2            | 4.5861 | 0.3822 |
| SLGDDISSETSGDFRK                   | 1714.8             | 2            | 4.0753 | 0.3336 |
| SLGEIPIVESEIKK                     | 1542.8             | 2            | 3.2711 | 0.2531 |
| SLGEIPIVESEIKKEAGELKPEEEITVGPVQK   | 3477.9             | 3            | 6.0106 | 0.4561 |
| SLGELGLEHFQAPLVR                   | 1767.0             | 2            | 4.0983 | 0.359  |
| SLGETQLVLYGDVEELKR                 | 2050.3             | 2            | 4.879  | 0.4124 |
| SLGHSRGEADLFDSDGIFSTGTGSQSVER      | 3014.1             | 3            | 5.3534 | 0.4101 |

| Peptide Sequence                           | Peptide mass (m/z) | Charge State | Xcorr  | DelCn2 |
|--------------------------------------------|--------------------|--------------|--------|--------|
| SLGKGSAPPGVPPEGSIR                         | 1706.9             | 3            | 3.7378 | 0.3563 |
| SLGLFGLQVPEEYGG LGFSNTMYSR                 | 2724.0             | 3            | 3.7832 | 0.1984 |
| SLGLSLSGGDQEDAGR                           | 1562.6             | 2            | 3.0368 | 0.1733 |
| SLGLVDRNNEPLTHAMYNLASLR                    | 2585.9             | 3            | 4.1163 | 0.3059 |
| SLGNVIDPLDVIYGISLQGLHNQLLNSNLDPSEVEK       | 3906.3             | 3            | 7.8744 | 0.5211 |
| SLGNVIDPLDVIYGISLQGLHNQLLNSNLDPSEVEKAK     | 4105.6             | 3            | 4.5776 | 0.3962 |
| SLGNVIDPLDVIYGISLQGLHNQLLNSNLDPSEVEKAKEGQK | 4548.1             | 3            | 4.6223 | 0.3421 |
| SLGNVIHPDVVVNGGQDQSKEPPYGADVLR             | 3162.5             | 3            | 6.6314 | 0.4087 |
| SLGPAAPIIDSPYGDPIDPEDAPESITR               | 2895.1             | 3            | 3.804  | 0.1012 |
| SLGQNPTEAELQDMINEVDADGNGTIDFPEFLTMMAR      | 4072.5             | 3            | 4.7283 | 0.2996 |
| SLGSAGPSGTLPR                              | 1200.3             | 2            | 2.7236 | 0.2654 |
| SLGSLASLHPRPGE GPGHSASAAGA QAR             | 2640.9             | 3            | 3.4937 | 0.1465 |
| SLGSMKEENNHLQEELER                         | 2144.3             | 3            | 3.5976 | 0.2617 |
| SLGSSDLKF                                  | 954.1              | 2            | 2.6033 | 0.1679 |
| SLGSVQAPSYGAR                              | 1293.4             | 2            | 3.552  | 0.3038 |
| SLGSVQAPSYGARPVSSAASVYAGAGGSGSR            | 2856.1             | 3            | 4.4644 | 0.4547 |
| SLGSVSPSSSGFSSPHSGSTISIPFPNVLPDFSK         | 3408.7             | 3            | 4.0512 | 0.2755 |
| SLGTADVHFER                                | 1232.3             | 2            | 3.049  | 0.3418 |
| SLGTDLMNEMR                                | 1267.5             | 2            | 3.086  | 0.3452 |
| SLGVGYAAVDNPIFYKPNTAMLLGDAK                | 2827.2             | 3            | 3.8311 | 0.3107 |
| SLGVGYAAVDNPIFYKPNTAMLLGDAKK               | 2955.4             | 3            | 4.9281 | 0.3261 |
| SLGVHLSFIR                                 | 1129.3             | 2            | 3.6423 | 0.2726 |
| SLGYAYVNFQQPADAER                          | 1930.1             | 2            | 5.7544 | 0.4582 |
| SLGYAYVNFQQPADAERALDTMNF DVIK              | 3178.5             | 3            | 4.8572 | 0.4378 |
| SLHDAIMIVR                                 | 1155.4             | 2            | 3.2094 | 0.2845 |
| SLHDALCVLAQTVK                             | 1498.8             | 2            | 3.9584 | 0.4464 |
| SLHDPDGLVATYISEVHEHDGHL YLGSFR             | 3266.5             | 3            | 5.9117 | 0.5114 |
| SLHLVIQNDQGHTSVLHSYPESVGR                  | 2775.0             | 3            | 4.7318 | 0.4126 |
| SLHQAIEGDTSGDFLK                           | 1718.8             | 2            | 5.0917 | 0.3769 |
| SLHQQSTQLSSSLTSVK                          | 1832.0             | 2            | 4.5945 | 0.4396 |
| SLHSAHSLASR                                | 1166.3             | 2            | 2.5669 | 0.2795 |
| SLHSATTIGNK                                | 1129.2             | 2            | 3.1124 | 0.3159 |
| SLHSELMCPICLDMLK                           | 1834.3             | 2            | 2.8044 | 0.1182 |
| SLHSIINPPIAK                               | 1290.5             | 2            | 2.6115 | 0.1333 |
| SLHTLFGDK                                  | 1018.1             | 2            | 2.7474 | 0.318  |
| SLHTLFGDKLCTVATLR                          | 1876.2             | 3            | 5.0551 | 0.4245 |

| Peptide Sequence                         | Peptide mass (m/z) | Charge State | Xcorr  | DelCn2 |
|------------------------------------------|--------------------|--------------|--------|--------|
| SLIDMYSEVLDVLSYDASYNTQDHLPR              | 3261.5             | 3            | 4.3198 | 0.2752 |
| SLIGVDKFLGQATVALDEVFGAGR                 | 2464.8             | 3            | 3.4387 | 0.1641 |
| SLIPSYIRDSAAA VVVYDITNVNSFQQTTK          | 3302.7             | 3            | 4.6881 | 0.3207 |
| SLIVGLK                                  | 729.9              | 1            | 1.8106 | 0.1142 |
| SLKADLQKLKDELASTK                        | 1889.2             | 2            | 4.3078 | 0.4522 |
| SLKAGNASKDEIDSAVK                        | 1733.9             | 2            | 4.1108 | 0.3649 |
| SLKDEDVLQK                               | 1175.3             | 2            | 3.0933 | 0.1735 |
| SLKDEDVLQKLPVGTATLYFR                    | 2495.9             | 3            | 4.5722 | 0.272  |
| SLKDFSSSKR                               | 1155.3             | 2            | 2.7099 | 0.1837 |
| SLKDMEE SIR                              | 1208.4             | 2            | 3.466  | 0.2886 |
| SLKELQEMDKDDESLIK                        | 2022.3             | 2            | 5.2742 | 0.3893 |
| SLKLNTAEDA KDVIKEIEDFDSLEALR             | 3064.4             | 3            | 4.7554 | 0.3724 |
| SLKLNTAEDA KDVIKEIEDFDSLEALRLEGNTVGVEAAR | 4261.7             | 3            | 3.458  | 0.1789 |
| SLKNLQLDYVDLYLIHFPVSVKPGEEVIPK           | 3456.0             | 3            | 5.8266 | 0.3435 |
| SLKSQVAEAK                               | 1061.2             | 2            | 2.7237 | 0.1643 |
| SLKSTQDEINQAR                            | 1490.6             | 2            | 4.2746 | 0.3816 |
| SLLASLHTR                                | 1085.2             | 2            | 3.2265 | 0.1776 |
| SLLATMKTELQK                             | 1363.6             | 2            | 3.3945 | 0.2528 |
| SLLDASEEA I KK                           | 1304.5             | 2            | 2.6404 | 0.2582 |
| SLLDEHHISYVIDEDVKSGR                     | 2313.5             | 3            | 5.425  | 0.3466 |
| SLLDIISDPDAGTPEDK                        | 1786.9             | 2            | 4.2109 | 0.3342 |
| SLEGGQEDHYNNLSAS                         | 1777.8             | 2            | 4.6905 | 0.4062 |
| SLEGGQEDHYNNLSASK                        | 1906.0             | 2            | 5.4706 | 0.4863 |
| SLEGGQEDHYNNLSASKV                       | 2005.1             | 2            | 4.5278 | 0.4697 |
| SLEGGQEDHYNNLSASKVL                      | 2118.3             | 2            | 4.9631 | 0.3584 |
| SLEILNSAADILINSSEADEDGIRDEK              | 3032.3             | 3            | 3.8744 | 0.1947 |
| SLEKELESVGIR                             | 1473.7             | 2            | 3.2856 | 0.2754 |
| SLEELGGNNAIIAFEDADLSLVVPSALFAAVGTAGQR    | 3702.2             | 3            | 4.2003 | 0.3168 |
| SLEEQYHLGLDQK                            | 1544.7             | 2            | 3.4194 | 0.1781 |
| SLEEQYHLGLDQKR                           | 1700.9             | 2            | 3.5766 | 0.294  |
| SLLGDSAPTLHLNK                           | 1466.7             | 2            | 3.9846 | 0.3078 |
| SLLGEVEQNLQAAK                           | 1500.7             | 2            | 4.2633 | 0.387  |
| SLLGKDVFLK                               | 1233.5             | 2            | 3.4598 | 0.2689 |
| SLLGKDVFLKDCVGPEVEK                      | 2190.6             | 2            | 5.6045 | 0.4728 |
| SLLGKDVFLKDCVGPEVEKACANPAAGSVILLENLR     | 3884.6             | 3            | 7.5242 | 0.34   |
| SLLGVKENNKK                              | 1230.4             | 2            | 2.5602 | 0.1575 |

| Peptide Sequence                     | Peptide mass (m/z) | Charge State | Xcorr  | DelCn2 |
|--------------------------------------|--------------------|--------------|--------|--------|
| SLLHGDFHAFSAGPGLFSYIR                | 2293.6             | 3            | 5.7451 | 0.4943 |
| SLLKTYEQVLENLESK                     | 1895.1             | 2            | 4.4781 | 0.3315 |
| SLLKTYEQVLENLESKR                    | 2051.3             | 2            | 4.6429 | 0.4309 |
| SLLLSVNAR                            | 973.2              | 2            | 2.7585 | 0.1081 |
| SLLQALNEVK                           | 1115.3             | 2            | 3.255  | 0.2059 |
| SLLQALNEVKGR                         | 1328.5             | 2            | 3.3094 | 0.2364 |
| SLLSAEEAAK                           | 1019.1             | 2            | 3.1408 | 0.2385 |
| SLLSGLLIKDPNKR                       | 1554.9             | 2            | 3.3125 | 0.206  |
| SLLSHEFQDETDTEETLYSSKH               | 2726.8             | 3            | 4.2632 | 0.2786 |
| SLLSIPNTDYIQLLSEIAK                  | 2119.4             | 2            | 2.6536 | 0.2323 |
| SLLSLPEKEDKKEK                       | 1644.9             | 2            | 3.4935 | 0.1626 |
| SLLSMLSDLQIYQDSFEQR                  | 2274.5             | 2            | 5.1479 | 0.365  |
| SLLSNLDEVKK                          | 1246.4             | 2            | 3.1148 | 0.2334 |
| SLLSNLDEVKKER                        | 1531.7             | 2            | 3.0588 | 0.2517 |
| SLLSQEKEELQMSLLK                     | 1877.2             | 2            | 3.6532 | 0.3107 |
| SLLSSASATVGHGLTAVK                   | 1699.9             | 2            | 4.6919 | 0.4631 |
| SLLSSASATVGHGLTAVKEK                 | 1957.2             | 3            | 3.268  | 0.319  |
| SLLSVFEEDAGTLTDYTNQLLQAMQR           | 2945.3             | 2            | 3.674  | 0.3789 |
| SLLTEADAGHTEFTDEVYQNESR              | 2613.7             | 2            | 2.8616 | 0.1377 |
| SLLTIQEVDEFLLR                       | 1676.9             | 2            | 4.9332 | 0.3823 |
| SLLVIPNTLAVNAAQDSTDLVAK              | 2354.7             | 2            | 5.5779 | 0.5225 |
| SLLVNPEGPTLMR                        | 1427.7             | 2            | 3.6242 | 0.2785 |
| SLLVTELGSSR                          | 1162.3             | 2            | 3.8519 | 0.3092 |
| SLMPYFLLTQAVR                        | 1539.9             | 2            | 3.8727 | 0.4165 |
| SLNADVPEQLITPLVSLGHISMLAPDQFASPMK    | 3522.1             | 3            | 4.2824 | 0.2547 |
| SLNDITAK                             | 862.0              | 1            | 1.8006 | 0.1228 |
| SLNDITAKER                           | 1147.3             | 2            | 3.2521 | 0.2258 |
| SLNESKIEIER                          | 1318.5             | 2            | 2.5683 | 0.1331 |
| SLNIKTDVVDIYK                        | 1506.7             | 2            | 3.739  | 0.2928 |
| SLNILTAFQK                           | 1135.3             | 2            | 4.0628 | 0.3091 |
| SLNVESNFITGVGILALIDALRDNETLAELKIDNQR | 3957.4             | 3            | 5.4821 | 0.4012 |
| SLPEETVDFMVQHTSFK                    | 1996.2             | 2            | 2.8648 | 0.2801 |
| SLPEIDGLSKETVLSSWMAK                 | 2192.5             | 2            | 3.6367 | 0.3573 |
| SLPELDRDKSDSDTEGLLSFR                | 2381.5             | 3            | 3.4407 | 0.1724 |
| SLPFGAQSTQR                          | 1192.3             | 2            | 3.0489 | 0.2995 |
| SLPHLPGTTPRPTSSLPPGSVK               | 2126.4             | 2            | 2.9689 | 0.1099 |

| Peptide Sequence               | Peptide mass (m/z) | Charge State | Xcorr  | DelCn2 |
|--------------------------------|--------------------|--------------|--------|--------|
| SLPIVFDEFVDMDFGTGAVK           | 2188.5             | 2            | 5.582  | 0.5984 |
| SLPIYSPEKVEEYR                 | 1710.9             | 2            | 3.4701 | 0.3085 |
| SLPIYSPEKVEEYRNR               | 1981.2             | 2            | 4.1304 | 0.1925 |
| SLPLLLSQAGVR                   | 1254.5             | 2            | 3.7126 | 0.3529 |
| SLPLQPGMVITIEPGIYIPEDDKDAPEKFR | 3370.9             | 3            | 3.5614 | 0.3526 |
| SLPNEEIVQKIEEVLSGVLDTELK       | 2712.0             | 3            | 3.7075 | 0.3513 |
| SLPSDLAFNGDLAK                 | 1448.6             | 2            | 3.3175 | 0.2823 |
| SLPVEEQPKQIIVTR                | 1738.0             | 2            | 3.5457 | 0.3298 |
| SLQAKDEDEKDEDEKEK              | 1908.0             | 3            | 3.9414 | 0.1923 |
| SLQALGEVIEAELR                 | 1528.7             | 2            | 4.8999 | 0.2861 |
| SLQDASRGDPAHAGLAELGHR          | 2159.3             | 3            | 4.514  | 0.4377 |
| SLQDIIAILGMDELSEEDKLTVSR       | 2677.0             | 2            | 5.4533 | 0.5553 |
| SLQEANAQKVTQEIVTER             | 2046.2             | 2            | 4.9135 | 0.2943 |
| SLQEEHVAVVAQLR                 | 1480.7             | 2            | 2.8627 | 0.3195 |
| SLQEEHVAVVAQLREEAER            | 2095.3             | 2            | 3.2589 | 0.2443 |
| SLQELFLAHILSPWGAEVK            | 2139.5             | 2            | 5.2119 | 0.3606 |
| SLQELFLAHILSPWGAEVKAEPVEVVAPR  | 3187.7             | 3            | 7.8529 | 0.5259 |
| SLQENEEEEIGNLELAWDMLDLAK       | 2791.0             | 3            | 4.6067 | 0.4023 |
| SLQENIAYGLTQKPTMEEITAAAVK      | 2708.1             | 3            | 4.7694 | 0.2088 |
| SLQEQADAAEER                   | 1347.4             | 2            | 4.7839 | 0.3269 |
| SLQEQADAAEERAGTLQR             | 1974.1             | 2            | 4.2093 | 0.3393 |
| SLQETIQSLKLTNQELLR             | 2115.4             | 2            | 3.7171 | 0.326  |
| SLQMYLER                       | 1040.2             | 2            | 2.5517 | 0.1832 |
| SLQPSVLMQLK                    | 1244.5             | 2            | 2.6331 | 0.1171 |
| SLQPVEDVSLSWHLPPGLSAK          | 2360.7             | 2            | 3.559  | 0.3658 |
| SLQQLAEERSQLLGSAAHEVQR         | 2380.6             | 3            | 5.2175 | 0.3826 |
| SLQQSWELLATHENHLNQDDTVPESSR    | 3136.3             | 3            | 3.3541 | 0.2399 |
| SLQQTSGPATAK                   | 1189.3             | 2            | 3.4286 | 0.2726 |
| SLQSQLQNKESVLEGAER             | 2146.3             | 3            | 3.5383 | 0.2666 |
| SLQSVAEER                      | 1019.1             | 2            | 2.8188 | 0.1885 |
| SLQTLKDRLESLEHQLR              | 2067.3             | 3            | 3.66   | 0.2518 |
| SLRDLTPEHLPLLR                 | 1660.9             | 3            | 3.5955 | 0.358  |
| SLREAQAALAEAQEDLESER           | 2217.3             | 2            | 3.1657 | 0.242  |
| SLREAQAALAEAQEDLESERVAR        | 2543.7             | 3            | 3.708  | 0.2094 |
| SLREHMGNVVEALIALTN             | 1968.3             | 2            | 2.4971 | 0.1476 |
| SLRGSDALSETSSVSHIEDLEKVER      | 2745.9             | 3            | 5.7107 | 0.4587 |



| Peptide Sequence                        | Peptide mass (m/z) | Charge State | Xcorr  | DelCn2 |
|-----------------------------------------|--------------------|--------------|--------|--------|
| SLRPDPNFDALISK                          | 1573.8             | 2            | 3.5689 | 0.2082 |
| SLRVDIAEGR                              | 1116.3             | 2            | 3.3826 | 0.1327 |
| SLRVPAHISLLHVEQEVAAGDDTPALQSVLESDSVR    | 3770.2             | 3            | 5.1299 | 0.389  |
| SLSALGNVISALAEGSTYVPYR                  | 2269.5             | 2            | 4.4863 | 0.3633 |
| SLSALGNVISALAEGSTYVPYRDSK               | 2599.9             | 2            | 4.1164 | 0.3432 |
| SLSALGNVISALAEGTK                       | 1631.9             | 2            | 4.8751 | 0.3452 |
| SLSDESEDDSK                             | 1170.1             | 2            | 2.8684 | 0.3497 |
| SLSDESEDDSKSK                           | 1385.4             | 2            | 2.9597 | 0.2153 |
| SLSDTVEKCLKDEVKETSQRPGATVPTDFATFPSSAFLR | 4369.9             | 3            | 4.3459 | 0.3102 |
| SLS EDTDGTEEDPQAELAIHGMAYILQLQGR        | 3630.9             | 3            | 6.5541 | 0.4665 |
| SLSEGHPTAQHEK                           | 1421.5             | 2            | 3.6454 | 0.3675 |
| SLSELESLKLPAESNEK                       | 1875.1             | 2            | 4.3161 | 0.3609 |
| SLSELESLKLPAESNEKIK                     | 2116.4             | 2            | 3.9901 | 0.3407 |
| SLSHIDPDVLYPSLNVTSFDSVVPEKLDDLVPK       | 3641.1             | 3            | 3.7518 | 0.2019 |
| SLSHLPLHSSK                             | 1206.4             | 2            | 3.1198 | 0.2975 |
| SLSHLPLHSSKEDAYDGVTSENMR                | 2674.9             | 3            | 4.2015 | 0.3536 |
| SLSIEIGHEVKTKQNK                        | 1683.9             | 2            | 3.0192 | 0.2553 |
| SLSLGGHVGFDLDPDQLVSK                    | 2057.3             | 3            | 4.131  | 0.3637 |
| SLSLADSGHLPDVHGFNSYGSRR                 | 2654.8             | 3            | 4.3502 | 0.362  |
| SLSNTKPTVNEHDLLK                        | 1797.0             | 2            | 4.0863 | 0.3064 |
| SLSNVIAHEISHSWTGNLVTNK                  | 2408.7             | 3            | 4.3619 | 0.4515 |
| SLSQIHEAAVR                             | 1211.4             | 2            | 3.6284 | 0.246  |
| SLSQSFENLLDEPAYGLIQAG                   | 2253.5             | 3            | 4.9063 | 0.2204 |
| SLSSAINASTGNLLESVNLKLFGEK               | 2643.9             | 2            | 4.3257 | 0.3415 |
| SLSSELKKPQAHLPVHTEK                     | 2130.4             | 3            | 3.3557 | 0.1612 |
| SLSSQASKLGEQMADLHLYNQK                  | 2449.7             | 3            | 4.19   | 0.3027 |
| SLSSSLDDTEVK                            | 1281.3             | 2            | 2.4427 | 0.1966 |
| SLSSSLDDTEVKK                           | 1409.5             | 2            | 4.0074 | 0.3353 |
| SLSSSPQAQPPRPAELSDEEVAELFQR             | 2970.2             | 3            | 3.8991 | 0.3276 |
| SLSTAPVVQPLSIQDLVR                      | 1924.2             | 2            | 2.7746 | 0.3069 |
| SLSVLSSSTIIANPDIPAYK                    | 2206.5             | 2            | 2.9998 | 0.2089 |
| SLTELVKKNHELR                           | 1715.9             | 2            | 3.0747 | 0.2764 |
| SLTELQELEAVYER                          | 1680.8             | 2            | 3.8598 | 0.1464 |
| SLTEYLQNVEQK                            | 1452.6             | 2            | 3.7781 | 0.2687 |
| SLTMSGHVGFEKSLPDQLVNR                   | 2188.5             | 2            | 4.5616 | 0.4726 |
| SLTNDWEDHLAVK                           | 1528.6             | 2            | 4.4144 | 0.3981 |

| Peptide Sequence                      | Peptide mass (m/z) | Charge State | Xcorr  | DelCn2 |
|---------------------------------------|--------------------|--------------|--------|--------|
| SLTNDWEDHLAVKHFSVEGQLEFR              | 2859.1             | 3            | 3.9455 | 0.1707 |
| SLTPAVPVESKPKPSGK                     | 1838.1             | 2            | 3.9418 | 0.4675 |
| SLTTLGLVISALADQSAGK                   | 1846.1             | 2            | 5.7648 | 0.4522 |
| SLTTLGLVISSLADQAAGK                   | 1846.1             | 2            | 4.7702 | 0.2612 |
| SLTTLGLVISSLADQAAGK GK                | 2031.3             | 2            | 2.6479 | 0.1121 |
| SLVDLTAVDVPTR                         | 1386.6             | 2            | 3.3067 | 0.2689 |
| SLVDYENANK                            | 1153.2             | 2            | 2.8934 | 0.2648 |
| SLVESVSSSPNK                          | 1234.3             | 2            | 2.4702 | 0.1179 |
| SLVESVSSSPNKESNEEEQVWHFLGK            | 2948.1             | 3            | 5.8568 | 0.4026 |
| SLVEYSQDVL AHPVSEEHLPDVSLIGEFSDPAELGK | 3909.3             | 3            | 4.8876 | 0.3228 |
| SLVIELDKELYGPDNHLVEWHR                | 2664.0             | 3            | 4.4822 | 0.3251 |
| SLVLDTKDLTIEK                         | 1475.7             | 2            | 3.485  | 0.2691 |
| SLVPAAELLESR                          | 1285.5             | 2            | 2.9483 | 0.3219 |
| SLVSDKTSISEK                          | 1294.4             | 2            | 2.8559 | 0.3284 |
| SLVSKGTLVQTK                          | 1261.5             | 2            | 3.3133 | 0.2563 |
| SLVSVTKEGLELPEDEEEKKK                 | 2388.7             | 3            | 4.7402 | 0.3052 |
| SLVSVTKEGLELPEDEEEKKKMEESK            | 2993.3             | 3            | 6.2562 | 0.4444 |
| SLVSVTKEGLELPEDEEEKKKMEESKAK          | 3192.6             | 3            | 5.4438 | 0.3941 |
| SLYASSPGGVYATR                        | 1429.6             | 2            | 4.6157 | 0.3607 |
| SLYDEVAAQGEVVR                        | 1536.7             | 2            | 4.5683 | 0.3891 |
| SLYDEVAAQGEVVRK                       | 1664.8             | 2            | 4.3607 | 0.3838 |
| SLYGKDLIADLK                          | 1336.6             | 2            | 2.9553 | 0.2206 |
| SLYGKDLIADLKYELTGK                    | 2028.3             | 2            | 6.2063 | 0.494  |
| SLYGKDLIADLKYELTGKFER                 | 2460.8             | 3            | 6.0888 | 0.4674 |
| SLYHDISGDTSGDYR                       | 1686.7             | 2            | 3.8752 | 0.3644 |
| SLYHDISGDTSGDYRK                      | 1814.9             | 2            | 4.6    | 0.4179 |
| SLYNVNGLK                             | 1008.2             | 2            | 2.466  | 0.1799 |
| SLYQSAGVAPESFEYIEAHGTGK               | 2543.7             | 2            | 4.4774 | 0.4567 |
| SLYQSAGVAPESFEYIEAHGTGKVGDPQELNGITR   | 3824.1             | 3            | 4.5525 | 0.2773 |
| SLYSEKEVFIR                           | 1371.6             | 2            | 3.1389 | 0.2748 |
| SLYSFIKGTSGDYR                        | 1709.8             | 2            | 2.9272 | 0.3307 |
| SLYVAEYHSEPVEDEKP                     | 1993.1             | 2            | 5.1315 | 0.3808 |
| SLYYYYIQQDTK                          | 1422.6             | 2            | 4.2889 | 0.2953 |
| SLYYYYIQQDTKGDYQK                     | 2014.2             | 2            | 4.8797 | 0.4277 |
| SMAASGNLGH TPFVDEL                    | 1746.9             | 2            | 3.909  | 0.3138 |
| SMAEDTINAAVK                          | 1250.4             | 2            | 4.1915 | 0.2921 |

| Peptide Sequence                      | Peptide mass (m/z) | Charge State | Xcorr  | DelCn2 |
|---------------------------------------|--------------------|--------------|--------|--------|
| SMAEDTINAAVKTHNLK                     | 1844.1             | 2            | 3.9644 | 0.3555 |
| SMASGGGVPTDEEQATGLER                  | 1993.1             | 3            | 4.5577 | 0.386  |
| SMDFEEAER                             | 1114.2             | 2            | 3.1    | 0.3287 |
| SMDFEEAERSEPTQALELTEDDIKEDGIVPLR      | 3664.9             | 3            | 5.6206 | 0.3462 |
| SMDNMTVRVPETVADAR                     | 1893.1             | 3            | 4.1497 | 0.2075 |
| SMEAEMIQLQEELAAAER                    | 2050.3             | 3            | 5.5545 | 0.4232 |
| SMEMLVEHQAHDLT                        | 1755.0             | 2            | 3.8304 | 0.3547 |
| SMENEDKEETVAK                         | 1510.6             | 2            | 4.0468 | 0.3427 |
| SMFAGDKK                              | 884.0              | 2            | 2.4757 | 0.1105 |
| SMFAGVPTMR                            | 1097.3             | 2            | 2.6817 | 0.212  |
| SMGFIGHYLDQK                          | 1396.6             | 2            | 3.3504 | 0.284  |
| SMGFIGHYLDQKR                         | 1552.8             | 2            | 3.2876 | 0.3207 |
| SMGSQEDDSGNKPSSYS                     | 1776.8             | 2            | 4.1586 | 0.4145 |
| SMIASTAITVHYLDLSLNPSGEVTR             | 2677.0             | 2            | 3.6402 | 0.2827 |
| SMIGEPTNFVHTAHVGSGLDFSGMNSVSSIQNQMQSK | 3925.3             | 3            | 3.664  | 0.1942 |
| SMKFVDGLMIHSGDPVNYVDTAVR              | 2816.2             | 3            | 4.1822 | 0.3873 |
| SMKGLGTDNTLIR                         | 1521.7             | 2            | 4.0299 | 0.3853 |
| SMKLPQEQSQLPNPSEASTTFPESHLR           | 3041.3             | 3            | 3.973  | 0.2277 |
| SMLEVNYPMENGIVR                       | 1753.0             | 2            | 5.0458 | 0.298  |
| SMLQATAEANNLAAAASAK                   | 1834.0             | 2            | 5.9412 | 0.4554 |
| SMLRPLELSLPSQTSYSENEILKK              | 2765.2             | 3            | 3.7187 | 0.1068 |
| SMMGGGLAEIPGLSINFAK                   | 1894.2             | 2            | 4.3802 | 0.3843 |
| SMMQDREDQSILCTGESGAGKTENTKK           | 2946.2             | 3            | 5.493  | 0.2153 |
| SMMQSLSQNPDLAAQMMLNPLFAGNPQLQEOMR     | 3836.4             | 3            | 5.7128 | 0.4598 |
| SMNINLWSEITELLYK                      | 1955.3             | 2            | 2.9079 | 0.2015 |
| SMPEQTGEK                             | 1007.1             | 1            | 1.7235 | 0.1308 |
| SMPELDSPTSGRPGVTSLTAAAFKPVGSTGVIK     | 3448.9             | 3            | 5.0143 | 0.4394 |
| SMPIRKDDEVQVVR                        | 1672.9             | 2            | 3.8212 | 0.2799 |
| SMPVLGSVSSVTK                         | 1292.5             | 2            | 2.7758 | 0.2696 |
| SMQNHAAVFR                            | 1161.3             | 2            | 3.5355 | 0.3889 |
| SMQVVPLDKQITIIDSPSFIVSPLNSSSALALR     | 3529.1             | 3            | 6.5563 | 0.4835 |
| SMSDVSAEDVQNLR                        | 1551.7             | 2            | 3.2339 | 0.1977 |
| SMSGHPEAAQMVR                         | 1401.6             | 2            | 3.71   | 0.3811 |
| SMTEAEQQQLIDDHFLFDKPVSPLLLASGMAR      | 3590.1             | 3            | 6.3316 | 0.4766 |
| SMTLLNTMDR                            | 1182.4             | 2            | 2.9408 | 0.2039 |
| SMTLLNTMDRILYESQR                     | 2072.4             | 2            | 3.3244 | 0.2283 |

| Peptide Sequence                   | Peptide mass (m/z) | Charge State | Xcorr  | DelCn2 |
|------------------------------------|--------------------|--------------|--------|--------|
| SMVEDITGLR                         | 1121.3             | 2            | 2.7285 | 0.2486 |
| SMVEEGTGLR                         | 1079.2             | 2            | 3.1356 | 0.181  |
| SMVNTKPEKTEEDSEEVREQK              | 2494.7             | 3            | 4.6591 | 0.2183 |
| SMVPVQVQLDVPVVK                    | 1639.0             | 2            | 4.3729 | 0.4163 |
| SMYEEEINETR                        | 1401.5             | 2            | 3.4402 | 0.2894 |
| SNAFAEKNGLQKYEYVLHPR               | 2365.6             | 3            | 3.4288 | 0.1492 |
| SNAHYNLQNAFNLAEQHLGLTK             | 2484.7             | 3            | 7.1345 | 0.5241 |
| SNAQGIDLNR                         | 1088.2             | 2            | 3.904  | 0.2943 |
| SNAQRQDIAFAYQR                     | 1668.8             | 2            | 4.1203 | 0.389  |
| SNASLTNNQNLIQSLKEDLNKVR            | 2600.9             | 3            | 3.6869 | 0.1918 |
| SNCKPSTFAYPAPLEVPKEK               | 2207.5             | 3            | 3.3714 | 0.2205 |
| SNDPQMVAENFVPPLLDAVLIDYQR          | 2846.2             | 3            | 3.671  | 0.2556 |
| SNDPVATAFAEMLK                     | 1494.7             | 2            | 2.9321 | 0.2962 |
| SNDPVAYALAEMLKENK                  | 1894.1             | 2            | 2.6311 | 0.2892 |
| SNEAASKELASK                       | 1235.3             | 2            | 2.7394 | 0.2358 |
| SNEDQSMGNWQIK                      | 1537.6             | 2            | 3.194  | 0.1822 |
| SNEEGSEEKGPEVR                     | 1547.6             | 2            | 3.8585 | 0.3517 |
| SNEGKLEGLTDEFEELEFLSTINVGLTSIANLPK | 3710.1             | 3            | 4.5817 | 0.252  |
| SNEILTAIIQGMR                      | 1446.7             | 2            | 3.4876 | 0.3174 |
| SNELGDVGVHCVLQGLQTPSCK             | 2285.6             | 2            | 2.7546 | 0.2077 |
| SNETNGYLDSAQAGPAAGPGAPGTAAGR       | 2559.6             | 3            | 5.0459 | 0.3831 |
| SNFAEALAAHK                        | 1159.3             | 2            | 3.687  | 0.4467 |
| SNFEPFFMMIATPAPHSPWTAAPQYQK        | 3096.5             | 3            | 3.9046 | 0.2511 |
| SNFLNCYVSGFHPSDIEVDLLK             | 2498.8             | 2            | 4.629  | 0.4704 |
| SNFSLAILNVGAPAAGMNAAVR             | 2145.5             | 3            | 5.7866 | 0.4295 |
| SNFNSADDIKSK                       | 1413.5             | 2            | 3.3072 | 0.2854 |
| SNGHIYDNR                          | 1076.1             | 2            | 2.7181 | 0.1332 |
| SNGKETVVGR                         | 1047.1             | 2            | 2.64   | 0.1606 |
| SNGWILPTVYQGMYNATTR                | 2173.4             | 3            | 5.3963 | 0.4046 |
| SNGYEEAYSVFKK                      | 1522.6             | 2            | 3.2768 | 0.2388 |
| SNHDKNVIPDEVLQTLLDHYSHK            | 2703.9             | 3            | 5.6021 | 0.4262 |
| SNIDALLSRLEQIAAEQK                 | 2000.2             | 3            | 5.5637 | 0.3638 |
| SNIDALLSRLEQIAAEQKANPDGK           | 2582.9             | 3            | 4.6325 | 0.1815 |
| SNILLLGPTGSGK                      | 1257.5             | 2            | 3.2141 | 0.1136 |
| SNKDGGNQEVEIAR                     | 1517.6             | 2            | 3.5465 | 0.3062 |
| SNKEIMEHIR                         | 1257.4             | 2            | 2.8715 | 0.191  |

| Peptide Sequence                       | Peptide mass (m/z) | Charge State | Xcorr  | DelCn2 |
|----------------------------------------|--------------------|--------------|--------|--------|
| SNLAYDIVQLPTGLTGIK                     | 1904.2             | 2            | 4.8833 | 0.4387 |
| SNLELFKEELK                            | 1350.5             | 2            | 2.518  | 0.1252 |
| SNLFEDATSALVTGQSYENMVTEIMSMGYER        | 3475.8             | 3            | 3.3319 | 0.1577 |
| SNLGSVVLQLK                            | 1158.4             | 2            | 3.3131 | 0.3558 |
| SNLISGSVMYIEEK                         | 1570.8             | 2            | 3.3618 | 0.132  |
| SNLLTQDNGILTFSNLSPGQYYFKPMMK           | 3209.7             | 3            | 5.3424 | 0.3481 |
| SNLMDAISFVLGEK                         | 1524.8             | 2            | 2.8542 | 0.121  |
| SNLVDNTNQVEVLQR                        | 1729.9             | 2            | 4.0912 | 0.3024 |
| SNLVDNTNQVEVLQRDPNSPLYSVK              | 2831.1             | 3            | 4.3755 | 0.354  |
| SNLVGMGVIPLEYLPGENADALGLTGQER          | 3015.4             | 3            | 3.8811 | 0.3962 |
| SNMDNMFESYINNLR                        | 1849.0             | 2            | 5.2651 | 0.4813 |
| SNMGHPEPASGLAALAK                      | 1651.9             | 2            | 3.2449 | 0.1256 |
| SNNHENVSLAK                            | 1213.3             | 2            | 3.426  | 0.2374 |
| SNNTSKPSHSVDAHTAEVNCLSFNPYSEFILATGSADK | 4041.3             | 3            | 5.8037 | 0.3963 |
| SNNVEMDWVLK                            | 1335.5             | 2            | 3.5815 | 0.2488 |
| SNNVEMDWVLKHTGPNSPDTANDGFVR            | 3002.2             | 3            | 3.8551 | 0.1901 |
| SNPEDQILYQTER                          | 1593.7             | 2            | 4.3734 | 0.4356 |
| SNPEIQDFMR                             | 1237.4             | 2            | 2.9208 | 0.2908 |
| SNPGHYLGHLIGHEGPGSLLSELK               | 2513.8             | 3            | 4.9628 | 0.4742 |
| SNPSAVAGNETPGASTK                      | 1588.7             | 2            | 4.2403 | 0.4427 |
| SNPSENEEKEAQSQLIK                      | 1932.0             | 2            | 5.2028 | 0.3331 |
| SNPSENEEKEAQSQLIKSDEMQR                | 2678.8             | 3            | 4.2743 | 0.3967 |
| SNPSVLQGLLR                            | 1184.4             | 2            | 2.9168 | 0.3306 |
| SNQLFNGHGGHIMPPTQSQFGEMGGK             | 2758.0             | 3            | 3.5817 | 0.1664 |
| SNQNGKDSKPSSTPR                        | 1603.7             | 2            | 4.8335 | 0.3152 |
| SNQQLENDLNLMEDIK                       | 1776.0             | 2            | 5.2431 | 0.4388 |
| SNQQLVDIIEK                            | 1287.4             | 2            | 3.2795 | 0.1911 |
| SNRDELELELAENRK                        | 1817.0             | 2            | 2.9784 | 0.1451 |
| SNRIEEQNDKISELIER                      | 2074.2             | 3            | 4.616  | 0.2223 |
| SNSDKLNSK                              | 1122.2             | 2            | 2.8076 | 0.2126 |
| SNSFNSTFEHHLPPSPLEHGTPFQR              | 2865.1             | 3            | 3.7521 | 0.2574 |
| SNSVEMDWVLK                            | 1308.5             | 2            | 3.2134 | 0.1338 |
| SNSVEMDWVLKHTGPNSPDTANDGFVR            | 2975.2             | 3            | 6.2485 | 0.3403 |
| SNTAGSQSQVETEA                         | 1409.4             | 2            | 4.2204 | 0.3967 |
| SNTENLSQHFR                            | 1333.4             | 2            | 3.4567 | 0.2264 |
| SNTKLTEELAVANNR                        | 1660.8             | 3            | 3.5049 | 0.1171 |

| Peptide Sequence                       | Peptide mass (m/z) | Charge State | Xcorr  | DelCn2 |
|----------------------------------------|--------------------|--------------|--------|--------|
| SNTLPISLQSIR                           | 1329.5             | 2            | 3.4438 | 0.2948 |
| SNTPILVDGKDVMPEVNK                     | 1957.2             | 2            | 4.8164 | 0.4964 |
| SNTPILVDGKDVMPEVNKVLDK                 | 2412.8             | 2            | 4.6868 | 0.4485 |
| SNTPILVDGKDVMPEVNKVLDKMK               | 2672.2             | 3            | 4.3066 | 0.1185 |
| SNTSPEELGPLANQLTSDYGR                  | 2250.4             | 3            | 4.8289 | 0.4886 |
| SNTTSKPSHLVDAHTAEVNCLSFNPYSEFILATGSADK | 4054.4             | 3            | 5.832  | 0.3842 |
| SNVKPNSGELDPLYVVEVLLR                  | 2342.7             | 3            | 5.1778 | 0.1866 |
| SNVSDAVAQSTR                           | 1235.3             | 2            | 4.7275 | 0.4459 |
| SNVTAVHK                               | 856.0              | 2            | 2.6906 | 0.2143 |
| SNYFEVPLPYFEYFK                        | 1944.2             | 2            | 4.1799 | 0.3367 |
| SNYLLNTTIAGVEEADVLLVGTNPR              | 2760.1             | 3            | 3.279  | 0.2096 |
| SNYNFEKPFLWLAR                         | 1786.0             | 3            | 4.6376 | 0.3807 |
| SNYNLPMHK                              | 1104.3             | 2            | 2.9214 | 0.1773 |
| SPADPTDLGGQTSR                         | 1499.6             | 2            | 4.257  | 0.457  |
| SPAFVQLAPLSSK                          | 1345.6             | 2            | 2.6671 | 0.1299 |
| SPAGLQVLNDYLADK                        | 1604.8             | 2            | 5.421  | 0.4217 |
| SPAGSIVHELNPWFQPKRPFK                  | 2461.8             | 3            | 4.3318 | 0.3321 |
| SPAHLSLIR                              | 994.2              | 2            | 2.8865 | 0.3081 |
| SPAISWVNNLEVDSR                        | 1687.8             | 2            | 3.2677 | 0.23   |
| SPAKPVQTITPHGK                         | 1461.7             | 2            | 3.4708 | 0.3602 |
| SPAPLLHVAALGQK                         | 1499.8             | 2            | 4.0804 | 0.3815 |
| SPAPSSDFADAITELEDAFSR                  | 2227.3             | 2            | 4.3892 | 0.4746 |
| SPAQILIR                               | 898.1              | 2            | 2.9434 | 0.2176 |
| SPAQILLR                               | 898.1              | 2            | 3.0709 | 0.2276 |
| SPASDTYIVFGEAK                         | 1485.6             | 2            | 4.4815 | 0.4382 |
| SPASDTYIVFGEAKIEDLSQQAQLAAAEKFK        | 3357.7             | 3            | 3.9401 | 0.2969 |
| SPAVATSTAAPPPSSPLPSK                   | 1961.2             | 2            | 4.3475 | 0.4442 |
| SPCIVLADADLDNAVEFAHHGVFYHQGCCIAASR     | 3760.2             | 3            | 5.2139 | 0.3991 |
| SPDEAYAIK                              | 1065.2             | 2            | 3.1219 | 0.2971 |
| SPDFTNENPLETR                          | 1520.6             | 2            | 4.3514 | 0.4434 |
| SPDLLMYQGPPDTAEIHK                     | 1989.3             | 2            | 2.8551 | 0.2289 |
| SPDPGIVPQEAPVGNLSLSEENFDGK             | 2914.1             | 3            | 4.3928 | 0.4613 |
| SPDPGIVPQEAPVGNLSLSEENFDGKFANLTPSR     | 3801.1             | 3            | 4.4073 | 0.2487 |
| SPEDSSPDAAR                            | 1132.1             | 2            | 2.9803 | 0.2155 |
| SPEEGAETPVYLALLPPDAEGPHGQFVSEK         | 3166.4             | 3            | 5.3491 | 0.3908 |
| SPELAAQPSTYLAVAEELADVSGK               | 2447.7             | 3            | 3.955  | 0.2185 |

| Peptide Sequence                      | Peptide mass (m/z) | Charge State | Xcorr  | DelCn2 |
|---------------------------------------|--------------------|--------------|--------|--------|
| SPENTEGKDGSK                          | 1249.3             | 2            | 2.7598 | 0.2964 |
| SPEQQLSATQK                           | 1217.3             | 2            | 3.1998 | 0.1834 |
| SPEYLSLFIDDKLKK                       | 1797.1             | 3            | 4.4284 | 0.3441 |
| SPFEQHIK                              | 986.1              | 2            | 2.5254 | 0.1473 |
| SPFEVQVGPEAGMQK                       | 1604.8             | 2            | 5.1309 | 0.341  |
| SPFSVAVSPSLDLSK                       | 1534.7             | 2            | 4.5716 | 0.3366 |
| SPFTVGVAAPLDLSK                       | 1502.7             | 2            | 4.5302 | 0.3364 |
| SPFVVQVGEACNPACR                      | 1792.0             | 2            | 3.5407 | 0.163  |
| SPGAAGLTSR                            | 917.0              | 2            | 2.5418 | 0.1621 |
| SPGADLLQVLTK                          | 1242.4             | 2            | 4.4582 | 0.4234 |
| SPGDTAKDALFASQEKEFFQELFDSELASQATAEFEK | 3985.3             | 3            | 5.3766 | 0.4606 |
| SPGETSKPRPFAGGGYR                     | 1764.9             | 2            | 3.1876 | 0.2559 |
| SPGGHSDGASPR                          | 1125.1             | 2            | 2.5216 | 0.2285 |
| SPGIISQASAPR                          | 1184.3             | 2            | 3.0913 | 0.1743 |
| SPGLGGEGGSHGVIQDLSILHQHVQQQPAQHHR     | 3563.8             | 3            | 4.2799 | 0.3032 |
| SPGPPALKHPATK                         | 1301.5             | 2            | 2.7861 | 0.2677 |
| SPGSQGVR                              | 787.8              | 1            | 1.8861 | 0.1065 |
| SPGSVSTHHSSPR                         | 1336.4             | 2            | 3.4649 | 0.3445 |
| SPGVVISDDEPGYDLDFCIPNHYAEDLER         | 3380.6             | 3            | 4.8964 | 0.2612 |
| SPHPSSALHFPTTSILPQTASTYFPHTAIR        | 3264.6             | 3            | 4.3217 | 0.2527 |
| SPIAEAVFR                             | 990.1              | 2            | 2.9286 | 0.2848 |
| SPIAEAVFRK                            | 1118.3             | 2            | 3.054  | 0.2484 |
| SPIIFIGTGEHIDDFEPFK                   | 2163.4             | 2            | 4.7642 | 0.4106 |
| SPIIFIGTGEHIDDFEPFKTQPFISK            | 2965.3             | 3            | 4.9586 | 0.3457 |
| SPILLGSLAHQIYR                        | 1568.8             | 2            | 4.5379 | 0.3907 |
| SPILVATAVAAR                          | 1169.4             | 2            | 2.7354 | 0.1934 |
| SPINVESLLDGLNSLVLDLDFPALRK            | 2840.3             | 3            | 4.2717 | 0.4494 |
| SPISVPGGSALISNLGK                     | 1597.8             | 2            | 2.7611 | 0.3615 |
| SPITGNDLSPVVSFNLMFK                   | 2065.4             | 2            | 5.361  | 0.4552 |
| SPKDLVVICKVFNPQLPFKPHGSR              | 2708.2             | 3            | 3.3056 | 0.114  |
| SPKDNVDDPTGNFR                        | 1562.6             | 2            | 4.3711 | 0.4887 |
| SPKDPSQLNSK                           | 1201.3             | 2            | 2.7708 | 0.1473 |
| SPLLELQMQEGEHTIR                      | 1769.0             | 2            | 3.6775 | 0.3186 |
| SPLGEVAIRDIVQFVPFR                    | 2044.4             | 3            | 5.3451 | 0.4127 |
| SPLLAGGSPQPVVPAHKDK                   | 1996.3             | 3            | 4.0808 | 0.2931 |
| SPLLQLPHIEEDNLR                       | 1775.0             | 2            | 3.5482 | 0.3235 |

| Peptide Sequence             | Peptide mass (m/z) | Charge State | Xcorr  | DelCn2 |
|------------------------------|--------------------|--------------|--------|--------|
| SPLMSEFQSQISSNPELAAIFESIQK   | 2883.2             | 3            | 3.8311 | 0.2393 |
| SPLQSQPHSR                   | 1137.2             | 2            | 3.291  | 0.1671 |
| SPLVLEVDPNIQAVR              | 1650.9             | 2            | 5.04   | 0.4689 |
| SPNELVDDLFKGAKEHGAVAVR       | 2482.7             | 3            | 4.9369 | 0.3702 |
| SPPEKTQADLLAFLHSQVDKAEVNAGVK | 2994.3             | 3            | 3.3496 | 0.1475 |
| SPPFFENLTLDLQPPK             | 1844.1             | 2            | 2.987  | 0.2349 |
| SPPGQVTEAVK                  | 1113.2             | 2            | 3.1546 | 0.3198 |
| SPIPLAKVDATAETDLAK           | 1938.2             | 2            | 2.5927 | 0.2186 |
| SPPSYSVLYPSSDPK              | 1624.8             | 2            | 4.4393 | 0.3248 |
| SPPTVLVICGPGNNGGDGLVCAR      | 2197.5             | 2            | 3.3917 | 0.1722 |
| SPPYTAFLGNLPYDVTEESIKEFFR    | 2922.2             | 3            | 4.7824 | 0.3871 |
| SPQDLASTSR                   | 1062.1             | 2            | 2.659  | 0.2835 |
| SPQLILVNMA SFPECTAAAIK       | 2205.6             | 2            | 2.5775 | 0.1666 |
| SPQMVSAIVR                   | 1088.3             | 2            | 3.1769 | 0.2323 |
| SPQSLSAIIAAMQK               | 1403.6             | 2            | 4.8636 | 0.3079 |
| SPSAQLMEQVAQLK               | 1530.8             | 2            | 4.7979 | 0.3421 |
| SPSDSSTASTPVAEQIER           | 1862.9             | 2            | 4.9101 | 0.4775 |
| SPSEEPPEEEIPKEDGILVLSR       | 2451.7             | 3            | 4.1704 | 0.2538 |
| SPSELF AQHIVTIVHHVK          | 2043.4             | 3            | 6.1682 | 0.458  |
| SPSGGAAGPLLTPSQSLDGSR        | 1956.1             | 2            | 5.2057 | 0.506  |
| SPSKENIASVLENYHTESK          | 2134.3             | 2            | 4.8448 | 0.4061 |
| SPSKPLPEVTDEYKNDVK           | 2047.3             | 2            | 3.8277 | 0.409  |
| SPSLQSETVHYKR                | 1532.7             | 2            | 2.5331 | 0.1784 |
| SPSQKKPVSK                   | 1086.3             | 2            | 2.8898 | 0.2065 |
| SPSSSSVGGR                   | 920.9              | 2            | 2.5841 | 0.3247 |
| SPSTLLPK                     | 843.0              | 2            | 2.4377 | 0.1811 |
| SPSWQRPNQGV PSTGR            | 1754.9             | 3            | 3.2777 | 0.1692 |
| SPTADAKPAPK                  | 1083.2             | 2            | 2.8607 | 0.1837 |
| SPTDWALFTYEGNSN DIR          | 2087.2             | 2            | 2.571  | 0.2009 |
| SPTKAPHLQLIEGK               | 1519.8             | 2            | 3.8183 | 0.3201 |
| SPVAKDVDLEFLAK               | 1532.8             | 2            | 4.2767 | 0.3429 |
| SPVAVQSTK                    | 917.0              | 2            | 2.8086 | 0.2982 |
| SPVDVLQIFR                   | 1174.4             | 2            | 3.416  | 0.3019 |
| SPVESTTEPPAVR                | 1370.5             | 2            | 3.5724 | 0.3459 |
| SPVEVAQDVLAAVGK              | 1483.7             | 2            | 4.2298 | 0.3798 |
| SPVEVAQDVLAAVGKK             | 1611.9             | 2            | 4.736  | 0.4488 |



| Peptide Sequence               | Peptide mass (m/z) | Charge State | Xcorr  | DelCn2 |
|--------------------------------|--------------------|--------------|--------|--------|
| SPVKVTLSEGGPHHVALFK            | 1947.3             | 2            | 5.3502 | 0.4775 |
| SPVLDTKPK                      | 985.2              | 2            | 2.4248 | 0.1273 |
| SPVYLDLAYLPSGSSAHLVDEEFFQR     | 2942.2             | 3            | 3.5689 | 0.1821 |
| SPWSNKYDPPLEDGAMPSAR           | 2219.4             | 3            | 4.3793 | 0.3704 |
| SPYGGGRPGR                     | 1004.1             | 2            | 2.6441 | 0.1094 |
| SPYLYPLYGLGELPQGFAR            | 2142.4             | 2            | 5.9956 | 0.4983 |
| SPYQEFTDHLVK                   | 1464.6             | 2            | 3.8685 | 0.3496 |
| SPYQLVLQHSR                    | 1328.5             | 2            | 2.8012 | 0.1058 |
| SPYSYSTTAVVTNPK                | 1615.8             | 2            | 4.5294 | 0.4776 |
| SPYTVTQACNPSACR                | 1755.0             | 2            | 3.0496 | 0.1914 |
| SQAADQITK                      | 962.0              | 2            | 2.5783 | 0.1358 |
| SQAEDVRVEGSFPVTMLPGDVGPELMHAVK | 3254.7             | 3            | 5.4525 | 0.4164 |
| SQAEPLSGNKEPLADTSSNQK          | 2330.5             | 3            | 4.65   | 0.2731 |
| SQAIHQLK                       | 925.1              | 2            | 2.8218 | 0.1527 |
| SQAPGQPGASQWGSR                | 1514.6             | 2            | 3.2002 | 0.2349 |
| SQAPLESSLDSLGDVFLDSGRK         | 2322.5             | 2            | 2.7385 | 0.259  |
| SQAVEKPPSEKPR                  | 1453.6             | 2            | 3.4666 | 0.3184 |
| SQAYADYIGFILTLNEGK             | 2103.4             | 2            | 3.6521 | 0.3739 |
| SQDAEVDGTTSVTLAAEFLK           | 2253.4             | 2            | 6.4743 | 0.569  |
| SQDDEIGDGTGGVVVLAGALLEEAEQLLDR | 3115.3             | 3            | 6.5187 | 0.4662 |
| SQDFGNLFSFPSYSQK               | 1853.0             | 2            | 3.9309 | 0.2899 |
| SQDPQEDKKEEK                   | 1461.5             | 2            | 2.7228 | 0.2269 |
| SQDPTPPSAPQEATEGSK             | 1827.9             | 2            | 2.7658 | 0.2437 |
| SQEAQSLQQQR                    | 1303.4             | 2            | 2.9026 | 0.146  |
| SQEDLNEPIKR                    | 1329.4             | 2            | 3.1721 | 0.1699 |
| SQEELPKDTFEHDPSEIDFNK          | 2609.7             | 3            | 4.7315 | 0.3753 |
| SQEESEEGEEDATSEVD              | 1870.7             | 2            | 5.5282 | 0.4849 |
| SQEETPGHR                      | 1041.1             | 2            | 2.9121 | 0.3037 |
| SQEGRPVQVIGALIGK               | 1652.9             | 2            | 2.936  | 0.177  |
| SQEIDDHQHEMSVLQNAHQK           | 2503.7             | 3            | 5.7854 | 0.3242 |
| SQELSGPASNGGISQTNTYDAQYER      | 2674.7             | 3            | 6.3628 | 0.4293 |
| SQEMVHLVVK                     | 1185.4             | 2            | 3.9865 | 0.2739 |
| SQEMVHLVVKESSETPDQFMTADETR     | 3011.2             | 3            | 6.7566 | 0.4835 |
| SQEPLPDDDEEFELPEFVEPFLK        | 2750.9             | 3            | 4.8184 | 0.3555 |
| SQEQEVLER                      | 1118.2             | 2            | 2.8541 | 0.1003 |
| SQEQLAAELAEYTAK                | 1652.8             | 2            | 5.3976 | 0.4477 |

| Peptide Sequence                      | Peptide mass (m/z) | Charge State | Xcorr  | DelCn2 |
|---------------------------------------|--------------------|--------------|--------|--------|
| SQESGEEAGSQENHPQESK                   | 2059.0             | 2            | 5.1996 | 0.5256 |
| SQESGYDR                              | 1105.1             | 2            | 2.571  | 0.1508 |
| SQESNVSQKENLELKEHIRQNEEELSR           | 3368.6             | 3            | 4.4275 | 0.3549 |
| SQETECTYFSTPLLLGK                     | 1918.2             | 2            | 5.6612 | 0.4819 |
| SQEVEDKTKEYELLSDELNQK                 | 2526.7             | 3            | 5.2052 | 0.261  |
| SQEVEDKTR                             | 1092.1             | 2            | 2.7853 | 0.2044 |
| SQFEAQKIWYEHR                         | 1722.9             | 2            | 4.5851 | 0.3558 |
| SQFFEQSSDSVVPDLPVPTISAPSR             | 2749.0             | 3            | 4.5334 | 0.3288 |
| SQFSDKPVQDR                           | 1307.4             | 2            | 3.2915 | 0.3425 |
| SQFTITPGSEQIR                         | 1464.6             | 2            | 4.1759 | 0.3245 |
| SQGAALDKYAK                           | 1152.3             | 2            | 3.6345 | 0.3424 |
| SQGADKDLAAK                           | 1104.2             | 2            | 2.7992 | 0.1959 |
| SQGEKEMYTLGITNFPPIGEPGFPLNAIYAK       | 3384.8             | 3            | 4.3294 | 0.1641 |
| SQGGPTYNVAVGR                         | 1435.5             | 2            | 4.5122 | 0.3912 |
| SQGGVQPIPSQGGK                        | 1340.5             | 2            | 3.6188 | 0.2027 |
| SQGLSQLYHNQSQGLLSQLQGQSK              | 2630.9             | 3            | 3.3287 | 0.2367 |
| SQGPLEVAEAAVSQSSGLAAK                 | 2001.2             | 2            | 5.9605 | 0.5794 |
| SQGQDVTSSVYFMK                        | 1577.7             | 2            | 2.8456 | 0.3554 |
| SQHERDPWYSWDQPGLR                     | 2158.3             | 3            | 3.4968 | 0.2621 |
| SQHKEELGAVR                           | 1254.4             | 2            | 2.4355 | 0.2833 |
| SQHPYVLTEDTLK                         | 1531.7             | 2            | 3.5653 | 0.4188 |
| SQHSGNAQVTQTK                         | 1386.5             | 2            | 3.8846 | 0.4142 |
| SQIDDLYSTIKV                          | 1382.5             | 2            | 3.7327 | 0.17   |
| SQIEQLKQQNYQQASSFPPHEELLK             | 2972.3             | 3            | 4.5234 | 0.4138 |
| SQIFSTASDNQPTVTIK                     | 1838.0             | 2            | 5.7426 | 0.4818 |
| SQIGNTESELKK                          | 1334.5             | 2            | 2.9175 | 0.1027 |
| SQIGNTESELKKLAEENPDLQEAYIAK           | 3020.3             | 3            | 5.9801 | 0.4218 |
| SQIHDIVLVGGSTR                        | 1482.7             | 2            | 4.5995 | 0.4657 |
| SQILKHPSLAR                           | 1250.5             | 2            | 3.0533 | 0.1405 |
| SQKADSPSIDYAELLQHFEK                  | 2307.5             | 2            | 3.5933 | 0.4407 |
| SQKADSPSIDYAELLQHFEKVQNK              | 2777.0             | 3            | 3.973  | 0.1048 |
| SQKEINDMK                             | 1093.2             | 2            | 2.4591 | 0.1225 |
| SQKELPTEPPYTAYVGNLFPNTVQGDIDAIFK      | 3554.9             | 3            | 5.1994 | 0.4419 |
| SQKELPTEPPYTAYVGNLFPNTVQGDIDAIFKDLSIR | 4139.6             | 3            | 6.34   | 0.5068 |
| SQKLGDSSESVSK                         | 1265.4             | 2            | 3.141  | 0.2976 |
| SQKPVMVK                              | 917.2              | 2            | 2.421  | 0.1007 |

| Peptide Sequence             | Peptide mass (m/z) | Charge State | Xcorr  | DelCn2 |
|------------------------------|--------------------|--------------|--------|--------|
| SQKVDTLPLYVPEPIKVAIAENLLDVIK | 2994.5             | 3            | 3.6006 | 0.2392 |
| SQLDIIHSLK                   | 1267.5             | 2            | 3.0855 | 0.2805 |
| SQLDIIHSLKK                  | 1395.7             | 2            | 4.1626 | 0.3201 |
| SQDLDFDDVGTFFASGPPK          | 1895.1             | 2            | 5.755  | 0.5007 |
| SQLEAIFLR                    | 1077.3             | 2            | 2.9942 | 0.2466 |
| SQLEEKENKKFPVFK              | 1852.1             | 2            | 4.2216 | 0.3684 |
| SQLEESISQLR                  | 1290.4             | 2            | 3.9302 | 0.3408 |
| SQLGAHHTTPVGDGAAGTR          | 1833.9             | 2            | 5.5284 | 0.5077 |
| SQLLGSAHEVQR                 | 1325.5             | 2            | 3.7219 | 0.3082 |
| SQLLKDPQVLFAGYK              | 1708.0             | 2            | 2.831  | 0.1177 |
| SQLLKDPQVLFAGYKVPHPLEHK      | 2646.1             | 3            | 5.4051 | 0.3502 |
| SQLNSQSVEITK                 | 1334.5             | 2            | 4.1623 | 0.3111 |
| SQLNSQSVEITKLQTEKQELLQK      | 2674.0             | 3            | 4.4997 | 0.1396 |
| SQLPTLEQDGGTQNPVSSPGMSQELR   | 2758.0             | 3            | 4.8515 | 0.4113 |
| SQLVYQSR                     | 981.1              | 2            | 2.4728 | 0.2974 |
| SQMAAVEPERTPLQR              | 1713.9             | 2            | 3.4295 | 0.2616 |
| SQMDGLIPGVEPR                | 1399.6             | 2            | 3.3433 | 0.1072 |
| SQNIVTDSSSLSAEAIR            | 1778.9             | 2            | 3.6707 | 0.2855 |
| SQNKEDYAGLKEEFR              | 1814.9             | 3            | 3.9306 | 0.2343 |
| SQNKEDYAGLKEEFRK             | 1943.1             | 2            | 5.26   | 0.4171 |
| SQNQQYLVR                    | 1136.2             | 2            | 2.951  | 0.1925 |
| SQNVMAAASIANIVK              | 1517.8             | 2            | 5.8408 | 0.4761 |
| SQPAILLLTAAR                 | 1254.5             | 2            | 3.4327 | 0.2911 |
| SQPAILLLTAARDAEEALR          | 2039.3             | 2            | 3.3154 | 0.1275 |
| SQPERDWVLNEFR                | 1676.8             | 2            | 2.4353 | 0.4009 |
| SQPHSLATETR                  | 1227.3             | 2            | 2.4325 | 0.1636 |
| SQPLQNVSTVLQKNPLYNQNTDMVQK   | 3086.5             | 3            | 3.3686 | 0.1454 |
| SQPVYIQYSNHR                 | 1492.6             | 2            | 3.5924 | 0.4314 |
| SQQHHGLAADLGK                | 1362.5             | 2            | 3.3824 | 0.3696 |
| SQQLIEWVKDTYSPDEHLWATLQR     | 2945.2             | 3            | 4.2683 | 0.2446 |
| SQQSEVTR                     | 935.0              | 2            | 2.5264 | 0.1272 |
| SQQTISQLHSTVHLIEFAR          | 2196.5             | 3            | 4.4334 | 0.3412 |
| SQREDEEEEEGENYQK             | 1999.9             | 2            | 5.0822 | 0.4467 |
| SQREDEEEEEGENYQKGER          | 2342.3             | 3            | 6.4295 | 0.3961 |
| SQRPEESEPLEK                 | 1429.5             | 2            | 3.373  | 0.1848 |
| SQSAAVTPSSTTSSTR             | 1568.6             | 2            | 3.8229 | 0.3276 |

| Peptide Sequence                                | Peptide mass (m/z) | Charge State | Xcorr  | DelCn2 |
|-------------------------------------------------|--------------------|--------------|--------|--------|
| SQSGGYSDR                                       | 956.9              | 2            | 2.8319 | 0.3219 |
| SQSHLPYFTPQPPQDSAVIK                            | 2241.5             | 3            | 3.504  | 0.2603 |
| SQSLTNAFNLPEPAPPRPSLSQDEVKAETIR                 | 3394.7             | 3            | 5.0056 | 0.4354 |
| SQSSDTEQQSPTSGGGK                               | 1681.7             | 2            | 5.5149 | 0.4666 |
| SQSSHSYDDSTLPLIDR                               | 1922.0             | 2            | 5.4174 | 0.4606 |
| SQSSHSYDDSTLPLIDRNQK                            | 2292.4             | 3            | 4.2916 | 0.3248 |
| SQSSNDTFPTAMHIAAAIEVHEVLLPGLQK                  | 3206.6             | 3            | 5.3356 | 0.4803 |
| SQTDKDYQLQAILEAERR                              | 2328.5             | 3            | 3.3334 | 0.1705 |
| SQTEAVTFLANHDDSR                                | 1791.9             | 2            | 3.649  | 0.3784 |
| SQTGVGELTTQNTR                                  | 1492.6             | 2            | 3.9608 | 0.4338 |
| SQTHSLPAPESPEPAAPPRPQTPENGPEASD                 | 3193.3             | 3            | 5.0106 | 0.3223 |
| SQTHSLPAPESPEPAAPPRPQTPENGPEASDPSEELEALASLLQELR | 4973.3             | 3            | 5.4558 | 0.5316 |
| SQTTGFPSLITIFSAPNYLDVYNNK                       | 2792.1             | 3            | 3.6696 | 0.2128 |
| SQVDHVIWPDGKR                                   | 1537.7             | 3            | 4.1564 | 0.279  |
| SQVDKLTLSR                                      | 1248.4             | 2            | 3.1556 | 0.2317 |
| SQVEEELFSVR                                     | 1323.4             | 2            | 3.5966 | 0.3597 |
| SQVFSTAADGQTQVEIK                               | 1810.0             | 2            | 5.3896 | 0.5057 |
| SQVMDEATALQLR                                   | 1462.7             | 2            | 4.4969 | 0.3762 |
| SQVMDEATALQLREGLTSIEEVTKNLQK                    | 3133.5             | 3            | 4.8812 | 0.2778 |
| SQVTNYLGIWMR                                    | 1597.8             | 2            | 4.3789 | 0.4472 |
| SQVVAGTNYFIK                                    | 1327.5             | 2            | 3.3663 | 0.3011 |
| SQWSPALTISK                                     | 1218.4             | 2            | 2.7607 | 0.2044 |
| SQYAHYFDLSLVNNGVDETLKK                          | 2542.8             | 3            | 3.5638 | 0.22   |
| SQYEVMAEQNR                                     | 1355.5             | 2            | 4.3314 | 0.4723 |
| SQYEVMAEQNRK                                    | 1483.6             | 2            | 3.1435 | 0.2409 |
| SQYSGQLHEVR                                     | 1304.4             | 2            | 2.8088 | 0.2856 |
| SRAEAALIEESR                                    | 1348.4             | 2            | 3.2314 | 0.2247 |
| SRAEAESMYQIKYEELQSLAGK                          | 2532.8             | 3            | 5.8287 | 0.4683 |
| SRAEAESMYQIKYEELQSLAGKHGDDLRL                   | 3226.5             | 3            | 4.9301 | 0.4808 |
| SRAEAESMYQIKYEELQSLAGKHGDDLRR                   | 3382.7             | 3            | 3.507  | 0.1778 |
| SRANEEYGLR                                      | 1195.3             | 2            | 2.9057 | 0.2163 |
| SRDESASETSTPSEHSAAPSPQVEVR                      | 2742.8             | 3            | 4.5824 | 0.374  |
| SRDEWDKLAR                                      | 1276.4             | 2            | 2.6674 | 0.1016 |
| SRDLIKDKIEPSAK                                  | 1600.8             | 2            | 2.8243 | 0.1408 |
| SRDLLVQQASQCLSK                                 | 1676.9             | 2            | 4.1793 | 0.4461 |
| SRDNGPDGMEPEGVIESNWNIVDSFDDMNLSESLLR            | 4169.4             | 3            | 6.3844 | 0.4479 |

| Peptide Sequence                           | Peptide mass (m/z) | Charge State | Xcorr  | DelCn2 |
|--------------------------------------------|--------------------|--------------|--------|--------|
| SRDSDESGDKTTR                              | 1454.4             | 2            | 2.8027 | 0.1275 |
| SRDVAQLGDVVHGVESLVELLWTEEMRDLVQR           | 3738.2             | 3            | 4.454  | 0.2854 |
| SREIDSPVSFLALHNQIR                         | 2154.4             | 3            | 4.7702 | 0.3355 |
| SREDLSAQPVQTK                              | 1459.6             | 2            | 4.2262 | 0.2803 |
| SREDLSAQPVQTKFPAYER                        | 2223.4             | 3            | 3.3645 | 0.1443 |
| SREEAAAGTIPGALNIPVSELESALQMEPAAFQALYSAEKPK | 4387.9             | 3            | 5.5727 | 0.4887 |
| SREEDDVTKDIVLR                             | 1675.8             | 2            | 4.7004 | 0.3428 |
| SREHGIAMR                                  | 1057.2             | 2            | 2.4382 | 0.1598 |
| SREIFLSQPILLELEAPLK                        | 2197.6             | 2            | 4.8981 | 0.3985 |
| SREQILDQLKNEILTSGNIPPNYQYIFQPISASAK        | 3978.5             | 3            | 4.8657 | 0.4326 |
| SREVLELGQVLDTGKR                           | 1801.0             | 3            | 5.1324 | 0.2401 |
| SREYQLNDSAAYYLNDLER                        | 2321.4             | 2            | 5.6103 | 0.3717 |
| SREYQLNDSAK                                | 1311.4             | 2            | 3.8095 | 0.2584 |
| SREYQLNDSASYLNDLDRISQSNIPTQQDVLR           | 4067.3             | 3            | 3.8448 | 0.1553 |
| SRFDLEKYNQLKDAIAQAEMDLKR                   | 2884.3             | 3            | 5.3983 | 0.4228 |
| SRFEYPPPPVSLGSSSHTAR                       | 2173.4             | 3            | 5.2096 | 0.3846 |
| SRGELDLQLQEYQHSLER                         | 2202.4             | 3            | 3.5452 | 0.167  |
| SRGFGFVLFK                                 | 1158.4             | 2            | 2.8344 | 0.1671 |
| SRGFGFVTFADPASVDKVLGQPHHELDK               | 3143.5             | 3            | 4.2105 | 0.2402 |
| SRGPPRPRPAPAVGEAEDKENQQATSGPNQPSVR         | 3582.8             | 3            | 4.0178 | 0.1256 |
| SRKESYSIYVYK                               | 1523.7             | 3            | 3.6493 | 0.3175 |
| SRKESYSVYVYK                               | 1509.7             | 2            | 4.6012 | 0.4689 |
| SRLDQELKLIGEYGLR                           | 1891.2             | 2            | 4.5693 | 0.4525 |
| SRLEQEIATYR                                | 1366.5             | 2            | 4.1008 | 0.3034 |
| SRLGDLYEEEMR                               | 1498.6             | 2            | 3.2547 | 0.3461 |
| SRLNATASLEQER                              | 1475.6             | 2            | 4.0681 | 0.3176 |
| SRNPDFLLHIIQR                              | 1609.9             | 3            | 3.5339 | 0.1361 |
| SRNTDEMVELR                                | 1350.5             | 2            | 3.175  | 0.313  |
| SRPAGGSVPSSGR                              | 1286.4             | 2            | 2.7237 | 0.2815 |
| SRPAHSLPPGEDGRVEPYVDFAEFYR                 | 2993.2             | 3            | 3.2837 | 0.1463 |
| SRPAPSPESIKR                               | 1325.5             | 2            | 2.8199 | 0.1917 |
| SRPFTVAASFQSTSVK                           | 1713.9             | 2            | 4.9146 | 0.4438 |
| SRPQGLTEAEQR                               | 1372.5             | 2            | 2.5742 | 0.1362 |
| SRPTSFADLAAR                               | 1421.5             | 2            | 2.4551 | 0.2228 |
| SRPVDPSVPFDSK                              | 1431.6             | 2            | 3.2972 | 0.2773 |
| SRQELEQHSVDTASTSDAVTFITYVQSLK              | 3242.5             | 3            | 7.4598 | 0.5596 |

| Peptide Sequence                 | Peptide mass (m/z) | Charge State | Xcorr  | DelCn2 |
|----------------------------------|--------------------|--------------|--------|--------|
| SRQELEQHSVDTASTSDAVTFITYVQSLKR   | 3398.7             | 3            | 6.7507 | 0.4452 |
| SRQPSYVPAPLRK                    | 1499.7             | 2            | 2.6248 | 0.1023 |
| SRSEVDLTR                        | 1063.1             | 2            | 2.7198 | 0.146  |
| SRSGALEPPTSAPPTLALVPGGAAAR       | 2445.8             | 3            | 3.6186 | 0.1398 |
| SRSGEGEVSGLMR                    | 1365.5             | 2            | 2.9942 | 0.2727 |
| SRSVIEQGGIQTVDQLIKELPELLQR       | 2951.4             | 3            | 5.7037 | 0.3325 |
| SRTLTAVHDAILEDLVFPSEIVGKR        | 2768.2             | 3            | 4.4977 | 0.3366 |
| SRTPSASNDDQQE                    | 1435.4             | 2            | 3.5084 | 0.3552 |
| SRVEQEAEAK                       | 1204.3             | 2            | 2.912  | 0.1363 |
| SRVVGNPFDKTEQGPQVDETQFK          | 2694.9             | 3            | 4.3919 | 0.4295 |
| SRYDSIDSYLSK                     | 1434.5             | 2            | 2.9333 | 0.2449 |
| SSAEYSVHK                        | 1008.1             | 2            | 2.6615 | 0.1719 |
| SSAFGTLNWFTK                     | 1359.5             | 2            | 2.4013 | 0.1312 |
| SSAIVEIFSK                       | 1081.2             | 2            | 2.7528 | 0.1891 |
| SSALQWLTPEQTSGKEHPYLFSQCQAIHCR   | 3447.8             | 3            | 5.1538 | 0.2322 |
| SSALREEVQSLREEAEK                | 1962.1             | 2            | 2.7359 | 0.1636 |
| SSANVEEAFFTLAR                   | 1542.7             | 2            | 4.4524 | 0.2992 |
| SSAPAQEEEEEDPLAYYENHTSQIEIVR     | 3107.2             | 3            | 3.68   | 0.2162 |
| SSAQDPQAVLGALGR                  | 1470.6             | 2            | 4.9072 | 0.4022 |
| SSASAPDVEDDPEAFPALA              | 1760.8             | 2            | 2.9654 | 0.2227 |
| SSASFSTTAVSAR                    | 1272.3             | 2            | 2.8465 | 0.266  |
| SSASSWSEEPVQSNMDISTGHMILSYMEDHLK | 3598.9             | 3            | 4.3519 | 0.2623 |
| SSAVDPEPQVK                      | 1157.3             | 2            | 3.0059 | 0.2723 |
| SSAVDPEPQVKLEDVLPLAFTR           | 2412.7             | 2            | 4.9693 | 0.4888 |
| SSAYESLMEIVK                     | 1357.6             | 2            | 3.5844 | 0.3116 |
| SSDDGFQIR                        | 1122.2             | 2            | 2.8291 | 0.2206 |
| SSDEEGSQDESLDSK                  | 1613.5             | 2            | 4.562  | 0.3439 |
| SSDPDYLAAVDKWLGVLLPK             | 2188.5             | 2            | 3.2283 | 0.1885 |
| SSDRLEAAQR                       | 1248.3             | 2            | 2.4704 | 0.1408 |
| SSEEDKKEEEVK                     | 1437.5             | 2            | 3.1556 | 0.1566 |
| SSEEDKKEEEVKK                    | 1565.7             | 3            | 4.133  | 0.2673 |
| SSEEEKRVTVIK                     | 1405.6             | 2            | 3.4808 | 0.1744 |
| SSEEEKRVTVIKAPHYPGIGPVDESGIPTAIR | 3434.8             | 3            | 4.5382 | 0.2699 |
| SSEFFEMLEK                       | 1247.4             | 2            | 3.5481 | 0.2212 |
| SSEHVHSQGR                       | 1124.1             | 2            | 3.0111 | 0.3062 |
| SSEIEQAVQSLDR                    | 1462.5             | 2            | 3.1741 | 0.189  |

| Peptide Sequence                    | Peptide mass (m/z) | Charge State | Xcorr  | DelCn2 |
|-------------------------------------|--------------------|--------------|--------|--------|
| SSEIEQAVQSLDRNGVDLLMK               | 2333.6             | 2            | 3.9536 | 0.3595 |
| SSEKVFVSLPTELEDLIPEVEEFYKK          | 3057.4             | 3            | 4.1187 | 0.1891 |
| SSELRPGEFVVAIGSPFSLQNTVTTGIVSTTQR   | 3480.9             | 3            | 4.9144 | 0.4241 |
| SSEMGIEENVILGMPHR                   | 1771.1             | 2            | 2.6257 | 0.115  |
| SSEMNVLIPTEGGDFNEFPVPEQFK           | 2813.1             | 2            | 4.0819 | 0.4114 |
| SSEMNVLIPTEGGDFNEFPVPEQFKTLWNGQK    | 3641.0             | 3            | 3.734  | 0.18   |
| SSENGHIHSTSLQHIK                    | 1775.9             | 2            | 3.6103 | 0.2167 |
| SSENPNEVFR                          | 1179.2             | 2            | 2.8088 | 0.1206 |
| SSEPEHQEALQPVNLSELESIVTERPQFSR      | 3438.7             | 3            | 4.5011 | 0.3232 |
| SSEPQVQHEESIRKPSPEPR                | 2190.4             | 2            | 2.6728 | 0.1163 |
| SSEQILATLKGHTK                      | 1513.7             | 2            | 3.075  | 0.2772 |
| SSESDHFSYVQLR                       | 1555.6             | 2            | 3.2018 | 0.214  |
| SSFADISNLLQIEPR                     | 1690.9             | 2            | 4.2268 | 0.2097 |
| SSFDEMLPGTHFQR                      | 1652.8             | 2            | 3.5597 | 0.319  |
| SSFDQMVSQTSFQR                      | 1577.7             | 2            | 4.0681 | 0.3624 |
| SSFDWLTGSSTDPLVDHTSPSSDLSLLFAHK     | 3236.4             | 3            | 4.1654 | 0.3089 |
| SSFDWLTGSSTDPLVDHTSPSSDLSLLFAHKR    | 3392.6             | 3            | 6.2685 | 0.5394 |
| SSFFIEPQKPVFPETR                    | 1910.2             | 3            | 3.4147 | 0.2792 |
| SSFHSDPQHWLSR                       | 1584.7             | 2            | 2.9188 | 0.2733 |
| SSFREEDNTYR                         | 1404.4             | 2            | 2.4924 | 0.24   |
| SSFSHYSGLK                          | 1113.2             | 2            | 3.2289 | 0.3317 |
| SSFSHYSGLKHEDK                      | 1622.7             | 2            | 3.268  | 0.1611 |
| SSFSQHAR                            | 920.0              | 2            | 2.4394 | 0.1161 |
| SSFYPDGGDQETAK                      | 1502.5             | 2            | 2.7981 | 0.3134 |
| SSFYVNGLTLGGQK                      | 1471.6             | 2            | 4.8158 | 0.3833 |
| SSGATPVSGPPPPSASSTPAGQPTAVSR        | 2549.7             | 3            | 4.1094 | 0.3186 |
| SSGFGLEFNSFQHQLR                    | 1855.0             | 3            | 3.3172 | 0.3078 |
| SSGFLSNLLGGH                        | 1189.3             | 2            | 2.6364 | 0.1912 |
| SSGFPVHLLPDIAEPGSVAGR               | 2107.4             | 3            | 3.9459 | 0.2589 |
| SSGGAYPNIPLSSPLPGVPKPVFATVDGQEKFETK | 3617.1             | 3            | 4.8824 | 0.3013 |
| SSGGGYSGDR                          | 942.9              | 2            | 2.8627 | 0.1528 |
| SSGGREDLESSGLQR                     | 1578.6             | 2            | 4.4515 | 0.3578 |
| SSGGSEHSTEGSVSLGDGQLNR              | 2162.2             | 3            | 3.6066 | 0.1617 |
| SSGIVSLGVGDR                        | 1147.3             | 2            | 3.0056 | 0.1441 |
| SSGLESSEAR                          | 1023.0             | 2            | 2.8163 | 0.1813 |
| SSGLPNIPVQTISR                      | 1469.7             | 2            | 3.4184 | 0.2548 |

| Peptide Sequence                           | Peptide mass (m/z) | Charge State | Xcorr  | DelCn2 |
|--------------------------------------------|--------------------|--------------|--------|--------|
| SSGLTAVWVAR                                | 1147.3             | 2            | 2.8225 | 0.1327 |
| SSGMPTDQESLSSGDAVLQR                       | 2066.2             | 2            | 2.5973 | 0.142  |
| SSGMTLDNISR                                | 1181.3             | 2            | 2.4137 | 0.1522 |
| SSGNSSSSGSGSGSTSAGSSSPGAR                  | 2104.0             | 2            | 6.1729 | 0.5949 |
| SSGPPATFPSSK                               | 1163.3             | 2            | 3.2887 | 0.3525 |
| SSGPPPPSGSSGSEAAAGAGAAAPASQHPATGTGAVQTEAMK | 3705.9             | 3            | 5.3912 | 0.3296 |
| SSGPTSLFAVTVAPPGAR                         | 1715.9             | 3            | 3.3059 | 0.2981 |
| SSGPYGGGGQYFAKPR                           | 1629.8             | 2            | 3.8999 | 0.4414 |
| SSGSPYGGGYGSGGGSGGYGSR                     | 1911.9             | 2            | 5.2369 | 0.5742 |
| SSGTASSVAFTPLQGLEIVNPQAAEKK                | 2732.0             | 3            | 3.3922 | 0.2572 |
| SSGVAPAASPAAPSPGSSGGGGFFSSLSNAVK           | 2808.0             | 3            | 5.1272 | 0.4545 |
| SSGVPVDGFYTEEVR                            | 1642.7             | 2            | 2.9918 | 0.2564 |
| SSHLKGQAVPASK                              | 1310.5             | 2            | 3.5077 | 0.3603 |
| SSHLPTEVIEKPPAVPVSFEFSDAKDENER             | 3356.6             | 3            | 6.9119 | 0.5232 |
| SSHSNAYFYGFFK                              | 1555.7             | 2            | 3.9846 | 0.465  |
| SSHSNQTNHKPSPDQIIQPLLELDQNR                | 3098.3             | 3            | 4.7016 | 0.2799 |
| SSHVTIDTLKGVK                              | 1385.6             | 2            | 3.0067 | 0.3284 |
| SSHYDELLAAEAR                              | 1462.5             | 2            | 3.8059 | 0.3328 |
| SSIAGLLLK                                  | 902.1              | 2            | 2.8918 | 0.1643 |
| SSIDSEPALVLGPLK                            | 1526.8             | 2            | 3.943  | 0.4609 |
| SSIFDADEEKS                                | 1356.4             | 2            | 2.6187 | 0.2025 |
| SSIHISNLEPELR                              | 1495.7             | 2            | 2.9455 | 0.2106 |
| SSIHNFMTHEEFR                              | 1603.8             | 2            | 3.565  | 0.2831 |
| SSILLDVKPWDEETDMAKLEECVR                   | 2794.2             | 3            | 5.4295 | 0.246  |
| SSILQHERPASLYQSSIDR                        | 2188.4             | 3            | 4.31   | 0.3609 |
| SSILQHERPPPLPTTPTVPR                       | 2321.7             | 3            | 5.5224 | 0.4711 |
| SSIMAFIGNK                                 | 1139.4             | 2            | 2.9539 | 0.1688 |
| SSKAVVHGILMGVPVPFPIPEPDGCKSGINCPIQK        | 3617.3             | 3            | 5.0965 | 0.3164 |
| SSKDVPLTIKDPAVGFLETISPGYSIHTYLWR           | 3593.1             | 3            | 5.2451 | 0.3649 |
| SSKEESLPKPK                                | 1230.4             | 2            | 2.6385 | 0.1613 |
| SSKELDFLREENHK                             | 1732.9             | 2            | 3.3247 | 0.1915 |
| SSKELLQPVTISR                              | 1571.8             | 2            | 4.2383 | 0.3469 |
| SSKGELTTLIHQLQEK                           | 1813.0             | 2            | 4.5309 | 0.445  |
| SSKGELTTLIHQLQEKDK                         | 2056.3             | 2            | 4.2869 | 0.3648 |
| SSKGELTTLIHQLQEKDKLLAAVKEDAAATK            | 3338.8             | 3            | 6.8216 | 0.4286 |
| SSLDNIEMAYAR                               | 1370.5             | 2            | 3.5903 | 0.1515 |



| Peptide Sequence                   | Peptide mass (m/z) | Charge State | Xcorr  | DelCn2 |
|------------------------------------|--------------------|--------------|--------|--------|
| SSLGAPAIASAASFLQDLIHR              | 2055.3             | 2            | 4.3721 | 0.4923 |
| SSLGPVGLDKMLVDDIGDVTITNDGATILK     | 3059.5             | 3            | 4.455  | 0.2753 |
| SSLGSHQLPR                         | 1082.2             | 2            | 2.6272 | 0.1883 |
| SSLHYKPTPDLR                       | 1414.6             | 3            | 3.5168 | 0.2062 |
| SSLLAENQVLMER                      | 1490.7             | 2            | 2.6657 | 0.3084 |
| SSLLDDLLTESEDMAQR                  | 1924.1             | 2            | 3.2897 | 0.3295 |
| SSLRGLAGEIVGEVR                    | 1543.8             | 2            | 2.6792 | 0.2365 |
| SSLSSAQADFNQLAELDR                 | 1953.1             | 2            | 5.4866 | 0.4842 |
| SSLSVPYVIVPLKTGLQEVEVK             | 2386.8             | 3            | 3.2297 | 0.4205 |
| SSLTQHSWQSLKDR                     | 1673.8             | 2            | 3.4023 | 0.1041 |
| SSLVSALLGEMEKLEGK                  | 1792.1             | 2            | 4.3998 | 0.435  |
| SSMNVDEAFSSLAR                     | 1514.6             | 2            | 2.9067 | 0.3195 |
| SSNADAEKELDR                       | 1335.4             | 2            | 3.1012 | 0.3077 |
| SSNLLDLKNPFFR                      | 1551.8             | 2            | 3.2753 | 0.2471 |
| SSPEPVALTESETEYVIR                 | 2008.2             | 2            | 4.8464 | 0.461  |
| SSPEQPIGQGR                        | 1156.2             | 2            | 2.5752 | 0.1078 |
| SSPGLYTSPGQDSLQPTAVSPPYGGDISPVSPSR | 3403.7             | 3            | 4.4974 | 0.3281 |
| SSPHGSLGSVVNSLSGLKLDNILSGPK        | 2665.0             | 3            | 3.3813 | 0.2654 |
| SSPLDNKLNVEDVDSTK                  | 1862.0             | 2            | 4.8325 | 0.5148 |
| SSPLDNKLNVEDVDSTKNRK               | 2260.4             | 3            | 4.1094 | 0.3371 |
| SSPQFGVTLLTYELLQR                  | 1953.2             | 2            | 3.5744 | 0.3024 |
| SSPSFSSLHYQDAGNYVCETALQEVEGLK      | 3161.4             | 3            | 4.2764 | 0.2398 |
| SSPSHTISRPIPIPIR                   | 1777.1             | 2            | 3.2231 | 0.1749 |
| SSPSKHQPPPIR                       | 1331.5             | 2            | 2.5338 | 0.205  |
| SSPTDKHTLVK                        | 1213.4             | 2            | 2.7411 | 0.2248 |
| SSPVDLVTATDQKVEK                   | 1717.9             | 2            | 4.4375 | 0.4082 |
| SSPVVIDASTAIDAPSNLR                | 1914.1             | 3            | 4.1872 | 0.2899 |
| SSPVVNDGVVR                        | 1129.2             | 2            | 2.837  | 0.183  |
| SSPYPTDVAR                         | 1093.2             | 2            | 2.677  | 0.2507 |
| SSQEQGELQGR                        | 1219.2             | 2            | 3.5196 | 0.1367 |
| SSQESGEEAGSQENHPQESK               | 2146.1             | 2            | 4.5808 | 0.4442 |
| SSQFLAPK                           | 878.0              | 2            | 2.738  | 0.155  |
| SSQGGSLPSEEK                       | 1206.2             | 2            | 3.6581 | 0.3336 |
| SSQHKQDLTEK                        | 1301.4             | 2            | 3.4047 | 0.2159 |
| SSQIGAVVSHQSSVIPDREYLR             | 2429.7             | 3            | 4.6216 | 0.4603 |
| SSQPLASK                           | 817.9              | 2            | 2.5425 | 0.168  |

| Peptide Sequence                   | Peptide mass (m/z) | Charge State | Xcorr  | DelCn2 |
|------------------------------------|--------------------|--------------|--------|--------|
| SSQPLASKQEK                        | 1203.3             | 2            | 2.6489 | 0.3012 |
| SSQPLASKQEKDGTEKR                  | 1890.0             | 2            | 4.2014 | 0.3331 |
| SSQSEALLNITNNGIHFAPLQFTTDEEMMIK    | 3481.9             | 3            | 4.5026 | 0.2247 |
| SSQSSSQQFSGIGR                     | 1456.5             | 2            | 4.2158 | 0.4401 |
| SSQTSGTNEQSSAIVSAR                 | 1810.9             | 2            | 5.2077 | 0.4604 |
| SSRLEEDDGDVAMSDAQDGPR              | 2251.3             | 3            | 3.8653 | 0.105  |
| SSRLPDIFEAQIAGLR                   | 1774.0             | 3            | 4.997  | 0.3622 |
| SSRPEFDWQDPLVLEEQLTTDEILIR         | 3131.4             | 3            | 3.6742 | 0.1787 |
| SSRPEFDWQDPLVLEEQLTTDEILIRDTFR     | 3651.0             | 3            | 3.5696 | 0.2597 |
| SSSADFGTFNTSQSHQTASAVSK            | 2346.4             | 2            | 5.3777 | 0.5415 |
| SSSAGGQGSYVPLLR                    | 1479.6             | 2            | 2.6882 | 0.2472 |
| SSSFSDTLEESSPIAAIFDTENLEK          | 2718.9             | 3            | 3.351  | 0.138  |
| SSSGAEHPEPK                        | 1126.2             | 2            | 3.0971 | 0.1746 |
| SSSGLLEWESK                        | 1223.3             | 2            | 3.5576 | 0.3541 |
| SSSGLLEWESKSDALETLGFLNHQMK         | 3072.4             | 3            | 4.9319 | 0.3214 |
| SSSILKGMELSVLDSLNR                 | 2021.3             | 3            | 4.3649 | 0.2683 |
| SSSMAAGLER                         | 1009.1             | 2            | 2.6585 | 0.1118 |
| SSSNLALALYR                        | 1195.4             | 2            | 2.7512 | 0.1366 |
| SSSPELVTHLK                        | 1198.4             | 2            | 2.6808 | 0.2032 |
| SSSPELVTHLKWDDPYYDIAR              | 2493.7             | 3            | 4.1617 | 0.2836 |
| SSSPSEILQELGKGSTHPQPGVSPPAAPAAPGPK | 3278.6             | 3            | 5.1951 | 0.3529 |
| SSSQTSGLVSK                        | 1168.2             | 2            | 2.9105 | 0.2838 |
| SSSSGGYGGGYGGVLTASDGLLAGNEK        | 2462.6             | 2            | 5.4463 | 0.4217 |
| SSSSGHVSWVK                        | 1324.4             | 2            | 2.5746 | 0.183  |
| SSSLLASPGHISVKEPTPSIASDISLPIATQELR | 3591.0             | 3            | 6.2847 | 0.5259 |
| SSSQTLTQFDSNIAPADPDTAIVHPVPIR      | 3166.4             | 3            | 4.6227 | 0.2579 |
| SSSVGSSSSYPISPAVSR                 | 1755.9             | 2            | 4.8487 | 0.4214 |
| SSSVTSIDKESR                       | 1296.4             | 2            | 2.7145 | 0.1326 |
| SSTFNSQEPHNILPLASSQIR              | 2327.5             | 3            | 4.1208 | 0.2274 |
| SSTPLPTISSAENTR                    | 1648.8             | 2            | 3.2309 | 0.2879 |
| SSTSEGLLLKIDPLLPKEVKNEESEKEDA      | 3200.5             | 3            | 4.0375 | 0.2613 |
| SSTTSMTSVPKPLK                     | 1464.7             | 2            | 3.2715 | 0.3285 |
| SSTVGLVTLNDMK                      | 1365.6             | 2            | 2.6113 | 0.2194 |
| SSTVTEAPIAVVTSR                    | 1518.7             | 2            | 2.8807 | 0.1128 |
| SSVAADVISLLLNGDGGVGR               | 1901.1             | 3            | 5.43   | 0.3397 |
| SSVLENFVGR                         | 1108.2             | 2            | 2.7418 | 0.2401 |

| Peptide Sequence                      | Peptide mass (m/z) | Charge State | Xcorr  | DelCn2 |
|---------------------------------------|--------------------|--------------|--------|--------|
| SSVLENFVGRDFLPR                       | 1737.0             | 3            | 3.6573 | 0.3528 |
| SSVNSHMTQSTDSR                        | 1537.6             | 2            | 3.8798 | 0.4088 |
| SSVSGIVATVFGATGFLGR                   | 1827.1             | 2            | 5.0226 | 0.5019 |
| SSVSHSVLSEMQVIEQETPVSAK               | 2473.7             | 3            | 3.5077 | 0.1241 |
| SSVSSRSIFK                            | 1098.2             | 2            | 2.5819 | 0.2714 |
| SSVVGGFVSHYLLEK                       | 1622.8             | 2            | 3.6358 | 0.2774 |
| SSWWTHVEMGPPDPILGVTEAFKR              | 2742.1             | 3            | 5.8835 | 0.5455 |
| SSYEKLQSSLESEVSVLASK                  | 2172.4             | 2            | 3.0467 | 0.2224 |
| SSYPVMGFQVR                           | 1547.8             | 2            | 2.708  | 0.3545 |
| SSYYMIGEYK                            | 1206.4             | 2            | 2.635  | 0.1996 |
| SSYYVVSNDPAAEEPSR                     | 1929.0             | 2            | 5.1321 | 0.3713 |
| SSYYVVSNDPAAEEPSRAVLDALEGGK           | 2939.2             | 3            | 4.7682 | 0.4061 |
| STAEGEAFIQALPGSGTTPLLR                | 2217.5             | 2            | 4.7955 | 0.3696 |
| STAGDTHLGGEDFDNR                      | 1692.7             | 2            | 4.5894 | 0.4525 |
| STAGDTHLGGEDFDNRMVNHFAIEFK            | 2910.1             | 3            | 4.0274 | 0.2792 |
| STAISLFYELSENDLNFIK                   | 2205.4             | 3            | 6.1325 | 0.3849 |
| STAISLFYELSENDLNFIKQSK                | 2548.8             | 2            | 4.7112 | 0.424  |
| STANKYQVFFFGTHETAFLGPK                | 2491.8             | 3            | 5.6736 | 0.437  |
| STANKYQVFFFGTHETAFLGPKDLFPYEEESKEK    | 3858.3             | 3            | 3.6932 | 0.2777 |
| STANNVEIHIPVPNDADSPK                  | 2119.3             | 3            | 3.7275 | 0.1947 |
| STAPSAAASASASAAASSPAGGGAEALELLEHCGVCR | 3330.6             | 3            | 5.5919 | 0.4733 |
| STAQQELDQKASPTPVIVASHTANKEEK          | 3035.3             | 3            | 6.3996 | 0.4256 |
| STAYEDYYYHPPPR                        | 1759.9             | 2            | 4.0977 | 0.4502 |
| STDFAPIKEDFGQEKKTTDDVEAMSSQPALALDER   | 3771.1             | 3            | 6.2248 | 0.5058 |
| STDHPKYSDMIVAAIQAEK                   | 2105.4             | 3            | 5.6255 | 0.3422 |
| STDHPKYSDMIVAAIQAEKNR                 | 2375.6             | 3            | 6.5116 | 0.5374 |
| STDNLNRSR                             | 921.9              | 2            | 2.5498 | 0.1165 |
| STDTFNYATYHTLEEIYDFLDLLVAENPHLVSK     | 3861.2             | 3            | 3.7423 | 0.2721 |
| STDTTKTHPTIK                          | 1330.5             | 2            | 3.1083 | 0.3322 |
| STDYGIFQINSR                          | 1401.5             | 2            | 3.7617 | 0.1744 |
| STEEARKELQAAGK                        | 1518.7             | 2            | 3.6457 | 0.2591 |
| STEEARKELQAAGKSPEDLER                 | 2345.5             | 3            | 5.0023 | 0.379  |
| STEEPTAPASPQPPNDSR                    | 1881.9             | 2            | 3.6259 | 0.4176 |
| STEEVKPIDENLGQTGK                     | 1846.0             | 3            | 3.3627 | 0.2678 |
| STESLQANVQR                           | 1233.3             | 2            | 2.6861 | 0.2824 |
| STFAGHGR                              | 832.9              | 2            | 2.5565 | 0.3128 |

| Peptide Sequence                   | Peptide mass (m/z) | Charge State | Xcorr  | DelCn2 |
|------------------------------------|--------------------|--------------|--------|--------|
| STFETEHAQQR                        | 1263.3             | 2            | 3.1945 | 0.3634 |
| STFVLDEFKR                         | 1242.4             | 2            | 3.1651 | 0.313  |
| STFVLDEFKRK                        | 1370.6             | 2            | 2.9347 | 0.2242 |
| STGDIAGTVVPETNKEPR                 | 1872.0             | 2            | 4.0432 | 0.3728 |
| STGEAFVQFASQEIAEK                  | 1843.0             | 2            | 5.4524 | 0.4949 |
| STGEAFVQFASQEIAEKALKK              | 2283.6             | 3            | 3.2837 | 0.2538 |
| STGEALVQGLMGAAVTLK                 | 1747.1             | 2            | 5.0144 | 0.4351 |
| STGEPLGHVPAR                       | 1221.3             | 2            | 3.4602 | 0.4121 |
| STGFTNLGAEGSVFPK                   | 1612.8             | 2            | 4.8858 | 0.3658 |
| STGGAPTFNVTVTK                     | 1380.5             | 2            | 3.6187 | 0.4188 |
| STGGAPTFNVTVTKTDK                  | 1724.9             | 2            | 3.9608 | 0.4132 |
| STGKENKITITNDKGR                   | 1762.9             | 2            | 4.2961 | 0.2424 |
| STGKGIVEFASKPAAR                   | 1619.8             | 2            | 2.6107 | 0.1178 |
| STGLNAVPSQILEGQWAAR                | 1999.2             | 2            | 4.5357 | 0.4084 |
| STGNFLTTLTQAIDKFSADGMR             | 2274.5             | 3            | 4.2548 | 0.4466 |
| STGPAPAGSTR                        | 1002.1             | 2            | 2.4456 | 0.1846 |
| STGVALSIAVGLLEGTFPNTGAR            | 2232.5             | 2            | 3.6509 | 0.2646 |
| STGYDPVKLFTK                       | 1356.5             | 2            | 3.1707 | 0.3079 |
| STGYSSQPGAK                        | 1083.1             | 2            | 2.4203 | 0.2726 |
| STHEFLHEVPAASEEIK                  | 2072.3             | 2            | 5.1703 | 0.4588 |
| STHGLAILGPENPK                     | 1434.6             | 2            | 4.6209 | 0.2791 |
| STHQAAIVSK                         | 1042.2             | 2            | 2.6439 | 0.196  |
| STHTLDLSR                          | 1030.1             | 1            | 2.6036 | 0.2351 |
| STHTLDLSRELSEALGQIFDSQR            | 2604.8             | 3            | 4.4313 | 0.3616 |
| STHVPVGEDQVQHMLVQDLAQGFNKK         | 3036.4             | 3            | 3.4523 | 0.2273 |
| STIETALKMEK                        | 1251.5             | 2            | 2.5384 | 0.2669 |
| STIGGQIMYLTGMVDKR                  | 1871.2             | 2            | 3.5734 | 0.3751 |
| STIGVEFATR                         | 1081.2             | 2            | 2.8125 | 0.2748 |
| STIIGESISR                         | 1063.2             | 2            | 2.4098 | 0.1358 |
| STISTELALALR                       | 1275.5             | 2            | 3.8276 | 0.2989 |
| STKDELASLKEQLEEKESVVKR             | 2577.8             | 3            | 4.612  | 0.3966 |
| STKHWELTAEGEEIAR                   | 1858.0             | 2            | 2.7776 | 0.2502 |
| STKPIVAAINGSCLEGGLEVAISCQYR        | 2709.1             | 3            | 4.0751 | 0.3065 |
| STLADYSAQKDLEPESDRSAQPLPLKIEELALAK | 3729.1             | 3            | 5.0807 | 0.4047 |
| STLEPVEK                           | 903.0              | 1            | 1.8486 | 0.1441 |
| STLEQKPSKPAAPQVPPKPTPPTK           | 2654.1             | 3            | 4.0974 | 0.3071 |

| Peptide Sequence                           | Peptide mass (m/z) | Charge State | Xcorr  | DelCn2 |
|--------------------------------------------|--------------------|--------------|--------|--------|
| STLINSFLFLTDLYPER                          | 1883.1             | 2            | 5.2181 | 0.4147 |
| STLINSFLFLDLYSPEYPGPSHR                    | 2608.9             | 3            | 4.8394 | 0.4581 |
| STLITDGSTPINLFNTAFGLLGMPGEGQPLGR           | 3276.7             | 3            | 5.2637 | 0.6044 |
| STLITDGSTPINLFNTAFGLLGMPGEGQPLGRR          | 3432.9             | 3            | 5.2107 | 0.44   |
| STLLFGQR                                   | 922.1              | 2            | 2.8593 | 0.1753 |
| STLLLLLTGK                                 | 1059.3             | 2            | 3.4284 | 0.2099 |
| STLLLYQSPTTGLFPTK                          | 1868.2             | 2            | 2.6193 | 0.1994 |
| STLMDTLFNTKFESDPATHNEPGVR                  | 2809.1             | 3            | 4.5978 | 0.3978 |
| STLNEIYFGK                                 | 1172.3             | 1            | 3.2414 | 0.3233 |
| STLNEIYFGKTKDIVNGLR                        | 2169.5             | 3            | 4.184  | 0.266  |
| STLNELVDYITISR                             | 1624.8             | 2            | 4.1908 | 0.3877 |
| STLNPQWNESFTFK                             | 1699.8             | 2            | 3.4616 | 0.2524 |
| STLPDADRERERAILAIHKEAQR                    | 2520.8             | 3            | 3.2117 | 0.2046 |
| STLQTLPEIVAK                               | 1300.5             | 2            | 3.0457 | 0.1842 |
| STLQTMESDIYTEVR                            | 1773.9             | 2            | 4.5372 | 0.4585 |
| STLVLHDLLK                                 | 1139.4             | 2            | 2.9734 | 0.2585 |
| STLVLHDLLKHTPVDHPDYPLLQDALR                | 3108.5             | 3            | 3.9191 | 0.1815 |
| STMLELEKQGLEAMEEILTSSEPLDPAEVGDLFYDCVDTEIK | 4691.2             | 3            | 5.0103 | 0.3704 |
| STMVGTPTYWMAPEVVTR                         | 1926.2             | 2            | 3.3374 | 0.3638 |
| STNGDTFLGGEDFDQALLR                        | 2057.2             | 2            | 6.3334 | 0.5737 |
| STNIAAAASEPHS                              | 1256.3             | 2            | 3.2428 | 0.1079 |
| STNLLAAETASLEEQQLQGWEVMLMADK               | 3037.4             | 3            | 3.7436 | 0.2096 |
| STNLLAAETASLEEQQLQGWEVMLMADKVLR            | 3405.9             | 3            | 4.2132 | 0.3066 |
| STNLNCSVIADVRHDGSEPCVDVLFVFGDGHR           | 3214.5             | 3            | 3.214  | 0.1555 |
| STNPGISIGDVAK                              | 1259.4             | 2            | 3.1203 | 0.2715 |
| STNVVYQAHHVS                               | 1498.6             | 2            | 4.7798 | 0.5059 |
| STPAAVGAMEDKSAEHKR                         | 1886.1             | 2            | 3.1782 | 0.2704 |
| STPAEDDSRDSQVK                             | 1535.6             | 2            | 3.3162 | 0.3109 |
| STPAEDDSRDSQVKSEVQQPVHPKPLSPDSR            | 3418.6             | 3            | 5.2851 | 0.4513 |
| STPAITLESPIKYLPLR                          | 1902.2             | 2            | 4.5169 | 0.5039 |
| STPEYFAER                                  | 1100.2             | 2            | 2.5484 | 0.3434 |
| STPKEETVNDPEEAGHR                          | 1897.0             | 2            | 4.4818 | 0.46   |
| STPTAEAEAGIGDTPSLEDEAAGHVTVQAR             | 3012.1             | 3            | 5.8868 | 0.2134 |
| STQAATQVVLNVPETR                           | 1714.9             | 2            | 3.9518 | 0.4369 |
| STQAPLIIRPDSGNPLDTVLK                      | 2236.6             | 2            | 4.4249 | 0.4441 |
| STQAPLIIRPDSGNPLDTVLKVLKLEILGK             | 2989.5             | 2            | 4.0475 | 0.3636 |

| Peptide Sequence                  | Peptide mass (m/z) | Charge State | Xcorr  | DelCn2 |
|-----------------------------------|--------------------|--------------|--------|--------|
| STQAPLIIRPDSGNPLDRTLK/VLEILGKK    | 3117.7             | 3            | 4.0579 | 0.2908 |
| STQDEINQAR                        | 1162.2             | 2            | 3.4093 | 0.2546 |
| STQGVTLTDLQEAETIGR                | 2048.2             | 3            | 3.3965 | 0.1588 |
| STQTAEDKEEPLHSIISSTESVQGSTSK      | 2978.1             | 3            | 4.9164 | 0.315  |
| STRFEEFLQR                        | 1313.4             | 2            | 3.0547 | 0.2266 |
| STSAPQMSPGSSDNQSSSPQPAQQK         | 2533.6             | 3            | 4.9409 | 0.4495 |
| STSATDTHHVMAR                     | 1543.6             | 2            | 2.4653 | 0.1521 |
| STSEFIQHIVSLVHHVK                 | 2049.3             | 2            | 3.7401 | 0.329  |
| STSHKPDEIYGMIR                    | 1764.0             | 3            | 3.7792 | 0.2387 |
| STSQGSINSPVYSR                    | 1483.6             | 2            | 4.0171 | 0.3814 |
| STTALHQENNK                       | 1243.3             | 2            | 2.8327 | 0.213  |
| STTELGENLQELRDLTQEMEVHAEKLLK      | 3143.5             | 3            | 4.9429 | 0.3999 |
| STTLDAAGNIKLAFLNSLLEKAEAR         | 2463.8             | 3            | 3.4526 | 0.1437 |
| STTLEKEVPVIFIHPLNTGLFR            | 2512.9             | 3            | 4.3147 | 0.1886 |
| STTNELKSEK                        | 1137.2             | 2            | 2.6657 | 0.1644 |
| STTRAEVDLVVQDLK                   | 1674.9             | 2            | 3.8268 | 0.2021 |
| STTRAEVDLVVQDLKQAVAQLEDQA         | 2729.0             | 3            | 4.5077 | 0.3506 |
| STTSDIPHMLNQVESK                  | 1788.0             | 2            | 4.2935 | 0.3161 |
| STTTGHLLYK                        | 1121.3             | 2            | 3.0757 | 0.406  |
| STTTSDMIAEVGAAFSK                 | 1716.9             | 2            | 3.8007 | 0.4554 |
| STTTSDMIAEVGAAFSKLFET             | 2207.4             | 2            | 2.6038 | 0.1315 |
| STTYSLESPKDPVLPAR                 | 1862.1             | 2            | 4.1687 | 0.3777 |
| STVAALLQONLYQPTGGQLLLDGGKPLPQYEHR | 3422.9             | 3            | 4.7501 | 0.2864 |
| STVASMMHR                         | 1020.2             | 2            | 2.7519 | 0.1947 |
| STVAVNMNDLGSQPHEDREPVDPTTK        | 2839.0             | 3            | 5.1279 | 0.4032 |
| STVDAEAVHK                        | 1057.1             | 2            | 2.5804 | 0.2131 |
| STVEGIQASVK                       | 1119.3             | 2            | 2.6166 | 0.2376 |
| STVLQQQYNR                        | 1237.3             | 2            | 3.2292 | 0.1501 |
| STVLTPMFVETQASQGTLLQTR            | 2296.6             | 2            | 5.9002 | 0.4575 |
| STVPTDFSSAKIEVSQLLK               | 2051.3             | 2            | 3.9035 | 0.3136 |
| STVRDIDPQNDLTFLR                  | 1891.1             | 3            | 4.0903 | 0.2917 |
| STWLILHHK                         | 1135.3             | 2            | 2.8608 | 0.1843 |
| STYIKSPFFENLTLDLQPPK              | 2436.8             | 2            | 2.5961 | 0.2203 |
| STYNHLSSWLTDR                     | 1651.8             | 2            | 3.8431 | 0.3804 |
| STYPRPHEYLSPADLPK                 | 1972.2             | 2            | 3.7584 | 0.29   |
| SVAADFIQQGIR                      | 1305.5             | 2            | 2.5339 | 0.1316 |

| Peptide Sequence               | Peptide mass (m/z) | Charge State | Xcorr  | DelCn2 |
|--------------------------------|--------------------|--------------|--------|--------|
| SVAAIHPSLEIPMLIPK              | 1817.2             | 3            | 3.4968 | 0.2729 |
| SVADGQESTPPTPAPTSGIVGALMEVMQK  | 2900.3             | 3            | 3.7951 | 0.1716 |
| SVADGQESTPPTPAPTSGIVGALMEVMQKR | 3056.5             | 3            | 3.7602 | 0.2462 |
| SVAGKEDNTDQEKKEEK              | 2152.2             | 3            | 5.0644 | 0.238  |
| SVAQQASLTEQR                   | 1318.4             | 2            | 3.2834 | 0.2418 |
| SVASFSIYSPHTGIQEYQDGVPK        | 2511.7             | 3            | 3.5549 | 0.2064 |
| SVDEVFDEVVQIFDK                | 1769.9             | 2            | 4.8633 | 0.4443 |
| SVDEVFDEVVQIFDKEG              | 1956.1             | 2            | 5.2517 | 0.4234 |
| SVDFDSLTVR                     | 1139.2             | 2            | 2.4378 | 0.2099 |
| SVDIHDSIQPR                    | 1267.4             | 2            | 2.6208 | 0.2322 |
| SVDKKVESAKESLK                 | 1548.8             | 3            | 3.6228 | 0.1162 |
| SVDNRPQAPLVASAVNEEVSK          | 2298.5             | 3            | 3.3685 | 0.167  |
| SVDNRPQAPLVASAVNEEVSKIK        | 2539.8             | 3            | 3.9336 | 0.2573 |
| SVDPDSPAEASGLR                 | 1401.5             | 2            | 2.9265 | 0.1599 |
| SVDPTLALSVYLR                  | 1434.7             | 2            | 4.1895 | 0.393  |
| SVEAAAELSAK                    | 1076.2             | 2            | 3.989  | 0.3665 |
| SVEAAAELSAKDLK                 | 1432.6             | 2            | 4.0923 | 0.3589 |
| SVEAILEESTEKLK                 | 1576.8             | 2            | 4.3619 | 0.2782 |
| SVEDAQDVSLALTQR                | 1632.8             | 2            | 5.2574 | 0.3969 |
| SVEDRFDQQKNDYDQLQK             | 2257.4             | 3            | 4.0434 | 0.3018 |
| SVEEELHQR                      | 1127.2             | 2            | 2.4589 | 0.1653 |
| SVEEGKIDGIIDK                  | 1403.6             | 2            | 3.6287 | 0.187  |
| SVEEGKIDGIIDKTIIGDFQK          | 2306.6             | 3            | 4.7007 | 0.4199 |
| SVEEGKIDGIIDKTIIGDFQKEQK       | 2692.0             | 3            | 6.215  | 0.4104 |
| SVEEISTLVQK                    | 1233.4             | 2            | 2.6614 | 0.1841 |
| SVEELLEAELLK                   | 1373.6             | 2            | 3.9505 | 0.2445 |
| SVEELLEAELLKVANKEK             | 2043.3             | 3            | 3.2541 | 0.1649 |
| SVEEPTQPGGTGLSDSR              | 1717.8             | 2            | 4.5117 | 0.4436 |
| SVEHDKASK                      | 1001.1             | 2            | 2.561  | 0.178  |
| SVEITTDNILEGR                  | 1447.6             | 2            | 2.6175 | 0.2624 |
| SVELDNDGGGSAQK                 | 1563.6             | 2            | 4.9624 | 0.337  |
| SVEMHHEALSEVLPGDNVGFNVK        | 2509.8             | 2            | 3.6906 | 0.1248 |
| SVENLATATTTTSLAQLLGK           | 2133.4             | 2            | 3.2104 | 0.1583 |
| SVETDSSTVEHVR                  | 1446.5             | 2            | 2.6377 | 0.2843 |
| SVETLKEMIK                     | 1178.4             | 2            | 3.4454 | 0.1664 |
| SVETLKEMIKSGMNVAR              | 1894.3             | 2            | 4.9137 | 0.4576 |

| Peptide Sequence                     | Peptide mass (m/z) | Charge State | Xcorr  | DelCn2 |
|--------------------------------------|--------------------|--------------|--------|--------|
| SVEVNFTESLLR                         | 1394.6             | 2            | 3.5107 | 0.4075 |
| SVEVQGETETIIATK                      | 1605.8             | 2            | 3.627  | 0.3329 |
| SVFALTNGIYPHK                        | 1447.7             | 2            | 3.4496 | 0.346  |
| SVFALTNGIYPHKLVF                     | 1807.1             | 2            | 3.6615 | 0.4095 |
| SVFDIPIFTEEFLNHSK                    | 2024.3             | 2            | 3.5082 | 0.3034 |
| SVFGGLVNYFK                          | 1231.4             | 2            | 3.4316 | 0.3485 |
| SVFILGASGETGR                        | 1294.4             | 2            | 3.4934 | 0.2928 |
| SVFKPFIFGVGVAQAPQVLSPTFGAQDPVR       | 3161.6             | 3            | 6.8856 | 0.508  |
| SVFKPFIFVPHISQLLDTSSPTFELEDLVK       | 3436.0             | 3            | 4.9906 | 0.394  |
| SVFVGNIPYEATEEQDKDIFSEVGPVVSFR       | 3358.7             | 3            | 3.7449 | 0.2889 |
| SVGATNMNEHSSR                        | 1390.5             | 2            | 3.2787 | 0.357  |
| SVGDGETVEFDVVEGEK                    | 1796.9             | 2            | 5.0964 | 0.4753 |
| SVGDGETVEFDVVEGEKGAEEANVTGPDGVPVEGSR | 3561.7             | 3            | 4.6155 | 0.4134 |
| SVGDGETVEFDVVEGEKGAEEANVTGPGGVPVQGSK | 3474.7             | 3            | 4.9488 | 0.2563 |
| SVGELPSTVESLQK                       | 1474.6             | 2            | 4.2928 | 0.3682 |
| SVGELPSTVESLQKVQEQVHTLLSQDQAQAAR     | 3478.8             | 3            | 7.4197 | 0.5179 |
| SVGGSGGGSFGDNLVTR                    | 1567.6             | 2            | 4.5993 | 0.4259 |
| SVGGSGGGSFGDNLVTRS                   | 1654.7             | 2            | 4.7666 | 0.4049 |
| SVGMIAGGTGITPMLQVIR                  | 1902.3             | 2            | 5.272  | 0.4142 |
| SVGNTIDPVILFQK                       | 1531.8             | 2            | 3.6202 | 0.3475 |
| SVGPDFGKK                            | 935.1              | 2            | 2.4414 | 0.1023 |
| SVGRDEREDITHTYK                      | 1806.9             | 2            | 2.5654 | 0.2236 |
| SVGRDEREDITHTYKYPEGSSEER             | 2841.9             | 3            | 5.2696 | 0.3012 |
| SVGRDEREDITHTYKYPEGSSEEREAFTK        | 3446.6             | 3            | 3.8283 | 0.2737 |
| SVGYKPDFVGFVDFVDFVGYALDYNEYFR        | 3536.9             | 3            | 3.7716 | 0.2091 |
| SVGYPHPDWIWR                         | 1513.7             | 2            | 2.8525 | 0.2163 |
| SVHELEK                              | 841.9              | 1            | 1.9003 | 0.1195 |
| SVHFPGQAVGTR                         | 1256.4             | 2            | 2.4833 | 0.2393 |
| SVHKVEPITK                           | 1138.3             | 2            | 3.0881 | 0.3114 |
| SVHNGAPAPVSGEKDVVFLLDGSEGVR          | 2738.0             | 3            | 5.3199 | 0.5278 |
| SVHPYEAIEVIALPVEQGNFPYLQWVR          | 3142.6             | 3            | 6.7258 | 0.4194 |
| SVHSFAADSEELKQK                      | 1676.8             | 2            | 5.2434 | 0.3861 |
| SVHSLISDFKDPPTAK                     | 1743.0             | 2            | 4.1459 | 0.4687 |
| SVIDYQTHFR                           | 1266.4             | 2            | 2.8673 | 0.2585 |
| SVIEICQEVIKQSNVQILVPPAR              | 2565.0             | 3            | 3.2385 | 0.1393 |
| SVIEQGGIQTVDQLIK                     | 1729.0             | 2            | 4.8836 | 0.3887 |



| Peptide Sequence                          | Peptide mass (m/z) | Charge State | Xcorr  | DelCn2 |
|-------------------------------------------|--------------------|--------------|--------|--------|
| SVIEQGGIQTVDQLIKELPELLQR                  | 2708.1             | 3            | 5.4979 | 0.4055 |
| SVIGHLQTKGS                               | 1127.3             | 2            | 2.5984 | 0.2155 |
| SVINLLFAAYTGDVSALR                        | 1911.2             | 2            | 4.3782 | 0.3964 |
| SVISHSVTSDMQTIEQESPIMAKPR                 | 2773.1             | 3            | 6.0473 | 0.4592 |
| SVKDLVILLYETALLSSGFSLEDPQTHANR            | 3318.7             | 3            | 3.2963 | 0.2356 |
| SVKEAEDNIREMLMAR                          | 1893.2             | 2            | 2.8165 | 0.2463 |
| SVKEDSNLTLQEK                             | 1491.6             | 2            | 3.9528 | 0.2852 |
| SVKEDSNLTLQEKK                            | 1619.8             | 3            | 3.7629 | 0.1494 |
| SVKEYVDPNNIFGNR                           | 1752.9             | 2            | 3.6291 | 0.3173 |
| SVKGLVAVITGGASGLGLATAER                   | 2128.5             | 2            | 6.4924 | 0.5306 |
| SVKKPAPPPAPPQATK                          | 1614.9             | 2            | 2.4822 | 0.1581 |
| SVKNQAHSVLKKTLDQDQTLVQIFK                 | 2755.2             | 3            | 3.7503 | 0.1552 |
| SVLAETEGILQK                              | 1288.5             | 2            | 3.8478 | 0.3317 |
| SVLALTHEGR                                | 1083.2             | 2            | 3.0794 | 0.2672 |
| SVLAVENLLTLDR                             | 1443.7             | 2            | 3.8741 | 0.2043 |
| SVLDKTKHVSVMITLDPGMAPYIK                  | 2863.3             | 3            | 3.9448 | 0.2866 |
| SVLEDMEDSVLAVMPPDIAAEAQALRR               | 2928.3             | 3            | 4.2873 | 0.3124 |
| SVLEKTSVSEK                               | 1207.4             | 2            | 2.7636 | 0.1748 |
| SVLELIPELNEKEEAYNSLMK                     | 2450.8             | 2            | 3.4397 | 0.1456 |
| SVLGEADQKGSVLVAPDRLR                      | 2012.3             | 2            | 3.4885 | 0.1345 |
| SVLGQLGITK                                | 1016.2             | 2            | 3.449  | 0.3402 |
| SVLLCGIEAQACILNTTLDLLDR                   | 2475.9             | 2            | 3.7974 | 0.1315 |
| SVLLLAYKPMEGNFEEIAR                       | 2181.5             | 3            | 4.1925 | 0.349  |
| SVLNKESHSPFGLDSFNSTAK                     | 2266.5             | 3            | 3.9195 | 0.1639 |
| SVLRPAVLQAPQPK                            | 1504.8             | 2            | 3.1766 | 0.2186 |
| SVLTGGLDALEFIGK                           | 1520.8             | 2            | 3.8071 | 0.3135 |
| SVLVDFLIGSGLK                             | 1348.6             | 2            | 3.8626 | 0.3876 |
| SVLWWLPVEK                                | 1257.5             | 2            | 2.8717 | 0.1262 |
| SVMLYAAEMIPK                              | 1353.7             | 2            | 3.0588 | 0.1826 |
| SVMTEEYKVPDGMVGFIIGR                      | 2229.6             | 2            | 5.3116 | 0.5038 |
| SVNDQPSGNLPLFKPDDIQYFDKLLVDVDESTLSPEEQKER | 4708.1             | 3            | 4.611  | 0.3006 |
| SVNESLNNLFITEEDYQALR                      | 2356.5             | 2            | 6.3035 | 0.5148 |
| SVNEVMEWMNNVMNAQAK                        | 2096.4             | 2            | 3.4942 | 0.1502 |
| SVNFSLTPNEIK                              | 1349.5             | 2            | 2.8827 | 0.2157 |
| SVNGLAFYDWDNTELIR                         | 2014.2             | 2            | 4.597  | 0.4534 |
| SVNGQIESLISPDGSR                          | 1659.8             | 2            | 3.7379 | 0.2164 |

| Peptide Sequence                    | Peptide mass (m/z) | Charge State | Xcorr  | DelCn2 |
|-------------------------------------|--------------------|--------------|--------|--------|
| SVNPYLQGQR                          | 1162.3             | 2            | 2.9262 | 0.1713 |
| SVNSAGLHTVQR                        | 1269.4             | 2            | 3.4306 | 0.2609 |
| SVNVKPLVTHR                         | 1250.5             | 2            | 3.0691 | 0.2602 |
| SVPEVDPAAATMPR                      | 1370.6             | 2            | 2.5976 | 0.1574 |
| SVPHFSDEDEKDPE                      | 1502.5             | 2            | 3.6871 | 0.3138 |
| SVPLATAPMAEQR                       | 1371.6             | 2            | 3.517  | 0.4119 |
| SVPLATAPMAEQRTESTPITAVKQPEK         | 2882.3             | 3            | 3.9703 | 0.2072 |
| SVPRGEAAGAVQELAR                    | 1611.8             | 2            | 4.2751 | 0.3549 |
| SVPTSTVFYPSDGVATEK                  | 1886.0             | 2            | 4.5541 | 0.5186 |
| SVPTSTVFYPSDGVATEKAVELAANTK         | 2784.1             | 2            | 3.818  | 0.3317 |
| SVPTWLKLTSDDVKEQIYK                 | 2251.6             | 2            | 4.4363 | 0.4521 |
| SVPVSAGGEGETSPYSLEASPLGQLMNMLSHPVIR | 3613.1             | 3            | 5.3784 | 0.5128 |
| SVQALIKDFQGTPTFTYK                  | 2045.3             | 2            | 3.9187 | 0.3875 |
| SVQATTENKELK                        | 1348.5             | 2            | 3.581  | 0.2445 |
| SVQLAIEITTSQEAQAAKHEAQRLEQEAR       | 3223.5             | 3            | 4.0289 | 0.3048 |
| SVQNHNNKSVNESLNNLFITEEDYQALR        | 3278.5             | 3            | 5.5084 | 0.4736 |
| SVQPQSHKPQPTR                       | 1490.6             | 2            | 2.8461 | 0.2181 |
| SVQSHKDLILQCLDDKDESIR               | 2443.7             | 3            | 3.9565 | 0.2259 |
| SVQTFADK                            | 896.0              | 1            | 2.2289 | 0.2128 |
| SVQTFADKSKQEALKNDLVEALK             | 2563.9             | 3            | 6.0543 | 0.4506 |
| SVQTFADKSKQEALKNDLVEALKR            | 2720.1             | 3            | 6.6682 | 0.4603 |
| SVQTFADKSKQEALKNDLVEALKRK           | 2848.2             | 3            | 4.1976 | 0.1513 |
| SVQTTLQTDEVK                        | 1349.5             | 2            | 3.1243 | 0.2725 |
| SVREFLEKNYTDIAIETDDLTIK             | 2731.0             | 3            | 3.4542 | 0.2724 |
| SVRPNLQDKR                          | 1213.4             | 3            | 3.8022 | 0.2506 |
| SVSDDSEKNMISK                       | 1440.6             | 2            | 3.4291 | 0.3116 |
| SVSDNIRKYEMFAQTLQQSR                | 2517.8             | 3            | 4.4801 | 0.3144 |
| SVSDYDYGK                           | 870.9              | 1            | 1.9559 | 0.1922 |
| SVSDYDYGKLSNFK                      | 1460.6             | 2            | 3.5099 | 0.3378 |
| SVSHGSNHTQKPDEQR                    | 1807.9             | 2            | 4.3365 | 0.293  |
| SVSHQTVQQLVLEKEQALADLNSVEK          | 2895.2             | 3            | 5.8985 | 0.4746 |
| SVSLTGAPESVQK                       | 1303.4             | 2            | 3.66   | 0.2632 |
| SVSQGFCFNILCVGETGLGK                | 2060.4             | 2            | 2.8275 | 0.1066 |
| SVSSNVASVSPIPAGSK                   | 1587.8             | 2            | 4.7255 | 0.4128 |
| SVSTPSEAGSQDSGDGAVGSR               | 1951.9             | 2            | 4.6971 | 0.4858 |
| SVSTPSEAGSQDSGDLGPLTR               | 2062.1             | 2            | 4.2653 | 0.3704 |

| Peptide Sequence                  | Peptide mass (m/z) | Charge State | Xcorr  | DelCn2 |
|-----------------------------------|--------------------|--------------|--------|--------|
| SVSYPSLLSHITSSLMNHPVIPMANK        | 2825.3             | 3            | 3.2596 | 0.2521 |
| SVTDSIRDEYAFLQK                   | 1772.9             | 3            | 3.3157 | 0.1608 |
| SVTEQGAELSNEER                    | 1549.6             | 2            | 5.4914 | 0.3748 |
| SVTEQGAELSNEERNLLSVAYK            | 2438.6             | 2            | 4.2715 | 0.3575 |
| SVTEQGAELSNEERNLLSVAYKNVVGAR      | 3035.3             | 3            | 6.1549 | 0.3472 |
| SVTGTDVDFVFSK                     | 1368.5             | 2            | 3.0593 | 0.3408 |
| SVTHFDSLAVIDIPGADTLDKLFDHAVSK     | 3113.5             | 3            | 5.5565 | 0.2871 |
| SVTLEDGKTFIPQGNNAYVFPGVALGVIAGGIR | 3419.9             | 3            | 4.6847 | 0.378  |
| SVTLKDLVALPIIENYKDR               | 2303.6             | 3            | 4.4711 | 0.2622 |
| SVTNEDVTQEELGGAK                  | 1677.7             | 2            | 4.8036 | 0.3228 |
| SVTTKKPPLAQKPSVAPR                | 1906.3             | 3            | 4.4537 | 0.3794 |
| SVTVVEDDEDEDGDDLLHHHHVSGS         | 2744.7             | 2            | 4.8078 | 0.4747 |
| SVTVVEDDEDEDGDDLLHHHHVSGSR        | 2900.9             | 3            | 5.5609 | 0.4638 |
| SVVEFLQGYIGVPHGGFPEPFR            | 2433.7             | 2            | 4.3922 | 0.5044 |
| SVVLMSHLGRPDGVPMPDK               | 2036.4             | 2            | 4.1623 | 0.2917 |
| SVVLMSHLGRPDGVPMPDKYSLEPVAVELK    | 3265.8             | 3            | 6.9399 | 0.4255 |
| SVVPGGGAVEAALSIIYENYATSMGSR       | 2701.0             | 2            | 3.5708 | 0.3772 |
| SVVSGSINTVLGSR                    | 1376.5             | 2            | 3.5535 | 0.2635 |
| SVVTGGVQSVMGSR                    | 1364.6             | 2            | 3.7828 | 0.376  |
| SVYDDQPNAHKK                      | 1402.5             | 2            | 2.4614 | 0.1032 |
| SVYENDVLEQLKQALYGDKKPR            | 2594.9             | 3            | 4.1787 | 0.4067 |
| SVYGGEFIQQLK                      | 1369.5             | 2            | 3.4672 | 0.2872 |
| SWDIFFR                           | 971.1              | 2            | 2.4303 | 0.2046 |
| SWDTGSPSSANAGYCASLTSCSGFK         | 2485.6             | 3            | 3.2835 | 0.1069 |
| SWDTGSPSSANAGYCASLTSCSGFKK        | 2613.8             | 3            | 4.0592 | 0.3023 |
| SWEQKLEEMR                        | 1336.5             | 2            | 2.5022 | 0.2068 |
| SWGIGAPSSVNPGYCVSLTSSTGFQK        | 2631.9             | 3            | 5.3781 | 0.4275 |
| SWHDIEKDNR                        | 1371.4             | 2            | 2.6737 | 0.1989 |
| SWHDVQVSSAYKK                     | 1535.7             | 2            | 2.4587 | 0.273  |
| SWHDVQVSSAYVK                     | 1506.6             | 2            | 3.7921 | 0.4021 |
| SWMHTAGVVDANTAAQSGVGLAR           | 2300.5             | 3            | 3.3495 | 0.1741 |
| SWNETLTSR                         | 1094.2             | 2            | 2.8255 | 0.2386 |
| SWPFNLEEIKDLLPEMR                 | 2118.4             | 2            | 3.4306 | 0.2699 |
| SWSHYTVPAGMTVIQWVSDFSER           | 2685.0             | 3            | 3.6252 | 0.1621 |
| SWTAADMAAQTTK                     | 1382.5             | 2            | 4.4099 | 0.3933 |
| SWTAADTAAQITQR                    | 1520.6             | 3            | 4.3557 | 0.2532 |

| Peptide Sequence                  | Peptide mass (m/z) | Charge State | Xcorr  | DelCn2 |
|-----------------------------------|--------------------|--------------|--------|--------|
| SWVNQMESQTGEASKLPYDVTPEQALAHHEEVK | 3603.9             | 3            | 6.6952 | 0.4773 |
| SYAEIIFGKCGRIGQR                  | 1799.1             | 2            | 2.8502 | 0.1496 |
| SYAVSSSVLHGIEPR                   | 1602.8             | 2            | 3.8298 | 0.4557 |
| SYAVVGVPDIMGIGPAYAIPVALQK         | 2628.1             | 3            | 3.5548 | 0.1649 |
| SYCAEIAHNVSSK                     | 1409.6             | 2            | 2.5372 | 0.15   |
| SYDFFRHDNEEAMKIR                  | 2059.3             | 3            | 3.5748 | 0.3015 |
| SYDQVHSGK                         | 1021.1             | 2            | 2.4384 | 0.1896 |
| SYDSLHRPK                         | 1103.2             | 2            | 2.8013 | 0.2313 |
| SYDVPPPPMEPDHPFYSNISK             | 2418.7             | 2            | 4.1168 | 0.3776 |
| SYDYDLIIIGGGSGGLAAAK              | 1942.2             | 2            | 3.8303 | 0.3095 |
| SYEALVQHVIEDHER                   | 1826.0             | 3            | 3.6319 | 0.4644 |
| SYEAQDPEIASLSGK                   | 1595.7             | 2            | 4.2129 | 0.3449 |
| SYEAYVLNIVR                       | 1327.5             | 2            | 3.7199 | 0.3036 |
| SYEKEKASLPGVKK                    | 1564.8             | 2            | 2.985  | 0.1455 |
| SYELAGGDLAGLLEALSMDGLEEGVR        | 2666.9             | 2            | 5.0916 | 0.4601 |
| SYELPDGQVITIGNER                  | 1791.9             | 3            | 4.9494 | 0.4761 |
| SYELPDGQVITIGNERFR                | 2095.3             | 2            | 3.0013 | 0.2192 |
| SYETLVDFDNHLDDIRNDWTNPEINK        | 3165.3             | 3            | 3.4578 | 0.1445 |
| SYFSEEGIGYNIIR                    | 1648.8             | 2            | 4.1341 | 0.1185 |
| SYFSSFTDDIISQPMLK                 | 1980.2             | 2            | 3.5602 | 0.2883 |
| SYGPAPGAGHVQEESENLSLQALESR        | 2598.8             | 3            | 5.49   | 0.4171 |
| SYGPAPGAGHVQEESENLSLQALESRQDDILKR | 3467.7             | 3            | 3.8961 | 0.2512 |
| SYHEEFNPPKEPMKDDITGEPLIR          | 2844.1             | 3            | 5.9355 | 0.4326 |
| SYHEEFNPPKEPMKDDITGEPLIRR         | 3000.3             | 3            | 5.2224 | 0.4072 |
| SYIQSLPQTPR                       | 1290.5             | 2            | 3.1392 | 0.2008 |
| SYIYSGSHDGHINYWDSETGENDSFAGK      | 3138.2             | 3            | 6.0499 | 0.4974 |
| SYKVSTSGPR                        | 1082.2             | 2            | 2.5604 | 0.3335 |
| SYLEKQDFDQMLQEIQEVKTPEELETFMLK    | 3692.2             | 3            | 4.0875 | 0.2022 |
| SYLENPAFMLLDLK                    | 1655.0             | 2            | 5.0931 | 0.4344 |
| SYLFNIMDTPGHVNFSDDEVTAGLR         | 2685.0             | 3            | 4.1283 | 0.3652 |
| SYLNMDAIMEAIKK                    | 1628.0             | 2            | 3.6082 | 0.4446 |
| SYLTEQVNQDLPK                     | 1535.7             | 2            | 3.7942 | 0.3508 |
| SYLTEQVNQDLPKEVLAELEALER          | 2789.1             | 3            | 6.5152 | 0.5531 |
| SYLTEQVNQDLPKEVLAELEALERR         | 2945.3             | 3            | 4.9653 | 0.3265 |
| SYLTPVRDEESESQR                   | 1796.9             | 2            | 3.2125 | 0.2191 |
| SYLYFTQFK                         | 1197.4             | 2            | 2.7538 | 0.2602 |

| Peptide Sequence                      | Peptide mass (m/z) | Charge State | Xcorr  | DelCn2 |
|---------------------------------------|--------------------|--------------|--------|--------|
| SYLYQLQQEAPHPR                        | 1730.9             | 2            | 2.4601 | 0.1776 |
| SYNDELQFLEK                           | 1386.5             | 2            | 3.907  | 0.292  |
| SYNDELQFLEKINK                        | 1741.9             | 2            | 3.7174 | 0.1669 |
| SYPGSQLDILIDQGKDDQFLLDGQLLPDNFIAACTEK | 4083.5             | 3            | 5.2262 | 0.3675 |
| SYQDPSNAQFLESIR                       | 1755.9             | 2            | 4.9784 | 0.4312 |
| SYQEELDKLR                            | 1281.4             | 2            | 2.5489 | 0.1299 |
| SYQFGIIGNDR                           | 1270.4             | 2            | 3.5315 | 0.3069 |
| SYQFWDTQPVPK                          | 1496.6             | 2            | 3.7574 | 0.3247 |
| SYREHIEQQIQTYQR                       | 1980.1             | 3            | 4.0967 | 0.2161 |
| SYSFDEIRK                             | 1145.2             | 2            | 2.6899 | 0.2879 |
| SYSFHQSQHR                            | 1277.3             | 2            | 2.6871 | 0.306  |
| SYSMIVNNLLKPISVEGSSK                  | 2167.5             | 2            | 2.9895 | 0.3779 |
| SYSPYDMLESIR                          | 1461.6             | 2            | 3.7222 | 0.4387 |
| SYSPYDMLESIRK                         | 1589.8             | 2            | 3.2258 | 0.3365 |
| SYSSGGEDGYVR                          | 1277.3             | 2            | 3.2876 | 0.2861 |
| SYSSTLTDMGR                           | 1218.3             | 2            | 2.9954 | 0.3231 |
| SYSVEKSPQDEGLHLLKPLSIPK               | 2566.9             | 3            | 3.6078 | 0.1121 |
| SYSVGASGSSSR                          | 1145.2             | 2            | 2.6145 | 0.2445 |
| SYTITGLQPGETDYK                       | 1544.7             | 2            | 3.473  | 0.3493 |
| SYVDPSTDER                            | 1169.2             | 2            | 2.4233 | 0.2211 |
| SYVKLPSASAQS                          | 1238.4             | 2            | 3.1426 | 0.2833 |
| SYVSEKDV TSAK                         | 1314.4             | 2            | 2.9897 | 0.3278 |
| SYVTTSTR                              | 915.0              | 2            | 2.4297 | 0.1893 |
| SYVYAEENIDIHNFVGTFTFR                 | 2473.7             | 3            | 3.6243 | 0.2502 |
| TAAAAAEHSQR                           | 1113.2             | 2            | 2.9768 | 0.1659 |
| TAAAAAEHSQRELDVTLEDIKEHVK             | 2864.1             | 3            | 6.4568 | 0.3555 |
| TAAALAPASLTSAR                        | 1301.5             | 2            | 3.3168 | 0.2727 |
| TAAANAAAGAAENAFR                      | 1477.6             | 2            | 3.6468 | 0.2924 |
| TAAANAAAGAAENAFRAP                    | 1645.8             | 2            | 4.2085 | 0.3125 |
| TAAAVAAQSGILDR                        | 1344.5             | 2            | 4.6144 | 0.4474 |
| TAADELEAFLGGGAPGGR                    | 1689.8             | 2            | 3.8547 | 0.3877 |
| TAADV VSPGANSVDSR                     | 1546.6             | 2            | 3.4159 | 0.275  |
| TAAESFK                               | 753.8              | 1            | 1.6491 | 0.1499 |
| TAAFLLPILSQIYSDGPGGEALR               | 2333.7             | 3            | 6.4629 | 0.5451 |
| TAAFLLPILSQIYTDGPGGEALK               | 2319.7             | 3            | 5.9188 | 0.4558 |
| TAAGLMHTFNAHAATDITGFGILGHAQNLAK       | 3151.5             | 3            | 7.4634 | 0.4635 |

| Peptide Sequence                   | Peptide mass (m/z) | Charge State | Xcorr  | DelCn2 |
|------------------------------------|--------------------|--------------|--------|--------|
| TAAGLMHTFNAHAATDITGFGILGHSQNLAK    | 3167.5             | 3            | 4.9502 | 0.3196 |
| TAAKGEAAAERPGEAAVASSPSK            | 2157.3             | 3            | 6.3428 | 0.4678 |
| TAAKGEAAAERPGEAAVASSPSKANGQENGHVK  | 3192.4             | 3            | 4.6235 | 0.2316 |
| TAAMLSSAESFSK                      | 1330.5             | 2            | 4.2784 | 0.3816 |
| TAASGAAGDKDTK                      | 1193.2             | 2            | 3.1016 | 0.3949 |
| TAASGIPYHSEVPVSLKEAVCEVALDYKK      | 3106.5             | 3            | 3.216  | 0.2114 |
| TAASGVEANSRPLDHAQPPSSLVIDKESEVYK   | 3397.7             | 3            | 6.3036 | 0.3551 |
| TAATLATHLR                         | 1184.3             | 2            | 3.1182 | 0.2821 |
| TAAVANSMNYLTK                      | 1384.6             | 2            | 4.6795 | 0.4323 |
| TAAYGHFGR                          | 980.1              | 2            | 2.6399 | 0.3744 |
| TAAYVNAIEK                         | 1080.2             | 2            | 3.2761 | 0.2368 |
| TAAYVNAIEKVK                       | 1454.7             | 2            | 4.1056 | 0.3579 |
| TADDGCLENTPDTAEFSSR                | 1943.0             | 2            | 5.4673 | 0.4672 |
| TADDPSSLIK                         | 1160.3             | 2            | 3.0306 | 0.2449 |
| TADGIVSHLK                         | 1041.2             | 2            | 3.1547 | 0.3333 |
| TADGIVSHLKK                        | 1169.4             | 2            | 3.4614 | 0.3414 |
| TADKHKDVIINQEGEYIK                 | 2102.3             | 2            | 4.7489 | 0.4494 |
| TADLAPHPEEK                        | 1208.3             | 2            | 2.6415 | 0.2049 |
| TADMVGGQIGFHR                      | 1447.6             | 2            | 3.4501 | 0.4187 |
| TADRQYMEGFNDELEAFKER               | 2450.6             | 3            | 4.7286 | 0.3448 |
| TAEDAKDFFK                         | 1172.3             | 2            | 2.4064 | 0.1193 |
| TAEDYQALNKDIEAQLQHAGLR             | 2485.7             | 3            | 3.9051 | 0.2294 |
| TAEELMNFSKGEENLMDAQVK              | 2385.7             | 3            | 5.4305 | 0.4055 |
| TAEFAPFVVFIAAPTITPGLNEDESLQR       | 3035.4             | 3            | 4.9968 | 0.4262 |
| TAEFQVAR                           | 922.0              | 2            | 2.7708 | 0.2762 |
| TAEFVPYVVFIEAPDFETLR               | 2344.6             | 3            | 3.8205 | 0.1764 |
| TAEGQALSEAR                        | 1133.2             | 2            | 3.4006 | 0.1876 |
| TAEHEAAQQLQSK                      | 1556.6             | 2            | 4.6615 | 0.3572 |
| TAEHFQEAMEESK                      | 1537.6             | 2            | 3.9696 | 0.393  |
| TAEHFQEAMEESKTHFR                  | 2079.2             | 2            | 4.9986 | 0.4559 |
| TAEKTDKEEEGKVEVKDQQSK              | 2407.6             | 3            | 3.8402 | 0.2037 |
| TAELLSHHQVEIKQEFPR                 | 2163.4             | 3            | 3.8864 | 0.3066 |
| TAELSPFIVFIAPTDQGTQTEALQQLQK       | 3076.4             | 2            | 2.6282 | 0.1063 |
| TAELSPFIVFIAPTDQGTQTEALQQLQKDSEAIR | 3748.1             | 3            | 3.7238 | 0.2879 |
| TAENATSGETLEENEAGD                 | 1838.8             | 2            | 5.2941 | 0.4862 |
| TAEVLANK                           | 846.0              | 2            | 2.6112 | 0.2065 |

| Peptide Sequence                       | Peptide mass (m/z) | Charge State | Xcorr  | DelCn2 |
|----------------------------------------|--------------------|--------------|--------|--------|
| TAFDDAIAELDTLNEDSYK                    | 2132.2             | 2            | 5.4758 | 0.5015 |
| TAFDDAIAELDTLNEDSYKDSTLIMQLLR          | 3303.6             | 3            | 6.3819 | 0.5062 |
| TAFDEAIAELDTLNEDSYK                    | 2146.3             | 2            | 5.3251 | 0.5198 |
| TAFDEAIAELDTLNEDSYKDSTLIMQLLR          | 3317.7             | 3            | 4.0644 | 0.2869 |
| TAFDEAIAELDTLNEDSYK                    | 2160.3             | 2            | 5.4833 | 0.4924 |
| TAFDEAIAELDTLNEDSYKDSTLIMQLLR          | 3331.7             | 3            | 6.5301 | 0.5946 |
| TAFDEAIAELDTLSEESYK                    | 2133.3             | 2            | 5.74   | 0.5094 |
| TAFDEAIAELDTLSEESYKDSTLIMQLLR          | 3304.7             | 3            | 6.2892 | 0.5441 |
| TAFHQEQGHQLLK                          | 1537.7             | 2            | 4.2035 | 0.3331 |
| TAFHQEQGHQLLKK                         | 1665.9             | 2            | 4.2329 | 0.2877 |
| TAFPSLPDTHDKTDNTGTLPELVAFR             | 2962.1             | 3            | 3.2663 | 0.2975 |
| TAGDHPGR                               | 810.8              | 2            | 2.4262 | 0.173  |
| TAGPLESSETEEASQLK                      | 1777.9             | 2            | 3.5542 | 0.3496 |
| TAGPLESSETEEASQLKER                    | 2063.2             | 2            | 5.5604 | 0.435  |
| TAGVKVETTEDLVAK                        | 1561.8             | 2            | 4      | 0.3456 |
| TAGYPNVNIHNFTTSWR                      | 1979.1             | 2            | 3.2758 | 0.3921 |
| TAGYYPNPPLVLSSDETLISK                  | 2266.5             | 3            | 5.7498 | 0.316  |
| TAHETDKSEGGK                           | 1260.3             | 2            | 3.3774 | 0.4232 |
| TAHETDKSEGGKR                          | 1416.5             | 2            | 3.3851 | 0.4062 |
| TAHSSLALFRDDTGK                        | 1718.9             | 2            | 4.9019 | 0.3983 |
| TAHYGMLFDEYQGLSHLEALEILSNESESK         | 3413.7             | 3            | 3.5674 | 0.2086 |
| TAIGALKNIGDLQVTKETIEDVEEMLNNLPGVTSVHSR | 4207.8             | 3            | 5.4487 | 0.3712 |
| TAIKEQLDSSNSTIAILQTEKDKLELEITDSK       | 3563.9             | 3            | 4.8768 | 0.3344 |
| TAIKEQLDSSNSTIAILQTEKDKLELEITDSKK      | 3692.1             | 3            | 5.29   | 0.3003 |
| TAKDVVENGETADQTLSLMEQLRGEALK           | 3048.4             | 3            | 5.6062 | 0.4121 |
| TAKEQGIHSLEVLITR                       | 1796.1             | 2            | 3.3112 | 0.3867 |
| TALAEAELEYNPEHVSR                      | 1930.1             | 2            | 5.3108 | 0.5122 |
| TALALAIQELGSK                          | 1386.6             | 2            | 3.714  | 0.1925 |
| TALAMGADR                              | 906.0              | 2            | 2.5298 | 0.2037 |
| TALAMGADRGIVVEVPPAEAR                  | 2291.6             | 3            | 3.7145 | 0.188  |
| TALDAFGR                               | 850.9              | 2            | 2.8811 | 0.2296 |
| TALDKIEEMEMTNSHLAK                     | 2062.4             | 3            | 4.1898 | 0.1262 |
| TALFEEISR                              | 1066.2             | 2            | 2.8963 | 0.2289 |
| TALGVAELTVTDLFR                        | 1606.8             | 2            | 4.4612 | 0.4507 |
| TALHLATEMEELGLVTHLVTK                  | 2307.7             | 3            | 4.6313 | 0.2772 |
| TALHVAEAEGHVEVVK                       | 1631.9             | 2            | 5.1679 | 0.5005 |

| Peptide Sequence                                | Peptide mass (m/z) | Charge State | Xcorr  | DelCn2 |
|-------------------------------------------------|--------------------|--------------|--------|--------|
| TALIHDLGLAR                                     | 1067.2             | 1            | 2.5992 | 0.3326 |
| TALINSTGEEVAMR                                  | 1492.7             | 2            | 4.121  | 0.4185 |
| TALINSTGEEVAMRK                                 | 1620.9             | 2            | 3.9975 | 0.3582 |
| TALLDAAGVASLLTTAEVVVTEIPK                       | 2483.9             | 2            | 2.5904 | 0.2824 |
| TALLDAAGVASLLTTAEVVVTEIPKEEK                    | 2870.3             | 3            | 5.3541 | 0.4346 |
| TALLDAAGVASLLTTAEVVVTEIPKEEKDPGMGAMGGMGGGMGGGM  | 4380.1             | 3            | 5.5958 | 0.3795 |
| TALLDAAGVASLLTTAEVVVTEIPKEEKDPGMGAMGGMGGGMGGGMF | 4527.2             | 3            | 5.6941 | 0.4459 |
| TALLPSDSVFAEER                                  | 1535.7             | 2            | 3.0462 | 0.1948 |
| TALPAAELGLYSLVLSGALAYAGR                        | 2378.8             | 2            | 3.8757 | 0.3252 |
| TALPAQSAATLPAR                                  | 1368.6             | 2            | 4.3806 | 0.4318 |
| TALPTSGSSAGELELLAGEVPAR                         | 2227.5             | 2            | 4.7068 | 0.3802 |
| TALPTSGSSAGELELLAGEVPARSPGAFDMSGVR              | 3332.7             | 3            | 3.4827 | 0.3247 |
| TALQEEIKSKVDQIQEIVTGNPTVIK                      | 2883.3             | 3            | 4.0366 | 0.23   |
| TALQKEITTR                                      | 1161.3             | 2            | 3.0261 | 0.3589 |
| TALTYYLDITNPPR                                  | 1638.8             | 2            | 4.436  | 0.3987 |
| TALVANTSNMPVAAR                                 | 1516.7             | 2            | 5.1162 | 0.4462 |
| TALVERDDFSSGTSSR                                | 1728.8             | 2            | 3.3743 | 0.1107 |
| TALYNYIFAK                                      | 1204.4             | 2            | 2.4741 | 0.1646 |
| TAMKYNLGLDLR                                    | 1395.7             | 3            | 4.216  | 0.2332 |
| TAMNVNDLFLAIK                                   | 1521.8             | 2            | 3.0525 | 0.1411 |
| TAMNVNEIFMAIAK                                  | 1553.9             | 2            | 4.6769 | 0.3868 |
| TAMSTPHVAEPAENEQDEQDENGAEASADLR                 | 3314.4             | 3            | 6.35   | 0.4177 |
| TANDAVELHIKNVQPSDQGHYK                          | 2465.7             | 3            | 3.5819 | 0.1376 |
| TANDMIHAENMR                                    | 1403.6             | 2            | 3.6842 | 0.344  |
| TANKDHLVTAYNHLFETK                              | 2103.3             | 2            | 5.6519 | 0.4424 |
| TANKDHLVTAYNHLFETKR                             | 2259.5             | 2            | 5.0449 | 0.482  |
| TANLYDVETSELVHSLTGHDQELTHCCTHPTQR               | 3738.0             | 3            | 4.4833 | 0.2716 |
| TAPAVVYIEILDRHPFLGR                             | 2168.5             | 2            | 3.4086 | 0.3845 |
| TAPFDSRFPNQQR                                   | 1779.9             | 2            | 3.2919 | 0.2778 |
| TAPSTNSSAPAVVGNPGVTEVSPEFLAALPPAIQEEVLAQQR      | 4245.7             | 3            | 4.2434 | 0.3179 |
| TAPTSTIAPGVVMASSPALPTQPAEEAAR                   | 2823.2             | 3            | 4.7639 | 0.3394 |
| TAPYVVTGSVDQTVK                                 | 1565.7             | 2            | 4.2999 | 0.3097 |
| TAQALSSGSGSQETK                                 | 1452.5             | 2            | 4.7673 | 0.4847 |
| TAQEKDSLITPHVSR                                 | 1682.9             | 2            | 4.1878 | 0.4018 |
| TAQNLSIFLGSFR                                   | 1454.7             | 2            | 3.3248 | 0.2651 |
| TAQSGALRDVSEELSR                                | 1719.8             | 3            | 3.4922 | 0.2727 |



| Peptide Sequence                         | Peptide mass (m/z) | Charge State | Xcorr  | DelCn2 |
|------------------------------------------|--------------------|--------------|--------|--------|
| TASDFITK                                 | 883.0              | 1            | 2.1535 | 0.1468 |
| TASDFITKMDYPK                            | 1517.7             | 2            | 3.1066 | 0.1691 |
| TASFESRADEVAPAKK                         | 1794.9             | 2            | 3.8259 | 0.2082 |
| TASGSSVTSLDGTR                           | 1339.4             | 2            | 3.5976 | 0.4159 |
| TASIKPEVALLDTQDMENMSDDDDGWEFVNLGDQQSFGIK | 4346.7             | 3            | 4.1575 | 0.2532 |
| TASNVEEAFINTAK                           | 1495.6             | 2            | 5.0163 | 0.4319 |
| TASNVEEAFINTAKEIYEK                      | 2158.4             | 2            | 4.8367 | 0.4626 |
| TASNVEEAFINTAKEIYEKIQEGVFDINNEANGIK      | 3901.2             | 3            | 4.2632 | 0.2771 |
| TASPNRAGKGVIEQTEK                        | 1787.0             | 2            | 2.901  | 0.2246 |
| TASTNNIAQAR                              | 1147.2             | 2            | 3.3601 | 0.3115 |
| TASTPTPPQTGGGLEPQANGETPQVAVIVRPDDR       | 3458.7             | 3            | 5.0112 | 0.4133 |
| TATADKKLQFSLK                            | 1566.8             | 2            | 3.7545 | 0.1817 |
| TATADKKLQFSLKK                           | 1695.0             | 2            | 4.4556 | 0.2849 |
| TATADKKLQSSLKK                           | 1634.9             | 2            | 4.3309 | 0.3528 |
| TATALLESPLSATVEDALQSFLK                  | 2406.7             | 2            | 4.2268 | 0.3979 |
| TATANGFQMVTSGVQSK                        | 1727.9             | 2            | 5.2601 | 0.4397 |
| TATEKPGPAEAAR                            | 1299.4             | 2            | 2.8935 | 0.2194 |
| TATESFASDPILYRPVAVALDTK                  | 2466.8             | 2            | 4.7759 | 0.4598 |
| TATESFASDPILYRPVAVALDTKGPEIR             | 3019.4             | 3            | 6.564  | 0.5646 |
| TATFAQALQFVPETQVSLLDNGLR                 | 2620.9             | 3            | 6.196  | 0.5034 |
| TATGLTHIIETR                             | 1313.5             | 2            | 2.8341 | 0.2308 |
| TATGLTHIIETRK                            | 1441.7             | 2            | 3.0575 | 0.2697 |
| TATLRHDADGQATLLNLLLR                     | 2193.5             | 2            | 3.7061 | 0.3504 |
| TATPEIVDNKDGTVTVR                        | 1817.0             | 2            | 3.8625 | 0.3968 |
| TATPQQAQEVHEK                            | 1467.6             | 2            | 3.9306 | 0.3373 |
| TATPQQAQEVHEKLR                          | 1736.9             | 2            | 4.8425 | 0.4663 |
| TATSLAEGLSLVVSPDSIHSVAPENEGR             | 2838.1             | 3            | 3.9613 | 0.2751 |
| TATVGGAMMGSTHIYDMSTVMSR                  | 2405.8             | 3            | 4.6195 | 0.4482 |
| TATVYPEPQNKEAFVR                         | 1851.1             | 2            | 3.247  | 0.3883 |
| TAVAHRPGAFK                              | 1155.3             | 2            | 3.2488 | 0.3458 |
| TAVAHRPGAFKAELSK                         | 1683.9             | 2            | 3.9653 | 0.3685 |
| TAVAPSAVNLADPR                           | 1382.5             | 2            | 3.2979 | 0.1877 |
| TAVDGPDLMLTGQER                          | 1732.9             | 2            | 4.1361 | 0.3628 |
| TAVDSLVAYSVK                             | 1253.4             | 2            | 3.2784 | 0.4051 |
| TAVDSLVAYSVKIETNENNLESAK                 | 2596.8             | 3            | 3.5506 | 0.2414 |
| TAVEHATDEDILAK                           | 1513.6             | 2            | 4.7791 | 0.4419 |

| Peptide Sequence                         | Peptide mass (m/z) | Charge State | Xcorr  | DelCn2 |
|------------------------------------------|--------------------|--------------|--------|--------|
| TAVETAVLLLR                              | 1186.4             | 2            | 3.996  | 0.2669 |
| TAVFGFETSEAK                             | 1287.4             | 2            | 2.6945 | 0.1392 |
| TAVFGFETSEAKGPDGMALPRPR                  | 2435.7             | 3            | 4.0658 | 0.2431 |
| TAVIDHHNYDISDLGQHTLIVADTENLLK            | 3247.6             | 3            | 7.0285 | 0.5081 |
| TAVIDHHNYDISDLGQHTLIVADTENLLKAPTIVGK     | 3914.4             | 3            | 6.435  | 0.5236 |
| TAVLDFIEDYLKR                            | 1583.8             | 2            | 4.0173 | 0.4057 |
| TAVPSPVEAAAASDPAAAR                      | 1752.9             | 2            | 3.3167 | 0.3688 |
| TAVSSELRTEVEENQK                         | 1820.9             | 2            | 4.1266 | 0.1117 |
| TAVSSELRTEVEENQKYFK                      | 2259.5             | 2            | 4.0682 | 0.2609 |
| TAVTTVPSMGIGLVK                          | 1474.8             | 2            | 3.7158 | 0.3286 |
| TAVVVGITDDVVR                            | 1346.5             | 2            | 2.9814 | 0.2156 |
| TAVVVGITDDVVRVQEVPK                      | 2027.3             | 2            | 4.475  | 0.2638 |
| TAVVVGITDDVVRVQEVPKLK                    | 2268.6             | 2            | 4.5243 | 0.2667 |
| TAYFSLDTR                                | 1074.2             | 2            | 2.8106 | 0.3284 |
| TAYGPNGMNK                               | 1053.2             | 2            | 2.6364 | 0.2513 |
| TCEEHQLCVVAVLPHILDTGAAGR                 | 2533.9             | 3            | 4.7727 | 0.2075 |
| TCFVDCLIEQTHPEIR                         | 1905.2             | 2            | 3.2403 | 0.1853 |
| TCVADESAENCDKSLHTLFGDK                   | 2384.6             | 3            | 3.6695 | 0.2402 |
| TCVADESAENCDKSLHTLFGDKLCTVATLR           | 3242.7             | 3            | 5.0849 | 0.3634 |
| TDAASKPFAEVR                             | 1292.4             | 2            | 2.8203 | 0.2415 |
| TDAAVEMKR                                | 1021.2             | 2            | 2.9177 | 0.2611 |
| TDADSESDNSDNNTIFVQGLGEGVSTDQVGEFFK       | 3624.7             | 3            | 6.3179 | 0.4956 |
| TDADSESDNSDNNTIFVQGLGEGVSTDQVGEFFKQIGIIK | 4277.5             | 3            | 6.3299 | 0.5619 |
| TDAGGEDAILQTR                            | 1347.4             | 2            | 3.2968 | 0.2692 |
| TDAISEEKLREIFGLYGQTTGK                   | 2457.7             | 3            | 4.3089 | 0.3877 |
| TDAPQPVDKEEEEEEEEEKDKGDEEEEGEEKLEEK      | 4135.2             | 3            | 4.8461 | 0.3791 |
| TDASSASSFLDSDELER                        | 1830.8             | 2            | 4.7843 | 0.1975 |
| TDASSASSFLDSDELERTGIDLGTTGR              | 2802.9             | 3            | 5.3921 | 0.4841 |
| TDAVDSVVR                                | 962.0              | 2            | 3.0714 | 0.1166 |
| TDDEVVQR                                 | 962.0              | 2            | 3.1622 | 0.1695 |
| TDDEVVQREEEAIQLDGLNASQIR                 | 2729.9             | 3            | 5.3509 | 0.3539 |
| TDDGCLENTPDTAEFR                         | 1871.9             | 2            | 5.0843 | 0.4254 |
| TDDYLDQPCLETVNR                          | 1782.9             | 2            | 4.5974 | 0.359  |
| TDDYLDQPCYETINR                          | 1847.0             | 2            | 3.9319 | 0.3679 |
| TDEEGKDVDPHAVLEMK                        | 1914.1             | 3            | 3.7096 | 0.3106 |
| TDEFQLHTNVNDGTEFGGSIYQK                  | 2601.7             | 3            | 4.7387 | 0.264  |

| Peptide Sequence                              | Peptide mass (m/z) | Charge State | Xcorr  | DelCn2 |
|-----------------------------------------------|--------------------|--------------|--------|--------|
| TDEGERKCGGPGCGGLVTVAHNAWQK                    | 2672.0             | 3            | 3.9132 | 0.1053 |
| TDEGIAYR                                      | 925.0              | 2            | 3.129  | 0.1697 |
| TDEKVDESGPPAPSKPR                             | 1810.9             | 3            | 4.1104 | 0.4496 |
| TDESGPHSHR                                    | 1123.1             | 2            | 2.5884 | 0.2942 |
| TDFKEEPEPGFKR                                 | 1580.7             | 2            | 2.9751 | 0.1617 |
| TDGALLVNAMFFKPHWDEK                           | 2220.5             | 3            | 3.9422 | 0.3108 |
| TDGKVFQFLNAK                                  | 1368.6             | 3            | 3.9693 | 0.3234 |
| TDGSQKTESSTEGKEQEEK                           | 2099.1             | 3            | 4.5316 | 0.3061 |
| TDIARTEYLSNADER                               | 1754.8             | 3            | 4.0702 | 0.2256 |
| TDIFGVEETAIGKK                                | 1508.7             | 2            | 2.4546 | 0.1291 |
| TDITYPAGFMDVISIDK                             | 1887.1             | 2            | 2.4129 | 0.1418 |
| TDITYPAGFMDVISIDKTGENFR                       | 2591.9             | 2            | 3.8353 | 0.3877 |
| TDKAEVVNGYEAK                                 | 1424.5             | 2            | 3.5458 | 0.3222 |
| TDKSSASAPDVDDPEAFPALA                         | 2105.2             | 2            | 4.3356 | 0.4164 |
| TDKTLVLLMGK                                   | 1219.5             | 3            | 3.8441 | 0.3544 |
| TDKTMTELEIDMNQR                               | 1826.0             | 2            | 3.6915 | 0.2867 |
| TDKVFEVMLATDR                                 | 1525.8             | 2            | 3.4304 | 0.2949 |
| TDLAAVPASR                                    | 1001.1             | 2            | 2.8029 | 0.1468 |
| TDLADKR                                       | 818.9              | 2            | 2.5884 | 0.1104 |
| TDLEKDIISDTSGDFR                              | 1812.9             | 2            | 4.6486 | 0.4314 |
| TDLEKDIISDTSGDFRK                             | 1941.1             | 3            | 5.8574 | 0.4739 |
| TDLEMQIEGLKEELAYLK                            | 2124.4             | 2            | 5.1381 | 0.3535 |
| TDLEMQIEGLKEELAYLKK                           | 2252.6             | 2            | 5.7378 | 0.4745 |
| TDLEMQIEGLKEELAYLKKNHEEEISTLR                 | 3461.9             | 3            | 6.3518 | 0.4684 |
| TDLEMQIEGLKEELAYLRK                           | 2280.6             | 3            | 5.1052 | 0.3897 |
| TDLKGDDLEEGVTSEEFDFLEER                       | 2802.9             | 3            | 4.9382 | 0.5308 |
| TDLKQGLNGVPILSEEELSLLEDFYK                    | 2952.3             | 3            | 3.9566 | 0.1174 |
| TDLLEPYNK                                     | 1206.4             | 2            | 3.3728 | 0.1773 |
| TDLNPDNLQGGDDLDPNYVLSSR                       | 2519.6             | 2            | 4.8921 | 0.4856 |
| TDMDQIITSK                                    | 1152.3             | 2            | 3.3798 | 0.2609 |
| TDMDQIITSKEHLASK                              | 1818.0             | 2            | 2.7931 | 0.2557 |
| TDMIQALGGVEGILEHTLFK                          | 2173.5             | 2            | 4.7537 | 0.4481 |
| TDNAGDQHGGGGGGGGGAGAAGGGGGGENYDDPHKTPASPVVHIR | 4041.1             | 3            | 4.8442 | 0.4435 |
| TDPHLCDFLETHFLDEEVK                           | 2289.5             | 2            | 4.5833 | 0.3943 |
| TDPSILGGMIVR                                  | 1259.5             | 2            | 3.2779 | 0.3218 |
| TDQAQKAEGAGDAK                                | 1390.4             | 2            | 4.1601 | 0.3626 |

| Peptide Sequence                   | Peptide mass (m/z) | Charge State | Xcorr  | DelCn2 |
|------------------------------------|--------------------|--------------|--------|--------|
| TDQVIQSLIALVNDPQPEHPLR             | 2484.8             | 2            | 5.6673 | 0.4093 |
| TDQVIQSLIALVNDPQPEHPLRADLAE EYSK   | 3491.8             | 3            | 7.0239 | 0.2288 |
| TDQVIQSLIALVNDPQPEHPLRADLAE EYSKDR | 3763.1             | 3            | 4.5984 | 0.1551 |
| TDSSPNQAR                          | 976.0              | 2            | 2.5086 | 0.1309 |
| TDTESELDLISR                       | 1379.5             | 2            | 3.6187 | 0.2439 |
| TDTGRGNGPLPLGG SGLMEEMSALLAR       | 2702.1             | 3            | 6.0758 | 0.3962 |
| TDTGVSLQTYDDLLAK                   | 1740.9             | 2            | 4.2979 | 0.3077 |
| TDTLEDLFPTTK                       | 1381.5             | 2            | 3.8526 | 0.3496 |
| TDTLEDLFPTTKIPNPR                  | 1959.2             | 3            | 4.1881 | 0.3512 |
| TDTSHHDQDHPTFNK                    | 1780.8             | 2            | 3.4774 | 0.4102 |
| TDVAESEKEG LLTR                    | 1548.7             | 2            | 3.7346 | 0.3577 |
| TDVNKIEEFLEEK                      | 1594.7             | 2            | 2.6216 | 0.1685 |
| TDVNKIEEFLEEVLCPPK                 | 2104.4             | 2            | 2.9909 | 0.2087 |
| TDYNASVSVDPDSSGPER                 | 1781.8             | 2            | 4.8596 | 0.5121 |
| TDYVASSIQR                         | 1140.2             | 2            | 3.932  | 0.4573 |
| TEADAECTFE EK                      | 1398.5             | 2            | 3.0936 | 0.2317 |
| TEADAECTFE EKQGTEIDGR              | 2255.3             | 3            | 3.7013 | 0.1968 |
| TEAHKEIHSQQVK                      | 1535.7             | 3            | 4.1262 | 0.4054 |
| TEAPSATGQASSLLGGR                  | 1603.7             | 2            | 3.8059 | 0.3837 |
| TEAVASSLYDILAR                     | 1509.7             | 2            | 3.2776 | 0.2381 |
| TEDGKIYQR                          | 1110.2             | 2            | 2.9157 | 0.2633 |
| TEDGKVEKH YLFYDGESVSGK             | 2389.6             | 3            | 4.5502 | 0.3977 |
| TEDKNSAGHKPSSNR                    | 1628.7             | 2            | 2.5344 | 0.1433 |
| TEDSGLQTQVIAAATQCALSTS QLVACTK     | 2940.3             | 3            | 3.251  | 0.1847 |
| TEDSIRDYEDGMEVDTTPTVAGQFEDADVDH    | 3459.5             | 3            | 5.2624 | 0.2936 |
| TEEDLKKGHQK                        | 1313.4             | 2            | 3.1732 | 0.2786 |
| TEEGPTLSYGR                        | 1210.3             | 2            | 3.1656 | 0.2508 |
| TEEIHENVISPSDLSDIKGSVLHSR          | 2764.0             | 3            | 5.2926 | 0.3665 |
| TEELAQAYDAFTLAPASTSR               | 2143.3             | 2            | 2.4619 | 0.1262 |
| TEELNREVAGHTEQLQMSR                | 2229.4             | 3            | 5.1792 | 0.4301 |
| TEEQGIPRPLHPPPPPPVQPPQHPR          | 2800.2             | 3            | 4.3852 | 0.314  |
| TEEREQQLQSTLQQAQGFHSEIEDF LLELTR   | 3706.0             | 3            | 4.1618 | 0.3013 |
| TEETLFEIQGIDPIASAIQNLK             | 2431.7             | 3            | 3.4658 | 0.1775 |
| TEFLSFMNTELA AFTK                  | 1851.1             | 2            | 5.4349 | 0.4771 |
| TEGAEKKQQMAR                       | 1377.6             | 2            | 3.2285 | 0.2031 |
| TEGD EEA EEEQEENLEASGDYK           | 2502.4             | 2            | 5.5223 | 0.4321 |

| Peptide Sequence                               | Peptide mass (m/z) | Charge State | Xcorr  | DelCn2 |
|------------------------------------------------|--------------------|--------------|--------|--------|
| TEGLSVLSQAMAVIK                                | 1547.8             | 2            | 2.4045 | 0.2675 |
| TEGNIDDSLIGGNASAEPEGEGTESTVITGVDIVMNHHLQETSFTK | 4860.2             | 3            | 5.406  | 0.3934 |
| TEHINIHQLR                                     | 1261.4             | 2            | 2.966  | 0.2842 |
| TEIDKPSQMQVTDVQDNSISVK                         | 2463.7             | 3            | 4.1115 | 0.1968 |
| TEILSLEKPLLLHTGMGR                             | 2009.4             | 3            | 4.3009 | 0.3348 |
| TEIQQSALSLLNGTFDFQNDFLR                        | 2787.0             | 3            | 5.2524 | 0.3221 |
| TEISEMNR                                       | 980.1              | 2            | 2.6073 | 0.2255 |
| TEKEESTEVLK                                    | 1293.4             | 2            | 2.6512 | 0.203  |
| TEKETIQKDLDAK                                  | 1519.7             | 2            | 4.0423 | 0.3022 |
| TEKHESQKDYVK                                   | 1492.6             | 2            | 3.9436 | 0.3367 |
| TEKQLEAIDQLHLEYAK                              | 2030.3             | 3            | 3.3234 | 0.2032 |
| TEKYEHKSEVK                                    | 1378.5             | 2            | 3.478  | 0.2417 |
| TEKYVDTPFGKPSDALILGK                           | 2180.5             | 3            | 3.5742 | 0.1792 |
| TELADKVTK                                      | 1005.1             | 2            | 2.848  | 0.1423 |
| TELADKVTKLQVELDNVTGLLSQSDDSK                   | 2933.3             | 3            | 5.5276 | 0.4503 |
| TELEDAHLENLLSK                                 | 1483.6             | 2            | 2.478  | 0.2938 |
| TELENKLQQQLTQAAQELAAEKEK                       | 2743.0             | 3            | 5.6366 | 0.4446 |
| TELEHGQLISVEK                                  | 1354.5             | 2            | 3.0293 | 0.3154 |
| TELEHLNHLAENNVFGIVPLAKPEEK                     | 2814.2             | 3            | 4.5858 | 0.2959 |
| TELEISVSEVHPSR                                 | 1454.6             | 2            | 3.0803 | 0.1575 |
| TELEPGDRDNLAIQTR                               | 1813.0             | 2            | 4.0212 | 0.2748 |
| TELELRPGIEDVAVLKK                              | 1910.2             | 3            | 3.8681 | 0.2459 |
| TELEPQFVSYFQQR                                 | 1643.8             | 2            | 3.6006 | 0.3563 |
| TELERPGETLNVNFKLLR                             | 1873.1             | 3            | 5.2768 | 0.4095 |
| TELESPSFINPNLEWFASEEPTTEESEKPLTQSGGAPPPPGGK    | 4451.8             | 3            | 4.1919 | 0.2279 |
| TELETPAYF                                      | 942.0              | 1            | 1.6583 | 0.2025 |
| TELEMDWVLK                                     | 1022.2             | 2            | 2.5023 | 0.1997 |
| TELEMEDLMSSKDDVGK                              | 1685.9             | 2            | 4.064  | 0.4244 |
| TELEMEDLMSSKDDVGKSVHELEK                       | 2508.8             | 3            | 4.7919 | 0.3473 |
| TELEMESEVLTEILR                                | 1421.6             | 2            | 3.2144 | 0.2363 |
| TELENLLGSYFPK                                  | 1269.4             | 2            | 3.8466 | 0.2697 |
| TELENNDHINLK                                   | 1198.3             | 2            | 3.3316 | 0.2809 |
| TELENPGDASDLQGR                                | 1360.4             | 2            | 2.9123 | 0.121  |
| TELENPLILIDEVDKIGR                             | 1826.1             | 2            | 3.1612 | 0.2155 |
| TELENVFVDEPLIHATTYIPLMDNADSSPVVDKR             | 3589.0             | 3            | 4.8835 | 0.3254 |
| TELEPMAWNETADLGLDIGAQGEPLGYRQDDPSYR            | 3667.9             | 3            | 3.7009 | 0.289  |

| Peptide Sequence                      | Peptide mass (m/z) | Charge State | Xcorr  | DelCn2 |
|---------------------------------------|--------------------|--------------|--------|--------|
| TEPTAQQNLALQLAEK                      | 1756.0             | 2            | 4.2385 | 0.3909 |
| TEPTAQQNLALQLAEKLGSLVENNER            | 2868.1             | 3            | 4.3116 | 0.3691 |
| TEPVPDQDELQLSK                        | 1714.8             | 2            | 3.4002 | 0.3963 |
| TEQGPQVDETQFK                         | 1507.6             | 2            | 3.979  | 0.3938 |
| TEQGPQVDETQFKK                        | 1635.8             | 2            | 3.423  | 0.3916 |
| TEQKEPKPLEK                           | 1327.5             | 2            | 3.3626 | 0.1731 |
| TEQTEDLKR                             | 1120.2             | 2            | 2.5316 | 0.1602 |
| TERPVNSAALSPNYDHSVVLGGGQEAMDVTTTSTR   | 3575.9             | 3            | 7.4325 | 0.3097 |
| TESSTEGKEQEEK                         | 1482.5             | 2            | 3.3396 | 0.2963 |
| TESTLNALLQR                           | 1246.4             | 2            | 3.0281 | 0.1294 |
| TESTPITAVKQPEK                        | 1529.7             | 2            | 3.5172 | 0.3021 |
| TESTPITAVKQPEKVAATRQEIFQEQLAAVPEFR    | 3815.3             | 3            | 5.7958 | 0.4352 |
| TETEKQHMNTIK                          | 1460.6             | 2            | 2.8607 | 0.2611 |
| TETIRPASVYTK                          | 1366.5             | 2            | 2.854  | 0.2053 |
| TETQEKNPSPK                           | 1372.5             | 2            | 3.6616 | 0.2599 |
| TETQEKNPSPKETIEQEK                    | 2230.4             | 3            | 4.9658 | 0.4051 |
| TETQEKNPSPKETIEQEKQAGES               | 2702.9             | 3            | 5.165  | 0.3883 |
| TETQEKNTLPTK                          | 1390.5             | 2            | 3.4697 | 0.2111 |
| TETQEKNTLPTKETIEQEK                   | 2248.4             | 3            | 3.7026 | 0.2205 |
| TETQEKNTLPTKETIEQEKR                  | 2404.6             | 3            | 5.452  | 0.4388 |
| TETQEKNTLPTKETIEQEKRSEIS              | 2821.0             | 3            | 5.7825 | 0.3369 |
| TETVEEPMEEEEAAKEEKEESDDEAAVEEEEEEEKPK | 4311.4             | 3            | 5.9431 | 0.2291 |
| TEVALAKDMESPTKLDVTLAK                 | 2261.6             | 3            | 3.7983 | 0.2388 |
| TEWLDGK                               | 848.9              | 2            | 2.4007 | 0.1399 |
| TEWLDGKHVVFGK                         | 1516.7             | 2            | 4.1066 | 0.419  |
| TEYLSNADER                            | 1198.2             | 2            | 2.8275 | 0.2994 |
| TEYQATHGSR                            | 1150.2             | 2            | 2.8837 | 0.3464 |
| TFAGNTPLHLAAGLGYPTLTR                 | 2172.5             | 3            | 5.3044 | 0.4082 |
| TFAPEEISAMVLTK                        | 1537.8             | 2            | 4.9184 | 0.3874 |
| TFDEIASGFR                            | 1143.2             | 2            | 3      | 0.4295 |
| TFDMHSLESSLIDIMR                      | 1896.2             | 2            | 3.3282 | 0.3667 |
| TFDQLTPDESKER                         | 1566.7             | 2            | 3.7752 | 0.4063 |
| TFDQLTPDESKER                         | 1580.7             | 2            | 3.534  | 0.2929 |
| TFDSIVMDPK                            | 1153.3             | 2            | 3.3511 | 0.3704 |
| TFEEKLTPLLSVR                         | 1533.8             | 2            | 4.2091 | 0.3239 |
| TFEELKKHEDSAIPR                       | 1801.0             | 2            | 3.7023 | 0.4203 |

| Peptide Sequence               | Peptide mass (m/z) | Charge State | Xcorr  | DelCn2 |
|--------------------------------|--------------------|--------------|--------|--------|
| TFEGIDPK                       | 907.0              | 2            | 2.7177 | 0.2471 |
| TFEGVDPQTSMR                   | 1469.6             | 2            | 3.0758 | 0.3467 |
| TFEHVTSEIGAEAEVGVVEHLLR        | 2682.9             | 3            | 6.1109 | 0.53   |
| TFEINPR                        | 877.0              | 1            | 2.6086 | 0.159  |
| TFEMSDFIVDTR                   | 1461.6             | 2            | 3.459  | 0.3203 |
| TFESLVDFSK                     | 1173.3             | 2            | 3.9004 | 0.3425 |
| TFFIHFQQQ                      | 1196.3             | 2            | 2.6484 | 0.1765 |
| TFFLEALR                       | 997.2              | 2            | 3.0695 | 0.2215 |
| TFFPEEISSMVLTK                 | 1629.9             | 2            | 3.2559 | 0.3109 |
| TFFSFPVAVVAPFK                 | 1458.7             | 2            | 4.0576 | 0.4703 |
| TFGETHPFTK                     | 1165.3             | 2            | 3.0554 | 0.3295 |
| TFHETLDCCGSSTLTALTTSVLK        | 2429.8             | 2            | 4.9425 | 0.4085 |
| TFHFNTVEEVHSR                  | 1603.7             | 2            | 4.6137 | 0.4705 |
| TFHGAGLVVPVDKNDVGYRELPETDADLKR | 3313.7             | 3            | 4.873  | 0.2822 |
| TFHHVYSGKDIAQAR                | 1844.1             | 3            | 3.745  | 0.3122 |
| TFHIFYQLLSGAGEHLK              | 1962.2             | 2            | 5.2571 | 0.3818 |
| TFHIFYYLLSGAGEHLK              | 1997.3             | 2            | 6.1581 | 0.4698 |
| TFIAIKPDGVQR                   | 1345.6             | 2            | 3.1425 | 0.2045 |
| TFIGPGGNMPGYLRPETAQGIFLNFK     | 2827.3             | 3            | 3.6842 | 0.2781 |
| TFIGPGGNMPGYLRPETAQGIFLNFKR    | 2983.4             | 3            | 3.2725 | 0.215  |
| TFIIGELHPDDRPK                 | 1638.8             | 2            | 4.3196 | 0.3422 |
| TFKEFLLSLDDSVDETEAVKR          | 2443.7             | 3            | 5.6552 | 0.4638 |
| TFKIPDKQYVLTALAAR              | 1936.3             | 3            | 3.5802 | 0.203  |
| TFLEGFRLPGEAQK                 | 1593.8             | 2            | 3.3409 | 0.2075 |
| TFLETSTDTAVTNEWVKR             | 2129.3             | 2            | 2.8463 | 0.2994 |
| TFLLEYHNR                      | 1193.3             | 2            | 2.8243 | 0.2304 |
| TFLQDLAR                       | 964.1              | 2            | 2.5085 | 0.1093 |
| TFLRSPPEDEAIYGPNTK             | 2036.2             | 2            | 4.3068 | 0.3877 |
| TFLTSLQDMASR                   | 1483.7             | 2            | 4.1823 | 0.3853 |
| TFLVWVNEEDHLR                  | 1658.8             | 2            | 4.1063 | 0.3624 |
| TFNIKNDFTEEEEAQVR              | 2071.2             | 3            | 4.1467 | 0.2964 |
| TFNIKNDFTEEEEAQVRK             | 2199.4             | 3            | 3.7043 | 0.223  |
| TFNKLAEFGAEFK                  | 1502.7             | 2            | 2.615  | 0.2088 |
| TFNLEKQNHTPR                   | 1485.6             | 2            | 3.2437 | 0.4026 |
| TFNLPLMLGGGGYTIR               | 1824.2             | 2            | 4.5611 | 0.4347 |
| TFNLTAGSLESTEPIYVYK            | 2134.4             | 2            | 5.502  | 0.6133 |

| Peptide Sequence                | Peptide mass (m/z) | Charge State | Xcorr  | DelCn2 |
|---------------------------------|--------------------|--------------|--------|--------|
| TFNQVEIKPEMIGHYLGFEFSITYKPVK    | 3170.7             | 3            | 6.2435 | 0.4619 |
| TFNTSTGGLLLPSDTK                | 1652.8             | 2            | 4.3816 | 0.3625 |
| TFNTSTGGLLLPSDTKR               | 1809.0             | 2            | 4.3795 | 0.4804 |
| TFNVDMYEEIHR                    | 1554.7             | 2            | 3.2609 | 0.3477 |
| TFPNHYSIVTGLYEESHGIVANSMYDAVTK  | 3345.7             | 3            | 5.162  | 0.4452 |
| TFPNHYSIVTGLYEESHGIVANSMYDAVTKK | 3473.9             | 3            | 4.0155 | 0.2638 |
| TFPTINIEPDIKR                   | 1544.8             | 2            | 3.1863 | 0.3413 |
| TFQLQLLSPSSSIVPAFNTGTITQVIK     | 2892.3             | 3            | 6.6989 | 0.4078 |
| TFRLNEIDKESQKPFVKGPLPVHTK       | 3039.5             | 3            | 3.7296 | 0.2291 |
| TFRPPYYHR                       | 1237.4             | 3            | 3.7927 | 0.3466 |
| TFSFAIPLIEK                     | 1266.5             | 2            | 2.4085 | 0.2437 |
| TFSFAIPLIEKLHGELQDR             | 2215.5             | 2            | 2.5317 | 0.1175 |
| TFSGQTHGFVHR                    | 1374.5             | 2            | 3.4985 | 0.5139 |
| TFSHELSDFGLESTAGEIPVVAIR        | 2576.8             | 2            | 5.4011 | 0.4479 |
| TFSQSSHLVQHR                    | 1427.6             | 2            | 3.5413 | 0.3353 |
| TFSVWYVPEVTGTHK                 | 1752.0             | 2            | 2.5455 | 0.1288 |
| TFSYAGFEMQPK                    | 1406.6             | 2            | 3.61   | 0.4399 |
| TFTAWCNSHLR                     | 1336.5             | 2            | 2.735  | 0.2831 |
| TFTDCFNCLPIAAIVDEK              | 2001.3             | 2            | 3.5011 | 0.1068 |
| TFTDHMLMVEWNDKGGWQPR            | 2449.8             | 3            | 5.3082 | 0.352  |
| TFTEMDSHEEK                     | 1354.4             | 2            | 2.6319 | 0.2557 |
| TFTEMDSHEEKVFR                  | 1756.9             | 2            | 4.3328 | 0.4561 |
| TFTGEHVVALMPEVGLQHAR            | 2280.6             | 3            | 3.4904 | 0.2755 |
| TFTTQETITNAETAK                 | 1656.8             | 2            | 4.4963 | 0.4611 |
| TFTTQETITNAETAKEWFLQAAK         | 2630.9             | 2            | 3.9905 | 0.4086 |
| TFTTQETITNAETAKEWFLQAAKDPSAVAK  | 3299.6             | 3            | 6.0789 | 0.4859 |
| TFVAGIKEDTEEHHLR                | 1883.1             | 2            | 4.2633 | 0.3002 |
| TFVEESIYNEFLER                  | 1776.9             | 2            | 3.2972 | 0.2656 |
| TFVHVVPKPEGTFK                  | 1657.9             | 3            | 3.8759 | 0.4171 |
| TFVNITPAEVGVLVGK                | 1644.9             | 2            | 5.5268 | 0.4566 |
| TFVNITPAEVGVLVGKDR              | 1916.2             | 2            | 4.728  | 0.4205 |
| TFVQEDIYDEFVER                  | 1790.9             | 2            | 5.103  | 0.4882 |
| TFYGLHQDFPSVVLVGLGK             | 2078.4             | 2            | 5.0999 | 0.5171 |
| TFYGLHQDFPSVVLVGLGKK            | 2206.6             | 3            | 5.7366 | 0.509  |
| TFYNQAIMSSK                     | 1290.5             | 2            | 2.5614 | 0.3281 |
| TGAAPIIDVVR                     | 1112.3             | 2            | 2.8135 | 0.3364 |



| Peptide Sequence                       | Peptide mass (m/z) | Charge State | Xcorr  | DelCn2 |
|----------------------------------------|--------------------|--------------|--------|--------|
| TGAEGAVLDEAK                           | 1161.2             | 2            | 3.1157 | 0.2679 |
| TGAEGAVLDEAKNINK                       | 1630.8             | 2            | 4.2568 | 0.2818 |
| TGAFSIPVIQIVYETLKDQQEGK                | 2565.9             | 2            | 3.4009 | 0.3107 |
| TGAFSIPVIQIVYETLKDQQEGKK               | 2694.1             | 2            | 2.8985 | 0.1725 |
| TGAHLELSLAK                            | 1140.3             | 2            | 2.8749 | 0.2859 |
| TGAIVDVPVGEELLGR                       | 1625.8             | 3            | 5.1518 | 0.5087 |
| TGAIVDVPVGEELLGRVVDALGNAIDGK           | 2779.1             | 3            | 3.8669 | 0.2782 |
| TGAIVDVPVGEELLGRVVDALGNAIDGKGPIGSK     | 3318.8             | 3            | 6.1581 | 0.5763 |
| TGAIVDVPVGEELLGRVVDALGNAIDGKGPIGSKTR   | 3576.1             | 3            | 4.0597 | 0.2561 |
| TGALEGPEVDGFVK                         | 1419.6             | 2            | 3.6063 | 0.2786 |
| TGALEGPEVDGFVKDMMELVQPSISGVLDLKD       | 3278.7             | 3            | 4.6256 | 0.2574 |
| TGALEGPEVDGFVKDMMELVQPSISGVLDLKD KFR   | 3582.1             | 3            | 6.4175 | 0.5017 |
| TGALLLQGFQDR                           | 1432.6             | 2            | 4.3155 | 0.3513 |
| TGAQELLR                               | 888.0              | 2            | 2.9218 | 0.2055 |
| TGASFQQAQEEFSQGFSSR                    | 2206.3             | 3            | 4.4994 | 0.4343 |
| TGDDYIAIGADEEELGSQIEEAIYQEIR           | 3129.3             | 3            | 5.4315 | 0.511  |
| TGDEEMLKDK                             | 1166.3             | 2            | 2.7618 | 0.263  |
| TGDFQLHTNVNDGTEFGGSIYQK                | 2529.7             | 3            | 6.0543 | 0.5542 |
| TGDLLEVQQPVDLGALR                      | 1825.1             | 2            | 5.3115 | 0.3984 |
| TGDPNMGDSAVPTHWEPTYTTENSGYLEITKK       | 3440.7             | 3            | 4.4198 | 0.264  |
| TGDTGMLPANYVEAI                        | 1552.7             | 2            | 2.5591 | 0.1245 |
| TGEAIVDAALSALR                         | 1387.6             | 2            | 4.7973 | 0.3399 |
| TGEAQIHHLVLRPYVGIHLR                   | 2268.6             | 3            | 3.5214 | 0.3303 |
| TGEAYVQFEEPAMANQALLK                   | 2269.5             | 2            | 3.6983 | 0.2659 |
| TGEEDKKINEELESQYQQSMDSK                | 2717.9             | 3            | 5.5385 | 0.4435 |
| TGEEKYVEESK                            | 1299.4             | 2            | 3.3161 | 0.3005 |
| TGEGFYKYK                              | 1093.2             | 2            | 2.8667 | 0.3368 |
| TGEKPNGSVEPER                          | 1400.5             | 2            | 4.5354 | 0.2502 |
| TGEKPNGSVEPERELDLPVDLDDISEADLDHPDLFQNR | 4277.5             | 3            | 4.9149 | 0.3802 |
| TGEMSGPVFTDSGIHILR                     | 2031.3             | 3            | 4.7914 | 0.3779 |
| TGEMSGPVFTDSGIHILRTE                   | 2261.5             | 2            | 3.8886 | 0.3318 |
| TGENVEDAFLEAAK                         | 1494.6             | 2            | 4.0031 | 0.3226 |
| TGENVEDAFLEAAKK                        | 1622.8             | 2            | 4.6226 | 0.3898 |
| TGEVLDTK                               | 862.9              | 1            | 2.625  | 0.1482 |
| TGEVVVTSKK                             | 1048.2             | 2            | 2.776  | 0.1765 |
| TGFAVIHDAAR                            | 1158.3             | 2            | 3.1795 | 0.3187 |

| Peptide Sequence                            | Peptide mass (m/z) | Charge State | Xcorr  | DelCn2 |
|---------------------------------------------|--------------------|--------------|--------|--------|
| TGFGFTNVTAHQKWKFSR                          | 2113.4             | 2            | 2.8908 | 0.1192 |
| TGFLEIDEHMR                                 | 1348.5             | 2            | 3.0169 | 0.2454 |
| TGGADQSLQQGEGSK                             | 1463.5             | 2            | 4.1556 | 0.4373 |
| TGGADQSLQQGEGSKK                            | 1591.7             | 2            | 3.9728 | 0.3187 |
| TGGAFSNALSSLNVLRPGEIPDAAFIHAAR              | 3054.4             | 3            | 4.3955 | 0.2749 |
| TGGFGAAPVFGSPPTFGGSPGFGVPAFGSAPAFTSPLGSTGGK | 3958.3             | 3            | 3.3886 | 0.2355 |
| TGGKEAASGTTPQK                              | 1333.4             | 2            | 3.6249 | 0.3425 |
| TGGLEIDSDFGGFR                              | 1471.6             | 2            | 3.8761 | 0.2597 |
| TGGMAFHSYFMEAIAPLLQELKK                     | 2681.2             | 3            | 4.0041 | 0.1349 |
| TGGTVSDQALLFGDDDAGEGPSSLIR                  | 2579.7             | 2            | 3.2312 | 0.2949 |
| TGGVQTVTLIPGDGIGPEISAAVMK                   | 2412.8             | 3            | 5.2679 | 0.3936 |
| TGHIAAGTSTNGIK                              | 1328.5             | 2            | 3.3735 | 0.4237 |
| TGHIAAGTSTNGIKFK                            | 1603.8             | 3            | 3.2388 | 0.1944 |
| TGHSLHTLYGR                                 | 1355.5             | 2            | 3.8685 | 0.4062 |
| TGIDLTTGR                                   | 991.1              | 2            | 2.8936 | 0.1625 |
| TGIKNGVHFLQLELINGR                          | 2010.3             | 3            | 3.4995 | 0.1355 |
| TGISDVFAK                                   | 938.1              | 2            | 2.7916 | 0.1664 |
| TGISDVFAKNDLAVVDVR                          | 1920.2             | 2            | 5.2466 | 0.4557 |
| TGISHGHTVYVVHDFEGLAK                        | 2225.4             | 3            | 5.6007 | 0.5481 |
| TGIYEEK                                     | 839.9              | 1            | 1.7748 | 0.1459 |
| TGIYEEKHAK                                  | 1176.3             | 2            | 2.698  | 0.2636 |
| TGKGQPSNKEDVDDLVSQLR                        | 2187.4             | 3            | 3.7425 | 0.2235 |
| TGKIPVTDEEQTNVPYIYAIGDILEDKVELTPVAIQAGR     | 4258.8             | 3            | 6.3255 | 0.5183 |
| TGKLQQEEVQK                                 | 1288.4             | 2            | 2.5022 | 0.1369 |
| TGKLQQEEVQKK                                | 1416.6             | 3            | 4.5985 | 0.2982 |
| TGKPLSVELGPGIMGAIFDGIQRPLSDISSQTQSIYIPR     | 4144.7             | 3            | 6.6156 | 0.4989 |
| TGKPMINLYTDKDTGKPK                          | 2008.3             | 3            | 4.0635 | 0.2707 |
| TGKQEEAFTLAQEVAALEPTDDNSLQALTILYR           | 3638.0             | 3            | 5.1154 | 0.2735 |
| TGKSIEQLEKELLNGQK                           | 1916.2             | 2            | 5.0505 | 0.2965 |
| TGKSIEQLEKELLNGQKLQGPETAR                   | 2769.1             | 3            | 4.5174 | 0.2677 |
| TGKTIEELEKEMLINGQKLQGPQTSAEVYR              | 3279.7             | 3            | 5.4182 | 0.4193 |
| TGLEDPERYLFVDR                              | 1710.9             | 3            | 3.3119 | 0.2184 |
| TGLIDYNQLALTAR                              | 1549.8             | 2            | 4.1934 | 0.3871 |
| TGLIKSGTAEVELK                              | 1503.7             | 2            | 3.0314 | 0.1975 |
| TGLIKSGTAEVELKK                             | 1631.9             | 2            | 4.3885 | 0.3766 |
| TGLKELEFLK                                  | 1178.4             | 2            | 2.4697 | 0.1381 |

| Peptide Sequence                      | Peptide mass (m/z) | Charge State | Xcorr  | DelCn2 |
|---------------------------------------|--------------------|--------------|--------|--------|
| TGLLATLTR                             | 946.1              | 2            | 2.6681 | 0.1911 |
| TGLQAGLTIDEFAPR                       | 1589.8             | 2            | 2.7119 | 0.2185 |
| TGLSQLHNALNDVKDIQQSLADVSKDWR          | 3153.5             | 3            | 4.0463 | 0.3246 |
| TGLVEFAR                              | 893.0              | 2            | 2.8386 | 0.2405 |
| TGLYNYDDEKEK                          | 1638.7             | 2            | 3.5877 | 0.224  |
| TGMILLAGEITSR                         | 1362.6             | 2            | 3.235  | 0.348  |
| TGNFQVTELGR                           | 1222.3             | 2            | 2.6686 | 0.3176 |
| TGNKYNVYPTYDFACPIVDSIEGVTHALR         | 3245.6             | 3            | 4.7133 | 0.3069 |
| TGNQHFGYLYGR                          | 1413.5             | 2            | 3.6252 | 0.3364 |
| TGNSEKETALPSTK                        | 1463.6             | 2            | 4.4892 | 0.4283 |
| TGPAATTLPDGAAAESLVESSEVAVIGFFK        | 2937.2             | 3            | 5.8147 | 0.5026 |
| TGPAATTLPDGAAAESLVESSEVAVIGFFKDVESDSA | 3769.1             | 3            | 3.7486 | 0.3345 |
| TGPD PASAPGR                          | 1026.1             | 2            | 2.4859 | 0.2176 |
| TGPNLHGLFGR                           | 1169.3             | 2            | 3.2754 | 0.4128 |
| TGPNLHGLFGRK                          | 1297.5             | 2            | 3.2743 | 0.3307 |
| TGPSGHNIR                             | 939.0              | 2            | 2.4553 | 0.3106 |
| TGPVTLHTQTAIHF AEQIAK                 | 2164.4             | 2            | 4.2446 | 0.2613 |
| TGQAAELGLLK                           | 1158.3             | 2            | 3.0702 | 0.2525 |
| TGQAAELGLLKYVRPFLNSISK                | 2463.9             | 3            | 3.284  | 0.2642 |
| TGQAPGYSYTAANK                        | 1429.5             | 2            | 4.4042 | 0.3829 |
| TGQEIPVNVR                            | 1113.2             | 2            | 3.3432 | 0.2974 |
| TGQEVVFAEPDNK                         | 1533.7             | 2            | 3.6857 | 0.201  |
| TGQEVVFAEPDNKNVYK                     | 2038.2             | 2            | 3.0574 | 0.1187 |
| TGQEYKPGNPPAEIGQNISSNSSASILESK        | 3105.3             | 3            | 5.3152 | 0.3558 |
| TGQIKEVER                             | 1060.2             | 2            | 2.8727 | 0.1634 |
| TGQPMIHIYLDKETGKPK                    | 2057.4             | 2            | 5.0755 | 0.4206 |
| TGQPMINLYTDR                          | 1409.6             | 2            | 2.4998 | 0.2023 |
| TGQPMINLYTDRETGK                      | 1825.0             | 2            | 4.0993 | 0.3752 |
| TGRLPEAAFLAR                          | 1302.5             | 3            | 4.2158 | 0.2399 |
| TGSAVAPVHPPNR                         | 1303.5             | 2            | 3.2826 | 0.1984 |
| TGSESSQTGTSTTSSR                      | 1574.5             | 2            | 4.2571 | 0.427  |
| TGSGGVASSSESNR                        | 1296.3             | 2            | 3.1515 | 0.4476 |
| TGSHSEPQAR                            | 1070.1             | 2            | 2.5252 | 0.1293 |
| TGSNISGASSDISLDEQYKHQLEETKK           | 2967.1             | 3            | 3.5871 | 0.1611 |
| TGSPGSPGAGGVQSTAK                     | 1459.5             | 2            | 3.6663 | 0.3514 |
| TGSPGSPGAGGVQSTAKK                    | 1587.7             | 2            | 2.9746 | 0.3523 |

| Peptide Sequence                         | Peptide mass (m/z) | Charge State | Xcorr  | DelCn2 |
|------------------------------------------|--------------------|--------------|--------|--------|
| TGSQQCTQVR                               | 1165.3             | 2            | 3.6488 | 0.2812 |
| TGSSAQEAASGVALGEAPDHSYESLR               | 2591.7             | 2            | 5.2878 | 0.4557 |
| TGSSAQEAASGVALGEAPDHSYESLRVTSAQK         | 3206.4             | 3            | 6.1464 | 0.3917 |
| TGSSAQEEASGVALGEAPDHSYESLR               | 2649.7             | 3            | 5.6232 | 0.364  |
| TGTAEMSSILEER                            | 1424.6             | 2            | 3.7962 | 0.3769 |
| TGTAYTFFTPNNIK                           | 1575.7             | 2            | 4.151  | 0.4066 |
| TGTAYTFFTPNNIKQVSDLISVLR                 | 2687.0             | 3            | 3.4056 | 0.2273 |
| TGTDKTLVKEVVQNFAK                        | 1879.1             | 3            | 4.0526 | 0.3674 |
| TGTITTFEHAHNMR                           | 1616.8             | 2            | 4.3945 | 0.4892 |
| TGTQYLLR                                 | 952.1              | 2            | 2.6203 | 0.2807 |
| TGTyrQLFHPEQLITGKEDAANNYAR               | 2995.3             | 3            | 4.8699 | 0.2918 |
| TGVAVNKPAEFTVDAK                         | 1647.9             | 2            | 4.1153 | 0.2958 |
| TGVELGKPTHFTVNAK                         | 1699.9             | 2            | 4.2998 | 0.3718 |
| TGVHHYSGNNIELGTACGK                      | 1959.1             | 2            | 5.1687 | 0.4578 |
| TGVIEHEHPVNK                             | 1360.5             | 2            | 3.2741 | 0.1951 |
| TGVKDASDQNFDMFK                          | 1867.0             | 2            | 3.1035 | 0.145  |
| TGVVKEGDQIVGATIYFDNLQSGEVTQLLNTMGHHTVGLK | 4272.8             | 3            | 3.4798 | 0.2624 |
| TGYESGEYEMLGELGVKETPQQK                  | 2631.9             | 3            | 4.8442 | 0.3508 |
| TGYSDPEPESPPAPGR                         | 1657.7             | 2            | 3.2171 | 0.1664 |
| TGYSMVQENGQR                             | 1370.5             | 2            | 3.5951 | 0.3785 |
| TGYTLDVTTGQR                             | 1312.4             | 2            | 3.2686 | 0.3034 |
| TGYTLDVTTGQRK                            | 1440.6             | 2            | 3.3889 | 0.1381 |
| TGYTPDEKLR                               | 1180.3             | 2            | 2.6396 | 0.1948 |
| TGYTQASQNIR                              | 1239.3             | 2            | 2.8583 | 0.184  |
| THAAEDIVYTLQLEDR                         | 1875.0             | 2            | 3.1092 | 0.1854 |
| THAVLVALKR                               | 1108.4             | 2            | 3.6186 | 0.366  |
| THDMFVADNGKPVPLDEESHK                    | 2367.6             | 3            | 3.4775 | 0.1747 |
| THEDIAQIR                                | 1212.3             | 2            | 3.3172 | 0.3278 |
| THEDIAQIREIQGK                           | 1767.9             | 2            | 4.3642 | 0.377  |
| THEDIAQIREIQGKK                          | 1896.1             | 2            | 4.6388 | 0.357  |
| THETFHEEEEDMDSYQDRDLER                   | 2812.8             | 3            | 3.4903 | 0.3041 |
| THETLSHAGQK                              | 1209.3             | 2            | 2.5576 | 0.2481 |
| THFEYEKESPYGLSFNKGEVFR                   | 2665.9             | 3            | 4.8615 | 0.4817 |
| THFGGGK                                  | 703.8              | 1            | 1.7447 | 0.1162 |
| THFGGGKTTGFGMIYDSL DYAK                  | 2367.6             | 2            | 5.2081 | 0.5177 |
| THFTVR                                   | 760.9              | 1            | 1.6042 | 0.1504 |

| Peptide Sequence                         | Peptide mass (m/z) | Charge State | Xcorr  | DelCn2 |
|------------------------------------------|--------------------|--------------|--------|--------|
| THGSFILPHISTAR                           | 1537.7             | 2            | 2.5153 | 0.2219 |
| THHILIDLR                                | 1118.3             | 2            | 3.0925 | 0.3032 |
| THIDTVINALKTER                           | 1611.8             | 2            | 3.3397 | 0.3562 |
| THIETVINALKTER                           | 1625.9             | 2            | 4.3402 | 0.4016 |
| THILLFLPK                                | 1082.4             | 2            | 3.089  | 0.2866 |
| THINIVVIGHVDSGK                          | 1589.8             | 2            | 5.3146 | 0.5402 |
| THINIVVIGHVDSGKSTTTGHLIYK                | 2692.1             | 3            | 6.0073 | 0.3312 |
| THINTVIIGHVDSGK                          | 1591.8             | 2            | 2.6409 | 0.2842 |
| THINYGVKGDVAVVR                          | 1628.9             | 2            | 2.478  | 0.118  |
| THLGEALAPLSK                             | 1237.4             | 2            | 3.6348 | 0.483  |
| THLLSRLPIPESQVITINPELPEVEEAEDYAK         | 3575.0             | 3            | 5.326  | 0.3267 |
| THLPEVFLSK                               | 1171.4             | 2            | 2.4163 | 0.1075 |
| THLPGFVEQAEALK                           | 1540.7             | 2            | 4.3404 | 0.4866 |
| THLPGFVEQAEALKAK                         | 1740.0             | 3            | 4.347  | 0.4429 |
| THLPTIESAIHSVLR                          | 1674.9             | 2            | 3.592  | 0.4148 |
| THLRDMIILPEMVGSMVGVYNGK                  | 2562.1             | 3            | 3.4157 | 0.2383 |
| THLSALVHHSVIPDRPPGASAGLTK                | 2660.0             | 3            | 3.3106 | 0.1209 |
| THLSLSHNPEQK                             | 1391.5             | 2            | 3.8829 | 0.2417 |
| THLTEDTPKVNADIEKVNQNQAK                  | 2594.8             | 3            | 5.8917 | 0.514  |
| THLYGSLLYYLQIAQRPEPDTLEAAK               | 3107.5             | 3            | 3.5261 | 0.2138 |
| THLYTLILNPDNSFEILVDQSVVNSGNLLNDMTPPVNPSR | 4440.0             | 3            | 4.7327 | 0.3818 |
| THMADENKNEYAAQLQNFNGEQHK                 | 2819.0             | 3            | 4.7129 | 0.2261 |
| THMQDLKDVTNNVHYENYR                      | 2378.6             | 2            | 6.2777 | 0.4755 |
| THMQNIKDITSSIHFEAYR                      | 2292.6             | 2            | 4.7956 | 0.4632 |
| THMTHHAVSDHEATLR                         | 1844.0             | 3            | 4.655  | 0.4495 |
| THMVVANTMEDFQK                           | 1651.9             | 2            | 4.4494 | 0.3949 |
| THNDIIHNENMR                             | 1494.6             | 2            | 4.6617 | 0.4722 |
| THNGESVSYLFSHVPL                         | 1788.0             | 2            | 4.2549 | 0.482  |
| THNLEPYFESFINNLR                         | 1995.2             | 2            | 3.0887 | 0.3284 |
| THNVHVEIEQR                              | 1362.5             | 2            | 3.6318 | 0.3572 |
| THPHFVIPYR                               | 1267.5             | 2            | 2.722  | 0.3218 |
| THPQWYPAR                                | 1156.3             | 2            | 2.6215 | 0.3645 |
| THPSGRDPETPIIVVK                         | 1747.0             | 2            | 3.6238 | 0.2103 |
| THPSVVPGSIAFSLPQR                        | 1794.0             | 3            | 3.49   | 0.2733 |
| THPSVVPGSIAFSLPQRK                       | 1922.2             | 2            | 3.468  | 0.3858 |
| THSDQFLVAFKEVGR                          | 1734.9             | 2            | 4.5066 | 0.431  |

| Peptide Sequence                      | Peptide mass (m/z) | Charge State | Xcorr  | DelCn2 |
|---------------------------------------|--------------------|--------------|--------|--------|
| THSDSKPYGPM SVGLDFSLPGMEHVYGIPEHADNLR | 3956.4             | 3            | 5.0657 | 0.4622 |
| THSQGGYGSQGYK                         | 1370.4             | 2            | 3.4532 | 0.3434 |
| THSTSSSLGSGESPF SR                    | 1724.8             | 2            | 4.4076 | 0.4563 |
| THTDSSEKELEPEAAEEALENGPK              | 2612.7             | 3            | 4.731  | 0.255  |
| THTDVGLLEYQHHSR                       | 1793.9             | 2            | 5.0623 | 0.4719 |
| THTGEKKFACPECPK                       | 1676.9             | 2            | 2.6138 | 0.1172 |
| THTGERPNACADCGK                       | 1560.7             | 2            | 2.6961 | 0.1015 |
| THTQDAVPLTLGQEFSGYVQQVK               | 2547.8             | 3            | 4.9044 | 0.4393 |
| THTQDAVPLTLGQEFSGYVQQVKYAMTR          | 3170.5             | 3            | 4.5116 | 0.3789 |
| THTQQQAFSLSVFHHWQIVPGDPLDK            | 2947.3             | 3            | 3.6502 | 0.3384 |
| THTSQAILQPVLAAEDFTIFK                 | 2331.7             | 3            | 4.3781 | 0.4022 |
| THTTMSGVAHR                           | 1198.3             | 2            | 2.9427 | 0.4043 |
| THTTSASAR                             | 932.0              | 1            | 1.84   | 0.2433 |
| THVADFAPEVAWVTR                       | 1699.9             | 2            | 4.3408 | 0.5045 |
| THVEKEDGEAR                           | 1271.3             | 2            | 3.5515 | 0.356  |
| THVGSYK                               | 791.9              | 1            | 1.9877 | 0.1549 |
| THVHIGEGPSTISNSTIPENATSSGR            | 2650.8             | 3            | 4.5463 | 0.2203 |
| THYIVGYNLPSYEYLYNLGDQYALK             | 2999.3             | 3            | 5.3234 | 0.494  |
| THYPAQQGEYQTHQPVYHK                   | 2313.5             | 2            | 4.2283 | 0.3562 |
| THYQADIER                             | 1133.2             | 2            | 2.735  | 0.2158 |
| THYSELTTLSQYIK                        | 1786.0             | 2            | 3.8498 | 0.4977 |
| TIADHCPDSACKQDLLAYLQR                 | 2362.7             | 3            | 3.5493 | 0.2693 |
| TIAECLADELINA AK                      | 1575.8             | 2            | 4.9508 | 0.3769 |
| TIAEIFGNPNYLR                         | 1508.7             | 2            | 4.1775 | 0.3471 |
| TIAFLLPMFR                            | 1209.5             | 2            | 3.1666 | 0.1473 |
| TIAIIAEGIPEALTR                       | 1568.8             | 2            | 5.4516 | 0.4878 |
| TIAIIAEGIPEALTRK                      | 1697.0             | 2            | 4.152  | 0.337  |
| TIALNGVEDVRTVLEHYALEDDPLAAFK          | 3101.5             | 3            | 3.2125 | 0.173  |
| TIALNGVEDVRTVLEHYALEDDPLAAFKQR        | 3385.8             | 3            | 3.9475 | 0.232  |
| TIAMDGTEGLVR                          | 1263.4             | 2            | 3.8341 | 0.4038 |
| TIAMDGTEGLVRGQK                       | 1576.8             | 2            | 3.418  | 0.3134 |
| TIAMDGTEGLVRGQKVLDSGAPIKIPVGPETLGR    | 3478.0             | 3            | 5.2294 | 0.3743 |
| TIAPALVSK                             | 900.1              | 1            | 1.9585 | 0.3261 |
| TIAQDYGVLK                            | 1108.3             | 2            | 2.9814 | 0.3115 |
| TIAQDYGVLKADEGISFR                    | 1984.2             | 2            | 5.178  | 0.5529 |
| TIAQGNSNTDVQAAK                       | 1631.8             | 2            | 4.9231 | 0.4941 |

| Peptide Sequence                 | Peptide mass (m/z) | Charge State | Xcorr  | DelCn2 |
|----------------------------------|--------------------|--------------|--------|--------|
| TIAQVLVHLHR                      | 1287.5             | 2            | 3.6857 | 0.3397 |
| TIARQTARCAACRKGQIAGTTRAR         | 2490.9             | 3            | 3.2951 | 0.2223 |
| TIAVDFASEDIYDKIK                 | 1829.0             | 2            | 5.412  | 0.4384 |
| TIAVLLDDILQR                     | 1370.6             | 2            | 4.3246 | 0.3302 |
| TIAYENK                          | 838.9              | 1            | 1.6955 | 0.1154 |
| TIDLEDKLIK                       | 1190.3             | 2            | 3.0136 | 0.2454 |
| TIDLEDKLIKCTKEEHLCTQR            | 2519.8             | 3            | 3.7674 | 0.1164 |
| TIDLEEKLAQAK                     | 1474.6             | 2            | 4.0698 | 0.2628 |
| TIDLEEKLAQAKEENVGLHQTLDQTLNELNCI | 3740.1             | 3            | 3.5028 | 0.1103 |
| TIDDRIVHELNTTVPTASFAGK           | 2386.6             | 3            | 4.7446 | 0.2611 |
| TIDGILLIER                       | 1256.5             | 2            | 3.25   | 0.2298 |
| TIDLGAAAHYTGDKASPDQNASTHTPQSSVK  | 3170.4             | 3            | 6.6187 | 0.401  |
| TIDPELLGK                        | 986.1              | 1            | 2.0461 | 0.1429 |
| TIDQIHKEAEMEEHREHIK              | 2374.6             | 3            | 3.6698 | 0.153  |
| TIDWVAFAEIIPQNQK                 | 1874.1             | 2            | 4.8243 | 0.2885 |
| TIEAEEAHGTVTR                    | 1356.5             | 2            | 3.8084 | 0.4399 |
| TIEEQLDEEHLESHKK                 | 1966.1             | 2            | 4.5337 | 0.3462 |
| TIEKFEKEAAEMGK                   | 1611.8             | 2            | 4.1696 | 0.3961 |
| TIEQIHKEAK                       | 1197.4             | 2            | 2.8026 | 0.1185 |
| TIESANQQTDKLIKELYGQVLYR          | 2598.9             | 3            | 3.5333 | 0.1831 |
| TIESILEPVAQQISHLVIMHEEGEVDGK     | 3103.5             | 3            | 4.1112 | 0.3173 |
| TIEVLQLQDQGSK                    | 1459.6             | 2            | 2.4691 | 0.2133 |
| TIEYLEEVAITFAK                   | 1627.9             | 2            | 4.2143 | 0.4087 |
| TIEYLQPNPASR                     | 1389.5             | 2            | 3.964  | 0.3253 |
| TIFAYFTGSK                       | 1135.3             | 2            | 3.0389 | 0.3632 |
| TIFAYFTGSKDAGGK                  | 1563.7             | 2            | 2.7349 | 0.2783 |
| TIFQGIAAK                        | 949.1              | 1            | 1.8373 | 0.1466 |
| TIFSALENDPLFAR                   | 1594.8             | 2            | 3.6229 | 0.3143 |
| TIFTGHTAVVEDVSWHLLHESLFGSVADDQK  | 3440.8             | 3            | 4.8848 | 0.3761 |
| TIGGGDDSFNTFFSETGAGK             | 2009.1             | 2            | 5.9811 | 0.5827 |
| TIGGGDDSFNTFFSETGAGKHVPR         | 2498.6             | 2            | 4.1554 | 0.4697 |
| TIGGGDDSFNTFFCETGAGK             | 2012.1             | 2            | 4.7943 | 0.4966 |
| TIGNNGDQSHK                      | 1171.2             | 2            | 2.8943 | 0.1866 |
| TIGTGLVTNTLAMTEEEK               | 1909.1             | 2            | 4.4727 | 0.4554 |
| TIGTGLVTNTLAMTEEEKNIK            | 2264.6             | 2            | 4.4094 | 0.3202 |
| TIGTGLVTNTLAMTEEEKNIKWG          | 2507.8             | 2            | 3.5622 | 0.2801 |

| Peptide Sequence                  | Peptide mass (m/z) | Charge State | Xcorr  | DelCn2 |
|-----------------------------------|--------------------|--------------|--------|--------|
| TIGTKPVAHIDQFTADMLGSAELAEVNLNGSGK | 3515.9             | 3            | 3.9876 | 0.1974 |
| TIGVITKLDLMDEGTDARDVLENK          | 2648.0             | 3            | 4.4452 | 0.3266 |
| TIHSYQQQIISHEK                    | 1641.8             | 2            | 4.3638 | 0.4142 |
| TIHSYQQQIISHEKK                   | 1770.0             | 2            | 4.6463 | 0.3487 |
| TIIGSFNGALAAVPVQDLGSTVIK          | 2372.7             | 2            | 4.3054 | 0.3874 |
| TIIGSFNGALAAVPVQDLGSTVIKEVLKR     | 2998.5             | 3            | 4.8838 | 0.3902 |
| TIISYIDEQFER                      | 1514.7             | 2            | 3.5298 | 0.2809 |
| TIKDLQEEVSNLYNNIR                 | 2050.3             | 2            | 3.8533 | 0.3175 |
| TIKDVFHNHGIIHATTIQPEFASVGSK       | 2836.2             | 3            | 4.707  | 0.3802 |
| TIKVWQLGSSSPNFTLEGHEK             | 2359.6             | 3            | 5.7054 | 0.3649 |
| TILKAPGIILLDEATSALDTSNER          | 2542.9             | 3            | 4.264  | 0.2635 |
| TILKDATLTALDR                     | 1431.7             | 2            | 4.0047 | 0.3798 |
| TILKDATLTALDRGQQQVFK              | 2247.6             | 2            | 5.379  | 0.4778 |
| TILLSTTDPADFAVAEALEK              | 2106.4             | 2            | 3.8647 | 0.2605 |
| TILNHVLHVVK                       | 1273.6             | 2            | 3.5368 | 0.3459 |
| TILSNQTVDIPENV DITLK              | 2114.4             | 2            | 5.5188 | 0.4905 |
| TILSNQTVDIPENV DITLKGR            | 2327.6             | 3            | 4.0132 | 0.3138 |
| TIMKENTELVQK                      | 1434.7             | 2            | 3.3347 | 0.1835 |
| TINEVENQILTR                      | 1430.6             | 2            | 4.0593 | 0.3443 |
| TINLYPLTNYTFGTK                   | 1747.0             | 2            | 3.8816 | 0.2109 |
| TIPGKQQLLIGAYAK                   | 1601.9             | 2            | 2.8329 | 0.1799 |
| TIPIDGNFFTYTR                     | 1545.7             | 1            | 2.8336 | 0.1678 |
| TIPIKYPLKEIVVIHQDPEALKDIK         | 2902.5             | 3            | 5.0783 | 0.3186 |
| TIPSWATLSASQLAR                   | 1602.8             | 2            | 4.6103 | 0.4847 |
| TIPYSDKLFEMVLGPAAYNVPLPK          | 2665.1             | 2            | 4.5596 | 0.4075 |
| TIPYSDKLFEMVLGPAAYNVPLPKK         | 2793.3             | 3            | 4.8867 | 0.3917 |
| TIQDKNKEIER                       | 1374.5             | 2            | 3.0637 | 0.2196 |
| TIQFVDWCPTGFK                     | 1542.8             | 2            | 3.9246 | 0.3698 |
| TIQNSSVSPTSSSSSSSSTGETQTQSSSR     | 2893.9             | 3            | 3.7676 | 0.246  |
| TIQTAESLGVPYEQWK                  | 1851.0             | 2            | 5.0665 | 0.3985 |
| TIQVDNTDAEGR                      | 1319.4             | 2            | 3.7366 | 0.4044 |
| TIRDIIALNPLYR                     | 1558.9             | 3            | 4.2566 | 0.2197 |
| TIRNDN SSR                        | 1063.1             | 2            | 2.5971 | 0.1368 |
| TIRPMDMETIEASVMK                  | 1853.2             | 2            | 4.1108 | 0.418  |
| TIRYDPLIK                         | 1216.5             | 3            | 3.6972 | 0.1604 |
| TISAQNMDILQNPLMIK                 | 1931.3             | 2            | 4.4604 | 0.3081 |



| Peptide Sequence                  | Peptide mass (m/z) | Charge State | Xcorr  | DelCn2 |
|-----------------------------------|--------------------|--------------|--------|--------|
| TISAVGEQLLPTVEHLQLELDQLKSELSSWR   | 3522.0             | 3            | 4.2489 | 0.3427 |
| TISHESGEHSAQGK                    | 1468.5             | 2            | 3.5261 | 0.3735 |
| TISHVIIGLK                        | 1081.3             | 2            | 2.6625 | 0.2507 |
| TISQTSAPVWDESASFLIR               | 2109.3             | 2            | 3.4646 | 0.2789 |
| TISSLEEIVEKQGDTIEYLKR             | 2452.7             | 3            | 3.8526 | 0.3194 |
| TISSLAVVDLIDAIQPGCINYDLVK         | 2749.2             | 3            | 3.297  | 0.1296 |
| TISTSDPAEVLVK                     | 1360.5             | 2            | 2.9355 | 0.2358 |
| TITDVINIGIGGSDLGPLMVTEALKPYSSGGPR | 3330.8             | 3            | 5.329  | 0.4403 |
| TITFEQFQEALEELAK                  | 1898.1             | 3            | 5.409  | 0.4714 |
| TITGFQTHHTTPVLLAHGER              | 2080.3             | 3            | 5.0815 | 0.5151 |
| TITLEVELSDTIDNVK                  | 1791.0             | 2            | 4.1566 | 0.2025 |
| TITLEVELSDTIDNVKAK                | 1990.2             | 2            | 3.6189 | 0.2041 |
| TITLEVEPSDTIENVK                  | 1789.0             | 2            | 5.3666 | 0.4344 |
| TITSAHTSSTSTSLESDESASPGVSDHGR     | 2776.8             | 3            | 6.1506 | 0.4486 |
| TITSSYYR                          | 991.1              | 1            | 2.108  | 0.1174 |
| TITVALADGGRPDNTGR                 | 1714.9             | 2            | 2.8418 | 0.1292 |
| TIVAINKDPEAPIFQVADYGIVADLFK       | 2949.4             | 3            | 6.3863 | 0.5386 |
| TIVEEVQDGKVISSR                   | 1660.9             | 2            | 4.6121 | 0.3703 |
| TIVHESERLEALK                     | 1525.7             | 2            | 3.5153 | 0.3523 |
| TIVITSHPGQIVK                     | 1393.7             | 2            | 4.0231 | 0.3578 |
| TIYAGNALCTVKCDEK                  | 1730.0             | 2            | 3.3257 | 0.2107 |
| TKAGDLRDTGIFLDMHLK                | 2145.5             | 3            | 6.2018 | 0.3623 |
| TKALLADAQLMLDHLK                  | 1782.1             | 3            | 4.9756 | 0.3206 |
| TKAPDDLVPVVK                      | 1353.6             | 2            | 2.7054 | 0.1724 |
| TKAQYEQTLAELHR                    | 1688.9             | 2            | 2.4107 | 0.25   |
| TKDDIIICEIGDVFVK                  | 1710.0             | 2            | 3.1402 | 0.1493 |
| TKDDLEQLTTEIK                     | 1534.7             | 2            | 3.4712 | 0.1531 |
| TKDEIITTTVPEDIMSNRGNLLLLK         | 2818.2             | 3            | 4.5097 | 0.1557 |
| TKDEYLINSQTTEHIVK                 | 2020.2             | 2            | 5.309  | 0.4418 |
| TKDGHEVR                          | 942.0              | 2            | 2.5089 | 0.1702 |
| TKDGVREVFEMATR                    | 1639.9             | 3            | 3.5166 | 0.315  |
| TKDGVVEITGK                       | 1147.3             | 2            | 3.4893 | 0.2766 |
| TKDGVVEITGKHEER                   | 1698.9             | 2            | 4.6925 | 0.4751 |
| TKDGVVEITGKHEERQDEHGYISR          | 2785.0             | 3            | 4.4725 | 0.3852 |
| TKDIEDVFYK                        | 1258.4             | 2            | 4.0228 | 0.311  |
| TKDLPVTEAVFSALVTGHAR              | 2113.4             | 2            | 5.879  | 0.5124 |

| Peptide Sequence              | Peptide mass (m/z) | Charge State | Xcorr  | DelCn2 |
|-------------------------------|--------------------|--------------|--------|--------|
| TKDSGSISLQETR                 | 1422.5             | 2            | 3.291  | 0.2464 |
| TKDSLVLNNITR                  | 1374.6             | 2            | 2.695  | 0.109  |
| TKDVEILHLR                    | 1224.4             | 2            | 2.9272 | 0.2748 |
| TKEAGMQPQLQIR                 | 1500.7             | 2            | 3.8287 | 0.2695 |
| TKEAVLLLKK                    | 1143.4             | 2            | 3.0173 | 0.2534 |
| TKEDEKDDKPIR                  | 1474.6             | 2            | 3.645  | 0.3137 |
| TKEEALELINGYIQK               | 1750.0             | 2            | 4.9015 | 0.3817 |
| TKEELEAEKR                    | 1233.4             | 2            | 3.7958 | 0.1855 |
| TKEELEELMSDIKK                | 1693.9             | 3            | 5.3287 | 0.3489 |
| TKEEVAGTLEAVQTIQSITQALQK      | 2587.9             | 3            | 4.0667 | 0.1246 |
| TKEEVEAAKAAALLAK              | 1643.9             | 2            | 5.016  | 0.397  |
| TKEGVLYVGSK                   | 1181.4             | 2            | 2.6888 | 0.1792 |
| TKEGVVHGVATVAEK               | 1525.7             | 2            | 4.5766 | 0.4634 |
| TKEIEAIHAILR                  | 1394.6             | 2            | 3.6386 | 0.285  |
| TKELTSELKENFIR                | 1708.9             | 2            | 4.3473 | 0.3879 |
| TKENDAHLVEVNLNNIK             | 1952.2             | 3            | 4.285  | 0.2778 |
| TKENILEEFSK                   | 1338.5             | 2            | 3.7    | 0.2258 |
| TKEQASHLGGAVFSGAGNIAAATGLVK   | 2556.9             | 3            | 5.1134 | 0.4293 |
| TKEQIENLLR                    | 1244.4             | 2            | 2.7936 | 0.1003 |
| TKEQILEEFSK                   | 1352.5             | 2            | 3.5003 | 0.1765 |
| TKEQILEEFSKVTEGLTDVILYHQPDDK  | 3277.6             | 3            | 5.3237 | 0.3985 |
| TKETPPTAHLILPEQHMSLAQQK       | 2600.0             | 3            | 3.7578 | 0.1726 |
| TKEVIFSVEDGSVK                | 1538.7             | 2            | 3.2858 | 0.1946 |
| TKEVIQEWNLNINIKR              | 1873.1             | 2            | 4.075  | 0.3363 |
| TKEVYELLDSPGK                 | 1479.7             | 2            | 4.3165 | 0.3301 |
| TKEVYELLDSPGKVLLQSK           | 2148.5             | 3            | 3.8342 | 0.1329 |
| TKEVYELLDSPGKVLLQSKDQITAGNAAR | 3146.5             | 3            | 6.4576 | 0.4206 |
| TKFFGTFFPGNYVK                | 1506.7             | 2            | 3.8062 | 0.3626 |
| TKFSMVLPEVEAALAEIPGVR         | 2258.7             | 2            | 3.2462 | 0.3309 |
| TKGDSDEEVIQDGVR               | 1648.7             | 2            | 4.2581 | 0.2599 |
| TKGEPAPPPGK                   | 1079.2             | 2            | 2.6212 | 0.1934 |
| TKGFHTTIDIGVK                 | 1417.6             | 2            | 4.0165 | 0.367  |
| TKGTSSFGK                     | 913.0              | 1            | 1.9154 | 0.2022 |
| TKGVDEVTVINILNTR              | 1773.0             | 2            | 5.2857 | 0.4264 |
| TKHDVKFPLDSTGSELK             | 1903.1             | 2            | 4.1329 | 0.3388 |
| TKHEEILQNLQK                  | 1481.7             | 2            | 3.2285 | 0.2161 |

| Peptide Sequence                | Peptide mass (m/z) | Charge State | Xcorr  | DelCn2 |
|---------------------------------|--------------------|--------------|--------|--------|
| TKHIEEENLIDEDFQNLK              | 2216.4             | 2            | 5.9155 | 0.4492 |
| TKHKLDVTSVEDYK                  | 1663.9             | 2            | 4.3153 | 0.4241 |
| TKIEGLDIHFIVKPPQLPAGHTPK        | 2775.2             | 3            | 4.9507 | 0.3027 |
| TKIYHPNIDEK                     | 1358.5             | 2            | 2.9435 | 0.1905 |
| TKKDDSHSAEDSEDEKEDHKNVR         | 2700.7             | 3            | 4.0585 | 0.3261 |
| TKKFDELLHLASR                   | 1558.8             | 2            | 3.4629 | 0.3936 |
| TKKQELSEAEQATR                  | 1619.8             | 2            | 4.0437 | 0.3247 |
| TKLDDLALLEDLEKQR                | 1901.2             | 3            | 4.2859 | 0.3432 |
| TKLEAQAYTAYLSGMLR               | 1917.2             | 2            | 5.0444 | 0.4434 |
| TKLEEALSPVLELRNESGGHAVPPGSETHFR | 3488.8             | 3            | 4.6905 | 0.3257 |
| TKLHQLSGSDQLESTAHSR             | 2096.2             | 2            | 6.2748 | 0.4932 |
| TKLLHQTGLSLYSTSHGFYEEEVKK       | 2897.2             | 3            | 5.5139 | 0.4955 |
| TKNALDPMSVLLAR                  | 1529.8             | 2            | 3.9797 | 0.2071 |
| TKNFDKLSFLYLITGNLEK             | 2245.6             | 3            | 4.8369 | 0.3364 |
| TKPADMVIEAYGHGQR                | 1774.0             | 2            | 5.196  | 0.4932 |
| TKPFPWGDGNHTLFHNPVHNPLPTGYEDE   | 3318.6             | 3            | 4.4729 | 0.3072 |
| TKPIWTRNPDDITNEEYGEFYK          | 2717.9             | 3            | 4.8724 | 0.4595 |
| TKPIWTRNPDDITQEEYGEFYK          | 2732.0             | 3            | 4.7656 | 0.385  |
| TKPLATTQPAK                     | 1156.4             | 2            | 3.1571 | 0.3713 |
| TKPQDMISAGGESVAGITAISGKPGDK     | 2616.9             | 3            | 4.3879 | 0.2553 |
| TKPQDMISAGGESVAGITAISGKPGDKKK   | 2873.3             | 3            | 4.8313 | 0.35   |
| TKPSDEEMLFIYGHYK                | 1959.2             | 2            | 5.0383 | 0.3946 |
| TKPVTGNLRPEEALQALTIYEGK         | 2529.9             | 2            | 4.1687 | 0.4296 |
| TKPYIQVDIGGGQTK                 | 1605.8             | 3            | 4.678  | 0.3618 |
| TKQFAPIHAEAPEFMEMSVEQEILVTGIK   | 3275.8             | 3            | 4.8757 | 0.1905 |
| TKQFIDSNPNQPLVILEMESGASAK       | 2719.1             | 3            | 5.2005 | 0.3305 |
| TKQGVAAEAAGK                    | 1060.2             | 2            | 2.6356 | 0.2345 |
| TKQQIEEQR                       | 1160.3             | 2            | 3.1291 | 0.2323 |
| TKQTMHGILER                     | 1314.5             | 2            | 3.5516 | 0.2772 |
| TKSENGLEFTSSGSANTETTK           | 2190.3             | 3            | 3.8311 | 0.381  |
| TKSENGLEFTSSGSANTETTKVTGSLETK   | 3006.2             | 3            | 5.7646 | 0.4338 |
| TKSQGGEPTYNVAVGR                | 1664.8             | 2            | 4.409  | 0.3569 |
| TKSTGGAPTFNVTVTK                | 1609.8             | 2            | 3.9791 | 0.3947 |
| TKTEAQKELLDTELDLHKR             | 2269.5             | 3            | 4.0665 | 0.103  |
| TKTEISEMNR                      | 1209.4             | 2            | 3.3121 | 0.2457 |
| TKTENPLILIDEVDKIGR              | 2055.4             | 3            | 6.1391 | 0.3994 |

| Peptide Sequence                | Peptide mass (m/z) | Charge State | Xcorr  | DelCn2 |
|---------------------------------|--------------------|--------------|--------|--------|
| TKTENSGEALAK                    | 1249.4             | 2            | 3.1061 | 0.2723 |
| TKTETITGFQVDAVPANGQTPIQR        | 2573.8             | 2            | 2.6727 | 0.1088 |
| TKTYSEDNFEELQYFPNFYALLK         | 2862.1             | 3            | 4.5058 | 0.3905 |
| TKVEAFQTTISK                    | 1353.5             | 2            | 3.8754 | 0.304  |
| TKVEATKNETSAPFK                 | 1651.8             | 2            | 4.8927 | 0.4882 |
| TKVEEVNRQQSAQLEQLVKELQLKEDAR    | 3311.7             | 3            | 3.9338 | 0.139  |
| TKVENEGGTIPVESSDIVPTWDGIR       | 2700.9             | 3            | 4.834  | 0.2461 |
| TKVHAELADVLTEAVVDSILAIK         | 2436.8             | 3            | 6.4583 | 0.5263 |
| TKVHAELADVLTEAVVDSILAIKK        | 2565.0             | 3            | 4.1592 | 0.3152 |
| TKVMQEEIFGPILPIVPVK             | 2139.6             | 2            | 3.1383 | 0.3143 |
| TKVMQEEIFGPILPIVPVKNVDEAINFINER | 3555.1             | 3            | 5.1567 | 0.4289 |
| TKYNANKTPDKLQQAALPLLSNAECK      | 2861.3             | 3            | 5.3972 | 0.3855 |
| TKYNLDLTNLNQPLLDVDHTSSR         | 2658.9             | 3            | 3.7535 | 0.1705 |
| TKYWELIYEDSMDLIAK               | 2119.4             | 2            | 5.0815 | 0.5028 |
| TLAAEMQELR                      | 1162.3             | 2            | 2.816  | 0.2169 |
| TLADVLVQEVIKQNMENKFPGLEK        | 2745.2             | 3            | 4.4112 | 0.39   |
| TLAEEQHKNQLLQEELEALQLQLR        | 2876.2             | 3            | 6.0131 | 0.2767 |
| TLAEIAKAELDGTILK                | 1687.0             | 2            | 4.6461 | 0.359  |
| TLAEIAKVELDNMPLR                | 1814.1             | 3            | 5.7225 | 0.3811 |
| TLAEIAKVELDNMPLRGK              | 1999.4             | 3            | 5.2381 | 0.3926 |
| TLAEINANRADAEEEEAATR            | 2046.1             | 3            | 4.5415 | 0.3499 |
| TLAEINANRADAEEEEATRIPA          | 2327.5             | 2            | 4.1763 | 0.2661 |
| TLAESALQLLYTAK                  | 1522.8             | 2            | 4.3053 | 0.3842 |
| TLAFTSVDLTNK                    | 1310.5             | 2            | 4.0107 | 0.4212 |
| TLAFTSVDLTNKATGK                | 1667.9             | 2            | 4.1252 | 0.2973 |
| TLAGDVHIVR                      | 1081.3             | 2            | 3.0032 | 0.3201 |
| TLAGDVHIVRGGDFDENLNYPEQK        | 2631.8             | 3            | 5.1793 | 0.4799 |
| TLAGLPLLVAIKEDEIPVLKDELIHELK    | 3161.7             | 3            | 5.7835 | 0.4669 |
| TLAHFRPIEDNEK                   | 1570.7             | 2            | 3.8858 | 0.2919 |
| TLAIELAPR                       | 984.2              | 2            | 3.5192 | 0.1862 |
| TLAKDEALKR                      | 1145.3             | 2            | 2.4772 | 0.1883 |
| TLALKLQEQEQLLKEGFQK             | 2245.6             | 2            | 3.9414 | 0.3601 |
| TLALLVLAHSSDVLENVFSSTDDKYDVAMNR | 3539.0             | 3            | 4.9041 | 0.3791 |
| TLAMDTILANAR                    | 1290.5             | 2            | 4.0502 | 0.3096 |
| TLAPGLFFSLMASR                  | 1511.8             | 2            | 3.7289 | 0.4281 |
| TLAPLLASLLSPGSVLVLSAR           | 2079.5             | 3            | 5.3372 | 0.3467 |

| Peptide Sequence                  | Peptide mass (m/z) | Charge State | Xcorr  | DelCn2 |
|-----------------------------------|--------------------|--------------|--------|--------|
| TLAQLNPESSLFIIASK                 | 1833.1             | 3            | 5.4731 | 0.4469 |
| TLATDILMGVLKEVVR                  | 1759.1             | 2            | 4.0742 | 0.3168 |
| TLATGYQYSFPELGAALKEIVA            | 2343.7             | 2            | 4.1033 | 0.4186 |
| TLATLSENNMEAK                     | 1422.6             | 2            | 3.983  | 0.4131 |
| TLAVITKLDLMDAGTDAMDVLMGR          | 2552.0             | 3            | 4.1814 | 0.2677 |
| TLAYLLPAIVHINHQPYLER              | 2362.8             | 2            | 4.1479 | 0.317  |
| TLDDGFFPFIILDAINDR                | 2083.3             | 2            | 2.6685 | 0.1434 |
| TLDFDALSVGQR                      | 1322.4             | 2            | 3.5345 | 0.3534 |
| TLDGGLNVIQLETAVGAAIK              | 1984.3             | 3            | 6.0044 | 0.467  |
| TLDGGLNVIQLETAVGAAIKSFENSLGINVPR  | 3298.7             | 3            | 7.1498 | 0.4996 |
| TLDLIDEAYGLDFYILK                 | 2003.3             | 2            | 4.1247 | 0.4036 |
| TLDLPIYVTR                        | 1191.4             | 2            | 3.3802 | 0.1944 |
| TLDNDILLIK                        | 1158.4             | 2            | 4.1722 | 0.3217 |
| TLDSVTELAASEVSQLNTIKEHLEEEIKHHQK  | 3587.9             | 3            | 3.7559 | 0.2198 |
| TLDSWRDEFIQLASPR                  | 1935.1             | 3            | 4.0022 | 0.2218 |
| TLDTFLRSEEEKQHR                   | 1890.0             | 2            | 2.836  | 0.1209 |
| TLDVFNILAR                        | 1275.5             | 2            | 3.879  | 0.2886 |
| TLEAEFNPSPTPEPGEGPR               | 2210.3             | 2            | 5.2446 | 0.4401 |
| TLEDGKKEAAASGLPLMVIIHK            | 2322.8             | 2            | 4.2331 | 0.4104 |
| TLEDIDLGPTEK                      | 1331.5             | 2            | 4.0028 | 0.3497 |
| TLEEAIRSDTSGHFQR                  | 1848.0             | 3            | 3.8897 | 0.3088 |
| TLEEDEEELFK                       | 1382.5             | 2            | 3.6295 | 0.2642 |
| TLEEEAKTHEAQIQEMR                 | 2044.2             | 3            | 5.5842 | 0.4965 |
| TLEEEAKTHEAQIQEMRQK               | 2300.5             | 3            | 4.0786 | 0.2611 |
| TLEEGHDFIQEFPGSPAFAALTSIAQK       | 2906.2             | 3            | 4.9908 | 0.3194 |
| TLEFKPYVIFIKPPSIER                | 2178.6             | 3            | 4.3803 | 0.2276 |
| TLEGELHDLR                        | 1183.3             | 2            | 3.594  | 0.3164 |
| TLEGELHDLRGQVAK                   | 1666.9             | 2            | 4.6085 | 0.3576 |
| TLEGELHDLRGQVAKLEAALGEAK          | 2549.9             | 3            | 6.5677 | 0.5291 |
| TLEGELHDLRGQVAKLEAALGEAKK         | 2678.0             | 3            | 4.5508 | 0.3224 |
| TLEGELHDLRGQVAKLEAALGEAKKQLQDEMLR | 3692.2             | 3            | 5.4316 | 0.3912 |
| TLEGERNQIYIQLSEVDKTKHEELTEHIK     | 3345.7             | 3            | 4.7642 | 0.3182 |
| TLEHLEHTYLPQVSHYR                 | 2124.3             | 3            | 3.3148 | 0.3271 |
| TLEKNQEILDDTAK                    | 1618.8             | 2            | 3.9246 | 0.2982 |
| TLEKNQEILDDTAKNLR                 | 2002.2             | 3            | 4.2269 | 0.2626 |
| TLELQGLINDLQR                     | 1513.7             | 2            | 3.6666 | 0.283  |

| Peptide Sequence                    | Peptide mass (m/z) | Charge State | Xcorr  | DelCn2 |
|-------------------------------------|--------------------|--------------|--------|--------|
| TLENELDELDPDNALLPAGLR               | 2309.5             | 2            | 5.1472 | 0.3883 |
| TLEQHDDIVTHYK                       | 1599.7             | 3            | 3.3141 | 0.2492 |
| TLEQTGHVSSSENKYQDILNEIAKDIR         | 3003.3             | 3            | 6.1949 | 0.4486 |
| TLESNLFDDNIDIFADLTVKPK              | 2509.8             | 2            | 2.7902 | 0.1967 |
| TLESSIQGLR                          | 1104.2             | 2            | 3.0996 | 0.2344 |
| TLESVDPLGGLNTIDILTAIR               | 2212.5             | 3            | 5.55   | 0.518  |
| TLETESHGLDR                         | 1258.3             | 2            | 2.7297 | 0.1797 |
| TLETLLLPTANISDVDPAAHAQHYQDVLYHAK    | 3475.9             | 3            | 3.8615 | 0.2005 |
| TLETVPLER                           | 1058.2             | 2            | 2.9517 | 0.1602 |
| TLEVEIEPGVRDGMIEYFFIGEGEPHVDGEPGDLR | 3741.1             | 3            | 5.1157 | 0.3669 |
| TLFANIVLSGGSTLFK                    | 1669.0             | 2            | 3.7972 | 0.3591 |
| TLFGFLGKIDELR                       | 1509.8             | 2            | 3.7454 | 0.351  |
| TLFGRDLLDDLKSELTGK                  | 2022.3             | 3            | 3.8161 | 0.143  |
| TLFGRDLLDDLKSELTGKFEK               | 2426.8             | 3            | 5.7582 | 0.4896 |
| TLFSFLGEIEELR                       | 1554.8             | 2            | 3.7802 | 0.2996 |
| TLFSNIVLSGGSTLFK                    | 1685.0             | 2            | 5.6487 | 0.4831 |
| TLFSNIVLSGGSTLFKGFDR                | 2217.5             | 2            | 4.3656 | 0.3387 |
| TLFVSGPLPLDIKPR                     | 1556.9             | 2            | 2.7909 | 0.1778 |
| TLGDFAAEYAK                         | 1186.3             | 2            | 2.8615 | 0.1901 |
| TLGGLEMELR                          | 1119.3             | 2            | 2.7953 | 0.3447 |
| TLGHNLLVSELYNQLK                    | 1843.1             | 2            | 2.8938 | 0.191  |
| TLGILGLGR                           | 900.1              | 2            | 2.5003 | 0.1274 |
| TLGKDHPAVAATLNNLAVLYGK              | 2267.6             | 2            | 5.3583 | 0.5158 |
| TLGKDNSK                            | 863.0              | 2            | 2.4956 | 0.1281 |
| TLGLTQHVQACETTVELLFDSVIHLGCKPYLDSQR | 3917.5             | 3            | 3.647  | 0.1914 |
| TLGLYGKQQEAALVDMVNDGVEDLR           | 2851.1             | 2            | 5.226  | 0.461  |
| TLGQLQPDELSPK                       | 1426.6             | 2            | 3.691  | 0.1715 |
| TLGTMIAGDTSGDYR                     | 1558.7             | 2            | 3.0652 | 0.2436 |
| TLHEVSLQESIR                        | 1412.6             | 2            | 2.7423 | 0.3122 |
| TLHEWLQQHGIPGLQGVDR                 | 2286.5             | 2            | 3.2212 | 0.3609 |
| TLHLQTGNLLNWGR                      | 1623.8             | 2            | 4.0526 | 0.4087 |
| TLHNLVIQYASQGR                      | 1600.8             | 2            | 4.4299 | 0.3491 |
| TLHPAVHAGILAR                       | 1356.6             | 2            | 3.0911 | 0.4669 |
| TLHPDLGTDKDKEQWK                    | 1912.1             | 2            | 3.6096 | 0.3616 |
| TLHPDLGTDKDKEQWKEVHK                | 2405.7             | 3            | 3.2346 | 0.237  |
| TLHSDDEGTVLDDSR                     | 1660.7             | 2            | 5.1957 | 0.4649 |

| Peptide Sequence                      | Peptide mass (m/z) | Charge State | Xcorr  | DelCn2 |
|---------------------------------------|--------------------|--------------|--------|--------|
| TLHSTFQPNISQGK                        | 1558.7             | 2            | 3.412  | 0.3629 |
| TLHWDTDPSVLQLHSDSDLGR                 | 2393.6             | 3            | 3.4109 | 0.3478 |
| TLHWDTDPSVLQLHSDSDLGRGPIK             | 2789.1             | 3            | 3.4798 | 0.3264 |
| TLIEFLLR                              | 1005.2             | 2            | 3.0612 | 0.2144 |
| TLIEKTNEER                            | 1233.4             | 2            | 3.2313 | 0.2706 |
| TLIEKTNEERK                           | 1361.5             | 2            | 2.6955 | 0.1062 |
| TLIENGEKITSLHR                        | 1611.8             | 2            | 2.9191 | 0.2    |
| TLIGHVPDQR                            | 1136.3             | 2            | 2.854  | 0.2965 |
| TLIGHVPDQREIISFGSGYGGNSLLGK           | 2817.1             | 3            | 5.4532 | 0.4232 |
| TLIGHVPDQREIISFGSGYGGNSLLGKK          | 2945.3             | 3            | 4.707  | 0.4342 |
| TLINAEDPPMVVVR                        | 1554.8             | 2            | 4.1604 | 0.4763 |
| TLKELGLVDGQELAVADVTTTPQTVLFLK         | 2887.3             | 3            | 4.4174 | 0.2701 |
| TLKGHTDSVQDISFDHSGK                   | 2073.2             | 2            | 5.0001 | 0.4213 |
| TLKIQDVGLVPMGGVMSGAVPAAAAQEAVEEDIPIAK | 3678.3             | 3            | 6.1303 | 0.4283 |
| TLKKDEDIPLFPVQTK                      | 1873.2             | 2            | 3.1475 | 0.1679 |
| TLKLTTPTYGDLNHLVSATMSGVTTCLR          | 2995.5             | 3            | 6.2774 | 0.4728 |
| TLLEEKVKLEEQLKETVEK                   | 2287.6             | 3            | 4.0377 | 0.2691 |
| TLLEGPDPAELLLMGSYLKPGPPQPAPAPEGQDLR   | 3727.2             | 3            | 3.6876 | 0.2332 |
| TLLEGSGLESIIIIHSSLAEPK                | 2423.7             | 2            | 4.9142 | 0.3688 |
| TLLEKELQEVIALTSQELEESREK              | 2817.1             | 3            | 4.379  | 0.2918 |
| TLENTAITIGR                           | 1302.5             | 2            | 3.6237 | 0.2729 |
| TLLFTFNVPGSGNTYPK                     | 1857.1             | 2            | 3.9266 | 0.4514 |
| TLLHHAVSTGSK                          | 1251.4             | 2            | 3.1011 | 0.3619 |
| TLLLNIFQDTK                           | 1306.5             | 2            | 4.0067 | 0.3092 |
| TLLPHDPTADVFTPAEEKPIEIQWVKPEPK        | 3527.0             | 3            | 3.3319 | 0.1725 |
| TLLPLLESSTESVAEISSNSLER               | 2589.9             | 3            | 4.9893 | 0.4568 |
| TLLQKPHVDITDPEKPHQPK                  | 2322.6             | 3            | 5.3415 | 0.4311 |
| TLLSDPTYRELIEQLR                      | 1948.2             | 3            | 3.3834 | 0.1959 |
| TLLSNLEEAK                            | 1118.3             | 2            | 3.1382 | 0.2437 |
| TLLSNLEEAKK                           | 1246.4             | 2            | 3.3581 | 0.2027 |
| TLLVADPR                              | 885.0              | 2            | 2.6371 | 0.2027 |
| TLLWTELFK                             | 1179.4             | 2            | 3.3567 | 0.2967 |
| TLMAQSIYGGR                           | 1197.4             | 2            | 2.7909 | 0.3279 |
| TMELLNQMDGFDLHR                       | 2035.3             | 2            | 5.1594 | 0.4327 |
| TLMNLGGLAVAR                          | 1216.5             | 2            | 4.1765 | 0.3192 |
| TLMNLGGLAVARDDGLFSGDPNWFPK            | 2793.1             | 3            | 6.3647 | 0.4215 |

| Peptide Sequence                        | Peptide mass (m/z) | Charge State | Xcorr  | DelCn2 |
|-----------------------------------------|--------------------|--------------|--------|--------|
| TLMNLGGLAVARDDGLFSGDPNWFPPK             | 2921.3             | 3            | 3.2262 | 0.2016 |
| TLMNTIMQLR                              | 1221.5             | 2            | 2.6703 | 0.2638 |
| TLNAGAYSK                               | 925.0              | 2            | 2.6607 | 0.1309 |
| TLNDELEIIIEGMK                          | 1505.7             | 2            | 4.5899 | 0.4404 |
| TLNDELEIIIEGMKFDR                       | 1924.2             | 2            | 4.5718 | 0.3837 |
| TLNDKTENQK                              | 1191.3             | 2            | 3.0413 | 0.2488 |
| TLNEEKRKEEESKFEEMK                      | 2285.5             | 3            | 4.2965 | 0.2142 |
| TLNETELTELQSQISDTSVVLSMDNSR             | 3012.3             | 3            | 5.5687 | 0.429  |
| TLNEWSSQINPDLVR                         | 1772.9             | 2            | 4.6084 | 0.2765 |
| TLNKNVFTSAEELER                         | 1751.9             | 2            | 3.2973 | 0.2626 |
| TLNLAGNLLLESLSGLHK                      | 1781.0             | 2            | 4.437  | 0.3583 |
| TLNMDMFTWEPR                            | 1541.8             | 2            | 4.0212 | 0.363  |
| TLNMTTSPEEK                             | 1251.4             | 2            | 2.9448 | 0.2486 |
| TLNQLGTPQDSPELR                         | 1669.8             | 2            | 4.1906 | 0.31   |
| TLNQPDSQLQLTTGNGLFLSEGLK                | 2575.9             | 2            | 5.3515 | 0.4503 |
| TLNQPDSQLQLTTGNGLFLSEGLKLVDFLEDVKK      | 3891.4             | 3            | 3.7524 | 0.2532 |
| TLNQQLTNHIR                             | 1338.5             | 2            | 3.2378 | 0.3246 |
| TLNVESNFISGAGILR                        | 1691.9             | 2            | 4.6769 | 0.3888 |
| TLPDEVLTKEVEELILTESK                    | 2287.6             | 3            | 3.5939 | 0.2062 |
| TLPETLDPAEYNISPETR                      | 2047.2             | 2            | 4.3656 | 0.4463 |
| TLPEYTYRPFLLDPSISPEFVVASEQFFSTMVPPGVYMR | 4458.1             | 3            | 4.5717 | 0.4098 |
| TLPLTGSTFHDQIAMLISHR                    | 2126.4             | 2            | 5.0035 | 0.4209 |
| TLPQAEALDR                              | 1114.2             | 2            | 2.4275 | 0.3467 |
| TLPQAEALDRAYQIDTVINLNVPFVIVK            | 3172.6             | 3            | 3.4417 | 0.1067 |
| TLPQAEALDRAYQIDTVINLNVPFVIVKQR          | 3456.9             | 3            | 5.0707 | 0.2349 |
| TLPTLQELHLSDNLLGDAGLQLLCEGLLDPPQCR      | 3591.1             | 3            | 6.7858 | 0.3513 |
| TLPTLQELHLSDNLLGDAGLQLLCEGLLDPPQCRLEK   | 3961.6             | 3            | 5.1308 | 0.3039 |
| TLPYLVSNIIVLDDVDPNDQEEDGANIDLDSQR       | 3701.9             | 3            | 3.8133 | 0.1319 |
| TLPYLVSNIIVLDDVDPNDQEEDGANIDLDSQRK      | 3830.1             | 3            | 4.4606 | 0.3341 |
| TLQALEFHTVPPFQLLAR                      | 1985.3             | 2            | 6.0477 | 0.3907 |
| TLQALQIPAAK                             | 1154.4             | 2            | 3.4108 | 0.3587 |
| TLQALQIPAAKLEGVLAQHYQDTLIR              | 3191.7             | 3            | 6.0377 | 0.4625 |
| TLQEDLVKDVLSNAHIQNELER                  | 2565.8             | 3            | 5.3106 | 0.3806 |
| TLQEEVMEAMGIK                           | 1479.7             | 2            | 3.4799 | 0.225  |
| TLQELEELQNDSEIDQLALESPEVQDLQLER         | 3698.0             | 3            | 3.7335 | 0.1655 |
| TLQEQLENGPNLTLAR                        | 1813.0             | 2            | 5.4484 | 0.3652 |



| Peptide Sequence                        | Peptide mass (m/z) | Charge State | Xcorr  | DelCn2 |
|-----------------------------------------|--------------------|--------------|--------|--------|
| TLQEQSGAMNIR                            | 1348.5             | 2            | 3.0764 | 0.1823 |
| TLQEVLTMEYR                             | 1383.6             | 2            | 3.1435 | 0.1879 |
| TLQEVTLQSQAQR                           | 1631.8             | 3            | 4.7688 | 0.297  |
| TLQEVTLQSQAQRIVEKLEK                    | 2471.8             | 3            | 3.5601 | 0.202  |
| TLQGLEIELQSLSMK                         | 1819.1             | 2            | 5.9944 | 0.4238 |
| TLQGTVSQAQER                            | 1318.4             | 2            | 3.7496 | 0.3623 |
| TLQIFNIEMK                              | 1237.5             | 2            | 3.5253 | 0.2151 |
| TLQKLDEYLN SPLPDEIDENS MEDIKFSTR        | 3542.9             | 3            | 5.9565 | 0.3693 |
| TLQLALDLVSSR                            | 1316.5             | 2            | 3.6355 | 0.2632 |
| TLQNTPSLHSR                             | 1254.4             | 2            | 3.0612 | 0.2449 |
| TLQNTSSEGSR                             | 1180.2             | 2            | 2.9699 | 0.1571 |
| TLQQNAESRFN                             | 1308.4             | 2            | 3.0822 | 0.2923 |
| TLQTEQEANTEGQKK                         | 1705.8             | 2            | 4.7837 | 0.3653 |
| TLQYKLLLEPVLLLGER                       | 2014.4             | 3            | 5.4896 | 0.3929 |
| TLRDIETFYNTSIEEMPLNVADLI                | 2799.1             | 2            | 3.9319 | 0.2998 |
| TLREQGVEEHETLLLR                        | 1924.1             | 3            | 4.2974 | 0.36   |
| TLRKDQVELVENMVTVGK                      | 2060.4             | 2            | 2.4176 | 0.1838 |
| TLRLAGTQPLEVLEAVQR                      | 1995.3             | 3            | 4.348  | 0.3024 |
| TLRVEEVEDAISQTSQTLQLLIEHDPVSQR          | 3436.8             | 3            | 3.5286 | 0.1883 |
| TLSAISSSTDPTS YDGF GPFMPGFDIIPYNDLPALER | 3994.4             | 3            | 3.3409 | 0.1587 |
| TLSDYNIQK                               | 1082.2             | 2            | 2.4322 | 0.155  |
| TLSDYNIQKESTLHLVLR                      | 2131.4             | 3            | 5.193  | 0.3298 |
| TLSEKETEAR                              | 1164.2             | 2            | 3.5064 | 0.2136 |
| TLSFGSDLNYATR                           | 1445.6             | 2            | 3.3616 | 0.4842 |
| TLSFGSDLNYATREDAPIGPHLQSMPSQIR          | 3432.8             | 3            | 5.2465 | 0.3657 |
| TLSGFSSTSVLPHTGYIYHSDIVQSLPPDLR         | 3389.8             | 3            | 3.8801 | 0.3532 |
| TLSGFSSTSVLPHTGYIYHSDIVQSLPPDLRR        | 3545.9             | 3            | 4.6986 | 0.4363 |
| TLSGTPEESKR                             | 1205.3             | 2            | 2.5239 | 0.1349 |
| TLSGTPEVHSNKR                           | 1426.6             | 2            | 2.8944 | 0.3405 |
| TLSHPQQMALLDQTK                         | 1712.0             | 2            | 4.2037 | 0.38   |
| TLSKDDVNYK                              | 1183.3             | 2            | 3.1077 | 0.224  |
| TLSKEEETK                               | 1065.2             | 2            | 2.9268 | 0.208  |
| TLSKEEETKK                              | 1193.3             | 2            | 3.2263 | 0.2435 |
| TLSLDEVYLIDSGAQYKDGTTDVTR               | 2762.0             | 3            | 4.8945 | 0.4159 |
| TLSSPTEPVKR                             | 1215.4             | 2            | 2.7628 | 0.2223 |
| TLSSSTQASIEIDSLYEGIDFYTSITR             | 2999.2             | 2            | 2.8697 | 0.2627 |

| Peptide Sequence                       | Peptide mass (m/z) | Charge State | Xcorr  | DelCn2 |
|----------------------------------------|--------------------|--------------|--------|--------|
| TLSSVQNEVQEALQR                        | 1702.8             | 3            | 4.5949 | 0.2351 |
| TLSTIATSTDAASVVHSTDLVVEAIVENLK         | 3086.4             | 3            | 7.1498 | 0.6093 |
| TLSTIATSTDAASVVHSTDLVVEAIVENLKVK       | 3313.7             | 3            | 6.2598 | 0.5411 |
| TLSTIATSTDAASVVHSTDLVVEAIVENLKVKNELFK  | 3945.5             | 3            | 5.3282 | 0.433  |
| TLSTIATSTDAASVVHSTDLVVEAIVENLKVKNELFKR | 4101.7             | 3            | 3.2222 | 0.201  |
| TLSYLLPAIVHINHQPFLER                   | 2362.8             | 2            | 4.2772 | 0.4115 |
| LTAAAVSGAQPILSK                        | 1528.8             | 2            | 4.1895 | 0.305  |
| LTAAAVSGAQPILSKLEPQIASASEYahr          | 3082.5             | 3            | 5.908  | 0.4463 |
| LTAAVILTNFHDGRPLPIER                   | 2448.8             | 3            | 3.9437 | 0.4083 |
| TLTAVHDAILEDLVFPSEIVGK                 | 2368.7             | 3            | 5.3956 | 0.5616 |
| TLTAVHDAILEDLVFPSEIVGKR                | 2524.9             | 3            | 6.5927 | 0.5448 |
| TLTEGDSPGSQ                            | 1092.1             | 2            | 2.4442 | 0.249  |
| TLTEINIAFLPYESQVYSLDSADSFQSFYSPHK      | 3800.1             | 3            | 4.2919 | 0.1723 |
| TLTELILDAQEHVK                         | 1610.8             | 2            | 3.687  | 0.3653 |
| TLTGKEIEIDIEPTDKVER                    | 2187.4             | 2            | 5.6048 | 0.3467 |
| TLTGKTITLEVEPSDTIENVKAK                | 2488.8             | 3            | 5.5124 | 0.3386 |
| TLTGLINVGSIDCQQYHSFCAQENVQRYPEIR       | 3685.1             | 3            | 4.0372 | 0.2148 |
| TLTGTAALTVQSQEDNLR                     | 1919.1             | 3            | 4.8149 | 0.4195 |
| TLTGTVIDSGDGVTHVIPVAEGYVIGSCIK         | 3003.4             | 3            | 4.9275 | 0.3881 |
| TLTIVDTGIGMTK                          | 1350.6             | 2            | 4.6827 | 0.4452 |
| TLTIVDTGIGMTKADLNNLGTIAK               | 2575.0             | 3            | 6.729  | 0.451  |
| TLTLVDTGIGMTK                          | 1350.6             | 2            | 4.4896 | 0.4578 |
| TLTLVDTGIGMTKADLNNLGTIAK               | 2575.0             | 3            | 7.2696 | 0.5016 |
| TLTLVDTGIGMTKADLNNLGTIAKSGTK           | 2948.4             | 3            | 3.7446 | 0.2651 |
| TLTPAGDLQETFSGMDQVR                    | 2067.3             | 2            | 4.2219 | 0.3778 |
| TLTPIIQEYFEHGDTNEVAEMLRDLNLGEMK        | 3609.0             | 3            | 3.8843 | 0.3223 |
| TLTPISAAYAR                            | 1164.3             | 2            | 2.518  | 0.3083 |
| TLTSDVANLANEKEELNNKLKDVQEQLSR          | 3301.6             | 3            | 4.0847 | 0.2621 |
| TLTTVQGIADDYDK                         | 1540.7             | 2            | 3.3082 | 0.3015 |
| TLTTVQGIADDYDKKK                       | 1797.0             | 2            | 3.9799 | 0.2933 |
| TLVDIAKSQDAEVDGTTSVTLAAEFLK            | 2994.3             | 3            | 4.1863 | 0.3309 |
| TLVGKNFEQVAFDETKNVFK                   | 2414.7             | 3            | 5.4655 | 0.5681 |
| TLVGVGASLGLR                           | 1143.4             | 2            | 3.2865 | 0.276  |
| TLVLIGAQQVGR                           | 1184.4             | 2            | 3.1289 | 0.2989 |
| TLVLLDNLNVR                            | 1270.5             | 2            | 3.6758 | 0.3132 |
| TLVLLGAHGVGR                           | 1193.4             | 2            | 2.9548 | 0.2577 |

| Peptide Sequence                 | Peptide mass (m/z) | Charge State | Xcorr  | DelCn2 |
|----------------------------------|--------------------|--------------|--------|--------|
| TLVLLMGK                         | 875.2              | 2            | 2.7543 | 0.1739 |
| TLVLSNLSYSATEETLQEVFEK           | 2502.8             | 3            | 5.8242 | 0.5197 |
| TLVNKEEPKELPAAEPVLSPLEGTK        | 2788.2             | 3            | 4.6502 | 0.4011 |
| TLVNPANVTFK                      | 1204.4             | 2            | 2.7564 | 0.2082 |
| TLVQQQLKEQNEALNR                 | 1785.0             | 3            | 3.5237 | 0.2148 |
| TLVSTVGSMVFNEGEAQR               | 1926.1             | 3            | 5.4363 | 0.4298 |
| TLVSVTKEGLELPEDEEEKKKQEEK        | 2917.2             | 3            | 6.7958 | 0.3568 |
| TLVSVTKEGLELPEDEEEKKKQEEKK       | 3045.4             | 3            | 4.7938 | 0.2801 |
| TLVTLGKEDLSIK                    | 1417.7             | 2            | 2.8971 | 0.2206 |
| TLVTQNSGVEALIHAILR               | 1936.2             | 2            | 4.8361 | 0.4646 |
| TLVVHEKADDLGK                    | 1425.6             | 2            | 4.2192 | 0.4136 |
| TLVVHEKADDLGKGGNEESTK            | 2228.4             | 2            | 6.3037 | 0.4328 |
| TLVVHEKADDLGKGGNEESTKTGNAGSR     | 2872.1             | 3            | 6.8625 | 0.4277 |
| TLVWSEKEQVEK                     | 1476.7             | 2            | 3.3625 | 0.209  |
| TLWTVLDAIDQMWLPPVVR              | 2157.6             | 3            | 5.7317 | 0.3495 |
| TLYGFGG                          | 714.8              | 1            | 1.9449 | 0.2707 |
| TLYLQSVTSIEER                    | 1539.7             | 2            | 3.8532 | 0.412  |
| TLYNNQPIDFLK                     | 1466.7             | 2            | 2.836  | 0.2209 |
| TLYNNQPIDFLKK                    | 1594.8             | 2            | 3.7285 | 0.2694 |
| TLYVEEVVFNVIEPSFGLGR             | 2219.5             | 3            | 5.0732 | 0.3988 |
| TLYVGNLSR                        | 1023.2             | 2            | 2.7613 | 0.2376 |
| TLYVHWTDAGQLTPALLHSR             | 2280.6             | 3            | 4.6604 | 0.1339 |
| TMADSSYNLEVQNILSFLK              | 2174.5             | 2            | 4.5122 | 0.3414 |
| TMATMGDTLASR                     | 1255.4             | 2            | 2.6383 | 0.3376 |
| TMAVLQIEAEKAEELR                 | 1703.0             | 2            | 4.2374 | 0.4027 |
| TMDASER                          | 809.9              | 1            | 1.8138 | 0.16   |
| TMGYSVTAPEDTRR                   | 1584.7             | 2            | 2.6828 | 0.1314 |
| TMIELSDNENPWTIFLETVDPELAASGATLPK | 3504.9             | 3            | 3.9261 | 0.2527 |
| TMIQQQGGSIIVNVSIVGLK             | 2030.4             | 2            | 4.7745 | 0.3199 |
| TMIQSPSGVILQEAAADVHAR            | 2124.4             | 3            | 3.4409 | 0.2167 |
| TMKHTTDL DASK                    | 1348.5             | 2            | 3.1009 | 0.3559 |
| TMLDSLWAAGQELQAWK                | 1949.2             | 2            | 4.1197 | 0.3737 |
| TMLDSLWAAGQELQAWKSPGADLLQVLTK    | 3172.6             | 3            | 6.1321 | 0.3784 |
| TMLEDLGMDDEGDDDPVPLPNVNAAILK     | 2999.3             | 3            | 3.7123 | 0.1186 |
| TMLEDLGMDDEGDDDPVPLPNVNAAILKK    | 3127.5             | 3            | 4.0201 | 0.3869 |
| TMLELINQLDGF DPR                 | 1763.0             | 2            | 3.8389 | 0.3764 |

| Peptide Sequence                       | Peptide mass (m/z) | Charge State | Xcorr  | DelCn2 |
|----------------------------------------|--------------------|--------------|--------|--------|
| TMLELLNQLDGFDSR                        | 1753.0             | 2            | 5.046  | 0.4444 |
| TMLELLNQLDGFDSRGDVK                    | 2152.4             | 2            | 4.2965 | 0.3068 |
| TMLELLNQLDGFEEK                        | 1824.1             | 2            | 5.4521 | 0.442  |
| TMLELLNQLDGFEEKK                       | 2179.5             | 2            | 3.3139 | 0.2001 |
| TMLELLNQLDGFQPNQVK                     | 2190.5             | 2            | 5.7884 | 0.3335 |
| TMLESAGGLIQTAR                         | 1448.7             | 2            | 4.7922 | 0.2756 |
| TMLITHMQDLQEVTDLHYENFR                 | 2864.2             | 3            | 5.7648 | 0.5169 |
| TMNISPEQPQH                            | 1282.4             | 2            | 3.063  | 0.1753 |
| TMNIYFPKKEAVTFDQANPTQILGK              | 2856.3             | 3            | 5.0614 | 0.3849 |
| TMQGSEVVNVLK                           | 1305.5             | 2            | 3.5289 | 0.1854 |
| TMQNTNDVETAR                           | 1380.5             | 2            | 3.5297 | 0.246  |
| TMQNTSDLDTAR                           | 1353.4             | 2            | 3.4499 | 0.2919 |
| TMQTLLSLVR                             | 1162.4             | 2            | 2.7819 | 0.2285 |
| TMSEVGGSVEDLIAK                        | 1536.7             | 2            | 3.5663 | 0.3684 |
| TMSEVGGSVEDLIAKGPVSK                   | 2005.3             | 2            | 4.4185 | 0.4758 |
| TMSIVSYNHLGNNDGENLSAPLQFR              | 2779.0             | 3            | 5.0438 | 0.3701 |
| TMTQKDVEDMFSR                          | 1588.8             | 2            | 3.9976 | 0.3691 |
| TMVGFQPEDDHFVAELTYNYGVGDYK             | 2926.2             | 3            | 4.5621 | 0.4084 |
| TMYVLPFSMGPVGSPLSR                     | 1940.3             | 2            | 5.7066 | 0.5677 |
| TNADTDGMVK                             | 1052.1             | 2            | 2.5345 | 0.3409 |
| TNADTDGMVKILGQK                        | 1591.8             | 2            | 3.1488 | 0.2508 |
| TNANAECTDEEEKEDR                       | 1879.9             | 2            | 4.4738 | 0.377  |
| TNDPFIQEVALVTLGNNAAYSFNQNAIR           | 3082.4             | 3            | 5.5357 | 0.29   |
| TNDPFIQEVALVTLGNNAAYSFNQNAIRELGGVPIIAK | 4060.6             | 3            | 4.0123 | 0.2209 |
| TNEAQAIETAR                            | 1204.3             | 1            | 4.0986 | 0.3388 |
| TNEERKTLLSNLEEAK                       | 1876.1             | 3            | 3.3401 | 0.2279 |
| TNEGVIEFR                              | 1065.2             | 2            | 3.0737 | 0.3076 |
| TNEIVEEQYTPQSLATLESVFQELGK             | 2955.2             | 3            | 7.184  | 0.5847 |
| TNEIVEEQYTPQSLATLESVFQELGKLTGPNNQKR    | 3964.3             | 3            | 5.2815 | 0.386  |
| TNEKVELQELNDR                          | 1588.7             | 2            | 4.3813 | 0.341  |
| TNEKVELQELNDRFANYIDKVR                 | 2696.0             | 3            | 4.5087 | 0.434  |
| TNENKYQGRDDEASNLVGEEK                  | 2397.5             | 3            | 4.0802 | 0.3394 |
| TNEQMHQLVAAYK                          | 1533.7             | 2            | 4.1603 | 0.449  |
| TNEQMHQLVAAYKDAYER                     | 2168.4             | 3            | 5.1478 | 0.4446 |
| TNEQMHQLVAAYKDAYERDLEADIIGDTSGHFQK     | 3896.2             | 3            | 5.531  | 0.4752 |
| TNFDNDIALVR                            | 1278.4             | 2            | 2.9075 | 0.2245 |



| Peptide Sequence                    | Peptide mass (m/z) | Charge State | Xcorr  | DelCn2 |
|-------------------------------------|--------------------|--------------|--------|--------|
| TNVLGHLQQGGAPTPFDR                  | 1909.1             | 2            | 4.15   | 0.4024 |
| TNVLGHLQQGGAPTPFDRNYGTK             | 2472.7             | 3            | 3.3337 | 0.2075 |
| TNVLVELAQYASEPSEQELLR               | 2454.7             | 3            | 4.906  | 0.4509 |
| TNVLVELAQYASEPSEQELLRK              | 2582.8             | 3            | 5.4801 | 0.3899 |
| TNVNGGAIALGHPLGGSGSR                | 1836.0             | 2            | 5.2546 | 0.5432 |
| TNVVTMPTAHR                         | 1324.5             | 2            | 3.6476 | 0.3207 |
| TPAAAAAMNLSR                        | 1342.6             | 2            | 3.1689 | 0.3136 |
| TPAFAESVTEGDVR                      | 1479.6             | 2            | 4.1062 | 0.3966 |
| TPAGNFVTLEEGKGDLEEYGQDLLHTVFK       | 3209.5             | 3            | 6.951  | 0.5727 |
| TPAGNFVTLEEGKGDLEEYGQDLLHTVFKNGK    | 3508.8             | 3            | 5.529  | 0.4416 |
| TPAGNFVTLEEGKGDLEEYGQDLLHTVFKNGKVTK | 3837.2             | 3            | 4.0829 | 0.2563 |
| TPAIPFASYGLHHTSLLKR                 | 2110.4             | 2            | 3.0837 | 0.2488 |
| TPALIALR                            | 855.1              | 2            | 2.5731 | 0.2062 |
| TPALIVYGDQDPMGQTSFEHLK              | 2448.7             | 3            | 5.3987 | 0.3613 |
| TPALIVYGDQDPMGQTSFEHLKQLPNHR        | 3194.6             | 3            | 5.0556 | 0.3619 |
| TPALVFEHVNNTDFK                     | 1732.9             | 2            | 2.4991 | 0.2189 |
| TPALVNAAVTYSKPR                     | 1588.8             | 2            | 4.4107 | 0.4495 |
| TPANEKVEIQK                         | 1257.4             | 2            | 3.2155 | 0.246  |
| TPAQFDADELK                         | 1263.3             | 2            | 3.5325 | 0.3432 |
| TPAQFDADELRAAMK                     | 1664.9             | 2            | 3.6483 | 0.3691 |
| TPAQYDASELK                         | 1223.3             | 2            | 3.8869 | 0.495  |
| TPAQYDASELKASMK                     | 1640.8             | 2            | 4.6862 | 0.4506 |
| TPASPVVHIR                          | 1077.3             | 2            | 2.5094 | 0.2123 |
| TPAVEGLTEAEEEEELRAELTKVEEEIVTLR     | 3385.7             | 3            | 6.643  | 0.5546 |
| TPDFESTGLYSAMPR                     | 1672.8             | 2            | 4.4802 | 0.5047 |
| TPDGFDSVPLKTSSGGDLMDL               | 2153.4             | 2            | 4.3504 | 0.3792 |
| TPDGGHSSQEIK                        | 1256.3             | 2            | 2.7055 | 0.2458 |
| TPDGNKSPAPKPSDLRPGDVSSK             | 2351.6             | 3            | 3.7882 | 0.2306 |
| TPDGTENGDFLALDLGGTNFR               | 2211.3             | 2            | 3.2299 | 0.4212 |
| TPDKVNHAVLAVGYGEK                   | 1799.0             | 2            | 5.3375 | 0.4987 |
| TPDRVSEADIQR                        | 1387.5             | 3            | 4.4512 | 0.3248 |
| TPDSGHVSQEPK                        | 1282.3             | 2            | 2.9973 | 0.2643 |
| TPDVLKK                             | 801.0              | 2            | 2.5294 | 0.1158 |
| TPEAPAHSEKPR                        | 1320.4             | 2            | 3.219  | 0.2969 |
| TPEASPEPK                           | 956.0              | 2            | 3.1153 | 0.2339 |
| TPEEGGYSYDISEK                      | 1575.6             | 2            | 4.0463 | 0.4387 |

| Peptide Sequence                  | Peptide mass (m/z) | Charge State | Xcorr  | DelCn2 |
|-----------------------------------|--------------------|--------------|--------|--------|
| TPEEYPESAK                        | 1151.2             | 2            | 3.0007 | 0.2765 |
| TPEEYPESAKVYEK                    | 1670.8             | 2            | 4.1252 | 0.3467 |
| TPELNLDQFHDK                      | 1457.6             | 2            | 3.9376 | 0.3316 |
| TPELNLDQFHDKTPYTIMFGPDK           | 2709.0             | 3            | 5.3416 | 0.4662 |
| TPESFLGPNAALVDLDSLVSRLGPTPPGAK    | 3005.4             | 3            | 4.3424 | 0.2795 |
| TPETLLPFAEAEAFLLK                 | 1906.2             | 3            | 5.1939 | 0.4437 |
| TPFAGVDDFFIPPTNLIINHIR            | 2498.9             | 3            | 4.1508 | 0.2798 |
| TPFGAYGGLLK                       | 1124.3             | 2            | 3.2546 | 0.3526 |
| TPFGAYGGLLKDFATDLSEFAAK           | 2521.8             | 2            | 6.1537 | 0.4304 |
| TPFGSAKPLDYVEIHKVVK               | 2144.5             | 2            | 2.6912 | 0.1492 |
| TPFHTSLHQGTSK                     | 1441.6             | 2            | 2.6701 | 0.1563 |
| TPFLLSGTSYK                       | 1214.4             | 2            | 3.4371 | 0.216  |
| TPFLLSGTSYKDLMPHDLAR              | 2263.6             | 3            | 5.7086 | 0.4907 |
| TPFLLVGTQIDLR                     | 1473.7             | 2            | 2.7836 | 0.1556 |
| TPFLLVGTQIDLRDDPSTIEK             | 2359.7             | 2            | 4.6016 | 0.32   |
| TPFLLVGTQIDLRDDPSTIEKLAK          | 2672.1             | 3            | 4.9402 | 0.2162 |
| TPGDQILNFTILQIFPFTYESKR           | 2730.1             | 3            | 3.913  | 0.22   |
| TPGKEAVAMESYAK                    | 1482.7             | 2            | 4.3376 | 0.4073 |
| TPGPGAQSALR                       | 1055.2             | 2            | 3.02   | 0.3093 |
| TPGRAGTEALPDGLSVEDILNLLGMESAAANQK | 3269.6             | 3            | 3.5133 | 0.251  |
| TPGTGSLAAAVETASGR                 | 1546.7             | 2            | 4.0231 | 0.254  |
| TPGYVVTPTHMNLK                    | 1672.0             | 2            | 3.8532 | 0.363  |
| TPHYGSQTPLHDGSR                   | 1653.7             | 2            | 2.7482 | 0.4097 |
| TPIAAGHPSMNLLLR                   | 1591.9             | 2            | 3.6907 | 0.3766 |
| TPIATR                            | 658.8              | 1            | 1.7591 | 0.1161 |
| TPIGSFLGSLSLLPATK                 | 1703.0             | 2            | 5.4372 | 0.515  |
| TPIGSFLGSLSLLPATKLGSAIQGAIEK      | 2884.4             | 3            | 4.4712 | 0.2629 |
| TPIKKPGDGR                        | 1069.2             | 2            | 2.4233 | 0.1845 |
| TPIQVLHEYGMK                      | 1416.7             | 2            | 3.1661 | 0.2284 |
| TPKDESANQEEPEAR                   | 1701.7             | 2            | 4.3257 | 0.362  |
| TPKEAIEGTYIDKK                    | 1593.8             | 2            | 4.2656 | 0.1977 |
| TPKEKEEFVAVPENSSVQQFKEEISKR       | 3066.4             | 3            | 4.7063 | 0.3349 |
| TPKGPSSVEDIKAK                    | 1457.7             | 2            | 3.1359 | 0.1152 |
| TPLAVELEVLDGHDPDPGR               | 2031.2             | 3            | 4.5174 | 0.4038 |
| TPLEQEIFNLLHK                     | 1582.8             | 2            | 2.8523 | 0.2288 |
| TPLFDQIIDMLR                      | 1462.7             | 2            | 3.6535 | 0.4013 |

| Peptide Sequence                     | Peptide mass (m/z) | Charge State | Xcorr  | DelCn2 |
|--------------------------------------|--------------------|--------------|--------|--------|
| TPLFDQIIDMLRVEQVK                    | 2046.4             | 2            | 4.0534 | 0.3512 |
| TPLHEIALSIK                          | 1222.5             | 2            | 2.9392 | 0.2362 |
| TPLLLMLGQEDR                         | 1386.6             | 2            | 4.0272 | 0.3806 |
| TPLPSAPVLPeltaIPLTAYGPMAAAAAAAAAVVR  | 3273.9             | 3            | 5.6963 | 0.4242 |
| TPLQGILQLGQELKPK                     | 1764.1             | 3            | 4.9667 | 0.4378 |
| TPLSEAEFEEIMNR                       | 1666.8             | 2            | 4.4109 | 0.3618 |
| TPLVSVLLEGPPHSGK                     | 1631.9             | 2            | 2.9035 | 0.3216 |
| TPLYDFHLAHGGK                        | 1456.6             | 2            | 3.2577 | 0.3194 |
| TPLYLQPDAYGSLDR                      | 1709.9             | 2            | 3.8035 | 0.2873 |
| TPMGIVLDALEQQEEGINR                  | 2114.4             | 2            | 6.3126 | 0.4677 |
| TPMGIVLDALEQQEEGINRLTDYISK           | 2935.3             | 3            | 4.664  | 0.3534 |
| TPMGLLLEALGQEQEAGS                   | 1845.1             | 2            | 3.4244 | 0.3048 |
| TPMTSQK                              | 792.9              | 1            | 1.8806 | 0.1009 |
| TPMTSQKTFESLVDFSK                    | 1947.2             | 3            | 4.8671 | 0.5254 |
| TPQAPASANLVGPR                       | 1379.5             | 2            | 2.7255 | 0.1464 |
| TPQSVTAKQPPEIDKKNEK                  | 2139.4             | 3            | 3.3016 | 0.1705 |
| TPSAAYLWVGTGASEAEK                   | 1839.0             | 2            | 6.1969 | 0.4957 |
| TPSAAYLWVGTGASEAEKTGAQELLR           | 2708.0             | 3            | 6.6929 | 0.4211 |
| TPSALAIENANVLAR                      | 1653.9             | 2            | 5.2854 | 0.3743 |
| TPSDVKELVLDNSR                       | 1573.7             | 2            | 4.2016 | 0.3978 |
| TPSKQPGSIGSR                         | 1215.3             | 2            | 2.8811 | 0.1103 |
| TPSNELYKPLR                          | 1318.5             | 2            | 3.4084 | 0.281  |
| TPSSDVLVFDYTK                        | 1472.6             | 2            | 3.7337 | 0.3906 |
| TPSTMENDSSNLDPSQAPSLAQPLVFSNSK       | 3164.4             | 3            | 4.4651 | 0.2717 |
| TPTAPAVNLAGAR                        | 1239.4             | 2            | 2.7266 | 0.3793 |
| TPTEALASFDYIVR                       | 1583.8             | 2            | 5.2758 | 0.3616 |
| TPTHEMFVGFPTSPVAQPHPSAGLNVDVFESVFGNK | 3744.1             | 3            | 4.3399 | 0.2766 |
| TPTLASTPIPPTPQAPSPAVIDAEIR           | 2528.8             | 3            | 4.1069 | 0.326  |
| TPTPVHYRPHGAK                        | 1461.7             | 2            | 2.8342 | 0.3385 |
| TPTQTNGSNVPFKPR                      | 1644.8             | 2            | 3.5191 | 0.2348 |
| TPTSSGKPSAK                          | 1061.2             | 2            | 2.5597 | 0.2343 |
| TPVEEVPAAIAPFQGR                     | 1682.9             | 2            | 2.8044 | 0.2594 |
| TPVEPEVAIHR                          | 1248.4             | 3            | 4.0826 | 0.2603 |
| TPVGFILGNMGNPMAK                     | 1705.0             | 2            | 4.3572 | 0.4519 |
| TPVIDADKPVSSQLR                      | 1626.8             | 2            | 4.9036 | 0.4658 |
| TPVLFDIYEIK                          | 1338.6             | 2            | 3.2152 | 0.1162 |



| Peptide Sequence                  | Peptide mass (m/z) | Charge State | Xcorr  | DelCn2 |
|-----------------------------------|--------------------|--------------|--------|--------|
| TPVLFDIYEIKEAIK                   | 1780.1             | 2            | 5.0722 | 0.4658 |
| TPVPSDIDISR                       | 1200.3             | 2            | 2.4158 | 0.1437 |
| TPVQMMYLR                         | 1139.4             | 2            | 2.5152 | 0.2215 |
| TPVSEDMLGR                        | 1105.2             | 2            | 3.4595 | 0.357  |
| TPVSITEHPK                        | 1109.3             | 2            | 2.553  | 0.2897 |
| TPVTDPATGAVK                      | 1157.3             | 2            | 3.3094 | 0.3095 |
| TPVTDPATGAVKEK                    | 1414.6             | 3            | 4.4129 | 0.3884 |
| TPVTQVNEVTGTLR                    | 1515.7             | 2            | 2.8227 | 0.31   |
| TPVVTGTGPNFSLGELQGHLAYDLNPASTGLR  | 3284.6             | 3            | 4.4449 | 0.3883 |
| TPVVTGTGPNFSLGELQGHLAYDLNPASTGLRR | 3440.8             | 3            | 3.8294 | 0.3067 |
| TPYHVNLLLAGYDEHEGPALYYMDYLAALAK   | 3514.0             | 3            | 4.5599 | 0.1902 |
| TPYTDVNIVTIR                      | 1392.6             | 2            | 2.8249 | 0.2855 |
| TPYTIMFGPDK                       | 1270.5             | 2            | 2.8375 | 0.2562 |
| TPYTMSYGDSLYYNNAYGALDAYYKR        | 3062.3             | 3            | 4.2644 | 0.4521 |
| TPYTPNSQYQMLLDPTNPSAGTAK          | 2596.9             | 2            | 3.3009 | 0.101  |
| TPYVTTTVAHSAK                     | 1463.6             | 2            | 2.8    | 0.2513 |
| TQADLDSLRECPGIEPVCVDLGDWEATER     | 3318.6             | 3            | 3.934  | 0.1785 |
| TQAPAVATT                         | 859.9              | 1            | 1.7055 | 0.1973 |
| TQAYQDQKPGTSGLR                   | 1650.8             | 3            | 4.2772 | 0.3829 |
| TQDASGPTELILPASIEFR               | 1945.2             | 2            | 4.9043 | 0.4324 |
| TQDGETALQLAIR                     | 1416.6             | 2            | 3.1442 | 0.2056 |
| TQDPAKAPNTPDILEIEFK               | 2128.4             | 3            | 4.6313 | 0.363  |
| TQDPAKAPNTPDILEIEFKK              | 2256.5             | 3            | 4.294  | 0.3059 |
| TQDQDENVALEACEFWLTLAEQPICKDVLVR   | 3579.0             | 3            | 3.9663 | 0.1684 |
| TQDQISNIKYHEEFK                   | 2010.1             | 2            | 5.3996 | 0.4675 |
| TQDQISNIKYHEEFKSR                 | 2253.4             | 2            | 5.0897 | 0.4394 |
| TQDTINRIQDLLAEGTITGVIDDR          | 2658.9             | 3            | 4.289  | 0.2294 |
| TQDTINRIQDLLAEGTITGVIDDRGK        | 2844.1             | 3            | 4.2389 | 0.3479 |
| TQEEGEERAESEQEAYLRED              | 2399.4             | 3            | 4.5088 | 0.2711 |
| TQEEIVAK                          | 918.0              | 2            | 2.5649 | 0.1737 |
| TQEELKELQAER                      | 1474.6             | 2            | 3.4947 | 0.1113 |
| TQEERAQLLQPTLEINPR                | 2137.4             | 3            | 4.5035 | 0.1614 |
| TQEHFTHNTVR                       | 1370.5             | 2            | 2.8689 | 0.2052 |
| TQEHIEESR                         | 1129.2             | 2            | 3.2429 | 0.2777 |
| TQEKEQIKTLNNK                     | 1574.8             | 2            | 4.4242 | 0.1103 |
| TQEKEQIKTLNNKFASFIDK              | 2383.7             | 3            | 5.3869 | 0.1251 |

| Peptide Sequence                     | Peptide mass (m/z) | Charge State | Xcorr  | DelCn2 |
|--------------------------------------|--------------------|--------------|--------|--------|
| TQEKEQIKTLNNKFASFDKVR                | 2639.0             | 3            | 5.4477 | 0.2365 |
| TQEKEQIKTLNNKFASFTDKIR               | 2641.0             | 3            | 4.2542 | 0.2378 |
| TQEQISNVKYHEDFEKTK                   | 2225.4             | 2            | 4.7325 | 0.3694 |
| TQEQLALEMAELTAR                      | 1704.9             | 2            | 3.4575 | 0.1994 |
| TQEQNIQHNLNHSLSHKEQLLQEFR            | 2959.2             | 3            | 6.3638 | 0.4521 |
| TQESGDQDPQEAQK                       | 1561.5             | 2            | 4.6104 | 0.3682 |
| TQETLSQAGQK                          | 1191.3             | 2            | 3.8481 | 0.3251 |
| TQETPSAQMEGFLNR                      | 1709.9             | 2            | 4.0868 | 0.413  |
| TQFGEKIHNFGLIQEK                     | 1890.1             | 2            | 3.5866 | 0.2719 |
| TQGAVEAAK                            | 875.0              | 2            | 2.6474 | 0.1719 |
| TQGAVEAAKVGALASLIR                   | 1756.0             | 3            | 4.1807 | 0.2692 |
| TQGELFLLLSR                          | 1392.6             | 2            | 2.9496 | 0.2095 |
| TQGFLALFSGDTGEIKSEVR                 | 2156.4             | 2            | 4.2068 | 0.3701 |
| TQGTKIASDGLK                         | 1219.4             | 2            | 3.0256 | 0.2275 |
| TQHFVSAK                             | 918.0              | 1            | 2.2439 | 0.1204 |
| TQHHVEALVEHQNGK                      | 1727.9             | 2            | 4.6313 | 0.4595 |
| TQHIQQPR                             | 1008.1             | 2            | 2.6329 | 0.2127 |
| TQIALSPNNHEVHIYK                     | 1865.1             | 2            | 4.8229 | 0.3561 |
| TQIALSPNNHEVHIYKK                    | 1993.3             | 2            | 4.3602 | 0.4547 |
| TQIAPGSQTVLGIGPGPADLIDKVTGHLK        | 2885.3             | 3            | 4.407  | 0.3384 |
| TQIDHYVGIAR                          | 1273.4             | 2            | 3.3772 | 0.3093 |
| TQILAASYELHK                         | 1374.6             | 2            | 3.1968 | 0.1881 |
| TQIQSQESDLKSQEDDLNR                  | 2235.3             | 3            | 3.4238 | 0.2065 |
| TQKEIEQEAAVELSQLRDPQHDLDR            | 2950.2             | 3            | 4.3324 | 0.1683 |
| TQKEIEQEAAVELSQLRDPQHDLDRVK          | 3177.5             | 3            | 4.1797 | 0.129  |
| TQKKAEEVEGKDLPEHAVLK                 | 2121.4             | 3            | 5.8612 | 0.4581 |
| TQKLQQELEAANQSLAELRDQR               | 2570.8             | 3            | 3.6464 | 0.2633 |
| TQKPGESGINIVTADFVELGDFISTVIK         | 2980.4             | 2            | 2.6998 | 0.2319 |
| TQLASWSDPTEETGPVAGILDTETLEKVSITEAMHR | 3915.3             | 3            | 4.3326 | 0.1865 |
| TQLEELEDELQATEDAK                    | 1963.0             | 2            | 6.3832 | 0.5321 |
| TQLEQLPEHIKEPIWETLSEEKESKS           | 3239.5             | 3            | 4.8604 | 0.4071 |
| TQLEWTEAILEDEQTQR                    | 2091.2             | 2            | 6.3417 | 0.4523 |
| TQLKGSELEITLTR                       | 1589.8             | 2            | 3.8327 | 0.3071 |
| TQLLQDVQDENKLFK                      | 1820.0             | 2            | 4.6343 | 0.2811 |
| TQLNDSLKEIHQK                        | 1554.7             | 2            | 3.8514 | 0.3373 |
| TQLPYEYYSLPFCQPSK                    | 2065.3             | 2            | 3.0115 | 0.197  |

| Peptide Sequence                        | Peptide mass (m/z) | Charge State | Xcorr  | DelCn2 |
|-----------------------------------------|--------------------|--------------|--------|--------|
| TQLVSNLKK                               | 1031.2             | 2            | 2.5812 | 0.1265 |
| TQLYDKQREEYQPATPGLGMFVEVKDPEDK          | 3513.9             | 3            | 5.2167 | 0.2955 |
| TQLYDKQREEYQPATPGLGMFVEVKDPEDKVILAR     | 4066.6             | 3            | 5.022  | 0.317  |
| TQLYEYLQNR                              | 1328.5             | 2            | 2.6744 | 0.1595 |
| TQMLDQEELLASTR                          | 1635.8             | 2            | 2.6787 | 0.2218 |
| TQNDVDIADVAYYFEK                        | 1892.0             | 2            | 5.6415 | 0.4625 |
| TQNDVDIADVAYYFEKDVK                     | 2234.4             | 3            | 4.0113 | 0.1794 |
| TQNDVDIADVAYYFEKDVKGESLFHSK             | 3120.4             | 3            | 3.3987 | 0.1601 |
| TQNDVLHAENVK                            | 1368.5             | 2            | 2.7235 | 0.1809 |
| TQNPMVTGTSVLGVK                         | 1532.8             | 2            | 2.9295 | 0.134  |
| TQNVLGEK                                | 889.0              | 1            | 2.1231 | 0.1983 |
| TQPAVATAATAAEK                          | 1330.5             | 2            | 3.012  | 0.359  |
| TQPDGTSVPGEPASISQR                      | 1925.0             | 2            | 3.4436 | 0.3716 |
| TQPHHSTPTK                              | 1134.2             | 2            | 2.4941 | 0.2466 |
| TQPMTAQAASYR                            | 1325.5             | 2            | 2.748  | 0.2348 |
| TQPSSQPLQSGQVLPSTPTPSAPPTSQQELQAK       | 3488.8             | 3            | 5.0403 | 0.4295 |
| TQPVEATDDAFWDQFWADTATSVQDVFALVPAAEIR    | 4013.3             | 3            | 4.4382 | 0.3125 |
| TQPYDVYDQVEFDVPVGSR                     | 2215.4             | 3            | 3.8453 | 0.1839 |
| TQQAQAANITLQEIEAIHK                     | 2236.5             | 3            | 3.7214 | 0.3188 |
| TQQMLHGLQR                              | 1212.4             | 2            | 2.8101 | 0.1416 |
| TQSNLPTSLEGLSNLADVDLSCNDLTRVPECLYTLPSLR | 4250.8             | 3            | 4.9727 | 0.2973 |
| TQSSASLAASYAAQQHPQAAASYR                | 2466.6             | 3            | 4.7825 | 0.4291 |
| TQSSLVPALTDVFR                          | 1534.7             | 2            | 3.6682 | 0.3801 |
| TQSVEITKTDTEGK                          | 1537.7             | 2            | 4.0488 | 0.3121 |
| TQSVEITKTDTEGKIK                        | 1779.0             | 2            | 4.2302 | 0.3721 |
| TQTAIASEDMPNTLTEAEK                     | 2051.2             | 2            | 5.2978 | 0.433  |
| TQTAISVVEEDLK                           | 1433.6             | 2            | 3.9964 | 0.2544 |
| TQTAISVVEEDLKLLQLK                      | 2029.4             | 2            | 4.3199 | 0.381  |
| TQTSDPAMLPTMIGLLAEAGVR                  | 2273.7             | 3            | 5.093  | 0.4091 |
| TQTVTISDNANAVKSEIPTKDVPIVHTETK          | 3238.6             | 3            | 5.8631 | 0.4175 |
| TQVAGGQLSFK                             | 1136.3             | 2            | 2.4115 | 0.2301 |
| TQVYKPPALKK                             | 1273.5             | 2            | 2.517  | 0.2227 |
| TQYACPPFDLTECSFKDGAGNSFDLSSLSR          | 3258.5             | 3            | 4.4366 | 0.4167 |
| TRAEAEAAAVHGAR                          | 1410.5             | 2            | 4.0591 | 0.326  |
| TRDDEPVCGRPLGIR                         | 1684.9             | 3            | 3.2862 | 0.3265 |
| TRDELEVIHLIEEHR                         | 1890.1             | 2            | 4.9952 | 0.3962 |

| Peptide Sequence                     | Peptide mass (m/z) | Charge State | Xcorr  | DelCn2 |
|--------------------------------------|--------------------|--------------|--------|--------|
| TRDMGGYSTTTDFIK                      | 1693.9             | 2            | 4.856  | 0.4189 |
| TREEECHFYAGGQVYPGEASR                | 2387.5             | 3            | 6.0596 | 0.3995 |
| TREEFLTLIR                           | 1278.5             | 2            | 3.1948 | 0.1322 |
| TREEIQEVR                            | 1160.3             | 2            | 3.4687 | 0.1604 |
| TREGNDLYHEMIESGVINLK                 | 2319.6             | 3            | 6.2911 | 0.378  |
| TREGNDLYHEMIESGVINLKDATSK            | 2822.1             | 3            | 7.4636 | 0.4519 |
| TRELETLQQTVHEELQAQVHSMDGAK           | 2843.1             | 3            | 6.7488 | 0.3145 |
| TREYFYVDHQGQLFLDDSK                  | 2525.7             | 3            | 3.3973 | 0.2747 |
| TRFPPEPNGILHIGHAK                    | 1885.2             | 3            | 4.368  | 0.4143 |
| TRFVASKPLEEEEEMVPLPK                 | 2429.8             | 3            | 3.9269 | 0.3394 |
| TRIEGLLAAPFK                         | 1316.6             | 2            | 3.4427 | 0.1615 |
| TRKPLEALYGYDYFAR                     | 1964.2             | 3            | 3.8201 | 0.3073 |
| TRLEEKVEHLEEGPMIEQLSK                | 2496.8             | 3            | 4.0198 | 0.1546 |
| TRLEQEIATYR                          | 1380.5             | 2            | 3.1073 | 0.1803 |
| TRLQQELDDLVDLDHQR                    | 2208.4             | 2            | 3.1689 | 0.3517 |
| TRNEMTAEK                            | 1209.3             | 2            | 2.7179 | 0.1116 |
| TRNTMSLLAANNLLAGLR                   | 1930.3             | 2            | 4.6461 | 0.4182 |
| TRPEVGEMLR                           | 1188.4             | 2            | 2.6494 | 0.2177 |
| TRPLEFAAIGDYLDTFALK                  | 2142.4             | 2            | 2.6174 | 0.2207 |
| TRPLKAENPYLFLR                       | 1719.0             | 2            | 3.2774 | 0.3132 |
| TRPVVAAGAVGLAQR                      | 1466.7             | 2            | 3.8044 | 0.4305 |
| TRQGVDDAFYTLVR                       | 1641.8             | 2            | 3.7673 | 0.2755 |
| TRRDEPTGEVLSLVGKLEGTR                | 2314.6             | 3            | 3.8214 | 0.2378 |
| TRREAEDLQVGQVELGGGPGAGSLQPLALEGSLQ   | 3434.8             | 3            | 6.8006 | 0.4685 |
| TRREAEDLQVGQVELGGGPGAGSLQPLALEGSLQK  | 3562.9             | 3            | 5.7526 | 0.4043 |
| TRRPNVLLLLTDDQDEVLGGMTPKK            | 2910.4             | 3            | 6.1402 | 0.5349 |
| TRTFNTSTGGLLLPSDTKR                  | 2066.3             | 3            | 3.6283 | 0.1005 |
| TRTFYGLHQDFPSVVLVGLGKK               | 2463.9             | 3            | 3.3678 | 0.193  |
| TSAADLVTTDHLVEDLIISLR                | 2541.8             | 3            | 4.4538 | 0.2907 |
| TSAADLVTTDHLVEDLIISLRER              | 2827.1             | 3            | 4.3208 | 0.3093 |
| TSAALSTVGSISR                        | 1321.5             | 2            | 4.2518 | 0.3888 |
| TSADGNEKKIEMVR                       | 1578.8             | 2            | 4.0069 | 0.3173 |
| TSAEAPSHHLQQQQQQQR                   | 2103.2             | 2            | 5.3171 | 0.3719 |
| TSAGHEEGATR                          | 1116.1             | 2            | 3.2042 | 0.38   |
| TSAGSYSSPPPAPYSAPQAPALSVTGPITANSEIAR | 3644.0             | 3            | 6.6751 | 0.4927 |
| TSAGTTDPEEATR                        | 1336.3             | 2            | 2.9427 | 0.3426 |

| Peptide Sequence                               | Peptide mass (m/z) | Charge State | Xcorr  | DelCn2 |
|------------------------------------------------|--------------------|--------------|--------|--------|
| TSAHYEENK                                      | 1079.1             | 2            | 2.5191 | 0.1838 |
| TSAKEEDAFHFVSYVPVNGR                           | 2254.4             | 3            | 3.5111 | 0.2395 |
| TSASIILR                                       | 861.0              | 2            | 3.0274 | 0.1399 |
| TSASPFFLAVGYHKPHIPFR                           | 2273.6             | 2            | 3.0399 | 0.2975 |
| TSATKGTGLDEAMEWLVELTK                          | 2281.6             | 2            | 3.7043 | 0.2035 |
| TSATWLALSR                                     | 1106.3             | 2            | 3.5022 | 0.4034 |
| TSDDEVFKYLAK                                   | 1416.6             | 2            | 2.7985 | 0.2663 |
| TSDIFGSPVTATSR                                 | 1439.6             | 2            | 4.5743 | 0.4055 |
| TSDKIQEYPQMLIEFLK                              | 2084.4             | 2            | 3.504  | 0.202  |
| TSDLIVLGLPWK                                   | 1342.6             | 2            | 3.5417 | 0.2454 |
| TSDSDQQAYLVQR                                  | 1511.6             | 2            | 3.769  | 0.3091 |
| TSDVGGYYEYK                                    | 1282.3             | 2            | 2.6366 | 0.1443 |
| TSDVGGYYEYKIER                                 | 1680.8             | 2            | 3.2693 | 0.2759 |
| TSDVSSYLEGQAAK                                 | 1456.5             | 2            | 4.5801 | 0.4116 |
| TSDVVVAGEFDQGSDEENIQVLK                        | 2480.6             | 2            | 6.4395 | 0.4403 |
| TSEAPKKDEEK                                    | 1262.3             | 2            | 2.6319 | 0.1401 |
| TSEEEKLLVYEALYAKR                              | 2300.6             | 3            | 5.018  | 0.4667 |
| TSEFMPYVVFIAAPELETLR                           | 2314.7             | 2            | 5.1593 | 0.4498 |
| TSEGSAGSAGLGGGGAGAGAGVGAGGGGGSGASSGGGAGGLQPSSR | 3476.5             | 3            | 7.5935 | 0.5311 |
| TSEGVVTNEKGTDSQAMEEEKPEGHV                     | 2690.8             | 3            | 5.8598 | 0.5005 |
| TSEIEGANQLLELFDLFR                             | 2096.3             | 2            | 3.9216 | 0.2349 |
| TSEQKKEPEPKDEVLQK                              | 2142.4             | 3            | 3.7598 | 0.2073 |
| TSESGELHGLTTEEEFVEGIYK                         | 2456.6             | 3            | 6.4834 | 0.4912 |
| TSESGELHGLTTEEEFVEGIYKVEIDTK                   | 3142.4             | 3            | 6.5803 | 0.5676 |
| TSETLSQAGQK                                    | 1150.2             | 2            | 3.9034 | 0.3272 |
| TSEVDLAKPLVK                                   | 1300.5             | 2            | 3.1574 | 0.2813 |
| TSEVQDLQDEVQRENTNLQK                           | 2375.5             | 3            | 4.0169 | 0.3693 |
| TSFFQALGITTK                                   | 1314.5             | 2            | 4.5209 | 0.3909 |
| TSFHALTSILK                                    | 1218.4             | 2            | 2.4204 | 0.2544 |
| TSFIQYLLEQEVPGSR                               | 1868.1             | 3            | 3.6274 | 0.2055 |
| TSFLDDAFRK                                     | 1200.3             | 2            | 2.8794 | 0.2691 |
| TSFQNLIEGFEALLK                                | 1711.0             | 2            | 4.0131 | 0.3207 |
| TSFTPVGDFELNFMNVK                              | 2046.3             | 2            | 5.6089 | 0.553  |
| TSGHDHPDVATMLNILALVYR                          | 2324.6             | 3            | 3.9066 | 0.3793 |
| TSGHDHPDVATMLNILALVYRDQNK                      | 2810.1             | 3            | 4.0538 | 0.2353 |
| TSGHVDFADFMVK                                  | 1582.8             | 2            | 4.3014 | 0.4245 |

| Peptide Sequence                | Peptide mass (m/z) | Charge State | Xcorr  | DelCn2 |
|---------------------------------|--------------------|--------------|--------|--------|
| TSGHVDKFADFMVKDVK               | 1925.2             | 2            | 4.4589 | 0.4028 |
| TSGPASGHALR                     | 1054.1             | 2            | 2.6427 | 0.2625 |
| TSGTEPADFALPSSR                 | 1536.6             | 2            | 3.7333 | 0.4317 |
| TSGTLISFIYPAQNPELLNK            | 2207.5             | 3            | 5.0724 | 0.4267 |
| TSHGEVISVPHK                    | 1291.4             | 3            | 3.7958 | 0.3865 |
| TSHGHLIFPK                      | 1137.3             | 2            | 2.6212 | 0.1966 |
| TSHILSLQK                       | 1027.2             | 2            | 2.7397 | 0.2288 |
| TSIAIDTIINQK                    | 1317.5             | 2            | 4.3446 | 0.3176 |
| TSIAIDTIINQKR                   | 1473.7             | 2            | 3.5995 | 0.305  |
| TSIDAYDNFDNISLAQR               | 1944.0             | 2            | 5.6873 | 0.4426 |
| TSIDAYDNFDNISLAQRLEKHELIEFR     | 3239.5             | 3            | 4.2161 | 0.3563 |
| TSIEDQDELSSLLQVPLVAGTVNR        | 2585.8             | 3            | 5.1208 | 0.3783 |
| TSIVQAAAGGVPPGGSNNGKTPVCHQCHK   | 2777.1             | 3            | 3.4017 | 0.154  |
| TSKAEELLAEEK                    | 1348.5             | 2            | 3.6651 | 0.2949 |
| TSKDTASAVAVGLK                  | 1435.6             | 2            | 4.1058 | 0.3623 |
| TSKETDVVNFDDIASSENLLHLTANRPK    | 3116.4             | 3            | 5.6947 | 0.4848 |
| TSLAGDTSNSSSPASTGAK             | 1739.8             | 2            | 4.2244 | 0.4772 |
| TSLALDESLFR                     | 1252.4             | 2            | 3.4202 | 0.1891 |
| TSLHLLMETLNATTPHYVR             | 2198.5             | 3            | 5.206  | 0.3659 |
| TSLLDNMIGVGDMVLEPLNEETFNNLK     | 3234.7             | 3            | 4.2757 | 0.2204 |
| TSLLDNMIGVGDMVLEPLNEETFNNLKK    | 3362.9             | 3            | 4.7181 | 0.2381 |
| TSLLDNMIGVGDMVLEPLNEETFNNLKKR   | 3519.1             | 3            | 4.3053 | 0.2397 |
| TSLPHFHHPETSRPDSNIYK            | 2364.6             | 3            | 3.5209 | 0.3022 |
| TSLVATPGIDKLTEK                 | 1573.8             | 2            | 3.9843 | 0.4261 |
| TSMESLIHHFK                     | 1330.5             | 2            | 3.5301 | 0.356  |
| TSMNAHSLSEEADSLKHQLDVVIAEK      | 2854.1             | 3            | 4.5338 | 0.3539 |
| TSMNVNEIFMAIAK                  | 1569.9             | 2            | 4.1141 | 0.3205 |
| TSMTEEYRVPDGMVGLIIGR            | 2225.6             | 3            | 5.3262 | 0.386  |
| TSNASRPNFLAPLPHEVTQLR           | 2349.6             | 3            | 4.1117 | 0.2827 |
| TSNEVQYDQR                      | 1240.3             | 2            | 2.9304 | 0.1083 |
| TSNEVTVETDKK                    | 1351.4             | 2            | 3.1523 | 0.2517 |
| TSNHAIVLAQLITK                  | 1509.8             | 2            | 3.9415 | 0.3455 |
| TSNLNEELGQVK                    | 1332.4             | 2            | 3.0431 | 0.1168 |
| TSPADGKPR                       | 929.0              | 2            | 2.4878 | 0.1201 |
| TSPADHGGSVGSESGGSAVDSVAGEHSVSGR | 2841.9             | 3            | 7.1863 | 0.4658 |
| TSPDHPTSLPEPDYSEFQSHPHYR        | 2825.9             | 3            | 3.4503 | 0.143  |

| Peptide Sequence                     | Peptide mass (m/z) | Charge State | Xcorr  | DelCn2 |
|--------------------------------------|--------------------|--------------|--------|--------|
| TSPGRVDLPGSSTTLTK                    | 1717.9             | 2            | 4.3786 | 0.3723 |
| TSPHGILDILVHER                       | 1587.8             | 2            | 2.7488 | 0.337  |
| TSPKPAVVETVTTAKPQQIQALMDEVTK         | 3012.5             | 3            | 4.4749 | 0.4208 |
| TSPVADAAGWVDVDKETLQHR                | 2296.5             | 2            | 5.7971 | 0.4958 |
| TSPVADAAGWVDVDKETLQHRR               | 2452.7             | 3            | 3.5463 | 0.267  |
| TSQENISFETMYDVLSTKPVLNK              | 2646.0             | 3            | 4.8194 | 0.4707 |
| TSQLETLNQLSTHVVVDITR                 | 2507.8             | 3            | 5.2358 | 0.519  |
| TSQQLQLIDEQDSYIQR                    | 2153.3             | 2            | 4.6642 | 0.3985 |
| TSQQNVYNPSEGSTWNPFDNFSKLTAEELLNKDFAK | 4352.6             | 3            | 4.384  | 0.3006 |
| TSQTVATFLDELAQK                      | 1652.8             | 2            | 4.5388 | 0.3973 |
| TSQTVATFLDELAQKPKPLGEQER             | 2704.0             | 3            | 3.9255 | 0.2867 |
| TSREEIFSQNR                          | 1367.5             | 2            | 2.6855 | 0.1481 |
| TSRPENAIYNNNEDFQVGQAK                | 2509.7             | 3            | 5.9885 | 0.5585 |
| TSSAETPTIPLGSAVEAIK                  | 1873.1             | 2            | 4.2063 | 0.3548 |
| TSSAQVEGGVHSLHSYEK                   | 1917.0             | 2            | 4.6379 | 0.512  |
| TSSESIYSRPGSSIPGSPGHTIYAK            | 2580.8             | 3            | 3.7678 | 0.1844 |
| TSSGTKPSVKPTSATK                     | 1577.8             | 2            | 3.5689 | 0.3678 |
| TSSIHQLIAPASYSPIQPHSLIK              | 2489.9             | 3            | 4.8187 | 0.3114 |
| TSSISGPLSPAYTGQVPYNYNQLEGR           | 2801.0             | 2            | 4.6199 | 0.3822 |
| TSSPHKEESPCK                         | 1355.5             | 2            | 2.9981 | 0.1538 |
| TSSSETEKKPEKPLILQSLGPK               | 2527.9             | 3            | 4.5052 | 0.2807 |
| TSTSAVPNLFVPLNTNPK                   | 1901.2             | 2            | 3.6241 | 0.3918 |
| TSTSSSSVQAR                          | 1111.1             | 2            | 2.7301 | 0.3274 |
| TSTTAEKTDEEEKEDR                     | 1869.9             | 2            | 4.2951 | 0.3365 |
| TSTTGVATTQSPTPR                      | 1505.6             | 2            | 3.8184 | 0.5129 |
| TSTVDLPIENQLLWQIDR                   | 2142.4             | 2            | 3.5553 | 0.2083 |
| TSTVDLPIENQLLWQIDREMLNLYIENEGK       | 3577.0             | 3            | 4.6222 | 0.4553 |
| TSVIQGIHTDHNTLK                      | 1664.8             | 2            | 4.3613 | 0.3037 |
| TSVLEMIAQAR                          | 1219.4             | 2            | 4.0856 | 0.2626 |
| TSVPENHAQSR                          | 1226.3             | 2            | 2.4181 | 0.1637 |
| TSVPKEVVYIIFGTVIQEVK                 | 2365.8             | 3            | 4.668  | 0.3905 |
| TSVPKEVVYIIFGTVIQEVKTSNVAR           | 2994.4             | 3            | 5.3174 | 0.4352 |
| TSVQTEDDQLIAGQSAR                    | 1819.9             | 2            | 4.8897 | 0.3769 |
| TSVTDVKFAPK                          | 1193.4             | 2            | 2.5419 | 0.1143 |
| TSYAQHQQVR                           | 1218.3             | 2            | 3.1552 | 0.3078 |
| TSYEEFTHKDGVWNLQNEVTKER              | 2812.0             | 3            | 5.0826 | 0.4481 |

| Peptide Sequence                | Peptide mass (m/z) | Charge State | Xcorr  | DelCn2 |
|---------------------------------|--------------------|--------------|--------|--------|
| TSYFPNPYNQEK                    | 1488.6             | 2            | 3.3504 | 0.4402 |
| TTAAMWALQTVEK                   | 1450.7             | 2            | 2.7312 | 0.1841 |
| TTAAMWALQTVEKER                 | 1736.0             | 2            | 2.8343 | 0.283  |
| TTAQVLIR                        | 902.1              | 2            | 2.5083 | 0.1289 |
| TTARDQDLEPGAPSMGAK              | 1846.0             | 2            | 4.4041 | 0.3305 |
| TTDEELEEMLESGNPAIFTSGIIDSQISK   | 3156.4             | 2            | 3.5771 | 0.2385 |
| TTDGVYEGVAIGGDRYPGSTFMDHVLR     | 2915.2             | 3            | 4.4958 | 0.3719 |
| TTDGYLLR                        | 939.0              | 2            | 3.1493 | 0.1809 |
| TTDIFQTVDLWEGK                  | 1653.8             | 2            | 4.172  | 0.3484 |
| TTDMAPSKETEMALAK                | 1725.0             | 2            | 4.2733 | 0.3724 |
| TTEAEKNER                       | 1078.1             | 2            | 2.5892 | 0.1043 |
| TTEAEPKPLEEPKHETK               | 1965.2             | 3            | 3.3313 | 0.3264 |
| TTEALKSEEK                      | 1136.2             | 2            | 2.922  | 0.232  |
| TTEEALHASHGFMWYT                | 1882.0             | 2            | 2.6405 | 0.2428 |
| TTEETSKPKDD                     | 1251.3             | 2            | 2.8954 | 0.2292 |
| TTELPAADPFALAPFPSK              | 1874.1             | 2            | 4.3565 | 0.34   |
| TTELQDELSHLR                    | 1442.6             | 2            | 3.2501 | 0.3208 |
| TTFEDLIQR                       | 1123.2             | 2            | 3.2012 | 0.2469 |
| TTFHEASR                        | 949.0              | 1            | 1.9754 | 0.207  |
| TTGFGMIYDSL DYAK                | 1682.9             | 2            | 4.0832 | 0.1373 |
| TTGFTFVVDR                      | 1143.3             | 2            | 2.6215 | 0.2687 |
| TTGIVETHFTFK                    | 1381.6             | 2            | 2.8909 | 0.2967 |
| TTGIVLDSGDGVTHNVPIYEGYALPHAIMR  | 3198.6             | 3            | 5.0611 | 0.3184 |
| TTGIVMDSGDGVTHIVPIYEGYALPHAILR  | 3197.7             | 2            | 2.7392 | 0.1581 |
| TTGIVMDSGDGVTHTVPIYEGYALPHAILR  | 3185.6             | 3            | 7.0868 | 0.5453 |
| TTGKPIEASIR                     | 1173.3             | 2            | 2.6704 | 0.3064 |
| TTGKPIEASIRGELSGDFEKLMLAVVK     | 2891.4             | 3            | 3.4912 | 0.1906 |
| TTGMGAIYGMAQTTVDR               | 1774.0             | 2            | 2.9402 | 0.1729 |
| TTGNATVDHLSK                    | 1244.3             | 2            | 3.4797 | 0.3796 |
| TTGVVLDSDGDGVTHAVPIYEGFAMPHSIMR | 3159.6             | 3            | 5.2777 | 0.3937 |
| TTHFVEGGDAGNREDQINR             | 2117.2             | 2            | 4.9117 | 0.3459 |
| TTHHLVYPESFR                    | 1487.6             | 2            | 3.1674 | 0.3176 |
| TTHLIAKEEMIHNLQ                 | 1779.1             | 2            | 3.8038 | 0.2921 |
| TTHTGQVLGSLVHVK                 | 1577.8             | 2            | 4.9101 | 0.3646 |
| TTHYTPLACGSNPLKR                | 1760.0             | 3            | 3.3547 | 0.2381 |
| TTIAGVVYKDGIVLGADTR             | 1950.2             | 2            | 4.7226 | 0.4807 |



| Peptide Sequence                       | Peptide mass (m/z) | Charge State | Xcorr  | DelCn2 |
|----------------------------------------|--------------------|--------------|--------|--------|
| TTIEAIHGLMSQVIK                        | 1642.0             | 2            | 3.855  | 0.3367 |
| TTIEAIHGLMSQVIKDK                      | 1885.2             | 2            | 3.2708 | 0.283  |
| TTIEAIHGLMSQVIKDKLFNQINIS              | 2815.3             | 3            | 3.6456 | 0.1803 |
| TTIHEMFLSTLDPK                         | 1633.9             | 2            | 2.7918 | 0.2673 |
| TTIHLTMQKEEDTSGYR                      | 2139.3             | 2            | 5.0237 | 0.4609 |
| TTIMAVQFDGGVVLGADSR                    | 1938.2             | 2            | 4.6722 | 0.3438 |
| TTISVAHLLAAR                           | 1253.5             | 2            | 3.2712 | 0.2929 |
| TTITMAHLLAAR                           | 1299.6             | 2            | 3.5612 | 0.3583 |
| TTITMAHLLAAREDLSK                      | 1872.2             | 2            | 4.3661 | 0.3221 |
| TTITTTTTSSSGLGSPMIVGSPR                | 2253.5             | 2            | 5.7758 | 0.5215 |
| TTKAPTEPGKYPCGEFCPR                    | 2083.4             | 2            | 2.5989 | 0.1201 |
| TTKNEEENEKEKELQLEYLLGAFESLGK           | 3271.6             | 3            | 4.8069 | 0.2498 |
| TTKSPSDSGYSYETIGK                      | 1821.9             | 2            | 4.439  | 0.3698 |
| TTLKFIWNQKRAHIAKSTLSQKNK               | 2843.3             | 3            | 3.5911 | 0.1485 |
| TTLKREDKSPIAPEELALVHNLR                | 2632.0             | 3            | 3.7636 | 0.1807 |
| TTLPGVVNGANNPAIR                       | 1594.8             | 2            | 3.6781 | 0.2847 |
| TTLPTFQSPEFSVTR                        | 1711.9             | 2            | 3.2231 | 0.2909 |
| TTLTAAITK                              | 920.1              | 2            | 2.7382 | 0.1679 |
| TTLTSESVKDHTTAGR                       | 1819.9             | 2            | 4.6963 | 0.4276 |
| TTNFAGILSQGLR                          | 1378.6             | 2            | 4.6238 | 0.3964 |
| TTNIQGINLLFSSR                         | 1564.8             | 2            | 4.334  | 0.3292 |
| TTPDVIVVFGFR                           | 1399.6             | 2            | 3.8844 | 0.4699 |
| TTPLQTHSIIISDQVPSDQDAHQYLR             | 2965.2             | 3            | 4.8713 | 0.3467 |
| TTPSVVAFTADGER                         | 1451.6             | 2            | 4.085  | 0.5115 |
| TTPSYVAFTDTER                          | 1488.6             | 2            | 3.6273 | 0.4411 |
| TTPSYVAFTDTERLIGDAAKNQVALNPQNTVFDAK    | 3798.2             | 3            | 3.6408 | 0.2685 |
| TTPSYVAFTDTERLIGDAAKNQVALNPQNTVFDAKR   | 3954.4             | 3            | 5.0812 | 0.4451 |
| TTPSYVAFTDTERLIGDAAKNQVAMNPTNTVFDAK    | 3789.2             | 3            | 4.5936 | 0.282  |
| TTPTFFPKDILTLR                         | 1650.9             | 2            | 2.7564 | 0.3498 |
| TTQETIDKTANQASDTFSGIGKK                | 2442.6             | 3            | 5.1356 | 0.4202 |
| TTQIINITMTK                            | 1264.5             | 2            | 2.7581 | 0.1549 |
| TTQVPQFILDDFIQNDR                      | 2051.2             | 2            | 4.9881 | 0.4043 |
| TTQVTQFILDNYIER                        | 1842.0             | 2            | 2.763  | 0.114  |
| TTRTPEEGGYSYDISEK                      | 1934.0             | 3            | 3.2308 | 0.1556 |
| TTSAKETQSIEK                           | 1323.4             | 2            | 3.0397 | 0.275  |
| TTSGYAGGLSSAYGGLTSPGLSYSLSLGSFSGAGSSSF | 3727.9             | 3            | 8.25   | 0.2819 |

| Peptide Sequence                       | Peptide mass (m/z) | Charge State | Xcorr  | DelCn2 |
|----------------------------------------|--------------------|--------------|--------|--------|
| TTSHGRVGATAAVYSAAILEYLTAEVLELAGNASK    | 3536.9             | 3            | 4.9109 | 0.3291 |
| TTSHGRVGATAAVYSAAILEYLTAEVLELAGNASKDLK | 3893.4             | 3            | 4.4149 | 0.3006 |
| TTTAAAVASTGPSSR                        | 1378.5             | 2            | 3.2702 | 0.1516 |
| TTTGNKVFVGALKGAVDGGLSIPHSTK            | 2557.9             | 3            | 4.5298 | 0.3532 |
| TTTGNKVFVGALKGAVDGGLSIPHSTKR           | 2714.1             | 3            | 3.8035 | 0.2652 |
| TTTGSYIANR                             | 1084.2             | 2            | 2.8752 | 0.3328 |
| TTTLSGTAPAAGVVPSR                      | 1586.8             | 2            | 4.215  | 0.4108 |
| TTTTNTQVEGDDEAAFLER                    | 2099.2             | 2            | 4.936  | 0.4416 |
| TTVEPTPGKGP                            | 1212.4             | 2            | 2.7046 | 0.1905 |
| TTVKDLSELGSVR                          | 1405.6             | 2            | 2.9627 | 0.3155 |
| TTVKESATEEK                            | 1223.3             | 2            | 2.7315 | 0.2245 |
| TTVKESATEEKLTPVLLAK                    | 2059.4             | 2            | 5.7814 | 0.3763 |
| TTYDSSLSSYTVPLEKDNSEEFQR               | 2954.1             | 3            | 4.3848 | 0.2797 |
| TTYGGAAAARQSKLRNTPYQAPVRR              | 2834.2             | 3            | 3.2176 | 0.1304 |
| TTYLEDLPPPPEYELAPSKLEEEVDDVFLIR        | 3620.0             | 3            | 3.2494 | 0.2842 |
| TTYLVLDEADR                            | 1296.4             | 2            | 3.4076 | 0.2403 |
| TTYLVLDEADRMLDMGFEPQIR                 | 2615.0             | 2            | 2.7197 | 0.1205 |
| TVAATNMNEESSR                          | 1410.5             | 2            | 3.4243 | 0.3946 |
| TVAEGHGDPLYVGTTR                       | 1677.8             | 2            | 4.7487 | 0.5666 |
| TVAEKVDAVR                             | 1088.2             | 2            | 3.1139 | 0.2417 |
| TVAELEAEKAATITPFRK                     | 1976.3             | 3            | 5.0865 | 0.3834 |
| TVAGGAWTYNTTSAVTVK                     | 1828.0             | 2            | 4.6893 | 0.4657 |
| TVAGIIVEPIQSEGGDNHASDDFFR              | 2675.8             | 3            | 3.342  | 0.1806 |
| TVAIHSDVDASSVHVK                       | 1665.8             | 2            | 4.7324 | 0.4615 |
| TVAIPSGENQINQIALNPTGTFLYAASGNAVR       | 3289.6             | 3            | 6.4786 | 0.3976 |
| TVAPMPPAQDHKR                          | 1448.7             | 2            | 2.4402 | 0.1981 |
| TVASPGVTVEEAVEQIDIGGVTLR               | 2554.9             | 3            | 5.9144 | 0.3845 |
| TVATPLNQVANPNSAIFGGAR                  | 2099.3             | 2            | 3.1519 | 0.1666 |
| TVATPLNQVANPNSAIFGGARPREEVVQKEQE       | 3451.8             | 3            | 3.4253 | 0.2668 |
| TVAVITSDGR                             | 1019.1             | 2            | 3.042  | 0.2646 |
| TVAYHEAGHAVAGWYLEHADPLLK               | 2649.9             | 3            | 5.1003 | 0.3627 |
| TVAYTEQK                               | 940.0              | 1            | 2.0647 | 0.1022 |
| TVDFTQDSNYLLTGGQDK                     | 2003.1             | 2            | 4.1776 | 0.3648 |
| TVDLKPDPWGK                            | 1159.3             | 2            | 2.7701 | 0.2276 |
| TVDLSSHLAK                             | 1071.2             | 2            | 2.8951 | 0.241  |
| TVDLSSHLAKVTAEVVLAHLGGGSTR             | 2707.0             | 3            | 6.6503 | 0.4689 |

| Peptide Sequence                            | Peptide mass (m/z) | Charge State | Xcorr  | DelCn2 |
|---------------------------------------------|--------------------|--------------|--------|--------|
| TVDNFVALATGEK                               | 1365.5             | 2            | 3.8276 | 0.4023 |
| TVDNFVALATGEKGFYK                           | 1918.1             | 2            | 4.9093 | 0.4529 |
| TVEAEAAHGTVTR                               | 1342.4             | 2            | 3.7024 | 0.4393 |
| TVEEIEACMAGCDKAFTPFSGPK                     | 2432.8             | 3            | 4.5357 | 0.2906 |
| TVEELLETGLIQVATKEEELNAIR                    | 2700.0             | 3            | 5.9855 | 0.3972 |
| TVEEVLGHFGVNESTGLSLEQVK                     | 2473.7             | 2            | 5.1074 | 0.4319 |
| TVEEVLGHFGVNESTGLSLEQVKK                    | 2601.9             | 3            | 4.9307 | 0.4415 |
| TVEEVTVERNEK                                | 1433.5             | 2            | 3.0714 | 0.205  |
| TVEINNTDAEGR                                | 1319.4             | 2            | 3.0769 | 0.226  |
| TVEIPDPVEAGEEVK                             | 1612.8             | 2            | 3.2594 | 0.3126 |
| TVEIPDPVEAGEEVKVR                           | 1868.1             | 2            | 4.179  | 0.4406 |
| TVEKELTYEK                                  | 1240.4             | 2            | 2.6394 | 0.1769 |
| TVENIKDPLFR                                 | 1332.5             | 2            | 3.153  | 0.1554 |
| TVENLEKYVVKDGKLPILLSR                       | 2415.9             | 3            | 4.6267 | 0.2422 |
| TVENVTVFGTASASK                             | 1511.7             | 2            | 5.1358 | 0.4402 |
| TVENVTVFGTASASKHEALKENGVTHTPIDYHTTDYVDEIKK  | 4547.0             | 3            | 3.8519 | 0.207  |
| TVEPFSELGLGEGPQLQILEEMKPLESLALEEASGPVVSQSQK | 4498.0             | 3            | 4.6719 | 0.4352 |
| TVESEAASYLDQISR                             | 1669.8             | 2            | 3.6395 | 0.233  |
| TVESITDIR                                   | 1034.1             | 2            | 3.4191 | 0.2794 |
| TVESITDIRADIDKK                             | 1704.9             | 2            | 3.1097 | 0.1307 |
| TVESITDIRADIDKKYR                           | 2024.3             | 3            | 3.3498 | 0.2952 |
| TVESLEETLKK                                 | 1277.4             | 2            | 2.8807 | 0.2662 |
| TVETRDGQVINETSQHHDDLE                       | 2424.5             | 3            | 5.0933 | 0.3903 |
| TVEVAEGEAVR                                 | 1160.3             | 2            | 4.2129 | 0.3825 |
| TVEVAEGEAVRTPQSVTAK                         | 1973.2             | 2            | 5.1057 | 0.4283 |
| TVEVPFKGDVEHTIR                             | 1727.9             | 2            | 3.7676 | 0.3198 |
| TVEVPYKGDVENTILDILGGLR                      | 2402.7             | 3            | 4.1194 | 0.3372 |
| TVEYLHSQGVVHR                               | 1525.7             | 2            | 3.4774 | 0.3702 |
| TVFAEHISDECKR                               | 1535.7             | 2            | 2.6023 | 0.2694 |
| TVFDEAIR                                    | 951.1              | 2            | 2.4175 | 0.2042 |
| TVFETLDIGWQLLR                              | 1692.0             | 2            | 4.1769 | 0.2498 |
| TVFFESLER                                   | 1128.3             | 2            | 2.801  | 0.2106 |
| TVFGVEPDLTR                                 | 1234.4             | 2            | 2.9401 | 0.156  |
| TVFGVEPDLTREGGSIPVTLTFQEATGK                | 2951.3             | 3            | 4.3894 | 0.2261 |
| TVFQKENGTVTAANASTLNDGAAALVLMTADAAK          | 3366.7             | 3            | 6.4587 | 0.4594 |
| TVFQKENGTVTAANASTLNDGAAALVLMTADAAKR         | 3522.9             | 3            | 6.7552 | 0.5266 |

| Peptide Sequence                         | Peptide mass (m/z) | Charge State | Xcorr  | DelCn2 |
|------------------------------------------|--------------------|--------------|--------|--------|
| TVGEIKQFVSQLPHMQAAR                      | 2141.5             | 3            | 3.5958 | 0.259  |
| TVGFGTNNSEHITYLEHNPYEK                   | 2551.7             | 3            | 4.5395 | 0.3471 |
| TVGIADSNYNWFYGPESQLVFLDKFILK             | 3266.7             | 3            | 3.5759 | 0.1548 |
| TVGIDDLTGEPLIQREDDKPETVIK                | 2783.1             | 3            | 4.1108 | 0.3085 |
| TVGIDDLTGEPLIQREDDKPETVIKR               | 2939.3             | 3            | 4.7721 | 0.244  |
| TVGLFLQGGKDWSPPLYIR                      | 2152.5             | 3            | 5.1054 | 0.3784 |
| TVGMLSNMIAFYDMAR                         | 1821.2             | 2            | 4.3493 | 0.4465 |
| TVGMVAGDEETYEVFADLFDPIQER                | 2932.2             | 3            | 4.2306 | 0.3764 |
| TVGQLYKEQLAK                             | 1378.6             | 2            | 4.374  | 0.2445 |
| TVGQLYKESLTK                             | 1367.6             | 2            | 3.8873 | 0.3361 |
| TVGVEPAADGKGVVVVIK                       | 1739.0             | 2            | 4.8252 | 0.4474 |
| TVGVEPAADGKGVVVVIKR                      | 1895.2             | 2            | 2.655  | 0.1751 |
| TVHTEWTQR                                | 1158.2             | 2            | 2.8013 | 0.1113 |
| TVHYLPILFIDQLSNR                         | 1930.2             | 3            | 3.9346 | 0.1896 |
| TVIAQHHVAPR                              | 1229.4             | 2            | 2.473  | 0.2023 |
| TVIDYNGER                                | 1067.1             | 2            | 2.6942 | 0.243  |
| TVIGDHGDELFSVFGAPFLK                     | 2150.4             | 2            | 4.5421 | 0.4854 |
| TVIGDHGDELFSVFGAPFLKEGASEEEIR            | 3151.4             | 3            | 5.2652 | 0.4028 |
| TVIGDHGDELFSVFGAPFLKEGASEEEIRLSK         | 3479.8             | 3            | 6.0234 | 0.4538 |
| TVIIEQSWGSPK                             | 1345.5             | 2            | 4.3797 | 0.2686 |
| TVIIHDRPDITHPR                           | 1670.9             | 2            | 2.469  | 0.102  |
| TVIKEGEEQLQTQHQQ                         | 1897.1             | 3            | 4.4862 | 0.2792 |
| TVIKKDEQEHEFYK                           | 1795.0             | 2            | 4.6353 | 0.4035 |
| TVIPGMPTVIPPLTR                          | 1650.0             | 2            | 3.0183 | 0.2945 |
| TVIQPGIYHPDIQLLHPINLEFLVNR               | 3041.5             | 3            | 3.9605 | 0.3085 |
| TVITPDPNLSIDQVGVPR                       | 1922.2             | 2            | 4.14   | 0.4014 |
| TVIVHGFTLGEKGEK                          | 1615.9             | 2            | 3.8751 | 0.3911 |
| TVIVNMVDVAK                              | 1189.5             | 2            | 2.6568 | 0.1176 |
| TVKEEA EKPER                             | 1316.4             | 2            | 3.5238 | 0.2211 |
| TVKEEA EKPEREAK                          | 1644.8             | 2            | 4.3848 | 0.2651 |
| TVKENWKNLSDSEKELYIQHAK                   | 2662.0             | 3            | 3.6349 | 0.1487 |
| TVKEVLPALENNKEQIQK                       | 2082.4             | 2            | 4.4547 | 0.34   |
| TVKEVLPALENNKEQIQKIIETLTQQLQAK           | 3450.0             | 3            | 3.7096 | 0.2091 |
| TVKHPTLLQDPDLR                           | 1633.9             | 3            | 4.3593 | 0.3303 |
| TVLCGTCGQPADKASASGSGAQVGGPISSGSSASSVTVTR | 3641.0             | 3            | 6.712  | 0.504  |
| TVLDPVTGDLSDTR                           | 1489.6             | 2            | 3.8488 | 0.369  |

| Peptide Sequence                        | Peptide mass (m/z) | Charge State | Xcorr  | DelCn2 |
|-----------------------------------------|--------------------|--------------|--------|--------|
| TVLDQQQTPSR                             | 1273.4             | 2            | 3.622  | 0.2641 |
| TVLEHYALEDDPLAAFKQR                     | 2217.5             | 3            | 3.3846 | 0.1734 |
| TVLELMNPEAQLPQVYPFAADLYQK               | 2880.3             | 3            | 5.2632 | 0.3537 |
| TVLELQYVLDKLGDDDEV                      | 2106.4             | 2            | 4.103  | 0.3234 |
| TVLELQYVLDKLGDDDEVRTDLK                 | 2563.9             | 3            | 4.1527 | 0.2797 |
| TVLGQQILGQLDSSSLALPSEAK                 | 2356.7             | 3            | 3.468  | 0.2482 |
| TVLGTPEVLLGALPGAGGTQR                   | 2008.3             | 3            | 4.3532 | 0.2918 |
| TVLGTPEVLLGALPGAGGTQRLPK                | 2346.8             | 2            | 3.8634 | 0.1806 |
| TVLIMELINNVAK                           | 1458.8             | 2            | 5.2141 | 0.3651 |
| TVLLSIQALLSAPNPDDPLANDVAEQWKTNEAQAIETAR | 4205.6             | 3            | 4.8665 | 0.4126 |
| TVLNSEVLEQR                             | 1288.4             | 2            | 3.2614 | 0.219  |
| TVLQIDDNVTSAVEGINR                      | 1945.1             | 2            | 2.9398 | 0.3302 |
| TVLQQVIEDGSKYGLK                        | 1779.0             | 2            | 2.6275 | 0.2674 |
| TVLQRPLSLIQGPPGTGK                      | 1863.2             | 2            | 3.5355 | 0.2483 |
| TVLRDNAIPTIFDLTSHLNNPHSR                | 2733.0             | 3            | 4.1059 | 0.2676 |
| TVLSANADHMAQIEGLMDDVDFK                 | 2521.8             | 2            | 5.4183 | 0.4302 |
| TVLSANADHMAQIEGLMDDVDFKAK               | 2721.1             | 3            | 5.8786 | 0.3324 |
| TVLSNVQEELDR                            | 1403.5             | 2            | 3.2436 | 0.2538 |
| TVLVIAHR                                | 909.1              | 2            | 2.4715 | 0.1085 |
| TVLVNADGEEVAMR                          | 1504.7             | 2            | 4.0743 | 0.4602 |
| TVLWNPEDLIPLPIPK                        | 1846.2             | 2            | 2.8487 | 0.1907 |
| TVMIPGPQLKPEEEYEEAQGEAQKPQLA            | 3112.5             | 3            | 4.158  | 0.2596 |
| TVMPYISTTPAK                            | 1309.6             | 2            | 3.0165 | 0.2831 |
| TVMVQEGNVESAYR                          | 1583.7             | 2            | 4.4489 | 0.3739 |
| TVNVVQFEPK                              | 1248.4             | 2            | 3.3286 | 0.3035 |
| TVNVVQFEPKGAIGK                         | 1674.9             | 2            | 3.6614 | 0.2191 |
| TVPEELVKPEELSK                          | 1598.8             | 2            | 3.2164 | 0.3615 |
| TVPFCSTFAAFFTR                          | 1595.8             | 2            | 3.198  | 0.3989 |
| TVPKTVDNFVALATGEKGFYK                   | 2343.7             | 3            | 3.3532 | 0.2249 |
| TVPLAGHVGFDLDPQLVVK                     | 2108.4             | 3            | 4.8798 | 0.4642 |
| TVPNDATQTKENESKA                        | 1733.8             | 2            | 2.8694 | 0.3919 |
| TVPPAVTGITFLSGGQSEEEASINLNAINK          | 3059.4             | 3            | 5.2331 | 0.4187 |
| TVQDALESVLR                             | 1302.5             | 2            | 3.6131 | 0.288  |
| TVQDLTSVVQTLQMQDKFQTMSDQIIGR            | 3453.9             | 3            | 5.1399 | 0.4561 |
| TVQGPPTSDDIFER                          | 1562.7             | 2            | 3.5754 | 0.4863 |
| TVQGSQGHQEHINIK                         | 1685.8             | 2            | 3.9204 | 0.2803 |

| Peptide Sequence                          | Peptide mass (m/z) | Charge State | Xcorr  | DelCn2 |
|-------------------------------------------|--------------------|--------------|--------|--------|
| TVQHQDSQVNALEVTDPDR                       | 2038.2             | 2            | 3.3391 | 0.2975 |
| TVQLTSSELESTLETLKAENQPIRDVLK              | 3144.5             | 3            | 3.5715 | 0.1141 |
| TVQPVAMGPDGLPVDASSVSNNYIQTLLGR            | 2988.3             | 3            | 5.0668 | 0.4295 |
| TVQQHAGETDPVTTMR                          | 1771.9             | 2            | 5.42   | 0.502  |
| TVQQKLEQLNQYPDFNNYLIFVLTK                 | 3058.5             | 3            | 5.197  | 0.1709 |
| TVQSLEIDLDSMR                             | 1507.7             | 2            | 4.631  | 0.4194 |
| TVQSLEIDLDSMRNLK                          | 1863.1             | 2            | 3.574  | 0.2394 |
| TVQTAAANAASTAASSAAQNAFK                   | 2153.3             | 3            | 4.3705 | 0.2936 |
| TVQTAAANAASTAASSAAQNAFKGNQI               | 2565.7             | 3            | 4.4156 | 0.3289 |
| TVQTDHNAVQR                               | 1269.3             | 2            | 3.3963 | 0.3664 |
| TVQYQNELHK                                | 1260.4             | 2            | 2.8005 | 0.148  |
| TVRDTLLALHQHGHSGPFESK                     | 2331.6             | 3            | 3.8815 | 0.2922 |
| TVSDGLHHPSQLHSK                           | 1643.8             | 2            | 3.4279 | 0.3642 |
| TVSDLIDQKVYELQASR                         | 1966.2             | 3            | 5.7735 | 0.4946 |
| TVSGVNGPLVILDHVK                          | 1648.9             | 2            | 3.5559 | 0.3692 |
| TVSGVNGPLVILDHVKFPR                       | 2049.4             | 2            | 5.122  | 0.5302 |
| TVSHEAEVHAESLQKLESSQLQIAGLEHLR            | 3469.8             | 3            | 4.153  | 0.1222 |
| TVSIEEFFGDLNNFR                           | 1788.9             | 2            | 4.1409 | 0.3902 |
| TVSKVDDFLANEAK                            | 1537.7             | 2            | 4.0552 | 0.3004 |
| TVSLGAGAKDELHIVEAEAMNYEGSPIK              | 2931.3             | 2            | 6.2083 | 0.4938 |
| TVSLGAGAKDELHIVEAEAMNYEGSPIKVTLATLK       | 3658.2             | 3            | 8.5264 | 0.5877 |
| TVSLLDENNVSSYLSK                          | 1769.9             | 2            | 4.7742 | 0.3921 |
| TVSLVHESFLDLSLPVLDDQSGKK                  | 2629.0             | 3            | 4.7497 | 0.44   |
| TVSNDSFFNFFAPPEVPESGDLDDDAEAILAADFEIGHFLR | 4517.8             | 3            | 3.6658 | 0.3309 |
| TVSPDRLELEAAQK                            | 1557.7             | 2            | 3.4849 | 0.2667 |
| TVSPDRLELEAAQKFLER                        | 2103.4             | 3            | 4.5163 | 0.4088 |
| TVSSHEVFLQR                               | 1303.4             | 2            | 2.5953 | 0.2066 |
| TVSTGTALSK                                | 965.1              | 2            | 2.5846 | 0.1618 |
| TVSTLHHVLQR                               | 1291.5             | 2            | 3.4023 | 0.3979 |
| TVTAMDVVYALK                              | 1311.6             | 2            | 3.9985 | 0.4834 |
| TVTAMDVVYALKR                             | 1467.8             | 2            | 3.6997 | 0.4137 |
| TVTEYKIDEDGKK                             | 1526.7             | 2            | 4.0834 | 0.3313 |
| TVTNAVVTVPAYFNDSQR                        | 1983.2             | 2            | 5.2118 | 0.4427 |
| TVTPALSSNVLPR                             | 1355.6             | 2            | 3.6883 | 0.2101 |
| TVTSATIVYHLAR                             | 1432.6             | 2            | 2.8524 | 0.1383 |
| TVVAGSSDAAQK                              | 1134.2             | 2            | 2.7509 | 0.1872 |

| Peptide Sequence                   | Peptide mass (m/z) | Charge State | Xcorr  | DelCn2 |
|------------------------------------|--------------------|--------------|--------|--------|
| TVVDFETDVLFLVPTEIALAQHR            | 2615.0             | 3            | 4.6262 | 0.3249 |
| TVVGQITVDMMYGGMR                   | 1759.1             | 2            | 2.8055 | 0.3584 |
| TVVNKDVFRDPALK                     | 1602.9             | 2            | 3.8489 | 0.1848 |
| TVVSGLVNHVPLEQMQR                  | 2022.3             | 2            | 4.4362 | 0.4341 |
| TVVSGLVQFVPKEELQDR                 | 2045.3             | 2            | 4.0014 | 0.3531 |
| TVVTGIEMFHK                        | 1262.5             | 2            | 3.4593 | 0.3296 |
| TVWDWELMNDIKPIWQR                  | 2231.6             | 2            | 2.7477 | 0.2027 |
| TVWDWELMNDIKPIWQRPSK               | 2543.9             | 2            | 4.3751 | 0.3437 |
| TVWDWELMNDIKPIWQRPSKEVEEDEYK       | 3566.0             | 3            | 4.6606 | 0.3376 |
| TVWDWELMNDIKPIWQRPSKEVEEDEYKAFYK   | 4075.6             | 3            | 4.2812 | 0.1951 |
| TVWLGHPK                           | 1223.4             | 2            | 2.8906 | 0.1779 |
| TVWSSGDDKEQLVK                     | 1592.7             | 2            | 3.7569 | 0.294  |
| TVYVGNLNSQTTTADQLLEFFK             | 2490.7             | 2            | 4.2386 | 0.4061 |
| TWDHFWLNEGHTVYLER                  | 2204.4             | 3            | 3.7425 | 0.2554 |
| TWEQQQEVVSR                        | 1390.5             | 2            | 3.9813 | 0.2324 |
| TWGD LGAAAGGGTPSK                  | 1446.5             | 2            | 2.5619 | 0.1899 |
| TWIEGLTGLSIGPDFQK                  | 1863.1             | 2            | 4.2724 | 0.3235 |
| TWITNSPMADLFVWAR                   | 2008.3             | 2            | 3.5408 | 0.3618 |
| TWNDPSVQQDIK                       | 1431.5             | 2            | 4.0361 | 0.3159 |
| TWNDPSVQQDIKFLPFK                  | 2064.3             | 2            | 4.1495 | 0.3973 |
| TWNDPSVQQDIKFLPFKVVEKK             | 2648.1             | 3            | 4.3561 | 0.3612 |
| TWPDHGVPSDPGGVLDLFLEEVHHK          | 2669.9             | 3            | 4.1341 | 0.2798 |
| TWWNQFSVTALQLLQANR                 | 2177.5             | 2            | 3.4419 | 0.2101 |
| TWYAKLDEEAENLVATVVPHTLAAAVPEVAVYLK | 3713.2             | 3            | 4.298  | 0.2473 |
| TYADYESVNECMGVCK                   | 1942.1             | 2            | 3.5571 | 0.3562 |
| TYAEPLTAAMVEFYTMSQER               | 2339.6             | 2            | 5.6476 | 0.5257 |
| TYAYLFSHPSR                        | 1342.5             | 2            | 3.3536 | 0.4426 |
| TYDATTHFETTCDDIKNIYK               | 2380.6             | 3            | 4.7072 | 0.429  |
| TYDATTHFETTCDDIKNIYKR              | 2536.8             | 3            | 4.6209 | 0.3778 |
| TYDLPGNFLTQALTQR                   | 1839.0             | 2            | 3.0802 | 0.1925 |
| TYDLYITYDKYYQTPR                   | 2104.3             | 3            | 3.6488 | 0.3822 |
| TYDRDNSGMIDKNEK                    | 1900.1             | 2            | 3.7881 | 0.2188 |
| TYEDIDKR                           | 1040.1             | 2            | 2.7302 | 0.2565 |
| TYEDIKENLESR                       | 1497.6             | 2            | 3.8621 | 0.3878 |
| TYEEGLKHEANNPQLK                   | 1872.0             | 2            | 4.6094 | 0.4573 |
| TYEEGLKHEANNPQLKEGLQNMEAR          | 2901.2             | 3            | 5.8636 | 0.3898 |

| Peptide Sequence                   | Peptide mass (m/z) | Charge State | Xcorr  | DelCn2 |
|------------------------------------|--------------------|--------------|--------|--------|
| TYEQVLENLESK                       | 1453.6             | 2            | 3.0022 | 0.246  |
| TYEQVLENLESKR                      | 1609.8             | 2            | 3.6431 | 0.3042 |
| TYFPHFDLSHGSAQVK                   | 1835.0             | 2            | 3.7886 | 0.504  |
| TYGADLASVDFQHASEDAR                | 2054.1             | 2            | 5.4378 | 0.4904 |
| TYGADLASVDFQHASEDARK               | 2182.3             | 2            | 5.4472 | 0.4965 |
| TYGEIFEKFHPIR                      | 1637.9             | 2            | 2.6431 | 0.2272 |
| TYGEPESAGPSR                       | 1251.3             | 2            | 3.3513 | 0.3052 |
| TYGLPCHCPFKEGTYSLPK                | 2142.5             | 2            | 3.3606 | 0.2405 |
| TYHALSNLPK                         | 1144.3             | 2            | 2.8327 | 0.225  |
| TYHSVGDVSVLR                       | 1234.3             | 2            | 2.6745 | 0.2269 |
| TYIGEIFTQILVLPYVGK                 | 2055.4             | 2            | 3.8838 | 0.2344 |
| TYIPPKGETK                         | 1134.3             | 2            | 2.553  | 0.182  |
| TYIRQDNER                          | 1195.3             | 2            | 2.6877 | 0.148  |
| TYKYVNMQDPEMDMK                    | 1894.2             | 2            | 4.8973 | 0.3745 |
| TYLGDPPIPYDPQITAEELAEK             | 2364.6             | 2            | 2.9108 | 0.2177 |
| TYLHTYESEI                         | 1256.3             | 2            | 2.9955 | 0.1235 |
| TYLSEGPYYVKPVSTTAVEGAE             | 2362.6             | 2            | 4.51   | 0.3316 |
| TYLVSGQPLEEIIITYYPAMK              | 2317.7             | 2            | 5.0281 | 0.4366 |
| TYNFLPEFLVSTQK                     | 1687.9             | 2            | 4.3012 | 0.4146 |
| TYNFLPEFLVSTQKTYGADLASVDFQHASEDAR  | 3723.0             | 3            | 4.9677 | 0.3678 |
| TYNFLPEFLVSTQKTYGADLASVDFQHASEDARK | 3851.2             | 3            | 3.7455 | 0.1238 |
| TYNRVPLHKPTDWQK                    | 1884.1             | 2            | 3.5216 | 0.266  |
| TYPEWHVATEPVATWQNIQAAGTQK          | 2828.1             | 3            | 4.1909 | 0.3014 |
| TYPKDPYQEEWPQGFGQLTK               | 2542.7             | 3            | 3.3758 | 0.1309 |
| TYQELLVNQNPQIAQPLASR               | 2156.4             | 2            | 5.1074 | 0.4314 |
| TYQFLQEYLDAIKK                     | 1761.0             | 2            | 3.7478 | 0.3007 |
| TYRPELIKDGK                        | 1320.5             | 2            | 2.9694 | 0.1676 |
| TYRPLNDVHIK                        | 1356.6             | 3            | 4.0899 | 0.3626 |
| TYRPLNDVHIKDITIHANPFAQ             | 2564.9             | 3            | 4.3361 | 0.3522 |
| TYSAKLDNAR                         | 1139.2             | 2            | 2.4453 | 0.2539 |
| TYSEDNFEELQYFPNIFYALLK             | 2632.9             | 3            | 5.2734 | 0.3312 |
| TYSLGSALRPSTSR                     | 1496.7             | 2            | 2.6326 | 0.384  |
| TYSTSFTPMYHAVTK                    | 1735.0             | 2            | 4.3826 | 0.5374 |
| TYSVEYLPK                          | 1100.2             | 2            | 2.5451 | 0.1927 |
| TYSWDNAQVILVGNK                    | 1708.9             | 2            | 3.9625 | 0.4024 |
| TYSWDNAQVLLVGNK                    | 1708.9             | 2            | 4.5098 | 0.3882 |



| Peptide Sequence                  | Peptide mass (m/z) | Charge State | Xcorr  | DelCn2 |
|-----------------------------------|--------------------|--------------|--------|--------|
| TYSYLNKLPVK                       | 1326.6             | 2            | 3.1126 | 0.3378 |
| TYSYLNKLPVKSEYPSIK                | 2131.5             | 3            | 4.3913 | 0.4631 |
| TYSYLTPLDWK                       | 1387.6             | 2            | 3.6773 | 0.3752 |
| TYSYLTPLDWKETVFTK                 | 2093.4             | 2            | 2.4298 | 0.1658 |
| TYTAYVDLEKDFAAEVVHPGDLK           | 2582.8             | 3            | 4.6649 | 0.3977 |
| TYTETVNHYYLLFQDSDLGTFHDLR         | 3137.4             | 3            | 5.4785 | 0.3622 |
| TYTIANQFPLNK                      | 1410.6             | 2            | 4.0535 | 0.3287 |
| TYTIANQFPLNKLELLR                 | 2136.5             | 3            | 3.5735 | 0.3651 |
| TYTIRNEHVDYVDVGGAYVGPTQNR         | 2826.0             | 3            | 5.413  | 0.3992 |
| TYTVNHETSHPPPSK                   | 1695.8             | 2            | 2.8864 | 0.324  |
| TYVGVVDGENELASPK                  | 1678.8             | 2            | 4.2797 | 0.327  |
| TYVTPPGTGFLPGDTAR                 | 1750.9             | 2            | 3.7839 | 0.3633 |
| TYWEDNKNSLISYLEQIHR               | 2410.6             | 3            | 5.6414 | 0.4853 |
| TYYMSGGLQPVPIVFR                  | 1829.2             | 2            | 4.3346 | 0.239  |
| VAAALDDGSALGR                     | 1216.3             | 2            | 3.7318 | 0.3529 |
| VAAALDDGSALGRFER                  | 1648.8             | 2            | 2.687  | 0.1776 |
| VAAALPGMESTQDR                    | 1446.6             | 2            | 3.2669 | 0.3663 |
| VAAALTAMDKPLGR                    | 1414.7             | 2            | 3.3814 | 0.3506 |
| VAAENALSVAAEEQIR                  | 1600.8             | 2            | 4.0374 | 0.3538 |
| VAAGLPILVHTDAAQALGK               | 1943.3             | 2            | 3.5118 | 0.3845 |
| VAAGLQIK                          | 800.0              | 1            | 2.2286 | 0.1643 |
| VAAGVLCELAQDKEAAEAIEAEGATAPLLELLR | 3579.0             | 3            | 6.9206 | 0.5146 |
| VAAHITGTR                         | 926.1              | 2            | 2.683  | 0.3398 |
| VAAIEALNDGELQK                    | 1471.6             | 2            | 4.4704 | 0.1069 |
| VAAIEALNDGELQKAILDFTDAIK          | 2559.9             | 3            | 5.9854 | 0.1063 |
| VAAIEALNDGELQKAILDFTDAIKLNPR      | 3040.5             | 3            | 5.682  | 0.5298 |
| VAAKLEVAPISDIIAIK                 | 1752.1             | 2            | 3.6466 | 0.29   |
| VAAKLEVAPISDIIAIKSPDTFVR          | 2555.0             | 3            | 6.3252 | 0.4991 |
| VAAALAEKSR                        | 1074.2             | 2            | 2.9667 | 0.2257 |
| VAAALFPALRPGGFQAHYR               | 1972.3             | 2            | 2.8485 | 0.1919 |
| VAAANAPK                          | 670.8              | 1            | 1.7668 | 0.1859 |
| VAAANAVDPKNDSHVLIELHK             | 2171.4             | 3            | 4.302  | 0.337  |
| VAAPDVVVPTLDTVR                   | 1552.8             | 2            | 3.0866 | 0.2236 |
| VAAASIGNAQK                       | 959.1              | 2            | 2.5244 | 0.1257 |
| VAAASNIVQMKDDHDK                  | 1671.9             | 2            | 4.0605 | 0.4241 |
| VAAASVLPYVK                       | 1161.4             | 2            | 3.3666 | 0.2721 |

| Peptide Sequence                          | Peptide mass (m/z) | Charge State | Xcorr  | DelCn2 |
|-------------------------------------------|--------------------|--------------|--------|--------|
| VAATRQEIFQEQLAAVPEFR                      | 2304.6             | 2            | 4.5318 | 0.4274 |
| VAAYDKLEK                                 | 1037.2             | 2            | 2.7537 | 0.2345 |
| VAAYDKLEKTK                               | 1266.5             | 2            | 2.6602 | 0.1038 |
| VACIGAWHPAR                               | 1181.4             | 2            | 2.5871 | 0.1018 |
| VADAATEVQHK                               | 1169.3             | 2            | 3.083  | 0.3755 |
| VADALTNAVAHVDDMPNALSALSDLHAHK             | 2998.3             | 3            | 6.7198 | 0.4984 |
| VADALTNAVAHVDDMPNALSALSDLHAHKLR           | 3267.7             | 3            | 3.4218 | 0.3712 |
| VADAMKQMKEK                               | 1279.5             | 2            | 2.8436 | 0.2316 |
| VADGLPLAASMQEDEQSGR                       | 1975.1             | 2            | 3.4975 | 0.4129 |
| VADGLPLAASMQEDEQSGRDLQQYQSQAK             | 3165.4             | 3            | 3.4277 | 0.3203 |
| VADHSGQVK                                 | 941.0              | 2            | 2.6643 | 0.1747 |
| VADHSGQVGTK                               | 1170.3             | 2            | 2.5136 | 0.2057 |
| VADIGLAAWGR                               | 1129.3             | 2            | 3.6043 | 0.3609 |
| VADILTQLLQTDDSAEFNLVNNALLSIFK             | 3207.6             | 2            | 3.8601 | 0.4247 |
| VADILTQLLQTDDSAEFNLVNNALLSIFKMDAK         | 3653.2             | 3            | 4.7646 | 0.3684 |
| VADISGDTQK                                | 1034.1             | 2            | 3.1884 | 0.2765 |
| VADISGDTQKAK                              | 1233.4             | 2            | 3.541  | 0.1743 |
| VADKIQLINMLDKVNEMIIGGGMAFTFLK             | 3326.0             | 3            | 6.7813 | 0.4274 |
| VADLSPIPVVLYSVPANTGLDLPVDAVVTLISQHPNIVGMK | 4141.8             | 3            | 3.9336 | 0.2561 |
| VADLTEQYNEQYGAVR                          | 1857.0             | 2            | 5.497  | 0.396  |
| VADPAYLPTQQDVLR                           | 1686.9             | 2            | 4.2154 | 0.1833 |
| VADPDHDHTGFLTEYVATR                       | 2145.3             | 3            | 5.0389 | 0.5043 |
| VADPTPFHIQAEVTMK                          | 1785.1             | 2            | 4.3048 | 0.4354 |
| VADQDGDSMATR                              | 1266.3             | 2            | 3.0314 | 0.2687 |
| VADQLRDQLEKGNLR                           | 1756.0             | 2            | 3.5285 | 0.161  |
| VADSSKGPDEAK                              | 1204.3             | 2            | 3.3954 | 0.2433 |
| VADSSKGPDEAKIK                            | 1445.6             | 2            | 3.5219 | 0.1728 |
| VADWTGATYQDKR                             | 1511.6             | 2            | 3.6261 | 0.3709 |
| VAEAEKQLGAAERDFIHTASISFLTPLR              | 3072.5             | 3            | 4.075  | 0.3743 |
| VAEAHENIIHGSGATGK                         | 1691.8             | 2            | 5.2553 | 0.516  |
| VAEDEAEAAAAAK                             | 1246.3             | 2            | 4.3647 | 0.4103 |
| VAEEHAPSIVFIDEIDAIGTK                     | 2255.5             | 3            | 4.7886 | 0.4872 |
| VAEEHAPSIVFIDEIDAIGTKR                    | 2411.7             | 3            | 5.4168 | 0.4626 |
| VAEELALEQAKK                              | 1329.5             | 2            | 3.3966 | 0.224  |
| VAEELALEQAKKESQDKR                        | 2202.4             | 2            | 5.3477 | 0.4414 |
| VAEELVAAAR                                | 1029.2             | 2            | 3.3136 | 0.1941 |

| Peptide Sequence                     | Peptide mass (m/z) | Charge State | Xcorr  | DelCn2 |
|--------------------------------------|--------------------|--------------|--------|--------|
| VAEGKQEEIQQK                         | 1387.5             | 2            | 3.5814 | 0.1458 |
| VAEIEHAEKEK                          | 1283.4             | 2            | 3.3594 | 0.2511 |
| VAEKEELEQGSRPAPTLSEEEKIR             | 2639.9             | 3            | 4.808  | 0.2939 |
| VAEKEGWPLDIR                         | 1413.6             | 2            | 2.9066 | 0.1927 |
| VAEKEPINK                            | 1028.2             | 2            | 2.5815 | 0.1178 |
| VAEKLDEIYVAGLVAHSDLDER               | 2443.7             | 3            | 6.3475 | 0.4995 |
| VAEKLEALSVKEETKEDAEK                 | 2376.6             | 3            | 5.2554 | 0.3773 |
| VAEKLEALSVKEETKEDAEKQ                | 2504.7             | 3            | 4.9979 | 0.3774 |
| VAELSSDDFHLDR                        | 1504.6             | 2            | 3.0507 | 0.2083 |
| VAELYSIHNSGDKSDIQDLLESVR             | 2689.9             | 3            | 4.3761 | 0.3588 |
| VAENVADKNEEPSSNHIPHGK                | 2273.4             | 3            | 3.9385 | 0.209  |
| VAEQAANDLR                           | 1087.2             | 2            | 3.5291 | 0.2974 |
| VAEQAANDLRAQVTELEDELTAEDAK           | 2902.1             | 3            | 5.9685 | 0.417  |
| VAEQAANDLRAQVTELEDELTAEDAKLR         | 3171.4             | 3            | 5.8245 | 0.3544 |
| VAEQTPLSALYLASLIK                    | 1818.1             | 2            | 4.2071 | 0.4021 |
| VAEQTPLTALYVANLIK                    | 1845.2             | 2            | 5.0091 | 0.4142 |
| VAEQVGIDRGDIPDLSQAPSSLLDALEQHLASLEGK | 3774.1             | 3            | 6.6117 | 0.4097 |
| VAEQVGIDRGDIPDLSQAPSSLLDALEQHLASLEGK | 3902.3             | 3            | 5.3173 | 0.333  |
| VAEVEGEQVDNK                         | 1317.4             | 2            | 4.2708 | 0.3281 |
| VAEVEGEQVDNKAK                       | 1516.6             | 2            | 4.3143 | 0.3092 |
| VAEVLFDAADANAIEEVNLAYENVK            | 2709.0             | 3            | 4.3943 | 0.3408 |
| VAEVLNDPENMEK                        | 1488.6             | 2            | 3.0639 | 0.2422 |
| VAFITGGGTGLGK                        | 1178.4             | 2            | 3.8492 | 0.2767 |
| VAFTGSTVEVGK                         | 1096.2             | 2            | 3.2499 | 0.1237 |
| VAGALAEAGVGLLEIIAK                   | 1598.8             | 2            | 4.7346 | 0.4334 |
| VAGALAEAGVGLLEIIAKQVNVVTK            | 2367.7             | 3            | 4.034  | 0.346  |
| VAGAIIQGGAK                          | 943.1              | 2            | 3.1478 | 0.1919 |
| VAGDIESLLDR                          | 1188.3             | 2            | 3.8861 | 0.3346 |
| VAGGAAPSKPASAK                       | 1212.4             | 2            | 2.798  | 0.2362 |
| VAGGPQMIQLSLDGK                      | 1514.8             | 2            | 3.57   | 0.2262 |
| VAGHPLAQNER                          | 1192.3             | 2            | 3.2542 | 0.3583 |
| VAGHPNIVINNAAGNFISPTER               | 2292.5             | 2            | 6.5127 | 0.4305 |
| VAGHSLGYGFVNYVTAK                    | 1784.0             | 2            | 3.5215 | 0.3222 |
| VAGIESHSELQISR                       | 1526.7             | 2            | 3.9377 | 0.3968 |
| VAGISLAYSSVQDVQK                     | 1665.9             | 2            | 4.1571 | 0.4044 |
| VAGMDVELTVEER                        | 1448.6             | 2            | 3.669  | 0.3492 |

| Peptide Sequence                         | Peptide mass (m/z) | Charge State | Xcorr  | DelCn2 |
|------------------------------------------|--------------------|--------------|--------|--------|
| VAGMLQSFQGK                              | 1166.4             | 2            | 2.8063 | 0.3088 |
| VAGNFHFAPGK                              | 1145.3             | 2            | 2.6349 | 0.1735 |
| VAGNPKPK                                 | 811.0              | 2            | 2.4597 | 0.1372 |
| VAGQDGSVVQFK                             | 1235.4             | 2            | 3.2715 | 0.2588 |
| VAGSVTELIQAAEAMK                         | 1618.9             | 2            | 4.9299 | 0.4626 |
| VAGYAALLEQYQK                            | 1454.7             | 2            | 4.2757 | 0.327  |
| VAHAKEENLSMHQMLDQTLLELNNM                | 2911.3             | 3            | 3.3738 | 0.1224 |
| VAHALAEGLGVIACIGEK                       | 1752.1             | 2            | 6.0472 | 0.4866 |
| VAHALAEGLGVIACIGEKLDER                   | 2265.6             | 2            | 4.9548 | 0.5132 |
| VAHALAEGLGVIACIGEKLDEREAGITEK            | 2994.4             | 3            | 3.8274 | 0.3316 |
| VAHEPVAPPEDKESESEAK                      | 2050.2             | 3            | 3.8887 | 0.3537 |
| VAHEPVAPPEDKESESEAKVDGETASDSESR          | 3284.4             | 3            | 4.0956 | 0.3577 |
| VAHFGYHWSLMER                            | 1633.9             | 2            | 3.0633 | 0.4027 |
| VAHHAENNR                                | 1135.2             | 2            | 3.0717 | 0.247  |
| VAHMEFCYQELCQLAAER                       | 2142.5             | 2            | 3.6    | 0.2491 |
| VAHMETSLGQAR                             | 1300.5             | 2            | 2.7229 | 0.2213 |
| VAHPIRPKPPSATSIPAILK                     | 2094.5             | 2            | 3.1036 | 0.1275 |
| VAHQLQALR                                | 1036.2             | 2            | 2.9674 | 0.2376 |
| VAHSDKPGSTSTASFR                         | 1648.8             | 2            | 3.844  | 0.4026 |
| VAHSFNCTPIEGMLSHQLK                      | 2113.4             | 3            | 3.8383 | 0.3751 |
| VAIAALEVLEEENLAENADKLGILR                | 2808.2             | 3            | 4.7402 | 0.3099 |
| VAIAALEVLEEENLAENADKLGILRNELMK           | 3424.0             | 3            | 6.7076 | 0.4279 |
| VAIAALEVLEEENLAENADKLGILRNELMKLPSDVVTAVR | 4462.2             | 3            | 5.1116 | 0.3958 |
| VAIDNTNPDAASR                            | 1344.4             | 2            | 3.7872 | 0.3999 |
| VAIEHLDK                                 | 925.1              | 2            | 2.94   | 0.1829 |
| VAIEHLDKISDSVLVDIKDTEPLIQTAK             | 3092.5             | 3            | 7.8223 | 0.5478 |
| VAIHYNPPNPAKDNFTFK                       | 2187.5             | 2            | 4.3891 | 0.3522 |
| VAIIIEELVVGYESLTK                        | 1764.1             | 2            | 2.8743 | 0.2167 |
| VAIIHQHLGR                               | 1144.4             | 2            | 2.7835 | 0.2638 |
| VAILVDDMADTCGTICHAADKLLSAGATK            | 2905.4             | 3            | 5.5189 | 0.3372 |
| VAILVDDMADTCGTICHAADKLLSAGATR            | 2933.4             | 3            | 4.9117 | 0.4495 |
| VAIVKPGVPMEIVLNK                         | 1708.1             | 2            | 3.7756 | 0.3499 |
| VAIVKPGVPMEIVLNKESR                      | 2080.5             | 3            | 4.6888 | 0.3425 |
| VAIYKLTGAVMHYGNMKFK                      | 2172.6             | 2            | 3.3926 | 0.1112 |
| VAKENNVDAVHPGYGFLSER                     | 2203.4             | 3            | 4.1542 | 0.3187 |
| VAKEVDPQGQR                              | 1227.4             | 2            | 2.8682 | 0.1643 |

| Peptide Sequence                  | Peptide mass (m/z) | Charge State | Xcorr  | DelCn2 |
|-----------------------------------|--------------------|--------------|--------|--------|
| VAKLDTSQWPLLLK                    | 1612.9             | 2            | 3.4551 | 0.2658 |
| VAKLIIQQCQQLHCLR                  | 1895.3             | 2            | 2.9119 | 0.1016 |
| VAKPVEVDGDEMTR                    | 1677.9             | 2            | 4.4357 | 0.4894 |
| VAKQDAAMK                         | 962.1              | 2            | 2.5672 | 0.1683 |
| VAKVEPAVSSVVNSIQVLTSK             | 2156.5             | 2            | 3.2038 | 0.3557 |
| VALDMTTLTIMR                      | 1365.7             | 2            | 3.4689 | 0.3492 |
| VALEIFQHSK                        | 1172.4             | 2            | 2.4614 | 0.2637 |
| VALENDDRSEEEKYTAVQR               | 2253.4             | 3            | 3.9081 | 0.1163 |
| VALIGDAAHR                        | 1023.2             | 2            | 2.4636 | 0.1533 |
| VALIGSPVDLTYTYDHLGDSPK            | 2362.6             | 2            | 4.7677 | 0.4524 |
| VALILQNVDLPN                      | 1309.5             | 2            | 3.2978 | 0.1671 |
| VALLLLDQGGASPHAAAK                | 1676.0             | 2            | 3.0786 | 0.2204 |
| VALLLLEKEVLDKNDMVELLGPRPFAEK      | 3181.8             | 3            | 6.5775 | 0.4742 |
| VALLSGGGSGHEPAHAGFIGK             | 1963.2             | 2            | 5.3967 | 0.5149 |
| VALNTLAR                          | 858.0              | 2            | 2.6309 | 0.1077 |
| VALNVSCANLLDKDIGSK                | 1861.2             | 2            | 4.3478 | 0.4485 |
| VALQAEKLDHHPWFNVYNK               | 2439.7             | 3            | 4.5415 | 0.4081 |
| VALQFPDQLLGDVAVAAR                | 1955.2             | 2            | 2.8927 | 0.1804 |
| VALRGEDVPLTEQTVSQVLQSAK           | 2469.8             | 2            | 5.1497 | 0.4987 |
| VALRGEDVPLTEQTVSQVLQSAKEQIK       | 2968.4             | 3            | 6.8474 | 0.4326 |
| VALRNDSYTLHK                      | 1417.6             | 3            | 3.9831 | 0.3369 |
| VALSNMNVDRKPYPDENLVEVK            | 2760.1             | 3            | 5.6064 | 0.2933 |
| VALSPAGVQNLVK                     | 1296.5             | 2            | 2.9673 | 0.2245 |
| VALTGLTVAEYFR                     | 1440.7             | 2            | 4.9226 | 0.5025 |
| VALTGLTVAEYFRDQEGQDVLLFIDNIFR     | 3344.8             | 3            | 6.2773 | 0.3839 |
| VALVNDLSLSDVTSTTSSR               | 1853.0             | 2            | 4.225  | 0.5434 |
| VALVTFNSAAHNKPSLIR                | 1939.3             | 2            | 5.0377 | 0.4572 |
| VALVTFNSAAHNKPSLIRDLLDTVLPFLYNETK | 3692.2             | 3            | 3.9483 | 0.2111 |
| VALVYGQMNEPPGAR                   | 1602.8             | 2            | 5.3653 | 0.3575 |
| VAMHILNNGR                        | 1125.3             | 2            | 2.6561 | 0.299  |
| VAMQDATAQMAMLQFISSGLSK            | 2329.7             | 3            | 6.3862 | 0.4942 |
| VAMSHFEPNEYIHVDLLEK               | 2336.6             | 3            | 5.9168 | 0.4149 |
| VANDNAPEHALRPGFLSTFALATDQGSK      | 2929.2             | 3            | 5.1529 | 0.3996 |
| VANDNAPEHALRPGFLSTFALATDQGSKLGLSK | 3427.8             | 3            | 4.0341 | 0.2322 |
| VANAEFILNR                        | 1276.4             | 2            | 2.4372 | 0.1473 |
| VANAEFILSR                        | 1249.4             | 2            | 3.0207 | 0.2108 |

| Peptide Sequence                 | Peptide mass (m/z) | Charge State | Xcorr  | DelCn2 |
|----------------------------------|--------------------|--------------|--------|--------|
| VANHMDGFQR                       | 1175.3             | 2            | 3.0127 | 0.281  |
| VANIIAEVAKNEFMR                  | 1706.0             | 2            | 3.6675 | 0.2469 |
| VANILHDDCAFLSAFGDVSKPER          | 2505.8             | 3            | 6.4396 | 0.5484 |
| VANPKDIIHFFR                     | 1457.7             | 3            | 3.9407 | 0.2089 |
| VANPSGNLTETYVQDR                 | 1764.9             | 2            | 5.0928 | 0.5318 |
| VANREENEILPPDHLNGVKLEMDGHLNR     | 3211.6             | 3            | 3.3687 | 0.2485 |
| VANVSLALYK                       | 1191.4             | 2            | 4.6668 | 0.3567 |
| VAPAEPQEAPDSTAAGGSASK            | 1942.0             | 3            | 4.1847 | 0.4058 |
| VAPAEPQEAPDSTAAGGSASKR           | 2098.2             | 2            | 4.2791 | 0.4192 |
| VAPAPAVVK                        | 852.1              | 1            | 2.6047 | 0.2536 |
| VAPAPAVVKKQEAK                   | 1436.7             | 2            | 2.8223 | 0.1919 |
| VAPDEHPILLTEAPLNPKINR            | 2338.7             | 3            | 3.2469 | 0.1806 |
| VAPEEHPTLLTEAPLNPK               | 1957.2             | 2            | 4.9461 | 0.3995 |
| VAPEEHPVLLTEAPLNPK               | 1955.2             | 2            | 4.6567 | 0.3993 |
| VAPEEHPVLLTEAPLNPKANR            | 2296.6             | 2            | 5.1964 | 0.5014 |
| VAPEEHPVLLTEAPLNPKANREK          | 2553.9             | 2            | 5.0852 | 0.3994 |
| VAPPGLTQIPQIQK                   | 1490.8             | 2            | 2.7291 | 0.2605 |
| VAPSAVLGPNVSIK                   | 1409.7             | 2            | 3.6213 | 0.4048 |
| VAQEKDQLQEQLQALKESLKVTK          | 2656.0             | 3            | 6.1525 | 0.4529 |
| VAQEQQGHPK                       | 1051.1             | 2            | 2.9778 | 0.2387 |
| VAQGVSGAVQDK                     | 1159.3             | 2            | 3.6239 | 0.3153 |
| VAQILKEPK                        | 1026.3             | 2            | 3.1153 | 0.2087 |
| VAQKELEEAVTSALQQETEKSK           | 2447.7             | 3            | 5.0594 | 0.4325 |
| VAQLDQLLHYR                      | 1356.6             | 2            | 3.534  | 0.3627 |
| VAQLEQVYIR                       | 1219.4             | 2            | 3.4304 | 0.2136 |
| VAQPGPLEPEEPR                    | 1419.6             | 2            | 2.9385 | 0.2137 |
| VAQPTITDNKDGTVTVR                | 1816.0             | 2            | 4.0518 | 0.3957 |
| VAQTEFDRQAEVTR                   | 1650.8             | 2            | 3.1963 | 0.1395 |
| VAQVAEITYGQK                     | 1307.5             | 2            | 4.2892 | 0.3137 |
| VARPPAAPELGALGSPDLSSLSLAVSR      | 2633.0             | 3            | 5.1847 | 0.2941 |
| VASEAPLEHKPQVEASSPR              | 2033.2             | 2            | 4.3    | 0.4789 |
| VASGPSPGEGISPQSAQAPQAPGDNHVVPVL  | 2965.2             | 3            | 4.963  | 0.2737 |
| VASGPSPGEGISPQSAQAPQAPGDNHVVPVLR | 3121.4             | 3            | 4.8578 | 0.4046 |
| VASLEESEGNKQDLK                  | 1647.8             | 2            | 4.2675 | 0.2973 |
| VASLLEHHALQLCQQTGR               | 2005.3             | 3            | 3.6726 | 0.1836 |
| VASPGSTIDTAPLSSVDSLINFDSQLGGQAR  | 3233.5             | 3            | 3.9461 | 0.4277 |

| Peptide Sequence                         | Peptide mass (m/z) | Charge State | Xcorr  | DelCn2 |
|------------------------------------------|--------------------|--------------|--------|--------|
| VASPSPSGSVLFTDEGVPK                      | 1875.1             | 2            | 4.4021 | 0.3746 |
| VASSPVMVSNPATR                           | 1416.6             | 2            | 2.9123 | 0.2189 |
| VASVLGTMEMGR                             | 1251.5             | 2            | 3.6867 | 0.4391 |
| VASVSQNAIVSAAGNIAR                       | 1728.9             | 2            | 4.8235 | 0.4403 |
| VASVYEAPGFFLDLEPIPGALDAVR                | 2648.0             | 3            | 4.4537 | 0.226  |
| VATAQDDITGDGTTSNVLIIGELLK                | 2545.8             | 2            | 5.8808 | 0.454  |
| VATAQDDITGDGTTSNVLIIGELLKQADLYISEGLHPR   | 4026.5             | 3            | 3.6479 | 0.2149 |
| VATLNSEEEEDPPTYKDAFPPLPEK                | 2776.0             | 3            | 4.1183 | 0.3552 |
| VATPVDWKDGDSVMVLPTIPEEEAK                | 2728.1             | 3            | 4.6395 | 0.3237 |
| VATPVDWKDGDSVMVLPTIPEEEAKK               | 2856.2             | 3            | 3.7204 | 0.1509 |
| VATPVDWKDGDSVMVLPTIPEEEAKKLFPK           | 3341.9             | 3            | 5.4246 | 0.4058 |
| VATQAVEDVLNIAKR                          | 1627.9             | 2            | 3.6517 | 0.1162 |
| VATWFNQPAR                               | 1190.3             | 2            | 3.1256 | 0.1758 |
| VAVAGCCHGELDKIYETLALAER                  | 2462.8             | 3            | 5.0579 | 0.3701 |
| VAVAIPNRPPDAVLTDTTSLNQAALYR              | 2868.2             | 3            | 5.4083 | 0.4476 |
| VAVATPAK                                 | 756.9              | 1            | 2.1635 | 0.1616 |
| VAVEAKNPADLPK                            | 1352.6             | 2            | 3.2248 | 0.2141 |
| VAVEEVDEEGK                              | 1204.3             | 2            | 3.3151 | 0.3782 |
| VAVEEVDEEGKFVR                           | 1606.8             | 2            | 4.2397 | 0.4995 |
| VAVEYLDPSPEVQK                           | 1574.8             | 2            | 3.7913 | 0.3044 |
| VAVFFSNTPTR                              | 1239.4             | 2            | 2.8654 | 0.2572 |
| VAVGAAAGGAGLR                            | 1070.2             | 2            | 2.598  | 0.2494 |
| VAVIQFSDDPKVEFLLNAHSSKDEVQNAVQR          | 3485.8             | 3            | 7.1308 | 0.4286 |
| VAVLGASGGIGQPLSLLLK                      | 1794.2             | 2            | 6.5468 | 0.4782 |
| VAVLLLAGGGQTR                            | 1255.5             | 2            | 2.5727 | 0.1426 |
| VAVNDAHLLQYNHR                           | 1650.8             | 2            | 4.4696 | 0.416  |
| VAVNGVQLHYQQTGEGDHAVLLLLPGMLGSGETDFGPQLK | 4078.6             | 3            | 4.9333 | 0.305  |
| VAVPLLSSGGQVAVLELR                       | 1809.1             | 2            | 4.1887 | 0.3927 |
| VAVPSTIHCDHLIEAQVGGEKDLR                 | 2588.9             | 3            | 3.6724 | 0.3789 |
| VAVPYSPAAGVDFELESFSER                    | 2271.5             | 2            | 5.1218 | 0.505  |
| VAVQAVQAMNR                              | 1187.4             | 2            | 3.253  | 0.2184 |
| VAVQGDVVR                                | 943.1              | 2            | 2.5206 | 0.1771 |
| VAVTEGCQPSR                              | 1147.3             | 2            | 2.8718 | 0.3791 |
| VAVVAGYGDVGK                             | 1135.3             | 2            | 3.0975 | 0.1851 |
| VAVVDYVEPSPQGTR                          | 1617.8             | 2            | 4.5375 | 0.4608 |
| VAVVGNVDAGK                              | 1029.2             | 2            | 2.6697 | 0.1634 |

| Peptide Sequence                 | Peptide mass (m/z) | Charge State | Xcorr  | DelCn2 |
|----------------------------------|--------------------|--------------|--------|--------|
| VAVVNIQIAR                       | 970.2              | 2            | 2.559  | 0.1567 |
| VAVVQYSDR                        | 1037.2             | 2            | 2.6584 | 0.2802 |
| VAVVQYSGTGQQRPER                 | 1775.9             | 2            | 2.9793 | 0.1809 |
| VAYFQSALDKLNEAIKLAK              | 2123.5             | 3            | 3.5538 | 0.3314 |
| VAYLDPLELSEGK                    | 1434.6             | 2            | 3.5545 | 0.3037 |
| VAYVSFGPHAGK                     | 1233.4             | 2            | 3.7197 | 0.424  |
| VAYVSFGPHAGKLVAIVDVIDQNR         | 2569.9             | 3            | 5.1631 | 0.356  |
| VCALLSCTSHKDYPFHEEF              | 2227.5             | 3            | 4.0244 | 0.2746 |
| VCHAHPTLSEAFR                    | 1468.7             | 2            | 2.8292 | 0.2121 |
| VCLIGCGFSTGYGSAVK                | 1663.0             | 2            | 3.3212 | 0.1505 |
| VCLIGCGFSTGYGSAVNVAK             | 1947.3             | 2            | 3.8762 | 0.2098 |
| VDALEKSNTK                       | 1105.2             | 2            | 3.0744 | 0.2976 |
| VDALIDEIDFLR                     | 1419.6             | 2            | 3.9776 | 0.1376 |
| VDALLSAQPK                       | 1042.2             | 2            | 2.4285 | 0.1236 |
| VDALNDEINFLR                     | 1419.6             | 2            | 4.2464 | 0.149  |
| VDAQFGGIDQR                      | 1206.3             | 2            | 3.5128 | 0.3679 |
| VDATAETDLAK                      | 1134.2             | 2            | 3.0959 | 0.3106 |
| VDATAETDLAKR                     | 1290.4             | 2            | 4.2518 | 0.4384 |
| VDATAETDLAKRFDVSGYPTLK           | 2398.7             | 3            | 3.4904 | 0.1679 |
| VDATEESDLAQQYGVR                 | 1781.9             | 2            | 6.0767 | 0.4653 |
| VDCDQHSDIAQR                     | 1387.5             | 2            | 3.1284 | 0.1995 |
| VDCTANTNTCNKYGVSGYPTLK           | 2350.6             | 3            | 3.7531 | 0.2913 |
| VDDKVNHFHILFNNVDGHLIELDGR        | 2978.3             | 3            | 7.209  | 0.4435 |
| VDDNEETIKK                       | 1191.3             | 2            | 3.0045 | 0.1629 |
| VDDVINVAGHR                      | 1195.3             | 2            | 2.4968 | 0.1564 |
| VDEFVTHNLSFDEINKAFELMHSGK        | 2909.2             | 3            | 4.4448 | 0.1543 |
| VDELTTDLEILKAEIEEK               | 2089.3             | 2            | 3.366  | 0.3303 |
| VDEREKQAALIEEQAR                 | 1902.0             | 2            | 3.4561 | 0.1786 |
| VDEVPDGAVKPPTNKLPIFFFGTHETAFLGPK | 3471.0             | 3            | 3.8659 | 0.2101 |
| VDFNVPMK                         | 950.1              | 2            | 2.6698 | 0.2083 |
| VDFNVPMKNNQITNNQR                | 2033.3             | 3            | 4.4492 | 0.391  |
| VDFPQDQLTALTGR                   | 1561.7             | 2            | 4.6475 | 0.4656 |
| VDGETASDSESR                     | 1253.2             | 2            | 3.1895 | 0.3633 |
| VDGEYDLKVPR                      | 1291.4             | 2            | 2.6399 | 0.1752 |
| VDGHKDIQMPDGIR                   | 1581.8             | 2            | 3.1557 | 0.3116 |
| VDGLSDDHKIETQR                   | 1613.7             | 2            | 3.0658 | 0.1616 |



| Peptide Sequence                    | Peptide mass (m/z) | Charge State | Xcorr  | DelCn2 |
|-------------------------------------|--------------------|--------------|--------|--------|
| VDGNDVFAVYNATK                      | 1513.6             | 2            | 4.4117 | 0.4588 |
| VDHAGEYGANR                         | 1189.2             | 2            | 2.8075 | 0.2969 |
| VDHGAEIITQSPGR                      | 1480.6             | 2            | 4.4777 | 0.4769 |
| VDHQTGPVWGEPTNGQHAFYQLIHQGTK        | 3317.6             | 3            | 6.4819 | 0.5328 |
| VDIDAPDVDVHGPDWHLK                  | 2029.2             | 2            | 4.2996 | 0.4805 |
| VDIDVPDVNIEGPDAK                    | 1696.8             | 2            | 3.062  | 0.2206 |
| VDIGDTIILVH                         | 1358.6             | 2            | 2.8752 | 0.244  |
| VDIIADAAYSIFQKPK                    | 1780.1             | 2            | 3.389  | 0.303  |
| VDISLENPGTSPALEAYSETAK              | 2293.5             | 2            | 3.4943 | 0.2347 |
| VDIVAINDPFIDLNYMVYMFQYDSTHGK        | 3310.7             | 3            | 4.5345 | 0.1201 |
| VDIVAINDPFIDLNYMVYMFQYDSTHGKFGHGTVK | 3980.5             | 3            | 3.9818 | 0.1893 |
| VDKAAAAAAAAALQAK                    | 1299.5             | 2            | 5.2151 | 0.3123 |
| VDKGVVPLAGTDGETTTQGLDGLSER          | 2616.8             | 3            | 6.4346 | 0.2849 |
| VDKGVVPLAGTNGETTTQGLDGLSER          | 2615.8             | 3            | 5.3894 | 0.5617 |
| VDKLDASESLR                         | 1233.4             | 2            | 2.8764 | 0.1819 |
| VDKLYAGLKDLAEER                     | 1720.9             | 2            | 3.4521 | 0.274  |
| VDKSAADGPR                          | 1016.1             | 2            | 2.8455 | 0.2046 |
| VDLDTADFGYAVGEVEALVHEEAEPVTALEK     | 3318.6             | 3            | 4.8693 | 0.3114 |
| VDLFYLHMPDHSTPVEETLR                | 2400.7             | 3            | 3.9267 | 0.1568 |
| VDLGGFAGLFDLK                       | 1352.6             | 2            | 4.6127 | 0.3852 |
| VDLRNYLEGIYNVPVA AVR                | 2162.5             | 3            | 3.9963 | 0.3569 |
| VDLVLEKEVAGLWIK                     | 1713.1             | 2            | 2.7434 | 0.1424 |
| VDLVLLGK                            | 857.1              | 2            | 2.4918 | 0.1062 |
| VDNDENEHQLSLR                       | 1569.6             | 2            | 4.4418 | 0.3237 |
| VDNEFDQR                            | 1023.0             | 2            | 2.7536 | 0.319  |
| VDNEILDYKD LAIPK                    | 1818.1             | 2            | 4.315  | 0.3659 |
| VDNSSLTGESEPQTR                     | 1620.7             | 2            | 4.3708 | 0.3869 |
| VDNSSLTGESEPQTRSPDFTNENPLETR        | 3122.2             | 3            | 6.406  | 0.3885 |
| VDQETLTEMVKPSIDYVR                  | 2124.4             | 2            | 2.4228 | 0.1036 |
| VDQGTLFELILAANYLDIK                 | 2137.5             | 2            | 3.4682 | 0.3631 |
| VDQIQEIVTGNPTVIK                    | 1755.0             | 2            | 3.0439 | 0.2198 |
| VDQSILTGESVSVIK                     | 1575.8             | 2            | 3.5681 | 0.3438 |
| VDSAATSGYEIGNPPDYR                  | 1913.0             | 2            | 5.1117 | 0.4752 |
| VDSFHSTEGK                          | 1236.3             | 2            | 3.1635 | 0.3061 |
| VDSFHSTEGKVG YELKDEIER              | 2568.7             | 3            | 4.8251 | 0.3472 |
| VDSLLENLEKIEKEQSK                   | 2003.2             | 3            | 4.2045 | 0.4177 |

| Peptide Sequence                        | Peptide mass (m/z) | Charge State | Xcorr  | DelCn2 |
|-----------------------------------------|--------------------|--------------|--------|--------|
| VDSTAKVAEIEHAEKEK                       | 1885.1             | 3            | 3.4291 | 0.2942 |
| VDTVNHLADELINSGHSDAATIAEWK              | 2808.0             | 3            | 4.5654 | 0.381  |
| VDVEALENSAGATYIR                        | 1708.9             | 2            | 4.2351 | 0.3732 |
| VDVEFDYDGPLMK                           | 1528.7             | 2            | 4.4009 | 0.4834 |
| VDVEVPDVSLEGPEGK                        | 1669.8             | 2            | 4.1798 | 0.354  |
| VDVFNANSNLSSGPLPIFPLEQLVNKPVEELPEGVDPSR | 4219.7             | 3            | 5.9111 | 0.44   |
| VDVFREDLCTK                             | 1325.5             | 2            | 2.7542 | 0.2689 |
| VDVGKDQEFTVK                            | 1365.5             | 2            | 3.8409 | 0.3384 |
| VDVTEQPGLSGR                            | 1258.4             | 2            | 4.1738 | 0.394  |
| VDYKADEWLMK                             | 1398.6             | 3            | 3.4066 | 0.1907 |
| VDYLVTEEEINLTR                          | 1694.9             | 2            | 3.2035 | 0.1333 |
| VEAALDSR                                | 860.9              | 2            | 2.437  | 0.1609 |
| VEAIKEALMAHGLGNR                        | 1710.0             | 3            | 4.4923 | 0.2891 |
| VEAKPEVQSQPPR                           | 1465.6             | 2            | 3.8151 | 0.3463 |
| VEAQLQELQVK                             | 1285.5             | 2            | 3.5841 | 0.1704 |
| VEAQVYILSK                              | 1150.3             | 2            | 2.6342 | 0.1866 |
| VEDLAWHR                                | 1026.1             | 2            | 2.6196 | 0.1892 |
| VEDYEPYPDDGMGYGDYPK                     | 2211.3             | 2            | 4.1429 | 0.3033 |
| VEDYEPYPDDGMGYGDYPKLPDR                 | 2692.9             | 3            | 3.3876 | 0.2042 |
| VEEASGRPSSVDTLSPALIDSILR                | 2825.2             | 3            | 3.5607 | 0.2228 |
| VEEDDYPSEELLEDEDENAINAK                 | 2423.5             | 2            | 3.0638 | 0.3285 |
| VEEDVASDLVMKVDALLSAQPK                  | 2358.7             | 3            | 4.1216 | 0.2391 |
| VEEEAAQKNMALKK                          | 1589.8             | 2            | 4.3    | 0.2518 |
| VEEEEERNQILQNEK                         | 1888.0             | 3            | 3.3885 | 0.1269 |
| VEEEEERNQILQNEKK                        | 2016.2             | 3            | 3.8363 | 0.1421 |
| VEEHTNAIGTLHGGLTATLVDNISTMALLCTER       | 3612.0             | 3            | 4.7176 | 0.2122 |
| VEEEIQTLSQVLAAK                         | 1658.9             | 2            | 3.9561 | 0.2286 |
| VEEIAASK                                | 846.9              | 1            | 2.5094 | 0.2386 |
| VEEKEGIPPQQQR                           | 1538.7             | 2            | 2.7516 | 0.1228 |
| VEEQEPELTSTPNFVVEVIK                    | 2288.5             | 2            | 5.04   | 0.3759 |
| VEEQEPELTSTPNFVVEVIKNDGK                | 2946.2             | 3            | 4.2525 | 0.3074 |
| VEEVGPYTYR                              | 1213.3             | 2            | 2.4548 | 0.1434 |
| VEFATLQEALAHALTEK                       | 1872.1             | 2            | 3.9399 | 0.298  |
| VEFATLQEALAHALTEKEGKDQELAK              | 2871.2             | 3            | 5.6743 | 0.3863 |
| VEFEELCADLFR                            | 1600.8             | 2            | 4.1788 | 0.4236 |
| VEFLLNAHSSKDEVQNAVQR                    | 2285.5             | 3            | 4.4498 | 0.3749 |

| Peptide Sequence                  | Peptide mass (m/z) | Charge State | Xcorr  | DelCn2 |
|-----------------------------------|--------------------|--------------|--------|--------|
| VEFMDDTSR                         | 1100.2             | 2            | 2.8566 | 0.2562 |
| VEGDLKGPEVDIK                     | 1399.6             | 2            | 2.9945 | 0.1537 |
| VEGDLKGPEVDIKGPK                  | 1681.9             | 2            | 3.531  | 0.2395 |
| VEGFPTIYFAPSGDKK                  | 1757.0             | 2            | 2.4853 | 0.2872 |
| VEGFPTIYFAPSGDKKNPVKFEGGDRDLEHLSK | 3680.1             | 3            | 4.0092 | 0.2725 |
| VEGHVFPEFK                        | 1189.3             | 2            | 2.6771 | 0.1634 |
| VEGIVHPTTAEIDLKEDIGK              | 2165.4             | 2            | 5.0166 | 0.4881 |
| VEGIVHPTTAEIDLKEDIGKALEK          | 2607.0             | 3            | 5.8349 | 0.4678 |
| VEGQATDEKKEPK                     | 1459.6             | 2            | 3.3096 | 0.1453 |
| VEGTEPTTAFNLFVGNLNFNK             | 2313.6             | 2            | 5.0397 | 0.428  |
| VEGTPSDPNPNDDR                    | 1495.5             | 2            | 3.3146 | 0.1602 |
| VEHAVAEGAK                        | 1011.1             | 2            | 2.6572 | 0.1924 |
| VEHNQVGEKTEER                     | 1555.6             | 2            | 3.4779 | 0.3753 |
| VEHSDLSFSK                        | 1149.2             | 2            | 3.0774 | 0.3233 |
| VEHTPDGVK                         | 982.1              | 2            | 2.4248 | 0.1793 |
| VEIAGPGFINVHLR                    | 1522.8             | 2            | 2.9886 | 0.3187 |
| VEIIANDQGNR                       | 1229.3             | 2            | 3.8778 | 0.2388 |
| VEIIANDQGNRITPSYVAFTPEGER         | 2778.0             | 3            | 4.3724 | 0.3428 |
| VEIIANDQGNRITPSYVAFTPEGERLIGDAAK  | 3446.8             | 3            | 5.5347 | 0.4141 |
| VEIKDVKLPVQLQR                    | 1666.0             | 3            | 4.419  | 0.2763 |
| VEILANDQGNR                       | 1229.3             | 2            | 3.6605 | 0.2621 |
| VEILANDQGNRTTPSYVAFTDTER          | 2698.9             | 3            | 5.1376 | 0.3873 |
| VEITYTPSDGTQK                     | 1439.5             | 2            | 3.2978 | 0.1678 |
| VEKDGLILTSR                       | 1231.4             | 2            | 3.5153 | 0.3347 |
| VEKFDLVPVPTNLYGDDFTGDAYVILK       | 3062.5             | 3            | 4.4897 | 0.2901 |
| VEKQVNDAVSK                       | 1217.4             | 2            | 2.6364 | 0.1729 |
| VEKVVVSNR                         | 1030.2             | 2            | 2.6224 | 0.1231 |
| VEKYTISQEAYDQRQDTR                | 2330.5             | 3            | 3.3013 | 0.2633 |
| VELEAKVDALNDEINFLR                | 2089.3             | 2            | 5.4548 | 0.3974 |
| VELESRLGLTDEINFLR                 | 2134.4             | 2            | 2.4274 | 0.147  |
| VELKGTVRPANDFNPDADAK              | 2158.4             | 3            | 4.3069 | 0.3606 |
| VELLERELQELQDSLNAEREK             | 2542.8             | 3            | 5.0217 | 0.1932 |
| VELNALMTDETISNVPILILGNK           | 2498.9             | 3            | 3.3709 | 0.1032 |
| VELPGTAVPSVPEDAAPASR              | 1964.2             | 2            | 4.1111 | 0.4276 |
| VELQELNDR                         | 1116.2             | 2            | 2.708  | 0.1921 |
| VELSDVQNPAISITENVLHFK             | 2354.6             | 3            | 3.2717 | 0.2515 |

| Peptide Sequence          | Peptide mass (m/z) | Charge State | Xcorr  | DelCn2 |
|---------------------------|--------------------|--------------|--------|--------|
| VELSEQQLQLWPSDVKLSPTDNLPR | 3009.3             | 3            | 4.3048 | 0.3229 |
| VELSNGEKR                 | 1032.1             | 2            | 2.6951 | 0.1144 |
| VELVPPTPAEIPR             | 1418.7             | 2            | 3.1941 | 0.3193 |
| VEMLDNLLDIEVAYSLLR        | 2107.5             | 2            | 4.3622 | 0.4646 |
| VENMVDQLLR                | 1217.4             | 2            | 3.2767 | 0.2149 |
| VENQENVSNLVIEDTELK        | 2074.2             | 2            | 5.5052 | 0.4732 |
| VENQENVSNLVIEDTELKQVAYIYK | 2940.3             | 3            | 3.4136 | 0.1585 |
| VEPADASGTEKAFEPATGR       | 1934.1             | 2            | 4.5604 | 0.4435 |
| VEPAVSSVVNSIQVLTSK        | 1858.1             | 3            | 4.9663 | 0.4704 |
| VEPLRNELQKLEDDAKDNQQK     | 2511.7             | 3            | 4.5312 | 0.2169 |
| VEPPLRSVLEQTK             | 1496.7             | 2            | 2.7531 | 0.1188 |
| VEQATKPSFESGR             | 1436.6             | 2            | 3.9439 | 0.3576 |
| VEQHVVVDGK                | 1011.1             | 2            | 2.6611 | 0.2696 |
| VEQHVVVDGKER              | 1296.4             | 2            | 3.5592 | 0.4115 |
| VEQIAAIAQELNELDYDSPSVNAR  | 2810.0             | 3            | 6.1794 | 0.4478 |
| VEQLGAEGNVEESQK           | 1617.7             | 2            | 5.0131 | 0.4117 |
| VEQNAAPSHTK               | 1182.3             | 2            | 2.6858 | 0.2668 |
| VEQVKFDATSMHVKPVAAQQK     | 2470.8             | 3            | 5.6748 | 0.4055 |
| VEQVLSLEPQHELK            | 1649.9             | 2            | 3.8577 | 0.2956 |
| VERADGYEPPVQESV           | 1675.8             | 2            | 3.7358 | 0.3619 |
| VESKINTDVQLDSQEKIGVK      | 2231.5             | 2            | 2.7808 | 0.1068 |
| VESLSQVEVILQHSAAADIAR     | 2166.4             | 3            | 3.3917 | 0.1944 |
| VESVFETLVEDSAEEESTLTK     | 2343.5             | 2            | 5.5568 | 0.4248 |
| VETDAAQAAVQSAFAVLLTQLIK   | 2388.7             | 3            | 3.8688 | 0.2764 |
| VETGILKPGMVVTFAPVNVITTEVK | 2531.0             | 3            | 3.6149 | 0.1381 |
| VETGILRPGMVVTFAPVNITTEVK  | 2573.0             | 3            | 5.4224 | 0.4566 |
| VETGVLKPGMVVTFAPVNVITTEVK | 2517.0             | 2            | 5.5006 | 0.483  |
| VETLRPHVVGSGGNDKEKEEFR    | 2484.7             | 3            | 5.5615 | 0.3809 |
| VETPLEEAIKFLTPLK          | 1829.2             | 2            | 3.5051 | 0.205  |
| VETSDEEIHDLHQR            | 1708.8             | 2            | 4.2441 | 0.3705 |
| VEVDGSIMEGGGQILR          | 1660.9             | 2            | 3.61   | 0.2552 |
| VEVERDNLAEDIMR            | 1689.9             | 3            | 4.1793 | 0.2948 |
| VEVGKDQEFTVDTR            | 1623.7             | 2            | 3.8051 | 0.3766 |
| VEVKEEKPSVSKEEKPSVSK      | 2244.5             | 3            | 4.6129 | 0.2525 |
| VEVRPMMYVALTYDHR          | 1981.3             | 3            | 4.1727 | 0.1068 |
| VEVTEFEDIK                | 1209.3             | 2            | 3.5206 | 0.3179 |

| Peptide Sequence                | Peptide mass (m/z) | Charge State | Xcorr  | DelCn2 |
|---------------------------------|--------------------|--------------|--------|--------|
| VEYSEEELKTHISK                  | 1692.8             | 2            | 4.3599 | 0.3585 |
| VEYSEEELKTHISKGLGK              | 2149.4             | 2            | 5.1149 | 0.4396 |
| VFAARDDEAAVALSSLIHALDDLDMVAIVR  | 3269.7             | 3            | 7.8124 | 0.5424 |
| VFASLPQVER                      | 1146.3             | 2            | 3.2669 | 0.2509 |
| VFDAIMNFKKEETAK                 | 1772.1             | 2            | 3.1854 | 0.2861 |
| VFDEFKPLVEEPQNLIK               | 2046.4             | 3            | 5.5884 | 0.4432 |
| VF DENKEDDLTELSHR               | 1948.0             | 3            | 3.2128 | 0.2956 |
| VFDFTFSPEEMK                    | 1477.7             | 2            | 3.6055 | 0.3751 |
| VFDFTFSPEEMKQLNALNK             | 2259.6             | 3            | 4.1233 | 0.3316 |
| VFDFTFSPEEMKQLNALNKNWR          | 2716.1             | 3            | 3.3618 | 0.2385 |
| VFDGIPPPYDKK                    | 1376.6             | 2            | 3.2628 | 0.2097 |
| VFDHKQGTGGYFR                   | 1675.8             | 3            | 3.3212 | 0.1725 |
| VFDKDGNGYISAAELR                | 1755.9             | 2            | 4.639  | 0.3056 |
| VFDKEGNGTVMGAEIR                | 1723.9             | 2            | 4.5013 | 0.305  |
| VFDKEGNGTVMGAELR                | 1723.9             | 2            | 4.6875 | 0.2958 |
| VFDKLSPLHER                     | 1341.5             | 2            | 3.2196 | 0.2266 |
| VFDPQNDKPSK                     | 1275.4             | 2            | 3.1185 | 0.1683 |
| VFEKTESEKYR                     | 1545.7             | 2            | 3.7158 | 0.3542 |
| VFEFGGPEVLK                     | 1222.4             | 2            | 3.6502 | 0.2744 |
| VFEGNRPTNSIVFTK                 | 1709.9             | 2            | 3.5777 | 0.2162 |
| VFEGPPKPEEPLKR                  | 1623.9             | 2            | 4.0288 | 0.3089 |
| VFEHDSVELNCK                    | 1420.6             | 2            | 3.4533 | 0.2608 |
| VFEHIGKK                        | 958.1              | 2            | 2.6583 | 0.108  |
| VFELMTSLHTK                     | 1306.6             | 2            | 3.4001 | 0.2833 |
| VFESIGKFGLALAVAGGVVNSALYNVDAGHR | 3133.5             | 3            | 4.8232 | 0.3957 |
| VFEVNASNLEK                     | 1250.4             | 2            | 3.8903 | 0.2758 |
| VFEVSLADLQNDEVAFR               | 1953.1             | 2            | 5.5909 | 0.4713 |
| VFEVSLADLQNDEVAFRK              | 2081.3             | 2            | 3.8321 | 0.3613 |
| VFGALKGAVDGGLSIPHSTK            | 1955.2             | 2            | 4.9582 | 0.3836 |
| VFGAPNVVEIDEIDQYLSK             | 2024.2             | 2            | 3.7072 | 0.3535 |
| VFGEHKANDR                      | 1173.3             | 2            | 2.7034 | 0.2213 |
| VFGNEIKLEKPK                    | 1402.7             | 2            | 3.2994 | 0.1223 |
| VFHAGTQQQK                      | 1144.3             | 2            | 2.468  | 0.1717 |
| VFIGKDCIGGCSDLVSLQQSGELLTR      | 2740.2             | 3            | 4.0142 | 0.186  |
| VFIGNLNTALVK                    | 1289.5             | 2            | 2.882  | 0.2008 |
| VFIGNLNTLVVK                    | 1317.6             | 2            | 4.2389 | 0.3311 |

| Peptide Sequence                 | Peptide mass (m/z) | Charge State | Xcorr  | DelCn2 |
|----------------------------------|--------------------|--------------|--------|--------|
| VFIGNLNTLVVKK                    | 1445.8             | 2            | 3.4932 | 0.2757 |
| VFIPHGLIMDRTER                   | 1685.0             | 2            | 2.7406 | 0.1247 |
| VFITDDFHDMMMPK                   | 1596.9             | 2            | 4.4377 | 0.3082 |
| VFKEENQKGDK                      | 1322.4             | 2            | 2.4551 | 0.19   |
| VFKEENQKGDKK                     | 1450.6             | 2            | 3.4656 | 0.211  |
| VFKQPSKPEIVSK                    | 1487.8             | 2            | 3.4911 | 0.3142 |
| VFKVYNEAGVTFT                    | 1475.7             | 2            | 2.9754 | 0.2489 |
| VFLAQK                           | 705.9              | 1            | 2.0053 | 0.1231 |
| VFLDPNILSDDGTVALR                | 1846.1             | 2            | 4.8856 | 0.3958 |
| VFLENVIR                         | 990.2              | 2            | 2.6709 | 0.133  |
| VFLENVIRDAVITYTEHAK              | 2106.4             | 3            | 5.5172 | 0.4299 |
| VFLENVIRDAVITYTEHAKR             | 2262.6             | 3            | 6.1704 | 0.4834 |
| VFLLGEEVAQYDGAYK                 | 1803.0             | 2            | 4.2941 | 0.1459 |
| VFLQNLLSVSQAR                    | 1475.7             | 2            | 3.7568 | 0.2929 |
| VFLSLMETGWFDNLLLDIDKADAIVK       | 2968.5             | 3            | 3.9382 | 0.2345 |
| VFNDMK                           | 753.9              | 1            | 1.947  | 0.1134 |
| VFNDMKVR                         | 1009.2             | 2            | 2.5355 | 0.2272 |
| VFNETPINPR                       | 1187.3             | 2            | 2.5146 | 0.1431 |
| VFNGSGKPIDRGPVVLAEFLDIMGQPINPQCR | 3585.1             | 3            | 4.5492 | 0.2836 |
| VFNTTPDDLHLHVIYDVSHNIAK          | 2627.9             | 2            | 4.7616 | 0.4038 |
| VFNVFCLYGNVEK                    | 1532.8             | 2            | 4.7994 | 0.4002 |
| VFNVTKENR                        | 1107.2             | 2            | 2.4732 | 0.2116 |
| VFNyntler                        | 1156.3             | 2            | 2.8065 | 0.1866 |
| VFPDKEVMLDAALALAAEISSK           | 2319.7             | 2            | 5.1628 | 0.4518 |
| VFPDKEVMLDAALALAAEISSKSPVAVQSTK  | 3217.7             | 3            | 6.1421 | 0.4989 |
| VFPGSTTEDYNLIVIER                | 1954.2             | 2            | 5.0521 | 0.409  |
| VFQFLNAK                         | 967.1              | 2            | 3.1493 | 0.2776 |
| VFQSLPHENKPLTLSNYQTNK            | 2459.7             | 3            | 5.1349 | 0.3964 |
| VFQSSANYAENFIQSIISTVEPAQR        | 2801.1             | 2            | 4.0992 | 0.3614 |
| VFQTEAELQEVISDLQSK               | 2065.3             | 2            | 5.8656 | 0.363  |
| VFQVEYAMK                        | 1115.3             | 2            | 3.0588 | 0.209  |
| VFSGLVSTGLK                      | 1108.3             | 2            | 3.0937 | 0.3326 |
| VFSGLVSTGLKVR                    | 1363.6             | 2            | 3.532  | 0.2839 |
| VFSNGADLSGVTEEAPLK               | 1835.0             | 2            | 5.6787 | 0.4094 |
| VFSNGADLSGVTEEAPLKLSK            | 2163.4             | 2            | 5.2162 | 0.448  |
| VFSVAITPDHLEPR                   | 1581.8             | 2            | 3.4817 | 0.3942 |

| Peptide Sequence                    | Peptide mass (m/z) | Charge State | Xcorr  | DelCn2 |
|-------------------------------------|--------------------|--------------|--------|--------|
| VFSVTHIK                            | 931.1              | 2            | 2.6395 | 0.1284 |
| VFTAITKHPDEK                        | 1386.6             | 2            | 3.2296 | 0.205  |
| VFTESEDRTASAEIKAFAFEKELSHATIDSK     | 3370.6             | 3            | 5.0089 | 0.4077 |
| VFTTQELVQAFTHAPATLEADR              | 2446.7             | 3            | 4.7981 | 0.4092 |
| VFTTQELVQAFTHAPATLEADRGGK           | 2689.0             | 3            | 5.2475 | 0.4449 |
| VFVDGHQLDFDYHR                      | 1781.0             | 2            | 3.141  | 0.3478 |
| VFVGGLSPDTSEEQIKEYFGAFGEIENIELPMDTK | 3892.3             | 3            | 5.1918 | 0.3883 |
| VFVHYTGWLLDGTK                      | 1636.9             | 2            | 3.1555 | 0.4183 |
| VFVQKEILDKFTEEVVK                   | 2052.4             | 3            | 5.2419 | 0.3315 |
| VFVQKEILDKFTEEVVKQTR                | 2565.9             | 3            | 5.4605 | 0.3369 |
| VFYELQHSDKPVGTK                     | 1749.0             | 2            | 4.1999 | 0.3418 |
| VFYSITGQGADTPPVGVFIER               | 2367.7             | 2            | 3.9626 | 0.3287 |
| VGAAEEELQK                          | 1074.2             | 2            | 3.2061 | 0.1833 |
| VGAAEEELQKSR                        | 1317.4             | 2            | 3.2304 | 0.1909 |
| VGAEDADGIDMAYR                      | 1483.6             | 2            | 4.6872 | 0.3818 |
| VGAENVAIVPSEK                       | 1470.6             | 2            | 3.6371 | 0.3463 |
| VGAGAPVYLAHVLEYLTAIELELAGNAARDNKK   | 3402.9             | 3            | 5.8328 | 0.4577 |
| VGAGAPVYMAAVLEYLTAIELELAGNAAR       | 2935.4             | 3            | 6.2954 | 0.4813 |
| VGAGAPVYMAAVLEYLTAIELELAGNAARDNK    | 3292.8             | 3            | 4.359  | 0.41   |
| VGAGAPVYMAAVLEYLTAIELELAGNAARDNKK   | 3420.9             | 3            | 5.2232 | 0.4864 |
| VGAGSRPKPEAPMAK                     | 1496.8             | 2            | 2.6664 | 0.1094 |
| VGAHAGEYGAEALER                     | 1530.6             | 2            | 3.9937 | 0.4497 |
| VGAIPANALDDGQWSQGLISAAR             | 2311.5             | 3            | 5.1484 | 0.5825 |
| VGATAAVYSAAILEYLTAEVLELAGNASK       | 2897.3             | 3            | 5.7438 | 0.1516 |
| VGATAAVYSAAILEYLTAEVLELAGNASKDLK    | 3253.7             | 3            | 4.346  | 0.128  |
| VGATAAVYSAAILKYLTAEVLELAGNASK       | 2896.3             | 3            | 5.2761 | 0.5274 |
| VGATAAVYSAAILKYLTAEVLELAGNASKDLK    | 3252.7             | 3            | 3.9542 | 0.4598 |
| VGAVDADKHHSLLGGQYGVQGFPTIK          | 2582.9             | 3            | 6.7878 | 0.5193 |
| VGDAIPAVEVFEGEPGNK                  | 1829.0             | 2            | 4.5714 | 0.3266 |
| VGDAIPAVEVFEGEPGNKVNLAELFK          | 2744.1             | 2            | 4.1705 | 0.4207 |
| VGDKGTQLSGGQK                       | 1275.4             | 2            | 2.4261 | 0.1067 |
| VGDKIATR                            | 860.0              | 2            | 2.973  | 0.1945 |
| VGDKVLLPEYGGTK                      | 1476.7             | 2            | 4.3277 | 0.3455 |
| VGDKVLLPEYGGTKVVLDDKDYFLFR          | 2988.4             | 3            | 3.7045 | 0.2789 |
| VGDPQELNGITR                        | 1299.4             | 2            | 3.484  | 0.3918 |
| VGDAQILLAIKGQK                      | 1383.7             | 2            | 3.3334 | 0.2439 |

| Peptide Sequence                      | Peptide mass (m/z) | Charge State | Xcorr  | DelCn2 |
|---------------------------------------|--------------------|--------------|--------|--------|
| VGDSPIPGAGAYADDTAGAAAATGNGDILMR       | 2877.1             | 3            | 5.4952 | 0.3608 |
| VGDSSTGAAAHK                          | 1101.2             | 2            | 2.8687 | 0.2379 |
| VGDSTPVSEKPVSAAVDANASESP              | 2315.4             | 2            | 4.5498 | 0.4148 |
| VGDTLDLLIGEDKEAGTETVMR                | 2363.6             | 2            | 2.6012 | 0.1123 |
| VGDTSLDPNDFDFTVTGR                    | 1957.0             | 2            | 5.1946 | 0.4102 |
| VGDVQQQESESQ LPTK                     | 1702.8             | 2            | 4.529  | 0.3683 |
| VGDVYIPR                              | 919.1              | 2            | 2.7217 | 0.2442 |
| VGDYGSLSGR                            | 1011.1             | 2            | 3.8662 | 0.3439 |
| VGDYVYFENSSSNPYLIR                    | 2124.3             | 2            | 5.0799 | 0.3963 |
| VGDYVYFENSSSNPYLVR                    | 2110.3             | 2            | 5.8062 | 0.4917 |
| VGEAIETTQR                            | 1104.2             | 2            | 3.0086 | 0.1291 |
| VGEATETALTCLVEK                       | 1564.8             | 2            | 2.5659 | 0.1978 |
| VGEEDDEAAEAEAEAEER                    | 2164.1             | 2            | 7.1824 | 0.5091 |
| VGEEDDEAAEAEAEAEERAR                  | 2391.4             | 2            | 4.6083 | 0.33   |
| VGEFSGANK                             | 909.0              | 2            | 2.4292 | 0.143  |
| VGEFSGANKEK                           | 1166.3             | 2            | 2.5468 | 0.1229 |
| VGEFSGANKEKLEATINELV                  | 2149.4             | 2            | 2.8051 | 0.1671 |
| VGEIFSAAGAAFTK                        | 1369.5             | 2            | 4.2765 | 0.4821 |
| VGELKDDDFER                           | 1323.4             | 2            | 2.5279 | 0.1508 |
| VGELKDDDFERISELGAGNGGVVTK             | 2606.8             | 3            | 4.59   | 0.3328 |
| VGELTNLTQIELR                         | 1486.7             | 2            | 2.5328 | 0.1319 |
| VGENADSQIK                            | 1061.1             | 2            | 3.6043 | 0.2931 |
| VGEPGQAGNPALVSAYGTGLEGGTTGIQSEFFINTTR | 3699.0             | 3            | 5.3326 | 0.4198 |
| VGEPKGYPPEDIFNLVGKK                   | 2088.4             | 3            | 4.9824 | 0.2668 |
| VGEPVALSEEERLK                        | 1556.7             | 2            | 3.8839 | 0.3459 |
| VGEPVALSEEERLKLAQQQAALLMQQEER         | 3295.7             | 3            | 6.8803 | 0.5525 |
| VGEQAQVVIIDMNDPSNPIRRPISADSAIMNPASK   | 3736.2             | 3            | 4.8397 | 0.3341 |
| VGERQPLLGPPEMREHVVAASK                | 2488.9             | 3            | 4.392  | 0.3932 |
| VGESVFHTTR                            | 1133.2             | 2            | 3.3692 | 0.393  |
| VGETAPPNAYTVTDLVEYSIVIQQLSNGK         | 3108.4             | 3            | 4.4599 | 0.2559 |
| VGETIIDLENR                           | 1259.4             | 2            | 2.5683 | 0.2645 |
| VGEVCHITCKPEYAYGSAGSPPK               | 2394.7             | 3            | 4.3651 | 0.3944 |
| VGEVIVTK                              | 845.0              | 2            | 2.5477 | 0.1999 |
| VGEVIVTKDDAMLLK                       | 1632.0             | 2            | 4.6734 | 0.467  |
| VGEVIVTKDDAMLLKGGKGDKAQIEKR           | 2843.3             | 3            | 5.6884 | 0.4553 |
| VGEVTVVELFKDAEGK                      | 1785.0             | 2            | 4.3259 | 0.4764 |



| Peptide Sequence                          | Peptide mass (m/z) | Charge State | Xcorr  | DelCn2 |
|-------------------------------------------|--------------------|--------------|--------|--------|
| VGEVTYVELLMDAEGK                          | 1754.0             | 2            | 5.2002 | 0.472  |
| VGEYSLYIGR                                | 1157.3             | 2            | 3.4972 | 0.3019 |
| VGFAEAAR                                  | 820.9              | 2            | 2.6237 | 0.242  |
| VGFDKWPFFMTTHTWGEDAR                      | 2282.5             | 3            | 3.919  | 0.3039 |
| VGFAQYEGTYKVVNPHKL                        | 2067.3             | 3            | 3.3932 | 0.3052 |
| VGGAGNKIIQLIEGK                           | 1497.8             | 2            | 4.1477 | 0.1691 |
| VGGERFEAPEALFQPHLINVEGVGVAELLFNTIQAADIDTR | 4438.9             | 3            | 3.874  | 0.3692 |
| VGGHLRPGIVQSGGVVR                         | 1689.0             | 3            | 3.7305 | 0.3075 |
| VGGRLEDTKLIK                              | 1329.6             | 3            | 3.3899 | 0.1593 |
| VGGSGVNVNAK                               | 1002.1             | 2            | 3.0283 | 0.2904 |
| VGGSSVDLHR                                | 1027.1             | 2            | 3.4715 | 0.3733 |
| VGGTKPAGGDFGEVLNSAANASATTTEPLPEK          | 3088.3             | 3            | 4.8567 | 0.3817 |
| VGGTKPAGGDFGEVLNSAANASATTTEPLPEKTQES      | 3533.8             | 3            | 5.838  | 0.4243 |
| VGGTKPAGGDFGEVLNSAANASATTTEPLPEKTQESL     | 3646.9             | 3            | 7.0756 | 0.4802 |
| VGGTSDVEVNEK                              | 1234.3             | 2            | 3.9864 | 0.4039 |
| VGGTSDVEVNEKK                             | 1362.5             | 2            | 4.1299 | 0.2906 |
| VGGTSDVEVNEKKDR                           | 1633.7             | 2            | 4.2065 | 0.429  |
| VGGTSDVEVNEKKDRVTDALNATR                  | 2575.8             | 3            | 4.9567 | 0.3995 |
| VGGVGPADTHEPLRPEAEPGELER                  | 2513.7             | 3            | 3.3569 | 0.2654 |
| VGGVQSLGGTGALR                            | 1272.4             | 2            | 3.275  | 0.4027 |
| VGGYILGEFGNLIAGDPR                        | 1849.1             | 2            | 2.9615 | 0.2143 |
| VGHSELVGEIIR                              | 1309.5             | 2            | 3.4161 | 0.3869 |
| VGHSELVGEIIRLEGDMATIQVYEETSGVSVGDPVLR     | 3957.4             | 3            | 4.8709 | 0.4399 |
| VGHSIRHPDVEVDGFSELR                       | 2150.3             | 2            | 4.361  | 0.4267 |
| VGHSTAHDDEIIPMSIR                         | 1764.0             | 2            | 4.5548 | 0.4867 |
| VGIADGHR                                  | 824.9              | 2            | 2.8707 | 0.1937 |
| VGIGAFPTEQDNEIGELLQTR                     | 2288.5             | 2            | 5.1697 | 0.3209 |
| VGIGRPAHPEAVQAHVLCFSPAEQELLPLLLDR         | 3635.2             | 3            | 4.0819 | 0.3242 |
| VGIIAWHPTAR                               | 1221.4             | 2            | 2.8632 | 0.2363 |
| VGINYQPPTVVPGGDLAK                        | 1826.1             | 2            | 4.6736 | 0.4686 |
| VGIPKETPALTINR                            | 1509.8             | 2            | 2.4951 | 0.2784 |
| VGISPKDLR                                 | 985.2              | 2            | 3.1136 | 0.1764 |
| VGIVAWHPTAR                               | 1207.4             | 2            | 2.6357 | 0.1709 |
| VGIVGNLASGK                               | 1015.2             | 2            | 2.5495 | 0.1682 |
| VGKETVQTTEDQILKR                          | 1846.1             | 2            | 5.8866 | 0.4291 |
| VGKGEPGAAPLSAPAFSLVFPFLK                  | 2401.8             | 3            | 5.4606 | 0.4171 |

| Peptide Sequence                | Peptide mass (m/z) | Charge State | Xcorr  | DelCn2 |
|---------------------------------|--------------------|--------------|--------|--------|
| VGKVEHGSVALPAIMR                | 1665.0             | 3            | 5.0193 | 0.4858 |
| VGLADLHPDVFATAPR                | 1679.9             | 3            | 4.193  | 0.3381 |
| VGLFHSDR                        | 931.0              | 2            | 2.5854 | 0.2774 |
| VGLGLGYLELPQINYK                | 1778.1             | 2            | 3.9898 | 0.3673 |
| VGLKAPGIIPR                     | 1121.4             | 2            | 3.1904 | 0.2463 |
| VGLPLLSPEFLLTGVLK               | 1797.2             | 2            | 2.7284 | 0.1907 |
| VGLQVVAVK                       | 913.1              | 2            | 3.2169 | 0.2549 |
| VGLQVVAVKAPGFGDNR               | 1728.0             | 3            | 4.2097 | 0.3153 |
| VGLVASQKNDLDAVALMHPDGSVAVVVVLNR | 3089.6             | 3            | 5.4889 | 0.3306 |
| VGLVQFSDTPVTEFSLNTYQTK          | 2475.7             | 3            | 4.661  | 0.4168 |
| VG MEDMGHH                      | 1013.1             | 2            | 2.444  | 0.1458 |
| VGMQQMFALGER                    | 1367.6             | 2            | 3.2667 | 0.2676 |
| VGMRHYHLK                       | 1141.4             | 2            | 2.4829 | 0.2015 |
| VGN GFEEGTTQG PLINEK            | 1891.0             | 2            | 4.9349 | 0.3961 |
| VGN GHSNEAALILHR                | 1588.8             | 3            | 3.7374 | 0.369  |
| VGNHTAEGTGTNK                   | 1286.3             | 2            | 3.6186 | 0.292  |
| VGNHTAEGTGTNKK                  | 1414.5             | 2            | 3.8195 | 0.3021 |
| VGNIEIKDLMVGDEASELR             | 2089.4             | 2            | 4.3718 | 0.4299 |
| VGNIIDTMITDAFLK                 | 1651.9             | 2            | 4.9637 | 0.4293 |
| VGNIIDTMITDAFLKADDYIEITGAGGKK   | 3071.5             | 3            | 4.4827 | 0.3466 |
| VGNKYRLGR                       | 1063.2             | 2            | 2.5709 | 0.1029 |
| VGNLGLATSFFNEK                  | 1497.7             | 2            | 4.4201 | 0.497  |
| VGNLGLATSFFNER                  | 1525.7             | 2            | 4.3119 | 0.4014 |
| VGNLTVVGKEPESILQVLSQMEK         | 2499.9             | 2            | 4.4811 | 0.3914 |
| VGNLTVVGKEPESILQVLSQMEKIVR      | 2868.4             | 3            | 3.518  | 0.2396 |
| VGNMSESELGR                     | 1179.3             | 2            | 3.0953 | 0.3693 |
| VGNPWPDPNVLYG PLHTK             | 1908.1             | 3            | 3.9832 | 0.3516 |
| VGNQIFQSR                       | 1049.2             | 2            | 3.0431 | 0.1515 |
| VGNVEYFGLGN SPGFPLQYYPY YGK     | 2831.1             | 3            | 4.3532 | 0.2845 |
| VGNVGQTNYAASK                   | 1309.4             | 2            | 3.7652 | 0.4252 |
| VGPDVVTDPAFLVTR                 | 1586.8             | 2            | 2.6936 | 0.212  |
| VGPVAATYPMLNK                   | 1361.6             | 2            | 3.446  | 0.4052 |
| VGPVSHHR                        | 889.0              | 2            | 2.6121 | 0.2062 |
| VGQADDSTKPTNK                   | 1361.4             | 2            | 3.6693 | 0.2611 |
| VGQASEIAR                       | 931.0              | 2            | 2.44   | 0.2308 |
| VGQAVDVVGQAGKPK                 | 1453.7             | 2            | 5.0758 | 0.3716 |

| Peptide Sequence                 | Peptide mass (m/z) | Charge State | Xcorr  | DelCn2 |
|----------------------------------|--------------------|--------------|--------|--------|
| VGQDPVLR                         | 884.0              | 2            | 2.6895 | 0.1224 |
| VGQEIEVRPGIVSK                   | 1511.7             | 2            | 3.6248 | 0.3404 |
| VGQISFDLPR                       | 1132.3             | 2            | 2.9174 | 0.3005 |
| VGQLSEGAIAAIMQK                  | 1516.8             | 2            | 4.9461 | 0.3682 |
| VGQTAFDVADEDILGYLEELQK           | 2454.7             | 2            | 5.4799 | 0.4427 |
| VGQTAFDVADEDILGYLEELQKKQNLLHSEKR | 3689.1             | 3            | 3.7209 | 0.3253 |
| VGQYVVDLTSFEQLALPVLR             | 2248.6             | 2            | 4.4487 | 0.4502 |
| VGRPSNIGQAQPIIDQLAEEAR           | 2363.6             | 3            | 4.338  | 0.3475 |
| VGSAADIPINISSETDLSLLTATVVPPSGR   | 2895.3             | 2            | 4.6207 | 0.4463 |
| VGSAKPGLQK                       | 985.2              | 2            | 3.2322 | 0.1546 |
| VGSEIER                          | 789.9              | 1            | 1.8126 | 0.1009 |
| VGSGDTNNFPYLEK                   | 1541.6             | 2            | 4.7583 | 0.3765 |
| VGSHEQPSGATLQR                   | 1467.6             | 2            | 3.5376 | 0.1678 |
| VGSHITGGDIYGIVSENSLIK            | 2160.4             | 2            | 6.2067 | 0.5506 |
| VGSHITGGDIYGIVSENSLIKHK          | 2425.7             | 3            | 5.4699 | 0.4981 |
| VGSHPEGGASWLSTAAFLSR             | 2145.3             | 2            | 5.0267 | 0.464  |
| VGSLDNAHHVPGGGNVK                | 1658.8             | 2            | 3.8512 | 0.3821 |
| VGSLDNAHHVPGGGNVKIDSQK           | 2230.4             | 2            | 4.2701 | 0.3002 |
| VGSLDNVGHLPAGGAVK                | 1591.8             | 2            | 4.8224 | 0.4132 |
| VGSLGLPAHPR                      | 1104.3             | 2            | 3.2934 | 0.3323 |
| VGSSGDIALHINPR                   | 1436.6             | 2            | 3.8979 | 0.3929 |
| VGSTENIKHQPGGGR                  | 1537.7             | 2            | 4.1694 | 0.3986 |
| VGSTKVPMTSGVK                    | 1291.5             | 2            | 2.6374 | 0.2164 |
| VGSTSENITQK                      | 1164.2             | 2            | 3.1083 | 0.3115 |
| VGTAQLALVAR                      | 1099.3             | 2            | 3.1175 | 0.2594 |
| VGTDKTGVKSEGST                   | 1366.5             | 2            | 2.5081 | 0.1894 |
| VGTEGLVDSFSQGLER                 | 1694.8             | 2            | 2.5054 | 0.1032 |
| VGTGEPCCDWVGDEGAGHFVK            | 2164.4             | 2            | 3.673  | 0.2156 |
| VGTLVGEDKYGNKYEDNKQFFGR          | 2829.1             | 3            | 3.9437 | 0.3278 |
| VGVDGFGR                         | 806.9              | 2            | 2.7283 | 0.3425 |
| VGVDPLIPTDYWK                    | 1616.9             | 2            | 3.1513 | 0.1864 |
| VGVEVPDVNIEGPEGK                 | 1638.8             | 2            | 3.3613 | 0.2543 |
| VGVGTSFGLPQTR                    | 1319.5             | 2            | 2.9901 | 0.2485 |
| GVVIGFPNVGK                      | 1087.3             | 2            | 2.8481 | 0.1015 |
| GVVKPVGSDPDFQPELSGAGSR           | 2200.4             | 2            | 5.2916 | 0.5008 |
| GVVLAASMEAK                      | 1076.3             | 2            | 3.156  | 0.3484 |

| Peptide Sequence                   | Peptide mass (m/z) | Charge State | Xcorr  | DelCn2 |
|------------------------------------|--------------------|--------------|--------|--------|
| VGVNGDHHGPGNQYLK                   | 1692.8             | 2            | 2.5982 | 0.108  |
| VGVNGFGR                           | 805.9              | 2            | 2.4704 | 0.1078 |
| VGVPVLDLDAQGR                      | 1327.5             | 2            | 2.5734 | 0.3206 |
| VGVSQQPEDSQQDLPGER                 | 1970.0             | 2            | 5.275  | 0.3918 |
| VGVVQFSNDVFPEFYLK                  | 1989.3             | 2            | 5.9405 | 0.4912 |
| VGWEQLLTTIAR                       | 1387.6             | 2            | 4.4547 | 0.3563 |
| VGWSVDFSRPQLGEDEFSGFDGR            | 2751.9             | 3            | 3.3709 | 0.1376 |
| VGYHLEDPLFHLESPR                   | 1910.1             | 3            | 3.2098 | 0.1891 |
| VHAASVNPIDVNMR                     | 1523.7             | 2            | 3.5047 | 0.3691 |
| VHACGVNPVETYIR                     | 1558.8             | 2            | 3.2963 | 0.2337 |
| VHAELADVLTEAVVDSILAIK              | 2207.6             | 2            | 7.7979 | 0.6307 |
| VHAELADVLTEAVVDSILAIKK             | 2335.7             | 3            | 4.9322 | 0.4354 |
| VHAEQVLNDKESHIK                    | 1747.9             | 2            | 5.169  | 0.4918 |
| VHAIQCDVRDPMVQNTVSELIK             | 2612.0             | 3            | 4.1494 | 0.4371 |
| VHATSTYR                           | 935.0              | 1            | 2.1723 | 0.2249 |
| VHAYIISYLKK                        | 1335.6             | 3            | 3.2858 | 0.139  |
| VHDSQKPDQDKLSKEDVLSFIQMHR          | 3110.5             | 3            | 4.5353 | 0.3221 |
| VHEELRNLGLYVK                      | 1570.8             | 2            | 3.7953 | 0.3943 |
| VHEKDNGDIK                         | 1155.2             | 2            | 2.5204 | 0.214  |
| VHELKEHNGQVTGIDWAPESNR             | 2517.7             | 3            | 5.2638 | 0.4457 |
| VHELNEEIGK                         | 1168.3             | 2            | 3.277  | 0.1594 |
| VHELNEEIGKLLAK                     | 1593.8             | 2            | 4.2925 | 0.4396 |
| VHEMEKEHLNK                        | 1394.6             | 2            | 3.6866 | 0.2336 |
| VHEYNVLLETLSR                      | 1573.8             | 2            | 4.721  | 0.4494 |
| VHFEESKLEDLLR                      | 1702.9             | 3            | 3.9771 | 0.4405 |
| VHFEESKLEDLLRK                     | 1831.1             | 2            | 2.9223 | 0.2319 |
| VHFFTQDHKPSNPLEK                   | 1925.1             | 2            | 2.9797 | 0.3469 |
| VHFITDTLSKGETK                     | 1576.8             | 2            | 3.7464 | 0.3894 |
| VHFTAER                            | 860.0              | 1            | 1.8185 | 0.1172 |
| VHGIKNGGVKPNIIPSYSELIYYFR          | 2979.5             | 3            | 3.4762 | 0.166  |
| VHGLLK                             | 666.8              | 1            | 1.696  | 0.1009 |
| VHGPGIQSGTTNKPNK                   | 1635.8             | 2            | 4.0657 | 0.4271 |
| VHGPGIQSGTTNKPNKFTVETR             | 2369.6             | 2            | 5.523  | 0.4549 |
| VHHEPQLSDK                         | 1190.3             | 2            | 2.6188 | 0.2509 |
| VHHEPQLSDKVHNDAAQSFQDHDHDAFLGAEAAK | 3651.8             | 3            | 5.2396 | 0.3483 |
| VHHPDYNNELTQFLPR                   | 1981.2             | 3            | 3.599  | 0.3008 |

| Peptide Sequence                  | Peptide mass (m/z) | Charge State | Xcorr  | DelCn2 |
|-----------------------------------|--------------------|--------------|--------|--------|
| VHIDIGADGR                        | 1053.2             | 2            | 3.1467 | 0.2999 |
| VHIEIGPDGR                        | 1093.2             | 2            | 3.058  | 0.2354 |
| VHIGQVIMSIR                       | 1253.5             | 3            | 3.371  | 0.3094 |
| VHKEDDGVVICQVEHPAVTGNLQTQR        | 2971.3             | 3            | 5.5682 | 0.3943 |
| VHKQELELLNNELLK                   | 1821.1             | 2            | 4.1921 | 0.3324 |
| VHLAEKGDGAELIWDKDDPSAMDFV TSAANLR | 3473.8             | 3            | 6.15   | 0.4794 |
| VHLASHAGELPFR                     | 1434.6             | 2            | 3.3524 | 0.2721 |
| VHLDIQVGEHANDYAEIAAK              | 2194.4             | 2            | 3.3167 | 0.3362 |
| VHLDIQVGEHANDYAEIAAKDKLSELQLR     | 3277.6             | 3            | 3.9845 | 0.2907 |
| VHLDIQVGEHANNYPEIAAK              | 2219.4             | 3            | 6.0092 | 0.4607 |
| VHLDKAQQNNVEHK                    | 1660.8             | 2            | 5.0567 | 0.3564 |
| VHLDKAQQNNVEHKVETFSGVYK           | 2671.9             | 3            | 5.2291 | 0.4765 |
| VHLDKAQQNNVEHKVETFSGVYKK          | 2800.1             | 3            | 5.5049 | 0.4864 |
| VHLIGHSLGAHVAGEAGSK               | 1841.1             | 2            | 4.1111 | 0.3789 |
| VHLMNPMVPGLTGSK                   | 1581.9             | 2            | 3.6336 | 0.3259 |
| VHLVGIDIFTGK                      | 1299.5             | 3            | 4.2919 | 0.3604 |
| VHLVGIDIFTGKK                     | 1427.7             | 2            | 4.3005 | 0.3584 |
| VHMFEAHSYIR                       | 1505.7             | 2            | 3.7088 | 0.4092 |
| VHMTWVQPR                         | 1154.4             | 2            | 2.6719 | 0.3471 |
| VHNDAQSFDYDHDAFLGAE EAK           | 2480.5             | 3            | 4.4886 | 0.3131 |
| VHNGMDDLILDGHNILDGLR              | 2218.5             | 3            | 4.2983 | 0.4377 |
| VHPEIINENGNPSYK                   | 1711.9             | 2            | 4.5331 | 0.3985 |
| VHPVSTMIK                         | 1012.3             | 1            | 2.2356 | 0.2554 |
| VHQAAPLSDAPHDDAHGNFQYDHEAFLGR     | 3217.4             | 3            | 4.4109 | 0.3726 |
| VHQILEGSNEVMR                     | 1512.7             | 2            | 4.1759 | 0.3103 |
| VHQLDVAIPLHLK                     | 1483.8             | 2            | 2.4448 | 0.2088 |
| VHQLETQNR                         | 1125.2             | 2            | 2.9784 | 0.1236 |
| VHQLYETIQR                        | 1287.4             | 2            | 2.8137 | 0.2673 |
| VHRDGPALSGPQSR                    | 1477.6             | 2            | 3.0789 | 0.2769 |
| VHSDEDNPER                        | 1198.2             | 2            | 2.864  | 0.2965 |
| VHSFPTLK                          | 929.1              | 1            | 1.8559 | 0.197  |
| VHSFTHEAPNQR                      | 1423.5             | 2            | 3.5094 | 0.3942 |
| VHSVAVIGAPFSQGQK                  | 1625.9             | 2            | 4.7611 | 0.493  |
| VHTECCHGDLLECADDRADLAK            | 2415.7             | 3            | 3.5081 | 0.2502 |
| VHTGFDQHEQK                       | 1326.4             | 2            | 2.7362 | 0.1677 |
| VHTGFDQHEQKFTGLPR                 | 1998.2             | 2            | 2.9256 | 0.3269 |

| Peptide Sequence                        | Peptide mass (m/z) | Charge State | Xcorr  | DelCn2 |
|-----------------------------------------|--------------------|--------------|--------|--------|
| VHTVEDYQAIVDAEWNILYDKLEK                | 2893.2             | 3            | 3.8497 | 0.1786 |
| VHVGDEDFVHLR                            | 1423.6             | 2            | 4.119  | 0.449  |
| VHVIFNYK                                | 1020.2             | 1            | 2.8224 | 0.191  |
| VHVSEEGTEPEAMLQVLGPK                    | 2151.4             | 2            | 3.7015 | 0.2314 |
| VHVSEEGTEPEAMLQVLGPKPALPAGTEDTAK        | 3303.7             | 3            | 3.2974 | 0.1923 |
| VHVSEEGTEPEAMLQVLGPKPALPAGTEDTAKEDAANR  | 3960.3             | 3            | 6.1298 | 0.4626 |
| VHVSEEGTEPEAMLQVLGPKPALPAGTEDTAKEDAANRK | 4088.5             | 3            | 5.8912 | 0.4908 |
| VHVSGAR                                 | 725.8              | 1            | 1.6592 | 0.1164 |
| VHVTQEDFEMAVAK                          | 1604.8             | 2            | 2.9779 | 0.3403 |
| VHVVDLKAESVAAPITVR                      | 1905.2             | 3            | 3.5301 | 0.2719 |
| VHYENNSPFLTITSMTR                       | 2011.2             | 3            | 4.6701 | 0.3857 |
| VHYETALAESEKK                           | 1505.7             | 2            | 2.9739 | 0.275  |
| VHYLEQQNKEIEAEIQALR                     | 2312.6             | 3            | 4.9032 | 0.2402 |
| VIAAEGEMNASR                            | 1248.4             | 2            | 4.2837 | 0.4607 |
| VIAATNRVDILDPELLR                       | 1851.2             | 3            | 5.6807 | 0.3442 |
| VIACDGGGGALGHPK                         | 1352.5             | 2            | 2.9675 | 0.1773 |
| VIADNVK                                 | 758.9              | 1            | 1.741  | 0.118  |
| VIADNVKDWSK                             | 1275.4             | 2            | 3.7273 | 0.3527 |
| VIAEGDLGIVEK                            | 1243.4             | 2            | 3.9414 | 0.373  |
| VIAEKDKQIK                              | 1172.4             | 2            | 2.6825 | 0.1768 |
| VIAGFSLNLLFK                            | 1435.8             | 2            | 2.6444 | 0.1127 |
| VIAHGKDHPTAATK                          | 1446.6             | 2            | 4.1457 | 0.4212 |
| VIAHPSFHNINFK                           | 1524.8             | 2            | 2.9618 | 0.2967 |
| VIAHSEYQK                               | 1075.2             | 2            | 2.7982 | 0.2725 |
| VIAHTQMR                                | 956.1              | 2            | 2.5424 | 0.24   |
| VIAINVDDPDAANYNDINDVK                   | 2289.4             | 2            | 5.7084 | 0.4579 |
| VIAINVDDPDAANYNDINDVKR                  | 2445.6             | 2            | 5.291  | 0.4571 |
| VIALGLPVPR                              | 1035.3             | 2            | 2.7585 | 0.1423 |
| VIATDINESKLQELEKYPGIQTR                 | 2647.0             | 3            | 6.3076 | 0.4879 |
| VIDDTNITR                               | 1047.1             | 2            | 3.235  | 0.2883 |
| VIDGLETLDLELEKLPVNEK                    | 2155.4             | 3            | 3.5312 | 0.2823 |
| VIDLPGGGAAFVMEHLK                       | 1755.1             | 2            | 3.239  | 0.2844 |
| VIDPATATSVDLR                           | 1358.5             | 3            | 3.2183 | 0.3106 |
| VIDPATATSVDLRDIK                        | 1714.9             | 2            | 3.5087 | 0.2956 |
| VIDQEMQAIGGQK                           | 1417.6             | 2            | 3.0189 | 0.1705 |
| VIDRELYQQLQR                            | 1561.8             | 2            | 4.4061 | 0.1364 |

| Peptide Sequence                    | Peptide mass (m/z) | Charge State | Xcorr  | DelCn2 |
|-------------------------------------|--------------------|--------------|--------|--------|
| VIDVFAMPQSGTGVSVEAVDPVFQAK          | 2693.1             | 3            | 3.8096 | 0.2643 |
| VIEASFPAGVDSSPR                     | 1532.7             | 2            | 2.9471 | 0.2496 |
| VIENEYAR                            | 1210.3             | 2            | 3.007  | 0.3375 |
| VIEEQLEPAVEK                        | 1384.6             | 2            | 2.85   | 0.1077 |
| VIELVDKEDVHISTSQVAEIVATLEKEEK       | 3253.6             | 3            | 5.3955 | 0.4534 |
| VIELVDKEDVHISTSQVAEIVATLEKEEKVEEKEK | 3996.5             | 3            | 5.6797 | 0.5079 |
| VIEPKDIHAK                          | 1150.4             | 2            | 2.466  | 0.1182 |
| VIEPLKDFHKDEVK                      | 1726.0             | 3            | 3.8431 | 0.3336 |
| VIEPQYFGLAYLFR                      | 1717.0             | 2            | 3.1573 | 0.3897 |
| VIESGPDQLNDNEYTK                    | 1822.9             | 2            | 4.8901 | 0.4593 |
| VIESTQDLGNDLAGVMALQR                | 2131.4             | 3            | 5.2597 | 0.3458 |
| VIEVGNNIDDDVNIIVFR                  | 2045.3             | 2            | 4.942  | 0.3925 |
| VIFFLPWQK                           | 1178.4             | 2            | 2.8278 | 0.2239 |
| VIFGLFGK                            | 881.1              | 2            | 2.6438 | 0.1138 |
| VIFLEDDVAAVVDGR                     | 1733.9             | 2            | 4.6648 | 0.4516 |
| VIFPAAEDKDQDLITIGKEDAVR             | 2658.0             | 3            | 5.96   | 0.4135 |
| VIFSGSLDFFSDSFFNSAVQK               | 2343.6             | 2            | 5.2934 | 0.4504 |
| VIGANKNQEEEEK                       | 1359.5             | 2            | 3.2332 | 0.1015 |
| VIGEDGQSVYK                         | 1195.3             | 2            | 3.2011 | 0.3079 |
| VIGEPTSLMDVFPTVVR                   | 1861.2             | 2            | 4.2715 | 0.3483 |
| VIGDDLSTLTGK                        | 1276.4             | 2            | 3.8743 | 0.4129 |
| VIGDDLSTLTGKNVLIVEDIIDTGKTMQTLLSLVR | 3830.4             | 3            | 5.4109 | 0.3735 |
| VIGIDHIK                            | 895.1              | 2            | 2.9398 | 0.1498 |
| VIGIDHIKELVDDSVNNVR                 | 2136.4             | 3            | 4.5613 | 0.4064 |
| VIGIDHIKELVDDSVNNVRKDDPTLLSSGR      | 3306.7             | 3            | 4.7117 | 0.3265 |
| VIGLSSDLQQVGGASAR                   | 1658.8             | 2            | 5.4345 | 0.4497 |
| VIGMHYFSPVDK                        | 1393.6             | 2            | 2.8595 | 0.3073 |
| VIGMHYFSPVDKMQLLEIITTEK             | 2694.2             | 3            | 5.8803 | 0.3351 |
| VIGNQSLVNELAFTAR                    | 1733.0             | 3            | 4.9161 | 0.1095 |
| VIGPFYEIVEDKK                       | 1537.8             | 2            | 2.604  | 0.1171 |
| VIGQDSSEIHFK                        | 1360.5             | 2            | 2.8891 | 0.2865 |
| VIGSGCNLDSAR                        | 1192.3             | 2            | 2.8269 | 0.2564 |
| VIGTLEEVHMPQNGINHPGITALAQAFVNPLLR   | 3623.2             | 3            | 6.3422 | 0.4889 |
| VIHDHFGIVEGLMTTVHAITATQK            | 2620.0             | 3            | 4.9773 | 0.3495 |
| VIHDNFGIVEGLMTTVHAITATQK            | 2597.0             | 3            | 8.2468 | 0.5751 |
| VIHDNFGIVEGLMTTVHAITATQKTVDGSPGK    | 3338.8             | 3            | 4.7555 | 0.4559 |

| Peptide Sequence                             | Peptide mass (m/z) | Charge State | Xcorr  | DelCn2 |
|----------------------------------------------|--------------------|--------------|--------|--------|
| VIHDNFGIVEGLMTTVHAITATQKTVDGSPGKLR           | 3794.3             | 3            | 6.2975 | 0.5077 |
| VIHGVINSFVHVEQYK                             | 1870.1             | 2            | 4.046  | 0.4164 |
| VIHLFDEKGNLGNMHR                             | 1996.2             | 3            | 3.4682 | 0.2829 |
| VIHLSNLPHSGYSDSAVLK                          | 2038.3             | 2            | 4.8975 | 0.3875 |
| VIHLSNLPHSGYSDSAVLKLAEPYK                    | 2797.2             | 3            | 3.8695 | 0.2693 |
| VIHSILNSPYAK                                 | 1342.6             | 2            | 3.3661 | 0.3105 |
| VIHVVTSEMDNYEPGVYTEK                         | 2311.6             | 2            | 6.1893 | 0.5547 |
| VIIKYYTR                                     | 1185.4             | 2            | 3.1349 | 0.1655 |
| VIIIGDSGVGK                                  | 1058.3             | 1            | 2.8942 | 0.3414 |
| VIIIGDSGVGKTSLMNQYVNK                        | 2237.6             | 2            | 2.8158 | 0.1221 |
| VIIITAAAQGIGQAAALAFAR                        | 2027.4             | 3            | 4.7936 | 0.3747 |
| VIISAPSADAPMFVMGVNHEK                        | 2214.6             | 2            | 4.7213 | 0.4083 |
| VIISAPSADAPMFVMGVNHEKYDNSLK                  | 2935.4             | 2            | 4.1915 | 0.4977 |
| VIISAPSADAPMFVMGVNHEKYDNSLKIISNASCTTNCLAPLAK | 4637.4             | 3            | 4.0083 | 0.2998 |
| VIIIVKDGPGFYTTR                              | 1666.0             | 2            | 3.8417 | 0.2921 |
| VIKDFMIQGGDFTR                               | 1627.9             | 2            | 4.4808 | 0.4581 |
| VIKDFMIQGGDFTRGDGTGGK                        | 2200.5             | 2            | 4.9653 | 0.4392 |
| VIKEYPGKEVK                                  | 1290.5             | 2            | 2.9087 | 0.1888 |
| VILAEFDYKAEPLETFPFDQSK                       | 2588.9             | 3            | 3.554  | 0.2276 |
| VILAEFDYKAEPLETFPFDQSKER                     | 2874.2             | 3            | 4.8442 | 0.3245 |
| VILDLTPNYR                                   | 1204.4             | 2            | 3.113  | 0.2753 |
| VILDLTPNYRGENSWFSTQVDTVATK                   | 2956.3             | 3            | 6.2982 | 0.5009 |
| VILDNEEQRELQKLEEGEVNVLNLAATDQLVQQR           | 4122.5             | 3            | 4.8198 | 0.3799 |
| VILGNELPKFYDE                                | 1537.7             | 2            | 3.1225 | 0.2973 |
| VILGSEAAQQHPPEVR                             | 1763.9             | 2            | 5.2671 | 0.4759 |
| VILHLKEDQTEYLEER                             | 2016.2             | 3            | 5.3424 | 0.4858 |
| VILHLKEDQTEYLEERR                            | 2172.4             | 3            | 4.4394 | 0.2657 |
| VILHPTPNSPK                                  | 1203.4             | 2            | 2.5104 | 0.1585 |
| VILPVSVDEYQVGQLYSVAEASK                      | 2495.8             | 3            | 4.1579 | 0.3587 |
| VILQDFTGVPVAVVDFAAAMR                        | 2050.4             | 2            | 5.3642 | 0.5633 |
| VILQDFTGVPVAVVDFAAAMRDAVK                    | 2463.9             | 3            | 3.2623 | 0.1307 |
| VIMVGSGGVGK                                  | 1004.2             | 2            | 2.5824 | 0.2314 |
| VIMVTGDHPITAK                                | 1382.7             | 2            | 3.8828 | 0.3896 |
| VINAHSFYNGTTTTLPISDEDRTPR                    | 2777.0             | 3            | 3.855  | 0.3483 |
| VINAENAAHKSEK                                | 1411.5             | 2            | 3.7025 | 0.3773 |
| VINDKHDDVMAK                                 | 1385.6             | 2            | 3.8563 | 0.3509 |



| Peptide Sequence                          | Peptide mass (m/z) | Charge State | Xcorr  | DelCn2 |
|-------------------------------------------|--------------------|--------------|--------|--------|
| VINDPIHGHIELHPLLVR                        | 2073.4             | 3            | 6.1018 | 0.465  |
| VINEPTAAALAYGLDK                          | 1646.9             | 2            | 5.0335 | 0.4676 |
| VINEPTAAALAYGLDKSEDKVIAVYDLGGGTFDISILEIQK | 4339.9             | 3            | 5.3778 | 0.437  |
| VINQILTEMDGMSTK                           | 1681.0             | 2            | 5.2361 | 0.4979 |
| VINQILTEMDGMSTKK                          | 1809.1             | 2            | 2.8747 | 0.2161 |
| VINSVDIK                                  | 888.0              | 2            | 3.3301 | 0.2007 |
| VINYEEFKK                                 | 1170.3             | 2            | 2.685  | 0.1846 |
| VINYEEFKKALEELATKR                        | 2182.5             | 3            | 3.307  | 0.2096 |
| VIPEDGPAAQNPENVKR                         | 1835.0             | 2            | 3.2475 | 0.4569 |
| VIPELDGKLTGMAFR                           | 1648.0             | 2            | 2.8911 | 0.2471 |
| VIPELNGKLTGMAFR                           | 1647.0             | 2            | 2.8876 | 0.4405 |
| VIPSPFKHADIVTTTTTHK                       | 1993.3             | 2            | 3.1981 | 0.3659 |
| VIPSQEHLNGPLPVPFTNGEIQKENS                | 3002.3             | 3            | 3.9757 | 0.369  |
| VIQALAMKGDVENIEVVQK                       | 2085.5             | 3            | 4.7967 | 0.2224 |
| VIQAQTAFSANPANPAILSEASAPIPHDGNLYPR        | 3532.9             | 3            | 5.6355 | 0.3729 |
| VIQEGRGELPDFQDGTK                         | 1890.0             | 2            | 4.0817 | 0.354  |
| VIQEGRGELPDFQDGTKATFHYP                   | 2665.9             | 3            | 4.3865 | 0.1724 |
| VIQEIVDKSGVVR                             | 1442.7             | 2            | 3.9375 | 0.281  |
| VIQGDGVDINTLQEIVEGMK                      | 2159.4             | 2            | 5.9555 | 0.5031 |
| VIQGDGVDINTLQEIVEGMKQK                    | 2415.7             | 2            | 4.1217 | 0.2952 |
| VIQHNALEDR                                | 1195.3             | 2            | 2.9349 | 0.303  |
| VIQKVEAFEHR                               | 1356.6             | 3            | 3.9    | 0.3334 |
| VIQPHGGGSPLEGTQHLQDVPYVMVR                | 2930.3             | 3            | 4.353  | 0.3198 |
| VIQQLEGAFALVFK                            | 1563.9             | 2            | 4.7916 | 0.3871 |
| VIQQSLEQEEAEHKATK                         | 1969.1             | 2            | 4.0271 | 0.2554 |
| VIQTHPHANKLPLKDSFTYEDYR                   | 2774.1             | 3            | 4.0514 | 0.3189 |
| VIQVAAGSSNLKR                             | 1343.6             | 2            | 3.7141 | 0.2006 |
| VIQYFAIVAALGDGPGKK                        | 1848.2             | 2            | 2.5107 | 0.1877 |
| VIQYLAHVASSHK                             | 1453.7             | 2            | 4.3791 | 0.4576 |
| VIQYLAHVASSPK                             | 1413.6             | 2            | 4.235  | 0.4382 |
| VIQYLAYVASSHK                             | 1479.7             | 2            | 4.4786 | 0.4905 |
| VIRGWDEALLTMSKGEK                         | 1934.2             | 3            | 3.8749 | 0.3569 |
| VIRPLDQPSSFDPATPYIK                       | 2048.3             | 3            | 4.0298 | 0.3836 |
| VISDGEQGGQQGHR                            | 1468.5             | 2            | 3.3279 | 0.3527 |
| VISELNGKNIEDVIAQGIGK                      | 2098.4             | 2            | 5.5222 | 0.4383 |
| VISGVLQLGNIVFK                            | 1487.8             | 2            | 5.2343 | 0.4485 |

| Peptide Sequence                   | Peptide mass (m/z) | Charge State | Xcorr  | DelCn2 |
|------------------------------------|--------------------|--------------|--------|--------|
| VISGVLQLGNIVFKK                    | 1616.0             | 2            | 3.9751 | 0.3534 |
| VISHMLSSHGGEIFLHVLSSSR             | 2394.7             | 2            | 2.7509 | 0.2456 |
| VISKHDLGHFMLR                      | 1553.9             | 2            | 3.4084 | 0.3314 |
| VISSIEQKTDTSKD                     | 1551.7             | 2            | 4.3336 | 0.4171 |
| VISSIEQKTDTSDDK                    | 1679.9             | 2            | 3.7239 | 0.3463 |
| VISSIEQKTER                        | 1290.4             | 2            | 3.0523 | 0.314  |
| VISSIEQKTERNEK                     | 1661.8             | 2            | 4.0601 | 0.2315 |
| VISSIEQKTSADGNEK                   | 1706.8             | 2            | 4.7219 | 0.4165 |
| VISTMSVGIDHLALDEIK                 | 1942.3             | 2            | 3.594  | 0.3429 |
| VISTMSVGIDHLALDEIKKR               | 2226.6             | 2            | 4.5019 | 0.4045 |
| VISTTDAER                          | 992.1              | 2            | 2.8494 | 0.1338 |
| VISTTDAERQAVTPPGLQEAINDLVKK        | 2895.3             | 3            | 3.8493 | 0.2054 |
| VITEEEKNFK                         | 1237.4             | 2            | 3.4617 | 0.3211 |
| VITEEEKNFKAFASLR                   | 1883.1             | 2            | 5.0723 | 0.4926 |
| VITEYLNQESAK                       | 1466.6             | 2            | 4.8907 | 0.3868 |
| VITFHKKEPFELEAFYTNLHEVPYPDAR       | 3392.8             | 3            | 3.9475 | 0.1743 |
| VITIMQNPR                          | 1072.3             | 2            | 2.5596 | 0.1902 |
| VITNQYNNPAGLYSSENISNFNNALESK       | 3103.3             | 3            | 5.7366 | 0.4997 |
| VIVDFSSPNIK                        | 1290.5             | 2            | 3.893  | 0.2888 |
| VIVQQPGER                          | 1026.2             | 2            | 2.6525 | 0.2264 |
| VIVVGNPANTNCLTASK                  | 1702.0             | 2            | 3.9701 | 0.3512 |
| VIVVVVGTNNHENTAEVAGGIEAIVQLINTR    | 3447.8             | 3            | 4.1954 | 0.2112 |
| VIYVLPMLTIKEDKGTGVVTSVPSDSPDDIAALR | 3602.2             | 3            | 5.2895 | 0.3014 |
| VKADQDSEAMKR                       | 1378.5             | 2            | 3.7496 | 0.3628 |
| VKADRDESSPYAAMLAAQDVAQR            | 2493.7             | 3            | 5.1383 | 0.3515 |
| VKAEDTVTVENVLK                     | 1545.8             | 2            | 3.9838 | 0.287  |
| VKAEEDKIPLLVVGK                    | 1753.1             | 2            | 4.2311 | 0.456  |
| VKAEEDKIPLLVVGKSDLEER              | 2482.8             | 3            | 5.5231 | 0.448  |
| VKAEGPGLSK                         | 986.1              | 2            | 2.6366 | 0.1146 |
| VKAEPKIEAFR                        | 1359.6             | 2            | 3.2814 | 0.3993 |
| VKAEVQNLGGELVVGVSAMSLIQAQK         | 2815.2             | 3            | 3.6906 | 0.2717 |
| VKAHGPGLEGGLVGKPAEFTIDTK           | 2422.8             | 3            | 4.0633 | 0.3216 |
| VKALDEEVHK                         | 1168.3             | 2            | 2.839  | 0.1397 |
| VKALESALKEAK                       | 1287.5             | 2            | 2.9572 | 0.2183 |
| VKANSVKQEFEK                       | 1407.6             | 2            | 3.393  | 0.3039 |
| VKANSVKQEFEKQDELKR                 | 2177.4             | 3            | 4.3008 | 0.3161 |

| Peptide Sequence                        | Peptide mass (m/z) | Charge State | Xcorr  | DelCn2 |
|-----------------------------------------|--------------------|--------------|--------|--------|
| VKAQTAPNKDVQR                           | 1455.6             | 2            | 3.5814 | 0.3357 |
| VKATAAPAGAPPQPQDLEFTKLPNGLVIASLENYSPVSR | 4049.6             | 3            | 5.0449 | 0.3473 |
| VKDALEFWLQAGVDGFQVR                     | 2179.5             | 3            | 5.3284 | 0.446  |
| VKDASPNQVAEK                            | 1286.4             | 2            | 3.439  | 0.313  |
| VKDAVQAVKR                              | 1114.3             | 2            | 3.1596 | 0.2211 |
| VKDDIESLHDK                             | 1299.4             | 2            | 3.8287 | 0.2769 |
| VKDDIESLHDKFK                           | 1574.8             | 2            | 4.4871 | 0.3498 |
| VKDDMTEVTGR                             | 1251.4             | 2            | 3.0578 | 0.248  |
| VKDEFSVDKEASAHISGDK                     | 2063.2             | 2            | 4.4406 | 0.4199 |
| VKDILQNVFKLEK                           | 1574.9             | 2            | 3.4997 | 0.1097 |
| VKDLES LFHR                             | 1244.4             | 3            | 4.2587 | 0.3198 |
| VKDLES LFHRSEVELAAALSDKR                | 2614.9             | 3            | 4.3963 | 0.3668 |
| VKDLVLSVHNR                             | 1280.5             | 2            | 2.6125 | 0.2048 |
| VKDPNSGLPK                              | 1055.2             | 2            | 2.5015 | 0.1002 |
| VKDRDDFPVVLVGNK                         | 1701.9             | 2            | 3.5144 | 0.1523 |
| VKDS EDVPMVLVGNK                        | 1630.9             | 2            | 3.138  | 0.3455 |
| VKDTDDVPMILVGNK                         | 1644.9             | 2            | 4.7205 | 0.3701 |
| VKDTFNGNLPFLFK                          | 1640.9             | 3            | 3.7763 | 0.3836 |
| VKEALAGLLVTYPNSQEAENWKK                 | 2589.9             | 3            | 3.961  | 0.1718 |
| VKEDENVPFLLVGNK                         | 1701.9             | 2            | 4.5788 | 0.3304 |
| VKEDENVPFLLVGNKSDLEDKR                  | 2545.8             | 3            | 4.4562 | 0.3008 |
| VKEDKFENPDLFAK                          | 1680.9             | 2            | 3.7017 | 0.3559 |
| VKEDPDGEHAR                             | 1253.3             | 2            | 3.3769 | 0.2388 |
| VKEDPDGEHARR                            | 1409.5             | 2            | 2.8951 | 0.195  |
| VKEDSDEQIKQLEDALKDVQKR                  | 2615.9             | 3            | 3.7477 | 0.2146 |
| VKEEEAALAAK                             | 1159.3             | 2            | 3.2792 | 0.2678 |
| VKEEEIHSANK                             | 1284.4             | 2            | 2.685  | 0.1444 |
| VKEEEVHR                                | 1026.1             | 2            | 2.6305 | 0.1486 |
| VKEEIIIEAFVQELR                         | 1704.0             | 2            | 4.5825 | 0.4011 |
| VKEESSSISLKDLEFTQR                      | 2071.2             | 3            | 4.5002 | 0.4423 |
| VKEFLHNQGK                              | 1200.4             | 2            | 3.3133 | 0.2597 |
| VKEGMNIVEAMER                           | 1506.8             | 2            | 4.844  | 0.442  |
| VKEHINSVSAMK                            | 1343.6             | 2            | 2.9947 | 0.2619 |
| VKEIGSTMSGR                             | 1165.3             | 2            | 2.9214 | 0.228  |
| VKEIVAQHTK                              | 1153.4             | 2            | 2.8441 | 0.1801 |
| VKEKEAELKEAEK                           | 1531.7             | 2            | 4.3386 | 0.274  |

| Peptide Sequence             | Peptide mass (m/z) | Charge State | Xcorr  | DelCn2 |
|------------------------------|--------------------|--------------|--------|--------|
| VKEKEAELKEAEKELHEK           | 2168.4             | 3            | 3.9471 | 0.2328 |
| VKELEDLEHLQLDFWR             | 2071.3             | 2            | 6.1265 | 0.5048 |
| VKELEEEELQHLK                | 1495.7             | 2            | 2.4588 | 0.1753 |
| VKELEEQLENETHLKEIHNK         | 2574.9             | 2            | 5.2865 | 0.3481 |
| VKELGHSTQQFR                 | 1430.6             | 2            | 3.1832 | 0.289  |
| VKELLVDCYKPTAFISGLLDK        | 2482.9             | 3            | 5.3255 | 0.4148 |
| VKENFDKAR                    | 1107.2             | 2            | 2.9157 | 0.1423 |
| VKEPSVQEATSTSDILK            | 1833.0             | 2            | 2.4471 | 0.1001 |
| VKEPSVQEATSTSDILKVPKPEPIPEPK | 3045.5             | 3            | 3.7874 | 0.1389 |
| VKEQLEAAKPEPVIEEVDLANLAPR    | 2760.1             | 3            | 5.3607 | 0.3496 |
| VKESDKLVATSK                 | 1305.5             | 2            | 3.6301 | 0.2662 |
| VKETQEDKLEGGAAK              | 1603.8             | 2            | 3.7284 | 0.2621 |
| VKETQEDKLEGGAAKR             | 1759.9             | 3            | 3.2783 | 0.1417 |
| VKEVLPHVPLGVIQR              | 1685.1             | 3            | 3.3359 | 0.3421 |
| VKEYQVETIVDTLCTNMLSDKEQLR    | 2957.4             | 3            | 4.634  | 0.4279 |
| VKFIHDQTSNPVK                | 1511.7             | 2            | 4.3523 | 0.2969 |
| VKGDVDVSLPK                  | 1157.3             | 2            | 3.3129 | 0.222  |
| VKGDVDVSPK                   | 1143.3             | 2            | 2.5191 | 0.1848 |
| VKGDVDVTLPK                  | 1171.4             | 2            | 2.5706 | 0.1899 |
| VKGEEIYSMDEGIR               | 1626.8             | 2            | 2.7976 | 0.3117 |
| VKGGGHVAQIYAIR               | 1469.7             | 2            | 4.2855 | 0.4691 |
| VKGGNIDVHPSEK                | 1380.5             | 2            | 3.1661 | 0.212  |
| VKGHFGPINSVAFHPDGK           | 1908.2             | 2            | 3.4873 | 0.3026 |
| VKGLVLGPIHK                  | 1161.5             | 2            | 2.9186 | 0.2886 |
| VKGPVRMPTK                   | 1113.4             | 2            | 2.4317 | 0.298  |
| VKGTNIQENEYVK                | 1522.7             | 2            | 3.8348 | 0.391  |
| VKHEVSGETVVFQGGALGK          | 1943.2             | 3            | 4.8694 | 0.3678 |
| VKIGHYILGDTLGVGTFGK          | 1976.3             | 2            | 4.8286 | 0.4278 |
| VKIHEATGMPAGK                | 1339.6             | 2            | 3.419  | 0.333  |
| VKIHPNTVMVK                  | 1266.6             | 2            | 2.7172 | 0.1738 |
| VKIPEELKPWLVDWDLITR          | 2466.9             | 3            | 3.7224 | 0.1989 |
| VKIPEGTILTMMLTVK             | 1890.3             | 3            | 5.4458 | 0.3696 |
| VKISTEVGITNVDLSTVDKQSIAPK    | 2759.1             | 3            | 6.0714 | 0.3824 |
| VKKDDEEEDPLDQLISR            | 2030.2             | 2            | 4.7915 | 0.326  |
| VKKEDEVQAIATLIEK             | 1815.1             | 2            | 4.1047 | 0.2724 |
| VKKYEQGFITDPVVLSPK           | 2049.4             | 3            | 3.7906 | 0.1344 |

| Peptide Sequence                      | Peptide mass (m/z) | Charge State | Xcorr  | DelCn2 |
|---------------------------------------|--------------------|--------------|--------|--------|
| VKLAADEDDEDDDEDDDEDDDDDFDDEEAEEKAPVKK | 4476.2             | 3            | 7.0789 | 0.4621 |
| VKLAAVDATVNQVLASR                     | 1756.0             | 2            | 5.9152 | 0.5202 |
| VKLADIQIEQLNR                         | 1540.8             | 3            | 4.1089 | 0.2204 |
| VKLDDLLAYLPSDDSSLPKDVSPQTQAK          | 2917.3             | 3            | 4.9212 | 0.3511 |
| VKLDSPAGTALSPSGHTK                    | 1767.0             | 2            | 3.923  | 0.2759 |
| VKLEAEIATYR                           | 1293.5             | 2            | 3.7534 | 0.2769 |
| VKLEAEIATYRR                          | 1449.7             | 2            | 2.4324 | 0.1651 |
| VKLEEQLKETVEK                         | 1573.8             | 2            | 4.7521 | 0.3109 |
| VKLEGHELPADLPPHLVPPSKR                | 2430.8             | 3            | 3.8512 | 0.2934 |
| VKLFTESTGVLALDKELGR                   | 2206.5             | 2            | 3.8879 | 0.3481 |
| VKLGHTDILVGVK                         | 1379.7             | 2            | 2.8122 | 0.2285 |
| VKLPDGHELTFP NR                       | 1623.8             | 2            | 3.1673 | 0.3406 |
| VKLQEMEGTVK                           | 1262.5             | 2            | 4.0366 | 0.1649 |
| VKLTAE LIEQAAQYTN AVR                 | 2119.4             | 3            | 5.0472 | 0.4304 |
| VKLTNAEGVEFK                          | 1335.5             | 2            | 3.1404 | 0.3258 |
| VKNELFKR                              | 1034.2             | 2            | 2.4029 | 0.1779 |
| VKNFGIWL R                            | 1133.4             | 2            | 2.515  | 0.1564 |
| VKNPEDLSAETMAK                        | 1533.7             | 2            | 3.8792 | 0.2928 |
| VKNQLKETTEAACR                        | 1591.8             | 2            | 4.1813 | 0.2589 |
| VKNSLLSLSDT                           | 1177.3             | 2            | 2.5021 | 0.1827 |
| VKNSQSFFSGLFGGSSK                     | 1778.0             | 2            | 3.1623 | 0.2395 |
| VKPAPDETSFSEALLK                      | 1733.0             | 2            | 3.821  | 0.3342 |
| VKPAPDETSFSEALLKR                     | 1889.1             | 2            | 4.8818 | 0.469  |
| VKPEEMMDERPK                          | 1489.7             | 2            | 3.3109 | 0.1831 |
| VKPFMTGAAEQIK                         | 1420.7             | 2            | 2.9264 | 0.1963 |
| VKPFVVRDAVVYPILVEFTR                  | 2348.8             | 3            | 3.5163 | 0.1595 |
| VKPLLQVSR                             | 1040.3             | 2            | 2.4129 | 0.3303 |
| VKPTLIAVRPPVPLPAPSH PASTNEPIVLED      | 3256.8             | 3            | 5.3554 | 0.4878 |
| VKQDSESPK                             | 1018.1             | 2            | 2.4335 | 0.117  |
| VKQELLEEVKK                           | 1343.6             | 2            | 4.0076 | 0.1741 |
| VKQELLEEVKKELQK                       | 1842.2             | 3            | 4.5912 | 0.2535 |
| VKQLPLVKPYLR                          | 1454.8             | 3            | 3.6063 | 0.2425 |
| VKQQFMTTQDASK                         | 1512.7             | 2            | 4.1445 | 0.3466 |
| VKQQFMTTQDASKDGR                      | 1841.0             | 2            | 4.655  | 0.4853 |
| VKSPQLQAEAK                           | 1200.4             | 2            | 2.8385 | 0.187  |
| VKSVLVDFLIGSGLK                       | 1575.9             | 2            | 4.1555 | 0.4512 |

| Peptide Sequence                     | Peptide mass (m/z) | Charge State | Xcorr  | DelCn2 |
|--------------------------------------|--------------------|--------------|--------|--------|
| VKTDDIAR                             | 918.0              | 2            | 2.7583 | 0.1929 |
| VKTDRPLPENPYHSR                      | 1810.0             | 3            | 4.0799 | 0.3066 |
| VKTEIEEELKSLDKEISEAFTSTGFDR          | 3103.4             | 3            | 5.0061 | 0.3375 |
| VKTLAMDTILANAR                       | 1517.8             | 2            | 4.011  | 0.317  |
| VKTLTGKEIEIDIEPTDKVER                | 2414.7             | 3            | 6.0373 | 0.3046 |
| VKTPSFGISAPQVSIPDVNVNLKGPK           | 2694.1             | 3            | 3.8829 | 0.3046 |
| VKTSEDADELHK                         | 1372.5             | 2            | 3.388  | 0.2688 |
| VKTSEEQAEAK                          | 1220.3             | 2            | 2.9735 | 0.1544 |
| VKTSTVDLPIENQLLWQIDR                 | 2369.7             | 3            | 3.7841 | 0.275  |
| VKTSTVDLPIENQLLWQIDREMLNLYIENEGK     | 3804.3             | 3            | 6.6165 | 0.5145 |
| VKTTGIVETHFTFK                       | 1608.9             | 2            | 2.7425 | 0.1586 |
| VKTYTDELTPIESAVSVFK                  | 2128.4             | 2            | 5.4292 | 0.4653 |
| VKVDESHK                             | 942.1              | 2            | 2.8609 | 0.1412 |
| VKVDNQHDFQDIASVVALTK                 | 2228.5             | 3            | 4.737  | 0.4147 |
| VKVDPSHDASK                          | 1183.3             | 2            | 3.2079 | 0.3021 |
| VKVDPSHDASKVKAEGPGLSK                | 2150.4             | 3            | 3.5166 | 0.2472 |
| VKVEHVVSVLEK                         | 1366.6             | 2            | 3.835  | 0.3599 |
| VKVEPAVDTSR                          | 1201.4             | 2            | 2.8523 | 0.2625 |
| VKVEPSHDASK                          | 1197.3             | 2            | 3.0837 | 0.2114 |
| VKVFPGGVER                           | 1088.3             | 2            | 3.0385 | 0.1661 |
| VKVGKEDSSSAEFLEK                     | 1753.9             | 2            | 4.9559 | 0.4427 |
| VKVGKEDSSSTEFVEK                     | 1769.9             | 2            | 4.5429 | 0.3285 |
| VKVGVDGFGR                           | 1034.2             | 2            | 3.1243 | 0.2865 |
| VKVKDEPQR                            | 1099.3             | 2            | 3.0439 | 0.1445 |
| VKVLPTHDASK                          | 1195.4             | 2            | 3.0648 | 0.2184 |
| VKVNKDDIQK                           | 1187.4             | 2            | 3.0121 | 0.1341 |
| VKVSQAAADLLAYCEAHVR                  | 2045.4             | 3            | 4.7283 | 0.3337 |
| VKVSQAAADLLAYCEAHVREDPLIIPVPASENPFRR | 3821.4             | 3            | 3.233  | 0.1384 |
| VKVWGNVGTVEWADPIEDPDPEVMAK           | 2883.2             | 3            | 5.0107 | 0.2091 |
| VKVWGNVVTVEWADPVEEPDPEVMAK           | 2925.3             | 3            | 3.536  | 0.1375 |
| VKWGDIEFPPPFGR                       | 1645.9             | 2            | 3.1425 | 0.2924 |
| VKYEETVFYGLQYILNK                    | 2108.4             | 2            | 4.0054 | 0.3947 |
| VKYETELAMR                           | 1240.5             | 1            | 3.5366 | 0.2679 |
| VLAALQERLDNVPHTPSSYIETLPK            | 2793.2             | 3            | 4.4985 | 0.4045 |
| VLAAVYK                              | 763.9              | 1            | 1.9562 | 0.1579 |
| VLADPSDDTK                           | 1061.1             | 2            | 2.9474 | 0.2731 |

| Peptide Sequence              | Peptide mass (m/z) | Charge State | Xcorr  | DelCn2 |
|-------------------------------|--------------------|--------------|--------|--------|
| VLADPSDDTKGFFDPNTHENLTYLQLLER | 3350.6             | 3            | 3.6778 | 0.1074 |
| VLADPSDDTKGFFDPNTHENLTYR      | 2753.9             | 3            | 3.3301 | 0.2147 |
| VLADTKELVSSK                  | 1290.5             | 2            | 3.8757 | 0.432  |
| VLAEKLA AIGEATR               | 1442.7             | 2            | 3.5472 | 0.3609 |
| VLAFGAKPDSTLHTYFPSFLSR        | 2455.8             | 3            | 3.8012 | 0.258  |
| VLAFTAVGDGPPSPTIQVK           | 1898.2             | 2            | 4.7931 | 0.3286 |
| VLGDKNFITAEELR                | 1676.9             | 2            | 4.6649 | 0.4779 |
| VLGDKNFITAEELRR               | 1833.1             | 2            | 2.9507 | 0.1189 |
| VLGETLSVNDPPDVLDR             | 1911.1             | 2            | 5.5446 | 0.4513 |
| VLGQTLDINMAGEPKPDRPK          | 2251.6             | 3            | 4.4746 | 0.3364 |
| VLAHLAPLFDNPKLDKELR           | 2190.6             | 2            | 3.488  | 0.3519 |
| VLAIAQNFV                     | 975.2              | 2            | 2.431  | 0.1522 |
| VLAKPQNTAEVQK                 | 1426.6             | 2            | 3.9932 | 0.3518 |
| VLALELFEQITK                  | 1404.7             | 2            | 4.0629 | 0.4212 |
| VLALGYKELGHLTHQQAR            | 2035.3             | 3            | 5.4364 | 0.4965 |
| VLALPEPSPAAPTLRSELELTLGKLEQVR | 3129.6             | 3            | 4.1429 | 0.4358 |
| VLALSFDAPGR                   | 1146.3             | 2            | 3.3334 | 0.3599 |
| VLALSVETDYTFPLAEK             | 1897.2             | 2            | 5.7504 | 0.4952 |
| VLALSVETDYTFPLAEKVK           | 2124.5             | 2            | 5.0345 | 0.4269 |
| VLAMSGDPNYLHR                 | 1473.7             | 2            | 4.0467 | 0.3028 |
| VLANNLSFEK                    | 1222.4             | 2            | 3.5897 | 0.3001 |
| VLANPGNSQVAR                  | 1226.4             | 2            | 3.7889 | 0.3456 |
| VLAPASTLQSSYQIPTENSMTAR       | 2466.8             | 3            | 4.964  | 0.3797 |
| VLAQFGER                      | 920.0              | 2            | 2.4958 | 0.1848 |
| VLAQLLR                       | 813.0              | 1            | 1.7335 | 0.1168 |
| VLAQNSGFDLQETLVK              | 1763.0             | 3            | 4.248  | 0.3866 |
| VLAQQGEYSEAIPILR              | 1788.0             | 2            | 4.1211 | 0.3656 |
| VLASEKTSLSEK                  | 1292.5             | 2            | 2.8438 | 0.2923 |
| VLATAFDTTLGGR                 | 1322.5             | 2            | 4.3067 | 0.4029 |
| VLATQPGPGR                    | 996.1              | 2            | 3.1766 | 0.1074 |
| VLATVTKPVGGDK                 | 1285.5             | 2            | 3.2129 | 0.3369 |
| VLATVTKPVGGDKNGGTR            | 1771.0             | 2            | 4.005  | 0.421  |
| VLAVNQENEHLMEDYEK             | 2062.2             | 2            | 5.4409 | 0.4085 |
| VLAVNQENEHLMEDYEKLASDLLEWIR   | 3259.6             | 3            | 5.8061 | 0.4737 |
| VLAVNQENEHLMEDYEKLASDLLEWIRR  | 3415.8             | 3            | 4.0497 | 0.282  |
| VLAVNQENEQLMEDYEK             | 2053.2             | 2            | 5.3919 | 0.4055 |

| Peptide Sequence                        | Peptide mass (m/z) | Charge State | Xcorr  | DelCn2 |
|-----------------------------------------|--------------------|--------------|--------|--------|
| VLAVNQENEQLMEDYEKLASDLLEWIR             | 3250.6             | 3            | 5.0603 | 0.4184 |
| VLAVNQENEQLMEDYEKLASDLLEWIRR            | 3406.8             | 3            | 3.3557 | 0.1567 |
| VLAVTAIRENLISALEEAKK                    | 2169.6             | 3            | 5.1486 | 0.3455 |
| VLDAMPLPYLINYYGNPHSR                    | 2237.6             | 3            | 3.4294 | 0.3192 |
| VLDASGHHETLIGEEQRPVFK                   | 2363.6             | 3            | 3.2433 | 0.3139 |
| VLDASWYSPGTR                            | 1352.5             | 2            | 3.4353 | 0.3288 |
| VLDAVRGSPAINVAVHVFR                     | 2021.4             | 3            | 4.7311 | 0.3972 |
| VLDDGELLVQQTK                           | 1458.6             | 2            | 4.396  | 0.2026 |
| VLDELTLAR                               | 1030.2             | 2            | 3.8561 | 0.3336 |
| VLDELTLARTDLEMQIEGLKEELAYLK             | 3135.6             | 3            | 6.1043 | 0.3812 |
| VLDFEHFLPMLQTVAK                        | 1889.3             | 3            | 5.0831 | 0.4274 |
| VLDGLHNELQTIGFQIETIGK                   | 2326.6             | 3            | 5.722  | 0.4002 |
| VLDGLHNELQTIGFQIETIGKK                  | 2454.8             | 3            | 6.1981 | 0.4324 |
| VLDIIATINK                              | 1100.3             | 2            | 3.4982 | 0.2486 |
| VLDIIATINKGSIVWQEVFDDKAK                | 2704.1             | 3            | 5.4224 | 0.4547 |
| VLDKLLLYLR                              | 1246.6             | 2            | 3.538  | 0.2919 |
| VLDLDFR                                 | 991.2              | 2            | 3.2953 | 0.3128 |
| VLDLDFRVDKGGDPALIR                      | 2113.4             | 3            | 3.7328 | 0.2691 |
| VLDLGSPQLAMHSIR                         | 1637.9             | 2            | 3.3052 | 0.3945 |
| VLDLSGNALEALPPGQGLGPAEPPGLPQLQSLNLSG NR | 3792.3             | 3            | 3.6214 | 0.3963 |
| VLDNYLTSPLPEEVDETSAEDEGV SQ R           | 2994.1             | 3            | 5.2261 | 0.5181 |
| VLDNYLTSPLPEEVDETSAEDEGV SQ R K         | 3122.3             | 3            | 3.9543 | 0.1624 |
| VLDPFTIKPLDR                            | 1414.7             | 1            | 2.6902 | 0.192  |
| VLDPFTIKPLDRK                           | 1542.8             | 2            | 2.5022 | 0.231  |
| VLDQKEHR                                | 1025.1             | 2            | 2.5961 | 0.1713 |
| VLDQLSAGK                               | 931.1              | 2            | 2.4629 | 0.1131 |
| VLDQVETELQR                             | 1330.5             | 2            | 2.7055 | 0.2645 |
| VLDSGAPIKIPVGPETLGR                     | 1920.2             | 2            | 5.1959 | 0.4285 |
| VLDVNLMGTFNVIR                          | 1591.9             | 2            | 4.8238 | 0.3153 |
| VLDWGLQEQLWPHMEALRPR                    | 2475.9             | 3            | 3.4652 | 0.349  |
| VLEALELYNKL VNEAPVYSVYSK                | 2643.0             | 3            | 5.5978 | 0.3014 |
| VLEDNSALDK                              | 1104.2             | 2            | 2.5033 | 0.1611 |
| VLEDRPLSDKSGDSSQVTQVSPQR                | 2686.9             | 3            | 5.5176 | 0.4171 |
| VLEDSDLK                                | 919.0              | 1            | 2.54   | 0.1746 |
| VLEDSDLKK                               | 1047.2             | 2            | 2.9305 | 0.2008 |
| VLEDSDLKKSDIDEIVLVGGSTR                 | 2489.8             | 2            | 6.3937 | 0.3791 |



| Peptide Sequence                        | Peptide mass (m/z) | Charge State | Xcorr  | DelCn2 |
|-----------------------------------------|--------------------|--------------|--------|--------|
| VLEDSLKKSIDEIVLVGGSTRIPK                | 2828.2             | 3            | 5.2427 | 0.1894 |
| VLEEANQAINPK                            | 1326.5             | 2            | 3.1998 | 0.1686 |
| VLEEEKEAINQETVQQR                       | 2044.2             | 2            | 5.0348 | 0.3536 |
| VLEEGSVEAR                              | 1089.2             | 2            | 2.7616 | 0.2155 |
| VLEFKAHEGEIEDLALGPDGKLVTVGR             | 2894.3             | 3            | 3.7543 | 0.2656 |
| VLEGMEVVR                               | 1032.2             | 2            | 3.6359 | 0.3622 |
| VLEGMEVVRKVESTKTDSR                     | 2164.5             | 3            | 3.5555 | 0.1483 |
| VLEHQLLQTTK                             | 1310.5             | 2            | 3.8786 | 0.3333 |
| VLEKSPGK                                | 858.0              | 2            | 2.5365 | 0.1733 |
| VLELDNVKSEIIPMFSNLSDEQDSVR              | 3050.4             | 2            | 4.3348 | 0.3042 |
| VLELDPALAPVVSRR                         | 1479.7             | 2            | 4.2996 | 0.4085 |
| VLELEKTLEAER                            | 1430.6             | 2            | 3.0178 | 0.2526 |
| VLELIPQIANEQLTEELLIVNDNLNNVFLR          | 3479.0             | 3            | 3.9838 | 0.2646 |
| VLELKEHKLDGK                            | 1409.7             | 2            | 4.1714 | 0.2616 |
| VLELNKKQSEDTAK                          | 1732.9             | 2            | 4.2125 | 0.3344 |
| VLELPYQGEELSMVILLPDDIEDESTGLKK          | 3375.8             | 3            | 3.995  | 0.2591 |
| VLELPYQGEELSMVILLPDDIEDESTGLKKIEEQLTLEK | 4460.1             | 3            | 4.3831 | 0.2925 |
| VLELVSITANK                             | 1187.4             | 2            | 3.7571 | 0.3049 |
| VLENAEGAR                               | 959.0              | 2            | 3.2159 | 0.2158 |
| VLENLKNMIHETNEHTLPK                     | 2261.6             | 3            | 4.5599 | 0.3013 |
| VLEQDKAR                                | 959.1              | 2            | 2.7086 | 0.1151 |
| VLEQHKLTK                               | 1096.3             | 2            | 2.9445 | 0.2269 |
| VLEQLTGQTPVFSK                          | 1547.8             | 2            | 4.4568 | 0.4249 |
| VLEQLTGQTPVFSKAR                        | 1775.0             | 2            | 4.1028 | 0.3195 |
| VLESVVADLLNRFLGDYVENLNKSQLK             | 3078.5             | 3            | 4.7646 | 0.309  |
| VLETAEDIQER                             | 1303.4             | 2            | 4.2297 | 0.3461 |
| VLETAEDIQERR                            | 1459.6             | 2            | 3.0283 | 0.1013 |
| VLETEAVDQPDVVQR                         | 1698.9             | 2            | 4.5135 | 0.3538 |
| VLETLQEKGER                             | 1302.5             | 2            | 2.7153 | 0.1942 |
| VLETPQEIHVSSEAVSLLEEVITPR               | 2878.2             | 2            | 3.9445 | 0.4378 |
| VLEVASGSGQHAHFAR                        | 1737.9             | 2            | 4.9538 | 0.4639 |
| VLEVNPQNK                               | 1041.2             | 2            | 2.4337 | 0.1354 |
| VLEVYTTQPGVQFYTGDFLDGTLK                | 2692.0             | 3            | 3.6455 | 0.2644 |
| VLEYLNQEK                               | 1136.3             | 2            | 3.5636 | 0.2256 |
| VLEYLNQEKAEK                            | 1464.6             | 2            | 3.652  | 0.2884 |
| VLEYLNQEKAEKGREHIA                      | 2128.4             | 2            | 4.9592 | 0.393  |

| Peptide Sequence                       | Peptide mass (m/z) | Charge State | Xcorr  | DelCn2 |
|----------------------------------------|--------------------|--------------|--------|--------|
| VLEYLTAEILELAGNAAR                     | 1947.2             | 2            | 4.5451 | 0.2167 |
| VLFAQEIPASPFR                          | 1562.8             | 2            | 3.7366 | 0.4255 |
| VLFDKVASQGEVVRK                        | 1676.0             | 2            | 3.8724 | 0.3149 |
| VLFPGNSTQYNILEGLEK                     | 2023.3             | 2            | 4.4475 | 0.4197 |
| VLFPGNSTQYNILEGLEKLGK                  | 2264.6             | 2            | 2.7136 | 0.3034 |
| VLFPGLGLGHAAEYVRPR                     | 1896.2             | 2            | 3.0124 | 0.2912 |
| VLFRPSDTANSSNQDALSSNTSLK               | 2553.7             | 3            | 5.7354 | 0.3403 |
| VLFSNNGGVVK                            | 1107.3             | 2            | 3.2804 | 0.2511 |
| VLFFVEKK                               | 863.1              | 2            | 2.6007 | 0.1186 |
| VLGAHILGPGAGEMVNEAALALEYGASCEDIAR      | 3299.7             | 3            | 3.9807 | 0.3247 |
| VLGATLLPDLIQK                          | 1381.7             | 2            | 3.9756 | 0.2924 |
| VLGDVIEVHGK                            | 1166.4             | 2            | 2.6588 | 0.3274 |
| VLGDVIEVHGKHEERQDEHGFISR               | 2788.0             | 3            | 3.6572 | 0.2512 |
| VLGEAMTGISQNAK                         | 1419.6             | 2            | 4.6424 | 0.4824 |
| VLGELWPLFGGR                           | 1344.6             | 2            | 3.5461 | 0.1972 |
| VLGESPVPHTVLNLKEPLYVGGAPDFSK           | 2965.4             | 3            | 6.0331 | 0.4282 |
| VLGFSPVIIDR                            | 1216.5             | 2            | 2.4305 | 0.1968 |
| VLGHVNNILISAVLPTAFR                    | 2035.4             | 2            | 4.0367 | 0.3554 |
| VLGILAMIDEGETDWK                       | 1791.1             | 2            | 5.4894 | 0.5057 |
| VLGILAMIDEGETDWKVIAINVDDPDAANYNDINDVKR | 4217.7             | 3            | 4.7656 | 0.3313 |
| VLGKDHPDVAK                            | 1179.4             | 2            | 3.5027 | 0.3534 |
| VLGMDPLPSK                             | 1057.3             | 2            | 2.7276 | 0.2593 |
| VLGMDPLPSKMPK                          | 1413.8             | 2            | 3.7103 | 0.322  |
| VLGNPKSDEMNVK                          | 1431.6             | 2            | 4.3911 | 0.4459 |
| VLGQGEWRGGDGINSIGGGQK                  | 2215.4             | 3            | 4.2492 | 0.3315 |
| VLGQPHHELDK                            | 1360.5             | 2            | 3.4936 | 0.1041 |
| VLGSGAFGTVYK                           | 1199.4             | 2            | 2.4754 | 0.1282 |
| VLGSLEALEPVHYEEK                       | 1814.0             | 2            | 2.8259 | 0.2198 |
| VLGTAFDPFLGGK                          | 1322.5             | 2            | 3.5503 | 0.3912 |
| VLGTEAVQDPTKVEAHVR                     | 1950.2             | 3            | 3.5281 | 0.3034 |
| VLGTEDLYDYIDKYNIELDPR                  | 2545.8             | 3            | 4.4442 | 0.2962 |
| VLGVPIIVQASQAQK                        | 1552.8             | 2            | 3.4755 | 0.3865 |
| VLGYIQLGQK                             | 1119.3             | 2            | 2.9345 | 0.1868 |
| VLGYIQLGQKEGAK                         | 1504.8             | 2            | 3.17   | 0.1346 |
| VLHAEQEKAK                             | 1153.3             | 2            | 2.9367 | 0.3057 |
| VLHASLQSVLHKEESLGPK                    | 2073.4             | 3            | 3.4728 | 0.4662 |

| Peptide Sequence             | Peptide mass (m/z) | Charge State | Xcorr  | DelCn2 |
|------------------------------|--------------------|--------------|--------|--------|
| VLHDAQQQCR                   | 1198.3             | 2            | 2.5166 | 0.3036 |
| VLHDFNGIVKGLMTTVHAITATQK     | 2596.0             | 3            | 6.2562 | 0.5307 |
| VLHFDQVTENTTEK               | 1661.8             | 2            | 2.9142 | 0.2358 |
| VLHFPNPEDKKLEEIIHQITNVEALIAR | 3268.8             | 3            | 3.3876 | 0.2744 |
| VLHGEQYLELYKPLPR             | 1956.3             | 2            | 5.3227 | 0.476  |
| VLHLLALRPYR                  | 1351.7             | 2            | 2.6408 | 0.2526 |
| VLHLQENNIQTISR               | 1665.9             | 2            | 3.4526 | 0.354  |
| VLHMDRNPYYGGESASITPLEDLYK    | 2870.2             | 3            | 4.0157 | 0.1581 |
| VLHMDRNPYYGGESASITPLEDLYKR   | 3026.4             | 3            | 8.5581 | 0.4775 |
| VLHMDRNPYYGGESSITPLEELYK     | 2900.2             | 3            | 5.9403 | 0.3903 |
| VLHMDRNPYYGGESSITPLEELYKR    | 3056.4             | 3            | 7.6783 | 0.4401 |
| VLHVMGDKPVFSFQPR             | 1858.2             | 2            | 4.2448 | 0.3885 |
| VLHNQLVLFHNAIAAYFAGNQK       | 2469.8             | 3            | 3.5764 | 0.2581 |
| VLHPLEGAVVIIFKK              | 1664.1             | 3            | 3.5334 | 0.3084 |
| VLHTALHSSSSYR                | 1458.6             | 2            | 3.2275 | 0.3256 |
| VLHVDENPVPLTVR               | 1560.8             | 2            | 3.8202 | 0.4763 |
| VLHYLAIQKPADLAR              | 1709.0             | 2            | 4.4346 | 0.3224 |
| VLIAAHGNSLR                  | 1151.3             | 2            | 3.4391 | 0.3752 |
| VLIDWINDVLVGER               | 1641.9             | 2            | 2.5039 | 0.2028 |
| VLEIGSINSVR                  | 1187.4             | 2            | 3.2567 | 0.1835 |
| VLIGALSPGLAADFLK             | 1699.1             | 2            | 4.6411 | 0.3881 |
| VLIGGDETPEGQR                | 1371.5             | 2            | 3.5707 | 0.3379 |
| VLIPSYAAGSIIGK               | 1389.7             | 2            | 2.4752 | 0.1939 |
| VLIQQHEDAK                   | 1181.3             | 2            | 2.4838 | 0.1245 |
| VLIQVGYEPLPPTIGR             | 1753.1             | 2            | 3.2523 | 0.2358 |
| VLISFKANDIEK                 | 1377.6             | 2            | 2.7074 | 0.1403 |
| VLISTDVWAR                   | 1160.3             | 2            | 3.3776 | 0.2062 |
| VLITENDVKEGLQR               | 1614.8             | 2            | 4.0223 | 0.3325 |
| VLITTDLLAR                   | 1115.3             | 2            | 3.5274 | 0.3395 |
| VLIVSEDPPELPMRPPLSK          | 2184.6             | 3            | 3.9982 | 0.3042 |
| VLKAQAQSQK                   | 1101.3             | 2            | 2.4927 | 0.1365 |
| VLKDEIDVK                    | 1059.2             | 2            | 2.5192 | 0.1561 |
| VLKDQPPNSVEGLLNALR           | 1964.3             | 3            | 5.2148 | 0.4379 |
| VLKDSLHEKFPDAGEDELLK         | 2284.6             | 3            | 4.7097 | 0.266  |
| VLKEEGNELVK                  | 1258.4             | 2            | 3.388  | 0.2175 |
| VLKEEGNELVKK                 | 1386.6             | 2            | 3.7055 | 0.1828 |

| Peptide Sequence                       | Peptide mass (m/z) | Charge State | Xcorr  | DelCn2 |
|----------------------------------------|--------------------|--------------|--------|--------|
| VLKEFHQAGKPIGLCCIPVLAAK                | 2508.1             | 3            | 5.3194 | 0.3049 |
| VLKEVEAVIPDHCIFASNTSALPISEIAAVSK       | 3353.9             | 3            | 4.8998 | 0.4396 |
| VLKEYKDVDKK                            | 1365.6             | 2            | 3.4646 | 0.1932 |
| VLKGDVEKLSK                            | 1216.5             | 2            | 3.0912 | 0.1968 |
| VLKKQDAFYKEQLAR                        | 1838.1             | 2            | 4.7286 | 0.4243 |
| VLKPNFAAAWEEVGDTFEKEETFALSSTK          | 3246.6             | 3            | 4.2824 | 0.3153 |
| VLKQVHPDTGISSK                         | 1509.7             | 2            | 4.7404 | 0.4542 |
| VLLALFCHEPCRPLHQLATDSTFSLDQPGGTLDLTLIR | 4193.8             | 3            | 4.494  | 0.2855 |
| VLLATLSIPITPER                         | 1523.8             | 2            | 2.5891 | 0.2736 |
| VLLDDTQSEAAR                           | 1318.4             | 2            | 3.4613 | 0.3198 |
| VLLENQITHFR                            | 1370.6             | 2            | 3.315  | 0.3153 |
| VLLESEQFLTELTR                         | 1678.9             | 2            | 5.5964 | 0.3877 |
| VLLGETGKEK                             | 1074.3             | 2            | 2.7151 | 0.1936 |
| VLLGETGKEKLPR                          | 1440.7             | 2            | 3.8291 | 0.2597 |
| VLLGFSSDESDEASPR                       | 1808.9             | 2            | 3.1283 | 0.2746 |
| VLLGGPGSFYWQGQLISDQVAEIVSK             | 2793.2             | 3            | 4.8744 | 0.2419 |
| VLLGSVSGLAGGFVGTTPADLVNVR              | 2299.7             | 2            | 5.4236 | 0.4895 |
| VLLGVGDPK                              | 898.1              | 2            | 2.7814 | 0.1883 |
| VLLKEILEQGLFSK                         | 1618.0             | 2            | 3.6139 | 0.3964 |
| VLLKSDSPTGDVLLDETLKHIK                 | 2422.8             | 3            | 4.4838 | 0.2661 |
| VLLLSHLAR                              | 1022.3             | 2            | 2.988  | 0.2544 |
| VLLSSPGLEELYR                          | 1589.9             | 2            | 3.8922 | 0.3896 |
| VLLLTGKPKPAGVLGAVNKPLSATGR             | 2559.1             | 3            | 5.2246 | 0.4626 |
| VLLNDGGYDPETGVFTAPLAGR                 | 2426.7             | 2            | 3.0962 | 0.1033 |
| VLLPEYGGTKVVLDDKDYFLFR                 | 2589.0             | 3            | 3.4025 | 0.1971 |
| VLLPEYGGTKVVLDDKDYFLFRDGDILGK          | 3287.7             | 3            | 3.7554 | 0.1811 |
| VLLPVWEAEGGLR                          | 1552.8             | 2            | 3.584  | 0.479  |
| VLLQGKGDSEHK                           | 1311.5             | 2            | 2.9388 | 0.1242 |
| VLLQGKGDSEHKR                          | 1467.7             | 2            | 3.6738 | 0.427  |
| VLLQSKDQITAGNAAR                       | 1685.9             | 2            | 4.6533 | 0.3537 |
| VLLSICSLLCDPNPDDPLVPEIAR               | 2594.0             | 2            | 3.8852 | 0.2911 |
| VLLSLEHGLWAPNLHFHSPNPEIPALLDGR         | 3344.8             | 3            | 6.3938 | 0.3764 |
| VLLTTQGVDMISK                          | 1405.7             | 2            | 4.1993 | 0.3878 |
| VLLVGLKGLGAEIAKNLILAGVK                | 2290.9             | 3            | 3.4026 | 0.165  |
| VLLVLELQGLQK                           | 1353.7             | 2            | 4.1172 | 0.3426 |
| VLLVPGPEKEN                            | 1195.4             | 2            | 2.7778 | 0.255  |

| Peptide Sequence                      | Peptide mass (m/z) | Charge State | Xcorr  | DelCn2 |
|---------------------------------------|--------------------|--------------|--------|--------|
| VLMEKEFPGFLENQKDPLAVDK                | 2548.9             | 3            | 5.4113 | 0.4758 |
| VLMEKEFPGFLENQKDPLAVDKIMK             | 2921.5             | 3            | 5.5874 | 0.2433 |
| VLNDKFASFIDKVR                        | 1652.9             | 2            | 2.5389 | 0.2507 |
| VLNGNKVASEALAR                        | 1442.6             | 2            | 2.9932 | 0.2805 |
| VLNGPEGDGVPEAVVTLNNQIK                | 2264.5             | 2            | 4.9106 | 0.4777 |
| VLNHFSIMQQR                           | 1373.6             | 2            | 2.4091 | 0.2559 |
| VLNLIQSWADAFR                         | 1533.8             | 2            | 4.1343 | 0.4442 |
| VLNNMEIGTSLFDEEGAK                    | 1968.2             | 2            | 5.8759 | 0.384  |
| VLNNMEIGTSLFDEEGAKIVK                 | 2308.6             | 2            | 4.8906 | 0.4446 |
| VLNNMEIGTSLFDEEGAKIVKDLMSK            | 2883.3             | 2            | 4.3807 | 0.346  |
| VLNNMEIGTSLFDEEGAKIVKDLMSKAEK         | 3211.7             | 3            | 4.6727 | 0.2933 |
| VLNQQLTNHIR                           | 1336.5             | 2            | 3.2768 | 0.3482 |
| VLNQQLTNHIRDTLPGLR                    | 2089.4             | 3            | 3.2647 | 0.247  |
| VLNSYWVGEDSTYK                        | 1661.8             | 2            | 2.8785 | 0.275  |
| VLNTEANVVR                            | 1115.3             | 2            | 2.9523 | 0.2664 |
| VLNYAPGPLDTDMQQLAR                    | 2003.3             | 2            | 4.1214 | 0.3684 |
| VLPAQATEYAFAFIQVPQDDAR                | 2566.8             | 3            | 5.4165 | 0.3871 |
| VLPAQATEYAFAFIQVPQDDARTDAVDSVVR       | 3509.8             | 3            | 4.6871 | 0.484  |
| VLPAVGISYVYENMK                       | 1783.1             | 2            | 3.7429 | 0.4333 |
| VLPEFDTPGHTLSWGK                      | 1785.0             | 2            | 4.1786 | 0.4602 |
| VLPEFDTPGHTLSWGKGQK                   | 2098.3             | 2            | 3.2647 | 0.1701 |
| VLPGDYEILATHPTWALK                    | 2025.3             | 2            | 3.2938 | 0.2136 |
| VLPGVDALSN                            | 1098.3             | 2            | 3.3736 | 0.3947 |
| VLPSDLDLLLHMNNAR                      | 1822.1             | 2            | 4.0108 | 0.4581 |
| VLPSITTEILK                           | 1214.5             | 2            | 2.6584 | 0.3328 |
| VLPSIVNEVLKSVVAK                      | 1696.1             | 2            | 4.1593 | 0.391  |
| VLPSIVNEVLKSVVAKFNASQLITQR            | 2855.4             | 3            | 5.0104 | 0.4439 |
| VLPSQTPQPAHHTPDTR                     | 1883.1             | 2            | 3.2756 | 0.2919 |
| VLPTHDASK                             | 968.1              | 1            | 2.0086 | 0.253  |
| VLPTHDASKVK                           | 1195.4             | 2            | 2.6375 | 0.2394 |
| VLPTQPNPVDASR                         | 1394.6             | 2            | 2.6949 | 0.2999 |
| VLPTYDASKVTASGPGGLSSYGVPASLPVDFDAIDAR | 3523.9             | 3            | 3.3864 | 0.1168 |
| VLQALEGLK                             | 971.2              | 1            | 3.2219 | 0.2201 |
| VLQALGSEPIQYAVPVVK                    | 1912.3             | 3            | 4.2842 | 0.3723 |
| VLQAQGSSDPEEESVLYSNR                  | 2209.3             | 2            | 5.0556 | 0.3859 |
| VLQATVVAVGSGSK                        | 1316.5             | 2            | 5.2932 | 0.5445 |

| Peptide Sequence                      | Peptide mass (m/z) | Charge State | Xcorr  | DelCn2 |
|---------------------------------------|--------------------|--------------|--------|--------|
| VLQDMGLPTGAAGR                        | 1444.6             | 2            | 4.2556 | 0.4365 |
| VLQEGLLQLDSILSSLEPLHRPIESPGGSVLLR     | 3568.1             | 3            | 4.033  | 0.3015 |
| VLQHAASNK                             | 968.1              | 2            | 2.7448 | 0.2661 |
| VLQHEKQVYDIAAK                        | 1642.9             | 2            | 3.7929 | 0.3677 |
| VLQHYQESDKGEELGPGNVQK                 | 2356.5             | 2            | 6.7131 | 0.4746 |
| VLQHYQESDKGEELGPGNVQKEVSSSFHDHVIK     | 3585.9             | 3            | 5.1809 | 0.3872 |
| VLQHYQESDKGEELGPGNVQKEVSSSFHDHVIKETTR | 4073.4             | 3            | 5.522  | 0.4459 |
| VLQLINDNTATALSYGVFR                   | 2096.4             | 2            | 6.3778 | 0.5336 |
| VLQLSDTAIVPIGYHVPR                    | 1979.3             | 2            | 4.4525 | 0.4638 |
| VLQQFADNDVSR                          | 1392.5             | 2            | 3.6593 | 0.3763 |
| VLQQKLEAIEDDSVKETDSSSASAATPSK         | 3036.2             | 3            | 6.8737 | 0.4631 |
| VLQQQGSQER                            | 1173.3             | 2            | 3.1251 | 0.2594 |
| VLQQVKAESEHK                          | 1396.6             | 2            | 2.893  | 0.2554 |
| VLQSALAAIR                            | 1042.3             | 2            | 3.0939 | 0.2262 |
| VLQSFTVDSSK                           | 1211.3             | 2            | 3.6371 | 0.3905 |
| VLQSFTVDSSKAGLAPLEVR                  | 2118.4             | 2            | 5.2549 | 0.4253 |
| VLQVSIGPGLPK                          | 1208.5             | 2            | 3.4521 | 0.3216 |
| VLQYHKPVQASYFETLR                     | 2080.4             | 2            | 3.8875 | 0.3877 |
| VLRDNIQGITKPAIR                       | 1695.0             | 3            | 3.6337 | 0.1956 |
| VLREQLQTEQDAPAATR                     | 1927.1             | 3            | 4.4705 | 0.2627 |
| VLRHEEFEEGCK                          | 1476.6             | 2            | 3.2375 | 0.2576 |
| VLRPPGGGSNFSLGFDEPTEQPVRK             | 2686.0             | 3            | 5.8015 | 0.2911 |
| VLRPQVTAVAQQNQGEVPEPQDMK              | 2664.0             | 3            | 4.637  | 0.3623 |
| VLSAPPHFHFGQTNR                       | 1708.9             | 2            | 4.2298 | 0.4727 |
| VLSEAAISASLEKFEIPVK                   | 2032.4             | 3            | 3.5421 | 0.2889 |
| VLSEDEEDVDFDIIHNANDTFTVK              | 2766.9             | 3            | 4.4219 | 0.3282 |
| VLSGDLGQLPTGIR                        | 1426.6             | 2            | 2.8408 | 0.255  |
| VLSGDLGQLPTGIRDFVEHSAR                | 2368.6             | 3            | 3.4939 | 0.3718 |
| VLSGQDTEDR                            | 1120.2             | 2            | 2.4259 | 0.1488 |
| VLSGTIHAGQPVK                         | 1307.5             | 2            | 3.2731 | 0.4175 |
| VLSHSSALTEHQK                         | 1437.6             | 2            | 3.3292 | 0.3439 |
| VLSIGDGIAR                            | 1001.2             | 2            | 3.0765 | 0.2925 |
| VLSIQSHVIR                            | 1152.4             | 2            | 3.3234 | 0.3077 |
| VLSKEFHLNESGDPSSK                     | 1875.0             | 2            | 4.9559 | 0.3648 |
| VLSLLSAPLGSGGFTLLHAAAAAGR             | 2351.7             | 2            | 3.7755 | 0.4909 |
| VLSMAPGLTSVEIIPFR                     | 1831.2             | 3            | 4.854  | 0.4949 |

| Peptide Sequence                     | Peptide mass (m/z) | Charge State | Xcorr  | DelCn2 |
|--------------------------------------|--------------------|--------------|--------|--------|
| VLSNGVQFSR                           | 1107.2             | 2            | 3.1338 | 0.3611 |
| VLSQQAASVVKQEGGDNDLIER               | 2357.6             | 3            | 3.4203 | 0.2964 |
| VLSRPNAQELPSMYQR                     | 1890.2             | 2            | 4.6089 | 0.3784 |
| VLSSHLMHSSLPGLTR                     | 1736.0             | 2            | 3.3295 | 0.3579 |
| VLSTDVDVILRK                         | 1358.6             | 2            | 3.7156 | 0.2961 |
| VLSTVHTHSSVK                         | 1295.5             | 2            | 3.7641 | 0.4261 |
| VLSVDESIKPEQEFFTAPFEK                | 2554.9             | 3            | 3.2285 | 0.2036 |
| VLSVPESTPFTAVLK                      | 1588.9             | 2            | 2.6846 | 0.2957 |
| VLTAVDVDDITSIDDFLAVSENHILEDVNK       | 3202.5             | 3            | 3.6524 | 0.2022 |
| VLTDGSLDSTIPGIENTITVTTEQLTTASFPVGSKK | 3810.2             | 3            | 3.5313 | 0.1229 |
| VLTEDEMGHPEIGDAIAR                   | 1954.2             | 2            | 4.8808 | 0.3717 |
| VLTEIIASR                            | 1002.2             | 2            | 3.0576 | 0.3462 |
| VLTEIIASRTPEELR                      | 1728.0             | 2            | 2.6642 | 0.1261 |
| VLTELLEQER                           | 1230.4             | 2            | 3.7582 | 0.1827 |
| VLTFALSEEVRPQDTVSVIGGVAGGSK          | 2718.1             | 3            | 6.2103 | 0.4624 |
| VLTFDLTKYPDANPNPNEQ                  | 2177.4             | 2            | 4.3724 | 0.3528 |
| VLTFYRKEPFTLEAYYSSPQDLPPDPAIAQFSVQK  | 4211.7             | 3            | 4.2991 | 0.2155 |
| VLTHFFEREPPAASWAVQPHYQLPTAFR         | 3297.7             | 3            | 5.407  | 0.2633 |
| VLTIPTTEFK                           | 1163.3             | 2            | 2.4908 | 0.2447 |
| VLTIQIPGMVVADKTSELYQK                | 2676.2             | 3            | 3.9858 | 0.2829 |
| VLTLSDDLER                           | 1161.3             | 2            | 3.317  | 0.2143 |
| VLTLSEDSPTYETLHSFISNAVAPFFK          | 2914.3             | 3            | 5.2396 | 0.478  |
| VLTLSERPLDFDLERPPPTTPQNEEIR          | 3180.6             | 3            | 4.2223 | 0.338  |
| VLTPELYAELR                          | 1304.5             | 2            | 2.622  | 0.15   |
| VLTQPSQSAVR                          | 1186.3             | 2            | 2.7368 | 0.1866 |
| VLTVINQTQK                           | 1144.3             | 2            | 3.0708 | 0.2025 |
| VLTVINQTQKENIR                       | 1656.9             | 2            | 4.32   | 0.3865 |
| VLTVINQTQKENLR                       | 1656.9             | 2            | 4.3065 | 0.4342 |
| VLTVINQTQKENLRK                      | 1785.1             | 2            | 4.4892 | 0.3259 |
| VLVAQHADVYK                          | 1172.4             | 2            | 3.2564 | 0.322  |
| VLVAQHADVYKGLLPEELTPLILATQK          | 2890.4             | 3            | 5.8164 | 0.3973 |
| VLVDGEEHVGFLK                        | 1442.6             | 2            | 3.0277 | 0.3225 |
| VLVDMDGVLADFEAGLLR                   | 1934.2             | 2            | 6.0472 | 0.4706 |
| VLVDQTTGLSR                          | 1189.3             | 2            | 3.7923 | 0.4017 |
| VLVDSSFGQPTTQGEAR                    | 1792.9             | 2            | 5.4957 | 0.4902 |
| VLVEPDAGAGVAVMK                      | 1456.7             | 2            | 3.5377 | 0.3858 |

| Peptide Sequence                           | Peptide mass (m/z) | Charge State | Xcorr  | DelCn2 |
|--------------------------------------------|--------------------|--------------|--------|--------|
| VLVEQQQDR                                  | 1115.2             | 2            | 2.5702 | 0.2078 |
| VLVFMVGK                                   | 893.2              | 2            | 3.0748 | 0.2666 |
| VLVGGGTGFIGTALTQLLNAR                      | 2059.4             | 2            | 5.7957 | 0.4593 |
| VLVGKNFEDVAFDEKK                           | 1839.1             | 3            | 4.5404 | 0.3417 |
| VLVHPPQDGEDEPTLVQKEPVEAAPAAEPVPAST         | 3519.9             | 3            | 4.3707 | 0.2334 |
| VLVNDAQKVTGQQER                            | 1815.0             | 2            | 4.9291 | 0.4418 |
| VLVQNAAGSQEK                               | 1244.4             | 2            | 3.4299 | 0.2441 |
| VLVSLSAGGR                                 | 959.1              | 1            | 2.9676 | 0.2142 |
| VLVSLSAGGRDEGNYLDDALVR                     | 2320.5             | 3            | 5.7383 | 0.5446 |
| VLVSLSAGGRDEGNYLDDALVRQDAQDLYEAGEK         | 3668.9             | 3            | 4.8989 | 0.4228 |
| VLVSLSAGGRDEGNYLDDALVRQDAQDLYEAGEKK        | 3797.1             | 3            | 4.6008 | 0.3364 |
| VLVTGATGLLGR                               | 1157.4             | 2            | 4.2137 | 0.2437 |
| VLVTGGAGYIGSHTVLELLEAGYLPVVIDNFHNAFR       | 3844.4             | 3            | 5.7165 | 0.4527 |
| VLVVHDGFEGFLAK                             | 1384.6             | 2            | 3.4305 | 0.4087 |
| VLWLADCDVSDSSCSLAATLLANHSLR                | 2949.3             | 3            | 3.331  | 0.1011 |
| VLWLDEIQQAVDEANVDEDR                       | 2358.5             | 2            | 3.1993 | 0.301  |
| VLDFVMDDTISPYSR                            | 1922.1             | 2            | 2.4732 | 0.1027 |
| VLDFGDHLYSDLADMLR                          | 2142.5             | 2            | 3.1073 | 0.2944 |
| VLYLGAASGTTVSHVSDIIGPDGLVYAVEFSHR          | 3432.8             | 3            | 4.2526 | 0.1971 |
| VLYLGAASGTTVSHVSDIVGPDGLVYAVEFSHR          | 3418.8             | 3            | 5.9152 | 0.4009 |
| VLVYQDSLEGEAR                              | 1479.6             | 2            | 3.4289 | 0.2039 |
| VMAGALEGDIFIGPK                            | 1518.8             | 2            | 3.07   | 0.1039 |
| VMAGALEGDLFIGPK                            | 1518.8             | 2            | 4.3075 | 0.3193 |
| VMALELGPHK                                 | 1095.3             | 2            | 2.7668 | 0.2583 |
| VMALWHQLHVNTK                              | 1577.9             | 2            | 3.5233 | 0.3493 |
| VMATTGGMGMGPGGPGMITIPPSILNNPNIPNEIIHALQAGR | 4197.9             | 3            | 5.2234 | 0.3678 |
| VMAVDALASSHPLSTPASEINTPAQISELFDIAISYSK     | 3863.3             | 3            | 6.7257 | 0.4569 |
| VMDEVEKAR                                  | 1077.2             | 2            | 2.5675 | 0.2383 |
| VMDKYTFELSR                                | 1389.6             | 2            | 3.4284 | 0.2706 |
| VMDMLHSMGPDVTVVITSSDLPSQGSNYLIVLGSQR       | 3847.4             | 3            | 5.0025 | 0.2885 |
| VMDQHKLTR                                  | 1128.3             | 2            | 3.0616 | 0.3028 |
| VMDRPGNYVEPTIVTGLGHASIAHTETFAPILYVFK       | 4061.6             | 3            | 6.2296 | 0.4693 |
| VMEGLDAFDDLMQHTHIQPWYLR                    | 2817.2             | 3            | 5.3842 | 0.3678 |
| VMEIVDADEKVR                               | 1404.6             | 2            | 2.884  | 0.1247 |
| VMEKETEK                                   | 994.1              | 2            | 2.6077 | 0.144  |
| VMEKETEKR                                  | 1150.3             | 2            | 2.551  | 0.1814 |



| Peptide Sequence               | Peptide mass (m/z) | Charge State | Xcorr  | DelCn2 |
|--------------------------------|--------------------|--------------|--------|--------|
| VMELESKLNEAKEEFTSGGPLGQK       | 2622.9             | 3            | 4.3928 | 0.272  |
| VMENGLLFKELLQTPNFR             | 2150.5             | 2            | 2.5706 | 0.2585 |
| VMFTEDLKLPAFDAR                | 1841.1             | 2            | 2.7488 | 0.122  |
| VMGALNTVVENLHDPDKVSSVLALVGK    | 2807.3             | 3            | 4.6851 | 0.3503 |
| VMGEVVK                        | 719.9              | 1            | 1.9599 | 0.1761 |
| VMGTFSTVTSTVK                  | 1358.6             | 2            | 2.5646 | 0.1098 |
| VMIPQDEYPEINFGVLLIGPR          | 2401.8             | 3            | 3.2899 | 0.1557 |
| VMIYQDEVKLPVK                  | 1534.8             | 2            | 3.7834 | 0.2072 |
| VMKEFVGGNTPNVLTLVDNWFYQVTQGIGR | 3237.7             | 3            | 4.9911 | 0.4804 |
| VMKGVDDLDFFIGDEAIEKPTYATK      | 2804.2             | 3            | 5.0796 | 0.4063 |
| VMLGETNPADSKPGTIR              | 1787.0             | 2            | 5.2902 | 0.4062 |
| VMLTTAGGTK                     | 979.2              | 2            | 2.8553 | 0.3762 |
| VMLVNSMNTVK                    | 1236.5             | 2            | 2.6514 | 0.181  |
| VMNILHR                        | 883.1              | 2            | 2.5608 | 0.1521 |
| VMNTGSQFVMEGVK                 | 1527.8             | 2            | 4.3483 | 0.4474 |
| VMPNAIVQSVGVSSGK               | 1573.8             | 2            | 3.8898 | 0.4172 |
| VMPYVDILFGNETEAATFAR           | 2245.5             | 2            | 3.4054 | 0.2196 |
| VMQEEIFGPILPIVPVK              | 1910.4             | 2            | 4.3743 | 0.4006 |
| VMQEEIFGPILPIVPVKNVDEAINFINER  | 3325.9             | 3            | 3.9098 | 0.2007 |
| VMQEQGTHPK                     | 1155.3             | 2            | 3.2827 | 0.2973 |
| VMQQQQQTQQQLPQK                | 1943.2             | 2            | 4.5267 | 0.1869 |
| VMQVLNADAIVVK                  | 1400.7             | 2            | 3.8585 | 0.2188 |
| VMQVVDEKLPGLLGNFPGPFEEEMK      | 2805.3             | 3            | 4.5956 | 0.2089 |
| VMRVEYHFLSPYVSPK               | 1953.3             | 3            | 3.4295 | 0.159  |
| VMSEFNNFR                      | 1258.4             | 2            | 2.6247 | 0.1788 |
| VMSQEIQEQLHK                   | 1470.7             | 2            | 4.0001 | 0.2808 |
| VMSQEIQEQLHKQQEVIADK           | 2382.7             | 3            | 3.3138 | 0.1289 |
| VMTDESGKSK                     | 1082.2             | 2            | 2.5561 | 0.1076 |
| VMTIAPGLFGTPLLTSLEPK           | 2086.5             | 2            | 4.2005 | 0.3825 |
| VMVAEALDISRETYLAILMDR          | 2410.8             | 3            | 3.6035 | 0.3003 |
| VMVDANEVPIQK                   | 1343.6             | 2            | 3.8722 | 0.3494 |
| VMVLDFVTPPLGTR                 | 1647.0             | 2            | 4.5742 | 0.4321 |
| VMVQPINLIFR                    | 1330.7             | 2            | 3.4152 | 0.2703 |
| VMVTNVTSLLK                    | 1205.5             | 2            | 3.5757 | 0.3074 |
| VMYEKEAK                       | 998.2              | 2            | 2.6537 | 0.1714 |
| VNAGDQPGADLGPLITPQAK           | 1963.2             | 2            | 6.0812 | 0.5077 |

| Peptide Sequence                   | Peptide mass (m/z) | Charge State | Xcorr  | DelCn2 |
|------------------------------------|--------------------|--------------|--------|--------|
| VNAIEHVIIPR                        | 1261.5             | 2            | 3.6239 | 0.3789 |
| VNAVPRPIPEKK                       | 1348.6             | 2            | 2.7028 | 0.2754 |
| VNDFLAEIFKK                        | 1324.5             | 2            | 2.9778 | 0.1094 |
| VNDKNPHVALYALEVMESVVK              | 2356.7             | 3            | 4.0377 | 0.2977 |
| VNDTIQIDLETGK                      | 1446.6             | 2            | 2.9861 | 0.1119 |
| VNDTIQIDLETGKITDFIK                | 2164.4             | 2            | 4.5487 | 0.3034 |
| VNDVNEFAPVFVER                     | 1635.8             | 2            | 3.0343 | 0.1055 |
| VNEAREELMR                         | 1247.4             | 2            | 2.6176 | 0.1964 |
| VNESSHYDLAFTDVHFKPGQIR             | 2561.8             | 3            | 5.5586 | 0.3987 |
| VNFAMNVGK                          | 980.2              | 1            | 2.9255 | 0.3024 |
| VNFDDYTVNLGGLKDHDK                 | 2049.3             | 2            | 4.5619 | 0.3732 |
| VNFEDDSRGK                         | 1167.2             | 2            | 2.6471 | 0.1979 |
| VNFHFILFNNVDGHLIYELDGR             | 2520.8             | 3            | 3.2025 | 0.2189 |
| VNFPENGFLSPDKLSLLEK                | 2148.4             | 2            | 4.1513 | 0.3355 |
| VNFSPPGDTNSLFPGTWYLER              | 2398.6             | 2            | 2.5062 | 0.1996 |
| VNFTVDQIR                          | 1092.2             | 2            | 3.4717 | 0.3107 |
| VNGDASPAAAESGAK                    | 1345.4             | 2            | 3.9918 | 0.4449 |
| VNGEDPYPHKHFHVDISLTDIFIQK          | 2701.0             | 3            | 3.4502 | 0.229  |
| VNGRPLEMIEPR                       | 1411.7             | 2            | 3.4049 | 0.2346 |
| VNGVDDAANFR                        | 1178.2             | 2            | 3.1998 | 0.3069 |
| VNHVPEAGSR                         | 1213.3             | 2            | 3.2639 | 0.3053 |
| VNHLYSDLSDALVIFQLYEK               | 2368.7             | 2            | 4.9267 | 0.3883 |
| VNHPQVSALLGEEDEEALHYLTR            | 2621.8             | 3            | 5.2007 | 0.2702 |
| VNHVEKPPKVESK                      | 1491.7             | 2            | 3.024  | 0.2268 |
| VNHVTLISQPK                        | 1123.3             | 2            | 3.2955 | 0.3038 |
| VNIAFNVDMPEDSDTYLHR                | 2301.5             | 2            | 5.4452 | 0.4565 |
| VNIGQGSHPPK                        | 1165.3             | 2            | 3.0337 | 0.327  |
| VNIGQGSHPPQKVKVFGPGVER             | 2234.5             | 3            | 4.8207 | 0.4312 |
| VNIGSSFENRPMNVLK                   | 1806.1             | 2            | 3.9756 | 0.1478 |
| VNILDFVVK                          | 1095.3             | 2            | 3.2009 | 0.1889 |
| VNILDFVKK                          | 1223.5             | 2            | 2.9928 | 0.195  |
| VNINAALVEDIINLEEVNEEMKSVIEALKDNFNK | 3860.3             | 3            | 4.2707 | 0.2109 |
| VNINGGAVSLGHPIGMSGAR               | 1908.2             | 2            | 4.8302 | 0.524  |
| VNKEVER                            | 874.0              | 2            | 2.4709 | 0.1548 |
| VNKITITNDKGR                       | 1359.6             | 2            | 2.7549 | 0.1581 |
| VNKYGDTWDE                         | 1227.3             | 2            | 3.1055 | 0.3621 |

| Peptide Sequence                    | Peptide mass (m/z) | Charge State | Xcorr  | DelCn2 |
|-------------------------------------|--------------------|--------------|--------|--------|
| VNLAELFK                            | 934.1              | 2            | 2.9304 | 0.249  |
| VNLESPGPER                          | 1098.2             | 2            | 2.8997 | 0.1864 |
| VNLGVGAYR                           | 949.1              | 2            | 2.485  | 0.159  |
| VNLKYDSWHK                          | 1290.5             | 2            | 2.7937 | 0.2892 |
| VNLLSFTGSTQVGK                      | 1451.6             | 2            | 4.5978 | 0.4021 |
| VNLLYSR                             | 865.0              | 1            | 1.7316 | 0.1553 |
| VNLSAAQTLR                          | 1073.2             | 2            | 3.2273 | 0.2897 |
| VNMPPAVDPAEFFVLMER                  | 2063.4             | 2            | 3.7638 | 0.4259 |
| VNNASLIGLGYTQTLRPGVK                | 2102.4             | 3            | 3.256  | 0.1011 |
| VNNRFELINIDLEDDPVVNGER              | 2686.9             | 3            | 3.8882 | 0.135  |
| VNSSLIGLGYTQTLKPGIK                 | 2104.4             | 3            | 5.2219 | 0.441  |
| VNSSLIGVGYTQTLRPGVK                 | 2104.4             | 2            | 4.653  | 0.4192 |
| VNNSTGTSEDPSLQR                     | 1605.6             | 2            | 4.5254 | 0.374  |
| VNNSTMLGASGDYADFQYLK                | 2195.4             | 2            | 5.4782 | 0.5307 |
| VNPALAEINLR                         | 1210.4             | 2            | 3.59   | 0.4223 |
| VNPCIGGVILFHETLYQK                  | 2032.4             | 2            | 4.9035 | 0.4192 |
| VNPIQGLASK                          | 1027.2             | 2            | 2.7306 | 0.2913 |
| VNPSQTHNNLYAWGQETGAPILTDDVSLQVFMHLK | 4169.6             | 3            | 6.5794 | 0.4641 |
| VNPSQTHNNMYAWGQESGAPILTDDVSLQVFMHLK | 4173.6             | 3            | 5.0277 | 0.3188 |
| VNPTVFFDIAVDGEPLGR                  | 1947.2             | 2            | 5.7117 | 0.5578 |
| VNQIGSVTEAIQACK                     | 1561.8             | 2            | 4.3497 | 0.5012 |
| VNQIGSVTESIQACK                     | 1577.8             | 2            | 4.4956 | 0.2127 |
| VNQIGSVTESLQACK                     | 1577.8             | 2            | 4.2353 | 0.326  |
| VNQPASFAIR                          | 1103.3             | 2            | 2.7344 | 0.2738 |
| VNQQPNTSDKK                         | 1259.4             | 2            | 2.5575 | 0.1309 |
| VNQWTTNVVEQTLSQLTK                  | 2090.3             | 2            | 5.123  | 0.4697 |
| VNREIVSGMK                          | 1133.3             | 2            | 2.7124 | 0.2072 |
| VNSEQEHFLIVPFGLLYSEVTASSLVK         | 3008.4             | 3            | 3.6724 | 0.2876 |
| VNSININQGSITFAGGPGRDGTIDFTPGSELLITK | 3592.0             | 3            | 5.5762 | 0.4002 |
| VNSKFDTIYQILLK                      | 1683.0             | 2            | 4.5281 | 0.398  |
| VNSKFDTIYQILLKK                     | 1811.2             | 3            | 3.5522 | 0.2696 |
| VNSQRPFNAEPPPELLTENYITPNPIFFTR      | 3503.9             | 3            | 5.3701 | 0.4134 |
| VNSVSSGLAEEDLETLLQSR                | 2148.3             | 2            | 5.7291 | 0.4457 |
| VNTFSALANIDLALAEQGDALALFR           | 2563.9             | 3            | 4.271  | 0.324  |
| VNTLIRPDGEK                         | 1242.4             | 2            | 3.2689 | 0.2578 |
| VNTLMHYNVR                          | 1247.5             | 2            | 2.402  | 0.1159 |

| Peptide Sequence           | Peptide mass (m/z) | Charge State | Xcorr  | DelCn2 |
|----------------------------|--------------------|--------------|--------|--------|
| VNTSKGFLIDGYPR             | 1567.8             | 2            | 2.4688 | 0.2229 |
| VNVDEVGGEALGR              | 1315.4             | 2            | 3.8411 | 0.3982 |
| VNVDIINFGEEEVNTEK          | 1950.1             | 2            | 3.6685 | 0.2063 |
| VNVDKVLER                  | 1072.2             | 2            | 3.152  | 0.2247 |
| VNVEAPDVNLEGLGGK           | 1611.8             | 2            | 4.3017 | 0.3385 |
| VNVEHMTEK                  | 1087.2             | 2            | 2.468  | 0.2727 |
| VNVGAGSHPNK                | 1080.2             | 2            | 2.9396 | 0.3189 |
| VNVGAGSHPNKVK              | 1307.5             | 2            | 3.6193 | 0.3789 |
| VNVPGSQAQLK                | 1141.3             | 2            | 2.6075 | 0.2688 |
| VNVPVIGGHAGK               | 1148.3             | 2            | 3.7287 | 0.3849 |
| VNVTHKEEIIILTPIEVAIEDMQK   | 2651.1             | 3            | 5.4343 | 0.4213 |
| VNVTHKEEIIILTPIEVAIEDMQKK  | 2779.2             | 3            | 3.39   | 0.2    |
| VNVTVDYIRPASPATETVPAFSEK   | 2620.9             | 3            | 5.395  | 0.469  |
| VNVVAPGFVHTDMTK            | 1615.9             | 2            | 3.8252 | 0.3508 |
| VNVYHHLVETLK               | 1452.7             | 2            | 3.4533 | 0.3839 |
| VNYGAYINDFK                | 1304.4             | 2            | 3.8568 | 0.2765 |
| VPADLGAEAGLQQLLGALR        | 1893.2             | 2            | 6.1694 | 0.5195 |
| VPADLGAEAGLQQLLGALRELPRPK  | 2614.0             | 3            | 3.5057 | 0.2591 |
| VPADTEVVCAPPTAYIDFAR       | 2136.4             | 3            | 4.7553 | 0.3432 |
| VPAEGLEEVLTTPETVLTGHTEK    | 2451.7             | 3            | 4.2111 | 0.2908 |
| VPAINVNDVTK                | 1257.4             | 2            | 3.7464 | 0.3839 |
| VPAQSESVR                  | 973.1              | 2            | 2.5753 | 0.2097 |
| VPASQRPESKPEQIPPQRPQR      | 2610.9             | 3            | 4.1361 | 0.2382 |
| VPDDIYKTHLENNR             | 1714.9             | 2            | 4.7448 | 0.45   |
| VPDDIYKTHLENNRFGGSGSQVDSAR | 2864.0             | 3            | 3.7158 | 0.2299 |
| VPDKLLDSSTVTHLTK           | 1801.1             | 3            | 5.713  | 0.3465 |
| VPDLKDLPIGK                | 1310.5             | 2            | 3.7682 | 0.3886 |
| VPDSTYEMIGGLDK             | 1525.7             | 2            | 3.4936 | 0.4086 |
| VPEANSSWMDTVIR             | 1605.8             | 2            | 2.7757 | 0.1964 |
| VPEARPNMVEHPEFLK           | 2080.4             | 3            | 4.344  | 0.3536 |
| VPEEDLKR                   | 986.1              | 2            | 2.4352 | 0.1114 |
| VPEGLEDVSKYPDLIAELLR       | 2257.6             | 3            | 5.1929 | 0.3989 |
| VPEGVAGAPNEAALLALMER       | 2009.3             | 2            | 5.6226 | 0.5449 |
| VPENTMHAMQQK               | 1414.6             | 2            | 4.042  | 0.3634 |
| VPERAPLPPPAPSQFQAR         | 1959.2             | 3            | 4.6445 | 0.4685 |
| VPEVPTAPATDAAPK            | 1464.6             | 2            | 3.834  | 0.3258 |

| Peptide Sequence                  | Peptide mass (m/z) | Charge State | Xcorr  | DelCn2 |
|-----------------------------------|--------------------|--------------|--------|--------|
| VPFDAATLHTSTAMAAQHGMDDDGTGQK      | 2875.1             | 3            | 5.8028 | 0.4688 |
| VPFIHVGNGVVSELGPVQFVK             | 2407.8             | 3            | 4.2764 | 0.2467 |
| VPFLVAETPR                        | 1129.3             | 2            | 3.0312 | 0.3151 |
| VPFLVLECPNLK                      | 1372.7             | 2            | 3.6295 | 0.2483 |
| VPFPSIQAVK                        | 1086.3             | 2            | 3.0512 | 0.2443 |
| VPGNFHVSTHSATAQPQNPDMTTHVIHK      | 2952.3             | 3            | 4.287  | 0.162  |
| VPGPVQQALQSAEMSLDEIEQVILVGGATR    | 3137.6             | 3            | 3.7696 | 0.1698 |
| VPGPVQQALQSAEMSLDEIEQVILVGGATRVPR | 3490.0             | 3            | 5.2552 | 0.4521 |
| VPHDPVALEEHRDDDEGPVSNQGYMPYLNR    | 3598.9             | 3            | 4.484  | 0.3684 |
| VPHNAAVQVYDYR                     | 1532.7             | 2            | 3.5756 | 0.4758 |
| VPHNAAVQVYDYREK                   | 1790.0             | 2            | 2.8156 | 0.2691 |
| VPHSLDLSSPNMANTVNAALKPLETLR       | 2977.4             | 3            | 4.9452 | 0.5181 |
| VPIDIDKTKVQNIHPVESAK              | 2232.6             | 3            | 5.6806 | 0.4794 |
| VPINESFISMVIGR                    | 1562.9             | 2            | 3.4983 | 0.4072 |
| VPIPWVSGTSASTPVFGGILSLINEHR       | 2836.2             | 3            | 5.8357 | 0.5691 |
| VPKKEESVKK                        | 1172.4             | 2            | 2.8724 | 0.195  |
| VPLALFALNR                        | 1114.4             | 2            | 2.8867 | 0.3375 |
| VPLKFPVQENASHLHGR                 | 1930.2             | 2            | 4.2252 | 0.4292 |
| VPLPSLSPTMQAGTIAR                 | 1740.1             | 2            | 4.0634 | 0.4037 |
| VPLQQNFQDNQFQGK                   | 1791.9             | 2            | 4.638  | 0.4357 |
| VPLVAEKPLKEPK                     | 1448.8             | 2            | 3.3764 | 0.3409 |
| VPPAINQFTQALDR                    | 1570.8             | 2            | 3.321  | 0.4235 |
| VPPVQVSPLIK                       | 1177.5             | 2            | 3.3556 | 0.252  |
| VPQAEGPPKR                        | 1079.2             | 2            | 2.5895 | 0.3095 |
| VPQIAFVITGGK                      | 1230.5             | 2            | 2.7204 | 0.2404 |
| VPQIEVETHK                        | 1180.3             | 2            | 2.8075 | 0.2565 |
| VPQVSTPTLVEVSR                    | 1512.7             | 2            | 3.5301 | 0.4105 |
| VPREQIVVDLSHPGVSEDDQVSR           | 2562.8             | 2            | 4.2754 | 0.3731 |
| VPSENVLGEVGSFGK                   | 1519.7             | 2            | 3.831  | 0.3622 |
| VPSENVLGEVGSFGK VAMHILNNGR        | 2626.0             | 3            | 3.569  | 0.1086 |
| VPSGFYVGSYVHGAMQSPSLHK            | 2349.7             | 3            | 3.6326 | 0.2848 |
| VPSGGYSSINNVQDPQKPEPR             | 2270.4             | 3            | 3.219  | 0.2589 |
| VPSHAVVAR                         | 936.1              | 2            | 2.8757 | 0.2766 |
| VPSLVGSFIR                        | 1075.3             | 2            | 3.4657 | 0.2447 |
| VPSLVGSFLR                        | 1075.3             | 2            | 3.2723 | 0.1918 |
| VSPGYGSPAAGAASADTAAR              | 1875.0             | 2            | 3.5227 | 0.3401 |

| Peptide Sequence                           | Peptide mass (m/z) | Charge State | Xcorr  | DelCn2 |
|--------------------------------------------|--------------------|--------------|--------|--------|
| VPSTAEALASSLMGLFEK                         | 1981.3             | 2            | 4.8458 | 0.4353 |
| VPSYQALLR                                  | 1047.2             | 2            | 2.7126 | 0.298  |
| VPTADLEDVLPLAEDITNILSK                     | 2367.7             | 2            | 5.5962 | 0.4274 |
| VPTANVSVVDLTCR                             | 1474.7             | 2            | 4.5475 | 0.4581 |
| VPTANVSVVDLTCRLEKPAKYDDIK                  | 2776.2             | 3            | 3.9819 | 0.3193 |
| VPTANVSVVDLTCRLEKPAKYDDIKK                 | 2904.4             | 3            | 5.534  | 0.3951 |
| VPTTGIIIEYPFLENIIFR                        | 2238.6             | 2            | 4.6818 | 0.3092 |
| VPTTGIIIEYPFDLQSVIFR                       | 2196.5             | 2            | 4.265  | 0.3273 |
| VPTVSRPYSFIEFDTFIQK                        | 2275.6             | 3            | 4.1174 | 0.2549 |
| VPVAVQGEDTVQSLTQGDGVAK                     | 2199.4             | 3            | 4.2858 | 0.2338 |
| VPVHDVTDASK                                | 1168.3             | 2            | 3.5204 | 0.3114 |
| VPVKDVVDPSK                                | 1183.4             | 2            | 3.0429 | 0.1952 |
| VPVPEDKYTAQVDAEEKEDVK                      | 2390.6             | 3            | 4.9767 | 0.3462 |
| VQAAEHTLR                                  | 1025.1             | 2            | 3.0778 | 0.2728 |
| VQAAQSEAKVVSQYHELVVQAR                     | 2441.7             | 3            | 3.8968 | 0.2825 |
| VQAEREAQSR                                 | 1245.3             | 2            | 2.5394 | 0.1246 |
| VQAINVSSR                                  | 974.1              | 2            | 2.6124 | 0.1366 |
| VQALTTDISLIFAALKDSK                        | 2035.4             | 2            | 4.1753 | 0.452  |
| VQAMQISSEKEEDDNEKR                         | 2137.3             | 3            | 3.5921 | 0.3062 |
| VQANLGAPDINIEGLDAK                         | 1839.0             | 2            | 4.8658 | 0.3433 |
| VQAQGHTLQVAGLR                             | 1478.7             | 2            | 3.4994 | 0.4316 |
| VQAQVIQETIVKPEPPPEFEFIADPPSISAFDLDVVK      | 4095.6             | 3            | 4.8236 | 0.4329 |
| VQASLAANTFTITGHAETK                        | 1961.2             | 2            | 5.2862 | 0.4748 |
| VQASLSANTFAITGHAEAKPITEMLPGILSQLGADSLTSLR  | 4211.8             | 3            | 4.4581 | 0.2816 |
| VQASLSANTFAITGHAEAKPITEMLPGILSQLGADSLTSLRK | 4340.0             | 3            | 5.0252 | 0.3815 |
| VQAVQPTLILQDGDVINLGDR                      | 2265.6             | 3            | 5.6858 | 0.4618 |
| VQAVVAVAR                                  | 913.1              | 2            | 3.1164 | 0.2274 |
| VQCCLYFIAPSGHGLKPLDIEFMK                   | 2711.3             | 3            | 3.6906 | 0.2733 |
| VQDAVQQHQK                                 | 1309.4             | 2            | 3.7404 | 0.2799 |
| VQDDEVGDGTTSVTVLAAELLR                     | 2289.5             | 2            | 6.0634 | 0.5004 |
| VQDDVTKDLR                                 | 1302.5             | 2            | 2.8664 | 0.1143 |
| VQDHIQSR                                   | 983.1              | 2            | 2.5353 | 0.1423 |
| VQEAVNYGLQVLDSAFEQLDIK                     | 2480.8             | 3            | 5.1321 | 0.353  |
| VQEEFDIDMDAPETER                           | 1925.0             | 2            | 4.7098 | 0.4388 |
| VQELETSLAELR                               | 1388.5             | 2            | 3.006  | 0.1833 |
| VQELQQQSAR                                 | 1187.3             | 2            | 3.288  | 0.1916 |

| Peptide Sequence                | Peptide mass (m/z) | Charge State | Xcorr  | DelCn2 |
|---------------------------------|--------------------|--------------|--------|--------|
| VQENQMDKAR                      | 1219.4             | 2            | 2.9819 | 0.1824 |
| VQENSPGHR                       | 1024.1             | 2            | 2.9334 | 0.2603 |
| VQEQELKSEFEQNLSEK               | 2066.2             | 2            | 5.7467 | 0.4627 |
| VQEQELKSEFEQNLSEKLSEQELQFR      | 3197.5             | 3            | 5.8924 | 0.4584 |
| VQEQELKSEFEQNLSEKLSEQELQFR      | 3353.6             | 3            | 4.9807 | 0.2529 |
| VQEQELTR                        | 1003.1             | 2            | 2.6824 | 0.1034 |
| VQEQLHMAEK                      | 1213.4             | 2            | 2.6305 | 0.1537 |
| VQEQVHTLLSQDQAQAAR              | 2023.2             | 2            | 6.4578 | 0.5443 |
| VQESADELQK                      | 1147.2             | 2            | 3.3205 | 0.2044 |
| VQESLKKQEGLLK                   | 1500.8             | 2            | 4.632  | 0.2114 |
| VQESTKGPDEAK                    | 1289.4             | 2            | 4.2887 | 0.3248 |
| VQESTKGPDEAKIK                  | 1530.7             | 2            | 4.5932 | 0.3231 |
| VQETGDIVISNAYVDLAPTSGTSK        | 2537.8             | 3            | 4.6569 | 0.384  |
| VQETGDIVISNAYVDLAPTSGTSKTPSEGGK | 3194.5             | 3            | 4.0504 | 0.2386 |
| VQETGEIKEPLEISISQDVHDSK         | 2582.8             | 3            | 4.4703 | 0.1795 |
| VQEVQVVGKDDR                    | 1471.6             | 2            | 3.8413 | 0.3919 |
| VQGEAQKVER                      | 1144.3             | 2            | 2.6879 | 0.1455 |
| VQHVIHYQVPR                     | 1376.6             | 2            | 3.406  | 0.2899 |
| VQIAVANAQELLQR                  | 1553.8             | 2            | 5.0256 | 0.3831 |
| VQIEHISSLIK                     | 1267.5             | 2            | 3.7495 | 0.3265 |
| VQILKDYVR                       | 1134.4             | 2            | 3.3281 | 0.2441 |
| VQIYHNPTANSFR                   | 1547.7             | 2            | 4.0796 | 0.3496 |
| VQKEQADKLAR                     | 1286.5             | 2            | 2.7531 | 0.2048 |
| VQLDLAETDLSQGVAR                | 1715.9             | 2            | 5.5207 | 0.4444 |
| VQLLQDLQDFFR                    | 1522.7             | 2            | 4.3801 | 0.2527 |
| VQLREQHLYYQDQLLPVSR             | 2386.7             | 3            | 5.2513 | 0.3739 |
| VQLSGPQEAKEYVLHMIEDGEIFASINQK   | 3275.7             | 3            | 4.1264 | 0.3056 |
| VQLSNDFDEYIMAIEQTIK             | 2258.5             | 2            | 4.6215 | 0.3408 |
| VQLSNDFDEYIMAIEQTIKSGSDEVQVGQQR | 3529.8             | 3            | 3.5586 | 0.1566 |
| VQLVVGDGR                       | 943.1              | 2            | 2.9906 | 0.191  |
| VQNATLAVANITNADSATR             | 1931.1             | 2            | 5.7025 | 0.4951 |
| VQNIHPVESAK                     | 1222.4             | 2            | 3.6987 | 0.3681 |
| VQNMALYADVGGK                   | 1366.6             | 2            | 3.8432 | 0.3464 |
| VQQAVWEHQR                      | 1281.4             | 2            | 2.6399 | 0.1958 |
| VQQELSRPGMLEMLLPGQPEAVAR        | 2651.1             | 3            | 4.5699 | 0.3114 |
| VQQGERDFEQISK                   | 1564.7             | 2            | 3.2582 | 0.1382 |

| Peptide Sequence                  | Peptide mass (m/z) | Charge State | Xcorr  | DelCn2 |
|-----------------------------------|--------------------|--------------|--------|--------|
| VQQQEDEITVLK                      | 1430.6             | 2            | 2.8197 | 0.1156 |
| VQQQEDEITVLKAALADVLR              | 2240.5             | 3            | 3.3106 | 0.2091 |
| VQQTVDLDFGR                       | 1291.4             | 2            | 4.0284 | 0.3211 |
| VQQVQPAMQAVIR                     | 1468.8             | 2            | 4.4941 | 0.3577 |
| VQRSEDTLKALEDFLASLR               | 2192.5             | 3            | 3.8607 | 0.3786 |
| VQSATHFKK                         | 1046.2             | 2            | 2.789  | 0.1225 |
| VQSGNINAAK                        | 1002.1             | 2            | 2.5328 | 0.108  |
| VQSGSESVIQEYVDLR                  | 1810.0             | 2            | 4.7331 | 0.3902 |
| VQSHILHLEHDLVHVTR                 | 2034.3             | 3            | 3.7984 | 0.4026 |
| VQSINYNPFDQK                      | 1453.6             | 2            | 2.5058 | 0.1768 |
| VQSINYNPFDQKLYVYNDGYLLNYDLSVLQKPQ | 3954.4             | 3            | 6.7462 | 0.5235 |
| VQSLEGEKLSPK                      | 1315.5             | 2            | 3.451  | 0.2606 |
| VQSLQATFGTFESILR                  | 1798.0             | 2            | 5.0197 | 0.5059 |
| VQSSPNLLAAGR                      | 1213.4             | 2            | 2.717  | 0.2098 |
| VQSVEQIREVASGAAR                  | 1700.9             | 2            | 3.2585 | 0.2027 |
| VQTANEVKQAVEQQIQSHR               | 2194.4             | 3            | 3.6681 | 0.2011 |
| VQTEKEEKEEAR                      | 1476.6             | 2            | 3.5382 | 0.3278 |
| VQTERPQPQTLQLDFLMK                | 2173.5             | 3            | 4.3121 | 0.3646 |
| VQTLNQPLLK                        | 1241.5             | 2            | 3.1855 | 0.2003 |
| VQTLNQPLLKSPAPLLHVAALGQK          | 2722.2             | 3            | 3.9723 | 0.2908 |
| VQTRLEETQALLR                     | 1557.8             | 2            | 3.712  | 0.2631 |
| VQTTPPPAVQGQK                     | 1351.5             | 2            | 2.6926 | 0.175  |
| VQTVLGLVEPSKLGGR                  | 1596.9             | 2            | 3.6865 | 0.3581 |
| VQVAEEGKR                         | 1016.1             | 2            | 2.5035 | 0.1276 |
| VQVAEHPR                          | 936.1              | 2            | 2.6732 | 0.2409 |
| VQVALEELQDLK                      | 1385.6             | 2            | 4.4385 | 0.292  |
| VQVALGNISSK                       | 1116.3             | 2            | 2.5961 | 0.1885 |
| VQVEYKGETK                        | 1181.3             | 2            | 3.1334 | 0.2932 |
| VQVLTAGSLMGLGDIISQQLVER           | 2428.8             | 3            | 4.4982 | 0.3454 |
| VQVLTAGSLMGLGDIISQQLVERR          | 2585.0             | 3            | 3.6249 | 0.3096 |
| VQVMVPEAETR                       | 1259.5             | 2            | 2.9144 | 0.1506 |
| VQVPNCDEIFYAGTGNLLLR              | 2223.5             | 3            | 3.6749 | 0.1143 |
| VQVSYKGTK                         | 1125.3             | 2            | 2.6458 | 0.2572 |
| VQVSYKGETK                        | 1139.3             | 2            | 3.132  | 0.3582 |
| VQYTLPDGSTLDVGPARG                | 1790.0             | 2            | 3.0173 | 0.1926 |
| VRAGAVGAHLPASGLDIFGDLK            | 2165.5             | 2            | 2.985  | 0.2475 |



| Peptide Sequence           | Peptide mass (m/z) | Charge State | Xcorr  | DelCn2 |
|----------------------------|--------------------|--------------|--------|--------|
| VRAPMVNPTLGVHEADLLK        | 2061.4             | 3            | 5.1849 | 0.4005 |
| VRDIAIATR                  | 1015.2             | 2            | 2.9772 | 0.1148 |
| VRDIEHLTSLDFFR             | 1749.0             | 2            | 3.5864 | 0.383  |
| VRDIEHLTSLDFFRK            | 1877.1             | 3            | 3.9481 | 0.2872 |
| VRDKLNNLVLFDK              | 1574.8             | 2            | 4.1058 | 0.3391 |
| VRDKLNNLVLFDKATYDK         | 2153.5             | 3            | 5.0239 | 0.29   |
| VRDLFALAR                  | 1061.3             | 2            | 2.958  | 0.1814 |
| VRDLQTQLEELQKK             | 1729.0             | 3            | 5.0724 | 0.2608 |
| VRDQLGQELEELTASLFEEAHK     | 2543.8             | 3            | 5.658  | 0.3879 |
| VRDVFEAK                   | 964.1              | 2            | 2.6112 | 0.1169 |
| VRDVLDLYNVPYIQDR           | 1850.1             | 2            | 2.6646 | 0.17   |
| VREAGQNVTFCKASGTPMPKK      | 2353.8             | 2            | 2.4898 | 0.1253 |
| VREEEIEVDSR                | 1361.4             | 2            | 3.1445 | 0.1963 |
| VREEHQGENLDENLVPVAAAEGRPR  | 2787.0             | 3            | 3.8176 | 0.1837 |
| VREELIDKKTESAVSQMQSVIELGR  | 2847.2             | 3            | 6.0604 | 0.5292 |
| VREEVPLELVEAHVK            | 1748.0             | 3            | 5.0627 | 0.3144 |
| VREEVPLELVEAHVKK           | 1876.2             | 3            | 4.654  | 0.2158 |
| VREEYPDRIMNTFSVVPSPK       | 2365.7             | 2            | 3.8803 | 0.2065 |
| VREFSITDLVPYSITLR          | 2010.3             | 2            | 3.8009 | 0.3208 |
| VREFSITDVVPYPISLR          | 1992.3             | 2            | 5.4136 | 0.3986 |
| VREFVQQLVAPLPLGTGALR       | 2094.5             | 2            | 3.4861 | 0.3573 |
| VREHPLLGPYVEDLSK           | 1853.1             | 3            | 4.335  | 0.389  |
| VREHSVLPYVDGLSK            | 1757.0             | 2            | 4.1895 | 0.3821 |
| VREIQEKLDAFIEALHQEK        | 2297.6             | 3            | 5.363  | 0.436  |
| VREKLIKISKINKGEK           | 1771.1             | 2            | 2.5344 | 0.1071 |
| VRELELVYAR                 | 1248.5             | 2            | 2.7035 | 0.1938 |
| VRELFVQSEIFPLETPAFAIKEQGFR | 3053.5             | 3            | 5.7262 | 0.484  |
| VREMEEEAEKLELQNEVEK        | 2461.7             | 3            | 5.544  | 0.237  |
| VREQLEQELEELTASLFEEAHK     | 2629.9             | 3            | 3.7532 | 0.1013 |
| VREVFGSGTACQVCPVHR         | 1946.2             | 2            | 3.2507 | 0.1937 |
| VREWYGYHFPPELVK            | 1824.1             | 2            | 3.1059 | 0.2075 |
| VRFP SHFSSDLK              | 1420.6             | 2            | 2.8424 | 0.2611 |
| VRFP SHFSSDLKDLLR          | 1918.2             | 3            | 4.7454 | 0.3153 |
| VRGAVASVTFDDFHK            | 1649.8             | 2            | 3.4684 | 0.219  |
| VRGAVASVTFDDFHKNSAR        | 2078.3             | 3            | 4.4714 | 0.2547 |
| VRGEPLQVER                 | 1183.3             | 2            | 2.8338 | 0.2533 |

| Peptide Sequence                  | Peptide mass (m/z) | Charge State | Xcorr  | DelCn2 |
|-----------------------------------|--------------------|--------------|--------|--------|
| VRGPDAAPFLLGLLTNELPLPSPAAAGAPPAAR | 3222.7             | 3            | 6.2436 | 0.4603 |
| VRIDEYDYSKPIQGQQK                 | 2068.3             | 2            | 4.6573 | 0.3628 |
| VRIDQYQGADAVGLEEK                 | 1892.1             | 3            | 4.681  | 0.32   |
| VRIPAEVLILNSIVLPHK                | 2012.5             | 3            | 5.2109 | 0.3098 |
| VRIPAEVLILNSIVLPHKELSR            | 2498.0             | 3            | 6.6473 | 0.3089 |
| VRKDDLVLKLR                       | 1355.7             | 2            | 2.9187 | 0.1391 |
| VRKLELDILPLQEANAELSEK             | 2409.8             | 3            | 3.9879 | 0.1415 |
| URLAEAEETAR                       | 1245.4             | 2            | 3.3605 | 0.2813 |
| VRLADPTGAFGKETDLLLLDDSLVSIFGNR    | 3234.6             | 3            | 5.9652 | 0.5031 |
| VRLADPTGAFGKETDLLLLDDSLVSIFGNRR   | 3390.8             | 3            | 3.4732 | 0.1008 |
| VRLSGDTYEAVVTAVDPVADIATLR         | 2746.1             | 3            | 3.8526 | 0.1417 |
| VRNHYNEMSNLR                      | 1662.8             | 2            | 4.4152 | 0.2681 |
| VRNNYDEEIIISLK                    | 1593.8             | 2            | 4.0101 | 0.211  |
| VRPSEEMLELEKER                    | 1746.0             | 3            | 3.7969 | 0.2108 |
| VRPSSDLNNSTGQSPHHK                | 1962.1             | 3            | 4.1235 | 0.2724 |
| VRQEESEQIK                        | 1246.4             | 2            | 3.6902 | 0.1578 |
| VRQEESEQIKTLNNK                   | 1817.0             | 2            | 4.3737 | 0.2884 |
| VRQEESEQIKTLNNKFASFDKVR           | 2881.2             | 3            | 6.0696 | 0.2784 |
| VRQLVEQVEIQKEQNYQR                | 2416.7             | 3            | 4.437  | 0.1501 |
| VRLETENAGLR                       | 1345.5             | 2            | 3.6974 | 0.3182 |
| VRTDITYPAGFMDVISIDKTGENFR         | 2847.2             | 3            | 3.8539 | 0.2838 |
| VRTELADK                          | 932.1              | 2            | 2.548  | 0.1261 |
| VRTELADKVTK                       | 1260.5             | 3            | 4.104  | 0.2637 |
| VRTELADKVTKLQVELDNVTGLLSQSDSK     | 3188.6             | 3            | 6.5858 | 0.6017 |
| VRVDLPDKYPFK                      | 1477.7             | 2            | 3.1592 | 0.1719 |
| VRVEALQSGGGQER                    | 1486.6             | 2            | 3.7088 | 0.311  |
| VRVEGDNDKKNPR                     | 1527.7             | 2            | 4.4239 | 0.3402 |
| VRVELSNGEK                        | 1131.3             | 2            | 3.2529 | 0.2163 |
| VRVELSNGEKR                       | 1287.5             | 3            | 3.4301 | 0.1065 |
| VRVELSTGMPR                       | 1245.5             | 2            | 2.8195 | 0.1722 |
| VRVPTTGIIYPPFDLENIIFR             | 2493.9             | 2            | 5.5135 | 0.3334 |
| VRVPTTGIIYPPFDLQSVIFR             | 2451.8             | 3            | 5.5492 | 0.3695 |
| VRVSGQGLHEGHTFEPAEFIIDTR          | 2697.0             | 3            | 4.3881 | 0.2918 |
| VRYSLDPENPTK                      | 1419.6             | 2            | 3.6563 | 0.2745 |
| VSAEDLKLSDLLK                     | 1546.7             | 2            | 3.3095 | 0.2079 |
| VSADNTVGR                         | 919.0              | 2            | 2.774  | 0.1281 |

| Peptide Sequence                           | Peptide mass (m/z) | Charge State | Xcorr  | DelCn2 |
|--------------------------------------------|--------------------|--------------|--------|--------|
| VSAEKVNKTHSVNGITEEADPTIYSGK                | 2876.1             | 3            | 3.8515 | 0.2496 |
| VSAFIDWIEETIASH                            | 1718.9             | 2            | 4.3736 | 0.4171 |
| VSAGEAVVNRVFDKLSPLHER                      | 2324.6             | 3            | 5.5858 | 0.4332 |
| VSAKNALESYAFNMK                            | 1673.9             | 2            | 3.7056 | 0.3853 |
| VSALDLAVLDQVEAR                            | 1599.8             | 2            | 4.9107 | 0.4142 |
| VSALGLSKDVYNSEYYHFR                        | 2249.5             | 3            | 4.3191 | 0.3491 |
| VSANKGEIGDATPFNDAVNVQK                     | 2275.5             | 3            | 4.9878 | 0.3274 |
| VSDATGQMNLTK                               | 1265.4             | 2            | 3.9841 | 0.3608 |
| VSDEAVKKDSELDKHLESR                        | 2186.4             | 3            | 3.9101 | 0.3114 |
| VSDIQELELDLIDKVEIDKTVLVTVR                 | 2984.4             | 3            | 3.2865 | 0.1366 |
| VSDIQWFR                                   | 1051.2             | 2            | 3.0729 | 0.1592 |
| VSDKEKIDQLQEELLHTQLK                       | 2395.7             | 3            | 5.2779 | 0.3249 |
| VSDKVMIPQDEYPEINFVGLLIGPR                  | 2831.3             | 3            | 4.6333 | 0.2884 |
| VSDSISAQYPVVDHEFDVAVVVGAGGAGLR             | 2917.2             | 3            | 4.5393 | 0.3427 |
| VSDTVVEPYNATLSIHQLVENTDETYCIDNEALYDICFR    | 4495.9             | 3            | 4.5048 | 0.365  |
| VSDTVVEPYNATLSVHQLVENTDETYCIDNEALYDICFR    | 4481.9             | 3            | 5.8231 | 0.3843 |
| VSDTVVEPYNATLSVHQLVENTDETYCIDNEALYDICFRTLK | 4824.3             | 3            | 4.0251 | 0.2439 |
| VSEADIQR                                   | 918.0              | 2            | 2.9203 | 0.1715 |
| VSEADSSNADWVTK                             | 1509.6             | 2            | 4.4222 | 0.338  |
| VSEAIKLVALLNTLDRWIDETPPVDQPSR              | 3406.8             | 3            | 3.7019 | 0.1368 |
| VSEEAESQQQWDTSKGEQVSQNGLPAEQGSPPR          | 3488.6             | 3            | 5.4274 | 0.342  |
| VSEIQKEIQDLEKTLDFVNIILAR                   | 2945.4             | 3            | 6.1937 | 0.4475 |
| VSEGGPAEIAGLQIGDK                          | 1641.8             | 2            | 4.4637 | 0.4023 |
| VSEGSPGMVSVGPLPK                           | 1541.8             | 2            | 4.0961 | 0.4111 |
| VSEKEKESIAR                                | 1276.4             | 2            | 2.9121 | 0.2172 |
| VSEKVSHVLAALQAGNR                          | 1780.0             | 2            | 3.3812 | 0.2131 |
| VSELFDKTR                                  | 1095.2             | 2            | 2.4996 | 0.1314 |
| VSELHLEVK                                  | 1054.2             | 2            | 3.1212 | 0.2363 |
| VSELKEELK                                  | 1075.2             | 2            | 3.4235 | 0.1694 |
| VSELKEELKK                                 | 1203.4             | 2            | 2.8059 | 0.1748 |
| VSEMQKLDQVKELVLK                           | 1959.3             | 3            | 4.3948 | 0.3086 |
| VSENFEDLLSNQGFSSR                          | 2045.1             | 2            | 4.5631 | 0.4731 |
| VSEQGLIEILK                                | 1229.4             | 2            | 3.2676 | 0.1694 |
| VSEQGLIEILKK                               | 1357.6             | 2            | 3.4634 | 0.1761 |
| VSEQVKNVK                                  | 1031.2             | 2            | 3.1928 | 0.138  |
| VSEVKPSYR                                  | 1065.2             | 2            | 2.8725 | 0.1416 |

| Peptide Sequence               | Peptide mass (m/z) | Charge State | Xcorr  | DelCn2 |
|--------------------------------|--------------------|--------------|--------|--------|
| VSEVKPTYR                      | 1079.2             | 2            | 2.5165 | 0.1153 |
| VSEYVPEIVNFVQK                 | 1651.9             | 2            | 3.3483 | 0.2325 |
| VSFELFADKVPK                   | 1380.6             | 2            | 3.8612 | 0.3972 |
| VSFELFADKVPKTAENFR             | 2099.4             | 2            | 4.953  | 0.4638 |
| VSFQLQSR                       | 965.1              | 2            | 2.5045 | 0.1786 |
| VSFSYAGLSGDDPDLGPAHVVTVIAR     | 2644.9             | 3            | 4.2079 | 0.196  |
| VSFTGSVPTGMK                   | 1211.4             | 2            | 3.4939 | 0.3467 |
| VSGAAPPRPGSSFAHFGFDEQLMHQIR    | 2941.3             | 3            | 6.0762 | 0.4047 |
| VSGAQEMVSSAK                   | 1194.3             | 2            | 3.2045 | 0.3545 |
| VSGAQEMVSSAKDTVATQLSEAVDATR    | 2753.0             | 3            | 5.1906 | 0.2583 |
| VSGELFAQAPVEQYPGIAVETVTDSSR    | 2852.1             | 3            | 3.6482 | 0.1209 |
| VSGGLEVLAEK                    | 1102.3             | 1            | 3.7189 | 0.2841 |
| VSGGTPIKIEDPNQFVPLNTNPNEVLEKR  | 3207.6             | 3            | 4.7419 | 0.4138 |
| VSGHVITDIVEGK                  | 1354.5             | 2            | 2.9693 | 0.2525 |
| VSGHVITDIVEGKK                 | 1482.7             | 2            | 3.5906 | 0.4341 |
| VSGLAGSIYR                     | 1023.2             | 2            | 2.4553 | 0.1184 |
| VSGQGLHEGHTFEPAEFIIDTR         | 2441.6             | 2            | 4.7987 | 0.4851 |
| VSGSELVQK                      | 947.1              | 2            | 3.1261 | 0.2117 |
| VSGSELVQKFIGEGAR               | 1677.9             | 2            | 3.697  | 0.3774 |
| VSGSFPEDSSKER                  | 1425.5             | 2            | 3.1427 | 0.2824 |
| VSGYLNLAADLAHNFTDGLAIGASFR     | 2695.0             | 3            | 4.5353 | 0.4606 |
| VSHITFAHEVGHNFVSPHDSGTECTPGESK | 3166.3             | 3            | 6.1304 | 0.4785 |
| VSHKPSGLVMAR                   | 1282.5             | 3            | 3.4693 | 0.2953 |
| VSHLLGINVTDFTFR                | 1572.8             | 2            | 4.7468 | 0.4548 |
| VSHQAGDHWLIR                   | 1419.6             | 2            | 3.394  | 0.3656 |
| VSHQVAYGLHELLK                 | 1594.8             | 2            | 3.6842 | 0.3068 |
| VSHVLAALQAGNR                  | 1336.5             | 2            | 4.3579 | 0.429  |
| VSHVSTGGGASLELLEK              | 1741.9             | 2            | 5.9911 | 0.555  |
| VSHYIINSSGPRPPVPPSPAQPPPGVSPSR | 3076.5             | 3            | 6.4112 | 0.4113 |
| VSIHSLGHMTPVLSPQNLLSCDTHQQQGCR | 3288.7             | 3            | 4.8548 | 0.2346 |
| VSIKESSVAK                     | 1048.2             | 2            | 2.4755 | 0.1751 |
| VSILESLDKWER                   | 1475.7             | 2            | 3.2969 | 0.3056 |
| VSISEGDDKIEYR                  | 1511.6             | 2            | 3.7223 | 0.4388 |
| VSITEAMHR                      | 1044.2             | 2            | 2.685  | 0.1072 |
| VSKELVEKSEAVR                  | 1474.7             | 2            | 2.8331 | 0.1981 |
| VSKELVEKSEAVRQDEQQR            | 2259.5             | 3            | 3.6095 | 0.1562 |

| Peptide Sequence                     | Peptide mass (m/z) | Charge State | Xcorr  | DelCn2 |
|--------------------------------------|--------------------|--------------|--------|--------|
| VSKELVEKSEAVRQDEQQRK                 | 2387.6             | 3            | 3.327  | 0.1254 |
| VSKNSETFPTILEEAKELVGR                | 2348.6             | 3            | 4.0499 | 0.2252 |
| VSKPTLKEVVIVSATR                     | 1728.1             | 3            | 4.8458 | 0.3084 |
| VSKQEEASGGPTAPK                      | 1486.6             | 2            | 3.6517 | 0.1987 |
| VSKTGAEGAVLDEAKNINK                  | 1945.2             | 3            | 4.271  | 0.3161 |
| VSLANLKPNGPSK                        | 1325.5             | 2            | 2.6072 | 0.1025 |
| VSLAPQANLTELDIYSR                    | 1891.1             | 2            | 3.7833 | 0.4056 |
| VSLDPELEEALTSASDTELCDLAAILGMHNLITNTK | 3830.3             | 3            | 4.0024 | 0.1858 |
| VSLDVNHFAPDELTVK                     | 1785.0             | 2            | 5.113  | 0.4582 |
| VSLDVNHFAPDELTVKTK                   | 2014.3             | 3            | 5.4663 | 0.4716 |
| VSLEPHQGPPTPEK                       | 1563.7             | 2            | 4.1148 | 0.2085 |
| VSLERLDLDTADSQPPVFK                  | 2244.5             | 2            | 4.5744 | 0.4496 |
| VSLFHTPHLR                           | 1207.4             | 2            | 2.8159 | 0.2408 |
| VSLFSLPQYSR                          | 1434.6             | 2            | 3.0594 | 0.3147 |
| VSLQGDLEKEASLLDLKEHASSLASSGLK        | 3227.6             | 3            | 6.128  | 0.447  |
| VSLRDSSLEADHVISAIASVLSSELLPAEAAPLAR  | 3600.1             | 3            | 6.2386 | 0.3877 |
| VSMLAVEEYEEMQVNLELEKDLR              | 2769.1             | 3            | 3.395  | 0.1399 |
| VSNEEVTEELLHVNDLNNVFLR               | 2699.9             | 3            | 5.995  | 0.4538 |
| VSNEEVTEELLHVNDLNNVFLRYER            | 3148.4             | 3            | 4.1401 | 0.2912 |
| VSNAGTMSVSLVADENPFAQGALK             | 2464.7             | 2            | 6.2546 | 0.4558 |
| VSNLEELPLNEYREYIK                    | 2110.4             | 2            | 2.7232 | 0.1655 |
| VSNLQYLHSYLTYYK                      | 1843.1             | 2            | 4.4206 | 0.3839 |
| VSNSGITRVEK                          | 1190.3             | 2            | 3.1754 | 0.1576 |
| VSNTLESR                             | 906.0              | 2            | 2.9871 | 0.2148 |
| VSNTLESRLDLIAQQMMPEVR                | 2431.8             | 2            | 4.0283 | 0.2492 |
| VSNDVHNKR                            | 1069.2             | 2            | 2.9046 | 0.251  |
| VSPDMAIFITMNPYAGR                    | 1941.3             | 2            | 4.7263 | 0.3503 |
| VSPESNEDISTTVVYR                     | 1796.9             | 2            | 4.5338 | 0.5153 |
| VSPETVDSVIMGNVLQSSSDAIYLAR           | 2753.1             | 3            | 5.3211 | 0.5304 |
| VSPNELILGWYATGHDITEHSVLIHEYYSR       | 3501.8             | 3            | 5.069  | 0.4097 |
| VSPSTSYTPSR                          | 1182.3             | 2            | 2.7915 | 0.2335 |
| VSPTGEKVTHTGQVYDDKDYR                | 2396.6             | 3            | 3.5769 | 0.2726 |
| VSQAAADLLAYCEAHVREDPLIIPVASENPFR     | 3594.1             | 3            | 5.8861 | 0.4992 |
| VSQELKEPLHK                          | 1308.5             | 2            | 2.4941 | 0.1345 |
| VSQGKEPVHLLSLFK                      | 1683.0             | 3            | 4.0875 | 0.3497 |
| VSQGQLVVMQPEK                        | 1443.7             | 2            | 4.053  | 0.2342 |

| Peptide Sequence                   | Peptide mass (m/z) | Charge State | Xcorr  | DelCn2 |
|------------------------------------|--------------------|--------------|--------|--------|
| VSQGQLVVMQPEKFQSK                  | 1934.2             | 3            | 3.2982 | 0.165  |
| VSQGSKDPAEGDGAQPEETPR              | 2156.2             | 2            | 6.2879 | 0.431  |
| VSQGSKDPAEGDGAQPEETPRDGDKPEETQGK   | 3341.4             | 3            | 5.6086 | 0.3548 |
| VSQGVEDGPDTK                       | 1232.3             | 2            | 2.8044 | 0.3027 |
| VSQGVEDGPDTKR                      | 1388.5             | 2            | 2.9586 | 0.3202 |
| VSQMAQYFEPLTLAAVGAASK              | 2183.5             | 2            | 5.6295 | 0.5415 |
| VSQPIEGHAASFAQFK                   | 1717.9             | 2            | 4.2543 | 0.4396 |
| VSQQTEKTTTVK                       | 1350.5             | 2            | 2.9369 | 0.2838 |
| VSQSPSKDSEENPATEERPEK              | 2345.4             | 3            | 4.2347 | 0.2474 |
| VSRDTLYEAVR                        | 1309.5             | 2            | 3.0983 | 0.2416 |
| VSRDTLYEAVREVLHGNQR                | 2243.5             | 3            | 3.5315 | 0.1264 |
| VSREDFEWVYTDQPHADR                 | 2251.4             | 3            | 3.7271 | 0.1895 |
| VSRLEEELANLKDESKK                  | 1989.2             | 2            | 2.8463 | 0.1703 |
| VSRLETDELDEEKNTVELLTDR             | 2490.7             | 3            | 5.3827 | 0.3485 |
| VSSAEGAAKEEPK                      | 1303.4             | 2            | 3.5403 | 0.302  |
| VSSAEGAAKEEPKR                     | 1459.6             | 2            | 3.3539 | 0.294  |
| VSSAVKAELR                         | 1060.2             | 2            | 3.2854 | 0.1716 |
| VSSDEDLKLTELLR                     | 1618.8             | 2            | 4.9563 | 0.3656 |
| VSSDNVADLHEK                       | 1314.4             | 2            | 2.7829 | 0.2407 |
| VSSDNVADLHEKYSGSTP                 | 1907.0             | 2            | 4.6552 | 0.4068 |
| VSSDVIDQK                          | 991.1              | 2            | 2.8127 | 0.1432 |
| VSSDVIDQKVYEIQDIYENSWTK            | 2761.0             | 3            | 4.7854 | 0.3058 |
| VSSFEEKMISDAIPELK                  | 1924.2             | 3            | 4.5546 | 0.2983 |
| VSSGVYEPVVIESH                     | 1502.7             | 2            | 3.4096 | 0.3387 |
| VSSGYVPPPVATPFSSK                  | 1720.9             | 2            | 2.9272 | 0.1568 |
| VSSHANAAQER                        | 1170.2             | 2            | 3.3608 | 0.3611 |
| VSSIDLEIDSLSSLLDDMTK               | 2182.4             | 2            | 2.62   | 0.3237 |
| VSSPDYPER                          | 1050.1             | 2            | 2.7077 | 0.2164 |
| VSSQSFSEIER                        | 1269.3             | 2            | 3.0846 | 0.1822 |
| VSSSIQHPETPLHISGFHLPYKPKPPQETEK    | 3510.9             | 3            | 4.5645 | 0.2209 |
| VSSTEGAAKEEPK                      | 1333.4             | 2            | 3.103  | 0.1259 |
| VSTEVDAR                           | 876.9              | 1            | 2.1338 | 0.185  |
| VSTHVIENIYLPAAQTMNSGTFNTTVDIK      | 3166.6             | 3            | 3.5756 | 0.2735 |
| VSTISLPTAPPATGTK                   | 1541.8             | 2            | 3.5873 | 0.3563 |
| VSTLPAITLK                         | 1043.3             | 1            | 1.6275 | 0.138  |
| VSTLQDLLFHSDCVTLHCGLNEHNHHLINDFTVK | 3902.4             | 3            | 4.8494 | 0.3191 |

| Peptide Sequence                       | Peptide mass (m/z) | Charge State | Xcorr  | DelCn2 |
|----------------------------------------|--------------------|--------------|--------|--------|
| VSTTLNVAQAYYAR                         | 1557.7             | 2            | 3.9605 | 0.4123 |
| VSVADHSLHLSK                           | 1293.5             | 2            | 3.8954 | 0.3917 |
| VSAHFGSR                               | 960.1              | 2            | 2.8732 | 0.3552 |
| VVELTNSLFK                             | 1237.4             | 2            | 3.1452 | 0.1312 |
| VSVHVIEGDHR                            | 1248.4             | 2            | 2.7351 | 0.2524 |
| VSVLESMIDDLQWDIDKIR                    | 2276.6             | 2            | 2.7626 | 0.1145 |
| VSVPLIAQGNSYPSETTVK                    | 1991.2             | 2            | 4.5179 | 0.4802 |
| VSVSPVVHVR                             | 1079.3             | 2            | 2.9849 | 0.3039 |
| VSVVANTPSGPVEAFDFDEYQPEMLEK            | 3000.3             | 2            | 4.2672 | 0.4403 |
| VSVVEPGNFIAATSLYSPESIQAIK              | 2693.0             | 3            | 4.9654 | 0.3201 |
| VSWQDLKDFMR                            | 1425.6             | 2            | 2.5629 | 0.3139 |
| VSYALLFGDYLPQNIQAAR                    | 2140.4             | 2            | 4.6494 | 0.2247 |
| VSYARPSSEVIKDANLYISGLPR                | 2536.9             | 3            | 4.8051 | 0.3832 |
| VSYASLADVDKAVAAAK                      | 1679.9             | 2            | 2.5912 | 0.188  |
| VSYASLADVDKAVAAAKDAFENGEGWGR           | 2842.1             | 3            | 4.5763 | 0.3506 |
| VSYFPTVPGVYIVSTK                       | 1758.1             | 2            | 3.7131 | 0.3371 |
| VTADVINA AEKLQVVGR                     | 1784.1             | 2            | 4.0244 | 0.3768 |
| VTAEDKGTGNK                            | 1120.2             | 2            | 3.4537 | 0.2525 |
| VTAEDKGTGNKNK                          | 1362.5             | 2            | 2.6058 | 0.1869 |
| VTAEDKGTGNKNKITITNDQNR                 | 2418.6             | 3            | 4.1636 | 0.244  |
| VTAEVVLAHLGGGSTR                       | 1654.8             | 2            | 4.9694 | 0.5331 |
| VTAIHIDPATHR                           | 1331.5             | 2            | 3.3549 | 0.4    |
| VTANNDKNR                              | 1032.1             | 2            | 3.0054 | 0.2457 |
| VTAPDVDLHLKAPK                         | 1504.8             | 2            | 3.611  | 0.2914 |
| VTAPQPAATNGDLASR                       | 1569.7             | 2            | 3.5703 | 0.3865 |
| VTAQGPGLPSGNIAK                        | 1653.8             | 2            | 4.6535 | 0.5019 |
| VTASDPLDTLGSEGALSPGGVASLLR             | 2484.7             | 2            | 3.5518 | 0.2511 |
| VTASDPLDTLGSEGALSPGGVASLLRLPR          | 2851.2             | 3            | 3.6104 | 0.2704 |
| VTASGFPVILSAPWYLDLISYGQDWR             | 2956.3             | 3            | 4.8957 | 0.4571 |
| VTASGFPVILSAPWYLDLISYGQDWRK            | 3084.5             | 3            | 3.8272 | 0.3019 |
| VTASGPGLSSYGVPASLPVDFDAIDAR            | 2548.8             | 2            | 5.5321 | 0.5143 |
| VTDADAPNTPAWEAVYILNDDGGQFVTTNPVNNDGILK | 4247.6             | 3            | 4.166  | 0.2761 |
| VTDALNATR                              | 961.1              | 2            | 3.7696 | 0.3306 |
| VTDETSGLTCAQFHPDGLIFGTGTMDSQIK         | 3361.7             | 3            | 5.2463 | 0.4191 |
| VTDFGDKVEDPTFLNQLQSGVNR                | 2580.8             | 3            | 5.5536 | 0.4212 |
| VTDHLEALIDPFDLVFTPHLNSNLHR             | 3130.5             | 3            | 6.948  | 0.4331 |

| Peptide Sequence             | Peptide mass (m/z) | Charge State | Xcorr  | DelCn2 |
|------------------------------|--------------------|--------------|--------|--------|
| VTDKLTPIHDR                  | 1295.5             | 2            | 3.997  | 0.323  |
| VTDPVGDIVSFMHSFE EK          | 2038.3             | 2            | 4.8872 | 0.5162 |
| VTDPVGDIVSFMHSFE EK YGR      | 2414.7             | 3            | 3.6214 | 0.2488 |
| VTDRNITLSLVANPSHLEAADPVVMGK  | 2849.3             | 3            | 5.639  | 0.4568 |
| VTDTDFDGV E VR               | 1353.4             | 2            | 3.4763 | 0.2747 |
| VTEDTSSVLR                   | 1107.2             | 2            | 3.0061 | 0.1976 |
| VTEEDFYKLVSEFTITK            | 2050.3             | 2            | 4.6943 | 0.4268 |
| VTEEGTELSQR                  | 1249.3             | 2            | 2.6974 | 0.1523 |
| VTEFGGELHEDGGKLFCTSCNVVLNHVR | 3062.4             | 3            | 5.3756 | 0.3033 |
| VTEGLTDVILYHQPDDKKK          | 2200.5             | 2            | 3.8681 | 0.3374 |
| VTEHGTPK PFR                 | 1269.4             | 2            | 2.5183 | 0.3571 |
| VTELALTASDR                  | 1176.3             | 2            | 2.867  | 0.3344 |
| VTELEQEKQVMQDELDRKEEQVLR     | 2974.3             | 3            | 4.6253 | 0.2893 |
| VTENIPQIISFIEGIIAR           | 2014.4             | 3            | 3.7729 | 0.2704 |
| VTEQLIEAINNGDFEAYTK          | 2156.3             | 2            | 4.5107 | 0.3837 |
| VTETQKNER                    | 1105.2             | 2            | 2.704  | 0.1626 |
| VTFHNGGAYPLSIEPIGVR          | 2099.4             | 2            | 5.0679 | 0.4232 |
| VTFSEDDEIINPEDVDPSVGR        | 2334.4             | 2            | 2.5948 | 0.1154 |
| VTFVNFTVTR                   | 1184.4             | 2            | 3.5426 | 0.3494 |
| VTGADV PMPYAK                | 1249.5             | 2            | 3.785  | 0.2988 |
| VTGDSQPKEQQGDLK              | 1687.8             | 2            | 3.5085 | 0.1806 |
| VTGEADVEFATHEDAVAAMAK        | 2163.4             | 3            | 3.6661 | 0.4242 |
| VTGEADVEFATHEEAVAAMSK        | 2193.4             | 2            | 3.2493 | 0.1363 |
| VTGEVLDILTR                  | 1216.4             | 2            | 2.6857 | 0.2115 |
| VTGEVLDILTRL P ESVER         | 2027.3             | 3            | 4.6492 | 0.3082 |
| VTGSLET KYR                  | 1154.3             | 2            | 2.7887 | 0.3061 |
| VTGTLET K                    | 849.0              | 2            | 2.6512 | 0.1187 |
| VTHALVNIR                    | 1023.2             | 2            | 2.479  | 0.1516 |
| VTHAVVTVPAYFNDAQR            | 1889.1             | 2            | 5.4264 | 0.417  |
| VTHELQAMKDK                  | 1300.5             | 2            | 3.3236 | 0.2238 |
| VTHETSAHEGQTEAPSIDEK         | 2167.2             | 3            | 5.7103 | 0.564  |
| VTHLFDVHSLEQQSEITPK          | 2209.4             | 3            | 5.1223 | 0.4178 |
| VHTTGQVYDDKDYRR              | 1854.0             | 2            | 3.5989 | 0.2903 |
| VTIAQGGVLPNIQAVLLPK          | 1932.3             | 3            | 5.9143 | 0.4303 |
| VTIAQGYDALSSMANIAGYK         | 2074.3             | 2            | 5.3262 | 0.4839 |
| VTIEYYSQLK                   | 1244.4             | 2            | 3.2307 | 0.1538 |



| Peptide Sequence          | Peptide mass (m/z) | Charge State | Xcorr  | DelCn2 |
|---------------------------|--------------------|--------------|--------|--------|
| VTILGHVQR                 | 1023.2             | 2            | 2.8919 | 0.1674 |
| VTIMPKDIQLAR              | 1385.7             | 2            | 3.5955 | 0.2878 |
| VTIPTDLIASSGDIK           | 1643.9             | 2            | 3.2911 | 0.3316 |
| VTKDGVTVAK                | 1018.2             | 2            | 3.5779 | 0.2766 |
| VTKEQWDTIEELIR            | 1761.0             | 2            | 3.7928 | 0.2403 |
| VTKEQWDTIEELIRK           | 1889.1             | 3            | 4.602  | 0.284  |
| VTKLDRDPASGTALQEISFWLNLER | 2861.2             | 3            | 5.655  | 0.3827 |
| VTLAVSDLQK                | 1074.3             | 2            | 3.2434 | 0.2786 |
| VTLDPVQLESSLLR            | 1570.8             | 2            | 2.6888 | 0.116  |
| VTLDWAKPK                 | 1058.3             | 2            | 2.6456 | 0.1801 |
| VTLELGGK                  | 817.0              | 1            | 1.9531 | 0.1424 |
| VTLEYRPVIDK               | 1333.6             | 2            | 3.2461 | 0.1141 |
| VTLLEGDHVR                | 1139.3             | 2            | 3.3705 | 0.2679 |
| VTLLHHVLEEA EK            | 1518.7             | 2            | 3.6207 | 0.2207 |
| VTLLHHVLEEA EKSHPDLLQLPR  | 2676.1             | 3            | 3.7188 | 0.3032 |
| VTLLLFKDVK                | 1176.5             | 2            | 2.6017 | 0.1492 |
| VTLSEGP HHVALFK           | 1535.8             | 2            | 3.9782 | 0.3513 |
| VTLTLPVLNAAR              | 1268.5             | 2            | 3.0449 | 0.2951 |
| VTLTSEEEAR                | 1135.2             | 2            | 3.4703 | 0.3453 |
| VTLTSEEEARLK              | 1376.5             | 2            | 2.9849 | 0.1784 |
| VTLTSEEEARLKK             | 1504.7             | 2            | 3.0554 | 0.1843 |
| VTMDQLSTVHHEM GHIQYYLQYK  | 2823.2             | 3            | 3.5712 | 0.2031 |
| VTMLFLGLHNVR              | 1400.7             | 2            | 3.1839 | 0.3698 |
| VTMWVFEEDIGGK             | 1511.7             | 2            | 3.5024 | 0.2318 |
| VTNDARENEMDENLEQVSGIIGNLR | 2818.0             | 3            | 3.7507 | 0.2254 |
| VTNGAFTGEISPGMIK          | 1622.9             | 2            | 5.1557 | 0.4159 |
| VTNLHLMLQLVR              | 1437.8             | 2            | 4.0782 | 0.3597 |
| VTNLSEDTR                 | 1035.1             | 2            | 2.5874 | 0.1789 |
| VTNSTELQHQLDKTK           | 1742.9             | 2            | 3.4557 | 0.3001 |
| VTNVDEEKQR                | 1218.3             | 2            | 3.0756 | 0.1795 |
| VTNVEWLLDALY GK           | 1621.9             | 2            | 2.5679 | 0.1556 |
| VTPHGLEKVP GIFISR         | 1751.1             | 2            | 2.488  | 0.1058 |
| VTPQSLFILFGVYGDVQR        | 2040.4             | 3            | 4.8978 | 0.4901 |
| VTPTRTEI IILATR           | 1584.9             | 2            | 3.7278 | 0.2174 |
| VTPVDYLLGVADLTGELMR       | 2063.4             | 2            | 5.2356 | 0.5253 |
| VTQDELKEVFEDAAEIR         | 1993.2             | 3            | 5.014  | 0.4118 |

| Peptide Sequence                         | Peptide mass (m/z) | Charge State | Xcorr  | DelCn2 |
|------------------------------------------|--------------------|--------------|--------|--------|
| VTQEEIKKEPEKPIDR                         | 1940.2             | 3            | 4.3278 | 0.2886 |
| VTQEEIKKEPEKPIDREK                       | 2197.5             | 3            | 3.8651 | 0.2063 |
| VTQLASYFEPLILAAVGVASK                    | 2178.6             | 3            | 3.9406 | 0.3244 |
| VTQLDLDGPKELSRR                          | 1727.9             | 2            | 2.4972 | 0.1253 |
| VTQLYMQLLHEIIR                           | 1758.1             | 2            | 3.1757 | 0.2545 |
| VTQSNFAVGYSK                             | 1214.4             | 2            | 2.7947 | 0.2199 |
| VTQSNFAVGYSKDEFQLHTNVNDGTEFGGSIYQK       | 3797.1             | 3            | 5.3884 | 0.3372 |
| VTQVDGHSSK                               | 1058.1             | 2            | 3.1336 | 0.2736 |
| VTQVDGNSPVR                              | 1172.3             | 2            | 3.6858 | 0.2453 |
| VTRVEFEELCADLFR                          | 1957.2             | 3            | 4.2619 | 0.3401 |
| V TSAHKGPDETLR                           | 1411.5             | 2            | 3.5829 | 0.2971 |
| V TSAHLFEVELQAAR                         | 1671.9             | 2            | 2.7323 | 0.3136 |
| V TSAVEALLSADSASR                        | 1577.7             | 2            | 4.9084 | 0.4547 |
| VTSEELHYFVQNHFTSAR                       | 2166.3             | 2            | 5.2743 | 0.4625 |
| VTSEGAGLQLQK                             | 1231.4             | 2            | 4.0435 | 0.3455 |
| V TSIADRLNVDFALIHKER                     | 2198.5             | 3            | 3.3415 | 0.1745 |
| V TSIQDWVQK                              | 1204.4             | 2            | 3.4483 | 0.2748 |
| V TSSEPPNPASSSK                          | 1388.5             | 2            | 2.8891 | 0.1264 |
| V TSVGNTIKPHSVPSHTLPSHPVTPSSK            | 2990.4             | 3            | 4.9517 | 0.365  |
| V TTAATAAATSQDPEQHLTELREPAGTNQR          | 3233.5             | 3            | 5.2314 | 0.355  |
| V TTEIQLPSQSPVEEQSPASLSSLR               | 2684.9             | 3            | 4.3257 | 0.413  |
| V TTEQYQKAAEEVEAK                        | 1825.0             | 2            | 4.4277 | 0.4218 |
| V TTHPLAK                                | 867.0              | 1            | 2.0466 | 0.1006 |
| V TTHPLAKDK                              | 1110.3             | 2            | 2.7914 | 0.3572 |
| V TTMDAELEFAIQPNTTGKQLFDQVVK             | 3025.4             | 3            | 3.513  | 0.2116 |
| V TTQIDKEKK                              | 1190.4             | 2            | 2.9385 | 0.1802 |
| V TTVASHTSDSDVPSGVTEVVVK                 | 2315.5             | 2            | 6.3538 | 0.5024 |
| V TTVASHTSDSDVPSGVTEVVVKLFDSDPITVTPVEVSR | 4171.6             | 3            | 7.3899 | 0.5355 |
| V TTVTEIGKDVIGLR                         | 1601.9             | 2            | 3.4768 | 0.287  |
| V TVAGGVHISGLHTESAPR                     | 1889.1             | 3            | 3.8563 | 0.2774 |
| V TVAGLAGKDPVQCSR                        | 1601.9             | 2            | 4.5714 | 0.39   |
| V TVIKAPHYPGIGPVDESGIPTAIR               | 2589.0             | 3            | 5.5395 | 0.5114 |
| V TVKHLEEIVEK                            | 1424.7             | 2            | 2.7879 | 0.284  |
| V TVLFAAQHIK                             | 1284.5             | 2            | 4.1798 | 0.2292 |
| V TVLFAAQHISK                            | 1300.5             | 3            | 3.9383 | 0.3666 |
| V TVLGHVQR                               | 1009.2             | 2            | 2.8956 | 0.3283 |

| Peptide Sequence                       | Peptide mass (m/z) | Charge State | Xcorr  | DelCn2 |
|----------------------------------------|--------------------|--------------|--------|--------|
| VTVLGVATAPQQVLSNGVPSNFTYSPDTK          | 3091.5             | 3            | 3.5413 | 0.2221 |
| VTVRFPEASGYLHIGHAK                     | 2080.4             | 3            | 4.6638 | 0.3562 |
| VTVTEGGVKQEYR                          | 1466.6             | 2            | 2.8432 | 0.2081 |
| VTVVDVNESR                             | 1118.2             | 2            | 3.6734 | 0.3131 |
| VTYHPDGPEGQAYDVDFTPPFRR                | 2665.9             | 3            | 3.8448 | 0.2911 |
| VTYKAPVPTGEVYFADSFDR                   | 2263.5             | 2            | 4.9286 | 0.4386 |
| VTYKAPVPTGEVYFADSFDRGTLGWSILSK         | 3306.7             | 3            | 3.9482 | 0.1462 |
| VTYLVHNFEEGGGVAMGMYNQDK                | 2560.8             | 2            | 4.4865 | 0.4692 |
| VTYPAK                                 | 678.8              | 1            | 1.9097 | 0.1049 |
| VTYRPLDPDNYDKDLSFIK                    | 2300.6             | 3            | 3.9658 | 0.2304 |
| VTYTPMAPGSYLISIK                       | 1742.1             | 2            | 2.6333 | 0.262  |
| VTYYLDWIHHYVPK                         | 1835.1             | 2            | 3.9075 | 0.3396 |
| VVAEGFDSANGINISPDDKIYVADILAHEIHVLEK    | 3957.4             | 3            | 5.7763 | 0.4281 |
| VVAEKQEKR                              | 1087.3             | 2            | 2.5981 | 0.1274 |
| VVAEPVELAQEFR                          | 1487.7             | 3            | 4.9854 | 0.4588 |
| VVAGVANALAHKYH                         | 1450.7             | 2            | 3.2738 | 0.3519 |
| VVALDKNFHMK                            | 1302.6             | 2            | 3.1004 | 0.1985 |
| VVASGPGLEHGK                           | 1151.3             | 2            | 3.4048 | 0.3486 |
| VVATTQMQAADAR                          | 1362.5             | 2            | 4.4664 | 0.4779 |
| VVDAILGLAHHGNGQLR                      | 1771.0             | 2            | 3.9576 | 0.3232 |
| VVDALGNAIDGK                           | 1172.3             | 2            | 4.2555 | 0.4207 |
| VVDALGNAIDGKGPIGSK                     | 1711.9             | 2            | 4.8533 | 0.5014 |
| VVDFIDEGVNIGLEVK                       | 1747.0             | 2            | 3.425  | 0.2557 |
| VVDHYENPR                              | 1129.2             | 2            | 3.2047 | 0.3563 |
| VVDLLAPYAK                             | 1089.3             | 2            | 3.1039 | 0.2795 |
| VVDLLVIK                               | 899.2              | 2            | 3.3896 | 0.2083 |
| VVDLMAHMASK                            | 1202.5             | 2            | 3.7633 | 0.406  |
| VVDLMAHMASKE                           | 1331.6             | 2            | 4.338  | 0.4263 |
| VVDNPIYLSDMGAALTGAESHELQDVLEETNIPK     | 3671.0             | 3            | 5.349  | 0.4235 |
| VVDNPIYLSDMGAALTGAESHELQDVLEETNIPKR    | 3827.2             | 3            | 4.4017 | 0.3231 |
| VVDNPIYLSDMGAALTGAESHELQDVLEETNIPKRLYK | 4231.7             | 3            | 4.7382 | 0.3614 |
| VVDNTTAKEFADSLGIPFLETSK                | 2554.8             | 2            | 5.5328 | 0.4802 |
| VVDPFSKK                               | 920.1              | 2            | 2.4795 | 0.1418 |
| VVDPFSKKDWYDVKAPAMFNIR                 | 2628.0             | 3            | 4.8748 | 0.311  |
| VVDPIVSNFLQSFETAIEHNKEVEPLLGR          | 3282.7             | 3            | 3.5882 | 0.3645 |
| VVDQQQVER                              | 1101.2             | 2            | 2.4318 | 0.2655 |

| Peptide Sequence                 | Peptide mass (m/z) | Charge State | Xcorr  | DelCn2 |
|----------------------------------|--------------------|--------------|--------|--------|
| VVDRDSEAEIIR                     | 1531.7             | 2            | 3.2901 | 0.148  |
| VVDSLYNK                         | 938.1              | 2            | 3.0515 | 0.1479 |
| VVDTTKESSR                       | 1122.2             | 2            | 2.8828 | 0.2238 |
| VVDVLDSIK                        | 988.2              | 2            | 3.076  | 0.1451 |
| VVDVLDSIKTK                      | 1217.4             | 2            | 2.9433 | 0.3308 |
| VVDYTTAKEFADSLGIPFLETSK          | 2603.9             | 2            | 5.6548 | 0.4948 |
| VVEIAPAAHLDPQLR                  | 1629.9             | 2            | 4.166  | 0.3981 |
| VVEKADSWVEKEEPAPSN               | 2015.2             | 2            | 4.0451 | 0.356  |
| VVEKDNDVLLHWAPVEEAGDSTQILFSK     | 3141.5             | 3            | 4.6491 | 0.3362 |
| VVEKEAETER                       | 1190.3             | 2            | 3.0587 | 0.26   |
| VVELLKDGSGR                      | 1173.3             | 2            | 2.8387 | 0.2449 |
| VVELPKTEEGLGFNIMGGKEQNSPIYISR    | 3207.6             | 3            | 4.7876 | 0.3963 |
| VVESLDVGQDR                      | 1217.3             | 2            | 3.8505 | 0.35   |
| VVEVGSK                          | 717.8              | 1            | 1.7225 | 0.1246 |
| VVEVLAGHGHLYSR                   | 1537.7             | 2            | 4.39   | 0.5041 |
| VVFEQTK                          | 851.0              | 2            | 2.7462 | 0.1595 |
| VVFEQTKVIADNVKDWSK               | 2107.4             | 3            | 4.9007 | 0.4076 |
| VVFGPELVSLGPEEQFTVLSLSAGRPK      | 2858.3             | 2            | 3.892  | 0.4048 |
| VVFQEFR                          | 925.1              | 2            | 2.4413 | 0.1555 |
| VVVFVFGPDKK                      | 1136.4             | 2            | 2.4407 | 0.1135 |
| VVGAMQLYSVDRK                    | 1466.7             | 2            | 3.2989 | 0.3661 |
| VVGAVGSDEKVAYLQK                 | 1663.9             | 2            | 4.5831 | 0.2904 |
| VGAVIDQGLITR                     | 1341.6             | 2            | 3.4977 | 0.235  |
| VGDVAYDEAKER                     | 1451.6             | 2            | 3.4189 | 0.5014 |
| VGGEHVEVHAR                      | 1232.4             | 2            | 3.1209 | 0.229  |
| VGFHVLGPNAGEVTQGFAAALK           | 2283.6             | 2            | 5.2827 | 0.4846 |
| VGKEQGQNLAR                      | 1299.5             | 2            | 3.4678 | 0.2229 |
| VGNPFDSKTEQGPQVDETQFK            | 2451.6             | 3            | 4.1672 | 0.1741 |
| VGPPQLHSETNER                    | 1594.7             | 2            | 3.0199 | 0.3983 |
| VGRPQPQLQYVDALGYVSLFPLLLR        | 2943.5             | 3            | 3.6661 | 0.1811 |
| VGSEFVQKYLGEQPR                  | 1766.0             | 2            | 3.6033 | 0.446  |
| VGSELIQKYLGDGPKLVR               | 2072.4             | 3            | 3.3275 | 0.3042 |
| VGVFTVPDKDGKADPLALAAEKDGTVPFKLPK | 3425.0             | 3            | 4.3324 | 0.2031 |
| VGVKSEGEVAR                      | 1230.4             | 2            | 3.1889 | 0.3437 |
| VGVLLGSWQK                       | 1186.4             | 2            | 2.9083 | 0.2443 |
| VVHASGDASYSAGDSGDAAAQPAFTGIK     | 2651.8             | 3            | 3.7603 | 0.2603 |

| Peptide Sequence                         | Peptide mass (m/z) | Charge State | Xcorr  | DelCn2 |
|------------------------------------------|--------------------|--------------|--------|--------|
| VVHGEDAVPYSWPWQVSLQYEK                   | 2618.9             | 3            | 3.7929 | 0.2266 |
| VVHIMDFQR                                | 1145.4             | 2            | 2.7556 | 0.3686 |
| VVHLLNDQHLGVVTAATSLITLAQK                | 2744.2             | 3            | 4.9327 | 0.4216 |
| VVHLLNDQHLGVVTAATSLITLAQKNPEEFK          | 3489.0             | 3            | 5.2657 | 0.478  |
| VVHLSQEINHLQK                            | 1545.8             | 3            | 3.8584 | 0.3401 |
| VVHQDVAFTDPTLDSTEINVPQDILGIWVDPIDSTYQYIK | 4548.0             | 3            | 3.4865 | 0.1581 |
| VVHVNGYGK                                | 973.1              | 1            | 2.423  | 0.2426 |
| VVIGMDVAASEFFR                           | 1541.8             | 2            | 3.465  | 0.4263 |
| VVIHFTDGADGDLADLHR                       | 1952.1             | 3            | 6.0721 | 0.408  |
| VVIIGAGKPAAVVLQTK                        | 1665.1             | 2            | 4.4313 | 0.4525 |
| VVINVPFIKDKNTPSPFIETFTEDDEASR            | 3310.7             | 3            | 3.3917 | 0.2565 |
| VVKEEEAIALAEK                            | 1429.6             | 2            | 2.8993 | 0.1545 |
| VVKELEDLQK                               | 1201.4             | 2            | 3.4435 | 0.1181 |
| VVKLENGEIETIAR                           | 1571.8             | 2            | 4.0969 | 0.3794 |
| VVKQASEGPLK                              | 1156.4             | 1            | 3.2437 | 0.172  |
| VVLAEVIQAFSAPENAVR                       | 1914.2             | 2            | 4.2699 | 0.4936 |
| VVLASASPR                                | 900.1              | 2            | 2.9565 | 0.24   |
| VVLAYEPVWAIGTGK                          | 1603.9             | 3            | 4.9454 | 0.4859 |
| VVLAYEPVWAIGTGKTATPQQAQEVHEK             | 3052.4             | 3            | 3.8131 | 0.3455 |
| VVLAYEPVWAIGTGKTATPQQAQEVHEKLR           | 3321.8             | 3            | 4.9241 | 0.4298 |
| VVLAYEPVWAIGTGKTATPQQDQEVHDK             | 3082.4             | 3            | 3.2828 | 0.1292 |
| VVLDDKDYFLFR                             | 1530.7             | 2            | 3.8549 | 0.4433 |
| VVLDDKDYFLFRDGDILGK                      | 2229.5             | 2            | 4.2411 | 0.2639 |
| VVLDDKDYFLFRDGDILGKYVD                   | 2606.9             | 3            | 4.1165 | 0.3914 |
| VVLEAPDETTLKELAETLQQK                    | 2356.7             | 3            | 3.236  | 0.1089 |
| VVLEHEEVR                                | 1110.2             | 2            | 2.4005 | 0.1848 |
| VVLELKADVVPK                             | 1310.6             | 2            | 3.7549 | 0.2153 |
| VVLFEMEAR                                | 1094.3             | 2            | 2.9768 | 0.2664 |
| VVLHDGDPNRPVSDYINANIIMPEFETK             | 3158.5             | 3            | 4.8603 | 0.3455 |
| VVLIGDSGVGK                              | 1044.2             | 1            | 3.0292 | 0.1742 |
| VVLIGDSGVGKSNLLSR                        | 1715.0             | 2            | 4.3323 | 0.5217 |
| VVLLEDLASQVGLR                           | 1512.8             | 2            | 4.0764 | 0.3373 |
| VVLPPIEAPIR                              | 1107.4             | 2            | 2.494  | 0.2302 |
| VVLQQDPQQAR                              | 1282.4             | 2            | 3.6245 | 0.2951 |
| VVLRGVGGSQPPDIDKTELVEPTEYLVVHLK          | 3389.9             | 3            | 5.3274 | 0.4853 |
| VVLSQVQVEKGDTEQEIQR                      | 2274.5             | 3            | 5.3812 | 0.4242 |

| Peptide Sequence                   | Peptide mass (m/z) | Charge State | Xcorr  | DelCn2 |
|------------------------------------|--------------------|--------------|--------|--------|
| VVLSSQDKDK                         | 1119.3             | 2            | 2.5618 | 0.204  |
| VVLTAGPAQFGLDSLK                   | 1616.9             | 2            | 2.9274 | 0.2526 |
| VVLTQANK                           | 873.0              | 1            | 1.7784 | 0.1338 |
| VVLTQANKLGV                        | 1142.4             | 2            | 3.4353 | 0.3344 |
| VVLVLAGR                           | 827.1              | 2            | 2.4666 | 0.141  |
| VVLVNNILQNAQER                     | 1610.8             | 2            | 4.5634 | 0.4353 |
| VVLVTGAGAGLGR                      | 1170.4             | 2            | 4.4113 | 0.4541 |
| VVLWGSYSLQEVPEDFGPVR               | 2750.1             | 3            | 4.3742 | 0.2501 |
| VVNEINIEDLCLTK                     | 1603.9             | 2            | 2.7525 | 0.3311 |
| VVNFIKGSSLNSR                      | 1421.6             | 2            | 2.7597 | 0.1274 |
| VVNGAAASQPPSKR                     | 1382.6             | 2            | 3.1189 | 0.1092 |
| VVNGPEILNK                         | 1083.3             | 2            | 2.8014 | 0.1774 |
| VVNISMLGRMANPARSPYCITKFGVE         | 2942.5             | 3            | 5.0295 | 0.2462 |
| VVNLHPLKK                          | 1048.3             | 2            | 2.6085 | 0.3063 |
| VVNPTQK                            | 785.9              | 1            | 1.6759 | 0.1084 |
| VVNVSIMSVR                         | 1191.4             | 2            | 4.5133 | 0.369  |
| VVPENLGLQEGTHELCYNTACALIGQGQLNQAMK | 3645.1             | 3            | 5.4845 | 0.4568 |
| VVPLADIITPNQFEAELLSGR              | 2283.6             | 2            | 4.6334 | 0.4251 |
| VVPLVQMGETDANVAK                   | 1671.9             | 2            | 3.0123 | 0.3281 |
| VVPSDLYPLVLGFLR                    | 1689.0             | 3            | 3.9371 | 0.3932 |
| VVPTKEGQLLAEQLGFDFFEASAK           | 2626.0             | 3            | 4.5365 | 0.3375 |
| VVPTTDHIDTEKLLK                    | 1596.8             | 2            | 3.4302 | 0.3321 |
| VVQGKEPAHLMSLFGGK                  | 1799.1             | 2            | 4.5689 | 0.4318 |
| VVQGKEPAHLMSLFGGKPMIYK             | 2545.1             | 3            | 5.5631 | 0.4481 |
| VVQHSNVVINLIGR                     | 1548.8             | 2            | 3.7662 | 0.4354 |
| VVQHSNVVINLIGRDWETK                | 2208.5             | 3            | 3.9378 | 0.3479 |
| VVQLDVR                            | 829.0              | 2            | 2.675  | 0.1373 |
| VVQVSAGDSHTAALTDDGR                | 1900.0             | 2            | 4.1251 | 0.354  |
| VVQVVKPHTPLIR                      | 1486.8             | 2            | 3.4284 | 0.3414 |
| VVRPDSELGERPPEDNQSFQYDHEAFLGK      | 3361.6             | 3            | 3.9763 | 0.3042 |
| VVRPDSELGERPPEDNQSFQYDHEAFLGKEDSK  | 3821.0             | 3            | 3.6546 | 0.2685 |
| VVRVPADLGAEAGLQQLLGALR             | 2247.6             | 2            | 5.103  | 0.4491 |
| VVSAAVQAQHSATK                     | 1397.6             | 2            | 3.841  | 0.3652 |
| VVSEDFLQDVSASTK                    | 1625.8             | 2            | 5.0808 | 0.4769 |
| VVSETNDTK                          | 993.1              | 1            | 3.2001 | 0.3361 |
| VVSETNDTKVLRRH                     | 1498.7             | 2            | 4.0728 | 0.3326 |

| Peptide Sequence                       | Peptide mass (m/z) | Charge State | Xcorr  | DelCn2 |
|----------------------------------------|--------------------|--------------|--------|--------|
| VVSKEESIVSSLR                          | 1433.6             | 2            | 3.2756 | 0.3441 |
| VVSPVLILDLSGDDDDLEAQEDVTLEHLPESVLQDVIR | 4186.7             | 3            | 5.0618 | 0.3899 |
| VVSQYHELVVQAR                          | 1528.7             | 2            | 4.3584 | 0.3459 |
| VVSQYSSLLSPMSVNAVVMK                   | 2041.4             | 2            | 5.6517 | 0.4324 |
| VVSSIEQK                               | 890.0              | 1            | 2.2454 | 0.112  |
| VVSSIEQKTEGAEK                         | 1505.7             | 2            | 4.0452 | 0.3033 |
| VVSSIEQKTEGAEEK                        | 1633.8             | 2            | 4.4963 | 0.2208 |
| VVSSIVDKYIGESAR                        | 1710.9             | 2            | 4.3193 | 0.501  |
| VVSYRVPHNAAVQVYDYR                     | 2137.4             | 3            | 4.4733 | 0.4381 |
| VVTDDETALAR                            | 1349.4             | 2            | 3.8713 | 0.4514 |
| VVTEKSPTDWALFTYEGNSNDIR                | 2643.8             | 3            | 5.1946 | 0.3814 |
| VVTNYNSAHDQNSNLLIEYFR                  | 2498.7             | 3            | 4.5674 | 0.4108 |
| VVTTNYKPVANHQYNIeyer                   | 2439.7             | 3            | 3.331  | 0.2255 |
| VVTYGMANLLTGPK                         | 1464.8             | 2            | 3.7028 | 0.4055 |
| VVVAENFDEIVNNENK                       | 1834.0             | 2            | 5.3201 | 0.4455 |
| VVDALSGLK                              | 1001.2             | 2            | 3.8066 | 0.3127 |
| VVDALSGLKGDLAGR                        | 1570.8             | 2            | 4.12   | 0.4649 |
| VVHKETEITPEDGED                        | 1797.9             | 2            | 3.2    | 0.2945 |
| VVHKETELAEEGED                         | 1684.8             | 2            | 4.571  | 0.4747 |
| VVHPLVLLSVVDHFNR                       | 1944.3             | 3            | 5.1931 | 0.4809 |
| VVKAPDEETLIALLAHAK                     | 2018.4             | 3            | 5.9129 | 0.2859 |
| VVLGLLPR                               | 966.2              | 2            | 3.9111 | 0.2173 |
| VVQVLAAEPEAVLK                         | 1623.9             | 2            | 4.0454 | 0.3942 |
| VVSHSTHR                               | 1022.1             | 2            | 2.4304 | 0.1227 |
| VVTMEHSAK                              | 1101.3             | 2            | 2.5351 | 0.1297 |
| VVTVEQTEEELER                          | 1660.8             | 2            | 3.3456 | 0.1934 |
| VVVGDQSAGK                             | 1059.2             | 2            | 3.0273 | 0.3086 |
| VVVGDQSAGKTSVLEMIAQAR                  | 2259.6             | 3            | 5.2742 | 0.324  |
| VVVVTGANTGIGKETAK                      | 1644.9             | 2            | 4.2492 | 0.452  |
| VVYENAYGQFIGPHR                        | 1750.9             | 2            | 3.5382 | 0.1803 |
| VVYGGGAAEISCALAVSQEADKCPTLEQYAMR       | 3332.8             | 3            | 3.8093 | 0.3232 |
| VVYIFGPPVKEPPTDVTPTFLTGGVLSTLR         | 3246.8             | 3            | 6.0793 | 0.4267 |
| VWAHYEEQPVEEVMPVLEEK                   | 2442.7             | 3            | 4.2934 | 0.1859 |
| VWAHYEEQPVEEVMPVLEEKER                 | 2728.0             | 3            | 5.5841 | 0.3713 |
| VWDAVSGDELMTLAHK                       | 1773.0             | 2            | 5.4242 | 0.3542 |
| VWDDGIIDPADTR                          | 1473.6             | 2            | 4.2209 | 0.3472 |

| Peptide Sequence                         | Peptide mass (m/z) | Charge State | Xcorr  | DelCn2 |
|------------------------------------------|--------------------|--------------|--------|--------|
| VWDLFPEADKVR                             | 1475.7             | 2            | 2.9901 | 0.2745 |
| VWGAPRNSDPALGLDDDPDAPAAQLAR              | 2790.0             | 3            | 4.3707 | 0.1587 |
| VWGVPIPVFHKK                             | 1416.7             | 2            | 2.8934 | 0.2189 |
| VWITNGGLANIFTVFAK                        | 1852.2             | 2            | 4.3716 | 0.1562 |
| VWLDPNETNEIANANSR                        | 1944.1             | 2            | 5.6643 | 0.5315 |
| VWQVTIGTR                                | 1060.2             | 2            | 3.1335 | 0.1755 |
| VWSRNEDITEPQSILAAAEK                     | 2258.5             | 2            | 5.4629 | 0.3642 |
| VWSRNEDITEPQSILAAAEKAGMSAEQAQGLLEK       | 3673.1             | 3            | 6.0121 | 0.5018 |
| VWYVSNIDGTHIAK                           | 1603.8             | 2            | 4.0983 | 0.4326 |
| VWYVSNIDGTHIAKTLAQLNPESLFIASK            | 3417.9             | 3            | 4.4998 | 0.2346 |
| VYAALGNHDFHPK                            | 1469.6             | 2            | 3.4706 | 0.3179 |
| VYADGIFDLFHSGHAR                         | 1806.0             | 2            | 4.2699 | 0.5068 |
| VYAEADSQESADHLAHEVSLAVFQLAGGIGERPQPG     | 3751.0             | 3            | 4.8627 | 0.3785 |
| VYAEADSQESADHLAHEVSLAVFQLAGGIGERPQPGF    | 3898.2             | 3            | 4.8715 | 0.4223 |
| VYAEDPYKSFGLPSIGR                        | 1900.1             | 2            | 2.939  | 0.3126 |
| VYAILTHGIFSGPAISR                        | 1803.1             | 2            | 4.6928 | 0.4566 |
| VYALPEDLVEVKPK                           | 1600.9             | 2            | 2.4724 | 0.1354 |
| VYANGQHLLFDFHR                           | 1675.8             | 2            | 4.5047 | 0.5668 |
| VYAPASTLVDQPYANEGTVVTER                  | 2580.8             | 3            | 5.8429 | 0.5041 |
| VYEFDKLDVVR                              | 1496.7             | 2            | 3.5169 | 0.3883 |
| VYEGERPLTK                               | 1192.3             | 2            | 2.9512 | 0.3323 |
| VYEGERPLTKDNHLLGTFDLTGIPPAPR             | 3108.5             | 3            | 5.3035 | 0.4345 |
| VYENVGLMQQQK                             | 1437.6             | 2            | 4.1752 | 0.3176 |
| VYEVATFYTMYNR                            | 1657.9             | 2            | 3.7275 | 0.4903 |
| VYFKDTHPK                                | 1135.3             | 2            | 2.8658 | 0.2681 |
| VYFQSPPGAAGEGPGGADDEGPVR                 | 2331.4             | 3            | 4.2018 | 0.3593 |
| VYGDIIHTPAKDR                            | 1485.7             | 2            | 2.7712 | 0.1542 |
| VYGSFLVNPESGYNVSLLYDLENLPASKDSIVHQAGMLKR | 4427.0             | 3            | 3.7581 | 0.2178 |
| VYIASSSGSTAIK                            | 1284.4             | 2            | 4.2274 | 0.3804 |
| VYIASSSGSTAIKK                           | 1412.6             | 2            | 2.7847 | 0.2674 |
| VYIGEEEEKIFLEK                           | 1726.0             | 2            | 2.6929 | 0.2447 |
| VYINLDKETK                               | 1223.4             | 2            | 2.8575 | 0.1523 |
| VYINYDMNAANVGWNNSTFA                     | 2428.6             | 2            | 4.4665 | 0.4654 |
| VYISLLPLGDGLTLAFK                        | 1821.2             | 2            | 2.869  | 0.2961 |
| VYISSPHSSPAHNK                           | 1524.7             | 2            | 3.1638 | 0.235  |
| VYKEMYK                                  | 961.2              | 1            | 2.1237 | 0.1214 |



| Peptide Sequence                     | Peptide mass (m/z) | Charge State | Xcorr  | DelCn2 |
|--------------------------------------|--------------------|--------------|--------|--------|
| VYKEMYKTDLEKDIISDTSGDFR              | 2755.1             | 3            | 5.1099 | 0.431  |
| VYKEMYKTDLEKDIISDTSGDFRK             | 2883.2             | 3            | 6.1864 | 0.4354 |
| VYLLYRPGHYDILYK                      | 1914.2             | 2            | 3.4418 | 0.1918 |
| VYMGHGGKPVVSDFSHPHYLAGR              | 2599.9             | 3            | 5.0664 | 0.4495 |
| VYNIEFNPPK                           | 1221.4             | 2            | 3.0854 | 0.2303 |
| VYNIEFNPPKTVGIDDLTGEPLIQR            | 2830.2             | 3            | 3.5339 | 0.234  |
| VYNIEFNPPKTVGIDDLTGEPLIQREDDKPETVIKR | 4141.6             | 3            | 3.9503 | 0.2981 |
| VYNVTQHAVGIVVVK                      | 1641.9             | 2            | 5.2534 | 0.3868 |
| VYNVTQHAVGIVVVKQVK                   | 1997.3             | 3            | 5.1431 | 0.4926 |
| VYNYNHLMPTR                          | 1408.6             | 2            | 3.8968 | 0.3404 |
| VYNYVDWIKDTIAANS                     | 1873.1             | 1            | 3.666  | 0.3659 |
| VYNYVK                               | 785.9              | 1            | 1.8639 | 0.102  |
| VYQNHVQHLISEK                        | 1595.8             | 2            | 4.2338 | 0.3114 |
| VYQWDDPDPR                           | 1291.4             | 2            | 3.2683 | 0.384  |
| VYSEVHFTLAKPPSVVNR                   | 2044.3             | 3            | 4.3877 | 0.3575 |
| VYSLFLDESR                           | 1229.4             | 2            | 3.1024 | 0.311  |
| VYSPHVLNLTLDLPGITK                   | 2094.5             | 3            | 4.9795 | 0.3377 |
| VYSRGDSEPLSEAAQAHR                   | 2075.2             | 3            | 4.6013 | 0.4211 |
| VYSTSVTGSR                           | 1057.1             | 2            | 3.1072 | 0.3491 |
| VYTDVQQVASSLTHPR                     | 1802.0             | 3            | 3.3294 | 0.2568 |
| VYVAESLISSAGEGLFSK                   | 1858.1             | 2            | 2.6416 | 0.2427 |
| VYVGNLGNNGNK                         | 1249.4             | 2            | 3.4865 | 0.267  |
| VYVGNLGNNGNKTELER                    | 1878.0             | 2            | 4.3821 | 0.3817 |
| VYVGNLGTGAGK                         | 1136.3             | 2            | 3.3107 | 0.3027 |
| VYVGNLGTGAGKGELER                    | 1720.9             | 2            | 4.1494 | 0.4293 |
| VYVPALIFGQLLTSSNYDDDEKKVTGGR         | 3087.4             | 3            | 3.3699 | 0.1231 |
| VYVPTGFSAFPFELLHTPEK                 | 2280.6             | 2            | 4.3654 | 0.3389 |
| VYVYLQHPAGIEPTPTLTLTGHDDEFGR         | 3013.4             | 3            | 5.1555 | 0.3459 |
| VYYFNHITNASQWER                      | 1929.1             | 2            | 4.3496 | 0.4053 |
| VYYTAGYNPDK                          | 1362.5             | 2            | 2.873  | 0.3215 |
| VYYVDHVEKR                           | 1308.5             | 2            | 3.2745 | 0.3333 |
| WAAPVETLENIATVDTR                    | 2000.2             | 2            | 3.4702 | 0.3059 |
| WAAVVVPSGEEQR                        | 1428.6             | 2            | 3.792  | 0.2728 |
| WAEAGGHSR                            | 957.0              | 2            | 2.6441 | 0.2073 |
| WAEELLPLLQCCQVVR                     | 1797.2             | 2            | 4.2952 | 0.2587 |
| WAEYHADIYDK                          | 1411.5             | 2            | 3.6962 | 0.3445 |

| Peptide Sequence                          | Peptide mass (m/z) | Charge State | Xcorr  | DelCn2 |
|-------------------------------------------|--------------------|--------------|--------|--------|
| WAEYHADIYDKVSGDMQK                        | 2157.3             | 3            | 4.9058 | 0.547  |
| WAHLDIAGVMTNKDEVPLYR                      | 2329.7             | 2            | 5.1958 | 0.4626 |
| WAIAQLNYADMLK                             | 1537.8             | 2            | 4.3487 | 0.2512 |
| WAIAQLNYADMLKR                            | 1694.0             | 3            | 3.706  | 0.2354 |
| WALQAYQGQLLQEGATRLLR                      | 2316.6             | 3            | 5.5758 | 0.1196 |
| WALSQSNPSALR                              | 1330.5             | 2            | 4.054  | 0.3468 |
| WALSQSNPSALRETVVEVPQVTWEDIGGLEDVKR        | 3811.2             | 3            | 7.5224 | 0.5097 |
| WARPPISMNFEVPPFAPSGLK                     | 2245.6             | 3            | 4.6431 | 0.3236 |
| WATHGEPSPVNSHPQR                          | 1800.9             | 2            | 5.3896 | 0.3758 |
| WDAWNALGSLPK                              | 1358.5             | 2            | 4.119  | 0.2555 |
| WDDPYDIAR                                 | 1314.4             | 2            | 2.9325 | 0.1749 |
| WDKNSLTLEAVKR                             | 1560.8             | 2            | 4.9386 | 0.3523 |
| WDNNYGDGVSPMSWIGSVDILR                    | 2482.7             | 2            | 4.5566 | 0.4875 |
| WDPDKAGDKPHMQTYEVDLNK                     | 2488.7             | 3            | 4.8782 | 0.3359 |
| WDQSTFIGR                                 | 1110.2             | 2            | 2.7579 | 0.3205 |
| WDQSTFLGR                                 | 1110.2             | 2            | 2.4726 | 0.2899 |
| WDQTADQTPGATPK                            | 1516.6             | 2            | 4.7683 | 0.4347 |
| WDTGENPIYK                                | 1223.3             | 2            | 2.615  | 0.2358 |
| WDYEKNEWKK                                | 1426.6             | 2            | 2.9943 | 0.2213 |
| WDYPEGTPNGGSTTLPSAPPPASAGLK               | 2669.9             | 3            | 4.6201 | 0.2857 |
| WEAAEGLLQEALDKDSGYPETLVNLIVLSQHLGKPPEVTNR | 4533.1             | 3            | 5.1793 | 0.4524 |
| WEFKHPQPFLR                               | 1485.7             | 2            | 3.0709 | 0.3433 |
| WENPLMGWASTADPLSNMVLTFSTK                 | 2798.2             | 2            | 3.4886 | 0.3813 |
| WEQQADYMGADSFNKR                          | 2232.4             | 2            | 4.7121 | 0.3685 |
| WESERVLSFIPPDGNFRLISYRVSSQNLVAIPVYVK      | 4181.8             | 3            | 3.237  | 0.1309 |
| WEVADLQPQLKIDK                            | 1683.9             | 2            | 4.0333 | 0.3105 |
| WFHPNITGVEAENLLLTR                        | 2111.4             | 2            | 3.7839 | 0.3828 |
| WFNGQPIHAELSPVDFR                         | 2115.3             | 2            | 3.4837 | 0.2273 |
| WFQQKYDGIILPGK                            | 1694.0             | 2            | 3.7274 | 0.361  |
| WFVLKPNIIISYYVSEDLKDK                     | 2458.8             | 3            | 4.3611 | 0.3722 |
| WFVLKPNIIISYYVSEDLKDKK                    | 2587.0             | 3            | 3.3911 | 0.2189 |
| WGASTATTQK                                | 1051.1             | 2            | 2.5528 | 0.2502 |
| WGDAGAEYVVESTGVFTTMEK                     | 2278.5             | 2            | 6.5843 | 0.4621 |
| WGDEHIPGSPYR                              | 1414.5             | 2            | 3.2355 | 0.134  |
| WGDIFFPPFGR                               | 1418.6             | 2            | 2.8116 | 0.1115 |
| WGDSVLLVDLTHEEMPQSIVEATSR                 | 2814.1             | 3            | 3.6286 | 0.1061 |

| Peptide Sequence                   | Peptide mass (m/z) | Charge State | Xcorr  | DelCn2 |
|------------------------------------|--------------------|--------------|--------|--------|
| WGFGLEELYGLALR                     | 1624.9             | 2            | 2.8774 | 0.1775 |
| WGFTKFNADEFEDMVAEK                 | 2165.4             | 2            | 2.7412 | 0.1877 |
| WGFTKFNADEFEDMVAEKR                | 2321.6             | 3            | 4.1156 | 0.245  |
| WGLQDIDTIIDHASVGIMTLSPFDQMK        | 3033.5             | 3            | 3.6687 | 0.3451 |
| WGNHAADPIIR                        | 1448.6             | 2            | 3.3328 | 0.2537 |
| WGSQAFHNMR                         | 1234.4             | 2            | 3.0211 | 0.1462 |
| WGTDEAQFIYILGNR                    | 1784.0             | 2            | 4.5503 | 0.3915 |
| WGTDEEKFITIFGTR                    | 1801.0             | 2            | 4.7074 | 0.4211 |
| WGYSSTAIR                          | 1142.2             | 2            | 2.7373 | 0.3007 |
| WHEMLDKAPVLK                       | 1580.9             | 2            | 4.2183 | 0.4428 |
| WHFYDTVK                           | 1096.2             | 2            | 2.4405 | 0.2398 |
| WHLGVGPEGAFPPHQQGFHR               | 2240.5             | 2            | 5.2061 | 0.5232 |
| WHNLPAHQGAVQDQPYQLPVEIDPLIASNTGMHR | 3835.3             | 3            | 4.0675 | 0.2302 |
| WHQTADFGYVNPVK                     | 1660.8             | 2            | 4.2581 | 0.2889 |
| WHWSSGSLVSYK                       | 1437.6             | 3            | 4.3942 | 0.3652 |
| WIAQDLSSLAGLLDQHGVR                | 2080.3             | 2            | 4.2771 | 0.3594 |
| WIFKQDFSPEVLK                      | 1637.9             | 2            | 3.4591 | 0.2411 |
| WIGLDLSNGKPR                       | 1356.6             | 2            | 2.9936 | 0.2753 |
| WIHPASGR                           | 924.0              | 1            | 1.7574 | 0.1682 |
| WIKNTIAANS                         | 1118.3             | 2            | 2.7986 | 0.1822 |
| WISIMTER                           | 1036.2             | 2            | 3.2021 | 0.1393 |
| WITAKEDDLNSFNATDLKDLSSHQLNEFLAQLQR | 4064.4             | 3            | 7.5926 | 0.5535 |
| WKAANDAGYFNDEMAPIEVK               | 2270.5             | 2            | 5.3769 | 0.3886 |
| WKAGLYGLPR                         | 1161.4             | 2            | 2.8557 | 0.2964 |
| WKDEDISQK                          | 1149.2             | 2            | 2.7087 | 0.1887 |
| WKDSDEADLVLAK                      | 1490.6             | 3            | 4.8389 | 0.3454 |
| WKDTDEADLVLAK                      | 1504.7             | 3            | 3.723  | 0.1526 |
| WKEATIPGHLNSYTIK                   | 1859.1             | 2            | 3.6481 | 0.293  |
| WKELVDGAPLWLLK                     | 1669.0             | 2            | 4.0458 | 0.1654 |
| WKHPFFLDDR                         | 1361.5             | 2            | 2.4049 | 0.1942 |
| WKNFSPVDAAFR                       | 1535.7             | 2            | 2.7121 | 0.2361 |
| WKPADLKEVTEEDLNNHFK                | 2314.5             | 2            | 3.6637 | 0.1826 |
| WKPPMIDNPSYQGIWKPR                 | 2214.6             | 2            | 3.1983 | 0.3708 |
| WKRPTLLSNPQFIVDGATR                | 2329.6             | 3            | 6.1426 | 0.4192 |
| WKYEKPDGSPVFIAR                    | 1941.2             | 2            | 4.5211 | 0.3411 |
| WLAIANAR                           | 1030.2             | 2            | 2.9441 | 0.1628 |

| Peptide Sequence                     | Peptide mass (m/z) | Charge State | Xcorr  | DelCn2 |
|--------------------------------------|--------------------|--------------|--------|--------|
| WLAVDYENVRPDIVLLGK                   | 2101.4             | 2            | 4.1122 | 0.3764 |
| WLDLKDNLDPVLAK                       | 1738.0             | 3            | 4.3689 | 0.3055 |
| WLSDARNPPVVSK                        | 1584.8             | 2            | 3.9587 | 0.3375 |
| WLHNEDQMAVEK                         | 1500.7             | 2            | 4.1932 | 0.4632 |
| WLHNEDQMAVEKLSDGIR                   | 2142.4             | 3            | 5.0703 | 0.3604 |
| WLHSMTDDPPTTKPLTAR                   | 2068.3             | 2            | 4.5703 | 0.2709 |
| WLKDQELSPR                           | 1272.4             | 2            | 2.6891 | 0.2087 |
| WLKEDKLECSEELGDLVK                   | 2135.4             | 2            | 5.858  | 0.4347 |
| WLLAAAGVEFEEK                        | 1463.7             | 2            | 4.6634 | 0.3447 |
| WLLLTGISAQQNR                        | 1500.7             | 2            | 4.3707 | 0.3572 |
| WLPAGDALLQMITIHLPSVTAQK              | 2602.1             | 2            | 4.5531 | 0.3889 |
| WLPLEANPEVTNQFLK                     | 1900.2             | 2            | 3.7886 | 0.3873 |
| WLPVQESSTDDKKPGER                    | 1973.1             | 2            | 3.9763 | 0.3122 |
| WLQDLQEENESLKAHVQEVAQHNLK            | 2988.3             | 3            | 4.5197 | 0.217  |
| WLSAAEEK                             | 934.0              | 2            | 2.4529 | 0.1575 |
| WLSAEIEDVKPAK                        | 1486.7             | 2            | 3.7768 | 0.3562 |
| WLVEPQIDDPNSNLEEAINAEAITSVNSLGSK     | 3584.8             | 3            | 4.3033 | 0.3346 |
| WLVIDPVPAAVPTQVAGPK                  | 1959.3             | 2            | 3.9599 | 0.2415 |
| WLVQVPR                              | 898.1              | 2            | 2.5363 | 0.113  |
| WLWEPTAPEKGKE                        | 1571.8             | 2            | 2.9298 | 0.1923 |
| WMEEQAQSLIDKTTAAFQQGK                | 2411.7             | 3            | 4.6086 | 0.2248 |
| WMGPIPPAVNAR                         | 1309.6             | 2            | 2.4153 | 0.1314 |
| WNDGLDQYRLTPLELK                     | 1962.2             | 2            | 3.834  | 0.2525 |
| WNLDELPKFEK                          | 1419.6             | 2            | 3.3652 | 0.1533 |
| WNNTPMDEALHFGHHDVFK                  | 2296.5             | 2            | 4.372  | 0.4736 |
| WNTDNTLGTEISWENKLAEGLKLTLDTIFVPNTGKK | 4049.5             | 3            | 4.2838 | 0.3185 |
| WNTDNTLGTEITVEDQLAR                  | 2177.3             | 2            | 5.18   | 0.3734 |
| WNTDSVEEFLSEK                        | 1584.7             | 2            | 3.0617 | 0.3899 |
| WNTDSVEEFLSEKLERI                    | 2096.3             | 2            | 2.5126 | 0.2783 |
| WNTEDKVSHVSTGGGASLELLEGGK            | 2515.7             | 3            | 5.9327 | 0.5236 |
| WNTEDKVSHVSTGGGASLELLEGGKVLPGVDALSNI | 3595.0             | 3            | 3.7749 | 0.3389 |
| WPDFNQEAYVGGTMVR                     | 1871.1             | 2            | 2.7387 | 0.1225 |
| WPDLHKNELK                           | 1280.5             | 2            | 2.6698 | 0.1965 |
| WPDLHSHHELK                          | 1399.5             | 2            | 2.9155 | 0.1377 |
| WPTETDVSSAK                          | 1221.3             | 2            | 2.615  | 0.2829 |
| WPTSGQLFLGHPK                        | 1468.7             | 2            | 2.4281 | 0.1589 |

| Peptide Sequence                      | Peptide mass (m/z) | Charge State | Xcorr  | DelCn2 |
|---------------------------------------|--------------------|--------------|--------|--------|
| WQEVIPYTPAMQR                         | 1619.9             | 2            | 2.6847 | 0.1424 |
| WQFSMSAIKEEQELMEEINEDEPVKAK           | 3240.6             | 3            | 3.2741 | 0.1913 |
| WQKEQESIQQQLQTSLHDR                   | 2368.6             | 3            | 4.577  | 0.2586 |
| WQQQGDLQDTK                           | 1347.4             | 2            | 3.305  | 0.2861 |
| WQQQGDLQDTKENR                        | 1746.8             | 2            | 4.9073 | 0.4047 |
| WQQQGDLQDTKENREEAR                    | 2232.3             | 2            | 4.0365 | 0.198  |
| WQSLKDLVK                             | 1117.3             | 2            | 2.6082 | 0.1336 |
| WQTLLSVDDLVEK                         | 1546.7             | 2            | 4.2173 | 0.4049 |
| WQTLLSVDDLVEKLVK                      | 1887.2             | 2            | 3.92   | 0.322  |
| WREEQMER                              | 1164.3             | 2            | 2.5507 | 0.1108 |
| WREEQMERLEALDANSR                     | 2134.3             | 2            | 3.75   | 0.2291 |
| WREHSAFQAPAVK                         | 1527.7             | 3            | 4.1077 | 0.3048 |
| WRPIASDEIVPGDIVSISR                   | 2081.4             | 3            | 3.3806 | 0.1127 |
| WRYPSLSLHGIEGAFSGSGAK                 | 2221.5             | 3            | 5.1257 | 0.4677 |
| WSDQGPAQTSR                           | 1233.3             | 2            | 3.286  | 0.343  |
| WSGLLVTVGEVLEK                        | 1530.8             | 2            | 4.4741 | 0.3628 |
| WSGPLSLQEVEQPQHPLHVYAGAAVDELGK        | 3473.8             | 3            | 6.4738 | 0.5392 |
| WSGPLSLQEVEQPQHPLHVYAGAAVDELGKVLTPQVK | 4340.8             | 3            | 6.559  | 0.4749 |
| WSKMDQLAK                             | 1107.3             | 2            | 2.7566 | 0.2197 |
| WSNAGELMELIR                          | 1419.6             | 2            | 2.6025 | 0.1059 |
| WSPIASTLPELVQR                        | 1597.8             | 2            | 3.5072 | 0.2491 |
| WSRPQAPITGYR                          | 1432.6             | 2            | 2.7009 | 0.2831 |
| WSTDDVQINDISLQDYIAVK                  | 2324.5             | 2            | 5.6339 | 0.4822 |
| WSTDDVQINDISLQDYIAVKEK                | 2581.8             | 3            | 4.897  | 0.3984 |
| WSTLVEDYGMELR                         | 1599.8             | 2            | 2.6144 | 0.1561 |
| WTAISALEYGVVPTLIGEAVFAR               | 2464.8             | 2            | 4.474  | 0.4084 |
| WDENIDTVALK                           | 1405.5             | 2            | 3.3728 | 0.2081 |
| WDENIDTVALKHFPNIDREK                  | 2542.8             | 3            | 3.9927 | 0.299  |
| WTEYGLTFTEK                           | 1375.5             | 2            | 2.6458 | 0.2949 |
| WTGMIIGPPR                            | 1128.4             | 2            | 3.0758 | 0.3748 |
| WTLLQEQQ                              | 1046.2             | 2            | 3.348  | 0.1517 |
| WTPIIKDIMEDTIEDKLDTK                  | 2405.7             | 2            | 3.5217 | 0.396  |
| WTQLGAFYPFMR                          | 1517.8             | 2            | 3.9929 | 0.3135 |
| WTTAPKPTMADELYNQDYPIHSVEDR            | 3079.3             | 3            | 6.1534 | 0.4975 |
| WTTAPKPTMADELYNQDYPIHSVEDRHK          | 3344.7             | 3            | 4.4423 | 0.2897 |
| WTTEQQQR                              | 1077.1             | 2            | 2.4604 | 0.1613 |

| Peptide Sequence              | Peptide mass (m/z) | Charge State | Xcorr  | DelCn2 |
|-------------------------------|--------------------|--------------|--------|--------|
| WTTSQLLQHPFVTVDSNKPIR         | 2468.8             | 3            | 3.6148 | 0.1252 |
| WVAIQSVSAWPEK                 | 1501.7             | 2            | 4.4401 | 0.3867 |
| WVDINDKLK                     | 1131.3             | 2            | 2.7347 | 0.1371 |
| WVGADHADDIQYVFGKPFATPTGYRPQDR | 3309.6             | 3            | 5.3659 | 0.4606 |
| WVGGPEIELIAIATGGR             | 1740.0             | 2            | 4.5154 | 0.3912 |
| WVPEITHHCPK                   | 1347.6             | 2            | 2.4622 | 0.3246 |
| WVPPLIGELYGLR                 | 1513.8             | 3            | 4.2712 | 0.3389 |
| WVTYFNKPDIDAWELR              | 2054.3             | 2            | 4.9632 | 0.4663 |
| WVTYFNKPDIDAWELRK             | 2182.5             | 3            | 4.9005 | 0.4598 |
| WVIGDENYGEQSSR                | 1668.7             | 2            | 3.791  | 0.3982 |
| WVIGDENYGEQSSREHAALPR         | 2572.7             | 3            | 3.9623 | 0.2815 |
| WYDLMDNKDKGSS                 | 1559.7             | 2            | 3.3181 | 0.23   |
| WYFDVTEGK                     | 1145.2             | 2            | 2.5542 | 0.1939 |
| WYQMGAYQPFFR                  | 1594.8             | 2            | 4.0238 | 0.3711 |
| WYVNLHSLMDR                   | 1434.6             | 2            | 2.8921 | 0.2773 |
| WYVVGLAGNAILR                 | 1432.7             | 2            | 4.1669 | 0.2429 |
| WYVVQTNDR                     | 1344.5             | 2            | 2.98   | 0.1938 |
| YAAELHLVHWNTK                 | 1582.8             | 2            | 3.8334 | 0.3479 |
| YAALLKDPTQALNEQGDSRNNSSVEDQK  | 3093.3             | 3            | 3.9231 | 0.1128 |
| YAALSDQGLDIK                  | 1294.4             | 2            | 2.5398 | 0.2529 |
| YAALSVDGEDENEGEDYAE           | 2077.0             | 2            | 4.1192 | 0.4491 |
| YAAVHVHTNAAR                  | 1310.4             | 2            | 3.594  | 0.3588 |
| YAAVTQFEATDAR                 | 1443.5             | 2            | 3.1653 | 0.3175 |
| YADALQEIIQER                  | 1449.6             | 2            | 4.0956 | 0.2605 |
| YADDTFTPFAFVSTVGIDFK          | 2095.3             | 2            | 4.225  | 0.4498 |
| YADEEIPR                      | 993.1              | 2            | 2.7153 | 0.2386 |
| YADEEIPRSPFK                  | 1452.6             | 2            | 3.0058 | 0.1804 |
| YADEMKEIQER                   | 1412.6             | 2            | 3.6019 | 0.31   |
| YADKLIAEGTVTLQEFEEEEIAKYDR    | 2933.2             | 3            | 3.946  | 0.1942 |
| YADLLEKETLK                   | 1436.7             | 2            | 4.2208 | 0.3276 |
| YADLPGIAR                     | 976.1              | 2            | 2.8393 | 0.3004 |
| YADLSHNR                      | 976.0              | 2            | 2.952  | 0.3444 |
| YADLTEDQLPSCESLKDTIAR         | 2369.6             | 3            | 5.1585 | 0.3558 |
| YAEAVTR                       | 809.9              | 1            | 2.5205 | 0.1807 |
| YAEDIFGELFTQANTFASR           | 2181.3             | 2            | 6.3027 | 0.4781 |
| YAEERDRAEAER                  | 1566.6             | 2            | 3.1928 | 0.1993 |

| Peptide Sequence                  | Peptide mass (m/z) | Charge State | Xcorr  | DelCn2 |
|-----------------------------------|--------------------|--------------|--------|--------|
| YAEIVHLTLPDGTK                    | 1557.8             | 2            | 3.9296 | 0.415  |
| YAEIVHLTLPDGTKR                   | 1714.0             | 3            | 4.733  | 0.3431 |
| YAEKLIQEGK                        | 1179.3             | 2            | 3.2094 | 0.2985 |
| YAEELLEHRNSQK                     | 1617.7             | 2            | 3.5653 | 0.2924 |
| YAEELLSQGVVNPPEYEEEISKYDK         | 2932.2             | 3            | 4.2543 | 0.1964 |
| YAETLFDILVAGGMLAPGGTLADMMR        | 2830.3             | 2            | 3.0087 | 0.2132 |
| YAFGQETNVPLNNSADQVTR              | 2372.5             | 2            | 5.9046 | 0.4803 |
| YAGEPVPFIEPPESFEFYAQLRK           | 2844.2             | 3            | 4.0769 | 0.1991 |
| YAGGTNDKGIGMGMTVPISFAVFPNEDGSLQKK | 3431.9             | 3            | 3.7557 | 0.1868 |
| YAGKDGNYNTLSK                     | 1480.6             | 2            | 4.2337 | 0.3083 |
| YAGPEDDAAITLAFSK                  | 1669.8             | 2            | 3.8867 | 0.406  |
| YAGSALQYEDVSTAVQNLQK              | 2186.4             | 2            | 5.7453 | 0.5229 |
| YAHQSGFHVDR                       | 1317.4             | 2            | 3.2337 | 0.3378 |
| YAHVVLR                           | 858.0              | 2            | 2.5376 | 0.1588 |
| YAIAVNDLGTEYVHR                   | 1721.9             | 2            | 3.9658 | 0.3518 |
| YAICSAALASALPALVMSK               | 1881.3             | 2            | 3.0439 | 0.2275 |
| YAIGSLNEGR                        | 1080.2             | 2            | 2.8604 | 0.1937 |
| YAKDALNLAQMGEQTLQLEQQSK           | 2680.0             | 3            | 4.5992 | 0.2756 |
| YAKENPEKR                         | 1135.3             | 2            | 2.794  | 0.1092 |
| YALPLVGHR                         | 1026.2             | 2            | 2.9249 | 0.2961 |
| YALQMEQLNGILLHLESELAQTR           | 2672.1             | 2            | 6.7187 | 0.4861 |
| YALQMEQLNGILLHLESELAQTRAEGQR      | 3213.6             | 3            | 4.6494 | 0.3257 |
| YALSVGYR                          | 929.1              | 2            | 2.8813 | 0.3201 |
| YALTGDEVKK                        | 1124.3             | 2            | 2.5716 | 0.2368 |
| YALYDASFETK                       | 1308.4             | 2            | 3.3147 | 0.3571 |
| YALYDASFETKESR                    | 1680.8             | 2            | 3.783  | 0.3259 |
| YALYDATYETK                       | 1338.4             | 2            | 4.4003 | 0.4134 |
| YALYDATYETKESK                    | 1682.8             | 2            | 3.945  | 0.3735 |
| YANEVNSDAGAFKNSLKDLPDVQELITQVR    | 3336.7             | 3            | 5.3604 | 0.3826 |
| YAPLHLVPLIER                      | 1421.7             | 2            | 3.4783 | 0.3558 |
| YAPSEAGLHEMDIR                    | 1589.8             | 2            | 3.0716 | 0.3033 |
| YAPSGFYIASGDVSGK                  | 1619.8             | 2            | 5.1867 | 0.4854 |
| YAPSGFYIASGDVSGKLR                | 1889.1             | 2            | 4.4439 | 0.4436 |
| YAPTEAQLNAVDALIDSMMLAK            | 2322.6             | 2            | 6.211  | 0.5201 |
| YAPTEVGLHEMHIK                    | 1625.9             | 2            | 3.9957 | 0.4505 |
| YASFQVENDQER                      | 1486.5             | 2            | 3.7352 | 0.3351 |

| Peptide Sequence             | Peptide mass (m/z) | Charge State | Xcorr  | DelCn2 |
|------------------------------|--------------------|--------------|--------|--------|
| YASICQQNGIVPIVEPEILPDGDHDLKR | 3121.5             | 3            | 6.8661 | 0.4616 |
| YASNAVSEALIR                 | 1294.4             | 2            | 4.2478 | 0.4066 |
| YATALYSAASK                  | 1146.3             | 2            | 3.5413 | 0.3853 |
| YATALYSAASKQNKLEQVEKELLR     | 2755.1             | 3            | 4.0515 | 0.3664 |
| YAVDDVQYVDEIASVLTSQKPSVLLTLR | 3124.5             | 3            | 4.8374 | 0.3707 |
| YAVLYQPLFDKR                 | 1513.8             | 2            | 3.2186 | 0.3494 |
| YAVTTGDHGIIR                 | 1303.4             | 2            | 2.8929 | 0.1416 |
| YDAFLASESLIK                 | 1357.5             | 2            | 3.4001 | 0.2687 |
| YDAVKEEK                     | 982.1              | 2            | 2.6795 | 0.1822 |
| YDDIEGANYFQQANELSK           | 2106.2             | 2            | 3.3683 | 0.135  |
| YDDIKKVVK                    | 1108.3             | 2            | 2.8829 | 0.2472 |
| YDDLKKVVK                    | 1108.3             | 2            | 2.6302 | 0.1882 |
| YDDMAAAMK                    | 1016.2             | 1            | 3.2539 | 0.3655 |
| YDDMASAMK                    | 1032.2             | 1            | 2.1535 | 0.358  |
| YDDPEVQKDIK                  | 1350.5             | 2            | 2.4079 | 0.142  |
| YDDYSSSR                     | 993.0              | 2            | 2.6564 | 0.2887 |
| YDEIVKEVSAYIK                | 1557.8             | 2            | 3.2486 | 0.1618 |
| YDEIVKEVSAYIKK               | 1685.9             | 3            | 4.2742 | 0.2601 |
| YDEMVESMK                    | 1132.3             | 2            | 3.2313 | 0.1804 |
| YDEMVESMCK                   | 1260.5             | 2            | 3.3758 | 0.3179 |
| YDEYVNVKDFSDKINR             | 2006.2             | 3            | 3.8515 | 0.3953 |
| YDGEDLAYTVK                  | 1274.4             | 2            | 2.7173 | 0.3204 |
| YDGIILPGK                    | 976.2              | 2            | 3.1405 | 0.163  |
| YDGKWEVEEMKESK               | 1758.9             | 3            | 4.2852 | 0.3097 |
| YDGWFNNLR                    | 1185.3             | 2            | 2.7827 | 0.3066 |
| YDKSLHQAIEGDTSGDFLK          | 2125.3             | 3            | 3.8696 | 0.2664 |
| YDLSGRPLNIKEDPDGENAR         | 2260.4             | 3            | 4.1719 | 0.353  |
| YDNHVGTSK                    | 1021.1             | 2            | 3.0078 | 0.194  |
| YDNSLKIISNASCTTNCLAPLAK      | 2441.8             | 3            | 3.2892 | 0.1417 |
| YDPSLKPLSVSYDQATSLR          | 2141.4             | 3            | 4.5175 | 0.4282 |
| YDSPINSASHIPSSK              | 1603.7             | 2            | 3.4807 | 0.2891 |
| YDVQHLQTALR                  | 1344.5             | 2            | 3.0229 | 0.3028 |
| YDYEEVEAEGANK                | 1517.5             | 2            | 4.7704 | 0.3787 |
| YDYQRQPDSSGSIIR              | 1785.9             | 2            | 3.4457 | 0.3238 |
| YEAAGTLVTLSSAPTAIK           | 1794.0             | 2            | 3.2318 | 0.2991 |
| YEAPQATDGLAGALDAR            | 1719.8             | 2            | 4.8849 | 0.438  |



| Peptide Sequence             | Peptide mass (m/z) | Charge State | Xcorr  | DelCn2 |
|------------------------------|--------------------|--------------|--------|--------|
| YEDFKEEGSENAVK               | 1645.7             | 2            | 4.074  | 0.3053 |
| YEDFSNLGTTLLR                | 1666.8             | 2            | 3.7161 | 0.397  |
| YEDKDGKQPVGR                 | 1392.5             | 2            | 3.7225 | 0.3706 |
| YEEENFYLEPYLK                | 1737.9             | 2            | 4.2661 | 0.3539 |
| YEEENFYLEPYLKEVIR            | 2235.5             | 3            | 3.6532 | 0.2254 |
| YEEIDNAPEER                  | 1365.4             | 2            | 3.2208 | 0.2932 |
| YEEIVKEVSTYIK                | 1601.8             | 2            | 4.3697 | 0.3747 |
| YEEIVKEVSTYIKK               | 1730.0             | 3            | 4.7709 | 0.4512 |
| YEELQSLAGKHGDDLRR            | 1988.2             | 3            | 3.8172 | 0.359  |
| YEEVSVSGFEEFHR               | 1715.8             | 2            | 2.7417 | 0.2521 |
| YEGFFGLYR                    | 1152.3             | 2            | 3.0511 | 0.3382 |
| YEGGYPALTEVMNK               | 1572.8             | 2            | 4.0136 | 0.3305 |
| YEHANDDKSSLK                 | 1407.5             | 2            | 2.7874 | 0.2462 |
| YHLLQLLLDLAQEK               | 1714.0             | 2            | 3.9685 | 0.2958 |
| YHLLQLLLDLAQEKVDVANRLEK      | 2739.1             | 3            | 3.631  | 0.1479 |
| YEIDLDTSDHAHLEHITR           | 2166.3             | 3            | 3.5739 | 0.373  |
| YEIETETVTK                   | 1342.4             | 2            | 3.2122 | 0.2198 |
| YEIKDIHVPPR                  | 1367.6             | 3            | 3.4018 | 0.256  |
| YEILTPNSIPK                  | 1275.5             | 2            | 3.2395 | 0.2379 |
| YEKDIAAYR                    | 1129.2             | 2            | 3.196  | 0.2372 |
| YEKEKFEEMIQQIK               | 1844.1             | 3            | 4.5899 | 0.3272 |
| YEKPDGSPVFIAFR               | 1626.8             | 2            | 2.519  | 0.2528 |
| YELGRPAANTK                  | 1220.4             | 2            | 3.1901 | 0.3578 |
| YEMFAQTLQQSR                 | 1502.7             | 2            | 4.2737 | 0.3973 |
| YEMLKEHER                    | 1235.4             | 2            | 2.6532 | 0.1884 |
| YENHSATAESSR                 | 1352.3             | 2            | 2.7412 | 0.3073 |
| YEQGFITDPVVLSPK              | 1693.9             | 2            | 2.5618 | 0.1238 |
| YESGDHVAVYPANDSALVNQLGK      | 2448.6             | 3            | 4.9552 | 0.3517 |
| YESLTDPSKLD SGK              | 1540.7             | 2            | 4.5396 | 0.3592 |
| YESLTDPSKLD SGKELHINLIPNK    | 2713.0             | 3            | 4.7469 | 0.3702 |
| YESLTDPSKLD SGKELHINLIPNKQDR | 3112.4             | 3            | 5.8327 | 0.4116 |
| YESLTDPSKLD SGKELK           | 1911.1             | 2            | 4.1252 | 0.4443 |
| YESLTDPSKLD SGKELKIDIIPNPQER | 3087.4             | 3            | 5.9953 | 0.4431 |
| YESSALPSGQLTSLSEYASR         | 2147.3             | 2            | 6.2998 | 0.4819 |
| YESSSYTDQFSR                 | 1470.5             | 2            | 3.4138 | 0.3856 |
| YESSTASALVA                  | 1099.2             | 2            | 2.6332 | 0.2097 |

| Peptide Sequence                      | Peptide mass (m/z) | Charge State | Xcorr  | DelCn2 |
|---------------------------------------|--------------------|--------------|--------|--------|
| YETELAMR                              | 1013.2             | 2            | 2.7219 | 0.2714 |
| YETTNKTYK                             | 1148.2             | 2            | 2.7484 | 0.3061 |
| YEVLK TENPGDASDLQGR                   | 1993.1             | 2            | 5.5135 | 0.4996 |
| YEVPLETPHVHSR                         | 1564.7             | 2            | 3.6313 | 0.4409 |
| YEVTSGGGGTSR                          | 1171.2             | 2            | 2.6838 | 0.2819 |
| YEW DVAEAR                            | 1139.2             | 2            | 3.1718 | 0.3727 |
| YEYVLHPR                              | 1077.2             | 2            | 2.6932 | 0.2549 |
| YFAGN LASGGAAGATSLCFVYPLDFAR          | 2741.1             | 2            | 5.0913 | 0.4942 |
| YFAGTMAEETAPAVLER                     | 1857.1             | 2            | 5.3023 | 0.4668 |
| YFANKETDKQILQNR                       | 1869.1             | 3            | 3.4793 | 0.2606 |
| YFDENAAEDFEKHESVEYKPPKPFVK            | 3273.6             | 3            | 5.157  | 0.3413 |
| YFDGSGGNNHAVEHYR                      | 1823.9             | 2            | 4.1545 | 0.4505 |
| YFDGSGGNNHAVEHYRETGYPLAVK             | 2783.0             | 3            | 4.4381 | 0.4217 |
| YFDKASYR                              | 1050.1             | 2            | 2.6839 | 0.2274 |
| YFDLGLPNRDQTDDQVTIDSALATQK            | 2926.1             | 3            | 6.1265 | 0.4385 |
| YFDLGLPNRDQTDDQVTIDSALATQKYSVAVK      | 3573.9             | 3            | 5.4054 | 0.3511 |
| YFDMWGGDVAPFIEFLK                     | 2036.3             | 2            | 4.2327 | 0.2401 |
| YFDPANGK                              | 912.0              | 1            | 2.1752 | 0.2796 |
| YFDRVDENNPEYLR                        | 1830.9             | 2            | 2.7929 | 0.1205 |
| YFDRVDENNPEYLRER                      | 2116.2             | 2            | 3.0138 | 0.227  |
| YFDSGDYNMAK                           | 1311.4             | 2            | 3.2078 | 0.3717 |
| YFEITDESPYVHYLNTFSSKEPQR              | 2952.2             | 3            | 4.079  | 0.3467 |
| YFETSALKEEATK                         | 1517.7             | 2            | 4.4327 | 0.432  |
| YFGELLADLSR                           | 1284.4             | 2            | 3.3401 | 0.3005 |
| YFGELLADLSRK                          | 1412.6             | 2            | 3.0577 | 0.2544 |
| YFHTSVSRPGR                           | 1307.4             | 2            | 2.4296 | 0.3134 |
| YFHVVIAGPQDSPFEGGTFK                  | 2197.4             | 2            | 4.7047 | 0.4183 |
| YFILPDSLPLDTLLVDVEPK                  | 2288.7             | 3            | 5.5301 | 0.5448 |
| YFILPDSLPLDTLLVDVEPKVK                | 2516.0             | 2            | 3.4934 | 0.3574 |
| YFKDHVEKDDIIK                         | 1650.9             | 2            | 2.8267 | 0.2197 |
| YFKLEPLQAYHR                          | 1565.8             | 3            | 4.5927 | 0.3217 |
| YFLAELLSEPNQTENDALEPEDLSQAAEQDE       | 3510.6             | 3            | 5.5876 | 0.5069 |
| YFLAELLSEPNQTENDALEPEDLSQAAEQDEM R    | 3798.0             | 3            | 4.6221 | 0.4294 |
| YFLAELLSEPNQTENDALEPEDLSQAAEQDEM RL   | 3911.2             | 3            | 5.3618 | 0.5287 |
| YFLAELLSEPNQTENDALEPEDLSQAAEQDEM RLE  | 4040.3             | 3            | 5.1109 | 0.4765 |
| YFLAELLSEPNQTENDALEPEDLSQAAEQDEM RLEL | 4153.4             | 3            | 4.8776 | 0.4574 |

| Peptide Sequence                        | Peptide mass (m/z) | Charge State | Xcorr  | DelCn2 |
|-----------------------------------------|--------------------|--------------|--------|--------|
| YFLAELLSEPNQTENDALEPEDLSQAAEQDEMRLLELQ  | 4281.6             | 3            | 6.0209 | 0.4781 |
| YFLAELLSEPNQTENDALEPEDLSQAAEQDEMRLLELQR | 4437.8             | 3            | 5.0903 | 0.3672 |
| YFLDNLDKLGEPDYIPSQQDILLAR               | 2938.3             | 3            | 4.7583 | 0.2737 |
| YFLHQSHEER                              | 1346.4             | 2            | 3.0307 | 0.3028 |
| YFLHQSHEEREHAEK                         | 1941.1             | 2            | 4.3136 | 0.4023 |
| YFLHQSHEEREHAEKLMK                      | 2313.6             | 3            | 4.0916 | 0.3343 |
| YFLKPEVLQK                              | 1265.5             | 2            | 2.9382 | 0.2837 |
| YFNVHELEALLQEMSSK                       | 2039.3             | 2            | 5.4142 | 0.4541 |
| YFPAFEK                                 | 902.0              | 1            | 2.1477 | 0.2552 |
| YFPGFDWFFLDIPITSSGIK                    | 2238.5             | 2            | 3.2515 | 0.3503 |
| YFPTQALNFAFK                            | 1447.7             | 2            | 3.9632 | 0.4214 |
| YFPTQALNFAFKDK                          | 1690.9             | 2            | 3.1507 | 0.2833 |
| YFQFQEEGKEGENR                          | 1761.8             | 2            | 4.7671 | 0.324  |
| YFQHLLGK                                | 1006.2             | 2            | 2.5427 | 0.1212 |
| YFQNYSYGGVIQDDHIPFLR                    | 2433.7             | 3            | 3.6773 | 0.2911 |
| YFQNYSYGGVIQDDHIPFLRR                   | 2589.8             | 3            | 4.1395 | 0.397  |
| YFSEADKIK                               | 1101.2             | 2            | 2.4476 | 0.1713 |
| YFSERGDVTK                              | 1273.4             | 2            | 2.873  | 0.1357 |
| YFSLKPEEKDEK                            | 1513.7             | 2            | 3.4094 | 0.2781 |
| YFTTTK                                  | 760.9              | 1            | 1.6726 | 0.1533 |
| YFTWDPSRFPQPR                           | 1697.9             | 2            | 2.7174 | 0.1143 |
| YFVEAGAMAVR                             | 1214.4             | 2            | 2.4473 | 0.1347 |
| YFVQGMGYMPSASMTR                        | 1827.1             | 2            | 5.0298 | 0.5455 |
| YFYVSAEQVVQGMK                          | 1649.9             | 2            | 3.4663 | 0.3438 |
| YGAATANYMEVVSLK                         | 1731.0             | 2            | 4.505  | 0.4993 |
| YGADVHTQSK                              | 1106.2             | 2            | 3.0168 | 0.2643 |
| YGAFGLPITVAHVVDGQTHMLFGSDR              | 2691.0             | 3            | 4.2569 | 0.3761 |
| YGAFVKPAVVTVGDFPEEDYGLDEI               | 2732.0             | 2            | 5.0558 | 0.406  |
| YGAHNYHPLPVALER                         | 1737.9             | 2            | 4.3123 | 0.4649 |
| YGASLLHTYAGPSLLVLGPR                    | 2086.4             | 2            | 3.5037 | 0.3696 |
| YGASQVEDMGNIILAMISEPYNHR                | 2710.0             | 3            | 4.0362 | 0.2413 |
| YGDFNKEVHK                              | 1237.3             | 2            | 2.9663 | 0.2652 |
| YGDGGSTFQSTTGHCVHMR                     | 2042.2             | 3            | 3.5347 | 0.2294 |
| YGDGIQLTR                               | 1023.1             | 2            | 2.8415 | 0.2575 |
| YGDLANWMIPGK                            | 1365.6             | 2            | 3.2053 | 0.1575 |
| YGDLLGHLK                               | 1016.2             | 2            | 3.128  | 0.2195 |

| Peptide Sequence                  | Peptide mass (m/z) | Charge State | Xcorr  | DelCn2 |
|-----------------------------------|--------------------|--------------|--------|--------|
| YGDLLPADGILIQGNDLKIDESSLTGESDHVKK | 3542.9             | 3            | 5.0447 | 0.4241 |
| YGDSGEQIAGFVK                     | 1371.5             | 2            | 3.6412 | 0.389  |
| YGDSGEQIAGFVKEFSHIAFLTIK          | 2659.0             | 3            | 3.4562 | 0.2537 |
| YGDYNKEIHKPGYLANDR                | 2154.3             | 2            | 4.7742 | 0.4303 |
| YGEAGEGPGWGGAHPR                  | 1598.7             | 2            | 4.2483 | 0.4855 |
| YGEDGLAGESVEFQNLATLKPSNK          | 2568.8             | 3            | 5.0646 | 0.4236 |
| YGEDSEQFRDASK                     | 1532.6             | 2            | 3.4536 | 0.361  |
| YGEGDSLTLQQLK                     | 1452.6             | 2            | 4.4022 | 0.4211 |
| YGEIPAELR                         | 1048.2             | 2            | 2.652  | 0.165  |
| YGELISTPLVSKALSNRGQHSISYTLR       | 3079.5             | 3            | 3.4998 | 0.2084 |
| YGEPGEVFINK                       | 1253.4             | 2            | 3.4488 | 0.3283 |
| YGEPGEVFINKGK                     | 1438.6             | 2            | 3.726  | 0.3358 |
| YGFGEAGKPK                        | 1054.2             | 2            | 2.4805 | 0.2774 |
| YGFIEGHVVIPR                      | 1387.6             | 2            | 4.1895 | 0.4007 |
| YGFLWPGLNVPLMK                    | 1636.0             | 2            | 3.565  | 0.2773 |
| YGFNSHGLSVVEHR                    | 1602.7             | 2            | 2.7548 | 0.223  |
| YGFQEQLLYSVLEELVNSGR              | 2345.6             | 2            | 3.0162 | 0.2141 |
| YGGDEIPFSPYR                      | 1401.5             | 2            | 3.3443 | 0.177  |
| YGGEEEDQPIYLAVK                   | 1711.9             | 2            | 5.0179 | 0.4466 |
| YGGEGAESMMGFFHELLK                | 2004.3             | 2            | 2.6845 | 0.1172 |
| YGGELVPHFPAR                      | 1343.5             | 2            | 3.37   | 0.3829 |
| YGGETKVYVGNLGTGAGKGELER           | 2356.6             | 3            | 3.7544 | 0.2533 |
| YGGGNYGPGGSGGSGGYGGR              | 1734.7             | 2            | 4.5452 | 0.4583 |
| YGGHGYSHILTNVVPK                  | 1743.0             | 2            | 4.0976 | 0.4157 |
| YGGPNHIVGSPFK                     | 1373.5             | 2            | 2.9718 | 0.2017 |
| YGGPPPDSVYSGQQPSVGTEIFVGK         | 2567.8             | 3            | 3.7634 | 0.1847 |
| YGGPPPDSVYSGQQPSVGTEIFVGKIPR      | 2934.3             | 3            | 4.5085 | 0.4041 |
| YGGPPPDSVYSGVQPGIGTEVFVGK         | 2508.8             | 3            | 5.1611 | 0.3645 |
| YGGPPPDSVYSGVQPGIGTEVFVGKIPR      | 2875.2             | 3            | 5.5804 | 0.34   |
| YGGPYHIGGSPFK                     | 1380.5             | 3            | 3.8843 | 0.3578 |
| YGGQPLFSEKFPTLWSGAR               | 2142.4             | 3            | 4.7188 | 0.4661 |
| YGGRDYSLDEFEANKILHQHLGAPEER       | 3146.4             | 3            | 5.8033 | 0.4414 |
| YGGTFQNVSVQLPITLNK                | 1980.3             | 2            | 2.8186 | 0.1734 |
| YGINTTDIFQTVDLWEGK                | 2101.3             | 2            | 6.1383 | 0.5662 |
| YGISGELAMRPLASLSGGQK              | 2036.3             | 2            | 3.7008 | 0.3254 |
| YGISNEKPEVK                       | 1264.4             | 2            | 2.4817 | 0.1729 |

| Peptide Sequence                         | Peptide mass (m/z) | Charge State | Xcorr  | DelCn2 |
|------------------------------------------|--------------------|--------------|--------|--------|
| YGISSMIQSQEKPDR                          | 1739.9             | 2            | 4.0472 | 0.4493 |
| YGIVDYMIEQSGPPSK                         | 1785.0             | 2            | 2.5518 | 0.106  |
| YGIVDYMIEQSGPPSKEILTLK                   | 2482.9             | 3            | 4.5861 | 0.4247 |
| YGIVLDAGSSR                              | 1138.3             | 2            | 2.4612 | 0.1301 |
| YGKDATNVGDEGGFAPNILENK                   | 2310.5             | 3            | 6.1329 | 0.5601 |
| YGKDATNVGDEGGFAPNILENKEGLELLK            | 3093.4             | 3            | 7.2242 | 0.3137 |
| YGKDATNVGDEGGFAPNILENKEGLELLKTAIGK       | 3564.0             | 3            | 7.1124 | 0.5484 |
| YGKDATNVGDEGGFAPNILENNEALELLK            | 3093.3             | 3            | 3.7278 | 0.2628 |
| YGKDATNVGDEGGFAPNILENSEALELVK            | 3052.3             | 3            | 4.2835 | 0.2364 |
| YGKDATNVGDEGGFAPNILENSEALELVKEAIDK       | 3608.9             | 3            | 3.3894 | 0.1786 |
| YGKDATNVGDEGGFAPNILENSEALELVKEAIDKAGYTEK | 4258.6             | 3            | 6.5354 | 0.4188 |
| YGKIETIEVMEDR                            | 1583.8             | 3            | 3.9605 | 0.3424 |
| YGKLEVANLLLQK                            | 1489.8             | 2            | 2.9712 | 0.1621 |
| YGKSPYLYPLYGLGELPQGFAR                   | 2490.8             | 3            | 5.8209 | 0.4707 |
| YGLAAAVFTR                               | 1069.2             | 2            | 3.5447 | 0.4029 |
| YGLFKEENPYAR                             | 1487.6             | 2            | 2.7596 | 0.233  |
| YGLFPANYVELR                             | 1442.6             | 2            | 2.7257 | 0.3218 |
| YGLFPANYVELRQ                            | 1570.8             | 2            | 3.8167 | 0.344  |
| YGLIFHSTFIGR                             | 1411.6             | 2            | 3.2361 | 0.2949 |
| YGLIGLNGIGK                              | 1105.3             | 2            | 2.7218 | 0.1096 |
| YGLIPEEFFQFLYPK                          | 1892.2             | 2            | 3.4175 | 0.3205 |
| YGLIYHASLVGQTSPK                         | 1735.0             | 2            | 3.5014 | 0.3738 |
| YGLPDSLAILSEMGEVTDGMMMDTK                | 2574.9             | 2            | 5.3398 | 0.5395 |
| YGLVTYATYPK                              | 1276.5             | 2            | 4.0026 | 0.3613 |
| YGMNPHQTPAQLYTLQPK                       | 2088.4             | 2            | 4.5417 | 0.2694 |
| YGMWHFLLGDK                              | 1367.6             | 2            | 2.4572 | 0.1939 |
| YGNLGHVNIGAIQEPLAFILPK                   | 2365.8             | 3            | 4.9148 | 0.2153 |
| YGPIADVSIVYDQQSR                         | 1812.0             | 2            | 5.0385 | 0.4555 |
| YGPIVDVYVPLDFYTR                         | 1918.2             | 2            | 4.2094 | 0.4905 |
| YGPLLDLPELPPPELER                        | 1999.3             | 2            | 4.0505 | 0.1963 |
| YGPLSGVNVVYDQR                           | 1567.7             | 2            | 4.1478 | 0.2544 |
| YGPQYGHPPPPPPPEYGPHADSPVLMVYGLDQSK       | 3787.2             | 3            | 6.1274 | 0.4806 |
| YGPSLMPGGNK                              | 1121.3             | 2            | 2.5562 | 0.2708 |
| YGPSLMPGGNKEAWPHIK                       | 1983.3             | 2            | 3.3146 | 0.3217 |
| YQQFSGLNPGGRPITPPR                       | 1915.1             | 3            | 3.6946 | 0.2159 |
| YQQGAGEGSTR                              | 1083.1             | 2            | 3.0857 | 0.334  |

| Peptide Sequence                  | Peptide mass (m/z) | Charge State | Xcorr  | DelCn2 |
|-----------------------------------|--------------------|--------------|--------|--------|
| YGQGFYLISPSEFER                   | 1794.0             | 2            | 3.8125 | 0.3221 |
| YGQHPNIITLK                       | 1284.5             | 2            | 2.4881 | 0.1644 |
| YGQISEVVVVK                       | 1221.4             | 2            | 3.5091 | 0.3739 |
| YGQISEVVVVKDR                     | 1492.7             | 3            | 3.936  | 0.3906 |
| YGQNGDFTR                         | 1058.1             | 2            | 3.2437 | 0.2908 |
| YGQVTPLEIDILYQLADLYNASGR          | 2714.0             | 3            | 4.5851 | 0.3807 |
| YGSALASAGDPGHPNHPLHASQNSAR        | 2613.7             | 3            | 3.926  | 0.3123 |
| YGSDIVPFSK                        | 1113.2             | 2            | 3.3521 | 0.3646 |
| YGSDIVPFSKVDDEEQMK                | 1973.2             | 2            | 5.4123 | 0.3821 |
| YGSYNVFWTSNPGLPLLTEMVK            | 2517.9             | 3            | 4.3311 | 0.2342 |
| YGVIIIDEAHER                      | 1415.6             | 2            | 2.6232 | 0.3451 |
| YGVMDTTTAQGR                      | 1300.4             | 2            | 4.1373 | 0.5153 |
| YGVNPGPIVGTR                      | 1331.5             | 2            | 3.4366 | 0.3507 |
| YGVQADRVDK                        | 1151.3             | 2            | 2.9588 | 0.2186 |
| YGVSGYPTLK                        | 1085.2             | 1            | 3.3221 | 0.3888 |
| YGYTHLSAGELLR                     | 1480.6             | 3            | 4.6434 | 0.3777 |
| YGYTHLSAGELLRDER                  | 1881.0             | 2            | 4.0233 | 0.3842 |
| YGYTHLSAGELLRDERKNPDSQYGELIEK     | 3383.7             | 3            | 4.6148 | 0.2846 |
| YGYTHLSTGDLLR                     | 1496.6             | 2            | 4.1472 | 0.4181 |
| YGYTHLSTGDLLRSEVSSGSAR            | 2357.5             | 3            | 3.2648 | 0.1987 |
| YHEEFEK                           | 982.0              | 2            | 2.5167 | 0.1629 |
| YHFNMGLLMGEAR                     | 1539.8             | 2            | 2.6628 | 0.1854 |
| YHFVPGTTAVLTQTVKPLTLELVEETVQAMEVE | 3675.2             | 3            | 3.9071 | 0.27   |
| YHGDSVASLGTQPDLSALYQENYK          | 2714.9             | 3            | 6.5008 | 0.4157 |
| YHGHSMSDPGVSYSR                   | 1593.7             | 3            | 3.3622 | 0.3231 |
| YHGQLTK                           | 847.0              | 1            | 2.3433 | 0.1746 |
| YHIDLDPHFNDILGQHSR                | 2178.4             | 2            | 5.0046 | 0.3866 |
| YHIEVNRVPAGNWWLIEGVDPQPIVK        | 2847.3             | 3            | 3.5841 | 0.1079 |
| YHLGAYTGDDVR                      | 1367.4             | 2            | 3.5556 | 0.3387 |
| YHNVGLSK                          | 918.0              | 1            | 2.7127 | 0.2443 |
| YHPDKNKEPGAEEK                    | 1642.8             | 2            | 2.8084 | 0.2774 |
| YHQIGSGK                          | 890.0              | 1            | 2.5414 | 0.19   |
| YHSDEYIK                          | 1055.1             | 2            | 2.4945 | 0.1788 |
| YHSLAPMYR                         | 1301.5             | 2            | 2.7723 | 0.1843 |
| YHSYKDLSEFLR                      | 1558.7             | 3            | 3.3956 | 0.3145 |
| YHTEIVFAR                         | 1136.3             | 2            | 2.4369 | 0.1646 |

| Peptide Sequence                | Peptide mass (m/z) | Charge State | Xcorr  | DelCn2 |
|---------------------------------|--------------------|--------------|--------|--------|
| YHTINGHNAEVR                    | 1411.5             | 2            | 3.8644 | 0.4283 |
| YHTINGHNAEVRK                   | 1539.7             | 2            | 3.3078 | 0.2878 |
| YHTINGHNCEVK                    | 1415.6             | 2            | 3.5546 | 0.2837 |
| YHTSQSGDEMTSLSEYVSR             | 2178.3             | 2            | 5.7071 | 0.5217 |
| YHTVKGHNCEVRK                   | 1571.8             | 2            | 3.0356 | 0.2064 |
| YHTVNGHNCEVR                    | 1429.5             | 2            | 3.845  | 0.3803 |
| YHVLVNLGK                       | 1043.2             | 2            | 2.7689 | 0.1042 |
| YHVLVNLGKK                      | 1171.4             | 2            | 2.5339 | 0.193  |
| YHVMANHNLSLPILK                 | 1637.9             | 2            | 2.9993 | 0.2086 |
| YHVPVVVVPEGSASDTHEQAILR         | 2504.8             | 2            | 5.56   | 0.4833 |
| YHYLGGR                         | 866.0              | 1            | 2.2102 | 0.2903 |
| YIAENGTDPINNQPLSEEQLIDIK        | 2716.0             | 3            | 5.1873 | 0.3665 |
| YIAIASTTVETTDPEKEVEPALELLEPIDQK | 3444.8             | 3            | 4.0252 | 0.2379 |
| YIAIVSTTVETKEPEKEIRPALELLEPIEQK | 3569.1             | 3            | 5.4423 | 0.4172 |
| YIANLGHGGLYPDMDPEHVGAFVDAVHK    | 2967.3             | 3            | 5.9786 | 0.4864 |
| YIAPTVLTDVDPK                   | 1432.6             | 2            | 3.241  | 0.2509 |
| YICEKIMDINK                     | 1370.7             | 2            | 2.7716 | 0.1037 |
| YICENQDSISSK                    | 1387.5             | 2            | 4.5958 | 0.4066 |
| YIDENQDRYIK                     | 1457.6             | 2            | 3.4723 | 0.2931 |
| YIDENQDRYIKK                    | 1585.7             | 2            | 3.341  | 0.2695 |
| YIDITRPEEVKHQEQHHPELEDKDLDFK    | 3490.8             | 3            | 3.6835 | 0.2931 |
| YIDLEPDTPLSPEELKEK              | 2117.3             | 3            | 3.3814 | 0.2233 |
| YIDQEELNK                       | 1152.2             | 2            | 3.6691 | 0.2083 |
| YIDQEELNKTKPIWTR                | 2035.3             | 2            | 4.2289 | 0.4221 |
| YIDQEELNKTKPIWTRNPDDITNEEYGEFYK | 3851.1             | 3            | 5.3108 | 0.5218 |
| YIDQEELNKTKPIWTRNPDDITQEEYGEFYK | 3865.2             | 3            | 5.3768 | 0.4654 |
| YIDTEHGGSQAR                    | 1334.4             | 2            | 3.3218 | 0.3157 |
| YIETDPANR                       | 1079.1             | 2            | 2.7334 | 0.2535 |
| YIEVFKSHR                       | 1179.4             | 2            | 2.5102 | 0.2775 |
| YIEVFKSSQEEVR                   | 1614.8             | 2            | 4.5096 | 0.4139 |
| YIGNMHGNEAVGR                   | 1418.6             | 2            | 3.8209 | 0.415  |
| YIGNMHGNEVVGR                   | 1446.6             | 2            | 3.4037 | 0.3029 |
| YIGTGHADTTK                     | 1164.3             | 2            | 2.6857 | 0.2022 |
| YIHLENLLAR                      | 1242.5             | 2            | 2.8342 | 0.2609 |
| YIIDKYGNHPAFYR                  | 1758.0             | 2            | 3.2981 | 0.3526 |
| YIIHKYPSLELER                   | 1661.9             | 2            | 3.5555 | 0.3517 |

| Peptide Sequence                      | Peptide mass (m/z) | Charge State | Xcorr  | DelCn2 |
|---------------------------------------|--------------------|--------------|--------|--------|
| YIITHELLAHTPHEHVER                    | 2309.6             | 3            | 3.399  | 0.2723 |
| YIKDKYPNLQVIGGNVVTAAQAK               | 2491.9             | 3            | 4.519  | 0.3287 |
| YILGNPLTPGVTQGPQIDKEQYDK              | 2676.0             | 2            | 4.3279 | 0.4828 |
| YILGNPLTPGVTQGPQIDKEQYDKILDIESGK      | 3645.1             | 3            | 4.609  | 0.2821 |
| YILGNPLTPGVTQGPQIDKEQYDKILDIESGKK     | 3773.3             | 3            | 5.0839 | 0.4498 |
| YILGNPLTPGVTQGPQIDKEQYDKILDIESGKKEGAK | 4158.7             | 3            | 5.1666 | 0.3855 |
| YINENLIVNTDELGR                       | 1763.9             | 2            | 4.6255 | 0.3191 |
| YINMLTR                               | 911.1              | 2            | 2.5285 | 0.1416 |
| YINMLTRPR                             | 1164.4             | 1            | 1.9146 | 0.1263 |
| YINTEHGGSQAR                          | 1333.4             | 2            | 3.1807 | 0.1446 |
| YIQHTYR                               | 981.1              | 2            | 2.4041 | 0.2785 |
| YIQPWESEFIDSQR                        | 1798.9             | 3            | 3.5736 | 0.3369 |
| YIQQTKPLTLER                          | 1490.7             | 2            | 3.635  | 0.1315 |
| YIRKPIDYTIILDDIGHGVK                  | 2217.6             | 3            | 3.4314 | 0.2545 |
| YIRKPIDYTVLDDVGHGVK                   | 2189.5             | 3            | 4.6373 | 0.3723 |
| YISGSIHYSR                            | 1183.3             | 2            | 2.6054 | 0.292  |
| YISLIYTYEAGKDDYVK                     | 2156.4             | 2            | 5.2653 | 0.4634 |
| YISPDQLADLYK                          | 1426.6             | 2            | 4.0356 | 0.3756 |
| YITGDQLGALYQDFVR                      | 1860.1             | 2            | 5.4239 | 0.5297 |
| YITGDQLGALYQDFVRDYPVVSIEDPFDQDDWAAWSK | 4325.7             | 3            | 5.9262 | 0.4572 |
| YITGTDILDMKLEDILESINSIK               | 2626.0             | 2            | 3.4326 | 0.2197 |
| YITHESDDAR                            | 1207.2             | 2            | 2.5399 | 0.2482 |
| YITQNGDYQLR                           | 1371.5             | 2            | 3.3957 | 0.3859 |
| YIVLAKDFEK                            | 1226.4             | 2            | 2.6231 | 0.2362 |
| YIVPMLTVDGK                           | 1236.5             | 2            | 3.1787 | 0.2879 |
| YIYDSAFHPDTGEK                        | 1643.7             | 2            | 4.3478 | 0.4626 |
| YKAEDEK                               | 882.9              | 1            | 2.5336 | 0.1339 |
| YKAEDEKQR                             | 1167.3             | 2            | 3.2287 | 0.2184 |
| YKAEDEVQR                             | 1138.2             | 2            | 3.3295 | 0.2245 |
| YKAEDEVQRER                           | 1423.5             | 2            | 2.5994 | 0.2483 |
| YKAPFHQLR                             | 1160.4             | 2            | 2.7232 | 0.1464 |
| YKASITALEAK                           | 1195.4             | 2            | 3.4018 | 0.3609 |
| YKDAANLLNDALAIR                       | 1661.9             | 2            | 3.853  | 0.3724 |
| YKDAIHFYNK                            | 1299.5             | 2            | 3.6592 | 0.3118 |
| YKDDPVDLR                             | 1121.2             | 2            | 2.803  | 0.2024 |
| YKDDPVDLRLDIER                        | 1747.9             | 2            | 2.8403 | 0.3673 |



| Peptide Sequence                         | Peptide mass (m/z) | Charge State | Xcorr  | DelCn2 |
|------------------------------------------|--------------------|--------------|--------|--------|
| YKDEAQLYKEEHLR                           | 1823.0             | 2            | 4.9886 | 0.455  |
| YKDGTELELKENDIKPLTSFR                    | 2497.8             | 3            | 5.438  | 0.3684 |
| YKDILPFDHSR                              | 1391.6             | 3            | 3.3314 | 0.1449 |
| YKDINITKPASVQVQLR                        | 1993.3             | 2            | 4.5257 | 0.318  |
| YKDLDEDELLGNLSETELK                      | 2225.4             | 3            | 4.4569 | 0.2422 |
| YKDLDEDELLGNLSETELKQLETVLDDLDPENALLPAGFR | 4533.9             | 3            | 4.6355 | 0.2967 |
| YKDLVPDNSK                               | 1179.3             | 2            | 3.1785 | 0.2449 |
| YKDNPFSLGESFGSR                          | 1704.8             | 2            | 2.637  | 0.2149 |
| YKDSAQRDDMIFEDCGDVPSEPKER                | 2932.1             | 3            | 5.5999 | 0.4027 |
| YKEAAHLLNDALAIR                          | 1698.9             | 2            | 3.8538 | 0.3446 |
| YKEALLGR                                 | 950.1              | 2            | 2.7299 | 0.2225 |
| YKEATDLLHDALQIR                          | 1787.0             | 2            | 2.6477 | 0.2723 |
| YKEEFEKNK                                | 1215.3             | 2            | 3.4469 | 0.2104 |
| YKEETIEK                                 | 1040.1             | 2            | 2.4057 | 0.124  |
| YKEEYAVLISEAQAIK                         | 1856.1             | 2            | 4.5297 | 0.2231 |
| YKEEYAVLISEAQAIKADLAAVEAK                | 2725.1             | 2            | 7.7791 | 0.5889 |
| YKELGEKLSKDPNIVIAK                       | 2046.4             | 2            | 5.9703 | 0.4011 |
| YKETDLLILFK                              | 1383.7             | 2            | 3.772  | 0.2426 |
| YKETDLLILFKDDYFAK                        | 2123.4             | 2            | 5.061  | 0.4854 |
| YKEVAELTR                                | 1109.3             | 2            | 2.8664 | 0.2377 |
| YKGQHVPQSPFQFTVGPLGEGGAHK                | 2596.9             | 3            | 3.7797 | 0.3507 |
| YKHFDWLYER                               | 1457.6             | 2            | 2.4401 | 0.1574 |
| YKHVEQNGEK                               | 1232.3             | 2            | 2.5258 | 0.2231 |
| YKLAVADAVIEK                             | 1320.6             | 2            | 2.7618 | 0.231  |
| YKLDKESYPVFYLFYR                         | 1969.3             | 2            | 5.3736 | 0.4776 |
| YKLDKESYPVFYLFYRFDGDFENPVPYTGAVK         | 3560.0             | 3            | 4.5356 | 0.3212 |
| YKLLGGLAVR                               | 1090.3             | 2            | 2.6569 | 0.2347 |
| YKNILPFDHSR                              | 1390.6             | 2            | 3.3327 | 0.1038 |
| YKNILPFDHTR                              | 1404.6             | 2            | 3.7019 | 0.281  |
| YKNREPLMPSPQFIK                          | 1849.2             | 2            | 3.4397 | 0.3057 |
| YKNWPESVYFFK                             | 1608.8             | 2            | 2.6129 | 0.2098 |
| YKPAVNQIECHPYLTQEK                       | 2162.5             | 2            | 4.0812 | 0.3719 |
| YKPESEELTAER                             | 1452.5             | 2            | 3.4187 | 0.3422 |
| YKPLDLRPPK                               | 1258.5             | 2            | 2.7138 | 0.1615 |
| YKPVCNQVECHPYFNQR                        | 2126.4             | 2            | 4.2001 | 0.3022 |
| YKPVCNQVECHPYFNK                         | 1998.3             | 2            | 3.1819 | 0.2812 |

| Peptide Sequence                    | Peptide mass (m/z) | Charge State | Xcorr  | DelCn2 |
|-------------------------------------|--------------------|--------------|--------|--------|
| YKPVEEALLQAEAPR                     | 1779.0             | 2            | 3.9952 | 0.4004 |
| YKQDVYLLPK                          | 1267.5             | 2            | 2.9188 | 0.2264 |
| YKQETEQLVSNLKEENTLLK                | 2408.7             | 3            | 4.2599 | 0.1906 |
| YKQIFLGGVDKR                        | 1424.7             | 2            | 3.5179 | 0.2955 |
| YKQSLDDAAK                          | 1139.2             | 2            | 2.8258 | 0.1586 |
| YKRPGYGAYDAFK                       | 1536.7             | 3            | 3.9245 | 0.3674 |
| YKSVLAETEGILQK                      | 1579.8             | 2            | 3.7985 | 0.2042 |
| YKSYSPYDMLIESIRK                    | 1881.1             | 2            | 2.6549 | 0.2188 |
| YKTPDFESTGLYSAMPR                   | 1964.2             | 3            | 4.2464 | 0.4585 |
| YKTQIDHYVGIAR                       | 1564.8             | 2            | 4.1632 | 0.3986 |
| YKVEGFPTIYFAPSGDK                   | 1920.2             | 2            | 5.0245 | 0.4777 |
| YKVEGFPTIYFAPSGDKK                  | 2048.3             | 2            | 5.1197 | 0.4341 |
| YKVEGFPTIYFAPSGDKKNPVK              | 2486.8             | 3            | 3.7624 | 0.2676 |
| YKVEGFPTIYFAPSGDKKNPVKFEGGDR        | 3148.5             | 3            | 5.0432 | 0.4106 |
| YKVEGFPTIYFAPSGDKKNPVKFEGGDRDLEHLSK | 3971.4             | 3            | 5.3473 | 0.414  |
| YKVEYPIMYSTDPENGHIFNCIQR            | 2919.3             | 3            | 3.9814 | 0.2383 |
| YKVPDGKPENEFAFNAEFK                 | 2231.4             | 2            | 4.1615 | 0.4014 |
| YKVPDGKPENEFAFNAEFKDKDFAIDIIK       | 3390.8             | 3            | 5.7296 | 0.4544 |
| YKYEDKDGK                           | 1146.2             | 2            | 2.5502 | 0.162  |
| YKYEDKDGKQPVGR                      | 1683.8             | 2            | 4.8414 | 0.4182 |
| YLAAGSSNAVK                         | 1081.2             | 2            | 2.9864 | 0.1554 |
| YLAEFATGNDR                         | 1257.3             | 2            | 2.8833 | 0.2821 |
| YLAEFATGNDRK                        | 1385.5             | 2            | 3.2504 | 0.2664 |
| YLAEFATGNDRKEAAENSLVAYK             | 2561.8             | 2            | 4.9438 | 0.316  |
| YLAEKYEWDAEAR                       | 1743.9             | 2            | 5.0852 | 0.4379 |
| YLAEVAAGDDKK                        | 1280.4             | 2            | 3.7935 | 0.2713 |
| YLAEVAAGDDKKGIVDQSQQAYQEAFEISK      | 3303.6             | 3            | 6.5788 | 0.3891 |
| YLAEVAAGDDKKGIVDQSQQAYQEAFEISKK     | 3431.8             | 3            | 7.0678 | 0.4854 |
| YLAEVACGDDRK                        | 1340.5             | 2            | 3.2225 | 0.3524 |
| YLAEVASGEK                          | 1067.2             | 2            | 2.5783 | 0.1193 |
| YLAEVASGEKK                         | 1195.3             | 2            | 3.176  | 0.2651 |
| YLAEVATGEKR                         | 1237.4             | 2            | 3.1698 | 0.3081 |
| YLAIHGMETLKGETK                     | 1692.0             | 2            | 2.9142 | 0.1545 |
| YLASGAIDGIINIFDIATGK                | 2053.3             | 2            | 5.3786 | 0.4952 |
| YLDEDTIYHLQPSGR                     | 1807.9             | 2            | 4.4481 | 0.402  |
| YLDEIVKEVEAK                        | 1436.6             | 2            | 2.6028 | 0.2762 |

| Peptide Sequence                     | Peptide mass (m/z) | Charge State | Xcorr  | DelCn2 |
|--------------------------------------|--------------------|--------------|--------|--------|
| YLDFVFAVK                            | 1102.3             | 2            | 2.8889 | 0.1873 |
| YLDFVFAVKNENR                        | 1615.8             | 2            | 2.5113 | 0.1216 |
| YLDIPKMLDAEDIVGTARPDEK               | 2490.8             | 3            | 4.1818 | 0.2505 |
| YLDIPKMLDAEDIVNTARPDEK               | 2547.9             | 3            | 4.2047 | 0.1753 |
| YLDQMEDLYEDFHIVK                     | 2059.3             | 2            | 4.9401 | 0.3935 |
| YLDQMEDLYEDFHIVKLPLLPHEVR            | 3114.6             | 3            | 4.6931 | 0.3763 |
| YLDSDTEKELQALYALQASIVKLDQPANLLR      | 3521.0             | 3            | 3.6926 | 0.1591 |
| YLEANMTQSALPK                        | 1466.7             | 2            | 3.3405 | 0.2168 |
| YLECSALTQR                           | 1184.3             | 2            | 2.6759 | 0.2795 |
| YLEDKAQELAR                          | 1336.5             | 2            | 2.4645 | 0.1747 |
| YLEEERPFPAIEQVTGMLLAK                | 2338.7             | 3            | 4.099  | 0.223  |
| YLELLER                              | 936.1              | 2            | 2.4435 | 0.1373 |
| YLENGKDKLER                          | 1365.5             | 2            | 3.1291 | 0.2218 |
| YLENYDAIR                            | 1157.3             | 2            | 3.0444 | 0.3488 |
| YLESKEDVADALLQTDQSLSEKEK             | 2741.0             | 3            | 5.4185 | 0.3733 |
| YLESLGEEQRK                          | 1352.5             | 2            | 2.8271 | 0.1393 |
| YLESLGEEQRKEAER                      | 1838.0             | 2            | 2.6381 | 0.1022 |
| YLEVQYKPQVHIQMTYPLQGLTR              | 2807.3             | 3            | 4.565  | 0.3876 |
| YLFNQLFG EEDADQEVS PDRADPEAAWEPTAEAR | 3998.1             | 3            | 5.4693 | 0.3928 |
| YLG DASVEPDPLQMPTFPPDYGFPER          | 2940.2             | 3            | 4.415  | 0.3042 |
| YLG DASVEPDPLQMPTFPPDYGFPERK         | 3068.4             | 3            | 4.1384 | 0.2051 |
| YLGFGTSPNLGK                         | 1254.4             | 2            | 2.57   | 0.2518 |
| YLG GTDDTVKKKDLFLDLIADVMFGVPSVIVAR   | 3598.2             | 3            | 5.2141 | 0.4901 |
| YLGINS DGLVVGR                       | 1363.5             | 2            | 3.265  | 0.3081 |
| YLG LLENLR                           | 1091.3             | 2            | 2.572  | 0.1497 |
| YLG LLENVR                           | 1077.3             | 2            | 3.0084 | 0.2432 |
| YLGNTVDLSSFDFR                       | 1634.8             | 2            | 3.426  | 0.1886 |
| YLGQDYEQLR                           | 1285.4             | 2            | 2.4518 | 0.1567 |
| YLGQLHYLQSR                          | 1378.6             | 2            | 2.7812 | 0.1593 |
| YLHDESGLNRR                          | 1360.5             | 2            | 2.5296 | 0.1938 |
| YLHENLPIPQR                          | 1380.6             | 2            | 2.9087 | 0.303  |
| YLHLAREDTNNLFSVQFR                   | 2224.5             | 3            | 4.3786 | 0.3871 |
| YLHVG YIVPPAPEK                      | 1583.9             | 2            | 3.8522 | 0.3439 |
| YLHVRPQPLAGEDPPAYQAR                 | 2279.5             | 3            | 4.3495 | 0.1953 |
| YLIATSEQPIAALHR                      | 1683.9             | 2            | 3.2969 | 0.3549 |
| YLIATSEQPIAALHRDEWLRPEDLPIK          | 3176.6             | 3            | 4.4834 | 0.3763 |

| Peptide Sequence                      | Peptide mass (m/z) | Charge State | Xcorr  | DelCn2 |
|---------------------------------------|--------------------|--------------|--------|--------|
| YLINLCGMDFPIK                         | 1527.9             | 2            | 2.436  | 0.1221 |
| YLIPNATQPESK                          | 1361.5             | 2            | 3.2276 | 0.2216 |
| YLKDLLGIQTTGPLELLQFDHGQSNPTYIIR       | 3596.0             | 3            | 4.2523 | 0.2537 |
| YLKDVTLQK                             | 1108.3             | 2            | 3.0183 | 0.221  |
| YLKSEPIPESNDGPVK                      | 1774.0             | 2            | 4.2664 | 0.3901 |
| YLLDHFLSMGINK                         | 1551.8             | 2            | 4.5367 | 0.4266 |
| YLLETSGNLDGLEYSK                      | 1715.9             | 2            | 5.0455 | 0.5135 |
| YLLETSGNLDGLEYSK                      | 2604.9             | 3            | 3.7264 | 0.2755 |
| YLLNLNLEPFSEK                         | 1580.8             | 2            | 5.0833 | 0.2278 |
| YLLQYQEPICEQLVTALCDIKQAYTQFGGK        | 3563.1             | 3            | 3.744  | 0.1911 |
| YLLSQSSPAPLTAEEEEELR                  | 2076.3             | 2            | 5.4946 | 0.4511 |
| YLLSQSSPAPLTAEEEEELRQIK               | 2445.8             | 3            | 4.446  | 0.4104 |
| YLMDEGAHLHIYDPK                       | 1803.0             | 2            | 3.6016 | 0.1552 |
| YLMEEDEDAYKK                          | 1534.7             | 2            | 3.882  | 0.3663 |
| YLMEEDEDAYKKQFSQYIK                   | 2429.7             | 2            | 4.8508 | 0.4177 |
| YLNEYGAPDAGGLEHVPLGWSYWYALEK          | 3200.5             | 3            | 3.9015 | 0.1154 |
| YLNFFTK                               | 933.1              | 2            | 2.4149 | 0.1616 |
| YLNFKVKGVVDSDDLPLNVSR                 | 2251.5             | 3            | 6.1128 | 0.5521 |
| YLNFKVKGVVDSDDLPLNVSR                 | 3116.5             | 3            | 3.9142 | 0.3041 |
| YLNIFGESQPNPK                         | 1507.7             | 2            | 2.7522 | 0.2589 |
| YLNQDYEARNECLEAGTLFQDPSFPAIPALGFK     | 3920.4             | 3            | 5.3876 | 0.3551 |
| YLNSSGGFIGYAPYVNR                     | 1792.0             | 2            | 4.2344 | 0.3664 |
| YLNTPVGGLEYSK                         | 1680.9             | 2            | 4.6102 | 0.4369 |
| YLPDTLLLEECGLLR                       | 1749.1             | 2            | 4.1189 | 0.4259 |
| YLPDMAEKDSLDPSTHAMQLLTAEIEK           | 3322.8             | 3            | 5.1497 | 0.492  |
| YLPGHKLPPNVVAVPDVVQAAEDADILIFVPHQFIGK | 4108.8             | 3            | 4.0161 | 0.1545 |
| YLPHSAGR                              | 901.0              | 1            | 1.9023 | 0.1474 |
| YLPRPANPDEIGNFIDENLK                  | 2316.6             | 3            | 5.7257 | 0.367  |
| YLQDLLAWVEENQHR                       | 1915.1             | 2            | 3.8788 | 0.3608 |
| YLQELDKDHAR                           | 1388.5             | 2            | 2.627  | 0.2369 |
| YLQEVIDVLETGDFR                       | 1935.1             | 2            | 4.2773 | 0.365  |
| YLQEVIDVLETGDFREK                     | 2192.4             | 2            | 2.6821 | 0.1687 |
| YLQLTQSELSSYHRK                       | 1854.1             | 2            | 3.4023 | 0.1488 |
| YLQQLAEKPLETR                         | 1589.8             | 2            | 3.8024 | 0.1949 |
| YLQTLTTIAAEK                          | 1352.6             | 2            | 4.0066 | 0.3859 |
| YLRAEPEDHYFLLTEPPLNTPENR              | 2916.2             | 3            | 4.6851 | 0.255  |

| Peptide Sequence                     | Peptide mass (m/z) | Charge State | Xcorr  | DelCn2 |
|--------------------------------------|--------------------|--------------|--------|--------|
| YLREADFAR                            | 1141.3             | 2            | 2.5184 | 0.2371 |
| YLRIPDEIIDMVKEEVVAK                  | 2261.7             | 3            | 5.9474 | 0.2622 |
| YLRPPNTSLFVR                         | 1463.7             | 3            | 3.6391 | 0.3057 |
| YLSAQKPLLNDGQFR                      | 1751.0             | 2            | 4.5288 | 0.4966 |
| YLSEVASGDNK                          | 1183.3             | 2            | 3.8113 | 0.3868 |
| YLSEVASGDNKQTTVSNSQQAYQEAFEISK       | 3324.5             | 3            | 7.1778 | 0.4305 |
| YLSEVASGDNKQTTVSNSQQAYQEAFEISKK      | 3452.7             | 3            | 5.5645 | 0.4689 |
| YLSFHFK                              | 942.1              | 2            | 2.5282 | 0.1462 |
| YLSGIAHFLEK                          | 1278.5             | 2            | 3.1448 | 0.2305 |
| YLSHSEFKDLILPTIQK                    | 2033.4             | 3            | 5.2596 | 0.298  |
| YLSLEQKTEEELEGQIK                    | 1909.1             | 3            | 4.294  | 0.2326 |
| YLSLEQKTEEELEGQIKKLEADSLEVK          | 3022.4             | 3            | 3.3209 | 0.1457 |
| YLSNAYAR                             | 958.1              | 2            | 2.486  | 0.1483 |
| YLSQLKDAHR                           | 1231.4             | 2            | 3.2075 | 0.2047 |
| YLSYTLNPDILIR                        | 1468.7             | 2            | 3.7373 | 0.3777 |
| YLTESYGTGQDIDDR                      | 1733.8             | 2            | 4.0764 | 0.4379 |
| YLTESYGTGQDIDDRIVEANPLLEAFGNAK       | 3301.6             | 3            | 6.0855 | 0.5053 |
| YLTLDIFAGPPNYPFSDEY                  | 2223.4             | 2            | 3.3692 | 0.3535 |
| YLTVAAIIR                            | 1054.3             | 2            | 3.3317 | 0.3282 |
| YLTVAAVFR                            | 1040.2             | 2            | 3.2819 | 0.333  |
| YLTVATVFR                            | 1070.3             | 2            | 2.7488 | 0.2926 |
| YLTVQNTVR                            | 1094.2             | 2            | 2.6066 | 0.2159 |
| YLVAPDGKVVGAWDPTVSVEEVRPQITALVR      | 3366.9             | 3            | 3.4136 | 0.2127 |
| YLVGACGRARGR                         | 1279.5             | 2            | 2.4473 | 0.1066 |
| YLVVDLVQVEYIEKHNLYSSESEDRNAGVILAPLQR | 4061.5             | 3            | 3.4014 | 0.2579 |
| YLVVEPPEGDGALCLVCR                   | 1934.3             | 2            | 2.5481 | 0.1518 |
| YLYEIAR                              | 928.1              | 2            | 3.1072 | 0.182  |
| YLYPNIDKDHAFGK                       | 1681.9             | 2            | 3.6757 | 0.4656 |
| YLYRYPGGESYQDLVQR                    | 2108.3             | 3            | 3.3313 | 0.1988 |
| YLYTLVITDKEK                         | 1486.7             | 2            | 3.7656 | 0.3718 |
| YLYTLVITDKEKAEK                      | 1815.1             | 2            | 5.1231 | 0.3148 |
| YLYVDKNFINNPLAQADWAAK                | 2455.8             | 3            | 5.6061 | 0.446  |
| YMAEALLLR                            | 1080.3             | 2            | 3.2261 | 0.3185 |
| YMAFAHDLMADAQR                       | 1640.9             | 2            | 4.2206 | 0.5208 |
| YMASGPVVAMVWQGLDVVR                  | 2079.5             | 2            | 2.76   | 0.1951 |
| YMDIEFDFKGDPLGGVISNYLLEK             | 2765.1             | 3            | 4.4639 | 0.2818 |

| Peptide Sequence              | Peptide mass (m/z) | Charge State | Xcorr  | DelCn2 |
|-------------------------------|--------------------|--------------|--------|--------|
| YMDINDFKGDPIGGHINNYLLEK       | 2815.2             | 3            | 5.2052 | 0.4141 |
| YMDNDYAK                      | 1020.1             | 2            | 2.7729 | 0.2674 |
| YMEDYHQFHEDVKDAQELLR          | 2567.8             | 3            | 4.6562 | 0.3674 |
| YMEENDQLKK                    | 1298.4             | 2            | 3.2547 | 0.2675 |
| YMIGVTYGGDDIPLSPYR            | 2018.3             | 2            | 5.9273 | 0.4603 |
| YMMIVDPAISSSGPAGSYRPHYDEGLRR  | 2990.4             | 3            | 3.3832 | 0.1744 |
| YMNPAIVAPDAFDIIDLSAGGQLTTDQR  | 2994.3             | 2            | 3.8214 | 0.2833 |
| YMNPAIVAPDAFDIIDLSAGGQLTTDQRR | 3150.5             | 3            | 3.5029 | 0.2111 |
| YMNSGPVVAMVWEGLNVVK           | 2094.5             | 2            | 5.5414 | 0.5219 |
| YMSPMEAQEFGLDK                | 1760.0             | 2            | 3.2505 | 0.1625 |
| YMSVNQAAQQLLEIVQNQR           | 2234.5             | 3            | 3.8937 | 0.2146 |
| YMVADKFTLQK                   | 1473.7             | 2            | 3.9599 | 0.4256 |
| YMVSGTINVYGILR                | 1473.7             | 2            | 3.8197 | 0.3825 |
| YNADEAR                       | 838.8              | 1            | 1.8106 | 0.1395 |
| YNALLAVQK                     | 1020.2             | 2            | 2.8129 | 0.1743 |
| YNAPTSHVTPSVK                 | 1401.5             | 2            | 3.2047 | 0.2958 |
| YNDKHIPGSPFTAK                | 1575.7             | 2            | 3.2689 | 0.3255 |
| YNEDLELEDAIHTAILTLK           | 2202.4             | 2            | 6.1952 | 0.5261 |
| YNEEERAQQEAEAAQR              | 1922.9             | 2            | 3.3895 | 0.2657 |
| YNEETFGYEVPIKEEGDYVLVLK       | 2736.0             | 3            | 5.0842 | 0.4271 |
| YNEQHVPGPSPTAR                | 1603.7             | 2            | 3.8175 | 0.3846 |
| YNFPNPNPFVEDDMDKNEIASVAYR     | 2947.2             | 3            | 3.4843 | 0.3758 |
| YNFPVEVEVPMER                 | 1609.8             | 2            | 3.229  | 0.3799 |
| YNHIDSEMK                     | 1266.4             | 2            | 2.8023 | 0.119  |
| YNHSHDQLVLTGSSDSR             | 1917.0             | 2            | 4.2946 | 0.3512 |
| YNIKDIAAHIK                   | 1415.6             | 3            | 3.7485 | 0.2465 |
| YNIKDIAAHIKK                  | 1543.8             | 2            | 3.8238 | 0.3257 |
| YNIKDIAAHLK                   | 1415.6             | 2            | 4.2416 | 0.3112 |
| YNIKDIAAHLKK                  | 1543.8             | 2            | 3.5613 | 0.2996 |
| YNIKDIAAYIK                   | 1441.7             | 2            | 3.6825 | 0.3129 |
| YNIKDIAAYIKK                  | 1569.8             | 3            | 4.4645 | 0.2947 |
| YNILGTNAIMDK                  | 1353.6             | 2            | 3.433  | 0.1594 |
| YNILGTNTIMDK                  | 1383.6             | 2            | 3.6951 | 0.2943 |
| YNKWETIEAWTQQVATENPALISR      | 2850.1             | 3            | 4.4188 | 0.3905 |
| YNLGLDLR                      | 964.1              | 2            | 2.9386 | 0.1562 |
| YNLHQIQGHSAPR                 | 1521.7             | 3            | 3.3651 | 0.166  |

| Peptide Sequence                  | Peptide mass (m/z) | Charge State | Xcorr  | DelCn2 |
|-----------------------------------|--------------------|--------------|--------|--------|
| YNLPESAPLIYNSFAQFLVK              | 2315.7             | 3            | 4.3708 | 0.3313 |
| YNNQLATR                          | 980.1              | 2            | 2.49   | 0.1297 |
| YNPTWHCIVGR                       | 1346.5             | 2            | 2.6878 | 0.3026 |
| YNPVGASELRDLYLKTENYLGGEYFAR       | 3140.5             | 3            | 3.6389 | 0.2113 |
| YNQLLRIEEELGSK                    | 1692.9             | 2            | 4.1548 | 0.3525 |
| YNQLLRIEEELGSKAK                  | 1892.1             | 2            | 4.238  | 0.3392 |
| YNQLMRIEEELGDEAR                  | 1967.2             | 3            | 4.0635 | 0.2452 |
| YNSDKSSTYVK                       | 1292.4             | 2            | 3.4028 | 0.3772 |
| YNVLGAETVLNQMR                    | 1608.8             | 2            | 4.9826 | 0.4726 |
| YNVPFLTFINKLDR                    | 1741.0             | 2            | 3.3651 | 0.3413 |
| YNYLKPR                           | 954.1              | 2            | 2.5147 | 0.1022 |
| YPALHKPENQDIDWGALEGETR            | 2540.7             | 3            | 4.2884 | 0.3161 |
| YPASTVQILGAEK                     | 1377.6             | 2            | 3.7648 | 0.3637 |
| YPAVSAPK                          | 833.0              | 1            | 1.6102 | 0.1256 |
| YPDQWIVPGGGMEPEEEPPGGA AVR        | 2542.8             | 2            | 3.4541 | 0.2105 |
| YPEDKITPENLPQILLQLK               | 2253.6             | 2            | 2.8712 | 0.103  |
| YPEEFALRDQEK                      | 1525.6             | 2            | 3.6824 | 0.1526 |
| YPGGESYQDLVQR                     | 1512.6             | 2            | 3.1998 | 0.3012 |
| YPGPQAEGDSEGLSQGLVDR              | 2076.2             | 2            | 5.5541 | 0.4918 |
| YPGPQAEGDSEGLSQGLVDREK            | 2333.5             | 3            | 5.5422 | 0.4767 |
| YPGSPGSYAAR                       | 1126.2             | 2            | 2.4418 | 0.1645 |
| YPHIKDGEDLKD HSTESK               | 2100.2             | 2            | 3.9447 | 0.3377 |
| YPHLGQKPGGSDFLR                   | 1672.9             | 2            | 3.2751 | 0.419  |
| YPIEHGIITNWDDMEK                  | 1962.2             | 2            | 4.6891 | 0.4006 |
| YPIEHGIITNWDDMEKIWHHTFYNELR       | 3459.8             | 3            | 6.0395 | 0.3231 |
| YPLFEGQETGKK                      | 1397.6             | 2            | 3.0433 | 0.1843 |
| YPM AVGLNK                        | 993.2              | 2            | 2.4762 | 0.143  |
| YPM EHG IITNWDDMEKIWHHTFYNELR     | 3477.9             | 3            | 4.38   | 0.2482 |
| YPM EHG IVDW NDMER                | 2021.3             | 2            | 4.3611 | 0.5231 |
| YPM EHG VVR                       | 1088.3             | 2            | 2.9994 | 0.2073 |
| Y PQL L PGIR                      | 1057.3             | 2            | 2.7143 | 0.1843 |
| Y PSL SLHG IEGAFSGSGAK            | 1879.1             | 3            | 4.6297 | 0.3497 |
| Y PSP FFV FGEK                    | 1318.5             | 2            | 2.4372 | 0.1616 |
| Y P Y Q SF Q TP Q H PS FL F Q DKR | 2515.8             | 2            | 4.4253 | 0.4184 |
| Y P Y W PH Q PIENL                | 1557.7             | 2            | 4.1272 | 0.2554 |
| YQA AVSK                          | 766.9              | 1            | 2.0272 | 0.1496 |

| Peptide Sequence                   | Peptide mass (m/z) | Charge State | Xcorr  | DelCn2 |
|------------------------------------|--------------------|--------------|--------|--------|
| YQASHPNLR                          | 1086.2             | 2            | 2.5768 | 0.2801 |
| YQAVTATLEEK                        | 1253.4             | 2            | 3.5441 | 0.3042 |
| YQDAETLYKEILTR                     | 1743.9             | 2            | 3.8335 | 0.3849 |
| YQDHEDIIIAELDATANELDAFAVHGFPTLK    | 3458.8             | 3            | 7.3586 | 0.5322 |
| YQDIIHSIHLAR                       | 1466.7             | 2            | 2.9372 | 0.342  |
| YQDLGAYSSAR                        | 1231.3             | 2            | 3.1237 | 0.3126 |
| YQDTHPER                           | 1046.1             | 2            | 2.7912 | 0.1427 |
| YQDTPGVK                           | 908.0              | 1            | 1.923  | 0.1275 |
| YQDVDSETFISTR                      | 1561.6             | 2            | 4.8027 | 0.4764 |
| YQEALAKGDVTAQIALQPALK              | 2229.6             | 2            | 5.5929 | 0.5139 |
| YQEALHLGSQLLR                      | 1528.7             | 2            | 4.0975 | 0.4816 |
| YQEEFEHFQQELDKK                    | 1999.1             | 2            | 4.6566 | 0.3889 |
| YQEEFEHFQQELDKKKKEEFQK             | 2789.0             | 3            | 4.6275 | 0.3165 |
| YQEIEEDRKKAELEGVAVTAPR             | 2532.8             | 3            | 5.7043 | 0.4617 |
| YQEQGGEASPQR                       | 1350.4             | 2            | 3.5056 | 0.3266 |
| YQEQGGEASPQSR                      | 1437.5             | 2            | 3.6018 | 0.3517 |
| YQETFNVIER                         | 1299.4             | 2            | 3.0406 | 0.376  |
| YQEVTNNLEFAK                       | 1456.6             | 2            | 3.7796 | 0.2816 |
| YQFVREPEDEEEEEEEEEDEDEDLEELEVLER   | 4189.1             | 3            | 7.9385 | 0.5508 |
| YQGVNLYVK                          | 1084.2             | 2            | 2.6388 | 0.2197 |
| YQILPLHSQIPR                       | 1465.7             | 2            | 3.3    | 0.2901 |
| YQILPLHSQIPREEQR                   | 2008.3             | 2            | 3.6432 | 0.1644 |
| YQKSTELLIR                         | 1251.5             | 3            | 3.2722 | 0.247  |
| YQLDKDGVVLFK                       | 1425.7             | 2            | 4.0002 | 0.3585 |
| YQLDKDGVVLFKK                      | 1553.8             | 2            | 4.6863 | 0.4097 |
| YQLDPTASISAK                       | 1294.4             | 2            | 3.4386 | 0.2224 |
| YQLEIKIPETYPFNPPK                  | 2078.4             | 2            | 3.0345 | 0.1452 |
| YQLEIKIPETYPFNPPKVR                | 2333.7             | 3            | 3.2321 | 0.3003 |
| YQLLQLVEPFGVISNHLILNK              | 2439.9             | 2            | 5.4595 | 0.4053 |
| YQLSIHKNPNTSEPPHLLVMK              | 2478.9             | 2            | 5.1286 | 0.3887 |
| YQPFKPLSIGGIILK                    | 1788.2             | 2            | 3.1791 | 0.2296 |
| YQPFKPLSIGGIILKDTSEDIEELVEPVAAHGPK | 3806.4             | 3            | 3.9245 | 0.2933 |
| YQQAGLPLIVLAGK                     | 1471.8             | 2            | 3.6956 | 0.3454 |
| YQQEVDRIKEAVR                      | 1634.8             | 2            | 2.9401 | 0.1954 |
| YQRDYEEMASR                        | 1448.5             | 2            | 2.7027 | 0.1029 |
| YQRPEGL                            | 863.0              | 2            | 2.4559 | 0.1302 |



| Peptide Sequence                          | Peptide mass (m/z) | Charge State | Xcorr  | DelCn2 |
|-------------------------------------------|--------------------|--------------|--------|--------|
| YQSGGGSVSENHMR                            | 1509.6             | 2            | 4.0202 | 0.4457 |
| YQVFFFGTHETAFLGPK                         | 1990.2             | 2            | 4.0677 | 0.4215 |
| YQVLLDGLVLQGLYQLLEPR                      | 2331.7             | 3            | 4.0749 | 0.3371 |
| YQVSWSLDHK                                | 1263.4             | 2            | 3.0296 | 0.334  |
| YQYGGGLNSGRPVTTPR                         | 1763.0             | 2            | 2.9146 | 0.2846 |
| YRADTLGELDLER                             | 1551.7             | 2            | 3.0857 | 0.2752 |
| YRADTLGELDLERAPALGGSFAGLEPMGLLWALEPEKPLVR | 4454.1             | 3            | 4.3617 | 0.4162 |
| YRDHVTATQLIQK                             | 1573.8             | 2            | 3.455  | 0.2698 |
| YRDILKFPEELEHVESASK                       | 2291.5             | 3            | 3.7445 | 0.1668 |
| YRDLDEDEILGALTEEELR                       | 2280.4             | 3            | 4.1588 | 0.3312 |
| YRDLDEDEILGALTEEELRTLLENELDELDPDNALLPAGLR | 4570.9             | 3            | 4.3407 | 0.3372 |
| YRDTVLLPQTSFPMK                           | 1797.1             | 2            | 3.657  | 0.3395 |
| YRDVSPFDHSR                               | 1379.5             | 2            | 2.9889 | 0.1499 |
| YREDLMAGIIIAGWDPQEGGQVYSVPMGGMMVR         | 3629.2             | 3            | 3.7844 | 0.233  |
| YREWHHFLVVMK                              | 1760.1             | 3            | 3.3925 | 0.3279 |
| YRGEYKDNALLAQLIQDK                        | 2139.4             | 2            | 4.2901 | 0.3187 |
| YRGEYKDNALLAQLIQDKLDAYK                   | 2730.1             | 3            | 5.1556 | 0.3421 |
| YRGFTIPEAFR                               | 1357.5             | 2            | 2.8516 | 0.2787 |
| YRGPGFEDLQNYILEK                          | 2056.3             | 3            | 4.7663 | 0.2484 |
| YRGQHVTGSPFQFTVGPLGEGGAHK                 | 2628.9             | 3            | 5.9208 | 0.4393 |
| YRGSIHDFPGFDPNQDAEALYTAMK                 | 2845.1             | 3            | 6.3946 | 0.5208 |
| YRGVSFYEVPPHLFAVADTVYR                    | 2587.9             | 3            | 4.165  | 0.3449 |
| YRIPVPILPGLPMNNHGNYIVR                    | 2535.0             | 3            | 5.845  | 0.3935 |
| YRPDLIDMNTVAVQSNLANLEHAFYVAEK             | 3323.7             | 3            | 5.4944 | 0.3784 |
| YRPEEVDIDAK                               | 1335.4             | 2            | 2.4592 | 0.1653 |
| YRPGTVALR                                 | 1033.2             | 2            | 2.4211 | 0.2261 |
| YRPLFDYFLK                                | 1362.6             | 2            | 2.6723 | 0.1132 |
| YRQDDDQRSSHYDELLAAEAR                     | 2539.6             | 3            | 4.4906 | 0.3958 |
| YRQFPQLTR                                 | 1209.4             | 2            | 2.6567 | 0.1617 |
| YRSDIHTEAVQAALAK                          | 1774.0             | 2            | 4.0322 | 0.3401 |
| YRVPDVLVADPPIAR                           | 1682.0             | 3            | 3.7459 | 0.3055 |
| YSALFLGVAYGATR                            | 1489.7             | 2            | 4.2067 | 0.454  |
| YSALHAKPONGLILQYGTAGFR                    | 2278.6             | 3            | 4.5016 | 0.2912 |
| YSAQTDITDDSLDR                            | 1600.6             | 2            | 2.7615 | 0.1147 |
| YSDFEWLKNELER                             | 1729.9             | 2            | 3.265  | 0.1541 |
| YSDFEWLKNELERDSK                          | 2060.2             | 3            | 3.319  | 0.1738 |

| Peptide Sequence                 | Peptide mass (m/z) | Charge State | Xcorr  | DelCn2 |
|----------------------------------|--------------------|--------------|--------|--------|
| YSDFEWLR                         | 1116.2             | 2            | 2.6418 | 0.2276 |
| YSDFEWLRSELERESK                 | 2075.2             | 3            | 3.442  | 0.1319 |
| YSDFHDLHEK                       | 1291.4             | 2            | 3.1503 | 0.3271 |
| YSDIDIILLKGDVEEDETIPDSEQDIRPR    | 3375.6             | 3            | 4.4075 | 0.423  |
| YSDIEPSTEGEVIFR                  | 1742.9             | 2            | 4.3054 | 0.3347 |
| YSDMIVAAIQAEK                    | 1439.7             | 2            | 4.7585 | 0.406  |
| YSDMIVAAIQAEKNR                  | 1709.9             | 2            | 3.8776 | 0.4492 |
| YSEKCHDFQCALLANLFASEGQPGK        | 2758.1             | 3            | 3.4517 | 0.1319 |
| YSEKEDKYEEEEIK                   | 1690.8             | 2            | 4.443  | 0.3247 |
| YSEKEDKYEEEEIKLLSDK              | 2247.4             | 3            | 5.5842 | 0.3629 |
| YSEKEDKYEEEEIKLLSDKLK            | 2488.8             | 3            | 5.2204 | 0.3278 |
| YSEKEDKYEEEEIKLLSDKLKEAETR       | 3075.4             | 3            | 5.6312 | 0.3959 |
| YSFHPVEDFPAPEEYKHFQR             | 2524.7             | 3            | 4.1648 | 0.3416 |
| YSFKGPHLVQSDGTVPFWAHAGNAIPSSDQIR | 3484.8             | 3            | 4.4497 | 0.4842 |
| YSFLQFDPAPR                      | 1341.5             | 2            | 3.1739 | 0.317  |
| YSFTFELR                         | 1063.2             | 2            | 2.7152 | 0.2485 |
| YSGAYGASVSDEELK                  | 1576.6             | 2            | 5.4153 | 0.471  |
| YSGAYGASVSDEELKRR                | 1889.0             | 2            | 3.1236 | 0.1032 |
| YSGKTEYQTTK                      | 1306.4             | 2            | 2.7035 | 0.3405 |
| YSGRPVNLMTSL                     | 1395.6             | 2            | 2.6957 | 0.2072 |
| YSGTLNLDR                        | 1039.1             | 2            | 2.6103 | 0.3002 |
| YSGYFGGVTALSR                    | 1378.5             | 2            | 3.9517 | 0.3158 |
| YSHDFNFHINYGDLGFLGPEDLR          | 2727.9             | 3            | 5.9175 | 0.5159 |
| YSHLQPGDHLTDITLK                 | 1839.0             | 2            | 3.0593 | 0.1266 |
| YSHNSLMVQAIK                     | 1391.6             | 2            | 2.4539 | 0.1506 |
| YSHVQEVQER                       | 1275.4             | 2            | 2.9718 | 0.3022 |
| YSHYNERDEIPHNDIALLK              | 2328.5             | 3            | 4.2458 | 0.2208 |
| YSIAITWGGHHIPK                   | 1580.8             | 2            | 3.1308 | 0.2781 |
| YSIGEPTVPSTLAEFTYNPFMR           | 2650.9             | 2            | 3.0634 | 0.3236 |
| YSKEYGK                          | 875.0              | 1            | 2.0538 | 0.1536 |
| YSLDPENPTK                       | 1164.2             | 2            | 2.8457 | 0.2337 |
| YSLEPVAVELK                      | 1248.5             | 2            | 2.8805 | 0.1183 |
| YSLEQDIREKEEAIRQK                | 2136.4             | 3            | 3.358  | 0.1811 |
| YSLKPNDQILAEDKHKELFDELVKK        | 3002.4             | 3            | 4.2519 | 0.2775 |
| YSLSGGGTSSH                      | 1053.1             | 2            | 2.6775 | 0.2851 |
| YSLVEAKR                         | 966.1              | 2            | 2.5389 | 0.1748 |

| Peptide Sequence                     | Peptide mass (m/z) | Charge State | Xcorr  | DelCn2 |
|--------------------------------------|--------------------|--------------|--------|--------|
| YSNENLDLAR                           | 1195.3             | 2            | 3.6575 | 0.3159 |
| YSNFVSFPLYLNGR                       | 1677.9             | 2            | 3.3044 | 0.1348 |
| YSPEFKDPLIDKEYYR                     | 2064.3             | 3            | 3.6458 | 0.2314 |
| YSPTSPTYSPVYTPTSPK                   | 2259.5             | 2            | 5.1375 | 0.4375 |
| YSQFINFPIYVWSSK                      | 1880.1             | 2            | 5.4445 | 0.3825 |
| YSQKEDKYEEEEIKILTDK                  | 2260.5             | 3            | 6.0212 | 0.3474 |
| YSQKEDKYEEEEIKILTDKDK                | 2501.8             | 3            | 5.5037 | 0.3277 |
| YSQKEDKYEEEEIKILTDKLEAETR            | 3088.4             | 3            | 6.0357 | 0.4211 |
| YSQKEDRYEEEEIKVLSDKLEAETR            | 3088.4             | 3            | 4.4354 | 0.2261 |
| YSQLVETIR                            | 1208.4             | 2            | 3.4066 | 0.3297 |
| YSQTGNIELAVALSR                      | 1672.8             | 2            | 4.5228 | 0.4484 |
| YSQVLANGLDNK                         | 1322.4             | 2            | 4.2043 | 0.3451 |
| YSQVLANGLDNKLR                       | 2234.5             | 3            | 3.8057 | 0.3062 |
| YSQVLANGLDNKLRERLK                   | 2475.8             | 3            | 3.3531 | 0.1383 |
| YSSDVQEMILSSATADRIPIAVSGVR           | 2767.1             | 3            | 3.6109 | 0.269  |
| YSTDVSVDEVK                          | 1242.3             | 2            | 3.4436 | 0.407  |
| YSTDVSVDEVKALASLMTYK                 | 2221.5             | 2            | 5.3575 | 0.5825 |
| YSVDIPLDK                            | 1050.2             | 2            | 2.5305 | 0.2    |
| YSVDIPLDKTVVVKDVFVFRDPALK            | 2634.0             | 2            | 3.7971 | 0.3815 |
| YSVQLLTPANLLAK                       | 1531.8             | 2            | 3.9571 | 0.313  |
| YSVWIGGSILASLSTFQQMWISKQEYDESGPSIVHR | 4102.6             | 3            | 4.3235 | 0.3049 |
| YTAAPYR                              | 941.1              | 2            | 2.5487 | 0.2285 |
| YTALDKWNTNQLNSLNQAVVSK               | 2394.7             | 3            | 4.807  | 0.3954 |
| YTCHVQHEGLPEPLTLR                    | 1994.3             | 3            | 3.2634 | 0.1302 |
| YDATSKYESVMKTEPSIAEYTVR              | 2771.0             | 3            | 4.248  | 0.179  |
| YTDDWFNSHGTR                         | 1499.5             | 2            | 3.9382 | 0.4549 |
| YTDQGGEEEDYESEELQHR                  | 2572.5             | 3            | 3.4881 | 0.3187 |
| YTEFYHVPHTSDASK                      | 1782.9             | 2            | 4.8692 | 0.503  |
| YTEHKDIPLGIR                         | 1442.6             | 2            | 2.9596 | 0.1293 |
| YTELPYGREVDLK                        | 1583.8             | 2            | 3.5179 | 0.2321 |
| YTELPYGREVDLKEAVANKGPVSVGVDAR        | 3134.5             | 3            | 7.2714 | 0.5073 |
| YTEQITNEK                            | 1126.2             | 2            | 2.7959 | 0.1939 |
| YTGSHKER                             | 978.0              | 2            | 2.6151 | 0.2611 |
| YTHAANTVVYSSNK                       | 1555.7             | 2            | 3.4338 | 0.3241 |
| YTHAANTVVYSSNKIDDTIR                 | 2269.5             | 3            | 3.9983 | 0.3989 |
| YTHFLTQHYDAKPQGR                     | 1963.1             | 2            | 4.7574 | 0.35   |

| Peptide Sequence              | Peptide mass (m/z) | Charge State | Xcorr  | DelCn2 |
|-------------------------------|--------------------|--------------|--------|--------|
| YTIAALLSPYSYSTTAVVTNPK        | 2361.7             | 2            | 5.4553 | 0.5318 |
| YTIAALLSPYSYSTTAVVTNPK        | 2490.8             | 2            | 5.9887 | 0.5367 |
| YTIENPR                       | 893.0              | 1            | 2.0191 | 0.1702 |
| YTIHSQLEHLQSK                 | 1584.8             | 2            | 4.0751 | 0.3148 |
| YTIIPENLKPQMK                 | 1689.1             | 2            | 3.5504 | 0.3952 |
| YTISQEAYDQRQDTR               | 1974.1             | 2            | 3.32   | 0.1578 |
| YTKEVYVPHPR                   | 1389.6             | 2            | 3.6295 | 0.2704 |
| YTKKVPQVSTPTLVEVSR            | 2033.4             | 3            | 4.1754 | 0.2018 |
| YTLHYKTDAPLNIR                | 1705.9             | 3            | 3.6616 | 0.3054 |
| YTLNVLEDLGDGQK                | 1565.7             | 2            | 3.461  | 0.344  |
| YTLNVLEDLGDGQKANDDIIVNWVNR    | 2976.2             | 3            | 4.9501 | 0.3778 |
| YTLPLYHAMMGGSEVAQTLAK         | 2282.7             | 3            | 4.1178 | 0.3085 |
| YTLPPGVDPTQVSSSLSPGTLTVEAPMPK | 3100.5             | 3            | 6.4908 | 0.4969 |
| YTPEQVAMATVTALHR              | 1789.0             | 2            | 4.3251 | 0.4632 |
| YTPQSPTYTPSSPSYSPSSPSYPTSPK   | 2980.1             | 3            | 4.8094 | 0.3234 |
| YTPSGQAGAAASESLFVSNHA         | 2066.2             | 2            | 5.9424 | 0.5226 |
| YTPSGQAGAAASESLFVSNHAY        | 2229.3             | 2            | 6.2398 | 0.5443 |
| YTPSQQGVAFNSGAK               | 1555.7             | 2            | 3.9577 | 0.4205 |
| YTPTQQGNMQVLVITYGGDPIPK       | 2408.7             | 2            | 5.1566 | 0.4118 |
| YTPTSPSYSPSSPEYPTPTSPK        | 2275.4             | 2            | 4.4545 | 0.4331 |
| YTPVQQGPVGVNVTYGGDPIPK        | 2287.6             | 2            | 5.6191 | 0.5145 |
| YTQVGPDHNR                    | 1187.2             | 2            | 3.0889 | 0.2888 |
| YTRPGLPTFSQEVLHK              | 1874.1             | 3            | 3.2046 | 0.1273 |
| YTSIAEVQAQMEEEYLR             | 2061.3             | 2            | 2.7125 | 0.1906 |
| YTSMLLR                       | 884.1              | 1            | 2.0014 | 0.1592 |
| YTKHLNDETTSK                  | 1538.6             | 2            | 3.8318 | 0.3003 |
| YTPEDATPEPGEDPR               | 1775.8             | 2            | 3.4563 | 0.3018 |
| YTPEDATPEPGEDPRVTR            | 2132.2             | 2            | 2.903  | 0.2157 |
| YVAEIEKEKEENEK                | 1738.9             | 2            | 5.2256 | 0.3318 |
| YVAEIEKEKEENEKKK              | 1995.2             | 2            | 4.3379 | 0.3277 |
| YVALLKK                       | 835.1              | 2            | 2.4826 | 0.1275 |
| YVAQAHDKPR                    | 1185.3             | 2            | 3.3057 | 0.3907 |
| YVASYLLAALGGNSSPSAK           | 1870.1             | 2            | 5.9531 | 0.4734 |
| YVASYLLAALGGNSSPSAKDIK        | 2226.5             | 2            | 4.6672 | 0.3912 |
| YVASYVLEHLY                   | 1357.5             | 2            | 3.6455 | 0.3913 |
| YVATLGVEVHPLVFHTNR            | 2053.4             | 2            | 5.6273 | 0.5072 |

| Peptide Sequence                 | Peptide mass (m/z) | Charge State | Xcorr  | DelCn2 |
|----------------------------------|--------------------|--------------|--------|--------|
| YVAVMPPHIGDQPLTGAYTVTL DGR       | 2673.0             | 3            | 4.4629 | 0.2789 |
| YVAVMPPHIGDQPLTGAYTVTL DGRGPSR   | 3070.5             | 3            | 3.9845 | 0.411  |
| YVDEASKK                         | 940.0              | 2            | 2.5233 | 0.2815 |
| YVDEASKKEIKDILIQYDR              | 2327.6             | 3            | 5.8316 | 0.286  |
| YVDFPITDVLQMMGR                  | 1786.1             | 2            | 3.7034 | 0.3455 |
| YVDLGGSYVGPTQNR                  | 1626.8             | 2            | 4.5319 | 0.5246 |
| YVDMSVK                          | 842.0              | 1            | 1.9776 | 0.1584 |
| YVDSEGHLYTVPIR                   | 1649.8             | 2            | 3.691  | 0.3778 |
| YVDSEGHLYTVPIREQGNIYKPNNK        | 2936.2             | 3            | 4.4397 | 0.3877 |
| YVDTPFGKPSDALILGK                | 1822.1             | 2            | 4.0347 | 0.3489 |
| YVDVLNPSGTQR                     | 1349.5             | 2            | 2.8552 | 0.1169 |
| YVDVPKPGMDVADAYVTFVR             | 2243.6             | 2            | 3.6508 | 0.3926 |
| YVEAAWYPWWEQQGFFKPEYGRPNVSAANPR  | 3746.1             | 3            | 3.8676 | 0.2277 |
| YVEPIEDVPCGNIVGLVGVDQFLVK        | 2704.1             | 3            | 4.529  | 0.2932 |
| YVFDTHKR                         | 1066.2             | 2            | 2.4116 | 0.1787 |
| YVFLDPLAGAVTK                    | 1394.6             | 2            | 3.5943 | 0.3184 |
| YVFTDISYSIPHR                    | 1598.8             | 2            | 2.9712 | 0.1775 |
| YVGEKGIIDIIEMLANVNLSKDL SLLSHGGR | 3356.9             | 3            | 6.4358 | 0.5163 |
| YVGESEANIR                       | 1138.2             | 2            | 3.1132 | 0.2732 |
| YVGESEANIRK                      | 1266.4             | 2            | 2.7463 | 0.2499 |
| YVGETQPTGQIK                     | 1321.5             | 2            | 3.4582 | 0.2977 |
| YVGGQEHFAHLLILR                  | 1754.0             | 2            | 4.1974 | 0.327  |
| YVGSMVADVHR                      | 1234.4             | 2            | 3.3875 | 0.4621 |
| YVHDRFLVGPYQNTIGAAFVAK           | 2467.8             | 3            | 3.9753 | 0.1401 |
| YVKELHLQENNIR                    | 1656.9             | 2            | 4.0906 | 0.2466 |
| YVLDDSDGLGREFDGIGAVSGGGATSR      | 2672.8             | 3            | 5.2762 | 0.3505 |
| YVLEEAEQLEPR                     | 1476.6             | 2            | 3.4653 | 0.2042 |
| YVLENHPGTNSNYQMHL LK             | 2259.5             | 2            | 4.0103 | 0.3547 |
| YVLENHPGTNSNYQMHL LKK            | 2387.7             | 2            | 4.9725 | 0.3865 |
| YVLEPEISFTSDNSFAK                | 1948.1             | 2            | 4.9365 | 0.4207 |
| YVLINWVGEDVPDAR                  | 1746.9             | 2            | 4.5641 | 0.2901 |
| YVNKEIQNAVNGVK                   | 1576.8             | 3            | 4.9885 | 0.3799 |
| YVNMQDPEMDMK                     | 1501.7             | 2            | 3.5131 | 0.2304 |
| YVPGSSGSSNTLPTADPFTGAGR          | 2240.4             | 2            | 4.1207 | 0.3981 |
| YVPLDQEAYS R                     | 1341.5             | 2            | 2.8629 | 0.3466 |
| YVPVKGDHVGIVTAK                  | 1697.0             | 2            | 3.7356 | 0.2449 |

| Peptide Sequence               | Peptide mass (m/z) | Charge State | Xcorr  | DelCn2 |
|--------------------------------|--------------------|--------------|--------|--------|
| YVQELPLEADGALR                 | 1574.8             | 2            | 3.91   | 0.2595 |
| YVQKGEYR                       | 1043.2             | 2            | 2.5148 | 0.1681 |
| YVQLPADEVDTQLLQDAAR            | 2146.3             | 3            | 4.9055 | 0.2518 |
| YVQQVQVSCFNELEVCIHPDGVIPVLTFLR | 3448.0             | 3            | 4.5155 | 0.1616 |
| YVRPGGGFEPNFMFEK               | 1989.3             | 2            | 3.5479 | 0.2202 |
| YVRPGGGFVPNFQLFEK              | 1956.2             | 2            | 2.9566 | 0.2013 |
| YVSHGATGK                      | 920.0              | 1            | 2.654  | 0.3099 |
| YVSSLTEEISK                    | 1256.4             | 2            | 2.7779 | 0.1528 |
| YVSSLTEEISKR                   | 1412.6             | 2            | 3.3322 | 0.3607 |
| YVVVTGITPTPLGEGK               | 1631.9             | 2            | 4.793  | 0.4129 |
| YVWLVEQDRPLK                   | 1710.0             | 2            | 4.3714 | 0.4544 |
| YVWLVEQDRPLKCDEPILSNR          | 2738.1             | 3            | 4.3181 | 0.4004 |
| YWGVASFLQK                     | 1199.4             | 2            | 3.4436 | 0.2471 |
| YWKEHHFEGIALVEK                | 1887.1             | 2            | 2.4814 | 0.1816 |
| YWQQVIDMNDYQR                  | 1759.9             | 2            | 4.4294 | 0.3327 |
| YYAFPQMITPLVTKG                | 1730.1             | 2            | 3.5718 | 0.4451 |
| YYALCGFGGVLSCGLTHTAVVPLDLVK    | 2798.3             | 3            | 4.6698 | 0.2645 |
| YYASEIAGQTTSK                  | 1419.5             | 2            | 4.5548 | 0.4948 |
| YYDAKTEDKVR                    | 1388.5             | 2            | 2.7906 | 0.2024 |
| YYDDTYPSVKEQK                  | 1636.7             | 2            | 3.9798 | 0.3261 |
| YYDEIINALEEDPAAQKMQLAFR        | 2730.0             | 3            | 3.3605 | 0.1694 |
| YYDSRPGGYGYGYGR                | 1731.8             | 2            | 2.8518 | 0.4367 |
| YYGGAEVVDEIELLCQR              | 1958.2             | 2            | 4.7542 | 0.3837 |
| YYGGGSEGGRAPK                  | 1299.4             | 2            | 3.0407 | 0.2092 |
| YYGLQILENVIK                   | 1453.7             | 2            | 3.2882 | 0.2536 |
| YYKNIGLGFK                     | 1203.4             | 2            | 2.4092 | 0.1312 |
| YYKNIGLGFKTPK                  | 1529.8             | 3            | 4.03   | 0.3292 |
| YYKVDENGKISR                   | 1472.6             | 2            | 3.4302 | 0.3004 |
| YYKVEPLDFGGTQK                 | 1645.8             | 2            | 4.3476 | 0.2365 |
| YYLAPKIEDEEGS                  | 1514.6             | 2            | 3.034  | 0.3358 |
| YYLDSLDRIGAADYQPTEQDILR        | 2716.9             | 3            | 6.2249 | 0.2214 |
| YYLNDLDRVADPAYLPTQQDVLR        | 2740.0             | 3            | 5.351  | 0.2764 |
| YYMDLKENQR                     | 1360.5             | 2            | 2.4527 | 0.1785 |
| YYPTEDVPR                      | 1140.2             | 1            | 2.0427 | 0.2977 |
| YYQTIGNHASYYK                  | 1608.7             | 2            | 4.3391 | 0.3895 |
| YYRESADPLGAWLQDAR              | 2012.2             | 3            | 4.2852 | 0.1733 |

| Peptide Sequence    | Peptide mass ( <i>m/z</i> ) | Charge State | Xcorr  | DelCn2 |
|---------------------|-----------------------------|--------------|--------|--------|
| YYTEFPTVLDITAEDPSK  | 2090.3                      | 2            | 2.4658 | 0.1783 |
| YYTVFDRDNNR         | 1463.5                      | 2            | 2.4354 | 0.1013 |
| YYTVFDRDNNRVGFAEAAR | 2265.4                      | 3            | 3.2337 | 0.1709 |
| YYVTIIDAPGHR        | 1405.6                      | 2            | 3.5667 | 0.1425 |
| YYVTIIDAPGHRDFIK    | 1909.2                      | 2            | 5.006  | 0.3987 |
