# Supplementary material
Source: PubMed Central journal article supplement (PMC2975945)
Supplement: NIHMS240452-supplement-Supplemental_3.pdf [file NIHMS240452-supplement-Supplemental_3.pdf]

| Protein Description                                  | Molecular Weight (Da) | IPI Number    | Total Sequence Coverage (%) | Total Unique Peptides |
|------------------------------------------------------|-----------------------|---------------|-----------------------------|-----------------------|
| 1,4-alpha-glucan branching enzyme                    | 80393                 | IPI00296635.3 | 21.51                       | 11                    |
| 10 kDa heat shock protein, mitochondrial             | 10794                 | IPI00220362.4 | 89.109                      | 18                    |
| 10 kDa protein                                       | 9734                  | IPI00186338.1 | 62.791                      | 6                     |
| 101 kDa protein                                      | 101002                | IPI00291316.4 | 5.381                       | 2                     |
| 116 kDa U5 small nuclear ribonucleoprotein component | 109366                | IPI00003519.1 | 24.794                      | 14                    |
| 12 kDa protein                                       | 11796                 | IPI00414954.1 | 38.889                      | 2                     |
| 124 kDa protein                                      | 123667                | IPI00333558.3 | 10.372                      | 7                     |
| 125 kDa protein                                      | 124919                | IPI00447101.2 | 4.242                       | 3                     |
| 130 kD Golgi-localized phosphoprotein                | 81831                 | IPI00004962.1 | 10.776                      | 6                     |
| 130 kDa leucine-rich protein                         | 158826                | IPI00329745.4 | 35.378                      | 37                    |
| 132 kDa protein                                      | 131489                | IPI00243220.2 | 4.609                       | 4                     |
| 137 kDa protein                                      | 137059                | IPI00218136.2 | 19.518                      | 14                    |
| 14-3-3 protein beta/alpha                            | 27934                 | IPI00216318.4 | 69.388                      | 21                    |
| 14-3-3 protein epsilon                               | 29155                 | IPI00000816.1 | 64.314                      | 18                    |
| 14-3-3 protein eta                                   | 28070                 | IPI00216319.2 | 46.122                      | 14                    |
| 14-3-3 protein gamma                                 | 28154                 | IPI00220642.4 | 56.504                      | 14                    |
| 14-3-3 protein sigma                                 | 27757                 | IPI00013890.1 | 9.677                       | 2                     |
| 14-3-3 protein tau                                   | 27747                 | IPI00018146.1 | 45.306                      | 15                    |
| 14-3-3 protein zeta/delta                            | 27728                 | IPI00021263.3 | 71.837                      | 20                    |
| 15 kDa selenoprotein isoform 1 precursor             | 18033                 | IPI00030877.2 | 20                          | 3                     |
| 150 kDa oxygen-regulated protein precursor           | 111266                | IPI00000877.1 | 57.257                      | 49                    |
| 154 kDa protein                                      | 153869                | IPI00480157.1 | 6.576                       | 5                     |
| 175 kDa protein                                      | 174891                | IPI00328318.5 | 2.932                       | 4                     |
| 18 kDa protein                                       | 18290                 | IPI00183568.1 | 37.58                       | 6                     |
| 18 kDa protein                                       | 17747                 | IPI00304459.2 | 44.654                      | 4                     |
| 182 kDa tankyrase 1-binding protein                  | 181705                | IPI00304589.3 | 12.84                       | 16                    |
| 2,4-dienoyl-CoA reductase, mitochondrial precursor   | 36045                 | IPI00003482.1 | 42.09                       | 13                    |
| 22 kDa protein                                       | 22190                 | IPI00042578.4 | 43.367                      | 6                     |
| 23 kDa protein                                       | 22588                 | IPI00183866.1 | 54.737                      | 8                     |
| 24 kDa protein                                       | 24371                 | IPI00396452.3 | 30.047                      | 6                     |
| 26S protease regulatory subunit 4                    | 49154                 | IPI00011126.6 | 41.364                      | 14                    |
| 26S protease regulatory subunit 6A                   | 49172                 | IPI00018398.4 | 57.403                      | 19                    |
| 26S protease regulatory subunit 7                    | 48472                 | IPI00021435.2 | 56.019                      | 25                    |
| 26S protease regulatory subunit 8                    | 45597                 | IPI00023919.4 | 60.591                      | 21                    |
| 26S protease regulatory subunit S10B                 | 44145                 | IPI00021926.2 | 58.869                      | 18                    |
| 26S proteasome non-ATPase regulatory subunit 10      | 24412                 | IPI00003565.1 | 22.124                      | 4                     |
| 26S proteasome non-ATPase regulatory subunit 11      | 47303                 | IPI00105598.2 | 40.855                      | 19                    |

| Protein Description                                                   | Molecular Weight (Da) | IPI Number    | Total Sequence Coverage (%) | Total Unique Peptides |
|-----------------------------------------------------------------------|-----------------------|---------------|-----------------------------|-----------------------|
| 26S proteasome non-ATPase regulatory subunit 12                       | 52871                 | IPI00185374.2 | 24.561                      | 8                     |
| 26S proteasome non-ATPase regulatory subunit 13                       | 42891                 | IPI00099585.5 | 28.723                      | 8                     |
| 26S proteasome non-ATPase regulatory subunit 14                       | 34555                 | IPI00024821.1 | 52.258                      | 10                    |
| 26S proteasome non-ATPase regulatory subunit 2                        | 107969                | IPI00012268.2 | 29.453                      | 21                    |
| 26S proteasome non-ATPase regulatory subunit 3                        | 60939                 | IPI00011603.2 | 34.831                      | 17                    |
| 26S proteasome non-ATPase regulatory subunit 5                        | 56029                 | IPI00002134.3 | 30.219                      | 12                    |
| 26S proteasome non-ATPase regulatory subunit 6                        | 45502                 | IPI00014151.3 | 22.622                      | 9                     |
| 26S proteasome non-ATPase regulatory subunit 7                        | 37002                 | IPI00019927.2 | 26.852                      | 6                     |
| 26S proteasome non-ATPase regulatory subunit 8                        | 29986                 | IPI00010201.3 | 18.288                      | 2                     |
| 28 kDa Golgi SNARE protein                                            | 28595                 | IPI00029447.3 | 29.2                        | 3                     |
| 28 kDa heat- and acid-stable phosphoprotein                           | 20618                 | IPI00013297.1 | 40.331                      | 10                    |
| 28S ribosomal protein S18b, mitochondrial precursor                   | 29377                 | IPI00022316.3 | 6.589                       | 2                     |
| 28S ribosomal protein S26, mitochondrial precursor                    | 24197                 | IPI00006606.1 | 30.732                      | 5                     |
| 28S ribosomal protein S31, mitochondrial precursor                    | 45273                 | IPI00294242.1 | 10.127                      | 3                     |
| 29 kDa protein                                                        | 28806                 | IPI00377005.1 | 32.794                      | 11                    |
| 29 kDa protein                                                        | 29013                 | IPI00015139.3 | 15.649                      | 4                     |
| 2-deoxyribose-5-phosphate aldolase homolog                            | 36955                 | IPI00219677.3 | 14.583                      | 3                     |
| 2-hydroxyphytanoyl-CoA lyase                                          | 63687                 | IPI00296535.1 | 6.055                       | 3                     |
| 2-oxoglutarate dehydrogenase E1 component, mitochondrial precursor    | 113403                | IPI00098902.3 | 20.659                      | 11                    |
| 2-oxoisovalerate dehydrogenase alpha subunit, mitochondrial precursor | 50439                 | IPI00025100.1 | 34.831                      | 10                    |
| 2-oxoisovalerate dehydrogenase beta subunit, mitochondrial precursor  | 43095                 | IPI00011276.1 | 8.929                       | 2                     |
| 2'-phosphodiesterase                                                  | 67339                 | IPI00174390.2 | 12.151                      | 5                     |
| 30 kDa protein                                                        | 29689                 | IPI00299103.2 | 12.791                      | 2                     |
| 30 kDa protein                                                        | 29932                 | IPI00020472.1 | 5.364                       | 2                     |
| 30S ribosomal protein S7 homolog                                      | 28116                 | IPI00006440.2 | 18.182                      | 3                     |
| 33 kDa protein                                                        | 32639                 | IPI00186101.3 | 5.629                       | 2                     |
| 3'-5' RNA exonuclease                                                 | 85911                 | IPI00291165.3 | 2.937                       | 2                     |
| 39S ribosomal protein L11, mitochondrial precursor                    | 20670                 | IPI00007001.1 | 23.438                      | 3                     |
| 39S ribosomal protein L12, mitochondrial precursor                    | 21335                 | IPI00005537.2 | 66.667                      | 15                    |
| 39S ribosomal protein L13, mitochondrial                              | 20679                 | IPI00022403.1 | 22.472                      | 3                     |
| 39S ribosomal protein L28, mitochondrial precursor                    | 33842                 | IPI00172594.2 | 29.965                      | 6                     |
| 39S ribosomal protein L40, mitochondrial precursor                    | 24475                 | IPI00099871.1 | 16.019                      | 3                     |
| 39S ribosomal protein L45, mitochondrial precursor                    | 35328                 | IPI00185859.2 | 19.608                      | 3                     |
| 39S ribosomal protein L46, mitochondrial precursor                    | 31685                 | IPI00023161.1 | 17.921                      | 3                     |
| 39S ribosomal protein L47, mitochondrial precursor                    | 29559                 | IPI00030820.1 | 8.73                        | 2                     |
| 3-hydroxyisobutyrate dehydrogenase, mitochondrial precursor           | 35306                 | IPI00013860.3 | 43.452                      | 17                    |
| 3-hydroxyisobutyryl-Coenzyme A hydrolase, isoform 1                   | 43382                 | IPI00419802.1 | 29.016                      | 9                     |

| Protein Description                                       | Molecular Weight (Da) | IPI Number    | Total Sequence Coverage (%) | Total Unique Peptides |
|-----------------------------------------------------------|-----------------------|---------------|-----------------------------|-----------------------|
| 3-ketoacyl-CoA thiolase, mitochondrial                    | 41898                 | IPI00001539.8 | 67.003                      | 23                    |
| 3-ketoacyl-CoA thiolase, peroxisomal precursor            | 44264                 | IPI00012828.3 | 37.028                      | 10                    |
| 3-mercaptopyruvate sulfurtransferase                      | 33027                 | IPI00165360.4 | 37.838                      | 8                     |
| 40 kDa peptidyl-prolyl cis-trans isomerase                | 40607                 | IPI00003927.4 | 17.886                      | 3                     |
| 40S ribosomal protein S10                                 | 18886                 | IPI00008438.1 | 58.788                      | 10                    |
| 40S ribosomal protein S11                                 | 18419                 | IPI00025091.1 | 37.342                      | 10                    |
| 40S ribosomal protein S12                                 | 14505                 | IPI00414922.3 | 45.455                      | 6                     |
| 40S ribosomal protein S13                                 | 17081                 | IPI00221089.4 | 53.333                      | 11                    |
| 40S ribosomal protein S14                                 | 16131                 | IPI00026271.2 | 40.667                      | 7                     |
| 40S ribosomal protein S15                                 | 16898                 | IPI00216153.4 | 68.056                      | 9                     |
| 40S ribosomal protein S15a                                | 14699                 | IPI00221091.4 | 56.589                      | 6                     |
| 40S ribosomal protein S16                                 | 16304                 | IPI00221092.3 | 57.931                      | 13                    |
| 40S ribosomal protein S17                                 | 15409                 | IPI00221093.6 | 61.94                       | 10                    |
| 40S ribosomal protein S18                                 | 17708                 | IPI00013296.1 | 54.605                      | 14                    |
| 40S ribosomal protein S19                                 | 15919                 | IPI00215780.4 | 75.694                      | 17                    |
| 40S ribosomal protein S2                                  | 31305                 | IPI00013485.1 | 51.195                      | 17                    |
| 40S ribosomal protein S20                                 | 13364                 | IPI00012493.1 | 31.933                      | 5                     |
| 40S ribosomal protein S21                                 | 9106                  | IPI00017448.1 | 53.012                      | 5                     |
| 40S ribosomal protein S23                                 | 15667                 | IPI00218606.6 | 29.577                      | 5                     |
| 40S ribosomal protein S25                                 | 13734                 | IPI00012750.3 | 64.8                        | 16                    |
| 40S ribosomal protein S28                                 | 7836                  | IPI00012751.1 | 60.87                       | 9                     |
| 40S ribosomal protein S29                                 | 6541                  | IPI00182289.5 | 34.545                      | 2                     |
| 40S ribosomal protein S3                                  | 26671                 | IPI00011253.1 | 69.547                      | 18                    |
| 40S ribosomal protein S3a                                 | 29795                 | IPI00419880.3 | 45.247                      | 13                    |
| 40S ribosomal protein S4, X isoform                       | 29448                 | IPI00217030.5 | 63.359                      | 22                    |
| 40S ribosomal protein S5                                  | 22862                 | IPI00008433.2 | 63.725                      | 10                    |
| 40S ribosomal protein S6                                  | 28663                 | IPI00021840.1 | 36.145                      | 13                    |
| 40S ribosomal protein S7                                  | 22113                 | IPI00013415.1 | 65.464                      | 19                    |
| 40S ribosomal protein S8                                  | 24059                 | IPI00216587.4 | 47.343                      | 11                    |
| 40S ribosomal protein S9                                  | 22447                 | IPI00221088.4 | 51.813                      | 12                    |
| 45 kDa calcium-binding protein precursor                  | 41780                 | IPI00106646.1 | 46.685                      | 10                    |
| 4-aminobutyrate aminotransferase, mitochondrial precursor | 56403                 | IPI00009532.4 | 43.2                        | 13                    |
| 4F2 cell-surface antigen heavy chain                      | 57909                 | IPI00027493.1 | 43.1                        | 20                    |
| 4-trimethylaminobutyraldehyde dehydrogenase               | 53767                 | IPI00479877.3 | 26.721                      | 15                    |
| 50 kDa protein                                            | 50122                 | IPI00180730.1 | 23.16                       | 8                     |
| 50 kDa protein                                            | 49750                 | IPI00246022.3 | 11.184                      | 6                     |
| 5'-3' exoribonuclease 2                                   | 108513                | IPI00100151.3 | 11.684                      | 8                     |

| Protein Description                                      | Molecular Weight (Da) | IPI Number    | Total Sequence Coverage (%) | Total Unique Peptides |
|----------------------------------------------------------|-----------------------|---------------|-----------------------------|-----------------------|
| 54 kDa protein                                           | 53662                 | IPI00177890.2 | 6.992                       | 2                     |
| 55 kDa erythrocyte membrane protein                      | 52264                 | IPI00215610.2 | 14.592                      | 4                     |
| 5'-AMP-activated protein kinase, catalytic alpha-1 chain | 62754                 | IPI00011891.4 | 11.273                      | 5                     |
| 5-formyltetrahydrofolate cyclo-ligase                    | 23110                 | IPI00220567.4 | 15.842                      | 3                     |
| 5-oxoprolinase                                           | 137371                | IPI00418382.1 | 4.037                       | 3                     |
| 60 kDa heat shock protein, mitochondrial precursor       | 61174                 | IPI00472102.1 | 67.304                      | 49                    |
| 60S acidic ribosomal protein P0                          | 34252                 | IPI00008530.1 | 49.527                      | 16                    |
| 60S acidic ribosomal protein P1                          | 11507                 | IPI00008527.1 | 72.807                      | 3                     |
| 60S acidic ribosomal protein P2                          | 11658                 | IPI00008529.1 | 85.217                      | 13                    |
| 60S ribosomal protein L10a                               | 24684                 | IPI00412579.3 | 38.426                      | 13                    |
| 60S ribosomal protein L12                                | 17808                 | IPI00024933.3 | 52.121                      | 8                     |
| 60S ribosomal protein L13                                | 24115                 | IPI00465361.3 | 44.762                      | 18                    |
| 60S ribosomal protein L13a                               | 23431                 | IPI00304612.6 | 38.119                      | 10                    |
| 60S ribosomal protein L14                                | 23144                 | IPI00002821.3 | 36.321                      | 9                     |
| 60S ribosomal protein L15                                | 25281                 | IPI00375511.3 | 33.953                      | 7                     |
| 60S ribosomal protein L18                                | 21490                 | IPI00215719.5 | 42.246                      | 12                    |
| 60S ribosomal protein L18a                               | 20749                 | IPI00026202.1 | 24.432                      | 5                     |
| 60S ribosomal protein L19                                | 23451                 | IPI00025329.1 | 45.408                      | 15                    |
| 60S ribosomal protein L22                                | 14647                 | IPI00219153.3 | 21.26                       | 4                     |
| 60S ribosomal protein L23                                | 14856                 | IPI00010153.1 | 35                          | 6                     |
| 60S ribosomal protein L23a                               | 17684                 | IPI00021266.1 | 33.333                      | 5                     |
| 60S ribosomal protein L24                                | 17768                 | IPI00306332.4 | 42.675                      | 9                     |
| 60S ribosomal protein L26                                | 17248                 | IPI00027270.1 | 40                          | 9                     |
| 60S ribosomal protein L27                                | 15657                 | IPI00219155.2 | 48.889                      | 7                     |
| 60S ribosomal protein L28                                | 15607                 | IPI00182533.4 | 38.971                      | 9                     |
| 60S ribosomal protein L29                                | 17610                 | IPI00419919.4 | 15.823                      | 2                     |
| 60S ribosomal protein L3                                 | 45949                 | IPI00550021.3 | 45.771                      | 19                    |
| 60S ribosomal protein L30                                | 12645                 | IPI00219156.2 | 35.088                      | 3                     |
| 60S ribosomal protein L31                                | 14454                 | IPI00026302.3 | 48                          | 7                     |
| 60S ribosomal protein L34                                | 13153                 | IPI00219160.2 | 26.724                      | 3                     |
| 60S ribosomal protein L35a                               | 12530                 | IPI00029731.8 | 12.727                      | 2                     |
| 60S ribosomal protein L36                                | 12115                 | IPI00216237.4 | 23.077                      | 4                     |
| 60S ribosomal protein L36a-like                          | 12330                 | IPI00056494.4 | 10.476                      | 3                     |
| 60S ribosomal protein L37                                | 10940                 | IPI00220871.3 | 35.417                      | 4                     |
| 60S ribosomal protein L37a                               | 10137                 | IPI00414860.5 | 29.67                       | 2                     |
| 60S ribosomal protein L38                                | 8082                  | IPI00215790.5 | 57.971                      | 4                     |
| 60S ribosomal protein L4                                 | 47667                 | IPI00003918.4 | 48.712                      | 23                    |

| Protein Description                                           | Molecular Weight (Da) | IPI Number    | Total Sequence Coverage (%) | Total Unique Peptides |
|---------------------------------------------------------------|-----------------------|---------------|-----------------------------|-----------------------|
| 60S ribosomal protein L5                                      | 34295                 | IPI00000494.4 | 40.203                      | 19                    |
| 60S ribosomal protein L6                                      | 32577                 | IPI00329389.5 | 48.084                      | 20                    |
| 60S ribosomal protein L7                                      | 29207                 | IPI00030179.3 | 33.468                      | 11                    |
| 60S ribosomal protein L7a                                     | 29846                 | IPI00299573.9 | 16.981                      | 7                     |
| 60S ribosomal protein L8                                      | 27876                 | IPI00012772.5 | 40.625                      | 12                    |
| 60S ribosomal protein L9                                      | 21850                 | IPI00031691.1 | 30.208                      | 10                    |
| 65 kDa Yes-associated protein                                 | 48725                 | IPI00009326.1 | 16.74                       | 3                     |
| 67 kDa protein                                                | 67415                 | IPI00479737.1 | 5.591                       | 2                     |
| 6-phosphofructo-2-kinase/fructose-2,6-biphosphat ase 3        | 60304                 | IPI00004511.2 | 7.985                       | 4                     |
| 6-phosphofructokinase                                         | 81723                 | IPI00219585.2 | 18.024                      | 9                     |
| 6-phosphofructokinase, type C                                 | 85542                 | IPI00009790.1 | 24.235                      | 21                    |
| 6-phosphogluconate dehydrogenase, decarboxylating             | 52975                 | IPI00219525.9 | 46.473                      | 17                    |
| 6-phosphogluconolactonase                                     | 27530                 | IPI00029997.1 | 51.163                      | 11                    |
| 72 kDa protein                                                | 71754                 | IPI00258514.3 | 16.667                      | 15                    |
| 78 kDa glucose-regulated protein precursor                    | 72288                 | IPI00003362.1 | 60.55                       | 55                    |
| 80 kDa nuclear cap binding protein                            | 91781                 | IPI00019380.1 | 4.304                       | 2                     |
| 9 kDa protein                                                 | 9395                  | IPI00142830.2 | 26.744                      | 2                     |
| A kinase                                                      | 47598                 | IPI00073769.2 | 9.469                       | 3                     |
| A6 related protein                                            | 39523                 | IPI00027257.1 | 34.384                      | 6                     |
| Aac11                                                         | 59275                 | IPI00006684.1 | 33.144                      | 12                    |
| AAIR8193                                                      | 29140                 | IPI00394809.1 | 28.731                      | 5                     |
| AarF domain containing kinase 4                               | 60031                 | IPI00171777.1 | 6.066                       | 2                     |
| Acetolactate synthase                                         | 67825                 | IPI00554541.1 | 22.785                      | 9                     |
| Acetyl-CoA acetyltransferase, cytosolic                       | 41324                 | IPI00291419.5 | 36.02                       | 8                     |
| Acetyl-CoA acetyltransferase, mitochondrial precursor         | 45171                 | IPI00030363.1 | 70.726                      | 32                    |
| Acetyl-CoA carboxylase 1                                      | 264872                | IPI00011569.1 | 1.705                       | 3                     |
| Acetylserotonin O-methyltransferase-like                      | 69693                 | IPI00003119.1 | 3.18                        | 2                     |
| Acid ceramidase precursor                                     | 44621                 | IPI00013698.1 | 12.152                      | 2                     |
| Acid phosphatase 1 isoform c                                  | 18031                 | IPI00219861.1 | 33.544                      | 6                     |
| Acid phosphatase 6, lysophosphatidic                          | 48823                 | IPI00099838.2 | 8.411                       | 4                     |
| Acid sphingomyelinase-like phosphodiesterase 3b precursor     | 51896                 | IPI00021560.1 | 8.387                       | 3                     |
| Acidic leucine-rich nuclear phosphoprotein 32 family member A | 28568                 | IPI00025849.1 | 34.137                      | 9                     |
| Acidic leucine-rich nuclear phosphoprotein 32 family member B | 28770                 | IPI00007423.1 | 31.474                      | 8                     |
| Acidic leucine-rich nuclear phosphoprotein 32 family member E | 30674                 | IPI00165393.1 | 13.433                      | 4                     |
| Aconitate hydratase, mitochondrial precursor                  | 85372                 | IPI00017855.1 | 50.641                      | 39                    |
| ACSL3 protein                                                 | 80368                 | IPI00401055.1 | 17.222                      | 8                     |
| Actin, aortic smooth muscle                                   | 41982                 | IPI00008603.1 | 49.337                      | 16                    |

| Protein Description                                                            | Molecular Weight (Da) | IPI Number     | Total Sequence Coverage (%) | Total Unique Peptides |
|--------------------------------------------------------------------------------|-----------------------|----------------|-----------------------------|-----------------------|
| Actin, cytoplasmic 1                                                           | 41710                 | IPI00021439.1  | 51.467                      | 21                    |
| Actin-bundling protein with BAIAP2 homology                                    | 79880                 | IPI00418374.1  | 5.489                       | 3                     |
| Actin-like protein 2                                                           | 44732                 | IPI00005159.2  | 38.832                      | 11                    |
| Actin-like protein 3                                                           | 47341                 | IPI00028091.1  | 52.392                      | 14                    |
| Actin-like protein 6B                                                          | 46847                 | IPI00007776.1  | 3.521                       | 2                     |
| Actin-related protein 2/3 complex subunit 1A                                   | 41557                 | IPI00333068.3  | 17.568                      | 6                     |
| Actin-related protein 3-beta                                                   | 47577                 | IPI00007068.1  | 11.005                      | 4                     |
| Activated RNA polymerase II transcriptional coactivator p15                    | 14255                 | IPI00221222.4  | 34.921                      | 9                     |
| Activating signal cointegrator 1                                               | 66204                 | IPI00018840.5  | 9.639                       | 3                     |
| Activating transcription factor 2                                              | 54504                 | IPI00234446.1  | 7.525                       | 2                     |
| Activator 1 37 kDa subunit                                                     | 39657                 | IPI00017381.1  | 7.163                       | 2                     |
| Activator of 90 kDa heat shock protein ATPase homolog 1                        | 38250                 | IPI00030706.1  | 17.751                      | 4                     |
| Activity-dependent neuroprotector                                              | 123485                | IPI00022215.1  | 5.172                       | 4                     |
| Acyl carrier protein, mitochondrial precursor                                  | 17406                 | IPI00022442.2  | 11.538                      | 2                     |
| Acylamino-acid-releasing enzyme                                                | 81173                 | IPI00337741.4  | 14.617                      | 8                     |
| Acyl-CoA dehydrogenase family member 9, mitochondrial precursor                | 68717                 | IPI00152981.1  | 21.9                        | 11                    |
| Acyl-CoA dehydrogenase, medium-chain specific, mitochondrial precursor         | 46559                 | IPI00005040.1  | 58.907                      | 23                    |
| Acyl-CoA dehydrogenase, short/branched chain specific, mitochondrial precursor | 47455                 | IPI00024623.3  | 40.741                      | 13                    |
| Acyl-CoA dehydrogenase, short-chain specific, mitochondrial precursor          | 44269                 | IPI00027701.3  | 22.33                       | 7                     |
| Acyl-Coenzyme A binding domain containing 5                                    | 60054                 | IPI00186681.11 | 7.865                       | 3                     |
| Acyl-coenzyme A oxidase 3, peroxisomal                                         | 77504                 | IPI00020226.1  | 3.429                       | 2                     |
| Acylphosphatase, organ-common type isozyme                                     | 11123                 | IPI00221117.2  | 21.429                      | 2                     |
| Acyl-protein thioesterase 2                                                    | 24721                 | IPI00027032.1  | 25.541                      | 3                     |
| AD025                                                                          | 17190                 | IPI00307547.1  | 13.605                      | 2                     |
| AD033                                                                          | 38441                 | IPI00026448.1  | 27.778                      | 4                     |
| ADAM 10 precursor                                                              | 84088                 | IPI00013897.1  | 11.096                      | 5                     |
| ADAMTS-7 precursor                                                             | 109624                | IPI00007692.1  | 4.714                       | 2                     |
| Adapter-related protein complex 1 gamma 2 subunit                              | 87062                 | IPI00027178.1  | 2.42                        | 2                     |
| Adapter-related protein complex 2 alpha 2 subunit                              | 104087                | IPI00016621.5  | 21.573                      | 13                    |
| Adapter-related protein complex 3 mu 1 subunit                                 | 46909                 | IPI00032459.1  | 14.115                      | 2                     |
| Adapter-related protein complex 3 mu 2 subunit                                 | 46947                 | IPI00022883.1  | 5.981                       | 2                     |
| Adapter-related protein complex 3 sigma 1 subunit                              | 21718                 | IPI00014624.1  | 15.544                      | 2                     |
| Adapter-related protein complex 3 sigma 2 subunit                              | 22003                 | IPI00025115.1  | 13.99                       | 2                     |
| Adapter-related protein complex 1, mu 1 subunit                                | 48556                 | IPI00032516.3  | 19.858                      | 4                     |
| Adenine phosphoribosyltransferase                                              | 19464                 | IPI00218693.7  | 51.397                      | 8                     |
| Adenosine monophosphate deaminase 2                                            | 101789                | IPI00007722.2  | 10.562                      | 7                     |
| Adenosylhomocysteinase                                                         | 47554                 | IPI00012007.5  | 25.058                      | 10                    |

| Protein Description                                       | Molecular Weight (Da) | IPI Number    | Total Sequence Coverage (%) | Total Unique Peptides |
|-----------------------------------------------------------|-----------------------|---------------|-----------------------------|-----------------------|
| Adenylate kinase 2 isoform A                              | 26461                 | IPI00215901.1 | 18.828                      | 5                     |
| Adenylate kinase 2 isoform c                              | 22251                 | IPI00172460.1 | 71.287                      | 13                    |
| Adenylate kinase isoenzyme 1                              | 21607                 | IPI00018342.4 | 77.32                       | 14                    |
| Adenylate kinase isoenzyme 4, mitochondrial               | 25252                 | IPI00016568.1 | 11.659                      | 2                     |
| Adenylosuccinate synthetase 2                             | 50066                 | IPI00026833.4 | 10.088                      | 3                     |
| Adenylyl cyclase-associated protein 1                     | 51510                 | IPI00008274.3 | 70.253                      | 29                    |
| Adhesion regulating molecule 1 precursor                  | 42127                 | IPI00033030.2 | 6.634                       | 2                     |
| Adipocyte plasma membrane-associated protein              | 46451                 | IPI00031131.4 | 29.327                      | 9                     |
| Adipophilin                                               | 48045                 | IPI00293307.1 | 35.927                      | 12                    |
| Adipose most abundant gene transcript 2                   | 7850                  | IPI00020017.1 | 78.947                      | 2                     |
| ADIR1                                                     | 46169                 | IPI00301631.3 | 10.327                      | 2                     |
| ADM precursor                                             | 20408                 | IPI00017968.1 | 16.216                      | 2                     |
| ADP,ATP carrier protein, fibroblast isoform               | 32743                 | IPI00007188.4 | 49.832                      | 15                    |
| ADP,ATP carrier protein, heart/skeletal muscle isoform T1 | 32912                 | IPI00022891.2 | 8.418                       | 3                     |
| ADP,ATP carrier protein, liver isoform T2                 | 32714                 | IPI00291467.4 | 22.896                      | 6                     |
| ADPRHL2 protein                                           | 38923                 | IPI00015865.4 | 25.895                      | 5                     |
| ADP-ribosylation factor 1                                 | 20553                 | IPI00215914.2 | 35.556                      | 7                     |
| ADP-ribosylation factor 4                                 | 20367                 | IPI00215918.2 | 56.983                      | 6                     |
| ADP-ribosylation factor 5                                 | 20386                 | IPI00215919.4 | 27.933                      | 4                     |
| ADP-ribosylation factor binding protein GGA2              | 67134                 | IPI00296772.3 | 3.915                       | 2                     |
| ADP-ribosylation factor GTPase-activating protein 3       | 56893                 | IPI00299263.5 | 27.907                      | 10                    |
| ADP-ribosylation factor-like 10B                          | 21402                 | IPI00060031.3 | 23.118                      | 3                     |
| ADP-ribosylation factor-like protein 1                    | 20404                 | IPI00219518.5 | 19.337                      | 3                     |
| ADP-ribosylation factor-like protein 3                    | 20443                 | IPI00003327.1 | 46.703                      | 6                     |
| ADP-sugar pyrophosphatase                                 | 24312                 | IPI00296913.1 | 20.548                      | 5                     |
| Afamin precursor                                          | 69024                 | IPI00019943.1 | 5.843                       | 2                     |
| AFG3-like protein 2                                       | 88428                 | IPI00001091.3 | 23.588                      | 16                    |
| Aflatoxin B1 aldehyde reductase member 2                  | 39564                 | IPI00305978.4 | 27.298                      | 11                    |
| Aflatoxin B1 aldehyde reductase member 3                  | 37183                 | IPI00293721.3 | 22.961                      | 7                     |
| Agrin precursor                                           | 214749                | IPI00374563.2 | 2.396                       | 3                     |
| AH receptor-interacting protein                           | 37640                 | IPI00010460.1 | 40                          | 9                     |
| A-kinase anchor protein-like protein 8                    | 71835                 | IPI00297455.4 | 7.87                        | 2                     |
| A-kinase anchoring protein                                | 307714                | IPI00065931.1 | 2.13                        | 3                     |
| Alanyl-tRNA synthetase                                    | 106734                | IPI00027442.3 | 39.153                      | 27                    |
| Alcohol dehydrogenase                                     | 36419                 | IPI00220271.2 | 58.333                      | 17                    |
| Alcohol dehydrogenase beta chain                          | 39698                 | IPI00473031.5 | 28.342                      | 9                     |
| Alcohol dehydrogenase gamma chain                         | 39711                 | IPI00465343.2 | 18.717                      | 7                     |

| Protein Description                                            | Molecular Weight (Da) | IPI Number    | Total Sequence Coverage (%) | Total Unique Peptides |
|----------------------------------------------------------------|-----------------------|---------------|-----------------------------|-----------------------|
| Aldehyde dehydrogenase 16 family, member A1                    | 85060                 | IPI00217920.3 | 12.968                      | 8                     |
| Aldehyde dehydrogenase 1A2, isoform 2                          | 53026                 | IPI00169288.3 | 5.833                       | 2                     |
| Aldehyde dehydrogenase 1A3                                     | 56073                 | IPI00026663.2 | 14.258                      | 5                     |
| Aldehyde dehydrogenase family 7 member A1                      | 55200                 | IPI00221234.4 | 38.431                      | 13                    |
| Aldehyde dehydrogenase X, mitochondrial precursor              | 57181                 | IPI00103467.3 | 31.335                      | 12                    |
| Aldehyde dehydrogenase, mitochondrial precursor                | 56346                 | IPI00006663.1 | 41.393                      | 18                    |
| ALDH1L1 protein                                                | 55359                 | IPI00158280.3 | 5.743                       | 2                     |
| Aldo-keto reductase family 1 member B10                        | 35998                 | IPI00105407.1 | 28.797                      | 5                     |
| Aldo-keto reductase family 1 member C1                         | 36765                 | IPI00029733.1 | 15.17                       | 4                     |
| Aldo-keto reductase family 1 member C3                         | 36821                 | IPI00291483.3 | 62.229                      | 16                    |
| Aldose reductase                                               | 35699                 | IPI00413641.6 | 38.413                      | 8                     |
| ALEX1                                                          | 49150                 | IPI00009908.1 | 15.894                      | 4                     |
| Alkyldihydroxyacetonephosphate synthase, peroxisomal precursor | 72866                 | IPI00010349.1 | 13.374                      | 5                     |
| All-trans-13,14-dihydroretinol saturase                        | 66763                 | IPI00296157.5 | 7.705                       | 3                     |
| Alpha 3 type VI collagen isoform 1 precursor                   | 343457                | IPI00022200.2 | 2.298                       | 4                     |
| Alpha 3 type VI collagen isoform 3 precursor                   | 321802                | IPI00072917.2 | 25.025                      | 54                    |
| Alpha crystallin B chain                                       | 20146                 | IPI00021369.1 | 42.286                      | 6                     |
| Alpha enolase                                                  | 47008                 | IPI00465248.4 | 70.208                      | 49                    |
| Alpha-1 catenin                                                | 100009                | IPI00215948.4 | 39.625                      | 31                    |
| Alpha-1-antichymotrypsin precursor                             | 50596                 | IPI00550991.1 | 29.241                      | 13                    |
| Alpha-1-antitrypsin precursor                                  | 46707                 | IPI00553177.1 | 57.656                      | 26                    |
| Alpha-2-macroglobulin receptor-associated protein precursor    | 41441                 | IPI00026848.1 | 38.375                      | 12                    |
| Alpha-actinin 1                                                | 102993                | IPI00013508.3 | 41.592                      | 34                    |
| Alpha-actinin 4                                                | 104788                | IPI00013808.1 | 70.362                      | 62                    |
| Alpha-actinin-2 associated LIM protein                         | 34245                 | IPI00167134.2 | 35.759                      | 7                     |
| Alpha-amylase 2B precursor                                     | 57673                 | IPI00021447.1 | 7.436                       | 2                     |
| Alpha-centractin                                               | 42587                 | IPI00029468.1 | 30.319                      | 8                     |
| Alpha-internexin                                               | 55357                 | IPI00001453.2 | 22.445                      | 10                    |
| Alpha-mannosidase II                                           | 131001                | IPI00003802.1 | 9.003                       | 5                     |
| Alpha-N-acetylgalactosaminidase precursor                      | 46534                 | IPI00414909.1 | 13.625                      | 3                     |
| Alpha-N-acetylglucosaminidase precursor                        | 82115                 | IPI00008787.3 | 8.614                       | 4                     |
| Alpha-soluble NSF attachment protein                           | 33225                 | IPI00009253.1 | 36.61                       | 8                     |
| Alpha-taxilin                                                  | 61853                 | IPI00470779.2 | 25.824                      | 10                    |
| Amidophosphoribosyltransferase precursor                       | 57362                 | IPI00029534.1 | 6.383                       | 2                     |
| Amine oxidase [flavin-containing] A                            | 59644                 | IPI00008483.1 | 23.909                      | 9                     |
| Amine oxidase [flavin-containing] B                            | 58594                 | IPI00328156.8 | 22.543                      | 10                    |
| Aminoacylase-1                                                 | 45856                 | IPI00009268.1 | 8.578                       | 2                     |



| Protein Description                                      | Molecular Weight (Da) | IPI Number    | Total Sequence Coverage (%) | Total Unique Peptides |
|----------------------------------------------------------|-----------------------|---------------|-----------------------------|-----------------------|
| Aminomethyltransferase, mitochondrial precursor          | 43918                 | IPI00299300.1 | 14.392                      | 4                     |
| Aminopeptidase B                                         | 73451                 | IPI00100496.4 | 23.556                      | 12                    |
| Aminopeptidase N                                         | 109312                | IPI00221224.4 | 26.19                       | 21                    |
| Amino-terminal enhancer of split isoform c               | 21828                 | IPI00395597.1 | 14.286                      | 2                     |
| Amyloid protein-binding protein 1                        | 60209                 | IPI00018968.2 | 17.978                      | 5                     |
| ANG2                                                     | 85988                 | IPI00001710.3 | 4.859                       | 3                     |
| Angiopoietin-related protein 2 precursor                 | 57068                 | IPI00007800.1 | 8.316                       | 3                     |
| Angiotensin-converting enzyme, somatic isoform precursor | 149620                | IPI00437751.1 | 3.752                       | 2                     |
| Angiotensinogen precursor                                | 53121                 | IPI00032220.3 | 8.866                       | 2                     |
| Ankyrin repeat and FYVE domain protein 1                 | 128318                | IPI00159899.7 | 8.127                       | 5                     |
| Ankyrin repeat domain protein 13                         | 67519                 | IPI00217831.3 | 6.441                       | 2                     |
| Annexin A1                                               | 38559                 | IPI00218918.4 | 41.449                      | 12                    |
| Annexin A11                                              | 54673                 | IPI00185600.1 | 25.933                      | 12                    |
| Annexin A2                                               | 38449                 | IPI00455315.3 | 78.107                      | 49                    |
| Annexin A3                                               | 36222                 | IPI00024095.2 | 59.938                      | 20                    |
| Annexin A4                                               | 36092                 | IPI00221225.2 | 61.994                      | 30                    |
| Annexin A5                                               | 35783                 | IPI00329801.9 | 79.624                      | 31                    |
| Annexin A6                                               | 75695                 | IPI00221226.6 | 59.226                      | 33                    |
| Annexin VI isoform 2                                     | 75260                 | IPI00002459.3 | 56.522                      | 28                    |
| Antigen NY-CO-7                                          | 34769                 | IPI00025156.3 | 18.152                      | 4                     |
| AP1G1 protein                                            | 91698                 | IPI00293396.3 | 7.758                       | 4                     |
| Apical-like protein                                      | 176303                | IPI00015180.1 | 1.423                       | 2                     |
| APOBEC-1 stimulating protein                             | 65161                 | IPI00071360.1 | 6.734                       | 2                     |
| Apolipoprotein A-I binding protein                       | 31654                 | IPI00168479.2 | 30.556                      | 7                     |
| Apolipoprotein C-I precursor                             | 9326                  | IPI00021855.1 | 38.554                      | 2                     |
| Arachidonate 5-lipoxygenase                              | 77802                 | IPI00218916.2 | 4.309                       | 2                     |
| ARAP1                                                    | 136178                | IPI00181697.2 | 2.397                       | 2                     |
| Arfaptin 2                                               | 37832                 | IPI00021257.1 | 16.129                      | 3                     |
| Arginase II, mitochondrial precursor                     | 38554                 | IPI00020332.1 | 23.446                      | 5                     |
| Argininosuccinate lyase                                  | 51710                 | IPI00220267.6 | 10.56                       | 5                     |
| Argininosuccinate synthase                               | 46501                 | IPI00020632.2 | 17.233                      | 6                     |
| Arginyl-tRNA synthetase                                  | 75331                 | IPI00004860.2 | 29.697                      | 18                    |
| ARHGAP17 protein                                         | 95377                 | IPI00064767.2 | 12.145                      | 5                     |
| ARL-6 interacting protein-1                              | 23347                 | IPI00014232.1 | 19.212                      | 3                     |
| ARMCX2 protein                                           | 65643                 | IPI00006142.3 | 9.019                       | 3                     |
| ARMET protein precursor                                  | 26886                 | IPI00328748.3 | 27.35                       | 7                     |
| ARP2/3 complex 16 kDa subunit                            | 16179                 | IPI00550234.2 | 47.333                      | 6                     |

| Protein Description                                                                       | Molecular Weight (Da) | IPI Number     | Total Sequence Coverage (%) | Total Unique Peptides |
|-------------------------------------------------------------------------------------------|-----------------------|----------------|-----------------------------|-----------------------|
| ARP2/3 complex 20 kDa subunit                                                             | 20518                 | IPI00007263.2  | 42.135                      | 7                     |
| ARP2/3 complex 21 kDa subunit                                                             | 20533                 | IPI00005162.1  | 43.258                      | 5                     |
| ARP2/3 complex 34 kDa subunit                                                             | 34311                 | IPI00005161.3  | 43.333                      | 10                    |
| ARP2/3 complex 41 kDa subunit                                                             | 40792                 | IPI00005160.2  | 14.286                      | 4                     |
| Arsenical pump-driving ATPase                                                             | 38921                 | IPI00013466.2  | 21.714                      | 6                     |
| Arylamine N-acetyltransferase 1                                                           | 33877                 | IPI00298863.1  | 9.31                        | 2                     |
| Arylsulfatase A precursor                                                                 | 53758                 | IPI00329685.9  | 28.487                      | 8                     |
| Arylsulfatase E precursor                                                                 | 65640                 | IPI00020005.4  | 4.584                       | 2                     |
| Asparaginyl-tRNA synthetase, cytoplasmic                                                  | 62903                 | IPI00306960.3  | 29.015                      | 12                    |
| Aspartate aminotransferase, cytoplasmic                                                   | 46087                 | IPI00219029.2  | 57.282                      | 23                    |
| Aspartate aminotransferase, mitochondrial precursor                                       | 47445                 | IPI00018206.3  | 73.953                      | 26                    |
| Aspartyl aminopeptidase                                                                   | 53346                 | IPI00015856.2  | 35.464                      | 10                    |
| Aspartyl(Asparaginyl)beta-hydroxylase                                                     | 85837                 | IPI00294834.3  | 20.053                      | 13                    |
| Aspartyl-tRNA synthetase                                                                  | 57100                 | IPI00216951.2  | 32.934                      | 13                    |
| ATP citrate lyase isoform 2                                                               | 119695                | IPI00394838.1  | 32.814                      | 29                    |
| ATP synthase alpha chain, mitochondrial precursor                                         | 59714                 | IPI00440493.2  | 62.387                      | 47                    |
| ATP synthase B chain, mitochondrial precursor                                             | 28890                 | IPI00029133.4  | 38.672                      | 12                    |
| ATP synthase beta chain, mitochondrial precursor                                          | 56525                 | IPI00303476.1  | 84.499                      | 47                    |
| ATP synthase coupling factor 6, mitochondrial precursor                                   | 12580                 | IPI00002521.1  | 60.185                      | 12                    |
| ATP synthase delta chain, mitochondrial precursor                                         | 17479                 | IPI00024920.1  | 64.286                      | 6                     |
| ATP synthase e chain, mitochondrial                                                       | 7797                  | IPI00218848.4  | 86.765                      | 6                     |
| ATP synthase oligomycin sensitivity conferral protein, mitochondrial precursor            | 23263                 | IPI00007611.1  | 67.136                      | 17                    |
| ATP synthase, H <sup>+</sup> transporting, mitochondrial F0 complex, subunit d isoform a  | 18479                 | IPI00220487.3  | 79.503                      | 15                    |
| ATP synthase, H <sup>+</sup> transporting, mitochondrial F0 complex, subunit f isoform 2b | 10356                 | IPI00219291.2  | 27.273                      | 2                     |
| ATP6V1F protein                                                                           | 13362                 | IPI00419255.1  | 63.866                      | 6                     |
| ATPase family, AAA domain containing 3A                                                   | 71325                 | IPI00295992.2  | 22.713                      | 11                    |
| ATPase inhibitor, mitochondrial precursor                                                 | 12241                 | IPI00006328.3  | 21.698                      | 2                     |
| ATP-binding cassette sub-family E member 1                                                | 67271                 | IPI00303207.3  | 23.038                      | 9                     |
| ATP-binding cassette, sub-family B, member 7, mitochondrial precursor                     | 82589                 | IPI00306748.1  | 2.66                        | 2                     |
| ATP-binding cassette, sub-family D, member 3                                              | 75428                 | IPI00002372.1  | 13.961                      | 8                     |
| ATP-binding cassette, sub-family F, member 2                                              | 71245                 | IPI00005045.1  | 5.778                       | 3                     |
| ATP-citrate synthase                                                                      | 120748                | IPI00021290.4  | 38.601                      | 29                    |
| ATP-dependent Clp protease ATP-binding subunit ClpX-like, mitochondrial precursor         | 69181                 | IPI00008728.1  | 9.795                       | 4                     |
| ATP-dependent DNA helicase II, 70 kDa subunit                                             | 69668                 | IPI00465430.3  | 67.763                      | 50                    |
| ATP-dependent DNA helicase II, 80 kDa subunit                                             | 82521                 | IPI00220834.7  | 56.088                      | 36                    |
| ATP-dependent DNA helicase Q1                                                             | 73409                 | IPI00178431.11 | 3.698                       | 2                     |

| Protein Description                                                            | Molecular Weight (Da) | IPI Number    | Total Sequence Coverage (%) | Total Unique Peptides |
|--------------------------------------------------------------------------------|-----------------------|---------------|-----------------------------|-----------------------|
| ATP-dependent helicase DDX1                                                    | 82380                 | IPI00293655.3 | 40.405                      | 23                    |
| ATP-dependent RNA helicase A                                                   | 140788                | IPI00215638.2 | 27.717                      | 26                    |
| ATP-dependent RNA helicase DDX19                                               | 53893                 | IPI00008943.3 | 14.196                      | 6                     |
| ATP-dependent RNA helicase DDX24                                               | 96271                 | IPI00006987.1 | 11.758                      | 6                     |
| Autoantigen RCD8                                                               | 151567                | IPI00376317.3 | 10.778                      | 9                     |
| Autocrine motility factor receptor, isoform 2                                  | 72949                 | IPI00423874.1 | 5.91                        | 2                     |
| B lymphocyte activation-related protein                                        | 40553                 | IPI00152896.1 | 11.173                      | 3                     |
| B/K protein                                                                    | 53815                 | IPI00305536.3 | 6.329                       | 2                     |
| BAG-family molecular chaperone regulator-2                                     | 23757                 | IPI00000643.1 | 26.066                      | 3                     |
| BAG-family molecular chaperone regulator-3                                     | 61557                 | IPI00000644.3 | 19.304                      | 6                     |
| BAG-family molecular chaperone regulator-5                                     | 51168                 | IPI00007731.1 | 11.633                      | 4                     |
| Band 4.1-like protein 1                                                        | 98442                 | IPI00024062.1 | 13.734                      | 8                     |
| Band 4.1-like protein 2                                                        | 112519                | IPI00015973.1 | 15.224                      | 10                    |
| Basement membrane-specific heparan sulfate proteoglycan core protein precursor | 468528                | IPI00024284.4 | 3.302                       | 11                    |
| Basic leucine zipper and W2 domains 1                                          | 40620                 | IPI00180128.2 | 12.429                      | 2                     |
| BAT2 protein                                                                   | 228667                | IPI00376933.2 | 5.471                       | 5                     |
| BAT3                                                                           | 130120                | IPI00082831.3 | 7.73                        | 6                     |
| Bax epsilon                                                                    | 18117                 | IPI00071059.3 | 35.366                      | 4                     |
| BB1 protein                                                                    | 38139                 | IPI00019068.1 | 4.971                       | 2                     |
| BC022357 protein                                                               | 8664                  | IPI00152342.3 | 17.105                      | 2                     |
| BC-2 protein                                                                   | 25088                 | IPI00004416.1 | 13.514                      | 3                     |
| B-cell receptor-associated protein 31                                          | 27843                 | IPI00218200.6 | 42.449                      | 17                    |
| B-cell receptor-associated protein BAP37                                       | 33276                 | IPI00027252.6 | 62.207                      | 20                    |
| BCSC-1 isoform c/f                                                             | 86434                 | IPI00005609.2 | 19.466                      | 11                    |
| Beta enolase                                                                   | 46826                 | IPI00218474.4 | 28.176                      | 9                     |
| Beta tubulin                                                                   | 49875                 | IPI00013475.1 | 3.596                       | 2                     |
| Beta-1,4-galactosyltransferase 4                                               | 40016                 | IPI00030128.1 | 12.791                      | 3                     |
| Beta-2-microglobulin precursor                                                 | 13706                 | IPI00004656.1 | 52.101                      | 6                     |
| Beta-centractin                                                                | 42267                 | IPI00029469.1 | 48.67                       | 11                    |
| Beta-galactosidase precursor                                                   | 76043                 | IPI00441344.1 | 22.747                      | 12                    |
| Beta-hexosaminidase alpha chain precursor                                      | 60650                 | IPI00027851.1 | 18.336                      | 8                     |
| Beta-hexosaminidase beta chain precursor                                       | 63071                 | IPI00012585.1 | 35.072                      | 16                    |
| Beta-spectrin 2 isoform 2                                                      | 251263                | IPI00333015.3 | 29.884                      | 45                    |
| Beta-synuclein                                                                 | 14279                 | IPI00032904.1 | 28.358                      | 2                     |
| Beta-tubulin cofactor E                                                        | 59309                 | IPI00018402.1 | 4.364                       | 2                     |
| BH3 interacting domain death agonist                                           | 21981                 | IPI00413587.2 | 26.667                      | 3                     |

| Protein Description                                             | Molecular Weight (Da) | IPI Number    | Total Sequence Coverage (%) | Total Unique Peptides |
|-----------------------------------------------------------------|-----------------------|---------------|-----------------------------|-----------------------|
| Bifunctional 3'-phosphoadenosine 5'-phosphosulfate synthetase 1 | 70788                 | IPI00011619.4 | 8.974                       | 4                     |
| Bifunctional coenzyme A synthase                                | 62290                 | IPI00184821.1 | 19.504                      | 9                     |
| Bifunctional polynucleotide phosphatase/kinase                  | 57040                 | IPI00290684.3 | 8.829                       | 4                     |
| Bifunctional purine biosynthesis protein PURH                   | 64575                 | IPI00289499.3 | 55.405                      | 22                    |
| Biglycan precursor                                              | 41628                 | IPI00010790.1 | 21.196                      | 6                     |
| Biliverdin reductase A precursor                                | 33407                 | IPI00294158.1 | 14.865                      | 4                     |
| Bis                                                             | 16717                 | IPI00028095.2 | 36.986                      | 3                     |
| Bleomycin hydrolase                                             | 52528                 | IPI00219575.5 | 18.462                      | 6                     |
| Blood plasma glutamate carboxypeptidase precursor               | 59893                 | IPI00005794.1 | 14.603                      | 6                     |
| BNIPXL-alpha                                                    | 85700                 | IPI00004557.6 | 7.282                       | 2                     |
| BolA-like protein CGI-143                                       | 14280                 | IPI00032900.1 | 39.416                      | 2                     |
| BPY2IP1 protein                                                 | 112158                | IPI00296485.2 | 9.726                       | 5                     |
| Brain acid soluble protein 1                                    | 22549                 | IPI00299024.8 | 35.841                      | 4                     |
| Brain protein 44                                                | 14270                 | IPI00022832.1 | 18.898                      | 2                     |
| Brain-specific polypeptide PEP-19                               | 6656                  | IPI00010148.3 | 44.262                      | 3                     |
| Breakpoint cluster region protein                               | 142717                | IPI00004497.1 | 1.574                       | 2                     |
| Brefeldin A-inhibited guanine nucleotide-exchange protein 1     | 208576                | IPI00002188.1 | 3.948                       | 7                     |
| Brefeldin A-inhibited guanine nucleotide-exchange protein 2     | 201964                | IPI00002186.3 | 7.675                       | 6                     |
| Bruno-like 6, RNA binding protein                               | 50447                 | IPI00171103.3 | 8.732                       | 3                     |
| C13orf9 protein                                                 | 43789                 | IPI00328932.5 | 7.772                       | 2                     |
| C14orf124 protein                                               | 31119                 | IPI00186534.1 | 24.915                      | 5                     |
| C14orf173 protein                                               | 55220                 | IPI00008339.2 | 10.63                       | 3                     |
| C1-tetrahydrofolate synthase                                    | 105724                | IPI00291646.2 | 3.681                       | 4                     |
| C-1-tetrahydrofolate synthase, cytoplasmic                      | 101364                | IPI00218342.9 | 26.231                      | 21                    |
| C359F1.1                                                        | 30758                 | IPI00010190.3 | 7.877                       | 2                     |
| C3orf1 protein                                                  | 32157                 | IPI00299387.2 | 7.368                       | 2                     |
| C3orf6 protein                                                  | 56305                 | IPI00217059.5 | 10.581                      | 3                     |
| C6orf125 protein                                                | 14865                 | IPI00031617.3 | 19.841                      | 2                     |
| C9orf10 protein                                                 | 121811                | IPI00396057.1 | 14.937                      | 12                    |
| Ca                                                              | 49800                 | IPI00291412.1 | 14.978                      | 4                     |
| Ca <sup>2+</sup> -dependent secretion activator isoform 1       | 152690                | IPI00297412.2 | 23.282                      | 19                    |
| CAAX prenyl protease 1 homolog                                  | 54778                 | IPI00027180.1 | 18.105                      | 5                     |
| CAD protein                                                     | 242829                | IPI00301263.2 | 5.034                       | 5                     |
| Calcium and integrin-binding protein 1                          | 21573                 | IPI00018451.4 | 15.263                      | 2                     |
| Calcium channel, alpha 2/delta subunit 2                        | 129794                | IPI00410600.1 | 4.174                       | 5                     |
| Calcium-binding mitochondrial carrier protein Aralar1           | 74709                 | IPI00386271.3 | 22.714                      | 9                     |
| Calcium-binding mitochondrial carrier protein Aralar2           | 74129                 | IPI00007084.1 | 35.407                      | 14                    |

| Protein Description                                             | Molecular Weight (Da) | IPI Number    | Total Sequence Coverage (%) | Total Unique Peptides |
|-----------------------------------------------------------------|-----------------------|---------------|-----------------------------|-----------------------|
| Calcium-binding protein p22                                     | 22311                 | IPI00218924.2 | 34.021                      | 4                     |
| Calcium-regulated heat stable protein 1                         | 15882                 | IPI00304409.3 | 49.66                       | 5                     |
| Calcyclin                                                       | 10173                 | IPI00027463.1 | 64.444                      | 7                     |
| CalCyphosine isoform b                                          | 17759                 | IPI00103067.1 | 23.457                      | 3                     |
| Calgizzarin                                                     | 11733                 | IPI00013895.1 | 27.619                      | 3                     |
| Calmeglin precursor                                             | 69994                 | IPI00024776.1 | 6.885                       | 3                     |
| Calmin                                                          | 111582                | IPI00101942.1 | 10.08                       | 6                     |
| Calmodulin                                                      | 16827                 | IPI00075248.5 | 49.664                      | 4                     |
| Calnexin precursor                                              | 67526                 | IPI00020984.1 | 66.385                      | 41                    |
| Calpactin I light chain                                         | 11064                 | IPI00183695.6 | 58.333                      | 6                     |
| Calpain 1, large [catalytic] subunit                            | 81838                 | IPI00011285.1 | 21.989                      | 12                    |
| Calpain 2, large [catalytic] subunit precursor                  | 79828                 | IPI00289758.5 | 27.325                      | 11                    |
| Calponin-2                                                      | 33544                 | IPI00015262.9 | 13.961                      | 3                     |
| Calponin-3                                                      | 36391                 | IPI00216682.5 | 32.523                      | 6                     |
| Calreticulin precursor                                          | 48112                 | IPI00020599.1 | 84.412                      | 31                    |
| CAMK2D protein                                                  | 54093                 | IPI00172636.3 | 33.054                      | 11                    |
| CAMP-dependent protein kinase Catalytic subunit alpha isoform 1 | 40564                 | IPI00396630.2 | 14.245                      | 7                     |
| CAMP-dependent protein kinase catalytic subunit beta, isoform 3 | 29677                 | IPI00414365.1 | 9.728                       | 2                     |
| cAMP-dependent protein kinase type I-alpha regulatory subunit   | 42955                 | IPI00021831.1 | 6.299                       | 2                     |
| CAMP-dependent protein kinase, regulatory subunit beta 2        | 46319                 | IPI00456775.1 | 21.292                      | 7                     |
| cAMP-regulated phosphoprotein 19                                | 12184                 | IPI00328526.4 | 23.423                      | 2                     |
| Candidate tumor suppressor protein NOC2                         | 34442                 | IPI00012958.1 | 14.286                      | 3                     |
| Capicua protein                                                 | 163689                | IPI00045360.1 | 2.736                       | 2                     |
| Capping protein (Actin filament) muscle Z-line, beta            | 33760                 | IPI00218782.2 | 40.532                      | 15                    |
| Carbohydrate kinase-like protein                                | 51471                 | IPI00005914.3 | 16.736                      | 5                     |
| Carbonic anhydrase II                                           | 29097                 | IPI00218414.4 | 57.143                      | 14                    |
| Carbonic reductase 4                                            | 25285                 | IPI00384297.1 | 19.831                      | 3                     |
| Carbonyl reductase [NADPH] 1                                    | 30225                 | IPI00295386.6 | 50.362                      | 13                    |
| Carbonyl reductase [NADPH] 3                                    | 30700                 | IPI00290462.4 | 16.667                      | 3                     |
| Carboxyl ester lipase                                           | 79617                 | IPI00099670.2 | 21.032                      | 9                     |
| Carboxylesterase 2 isoform 1                                    | 68855                 | IPI00332828.1 | 7.384                       | 2                     |
| Carboxypeptidase A1 precursor                                   | 47111                 | IPI00009823.3 | 40.334                      | 13                    |
| Carboxypeptidase A2 (panCreatiC)                                | 46811                 | IPI00296930.3 | 31.415                      | 7                     |
| Carboxypeptidase B precursor                                    | 47338                 | IPI00009826.2 | 24.7                        | 7                     |
| Carboxypeptidase D precursor                                    | 152819                | IPI00027078.2 | 13.188                      | 10                    |
| Carboxypeptidase E precursor                                    | 53117                 | IPI00031121.1 | 57.773                      | 26                    |
| Carnitine O-palmitoyltransferase II, mitochondrial precursor    | 73730                 | IPI00012912.1 | 29.027                      | 19                    |

| Protein Description                                       | Molecular Weight (Da) | IPI Number    | Total Sequence Coverage (%) | Total Unique Peptides |
|-----------------------------------------------------------|-----------------------|---------------|-----------------------------|-----------------------|
| Casein kinase II beta subunit                             | 24926                 | IPI00010865.1 | 28.837                      | 3                     |
| Casein kinase II, alpha' chain                            | 41187                 | IPI00020602.1 | 15.429                      | 4                     |
| CASP                                                      | 77374                 | IPI00071696.1 | 18.437                      | 6                     |
| Catalase                                                  | 59588                 | IPI00465436.3 | 36.882                      | 14                    |
| Catechol O-methyltransferase                              | 30018                 | IPI00011284.1 | 45.018                      | 9                     |
| Cathepsin B precursor                                     | 37783                 | IPI00295741.3 | 31.563                      | 8                     |
| Cathepsin D precursor                                     | 44524                 | IPI00011229.1 | 51.456                      | 24                    |
| Cathepsin H precursor                                     | 37353                 | IPI00297487.1 | 28.06                       | 4                     |
| Cathepsin S precursor                                     | 37485                 | IPI00299150.3 | 12.991                      | 4                     |
| Cathepsin Z precursor                                     | 33846                 | IPI00002745.1 | 16.172                      | 4                     |
| Cation-dependent mannose-6-phosphate receptor precursor   | 30973                 | IPI00025049.1 | 20.939                      | 5                     |
| Cation-independent mannose-6-phosphate receptor precursor | 274100                | IPI00289819.4 | 3.774                       | 6                     |
| Caveolin-1                                                | 20327                 | IPI00009236.4 | 30.508                      | 4                     |
| CC3                                                       | 27067                 | IPI00289733.1 | 17.355                      | 4                     |
| CCDC12 protein                                            | 19169                 | IPI00550173.2 | 42.169                      | 4                     |
| CCR4-NOT transcription complex, subunit 1 isoform a       | 266768                | IPI00166010.4 | 3.746                       | 5                     |
| CD166 antigen precursor                                   | 65091                 | IPI00015102.1 | 30.703                      | 15                    |
| CD2 antigen cytoplasmic tail-binding protein 2            | 37623                 | IPI00006103.1 | 6.158                       | 2                     |
| CD2-associated protein                                    | 71407                 | IPI00412771.1 | 40.219                      | 20                    |
| CD59 glycoprotein precursor                               | 14168                 | IPI00011302.1 | 25.781                      | 4                     |
| CD63 antigen                                              | 25488                 | IPI00215998.4 | 5.063                       | 2                     |
| CD81 antigen                                              | 25792                 | IPI00000190.1 | 18.22                       | 2                     |
| CDA02                                                     | 67809                 | IPI00012462.1 | 19.869                      | 7                     |
| CDC42 binding protein kinase alpha                        | 185996                | IPI00293173.2 | 3.236                       | 3                     |
| Cdc42-interacting protein 4                               | 62553                 | IPI00018804.2 | 25.688                      | 9                     |
| CDEP                                                      | 118559                | IPI00024773.1 | 3.158                       | 2                     |
| Cell death-regulatory protein GRIM19                      | 25848                 | IPI00219685.3 | 27.753                      | 5                     |
| Cell division protein kinase 5                            | 33335                 | IPI00023530.4 | 6.122                       | 2                     |
| Cell division protein kinase 6                            | 36915                 | IPI00023529.1 | 10.429                      | 3                     |
| Centrin 2                                                 | 19726                 | IPI00215928.4 | 50                          | 5                     |
| Centromere/kinetochore protein zw10 homolog               | 88642                 | IPI00011631.5 | 2.956                       | 2                     |
| Cerebral protein-1                                        | 50683                 | IPI00304932.2 | 7.237                       | 2                     |
| Cerebral protein-10                                       | 52038                 | IPI00410079.1 | 14.043                      | 3                     |
| Ceroid-lipofuscinosis neuronal protein 5                  | 46309                 | IPI00026050.1 | 5.405                       | 2                     |
| Ceruloplasmin precursor                                   | 122128                | IPI00017601.1 | 4.789                       | 3                     |
| CGI-111 protein                                           | 22074                 | IPI00304082.4 | 27.638                      | 4                     |
| CGI-14 protein                                            | 46884                 | IPI00103028.1 | 14.579                      | 3                     |

| Protein Description                                             | Molecular Weight (Da) | IPI Number    | Total Sequence Coverage (%) | Total Unique Peptides |
|-----------------------------------------------------------------|-----------------------|---------------|-----------------------------|-----------------------|
| CGI-142 protein                                                 | 22606                 | IPI00007063.5 | 30.049                      | 5                     |
| CGI-150 protein                                                 | 54977                 | IPI00007102.1 | 32.143                      | 12                    |
| CGI-151 protein                                                 | 44976                 | IPI00383645.2 | 18.564                      | 6                     |
| CGI-25 protein                                                  | 33151                 | IPI00006408.3 | 8.638                       | 2                     |
| CGI-29 protein                                                  | 27094                 | IPI00328196.2 | 11.157                      | 3                     |
| CGI-62 protein                                                  | 35040                 | IPI00329753.1 | 7.692                       | 2                     |
| CGI-90 protein                                                  | 35785                 | IPI00329696.1 | 23.567                      | 5                     |
| Chaperone-activity of bc1 complex-like, mitochondrial precursor | 71904                 | IPI00176469.1 | 6.801                       | 2                     |
| Chaperonin containing TCP1, subunit 3                           | 60495                 | IPI00290770.2 | 55.413                      | 26                    |
| CHC1 protein                                                    | 48115                 | IPI00001661.2 | 19.248                      | 5                     |
| CHCHD2 protein                                                  | 15545                 | IPI00007673.3 | 18.543                      | 2                     |
| CHCHD6 protein                                                  | 26441                 | IPI00031622.3 | 28.085                      | 6                     |
| Chloride intracellular channel protein 1                        | 26775                 | IPI00010896.2 | 53.333                      | 13                    |
| Chloride intracellular channel protein 4                        | 28754                 | IPI00001960.2 | 45.85                       | 7                     |
| Choline dehydrogenase, mitochondrial precursor                  | 65360                 | IPI00168603.1 | 16.835                      | 7                     |
| Choline/ethanolamine kinase                                     | 45243                 | IPI00031758.1 | 7.089                       | 2                     |
| Choline-phosphate cytidylyltransferase A                        | 41706                 | IPI00329338.2 | 8.992                       | 2                     |
| Chromatin assembly factor 1 subunit C                           | 47495                 | IPI00328319.7 | 37.5                        | 7                     |
| Chromobox protein homolog 1                                     | 21405                 | IPI00010320.1 | 34.054                      | 5                     |
| Chromobox protein homolog 3                                     | 20810                 | IPI00297579.3 | 23.497                      | 7                     |
| Chromobox protein homolog 5                                     | 22211                 | IPI00024662.1 | 24.084                      | 4                     |
| Chromodomain-helicase-DNA-binding protein 2                     | 200438                | IPI00023109.1 | 1.208                       | 2                     |
| Chromogranin A precursor                                        | 50700                 | IPI00290315.3 | 36.761                      | 15                    |
| Chromosome 1 open reading frame 50                              | 21893                 | IPI00012198.1 | 27.638                      | 2                     |
| Chromosome 10 open reading frame 42                             | 39842                 | IPI00171573.1 | 10.256                      | 3                     |
| Chromosome 10 open reading frame 65                             | 35226                 | IPI00329210.1 | 31.498                      | 4                     |
| Chromosome 17 open reading frame 28                             | 88944                 | IPI00246827.3 | 11.252                      | 4                     |
| Chromosome 6 open reading frame 209                             | 61335                 | IPI00020007.2 | 4.444                       | 2                     |
| Chromosome 9 open reading frame 5                               | 100895                | IPI00012429.1 | 2.525                       | 2                     |
| Chromosome X open reading frame 26                              | 26041                 | IPI00107104.1 | 14.592                      | 3                     |
| CH-TOG protein                                                  | 225366                | IPI00028275.1 | 7.825                       | 10                    |
| Chymotrypsinogen B precursor                                    | 27852                 | IPI00015133.1 | 31.939                      | 4                     |
| Ciliary rootlet coiled-coil, rootletin                          | 228388                | IPI00456492.2 | 2.578                       | 3                     |
| Citrate lyase beta like                                         | 33388                 | IPI00477957.1 | 15.686                      | 3                     |
| Citrate synthase, mitochondrial precursor                       | 51680                 | IPI00025366.4 | 44.421                      | 12                    |
| Class III alCohol dehydrogenase 5 Chi subunit                   | 39712                 | IPI00218446.5 | 29.947                      | 10                    |
| Class IVb beta tubulin                                          | 49721                 | IPI00549172.2 | 15.506                      | 6                     |

| Protein Description                                                             | Molecular Weight (Da) | IPI Number    | Total Sequence Coverage (%) | Total Unique Peptides |
|---------------------------------------------------------------------------------|-----------------------|---------------|-----------------------------|-----------------------|
| Clathrin coat assembly protein AP50                                             | 49623                 | IPI00022256.1 | 10.805                      | 4                     |
| Clathrin heavy Chain 1                                                          | 191493                | IPI00024067.1 | 44.119                      | 61                    |
| Cleavage and polyadenylation specificity factor, 100 kDa subunit                | 88431                 | IPI00419531.2 | 5.243                       | 2                     |
| Cleavage and polyadenylation specificity factor, 160 kDa subunit                | 160782                | IPI00026219.4 | 3.604                       | 3                     |
| Cleavage and polyadenylation specificity factor, 73 kDa subunit                 | 77436                 | IPI00007818.3 | 3.947                       | 2                     |
| Cleavage stimulation factor 77kDa subunit                                       | 82869                 | IPI00015195.1 | 10.739                      | 4                     |
| Cleavage stimulation factor, 3' pre-RNA, subunit 2, 64kDa, tau variant          | 64424                 | IPI00297493.3 | 11.688                      | 4                     |
| Cleavage stimulation factor, 50 kDa subunit                                     | 48327                 | IPI00011528.1 | 7.657                       | 2                     |
| Cleavage stimulation factor, 64 kDa subunit                                     | 60920                 | IPI00013256.1 | 9.879                       | 2                     |
| CLIP-associating protein 2                                                      | 164784                | IPI00024382.4 | 2.855                       | 3                     |
| Clusterin precursor                                                             | 52461                 | IPI00291262.3 | 45.88                       | 26                    |
| C-myc binding protein                                                           | 11959                 | IPI00549984.3 | 30.097                      | 2                     |
| Coactivator-associated arginine methyltransferase 1                             | 65811                 | IPI00412880.1 | 9.704                       | 3                     |
| Coactosin-like protein                                                          | 15935                 | IPI00017704.1 | 48.592                      | 8                     |
| Coatomer beta subunit                                                           | 107071                | IPI00295851.3 | 25.813                      | 19                    |
| Coatomer beta' subunit                                                          | 102291                | IPI00220219.5 | 28.066                      | 15                    |
| Coatomer epsilon subunit                                                        | 34329                 | IPI00465132.3 | 61.564                      | 12                    |
| Coatomer gamma subunit                                                          | 97753                 | IPI00001890.5 | 33.257                      | 24                    |
| Coatomer gamma-2 subunit                                                        | 97560                 | IPI00002557.1 | 14.466                      | 8                     |
| Coatomer zeta-1 subunit                                                         | 20185                 | IPI00032851.1 | 54.802                      | 6                     |
| Cob                                                                             | 27371                 | IPI00029665.8 | 33.2                        | 5                     |
| Cofilin, non-muscle isoform                                                     | 18360                 | IPI00012011.3 | 51.515                      | 13                    |
| Coiled-coil domain containing 6                                                 | 53262                 | IPI00477674.1 | 32.278                      | 10                    |
| Coiled-coil domain containing protein 9                                         | 59667                 | IPI00177642.8 | 4.331                       | 2                     |
| Collagen alpha 1(I) chain precursor                                             | 138799                | IPI00297646.1 | 4.03                        | 5                     |
| Collagen alpha 1(III) chain precursor                                           | 138470                | IPI00021033.1 | 1.91                        | 2                     |
| Collagen alpha 1(VI) chain precursor                                            | 108480                | IPI00291136.3 | 16.051                      | 16                    |
| Collagen triple helix repeat containing protein                                 | 132096                | IPI00478815.1 | 2.181                       | 2                     |
| Collagen-binding protein 2 precursor                                            | 46411                 | IPI00032140.2 | 55.263                      | 19                    |
| COMM domain containing protein 2                                                | 22731                 | IPI00456048.1 | 18.593                      | 2                     |
| Complement C3 precursor                                                         | 187046                | IPI00164623.3 | 13.951                      | 15                    |
| Complement C4 precursor                                                         | 192650                | IPI00032258.4 | 9.117                       | 10                    |
| Complement component 1, Q subcomponent binding protein, mitochondrial precursor | 31343                 | IPI00014230.1 | 34.397                      | 8                     |
| Complex I intermediate-associated protein 30, mitochondrial precursor           | 37740                 | IPI00032560.2 | 11.927                      | 3                     |
| Complexin 2                                                                     | 15385                 | IPI00012759.1 | 17.91                       | 2                     |
| Conserved hypothetical protein                                                  | 71024                 | IPI00171749.2 | 15.92                       | 7                     |



| Protein Description                                                               | Molecular Weight (Da) | IPI Number    | Total Sequence Coverage (%) | Total Unique Peptides |
|-----------------------------------------------------------------------------------|-----------------------|---------------|-----------------------------|-----------------------|
| Conserved oligomeric Golgi complex component 1                                    | 108909                | IPI00141561.3 | 12.347                      | 6                     |
| Conserved oligomeric Golgi complex component 2                                    | 83155                 | IPI00000057.1 | 4.065                       | 2                     |
| Conserved oligomeric Golgi complex component 5                                    | 92661                 | IPI00007347.4 | 9.297                       | 5                     |
| Conserved oligomeric Golgi complex component 7                                    | 86289                 | IPI00164005.1 | 8.701                       | 4                     |
| COP9 signalosome complex subunit 3                                                | 47842                 | IPI00025721.1 | 30.496                      | 7                     |
| COP9 signalosome complex subunit 4                                                | 46240                 | IPI00171844.3 | 33.99                       | 10                    |
| COP9 signalosome complex subunit 5                                                | 37555                 | IPI00009958.4 | 7.485                       | 3                     |
| COP9 signalosome complex subunit 6                                                | 36140                 | IPI00163230.5 | 19.572                      | 4                     |
| COP9 signalosome complex subunit 7a                                               | 30258                 | IPI00301419.2 | 28                          | 6                     |
| COP9 signalosome complex subunit 8                                                | 23211                 | IPI00009480.1 | 30.144                      | 4                     |
| COPA protein                                                                      | 139235                | IPI00295857.5 | 36.253                      | 40                    |
| Cop-coated vesicle membrane protein p24 precursor                                 | 22746                 | IPI00016608.1 | 18.408                      | 2                     |
| Copine I                                                                          | 59022                 | IPI00018452.1 | 18.808                      | 8                     |
| Copine II                                                                         | 61151                 | IPI00220526.2 | 5.474                       | 2                     |
| Copine III                                                                        | 60092                 | IPI00024403.1 | 19.553                      | 9                     |
| Copper transport protein ATOX1                                                    | 7397                  | IPI00010863.3 | 50                          | 2                     |
| Coproporphyrinogen III oxidase, mitochondrial precursor                           | 50143                 | IPI00093057.5 | 15.198                      | 4                     |
| COQ7 protein                                                                      | 24262                 | IPI00172627.3 | 23.963                      | 4                     |
| Core histone macro-H2A.2                                                          | 39902                 | IPI00220994.2 | 35.849                      | 13                    |
| Core1 UDP-galactose:N-acetylgalactosamine-alpha-R beta 1,3- galactosyltransferase | 42176                 | IPI00024566.1 | 8.54                        | 2                     |
| Coronin 7                                                                         | 100512                | IPI00027996.1 | 21.297                      | 12                    |
| Coronin-1B                                                                        | 54200                 | IPI00007058.1 | 25.767                      | 8                     |
| Coronin-1C                                                                        | 53215                 | IPI00008453.3 | 32.068                      | 11                    |
| Corticoliberin precursor                                                          | 21408                 | IPI00027839.1 | 6.633                       | 2                     |
| Creatine kinase, B chain                                                          | 42617                 | IPI00022977.1 | 62.73                       | 19                    |
| Creatine kinase, sarcomeric mitochondrial precursor                               | 47490                 | IPI00015141.3 | 5.728                       | 2                     |
| CRK-associated substrate                                                          | 93304                 | IPI00011998.1 | 3.908                       | 3                     |
| Crk-like protein                                                                  | 33756                 | IPI00004839.1 | 14.521                      | 3                     |
| CRM1 protein                                                                      | 123306                | IPI00298961.3 | 10.364                      | 6                     |
| Cryptic                                                                           | 24596                 | IPI00000180.1 | 22.87                       | 3                     |
| CSNK2A1 protein                                                                   | 45879                 | IPI00016613.2 | 27.96                       | 7                     |
| CTCL tumor antigen se20-9                                                         | 142607                | IPI00022827.1 | 14.575                      | 14                    |
| C-terminal binding protein 1                                                      | 47505                 | IPI00012835.1 | 19.318                      | 5                     |
| C-terminal binding protein 2                                                      | 56066                 | IPI00010120.3 | 8.967                       | 4                     |
| CTP synthase                                                                      | 66648                 | IPI00290142.5 | 3.215                       | 2                     |
| CTTN protein                                                                      | 70915                 | IPI00062884.2 | 35.804                      | 19                    |

| Protein Description                                                           | Molecular Weight (Da) | IPI Number    | Total Sequence Coverage (%) | Total Unique Peptides |
|-------------------------------------------------------------------------------|-----------------------|---------------|-----------------------------|-----------------------|
| Cullin 4A                                                                     | 87624                 | IPI00419273.1 | 8.3                         | 6                     |
| Cullin homolog 5                                                              | 90897                 | IPI00216003.3 | 11.41                       | 4                     |
| Cyclin G-associated kinase                                                    | 143100                | IPI00298949.1 | 8.543                       | 8                     |
| Cyclin T1                                                                     | 80634                 | IPI00030247.1 | 2.479                       | 2                     |
| Cyclin-dependent kinase 2-associated protein 1                                | 12357                 | IPI00022340.1 | 31.304                      | 2                     |
| Cyclin-dependent kinase inhibitor-related protein                             | 35698                 | IPI00102425.1 | 28.205                      | 4                     |
| Cyclophilin-like protein                                                      | 18615                 | IPI00032473.1 | 33.939                      | 4                     |
| Cystathionine-beta-synthase                                                   | 60548                 | IPI00219352.3 | 4.537                       | 2                     |
| Cystatin B                                                                    | 11133                 | IPI00021828.1 | 70.408                      | 5                     |
| Cystatin C precursor                                                          | 15789                 | IPI00032293.1 | 25.342                      | 4                     |
| Cysteine and histidine-rich domain (CHORD)-containing, zinc binding protein 1 | 37466                 | IPI00015897.2 | 18.373                      | 4                     |
| Cysteine desulfurase, mitochondrial precursor                                 | 50222                 | IPI00295240.5 | 15.974                      | 5                     |
| Cysteine-rich protein 2                                                       | 22478                 | IPI00006034.1 | 33.173                      | 5                     |
| Cystic fibrosis transmembrane conductance regulator                           | 168066                | IPI00302383.3 | 7.365                       | 8                     |
| Cytochrome b-5 isoform 2                                                      | 11261                 | IPI00182933.3 | 58.163                      | 5                     |
| Cytochrome b5 outer mitochondrial membrane isoform precursor                  | 16684                 | IPI00303954.3 | 31.333                      | 2                     |
| Cytochrome c                                                                  | 11610                 | IPI00465315.5 | 52.885                      | 8                     |
| Cytochrome c oxidase copper chaperone                                         | 6779                  | IPI00218144.2 | 67.742                      | 3                     |
| Cytochrome c oxidase polypeptide Va, mitochondrial precursor                  | 16764                 | IPI00025086.3 | 59.333                      | 12                    |
| Cytochrome c oxidase polypeptide Vb, mitochondrial precursor                  | 13687                 | IPI00021785.2 | 44.961                      | 8                     |
| Cytochrome c oxidase polypeptide VIb                                          | 10055                 | IPI00216085.2 | 28.235                      | 3                     |
| Cytochrome c oxidase polypeptide VIc precursor                                | 8776                  | IPI00015972.1 | 40                          | 7                     |
| Cytochrome c oxidase polypeptide VIc, mitochondrial precursor                 | 7241                  | IPI00013968.1 | 28.571                      | 2                     |
| Cytochrome c oxidase subunit 2                                                | 25548                 | IPI00017510.3 | 26.432                      | 6                     |
| Cytochrome c oxidase subunit IV isoform 1, mitochondrial precursor            | 19564                 | IPI00006579.1 | 52.663                      | 13                    |
| Cytochrome c oxidase subunit VIIa-related protein, mitochondrial precursor    | 12607                 | IPI00022421.2 | 40.351                      | 2                     |
| Cytochrome c1, heme protein, mitochondrial precursor                          | 35367                 | IPI00029264.3 | 13.538                      | 3                     |
| Cytoplasmic antiproteinase 2                                                  | 42758                 | IPI00032134.1 | 5.882                       | 2                     |
| Cytoplasmic antiproteinase 3                                                  | 42376                 | IPI00032139.1 | 11.17                       | 3                     |
| Cytosolic acyl coenzyme A thioester hydrolase, inducible                      | 46248                 | IPI00333838.1 | 31.116                      | 9                     |
| Cytosolic nonspecific dipeptidase                                             | 52845                 | IPI00177728.3 | 63.789                      | 29                    |
| Cytosolic purine 5'-nucleotidase                                              | 64928                 | IPI00029054.1 | 11.943                      | 3                     |
| D21S2056E protein                                                             | 53380                 | IPI00465285.1 | 7.082                       | 3                     |
| D-3-phosphoglycerate dehydrogenase                                            | 56483                 | IPI00011200.4 | 28.759                      | 14                    |
| D-beta-hydroxybutyrate dehydrogenase, mitochondrial precursor                 | 38132                 | IPI00025341.2 | 15.452                      | 2                     |
| DBR1 protein                                                                  | 61516                 | IPI00305545.1 | 6.066                       | 2                     |
| DC12                                                                          | 42146                 | IPI00024618.1 | 5.391                       | 2                     |

| Protein Description                                                                                                        | Molecular Weight (Da) | IPI Number    | Total Sequence Coverage (%) | Total Unique Peptides |
|----------------------------------------------------------------------------------------------------------------------------|-----------------------|---------------|-----------------------------|-----------------------|
| DC38                                                                                                                       | 31672                 | IPI00005540.2 | 12.59                       | 2                     |
| DC50                                                                                                                       | 12341                 | IPI00009922.3 | 66.055                      | 8                     |
| DCC-interacting protein 13 alpha                                                                                           | 79614                 | IPI00015836.1 | 18.336                      | 7                     |
| DCC-interacting protein 13 beta                                                                                            | 74474                 | IPI00172513.3 | 16.867                      | 4                     |
| D-dopachrome tautomerase                                                                                                   | 12573                 | IPI00293867.6 | 37.607                      | 5                     |
| DEAD-box protein 3, X-chromosomal                                                                                          | 73067                 | IPI00215637.2 | 27.988                      | 15                    |
| DEAD-box protein 3, Y-chromosomal                                                                                          | 73049                 | IPI00293616.2 | 6.818                       | 3                     |
| DEAD-box protein 50                                                                                                        | 82514                 | IPI00031554.1 | 3.664                       | 2                     |
| DEAH (Asp-Glu-Ala-His) box polypeptide 15                                                                                  | 92770                 | IPI00177366.1 | 20.664                      | 13                    |
| DEAH (Asp-Glu-Ala-His) box polypeptide 29                                                                                  | 155179                | IPI00217413.2 | 3.433                       | 3                     |
| Death domain containing protein CRADD                                                                                      | 22731                 | IPI00020364.1 | 15.578                      | 2                     |
| Death-associated protein 1                                                                                                 | 11158                 | IPI00018117.1 | 47.059                      | 4                     |
| Decapping enzyme                                                                                                           | 56060                 | IPI00164672.2 | 7.767                       | 2                     |
| Dedicator of cytokinesis 7                                                                                                 | 239271                | IPI00513791.1 | 6.401                       | 10                    |
| Dedicator of cytokinesis protein 6                                                                                         | 229513                | IPI00184772.4 | 1.759                       | 2                     |
| Dehydrogenase E1 and transketolase domain containing protein 1                                                             | 102977                | IPI00063408.5 | 6.311                       | 3                     |
| DEK protein                                                                                                                | 42648                 | IPI00020021.3 | 24.267                      | 8                     |
| Deleted in malignant brain tumors 1                                                                                        | 259547                | IPI00014260.2 | 3.87                        | 2                     |
| Delta-1-pyrroline-5-carboxylate dehydrogenase, mitochondrial precursor                                                     | 61681                 | IPI00217871.4 | 11.901                      | 5                     |
| Delta3,5-delta2,4-dienoyl-CoA isomerase, mitochondrial precursor                                                           | 35971                 | IPI00011416.1 | 28.049                      | 7                     |
| Delta-aminolevulinic acid Dehydratase isoform b                                                                            | 37205                 | IPI00010314.2 | 29.204                      | 6                     |
| Deltex 3-like protein                                                                                                      | 83501                 | IPI00152503.1 | 10.946                      | 5                     |
| Density-regulated protein                                                                                                  | 22271                 | IPI00306280.3 | 18.09                       | 3                     |
| Desmoglein-2 precursor                                                                                                     | 122309                | IPI00028931.1 | 9.848                       | 5                     |
| Dextrin isoform b                                                                                                          | 16610                 | IPI00031045.3 | 44.595                      | 9                     |
| Deubiquitinating protein VCIP135                                                                                           | 134236                | IPI00064162.2 | 4.501                       | 3                     |
| Development and Differentiation enhancing factor 1                                                                         | 125420                | IPI00410303.1 | 4.074                       | 3                     |
| Developmentally regulated GTP-binding protein 1                                                                            | 40517                 | IPI00031836.3 | 8.447                       | 2                     |
| Developmentally regulated GTP-binding protein 2                                                                            | 40720                 | IPI00022697.3 | 9.066                       | 2                     |
| DHX30 protein                                                                                                              | 133854                | IPI00411733.3 | 13.903                      | 9                     |
| Diaphanous protein homolog 1                                                                                               | 139577                | IPI00550179.2 | 12.201                      | 10                    |
| Dicer1                                                                                                                     | 218542                | IPI00219036.5 | 2.029                       | 2                     |
| Dihydrolipoyl dehydrogenase, mitochondrial precursor                                                                       | 54116                 | IPI00015911.1 | 46.169                      | 18                    |
| Dihydrolipoyllysine-residue acetyltransferase component of pyruvate dehydrogenase complex, mitochondrial precursor         | 65739                 | IPI00021338.1 | 16.124                      | 8                     |
| Dihydrolipoyllysine-residue succinyltransferase component of 2-oxoglutarate dehydrogenase complex, mitochondrial precursor | 48609                 | IPI00420108.4 | 26.049                      | 11                    |

| Protein Description                                 | Molecular Weight (Da) | IPI Number    | Total Sequence Coverage (%) | Total Unique Peptides |
|-----------------------------------------------------|-----------------------|---------------|-----------------------------|-----------------------|
| Dihydropteridine reductase                          | 25787                 | IPI00014439.3 | 54.098                      | 11                    |
| Dihydropyridine receptor alpha 2 subunit            | 125229                | IPI00470535.1 | 3.063                       | 2                     |
| Dihydropyrimidinase related protein-1               | 62145                 | IPI00414123.4 | 55.769                      | 20                    |
| Dihydropyrimidinase related protein-2               | 62255                 | IPI00257508.4 | 14.685                      | 7                     |
| Dihydropyrimidinase-like 2                          | 66975                 | IPI00106642.4 | 49.758                      | 16                    |
| Di-N-acetylchitobiase precursor                     | 43732                 | IPI00007778.1 | 10.909                      | 2                     |
| Dipeptidyl peptidase IV                             | 88222                 | IPI00018953.1 | 12.402                      | 6                     |
| Dipeptidyl-peptidase II precursor                   | 54293                 | IPI00296141.1 | 38.821                      | 13                    |
| DJ-1 protein                                        | 19878                 | IPI00298547.3 | 93.122                      | 26                    |
| DJ1014D13.1 protein                                 | 70857                 | IPI00465233.1 | 19.934                      | 8                     |
| DJ1033B10.5.2                                       | 75086                 | IPI00033524.1 | 8.498                       | 3                     |
| DKFZP564J0863 protein                               | 60503                 | IPI00550523.2 | 18.669                      | 6                     |
| DKFZP566J2046 protein                               | 24837                 | IPI00552360.1 | 40.625                      | 5                     |
| DKFZP566O084 protein                                | 35097                 | IPI00023474.2 | 17.846                      | 5                     |
| DKFZP586B1621 protein                               | 58910                 | IPI00551024.2 | 31.826                      | 15                    |
| DNA-                                                | 35401                 | IPI00215911.2 | 24.921                      | 8                     |
| DNA damage binding protein 1                        | 126949                | IPI00293464.4 | 13.585                      | 9                     |
| DNA polymerase beta                                 | 38023                 | IPI00219538.2 | 7.485                       | 2                     |
| DNA topoisomerase I                                 | 90669                 | IPI00413611.1 | 15.163                      | 8                     |
| DNA-damage inducible protein 2                      | 46542                 | IPI00031618.2 | 20.764                      | 5                     |
| DNA-directed RNA polymerase II 14.5 kDa polypeptide | 14514                 | IPI00006113.1 | 37.6                        | 3                     |
| DNA-directed RNA polymerase II 140 kDa polypeptide  | 133811                | IPI00027808.1 | 7.581                       | 6                     |
| DNA-directed RNA polymerase II 16 kDa polypeptide   | 16301                 | IPI00007283.1 | 33.803                      | 2                     |
| DNA-directed RNA polymerase II 23 kDa polypeptide   | 24596                 | IPI00291093.2 | 23.333                      | 3                     |
| DNA-directed RNA polymerase II 33 kDa polypeptide   | 31422                 | IPI00018288.1 | 23.273                      | 4                     |
| DNA-directed RNA polymerase II largest subunit      | 217069                | IPI00031627.1 | 9.289                       | 9                     |
| DNA-directed RNA polymerase III largest subunit     | 155649                | IPI00024163.1 | 3.163                       | 2                     |
| DnaJ homolog subfamily A member 1                   | 44839                 | IPI00012535.1 | 5.29                        | 2                     |
| DnaJ homolog subfamily A member 2                   | 45717                 | IPI00032406.1 | 20.146                      | 5                     |
| DnaJ homolog subfamily B member 1                   | 37889                 | IPI00015947.4 | 34.218                      | 10                    |
| DnaJ homolog subfamily B member 11 precursor        | 40489                 | IPI00008454.1 | 30.726                      | 8                     |
| DnaJ homolog subfamily C member 1                   | 63843                 | IPI00074870.1 | 7.04                        | 2                     |
| DnaJ homolog subfamily C member 7                   | 56405                 | IPI00329629.6 | 14.17                       | 5                     |
| DnaJ homolog subfamily C member 8                   | 30968                 | IPI00003438.1 | 34.47                       | 8                     |
| DNAJC11 protein                                     | 57161                 | IPI00333016.5 | 6.509                       | 2                     |
| DNAJC13 protein                                     | 88898                 | IPI00329220.1 | 5.74                        | 3                     |
| DNAPTP6 protein                                     | 54017                 | IPI00103027.3 | 6.762                       | 2                     |

| Protein Description                                                                     | Molecular Weight (Da) | IPI Number    | Total Sequence Coverage (%) | Total Unique Peptides |
|-----------------------------------------------------------------------------------------|-----------------------|---------------|-----------------------------|-----------------------|
| DNA-repair protein XRCC1                                                                | 69483                 | IPI00002564.1 | 6.635                       | 3                     |
| Dolichol-phosphate mannosyltransferase                                                  | 29616                 | IPI00022018.1 | 20                          | 3                     |
| Dolichyl-diphosphooligosaccharide--protein glycosyltransferase 48 kDa subunit precursor | 50670                 | IPI00297084.4 | 41.667                      | 11                    |
| Dolichyl-diphosphooligosaccharide--protein glycosyltransferase 63 kDa subunit precursor | 69241                 | IPI00301271.3 | 40.095                      | 19                    |
| Dolichyl-diphosphooligosaccharide--protein glycosyltransferase 67 kDa subunit precursor | 68527                 | IPI00025874.1 | 63.427                      | 40                    |
| Dolichyl-phosphate beta-glycosyltransferase                                             | 36922                 | IPI00002506.1 | 21.914                      | 6                     |
| Double stranded RNA activated protein kinase                                            | 62038                 | IPI00019463.2 | 10.163                      | 4                     |
| Double-strand-break repair protein rad21 homolog                                        | 71645                 | IPI00006715.3 | 10.301                      | 4                     |
| Dpy-30-like protein                                                                     | 11243                 | IPI00028109.1 | 50.505                      | 4                     |
| DPYSL3 protein                                                                          | 73864                 | IPI00029111.2 | 33.918                      | 14                    |
| Drebrin                                                                                 | 71381                 | IPI00003406.1 | 23.112                      | 12                    |
| Dual specificity mitogen-activated protein kinase kinase 1                              | 43280                 | IPI00219604.2 | 30.357                      | 9                     |
| Dual specificity mitogen-activated protein kinase kinase 2                              | 44396                 | IPI00003783.1 | 20.5                        | 7                     |
| Dual specificity phosphatase 23                                                         | 16578                 | IPI00306353.3 | 17.333                      | 2                     |
| Dual specificity protein phosphatase 3                                                  | 20465                 | IPI00018671.1 | 36.757                      | 6                     |
| Dynactin 3, isoform 2                                                                   | 19456                 | IPI00013654.1 | 10.795                      | 2                     |
| Dynactin 6                                                                              | 20734                 | IPI00220770.2 | 14.737                      | 2                     |
| Dynactin complex 50 kDa subunit                                                         | 44073                 | IPI00220503.7 | 65                          | 25                    |
| Dynamamin 1-like protein, isoform 2                                                     | 79392                 | IPI00235412.3 | 40.282                      | 17                    |
| Dynamamin-1                                                                             | 97346                 | IPI00413140.2 | 23.148                      | 15                    |
| Dynein heavy chain, cytosolic                                                           | 532072                | IPI00456969.1 | 35.45                       | 128                   |
| Dynein light chain 1, cytoplasmic                                                       | 10359                 | IPI00019329.1 | 51.685                      | 4                     |
| Dynein light chain 2, cytoplasmic                                                       | 10343                 | IPI00062037.1 | 39.326                      | 3                     |
| Dynein light chain-A                                                                    | 56592                 | IPI00007675.1 | 28.107                      | 11                    |
| Dynein light intermediate chain 2, cytosolic                                            | 54066                 | IPI00011592.3 | 38.618                      | 17                    |
| Dyskerin                                                                                | 57507                 | IPI00221394.7 | 16.569                      | 6                     |
| Dystonin isoform 1                                                                      | 629396                | IPI00074148.4 | 4.13                        | 13                    |
| Dystroglycan precursor                                                                  | 97520                 | IPI00028911.1 | 3.017                       | 2                     |
| E-1 enzyme                                                                              | 28914                 | IPI00038378.4 | 18.008                      | 3                     |
| E2IG3                                                                                   | 63528                 | IPI00003886.1 | 7.857                       | 2                     |
| E2IG5 protein                                                                           | 17359                 | IPI00550855.1 | 43.506                      | 7                     |
| EAP30 subunit of ELL complex                                                            | 28846                 | IPI00101524.3 | 12.016                      | 2                     |
| Early endosome antigen 1                                                                | 162367                | IPI00329536.1 | 33.026                      | 32                    |
| E-cadherin                                                                              | 99632                 | IPI00025861.2 | 19.534                      | 13                    |

| Protein Description                                                   | Molecular Weight (Da) | IPI Number    | Total Sequence Coverage (%) | Total Unique Peptides |
|-----------------------------------------------------------------------|-----------------------|---------------|-----------------------------|-----------------------|
| ECH1 protein                                                          | 35735                 | IPI00550041.1 | 36.89                       | 10                    |
| Echinoderm microtubule-associated protein-like 2                      | 70634                 | IPI00015944.3 | 20.801                      | 9                     |
| Echinoderm microtubule-associated protein-like 4                      | 108835                | IPI00001466.2 | 16.922                      | 14                    |
| Ectonucleotide pyrophosphatase/phosphodiesterase 1                    | 104857                | IPI00184311.2 | 4.108                       | 2                     |
| EDF-1 protein                                                         | 16359                 | IPI00021570.1 | 39.189                      | 4                     |
| EF-hand domain-containing protein 2                                   | 26680                 | IPI00060181.1 | 20                          | 5                     |
| EH-domain containing protein 1                                        | 60589                 | IPI00017184.2 | 26.217                      | 8                     |
| EH-domain containing protein 2                                        | 61123                 | IPI00100980.5 | 21.179                      | 6                     |
| EH-domain containing protein 4                                        | 61137                 | IPI00005578.1 | 21.257                      | 8                     |
| Elastase IIIA precursor                                               | 29456                 | IPI00295663.1 | 19.259                      | 3                     |
| ELAV-like protein 1                                                   | 36069                 | IPI00301936.3 | 51.84                       | 16                    |
| Electron transfer flavoprotein alpha-subunit, mitochondrial precursor | 35058                 | IPI00010810.1 | 55.556                      | 20                    |
| Electron transfer flavoprotein beta-subunit                           | 27826                 | IPI00004902.1 | 49.412                      | 15                    |
| ELMOD2 protein                                                        | 34938                 | IPI00217918.1 | 12.628                      | 2                     |
| Elongation factor 1-alpha 1                                           | 50109                 | IPI00025447.3 | 32.9                        | 12                    |
| Elongation factor 1-alpha 2                                           | 50438                 | IPI00014424.1 | 44.708                      | 16                    |
| Elongation factor 1-beta                                              | 24617                 | IPI00178440.2 | 53.571                      | 9                     |
| Elongation factor 1-delta                                             | 30972                 | IPI00023048.3 | 35.714                      | 11                    |
| Elongation factor 1-gamma                                             | 49956                 | IPI00000875.5 | 23.624                      | 12                    |
| Elongation factor 2                                                   | 95146                 | IPI00186290.5 | 56.359                      | 43                    |
| Elongation factor G 1, mitochondrial precursor                        | 83452                 | IPI00154473.3 | 22.37                       | 11                    |
| E-MAP-115-95                                                          | 72370                 | IPI00020771.1 | 15.573                      | 6                     |
| Embryonic lung protein                                                | 63413                 | IPI00007344.1 | 13.028                      | 4                     |
| Emerin                                                                | 28976                 | IPI00032003.1 | 31.89                       | 6                     |
| EMILIN 1 precursor                                                    | 106629                | IPI00013079.1 | 7.382                       | 3                     |
| Endoplasmic reticulum protein ERp29 precursor                         | 28975                 | IPI00024911.1 | 71.264                      | 18                    |
| Endoplasmin precursor                                                 | 92411                 | IPI00027230.3 | 73.724                      | 73                    |
| Endozepine                                                            | 10038                 | IPI00010182.3 | 65.517                      | 6                     |
| Enhancer of rudimentary homolog                                       | 12251                 | IPI00029631.1 | 24.038                      | 3                     |
| Enigma homolog                                                        | 63931                 | IPI00007935.2 | 32.383                      | 11                    |
| Enigma protein, isoform 1                                             | 49813                 | IPI00023122.1 | 12.473                      | 3                     |
| Enoyl-CoA hydratase, mitochondrial precursor                          | 31351                 | IPI00024993.3 | 63.103                      | 18                    |
| ENPP4 protein                                                         | 51608                 | IPI00007249.3 | 20.53                       | 7                     |
| EPB41L5 protein                                                       | 57849                 | IPI00217841.1 | 4.554                       | 2                     |
| Epidermal growth factor receptor substrate 15                         | 98613                 | IPI00292134.5 | 7.031                       | 3                     |
| Epidermal growth factor receptor substrate 15-like 1                  | 94197                 | IPI00163849.1 | 14.699                      | 9                     |
| Epididymal secretory protein E1 precursor                             | 16559                 | IPI00301579.3 | 36.424                      | 7                     |

| Protein Description                                        | Molecular Weight (Da) | IPI Number    | Total Sequence Coverage (%) | Total Unique Peptides |
|------------------------------------------------------------|-----------------------|---------------|-----------------------------|-----------------------|
| Epididymis-specific alpha-mannosidase precursor            | 113916                | IPI00328488.5 | 7.631                       | 5                     |
| Epiplakin                                                  | 552754                | IPI00010951.1 | 12.537                      | 11                    |
| Epoxide hydrolase 1                                        | 52915                 | IPI00009896.1 | 45.275                      | 17                    |
| Epoxide hydrolase 2, cytoplasmic                           | 62575                 | IPI00104341.3 | 32.973                      | 10                    |
| ERFS                                                       | 75426                 | IPI00009070.1 | 8.626                       | 3                     |
| ERGIC-53 protein precursor                                 | 57513                 | IPI00026530.4 | 31.961                      | 17                    |
| ERO1-like protein alpha precursor                          | 54358                 | IPI00386755.2 | 14.957                      | 5                     |
| ERO1-like protein beta precursor                           | 53493                 | IPI00429633.1 | 9.636                       | 4                     |
| ER-resident protein ERdj5                                  | 91049                 | IPI00293260.1 | 14.124                      | 6                     |
| Erythrocyte band 7 integral membrane protein               | 31580                 | IPI00219682.5 | 49.129                      | 10                    |
| Esterase D                                                 | 31442                 | IPI00411706.1 | 56.738                      | 10                    |
| Estradiol 17-beta-dehydrogenase 8                          | 26957                 | IPI00021890.1 | 20.69                       | 4                     |
| Ethanolamine-phosphate cytidyltransferase                  | 43808                 | IPI00015285.3 | 6.684                       | 2                     |
| Eukaryotic initiation factor 4A-I                          | 46125                 | IPI00025491.1 | 52.217                      | 17                    |
| Eukaryotic initiation factor 5A isoform I variant A        | 20157                 | IPI00376005.1 | 42.935                      | 13                    |
| Eukaryotic peptide chain release factor subunit 1          | 49000                 | IPI00429191.1 | 11.442                      | 3                     |
| Eukaryotic translation initiation factor 1                 | 12725                 | IPI00015077.1 | 38.938                      | 4                     |
| Eukaryotic translation initiation factor 1A, Y-chromosomal | 16301                 | IPI00023004.6 | 38.462                      | 6                     |
| Eukaryotic translation initiation factor 2 subunit 1       | 35958                 | IPI00219678.2 | 37.261                      | 8                     |
| Eukaryotic translation initiation factor 2 subunit 2       | 38364                 | IPI00021728.3 | 29.73                       | 7                     |
| Eukaryotic translation initiation factor 2 subunit 3       | 50946                 | IPI00297982.6 | 18.047                      | 7                     |
| Eukaryotic translation initiation factor 2C 1              | 97151                 | IPI00007736.4 | 5.951                       | 4                     |
| Eukaryotic translation initiation factor 3 subunit 1       | 29045                 | IPI00290461.3 | 8.915                       | 3                     |
| Eukaryotic translation initiation factor 3 subunit 10      | 166468                | IPI00029012.1 | 29.088                      | 35                    |
| Eukaryotic translation initiation factor 3 subunit 11      | 25043                 | IPI00033143.1 | 16.972                      | 3                     |
| Eukaryotic translation initiation factor 3 subunit 2       | 36479                 | IPI00012795.3 | 50.769                      | 11                    |
| Eukaryotic translation initiation factor 3 subunit 3       | 39905                 | IPI00006182.1 | 30.966                      | 8                     |
| Eukaryotic translation initiation factor 3 subunit 4       | 35589                 | IPI00290460.3 | 31.875                      | 7                     |
| Eukaryotic translation initiation factor 3 subunit 5       | 37540                 | IPI00011257.1 | 25.21                       | 6                     |
| Eukaryotic translation initiation factor 3 subunit 6       | 52187                 | IPI00013068.1 | 12.584                      | 4                     |
| Eukaryotic translation initiation factor 3 subunit 7       | 63932                 | IPI00006181.1 | 12.044                      | 6                     |
| Eukaryotic translation initiation factor 3 subunit 8       | 105278                | IPI00016910.1 | 26.396                      | 25                    |
| Eukaryotic translation initiation factor 4 gamma 1         | 175426                | IPI00384463.2 | 15.313                      | 15                    |
| Eukaryotic translation initiation factor 4 gamma 2         | 102297                | IPI00015952.1 | 18.523                      | 12                    |
| Eukaryotic translation initiation factor 4B                | 69183                 | IPI00012079.1 | 32.57                       | 15                    |
| Eukaryotic translation initiation factor 4E                | 25082                 | IPI00027485.3 | 9.217                       | 2                     |
| Eukaryotic translation initiation factor 5                 | 49192                 | IPI00022648.2 | 25.522                      | 11                    |

| Protein Description                               | Molecular Weight (Da) | IPI Number    | Total Sequence Coverage (%) | Total Unique Peptides |
|---------------------------------------------------|-----------------------|---------------|-----------------------------|-----------------------|
| Eukaryotic translation initiation factor 5B       | 138715                | IPI00299254.3 | 15.656                      | 11                    |
| Eukaryotic translation initiation factor 6        | 26582                 | IPI00010105.1 | 17.143                      | 2                     |
| Exocyst complex 84-kDa subunit                    | 81747                 | IPI00028264.3 | 14.897                      | 5                     |
| Exocyst complex component Sec10                   | 81801                 | IPI00413434.1 | 4.237                       | 3                     |
| Exocyst complex component Sec5                    | 104173                | IPI00215805.2 | 8.216                       | 5                     |
| Exocyst complex component Sec8                    | 110429                | IPI00059279.5 | 7.29                        | 5                     |
| Exosome complex exonuclease RRP42                 | 31815                 | IPI00014198.2 | 10.997                      | 2                     |
| Ezrin-radixin-moesin binding phosphoprotein 50    | 38845                 | IPI00003527.3 | 47.765                      | 14                    |
| F-actin capping protein alpha-1 subunit           | 32902                 | IPI00005969.1 | 37.063                      | 7                     |
| F-actin capping protein alpha-2 subunit           | 32798                 | IPI00026182.4 | 25.263                      | 3                     |
| Factor VIII intron 22 protein                     | 39079                 | IPI00012433.2 | 7.278                       | 2                     |
| FAHD2A protein                                    | 34574                 | IPI00329742.1 | 23.248                      | 4                     |
| Family with sequence similarity 23, member A      | 39637                 | IPI00259858.3 | 11.966                      | 2                     |
| Far upstream element binding protein 2            | 72664                 | IPI00298363.2 | 6.365                       | 2                     |
| Far upstream element-binding protein              | 67518                 | IPI00375441.2 | 32.453                      | 17                    |
| Farnesyl diphosphate synthase                     | 48245                 | IPI00101405.1 | 18.616                      | 7                     |
| Fatty acid synthase                               | 273227                | IPI00418433.1 | 26.882                      | 40                    |
| Fatty acid transport protein                      | 71386                 | IPI00021089.1 | 5.148                       | 3                     |
| Fatty acid-binding protein, epidermal             | 15155                 | IPI00007797.1 | 16.296                      | 6                     |
| Ferritin heavy chain                              | 23335                 | IPI00419501.4 | 49.01                       | 10                    |
| Ferritin light chain                              | 28399                 | IPI00375676.2 | 40.157                      | 12                    |
| Ferritin, heavy polypeptide-like 16               | 21260                 | IPI00550094.1 | 40.437                      | 5                     |
| Fibrillarin                                       | 33763                 | IPI00025039.1 | 38.006                      | 8                     |
| Fibronectin type III domain containing 3B         | 132872                | IPI00217490.2 | 2.907                       | 2                     |
| Fibronectin type III domain containing protein 3a | 124974                | IPI00007210.3 | 4.409                       | 3                     |
| Filamin A                                         | 280586                | IPI00333541.3 | 43.521                      | 85                    |
| Filamin B                                         | 276765                | IPI00477536.1 | 48.591                      | 96                    |
| FK506 binding protein 11 precursor                | 22166                 | IPI00009885.1 | 24.378                      | 5                     |
| FK506 binding protein 9                           | 63044                 | IPI00182126.3 | 3.509                       | 2                     |
| FK506-binding protein 1A                          | 11812                 | IPI00413778.3 | 79.439                      | 7                     |
| FK506-binding protein 2 precursor                 | 15639                 | IPI00002535.2 | 51.408                      | 6                     |
| FK506-binding protein 3                           | 25161                 | IPI00024157.1 | 56.25                       | 17                    |
| FK506-binding protein 4                           | 51641                 | IPI00219005.2 | 52.62                       | 22                    |
| FK506-binding protein 5                           | 51180                 | IPI00218775.2 | 29.103                      | 9                     |
| FK506-binding protein 8                           | 44621                 | IPI00328161.6 | 7.748                       | 2                     |
| FKSG19                                            | 15387                 | IPI00001022.4 | 25.352                      | 2                     |
| FKSG26 protein                                    | 76619                 | IPI00007320.3 | 15.828                      | 5                     |



| Protein Description                                                               | Molecular Weight (Da) | IPI Number    | Total Sequence Coverage (%) | Total Unique Peptides |
|-----------------------------------------------------------------------------------|-----------------------|---------------|-----------------------------|-----------------------|
| FKSG27                                                                            | 62678                 | IPI00103925.1 | 4.494                       | 2                     |
| Flap endonuclease-1                                                               | 42566                 | IPI00026215.1 | 9.474                       | 2                     |
| Flavin reductase                                                                  | 22580                 | IPI00219910.1 | 56.872                      | 11                    |
| Flightless-I protein homolog                                                      | 144659                | IPI00031023.1 | 20.41                       | 16                    |
| FLJ10514 protein                                                                  | 73516                 | IPI00100460.2 | 11.783                      | 4                     |
| FLJ10747 protein                                                                  | 76130                 | IPI00296938.1 | 9.488                       | 4                     |
| FLJ11200 protein                                                                  | 53227                 | IPI00305303.3 | 9.595                       | 3                     |
| FLJ11806 protein                                                                  | 82823                 | IPI00397376.1 | 7.473                       | 3                     |
| FLJ12436 protein                                                                  | 42355                 | IPI00153023.5 | 8.158                       | 2                     |
| FLJ13220 protein                                                                  | 74281                 | IPI00296563.3 | 4.036                       | 2                     |
| FLJ13868 protein                                                                  | 50925                 | IPI00305627.5 | 12.393                      | 4                     |
| FLJ14249 protein                                                                  | 42816                 | IPI00328868.1 | 20.408                      | 7                     |
| FLJ20625 protein                                                                  | 17714                 | IPI00016670.2 | 26.708                      | 2                     |
| FLJ20758 protein                                                                  | 78500                 | IPI00181231.8 | 3.193                       | 2                     |
| FLJ22386 protein                                                                  | 32190                 | IPI00002341.3 | 8.014                       | 2                     |
| FLJ39553 protein                                                                  | 39911                 | IPI00295855.7 | 13.636                      | 3                     |
| Flotillin-1                                                                       | 47326                 | IPI00027438.2 | 24.122                      | 7                     |
| Flotillin-2                                                                       | 41659                 | IPI00029625.3 | 39.05                       | 10                    |
| FMRP interacting protein, 82kD                                                    | 76075                 | IPI00002349.2 | 13.525                      | 5                     |
| FOE                                                                               | 137228                | IPI00375330.4 | 3.097                       | 2                     |
| Fragile X mental retardation syndrome related protein 1                           | 69649                 | IPI00016249.1 | 11.433                      | 5                     |
| Fragile X mental retardation syndrome related protein 2                           | 74083                 | IPI00016250.3 | 10.401                      | 5                     |
| FRG1 protein                                                                      | 29154                 | IPI00004655.1 | 10.465                      | 2                     |
| Fructosamine-3-kinase                                                             | 35149                 | IPI00023729.1 | 30.421                      | 7                     |
| Fructose-1,6-bisphosphatase                                                       | 36660                 | IPI00073772.4 | 34.125                      | 10                    |
| Fructose-bisphosphate aldolase A                                                  | 39264                 | IPI00465439.4 | 73.278                      | 36                    |
| Fructose-bisphosphate aldolase B                                                  | 39317                 | IPI00218407.5 | 38.567                      | 12                    |
| Fructose-bisphosphate aldolase C                                                  | 39300                 | IPI00418262.3 | 45.73                       | 18                    |
| FSD1-like                                                                         | 34712                 | IPI00513845.1 | 12.829                      | 2                     |
| Full-length cDNA 5-PRIME end of clone CS0DN005YI08 of Adult brain of Homo sapiens | 29013                 | IPI00384026.1 | 15.649                      | 6                     |
| Full-length cDNA clone CS0DC006YH13 of Neuroblastoma of Homo sapiens              | 8609                  | IPI00009247.2 | 16                          | 2                     |
| Full-length cDNA clone CS0DI069YD09 of Placenta of Homo sapiens                   | 67215                 | IPI00165026.2 | 7.912                       | 3                     |
| Full-length cDNA clone CS0DN001YP04 of Adult brain of Homo sapiens                | 40431                 | IPI00383975.1 | 55.041                      | 42                    |
| Fumarate hydratase, mitochondrial precursor                                       | 54602                 | IPI00296053.3 | 55.686                      | 23                    |
| Fumarylacetoacetase                                                               | 46344                 | IPI00031708.1 | 7.876                       | 2                     |
| G protein pathway suppressor 1 isoform 2                                          | 55501                 | IPI00156282.2 | 9.572                       | 4                     |

| Protein Description                                                                                                                           | Molecular Weight (Da) | IPI Number    | Total Sequence Coverage (%) | Total Unique Peptides |
|-----------------------------------------------------------------------------------------------------------------------------------------------|-----------------------|---------------|-----------------------------|-----------------------|
| G protein-coupled receptor 56 isoform b                                                                                                       | 77023                 | IPI00397949.3 | 5.24                        | 2                     |
| G1 to S phase transition protein 1 homolog                                                                                                    | 55720                 | IPI00218829.7 | 10.421                      | 2                     |
| GA17 protein                                                                                                                                  | 42486                 | IPI00102069.4 | 8.824                       | 3                     |
| Galactokinase                                                                                                                                 | 42246                 | IPI00019383.1 | 20.918                      | 4                     |
| Galactose mutarotase                                                                                                                          | 37742                 | IPI00060200.3 | 21.93                       | 5                     |
| Galactose-1-phosphate uridylyltransferase                                                                                                     | 43336                 | IPI00013925.3 | 5.277                       | 2                     |
| Galactosylgalactosylxylosylprotein 3-beta-glucuronosyltransferase 3                                                                           | 37099                 | IPI00304331.2 | 23.582                      | 5                     |
| Galectin-1                                                                                                                                    | 14575                 | IPI00219219.2 | 36.567                      | 4                     |
| Galectin-2                                                                                                                                    | 14635                 | IPI00007242.1 | 83.333                      | 8                     |
| Galectin-3                                                                                                                                    | 26041                 | IPI00465431.4 | 25.703                      | 5                     |
| Galectin-3 binding protein precursor                                                                                                          | 65289                 | IPI00023673.1 | 25.983                      | 14                    |
| Galectin-4                                                                                                                                    | 35918                 | IPI00009750.1 | 32.508                      | 8                     |
| Gamma enolase                                                                                                                                 | 47108                 | IPI00216171.2 | 70.901                      | 31                    |
| Gamma-aminobutyric acid receptor associated protein                                                                                           | 13909                 | IPI00027253.3 | 11.111                      | 2                     |
| Gamma-aminobutyric acid receptor-associated protein-like 1                                                                                    | 14035                 | IPI00027733.1 | 23.077                      | 2                     |
| Gamma-glutamyltransferase-like activity 1                                                                                                     | 62293                 | IPI00002243.2 | 4.089                       | 2                     |
| Gamma-interferon-inducible protein Irf-16 (Interferon-inducible myeloid differentiation transcriptional activator) (IFI 16). SPLICE ISOFORM 2 | 82385                 | IPI00217474.2 | 7.776                       | 3                     |
| Gamma-soluble NSF attachment protein                                                                                                          | 34724                 | IPI00293817.3 | 39.423                      | 14                    |
| Ganglioside GM2 activator precursor                                                                                                           | 20809                 | IPI00018236.1 | 33.679                      | 5                     |
| Ganglioside-induced differentiation-associated protein 1                                                                                      | 41226                 | IPI00290544.2 | 18.715                      | 9                     |
| GARS protein                                                                                                                                  | 84594                 | IPI00465260.1 | 42.876                      | 27                    |
| GCN1-like protein 1                                                                                                                           | 292427                | IPI00001159.8 | 16.629                      | 29                    |
| GDP-L-fucose synthetase                                                                                                                       | 35870                 | IPI00014361.1 | 9.346                       | 2                     |
| GDP-mannose 4,6 dehydratase                                                                                                                   | 41923                 | IPI00030207.1 | 15.323                      | 4                     |
| GDP-mannose pyrophosphorylase A                                                                                                               | 46262                 | IPI00101782.1 | 26.667                      | 12                    |
| Gelsolin precursor                                                                                                                            | 85644                 | IPI00026314.1 | 55.754                      | 35                    |
| Gem-associated protein 5                                                                                                                      | 168455                | IPI00291783.3 | 1.393                       | 2                     |
| Gene product with similarity to Ubiquitin binding enzyme                                                                                      | 56860                 | IPI00005194.1 | 6.004                       | 3                     |
| General transcription factor III C, polypeptide 5, 63kDa                                                                                      | 60331                 | IPI00411530.2 | 8.745                       | 2                     |
| Genethonin 1                                                                                                                                  | 38983                 | IPI00022538.1 | 13.687                      | 2                     |
| Gephyrin                                                                                                                                      | 79698                 | IPI00016006.1 | 5.842                       | 2                     |
| Geranylgeranyl transferase type II alpha subunit                                                                                              | 65030                 | IPI00022664.1 | 5.996                       | 2                     |
| Glia derived nexin precursor                                                                                                                  | 43974                 | IPI00009890.1 | 10.302                      | 2                     |
| Glucagon precursor                                                                                                                            | 20896                 | IPI00306140.5 | 73.333                      | 42                    |
| Glucosamine-6-phosphate isomerase                                                                                                             | 32648                 | IPI00009305.1 | 10.381                      | 3                     |
| Glucose-6-phosphate dehydroGenase                                                                                                             | 59220                 | IPI00289800.6 | 34.175                      | 12                    |

| Protein Description                                         | Molecular Weight (Da) | IPI Number     | Total Sequence Coverage (%) | Total Unique Peptides |
|-------------------------------------------------------------|-----------------------|----------------|-----------------------------|-----------------------|
| Glucose-6-phosphate isomerase                               | 62976                 | IPI00027497.4  | 59.425                      | 33                    |
| Glucosidase II beta subunit precursor                       | 59259                 | IPI00026154.1  | 30.93                       | 12                    |
| Glucosylceramidase precursor                                | 59678                 | IPI00021807.2  | 24.813                      | 7                     |
| Glutamate decarboxylase 2                                   | 65368                 | IPI00012796.1  | 11.966                      | 4                     |
| Glutamate dehydrogenase 1, mitochondrial precursor          | 61359                 | IPI00016801.1  | 51.075                      | 33                    |
| Glutamate--cysteine ligase catalytic subunit                | 72588                 | IPI00215768.2  | 13.994                      | 6                     |
| Glutamate--cysteine ligase regulatory subunit               | 30708                 | IPI00010090.1  | 14.234                      | 3                     |
| Glutamine synthetase                                        | 42037                 | IPI00010130.1  | 10.188                      | 3                     |
| Glutaminyl-peptide cyclotransferase precursor               | 40851                 | IPI00003919.1  | 47.368                      | 11                    |
| Glutaminyl-tRNA synthetase                                  | 87743                 | IPI00026665.1  | 38.71                       | 21                    |
| Glutaredoxin                                                | 11637                 | IPI00219025.2  | 32.381                      | 3                     |
| Glutaredoxin-related protein C14orf87                       | 16618                 | IPI00333763.7  | 22.93                       | 2                     |
| Glutathione peroxidase 1 isoform 1                          | 22027                 | IPI00293975.3  | 20.197                      | 3                     |
| Glutathione peroxidase-gastrointestinal                     | 21893                 | IPI00298176.1  | 32.632                      | 3                     |
| Glutathione reductase, mitochondrial precursor              | 56221                 | IPI00016862.1  | 41.762                      | 16                    |
| Glutathione S-transferase A1                                | 25484                 | IPI00216644.3  | 59.276                      | 13                    |
| Glutathione S-transferase kappa 1                           | 25349                 | IPI00219673.5  | 53.778                      | 11                    |
| Glutathione S-transferase Mu 2                              | 25597                 | IPI00219067.3  | 30.415                      | 6                     |
| Glutathione S-transferase Mu 3                              | 26411                 | IPI00246975.7  | 31.696                      | 6                     |
| Glutathione S-transferase P                                 | 23210                 | IPI00219757.12 | 66.029                      | 11                    |
| Glutathione S-transferase theta 1                           | 27187                 | IPI00219070.6  | 17.992                      | 3                     |
| Glutathione synthetase                                      | 52352                 | IPI00010706.1  | 22.152                      | 10                    |
| Glutathione transferase omega 1                             | 27548                 | IPI00019755.3  | 47.303                      | 11                    |
| Glyceraldehyde-3-phosphate dehydrogenase, liver             | 35899                 | IPI00219018.4  | 85.629                      | 28                    |
| Glyceraldehyde-3-phosphate dehydrogenase, muscle            | 35853                 | IPI00383758.1  | 37.725                      | 15                    |
| Glycerol-3-phosphate dehydrogenase [NAD+], cytoplasmic      | 37438                 | IPI00295777.4  | 42.241                      | 12                    |
| Glycerol-3-phosphate dehydrogenase 1-like                   | 38394                 | IPI00032959.2  | 31.909                      | 7                     |
| Glycerol-3-phosphate dehydrogenase, mitochondrial precursor | 80764                 | IPI00017895.1  | 33.15                       | 19                    |
| Glycogen phosphorylase, brain form                          | 96503                 | IPI00004358.3  | 19.715                      | 15                    |
| GlycoGenin                                                  | 39359                 | IPI00180386.2  | 11.714                      | 4                     |
| Glyoxylate reductase/hydroxypyruvate reductase              | 35646                 | IPI00037448.3  | 39.634                      | 10                    |
| GMFB protein                                                | 18098                 | IPI00412987.2  | 31.169                      | 3                     |
| GMP reductase 2                                             | 37850                 | IPI00009844.1  | 6.897                       | 2                     |
| GMP synthase                                                | 76667                 | IPI00029079.5  | 34.199                      | 11                    |
| GNAQ protein                                                | 42115                 | IPI00288947.3  | 17.549                      | 5                     |
| Golgi apparatus protein 1                                   | 137132                | IPI00414717.1  | 3.907                       | 4                     |
| Golgi autoantigen, golgin subfamily A member 1              | 88146                 | IPI00031115.4  | 13.038                      | 4                     |

| Protein Description                                                                    | Molecular Weight (Da) | IPI Number    | Total Sequence Coverage (%) | Total Unique Peptides |
|----------------------------------------------------------------------------------------|-----------------------|---------------|-----------------------------|-----------------------|
| Golgi autoantigen, golgin subfamily B member 1                                         | 375848                | IPI00004671.1 | 26.02                       | 47                    |
| Golgi phosphoprotein 2                                                                 | 46245                 | IPI00171411.4 | 20.488                      | 8                     |
| Golgi phosphoprotein 3                                                                 | 33790                 | IPI00005490.1 | 39.933                      | 6                     |
| Golgi reassembly stacking protein 2                                                    | 51514                 | IPI00031241.5 | 7.975                       | 3                     |
| Golgi resident protein GCP60                                                           | 60425                 | IPI00009315.5 | 20.493                      | 7                     |
| Golgi-specific brefeldin A-resistance guanine nucleotide exchange factor 1             | 206315                | IPI00021954.1 | 2.959                       | 4                     |
| GPBP-interacting protein A                                                             | 130301                | IPI00297578.2 | 2.115                       | 2                     |
| GPI-anchor transamidase precursor                                                      | 45223                 | IPI00022543.4 | 8.608                       | 2                     |
| GPP34-related protein                                                                  | 32747                 | IPI00012313.3 | 30.175                      | 4                     |
| Grb10 interacting GYF protein 2                                                        | 149978                | IPI00169434.2 | 4.388                       | 3                     |
| GRIP1 associated protein 1 isoform 1                                                   | 96018                 | IPI00413942.2 | 19.596                      | 10                    |
| GRLD6308                                                                               | 26694                 | IPI00024519.2 | 24.082                      | 3                     |
| Growth factor receptor-bound protein 2                                                 | 25178                 | IPI00021327.2 | 14.286                      | 2                     |
| Growth/differentiation factor 15 precursor                                             | 34147                 | IPI00306543.3 | 28.896                      | 5                     |
| GrpE protein homolog 1, mitochondrial precursor                                        | 24264                 | IPI00029557.3 | 34.562                      | 7                     |
| GSPT2 protein                                                                          | 68915                 | IPI00328294.1 | 9.554                       | 6                     |
| GTP:AMP phosphotransferase mitochondrial                                               | 25419                 | IPI00465256.3 | 81.858                      | 23                    |
| GTP-binding nuclear protein RAN                                                        | 24440                 | IPI00012507.2 | 36.574                      | 9                     |
| GTP-binding protein isoform IV                                                         | 55499                 | IPI00152481.1 | 4.962                       | 2                     |
| GTP-binding protein SAR1a                                                              | 22353                 | IPI00015954.1 | 48.485                      | 4                     |
| GTP-binding protein SAR1b                                                              | 22396                 | IPI00002149.1 | 62.121                      | 8                     |
| GTPBP1 protein                                                                         | 71419                 | IPI00010463.2 | 4.091                       | 2                     |
| GTP-GDP dissociation stimulator 1 isoform A                                            | 56453                 | IPI00424869.1 | 10.078                      | 4                     |
| Guanine deaminase                                                                      | 44161                 | IPI00465184.2 | 29.262                      | 6                     |
| Guanine deaminase                                                                      | 22231                 | IPI00514220.1 | 13.333                      | 2                     |
| Guanine nucleotide binding protein, alpha stimulating activity polypeptide 1 isoform c | 97701                 | IPI00095891.1 | 18.372                      | 12                    |
| Guanine nucleotide-binding protein G                                                   | 40375                 | IPI00220578.2 | 20.68                       | 3                     |
| Guanine nucleotide-binding protein G                                                   | 37307                 | IPI00003348.1 | 5.882                       | 2                     |
| Guanine nucleotide-binding protein G(I)/G(S)/G(O) gamma-12 subunit                     | 7870                  | IPI00221232.4 | 42.254                      | 3                     |
| Guanine nucleotide-binding protein G(I)/G(S)/G(O) gamma-4 subunit                      | 8383                  | IPI00030058.1 | 46.667                      | 3                     |
| Guanine nucleotide-binding protein G(o), alpha subunit 1                               | 39894                 | IPI00220281.2 | 31.445                      | 11                    |
| Guanine nucleotide-binding protein, alpha-13 subunit                                   | 44022                 | IPI00290928.2 | 19.629                      | 4                     |
| Guanine nucleotide-binding protein, alpha-14 subunit                                   | 41544                 | IPI00000695.1 | 5.915                       | 2                     |
| Guanine nucleotide-binding protein-like 1                                              | 68638                 | IPI00396387.2 | 4.448                       | 2                     |
| Guanylate kinase 1                                                                     | 23696                 | IPI00182293.4 | 28.571                      | 4                     |
| H2A histone family, member Y isoform 2                                                 | 39464                 | IPI00059366.3 | 55.795                      | 22                    |

| Protein Description                                         | Molecular Weight (Da) | IPI Number    | Total Sequence Coverage (%) | Total Unique Peptides |
|-------------------------------------------------------------|-----------------------|---------------|-----------------------------|-----------------------|
| H63 breast cancer expressed gene isoform a                  | 49468                 | IPI00374590.1 | 13.761                      | 5                     |
| HAH-P                                                       | 38415                 | IPI00250297.1 | 6.907                       | 2                     |
| Haloacid dehalogenase-like hydrolase domain containing 3    | 27982                 | IPI00009931.1 | 40.239                      | 8                     |
| Haptoglobin precursor                                       | 45177                 | IPI00478493.1 | 17.734                      | 5                     |
| HBxAg transactivated protein 2                              | 295821                | IPI00083708.2 | 2.886                       | 6                     |
| HCG V                                                       | 13944                 | IPI00030355.1 | 21.429                      | 2                     |
| HDJ2 protein                                                | 29450                 | IPI00386128.1 | 58.14                       | 9                     |
| HEAT repeat containing protein                              | 123941                | IPI00023330.2 | 2.174                       | 2                     |
| Heat shock 70 kDa protein 1L                                | 70331                 | IPI00301277.1 | 4.992                       | 2                     |
| Heat shock 70 kDa protein 4                                 | 94240                 | IPI00002966.1 | 47.857                      | 36                    |
| Heat shock 70 kDa protein 4L                                | 94426                 | IPI00295485.1 | 20.501                      | 11                    |
| Heat shock 70kDa protein 1A                                 | 69995                 | IPI00514377.3 | 60.374                      | 48                    |
| Heat shock factor binding protein 1                         | 8538                  | IPI00026052.1 | 90.789                      | 4                     |
| Heat shock protein 75 kDa, mitochondrial precursor          | 79961                 | IPI00030275.4 | 45.455                      | 22                    |
| Heat shock protein HSP 90-alpha                             | 98052                 | IPI00382470.2 | 37.939                      | 39                    |
| Heat shock protein HSP 90-beta                              | 83081                 | IPI00414676.5 | 59.336                      | 63                    |
| Heat shock protein, alpha-crystallin-related, B6            | 17141                 | IPI00022433.3 | 15                          | 2                     |
| Heat shock-related 70 kDa protein 2                         | 69978                 | IPI00007702.1 | 25.822                      | 18                    |
| Heat-shock protein beta-1                                   | 22768                 | IPI00025512.2 | 90.732                      | 21                    |
| Helicase SKI2W                                              | 137706                | IPI00328125.7 | 8.186                       | 6                     |
| Heme binding protein 1                                      | 21084                 | IPI00148063.1 | 61.905                      | 7                     |
| Heme oxygenase 1                                            | 32798                 | IPI00215893.8 | 24.653                      | 4                     |
| Heme oxygenase 2                                            | 36010                 | IPI00026824.1 | 23.734                      | 4                     |
| Hemoglobin alpha-1 globin chain                             | 15292                 | IPI00410714.1 | 44.366                      | 5                     |
| Hemoglobin beta chain                                       | 15857                 | IPI00218816.5 | 38.356                      | 4                     |
| Hep27-like protein                                          | 29512                 | IPI00106913.2 | 35.252                      | 4                     |
| Hepatitis B virus x-interacting protein                     | 18147                 | IPI00012831.2 | 17.341                      | 2                     |
| Hepatoma-derived growth factor                              | 28247                 | IPI00514127.1 | 58.594                      | 13                    |
| Hepatoma-derived growth factor-related protein 2, isoform 2 | 74771                 | IPI00013290.4 | 11.243                      | 5                     |
| Heterogeneous nuclear ribonucleoprotein A0                  | 30822                 | IPI00011913.1 | 39.344                      | 12                    |
| Heterogeneous nuclear ribonucleoprotein A1 isoform b        | 38723                 | IPI00215965.1 | 56.452                      | 14                    |
| Heterogeneous nuclear ribonucleoprotein F                   | 45643                 | IPI00003881.3 | 51.807                      | 12                    |
| Heterogeneous nuclear ribonucleoprotein G                   | 42306                 | IPI00304692.1 | 15.345                      | 9                     |
| Heterogeneous nuclear ribonucleoprotein H'                  | 49232                 | IPI00026230.1 | 27.394                      | 8                     |
| Heterogeneous nuclear ribonucleoprotein H1                  | 49198                 | IPI00013881.5 | 43.43                       | 14                    |
| Heterogeneous nuclear ribonucleoprotein K                   | 47528                 | IPI00514561.1 | 50.701                      | 28                    |
| Heterogeneous nuclear ribonucleoprotein L isoform a         | 64092                 | IPI00027834.3 | 71.307                      | 25                    |

| Protein Description                                               | Molecular Weight (Da) | IPI Number    | Total Sequence Coverage (%) | Total Unique Peptides |
|-------------------------------------------------------------------|-----------------------|---------------|-----------------------------|-----------------------|
| Heterogeneous nuclear ribonucleoprotein M isoform a               | 77464                 | IPI00171903.1 | 60.959                      | 34                    |
| Hexokinase domain containing 1                                    | 102478                | IPI00414612.2 | 2.29                        | 2                     |
| High mobility group AT-Hook 1 isoform a                           | 11669                 | IPI00179700.3 | 23.364                      | 2                     |
| High mobility group AT-Hook 1 isoform b                           | 10673                 | IPI00177716.5 | 32.292                      | 4                     |
| High mobility group protein 1                                     | 24747                 | IPI00419258.3 | 39.252                      | 15                    |
| High mobility group protein 2                                     | 23888                 | IPI00219097.3 | 33.173                      | 12                    |
| High mobility group protein 4                                     | 22771                 | IPI00217477.3 | 39.698                      | 7                     |
| High-mobility group nucleosome binding domain 1                   | 10683                 | IPI00220371.4 | 68                          | 7                     |
| High-mobility group nucleosome binding domain 3                   | 10660                 | IPI00018842.2 | 65.657                      | 7                     |
| HINT4                                                             | 20362                 | IPI00170924.1 | 23.626                      | 3                     |
| Histidine triad nucleotide-binding protein 1                      | 13662                 | IPI00239077.4 | 70.4                        | 9                     |
| Histidine triad nucleotide-binding protein 2                      | 17151                 | IPI00000335.1 | 41.718                      | 4                     |
| Histidyl-tRNA synthetase                                          | 57374                 | IPI00021808.3 | 26.326                      | 10                    |
| Histone deacetylase 1                                             | 55068                 | IPI00013774.1 | 25.519                      | 7                     |
| Histone deacetylase 2                                             | 55290                 | IPI00289601.8 | 5.123                       | 2                     |
| Histone deacetylase 6                                             | 131348                | IPI00005711.2 | 2.222                       | 2                     |
| Histone H1.0                                                      | 20719                 | IPI00550239.3 | 32.124                      | 11                    |
| Histone H1.1                                                      | 21698                 | IPI00217469.2 | 24.299                      | 2                     |
| Histone H1.2                                                      | 21221                 | IPI00217465.4 | 46.698                      | 21                    |
| Histone H1.3                                                      | 22205                 | IPI00217466.2 | 27.273                      | 7                     |
| Histone H1.4                                                      | 21721                 | IPI00217467.2 | 19.266                      | 5                     |
| Histone H1.5                                                      | 22435                 | IPI00217468.2 | 17.333                      | 4                     |
| Histone H1x                                                       | 22474                 | IPI00021924.1 | 27.7                        | 6                     |
| Histone H2A                                                       | 13987                 | IPI00216730.1 | 66.923                      | 12                    |
| Histone H2A.F/Z variant                                           | 13501                 | IPI00018278.1 | 53.906                      | 10                    |
| Histone H2A.o                                                     | 13956                 | IPI00216457.6 | 54.264                      | 11                    |
| Histone H2A.x                                                     | 15004                 | IPI00219037.4 | 47.887                      | 6                     |
| Histone H2B.b                                                     | 13797                 | IPI00152906.5 | 84                          | 23                    |
| Histone H2B.q                                                     | 13781                 | IPI00003935.5 | 29.6                        | 4                     |
| Histone H3                                                        | 15379                 | IPI00171611.5 | 56.618                      | 6                     |
| Histone H4                                                        | 11229                 | IPI00453473.3 | 71.569                      | 22                    |
| HIV-1 induced protein HIN-1 isoform 1                             | 116881                | IPI00399254.1 | 5.63                        | 3                     |
| HLA class I histocompatibility antigen, B-7 alpha chain precursor | 40435                 | IPI00004657.1 | 36.74                       | 12                    |
| HLA class II histocompatibility antigen, DR alpha chain precursor | 28589                 | IPI00005171.1 | 18.898                      | 4                     |
| HLA class II histocompatibility antigen, DW2.2/DR2.2 beta chain   | 22950                 | IPI00472169.1 | 25.758                      | 4                     |
| Hlark                                                             | 40914                 | IPI00003704.1 | 11.475                      | 2                     |
| HMG20A                                                            | 40119                 | IPI00018924.1 | 8.646                       | 2                     |

| Protein Description                                      | Molecular Weight (Da) | IPI Number    | Total Sequence Coverage (%) | Total Unique Peptides |
|----------------------------------------------------------|-----------------------|---------------|-----------------------------|-----------------------|
| HN1 protein                                              | 16005                 | IPI00007764.1 | 25.974                      | 2                     |
| HNRPC protein                                            | 27804                 | IPI00552125.1 | 55.6                        | 24                    |
| HNRPR protein                                            | 71170                 | IPI00012074.2 | 34.434                      | 26                    |
| HNRPUL1 protein                                          | 90236                 | IPI00167147.1 | 24.129                      | 13                    |
| HNYA                                                     | 47317                 | IPI00099996.1 | 6.948                       | 2                     |
| Homogentisate 1,2-dioxygenase                            | 49941                 | IPI00303174.1 | 9.438                       | 2                     |
| Hook homolog 1                                           | 84595                 | IPI00026305.1 | 11.676                      | 6                     |
| Hook homolog 3                                           | 83074                 | IPI00031768.1 | 10.028                      | 5                     |
| HP1-BP74                                                 | 61169                 | IPI00549250.1 | 35.262                      | 24                    |
| HPBR11-4 mRNA                                            | 59172                 | IPI00012998.1 | 14.882                      | 6                     |
| HRIHFB2072 protein                                       | 14023                 | IPI00000184.2 | 45.6                        | 3                     |
| Hrs                                                      | 86138                 | IPI00006176.3 | 13.256                      | 9                     |
| HS1-binding protein                                      | 31601                 | IPI00010440.4 | 21.505                      | 3                     |
| HSAJ1454                                                 | 49397                 | IPI00419590.1 | 7.339                       | 2                     |
| Hsc70-interacting protein                                | 41305                 | IPI00032826.1 | 26.287                      | 9                     |
| HSCARG                                                   | 33323                 | IPI00180145.3 | 16.722                      | 4                     |
| HSCO protein                                             | 27855                 | IPI00003766.4 | 24.803                      | 4                     |
| HSD-33                                                   | 46365                 | IPI00418446.3 | 28.954                      | 12                    |
| HSDL2 protein                                            | 37296                 | IPI00031107.1 | 24.058                      | 7                     |
| Hsp90 co-chaperone Cdc37                                 | 44440                 | IPI00013122.1 | 39.683                      | 15                    |
| HSPC032                                                  | 33309                 | IPI00003833.3 | 25.413                      | 8                     |
| HSPC117                                                  | 55175                 | IPI00337814.2 | 42.376                      | 18                    |
| HSPC121                                                  | 44394                 | IPI00008998.1 | 19.035                      | 4                     |
| HSPC148                                                  | 26594                 | IPI00009009.3 | 15.721                      | 2                     |
| HSPC230                                                  | 27924                 | IPI00009418.3 | 19.583                      | 3                     |
| HSPC300                                                  | 12368                 | IPI00000296.1 | 26.364                      | 3                     |
| HSPC326                                                  | 35841                 | IPI00000213.1 | 21.362                      | 3                     |
| HSRBC protein                                            | 27625                 | IPI00056334.1 | 47.893                      | 9                     |
| HSRG1849                                                 | 48888                 | IPI00419643.1 | 15.217                      | 7                     |
| HTATSF1 protein                                          | 85801                 | IPI00013788.1 | 4.636                       | 3                     |
| Huntingtin                                               | 347639                | IPI00002335.1 | 0.954                       | 3                     |
| Huntingtin interacting protein 1                         | 116148                | IPI00220730.6 | 7.907                       | 4                     |
| Huntingtin interacting protein 1 related                 | 119315                | IPI00024417.1 | 33.895                      | 27                    |
| Huntingtin interacting protein 2                         | 22393                 | IPI00021370.1 | 14.5                        | 3                     |
| Hyaluronan binding protein 4                             | 45758                 | IPI00018583.3 | 5.811                       | 2                     |
| Hydroxyacylglutathione hydrolase                         | 28842                 | IPI00003933.1 | 26.923                      | 7                     |
| Hydroxymethylglutaryl-CoA lyase, mitochondrial precursor | 34338                 | IPI00293564.5 | 13.231                      | 4                     |

| Protein Description                                         | Molecular Weight (Da) | IPI Number    | Total Sequence Coverage (%) | Total Unique Peptides |
|-------------------------------------------------------------|-----------------------|---------------|-----------------------------|-----------------------|
| Hydroxymethylglutaryl-CoA synthase, cytoplasmic             | 57257                 | IPI00008475.1 | 12.692                      | 3                     |
| Hydroxymethylglutaryl-CoA synthase, mitochondrial precursor | 56599                 | IPI00008934.1 | 9.055                       | 2                     |
| Hypothetical protein                                        | 41651                 | IPI00045536.1 | 28.729                      | 8                     |
| Hypothetical protein                                        | 27318                 | IPI00014197.1 | 51.938                      | 7                     |
| Hypothetical protein                                        | 164563                | IPI00240812.2 | 8.086                       | 7                     |
| Hypothetical protein                                        | 51232                 | IPI00168878.1 | 22.979                      | 5                     |
| Hypothetical protein                                        | 48495                 | IPI00217053.5 | 15.302                      | 5                     |
| Hypothetical protein                                        | 94989                 | IPI00419692.1 | 7.309                       | 5                     |
| Hypothetical protein                                        | 23823                 | IPI00010402.2 | 30.973                      | 4                     |
| Hypothetical protein                                        | 20621                 | IPI00165652.1 | 29.016                      | 3                     |
| Hypothetical protein                                        | 31424                 | IPI00180637.4 | 19.485                      | 3                     |
| Hypothetical protein                                        | 46869                 | IPI00103654.1 | 11.271                      | 3                     |
| Hypothetical protein                                        | 80866                 | IPI00044765.2 | 6.767                       | 3                     |
| Hypothetical protein                                        | 103623                | IPI00470582.2 | 5.902                       | 3                     |
| Hypothetical protein                                        | 14017                 | IPI00166684.2 | 23.333                      | 2                     |
| Hypothetical protein                                        | 32856                 | IPI00387103.1 | 10.265                      | 2                     |
| Hypothetical protein                                        | 57620                 | IPI00217661.1 | 9.982                       | 2                     |
| Hypothetical protein                                        | 29927                 | IPI00376481.1 | 9.818                       | 2                     |
| Hypothetical protein                                        | 91919                 | IPI00293161.1 | 2.604                       | 2                     |
| Hypothetical protein ABCF3                                  | 79695                 | IPI00465160.3 | 21.016                      | 7                     |
| Hypothetical protein C12orf5                                | 30043                 | IPI00006907.1 | 8.148                       | 2                     |
| Hypothetical protein DKFZp313B047                           | 170536                | IPI00013452.7 | 32.011                      | 38                    |
| Hypothetical protein DKFZp313K0719                          | 37145                 | IPI00456965.3 | 13.456                      | 3                     |
| Hypothetical protein DKFZp313M1333                          | 26407                 | IPI00102897.3 | 11.864                      | 3                     |
| Hypothetical protein DKFZp434C2415                          | 44834                 | IPI00015736.3 | 21.782                      | 6                     |
| Hypothetical protein DKFZp434N1923                          | 39924                 | IPI00008941.1 | 9.302                       | 2                     |
| Hypothetical protein DKFZp451D234                           | 109119                | IPI00031583.2 | 42.24                       | 33                    |
| Hypothetical protein DKFZp451I106                           | 166775                | IPI00001580.2 | 6.563                       | 6                     |
| Hypothetical protein DKFZp451M1911                          | 63832                 | IPI00396131.2 | 7.692                       | 2                     |
| Hypothetical protein DKFZp451P021                           | 117821                | IPI00023647.2 | 9.791                       | 5                     |
| Hypothetical protein DKFZp547F213                           | 46855                 | IPI00026638.2 | 11.033                      | 2                     |
| Hypothetical protein DKFZp564C246                           | 54447                 | IPI00295598.3 | 8.368                       | 3                     |
| Hypothetical protein DKFZp564D1378                          | 28518                 | IPI00300285.3 | 25.483                      | 5                     |
| Hypothetical protein DKFZp564I206                           | 33475                 | IPI00023086.2 | 31.757                      | 7                     |
| Hypothetical protein DKFZp564O2082                          | 28705                 | IPI00022963.3 | 16.872                      | 2                     |
| Hypothetical protein DKFZp566B1046                          | 37924                 | IPI00100192.3 | 20.238                      | 6                     |
| Hypothetical protein DKFZp566G013                           | 11421                 | IPI00455369.1 | 59.223                      | 7                     |



| Protein Description                 | Molecular Weight (Da) | IPI Number    | Total Sequence Coverage (%) | Total Unique Peptides |
|-------------------------------------|-----------------------|---------------|-----------------------------|-----------------------|
| Hypothetical protein DKFZp566G1246  | 30500                 | IPI00220945.4 | 25.795                      | 4                     |
| Hypothetical protein DKFZP566N034   | 31449                 | IPI00152253.1 | 7.612                       | 2                     |
| Hypothetical protein DKFZp566N1646  | 139772                | IPI00178187.1 | 3.818                       | 2                     |
| Hypothetical protein DKFZp586C1924  | 21513                 | IPI00031064.1 | 24.103                      | 2                     |
| Hypothetical protein DKFZp586K2222  | 32658                 | IPI00000230.5 | 17.958                      | 4                     |
| Hypothetical protein DKFZp667H197   | 100097                | IPI00107570.2 | 5.975                       | 5                     |
| Hypothetical protein DKFZp686A01246 | 90044                 | IPI00030828.2 | 10.599                      | 5                     |
| Hypothetical protein DKFZp686A0439  | 73564                 | IPI00448751.2 | 47.766                      | 25                    |
| Hypothetical protein DKFZp686B146   | 214058                | IPI00029778.2 | 6.829                       | 7                     |
| Hypothetical protein DKFZp686B19246 | 147177                | IPI00303063.6 | 9.217                       | 6                     |
| Hypothetical protein DKFZp686C0249  | 101234                | IPI00163644.2 | 5.393                       | 2                     |
| Hypothetical protein DKFZp686C1054  | 48460                 | IPI00465054.1 | 12.073                      | 4                     |
| Hypothetical protein DKFZp686C2251  | 241468                | IPI00470478.1 | 2.649                       | 3                     |
| Hypothetical protein DKFZp686D22204 | 119813                | IPI00413456.1 | 5.051                       | 4                     |
| Hypothetical protein DKFZp686E1950  | 117994                | IPI00418336.2 | 6.232                       | 3                     |
| Hypothetical protein DKFZp686F1544  | 80118                 | IPI00375652.1 | 3.841                       | 2                     |
| Hypothetical protein DKFZp686F1612  | 94578                 | IPI00027443.4 | 15.403                      | 10                    |
| Hypothetical protein DKFZp686H22247 | 152494                | IPI00374029.5 | 4.705                       | 3                     |
| Hypothetical protein DKFZp686I04222 | 46340                 | IPI00413451.1 | 42.054                      | 14                    |
| Hypothetical protein DKFZp686J13163 | 36277                 | IPI00470475.1 | 22.43                       | 4                     |
| Hypothetical protein DKFZp686J1375  | 54142                 | IPI00375843.1 | 8.214                       | 3                     |
| Hypothetical protein DKFZp686K2075  | 117685                | IPI00030940.3 | 7.102                       | 6                     |
| Hypothetical protein DKFZp686L08245 | 111655                | IPI00167111.2 | 7.15                        | 5                     |
| Hypothetical protein DKFZp686L1653  | 182362                | IPI00385001.1 | 2.196                       | 2                     |
| Hypothetical protein DKFZp686L17106 | 193961                | IPI00328115.2 | 1.583                       | 2                     |
| Hypothetical protein DKFZp686M09245 | 61559                 | IPI00298520.3 | 44.384                      | 20                    |
| Hypothetical protein DKFZp686M1045  | 155141                | IPI00218093.4 | 8.927                       | 6                     |
| Hypothetical protein DKFZp686M21196 | 58545                 | IPI00386700.3 | 37.358                      | 16                    |
| Hypothetical protein DKFZp686O0870  | 238031                | IPI00414481.2 | 0.9                         | 2                     |
| Hypothetical protein DKFZp727A151   | 70725                 | IPI00329625.1 | 7.765                       | 2                     |
| Hypothetical protein DKFZp761B107   | 30673                 | IPI00296473.5 | 15.73                       | 3                     |
| Hypothetical protein DKFZp761H2016  | 72496                 | IPI00023785.3 | 30.982                      | 19                    |
| Hypothetical protein DKFZp761I172   | 52043                 | IPI00027778.3 | 9.957                       | 2                     |
| Hypothetical protein DKFZp761I2217  | 102838                | IPI00554587.1 | 31.961                      | 21                    |
| Hypothetical protein DKFZp762P042   | 124515                | IPI00178072.5 | 15.577                      | 9                     |
| Hypothetical protein DKFZp779B0247  | 90498                 | IPI00398121.3 | 16.605                      | 12                    |
| Hypothetical protein DKFZp781I1117  | 60379                 | IPI00159072.2 | 15.771                      | 6                     |

| Protein Description                | Molecular Weight (Da) | IPI Number    | Total Sequence Coverage (%) | Total Unique Peptides |
|------------------------------------|-----------------------|---------------|-----------------------------|-----------------------|
| Hypothetical protein DKFZp781I1455 | 118905                | IPI00553043.1 | 8.515                       | 4                     |
| Hypothetical protein DKFZp781K1356 | 13554                 | IPI00412545.4 | 65.517                      | 11                    |
| Hypothetical protein EIF3S9        | 92295                 | IPI00334191.5 | 15.99                       | 9                     |
| Hypothetical protein FLJ10005      | 55030                 | IPI00019996.1 | 7.045                       | 3                     |
| Hypothetical protein FLJ10702      | 21525                 | IPI00018871.1 | 38.172                      | 7                     |
| Hypothetical protein FLJ10856      | 40658                 | IPI00019381.3 | 9.141                       | 3                     |
| Hypothetical protein FLJ10948      | 28094                 | IPI00019485.5 | 16.858                      | 3                     |
| Hypothetical protein FLJ10996      | 67010                 | IPI00154668.3 | 4.522                       | 2                     |
| Hypothetical protein FLJ11051      | 54766                 | IPI00304716.4 | 6.625                       | 2                     |
| Hypothetical protein FLJ11273      | 31094                 | IPI00171002.2 | 13.869                      | 3                     |
| Hypothetical protein FLJ11342      | 33911                 | IPI00020075.3 | 37.908                      | 7                     |
| Hypothetical protein FLJ11619      | 52560                 | IPI00153055.3 | 18.062                      | 5                     |
| Hypothetical protein FLJ12118      | 62185                 | IPI00336016.3 | 11.17                       | 3                     |
| Hypothetical protein FLJ12240      | 54748                 | IPI00032263.3 | 9.703                       | 3                     |
| Hypothetical protein FLJ12443      | 59113                 | IPI00171626.3 | 7.116                       | 3                     |
| Hypothetical protein FLJ12618      | 50284                 | IPI00016458.1 | 7.991                       | 2                     |
| Hypothetical protein FLJ12910      | 51140                 | IPI00002270.3 | 8.163                       | 3                     |
| Hypothetical protein FLJ13071      | 61891                 | IPI00386418.3 | 27.951                      | 12                    |
| Hypothetical protein FLJ13081      | 72934                 | IPI00414458.3 | 4.517                       | 3                     |
| Hypothetical protein FLJ13092      | 20051                 | IPI00027397.3 | 34.211                      | 4                     |
| Hypothetical protein FLJ13194      | 19386                 | IPI00018627.1 | 23.077                      | 3                     |
| Hypothetical protein FLJ13488      | 65446                 | IPI00255552.3 | 5.709                       | 2                     |
| Hypothetical protein FLJ13968      | 28057                 | IPI00011996.1 | 15.041                      | 3                     |
| Hypothetical protein FLJ14038      | 41917                 | IPI00303568.3 | 33.422                      | 7                     |
| Hypothetical protein FLJ14198      | 13190                 | IPI00549809.2 | 16.667                      | 2                     |
| Hypothetical protein FLJ14257      | 42622                 | IPI00002496.1 | 24.289                      | 6                     |
| Hypothetical protein FLJ14347      | 28267                 | IPI00022300.4 | 17.213                      | 4                     |
| Hypothetical protein FLJ14456      | 147087                | IPI00165528.1 | 4.584                       | 4                     |
| Hypothetical protein FLJ14742      | 90487                 | IPI00045839.1 | 4.229                       | 2                     |
| Hypothetical protein FLJ14844      | 17260                 | IPI00412792.2 | 81.013                      | 9                     |
| Hypothetical protein FLJ14938      | 55838                 | IPI00024642.2 | 9.524                       | 3                     |
| Hypothetical protein FLJ16627      | 83841                 | IPI00442171.3 | 5.777                       | 2                     |
| Hypothetical protein FLJ16726      | 20359                 | IPI00442073.3 | 28.272                      | 5                     |
| Hypothetical protein FLJ20036      | 61088                 | IPI00020991.2 | 11.552                      | 4                     |
| Hypothetical protein FLJ20101      | 37698                 | IPI00014893.3 | 10.746                      | 3                     |
| Hypothetical protein FLJ20171      | 40083                 | IPI00184262.4 | 14.804                      | 2                     |
| Hypothetical protein FLJ20254      | 77172                 | IPI00465314.1 | 8.853                       | 3                     |

| Protein Description           | Molecular Weight (Da) | IPI Number    | Total Sequence Coverage (%) | Total Unique Peptides |
|-------------------------------|-----------------------|---------------|-----------------------------|-----------------------|
| Hypothetical protein FLJ20257 | 74310                 | IPI00021320.2 | 5.951                       | 3                     |
| Hypothetical protein FLJ20323 | 98764                 | IPI00301987.5 | 6.499                       | 4                     |
| Hypothetical protein FLJ20420 | 26136                 | IPI00015833.1 | 43.172                      | 14                    |
| Hypothetical protein FLJ20431 | 19320                 | IPI00335001.1 | 16.571                      | 2                     |
| Hypothetical protein FLJ20455 | 27609                 | IPI00016405.1 | 25.306                      | 4                     |
| Hypothetical protein FLJ20498 | 46558                 | IPI00005065.3 | 5.896                       | 2                     |
| Hypothetical protein FLJ20534 | 39411                 | IPI00016532.2 | 11.85                       | 2                     |
| Hypothetical protein FLJ20580 | 18037                 | IPI00016605.3 | 15.625                      | 2                     |
| Hypothetical protein FLJ20920 | 68123                 | IPI00304071.3 | 5.203                       | 2                     |
| Hypothetical protein FLJ21011 | 55464                 | IPI00329662.3 | 5.347                       | 2                     |
| Hypothetical protein FLJ21870 | 33384                 | IPI00253323.2 | 13.125                      | 3                     |
| Hypothetical protein FLJ21935 | 83740                 | IPI00414315.5 | 16.42                       | 5                     |
| Hypothetical protein FLJ22221 | 38926                 | IPI00184854.1 | 8.451                       | 2                     |
| Hypothetical protein FLJ22321 | 40211                 | IPI00012199.1 | 14.722                      | 4                     |
| Hypothetical protein FLJ22346 | 81826                 | IPI00028307.2 | 9.03                        | 4                     |
| Hypothetical protein FLJ23617 | 28025                 | IPI00383046.1 | 9.796                       | 2                     |
| Hypothetical protein FLJ23795 | 14117                 | IPI00152670.1 | 15.2                        | 2                     |
| Hypothetical protein FLJ23923 | 88260                 | IPI00396527.2 | 9.359                       | 4                     |
| Hypothetical protein FLJ25219 | 13967                 | IPI00059185.3 | 28.455                      | 3                     |
| Hypothetical protein FLJ25678 | 32530                 | IPI00017672.2 | 21.843                      | 4                     |
| Hypothetical protein FLJ30596 | 31696                 | IPI00043744.3 | 16.487                      | 3                     |
| Hypothetical protein FLJ30656 | 21746                 | IPI00410324.1 | 12.308                      | 2                     |
| Hypothetical protein FLJ30959 | 67238                 | IPI00043638.1 | 13.058                      | 4                     |
| Hypothetical protein FLJ30968 | 50426                 | IPI00043637.3 | 6.769                       | 2                     |
| Hypothetical protein FLJ31051 | 43057                 | IPI00043598.1 | 8.753                       | 2                     |
| Hypothetical protein FLJ31970 | 47039                 | IPI00028369.2 | 15.366                      | 4                     |
| Hypothetical protein FLJ32070 | 84023                 | IPI00293312.5 | 6.341                       | 3                     |
| Hypothetical protein FLJ32103 | 62125                 | IPI00250430.5 | 6.412                       | 2                     |
| Hypothetical protein FLJ32464 | 85631                 | IPI00065486.1 | 6.005                       | 2                     |
| Hypothetical protein FLJ32642 | 44313                 | IPI00302660.2 | 11.587                      | 3                     |
| Hypothetical protein FLJ32899 | 30326                 | IPI00384646.6 | 13.919                      | 2                     |
| Hypothetical protein FLJ33312 | 79393                 | IPI00301051.3 | 16.667                      | 7                     |
| Hypothetical protein FLJ34283 | 23283                 | IPI00168112.1 | 11.364                      | 2                     |
| Hypothetical protein FLJ35097 | 48584                 | IPI00554589.1 | 13.287                      | 4                     |
| Hypothetical protein FLJ35162 | 56758                 | IPI00465074.2 | 7.143                       | 3                     |
| Hypothetical protein FLJ36878 | 54141                 | IPI00167764.1 | 13.189                      | 4                     |
| Hypothetical protein FLJ38426 | 37197                 | IPI00167572.3 | 26.364                      | 7                     |

| Protein Description            | Molecular Weight (Da) | IPI Number    | Total Sequence Coverage (%) | Total Unique Peptides |
|--------------------------------|-----------------------|---------------|-----------------------------|-----------------------|
| Hypothetical protein FLJ39091  | 38474                 | IPI00167515.1 | 21.937                      | 5                     |
| Hypothetical protein FLJ39603  | 22691                 | IPI00513884.3 | 38.424                      | 4                     |
| Hypothetical protein FLJ41975  | 17468                 | IPI00446538.1 | 34.641                      | 4                     |
| Hypothetical protein FLJ42340  | 55522                 | IPI00446294.1 | 25.641                      | 7                     |
| Hypothetical protein FLJ45102  | 130708                | IPI00179437.5 | 4.518                       | 3                     |
| Hypothetical protein FLJ45505  | 34738                 | IPI00027799.2 | 12.418                      | 3                     |
| Hypothetical protein FLJ45525  | 53895                 | IPI00299571.4 | 51.423                      | 22                    |
| Hypothetical protein FLJ45893  | 132225                | IPI00418799.1 | 3.025                       | 2                     |
| Hypothetical protein FLJ46472  | 73931                 | IPI00443799.1 | 4.956                       | 2                     |
| Hypothetical protein FLJ46603  | 23397                 | IPI00397645.4 | 7.512                       | 4                     |
| Hypothetical protein FLJ46687  | 42831                 | IPI00477962.1 | 15.885                      | 4                     |
| Hypothetical protein FLJ46846  | 180575                | IPI00418700.1 | 8.46                        | 6                     |
| Hypothetical protein FLJ90143  | 52053                 | IPI00296197.1 | 11.28                       | 2                     |
| Hypothetical protein FLJ90159  | 31004                 | IPI00446874.3 | 13.194                      | 3                     |
| Hypothetical protein FLJ90162  | 25733                 | IPI00296190.3 | 8.297                       | 2                     |
| Hypothetical protein FLJ90173  | 34013                 | IPI00470674.3 | 30.82                       | 9                     |
| Hypothetical protein FLJ90226  | 35956                 | IPI00329606.1 | 38.462                      | 8                     |
| Hypothetical protein FLJ90251  | 62851                 | IPI00045764.2 | 7.13                        | 2                     |
| Hypothetical protein FLJ90478  | 56940                 | IPI00168336.1 | 5.567                       | 2                     |
| Hypothetical protein FLJ90697  | 47121                 | IPI00329600.3 | 30.07                       | 8                     |
| Hypothetical protein FLJ90742  | 40718                 | IPI00171445.1 | 11.634                      | 2                     |
| Hypothetical protein HSPC016   | 7062                  | IPI00006378.3 | 40.625                      | 3                     |
| Hypothetical protein JFP2      | 28569                 | IPI00065475.2 | 9.774                       | 2                     |
| Hypothetical protein KIAA0102  | 24833                 | IPI00220125.2 | 32.589                      | 8                     |
| Hypothetical protein KIAA0152  | 32214                 | IPI00029046.1 | 36.301                      | 7                     |
| Hypothetical protein KIAA0153  | 74356                 | IPI00029048.2 | 9.006                       | 4                     |
| Hypothetical protein KIAA0156  | 109865                | IPI00006025.1 | 9.346                       | 5                     |
| Hypothetical protein KIAA0776  | 89540                 | IPI00396421.2 | 20.655                      | 12                    |
| Hypothetical protein KIAA1185  | 63434                 | IPI00170935.1 | 24.014                      | 9                     |
| Hypothetical protein LOC115098 | 25820                 | IPI00060627.1 | 17.489                      | 4                     |
| Hypothetical protein LOC126208 | 40417                 | IPI00056880.5 | 10.471                      | 3                     |
| Hypothetical protein LOC162427 | 51364                 | IPI00254338.1 | 5.15                        | 2                     |
| Hypothetical protein LOC196463 | 65430                 | IPI00169285.3 | 11.885                      | 3                     |
| Hypothetical protein LOC285636 | 33599                 | IPI00374272.3 | 12.925                      | 2                     |
| Hypothetical protein LOC64744  | 46755                 | IPI00102856.3 | 5.128                       | 2                     |
| Hypothetical protein LOC90580  | 29215                 | IPI00157215.4 | 11.538                      | 2                     |
| Hypothetical protein LOC90624  | 11947                 | IPI00329321.3 | 24.038                      | 2                     |

| Protein Description                                                      | Molecular Weight (Da) | IPI Number    | Total Sequence Coverage (%) | Total Unique Peptides |
|--------------------------------------------------------------------------|-----------------------|---------------|-----------------------------|-----------------------|
| Hypothetical protein LOC91942                                            | 19844                 | IPI00031109.4 | 46.154                      | 5                     |
| Hypothetical protein LOC92689                                            | 60787                 | IPI00031670.3 | 17.94                       | 7                     |
| Hypothetical protein MGC14289                                            | 32923                 | IPI00062866.3 | 8                           | 2                     |
| Hypothetical protein MGC26818                                            | 21209                 | IPI00152199.3 | 15.657                      | 2                     |
| Hypothetical protein MGC2803                                             | 18408                 | IPI00031526.3 | 14.773                      | 2                     |
| Hypothetical protein MGC29816                                            | 50879                 | IPI00395463.3 | 9.272                       | 2                     |
| Hypothetical protein MGC49942                                            | 17889                 | IPI00373869.3 | 43.605                      | 4                     |
| Hypothetical protein MGC5352                                             | 27988                 | IPI00063242.3 | 13.333                      | 4                     |
| Hypothetical protein MGC5395                                             | 16180                 | IPI00031605.1 | 38                          | 2                     |
| Hypothetical protein MGC5508                                             | 26194                 | IPI00031697.1 | 9.465                       | 3                     |
| Hypothetical protein PD2                                                 | 59939                 | IPI00300333.3 | 3.955                       | 2                     |
| Hypothetical protein PRO1855                                             | 34909                 | IPI00396321.1 | 34.202                      | 11                    |
| Hypothetical protein PSEC0072                                            | 38997                 | IPI00168884.2 | 25.143                      | 5                     |
| Hypothetical protein PSEC0098                                            | 23792                 | IPI00171421.1 | 24.519                      | 3                     |
| Hypothetical protein PSEC0119                                            | 61605                 | IPI00465308.1 | 8.288                       | 2                     |
| Hypothetical protein PSEC0197                                            | 64090                 | IPI00166395.1 | 7.292                       | 3                     |
| Hypothetical protein PSEC0198                                            | 37517                 | IPI00166394.1 | 11.662                      | 3                     |
| Hypothetical protein PSEC0241                                            | 71590                 | IPI00168262.1 | 6.592                       | 3                     |
| Hypothetical zinc finger protein KIAA1196                                | 97202                 | IPI00074893.1 | 2.803                       | 2                     |
| Hypoxanthine-guanine phosphoribosyltransferase                           | 24433                 | IPI00218493.6 | 50.691                      | 8                     |
| IkappaB kinase complex-associated protein                                | 150096                | IPI00293735.1 | 2.027                       | 2                     |
| Immature colon carcinoma transcript 1                                    | 23615                 | IPI00029114.1 | 12.621                      | 2                     |
| Immunoglobulin-binding protein 1                                         | 39198                 | IPI00019148.1 | 11.209                      | 2                     |
| Import inner membrane translocase subunit TIM44, mitochondrial precursor | 51323                 | IPI00306516.1 | 25.221                      | 11                    |
| Importin 7                                                               | 119440                | IPI00007402.1 | 3.083                       | 2                     |
| Importin 9                                                               | 115889                | IPI00185146.3 | 5.187                       | 3                     |
| Importin beta-1 subunit                                                  | 97108                 | IPI00001639.2 | 22.374                      | 16                    |
| Importin beta-3                                                          | 125864                | IPI00329200.4 | 8.594                       | 6                     |
| Inhibitor of apoptosis stimulating protein of p53                        | 89036                 | IPI00439948.2 | 4.469                       | 3                     |
| Inhibitor of kappaB kinase gamma                                         | 55751                 | IPI00002411.2 | 7.392                       | 2                     |
| INM02                                                                    | 28345                 | IPI00384722.1 | 10.902                      | 2                     |
| Inner nuclear membrane protein Man1                                      | 99935                 | IPI00032491.1 | 5.708                       | 3                     |
| Inorganic pyrophosphatase                                                | 32639                 | IPI00015018.1 | 53.287                      | 15                    |
| Inosine triphosphate pyrophosphatase                                     | 21432                 | IPI00018783.1 | 35.052                      | 4                     |
| Inosine-5'-monophosphate dehydrogenase 2                                 | 55770                 | IPI00291510.3 | 31.518                      | 16                    |
| Inositol 1,4,5-trisphosphate receptor type 3                             | 303844                | IPI00291607.1 | 6.327                       | 10                    |
| Inositol monophosphatase                                                 | 30169                 | IPI00020906.1 | 31.769                      | 8                     |

| Protein Description                                                   | Molecular Weight (Da) | IPI Number    | Total Sequence Coverage (%) | Total Unique Peptides |
|-----------------------------------------------------------------------|-----------------------|---------------|-----------------------------|-----------------------|
| Inositol monophosphatase 2                                            | 31301                 | IPI00023635.1 | 12.847                      | 3                     |
| Inositol polyphosphate 1-phosphatase                                  | 43970                 | IPI00027139.1 | 19.549                      | 3                     |
| Insulin precursor                                                     | 11973                 | IPI00001508.1 | 78.182                      | 21                    |
| Insulin receptor tyrosine kinase substrate                            | 56847                 | IPI00179326.7 | 8.219                       | 2                     |
| Insulin-degrading enzyme                                              | 117815                | IPI00220373.3 | 6.287                       | 3                     |
| Insulin-like growth factor binding protein 2 precursor                | 35114                 | IPI00297284.1 | 16.463                      | 3                     |
| Insulin-like growth factor binding protein 3 precursor                | 31640                 | IPI00018305.1 | 6.186                       | 2                     |
| Insulin-like growth factor binding protein 5 precursor                | 30550                 | IPI00029236.1 | 22.426                      | 6                     |
| Insulin-like growth factor binding protein 7 precursor                | 29111                 | IPI00016915.1 | 12.411                      | 2                     |
| Insulinoma-glucagonoma protein 20                                     | 183152                | IPI00103536.1 | 1.7                         | 2                     |
| Integrin alpha-2 precursor                                            | 129214                | IPI00013744.1 | 5.927                       | 4                     |
| Integrin alpha-V precursor                                            | 115978                | IPI00027505.1 | 20.038                      | 12                    |
| Integrin beta-5 precursor                                             | 87996                 | IPI00029741.1 | 3.504                       | 2                     |
| Integrin-linked protein kinase 1                                      | 51386                 | IPI00013219.1 | 7.743                       | 3                     |
| Intercellular adhesion molecule-1 precursor                           | 57790                 | IPI00008494.3 | 9.398                       | 3                     |
| Interferon regulatory factor 2 binding protein 2                      | 60987                 | IPI00376199.2 | 14.991                      | 4                     |
| Interferon-induced guanylate-binding protein 1                        | 67860                 | IPI00028564.1 | 5.236                       | 2                     |
| Interferon-induced guanylate-binding protein 2                        | 67140                 | IPI00028565.3 | 9.475                       | 4                     |
| Interferon-induced protein with tetratricopeptide repeats 3           | 55950                 | IPI00024254.3 | 2.857                       | 2                     |
| Interferon-regulated resistance GTP-binding protein MxA               | 75356                 | IPI00167949.5 | 10.59                       | 3                     |
| I-plastin                                                             | 70308                 | IPI00032304.1 | 19.396                      | 8                     |
| IQ motif containing GTPase activating protein 2                       | 180500                | IPI00299048.3 | 10.857                      | 10                    |
| IQSEC1 protein                                                        | 91941                 | IPI00006669.5 | 5.897                       | 3                     |
| Iron-responsive element binding protein 1                             | 98337                 | IPI00008485.1 | 33.858                      | 21                    |
| ISOC2 protein                                                         | 22323                 | IPI00551022.2 | 62.439                      | 8                     |
| Isocitrate dehydrogenase [NAD] subunit alpha, mitochondrial precursor | 39566                 | IPI00030702.1 | 43.169                      | 13                    |
| Isocitrate dehydrogenase [NAD] subunit gamma, mitochondrial precursor | 42767                 | IPI00220150.4 | 13.232                      | 3                     |
| Isocitrate dehydrogenase [NADP] cytoplasmic                           | 46630                 | IPI00027223.2 | 68.599                      | 26                    |
| Isocitrate dehydrogenase [NADP], mitochondrial precursor              | 50877                 | IPI00011107.2 | 42.478                      | 21                    |
| Isoleucyl-tRNA synthetase, cytoplasmic                                | 144866                | IPI00013234.1 | 14.771                      | 16                    |
| Isopentenyl-dlphosphate delta Isomerase                               | 32465                 | IPI00220014.2 | 11.972                      | 3                     |
| Isovaleryl-CoA dehydrogenase, mitochondrial precursor                 | 46290                 | IPI00032297.1 | 24.586                      | 7                     |
| ITBA2 protein                                                         | 14795                 | IPI00032314.2 | 39.86                       | 2                     |
| JKTBP2                                                                | 46409                 | IPI00011274.1 | 34.048                      | 13                    |
| JM1 protein                                                           | 70712                 | IPI00022265.3 | 26.316                      | 10                    |
| JNK-associated leucine-zipper protein                                 | 145046                | IPI00218097.1 | 10.069                      | 7                     |
| Junctional adhesion molecule 1 precursor                              | 32562                 | IPI00001754.1 | 7.023                       | 2                     |

| Protein Description                                                     | Molecular Weight (Da) | IPI Number    | Total Sequence Coverage (%) | Total Unique Peptides |
|-------------------------------------------------------------------------|-----------------------|---------------|-----------------------------|-----------------------|
| KARP-1-binding protein                                                  | 164439                | IPI00186194.3 | 1.413                       | 2                     |
| KAT protein                                                             | 13181                 | IPI00168904.2 | 54.098                      | 4                     |
| Keratin 18                                                              | 48029                 | IPI00220985.6 | 81.628                      | 53                    |
| Keratin 19                                                              | 44079                 | IPI00479145.1 | 92                          | 50                    |
| Keratin 8                                                               | 53717                 | IPI00418411.2 | 66.667                      | 34                    |
| Keratin, type I cytoskeletal 16                                         | 51105                 | IPI00217963.2 | 6.356                       | 2                     |
| Keratin, type I cytoskeletal 17                                         | 47945                 | IPI00450768.4 | 11.137                      | 5                     |
| Keratin, type I cytoskeletal 23                                         | 48038                 | IPI00304458.1 | 24.645                      | 8                     |
| Keratin, type II cytoskeletal 1                                         | 65847                 | IPI00220327.2 | 3.733                       | 2                     |
| Keratin, type II cytoskeletal 5                                         | 62409                 | IPI00009867.2 | 12.034                      | 6                     |
| Keratin, type II cytoskeletal 6B                                        | 59831                 | IPI00293665.6 | 13.677                      | 6                     |
| Keratin, type II cytoskeletal 7                                         | 51255                 | IPI00306959.7 | 63.034                      | 32                    |
| Keratin, type II cytoskeletal 8                                         | 53510                 | IPI00554648.1 | 71.992                      | 36                    |
| Ketosamine-3-kinase                                                     | 34390                 | IPI00099986.5 | 9.709                       | 4                     |
| KHSRP protein                                                           | 72851                 | IPI00479786.1 | 38.31                       | 22                    |
| KIAA0062 protein                                                        | 58379                 | IPI00014236.4 | 6.215                       | 2                     |
| KIAA0066 protein                                                        | 110454                | IPI00014235.1 | 16.004                      | 10                    |
| KIAA0157 protein                                                        | 34798                 | IPI00299517.2 | 6.431                       | 2                     |
| KIAA0170 protein                                                        | 226595                | IPI00291929.3 | 1.77                        | 2                     |
| KIAA0251 protein                                                        | 86653                 | IPI00384689.2 | 26.523                      | 13                    |
| KIAA0291; similar rodent cytoplasmic linker protein CLIP-115 and restin | 115767                | IPI00019642.1 | 5.354                       | 4                     |
| KIAA0372                                                                | 175375                | IPI00005634.3 | 3.453                       | 5                     |
| KIAA0564 protein isoform a                                              | 214689                | IPI00158296.2 | 5.354                       | 8                     |
| KIAA0676 protein isoform a                                              | 140436                | IPI00307257.2 | 4.96                        | 4                     |
| KIAA0685 protein                                                        | 101182                | IPI00375638.4 | 5.794                       | 3                     |
| KIAA0690                                                                | 143611                | IPI00101186.4 | 6.476                       | 5                     |
| KIAA0731 protein                                                        | 123434                | IPI00185919.3 | 10.31                       | 7                     |
| KIAA0747 protein                                                        | 122780                | IPI00022143.3 | 26.268                      | 21                    |
| KIAA0804 protein isoform a                                              | 161650                | IPI00464985.3 | 1.821                       | 2                     |
| KIAA0977 protein                                                        | 132004                | IPI00007133.2 | 3.314                       | 3                     |
| KIAA1033 protein                                                        | 136316                | IPI00298991.4 | 2.984                       | 3                     |
| KIAA1048 protein                                                        | 97667                 | IPI00298977.4 | 15.831                      | 8                     |
| KIAA1124 protein                                                        | 199084                | IPI00005689.2 | 9.034                       | 10                    |
| KIAA1168 protein                                                        | 148160                | IPI00099473.1 | 9.368                       | 10                    |
| KIAA1228 protein                                                        | 98840                 | IPI00409635.1 | 8.287                       | 4                     |
| KIAA1244                                                                | 232669                | IPI00179164.2 | 4.558                       | 7                     |
| KIAA1295 protein                                                        | 60172                 | IPI00023832.1 | 4                           | 2                     |

| Protein Description                                   | Molecular Weight (Da) | IPI Number    | Total Sequence Coverage (%) | Total Unique Peptides |
|-------------------------------------------------------|-----------------------|---------------|-----------------------------|-----------------------|
| KIAA1363 protein                                      | 49031                 | IPI00002230.2 | 17.5                        | 6                     |
| KIAA1463 protein                                      | 171382                | IPI00465045.2 | 2.348                       | 2                     |
| KIAA1604 protein                                      | 85908                 | IPI00177381.5 | 2.807                       | 2                     |
| KIAA1626 protein                                      | 140718                | IPI00288962.1 | 6.464                       | 6                     |
| KIAA1802 protein                                      | 90082                 | IPI00064212.1 | 4.385                       | 3                     |
| KIAA2010 protein                                      | 103599                | IPI00217013.1 | 7.717                       | 5                     |
| Kinase-like protein                                   | 89575                 | IPI00102059.1 | 8.045                       | 3                     |
| Kinesin heavy chain                                   | 109617                | IPI00012837.1 | 52.544                      | 43                    |
| Kinesin heavy chain isoform 5C                        | 109427                | IPI00028561.1 | 29.781                      | 24                    |
| Kinesin light chain 2                                 | 68892                 | IPI00021634.3 | 29.743                      | 12                    |
| KINESIN-13A1                                          | 196962                | IPI00164861.2 | 2.049                       | 3                     |
| Kinesin-associated protein 3                          | 91146                 | IPI00515034.1 | 6.692                       | 3                     |
| Kinesin-like protein 8                                | 69285                 | IPI00398807.2 | 10.24                       | 4                     |
| Kinesin-like protein KIF1A                            | 190964                | IPI00300529.6 | 2.308                       | 3                     |
| Kinesin-like protein KIF3A                            | 80335                 | IPI00000455.4 | 13.818                      | 5                     |
| Kinesin-like protein KIF3B                            | 85073                 | IPI00004533.1 | 18.608                      | 10                    |
| KRT19 protein                                         | 46179                 | IPI00171834.3 | 11.429                      | 5                     |
| Kunitz-type protease inhibitor 2 precursor            | 28210                 | IPI00011662.1 | 21.429                      | 3                     |
| Kynureninase                                          | 52318                 | IPI00003818.1 | 14.839                      | 3                     |
| Kynurenine aminotransferase III                       | 51368                 | IPI00465373.1 | 11.894                      | 3                     |
| L23-related gene protein                              | 17770                 | IPI00293476.3 | 26.797                      | 2                     |
| La binding protein 1                                  | 79767                 | IPI00465429.1 | 7.91                        | 4                     |
| Lactotransferrin precursor                            | 78288                 | IPI00298860.3 | 5.063                       | 3                     |
| Lactoylglutathione lyase                              | 20575                 | IPI00220766.3 | 49.18                       | 5                     |
| Ladinin 1                                             | 57123                 | IPI00514234.1 | 4.449                       | 2                     |
| LAG1 longevity assurance homolog 2                    | 38495                 | IPI00305304.2 | 6.481                       | 2                     |
| Lambda-crystallin homolog                             | 34278                 | IPI00006443.1 | 11.29                       | 3                     |
| Lamin B receptor                                      | 70658                 | IPI00292135.1 | 5.366                       | 3                     |
| Lamin B1                                              | 66237                 | IPI00217975.3 | 42.051                      | 31                    |
| Lamin B2                                              | 67647                 | IPI00009771.4 | 54.667                      | 39                    |
| Lamina-associated polypeptide 2 isoform alpha         | 75315                 | IPI00216230.2 | 9.812                       | 2                     |
| Laminin beta-1 chain precursor                        | 197937                | IPI00013976.1 | 11.646                      | 10                    |
| Laminin beta-3 chain precursor                        | 129489                | IPI00299404.1 | 3.157                       | 3                     |
| Laminin gamma-1 chain precursor                       | 177492                | IPI00298281.3 | 7.769                       | 8                     |
| Lanosterol synthase                                   | 83255                 | IPI00009747.1 | 3.552                       | 2                     |
| LAP3 protein                                          | 56101                 | IPI00419237.1 | 36.802                      | 15                    |
| Large neutral amino acids transporter small subunit 1 | 54974                 | IPI00008986.1 | 3.156                       | 2                     |



| Protein Description                                                                                                  | Molecular Weight (Da) | IPI Number    | Total Sequence Coverage (%) | Total Unique Peptides |
|----------------------------------------------------------------------------------------------------------------------|-----------------------|---------------|-----------------------------|-----------------------|
| Large neutral amino acids transporter small subunit 2                                                                | 58344                 | IPI00296114.1 | 7.29                        | 2                     |
| Late endosomal/lysosomal Mp1 interacting protein                                                                     | 13499                 | IPI00032409.1 | 46.4                        | 2                     |
| Latexin                                                                                                              | 25753                 | IPI00106687.1 | 13.514                      | 2                     |
| Lens epithelium-derived growth factor p75                                                                            | 60067                 | IPI00028122.1 | 19.245                      | 7                     |
| LEREPO4 protein                                                                                                      | 48573                 | IPI00000279.2 | 11.737                      | 3                     |
| Leucine zipper protein                                                                                               | 30087                 | IPI00291893.3 | 10.039                      | 2                     |
| Leucine zipper transcription factor-like 1                                                                           | 34570                 | IPI00478250.3 | 18.395                      | 4                     |
| Leucine zipper transcription factor-like 1                                                                           | 34572                 | IPI00299465.6 | 10.702                      | 2                     |
| Leucine zipper-EF-hand containing transmembrane protein 1                                                            | 83302                 | IPI00017592.1 | 30.447                      | 15                    |
| Leucine-rich repeat protein SHOC-2                                                                                   | 64847                 | IPI00298928.1 | 3.78                        | 2                     |
| Leucine-rich repeat transmembrane protein FLRT3 precursor                                                            | 72957                 | IPI00002320.1 | 3.698                       | 2                     |
| Leucine-rich repeat-containing protein 8                                                                             | 94139                 | IPI00002070.4 | 3.457                       | 2                     |
| Leucine-rich repeats and calponin homology (CH) domain containing 3                                                  | 78753                 | IPI00396561.3 | 3.652                       | 2                     |
| Leucyl-tRNA synthetase, cytoplasmic                                                                                  | 134379                | IPI00103994.4 | 21.599                      | 16                    |
| Leukocyte elastase inhibitor                                                                                         | 42715                 | IPI00027444.1 | 62.533                      | 26                    |
| Leukophysin                                                                                                          | 24321                 | IPI00155723.3 | 36.596                      | 5                     |
| Leukotriene A4 hydroLase                                                                                             | 69241                 | IPI00219077.1 | 46.481                      | 21                    |
| L-fucose kinase                                                                                                      | 107209                | IPI00418741.5 | 8.081                       | 5                     |
| LIM and cysteine-rich domains protein 1                                                                              | 40806                 | IPI00303258.3 | 20.274                      | 6                     |
| LIM and SH3 domain protein 1                                                                                         | 29698                 | IPI00000861.1 | 58.621                      | 15                    |
| Limbic system-associated membrane protein precursor                                                                  | 37285                 | IPI00013303.1 | 4.142                       | 2                     |
| LIM-nebulette                                                                                                        | 31176                 | IPI00418240.1 | 23.704                      | 3                     |
| LIN-7 homolog C                                                                                                      | 21820                 | IPI00019997.1 | 32.995                      | 3                     |
| Lipoamide acyltransferase component of branched-chain alpha-keto acid dehydrogenase complex, mitochondrial precursor | 53453                 | IPI00003944.1 | 10.373                      | 4                     |
| Lipocalin 2                                                                                                          | 22774                 | IPI00299547.2 | 21                          | 4                     |
| Lipopolysaccharide-responsive and beige-like anchor protein                                                          | 318959                | IPI00002255.4 | 5.623                       | 12                    |
| LISCH protein, isoform 2                                                                                             | 71394                 | IPI00409640.1 | 7.242                       | 3                     |
| Lithostathine 1 alpha precursor                                                                                      | 18719                 | IPI00009027.1 | 53.614                      | 7                     |
| Lithostathine 1 beta precursor                                                                                       | 18653                 | IPI00009197.1 | 26.506                      | 4                     |
| Liver carboxylesterase 1 precursor                                                                                   | 62481                 | IPI00010180.3 | 48.325                      | 19                    |
| L-lactate dehydrogenase A chain                                                                                      | 36534                 | IPI00217966.4 | 52.266                      | 18                    |
| L-lactate dehydrogenase B chain                                                                                      | 36484                 | IPI00219217.2 | 39.339                      | 13                    |
| LLGL2 protein                                                                                                        | 113333                | IPI00465050.1 | 3.431                       | 3                     |
| LOC158931 protein                                                                                                    | 22285                 | IPI00056312.2 | 15                          | 2                     |
| LOC283377 protein                                                                                                    | 23084                 | IPI00291643.3 | 12.56                       | 2                     |
| LOC286257 protein                                                                                                    | 21626                 | IPI00030968.3 | 21.569                      | 4                     |

| Protein Description                                          | Molecular Weight (Da) | IPI Number    | Total Sequence Coverage (%) | Total Unique Peptides |
|--------------------------------------------------------------|-----------------------|---------------|-----------------------------|-----------------------|
| LOC493856 protein                                            | 15268                 | IPI00166865.3 | 31.111                      | 3                     |
| LOC63929 protein                                             | 56969                 | IPI00334597.3 | 11.243                      | 2                     |
| LOC93343 protein                                             | 28765                 | IPI00063217.5 | 13.187                      | 2                     |
| Lon protease homolog, mitochondrial precursor                | 106422                | IPI00005158.1 | 36.184                      | 25                    |
| Low-density lipoprotein receptor-related protein 1 precursor | 504245                | IPI00020557.1 | 0.484                       | 2                     |
| L-plastin                                                    | 70245                 | IPI00010471.1 | 17.544                      | 5                     |
| LPP                                                          | 65704                 | IPI00023704.1 | 13.889                      | 7                     |
| LRR FLI-I interacting protein 2                              | 82121                 | IPI00007277.1 | 12.899                      | 6                     |
| LUC7-like 2                                                  | 47591                 | IPI00006932.1 | 34.826                      | 13                    |
| Lung cancer oncogene 7                                       | 37865                 | IPI00013896.2 | 39.769                      | 12                    |
| Lupus La protein                                             | 46808                 | IPI00009032.1 | 53.431                      | 24                    |
| L-xylulose reductase                                         | 25897                 | IPI00448095.3 | 44.672                      | 6                     |
| Lymphocyte antigen                                           | 18517                 | IPI00552969.1 | 14.634                      | 2                     |
| LYRIC protein                                                | 63799                 | IPI00328715.4 | 36.426                      | 15                    |
| Lysophospholipase-like 1                                     | 26299                 | IPI00059762.3 | 20.675                      | 3                     |
| Lysosomal acid phosphatase precursor                         | 48285                 | IPI00003807.6 | 8.274                       | 2                     |
| Lysosomal alpha-glucosidase precursor                        | 105794                | IPI00293088.4 | 35.423                      | 25                    |
| Lysosomal Pro-X carboxypeptidase precursor                   | 55764                 | IPI00001593.1 | 10.887                      | 4                     |
| Lysosome membrane protein II                                 | 54124                 | IPI00217766.2 | 21.593                      | 9                     |
| Lysosome-associated membrane glycoprotein 1 precursor        | 44563                 | IPI00004503.3 | 14.458                      | 9                     |
| Lysozyme C precursor                                         | 16526                 | IPI00019038.1 | 14.189                      | 3                     |
| Lysyl oxidase homolog 4 precursor                            | 84429                 | IPI00306402.3 | 7.937                       | 4                     |
| Lysyl-tRNA synthetase                                        | 68005                 | IPI00014238.2 | 36.516                      | 16                    |
| Maba1                                                        | 111295                | IPI00295813.2 | 4.245                       | 4                     |
| Macrophage capping protein                                   | 38494                 | IPI00027341.1 | 16.954                      | 4                     |
| Macrophage migration inhibitory factor                       | 12337                 | IPI00293276.7 | 40.351                      | 4                     |
| Mago-nashi homolog                                           | 17265                 | IPI00059292.3 | 25                          | 3                     |
| MAGUK p55 subfamily member 6                                 | 61079                 | IPI00303280.4 | 15.185                      | 6                     |
| Major vault protein                                          | 99135                 | IPI00000105.3 | 68.049                      | 59                    |
| Malate dehydrogenase, cytoplasmic                            | 36272                 | IPI00291005.7 | 54.955                      | 18                    |
| Malate dehydrogenase, mitochondrial precursor                | 35509                 | IPI00291006.1 | 69.527                      | 30                    |
| Maleylacetoacetate isomerase                                 | 24167                 | IPI00013809.1 | 28.241                      | 3                     |
| Malonyl-CoA decarboxylase, mitochondrial precursor           | 54969                 | IPI00000663.1 | 5.68                        | 2                     |
| Mannose-6-phosphate isomerase                                | 46495                 | IPI00219358.2 | 13.981                      | 3                     |
| Mannosidase, alpha, class 2B, MeMber 1 precursor             | 113672                | IPI00012989.2 | 14.837                      | 10                    |
| Mannosyl-oligosaccharide 1,2-alpha-mannosidase IA            | 73021                 | IPI00291641.5 | 16.845                      | 8                     |
| Mannosyl-oligosaccharide 1,2-alpha-mannosidase IB            | 72957                 | IPI00009145.1 | 5.148                       | 2                     |

| Protein Description                                                            | Molecular Weight (Da) | IPI Number    | Total Sequence Coverage (%) | Total Unique Peptides |
|--------------------------------------------------------------------------------|-----------------------|---------------|-----------------------------|-----------------------|
| Mannosyl-oligosaccharide glucosidase                                           | 91851                 | IPI00328170.8 | 25.329                      | 13                    |
| MAP2 protein                                                                   | 58919                 | IPI00216900.1 | 38.998                      | 18                    |
| MARCKSL1 protein                                                               | 19521                 | IPI00220803.3 | 14.359                      | 2                     |
| MAT2B protein                                                                  | 37540                 | IPI00002324.2 | 23.353                      | 4                     |
| Matrin 3                                                                       | 94565                 | IPI00017297.1 | 44.392                      | 35                    |
| Matrix metalloproteinase-14 precursor                                          | 65842                 | IPI00218398.5 | 7.904                       | 4                     |
| MAWD binding protein                                                           | 31765                 | IPI00024896.2 | 31.597                      | 5                     |
| MBC3205                                                                        | 21184                 | IPI00063130.1 | 18.519                      | 4                     |
| Megakaryocyte stimulating factor                                               | 150998                | IPI00024825.1 | 4.701                       | 5                     |
| Membrane associated progesterone receptor component 1                          | 21527                 | IPI00220739.2 | 40.722                      | 6                     |
| Membrane associated progesterone receptor component 2                          | 23804                 | IPI00005202.1 | 29.596                      | 5                     |
| Membrane component, chromosome 11, surface marker 1, isoform 1                 | 78318                 | IPI00150961.2 | 21.439                      | 12                    |
| Membrane copper amine oxidase                                                  | 84568                 | IPI00004457.1 | 4.718                       | 3                     |
| Membrane protein                                                               | 21161                 | IPI00026111.2 | 15.426                      | 2                     |
| Metalloprotease 1                                                              | 117555                | IPI00219613.3 | 15.222                      | 12                    |
| Metalloproteinase inhibitor 1 precursor                                        | 23156                 | IPI00032292.1 | 7.246                       | 2                     |
| Metalloproteinase inhibitor 2 precursor                                        | 24383                 | IPI00027166.1 | 16.818                      | 3                     |
| Metastasis-associated protein MTA2                                             | 74976                 | IPI00171798.1 | 13.174                      | 4                     |
| Metaxin 1 isoform 1                                                            | 51445                 | IPI00013678.2 | 7.94                        | 3                     |
| Metaxin 2                                                                      | 29744                 | IPI00025717.1 | 23.574                      | 7                     |
| Methionine aminopeptidase 1                                                    | 43187                 | IPI00022239.7 | 6.218                       | 2                     |
| Methionine aminopeptidase 2                                                    | 52858                 | IPI00033036.1 | 10.46                       | 3                     |
| Methionyl-tRNA synthetase                                                      | 101052                | IPI00008240.2 | 21.556                      | 15                    |
| Methyl-CpG-binding protein 2                                                   | 52409                 | IPI00418234.3 | 39.3                        | 15                    |
| Methylcrotonoyl-CoA carboxylase alpha chain, mitochondrial precursor           | 80382                 | IPI00024580.3 | 19.724                      | 8                     |
| Methylmalonate-semialdehyde dehydrogenase [acylating], mitochondrial precursor | 57803                 | IPI00024990.6 | 19.813                      | 6                     |
| Methylmalonic aciduria type A protein, mitochondrial precursor                 | 46509                 | IPI00217023.1 | 7.416                       | 2                     |
| Methylmalonyl-CoA epiMerase                                                    | 18694                 | IPI00107722.3 | 46.023                      | 5                     |
| Methylmalonyl-CoA mutase, mitochondrial precursor                              | 83049                 | IPI00024934.3 | 23.867                      | 11                    |
| MGC10540 protein                                                               | 20735                 | IPI00031655.1 | 39.773                      | 3                     |
| MGC11257 protein                                                               | 22070                 | IPI00031651.1 | 14.433                      | 3                     |
| MGC16733 protein                                                               | 108102                | IPI00446765.1 | 2.7                         | 2                     |
| MGC29649 protein                                                               | 20000                 | IPI00175096.1 | 15.789                      | 2                     |
| MGC40499 protein                                                               | 28292                 | IPI00102962.2 | 11.29                       | 2                     |
| MGC52000 protein                                                               | 50494                 | IPI00328571.1 | 9.829                       | 3                     |
| MHC class II DR-beta precursor                                                 | 30011                 | IPI00449584.1 | 17.293                      | 4                     |

| Protein Description                                            | Molecular Weight (Da) | IPI Number    | Total Sequence Coverage (%) | Total Unique Peptides |
|----------------------------------------------------------------|-----------------------|---------------|-----------------------------|-----------------------|
| MHC class II lymphocyte antigen beta chain precursor           | 29111                 | IPI00472604.1 | 14.341                      | 2                     |
| MIC2L1 isoform E4                                              | 20288                 | IPI00152488.1 | 14.737                      | 2                     |
| Microsomal dipeptidase precursor                               | 45635                 | IPI00059476.4 | 8.029                       | 2                     |
| Microsomal glutathione S-transferase 3                         | 18405                 | IPI00024266.2 | 22.289                      | 2                     |
| Microsomal signal peptidase 12 kDa subunit                     | 11797                 | IPI00219755.6 | 34.314                      | 3                     |
| Microsomal signal peptidase 18 kDa subunit                     | 20612                 | IPI00104128.3 | 13.966                      | 3                     |
| Microsomal signal peptidase 21 kDa subunit                     | 21397                 | IPI00219436.2 | 21.99                       | 5                     |
| Microsomal signal peptidase 23 kDa subunit                     | 20766                 | IPI00300299.3 | 13.661                      | 2                     |
| Microtubule-associated protein 1A                              | 306749                | IPI00020356.3 | 3.422                       | 6                     |
| Microtubule-associated protein 1B                              | 270454                | IPI00008868.3 | 29.335                      | 52                    |
| Microtubule-associated protein RP/EB family member 1           | 29849                 | IPI00017596.2 | 61.798                      | 17                    |
| Microtubule-associated tau protein                             | 42925                 | IPI00220175.2 | 18.204                      | 4                     |
| Mid-1-related chloride channel 1                               | 61983                 | IPI00045511.1 | 7.078                       | 2                     |
| Mitochondrial 28S ribosomal protein S10                        | 22985                 | IPI00061245.4 | 26.368                      | 2                     |
| Mitochondrial 28S ribosomal protein S14                        | 15129                 | IPI00005050.1 | 21.875                      | 2                     |
| Mitochondrial 28S ribosomal protein S21                        | 10734                 | IPI00014812.1 | 32.184                      | 2                     |
| Mitochondrial 28S ribosomal protein S22                        | 41254                 | IPI00013146.1 | 17.222                      | 5                     |
| Mitochondrial 28S ribosomal protein S25                        | 20103                 | IPI00013167.1 | 19.653                      | 2                     |
| Mitochondrial 28S ribosomal protein S28                        | 20830                 | IPI00022276.3 | 22.995                      | 4                     |
| Mitochondrial 28S ribosomal protein S28                        | 36821                 | IPI00073779.1 | 15.17                       | 3                     |
| Mitochondrial 28S ribosomal protein S29                        | 45538                 | IPI00018120.1 | 31.658                      | 6                     |
| Mitochondrial 28S ribosomal protein S32                        | 16650                 | IPI00022320.1 | 14.789                      | 2                     |
| Mitochondrial 28S ribosomal protein S34                        | 25634                 | IPI00169413.1 | 26.606                      | 3                     |
| Mitochondrial 28S ribosomal protein S36                        | 11459                 | IPI00020495.1 | 61.165                      | 5                     |
| Mitochondrial 28S ribosomal protein S6                         | 14087                 | IPI00305668.6 | 29.839                      | 2                     |
| Mitochondrial 2-oxoglutarate/malate carrier protein            | 33909                 | IPI00219729.2 | 15.655                      | 2                     |
| Mitochondrial 39S ribosomal protein L27                        | 16063                 | IPI00009444.3 | 26.351                      | 3                     |
| Mitochondrial 39S ribosomal protein L3                         | 38608                 | IPI00012353.1 | 12.644                      | 2                     |
| Mitochondrial 39S ribosomal protein L49                        | 19186                 | IPI00013195.1 | 22.289                      | 3                     |
| Mitochondrial 39S ribosomal protein L50                        | 18313                 | IPI00329036.2 | 36.709                      | 3                     |
| Mitochondrial chaperone BCS1                                   | 47504                 | IPI00003985.1 | 8.115                       | 2                     |
| Mitochondrial glutamate carrier 1                              | 34448                 | IPI00003004.1 | 8.669                       | 2                     |
| Mitochondrial import inner membrane translocase subunit TIM10  | 10326                 | IPI00001543.1 | 16.667                      | 2                     |
| Mitochondrial import inner membrane translocase subunit TIM9 A | 10371                 | IPI00001541.1 | 52.809                      | 3                     |
| Mitochondrial import receptor subunit TOM22 homolog            | 15512                 | IPI00024976.3 | 42.958                      | 3                     |
| Mitochondrial import receptor subunit TOM34                    | 34538                 | IPI00009946.4 | 46.926                      | 10                    |
| Mitochondrial intermediate peptidase, mitochondrial precursor  | 80560                 | IPI00241860.3 | 4.909                       | 2                     |

| Protein Description                                                       | Molecular Weight (Da) | IPI Number    | Total Sequence Coverage (%) | Total Unique Peptides |
|---------------------------------------------------------------------------|-----------------------|---------------|-----------------------------|-----------------------|
| Mitochondrial isoleucine tRNA synthetase                                  | 113719                | IPI00017283.2 | 11.66                       | 7                     |
| Mitochondrial precursor proteins import receptor                          | 67412                 | IPI00015602.1 | 37.007                      | 16                    |
| Mitochondrial processing peptidase alpha subunit, mitochondrial precursor | 58216                 | IPI00166749.3 | 19.619                      | 5                     |
| Mitochondrial processing peptidase beta subunit, mitochondrial precursor  | 54331                 | IPI00289535.3 | 21.268                      | 6                     |
| Mitochondrial Rho 2                                                       | 67984                 | IPI00465059.3 | 3.398                       | 2                     |
| Mitochondrial ribosomal protein bMRP63                                    | 12259                 | IPI00031485.1 | 13.725                      | 2                     |
| Mitochondrial ribosomal protein L14                                       | 15937                 | IPI00418290.1 | 28.276                      | 3                     |
| Mitochondrial ribosomal protein L16                                       | 28445                 | IPI00000821.1 | 10.757                      | 2                     |
| Mitochondrial ribosomal protein L39 isoform b                             | 40442                 | IPI00084571.4 | 21.53                       | 5                     |
| Mitochondrial ribosomal protein L4                                        | 34897                 | IPI00023334.1 | 32.154                      | 5                     |
| Mitochondrial ribosomal protein L41                                       | 15373                 | IPI00217553.1 | 27.007                      | 3                     |
| Mitochondrial ribosomal protein L53                                       | 12099                 | IPI00061531.3 | 56.25                       | 3                     |
| Mitochondrial ribosomal protein S23                                       | 21757                 | IPI00032881.2 | 37.368                      | 3                     |
| Mitochondrial ribosome recycling factor, isoform 1                        | 29259                 | IPI00061108.3 | 34.351                      | 4                     |
| Mitogen-activated protein kinase 1                                        | 41363                 | IPI00003479.1 | 22.222                      | 7                     |
| Mitogen-activated protein kinase 13                                       | 42063                 | IPI00005741.1 | 7.123                       | 2                     |
| Mitogen-activated protein kinase 14 isoform 2                             | 41267                 | IPI00002857.1 | 12.222                      | 2                     |
| Mitogen-activated protein kinase 3                                        | 43108                 | IPI00018195.1 | 20.58                       | 4                     |
| Mitogen-activated protein kinase kinase 1 interacting protein 1           | 13614                 | IPI00030919.3 | 45.161                      | 5                     |
| Mitogen-activated protein kinase kinase kinase 7 interacting protein 1    | 54610                 | IPI00019459.1 | 13.889                      | 3                     |
| Mitotic checkpoint protein BUB3                                           | 37131                 | IPI00013468.1 | 25.915                      | 4                     |
| MLD                                                                       | 37841                 | IPI00021147.1 | 10.526                      | 2                     |
| Moesin                                                                    | 67647                 | IPI00219365.2 | 69.097                      | 43                    |
| Molecule interacting with Rab13                                           | 93383                 | IPI00174962.2 | 4.519                       | 2                     |
| Mothers against decapentaplegic homolog 4                                 | 60401                 | IPI00013404.1 | 11.413                      | 4                     |
| M-phase phosphoprotein 6                                                  | 18984                 | IPI00016074.1 | 19.375                      | 2                     |
| Mpv17 protein                                                             | 19720                 | IPI00023958.1 | 13.636                      | 2                     |
| MRNA (Guanine-7-)methyltransferase                                        | 57688                 | IPI00410657.1 | 10.913                      | 3                     |
| mRNA-associated protein mrnp 41                                           | 40942                 | IPI00019733.1 | 12.228                      | 4                     |
| MRPL1 protein                                                             | 34453                 | IPI00465216.3 | 24.752                      | 4                     |
| MRPL17 protein                                                            | 20008                 | IPI00172591.2 | 26.857                      | 3                     |
| MRPL2 protein                                                             | 33280                 | IPI00411816.3 | 10.82                       | 3                     |
| MRPL48 protein                                                            | 29292                 | IPI00295066.3 | 19.157                      | 4                     |
| MRPS9 protein                                                             | 45806                 | IPI00014835.4 | 9.596                       | 2                     |
| MSTP017                                                                   | 48090                 | IPI00022305.3 | 6.683                       | 2                     |
| MTCH1 protein                                                             | 40155                 | IPI00383450.1 | 19.559                      | 3                     |
| Mucin 13 precursor                                                        | 54569                 | IPI00011448.1 | 15.039                      | 7                     |

| Protein Description                                                                               | Molecular Weight (Da) | IPI Number    | Total Sequence Coverage (%) | Total Unique Peptides |
|---------------------------------------------------------------------------------------------------|-----------------------|---------------|-----------------------------|-----------------------|
| Multidrug resistance protein 1                                                                    | 141373                | IPI00027481.1 | 3.906                       | 4                     |
| Multifunctional protein ADE2                                                                      | 49648                 | IPI00217223.1 | 13.747                      | 7                     |
| Multiple ankyrin repeats single KH domain protein isoform 2                                       | 277004                | IPI00217442.1 | 1.567                       | 2                     |
| Multiple asters 1                                                                                 | 169346                | IPI00396279.2 | 3.576                       | 4                     |
| Multiple copies in a T-cell malignancies                                                          | 20542                 | IPI00179026.2 | 30.387                      | 4                     |
| Multiple domain putative nuclear protein                                                          | 59807                 | IPI00002986.3 | 7.29                        | 2                     |
| Multiple inositol polyphosphate phosphatase-like protein                                          | 34639                 | IPI00028553.1 | 8.013                       | 2                     |
| Multisynthetase complex auxiliary component p18                                                   | 19798                 | IPI00003588.1 | 20.115                      | 2                     |
| Multisynthetase complex auxiliary component p38                                                   | 35326                 | IPI00011916.1 | 13.75                       | 3                     |
| Multisynthetase complex auxiliary component p43                                                   | 34305                 | IPI00006252.1 | 36.538                      | 11                    |
| Muted protein homolog                                                                             | 21596                 | IPI00154778.1 | 16.043                      | 3                     |
| My005 protein                                                                                     | 25609                 | IPI00383163.2 | 16.444                      | 3                     |
| My019 protein                                                                                     | 19676                 | IPI00301432.1 | 33.143                      | 3                     |
| Myeloid/lymphoid or mixed-lineage leukemia (Trithorax homolog, Drosophila);<br>translocated to, 4 | 206676                | IPI00023461.2 | 9.101                       | 10                    |
| MYG1 protein                                                                                      | 42418                 | IPI00029444.1 | 13.83                       | 3                     |
| MYH7B protein                                                                                     | 215094                | IPI00020294.2 | 1.959                       | 2                     |
| Myo-inositol 1-phosphate synthase A1                                                              | 61029                 | IPI00301189.2 | 15.412                      | 6                     |
| Myo-inositol monophosphatase A3                                                                   | 38700                 | IPI00015834.2 | 15.877                      | 4                     |
| Myosin binding subunit 85                                                                         | 84830                 | IPI00014340.1 | 5.627                       | 3                     |
| Myosin heavy chain                                                                                | 227863                | IPI00337335.3 | 41.955                      | 75                    |
| Myosin heavy chain, nonmuscle type A                                                              | 226392                | IPI00019502.1 | 26.48                       | 76                    |
| Myosin heavy chain, nonmuscle type B                                                              | 228798                | IPI00397526.1 | 45.496                      | 92                    |
| Myosin heavy chain, smooth muscle isoform                                                         | 227199                | IPI00020501.1 | 5.933                       | 9                     |
| Myosin Ic                                                                                         | 121606                | IPI00010418.3 | 20.884                      | 16                    |
| Myosin Ie                                                                                         | 126961                | IPI00329672.4 | 6.583                       | 5                     |
| Myosin light chain 1, slow-twitch muscle A isoform                                                | 22750                 | IPI00027255.1 | 23.558                      | 4                     |
| Myosin regulatory light chain 2, nonsarcomeric                                                    | 19650                 | IPI00220573.3 | 56.471                      | 9                     |
| Myosin Vc                                                                                         | 202666                | IPI00016007.1 | 2.067                       | 3                     |
| Myotonic dystrophy kinase-related CDC42-binding kinase gamma                                      | 172411                | IPI00454910.1 | 1.676                       | 2                     |
| Myotrophin                                                                                        | 12756                 | IPI00179589.2 | 60.684                      | 5                     |
| Myristoylated alanine-rich C-kinase substrate                                                     | 31395                 | IPI00219301.5 | 33.233                      | 10                    |
| N                                                                                                 | 37170                 | IPI00026259.1 | 23.121                      | 5                     |
| N8 protein long isoform                                                                           | 26367                 | IPI00218323.1 | 54.032                      | 17                    |
| N-acetylgalactosamine kinase                                                                      | 50346                 | IPI00414287.1 | 9.825                       | 5                     |
| N-acetylgalactosamine-6-sulfatase precursor                                                       | 57989                 | IPI00029605.1 | 8.238                       | 4                     |
| N-acetylglucosamine kinase                                                                        | 37352                 | IPI00296526.3 | 22.965                      | 7                     |

| Protein Description                                                      | Molecular Weight (Da) | IPI Number    | Total Sequence Coverage (%) | Total Unique Peptides |
|--------------------------------------------------------------------------|-----------------------|---------------|-----------------------------|-----------------------|
| N-acetylglucosamine-6-sulfatase precursor                                | 62042                 | IPI00012102.1 | 27.717                      | 11                    |
| NAD                                                                      | 113823                | IPI00337541.3 | 24.678                      | 19                    |
| NAD                                                                      | 30848                 | IPI00012069.1 | 21.898                      | 4                     |
| NAD(P)H dehydrogenase, quinone 2                                         | 25902                 | IPI00219129.7 | 16.883                      | 2                     |
| NAD-dependent deacetylase sirtuin 3, mitochondrial precursor             | 43546                 | IPI00183171.4 | 8.271                       | 2                     |
| NAD-dependent malic enzyme, mitochondrial precursor                      | 65402                 | IPI00011201.1 | 14.212                      | 5                     |
| NADH dehydrogenase (ubiquinone) 1 alpha subcomplex, 6, 14kDa             | 17859                 | IPI00419266.1 | 25.974                      | 4                     |
| NADH-cytochrome b5 reductase                                             | 34082                 | IPI00328415.8 | 68.667                      | 12                    |
| NADH-ubiquinone oxidoreductase 13 kDa-A subunit, mitochondrial precursor | 13703                 | IPI00025344.1 | 57.258                      | 5                     |
| NADH-ubiquinone oxidoreductase 15 kDa subunit                            | 12378                 | IPI00220063.4 | 14.286                      | 2                     |
| NADH-ubiquinone oxidoreductase 18 kDa subunit, mitochondrial precursor   | 20095                 | IPI00011217.3 | 38.857                      | 4                     |
| NADH-ubiquinone oxidoreductase 19 kDa subunit                            | 19961                 | IPI00219034.2 | 56.14                       | 6                     |
| NADH-ubiquinone oxidoreductase 23 kDa subunit, mitochondrial precursor   | 23690                 | IPI00010845.3 | 36.19                       | 6                     |
| NADH-ubiquinone oxidoreductase 24 kDa subunit, mitochondrial precursor   | 27374                 | IPI00291328.3 | 36.145                      | 7                     |
| NADH-ubiquinone oxidoreductase 30 kDa subunit, mitochondrial precursor   | 30223                 | IPI00025796.3 | 63.636                      | 13                    |
| NADH-ubiquinone oxidoreductase 39 kDa subunit, mitochondrial precursor   | 42483                 | IPI00003968.1 | 40.318                      | 12                    |
| NADH-ubiquinone oxidoreductase 42 kDa subunit, mitochondrial precursor   | 40725                 | IPI00029561.1 | 28.169                      | 7                     |
| NADH-ubiquinone oxidoreductase 49 kDa subunit, mitochondrial precursor   | 52512                 | IPI00025239.2 | 24.19                       | 7                     |
| NADH-ubiquinone oxidoreductase 75 kDa subunit, mitochondrial precursor   | 79465                 | IPI00178677.3 | 39.477                      | 21                    |
| NADH-ubiquinone oxidoreductase AGGG subunit, mitochondrial precursor     | 12051                 | IPI00028904.1 | 19.048                      | 2                     |
| NADH-ubiquinone oxidoreductase ASH1 subunit, mitochondrial precursor     | 21751                 | IPI00028883.1 | 38.71                       | 5                     |
| NADH-ubiquinone oxidoreductase B17 subunit                               | 15348                 | IPI00219385.2 | 15.748                      | 2                     |
| NADH-ubiquinone oxidoreductase B18 subunit                               | 16260                 | IPI00219772.2 | 27.206                      | 3                     |
| NADH-ubiquinone oxidoreductase B22 subunit                               | 21686                 | IPI00255052.4 | 30.337                      | 3                     |
| NADH-ubiquinone oxidoreductase B8 subunit                                | 10784                 | IPI00219381.4 | 51.02                       | 5                     |
| NADH-ubiquinone oxidoreductase flavoprotein 3, isoform a                 | 50952                 | IPI00291016.4 | 37.844                      | 14                    |
| NADH-ubiquinone oxidoreductase MLRQ subunit                              | 9364                  | IPI00011770.1 | 22.222                      | 2                     |
| NADH-ubiquinone oxidoreductase PDSW subunit                              | 20632                 | IPI00479905.4 | 46.784                      | 7                     |
| NADH-ubiquinone oxidoreductase SGDH subunit, mitochondrial precursor     | 21737                 | IPI00013459.1 | 14.286                      | 2                     |
| NADH-ubiquinone oxidoreductase subunit B14.5b                            | 14178                 | IPI00029558.1 | 21.008                      | 2                     |
| NADH-ubiquinone oxidoreductase subunit B17.2                             | 17104                 | IPI00005966.3 | 55.172                      | 6                     |
| NADP-dependent leukotriene B4 12-hydroxydehydrogenase                    | 35847                 | IPI00292657.3 | 20.061                      | 6                     |
| NADP-dependent malic enzyme                                              | 64109                 | IPI00008215.1 | 14.685                      | 4                     |
| NADP-dependent malic enzyme, mitochondrial precursor                     | 67012                 | IPI00003970.1 | 10.099                      | 2                     |
| NADPH--cytochrome P450 reductase                                         | 76510                 | IPI00470467.4 | 26.923                      | 13                    |
| Nascent polypeptide associated complex alpha subunit                     | 23370                 | IPI00023748.3 | 34.884                      | 7                     |
| Nck-associated protein 1                                                 | 128707                | IPI00031982.1 | 3.28                        | 3                     |

| Protein Description                                                  | Molecular Weight (Da) | IPI Number    | Total Sequence Coverage (%) | Total Unique Peptides |
|----------------------------------------------------------------------|-----------------------|---------------|-----------------------------|-----------------------|
| NCL protein                                                          | 50920                 | IPI00183526.4 | 42.324                      | 23                    |
| NDRG1 protein                                                        | 42808                 | IPI00022078.3 | 29.442                      | 7                     |
| NDUFA7 protein                                                       | 13271                 | IPI00452731.3 | 46.61                       | 6                     |
| Nectin-like protein 2                                                | 48506                 | IPI00003813.2 | 11.312                      | 2                     |
| Neddylin                                                             | 9066                  | IPI00020008.1 | 79.012                      | 7                     |
| Negative elongation factor B                                         | 65655                 | IPI00103483.1 | 10.172                      | 3                     |
| Neighbor of COX4                                                     | 23758                 | IPI00005740.1 | 22.381                      | 3                     |
| Nestin                                                               | 177332                | IPI00513769.1 | 9.315                       | 9                     |
| N-ethylmaleimide-sensitive factor                                    | 82542                 | IPI00006451.4 | 42.876                      | 27                    |
| Neurabin II protein                                                  | 89397                 | IPI00045550.1 | 4.162                       | 2                     |
| Neural cell adhesion molecule 1, 140 kDa isoform precursor           | 93303                 | IPI00435020.3 | 8.255                       | 4                     |
| Neural proliferation differentiation and control protein-1 precursor | 34494                 | IPI00299699.1 | 8.923                       | 3                     |
| Neural Wiskott-Aldrich syndrome protein                              | 54793                 | IPI00011676.2 | 10.891                      | 4                     |
| Neuroblast differentiation associated protein AHNAK                  | 312294                | IPI00021812.1 | 20.27                       | 31                    |
| Neuroblastoma-amplified protein                                      | 268298                | IPI00333913.6 | 1.181                       | 2                     |
| Neuroendocrine convertase 1 precursor                                | 84069                 | IPI00301961.3 | 39.841                      | 23                    |
| Neuroendocrine convertase 2 precursor                                | 70521                 | IPI00029131.1 | 45.298                      | 18                    |
| Neuroendocrine-specific Golgi protein p55                            | 28327                 | IPI00009881.2 | 7.6                         | 2                     |
| Neurofilament triplet M protein                                      | 102255                | IPI00217507.4 | 6.776                       | 4                     |
| Neurolysin, mitochondrial precursor                                  | 80600                 | IPI00010346.1 | 4.403                       | 2                     |
| Neuron navigator 1                                                   | 202347                | IPI00171636.2 | 1.385                       | 2                     |
| Neuronal pentraxin-2 precursor                                       | 47012                 | IPI00026946.2 | 20.65                       | 7                     |
| Neuronal protein NP25                                                | 24877                 | IPI00005981.2 | 17.195                      | 3                     |
| Neuropathy target esterase                                           | 146123                | IPI00217600.2 | 2.939                       | 3                     |
| NF45 protein                                                         | 44669                 | IPI00005198.1 | 38.424                      | 12                    |
| NG,NG-dimethylarginine dimethylaminohydrolase 1                      | 30971                 | IPI00220342.4 | 54.577                      | 14                    |
| NG,NG-dimethylarginine dimethylaminohydrolase 2                      | 29625                 | IPI00000760.1 | 54.386                      | 8                     |
| NHP2-like protein 1                                                  | 14165                 | IPI00026167.1 | 56.25                       | 5                     |
| Niban protein                                                        | 103070                | IPI00328350.6 | 5.065                       | 3                     |
| Nicalin                                                              | 62935                 | IPI00470649.1 | 19.005                      | 7                     |
| Nicotinamide mononucleotide adenylyltransferase 1                    | 31913                 | IPI00009726.4 | 12.545                      | 2                     |
| Nicotinamide N-methyltransferase                                     | 29555                 | IPI00027681.1 | 10.985                      | 2                     |
| Nicotinate phosphoribosyltransferase-like protein                    | 60239                 | IPI00465085.1 | 16.578                      | 4                     |
| Nicotinate-nucleotide pyrophosphorylase                              | 30796                 | IPI00300086.3 | 6.734                       | 2                     |
| NipSnap1 protein                                                     | 33289                 | IPI00304435.3 | 36.62                       | 12                    |
| NipSnap2 protein                                                     | 33721                 | IPI00016077.1 | 37.762                      | 8                     |
| NipSnap3A protein                                                    | 28449                 | IPI00004845.4 | 46.964                      | 8                     |



| Protein Description                                          | Molecular Weight (Da) | IPI Number    | Total Sequence Coverage (%) | Total Unique Peptides |
|--------------------------------------------------------------|-----------------------|---------------|-----------------------------|-----------------------|
| Nischarin                                                    | 166548                | IPI00032187.2 | 2.327                       | 3                     |
| Nit protein 2                                                | 30589                 | IPI00299639.4 | 35.145                      | 8                     |
| Nodal modulator 2 isoform 2                                  | 134107                | IPI00333985.2 | 24.795                      | 19                    |
| NOL1/NOP2/Sun domain family 2 protein                        | 86416                 | IPI00306369.3 | 5.997                       | 3                     |
| Nonhistone chromosomal protein HMG-14                        | 10522                 | IPI00554761.1 | 16.162                      | 3                     |
| Nonhistone chromosomal protein HMG-17-like 3                 | 9402                  | IPI00220484.2 | 75.281                      | 10                    |
| NONO protein                                                 | 54197                 | IPI00304596.1 | 63.057                      | 28                    |
| Nonspecific lipid-transfer protein, mitochondrial precursor  | 58956                 | IPI00026105.1 | 13.894                      | 12                    |
| Normal mucosa of esophagus specific gene 1 protein           | 9611                  | IPI00031772.1 | 43.373                      | 2                     |
| Novel protein                                                | 132739                | IPI00217357.2 | 13.478                      | 10                    |
| Novel protein                                                | 205022                | IPI00554520.1 | 7.246                       | 9                     |
| Novel protein                                                | 46447                 | IPI00065500.3 | 19.221                      | 4                     |
| Novel protein                                                | 65483                 | IPI00217617.4 | 10.417                      | 4                     |
| Novel protein                                                | 25213                 | IPI00514834.1 | 21.397                      | 3                     |
| Novel protein                                                | 43061                 | IPI00303944.4 | 7.812                       | 2                     |
| Novel protein                                                | 72635                 | IPI00217007.2 | 6.597                       | 2                     |
| Novel protein                                                | 26239                 | IPI00061403.4 | 3.814                       | 2                     |
| Novel protein                                                | 167984                | IPI00409607.2 | 3.291                       | 2                     |
| Novel protein                                                | 95515                 | IPI00549766.2 | 3.226                       | 2                     |
| Novel protein similar to RNA binding motif protein, X-linked | 42116                 | IPI00061178.1 | 31.795                      | 11                    |
| Novel transcript                                             | 38131                 | IPI00145260.3 | 19.663                      | 3                     |
| N-PAC protein                                                | 60510                 | IPI00000155.3 | 5.244                       | 2                     |
| NPD011                                                       | 24339                 | IPI00550746.3 | 23.697                      | 3                     |
| N-sulphoglucosamine sulphohydrolase precursor                | 56659                 | IPI00019988.1 | 13.546                      | 5                     |
| N-terminal acetyltransferase complex ARD1 subunit homolog    | 26442                 | IPI00013184.1 | 23.83                       | 4                     |
| Nuclear antigen H731                                         | 50559                 | IPI00240675.1 | 24.017                      | 7                     |
| Nuclear envelope pore membrane protein POM 121               | 125011                | IPI00032358.3 | 6.265                       | 3                     |
| Nuclear factor kappa-B, subunit 1                            | 105361                | IPI00292537.2 | 13.725                      | 8                     |
| Nuclear pore complex protein Nup133                          | 128932                | IPI00291200.1 | 6.661                       | 4                     |
| Nuclear pore complex protein Nup155                          | 155100                | IPI00026625.1 | 5.607                       | 4                     |
| Nuclear pore complex protein Nup205                          | 228003                | IPI00472675.2 | 4.568                       | 5                     |
| Nuclear pore complex protein Nup88                           | 83489                 | IPI00001738.4 | 6.478                       | 4                     |
| Nuclear pore complex protein Nup93                           | 93499                 | IPI00397904.3 | 15.14                       | 6                     |
| Nuclear pore glycoprotein p62                                | 53236                 | IPI00293533.3 | 6.705                       | 3                     |
| Nuclear protein 5qNCA                                        | 191491                | IPI00298935.4 | 3.35                        | 3                     |
| Nuclear protein Hcc-1                                        | 23525                 | IPI00014938.2 | 33.971                      | 6                     |
| Nuclear protein SkiP                                         | 61456                 | IPI00013830.1 | 18.097                      | 7                     |

| Protein Description                                              | Molecular Weight (Da) | IPI Number    | Total Sequence Coverage (%) | Total Unique Peptides |
|------------------------------------------------------------------|-----------------------|---------------|-----------------------------|-----------------------|
| Nuclear protein, NP220                                           | 220492                | IPI00470596.2 | 5.561                       | 8                     |
| Nuclear receptor coactivator 5                                   | 65496                 | IPI00288941.1 | 13.644                      | 4                     |
| Nuclear receptor co-repressor 2                                  | 274564                | IPI00001735.2 | 2.971                       | 4                     |
| Nuclear ubiquitous casein and cyclin-dependent kinases substrate | 27280                 | IPI00022145.5 | 38.683                      | 8                     |
| Nuclease sensitive element binding protein 1                     | 35903                 | IPI00031812.1 | 54.63                       | 16                    |
| Nucleobindin 1 precursor                                         | 53818                 | IPI00295542.4 | 49.892                      | 23                    |
| Nucleobindin 2 precursor                                         | 50191                 | IPI00009123.1 | 59.048                      | 21                    |
| Nucleolar GTP-binding protein 1                                  | 73787                 | IPI00385042.3 | 3.949                       | 2                     |
| Nucleolar protein family A member 1                              | 22334                 | IPI00302176.5 | 12.442                      | 2                     |
| Nucleolar protein NOP5                                           | 59541                 | IPI00006379.1 | 25.898                      | 11                    |
| Nucleolar protein Nop56                                          | 66195                 | IPI00411937.2 | 28.523                      | 15                    |
| Nucleolar RNA helicase II                                        | 87302                 | IPI00015953.2 | 19.285                      | 13                    |
| Nucleoporin 160kDa                                               | 162017                | IPI00221235.3 | 2.298                       | 2                     |
| Nucleoporin 50 kDa                                               | 50113                 | IPI00026940.2 | 6.624                       | 2                     |
| Nucleoporin Nup35                                                | 34751                 | IPI00329650.1 | 15.951                      | 3                     |
| Nucleoporin-like protein RIP                                     | 58224                 | IPI00304693.5 | 8.541                       | 3                     |
| Nucleoside diphosphate kinase 3                                  | 19003                 | IPI00012315.2 | 29.586                      | 4                     |
| Nucleoside diphosphate kinase A                                  | 17138                 | IPI00012048.1 | 26.974                      | 4                     |
| Nucleoside diphosphate kinase B                                  | 17287                 | IPI00026260.1 | 71.711                      | 11                    |
| Nucleosomal binding protein 1                                    | 31506                 | IPI00006157.1 | 15.957                      | 3                     |
| Nucleosome assembly protein 1-like 1                             | 45346                 | IPI00023860.1 | 41.688                      | 10                    |
| Nucleosome assembly protein 1-like 4                             | 42797                 | IPI00017763.3 | 46.667                      | 14                    |
| NudC domain containing 2                                         | 17665                 | IPI00103142.1 | 19.745                      | 2                     |
| NUMA1 protein                                                    | 109212                | IPI00030136.1 | 31.971                      | 25                    |
| NUP210 protein                                                   | 205184                | IPI00291755.4 | 3.388                       | 4                     |
| Optic atrophy 1 isoform 4                                        | 111752                | IPI00107749.1 | 34.651                      | 25                    |
| Optic atrophy 3 protein                                          | 19984                 | IPI00018600.1 | 6.145                       | 2                     |
| Ornithine aminotransferase, mitochondrial precursor              | 48504                 | IPI00022334.1 | 58.77                       | 18                    |
| Ost-II                                                           | 120542                | IPI00004536.4 | 3.468                       | 2                     |
| OTTHUMP00000016771                                               | 206560                | IPI00291916.4 | 2.087                       | 2                     |
| OTTHUMP00000016847                                               | 47746                 | IPI00217852.6 | 12.385                      | 3                     |
| OTTHUMP00000017054                                               | 51812                 | IPI00177965.3 | 11.648                      | 3                     |
| OTTHUMP00000017171                                               | 33677                 | IPI00302688.6 | 14.007                      | 2                     |
| OTTHUMP00000017295                                               | 23070                 | IPI00514897.1 | 12.56                       | 2                     |
| OTTHUMP00000017331                                               | 54032                 | IPI00012440.4 | 8.351                       | 3                     |
| OTTHUMP00000017427                                               | 181580                | IPI00217683.2 | 5.404                       | 6                     |
| OTTHUMP00000018498                                               | 108934                | IPI00413548.3 | 9.395                       | 4                     |

| Protein Description                    | Molecular Weight (Da) | IPI Number    | Total Sequence Coverage (%) | Total Unique Peptides |
|----------------------------------------|-----------------------|---------------|-----------------------------|-----------------------|
| OTTHUMP00000018508                     | 14202                 | IPI00375957.2 | 8.8                         | 2                     |
| OTTHUMP00000018702                     | 41335                 | IPI00018942.2 | 30.256                      | 12                    |
| OTTHUMP00000022188                     | 84085                 | IPI00456750.1 | 30.027                      | 13                    |
| OTTHUMP00000022216                     | 41297                 | IPI00401759.2 | 15.526                      | 3                     |
| OTTHUMP00000022589                     | 228728                | IPI00219314.5 | 17.104                      | 21                    |
| OTTHUMP00000022614                     | 79500                 | IPI00385729.4 | 14.54                       | 7                     |
| OTTHUMP00000028732                     | 21811                 | IPI00017799.3 | 11.675                      | 3                     |
| OTTHUMP00000028936                     | 49735                 | IPI00220007.6 | 18.847                      | 6                     |
| OTTHUMP00000030210                     | 55764                 | IPI00099311.3 | 6.036                       | 2                     |
| OTTHUMP00000030692                     | 16242                 | IPI00412497.2 | 37.838                      | 4                     |
| OTTHUMP00000030884                     | 42823                 | IPI00005605.3 | 8.763                       | 2                     |
| OTTHUMP00000031778                     | 56197                 | IPI00021794.6 | 8.835                       | 4                     |
| OTTHUMP00000039331                     | 12836                 | IPI00026570.2 | 21.739                      | 5                     |
| OTTHUMP00000039883                     | 107273                | IPI00394788.2 | 9.746                       | 6                     |
| OTTHUMP00000040723                     | 139677                | IPI00020416.6 | 7.369                       | 6                     |
| OTTHUMP00000040881                     | 57244                 | IPI00022255.1 | 18.235                      | 5                     |
| OTTHUMP00000045024                     | 32613                 | IPI00256376.3 | 25.083                      | 5                     |
| OTTHUMP00000058856                     | 74751                 | IPI00166584.2 | 33.183                      | 11                    |
| OTTHUMP00000059154                     | 28658                 | IPI00334579.2 | 17.625                      | 4                     |
| OTTHUMP00000059425                     | 39146                 | IPI00007940.2 | 29.885                      | 9                     |
| OTTHUMP00000060643                     | 66279                 | IPI00236381.4 | 22.089                      | 9                     |
| OTTHUMP00000060743                     | 74034                 | IPI00465048.2 | 4.992                       | 2                     |
| OTTHUMP00000061860                     | 481589                | IPI00456919.2 | 12.14                       | 24                    |
| OTTHUMP00000062781                     | 101304                | IPI00470587.2 | 5.805                       | 4                     |
| OTTHUMP00000064563                     | 213488                | IPI00465191.2 | 7.081                       | 8                     |
| OTTHUMP00000065098                     | 40436                 | IPI00306159.2 | 18.231                      | 4                     |
| Ovarian/Breast septin epsilon          | 65361                 | IPI00455033.2 | 46.758                      | 21                    |
| Oxidase (cytOchrOme c) assembly 1-like | 55262                 | IPI00014301.1 | 9.495                       | 3                     |
| Oxidative-stress responsive 1          | 57986                 | IPI00010080.2 | 10.626                      | 4                     |
| Oxoglutarate dehydrogenase-like        | 114424                | IPI00412522.3 | 16.535                      | 11                    |
| Oxysterol-binding protein              | 83733                 | IPI00077853.3 | 2.969                       | 2                     |
| Oxysterol-binding protein 1            | 89365                 | IPI00024971.1 | 17.844                      | 10                    |
| P120                                   | 112221                | IPI00025890.2 | 5.761                       | 3                     |
| P450-like protein                      | 52399                 | IPI00419579.3 | 6.494                       | 2                     |
| P58                                    | 57544                 | IPI00006713.1 | 46.825                      | 16                    |
| P60                                    | 47572                 | IPI00179473.6 | 21.136                      | 6                     |
| P62                                    | 48197                 | IPI00008575.3 | 29.12                       | 10                    |

| Protein Description                                                    | Molecular Weight (Da) | IPI Number    | Total Sequence Coverage (%) | Total Unique Peptides |
|------------------------------------------------------------------------|-----------------------|---------------|-----------------------------|-----------------------|
| P63 protein                                                            | 65983                 | IPI00141318.1 | 70.93                       | 48                    |
| Paired amphipathic helix protein Sin3a                                 | 145085                | IPI00170596.1 | 4.242                       | 3                     |
| Palmitoyl-protein thioesterase 1 precursor                             | 34171                 | IPI00002412.1 | 32.353                      | 6                     |
| Pancreatic hormone precursor                                           | 10438                 | IPI00000982.1 | 57.895                      | 8                     |
| Pancreatic lipase related protein 2 precursor                          | 51913                 | IPI00005924.1 | 9.382                       | 2                     |
| Pancreatic triacylglycerol lipase precursor                            | 51124                 | IPI00027720.1 | 20.645                      | 5                     |
| Pancreatitis-associated protein 1 precursor                            | 19382                 | IPI00029039.1 | 21.143                      | 3                     |
| Pantothenate kinase 4                                                  | 85937                 | IPI00018946.3 | 8.538                       | 4                     |
| Parafibromin                                                           | 60539                 | IPI00300659.4 | 5.273                       | 2                     |
| Paraspeckle protein 1 alpha isoform                                    | 58706                 | IPI00103525.1 | 24.857                      | 11                    |
| Parathyrosin                                                           | 11523                 | IPI00410376.1 | 26.471                      | 4                     |
| PBK1 protein                                                           | 58097                 | IPI00008708.4 | 14.313                      | 6                     |
| PCBD protein                                                           | 12002                 | IPI00218568.4 | 61.538                      | 5                     |
| PDCD6IP protein                                                        | 96757                 | IPI00246058.3 | 38.488                      | 28                    |
| PDZ and LIM domain protein 1                                           | 35918                 | IPI00010414.3 | 52.134                      | 10                    |
| PDZ domain containing-protein                                          | 57093                 | IPI00298067.3 | 5.78                        | 3                     |
| Peflin                                                                 | 30361                 | IPI00018235.3 | 22.887                      | 5                     |
| Pelota homolog                                                         | 43350                 | IPI00106698.1 | 14.805                      | 4                     |
| PELP1                                                                  | 136556                | IPI00006702.2 | 2.103                       | 2                     |
| PePtidylglycine aLpha-amidating monooxygenase isoform a, PreProProtein | 108334                | IPI00177543.4 | 14.168                      | 11                    |
| Peptidyl-prolyl cis-trans isomerase                                    | 23714                 | IPI00419262.1 | 67.13                       | 20                    |
| Peptidyl-prolyl cis-trans isomerase A                                  | 17870                 | IPI00419585.6 | 6.707                       | 2                     |
| Peptidyl-prolyl cis-trans isomerase NIMA-interacting 1                 | 18232                 | IPI00013723.3 | 46.626                      | 6                     |
| Peptidyl-prolyl cis-trans isomerase, mitochondrial precursor           | 22026                 | IPI00026519.1 | 30.918                      | 4                     |
| PePtidylProlyl isomerase A-like                                        | 17987                 | IPI00549466.1 | 83.636                      | 14                    |
| Pericentriol material 1                                                | 228566                | IPI00006213.1 | 1.828                       | 3                     |
| Peripheral plasma membrane protein CASK                                | 104998                | IPI00024726.2 | 7.667                       | 4                     |
| Peripherin                                                             | 53846                 | IPI00013164.3 | 7.643                       | 5                     |
| Periplakin                                                             | 204526                | IPI00298057.1 | 30.011                      | 38                    |
| Peroxiredoxin 1                                                        | 22096                 | IPI00000874.1 | 55.779                      | 16                    |
| Peroxiredoxin 2                                                        | 21878                 | IPI00027350.1 | 60.606                      | 15                    |
| Peroxiredoxin 4                                                        | 30521                 | IPI00011937.1 | 41.697                      | 11                    |
| Peroxiredoxin 5, mitochondrial precursor                               | 22012                 | IPI00024915.2 | 63.551                      | 21                    |
| Peroxiredoxin 6                                                        | 24888                 | IPI00220301.4 | 73.094                      | 16                    |
| Peroxisomal 3,2-trans-enoyl-CoA isomerase                              | 39584                 | IPI00419263.3 | 23.12                       | 7                     |
| Peroxisomal bifunctional enzyme                                        | 79159                 | IPI00216164.2 | 7.341                       | 4                     |
| Peroxisomal membrane protein PEX14                                     | 41212                 | IPI00025346.3 | 16.711                      | 4                     |

| Protein Description                                                | Molecular Weight (Da) | IPI Number    | Total Sequence Coverage (%) | Total Unique Peptides |
|--------------------------------------------------------------------|-----------------------|---------------|-----------------------------|-----------------------|
| Peroxisomal multifunctional enzyme type 2                          | 79636                 | IPI00019912.1 | 37.364                      | 22                    |
| Peroxisome assembly factor                                         | 28413                 | IPI00021978.1 | 11.583                      | 3                     |
| Peroxisome biogenesis factor 1                                     | 142778                | IPI00411291.1 | 1.871                       | 2                     |
| PEST-containing nuclear protein                                    | 18944                 | IPI00291608.3 | 36.517                      | 6                     |
| PHD finger protein 14                                              | 100019                | IPI00454969.3 | 3.153                       | 2                     |
| PHD finger protein 2                                               | 121157                | IPI00260388.3 | 1.998                       | 2                     |
| PHD finger protein 3                                               | 229339                | IPI00170770.2 | 2.354                       | 3                     |
| Phenol-sulfating phenol sulfotransferase 1                         | 34175                 | IPI00300026.5 | 12.881                      | 2                     |
| Phenylalanyl-tRNA synthetase alpha chain                           | 57396                 | IPI00031820.2 | 38.067                      | 11                    |
| Phenylalanyl-tRNA synthetase beta chain                            | 66088                 | IPI00300074.3 | 28.693                      | 13                    |
| Phosphatidate cytidyltransferase 2                                 | 51384                 | IPI00032150.3 | 14.831                      | 5                     |
| Phosphatidylethanolamine-binding protein                           | 20913                 | IPI00219446.4 | 89.247                      | 16                    |
| Phosphatidylinositol 4-kinase type II                              | 53989                 | IPI00020124.1 | 9.603                       | 2                     |
| Phosphatidylinositol transfer protein alpha isoform                | 31914                 | IPI00216048.7 | 13.284                      | 2                     |
| Phosphatidylinositol-4-phosphate 5-kinase, type II, gamma          | 47298                 | IPI00152303.5 | 21.378                      | 6                     |
| Phosphatidylserine synthase I                                      | 55491                 | IPI00010746.1 | 4.44                        | 2                     |
| Phosphoacetylglucosamine mutase                                    | 59814                 | IPI00030116.1 | 24.17                       | 9                     |
| Phosphodiesterase 4D interacting protein                           | 128546                | IPI00337544.6 | 4.59                        | 3                     |
| Phosphoenolpyruvate carboxykinase, mitochondrial precursor         | 70592                 | IPI00294380.3 | 40.938                      | 23                    |
| Phosphoglucomutase 1                                               | 61331                 | IPI00219526.5 | 10.676                      | 3                     |
| Phosphoglucomutase 2                                               | 68298                 | IPI00549837.2 | 26.471                      | 10                    |
| Phosphoglucomutase 2-like 1                                        | 70394                 | IPI00173346.2 | 4.341                       | 3                     |
| Phosphoglycerate kinase 1                                          | 44455                 | IPI00169383.2 | 83.173                      | 45                    |
| Phosphoglycerate kinase, testis specific                           | 44636                 | IPI00219568.3 | 2.885                       | 2                     |
| Phosphoglycerate mutase 1                                          | 28655                 | IPI00385244.4 | 74.308                      | 18                    |
| Phosphoinositide 3-kinase                                          | 190617                | IPI00002580.1 | 2.55                        | 2                     |
| Phospholipase A-2-activating protein                               | 80775                 | IPI00218465.9 | 11.789                      | 4                     |
| Phospholysine phosphohistidine inorganic pyrophosphate phosphatase | 29147                 | IPI00005474.5 | 22.963                      | 3                     |
| Phosphomannomutase 2                                               | 28064                 | IPI00006092.1 | 12.195                      | 3                     |
| Phosphomevalonate kinase                                           | 21850                 | IPI00220648.4 | 42.932                      | 7                     |
| Phosphopantothenate--cysteine ligase                               | 33984                 | IPI00023987.5 | 10.611                      | 3                     |
| Phosphoprotein enriched in astrocytes 15                           | 17296                 | IPI00014850.3 | 27.815                      | 4                     |
| Phosphoribosyl pyrophosphate synthetase-associated protein 1       | 39369                 | IPI00291578.5 | 10.393                      | 2                     |
| Phosphoribosyl pyrophosphate synthetase-associated protein 2       | 40899                 | IPI00003168.1 | 28.726                      | 7                     |
| Phosphoribosylformylglycinamide synthase                           | 144573                | IPI00004534.3 | 12.182                      | 8                     |
| Phosphorylated CTD interacting factor 1                            | 80618                 | IPI00014865.3 | 7.955                       | 3                     |
| Phosphotriesterase related protein                                 | 38993                 | IPI00100933.1 | 26.361                      | 5                     |

| Protein Description                                             | Molecular Weight (Da) | IPI Number    | Total Sequence Coverage (%) | Total Unique Peptides |
|-----------------------------------------------------------------|-----------------------|---------------|-----------------------------|-----------------------|
| PHP14 protein                                                   | 13784                 | IPI00549231.1 | 60                          | 8                     |
| Pirin                                                           | 32093                 | IPI00012575.1 | 16.897                      | 2                     |
| PIST                                                            | 50489                 | IPI00186721.2 | 14.069                      | 4                     |
| Pituitary adenylate cyclase activating polypeptide precursor    | 18766                 | IPI00000027.1 | 19.318                      | 3                     |
| Placental ribonuclease inhibitor                                | 49810                 | IPI00550069.2 | 41.087                      | 13                    |
| Plakoglobin                                                     | 81693                 | IPI00420079.2 | 18.926                      | 11                    |
| Plakophilin 3                                                   | 87029                 | IPI00026952.1 | 21.455                      | 8                     |
| Plasma protease C1 inhibitor precursor                          | 55119                 | IPI00291866.3 | 15.2                        | 5                     |
| Plasma retinol-binding protein precursor                        | 22995                 | IPI00022420.3 | 54.726                      | 9                     |
| Plasma serine protease inhibitor precursor                      | 45673                 | IPI00007221.1 | 7.389                       | 3                     |
| Plasminogen activator inhibitor-2 precursor                     | 46566                 | IPI00007117.1 | 12.289                      | 4                     |
| Plastin 3                                                       | 70766                 | IPI00216694.1 | 23.016                      | 10                    |
| Platelet-activating factor acetylhydrolase IB alpha subunit     | 46477                 | IPI00218728.2 | 23.961                      | 7                     |
| Platelet-activating factor acetylhydrolase IB beta subunit      | 25553                 | IPI00026546.1 | 31.441                      | 5                     |
| Platelet-activating factor acetylhydrolase IB gamma subunit     | 25718                 | IPI00014808.1 | 35.931                      | 5                     |
| PLD3 protein                                                    | 54671                 | IPI00328243.1 | 11.633                      | 4                     |
| Pleckstrin homology domain-containing protein family A member 6 | 117042                | IPI00007248.5 | 7.252                       | 4                     |
| PNN protein                                                     | 81565                 | IPI00418458.1 | 12.273                      | 7                     |
| Poly                                                            | 37474                 | IPI00016610.2 | 48.034                      | 10                    |
| Poly                                                            | 72345                 | IPI00012726.3 | 10.758                      | 5                     |
| Poly [ADP-ribose] polymerase-1                                  | 112881                | IPI00449049.2 | 35.439                      | 28                    |
| Poly [ADP-ribose] polymerase-4                                  | 192466                | IPI00296909.3 | 4.06                        | 4                     |
| Poly(A) binding Protein, nuclear 1                              | 32729                 | IPI00005792.1 | 25.49                       | 3                     |
| Poly(A) Polymerase alPha                                        | 82791                 | IPI00384028.4 | 3.356                       | 2                     |
| Poly(rC)-binding Protein 2 isoform b                            | 38197                 | IPI00012066.1 | 52.762                      | 11                    |
| Polyadenylate-binding protein 5                                 | 43303                 | IPI00061206.1 | 8.901                       | 2                     |
| Polybromo-1                                                     | 182003                | IPI00023097.1 | 2.086                       | 2                     |
| Polyhomeotic 2-like, isoform b                                  | 35737                 | IPI00419684.2 | 10.836                      | 2                     |
| Polymerase delta interacting protein 2                          | 41908                 | IPI00165506.3 | 19.891                      | 3                     |
| Polymeric-immunoglobulin receptor precursor                     | 83262                 | IPI00004573.1 | 14.791                      | 7                     |
| Polypeptide N-acetylgalactosaminyltransferase 2                 | 64691                 | IPI00004669.1 | 7.881                       | 3                     |
| Pombe Cdc5-related protein                                      | 92194                 | IPI00465294.2 | 24.065                      | 11                    |
| Potassium channel modulatory factor 1                           | 42609                 | IPI00306661.2 | 14.767                      | 3                     |
| Potassium channel tetramerisation domain containing protein 12  | 35679                 | IPI00060715.1 | 43.385                      | 14                    |
| PRA1 family protein 2                                           | 19246                 | IPI00026994.3 | 16.854                      | 3                     |
| PRA1 family protein 3                                           | 21600                 | IPI00007426.1 | 20.213                      | 5                     |
| Pre-B cell enhancing factor precursor                           | 55487                 | IPI00018873.1 | 59.878                      | 24                    |

| Protein Description                                                                                                                                                                       | Molecular Weight (Da) | IPI Number    | Total Sequence Coverage (%) | Total Unique Peptides |
|-------------------------------------------------------------------------------------------------------------------------------------------------------------------------------------------|-----------------------|---------------|-----------------------------|-----------------------|
| Pre-B-cell leukemia transcription factor interacting protein 1                                                                                                                            | 80594                 | IPI00332106.2 | 14.364                      | 8                     |
| PREDICTED: C219-reactive peptide                                                                                                                                                          | 241001                | IPI00374065.2 | 11.172                      | 18                    |
| PREDICTED: chromosome 19 open reading frame 7                                                                                                                                             | 154376                | IPI00187011.3 | 4.526                       | 4                     |
| PREDICTED: DKFZP586J0619 protein                                                                                                                                                          | 317373                | IPI00175295.6 | 1.174                       | 3                     |
| PREDICTED: fatso                                                                                                                                                                          | 64295                 | IPI00028277.4 | 17.594                      | 6                     |
| PREDICTED: hypothetical protein BC009862                                                                                                                                                  | 124521                | IPI00038139.5 | 12.308                      | 8                     |
| PREDICTED: hypothetical protein KIAA1833                                                                                                                                                  | 138768                | IPI00176375.2 | 2.464                       | 2                     |
| PREDICTED: hypothetical protein XP_059492                                                                                                                                                 | 16609                 | IPI00046828.4 | 24.306                      | 2                     |
| PREDICTED: hypothetical protein XP_371691                                                                                                                                                 | 12145                 | IPI00397994.1 | 23.009                      | 2                     |
| PREDICTED: KIAA0368 protein                                                                                                                                                               | 214598                | IPI00157790.4 | 10.331                      | 13                    |
| PREDICTED: KIAA0540 protein                                                                                                                                                               | 310444                | IPI00297242.4 | 1.694                       | 3                     |
| PREDICTED: KIAA0674                                                                                                                                                                       | 145814                | IPI00401282.2 | 9.648                       | 10                    |
| PREDICTED: KIAA0819 protein                                                                                                                                                               | 127140                | IPI00016356.2 | 6.69                        | 3                     |
| PREDICTED: KIAA1543                                                                                                                                                                       | 137793                | IPI00176702.3 | 1.803                       | 2                     |
| PREDICTED: mesoderm development candidate 2                                                                                                                                               | 28971                 | IPI00399089.3 | 11.45                       | 2                     |
| PREDICTED: myosin VB                                                                                                                                                                      | 265640                | IPI00479962.1 | 1.67                        | 2                     |
| PREDICTED: plexin B2                                                                                                                                                                      | 209481                | IPI00398435.2 | 6.858                       | 7                     |
| PREDICTED: protein phosphatase 1, regulatory (inhibitor) subunit 14B                                                                                                                      | 34924                 | IPI00398922.2 | 13.982                      | 2                     |
| PREDICTED: protein phosphatase 1H (PP2C domain containing)                                                                                                                                | 56413                 | IPI00375884.3 | 13.813                      | 3                     |
| PREDICTED: RNA binding motif protein 27                                                                                                                                                   | 118645                | IPI00292975.2 | 4.34                        | 2                     |
| PREDICTED: septin 8                                                                                                                                                                       | 86599                 | IPI00022082.4 | 13.155                      | 8                     |
| PREDICTED: signal-induced proliferation-associated 1 like 3                                                                                                                               | 187222                | IPI00297254.3 | 6.206                       | 7                     |
| PREDICTED: similar to 40S ribosomal protein SA (p40) (34/67 kDa laminin receptor) (Colon carcinoma laminin-binding protein) (NEM/1CHD4) (Multidrug resistance-associated protein MGr1-Ag) | 32723                 | IPI00398958.1 | 36.271                      | 8                     |
| PREDICTED: similar to 60S ribosomal protein L10 (QM protein homolog)                                                                                                                      | 24611                 | IPI00374260.4 | 36.916                      | 8                     |
| PREDICTED: similar to 60S ribosomal protein L17 (L23) (Amino acid starvation-induced protein) (ASI)                                                                                       | 23549                 | IPI00375239.2 | 13.084                      | 4                     |
| PREDICTED: similar to 60S ribosomal protein L23a                                                                                                                                          | 16766                 | IPI00397958.2 | 31.724                      | 3                     |
| PREDICTED: similar to 60S ribosomal protein L27a                                                                                                                                          | 16612                 | IPI00398135.2 | 32.432                      | 4                     |
| PREDICTED: similar to bA486O22.3 (similar to RPS3A (ribosomal protein S3A))                                                                                                               | 23649                 | IPI00025419.3 | 33.649                      | 11                    |
| PREDICTED: similar to bA92K2.2 (similar to ubiquitin)                                                                                                                                     | 20411                 | IPI00397808.2 | 23.464                      | 5                     |
| PREDICTED: similar to CG14903-PA                                                                                                                                                          | 26651                 | IPI00430803.2 | 25.63                       | 4                     |
| PREDICTED: similar to cytoskeletal beta actin                                                                                                                                             | 36013                 | IPI00455475.1 | 7.302                       | 4                     |
| PREDICTED: similar to elongation factor 1 alpha                                                                                                                                           | 51294                 | IPI00455628.1 | 28.33                       | 10                    |
| PREDICTED: similar to fibrillarin                                                                                                                                                         | 34385                 | IPI00235647.5 | 28.037                      | 5                     |
| PREDICTED: similar to FLJ00052 protein                                                                                                                                                    | 37505                 | IPI00185877.7 | 10.736                      | 2                     |

| Protein Description                                                                                                                | Molecular Weight (Da) | IPI Number    | Total Sequence Coverage (%) | Total Unique Peptides |
|------------------------------------------------------------------------------------------------------------------------------------|-----------------------|---------------|-----------------------------|-----------------------|
| PREDICTED: similar to Glyceraldehyde 3-phosphate dehydrogenase (GAPDH) (38 kDa BFA-dependent ADP-ribosylation substrate) (BARS-38) | 20907                 | IPI00457253.1 | 6.283                       | 2                     |
| PREDICTED: similar to Glyceraldehyde 3-phosphate dehydrogenase, liver (GAPDH)                                                      | 55334                 | IPI00247601.4 | 12.766                      | 7                     |
| PREDICTED: similar to H2A histone family, member Z                                                                                 | 13440                 | IPI00249267.1 | 25                          | 2                     |
| PREDICTED: similar to heat shock 70kD protein binding protein                                                                      | 21888                 | IPI00457060.1 | 21.939                      | 3                     |
| PREDICTED: similar to heat shock 70kD protein binding protein                                                                      | 38195                 | IPI00454747.1 | 9.038                       | 2                     |
| PREDICTED: similar to Heat shock protein HSP 90-beta (HSP 84)                                                                      | 16884                 | IPI00455599.1 | 12.676                      | 3                     |
| PREDICTED: similar to hepatitis C virus core-binding protein 6                                                                     | 20665                 | IPI00171761.3 | 12.698                      | 2                     |
| PREDICTED: similar to heterogeneous nuclear ribonucleoprotein A3                                                                   | 12789                 | IPI00398124.3 | 18.644                      | 4                     |
| PREDICTED: similar to hypothetical protein                                                                                         | 101689                | IPI00456887.1 | 14.049                      | 9                     |
| PREDICTED: similar to KIF27C                                                                                                       | 101353                | IPI00399121.2 | 4.576                       | 7                     |
| PREDICTED: similar to large subunit ribosomal protein L36a                                                                         | 12330                 | IPI00176574.1 | 18.868                      | 4                     |
| PREDICTED: similar to membrane targeting translocation system protein like (2A562)                                                 | 30314                 | IPI00402083.1 | 14.234                      | 2                     |
| PREDICTED: similar to myocyte nuclear factor                                                                                       | 264161                | IPI00465123.3 | 1.705                       | 2                     |
| PREDICTED: similar to Nonhistone chromosomal protein HMG-17 (High-mobility group nucleosome binding domain 2)                      | 9459                  | IPI00181126.3 | 50                          | 12                    |
| PREDICTED: similar to Phosphoglycerate mutase 1 (Phosphoglycerate mutase isozyme B) (PGAM-B) (BPG-dependent PGAM 1)                | 22337                 | IPI00456889.1 | 23.153                      | 5                     |
| PREDICTED: similar to RAN-binding protein 2-like 1 isoform 1                                                                       | 197166                | IPI00375793.3 | 4.323                       | 7                     |
| PREDICTED: similar to ribosomal protein L4                                                                                         | 39799                 | IPI00102427.3 | 26.136                      | 9                     |
| PREDICTED: similar to ribosomal protein S26                                                                                        | 17035                 | IPI00399281.2 | 15.789                      | 2                     |
| PREDICTED: similar to RIKEN cDNA 4732495G21 gene                                                                                   | 41976                 | IPI00003269.1 | 30.851                      | 12                    |
| PREDICTED: similar to RIKEN cDNA D330038I09                                                                                        | 100184                | IPI00298308.5 | 20.22                       | 12                    |
| PREDICTED: similar to RP2 protein, testosterone-regulated - ricefield mouse (Mus caroli)                                           | 50451                 | IPI00376151.2 | 9.43                        | 2                     |
| PREDICTED: similar to SMT3 suppressor of mif two 3 homolog 2                                                                       | 17744                 | IPI00140827.2 | 35                          | 3                     |
| PREDICTED: similar to Transmembrane protein 16F                                                                                    | 106096                | IPI00151710.6 | 3.736                       | 2                     |
| PREDICTED: similar to Triosephosphate isomerase (TIM)                                                                              | 26926                 | IPI00383071.1 | 36.948                      | 10                    |
| PREDICTED: similar to tropomyosin 3                                                                                                | 24049                 | IPI00455563.1 | 13.876                      | 3                     |
| PREDICTED: similar to tropomyosin 4                                                                                                | 24911                 | IPI00374397.2 | 34.579                      | 4                     |
| PREDICTED: similar to vimentin-type intermediate filament associated coiled-coil protein                                           | 18337                 | IPI00175793.1 | 34.32                       | 3                     |
| PREDICTED: tangerin                                                                                                                | 161756                | IPI00296421.2 | 1.838                       | 2                     |
| PREDICTED: U2-associated SR140 protein                                                                                             | 123949                | IPI00143753.3 | 5.346                       | 5                     |
| Prefoldin subunit 1                                                                                                                | 14202                 | IPI00000051.4 | 38.525                      | 5                     |



| Protein Description                                         | Molecular Weight (Da) | IPI Number    | Total Sequence Coverage (%) | Total Unique Peptides |
|-------------------------------------------------------------|-----------------------|---------------|-----------------------------|-----------------------|
| Prefoldin subunit 2                                         | 16638                 | IPI00006052.3 | 58.442                      | 8                     |
| Prefoldin subunit 4                                         | 15305                 | IPI00015891.1 | 33.582                      | 4                     |
| Prefoldin subunit 5                                         | 17317                 | IPI00015361.1 | 40.909                      | 4                     |
| Prefoldin subunit 6                                         | 14574                 | IPI00005657.1 | 62.016                      | 7                     |
| Premature ovarian failure, 1B                               | 68653                 | IPI00103242.4 | 21.176                      | 10                    |
| Pre-mRNA 3'end processing factor FIP1                       | 66487                 | IPI00395337.1 | 11.616                      | 5                     |
| Pre-mRNA branch site protein p14                            | 14576                 | IPI00032827.1 | 36                          | 3                     |
| Pre-mRNA cleavage factor I 25 kDa subunit                   | 26211                 | IPI00012995.1 | 37.004                      | 7                     |
| Pre-mRNA splicing factor ATP-dependent RNA helicase PRP16   | 140385                | IPI00294211.1 | 3.667                       | 3                     |
| Prenylcysteine oxidase precursor                            | 56575                 | IPI00384280.4 | 13.861                      | 4                     |
| Prepro-alpha2(I) collagen precursor                         | 129258                | IPI00164755.3 | 3.367                       | 4                     |
| PRKAR2A protein                                             | 43040                 | IPI00063234.1 | 31.937                      | 12                    |
| PRO0868                                                     | 38714                 | IPI00181409.3 | 40.58                       | 12                    |
| Probable ATP-dependent helicase DDX48                       | 46841                 | IPI00009328.2 | 33.82                       | 11                    |
| Probable ATP-dependent RNA helicase p54                     | 54383                 | IPI00030320.3 | 22.36                       | 6                     |
| Probable D-tyrosyl-tRNA                                     | 23409                 | IPI00152692.2 | 13.397                      | 3                     |
| Probable endonuclease KIAA0830 precursor                    | 54981                 | IPI00001952.5 | 16.6                        | 5                     |
| Probable O-sialoglycoprotein endopeptidase                  | 36403                 | IPI00015809.1 | 9.851                       | 2                     |
| Probable oxidoreductase KIAA1576                            | 45870                 | IPI00030578.2 | 14.797                      | 5                     |
| Probable RNA-dependent helicase p68                         | 69105                 | IPI00017617.1 | 34.039                      | 17                    |
| Probable rRNA processing protein EBP2                       | 34798                 | IPI00009954.1 | 13.399                      | 3                     |
| Probable tyrosyl-tRNA synthetase, mitochondrial precursor   | 53166                 | IPI00165092.3 | 5.66                        | 2                     |
| Probable UPF0334 kinase-like protein                        | 20700                 | IPI00031570.1 | 45.789                      | 6                     |
| Procollagen-lysine,2-oxoglutarate 5-dioxygenase 2 precursor | 84610                 | IPI00298799.1 | 14.654                      | 7                     |
| Procollagen-lysine,2-oxoglutarate 5-dioxygenase 3 precursor | 84731                 | IPI00030255.1 | 7.317                       | 4                     |
| Profilin 2 isoform a                                        | 15036                 | IPI00219468.3 | 35                          | 6                     |
| Profilin-1                                                  | 14914                 | IPI00216691.4 | 69.065                      | 12                    |
| Programmed cell death protein 5                             | 14145                 | IPI00023640.2 | 49.194                      | 6                     |
| Programmed cell death protein 6                             | 21855                 | IPI00025277.3 | 34.031                      | 4                     |
| Prohibitin                                                  | 29786                 | IPI00017334.1 | 69.853                      | 18                    |
| Prolactin regulatory element-binding protein                | 45440                 | IPI00033349.3 | 28.297                      | 8                     |
| Proliferating cell nuclear antigen                          | 28750                 | IPI00021700.1 | 10.728                      | 3                     |
| Proliferating-cell nucleolar antigen p120                   | 94020                 | IPI00294891.3 | 3.392                       | 3                     |
| Proliferation-associated protein 2G4                        | 43759                 | IPI00299000.1 | 43.401                      | 15                    |
| Proline synthetase co-transcribed bacterial homolog protein | 30325                 | IPI00016346.1 | 26.545                      | 6                     |
| Proline-rich protein PRCC                                   | 52386                 | IPI00294618.1 | 4.888                       | 2                     |
| Prolyl endopeptidase                                        | 80712                 | IPI00008164.1 | 9.437                       | 5                     |

| Protein Description                                           | Molecular Weight (Da) | IPI Number    | Total Sequence Coverage (%) | Total Unique Peptides |
|---------------------------------------------------------------|-----------------------|---------------|-----------------------------|-----------------------|
| Propionyl Coenzyme A carboxylase, alpha polypeptide           | 80235                 | IPI00465032.2 | 20.822                      | 10                    |
| Propionyl-CoA carboxylase beta chain, mitochondrial precursor | 58169                 | IPI00007247.3 | 12.245                      | 5                     |
| ProSAAS precursor                                             | 27356                 | IPI00002280.1 | 65.769                      | 14                    |
| Prostaglandin F2 receptor negative regulator precursor        | 98495                 | IPI00022048.8 | 6.03                        | 3                     |
| Prostate apoptosis response protein par-4                     | 36744                 | IPI00001871.1 | 17.544                      | 2                     |
| Protease serine 2 isoform B                                   | 28119                 | IPI00011695.2 | 22.989                      | 5                     |
| Proteasome (Prosome, macropain) 26S subunit, non-ATPase, 4    | 41053                 | IPI00022694.2 | 10.526                      | 3                     |
| Proteasome activator complex subunit 1                        | 28705                 | IPI00030154.1 | 59.839                      | 18                    |
| Proteasome activator complex subunit 2                        | 27213                 | IPI00384051.4 | 35.714                      | 8                     |
| Proteasome alPha 3 subunit isoform 2                          | 27630                 | IPI00171199.3 | 35.887                      | 9                     |
| Proteasome inhibitor PI31 subunit                             | 29754                 | IPI00009949.1 | 14.022                      | 2                     |
| Proteasome subunit alpha type 2                               | 25751                 | IPI00219622.2 | 57.94                       | 12                    |
| Proteasome subunit alpha type 4                               | 29465                 | IPI00299155.5 | 26.437                      | 6                     |
| Proteasome subunit alpha type 5                               | 26394                 | IPI00291922.2 | 37.759                      | 9                     |
| Proteasome subunit alpha type 6                               | 27382                 | IPI00029623.1 | 37.398                      | 9                     |
| Proteasome subunit beta type                                  | 28791                 | IPI00375704.1 | 24.436                      | 6                     |
| Proteasome subunit beta type                                  | 29171                 | IPI00291936.3 | 21.591                      | 3                     |
| Proteasome subunit beta type 1                                | 26472                 | IPI00025019.3 | 59.751                      | 13                    |
| Proteasome subunit beta type 10 precursor                     | 28918                 | IPI00027933.1 | 27.106                      | 4                     |
| Proteasome subunit beta type 2                                | 22822                 | IPI00028006.1 | 45.771                      | 6                     |
| Proteasome subunit beta type 3                                | 22933                 | IPI00028004.2 | 25.854                      | 3                     |
| Proteasome subunit beta type 6 precursor                      | 25341                 | IPI00000811.2 | 55.649                      | 7                     |
| Proteasome subunit beta type 7 precursor                      | 29946                 | IPI00003217.3 | 19.134                      | 4                     |
| Protein                                                       | 23476                 | IPI00411463.2 | 37.255                      | 11                    |
| Protein activator of the interferon-induced protein kinase    | 34383                 | IPI00021167.3 | 37.38                       | 8                     |
| Protein AD-016                                                | 21160                 | IPI00032848.1 | 13.402                      | 2                     |
| Protein arginine N-methyltransferase 5                        | 72507                 | IPI00441473.2 | 13.522                      | 4                     |
| Protein associated with Myc                                   | 510074                | IPI00289776.1 | 0.927                       | 3                     |
| Protein BAT5                                                  | 63072                 | IPI00033075.2 | 8.977                       | 3                     |
| Protein C11orf15 precursor                                    | 22517                 | IPI00009880.1 | 21.212                      | 2                     |
| Protein C14orf166                                             | 28051                 | IPI00006980.1 | 53.279                      | 13                    |
| Protein C14orf4                                               | 82607                 | IPI00019205.1 | 5.402                       | 3                     |
| Protein C19orf10 precursor                                    | 18783                 | IPI00056357.3 | 32.948                      | 6                     |
| Protein C20orf178                                             | 24935                 | IPI00025974.3 | 42.411                      | 9                     |
| Protein C20orf77                                              | 36877                 | IPI00009659.3 | 34.969                      | 6                     |
| Protein C2orf4                                                | 33711                 | IPI00032426.1 | 14.478                      | 2                     |
| Protein C7orf21                                               | 26245                 | IPI00027773.3 | 12.602                      | 2                     |

| Protein Description                                                        | Molecular Weight (Da) | IPI Number    | Total Sequence Coverage (%) | Total Unique Peptides |
|----------------------------------------------------------------------------|-----------------------|---------------|-----------------------------|-----------------------|
| Protein C7orf24                                                            | 20994                 | IPI00031564.1 | 35.106                      | 6                     |
| Protein CGI-126                                                            | 19446                 | IPI00294495.3 | 11.377                      | 2                     |
| Protein CGI-38                                                             | 18974                 | IPI00306413.3 | 51.705                      | 9                     |
| Protein disulfide-isomerase A2 precursor                                   | 58170                 | IPI00011571.2 | 36.952                      | 15                    |
| Protein disulfide-isomerase A3 precursor                                   | 56747                 | IPI00025252.1 | 78.416                      | 55                    |
| Protein disulfide-isomerase A4 precursor                                   | 72887                 | IPI00009904.1 | 56.744                      | 54                    |
| Protein disulfide-isomerase A5 precursor                                   | 59556                 | IPI00031479.1 | 15.8                        | 5                     |
| Protein disulfide-isomerase precursor                                      | 57081                 | IPI00010796.1 | 82.087                      | 50                    |
| Protein expressed in T-cells and eosinophils in atopic dermatitis          | 52591                 | IPI00172656.6 | 8.539                       | 3                     |
| Protein FAM34A                                                             | 43061                 | IPI00022447.3 | 7.027                       | 2                     |
| Protein FAM3C precursor                                                    | 24665                 | IPI00021923.1 | 46.256                      | 9                     |
| Protein FAM49B                                                             | 36725                 | IPI00303318.2 | 24.691                      | 7                     |
| Protein farnesyltransferase/geranylgeranyltransferase type I alpha subunit | 44381                 | IPI00026813.1 | 8.179                       | 2                     |
| Protein KIAA0174                                                           | 39725                 | IPI00024660.1 | 8.516                       | 3                     |
| Protein KIAA0196                                                           | 134201                | IPI00029175.3 | 6.644                       | 6                     |
| Protein kinase C and casein kinase substrate in neurons protein 3          | 48502                 | IPI00329572.3 | 9.882                       | 3                     |
| Protein kinase C, alpha type                                               | 76583                 | IPI00385449.3 | 5.961                       | 2                     |
| Protein kinase N1                                                          | 103926                | IPI00002803.5 | 2.76                        | 2                     |
| Protein kinase N2                                                          | 111964                | IPI00002804.1 | 4.167                       | 2                     |
| Protein phosphatase 2, regulatory subunit B, delta isoform, isoform 1      | 52010                 | IPI00470920.1 | 5.74                        | 2                     |
| Protein phosphatase 2A, regulatory subunit B'                              | 36752                 | IPI00477616.1 | 53.251                      | 9                     |
| Protein phosphatase 2C gamma isoform                                       | 59235                 | IPI00006167.1 | 18.681                      | 7                     |
| Protein phosphatase inhibitor 2                                            | 22870                 | IPI00220402.2 | 10.784                      | 2                     |
| Protein phosphatase type 1 catalytic subunit                               | 38606                 | IPI00027423.2 | 29.619                      | 9                     |
| Protein TMED8                                                              | 35718                 | IPI00292812.5 | 19.692                      | 3                     |
| Protein transport protein Sec23A                                           | 86091                 | IPI00017375.1 | 10.196                      | 4                     |
| Protein transport protein Sec23B                                           | 86424                 | IPI00017376.2 | 34.42                       | 15                    |
| Protein transport protein Sec24B                                           | 137702                | IPI00030851.1 | 3.391                       | 3                     |
| Protein transport protein Sec24C                                           | 121035                | IPI00024661.3 | 11.644                      | 9                     |
| Protein transport protein Sec61 alpha subunit isoform 1                    | 52099                 | IPI00218466.4 | 6.316                       | 2                     |
| Protein tyrosine phosphatase HD-PTP                                        | 178861                | IPI00034006.1 | 13.936                      | 14                    |
| Protein tyrosine phosphatase-like member b                                 | 28350                 | IPI00384497.1 | 5.118                       | 2                     |
| Protein-L-isoaspartate (D-aspartate) O-methyltransferase                   | 24664                 | IPI00024989.7 | 72.807                      | 16                    |
| Prothymosin alpha                                                          | 12078                 | IPI00015550.5 | 30                          | 6                     |
| Protoporphyrinogen oxidase                                                 | 50734                 | IPI00031357.1 | 10.692                      | 3                     |
| PRP19/PSO4 homolog                                                         | 55146                 | IPI00004968.1 | 51.984                      | 14                    |
| Prp5-like DEAD-box protein                                                 | 117389                | IPI00329791.7 | 8.818                       | 6                     |

| Protein Description                                                                      | Molecular Weight (Da) | IPI Number    | Total Sequence Coverage (%) | Total Unique Peptides |
|------------------------------------------------------------------------------------------|-----------------------|---------------|-----------------------------|-----------------------|
| PRP8 protein                                                                             | 273611                | IPI00007928.3 | 10.921                      | 17                    |
| PTD012 protein                                                                           | 35033                 | IPI00072044.2 | 53.333                      | 13                    |
| Pur-beta                                                                                 | 33220                 | IPI00045051.1 | 40.705                      | 7                     |
| Puromycin-sensitive aminopeptidase                                                       | 103211                | IPI00026216.4 | 32.427                      | 21                    |
| Putative 40-2-3 protein                                                                  | 35796                 | IPI00289907.3 | 7.547                       | 2                     |
| Putative adenosylhomocysteinase 2                                                        | 55592                 | IPI00182938.6 | 21.6                        | 8                     |
| Putative adenosylhomocysteinase 3                                                        | 66678                 | IPI00101645.3 | 14.239                      | 7                     |
| Putative ATG/GTP binding protein precursor                                               | 26454                 | IPI00024551.1 | 20.661                      | 3                     |
| Putative ATP-dependent Clp protease proteolytic subunit, mitochondrial precursor         | 30161                 | IPI00003870.1 | 22.022                      | 3                     |
| Putative ATP-dependent mitochondrial RNA helicase                                        | 88137                 | IPI00293430.3 | 3.299                       | 2                     |
| Putative C10 protein                                                                     | 13170                 | IPI00016925.1 | 26.19                       | 2                     |
| Putative dynein light chain protein DJ8B22.1                                             | 10528                 | IPI00294632.1 | 14.607                      | 2                     |
| Putative eukaryotic translation initiation factor 3 subunit                              | 146577                | IPI00024425.2 | 3.972                       | 4                     |
| Putative lipid kinase                                                                    | 47107                 | IPI00019353.1 | 10.19                       | 2                     |
| Putative NADPH oxidase/oxidase DUOX2                                                     | 175296                | IPI00299627.1 | 16.408                      | 13                    |
| Putative NFkB activating protein                                                         | 103998                | IPI00302647.4 | 3.365                       | 2                     |
| Putative RNA-binding protein 16                                                          | 140433                | IPI00298884.3 | 2.832                       | 2                     |
| Putative RNA-binding protein 3                                                           | 17160                 | IPI00024320.1 | 54.777                      | 6                     |
| Putative secreted protein                                                                | 38179                 | IPI00006372.2 | 6.818                       | 2                     |
| Putative sulfhydryl oxidase precursor                                                    | 77286                 | IPI00376394.1 | 4.155                       | 2                     |
| Putative T1/ST2 receptor binding protein                                                 | 25190                 | IPI00009976.1 | 12.335                      | 2                     |
| Pyridoxal phosphate phosphatase                                                          | 31678                 | IPI00025340.3 | 10.473                      | 2                     |
| Pyridoxine-5'-phosphate oxidase                                                          | 29969                 | IPI00018272.3 | 38.697                      | 7                     |
| Pyruvate carboxylase, mitochondrial precursor                                            | 129551                | IPI00299402.1 | 19.015                      | 13                    |
| Pyruvate dehydrogenase [lipoamide] kinase isozyme 3, mitochondrial precursor             | 46909                 | IPI00014849.1 | 15.517                      | 4                     |
| Pyruvate dehydrogenase [Lipoamide]-phosphatase 1, mitochondrial precursor                | 61181                 | IPI00218971.2 | 5.762                       | 2                     |
| Pyruvate dehydrogenase E1 component alpha subunit, somatic form, mitochondrial precursor | 43268                 | IPI00306301.1 | 45.385                      | 12                    |
| Pyruvate dehydrogenase protein X component, mitochondrial precursor                      | 54089                 | IPI00298423.3 | 9.581                       | 5                     |
| Pyruvate kinase 3 isoform 2                                                              | 58025                 | IPI00220644.6 | 3.202                       | 3                     |
| Pyruvate kinase M2                                                                       | 57744                 | IPI00383237.3 | 81.887                      | 58                    |
| QIL1 protein                                                                             | 13079                 | IPI00329373.2 | 33.898                      | 3                     |
| Queuine tRNA-ribosyltransferase                                                          | 46879                 | IPI00074010.1 | 9.832                       | 2                     |
| Quiescin Q6                                                                              | 82526                 | IPI00003590.1 | 13.253                      | 7                     |
| Quinone oxidoreductase                                                                   | 35185                 | IPI00000792.1 | 51.976                      | 18                    |
| R33083_1                                                                                 | 48565                 | IPI00020795.1 | 4.861                       | 2                     |
| Rab GDP dissociation inhibitor alpha                                                     | 50550                 | IPI00010154.3 | 55.034                      | 27                    |

| Protein Description                             | Molecular Weight (Da) | IPI Number    | Total Sequence Coverage (%) | Total Unique Peptides |
|-------------------------------------------------|-----------------------|---------------|-----------------------------|-----------------------|
| Rab GDP dissociation inhibitor beta             | 50631                 | IPI00031461.1 | 52.809                      | 24                    |
| Rab11 interacting protein Rip11                 | 70372                 | IPI00022033.4 | 5.513                       | 2                     |
| Rab11-family interacting protein 1B             | 137081                | IPI00419433.1 | 4.832                       | 4                     |
| Rab3-GAP regulatory domain                      | 155985                | IPI00290518.1 | 8.471                       | 8                     |
| Rab6 GTPase activating protein, GAPCenA         | 114071                | IPI00016702.1 | 4.514                       | 3                     |
| Rabconnectin                                    | 339543                | IPI00152542.1 | 0.922                       | 2                     |
| Rac-GTP binding protein-like protein            | 79524                 | IPI00217536.2 | 4.342                       | 3                     |
| Radixin                                         | 68521                 | IPI00017367.1 | 27.101                      | 14                    |
| RAI14 isoform                                   | 110354                | IPI00292953.2 | 9.156                       | 6                     |
| RalA binding protein 1                          | 75885                 | IPI00009544.2 | 8.104                       | 3                     |
| Ran GTPase-activating protein 1                 | 63502                 | IPI00294879.1 | 26.405                      | 12                    |
| Ran-binding protein 2                           | 357993                | IPI00221325.2 | 6.7                         | 15                    |
| Ran-specific GTPase-activating protein          | 23296                 | IPI00414127.3 | 33.333                      | 4                     |
| Rap1 GTPase activating protein 2b               | 79992                 | IPI00401939.5 | 15.753                      | 8                     |
| RAP1, GTPase activating protein 1               | 73428                 | IPI00026144.3 | 8.133                       | 4                     |
| Rap2 interacting protein x                      | 52931                 | IPI00033573.3 | 15.352                      | 7                     |
| Ras GTPase-activating protein 4                 | 90401                 | IPI00012059.7 | 5.23                        | 2                     |
| Ras GTPase-activating-like protein IQGAP1       | 189134                | IPI00009342.1 | 43.633                      | 53                    |
| Ras suppressor protein 1                        | 31390                 | IPI00017256.5 | 50                          | 7                     |
| Ras-GTPase-activating protein binding protein 1 | 52132                 | IPI00012442.1 | 39.27                       | 13                    |
| Ras-related C3 botulinum toxin substrate 2      | 21415                 | IPI00010270.1 | 9.375                       | 2                     |
| Ras-related protein Rab-10                      | 22527                 | IPI00016513.3 | 21.5                        | 5                     |
| Ras-related protein Rab-11A                     | 24378                 | IPI00429190.1 | 38.426                      | 5                     |
| Ras-related protein Rab-11B                     | 24473                 | IPI00020436.2 | 40.367                      | 8                     |
| Ras-related protein Rab-13                      | 22760                 | IPI00016373.3 | 18.227                      | 3                     |
| Ras-related protein Rab-14                      | 23912                 | IPI00291928.3 | 55.349                      | 11                    |
| Ras-related protein Rab-18                      | 22963                 | IPI00014577.1 | 11.65                       | 2                     |
| Ras-related protein Rab-1B                      | 22157                 | IPI00008964.3 | 35.323                      | 8                     |
| Ras-related protein Rab-21                      | 24332                 | IPI00007755.1 | 24.889                      | 4                     |
| Ras-related protein Rab-24                      | 23109                 | IPI00056496.1 | 22.66                       | 4                     |
| Ras-related protein Rab-2A                      | 23531                 | IPI00031169.1 | 54.717                      | 12                    |
| Ras-related protein Rab-35                      | 23011                 | IPI00300096.4 | 21.891                      | 4                     |
| Ras-related protein Rab-3A                      | 24968                 | IPI00023504.1 | 27.273                      | 5                     |
| Ras-related protein Rab-3B                      | 24742                 | IPI00300562.2 | 34.247                      | 6                     |
| Ras-related protein Rab-3C                      | 25936                 | IPI00061114.1 | 31.718                      | 6                     |
| Ras-related protein Rab-5A                      | 23644                 | IPI00023510.1 | 40                          | 6                     |
| Ras-related protein Rab-5B                      | 23692                 | IPI00017344.3 | 29.302                      | 5                     |

| Protein Description                                         | Molecular Weight (Da) | IPI Number    | Total Sequence Coverage (%) | Total Unique Peptides |
|-------------------------------------------------------------|-----------------------|---------------|-----------------------------|-----------------------|
| Ras-related protein Rab-5C                                  | 31028                 | IPI00016339.3 | 31.119                      | 7                     |
| Ras-related protein Rab-7                                   | 23475                 | IPI00016342.1 | 75.362                      | 14                    |
| Ras-related protein Rab-8A                                  | 23653                 | IPI00028481.1 | 25.121                      | 5                     |
| Ras-related protein Rab-8B                                  | 23569                 | IPI00024282.1 | 14.01                       | 3                     |
| Ras-related protein Rab-9A                                  | 22823                 | IPI00016372.1 | 13.93                       | 2                     |
| Ras-related protein Ral-A                                   | 23552                 | IPI00217519.3 | 33.981                      | 6                     |
| Ras-related protein Ral-B                                   | 23394                 | IPI00004397.1 | 15.049                      | 3                     |
| Ras-related protein Rap-1b                                  | 20812                 | IPI00015148.3 | 52.174                      | 8                     |
| Ras-related protein R-Ras                                   | 23466                 | IPI00020418.1 | 21.56                       | 3                     |
| Ras-related protein R-Ras2                                  | 23385                 | IPI00012512.1 | 19.608                      | 3                     |
| RBM13 protein                                               | 35375                 | IPI00332428.2 | 12.333                      | 2                     |
| RCC1-like                                                   | 56049                 | IPI00465044.2 | 5.172                       | 2                     |
| RCL                                                         | 19097                 | IPI00007926.1 | 54.598                      | 6                     |
| REC14 protein                                               | 33557                 | IPI00019269.2 | 16.393                      | 3                     |
| Receptor expression enhancing protein 5                     | 21479                 | IPI00024670.3 | 19.577                      | 9                     |
| Receptor-interacting serine/threonine-protein kinase 2      | 75883                 | IPI00013773.2 | 4.62                        | 2                     |
| Receptor-type tyrosine-protein phosphatase F precursor      | 211711                | IPI00107831.3 | 2.319                       | 2                     |
| Receptor-type tyrosine-protein phosphatase-like N precursor | 105781                | IPI00004440.1 | 19.203                      | 13                    |
| Red protein                                                 | 65590                 | IPI00011875.1 | 10.952                      | 4                     |
| RELA protein                                                | 27646                 | IPI00027116.5 | 8.537                       | 2                     |
| Remodeling and spacing factor 1                             | 163720                | IPI00290652.4 | 4.65                        | 4                     |
| Replication protein A 14 kDa subunit                        | 13560                 | IPI00017373.1 | 57.025                      | 4                     |
| Replication protein A 70 kDa DNA-binding subunit            | 68095                 | IPI00020127.1 | 8.442                       | 3                     |
| Replication protein A2, 32kDa                               | 38786                 | IPI00013939.2 | 9.497                       | 2                     |
| Retbindin                                                   | 28146                 | IPI00027765.1 | 10.728                      | 2                     |
| Reticulocalbin 1 precursor                                  | 38866                 | IPI00015842.1 | 54.079                      | 13                    |
| Reticulocalbin 2 precursor                                  | 36854                 | IPI00029628.1 | 13.565                      | 3                     |
| Reticulocalbin 3 precursor                                  | 37470                 | IPI00101037.3 | 25.61                       | 5                     |
| Reticulon protein 3                                         | 25593                 | IPI00028946.1 | 5.508                       | 2                     |
| Retinal dehydrogenase 1                                     | 54696                 | IPI00218914.4 | 77.6                        | 47                    |
| Retinoblastoma binding protein 7                            | 52282                 | IPI00395865.3 | 20.469                      | 3                     |
| Retinoblastoma-associated factor 600                        | 573476                | IPI00180305.4 | 4.341                       | 13                    |
| Retinol dehydrogenase 13                                    | 35910                 | IPI00301204.2 | 20.846                      | 4                     |
| Retinol dehydrogenase 14                                    | 36841                 | IPI00177940.2 | 8.333                       | 2                     |
| Retinol-binding protein I, cellular                         | 15709                 | IPI00219718.2 | 67.91                       | 9                     |
| Rho-associated protein kinase 1                             | 158076                | IPI00022542.1 | 3.102                       | 3                     |
| Rho-associated protein kinase 2                             | 160812                | IPI00307155.7 | 10.879                      | 8                     |

| Protein Description                                                        | Molecular Weight (Da) | IPI Number    | Total Sequence Coverage (%) | Total Unique Peptides |
|----------------------------------------------------------------------------|-----------------------|---------------|-----------------------------|-----------------------|
| Rho-GTPase-activating protein 1                                            | 50404                 | IPI00020567.1 | 44.647                      | 14                    |
| Rho-GTPase-activating protein 5                                            | 171460                | IPI00013988.1 | 1.534                       | 2                     |
| Rho-interacting protein 3                                                  | 117990                | IPI00166518.3 | 13.211                      | 7                     |
| Rho-related GTP-binding protein RhoC                                       | 21992                 | IPI00027434.1 | 18.653                      | 4                     |
| Ribonuclease P protein subunit p30                                         | 29303                 | IPI00019196.3 | 11.94                       | 2                     |
| Ribose-5-phosphate isomerase                                               | 26075                 | IPI00026513.4 | 10.127                      | 2                     |
| Ribose-phosphate pyrophosphokinase I                                       | 34681                 | IPI00219616.2 | 23.975                      | 6                     |
| Ribose-phosphate pyrophosphokinase II                                      | 34616                 | IPI00219617.2 | 28.391                      | 6                     |
| Ribosomal pRotein L11                                                      | 20240                 | IPI00219150.4 | 28.652                      | 7                     |
| Ribosomal protein L35                                                      | 14571                 | IPI00412607.4 | 39.024                      | 6                     |
| Ribosomal protein S26 pseudogene 3                                         | 13014                 | IPI00176854.2 | 44.348                      | 4                     |
| Ribosomal protein S27                                                      | 11338                 | IPI00420117.4 | 13                          | 2                     |
| Ribosomal protein S27 (Metallopanstimulin 1) (RPS27) pseudogene            | 9455                  | IPI00451483.1 | 36.905                      | 6                     |
| Ribosomal protein S6 kinase alpha 1                                        | 82671                 | IPI00017305.2 | 11.02                       | 5                     |
| Ribosomal protein S6 kinase alpha 3                                        | 83683                 | IPI00020898.1 | 21.216                      | 13                    |
| Ribosome biogenesis protein Brix                                           | 41375                 | IPI00181728.1 | 15.581                      | 3                     |
| Ribosome biogenesis protein Nop10                                          | 7701                  | IPI00032853.1 | 48.438                      | 2                     |
| Ribosome biogenesis regulatory protein homolog                             | 41168                 | IPI00014253.4 | 13.973                      | 2                     |
| Ring finger protein 1                                                      | 42403                 | IPI00455876.1 | 17.734                      | 5                     |
| RING finger protein 13                                                     | 42787                 | IPI00151036.1 | 9.186                       | 2                     |
| Ring finger protein 20                                                     | 113906                | IPI00251559.8 | 11.157                      | 7                     |
| RNA binding motif protein 10                                               | 94411                 | IPI00024244.3 | 7.62                        | 4                     |
| RNA binding motif protein 15B                                              | 97147                 | IPI00175136.3 | 3.371                       | 2                     |
| RNA binding motif protein 25                                               | 100124                | IPI00004273.4 | 11.862                      | 7                     |
| RNA binding motif protein 30                                               | 40124                 | IPI00027838.1 | 8.078                       | 3                     |
| RNA binding protein                                                        | 299498                | IPI00099730.1 | 5.269                       | 11                    |
| RNA helicase-related protein                                               | 102912                | IPI00409671.1 | 15.458                      | 9                     |
| RNA-binding protein                                                        | 64328                 | IPI00169342.1 | 26.138                      | 8                     |
| RNA-binding region RNP-1 (RNA recognition motif) domain containing protein | 55514                 | IPI00470585.2 | 14.115                      | 5                     |
| RNF40 protein                                                              | 113609                | IPI00162563.3 | 8.492                       | 6                     |
| RNMTL1 protein                                                             | 46992                 | IPI00335589.3 | 4.762                       | 2                     |
| Ro ribonucleoprotein-binding protein 1                                     | 59838                 | IPI00069750.1 | 20.751                      | 5                     |
| RPB11a protein                                                             | 14122                 | IPI00003310.2 | 18.11                       | 2                     |
| RRP5 protein homolog                                                       | 208604                | IPI00400922.4 | 1.283                       | 2                     |
| RTKN protein                                                               | 62628                 | IPI00029834.3 | 9.059                       | 2                     |
| RuvB-like 1                                                                | 50196                 | IPI00021187.3 | 42.325                      | 13                    |
| RuvB-like 2                                                                | 51125                 | IPI00009104.5 | 29.59                       | 13                    |

| Protein Description                                                                  | Molecular Weight (Da) | IPI Number    | Total Sequence Coverage (%) | Total Unique Peptides |
|--------------------------------------------------------------------------------------|-----------------------|---------------|-----------------------------|-----------------------|
| RWD domain containing protein 1                                                      | 27922                 | IPI00034010.3 | 8.642                       | 2                     |
| S100 calcium-binding protein A13                                                     | 11464                 | IPI00016179.1 | 22.449                      | 3                     |
| S100 calcium-binding protein A16                                                     | 11794                 | IPI00062120.1 | 46.602                      | 5                     |
| Sad1/unc-84-like protein 2                                                           | 80262                 | IPI00295940.3 | 23.849                      | 11                    |
| S-adenosylmethionine synthetase gamma form                                           | 43633                 | IPI00010157.1 | 22.278                      | 8                     |
| SAM domain and HD domain-containing protein 1                                        | 72155                 | IPI00294739.1 | 15.974                      | 7                     |
| SAM50-like protein CGI-51                                                            | 51929                 | IPI00412713.3 | 14.072                      | 3                     |
| Sarcoma antigen NY-SAR-77                                                            | 33159                 | IPI00384438.1 | 10.884                      | 3                     |
| Sarcosine dehydrogenase, mitochondrial precursor                                     | 100973                | IPI00034308.2 | 11.983                      | 9                     |
| SART-1                                                                               | 90647                 | IPI00021417.2 | 7.453                       | 4                     |
| Scaffold attachment factor B                                                         | 102578                | IPI00300631.1 | 11.366                      | 8                     |
| SCAMP3 protein                                                                       | 38218                 | IPI00453116.3 | 34.006                      | 8                     |
| Scavenger mRNA decapping enzyme DcpS                                                 | 38657                 | IPI00335385.3 | 22.552                      | 5                     |
| SCO1 protein homolog, mitochondrial precursor                                        | 33793                 | IPI00027233.3 | 11.96                       | 2                     |
| SDAD1 protein                                                                        | 66883                 | IPI00411802.2 | 5.009                       | 2                     |
| SDHA protein                                                                         | 56599                 | IPI00217143.1 | 2.505                       | 2                     |
| SDSL protein                                                                         | 34652                 | IPI00062419.1 | 20.973                      | 5                     |
| Sec1 family domain containing protein 1                                              | 72334                 | IPI00165261.4 | 26.168                      | 12                    |
| Sec13-like protein                                                                   | 39653                 | IPI00185533.6 | 8.611                       | 2                     |
| Sec24-related protein D                                                              | 113007                | IPI00218288.5 | 6.873                       | 5                     |
| SEC31L1 protein                                                                      | 121575                | IPI00305152.5 | 31.646                      | 35                    |
| Secernin 1                                                                           | 46353                 | IPI00289862.3 | 25.604                      | 9                     |
| Secernin 2                                                                           | 46535                 | IPI00062266.2 | 9.647                       | 2                     |
| Secernin 3                                                                           | 48513                 | IPI00002311.2 | 10.849                      | 2                     |
| Secretagogin                                                                         | 32019                 | IPI00008730.2 | 81.159                      | 28                    |
| Secretogranin-1 precursor                                                            | 78199                 | IPI00006601.3 | 62.482                      | 60                    |
| Secretogranin-2 precursor                                                            | 70825                 | IPI00009362.1 | 62.885                      | 48                    |
| Secretogranin-3 precursor                                                            | 52973                 | IPI00292071.6 | 60.897                      | 32                    |
| Secretory carrier-associated membrane protein 1                                      | 37909                 | IPI00005129.6 | 26.627                      | 8                     |
| Secretory carrier-associated membrane protein 2                                      | 36625                 | IPI00218850.5 | 14.286                      | 4                     |
| Secretory pathway Ca <sup>2+</sup> /Mn <sup>2+</sup> transport ATPase SPCA1d protein | 103965                | IPI00024344.2 | 4.215                       | 3                     |
| Sel-1 homolog precursor                                                              | 88667                 | IPI00002790.2 | 17.003                      | 7                     |
| Selenide, water dikinase 1                                                           | 42883                 | IPI00029056.2 | 12.5                        | 3                     |
| Selenide, water dikinase 2                                                           | 47228                 | IPI00016906.1 | 15.848                      | 3                     |
| Selenium binding protein 1                                                           | 52358                 | IPI00305719.7 | 48.941                      | 15                    |
| Selenocysteine lyase                                                                 | 48149                 | IPI00101652.3 | 28.989                      | 9                     |
| Selenocysteine-specific elongation factor                                            | 65296                 | IPI00028050.1 | 3.691                       | 2                     |



| Protein Description                                                                 | Molecular Weight (Da) | IPI Number    | Total Sequence Coverage (%) | Total Unique Peptides |
|-------------------------------------------------------------------------------------|-----------------------|---------------|-----------------------------|-----------------------|
| Selenoprotein H                                                                     | 13398                 | IPI00218054.1 | 23.77                       | 2                     |
| Senescence marker protein-30                                                        | 33231                 | IPI00017551.1 | 14.381                      | 3                     |
| Sepiapterin reductase                                                               | 28031                 | IPI00017469.1 | 45.594                      | 9                     |
| Septin 11                                                                           | 49367                 | IPI00019376.4 | 29.138                      | 12                    |
| Septin 2                                                                            | 41461                 | IPI00014177.1 | 59.834                      | 14                    |
| Septin 5                                                                            | 42750                 | IPI00017731.1 | 16.802                      | 3                     |
| Septin 7                                                                            | 48756                 | IPI00033025.6 | 44.019                      | 15                    |
| Serine hydroxymethyltransferase, mitochondrial precursor                            | 55958                 | IPI00002520.1 | 46.429                      | 17                    |
| Serine palmitoyltransferase 1                                                       | 52710                 | IPI00005745.1 | 5.92                        | 2                     |
| Serine protease 23 precursor                                                        | 42974                 | IPI00026941.1 | 17.232                      | 3                     |
| Serine protease HTRA1 precursor                                                     | 51255                 | IPI00003176.1 | 14.583                      | 4                     |
| Serine/arginine repetitive matrix 1                                                 | 103329                | IPI00328293.2 | 11.501                      | 7                     |
| Serine/threonine protein phosphatase 2A, 55 kDa regulatory subunit B, alpha isoform | 51659                 | IPI00332511.5 | 15.436                      | 5                     |
| Serine/threonine protein phosphatase 2A, 65 kDa regulatory subunit A, alpha isoform | 65051                 | IPI00554737.1 | 26.701                      | 15                    |
| Serine/threonine protein phosphatase 2A, 65 kDa regulatory subunit A, beta isoform  | 66159                 | IPI00294178.1 | 8.486                       | 4                     |
| Serine/threonine protein phosphatase 2A, catalytic subunit, alpha isoform           | 35571                 | IPI00008380.1 | 25.89                       | 5                     |
| Serine/threonine protein phosphatase 2B catalytic subunit, alpha isoform            | 58650                 | IPI00179415.4 | 11.708                      | 5                     |
| Serine/threonine protein phosphatase 5                                              | 56842                 | IPI00019812.1 | 9.82                        | 5                     |
| Serine/threonine protein phosphatase PP1-beta catalytic subunit                     | 37163                 | IPI00218236.4 | 11.621                      | 3                     |
| Serine/threonine-protein kinase 3                                                   | 56265                 | IPI00411984.4 | 10.998                      | 3                     |
| Serine/threonine-protein kinase 4                                                   | 55595                 | IPI00011488.1 | 9.446                       | 3                     |
| Serine/threonine-protein kinase Nek9                                                | 107081                | IPI00301609.5 | 5.822                       | 4                     |
| Serine/threonine-protein kinase PAK 1                                               | 60623                 | IPI00011915.1 | 5.321                       | 3                     |
| Serine/threonine-protein kinase PAK 2                                               | 57968                 | IPI00219447.6 | 24.809                      | 5                     |
| Serine/threonine-protein kinase PRP4 homolog                                        | 116902                | IPI00013721.2 | 5.362                       | 5                     |
| Serine-threonine kinase receptor-associated protein                                 | 38414                 | IPI00294536.1 | 29.714                      | 9                     |
| Serum albumin precursor                                                             | 69321                 | IPI00022434.1 | 77.011                      | 48                    |
| Serum amyloid A2                                                                    | 13500                 | IPI00006146.3 | 22.951                      | 2                     |
| Serum amyloid P-component precursor                                                 | 25371                 | IPI00022391.1 | 11.659                      | 2                     |
| Seryl-tRNA synthetase                                                               | 58609                 | IPI00220637.4 | 41.131                      | 19                    |
| Seryl-tRNA synthetase, mitochondrial precursor                                      | 58246                 | IPI00328361.3 | 21.042                      | 6                     |
| SH3 domain-binding glutamic acid-rich-like protein                                  | 12766                 | IPI00025318.1 | 53.509                      | 11                    |
| SH3 domain-binding protein SNP70                                                    | 69954                 | IPI00170786.1 | 10.452                      | 6                     |
| SH3-containing GRB2-like protein 2                                                  | 39937                 | IPI00019171.1 | 13.352                      | 3                     |

| Protein Description                                                                           | Molecular Weight (Da) | IPI Number    | Total Sequence Coverage (%) | Total Unique Peptides |
|-----------------------------------------------------------------------------------------------|-----------------------|---------------|-----------------------------|-----------------------|
| SH3-domain GRB2-like 1                                                                        | 41464                 | IPI00019169.2 | 10.326                      | 3                     |
| Short chain 3-hydroxyacyl-CoA dehydrogenase, mitochondrial precursor                          | 34256                 | IPI00294398.1 | 89.172                      | 39                    |
| Short heat shock protein 60 Hsp60s1                                                           | 23616                 | IPI00329351.4 | 31.364                      | 11                    |
| Shwachman-Bodian-Diamond syndrome protein                                                     | 28745                 | IPI00427330.1 | 16                          | 3                     |
| Sialic acid synthase                                                                          | 40281                 | IPI00147874.1 | 44.568                      | 9                     |
| Sialic acid-specific acetyltransferase II                                                     | 58277                 | IPI00010949.3 | 7.648                       | 4                     |
| Sialidase 1 precursor                                                                         | 45439                 | IPI00029817.1 | 5.06                        | 2                     |
| Sideroflexin 1                                                                                | 35596                 | IPI00009368.2 | 39.441                      | 10                    |
| Signal recognition particle 14 kDa protein                                                    | 14535                 | IPI00293434.1 | 57.353                      | 6                     |
| Signal recognition particle 19 kDa protein                                                    | 16175                 | IPI00295889.1 | 43.056                      | 5                     |
| Signal recognition particle 54 kDa protein                                                    | 55668                 | IPI00009822.1 | 31.151                      | 11                    |
| Signal recognition particle 72 kDa protein                                                    | 74429                 | IPI00215888.3 | 44.776                      | 19                    |
| Signal recognition particle 9 kDa protein                                                     | 9974                  | IPI00216125.3 | 37.647                      | 3                     |
| Signal recognition particle receptor alpha subunit                                            | 69767                 | IPI00385267.2 | 27.273                      | 10                    |
| Signal recognition particle receptor beta subunit                                             | 29684                 | IPI00295098.3 | 27.675                      | 7                     |
| Signal transducer and activator of transcription 5A                                           | 90590                 | IPI00030783.1 | 3.778                       | 3                     |
| Signal-induced proliferation-associated 1 like 1                                              | 199904                | IPI00413362.1 | 2.827                       | 4                     |
| Similar to [3-methyl-2-oxobutanoate dehydrogenase [lipamide]] kinase, mitochondrial precursor | 43011                 | IPI00062344.2 | 24.607                      | 5                     |
| Similar to 6-phosphofructokinase, liver type                                                  | 90520                 | IPI00220617.3 | 17.952                      | 11                    |
| Similar to Acetyl-coenzyme A synthetase, cytoplasmic                                          | 78687                 | IPI00329773.4 | 12.518                      | 5                     |
| Similar to Acyl-CoA dehydrogenase family protein                                              | 125740                | IPI00418639.2 | 4.61                        | 2                     |
| Similar to Aldo-keto reductase family 1 member C2                                             | 37109                 | IPI00005668.3 | 49.235                      | 11                    |
| Similar to Arg/Abl-interacting protein ArgBP2b                                                | 78406                 | IPI00061793.2 | 34.184                      | 20                    |
| Similar to Calcium-dependent protease, small subunit                                          | 33765                 | IPI00025084.2 | 30.435                      | 3                     |
| Similar to Cold-inducible RNA-binding protein                                                 | 32026                 | IPI00180954.3 | 22.148                      | 5                     |
| Similar to CR6 interacting factor 1                                                           | 25551                 | IPI00290398.2 | 11.607                      | 2                     |
| Similar to Creatine kinase, ubiquitous mitochondrial precursor                                | 47234                 | IPI00024638.2 | 54.893                      | 20                    |
| Similar to Double-strand break repair protein MRE11A                                          | 81020                 | IPI00029159.3 | 20.534                      | 11                    |
| Similar to Endoplasmic reticulum mannosyl-oligosaccharide 1,2-alpha-mannosidase               | 41650                 | IPI00008207.5 | 10.215                      | 2                     |
| Similar to F13E7.4 protein                                                                    | 19282                 | IPI00032903.2 | 26.667                      | 2                     |
| Similar to Guanine nucleotide exchange factor p115-RhoGEF                                     | 106856                | IPI00166711.2 | 2.824                       | 2                     |
| Similar to Kinesin-like protein GAKIN                                                         | 195443                | IPI00478233.1 | 13.053                      | 15                    |
| Similar to mouse 2610034B18Rik protein                                                        | 24927                 | IPI00074225.6 | 21.239                      | 3                     |
| Similar to NPL4                                                                               | 73741                 | IPI00001676.5 | 19.091                      | 8                     |
| Similar to Nucleotide binding protein 2                                                       | 30387                 | IPI00001919.2 | 25.874                      | 4                     |

| Protein Description                                                | Molecular Weight (Da) | IPI Number    | Total Sequence Coverage (%) | Total Unique Peptides |
|--------------------------------------------------------------------|-----------------------|---------------|-----------------------------|-----------------------|
| Similar to Putative 42-9-9 protein                                 | 14480                 | IPI00013760.2 | 37.984                      | 5                     |
| Similar to Putative acyl-CoA thioester hydrolase CGI-16            | 49870                 | IPI00220710.5 | 18.223                      | 5                     |
| Similar to RIKEN cDNA 1110033O09 gene                              | 15723                 | IPI00394782.3 | 42.143                      | 6                     |
| Similar to Smooth muscle myosin heavy chain isoform SM1A           | 159634                | IPI00395772.3 | 65.195                      | 119                   |
| Similar to Synaptic glycoprotein SC2                               | 37443                 | IPI00100656.2 | 15.48                       | 4                     |
| Similar to Syndesmos                                               | 22379                 | IPI00411732.3 | 15.534                      | 2                     |
| Similar to Tubulin beta-4 chain                                    | 49953                 | IPI00034283.2 | 46.532                      | 14                    |
| Similar to VPS28 protein homolog                                   | 25819                 | IPI00007155.2 | 8.036                       | 2                     |
| Sin3 associated polypeptide p18                                    | 17550                 | IPI00011698.1 | 37.908                      | 6                     |
| Single-stranded DNA-binding protein, mitochondrial precursor       | 17249                 | IPI00029744.1 | 61.486                      | 10                    |
| SKD1 protein                                                       | 49271                 | IPI00182728.2 | 24.55                       | 7                     |
| SKD2 protein                                                       | 48638                 | IPI00411356.2 | 17.62                       | 6                     |
| SLIT-ROBO Rho GTPase activating protein 2                          | 120805                | IPI00479125.3 | 2.054                       | 2                     |
| Small acidic protein                                               | 20320                 | IPI00003419.1 | 29.508                      | 3                     |
| Small EDRK-rich factor 2                                           | 6896                  | IPI00024781.1 | 16.949                      | 2                     |
| Small glutamine-rich tetratricopeptide repeat-containing protein A | 34042                 | IPI00013949.1 | 10.543                      | 3                     |
| Small nuclear ribonucleoprotein E                                  | 10797                 | IPI00029266.1 | 29.348                      | 3                     |
| Small nuclear ribonucleoprotein G                                  | 8490                  | IPI00016572.1 | 26.316                      | 3                     |
| Small nuclear ribonucleoprotein polypeptide C                      | 19673                 | IPI00013396.2 | 21.667                      | 2                     |
| Small nuclear ribonucleoprotein Sm D1                              | 13273                 | IPI00302850.4 | 51.261                      | 5                     |
| Small nuclear ribonucleoprotein Sm D2                              | 13518                 | IPI00017963.1 | 38.136                      | 4                     |
| Small nuclear ribonucleoprotein Sm D3                              | 13907                 | IPI00017964.1 | 16.667                      | 2                     |
| SMAP1 protein                                                      | 50394                 | IPI00102096.2 | 8.351                       | 3                     |
| SMAP-1b                                                            | 103011                | IPI00072534.1 | 4.661                       | 3                     |
| S-methyl-5-thioadenosine phosphorylase                             | 31230                 | IPI00011876.1 | 16.961                      | 4                     |
| Smooth muScl and non-muScl myoSin alkali light chain isoform 1     | 16919                 | IPI00335168.8 | 59.603                      | 11                    |
| SMU1 protein                                                       | 57507                 | IPI00305833.3 | 6.433                       | 3                     |
| SNARE protein Ykt6                                                 | 22403                 | IPI00008569.1 | 11.616                      | 2                     |
| SNARE-associated protein Snapin                                    | 14865                 | IPI00018331.3 | 29.412                      | 2                     |
| SNF7 domain containing protein 2                                   | 24555                 | IPI00100796.4 | 27.854                      | 4                     |
| Sodium bicarbonate cotransporter NBC1                              | 112200                | IPI00016949.1 | 10.251                      | 5                     |
| Sodium/potassium-transporting ATPase alpha-3 chain                 | 111663                | IPI00302840.1 | 16.091                      | 16                    |
| Solute carrier family 2, facilitated glucose transporter, member 1 | 54083                 | IPI00220194.5 | 5.894                       | 3                     |
| Solute carrier family 25 member 24, isoform 1                      | 53304                 | IPI00337494.6 | 24.528                      | 10                    |
| Somatostatin precursor                                             | 12727                 | IPI00000130.3 | 54.31                       | 13                    |
| Sorbitol dehydrogenase                                             | 38141                 | IPI00216057.4 | 24.719                      | 6                     |
| Sorcin                                                             | 21662                 | IPI00027175.1 | 31.818                      | 6                     |

| Protein Description                                                                           | Molecular Weight (Da) | IPI Number    | Total Sequence Coverage (%) | Total Unique Peptides |
|-----------------------------------------------------------------------------------------------|-----------------------|---------------|-----------------------------|-----------------------|
| Sortilin-related receptor precursor                                                           | 248282                | IPI00022608.1 | 0.949                       | 2                     |
| Sorting nexin 1 iSoform c                                                                     | 53271                 | IPI00183274.2 | 23.629                      | 10                    |
| Sorting nexin 2                                                                               | 58499                 | IPI00299095.1 | 29.865                      | 11                    |
| Sorting nexin 3 iSoform a                                                                     | 18751                 | IPI00029740.1 | 28.395                      | 5                     |
| Sorting nexin 4                                                                               | 51876                 | IPI00029403.1 | 10                          | 4                     |
| Sorting nexin 5                                                                               | 46787                 | IPI00295209.5 | 17.327                      | 5                     |
| Sorting nexin 6                                                                               | 46620                 | IPI00298111.5 | 33.251                      | 13                    |
| Sorting nexin 9                                                                               | 66550                 | IPI00001883.1 | 16.807                      | 6                     |
| Sorting nexin family member 27                                                                | 61226                 | IPI00328097.2 | 17.375                      | 5                     |
| SOUL protein                                                                                  | 22861                 | IPI00003799.1 | 19.512                      | 3                     |
| Source of immunodominant MHC-associated peptides                                              | 93614                 | IPI00152377.1 | 4.116                       | 3                     |
| Specifically androgen-regulated protein                                                       | 63925                 | IPI00028392.2 | 19.634                      | 7                     |
| Spectrin, beta, erythrocytic (includeS SpherocytoSiS, clinical type I)                        | 246171                | IPI00216513.2 | 2.667                       | 4                     |
| Sperm membrane protein BS-63                                                                  | 198617                | IPI00293568.1 | 2.266                       | 3                     |
| Spermatogenesis associated factor                                                             | 97858                 | IPI00329583.4 | 3.471                       | 2                     |
| Spermine synthase                                                                             | 41242                 | IPI00005102.3 | 36.885                      | 6                     |
| S-phase kinase-associated protein 1A isoform b                                                | 18646                 | IPI00301364.2 | 51.534                      | 8                     |
| Sphingosine-1-phosphate lyase 1                                                               | 63483                 | IPI00099463.2 | 7.042                       | 3                     |
| Splice Isoform 1 of 26S protease regulatory subunit 6B                                        | 47337                 | IPI00020042.2 | 58.612                      | 21                    |
| Splice Isoform 1 of 26S proteasome non-ATPase regulatory subunit 1                            | 105769                | IPI00299608.3 | 22.246                      | 11                    |
| Splice Isoform 1 of 28S ribosomal protein S11, mitochondrial precursor                        | 20603                 | IPI00010244.4 | 12.371                      | 3                     |
| Splice Isoform 1 of 3'                                                                        | 33371                 | IPI00410214.1 | 31.169                      | 8                     |
| Splice Isoform 1 of 3,2-trans-enoyl-CoA isomerase, mitochondrial precursor                    | 32795                 | IPI00300567.1 | 16.887                      | 5                     |
| Splice Isoform 1 of 3-hydroxyacyl-CoA dehydrogenase type II                                   | 26906                 | IPI00017726.1 | 78.544                      | 14                    |
| Splice Isoform 1 of 40S ribosomal protein S24                                                 | 15413                 | IPI00029750.1 | 48.872                      | 9                     |
| Splice Isoform 1 of 5'                                                                        | 23368                 | IPI00005573.3 | 32.836                      | 5                     |
| Splice Isoform 1 of Abl-interactor 1                                                          | 55047                 | IPI00431025.1 | 8.465                       | 5                     |
| Splice Isoform 1 of Abl-interactor 2                                                          | 55629                 | IPI00442210.1 | 3.704                       | 2                     |
| Splice Isoform 1 of Acetyl-coenzyme A synthetase 2-like, mitochondrial precursor              | 74809                 | IPI00216932.2 | 6.096                       | 2                     |
| Splice Isoform 1 of Actin-binding LIM protein 1                                               | 87588                 | IPI00329495.3 | 21.337                      | 10                    |
| Splice Isoform 1 of Actin-like protein 6A                                                     | 47430                 | IPI00003627.1 | 7.459                       | 2                     |
| Splice Isoform 1 of Acyl-CoA dehydrogenase, very-long-chain specific, mitochondrial precursor | 70345                 | IPI00028031.1 | 52.519                      | 38                    |
| Splice Isoform 1 of Acyl-protein thioesterase 1                                               | 24653                 | IPI00007321.1 | 26.087                      | 3                     |
| Splice Isoform 1 of Adapter-related protein complex 3 beta 1 subunit                          | 121274                | IPI00021129.4 | 11.609                      | 9                     |
| Splice Isoform 1 of Adapter-related protein complex 3 delta 1 subunit                         | 130390                | IPI00411453.2 | 13.16                       | 10                    |

| Protein Description                                                                 | Molecular Weight (Da) | IPI Number    | Total Sequence Coverage (%) | Total Unique Peptides |
|-------------------------------------------------------------------------------------|-----------------------|---------------|-----------------------------|-----------------------|
| Splice Isoform 1 of Adaptor-related protein complex 1, mu 2 subunit                 | 48078                 | IPI00002552.1 | 9.929                       | 2                     |
| Splice Isoform 1 of Adenylosuccinate lyase                                          | 54854                 | IPI00026904.1 | 6.198                       | 2                     |
| Splice Isoform 1 of ADP-ribose pyrophosphatase, mitochondrial precursor             | 39101                 | IPI00031558.3 | 25.429                      | 9                     |
| Splice Isoform 1 of ADP-ribosylation factor GTPase activating protein 1             | 44640                 | IPI00175169.3 | 14.778                      | 4                     |
| Splice Isoform 1 of A-kinase anchor protein 9                                       | 453387                | IPI00019223.3 | 5.446                       | 14                    |
| Splice Isoform 1 of Alpha adducin                                                   | 80905                 | IPI00019901.1 | 11.94                       | 6                     |
| Splice Isoform 1 of Alpha-1,3-mannosyltransferase ALG2                              | 47061                 | IPI00386072.3 | 13.221                      | 2                     |
| Splice Isoform 1 of Alpha-parvin                                                    | 42217                 | IPI00018963.3 | 7.527                       | 2                     |
| Splice Isoform 1 of Alpha-synuclein                                                 | 14451                 | IPI00024107.1 | 18.571                      | 2                     |
| Splice Isoform 1 of Alpha-tryptase precursor                                        | 30753                 | IPI00010274.6 | 16.364                      | 4                     |
| Splice Isoform 1 of Amyloid-like protein 2 precursor                                | 86900                 | IPI00031030.1 | 5.767                       | 3                     |
| Splice Isoform 1 of Annexin A7                                                      | 52706                 | IPI00002460.2 | 28.279                      | 13                    |
| Splice Isoform 1 of Apoptosis-associated speck-like protein containing a CARD       | 21613                 | IPI00001699.1 | 16.923                      | 3                     |
| Splice Isoform 1 of Apoptotic chromatin condensation inducer in the nucleus         | 151797                | IPI00007334.1 | 17.748                      | 17                    |
| Splice Isoform 1 of ARF GTPase-activating protein GIT1                              | 84289                 | IPI00409562.1 | 3.679                       | 2                     |
| Splice Isoform 1 of Arginine/serine-rich splicing factor 10                         | 33646                 | IPI00301503.8 | 12.847                      | 2                     |
| Splice Isoform 1 of Ataxin-2                                                        | 140054                | IPI00180154.1 | 2.515                       | 2                     |
| Splice Isoform 1 of Ataxin-2-like protein                                           | 113304                | IPI00456359.1 | 13.023                      | 6                     |
| Splice Isoform 1 of Autophagy protein 3-like                                        | 35841                 | IPI00022254.4 | 14.968                      | 5                     |
| Splice Isoform 1 of B aggressive lymphoma protein                                   | 96281                 | IPI00027803.2 | 8.08                        | 3                     |
| Splice Isoform 1 of Bcl-2-associated transcription factor 1                         | 106059                | IPI00006079.1 | 16.087                      | 13                    |
| Splice Isoform 1 of Beta-1-syntrophin                                               | 58025                 | IPI00026059.1 | 6.32                        | 2                     |
| Splice Isoform 1 of Beta-2-syntrophin                                               | 57913                 | IPI00009505.1 | 4.259                       | 2                     |
| Splice Isoform 1 of Beta-catenin                                                    | 85442                 | IPI00017292.1 | 34.955                      | 17                    |
| Splice Isoform 1 of BolA-like protein My016                                         | 10110                 | IPI00301434.3 | 51.163                      | 3                     |
| Splice Isoform 1 of Bromodomain adjacent to zinc finger domain protein 1B           | 170796                | IPI00069817.2 | 3.978                       | 4                     |
| Splice Isoform 1 of Calcyclin-binding protein                                       | 26194                 | IPI00395627.3 | 48.684                      | 7                     |
| Splice Isoform 1 of Caldesmon                                                       | 93194                 | IPI00014516.1 | 33.291                      | 25                    |
| Splice Isoform 1 of Calumenin precursor                                             | 37084                 | IPI00014537.1 | 45.397                      | 10                    |
| Splice Isoform 1 of Carnitine O-acetyltransferase                                   | 70880                 | IPI00016457.4 | 6.55                        | 3                     |
| Splice Isoform 1 of Carnitine O-palmitoyltransferase I, mitochondrial liver isoform | 88311                 | IPI00032038.4 | 6.339                       | 4                     |
| Splice Isoform 1 of CCG1-interacting factor B                                       | 22332                 | IPI00063827.1 | 24.286                      | 4                     |
| Splice Isoform 1 of CCR4-NOT transcription complex subunit 2                        | 59700                 | IPI00005011.1 | 9.074                       | 2                     |
| Splice Isoform 1 of CCR4-NOT transcription complex subunit 3                        | 81822                 | IPI00005015.1 | 3.187                       | 2                     |
| Splice Isoform 1 of CDK5 regulatory subunit-associated protein 3                    | 57043                 | IPI00414442.1 | 14.961                      | 6                     |
| Splice Isoform 1 of Chromodomain helicase-DNA-binding protein 4                     | 217853                | IPI00000846.1 | 5.805                       | 6                     |
| Splice Isoform 1 of Complement factor B precursor                                   | 85479                 | IPI00019591.1 | 16.754                      | 9                     |

| Protein Description                                                                                   | Molecular Weight (Da) | IPI Number    | Total Sequence Coverage (%) | Total Unique Peptides |
|-------------------------------------------------------------------------------------------------------|-----------------------|---------------|-----------------------------|-----------------------|
| Splice Isoform 1 of Conserved oligomeric Golgi complex component 4                                    | 89038                 | IPI00149849.4 | 4.204                       | 2                     |
| Splice Isoform 1 of COP9 signalosome complex subunit 2                                                | 51896                 | IPI00018813.3 | 24.664                      | 9                     |
| Splice Isoform 1 of CUG triplet repeat RNA-binding protein 1                                          | 52030                 | IPI00034015.1 | 11.934                      | 3                     |
| Splice Isoform 1 of Cullin homolog 1                                                                  | 89622                 | IPI00014310.1 | 10.954                      | 5                     |
| Splice Isoform 1 of Cullin homolog 3                                                                  | 88873                 | IPI00014312.1 | 19.401                      | 10                    |
| Splice Isoform 1 of Cullin homolog 4B                                                                 | 102897                | IPI00179057.5 | 14.572                      | 9                     |
| Splice Isoform 1 of Dehydrogenase/reductase SDR family member 7 precursor                             | 38274                 | IPI00006957.3 | 20.354                      | 6                     |
| Splice Isoform 1 of Deoxyguanosine kinase, mitochondrial precursor                                    | 32036                 | IPI00004461.2 | 16.606                      | 2                     |
| Splice Isoform 1 of Diablo homolog, mitochondrial precursor                                           | 27114                 | IPI00008418.3 | 25.523                      | 5                     |
| Splice Isoform 1 of Dipeptidyl-peptidase III                                                          | 82538                 | IPI00552114.1 | 25.509                      | 11                    |
| Splice Isoform 1 of Disabled homolog 2                                                                | 82456                 | IPI00179438.4 | 2.857                       | 2                     |
| Splice Isoform 1 of DNA repair protein RAD50                                                          | 153797                | IPI00305282.2 | 22.18                       | 18                    |
| Splice Isoform 1 of DNA-dependent protein kinase catalytic subunit                                    | 468788                | IPI00296337.2 | 13.784                      | 41                    |
| Splice Isoform 1 of Double-stranded RNA-specific adenosine deaminase                                  | 135910                | IPI00394665.3 | 17.863                      | 16                    |
| Splice Isoform 1 of Drebrin-like protein                                                              | 48178                 | IPI00456925.3 | 35.814                      | 13                    |
| Splice Isoform 1 of Dual specificity mitogen-activated protein kinase kinase 3                        | 36149                 | IPI00218857.1 | 10.063                      | 2                     |
| Splice Isoform 1 of Dynamin 2                                                                         | 98003                 | IPI00033022.2 | 19.77                       | 13                    |
| Splice Isoform 1 of Dynein intermediate chain 1, cytosolic                                            | 72910                 | IPI00022461.1 | 9.302                       | 3                     |
| Splice Isoform 1 of Dystrobrevin alpha                                                                | 83881                 | IPI00000845.1 | 14.401                      | 7                     |
| Splice Isoform 1 of Ectonucleotide pyrophosphatase/phosphodiesterase 2                                | 98940                 | IPI00156171.2 | 6.837                       | 6                     |
| Splice Isoform 1 of EGF-like repeats and discoidin I-like domains protein 3 precursor                 | 53730                 | IPI00306046.1 | 8.958                       | 3                     |
| Splice Isoform 1 of Egl nine homolog 1                                                                | 45992                 | IPI00004928.1 | 13.85                       | 3                     |
| Splice Isoform 1 of Electron transfer flavoprotein-ubiquinone oxidoreductase, mitochondrial precursor | 68464                 | IPI00032875.1 | 20.097                      | 9                     |
| Splice Isoform 1 of Elongation factor G 2, mitochondrial precursor                                    | 86546                 | IPI00071703.1 | 10.27                       | 5                     |
| Splice Isoform 1 of Elongation factor Ts, mitochondrial precursor                                     | 35368                 | IPI00021016.3 | 36.923                      | 6                     |
| Splice Isoform 1 of Enabled protein homolog                                                           | 66470                 | IPI00411623.3 | 12.352                      | 5                     |
| Splice Isoform 1 of EPM2A-interacting protein 1                                                       | 70325                 | IPI00419721.1 | 14.333                      | 5                     |
| Splice Isoform 1 of Epsin 1                                                                           | 57539                 | IPI00002495.1 | 26.316                      | 8                     |
| Splice Isoform 1 of ER-Golgi intermediate compartment 32 kDa protein                                  | 32571                 | IPI00022887.4 | 24.483                      | 5                     |
| Splice Isoform 1 of Eukaryotic initiation factor 4A-II                                                | 46373                 | IPI00328328.3 | 25.799                      | 9                     |
| Splice Isoform 1 of Eukaryotic translation initiation factor 4 gamma 3                                | 176542                | IPI00328268.7 | 6.183                       | 7                     |
| Splice Isoform 1 of Exocyst complex component Sec3                                                    | 101917                | IPI00019427.2 | 11.857                      | 7                     |
| Splice Isoform 1 of Exocyst complex component Sec6                                                    | 86790                 | IPI00157734.2 | 14.021                      | 4                     |
| Splice Isoform 1 of Extracellular calcium-sensing receptor precursor                                  | 120597                | IPI00012817.1 | 4.453                       | 3                     |
| Splice Isoform 1 of Far upstream element binding protein 3                                            | 61602                 | IPI00377261.1 | 19.231                      | 7                     |

| Protein Description                                                                    | Molecular Weight (Da) | IPI Number    | Total Sequence Coverage (%) | Total Unique Peptides |
|----------------------------------------------------------------------------------------|-----------------------|---------------|-----------------------------|-----------------------|
| Splice Isoform 1 of Fatty aldehyde dehydrogenase                                       | 54813                 | IPI00333619.4 | 17.732                      | 9                     |
| Splice Isoform 1 of Fibronectin precursor                                              | 262442                | IPI00022418.1 | 10.226                      | 14                    |
| Splice Isoform 1 of FK506-binding protein 7 precursor                                  | 29990                 | IPI00001914.1 | 11.583                      | 2                     |
| Splice Isoform 1 of Focal adhesion kinase 1                                            | 119157                | IPI00012885.1 | 6.179                       | 3                     |
| Splice Isoform 1 of Formin-binding protein 3                                           | 108737                | IPI00337385.1 | 4.807                       | 3                     |
| Splice Isoform 1 of FYVE, RhoGEF and PH domain containing protein 4                    | 86541                 | IPI00065435.1 | 7.18                        | 4                     |
| Splice Isoform 1 of Galectin-8                                                         | 35516                 | IPI00010844.1 | 14.241                      | 4                     |
| Splice Isoform 1 of Gamma-glutamyltransferase 4 precursor                              | 70793                 | IPI00030634.1 | 10.06                       | 3                     |
| Splice Isoform 1 of Gamma-glutamyltranspeptidase 1 precursor                           | 61344                 | IPI00018901.1 | 11.599                      | 5                     |
| Splice Isoform 1 of Gamma-tubulin complex component 2                                  | 102469                | IPI00029705.2 | 2.993                       | 2                     |
| Splice Isoform 1 of Ganglioside-induced differentiation-associated protein 1-like 1    | 41947                 | IPI00306658.1 | 10.082                      | 2                     |
| Splice Isoform 1 of GDP-fucose protein O-fucosyltransferase 1 precursor                | 43927                 | IPI00058192.1 | 28.351                      | 6                     |
| Splice Isoform 1 of General transcription factor II-I                                  | 112346                | IPI00054042.1 | 14.83                       | 10                    |
| Splice Isoform 1 of Ghrelin precursor                                                  | 12903                 | IPI00008925.3 | 33.333                      | 2                     |
| Splice Isoform 1 of Glucosamine--fructose-6-phosphate aminotransferase [isomerizing] 1 | 78756                 | IPI00217952.6 | 31.903                      | 19                    |
| Splice Isoform 1 of Glycerol kinase                                                    | 57452                 | IPI00027424.3 | 5.725                       | 2                     |
| Splice Isoform 1 of Glycogen synthase kinase-3 beta                                    | 46715                 | IPI00028570.2 | 12.143                      | 2                     |
| Splice Isoform 1 of Golgi autoantigen, golgin subfamily A member 2                     | 111590                | IPI00156651.1 | 11.212                      | 9                     |
| Splice Isoform 1 of Golgi autoantigen, golgin subfamily A member 3                     | 167252                | IPI00305267.2 | 8.144                       | 7                     |
| Splice Isoform 1 of Golgi autoantigen, golgin subfamily A member 4                     | 260980                | IPI00013272.1 | 14.753                      | 23                    |
| Splice Isoform 1 of Golgi autoantigen, golgin subfamily A member 5                     | 82940                 | IPI00294065.6 | 11.218                      | 6                     |
| Splice Isoform 1 of Heat shock cognate 71 kDa protein                                  | 70854                 | IPI00003865.1 | 49.226                      | 36                    |
| Splice Isoform 1 of Heterogeneous nuclear ribonucleoprotein A3                         | 39571                 | IPI00419373.1 | 45.503                      | 22                    |
| Splice Isoform 1 of Heterogeneous nuclear ribonucleoprotein D0                         | 38410                 | IPI00028888.1 | 43.099                      | 20                    |
| Splice Isoform 1 of Heterogeneous nuclear ribonucleoprotein H3                         | 36903                 | IPI00013877.2 | 39.884                      | 8                     |
| Splice Isoform 1 of Heterogeneous nuclear ribonucleoprotein K                          | 50944                 | IPI00216049.1 | 10.799                      | 3                     |
| Splice Isoform 1 of Heterogeneous nuclear ribonucleoprotein L-like                     | 60045                 | IPI00103247.1 | 9.41                        | 4                     |
| Splice Isoform 1 of Heterogeneous nuclear ribonucleoprotein Q                          | 69590                 | IPI00018140.2 | 38.523                      | 23                    |
| Splice Isoform 1 of Hexokinase, type I                                                 | 102437                | IPI00018246.3 | 11.778                      | 7                     |
| Splice Isoform 1 of Hook homolog 2                                                     | 83112                 | IPI00002432.1 | 19.611                      | 7                     |
| Splice Isoform 1 of Host cell factor                                                   | 208711                | IPI00019848.1 | 7.027                       | 10                    |
| Splice Isoform 1 of Importin 4                                                         | 118642                | IPI00156374.3 | 2.59                        | 2                     |
| Splice Isoform 1 of Importin-alpha re-exporter                                         | 110346                | IPI00022744.5 | 8.651                       | 5                     |
| Splice Isoform 1 of Inorganic pyrophosphatase 2, mitochondrial precursor               | 37938                 | IPI00301109.3 | 50.599                      | 14                    |
| Splice Isoform 1 of Interleukin enhancer-binding factor 3                              | 95325                 | IPI00298788.3 | 25.615                      | 18                    |
| Splice Isoform 1 of Kinectin                                                           | 156179                | IPI00328753.1 | 56.153                      | 67                    |

| Protein Description                                                                        | Molecular Weight (Da) | IPI Number     | Total Sequence Coverage (%) | Total Unique Peptides |
|--------------------------------------------------------------------------------------------|-----------------------|----------------|-----------------------------|-----------------------|
| Splice Isoform 1 of Kinesin family member 21A                                              | 187063                | IPI00425404.1  | 11.171                      | 10                    |
| Splice Isoform 1 of Leucine-rich repeat-containing protein 1                               | 59205                 | IPI00427739.1  | 7.824                       | 2                     |
| Splice Isoform 1 of Liprin-alpha 1                                                         | 135695                | IPI00163496.10 | 1.997                       | 2                     |
| Splice Isoform 1 of Long-chain-fatty-acid--CoA ligase 1                                    | 77893                 | IPI00012728.1  | 10.602                      | 5                     |
| Splice Isoform 1 of MAGUK p55 subfamily member 2                                           | 64545                 | IPI00217808.2  | 5.556                       | 2                     |
| Splice Isoform 1 of MAP kinase-activated protein kinase 2                                  | 45538                 | IPI00026054.1  | 10                          | 3                     |
| Splice Isoform 1 of MAP/microtubule affinity-regulating kinase 3                           | 86890                 | IPI00183118.4  | 4.381                       | 2                     |
| Splice Isoform 1 of Melanoma-associated antigen D2                                         | 64914                 | IPI00009542.1  | 8.746                       | 3                     |
| Splice Isoform 1 of Melanotransferrin precursor                                            | 80190                 | IPI00029275.1  | 3.252                       | 2                     |
| Splice Isoform 1 of Methyl-CpG-binding domain protein 3                                    | 32823                 | IPI00439194.1  | 12.027                      | 3                     |
| Splice Isoform 1 of Methylglutaconyl-CoA hydratase, mitochondrial precursor                | 35586                 | IPI00017802.1  | 8.26                        | 3                     |
| Splice Isoform 1 of Microtubule-associated protein 2                                       | 199417                | IPI00003842.2  | 10.071                      | 12                    |
| Splice Isoform 1 of Microtubule-associated protein 4                                       | 120944                | IPI00396171.3  | 54.427                      | 40                    |
| Splice Isoform 1 of Microtubule-associated protein RP/EB family member 2                   | 37008                 | IPI00003420.1  | 33.028                      | 10                    |
| Splice Isoform 1 of Microtubule-associated protein RP/EB family member 3                   | 31962                 | IPI00017597.3  | 27.046                      | 5                     |
| Splice Isoform 1 of Minor histocompatibility antigen H13                                   | 41462                 | IPI00152441.3  | 7.427                       | 3                     |
| Splice Isoform 1 of MIR-interacting saposin-like protein precursor                         | 20639                 | IPI00443909.1  | 67.033                      | 11                    |
| Splice Isoform 1 of Mitochondrial 28S ribosomal protein S5                                 | 47976                 | IPI00169400.1  | 5.581                       | 2                     |
| Splice Isoform 1 of Mitochondrial dicarboxylate carrier                                    | 31262                 | IPI00015920.2  | 12.195                      | 2                     |
| Splice Isoform 1 of Mitochondrial inner membrane protein                                   | 83626                 | IPI00009960.6  | 59.367                      | 46                    |
| Splice Isoform 1 of Mitogen-activated protein kinase kinase kinase kinase 3                | 101251                | IPI00217024.1  | 3.468                       | 2                     |
| Splice Isoform 1 of Mitogen-activated protein kinase kinase kinase kinase 4                | 142013                | IPI00006752.2  | 5.892                       | 4                     |
| Splice Isoform 1 of Mortality factor 4-like protein 1                                      | 41448                 | IPI00409675.1  | 9.392                       | 2                     |
| Splice Isoform 1 of Mps one binder kinase activator-like 1B                                | 25064                 | IPI00301518.1  | 12.037                      | 2                     |
| Splice Isoform 1 of Myoferlin                                                              | 234561                | IPI00021048.1  | 8.734                       | 13                    |
| Splice Isoform 1 of Myosin Ib                                                              | 131902                | IPI00376344.3  | 28.257                      | 24                    |
| Splice Isoform 1 of Myosin Id                                                              | 116129                | IPI00329719.1  | 20.577                      | 15                    |
| Splice Isoform 1 of Myosin Va                                                              | 215285                | IPI00000807.1  | 8.464                       | 9                     |
| Splice Isoform 1 of Myosin XVIIIa                                                          | 233402                | IPI00017030.10 | 8.362                       | 11                    |
| Splice Isoform 1 of N6-adenosine-methyltransferase 70 kDa subunit                          | 64433                 | IPI00009755.3  | 15.69                       | 5                     |
| Splice Isoform 1 of N-acylneuraminase cytidylyltransferase                                 | 48349                 | IPI00303158.3  | 6.221                       | 2                     |
| Splice Isoform 1 of NADH-ubiquinone oxidoreductase 51 kDa subunit, mitochondrial precursor | 50785                 | IPI00028520.2  | 22.845                      | 11                    |
| Splice Isoform 1 of Negative elongation factor A                                           | 59437                 | IPI00394676.1  | 9.29                        | 2                     |
| Splice Isoform 1 of Negative elongation factor E                                           | 43214                 | IPI00000858.1  | 8.158                       | 2                     |
| Splice Isoform 1 of Nesprin 2                                                              | 795885                | IPI00239405.3  | 4.343                       | 18                    |
| Splice Isoform 1 of Neurobeachin protein                                                   | 327604                | IPI00328195.4  | 2.817                       | 6                     |



| Protein Description                                                         | Molecular Weight (Da) | IPI Number    | Total Sequence Coverage (%) | Total Unique Peptides |
|-----------------------------------------------------------------------------|-----------------------|---------------|-----------------------------|-----------------------|
| Splice Isoform 1 of Neuroendocrine protein 7B2 precursor                    | 23715                 | IPI00008944.2 | 52.358                      | 12                    |
| Splice Isoform 1 of Neutral alpha-glucosidase AB precursor                  | 106807                | IPI00383581.1 | 50.212                      | 35                    |
| Splice Isoform 1 of Nicastrin precursor                                     | 78362                 | IPI00021983.1 | 11.707                      | 6                     |
| Splice Isoform 1 of NMDA receptor regulated 1-like protein                  | 101397                | IPI00167368.2 | 4.167                       | 2                     |
| Splice Isoform 1 of NMDA receptor regulated protein 1                       | 101208                | IPI00386189.2 | 9.815                       | 6                     |
| Splice Isoform 1 of NSFL1 cofactor p47                                      | 40548                 | IPI00100197.3 | 43.243                      | 12                    |
| Splice Isoform 1 of Nuclear autoantigenic sperm protein                     | 85186                 | IPI00179953.2 | 12.183                      | 8                     |
| Splice Isoform 1 of Nuclear factor NF-kappa-B p100/p49 subunits             | 96618                 | IPI00477537.1 | 19.689                      | 9                     |
| Splice Isoform 1 of Nuclear mitotic apparatus protein 1                     | 238130                | IPI00292771.3 | 18.014                      | 26                    |
| Splice Isoform 1 of Nuclear pore complex protein Nup98-Nup96 precursor      | 187673                | IPI00006038.4 | 5.437                       | 5                     |
| Splice Isoform 1 of Nucleolar protein 3                                     | 24313                 | IPI00105916.1 | 17.352                      | 2                     |
| Splice Isoform 1 of Nucleophosmin                                           | 32555                 | IPI00027499.1 | 73.129                      | 24                    |
| Splice Isoform 1 of Nucleoporin p54                                         | 55401                 | IPI00172580.3 | 12.032                      | 5                     |
| Splice Isoform 1 of Oligoribonuclease, mitochondrial precursor              | 26844                 | IPI00032830.1 | 21.097                      | 4                     |
| Splice Isoform 1 of Opioid growth factor receptor                           | 73294                 | IPI00021537.4 | 5.318                       | 2                     |
| Splice Isoform 1 of Optineurin                                              | 65881                 | IPI00304189.3 | 15.425                      | 8                     |
| Splice Isoform 1 of PDZ and LIM domain protein 4                            | 35376                 | IPI00032206.2 | 7.273                       | 2                     |
| Splice Isoform 1 of Peptidyl-prolyl cis-trans isomerase G                   | 88565                 | IPI00006298.1 | 5.57                        | 4                     |
| Splice Isoform 1 of Pescadillo homolog 1                                    | 67960                 | IPI00003768.1 | 3.741                       | 2                     |
| Splice Isoform 1 of Phosphatidylinositol 4-kinase beta                      | 91321                 | IPI00002591.3 | 3.431                       | 2                     |
| Splice Isoform 1 of Phosphatidylinositol-4-phosphate 5-kinase type II beta  | 47348                 | IPI00216470.1 | 11.538                      | 4                     |
| Splice Isoform 1 of Phosphofurin acidic cluster sorting protein 1           | 104833                | IPI00376229.1 | 7.061                       | 4                     |
| Splice Isoform 1 of Phosphoserine aminotransferase                          | 40397                 | IPI00001734.2 | 10.27                       | 3                     |
| Splice Isoform 1 of Plasminogen activator inhibitor 1 RNA-binding protein   | 44938                 | IPI00410693.3 | 50.98                       | 19                    |
| Splice Isoform 1 of Pleckstrin homology domain containing family C member 1 | 77811                 | IPI00000856.5 | 7.794                       | 2                     |
| Splice Isoform 1 of Plectin 1                                               | 531412                | IPI00014898.1 | 39.646                      | 161                   |
| Splice Isoform 1 of Pleiotropic regulator 1                                 | 57158                 | IPI00002624.1 | 12.451                      | 4                     |
| Splice Isoform 1 of Pogo transposable element with ZNF domain               | 155171                | IPI00410717.1 | 2.057                       | 2                     |
| Splice Isoform 1 of Poly                                                    | 35916                 | IPI00027970.4 | 15.044                      | 4                     |
| Splice Isoform 1 of Polyadenylate-binding protein 1                         | 70626                 | IPI00008524.1 | 28.459                      | 19                    |
| Splice Isoform 1 of Polymerase delta interacting protein 3                  | 46060                 | IPI00440688.3 | 17.577                      | 5                     |
| Splice Isoform 1 of Polymerase I and transcript release factor              | 43450                 | IPI00176903.2 | 28.974                      | 9                     |
| Splice Isoform 1 of Polypyrimidine tract-binding protein 1                  | 57186                 | IPI00179964.5 | 37.665                      | 19                    |
| Splice Isoform 1 of Porphobilinogen deaminase                               | 39306                 | IPI00028160.1 | 14.681                      | 3                     |
| Splice Isoform 1 of Potential helicase MOV-10                               | 113599                | IPI00444452.3 | 5.783                       | 4                     |
| Splice Isoform 1 of Presynaptic protein SAP97                               | 100293                | IPI00030351.1 | 6.637                       | 4                     |
| Splice Isoform 1 of Probable aminopeptidase NPEPL1                          | 43504                 | IPI00100292.5 | 12.409                      | 3                     |

| Protein Description                                                                           | Molecular Weight (Da) | IPI Number    | Total Sequence Coverage (%) | Total Unique Peptides |
|-----------------------------------------------------------------------------------------------|-----------------------|---------------|-----------------------------|-----------------------|
| Splice Isoform 1 of Probable mitochondrial import receptor subunit TOM40 homolog              | 37869                 | IPI00014053.3 | 11.911                      | 2                     |
| Splice Isoform 1 of Programmed cell death protein 8, mitochondrial precursor                  | 66859                 | IPI00000690.1 | 37.684                      | 17                    |
| Splice Isoform 1 of Proteasome activator complex subunit 3                                    | 29488                 | IPI00030243.1 | 16.142                      | 3                     |
| Splice Isoform 1 of Proteasome subunit alpha type 7                                           | 27870                 | IPI00024175.3 | 65.323                      | 14                    |
| Splice Isoform 1 of Proteasome subunit beta type 8 precursor                                  | 30335                 | IPI00000783.1 | 8.333                       | 2                     |
| Splice Isoform 1 of Protein 4.1                                                               | 96957                 | IPI00003921.1 | 5.556                       | 2                     |
| Splice Isoform 1 of Protein arginine N-methyltransferase 1                                    | 41459                 | IPI00018522.3 | 5.263                       | 2                     |
| Splice Isoform 1 of Protein C14orf127                                                         | 34048                 | IPI00384517.1 | 11.599                      | 2                     |
| Splice Isoform 1 of Protein C14orf133                                                         | 56970                 | IPI00004958.2 | 14.604                      | 4                     |
| Splice Isoform 1 of Protein C20orf116 precursor                                               | 35589                 | IPI00028387.3 | 38.854                      | 9                     |
| Splice Isoform 1 of Protein C20orf22                                                          | 45068                 | IPI00394779.1 | 14.573                      | 5                     |
| Splice Isoform 1 of Protein C8orf2                                                            | 37815                 | IPI00026942.3 | 23.009                      | 8                     |
| Splice Isoform 1 of Protein CXorf17                                                           | 120499                | IPI00394751.1 | 2.099                       | 2                     |
| Splice Isoform 1 of Protein D11Lgp1 homolog precursor                                         | 57487                 | IPI00427501.1 | 10.943                      | 2                     |
| Splice Isoform 1 of Protein HT031                                                             | 26380                 | IPI00300990.3 | 11.694                      | 2                     |
| Splice Isoform 1 of Protein KIAA1219                                                          | 166692                | IPI00409601.1 | 4.15                        | 3                     |
| Splice Isoform 1 of Protein kinase C and casein kinase substrate in neurons protein 2         | 55704                 | IPI00027009.2 | 33.745                      | 13                    |
| Splice Isoform 1 of Protein phosphatase 1 regulatory subunit 12A                              | 115211                | IPI00183002.6 | 16.019                      | 12                    |
| Splice Isoform 1 of Protein phosphatase methylesterase 1                                      | 42679                 | IPI00007694.3 | 22.108                      | 5                     |
| Splice Isoform 1 of Protein-glutamine gamma-glutamyltransferase                               | 77280                 | IPI00294578.1 | 37.118                      | 22                    |
| Splice Isoform 1 of Putative GTP-binding protein PTD004                                       | 44715                 | IPI00290416.3 | 43.687                      | 11                    |
| Splice Isoform 1 of Putative HIF-prolyl hydroxylase PH-4                                      | 56625                 | IPI00219456.5 | 5.378                       | 2                     |
| Splice Isoform 1 of Putative RNA-binding protein 15                                           | 107124                | IPI00102752.2 | 2.252                       | 2                     |
| Splice Isoform 1 of Putative splicing factor YT521                                            | 84649                 | IPI00144293.4 | 10.316                      | 6                     |
| Splice Isoform 1 of Pyridoxal kinase                                                          | 35080                 | IPI00013004.1 | 55.128                      | 13                    |
| Splice Isoform 1 of Pyruvate dehydrogenase E1 component beta subunit, mitochondrial precursor | 39194                 | IPI00003925.5 | 40.39                       | 12                    |
| Splice Isoform 1 of Quinone oxidoreductase-like 1                                             | 38638                 | IPI00438923.1 | 7.45                        | 2                     |
| Splice Isoform 1 of Rab GTPase binding effector protein 1                                     | 99305                 | IPI00293009.3 | 2.32                        | 2                     |
| Splice Isoform 1 of Rab GTPase binding effector protein 2                                     | 63504                 | IPI00412499.1 | 10.896                      | 5                     |
| Splice Isoform 1 of RAB6 interacting protein 2                                                | 128008                | IPI00216719.1 | 15.323                      | 10                    |
| Splice Isoform 1 of RAC-gamma serine/threonine-protein kinase                                 | 55739                 | IPI00031747.3 | 6.263                       | 2                     |
| Splice Isoform 1 of RaBP1 associated Eps domain containing protein 1                          | 80720                 | IPI00337530.3 | 9.274                       | 5                     |
| Splice Isoform 1 of Ran-binding protein 3                                                     | 60173                 | IPI00026337.1 | 10.229                      | 4                     |
| Splice Isoform 1 of Ras-related protein Rab-1A                                                | 22663                 | IPI00005719.1 | 37.561                      | 9                     |

| Protein Description                                                         | Molecular Weight (Da) | IPI Number    | Total Sequence Coverage (%) | Total Unique Peptides |
|-----------------------------------------------------------------------------|-----------------------|---------------|-----------------------------|-----------------------|
| Splice Isoform 1 of Receptor-type tyrosine-protein phosphatase N2 precursor | 111212                | IPI00334666.1 | 19.212                      | 11                    |
| Splice Isoform 1 of Regulator of nonsense transcripts 1                     | 124267                | IPI00034049.1 | 15.943                      | 12                    |
| Splice Isoform 1 of Regulator of nonsense transcripts 3B                    | 57727                 | IPI00023409.1 | 5.176                       | 2                     |
| Splice Isoform 1 of Reticulon 4                                             | 129851                | IPI00021766.3 | 7.886                       | 4                     |
| Splice Isoform 1 of Retinol dehydrogenase 11                                | 35363                 | IPI00339384.3 | 20.755                      | 5                     |
| Splice Isoform 1 of Rho guanine nucleotide exchange factor 12               | 173125                | IPI00022164.1 | 6.282                       | 6                     |
| Splice Isoform 1 of Rho guanine nucleotide exchange factor 7                | 73094                 | IPI00449906.3 | 6.656                       | 2                     |
| Splice Isoform 1 of Ribosome-binding protein 1                              | 152098                | IPI00220967.1 | 2.488                       | 2                     |
| Splice Isoform 1 of RING finger protein 31                                  | 119575                | IPI00094740.1 | 4.104                       | 2                     |
| Splice Isoform 1 of RNA 3'-terminal phosphate cyclase                       | 39311                 | IPI00011726.1 | 15.847                      | 4                     |
| Splice Isoform 1 of RNA-binding protein 8A                                  | 19877                 | IPI00001757.1 | 17.241                      | 2                     |
| Splice Isoform 1 of RNA-binding protein Musashi homolog 2                   | 35174                 | IPI00073713.3 | 26.524                      | 7                     |
| Splice Isoform 1 of RNA-binding region containing protein 2                 | 59343                 | IPI00163505.2 | 20.943                      | 9                     |
| Splice Isoform 1 of Sad1/unc-84 protein-like 1                              | 90007                 | IPI00401147.4 | 13.916                      | 5                     |
| Splice Isoform 1 of SEC14-like protein 2                                    | 46116                 | IPI00018314.1 | 8.189                       | 2                     |
| Splice Isoform 1 of SEC23 interacting protein                               | 111007                | IPI00026969.4 | 8.4                         | 6                     |
| Splice Isoform 1 of Seprase                                                 | 87765                 | IPI00295461.1 | 6.184                       | 3                     |
| Splice Isoform 1 of Serine beta-lactamase-like protein LACTB                | 60655                 | IPI00294186.4 | 10.055                      | 3                     |
| Splice Isoform 1 of Serine protease HTRA2, mitochondrial precursor          | 48811                 | IPI00001663.1 | 12.882                      | 4                     |
| Splice Isoform 1 of Serine/threonine-protein kinase PAK 4                   | 64032                 | IPI00014068.1 | 19.12                       | 9                     |
| Splice Isoform 1 of Serine/threonine-protein kinase WNK1                    | 250602                | IPI00004472.1 | 1.931                       | 3                     |
| Splice Isoform 1 of Serum paraoxonase/arylesterase 2                        | 39373                 | IPI00014958.1 | 36.723                      | 6                     |
| Splice Isoform 1 of SET binding factor 1                                    | 208125                | IPI00029446.2 | 1.876                       | 2                     |
| Splice Isoform 1 of SET protein                                             | 33469                 | IPI00072377.1 | 51.034                      | 12                    |
| Splice Isoform 1 of SH3 adapter protein SPIN90                              | 78910                 | IPI00009319.1 | 8.033                       | 4                     |
| Splice Isoform 1 of SH3 domain GRB2-like protein B1                         | 40771                 | IPI00006558.3 | 40.822                      | 13                    |
| Splice Isoform 1 of SH3 domain GRB2-like protein B2                         | 43947                 | IPI00024540.3 | 30.38                       | 7                     |
| Splice Isoform 1 of Signal recognition particle 68 kDa protein              | 70686                 | IPI00168388.1 | 35.726                      | 17                    |
| Splice Isoform 1 of Signal transducer and activator of transcription 3      | 88392                 | IPI00298887.5 | 17.076                      | 7                     |
| Splice Isoform 1 of Sodium/potassium-transporting ATPase beta-1 chain       | 35039                 | IPI00179529.2 | 31.353                      | 8                     |
| Splice Isoform 1 of Solute carrier family 12, member 2                      | 131364                | IPI00022649.3 | 5.611                       | 3                     |
| Splice Isoform 1 of Sorting nexin 12                                        | 19718                 | IPI00438170.3 | 46.512                      | 6                     |
| Splice Isoform 1 of Spartin                                                 | 72788                 | IPI00430622.1 | 3.754                       | 2                     |
| Splice Isoform 1 of Spastin                                                 | 67155                 | IPI00002707.1 | 7.468                       | 2                     |
| Splice Isoform 1 of Spectrin alpha chain, brain                             | 284352                | IPI00413728.2 | 1.497                       | 3                     |
| Splice Isoform 1 of Spectrin beta chain, brain 2                            | 271127                | IPI00012645.1 | 3.389                       | 6                     |
| Splice Isoform 1 of Splicing factor, arginine/serine-rich 7                 | 27350                 | IPI00003377.1 | 26.891                      | 7                     |

| Protein Description                                                                                               | Molecular Weight (Da) | IPI Number    | Total Sequence Coverage (%) | Total Unique Peptides |
|-------------------------------------------------------------------------------------------------------------------|-----------------------|---------------|-----------------------------|-----------------------|
| Splice Isoform 1 of Sulfatase modifying factor 2 precursor                                                        | 33836                 | IPI00171412.1 | 20.266                      | 6                     |
| Splice Isoform 1 of Suppressor of Ty 6 homolog protein                                                            | 198949                | IPI00456681.1 | 5.91                        | 6                     |
| Splice Isoform 1 of Surfeit locus protein 4                                                                       | 30374                 | IPI00005737.1 | 10.409                      | 2                     |
| Splice Isoform 1 of SWI/SNF-related matrix-associated actin-dependent regulator of chromatin subfamily D member 1 | 54910                 | IPI00062599.1 | 7.143                       | 2                     |
| Splice Isoform 1 of Syntaxin-1A                                                                                   | 33003                 | IPI00003370.1 | 28.472                      | 8                     |
| Splice Isoform 1 of Tenascin precursor                                                                            | 240713                | IPI00031008.1 | 1.863                       | 3                     |
| Splice Isoform 1 of Testin                                                                                        | 47964                 | IPI00024097.3 | 23.99                       | 8                     |
| Splice Isoform 1 of Trafficking protein particle complex subunit 6B                                               | 17971                 | IPI00384047.1 | 13.924                      | 2                     |
| Splice Isoform 1 of Transcription elongation factor A protein 1                                                   | 33948                 | IPI00333215.1 | 40.199                      | 8                     |
| Splice Isoform 1 of Transcription intermediary factor 1-beta                                                      | 88493                 | IPI00438229.1 | 36.048                      | 20                    |
| Splice Isoform 1 of Transcriptional regulator ATRX                                                                | 259662                | IPI00220107.1 | 0.787                       | 2                     |
| Splice Isoform 1 of Transforming acidic coiled-coil-containing protein 1                                          | 87740                 | IPI00025683.2 | 10.559                      | 5                     |
| Splice Isoform 1 of Translation initiation factor eIF-2B delta subunit                                            | 57521                 | IPI00005979.2 | 18.164                      | 7                     |
| Splice Isoform 1 of Translation initiation factor eIF-2B gamma subunit                                            | 50208                 | IPI00006504.3 | 15.929                      | 4                     |
| Splice Isoform 1 of Tripeptidyl-peptidase I precursor                                                             | 61191                 | IPI00298237.4 | 21.314                      | 8                     |
| Splice Isoform 1 of tRNA-nucleotidyltransferase 1, mitochondrial precursor                                        | 50112                 | IPI00289807.3 | 29.493                      | 7                     |
| Splice Isoform 1 of TRS85 homolog                                                                                 | 160840                | IPI00007253.3 | 2.997                       | 3                     |
| Splice Isoform 1 of Tubulointerstitial nephritis antigen-like precursor                                           | 52353                 | IPI00005563.1 | 8.351                       | 2                     |
| Splice Isoform 1 of Tumor susceptibility gene 101 protein                                                         | 43916                 | IPI00018434.1 | 11.538                      | 4                     |
| Splice Isoform 1 of U4/U6 small nuclear ribonucleoprotein Prp4                                                    | 58412                 | IPI00150269.1 | 10.345                      | 4                     |
| Splice Isoform 1 of Ubiquilin-1                                                                                   | 62479                 | IPI00099550.1 | 20.204                      | 7                     |
| Splice Isoform 1 of Ubiquitin carboxyl-terminal hydrolase 15                                                      | 112348                | IPI00000728.3 | 4.179                       | 2                     |
| Splice Isoform 1 of Ubiquitin thiolesterase protein OTUB1                                                         | 31264                 | IPI00549574.2 | 25.461                      | 7                     |
| Splice Isoform 1 of UDP-N-acetylglucosamine--peptide N-acetylglucosaminyltransferase 110 kDa subunit              | 115632                | IPI00005780.2 | 8.687                       | 5                     |
| Splice Isoform 1 of Uridine 5'-monophosphate synthase                                                             | 52189                 | IPI00003923.1 | 6.667                       | 2                     |
| Splice Isoform 1 of Vacuolar ATP synthase subunit H                                                               | 55847                 | IPI00296191.1 | 25.466                      | 11                    |
| Splice Isoform 1 of Vacuolar protein sorting 16                                                                   | 94634                 | IPI00305438.3 | 10.489                      | 4                     |
| Splice Isoform 1 of Vacuolar protein sorting 18                                                                   | 110116                | IPI00001985.2 | 6.578                       | 4                     |
| Splice Isoform 1 of Vacuolar protein sorting 29                                                                   | 20493                 | IPI00170796.1 | 36.264                      | 4                     |
| Splice Isoform 1 of Vascular cell adhesion protein 1 precursor                                                    | 81224                 | IPI00018136.1 | 8.119                       | 3                     |
| Splice Isoform 1 of Vesicle-associated membrane protein-associated protein B/C                                    | 27211                 | IPI00006211.3 | 29.63                       | 7                     |
| Splice Isoform 1 of Voltage-dependent anion-selective channel protein 2                                           | 38069                 | IPI00024145.1 | 13.545                      | 5                     |
| Splice Isoform 1 of Voltage-dependent anion-selective channel protein 3                                           | 30639                 | IPI00031804.1 | 48.763                      | 9                     |
| Splice Isoform 1 of WIP-related protein                                                                           | 46260                 | IPI00435947.2 | 7.727                       | 2                     |
| Splice Isoform 1 of YLP motif containing protein 1                                                                | 219849                | IPI00165434.2 | 4.869                       | 5                     |

| Protein Description                                                                     | Molecular Weight (Da) | IPI Number    | Total Sequence Coverage (%) | Total Unique Peptides |
|-----------------------------------------------------------------------------------------|-----------------------|---------------|-----------------------------|-----------------------|
| Splice Isoform 1 of YTH domain protein 2                                                | 62296                 | IPI00306043.1 | 8.463                       | 4                     |
| Splice Isoform 1 of Zinc finger CCCH type antiviral protein 1                           | 101380                | IPI00410067.1 | 9.645                       | 6                     |
| Splice Isoform 1 of Zinc finger FYVE domain-containing protein 16                       | 168743                | IPI00424460.1 | 2.534                       | 2                     |
| Splice Isoform 1 of Zinc finger protein 207                                             | 50717                 | IPI00013457.1 | 5.23                        | 3                     |
| Splice Isoform 1A of Beta-arrestin 1                                                    | 47036                 | IPI00293857.1 | 9.809                       | 2                     |
| Splice Isoform 1AB of Catenin delta-1                                                   | 107283                | IPI00182469.2 | 42.62                       | 31                    |
| Splice Isoform 1B of AMP deaminase 3                                                    | 88756                 | IPI00300573.2 | 4.824                       | 2                     |
| Splice Isoform 2 of 6-phosphofructo-2-kinase/fructose-2,6-biphosphatase 2               | 54372                 | IPI00220808.1 | 42.038                      | 19                    |
| Splice Isoform 2 of Acyl-coenzyme A oxidase 1, peroxisomal                              | 74638                 | IPI00477729.1 | 28.788                      | 13                    |
| Splice Isoform 2 of Adapter-related protein complex 2 beta 1 subunit                    | 105783                | IPI00220991.2 | 9.129                       | 4                     |
| Splice Isoform 2 of Ankyrin repeat and SOCS box protein 9                               | 27884                 | IPI00216580.3 | 32.061                      | 5                     |
| Splice Isoform 2 of ATP-binding cassette, sub-family F, member 1                        | 91623                 | IPI00013495.1 | 10.533                      | 8                     |
| Splice Isoform 2 of Band 4.1-like protein 4B                                            | 56964                 | IPI00100362.1 | 6.349                       | 2                     |
| Splice Isoform 2 of Basigin precursor                                                   | 29203                 | IPI00019906.1 | 10.037                      | 2                     |
| Splice Isoform 2 of Bcl-2-like 13 protein                                               | 52691                 | IPI00011635.3 | 18.351                      | 4                     |
| Splice Isoform 2 of C6.1A protein                                                       | 36428                 | IPI00008289.3 | 6.875                       | 2                     |
| Splice Isoform 2 of Calcium/calmodulin-dependent protein kinase type II beta chain      | 56344                 | IPI00219165.1 | 9.344                       | 3                     |
| Splice Isoform 2 of Calpain inhibitor                                                   | 75171                 | IPI00220857.1 | 42.734                      | 24                    |
| Splice Isoform 2 of Cat eye syndrome critical region protein 5 precursor                | 46292                 | IPI00011511.1 | 11.348                      | 3                     |
| Splice Isoform 2 of Cell division control protein 42 homolog                            | 21245                 | IPI00016786.1 | 53.403                      | 11                    |
| Splice Isoform 2 of Conserved oligomeric Golgi complex component 6                      | 63162                 | IPI00398963.3 | 4.085                       | 2                     |
| Splice Isoform 2 of Diaphanous protein homolog 2                                        | 124748                | IPI00032393.4 | 8.394                       | 5                     |
| Splice Isoform 2 of DnaJ homolog subfamily A member 3, mitochondrial precursor          | 49629                 | IPI00179187.3 | 8.168                       | 2                     |
| Splice Isoform 2 of Epsin 4                                                             | 68123                 | IPI00397519.3 | 24.16                       | 11                    |
| Splice Isoform 2 of Fragile X mental retardation 1 protein                              | 69982                 | IPI00215721.1 | 6.129                       | 3                     |
| Splice Isoform 2 of Gamma adducin                                                       | 79105                 | IPI00004408.1 | 7.932                       | 2                     |
| Splice Isoform 2 of Golgi reassembly stacking protein 2                                 | 39743                 | IPI00456613.1 | 21.094                      | 6                     |
| Splice Isoform 2 of G-rich sequence factor-1                                            | 47951                 | IPI00444704.2 | 29.953                      | 9                     |
| Splice Isoform 2 of GRIP and coiled-coil domain-containing protein 2                    | 195790                | IPI00333197.3 | 3.504                       | 3                     |
| Splice Isoform 2 of Inositol 1,4,5-trisphosphate receptor type 1                        | 311981                | IPI00218658.1 | 1.203                       | 2                     |
| Splice Isoform 2 of Intersectin 1                                                       | 137590                | IPI00220592.1 | 1.721                       | 2                     |
| Splice Isoform 2 of Liprin-beta 1                                                       | 113124                | IPI00179172.5 | 6.766                       | 3                     |
| Splice Isoform 2 of Lysine-specific histone demethylase 1                               | 95096                 | IPI00217540.7 | 3.082                       | 2                     |
| Splice Isoform 2 of Methylcrotonoyl-CoA carboxylase beta chain, mitochondrial precursor | 57642                 | IPI00294140.4 | 52.941                      | 19                    |
| Splice Isoform 2 of Microtubule-actin crosslinking factor 1, isoforms 1/2/3/5           | 620033                | IPI00256861.4 | 13.112                      | 38                    |

| Protein Description                                                                                               | Molecular Weight (Da) | IPI Number    | Total Sequence Coverage (%) | Total Unique Peptides |
|-------------------------------------------------------------------------------------------------------------------|-----------------------|---------------|-----------------------------|-----------------------|
| Splice Isoform 2 of Microtubule-associated protein RP/EB family member 3                                          | 30361                 | IPI00553216.1 | 21.429                      | 4                     |
| Splice Isoform 2 of Myosin light chain kinase, smooth muscle and non-muscle isozymes                              | 203001                | IPI00221255.1 | 1.192                       | 2                     |
| Splice Isoform 2 of Myosin VI                                                                                     | 145956                | IPI00008455.1 | 20.681                      | 20                    |
| Splice Isoform 2 of Nitrilase homolog 1                                                                           | 35873                 | IPI00023779.1 | 9.48                        | 2                     |
| Splice Isoform 2 of Nuclear mitotic apparatus protein 1                                                           | 236387                | IPI00006196.2 | 16.373                      | 19                    |
| Splice Isoform 2 of p130Cas-associated protein                                                                    | 107971                | IPI00396130.4 | 5.929                       | 3                     |
| Splice Isoform 2 of Phosphatidylinositol-binding clathrin assembly protein                                        | 68662                 | IPI00216184.2 | 24.842                      | 8                     |
| Splice Isoform 2 of Phosphoglucomutase                                                                            | 61921                 | IPI00217872.2 | 48.319                      | 24                    |
| Splice Isoform 2 of Plakophilin 2                                                                                 | 97339                 | IPI00005264.1 | 8.967                       | 4                     |
| Splice Isoform 2 of Prolyl 4-hydroxylase alpha-1 subunit precursor                                                | 60929                 | IPI00218682.1 | 19.288                      | 8                     |
| Splice Isoform 2 of Protein C20orf43                                                                              | 31883                 | IPI00218962.1 | 14.983                      | 2                     |
| Splice Isoform 2 of Ras-related protein Rab-6A                                                                    | 23534                 | IPI00217943.1 | 30.769                      | 6                     |
| Splice Isoform 2 of RNA-binding protein Raly                                                                      | 32444                 | IPI00011268.1 | 35.294                      | 9                     |
| Splice Isoform 2 of Serine/threonine-protein kinase PAK 3                                                         | 60655                 | IPI00027382.1 | 12.684                      | 6                     |
| Splice Isoform 2 of Spectrin alpha chain, brain                                                                   | 285306                | IPI00478292.1 | 41.613                      | 82                    |
| Splice Isoform 2 of Splicing factor 1                                                                             | 68589                 | IPI00294627.1 | 15.987                      | 9                     |
| Splice Isoform 2 of Splicing factor, arginine/serine-rich 12                                                      | 71606                 | IPI00375462.1 | 7.212                       | 3                     |
| Splice Isoform 2 of Succinyl-CoA ligase [ADP-forming] beta-chain, mitochondrial precursor                         | 48023                 | IPI00217232.1 | 42.63                       | 13                    |
| Splice Isoform 2 of Supervillin                                                                                   | 200668                | IPI00018370.3 | 1.622                       | 2                     |
| Splice Isoform 2 of Suppressor of potassium transport defect 3                                                    | 75402                 | IPI00216192.3 | 10.931                      | 5                     |
| Splice Isoform 2 of SWI/SNF-related matrix-associated actin-dependent regulator of chromatin subfamily C member 2 | 124764                | IPI00150057.4 | 10.885                      | 10                    |
| Splice Isoform 2 of SWI/SNF-related matrix-associated actin-dependent regulator of chromatin subfamily E member 1 | 41754                 | IPI00470489.1 | 19.008                      | 6                     |
| Splice Isoform 2 of Synaptopodin                                                                                  | 96337                 | IPI00027258.3 | 16.501                      | 8                     |
| Splice Isoform 2 of Syntaxin binding protein 1                                                                    | 68692                 | IPI00046057.1 | 43.781                      | 19                    |
| Splice Isoform 2 of Thioredoxin reductase 2, mitochondrial precursor                                              | 53888                 | IPI00157820.2 | 14.659                      | 6                     |
| Splice Isoform 2 of Triple functional domain protein                                                              | 262535                | IPI00479523.1 | 1.82                        | 2                     |
| Splice Isoform 2 of Tumor protein D54                                                                             | 19889                 | IPI00221178.1 | 60.753                      | 9                     |
| Splice Isoform 2 of U1 small nuclear ribonucleoprotein 70 kDa                                                     | 50587                 | IPI00219483.1 | 10.748                      | 4                     |
| Splice Isoform 2 of Ubiquitin carboxyl-terminal hydrolase isozyme L5                                              | 36090                 | IPI00219512.1 | 18.038                      | 4                     |
| Splice Isoform 2 of Ubiquitin ligase protein LRSAM1                                                               | 80377                 | IPI00289113.2 | 5.172                       | 2                     |
| Splice Isoform 2 of Vacuolar proton translocating ATPase 116 kDa subunit a isoform 1                              | 95694                 | IPI00465178.3 | 20.457                      | 14                    |
| Splice Isoform 2 of Valacyclovir hydrolase precursor                                                              | 31087                 | IPI00003990.1 | 32.117                      | 5                     |

| Protein Description                                                                     | Molecular Weight (Da) | IPI Number    | Total Sequence Coverage (%) | Total Unique Peptides |
|-----------------------------------------------------------------------------------------|-----------------------|---------------|-----------------------------|-----------------------|
| Splice Isoform 2 of WD-repeat protein 1                                                 | 57835                 | IPI00216256.2 | 1.876                       | 2                     |
| Splice Isoform 2B of Dynein intermediate chain 2, cytosolic                             | 70601                 | IPI00412601.2 | 27.69                       | 13                    |
| Splice Isoform 2B of Transforming protein p21                                           | 21411                 | IPI00423570.1 | 39.894                      | 6                     |
| Splice Isoform 2C2 of Collagen alpha 2(VI) chain precursor                              | 108506                | IPI00304840.3 | 10.108                      | 11                    |
| Splice Isoform 3 of Anamorsin                                                           | 32192                 | IPI00025333.2 | 10.368                      | 2                     |
| Splice Isoform 3 of Canalicular multispecific organic anion transporter 2               | 169234                | IPI00006674.1 | 3.733                       | 3                     |
| Splice Isoform 3 of Exocyst complex component 7                                         | 83330                 | IPI00103064.4 | 27.619                      | 11                    |
| Splice Isoform 3 of Heterogeneous nuclear ribonucleoprotein A/B                         | 30569                 | IPI00334713.1 | 43.158                      | 14                    |
| Splice Isoform 3 of LAP4 protein                                                        | 177632                | IPI00410666.1 | 10.876                      | 9                     |
| Splice Isoform 3 of LIM domain only protein 7                                           | 153589                | IPI00291802.3 | 12.75                       | 10                    |
| Splice Isoform 3 of Periphilin 1                                                        | 49594                 | IPI00152093.3 | 5.069                       | 2                     |
| Splice Isoform 3 of Protein C14orf159, mitochondrial precursor                          | 62742                 | IPI00328443.1 | 13.597                      | 6                     |
| Splice Isoform 3 of Pumilio homolog 2                                                   | 113933                | IPI00022184.1 | 2.538                       | 2                     |
| Splice Isoform 3 of Ribosome-binding protein 1                                          | 152624                | IPI00215743.2 | 59.618                      | 90                    |
| Splice Isoform 3 of Tyrosine-protein phosphatase, non-receptor type 6                   | 63086                 | IPI00183046.2 | 6.835                       | 3                     |
| Splice Isoform 4 of FUS interacting serine-arginine rich protein 1                      | 20987                 | IPI00386662.1 | 35.838                      | 6                     |
| Splice Isoform 4 of Intersectin 2                                                       | 134929                | IPI00216423.1 | 1.343                       | 2                     |
| Splice Isoform 4 of Nuclear factor 1 C-type                                             | 55640                 | IPI00029795.1 | 15.157                      | 4                     |
| Splice Isoform 5 of Interleukin enhancer-binding factor 3                               | 74606                 | IPI00219330.1 | 9.42                        | 6                     |
| Splice Isoform 7 of Partitioning-defective 3 homolog                                    | 141644                | IPI00045423.1 | 2.749                       | 3                     |
| Splice Isoform A of 27 kDa Golgi SNARE protein                                          | 24760                 | IPI00023135.4 | 30.189                      | 5                     |
| Splice Isoform A of Adapter-related protein complex 1 beta 1 subunit                    | 104540                | IPI00328257.4 | 14.542                      | 9                     |
| Splice Isoform A of A-kinase anchor protein 2                                           | 121997                | IPI00032064.1 | 6.256                       | 5                     |
| Splice Isoform A of Band 4.1-like protein 3                                             | 120603                | IPI00032230.2 | 21.159                      | 16                    |
| Splice Isoform A of Bifunctional 3'-phosphoadenosine 5'-phosphosulfate synthetase 2     | 69457                 | IPI00030009.2 | 51.466                      | 27                    |
| Splice Isoform A of Branched-chain-amino-acid aminotransferase, mitochondrial precursor | 44259                 | IPI00396258.3 | 37.755                      | 8                     |
| Splice Isoform A of Chloride intracellular channel 6                                    | 70953                 | IPI00165936.1 | 12.828                      | 5                     |
| Splice Isoform A of Decorin precursor                                                   | 39722                 | IPI00012119.1 | 6.128                       | 2                     |
| Splice Isoform a of DnaJ homolog subfamily C member 12                                  | 23400                 | IPI00029149.1 | 23.737                      | 5                     |
| Splice Isoform A of Formimidoyltransferase-cyclodeaminase                               | 58889                 | IPI00001441.3 | 7.394                       | 2                     |
| Splice Isoform A of Inositol polyphosphate 5-phosphatase OCRL-1                         | 104451                | IPI00216271.4 | 4.978                       | 4                     |
| Splice Isoform A of Kinesin light chain 1                                               | 64746                 | IPI00020096.1 | 35.852                      | 15                    |
| Splice Isoform A of Lamin A/C                                                           | 74095                 | IPI00021405.3 | 70.633                      | 80                    |
| Splice Isoform A of Neuronal-specific septin 3                                          | 39320                 | IPI00248956.1 | 6.957                       | 2                     |
| Splice Isoform A of Osteopontin precursor                                               | 35401                 | IPI00021000.1 | 42.357                      | 10                    |

| Protein Description                                                                           | Molecular Weight (Da) | IPI Number    | Total Sequence Coverage (%) | Total Unique Peptides |
|-----------------------------------------------------------------------------------------------|-----------------------|---------------|-----------------------------|-----------------------|
| Splice Isoform A of Peptidyl-prolyl cis-trans isomerase E                                     | 33410                 | IPI00009316.3 | 8.306                       | 2                     |
| Splice Isoform A of Probable cation-transporting ATPase 13A1                                  | 132870                | IPI00034277.1 | 15.199                      | 12                    |
| Splice Isoform A of Protein CutA precursor                                                    | 20912                 | IPI00034319.2 | 27.778                      | 3                     |
| Splice Isoform A of Ras-GTPase-activating protein binding protein 2                           | 54078                 | IPI00009057.1 | 28.423                      | 8                     |
| Splice Isoform A of SON protein                                                               | 232178                | IPI00218617.1 | 6.916                       | 6                     |
| Splice Isoform A1 of Tight junction protein ZO-2                                              | 133890                | IPI00003843.1 | 22.269                      | 17                    |
| Splice Isoform AGX2 of UDP-N-acetylhexosamine pyrophosphorylase                               | 58803                 | IPI00000684.3 | 6.322                       | 3                     |
| Splice Isoform Alpha' of Caspase-7 precursor                                                  | 37790                 | IPI00216675.1 | 20.238                      | 4                     |
| Splice Isoform Alpha of Nuclear inhibitor of protein phosphatase-1                            | 38455                 | IPI00030383.1 | 24.786                      | 4                     |
| Splice Isoform Alpha of Paxillin                                                              | 60897                 | IPI00220030.1 | 19.031                      | 5                     |
| Splice Isoform Alpha of Signal transducer and activator of transcription 1-alpha/beta         | 87280                 | IPI00030781.1 | 24.267                      | 15                    |
| Splice Isoform Alpha of Tripartite motif protein 3                                            | 80786                 | IPI00152001.1 | 3.091                       | 2                     |
| Splice Isoform Alpha-1 of Protein phosphatase 2C alpha isoform                                | 42421                 | IPI00020950.1 | 9.948                       | 3                     |
| Splice Isoform APP770 of Amyloid beta A4 protein precursor                                    | 86888                 | IPI00006608.1 | 3.896                       | 3                     |
| Splice Isoform B of Adapter-related protein complex 2 alpha 1 subunit                         | 105304                | IPI00256684.1 | 17.487                      | 10                    |
| Splice Isoform B of Arfaptin 1                                                                | 41713                 | IPI00021258.2 | 41.823                      | 10                    |
| Splice Isoform B of Arsenite-resistance protein 2                                             | 100214                | IPI00220038.1 | 24.656                      | 15                    |
| Splice Isoform B of Isocitrate dehydrogenase [NAD] subunit beta, mitochondrial precursor      | 42185                 | IPI00304417.5 | 49.87                       | 15                    |
| Splice Isoform B of Mannose-6-phosphate receptor binding protein 1                            | 47004                 | IPI00303882.1 | 62.212                      | 18                    |
| Splice Isoform B of Phosphate carrier protein, mitochondrial precursor                        | 39933                 | IPI00215777.1 | 24.1                        | 8                     |
| Splice Isoform B of Serine/threonine-protein kinase 24                                        | 49277                 | IPI00002212.1 | 15.124                      | 5                     |
| Splice Isoform B of Syntaxin-16                                                               | 36840                 | IPI00023149.2 | 12.346                      | 2                     |
| Splice Isoform B of Syntaxin-3                                                                | 28842                 | IPI00220099.1 | 26.587                      | 6                     |
| Splice Isoform B1 of Heterogeneous nuclear ribonucleoproteins A2/B1                           | 37407                 | IPI00396378.3 | 73.371                      | 33                    |
| Splice Isoform Beta of Epithelial protein lost in neoplasm                                    | 85173                 | IPI00008918.1 | 45.191                      | 29                    |
| Splice Isoform Beta of Heat-shock protein 105 kDa                                             | 92057                 | IPI00218993.1 | 29.853                      | 17                    |
| Splice Isoform Beta of Lamina-associated polypeptide 2, isoforms beta/gamma                   | 50639                 | IPI00030131.2 | 5.727                       | 2                     |
| Splice Isoform Beta of Nucleolar phosphoprotein p130                                          | 74819                 | IPI00216654.1 | 15.233                      | 9                     |
| Splice Isoform Beta of Pancreatic secretory granule membrane major glycoprotein GP2 precursor | 42117                 | IPI00299429.4 | 7.368                       | 2                     |
| Splice Isoform Beta of Poliovirus receptor precursor                                          | 40100                 | IPI00219425.3 | 11.559                      | 3                     |
| Splice Isoform Beta of Striatin 3                                                             | 87606                 | IPI00011461.3 | 9.5                         | 3                     |
| Splice Isoform Beta of Vinexin                                                                | 36707                 | IPI00472540.1 | 20.669                      | 3                     |
| Splice Isoform Beta-1 of Protein phosphatase 2C beta isoform                                  | 52609                 | IPI00026612.1 | 12.735                      | 3                     |
| Splice Isoform Beta-1A of Integrin beta-1 precursor                                           | 88407                 | IPI00217563.3 | 21.93                       | 15                    |



| Protein Description                                                                               | Molecular Weight (Da) | IPI Number    | Total Sequence Coverage (%) | Total Unique Peptides |
|---------------------------------------------------------------------------------------------------|-----------------------|---------------|-----------------------------|-----------------------|
| Splice Isoform Beta-2 of DNA topoisomerase II, beta isozyme                                       | 183152                | IPI00027280.2 | 9.594                       | 10                    |
| Splice Isoform Brain of Clathrin light chain A                                                    | 27060                 | IPI00014587.1 | 22.581                      | 6                     |
| Splice Isoform Brain of Clathrin light chain B                                                    | 25175                 | IPI00014589.1 | 17.904                      | 3                     |
| Splice Isoform BTF3A of Transcription factor BTF3                                                 | 22154                 | IPI00221035.2 | 46.117                      | 6                     |
| Splice Isoform C2 of Heterogeneous nuclear ribonucleoproteins C1/C2                               | 33667                 | IPI00013944.2 | 13.399                      | 2                     |
| Splice Isoform CD44 of CD44 antigen precursor                                                     | 81503                 | IPI00305064.1 | 15.499                      | 13                    |
| Splice Isoform CFL2b of Cofilin, muscle isoform                                                   | 18725                 | IPI00413344.2 | 57.229                      | 11                    |
| Splice Isoform CNPI of 2',3'-cyclic-nucleotide 3'-phosphodiesterase                               | 45070                 | IPI00220993.1 | 24.688                      | 7                     |
| Splice Isoform CREB-A of cAMP response element binding protein                                    | 36666                 | IPI00027713.1 | 12.903                      | 2                     |
| Splice Isoform Crk-II of Proto-oncogene C-crk                                                     | 33851                 | IPI00004838.1 | 23.684                      | 4                     |
| Splice Isoform D of Plasma membrane calcium-transporting ATPase 1                                 | 138668                | IPI00021695.1 | 9.936                       | 7                     |
| Splice Isoform DFF45 of DNA fragmentation factor alpha subunit                                    | 36500                 | IPI00010882.3 | 14.804                      | 3                     |
| Splice Isoform DPI of Desmoplakin                                                                 | 331571                | IPI00013933.1 | 29.119                      | 71                    |
| Splice Isoform DUT-M of Deoxyuridine 5'-triphosphate nucleotidohydrolase, mitochondrial precursor | 26690                 | IPI00013679.1 | 21.429                      | 4                     |
| Splice Isoform EWS of RNA-binding protein EWS                                                     | 68436                 | IPI00009841.3 | 10.823                      | 4                     |
| Splice Isoform GAC of Glutaminase, kidney isoform, mitochondrial precursor                        | 65418                 | IPI00215687.1 | 29.431                      | 11                    |
| Splice Isoform GCH-1 of GTP cyclohydrolase I                                                      | 27885                 | IPI00027492.1 | 8.4                         | 2                     |
| Splice Isoform GTBP-N of DNA mismatch repair protein MSH6                                         | 152761                | IPI00384456.3 | 1.691                       | 2                     |
| Splice Isoform I of Septin 6                                                                      | 48842                 | IPI00216139.1 | 14.52                       | 3                     |
| Splice Isoform I of T-cell surface glycoprotein E2 precursor                                      | 18836                 | IPI00253036.5 | 15.676                      | 2                     |
| Splice Isoform II of Ubiquitin-protein ligase E3A                                                 | 100581                | IPI00011609.3 | 3.314                       | 2                     |
| Splice Isoform IIb of Prolyl 4-hydroxylase alpha-2 subunit precursor                              | 60864                 | IPI00003128.1 | 6.355                       | 2                     |
| Splice Isoform KGA of Glutaminase, kidney isoform, mitochondrial precursor                        | 73414                 | IPI00289159.3 | 45.142                      | 20                    |
| Splice Isoform LAMP-2A of Lysosome-associated membrane glycoprotein 2 precursor                   | 44932                 | IPI00009030.1 | 16.341                      | 7                     |
| Splice Isoform Liver of ATP synthase gamma chain, mitochondrial precursor                         | 34432                 | IPI00478410.1 | 47.249                      | 12                    |
| Splice Isoform LMP2.L of Proteasome subunit beta type 9 precursor                                 | 23250                 | IPI00000787.1 | 15.525                      | 3                     |
| Splice Isoform Long of 60-kDa SS-A/Ro ribonucleoprotein                                           | 60631                 | IPI00019450.2 | 17.1                        | 7                     |
| Splice Isoform Long of Active breakpoint cluster region-related protein                           | 97635                 | IPI00030389.1 | 6.868                       | 3                     |
| Splice Isoform Long of Adenosine kinase                                                           | 40520                 | IPI00290279.1 | 34.254                      | 9                     |
| Splice Isoform Long of Armadillo repeat protein deleted in velo-cardio-facial syndrome            | 104577                | IPI00010490.1 | 5.509                       | 5                     |
| Splice Isoform Long of ATP-binding cassette, sub-family B, member 8, mitochondrial precursor      | 79897                 | IPI00019022.1 | 4.218                       | 2                     |
| Splice Isoform Long of Beta-glucuronidase precursor                                               | 74669                 | IPI00027745.3 | 2.151                       | 2                     |
| Splice Isoform Long of Collagen alpha 1(XVIII) chain precursor                                    | 153732                | IPI00022822.2 | 6.266                       | 4                     |

| Protein Description                                                                   | Molecular Weight (Da) | IPI Number    | Total Sequence Coverage (%) | Total Unique Peptides |
|---------------------------------------------------------------------------------------|-----------------------|---------------|-----------------------------|-----------------------|
| Splice Isoform Long of Delta 1-pyrroline-5-carboxylate synthetase                     | 87248                 | IPI00008982.1 | 38.616                      | 24                    |
| Splice Isoform Long of Double-stranded RNA-binding protein Staufen homolog            | 63228                 | IPI00000001.1 | 10.052                      | 6                     |
| Splice Isoform Long of ES1 protein homolog, mitochondrial precursor                   | 28125                 | IPI00024913.1 | 54.104                      | 11                    |
| Splice Isoform Long of Eukaryotic translation initiation factor 4H                    | 27368                 | IPI00014263.1 | 49.597                      | 12                    |
| Splice Isoform Long of Galectin-9                                                     | 39493                 | IPI00010477.1 | 7.606                       | 2                     |
| Splice Isoform Long of Glutaryl-CoA dehydrogenase, mitochondrial precursor            | 48096                 | IPI00024317.1 | 22.603                      | 6                     |
| Splice Isoform Long of Glycylpeptide N-tetradecanoyltransferase 1                     | 56770                 | IPI00329692.3 | 24.194                      | 8                     |
| Splice Isoform Long of Laminin gamma-2 chain precursor                                | 130906                | IPI00015117.1 | 9.137                       | 8                     |
| Splice Isoform Long of Long-chain-fatty-acid--CoA ligase 4                            | 79137                 | IPI00029737.1 | 12.658                      | 5                     |
| Splice Isoform Long of Metastasis-associated protein MTA1                             | 80737                 | IPI00012773.1 | 7.692                       | 4                     |
| Splice Isoform Long of Nucleolysin TIA-1                                              | 42934                 | IPI00291398.1 | 5.44                        | 2                     |
| Splice Isoform Long of Possible global transcription activator SNF2L2                 | 180650                | IPI00289880.3 | 2.396                       | 4                     |
| Splice Isoform Long of Potential phospholipid-transporting ATPase IA                  | 131285                | IPI00032402.1 | 3.351                       | 3                     |
| Splice Isoform Long of Potential phospholipid-transporting ATPase IIA                 | 118506                | IPI00024368.1 | 9.265                       | 7                     |
| Splice Isoform Long of Restin                                                         | 160891                | IPI00027172.1 | 4.905                       | 4                     |
| Splice Isoform Long of Sodium/potassium-transporting ATPase alpha-1 chain precursor   | 112824                | IPI00006482.1 | 20.039                      | 24                    |
| Splice Isoform Long of Spectrin beta chain, brain 1                                   | 274461                | IPI00005614.3 | 26.607                      | 40                    |
| Splice Isoform Long of Splicing factor, proline-and glutamine-rich                    | 76102                 | IPI00010740.1 | 36.634                      | 27                    |
| Splice Isoform Long of TRAF family member-associated NF-kappa-B activator             | 47594                 | IPI00299166.1 | 7.059                       | 2                     |
| Splice Isoform Long of Transformer-2 protein homolog                                  | 32669                 | IPI00013891.1 | 19.149                      | 4                     |
| Splice Isoform Long of Trifunctional purine biosynthetic protein adenosine-3          | 107699                | IPI00025273.1 | 13.069                      | 8                     |
| Splice Isoform Long of Tyrosine-protein kinase SYK                                    | 72020                 | IPI00018597.1 | 4.094                       | 2                     |
| Splice Isoform Long of Ubiquitin carboxyl-terminal hydrolase 5                        | 95725                 | IPI00024664.1 | 38.811                      | 22                    |
| Splice Isoform Long of Vesicle transport through interaction with t-SNAREs homolog 1B | 26671                 | IPI00063784.2 | 9.483                       | 2                     |
| Splice Isoform MEA6 of Cutaneous T-cell lymphoma-associated antigen 5                 | 90898                 | IPI00006122.2 | 17.04                       | 10                    |
| Splice Isoform Meis2C of Homeobox protein Meis2                                       | 51757                 | IPI00023696.1 | 12.998                      | 3                     |
| Splice Isoform Mitochondrial of Glycine amidinotransferase, mitochondrial precursor   | 48424                 | IPI00032103.3 | 52.246                      | 21                    |
| Splice Isoform OA3-323 of Leukocyte surface antigen CD47 precursor                    | 35191                 | IPI00374740.3 | 10.217                      | 3                     |
| Splice Isoform OS-9-1 of Protein OS-9 precursor                                       | 75661                 | IPI00329760.6 | 7.91                        | 3                     |
| Splice Isoform p150 of Dynactin-1                                                     | 141607                | IPI00029485.2 | 28.873                      | 28                    |
| Splice Isoform p27-L of 26S proteasome non-ATPase regulatory subunit 9                | 24638                 | IPI00010860.1 | 24.215                      | 5                     |
| Splice Isoform PLD1A of Phospholipase D1                                              | 124106                | IPI00012865.1 | 3.538                       | 2                     |
| Splice Isoform PML-1 of Probable transcription factor PML                             | 97455                 | IPI00022348.1 | 7.256                       | 6                     |
| Splice Isoform RTN1-A of Reticulon 1                                                  | 83566                 | IPI00003971.1 | 42.268                      | 21                    |

| Protein Description                                                                  | Molecular Weight (Da) | IPI Number    | Total Sequence Coverage (%) | Total Unique Peptides |
|--------------------------------------------------------------------------------------|-----------------------|---------------|-----------------------------|-----------------------|
| Splice Isoform S2 of BCL2/adenovirus E1B 19-kDa protein-interacting protein 1        | 31178                 | IPI00030397.1 | 11.439                      | 2                     |
| Splice Isoform Sap-mu-0 of Proactivator polypeptide precursor                        | 58074                 | IPI00012503.1 | 30.534                      | 11                    |
| Splice Isoform SERCA1B of Sarcoplasmic/endoplasmic reticulum calcium ATPase 1        | 110182                | IPI00024804.3 | 2.298                       | 2                     |
| Splice Isoform SERCA2A of Sarcoplasmic/endoplasmic reticulum calcium ATPase 2        | 109620                | IPI00177817.4 | 21.866                      | 18                    |
| Splice Isoform SERCA3B of Sarcoplasmic/endoplasmic reticulum calcium ATPase 3        | 113904                | IPI00004092.2 | 12.943                      | 10                    |
| Splice Isoform Short of Dematin                                                      | 43061                 | IPI00216633.1 | 19.843                      | 4                     |
| Splice Isoform Short of Heterogenous nuclear ribonucleoprotein U                     | 88890                 | IPI00386491.4 | 45.658                      | 40                    |
| Splice Isoform Short of HLA class II histocompatibility antigen, gamma chain         | 26381                 | IPI00217775.1 | 15.948                      | 3                     |
| Splice Isoform Short of NADPH:adrenodoxin oxidoreductase, mitochondrial precursor    | 53775                 | IPI00026958.3 | 26.273                      | 9                     |
| Splice Isoform Short of Probable ubiquitin carboxyl-terminal hydrolase FAF-X         | 289438                | IPI00003964.1 | 2.945                       | 7                     |
| Splice Isoform Short of Proteasome subunit alpha type 1                              | 29537                 | IPI00016832.1 | 71.863                      | 21                    |
| Splice Isoform Short of RNA-binding protein FUS                                      | 53323                 | IPI00221354.1 | 15.619                      | 6                     |
| Splice Isoform Short of TATA-binding protein associated factor 2N                    | 61521                 | IPI00020194.1 | 27.844                      | 9                     |
| Splice Isoform SM-B' of Small nuclear ribonucleoprotein associated proteins B and B' | 24594                 | IPI00027285.1 | 12.917                      | 3                     |
| Splice Isoform SNAP-25b of Synaptosomal-associated protein 25                        | 23300                 | IPI00010470.3 | 27.67                       | 5                     |
| Splice Isoform Sp100-HMG of Nuclear autoantigen Sp-100                               | 100354                | IPI00011675.1 | 4.664                       | 4                     |
| Splice Isoform SRP40-1 of Splicing factor, arginine/serine-rich 5                    | 31245                 | IPI00012341.1 | 16.544                      | 3                     |
| Splice Isoform SRP55-1 of Splicing factor, arginine/serine-rich 6                    | 39563                 | IPI00012345.2 | 12.5                        | 5                     |
| Splice Isoform SV12 of PITSLRE serine/threonine-protein kinase CDC2L2                | 18099                 | IPI00024413.2 | 17.964                      | 2                     |
| Splice Isoform Synapsin IA of Synapsin-1                                             | 73909                 | IPI00300568.3 | 11.773                      | 3                     |
| Splice Isoform TGN51 of Trans-Golgi network integral membrane protein 2 precursor    | 50976                 | IPI00012545.1 | 22.083                      | 7                     |
| Splice Isoform UBF1 of Nucleolar transcription factor 1                              | 89350                 | IPI00014533.1 | 15.969                      | 10                    |
| Splice Isoform UNPEL of Ubiquitin carboxyl-terminal hydrolase 4                      | 108496                | IPI00011836.1 | 4.05                        | 2                     |
| Splice Isoform XD of Plasma membrane calcium-transporting ATPase 4                   | 137833                | IPI00012490.1 | 16.277                      | 14                    |
| Spliceosome RNA helicase BAT1                                                        | 48960                 | IPI00328343.7 | 28.271                      | 14                    |
| Splicing factor 3 subunit 1                                                          | 88831                 | IPI00017451.1 | 23.329                      | 13                    |
| Splicing factor 3A subunit 2                                                         | 49224                 | IPI00017341.2 | 8.836                       | 3                     |
| Splicing factor 3A subunit 3                                                         | 58812                 | IPI00029764.1 | 32.136                      | 9                     |
| Splicing factor 3B subunit 1                                                         | 145723                | IPI00026089.3 | 27.531                      | 22                    |
| Splicing factor 3B Subunit 2                                                         | 100165                | IPI00221106.5 | 35.419                      | 22                    |
| Splicing factor 3B subunit 3                                                         | 135507                | IPI00300371.3 | 14.626                      | 12                    |

| Protein Description                                                                    | Molecular Weight (Da) | IPI Number    | Total Sequence Coverage (%) | Total Unique Peptides |
|----------------------------------------------------------------------------------------|-----------------------|---------------|-----------------------------|-----------------------|
| Splicing factor 3B subunit 5                                                           | 10129                 | IPI00010404.1 | 27.907                      | 2                     |
| Splicing factor arginine/serine-rich 11                                                | 53510                 | IPI00464952.2 | 13.43                       | 4                     |
| Splicing factor U2AF 35 kDa subunit                                                    | 27854                 | IPI00005613.1 | 22.083                      | 4                     |
| Splicing factor U2AF 65 kDa subunit                                                    | 53467                 | IPI00031556.5 | 29.684                      | 6                     |
| Splicing factor, arginine/Serine-rich 1 (Splicing factor 2, alternate Splicing factor) | 27728                 | IPI00215884.3 | 33.871                      | 10                    |
| Splicing factor, arginine/serine-rich 2                                                | 25330                 | IPI00005978.5 | 17.727                      | 4                     |
| Splicing factor, arginine/serine-rich 3                                                | 19318                 | IPI00010204.1 | 48.78                       | 10                    |
| Splicing factor, arginine/serine-rich 4                                                | 56645                 | IPI00000015.2 | 16.397                      | 8                     |
| Splicing factor, arginine/serine-rich 9                                                | 25526                 | IPI00012340.1 | 19.457                      | 5                     |
| SPUF protein precursor                                                                 | 18845                 | IPI00002525.3 | 55.233                      | 9                     |
| Squamous cell carcinoma antigen 2                                                      | 44825                 | IPI00010303.1 | 13.59                       | 4                     |
| SR protein                                                                             | 34089                 | IPI00033561.2 | 23.607                      | 5                     |
| Src substrate cortactin                                                                | 61599                 | IPI00029601.3 | 4.182                       | 2                     |
| SRPK1a protein kinase                                                                  | 92349                 | IPI00290439.1 | 6.416                       | 3                     |
| SR-related CTD associated factor 6                                                     | 103531                | IPI00333010.5 | 5.131                       | 2                     |
| SSGL9393                                                                               | 53187                 | IPI00432751.1 | 11.489                      | 3                     |
| SSX2 interacting protein RAB3IP, isoform alpha2                                        | 52988                 | IPI00044842.1 | 14.496                      | 4                     |
| STAM                                                                                   | 59142                 | IPI00020178.1 | 8.333                       | 5                     |
| Staphylococcal nuclease domain containing protein 1                                    | 101934                | IPI00140420.4 | 59.56                       | 47                    |
| START domain containing 10                                                             | 40522                 | IPI00186008.1 | 9.749                       | 3                     |
| Stathmin                                                                               | 17161                 | IPI00479997.3 | 72.297                      | 13                    |
| STATIP1 protein                                                                        | 92517                 | IPI00015560.5 | 7.143                       | 2                     |
| Steroid dehydrogenase homolog                                                          | 34302                 | IPI00007676.1 | 23.718                      | 7                     |
| Sterol O-acyltransferase 1                                                             | 64692                 | IPI00019898.6 | 5.818                       | 2                     |
| Sterol-4-alpha-carboxylate 3-dehydrogenase, decarboxylating                            | 41874                 | IPI00019407.1 | 21.984                      | 4                     |
| Stomatin-like protein 2                                                                | 38510                 | IPI00334190.4 | 63.764                      | 19                    |
| Stress-70 protein, mitochondrial precursor                                             | 73635                 | IPI00007765.5 | 60.53                       | 41                    |
| Stress-induced-phosphoprotein 1                                                        | 62599                 | IPI00013894.1 | 51.934                      | 30                    |
| Striatin                                                                               | 86091                 | IPI00014456.1 | 4.744                       | 2                     |
| Striatin 4                                                                             | 80532                 | IPI00003016.1 | 5.445                       | 3                     |
| Stromal interaction molecule 1                                                         | 77375                 | IPI00166512.1 | 20.438                      | 11                    |
| Structural maintenance of chromosome 1-like 1 protein                                  | 143144                | IPI00291939.1 | 23.439                      | 23                    |
| Structural maintenance of chromosome 3                                                 | 141592                | IPI00219420.2 | 16.174                      | 14                    |
| Structure-specific recognition protein 1                                               | 81024                 | IPI00005154.1 | 6.206                       | 3                     |
| Succinate dehydrogenase [ubiquinone] flavoprotein subunit, mitochondrial precursor     | 72645                 | IPI00305166.1 | 39.307                      | 18                    |
| Succinate dehydrogenase [ubiquinone] iron-sulfur protein, mitochondrial precursor      | 31609                 | IPI00294911.1 | 34.643                      | 8                     |

| Protein Description                                                                           | Molecular Weight (Da) | IPI Number    | Total Sequence Coverage (%) | Total Unique Peptides |
|-----------------------------------------------------------------------------------------------|-----------------------|---------------|-----------------------------|-----------------------|
| Succinate semialdehyde dehydrogenase, mitochondrial precursor                                 | 57178                 | IPI00019888.1 | 14.019                      | 7                     |
| Succinyl-CoA ligase [GDP-forming] alpha-chain, mitochondrial precursor                        | 35025                 | IPI00295625.1 | 38.739                      | 11                    |
| Succinyl-CoA ligase [GDP-forming] beta-chain, mitochondrial precursor                         | 46481                 | IPI00096066.2 | 49.537                      | 19                    |
| Succinyl-CoA:3-ketoacid-coenzyme A transferase 1, mitochondrial precursor                     | 56122                 | IPI00026516.1 | 39.808                      | 14                    |
| Sulfide:quinone oxidoreductase, mitochondrial precursor                                       | 49929                 | IPI00009634.1 | 45.333                      | 18                    |
| Sulfite oxidase, mitochondrial precursor                                                      | 53851                 | IPI00019987.1 | 16.189                      | 3                     |
| Superoxide dismutase                                                                          | 15795                 | IPI00218733.2 | 91.503                      | 17                    |
| Superoxide dismutase [Mn], mitochondrial precursor                                            | 24707                 | IPI00022314.1 | 86.486                      | 20                    |
| Suppressor of actin 1                                                                         | 66908                 | IPI00022275.5 | 12.947                      | 7                     |
| Suppressor of G2 allele of SKP1 homolog                                                       | 37781                 | IPI00009149.1 | 22.523                      | 4                     |
| SUPT16H protein                                                                               | 73051                 | IPI00026970.3 | 7.632                       | 4                     |
| Supt5h protein                                                                                | 120925                | IPI00298058.1 | 8.924                       | 7                     |
| SV2A protein                                                                                  | 82642                 | IPI00465374.2 | 2.695                       | 2                     |
| SWAP-70 homolog                                                                               | 68955                 | IPI00307200.5 | 12.479                      | 5                     |
| SWI/SNF related matrix associated actin dependent regulator of chromatin subfamily A member 5 | 121828                | IPI00297211.1 | 7.985                       | 6                     |
| SWI/SNF-related matrix-associated actin-dependent regulator of chromatin subfamily C member 1 | 122676                | IPI00234252.2 | 1.448                       | 2                     |
| Symplekin                                                                                     | 126420                | IPI00023344.1 | 9.37                        | 5                     |
| Synapse associated protein 1                                                                  | 39909                 | IPI00059242.3 | 33.523                      | 11                    |
| Synaptic vesicle membrane protein VAT-1 homolog                                               | 41893                 | IPI00156689.3 | 60.814                      | 19                    |
| Synaptojanin 2 binding protein                                                                | 15918                 | IPI00299193.1 | 54.483                      | 6                     |
| SynaptoSomal-aSSociated protein 23 iSoform SNAP23A                                            | 23340                 | IPI00010438.2 | 13.27                       | 2                     |
| SynaptoSomal-aSSociated protein 29                                                            | 28953                 | IPI00032831.4 | 19.767                      | 5                     |
| Synaptotagmin VII                                                                             | 45473                 | IPI00012902.3 | 10.174                      | 2                     |
| Synaptotagmin-5                                                                               | 42873                 | IPI00011727.2 | 6.995                       | 2                     |
| Syntaxin 7                                                                                    | 29827                 | IPI00289876.2 | 16.092                      | 3                     |
| Syntaxin binding protein 2                                                                    | 66396                 | IPI00019971.3 | 30.017                      | 10                    |
| Syntaxin binding protein 5                                                                    | 127492                | IPI00171407.4 | 12.511                      | 11                    |
| Syntaxin-12                                                                                   | 31622                 | IPI00329332.1 | 24.275                      | 4                     |
| Syntaxin-17                                                                                   | 33398                 | IPI00012028.1 | 8.278                       | 2                     |
| Syntaxin-18                                                                                   | 38650                 | IPI00027194.1 | 20                          | 5                     |
| Syntaxin-4                                                                                    | 34159                 | IPI00029730.1 | 31.65                       | 5                     |
| Syntaxin-5                                                                                    | 34065                 | IPI00012005.3 | 17.94                       | 3                     |
| Syntaxin-binding protein 3                                                                    | 67531                 | IPI00297626.3 | 8.446                       | 4                     |
| Syntenin 1                                                                                    | 32424                 | IPI00299086.3 | 23.826                      | 4                     |
| SYT interacting protein SIP                                                                   | 69449                 | IPI00013174.2 | 23.767                      | 14                    |

| Protein Description                                     | Molecular Weight (Da) | IPI Number    | Total Sequence Coverage (%) | Total Unique Peptides |
|---------------------------------------------------------|-----------------------|---------------|-----------------------------|-----------------------|
| Talin 1                                                 | 269550                | IPI00298994.3 | 50.925                      | 89                    |
| Talin 2                                                 | 271408                | IPI00219299.1 | 2.359                       | 2                     |
| TANK-binding kinase 1                                   | 83590                 | IPI00293613.1 | 4.39                        | 2                     |
| TAPBP protein                                           | 53935                 | IPI00007327.4 | 11.508                      | 2                     |
| TAR DNA-binding protein-43                              | 44711                 | IPI00025815.1 | 21.981                      | 9                     |
| TATA element modulatory factor                          | 123096                | IPI00010586.1 | 7.319                       | 5                     |
| TATA-binding protein-associated phosphoprotein          | 19432                 | IPI00008991.1 | 28.977                      | 4                     |
| TatD DNase domain containing 1                          | 33550                 | IPI00012463.3 | 5.051                       | 2                     |
| TB1 protein                                             | 47838                 | IPI00328383.2 | 5.275                       | 2                     |
| TBC1 domain family member 15                            | 79410                 | IPI00154645.5 | 6.512                       | 3                     |
| TBC1 domain family member 17                            | 72608                 | IPI00002957.1 | 12.809                      | 4                     |
| TBC1 domain family member 4                             | 146514                | IPI00220901.2 | 5.774                       | 5                     |
| T-cell immunomodulatory protein precursor               | 68064                 | IPI00006547.4 | 11.765                      | 6                     |
| T-complex protein 1, alpha subunit                      | 60306                 | IPI00290566.1 | 54.856                      | 23                    |
| T-complex protein 1, beta subunit                       | 57321                 | IPI00297779.6 | 65.543                      | 32                    |
| T-complex protein 1, delta subunit                      | 57757                 | IPI00302927.5 | 54.647                      | 20                    |
| T-complex protein 1, epsilon subunit                    | 59633                 | IPI00010720.1 | 68.946                      | 33                    |
| T-complex protein 1, eta subunit                        | 59329                 | IPI00018465.1 | 41.436                      | 16                    |
| T-complex protein 1, theta subunit                      | 59741                 | IPI00302925.3 | 46.364                      | 26                    |
| T-complex protein 1, zeta subunit                       | 57857                 | IPI00027626.2 | 45.472                      | 22                    |
| Telomerase-binding protein p23                          | 18685                 | IPI00015029.1 | 35                          | 5                     |
| Telomeric repeat binding factor 2 interacting protein 1 | 44233                 | IPI00008961.1 | 15.288                      | 3                     |
| Tensin                                                  | 185562                | IPI00307545.1 | 12.334                      | 10                    |
| Tensin2                                                 | 138757                | IPI00396051.1 | 3.58                        | 2                     |
| TeTraTricopeptide repeat domain 19                      | 55768                 | IPI00170855.1 | 3.992                       | 2                     |
| Tetratricopeptide repeat protein 11                     | 16927                 | IPI00007052.4 | 16.447                      | 3                     |
| TFAR15                                                  | 24642                 | IPI00298558.1 | 26.415                      | 5                     |
| TFG protein                                             | 43421                 | IPI00099999.1 | 14                          | 4                     |
| TGF-beta resistance-associated protein TRAG             | 160393                | IPI00289815.1 | 2.265                       | 2                     |
| THAP domain protein 4                                   | 62851                 | IPI00100399.2 | 7.452                       | 2                     |
| Thiamine-triphosphatase                                 | 25419                 | IPI00013621.3 | 25.764                      | 2                     |
| Thimet oligopeptidase 1                                 | 78773                 | IPI00216299.6 | 9.434                       | 6                     |
| Thioesterase superfamily member 2                       | 14951                 | IPI00020530.1 | 52.143                      | 5                     |
| Thiopurine S-methyltransferase                          | 28162                 | IPI00019400.1 | 5.714                       | 2                     |
| Thioredoxin                                             | 11599                 | IPI00216298.5 | 30.769                      | 5                     |
| Thioredoxin domain containing protein 1 precursor       | 31771                 | IPI00395887.2 | 12.143                      | 3                     |
| Thioredoxin domain containing protein 4 precursor       | 46941                 | IPI00401264.5 | 61.084                      | 15                    |

| Protein Description                                                   | Molecular Weight (Da) | IPI Number    | Total Sequence Coverage (%) | Total Unique Peptides |
|-----------------------------------------------------------------------|-----------------------|---------------|-----------------------------|-----------------------|
| Thioredoxin domain containing protein 5 precursor                     | 47599                 | IPI00171438.2 | 21.759                      | 8                     |
| Thioredoxin reductase 1                                               | 70527                 | IPI00554786.1 | 31.221                      | 15                    |
| Thioredoxin-dependent peroxide reductase, mitochondrial precursor     | 27675                 | IPI00024919.3 | 42.188                      | 9                     |
| Thioredoxin-like protein 1                                            | 32100                 | IPI00305692.4 | 43.056                      | 9                     |
| Thioredoxin-like protein 2                                            | 37408                 | IPI00008552.4 | 11.642                      | 3                     |
| Thioredoxin-like protein KIAA1162 precursor                           | 38928                 | IPI00100247.3 | 8.596                       | 2                     |
| Thioredoxin-like protein p19 precursor                                | 19194                 | IPI00026328.3 | 44.767                      | 6                     |
| Thiosulfate sulfurtransferase                                         | 33277                 | IPI00216293.5 | 30.405                      | 8                     |
| THO complex 2                                                         | 173588                | IPI00158615.5 | 1.453                       | 2                     |
| THO complex subunit 4                                                 | 26741                 | IPI00328840.5 | 45.703                      | 7                     |
| Threonine synthase-like 1                                             | 83017                 | IPI00016287.3 | 12.921                      | 6                     |
| Threonyl-tRNA synthetase, cytoplasmic                                 | 83382                 | IPI00329633.5 | 14.799                      | 11                    |
| Thymidine phosphorylase precursor                                     | 49950                 | IPI00292858.3 | 39.004                      | 14                    |
| Thymidylate kinase                                                    | 23804                 | IPI00013862.5 | 10.377                      | 2                     |
| Thymosin beta-10                                                      | 4892                  | IPI00220827.4 | 62.791                      | 14                    |
| Thymosin-like 3                                                       | 5060                  | IPI00180240.2 | 61.364                      | 11                    |
| Thymosin-like 4                                                       | 5110                  | IPI00376165.2 | 50                          | 3                     |
| Thyroid hormone receptor-associated protein complex 150 kDa component | 108629                | IPI00104050.2 | 24.293                      | 16                    |
| Thyroid receptor interacting protein 11                               | 227500                | IPI00003515.1 | 15.816                      | 17                    |
| Tight junction protein 1 isoform a                                    | 195797                | IPI00216219.1 | 19.565                      | 20                    |
| Tight junction protein 3 (zona occludens 3)                           | 104764                | IPI00293451.4 | 4.412                       | 3                     |
| TIM14 protein                                                         | 12491                 | IPI00304306.3 | 27.586                      | 2                     |
| TIP120A protein                                                       | 136317                | IPI00100160.2 | 26.179                      | 31                    |
| Tissue alpha-L-fucosidase precursor                                   | 53142                 | IPI00299026.3 | 27.983                      | 9                     |
| Titin                                                                 | 3813840               | IPI00179357.1 | 0.236                       | 4                     |
| Toll-interacting protein                                              | 30262                 | IPI00100154.1 | 19.708                      | 4                     |
| TOM1 protein                                                          | 53795                 | IPI00023191.3 | 40.447                      | 14                    |
| TP53 regulating kinase                                                | 28143                 | IPI00290305.3 | 10.672                      | 2                     |
| TPM1 protein                                                          | 28368                 | IPI00384369.2 | 62.449                      | 24                    |
| Transaldolase                                                         | 37516                 | IPI00024102.3 | 51.335                      | 27                    |
| Transcription elongation factor A                                     | 22489                 | IPI00478127.3 | 42                          | 8                     |
| Transcription elongation factor A (SII)-like 5                        | 23293                 | IPI00257932.1 | 17.961                      | 2                     |
| Transcription elongation factor B polypeptide 1                       | 12465                 | IPI00300341.5 | 38.393                      | 4                     |
| Transcription elongation factor B polypeptide 2                       | 13125                 | IPI00026670.3 | 48.305                      | 4                     |
| Transcription elongation factor B polypeptide 3                       | 87176                 | IPI00018404.3 | 5.959                       | 2                     |
| Transcription elongation regulator 1                                  | 123882                | IPI00247871.1 | 6.557                       | 4                     |
| Transcription factor A, mitochondrial precursor                       | 29078                 | IPI00020928.1 | 23.984                      | 5                     |

| Protein Description                                             | Molecular Weight (Da) | IPI Number    | Total Sequence Coverage (%) | Total Unique Peptides |
|-----------------------------------------------------------------|-----------------------|---------------|-----------------------------|-----------------------|
| Transcription factor ELYS                                       | 252402                | IPI00170594.1 | 3.398                       | 4                     |
| Transcription initiation factor IIF, alpha subunit              | 58205                 | IPI00017450.2 | 8.317                       | 4                     |
| Transcription initiation factor IIF, beta subunit               | 28363                 | IPI00329767.2 | 12.851                      | 2                     |
| Transcription repressor                                         | 82623                 | IPI00382733.1 | 28.723                      | 16                    |
| Transcriptional activator protein PUR-alpha                     | 34889                 | IPI00023591.1 | 40.683                      | 11                    |
| Transducer of Cdc42-dependent actin assembly-1                  | 63532                 | IPI00015580.2 | 14.077                      | 4                     |
| Transducin beta-like 2 protein                                  | 49766                 | IPI00000948.3 | 11.857                      | 4                     |
| Transferrin receptor protein 1                                  | 84848                 | IPI00022462.1 | 9.868                       | 5                     |
| Transforming growth factor-beta induced protein IG-H3 precursor | 74634                 | IPI00018219.1 | 9.224                       | 4                     |
| Transforming protein RhoA                                       | 21754                 | IPI00027500.1 | 20.725                      | 5                     |
| Transgelin 2                                                    | 24438                 | IPI00024057.2 | 77.273                      | 18                    |
| Transitional endoplasmic reticulum ATPase                       | 89135                 | IPI00022774.2 | 71.925                      | 61                    |
| Transketolase                                                   | 67835                 | IPI00021716.1 | 72.713                      | 43                    |
| Translation initiation factor eIF-2B beta subunit               | 38965                 | IPI00028083.1 | 21.083                      | 4                     |
| Translation initiation factor IF-2, mitochondrial precursor     | 81293                 | IPI00005039.1 | 4.952                       | 2                     |
| Translin                                                        | 26167                 | IPI00018768.1 | 27.632                      | 5                     |
| Translin-associated protein X                                   | 33092                 | IPI00293350.3 | 41.724                      | 8                     |
| Translocase of inner mitochondrial membrane 50 homolog          | 50433                 | IPI00418497.1 | 12.939                      | 5                     |
| Translocated promoter region                                    | 267131                | IPI00022970.3 | 31.782                      | 52                    |
| Translocation protein SEC63 homolog                             | 87811                 | IPI00218922.4 | 4.743                       | 3                     |
| Translocation protein-1                                         | 45833                 | IPI00019004.1 | 9.273                       | 6                     |
| Translocon-associated protein, alpha subunit precursor          | 32215                 | IPI00301021.1 | 11.888                      | 4                     |
| Translocon-associated protein, delta subunit precursor          | 18987                 | IPI00019385.1 | 38.15                       | 7                     |
| Translocon-associated protein, gamma subunit                    | 21067                 | IPI00009235.1 | 19.459                      | 4                     |
| Transmembrane 9 superfamily protein member 2 precursor          | 75725                 | IPI00018415.1 | 2.112                       | 2                     |
| Transmembrane 9 superfamily protein member 3 precursor          | 67843                 | IPI00030847.3 | 11.036                      | 4                     |
| Transmembrane 9 superfamily protein member 4                    | 72494                 | IPI00021985.1 | 13.12                       | 6                     |
| Transmembrane anchor protein 1                                  | 21452                 | IPI00465377.1 | 31.373                      | 6                     |
| Transmembrane and coiled-coil domains 3                         | 53735                 | IPI00240059.3 | 4.612                       | 2                     |
| Transmembrane emp24 domain containing protein 4 precursor       | 25926                 | IPI00296259.4 | 30.837                      | 7                     |
| Transmembrane emp24 domain containing protein 5 precursor       | 25988                 | IPI00294472.3 | 21.834                      | 3                     |
| Transmembrane emp24 domain containing protein 9 precursor       | 25089                 | IPI00023542.4 | 43.458                      | 8                     |
| Transmembrane protein                                           | 80551                 | IPI00102885.3 | 8.227                       | 4                     |
| Transmembrane protein 32                                        | 14677                 | IPI00166785.1 | 26.718                      | 2                     |
| Transmembrane protein 43                                        | 44847                 | IPI00549988.1 | 33.5                        | 7                     |
| Transmembrane protein PT27                                      | 34883                 | IPI00307572.1 | 8.642                       | 2                     |
| Transmembrane protein Tmp21 precursor                           | 24960                 | IPI00028055.4 | 36.986                      | 13                    |



| Protein Description                                         | Molecular Weight (Da) | IPI Number    | Total Sequence Coverage (%) | Total Unique Peptides |
|-------------------------------------------------------------|-----------------------|---------------|-----------------------------|-----------------------|
| Transporter 1, ATP-binding cassette, sub-family B           | 87163                 | IPI00101026.3 | 10.272                      | 4                     |
| Transportin 1                                               | 101244                | IPI00024364.1 | 16.292                      | 9                     |
| Transportin 2                                               | 100343                | IPI00419856.1 | 3.269                       | 2                     |
| Transthyretin precursor                                     | 15877                 | IPI00022432.1 | 73.469                      | 14                    |
| Treacle major isoform                                       | 152013                | IPI00165041.2 | 7.056                       | 9                     |
| Tricarboxylate transport protein, mitochondrial precursor   | 33991                 | IPI00294159.3 | 29.26                       | 7                     |
| Trifunctional enzyme alpha subunit, mitochondrial precursor | 82947                 | IPI00031522.2 | 70.249                      | 57                    |
| Trifunctional enzyme beta subunit, mitochondrial precursor  | 51363                 | IPI00022793.4 | 63.368                      | 28                    |
| Trinucleotide repeat containing 4                           | 50515                 | IPI00293640.2 | 9.032                       | 3                     |
| Trinucleotide repeat containing 5                           | 30729                 | IPI00551062.2 | 13.669                      | 3                     |
| TRIO and F-actin binding protein                            | 67999                 | IPI00148768.3 | 7.926                       | 3                     |
| Triosephosphate isomerase 1                                 | 26653                 | IPI00465028.4 | 63.052                      | 19                    |
| Tripartite motif protein 25                                 | 70944                 | IPI00029629.1 | 18.73                       | 10                    |
| Tripartite motif protein 47                                 | 69503                 | IPI00307165.1 | 14.107                      | 6                     |
| TRNA pseudouridine synthase A                               | 47440                 | IPI00001716.3 | 5.152                       | 2                     |
| Tropomodulin-1                                              | 40544                 | IPI00002375.3 | 57.66                       | 15                    |
| Tropomodulin-3                                              | 39570                 | IPI00005087.1 | 51.705                      | 10                    |
| Tropomyosin 4                                               | 28504                 | IPI00010779.3 | 36.694                      | 21                    |
| Trypsin I precursor                                         | 26541                 | IPI00011694.1 | 17.409                      | 4                     |
| Tryptophanyl-tRNA synthetase                                | 53132                 | IPI00295400.1 | 35.244                      | 14                    |
| Tryptophanyl-tRNA synthetase                                | 12233                 | IPI00383754.1 | 49.541                      | 4                     |
| Tryptophanyl-tRNA synthetase, mitochondrial precursor       | 40121                 | IPI00025050.1 | 25.278                      | 5                     |
| TSC22 domain family protein 1                               | 15670                 | IPI00019355.1 | 42.361                      | 5                     |
| T-Star                                                      | 38776                 | IPI00008570.1 | 7.514                       | 2                     |
| Tu translation elongation factor, mitochondrial             | 49843                 | IPI00027107.3 | 62.198                      | 25                    |
| TU12B1-TY protein                                           | 63379                 | IPI00465170.1 | 7.299                       | 2                     |
| TUBA6 protein                                               | 36625                 | IPI00166768.1 | 32.923                      | 10                    |
| Tubulin alpha-1 chain                                       | 49892                 | IPI00007750.1 | 61.607                      | 27                    |
| Tubulin beta-2 chain                                        | 49639                 | IPI00011654.2 | 17.342                      | 6                     |
| Tubulin beta-4 chain                                        | 49599                 | IPI00023598.1 | 66.892                      | 20                    |
| Tubulin gamma-1 chain                                       | 51138                 | IPI00295081.1 | 10.643                      | 3                     |
| Tubulin polymerization-promoting protein                    | 23679                 | IPI00013043.1 | 36.53                       | 6                     |
| Tubulin, beta polypeptide paralog                           | 49921                 | IPI00031370.3 | 61.124                      | 20                    |
| Tubulin-specific chaperone A                                | 12716                 | IPI00217236.3 | 73.832                      | 11                    |
| Tubulin-specific chaperone B                                | 27308                 | IPI00293126.1 | 40.164                      | 10                    |
| Tumor necrosis factor, alpha-induced protein 2              | 72617                 | IPI00304866.3 | 8.869                       | 4                     |
| Tumor protein p53 inducible protein 3                       | 35514                 | IPI00021237.3 | 7.53                        | 2                     |

| Protein Description                                                              | Molecular Weight (Da) | IPI Number    | Total Sequence Coverage (%) | Total Unique Peptides |
|----------------------------------------------------------------------------------|-----------------------|---------------|-----------------------------|-----------------------|
| Tumor protein, translationally-controlled 1                                      | 21512                 | IPI00009943.2 | 50                          | 6                     |
| Tumor-associated calcium signal transducer 1 precursor                           | 34898                 | IPI00296215.1 | 27.707                      | 8                     |
| Tumor-associated calcium signal transducer 2 precursor                           | 35687                 | IPI00297910.1 | 5.882                       | 2                     |
| Twinfilin isoform 1                                                              | 43891                 | IPI00183508.2 | 28.385                      | 7                     |
| Type 1 Tumor necrosis factor receptor shedding aminopeptidase regulator          | 107693                | IPI00165949.1 | 4.747                       | 4                     |
| Tyrosine-protein kinase JAK1                                                     | 131872                | IPI00011633.1 | 2.452                       | 2                     |
| Tyrosine-protein phosphatase, non-receptor type 1                                | 49935                 | IPI00297261.3 | 16.552                      | 4                     |
| Tyrosine-protein phosphatase, non-receptor type 11                               | 67968                 | IPI00298347.1 | 23.777                      | 11                    |
| Tyrosine-protein phosphatase, non-receptor type 12                               | 88065                 | IPI00289082.2 | 3.077                       | 2                     |
| Tyrosyl-tRNA synthetase, cytoplasmic                                             | 58975                 | IPI00007074.4 | 39.658                      | 18                    |
| U1 small nuclear ribonucleoprotein A                                             | 31128                 | IPI00012382.2 | 17.794                      | 3                     |
| U2 small nuclear ribonucleoprotein A'                                            | 28398                 | IPI00297477.3 | 47.451                      | 12                    |
| U2 small nuclear ribonucleoprotein B                                             | 25470                 | IPI00029267.1 | 19.556                      | 3                     |
| U3 small nucleolar ribonucleoprotein protein MPP10                               | 78816                 | IPI00012149.1 | 5.433                       | 2                     |
| U3 small nucleolar RNA interacting protein 2                                     | 51809                 | IPI00217862.5 | 5.474                       | 3                     |
| U4/U6 snRNP-associated 61 kDa protein                                            | 55407                 | IPI00292000.5 | 26.052                      | 9                     |
| U5 small nuclear ribonucleoprotein 200 kDa helicase                              | 244353                | IPI00420014.2 | 18.024                      | 27                    |
| U5 snRNP 100 kD protein                                                          | 95588                 | IPI00006725.1 | 7.195                       | 6                     |
| U5 snRNP-associated 102 kDa protein                                              | 106858                | IPI00305068.5 | 3.294                       | 2                     |
| U5 snRNP-specific 40 kDa protein                                                 | 39274                 | IPI00006723.3 | 32.213                      | 6                     |
| U6 snRNA-associated Sm-like protein LSm3                                         | 11707                 | IPI00219229.2 | 47.525                      | 3                     |
| U6 snRNA-associated Sm-like protein LSm4                                         | 15340                 | IPI00294955.3 | 13.669                      | 2                     |
| U6 snRNA-associated Sm-like protein LSm5                                         | 9800                  | IPI00220493.4 | 30                          | 2                     |
| U6 snRNA-associated Sm-like protein LSm7                                         | 11595                 | IPI00007163.1 | 39.806                      | 4                     |
| U6 snRNA-associated Sm-like protein LSm8                                         | 10265                 | IPI00219871.4 | 35.789                      | 2                     |
| Ubiquilin-2                                                                      | 65724                 | IPI00409659.1 | 19.231                      | 7                     |
| Ubiquinol-cytochrome c reductase complex 11 kDa protein, mitochondrial precursor | 10732                 | IPI00296022.1 | 42.857                      | 2                     |
| Ubiquinol-cytochrome c reductase complex 14 kDa protein                          | 13391                 | IPI00220416.2 | 66.364                      | 9                     |
| Ubiquinol-cytochrome c reductase complex ubiquinone-binding protein QP-C         | 9769                  | IPI00024742.4 | 40.741                      | 4                     |
| Ubiquinol-cytochrome c reductase iron-sulfur subunit, mitochondrial precursor    | 29633                 | IPI00026964.1 | 43.066                      | 11                    |
| Ubiquinol-cytochrome-c reductase complex core protein 2, mitochondrial precursor | 48413                 | IPI00305383.1 | 59.382                      | 19                    |
| Ubiquinol-cytochrome-c reductase complex core protein I, mitochondrial precursor | 52585                 | IPI00013847.3 | 43.333                      | 19                    |
| Ubiquinone biosynthesis monooxygenase COQ6                                       | 50838                 | IPI00032633.4 | 8.761                       | 4                     |
| Ubiquitin and ribosomal protein S27a                                             | 17893                 | IPI00179330.5 | 33.974                      | 4                     |

| Protein Description                                                | Molecular Weight (Da) | IPI Number    | Total Sequence Coverage (%) | Total Unique Peptides |
|--------------------------------------------------------------------|-----------------------|---------------|-----------------------------|-----------------------|
| Ubiquitin associated protein 2-like                                | 104094                | IPI00029019.5 | 20.812                      | 11                    |
| Ubiquitin carboxyl-terminal hydrolase 10                           | 87080                 | IPI00291946.5 | 8.145                       | 4                     |
| Ubiquitin carboxyl-terminal hydrolase 14                           | 55902                 | IPI00219913.9 | 33.469                      | 13                    |
| Ubiquitin carboxyl-terminal hydrolase 7                            | 128234                | IPI00003965.3 | 12.432                      | 7                     |
| Ubiquitin carboxyl-terminal hydrolase isozyme L1                   | 24808                 | IPI00018352.1 | 69.058                      | 16                    |
| Ubiquitin carboxyl-terminal hydrolase isozyme L3                   | 26166                 | IPI00011250.3 | 41.304                      | 7                     |
| Ubiquitin conjugation factor E4 A                                  | 123458                | IPI00028957.1 | 2.61                        | 2                     |
| Ubiquitin fusion degradation 1-like                                | 34478                 | IPI00218292.2 | 24.43                       | 7                     |
| Ubiquitin ligase E3 alpha-II                                       | 200408                | IPI00217407.1 | 1.652                       | 2                     |
| Ubiquitin-activating enzyme E1                                     | 56816                 | IPI00026119.4 | 43.874                      | 17                    |
| Ubiquitin-activating enzyme E1                                     | 25036                 | IPI00552452.1 | 52.991                      | 11                    |
| Ubiquitin-activating enzyme E1C                                    | 51847                 | IPI00328154.3 | 8.639                       | 2                     |
| Ubiquitin-associated domain containing protein                     | 33560                 | IPI00027378.3 | 21.667                      | 4                     |
| Ubiquitin-conjugating enzyme                                       | 27149                 | IPI00418603.1 | 12.185                      | 2                     |
| Ubiquitin-conjugating enzyme E2 D3                                 | 16676                 | IPI00026965.1 | 42.857                      | 4                     |
| Ubiquitin-conjugating enzyme E2 I                                  | 17995                 | IPI00032957.1 | 16.456                      | 2                     |
| Ubiquitin-conjugating enzyme E2 L3                                 | 17850                 | IPI00021347.1 | 63.636                      | 8                     |
| Ubiquitin-conjugating enzyme E2 M                                  | 20887                 | IPI00022597.1 | 17.486                      | 3                     |
| Ubiquitin-conjugating enzyme E2 N                                  | 17127                 | IPI00003949.1 | 73.684                      | 8                     |
| Ubiquitin-conjugating enzyme E2 variant 2                          | 16352                 | IPI00019600.1 | 47.586                      | 4                     |
| Ubiquitin-like 1 activating enzyme E1A                             | 38426                 | IPI00033130.3 | 22.543                      | 5                     |
| Ubiquitin-like 2 activating enzyme E1B                             | 71179                 | IPI00023234.3 | 32.031                      | 10                    |
| Ubiquitin-like protein fUbi and ribosomal protein S30 precursor    | 14381                 | IPI00019770.1 | 9.023                       | 3                     |
| Ubiquitin-like protein SMT3C precursor                             | 11550                 | IPI00303105.3 | 19.802                      | 2                     |
| Ubiquitin--protein ligase EDD                                      | 309158                | IPI00026320.1 | 2.179                       | 2                     |
| UBX domain-containing protein 2                                    | 56743                 | IPI00293946.5 | 17.717                      | 7                     |
| UDP-glucose 4-epimerase                                            | 38285                 | IPI00553131.1 | 24.713                      | 3                     |
| UDP-glucose 6-dehydrogenase                                        | 54989                 | IPI00031420.1 | 57.692                      | 32                    |
| UDP-glucose pyrophosphorylase 2 isoform a                          | 56905                 | IPI00329331.3 | 39.567                      | 18                    |
| UDP-glucose:glycoprotein glucosyltransferase 1 precursor           | 177078                | IPI00024466.1 | 26.495                      | 30                    |
| UMP-CMP kinase                                                     | 25838                 | IPI00219953.1 | 51.754                      | 16                    |
| UMP-CMP kinase                                                     | 19002                 | IPI00514049.1 | 33.333                      | 5                     |
| Uncharacterized hematopoietic stem/progenitor cells protein MDS029 | 12191                 | IPI00020510.1 | 49.074                      | 6                     |
| UPF0082 protein                                                    | 32457                 | IPI00019903.1 | 17.172                      | 3                     |
| UPF0185 protein BM-002                                             | 9112                  | IPI00010207.1 | 72.941                      | 4                     |
| UPF0198 protein CGI-141                                            | 15415                 | IPI00007061.1 | 20.29                       | 2                     |
| UPF0202 protein KIAA1709                                           | 115631                | IPI00300127.3 | 3.707                       | 2                     |

| Protein Description                                           | Molecular Weight (Da) | IPI Number    | Total Sequence Coverage (%) | Total Unique Peptides |
|---------------------------------------------------------------|-----------------------|---------------|-----------------------------|-----------------------|
| UPF0240 protein C6orf66                                       | 20254                 | IPI00023064.1 | 20.571                      | 2                     |
| UPF0315 protein                                               | 14190                 | IPI00009010.3 | 25.6                        | 3                     |
| Uroporphyrinogen decarboxylase                                | 40761                 | IPI00301489.3 | 17.711                      | 3                     |
| Utrophin                                                      | 394248                | IPI00009329.1 | 4.981                       | 9                     |
| UV excision repair protein RAD23 homolog B                    | 43145                 | IPI00008223.3 | 28.606                      | 7                     |
| Uveal autoantigen                                             | 162479                | IPI00173359.1 | 4.944                       | 4                     |
| Vac14 homolog                                                 | 87917                 | IPI00025160.2 | 3.069                       | 2                     |
| Vacuolar ATP synthase catalytic subunit A, ubiquitous isoform | 68260                 | IPI00007682.2 | 57.374                      | 28                    |
| Vacuolar ATP synthase subunit B, brain isoform                | 56465                 | IPI00007812.1 | 63.209                      | 27                    |
| Vacuolar ATP synthase subunit C                               | 43914                 | IPI00007814.1 | 21.466                      | 6                     |
| Vacuolar ATP synthase subunit D                               | 28245                 | IPI00001568.1 | 27.126                      | 5                     |
| Vacuolar ATP synthase subunit d                               | 40303                 | IPI00034159.1 | 23.932                      | 5                     |
| Vacuolar ATP synthase subunit E                               | 26129                 | IPI00003856.1 | 69.912                      | 17                    |
| Vacuolar ATP synthase subunit G 1                             | 13749                 | IPI00025285.1 | 71.186                      | 8                     |
| Vacuolar ATP synthase subunit S1 precursor                    | 51993                 | IPI00020430.5 | 7.447                       | 2                     |
| Vacuolar protein sorting 11                                   | 107768                | IPI00300697.1 | 7.014                       | 5                     |
| Vacuolar protein sorting 26                                   | 38146                 | IPI00411426.3 | 12.538                      | 3                     |
| Vacuolar protein sorting 33A                                  | 67568                 | IPI00073179.1 | 8.389                       | 3                     |
| Vacuolar protein sorting 33B                                  | 70570                 | IPI00032905.2 | 4.862                       | 2                     |
| Vacuolar protein sorting 35                                   | 91649                 | IPI00018931.6 | 18.97                       | 11                    |
| Vacuolar protein sorting 37C                                  | 38635                 | IPI00401773.3 | 12.394                      | 2                     |
| Vacuolar protein sorting-associated protein 45                | 65036                 | IPI00090327.1 | 6.316                       | 2                     |
| Valyl-tRNA synthetase 2                                       | 140387                | IPI00000873.1 | 32.358                      | 28                    |
| VAMP2 protein                                                 | 12655                 | IPI00328127.5 | 35.345                      | 3                     |
| VAMP-associated protein of 33 kDa                             | 27875                 | IPI00170692.2 | 58.635                      | 14                    |
| Vasodilator-stimulated phosphoprotein                         | 39674                 | IPI00301058.4 | 21.636                      | 8                     |
| Vav 2 oncogene                                                | 96970                 | IPI00004977.2 | 2.741                       | 2                     |
| Very long-chain acyl-CoA synthetase homologue 3               | 87272                 | IPI00013623.3 | 3.822                       | 2                     |
| Vesicle trafficking protein SEC22b                            | 24725                 | IPI00006865.1 | 58.14                       | 16                    |
| Vesicle-associated membrane protein 3                         | 11303                 | IPI00019982.6 | 43                          | 4                     |
| Vesicle-associated membrane protein 8                         | 11431                 | IPI00030911.2 | 45                          | 4                     |
| Vesicular integral-membrane protein VIP36 precursor           | 40203                 | IPI00009950.1 | 42.135                      | 11                    |
| Vigilin                                                       | 141352                | IPI00022228.1 | 30.994                      | 30                    |
| Villin 1                                                      | 92506                 | IPI00218852.2 | 30.266                      | 15                    |
| Villin 2                                                      | 69199                 | IPI00549319.2 | 52.389                      | 31                    |
| Vimentin                                                      | 53488                 | IPI00418471.5 | 81.72                       | 52                    |
| Vinculin isoform VCL                                          | 116649                | IPI00291175.3 | 35.553                      | 29                    |

| Protein Description                                        | Molecular Weight (Da) | IPI Number    | Total Sequence Coverage (%) | Total Unique Peptides |
|------------------------------------------------------------|-----------------------|---------------|-----------------------------|-----------------------|
| Vitamin D-binding protein precursor                        | 52929                 | IPI00298853.5 | 24.684                      | 9                     |
| Voltage-dependent anion channel 2                          | 31547                 | IPI00411815.1 | 33.673                      | 8                     |
| Voltage-dependent anion-selective channel protein 1        | 30623                 | IPI00216308.4 | 62.411                      | 19                    |
| Von Hippel-Lindau binding protein 1                        | 22643                 | IPI00334159.2 | 32.487                      | 5                     |
| Von Willebrand factor A domain-related protein, isoform 1  | 46775                 | IPI00396383.1 | 20.449                      | 5                     |
| VPS13C-2A protein                                          | 422124                | IPI00465428.1 | 9.832                       | 21                    |
| VPS13D-2A protein                                          | 488722                | IPI00400836.2 | 0.39                        | 2                     |
| WD40 protein                                               | 35056                 | IPI00152695.2 | 9.265                       | 3                     |
| WD-repeat protein 1                                        | 66138                 | IPI00395750.3 | 43.564                      | 21                    |
| WD-repeat protein 11                                       | 136598                | IPI00412224.2 | 7.925                       | 4                     |
| WD-repeat protein 13                                       | 53662                 | IPI00016988.3 | 11.753                      | 3                     |
| WD-repeat protein 37                                       | 54616                 | IPI00032202.1 | 15.385                      | 4                     |
| WD-repeat protein 50                                       | 59066                 | IPI00000733.2 | 7.895                       | 2                     |
| Williams-Beuren Syndrome critical region protein 21 form D | 33842                 | IPI00171152.1 | 22.403                      | 4                     |
| Wiskott-Aldrich syndrome protein family member 2           | 54250                 | IPI00472164.2 | 6.426                       | 2                     |
| Wolframin                                                  | 100241                | IPI00008711.3 | 14.27                       | 10                    |
| WRNIP1 protein                                             | 69416                 | IPI00102997.1 | 4.375                       | 2                     |
| WUGSC:H_DJ0747G18.3 protein                                | 67218                 | IPI00069058.1 | 84.553                      | 70                    |
| Xaa-Pro dipeptidase                                        | 54382                 | IPI00257882.4 | 26.423                      | 6                     |
| XAP-5 protein                                              | 40216                 | IPI00030098.5 | 17.404                      | 5                     |
| XPA-binding protein 2                                      | 99946                 | IPI00163084.3 | 2.69                        | 2                     |
| XPR1 protein                                               | 73872                 | IPI00217110.1 | 7.765                       | 2                     |
| Yeast sds22 homolog                                        | 41539                 | IPI00033600.1 | 46.667                      | 14                    |
| ZBTB20 protein                                             | 73415                 | IPI00395693.4 | 5.988                       | 2                     |
| Zinc finger protein 148                                    | 88921                 | IPI00010833.1 | 5.29                        | 2                     |
| Zinc finger protein 289, ID1 regulated                     | 56685                 | IPI00297322.3 | 24.952                      | 7                     |
| Zinc finger protein 326                                    | 65613                 | IPI00373877.1 | 8.591                       | 3                     |
| Zinc finger protein 512                                    | 64572                 | IPI00097492.3 | 10.229                      | 4                     |
| Zinc finger protein IA-1                                   | 52890                 | IPI00005944.1 | 8.039                       | 2                     |
| Zinc finger RNA binding protein                            | 116939                | IPI00333858.2 | 4.562                       | 2                     |
| Zinc finger, CCHC domain containing 8                      | 78557                 | IPI00166422.4 | 5.092                       | 2                     |
| Zinc transporter SLC39A7                                   | 50087                 | IPI00021888.3 | 13.006                      | 3                     |
| Zinc-finger protein ubi-d4                                 | 44127                 | IPI00023322.1 | 10.23                       | 3                     |
| Zyxin                                                      | 61238                 | IPI00020513.1 | 23.252                      | 9                     |
